# Supplementary material for: Retrieval-augmented generation analysis of user reviews in Saudi mobile banking apps: a comparative user experience study of iOS and Android
Source: PeerJ journal article supplement (doi:10.7717/peerj-cs.3565), 2026-02-06
Supplement: Android.zip [file alahlimobile_final.xlsx]

## Sheet: Sheet 1 - alahlimobile_final
alahlimobile_final
source	review_id	review_description	user_name	review_date	developer_response	developer_response_date	thumbs_up	language_code	country_code	app_version	rating	en	cleaned_reviews	Sentiment	Satisfaction	Effectiveness	Efficiency
Google Play Store	0249f4d8-fc43-4a10-9bb3-fb457652fb84	The worst program ever 🤮🤮🤢	Younes 3li	##########			0	en	us		1	ar	bad program ever	Negative	1	0	0
Google Play Store	0ba35899-5727-4635-aa5b-2a8e3a98ef4d	The application does not open. I have uninstalled and installed it again, but it's the same. Only the logo appears at the beginning. Unfortunately, it's a bad start. For your information, my device is up to date and it is not rooted or jailbroken.	Mohammed Alshehri	##########			0	en	us		5	ar	application open uninstalled instal logo appear begin unfortunately bad start information device date root jailbroken	Negative	1	1	0
Google Play Store	98c8a482-180c-4e3a-a202-9f818511aba6	Bad, when opening the application, it requires opening the location and the application does not open even after opening the location.	Mahmoud Saad	##########			0	en	us		1	ar	bad open application require open location application open even open location	Negative	1	1	0
Google Play Store	e76d9296-fd83-4d6e-8046-f3f71ccdefee	Does not work outside the Kingdom, Egypt.	Amr Jazzar	##########			0	en	us		1	ar	work outside kingdom egypt	Negative	0	1	0
Google Play Store	7ea8bbf1-1c74-4fa3-a3aa-3cd9dc6db33e	SNB has forced you to activate your exact location in order to allow you to log in. In the latest update, you must allow Al-Ahli Bank to access your location data so that it can grant you access to the application.	Abdullah	##########			4	en	us		1	ar	snb force activate exact location order allow log late update must allow alahli bank access location data grant access application	Neutral	0	1	0
Google Play Store	0f05bb9b-7ef7-4370-9aa6-15f2f38edf39	The application is not working.	Slxa Aa	##########			0	en	us		1	ar	application work	Negative	0	1	0
Google Play Store	8690f577-857e-405a-8c48-23e4dc777ae5	The application is very laggy, and it needs to be uninstalled and downloaded for every operation.	ABO MOHAMMED ALMEHENA	##########			0	en	us		1	ar	application laggy need uninstalled download every operation	Negative	0	1	1
Google Play Store	3f82e096-72ed-4ec2-89a6-8e80604c56fe	The latest update requires you to specify your location	speed weeld	##########			3	en	us		1	ar	late update require specify location	Neutral	0	1	0
Google Play Store	b23a5e31-a43e-468d-a0af-2e4406ff82bf	The new update is very bad, it keeps asking for the location all the time. What's it got to do with my website? Open it and be quiet.	ma1000 sa	##########			3	en	us		1	ar	new update bad keep ask location time whats get website open quiet	Negative	1	0	0
Google Play Store	74012955-391a-4ea3-bf87-9159d7d6e837	nice	Ah Al	##########			0	en	us		5	ar	nice	Positive	0	0	0
Google Play Store	f3e23679-94e2-4975-9802-c228224b5871	Some credit cards do not appear in the application.	moh	##########			0	en	us		1	ar	credit card appear application	Neutral	0	1	0
Google Play Store	77227df0-aa6b-4bb4-ab6d-3e9451b84172	An application full of defects that does not live up to the name of Al Ahli Bank. Still, and still needs to be repaired. It is a useless application without an active location.	Hassan Fatthodeen	##########			0	en	us		1	ar	application full defect live name al ahli bank still still need repair useless application without active location	Negative	1	1	0
Google Play Store	7f2d2032-ed19-40b7-8597-ec3739b8b489	The latest update asks for location and I don't see any valid reason for requesting my current location. It's unnecessary and is annoying in the application.	Faisal AL-Shehri	2023-09-05 09:01:00			1	en	us		1	ar	late update ask location dont see valid reason request current location unnecessary annoy application	Negative	1	1	0
Google Play Store	a0792bdd-c545-4f88-8940-064b238bb6be	Trash App, the new update requests location.	M Ajed	2023-09-05 08:00:00			1	en	us		1	ar	trash app new update request location	Negative	1	0	0
Google Play Store	06f50b6c-2309-4e68-ab8d-320c6e5f8451	The new update is not working.	Amin Ali	##########			1	en	us		4	ar	new update work	Negative	0	1	0
Google Play Store	21eb5b9b-b184-4bbe-9c9d-890a8ec35edb	Everything is okay. I just hope the updates are less frequent, it's unreasonable.	All Aspects	##########			0	en	us		4	ar	everything okay hope update less frequent unreasonable	Neutral	1	0	1
Google Play Store	7b882a18-b9a0-4e4e-a4ac-52f30a57a3d8	The latest update requires site permissions. It is not the bank's right to prevent me from using the application and accessing my accounts if I refuse to grant site permissions. Al-Ahli Bank's actions go from bad to worse.	Turk sh	##########			1	en	us		1	ar	late update require site permissions bank right prevent use application access account refuse grant site permissions alahli bank action go bad bad	Negative	1	0	0
Google Play Store	1a50f0d9-d7f4-43c0-b8b4-5a424284e3e5	Large amounts are charged for sending financial transfers to Bangladesh.	shah riaj22	##########			0	en	us		1	ar	large amount charge send financial transfer bangladesh	Neutral	0	1	0
Google Play Store	e7fd3008-d628-4981-ad8b-c3ad94a714a5	Every time I open the application, it does not respond or work. I have to delete the application and reinstall it to be able to access it. Why hasn't the problem been resolved?	COLONEL	##########			0	en	us		3	ar	every time open application respond work delete application reinstall able access hasnt problem resolve	Negative	0	1	0
Google Play Store	e695e39b-537a-4c1e-8f11-fe024da28d5b	The update is mandatory to access the application. And the update is not being done correctly as it should.	ابرار عبدالكريم	##########			0	en	us		1	ar	update mandatory access application update do correctly	Negative	0	1	0
Google Play Store	c78d732b-d848-4db4-a429-9eb1a16c7163	The application works only once when installed on the phone. Then it completely stops working at the startup screen. And every time I uninstall it, then reinstall it again to access the services, and this is impractical!! Please solve the problem quickly.	Maryam Alquraini	##########			0	en	us		4	ar	application work instal phone completely stop work startup screen every time uninstall reinstall access service impractical please solve problem quickly	Negative	1	1	0
Google Play Store	51db4c38-e53e-409b-b79d-8bb2e02cccfa	The application often doesn't open and gives me a message of error in connecting to the server.	Omar M. Samir	##########			0	en	us		5	ar	application often doesnt open give message error connect server	Negative	0	1	0
Google Play Store	5d96bd50-ed41-4611-a286-6ba6d5e78713	There is a problem with the Al Ahli application. From 12 midnight to 5 am every day, transferring to other banks does not work, and the number of transfers to other banks for us is limited to only 3 transfers in 24 hours. Every time we complain to the branch or the phone banking service, no one knows anything. We have been facing this issue for over a year now. When will Al Ahli Bank have mercy o…	Abdulilah Alroshodi	##########			0	en	us		1	ar	problem al ahli application midnight every day transfer bank work number transfer bank us limit transfer hours every time complain branch phone bank service one know anything face issue year al ahli bank mercy us allow us manage personal account enable transfer us worth note account al ahli capital allow make transfer bank within hours	Negative	0	1	0
Google Play Store	cd6ffd72-a56c-40c3-81e1-a7547f2fe400	Excellent application for a leading bank	Ahmed A	##########			0	en	us		5	ar	excellent application lead bank	Positive	0	0	0
Google Play Store	761cdfca-aa4b-4735-b9f9-098df1eb399a	The worst banking application isn't working for me, and I've been trying for two days.	Hisham M	##########			0	en	us		1	ar	bad bank application isnt work ive try two days	Negative	1	1	0
Google Play Store	95620a54-260d-470e-a54a-31f3a11d6b0a	the worst	Da Da	##########			0	en	us		1	ar	bad	Negative	1	0	0
Google Play Store	ebd287dc-fb9e-4f0d-9c0d-fdb9597d342e	The application does not work, and this bank is getting worse every day, Mashallah.	Abdulmajed Gethami	##########			1	en	us		1	ar	application work bank get bad every day mashallah	Negative	1	1	0
Google Play Store	9c0e649c-37ac-47ff-8974-162bffb885f6	Excellent, fast with all the services and features.	Mohamed Abdelsalam	##########			0	en	us		5	ar	excellent fast service feature	Positive	0	0	0
Google Play Store	034ab66d-1013-4109-b9c5-c78f5adf0355	fdFG	Ishtiaq Ahmad	##########			0	en	us		5	ar	fdfg	Neutral	0	0	0
Google Play Store	e2da8826-b87d-4ae3-924e-0b2b4789c0f4	Wonderful	Mahmoud Alaßdulla	##########			0	en	us		5	ar	wonderful	Positive	0	0	0
Google Play Store	5cd1948c-0e5a-4040-8530-a92158270d51	Every time I open the application, it says "We apologize for any inconvenience caused by the unavailability of our services .."	Muaaz Danish	##########			0	en	us		1	ar	every time open application say apologize inconvenience cause unavailability service	Negative	0	1	0
Google Play Store	7cf6a024-5d11-4345-9cb9-4df32d4dfa4c	The application freezes when it comes to personal financing, and it also freezes when trying to login to the application.	montaser raaft	##########			0	en	us		5	ar	application freeze come personal finance also freeze try login application	Negative	0	1	1
Google Play Store	df7763ab-467e-47ae-aa75-30f1e3371e93	Time of need breaks down.	Mahmoud Mousa	##########			0	en	us		1	ar	time need break	Neutral	1	0	0
Google Play Store	43c880e6-fe0a-40ad-b841-4ec782d875b1	"A very bad application for me. I have been trying for two days to access my account, but the application is freezing."	Ahmad Abumaqdam	2023-08-05 07:31:00			0	en	us		1	ar	bad application try two days access account application freeze	Negative	1	1	1
Google Play Store	c7cca301-183b-4499-9bf2-bb75b3439489	The services are disastrous. Every two weeks, they ask for device registration as new, and then freeze the permissions for two days.	Abdulrhman Alhammadi	##########			0	en	us		1	ar	service disastrous every two weeks ask device registration new freeze permissions two days	Negative	1	1	1
Google Play Store	2e6b00d0-a99a-4e02-bba2-72155def0851	The worst banking application.	mt	##########			0	en	us		1	ar	bad bank application	Negative	1	0	0
Google Play Store	b3292346-ec84-41e2-8274-cdb932031dc4	He often hangs up and needs follow-up by the IT department at the university. Greetings to everyone.	MH Ghanim	##########			0	en	us		3	ar	often hang need followup department university greetings everyone	Neutral	0	0	1
Google Play Store	0dbc4e17-026f-4f22-9046-cbd136e51f1d	The worst application with a date."	Moe	##########			0	en	us		1	ar	bad application date	Negative	1	0	0
Google Play Store	5f9d52fc-f468-415c-a568-c88b36a58dbe	They resumed their partnership with urpay.	Big Boss	##########			0	en	us		1	ar	resume partnership urpay	Neutral	0	1	0
Google Play Store	4cdb996a-337d-4ee5-9aaa-3077af83078f	He is not able to access the account, it is the worstlication.	NaKa xx	##########			0	en	us		1	ar	able access account worstlication	Negative	0	1	0
Google Play Store	81dc0b3e-19bd-4264-a767-2a8d4dd0a607	fdsfs	rami mohamed	##########			0	en	us		2	ar	fdsfs	Neutral	0	0	0
Google Play Store	03e29ada-c3fb-43a0-a60c-b731ffa83328	A very capable, fast, and secure application.	Ahmed Gamer	##########			0	en	us		5	ar	capable fast secure application	Positive	0	0	0
Google Play Store	377df7c8-8df6-40c6-8bd0-12e762409052	"The slowness and frequent malfunctions are very annoying. I tried updating the app, but when I opened it, it told me to update again. I went to Google Play and it said the update was done, but when I went back to the app, it still told me to update. You really exhausted us, and what's worse is that it doesn't accept your comment unless you give it five stars, meaning the rating is mandatory."	mohamed kheledy	##########			1	en	us		1	ar	slowness frequent malfunction annoy try update app open tell update go google play say update do go back app still tell update really exhaust us whats bad doesnt accept comment unless give five star mean rat mandatory	Negative	1	1	1
Google Play Store	5927b4a5-1216-4b95-8239-5a308cd189ae	The application Mayok is extremely unsuccessful; may God destroy them.	أحمٰد	##########			0	en	us		1	ar	application mayok extremely unsuccessful may god destroy	Negative	1	0	0
Google Play Store	245470bd-ecc7-44bc-9a87-37b8f1c74291	Worse than bad 👎🏼	Mosaad Alsuhaimi	##########			0	en	us		1	ar	bad bad	Negative	1	0	0
Google Play Store	03d3ac56-c1c7-4cc0-a524-5b9cf43d2567	And no matter how hard you try, he says you're using a VPN, and every day he has a new style, a horny one. His systems have a new shape every day, a new challenge every day. You idiot, how do you serve the customer? The customer, you bull, wants a stable system that serves him, he doesn't want a teenager with a new style every day, you bull, you childish mentality. Egyptian winners, may God not g…	Coming Soon	##########			0	en	us		1	ar	matter hard try say youre use vpn every day new style horny one systems new shape every day new challenge every day idiot serve customer customer bull want stable system serve doesnt want teenager new style every day bull childish mentality egyptian winners may god grant success fail service	Negative	1	0	0
Google Play Store	d6eb130e-c933-449f-90d6-4b2147584e1f	Fdg	Akhter Hussain	##########			0	en	us		5	ar	fdg	Neutral	0	0	0
Google Play Store	319539b7-e7ab-4bb6-92c4-57167a46aece	Imagine that I cannot transfer to another bank, the money will be withdrawn to another bank that is easy to deal with.👍🏼	عمار	2023-07-05 09:06:00			0	en	us		2	ar	imagine transfer another bank money withdraw another bank easy deal	Neutral	1	0	0
Google Play Store	b57bb7eb-adb8-4307-b176-48ec5368eaa4	I can't log in to the application peacefully and it always freezes on the login screen.	its Emarancy910	##########			0	en	us		1	ar	cant log application peacefully always freeze login screen	Negative	0	0	1
Google Play Store	189d500e-0c80-4389-976c-10ccbffb3eef	I am getting a VPN notification, even though I don't have a VPN application and have not activated it from the settings. When I tried to open the account on another device, it requires authentication and correct information, but it always says it's incorrect. If there were less than a star, I would have given it 🙂.	ZM	##########			0	en	us		1	ar	get vpn notification even though dont vpn application activate settings try open account another device require authentication correct information always say incorrect less star would give	Negative	0	1	0
Google Play Store	d00d3d2f-3f75-495f-b29c-fd84dd415901	Mashallah nicely	Mohammad Shohid	##########			0	en	us		5	ar	mashallah nicely	Neutral	0	0	0
Google Play Store	4b9adac2-6176-41cd-97c5-a1552bfc9916	Very bad, and additional amounts are deducted when shopping online.	Saber Negam	##########			0	en	us		1	ar	bad additional amount deduct shop online	Negative	1	1	0
Google Play Store	b3a3ada3-e3d1-46aa-95b2-6a3bf0db55d3	From bad to worse.	Lamis Shamrani	##########			0	en	us		1	ar	bad bad	Negative	1	0	0
Google Play Store	177cf38b-3f92-4dbb-be9e-7c144cc907a8	I hate him because he is (green) and in my opinion, anything green in color is considered unsuccessful and cheap.	REEMA THE LADY	##########			0	en	us		1	ar	hate green opinion anything green color consider unsuccessful cheap	Negative	1	0	0
Google Play Store	c8e6120e-7995-4384-a113-82118b803a8f	The application has not been working for about a month and I cannot log into my account.	Abdallah Mostafa	##########			0	en	us		1	ar	application work month log account	Negative	0	1	0
Google Play Store	010fc08b-910d-4591-bd4c-567572ef4c2c	Every time a VPN sign appears activated on my screen, it should be deactivated even though there is no VPN.	Ali Mnam	##########			1	en	us		1	ar	every time vpn sign appear activate screen deactivate even though vpn	Negative	0	1	0
Google Play Store	968537b7-729c-4bc7-905d-c79fcac0b633	Very bad.. The application does not work with Huawei devices using Wi-Fi networks. It only works when using mobile data.	Yousef Ali	##########			0	en	us		1	ar	bad application work huawei devices use wifi network work use mobile data	Negative	1	1	0
Google Play Store	26b27444-4c5d-4bfd-94fb-3e7c121f519e	It is saddening that Al-Ahli bank has an application that is considered one of the dumbest bank applications. In recent years, the application has gone from bad to worse. The application is slow and mixes account data with cards. I hope they learn from applications like Al-Rajhi or Al-Jazeera.	MAHMOUD ALI	2023-06-03 09:40:00			0	en	us		1	ar	sadden alahli bank application consider one dumb bank applications recent years application go bad bad application slow mix account data card hope learn applications like alrajhi aljazeera	Negative	1	0	1
Google Play Store	e8af9f7a-4f9b-4e1f-9a7c-69f0553b7867	I can't access the program for a while.	Mohammed Al Amri	##########			0	en	us		1	ar	cant access program	Negative	0	1	0
Google Play Store	4bf19c9b-87d0-4c0c-86db-36cb70aa47b2	This new update, why does it reject privacy? The location is already open, what more do you want? I can't do anything, I just check how much is in my account and log in, then I can't do anything.	Tim Lomongo	##########			1	en	us		2	ar	new update reject privacy location already open want cant anything check much account log cant anything	Negative	0	1	0
Google Play Store	5ce7f8cb-f93d-42fa-8370-8092c65f605c	The application is broken, it keeps telling me that the VPN is not working. It is a major application throughout the kingdom and you don't know how to fix it. Al Rajhi Bank is better.	_ Nawaf _	##########			0	en	us		1	ar	application break keep tell vpn work major application throughout kingdom dont know fix al rajhi bank good	Negative	0	1	0
Google Play Store	6132d4ae-155e-461d-9d45-66853137c2f6	The application has become slow and freezing. It used to be better and faster before.	رغد عبدالخالق	##########			0	en	us		1	ar	application become slow freeze use good fast	Negative	1	0	1
Google Play Store	47e08471-f4a4-45be-92de-bdb37acc05d3	The problem with the VPN, may Allah grant you a solution swiftly.	عبدالله الناشري	##########			0	en	us		1	ar	problem vpn may allah grant solution swiftly	Neutral	1	0	0
Google Play Store	9c9d4f25-c453-4ff5-b1e0-540c703c5af2	Bad application, meaning you ask for updating data through the application and then the application itself is not usable? So you have to go to the branch to update indirectly. Anyway, your application is not useful.	A G	##########			0	en	us		1	ar	bad application mean ask update data application application usable go branch update indirectly anyway application useful	Negative	1	1	0
Google Play Store	641d7224-6b44-4462-b44f-274a2693474e	I have been unable to access the application for over a month because it keeps crashing, and it shows me that the VPN is connected.	Hassan Alzuher	##########			0	en	us		1	ar	unable access application month keep crash show vpn connect	Negative	0	1	0
Google Play Store	465ebb54-c42b-4a2c-adf7-8565c8601bf7	My opinion is that the old application was better. With the new update, I can't run it every time because it says that the phone is connected to VPN, even though I don't use VPN. Please solve the problem or allow the use of the old application. Thank you.	Yas Tech	##########			0	en	us		1	ar	opinion old application good new update cant run every time say phone connect vpn even though dont use vpn please solve problem allow use old application thank	Negative	1	1	0
Google Play Store	8d1a7b85-d862-43ec-9cb4-0e422a5505f1	The latest update is annoying and does not allow using the application through the internet (Wi-Fi) and gives a message that the device is using a VPN.	FaHaD Alrefai	##########			1	en	us		1	ar	late update annoy allow use application internet wifi give message device use vpn	Negative	1	1	0
Google Play Store	f038de20-c901-4713-8440-35fc5ed32d63	Very bad, deserves a zero out of five.	A. Kurdi	##########			0	en	us		1	ar	bad deserve zero five	Negative	1	0	0
Google Play Store	b66f05f3-ea3e-4cca-b5be-383386b1b0f1	VPN problem without any VPN software	Sherif Hammad	##########			2	en	us		1	ar	vpn problem without vpn software	Negative	0	1	0
Google Play Store	d6793ab7-230a-4563-8267-39ed3fcc11ab	A beautiful application that saves a lot of time in service speed.	Wahid Hussien	##########			0	en	us		5	ar	beautiful application save lot time service speed	Positive	0	0	0
Google Play Store	eaf6e05b-e854-4573-9360-b73359bbadd7	The application has been modified through updates since writing this review. Most of the basic services work well. Shortcomings: 1- You cannot pay off your loans (personal or real estate) through the application. 2- You cannot change or modify the names of the bank accounts used. 3- When withdrawing from or paying off the credit card, the remaining balance on the card does not update quickly and …	Nahar Alnahari	##########			0	en	us		3	ar	application modify update since write review basic service work well shortcomings pay loan personal real estate application change modify name bank account use withdraw pay credit card remain balance card update quickly sometimes take several hours update may cause delay payment fall trap excess amount	Neutral	1	1	1
Google Play Store	830b91e2-af15-43de-966c-982399451c28	What does it matter if your father is a general?	5an A	##########			0	en	us		1	ar	matter father general	Neutral	1	0	0
Google Play Store	896b8288-50c6-472e-a0bb-ad71c965770a	The application does not open in Huawei P30 due to VPN, and I do not have VPN.	Abo Elaiwy	##########			2	en	us		1	ar	application open huawei p due vpn vpn	Negative	0	1	0
Google Play Store	0ad97bbe-00e4-437e-9742-16f0243948d9	Very bad	Fahed Sawalmeh	##########			0	en	us		1	ar	bad	Negative	1	0	0
Google Play Store	d735cc9f-92fa-4da7-bd31-821168f7c1ca	The application is requesting to disable the use of VPN, knowing that I do not use this technology at all.	Amr Elgammal	##########			0	en	us		1	ar	application request disable use vpn know use technology	Negative	0	1	0
Google Play Store	883e38f5-7c73-4b6a-9bdf-ae3739e8bb54	A giant bank of this size in the region, but it has many problems in its application!	TariQ Mahmoud	##########			0	en	us		1	ar	giant bank size region many problems application	Negative	1	0	0
Google Play Store	565968d8-f78d-440c-9709-2fa670186ffd	There are errors in the program.	Adel Habib Abdulaziz	##########			0	en	us		1	ar	errors program	Negative	0	1	0
Google Play Store	1a1e8870-bd55-4106-ba73-51959451d5cd	It doesn't open with me.	Fa A	2023-05-06 08:32:00			0	en	us		1	ar	doesnt open	Negative	0	1	0
Google Play Store	f5c5269a-b1fe-4798-90e7-83a937e836f2	May Allah suffice me from your bank, both from the website and the application. You keep causing us trouble and do something that actually works.	Mralabbad	##########			1	en	us		1	ar	may allah suffice bank website application keep cause us trouble something actually work	Negative	1	1	0
Google Play Store	363e378d-1b34-4d4a-b4c6-c61b6c4a0607	One of the worst banking applications, every time you open the application it asks you to update it, most of the time it doesn't respond to transfers or bill payments. I hope the bank considers the issues with this frustrating application.	xx asthetic_roblox	##########			0	en	us		1	ar	one bad bank applications every time open application ask update time doesnt respond transfer bill payments hope bank consider issue frustrate application	Negative	1	1	0
Google Play Store	938514e8-b5fd-4e79-b7fd-2d6152aa54cf	What doesn't work?	YAHAYA ISMAIL	##########			0	en	us		4	ar	doesnt work	Neutral	0	1	0
Google Play Store	458c3c18-28af-4f09-87ec-bfde164013ec	The worst bank application, I'm trying to transfer and I can't transfer!	Naif Al-Juhani	##########			0	en	us		1	ar	bad bank application im try transfer cant transfer	Negative	1	1	0
Google Play Store	0a872837-6d91-44dc-bbb3-448ca0e57f4d	The application is very very bad ... It hasn't been working at all since a month ago, even after the update. It is evident from all the comments below that no one from the bank management cares. It is very unfortunate.	Ashraf Maher	##########			1	en	us		1	ar	application bad hasnt work since month ago even update evident comment one bank management care unfortunate	Negative	1	1	0
Google Play Store	4aee33df-a17f-4e65-8607-6d9eddce3465	Ma'sha~ALLAH is an Arabic phrase that is often used to express admiration, praise, or gratitude for something. It can be translated to English as "what God has willed" or "as God has willed."	Muhammad Irfan Sheikh	##########			0	en	us		5	ar	mashaallah arabic phrase often use express admiration praise gratitude something translate english god will god will	Positive	1	0	0
Google Play Store	d06ee0f0-81ca-4401-ad33-bdd2b6f02dbe	There is no problem.	Othman Shabi Mobaraki	##########			0	en	us		5	ar	problem	Neutral	0	1	0
Google Play Store	0ed5f9ab-d14f-4bac-981e-47aa1d1f6699	The application is frozen and it hasn't been working for over a week, and no one is responding. It has been frozen since the last update.	ahmed a	##########			0	en	us		1	ar	application freeze hasnt work week one respond freeze since last update	Negative	0	1	1
Google Play Store	0d5add15-1dad-4df7-bb7e-bf6c1d4ddca7	Stupid update, new payment invoices cannot be added after the update.	AM M	##########			0	en	us		1	ar	stupid update new payment invoice add update	Negative	1	1	0
Google Play Store	604ccbdb-3de2-41da-bda3-8968e7345293	It asks for an update every time the application is opened, despite being updated. It is a bad experience as the same problem still exists and unfortunately, the employees responsible for the mobile application do not respond to negative feedback, unlike other banks.	najeeb ghanem	##########			0	en	us		1	ar	ask update every time application open despite update bad experience problem still exist unfortunately employees responsible mobile application respond negative feedback unlike bank	Negative	1	1	0
Google Play Store	ef01ded5-46b5-420b-af64-78f8a41e2a33	Praise be to Allah, the Lord of all the worlds.	Ganiyu Atanda	##########			0	en	us		3	ar	praise allah lord worlds	Positive	0	0	0
Google Play Store	2441db51-55ff-4a36-8935-5ca655e36148	The application is not working. Only the startup screen appears without the login screen to my account. Please solve the problem as soon as possible. Note that the mobile device is Huawei P20 Pro with the operating system EMUI 8.1.0 Android CLT.	Moataz Mahmoud	##########			0	en	us		1	ar	application work startup screen appear without login screen account please solve problem soon possible note mobile device huawei p pro operate system emui android clt	Negative	0	1	0
Google Play Store	dc1e0d29-9b79-4364-9ab8-bd0fca0ed0a3	Despite the significant improvement in the application compared to its previous version, it requires frequent updates and you always have to continuously update the application. The latest update does not seem to work, perhaps because its size is large.	AlMuhsin Hamidaddin	##########			2	en	us		2	ar	despite significant improvement application compare previous version require frequent update always continuously update application late update seem work perhaps size large	Negative	1	1	0
Google Play Store	cf79a901-045a-41d8-8da3-a8d3a7f5be50	The problem of changing the interface language to English is still present every time I open the program. The back button on the mobile system is not linked to the program. I hope the program can be customized more. If you have maintenance or downtime for some services, please notify users with a text message.	Abdullah A	##########			0	en	us		4	ar	problem change interface language english still present every time open program back button mobile system link program hope program customize maintenance downtime service please notify users text message	Negative	0	1	0
Google Play Store	129c032e-8871-4e28-b437-1ce51353b548	lonely moments	MUHAMMAD HAMID	2023-04-09 06:56:00			0	en	us		5	ar	lonely moments	Negative	1	0	0
Google Play Store	fd7a80c4-04a2-4f26-9e65-a1506bb8039d	The application puts you in situations that you don't need.!!	سعيد عون	##########			0	en	us		1	ar	application put situations dont need	Negative	1	0	0
Google Play Store	b96465da-121b-4c3c-a47c-24c3b07c9ace	It refuses to complete the update.	KHALED HASHEM	2023-04-08 03:26:00			0	en	us		1	ar	refuse complete update	Negative	0	1	0
Google Play Store	8e536977-1dc1-46f6-827d-1beda222b15e	In continuous progress and better than before.	Ahmed احمد Gadi قاضي	##########			0	en	us		4	ar	continuous progress good	Positive	0	0	0
Google Play Store	e78f4777-1416-41ec-8a18-d2f1f4b87985	The leasing finance account has been showing a General Systems Error for more than 5 days now. There is no response or solution, despite performing all updates and even deleting and reinstalling the application again. To be honest, this has become very frustrating, and, God willing, a complaint will be filed with Sama (authority responsible for financial services).	Khaled El Shahawy	2023-04-07 06:26:00			0	en	us		1	ar	lease finance account show general systems error days response solution despite perform update even delete reinstall application honest become frustrate god will complaint file sama authority responsible financial service	Negative	1	1	0
Google Play Store	a3e8bbdf-cb49-4ee1-99f2-e02cfdee365b	The worst banking application, every time it asks for an update to the application.	Hussain Saigal	2023-04-07 02:15:00			0	en	us		1	ar	bad bank application every time ask update application	Negative	1	0	0
Google Play Store	515497ec-ce31-4d45-84cc-4bf87ee8817a	One of the worst versions that you released, you did not improve it, you ruined it.	Ali Abo Elghar	2023-04-07 01:10:00			0	en	us		1	ar	one bad versions release improve ruin	Negative	1	0	0
Google Play Store	3837a7d4-de78-47fc-b1cb-223bab94bdeb	The worst application from the worst bank.	MB Mvj	##########			0	en	us		1	ar	bad application bad bank	Negative	1	0	0
Google Play Store	2d5e5d7b-7144-468c-8196-da3175916505	The registered names in the transfer list have changed and now appear as stars, making it difficult to identify the person you are sending to. Please fix the problem.	rayan saleh	##########			0	en	us		1	ar	register name transfer list change appear star make difficult identify person send please fix problem	Negative	1	1	0
Google Play Store	1ac6847f-bc1d-4e47-896a-e110f55fae71	The latest update is very very very bad. The program doesn't work and it freezes on the main interface.	Gee	##########			0	en	us		1	ar	late update bad program doesnt work freeze main interface	Negative	1	1	1
Google Play Store	3ab081bf-0c4b-4ee0-80d1-740499bfc18e	The application has become bad, and the problem has been going on for a long time and is not being fixed. The issue is with opening the application and activating the beneficiaries.	mohamed anwar	##########			0	en	us		1	ar	application become bad problem go long time fix issue open application activate beneficiaries	Negative	1	1	0
Google Play Store	17dd89d3-0f36-4d15-a886-0050b363034e	After the new update, the application "Muradi" opens strangely, 😕.	Muhammad Ali	##########			0	en	us		1	ar	new update application muradi open strangely	Negative	0	1	0
Google Play Store	27b9a605-d750-4d45-877e-195b477d96fd	A bad application that forces you to update it every time you use it, almost daily.	Alaauldeen Qasem	##########			0	en	us		1	ar	bad application force update every time use almost daily	Negative	1	0	0
Google Play Store	d977c6f6-e2a8-4c41-80e2-ee3330a7b698	"I tested the application in the banks and every update is worse than the previous one."	Rkuwaity Q80	##########			0	en	us		1	ar	test application bank every update bad previous one	Negative	1	0	0
Google Play Store	c6765d0d-c239-4b90-ad79-5769bc663921	The worst bank.	rere	##########			0	en	us		1	ar	bad bank	Negative	1	0	0
Google Play Store	4c7153e8-3e38-46b6-b1d0-8e6455288db4	Restricting the password to eight elements. Confusing issue.	Husam Husein	##########			0	en	us		5	ar	restrict password eight elements confuse issue	Negative	1	1	0
Google Play Store	c3d9b25b-694e-41ab-a7d5-e3867836445f	The system always stops working after 12 o'clock at night. Is it because the employees are asleep, for example? Or what is the reason?? It has been more than three months and the bank has not found a solution to this problem. Is it possible that a bank the size of Al Ahli Bank is unable to solve the problem? Or has it reached a point where customer satisfaction no longer matters to them?	Feras B	2023-04-01 04:05:00			1	en	us		1	ar	system always stop work oclock night employees asleep example reason three months bank find solution problem possible bank size al ahli bank unable solve problem reach point customer satisfaction long matter	Negative	1	1	0
Google Play Store	fee28d59-f243-4985-810b-53b31d853cc1	There is a problem with displaying the card and its information.	Omar Tawfik	##########			0	en	us		1	ar	problem display card information	Negative	0	1	0
Google Play Store	15094fa4-02d4-4784-9a24-a38cc5023870	Al-Ahli Bank was the best Saudi bank in electronic services 10 years ago. Unfortunately, now it is the worst. The application is very slow and its problems are endless.	St. Abdullah	##########			2	en	us		2	ar	alahli bank best saudi bank electronic service years ago unfortunately bad application slow problems endless	Negative	1	0	1
Google Play Store	289736f0-afd1-418d-b27d-aed331f2b59f	"Unfortunately, it is a bad application that does not suit the name of the bank. Strange, by Allah."	Mr. Yazan	##########			1	en	us		1	ar	unfortunately bad application suit name bank strange allah	Negative	1	0	0
Google Play Store	f2f1f6f5-2237-45c9-b799-f438d67b736f	Very beautiful. But I can't see any traffic violations.	Khalil Zuwaid	##########			0	en	us		5	ar	beautiful cant see traffic violations	Positive	1	1	0
Google Play Store	febb553e-f983-4ea6-930c-8c4d1e114798	Always failed to connect to server, sad they also blocked the old Ahli app so no longer useful. It's worse, the old one was better and faster.	Zero	##########			1	en	us		1	ar	always fail connect server sad also block old ahli app long useful bad old one good fast	Negative	1	1	0
Google Play Store	1c71dbdf-c1f9-44c4-be18-cf1ef4917e66	Hello	Jej Hi	##########			0	en	us		1	ar	hello	Positive	0	1	0
Google Play Store	3fe1e2fe-a325-47e4-b11e-1f1ae0201d6d	adaD	Saddam Hussain	##########			0	en	us		5	ar	adad	Neutral	1	0	0
Google Play Store	333da358-6dc8-49ae-9462-ae374146f15e	Very bad application and a bad bank. I will soon transfer my account to Al Rajhi Bank.	Safwat Tagaldine	##########			0	en	us		5	ar	bad application bad bank soon transfer account al rajhi bank	Negative	1	1	0
Google Play Store	f9147fa0-ce26-45c7-89dc-0ebd7aa1dbac	The application services are very limited and do not exist, such as downloading account statements and displaying card numbers, among others.	abdulmajid almulhim	##########			0	en	us		1	ar	application service limit exist download account statements display card number among others	Negative	0	1	0
Google Play Store	5a076983-cc08-41f0-8d62-6596b889ca00	The update causes a problem with the application every time I open it, it crashes.	Abdullah Binmansour	##########			0	en	us		1	ar	update cause problem application every time open crash	Negative	0	1	0
Google Play Store	a432e2a2-af07-4134-a6f8-160428ce7675	There are problems in the application regarding password authentication and local and international transfers. The authentication password is received, but the password input box does not appear or an error message appears stating that there is an issue in the process or insufficient balance. The problem has worsened since the date mentioned, 21-3-2023.	Aziz Azizy	##########			1	en	us		1	ar	problems application regard password authentication local international transfer authentication password receive password input box appear error message appear state issue process insufficient balance problem worsen since date mention	Negative	0	1	0
Google Play Store	db6ac8de-07e8-414c-be11-ac6a2092b0a5	the worstlication in a nutshell... Every time I entered the password, it told me it was incorrect, even though I was a hundred percent sure it was correct. And if I logged in through the internet using the same credentials, the password worked fine. This proves that the problem lies in the faulty application.	Hayatt Aziz	##########			0	en	us		1	ar	worstlication nutshell every time enter password tell incorrect even though hundred percent sure correct log internet use credentials password work fine prove problem lie faulty application	Negative	1	1	0
Google Play Store	c809c7b6-bc5e-47bf-9710-970f7a5cb7ee	Every time I enter the application, it tells me to improve your experience, you must update the application and takes me to the store, but there is no update.	sam alazmi	##########			0	en	us		1	ar	every time enter application tell improve experience must update application take store update	Negative	0	0	0
Google Play Store	8cbf7a1f-eb94-4546-9d06-3b61db979e78	Excellent experience with the application.	Medhat Ali	##########			0	en	us		5	ar	excellent experience application	Positive	0	0	0
Google Play Store	5dd46fdb-b12e-48ab-9800-11b746eb35bc	jjh	M-ajmal Khan	##########			0	en	us		5	ar	jjh	Neutral	0	0	0
Google Play Store	213caccd-59e3-4516-bda7-0fddace05d4f	You must work on developing the application. All competitors in the market are constantly developing their applications to rely on them essentially.	MOHAMED KHAFAGY	##########			0	en	us		3	ar	must work develop application competitors market constantly develop applications rely essentially	Neutral	1	0	0
Google Play Store	84e13786-ee92-4a1f-bb58-5ee0d79e505a	Very beautiful.	ياسر محمد علي	##########			0	en	us		5	ar	beautiful	Positive	0	0	0
Google Play Store	bd0a3d3e-808e-47a5-9fce-d3282c17cdd4	The application is trash, just like the bank.	BASKiN ّ	##########			0	en	us		1	ar	application trash like bank	Negative	1	0	0
Google Play Store	470d76c7-c9aa-488d-a370-4b03a4994bd1	Very slow and the transfer processes are complicated.	Mohamed Kheledy	##########			0	en	us		1	ar	slow transfer process complicate	Negative	1	0	1
Google Play Store	28841948-3dc6-427c-b284-8d1c168e3d86	Very excellent, I wish you success and prosperity. I switched from Al Rajhi to Al Ahli bank due to the quality of services. Thank you very much.	Mubbashar	##########			0	en	us		5	ar	excellent wish success prosperity switch al rajhi al ahli bank due quality service thank much	Positive	0	0	0
Google Play Store	058b949b-49f5-44e7-b80e-ecc245d974d0	Easy to deal with and reliable	Dr. Magid Diab	##########			0	en	us		5	ar	easy deal reliable	Positive	0	0	0
Google Play Store	20ad4a28-edff-467b-9d93-47e5979ac07e	Very, very, very, very, very bad. For the second time, the worst bank ever, they don't even know how to communicate with you. They close all the phone lines, so you have to come in and create a scene in the middle of the place, just like every time, so your matters can progress.	Alla Elshaikh	##########			0	en	us		1	ar	bad second time bad bank ever dont even know communicate close phone line come create scene middle place like every time matter progress	Negative	1	0	0
Google Play Store	25526c60-d399-4419-ac9c-56dded4930b0	Problem in the latest update, I am unable to perform any transfers.	Omar Abdullah	##########			0	en	us		1	ar	problem late update unable perform transfer	Negative	0	1	0
Google Play Store	1a19c428-6113-4bfa-8847-6760bc8279cc	Praise be to Allah	Omer Azaz	##########			0	en	us		5	ar	praise allah	Positive	0	0	0
Google Play Store	00a3ced8-5de1-480e-8907-022928acb79b	Good	Muhammad Ahsan Ali	##########			0	en	us		5	ar	good	Positive	0	0	0
Google Play Store	18bdebd2-9622-4976-84e0-e947eda52bd4	Activation of a very disabled beneficiary. The activation confirmation code message does not arrive.	FAHAD ALBALAWI	##########			0	en	us		1	ar	activation disable beneficiary activation confirmation code message arrive	Negative	0	1	0
Google Play Store	e514d4b7-42bf-4a3e-b85b-0ec5bcc7eba9	The application is reeeally bad, sometimes it gets on my nerves, sometimes it works fine, and sometimes it freezes and refuses to process transactions or function properly. 🤬🤬	jwahier Almulhim	##########			1	en	us		1	ar	application reeeally bad sometimes get nerve sometimes work fine sometimes freeze refuse process transactions function properly	Negative	1	1	1
Google Play Store	e0ab3d8f-ed28-4c59-9937-93526e27c351	The new update is very bad.	حسن بالحارث	##########			0	en	us		1	ar	new update bad	Negative	1	0	0
Google Play Store	854a5b3c-0f8a-4fa8-b690-7789efed3842	Time-wasting application	nerd king	2023-03-06 07:45:00			0	en	us		1	ar	timewasting application	Negative	0	1	0
Google Play Store	c3c2360c-c9d2-4d26-ab9f-2f5bce4ae438	Bad application, I changed my phone and the verification message does not arrive on my phone, and customer service employees did not solve the issue with their suggestions.	Ahmed AL-muslem	##########			0	en	us		1	ar	bad application change phone verification message arrive phone customer service employees solve issue suggestions	Negative	1	1	0
Google Play Store	e09c416d-2aa8-4a58-9fd0-36fd9abbd5b5	The old version is better.	Mohammed Salaghur	##########			0	en	us		1	ar	old version good	Positive	1	0	0
Google Play Store	e1b4f94b-71b6-4c7e-b0f8-95c15567c260	hgh	Husam jon	##########			0	en	us		5	ar	hgh	Neutral	0	0	0
Google Play Store	7189f07e-e841-4f14-b423-a87116bf1858	Great, I recommend it.	eldaw hassan	##########			0	en	us		5	ar	great recommend	Positive	0	0	0
Google Play Store	59631d48-9e4e-4d72-9fc9-2007b72c0dcd	After my experience with 4 different banks, Al Ahli Bank and their application have the worst online services. The app got stuck for me at the verification step where they call me and tell me to press 1 for verification. No matter how many times I press it, it doesn't accept, and in the end, the call gets disconnected. Unfortunately, online services are one of the most important things in any ban…	Ro S94	##########			0	en	us		1	ar	experience different bank al ahli bank application bad online service app get stick verification step call tell press verification matter many time press doesnt accept end call get disconnect unfortunately online service one important things bank experience close account al ahli bank benefit	Negative	1	1	1
Google Play Store	c8574775-9650-469f-b510-48caef5c6d2d	Always when I try to make a transfer, it says that your balance is insufficient, even though the balance is sufficient.	Steiner Kanzaki	##########			0	en	us		1	ar	always try make transfer say balance insufficient even though balance sufficient	Negative	1	1	0
Google Play Store	cc14d9f7-e864-4fc7-a496-a5e1f969a99c	Masha Allah.. Al-Ahli application is constantly evolving.	يعقوب القبيشي	##########			0	en	us		5	ar	masha allah alahli application constantly evolve	Positive	1	0	0
Google Play Store	5b70b94c-4e2d-4f85-97d9-e1cae79eef92	Why force constant updates for a the worst application?	mohamed mraghy	##########			0	en	us		1	ar	force constant update bad application	Negative	1	0	0
Google Play Store	19fa42c3-f4ad-4ec7-8294-8c8aeca88076	Enter my login information and the process does not complete. It hangs for a long time in this state and does not work even after updating it.	Faisal AL-Maiman	##########			0	en	us		1	ar	enter login information process complete hang long time state work even update	Negative	0	0	1
Google Play Store	dda6704d-d918-47f9-b6be-c83c5289193a	I am trying to log into the application, but when I enter the username and password, a code message appears. After entering it, the login screen continues and I cannot access the account.	mmasa mma	##########			1	en	us		1	ar	try log application enter username password code message appear enter login screen continue access account	Negative	0	1	0
Google Play Store	ede02830-e213-49ee-bacd-628fbf050db1	The application does not work on Honor 70 phone. Every time I enter the activation code, it takes me back to the registration page.	abdallah q	##########			0	en	us		1	ar	application work honor phone every time enter activation code take back registration page	Negative	0	1	0
Google Play Store	b73697e1-2848-4082-a30a-0f3229d4157a	Every time an update is needed, what is the problem?	anas ali	##########			0	en	us		1	ar	every time update need problem	Neutral	0	1	0
Google Play Store	4cbdf57a-ad67-4af3-a978-b6a64f45985d	The worst thing is when one cannot make any transfer after 12 o'clock! We had an emergency situation and we couldn't transfer the amount!	Afnan G	##########			0	en	us		1	ar	bad thing one make transfer oclock emergency situation couldnt transfer amount	Negative	1	1	0
Google Play Store	9a2a701f-1857-4a90-87a7-41d892717673	The exchange office took money from me and returned it after ten days... Excellent employees at the Al Nahda branch.	Klai Nabiha	##########			0	en	us		5	ar	exchange office take money return ten days excellent employees al nahda branch	Positive	1	0	1
Google Play Store	a7a077f2-4b77-447a-824c-da0cbf5c7d72	I always hope that maintenance will take care of the branches every time I go and find the machine stopped.	mouhamad arrag	##########			0	en	us		1	ar	always hope maintenance take care branch every time go find machine stop	Neutral	1	0	0
Google Play Store	53be1e57-4e6e-41f6-9ed3-b1e020b84aac	One of the worst banking applications. The interface of the application looks old and not user-friendly. The application itself is slow when loading. There are no additional services like other applications.	Mohammed Elhassan Habiballa	##########			0	en	us		2	ar	one bad bank applications interface application look old userfriendly application slow load additional service like applications	Negative	1	0	1
Google Play Store	a523fa1c-f28c-414e-b9fd-93a53d3c9095	You are killing us with useless updates all the time.	اديب الميرابي	##########			0	en	us		1	ar	kill us useless update time	Negative	1	0	0
Google Play Store	0e77a4fb-3b11-4712-9512-d6839bf2c94a	After the new update, it's so so so so so bad. It requires an update every day and the service is bad.	علاء العسلي	##########			0	en	us		1	ar	new update bad require update every day service bad	Negative	1	0	0
Google Play Store	08049deb-5501-4abe-b8ba-5d700cce45b5	The update is very slow/tired.	Hamza Bourechka	##########			0	en	us		1	ar	update slowtired	Negative	0	0	1
Google Play Store	85127146-34df-489c-8726-1eb2a82a3785	After the update, it works well and the interface is better and superior to the old version. Thank you snb.	Amr Zaied	2023-02-02 07:11:00			0	en	us		4	ar	update work well interface good superior old version thank snb	Positive	0	0	0
Google Play Store	c644c934-5f15-4d37-9cfa-ef3a497cec95	The application works for the first time after downloading. However, on the second time, it stops at the Ahli Bank logo.	Abdulrahman Balkhair	2023-02-02 07:04:00			0	en	us		3	ar	application work first time download however second time stop ahli bank logo	Neutral	0	1	0
Google Play Store	e559e962-48e2-43b5-a868-b308a3321d56	Unfortunately, it's bad.	Sultan Hennawi	##########			0	en	us		1	ar	unfortunately bad	Negative	1	0	0
Google Play Store	cee73b84-ead1-4775-b5c2-6376904a3cad	I am not being registered for logging in!! The old application is better than it.	Sponge Bob	##########			0	en	us		1	ar	register log old application good	Negative	1	1	0
Google Play Store	a377f67d-221a-47ce-8477-18a2cfaf3d2e	XVXV	Assaf Hamza	##########			0	en	us		2	ar	xvxv	Neutral	0	0	0
Google Play Store	55fdcc13-dd7b-4112-8521-4650dbd23331	Bad application, hanging all day, and bad bank in general.	BuAli	##########			0	en	us		1	ar	bad application hang day bad bank general	Negative	1	0	1
Google Play Store	b91c03cb-63a6-465e-8b95-b51b65848940	Excellent, safe, and very comfortable experience.	Abdulaziz abed	##########			0	en	us		5	ar	excellent safe comfortable experience	Positive	0	0	0
Google Play Store	e49a0402-4246-437d-8f08-d74531358937	An amazing application	Hisham Osman	##########			0	en	us		5	ar	amaze application	Positive	0	0	0
Google Play Store	f557006e-4f6b-4e0e-b8aa-f9ad8aa08e12	"Masha Allah tabarak Allah, the best and one."	Muhammad Imran	##########			0	en	us		5	ar	masha allah tabarak allah best one	Positive	0	0	0
Google Play Store	822b9f02-5ab3-4f73-adce-68f69f3898ca	The worst banking application. Adding a customer to Al-Ahli Bank is considered impossible; it fails 4 or 5 times and cannot be added. Complaints cannot be submitted because of the application, as if the application is excellent and there is no need to complain about it. The bank needs to reassess the application, regardless of its appearance and colors. It used to be the best application and has …	hamza kmas	##########			0	en	us		1	ar	bad bank application add customer alahli bank consider impossible fail time add complaints submit application application excellent need complain bank need reassess application regardless appearance color use best application become one bad applications	Negative	1	1	0
Google Play Store	47fe0b76-faa5-4757-b5fd-9c2fe35bf4ba	You always have problems and many issues. You also delete bills from the account as you please. My transfer was sent since 1 pm yesterday and has not reached the recipient until now, which is 10:53 am today. Your live chat service is disabled, as well as the electronic complaint service. Honestly, it's a losing bank. If I don't pay today, who will be responsible for the late fee? 😡 Frankly, it's …	Watch Live Play	##########			0	en	us		2	ar	always problems many issue also delete bill account please transfer send since pm yesterday reach recipient today live chat service disable well electronic complaint service honestly lose bank dont pay today responsible late fee frankly time switch al rajhi bank	Negative	0	1	0
Google Play Store	e678b99f-ec56-43f2-8840-ff7c58fa2512	Brother, I don't know if you blame the application or the bank itself. It's already 2023 and you still have to go to the bank and wait for hours to update your data, and it doesn't accept it through the application! Other banks update automatically or through the application, but this bank, I have no comment honestly.	waleedn900	##########			0	en	us		1	ar	brother dont know blame application bank already still go bank wait hours update data doesnt accept application bank update automatically application bank comment honestly	Negative	1	1	0
Google Play Store	bfbd4481-d36a-4040-a09e-8cc4e02f3a4b	Cool, always. Thank you.	ACTIVE FAHAD	##########			0	en	us		5	ar	cool always thank	Positive	0	0	0
Google Play Store	8711ac80-3129-445c-b50e-4196b71da0b8	Every day, there is a repetitive update that becomes annoying.	M K	##########			0	en	us		2	ar	every day repetitive update become annoy	Negative	1	0	1
Google Play Store	98a6afb1-d28a-4392-a122-314bff514327	"Terrible, I wish the old application would come back. It is a bad user experience and whenever I try to use the application, it either freezes on the home screen or gives me an error. After using it for two months, it has become even worse. How is the rating 4.8 when all the comments are negative?"	s s	##########			0	en	us		1	ar	terrible wish old application would come back bad user experience whenever try use application either freeze home screen give error use two months become even bad rat comment negative	Negative	1	1	1
Google Play Store	083e5485-dd55-409f-9f84-edaef3100f1b	Very, very bad update. The application is not working and does not open at all. Please reconsider the update and restore the application to its normal state.	Mido 24	##########			0	en	us		1	ar	bad update application work open please reconsider update restore application normal state	Negative	1	1	0
Google Play Store	7fbcc9a9-5945-49ca-a953-d7a9f88af32d	The program requests an update every time.	Samil Smith	2023-01-04 06:05:00			0	en	us		2	ar	program request update every time	Neutral	0	1	0
Google Play Store	2a66e041-2c86-4737-b9c0-87dd3f118bfa	Bad and stuck	Narcissistic	##########			0	en	us		1	ar	bad stick	Negative	1	0	1
Google Play Store	3a42a143-d2b2-422d-94c5-138dce55180b	The application is bad. Some conversion operations are not done through it and I cannot update the data using it. Please improve it.	Ghaidaa Al-ahmadi	2023-01-02 04:19:00			0	en	us		1	ar	application bad conversion operations do update data use please improve	Negative	1	1	0
Google Play Store	4ed3bf54-5f42-4429-861a-17404c7ec17e	There are many problems with it, and I prefer the old application.	mohamed ali	##########			0	en	us		1	ar	many problems prefer old application	Negative	1	0	0
Google Play Store	b8cae221-d2df-4add-9c6a-c79f6fc7788b	This is a very frustrating application that works once and crashes 10 times. It's really a shame that their application is like this.	Qusai	##########			0	en	us		1	ar	frustrate application work crash time really shame application like	Negative	1	1	1
Google Play Store	66ce5ca2-81c1-4adb-ac3b-b79c006d15c9	Very bad application, humble and does not even provide the simplest services.	Waleed Fathi	##########			0	en	us		1	ar	bad application humble even provide simple service	Negative	1	0	0
Google Play Store	1bb59438-1d99-4dda-af94-cb04fadc72c1	👎 Even the PIN number can't be displayed, and it's very slow and balances are not updated quickly.	Bandar ALSaleem	##########			0	en	us		1	ar	even pin number cant display slow balance update quickly	Negative	0	1	1
Google Play Store	4c186d8e-2e2d-4b7c-b524-5025f0382312	Very unsuccessful. It refuses to log in and the password is too short, it doesn't allow you to write it completely. Like your password has 13 characters and the application only allows 10, how is that possible?	Abo Khalid	##########			0	en	us		1	ar	unsuccessful refuse log password short doesnt allow write completely like password character application allow possible	Negative	1	1	0
Google Play Store	bf5a9b8f-ecf4-4922-9a10-7913ba14f0be	I wish the integration had not been completed, everything has become stuck and there are more mistakes with each update.	Abdullah Alhumaid	##########			0	en	us		3	ar	wish integration complete everything become stick mistake update	Negative	1	0	1
Google Play Store	fae8fc38-212d-4b4f-bdcc-ab47a01d8e83	Due to the confusing lemon tab, accessing requires searching for the window you want.	AlMazaheef Ka	##########			0	en	us		3	ar	due confuse lemon tab access require search window want	Neutral	1	1	0
Google Play Store	491a800f-6b69-4287-9106-1a9e03262773	"Rubbish, it comments."	Hrjt Jehrh	##########			0	en	us		1	ar	rubbish comment	Negative	1	0	0
Google Play Store	485f209b-8ecd-4b32-854a-c4857eb47297	The latest update is the worst, and every time I have to delete the application and download it again.	Mr. Raed Mohammed	##########			0	en	us		1	ar	late update bad every time delete application download	Negative	1	0	0
Google Play Store	d184c274-3b3c-4cca-a9aa-1d014a9ddb7e	Okay	Abdullah Nasir	##########			0	en	us		4	ar	okay	Positive	0	0	0
Google Play Store	5528ed56-59a8-4974-94c8-ea7afca5bd38	He is hesitant and very slow.	rakan al-joodi	##########			0	en	us		2	ar	hesitant slow	Negative	0	0	1
Google Play Store	025214c8-88a4-49ef-aba9-c430ea319329	Bad and in need of development.	AWAD AL QADY	##########			0	en	us		1	ar	bad need development	Negative	1	0	0
Google Play Store	4cbefaa1-d403-4c67-a925-3d85aa059071	I thank Alahli Bank Saudi Arabia for their commitment to developing their electronic services, including the Alahli app. The app is excellent and works properly. I highly recommend it.	Marwan Almasri	##########			0	en	us		5	ar	thank alahli bank saudi arabia commitment develop electronic service include alahli app app excellent work properly highly recommend	Positive	0	0	0
Google Play Store	66d63b41-24f3-45e4-a82d-e264a55046b1	Always hangs and doesn't work.	NASEER ALKIDIWI	##########			0	en	us		1	ar	always hang doesnt work	Negative	0	1	1
Google Play Store	8b80aa5e-cc11-489d-ac6f-6fd09d15f9c3	The application is currently freezing and not loading.	Abdulrahman Bawazir	##########			0	en	us		1	ar	application currently freeze load	Negative	0	1	1
Google Play Store	17c5a049-283f-450f-b4ef-5588dafee6af	Inactive, unfortunately.	Dr. M B	##########			0	en	us		1	ar	inactive unfortunately	Negative	0	1	0
Google Play Store	cb80c6f8-b1f4-417d-90fc-4f0da16caa06	The new update for the app is very bad, it takes a long time to open and it hangs a lot. The first one was much better :(	maha Aj	##########			0	en	us		1	ar	new update app bad take long time open hang lot first one much good	Negative	1	0	1
Google Play Store	7c9874aa-074e-4009-af96-5840209813be	You cannot recharge the mobile balance.	Ahmed Ba-Jubair	##########			0	en	us		1	ar	recharge mobile balance	Neutral	0	0	0
Google Play Store	e3287bf2-afb7-46f0-9191-f77ddeaf342f	The application is very bad after the latest update and does not open easily...	Waleed وٌلَيّےـدُ	##########			0	en	us		1	ar	application bad late update open easily	Negative	1	1	0
Google Play Store	2b1bfd6f-6aa7-4819-89da-199960c748f9	Bad application, it's not opening for me.	engineer gaming	##########			0	en	us		1	ar	bad application open	Negative	1	1	0
Google Play Store	eeee812a-d2c3-486e-9e0a-e7c899892044	Very bad.. Why aren't you fixing the program? You have enough disregard for the customers... What kind of bank is this that doesn't know how to create a program to keep our money safe with them?	mohammed khatib	##########			0	en	us		1	ar	bad arent fix program enough disregard customers kind bank doesnt know create program keep money safe	Negative	1	0	0
Google Play Store	404948ce-1234-4a87-a021-8bf28a6bf163	The application after the recent update is very bad, slow, and frequently disconnects when logging in. Please solve the problem.	Raheeb Shadeed	##########			0	en	us		1	ar	application recent update bad slow frequently disconnect log please solve problem	Negative	1	0	1
Google Play Store	36e39983-e19c-428d-a38f-d6333cf885ba	After the recent update, opening the application has become very slow and it takes a long time to log into the account.	Tar Tar Tar	##########			0	en	us		1	ar	recent update open application become slow take long time log account	Negative	0	0	1
Google Play Store	4d9b1539-b239-4e44-974e-7d09a2ed96df	I don't know what your problem is, but for two months I haven't been able to access the application except through the store. Every time I try to open the application, it says it needs an update, and if I go to the store, I find it updated. The second thing is that it has become very slow and doesn't work constantly. Not even one star is worth it.	nidal h	##########			0	en	us		1	ar	dont know problem two months havent able access application except store every time try open application say need update go store find update second thing become slow doesnt work constantly even one star worth	Negative	0	1	1
Google Play Store	64acedc9-48b1-4f10-9bf6-1185e289ac30	After the latest update, the application no longer opens, it only shows a loading screen. Before the update, it used to freeze a lot. I hope you work on improving the quality, speed, and servers of the application. Thank you.	Shaban Ayyat	##########			0	en	us		1	ar	late update application long open show load screen update use freeze lot hope work improve quality speed servers application thank	Negative	0	1	1
Google Play Store	2d27c5a2-84a7-410b-be18-1b65b77fc9be	Like shit	Hamza Khattaby	##########			0	en	us		1	ar	like shit	Negative	1	0	0
Google Play Store	3c86fccf-d1d5-476d-86fc-e4a774c8a699	It is being delayed a lot.	Hussien Al-sska	##########			0	en	us		2	ar	delay lot	Negative	0	0	1
Google Play Store	627d70d0-10d2-481a-970b-d285e23b2659	It is bad and everything he has becomes worse. What is happening to you?	SAUD AWWAD	##########			0	en	us		1	ar	bad everything become bad happen	Negative	1	0	0
Google Play Store	8a903b8f-e51e-420d-ae14-de7bb0c16e03	The worst application in Saudi Arabia.	hamad alsaeed	##########			0	en	us		1	ar	bad application saudi arabia	Negative	1	0	0
Google Play Store	3b860321-eeef-4b8b-91b0-01f96b605fb0	hangs	Wabel Khalil	##########			0	en	us		1	ar	hang	Neutral	0	0	1
Google Play Store	0069f302-b84c-4d45-9f60-5fb3e9ad4014	This is a very, the worst application. Every update it crashes, and every time it hangs. I will switch to another bank because of this terrible program. You have disappointed me greatly.	Mr.F	##########			0	en	us		1	ar	bad application every update crash every time hang switch another bank terrible program disappoint greatly	Negative	1	1	1
Google Play Store	b224cb6e-28bb-4110-b82c-dfcaee59be11	There is a problem every time I open the program, it gives me a new update. And when I enter the update, it turns out that it is already updated and must have entered through the market.	Yahya H	##########			0	en	us		3	ar	problem every time open program give new update enter update turn already update must enter market	Negative	0	1	0
Google Play Store	29db382a-d606-46e2-8a5f-f3305d1a48d3	Slow and old version is much better	hussain alfenis	##########			0	en	us		1	ar	slow old version much good	Positive	0	0	1
Google Play Store	ec62ebe1-c80b-4d35-ac3a-0169ec3fe110	Good.	drj malrida	##########			0	en	us		5	ar	good	Positive	0	0	0
Google Play Store	1fd928b0-0d82-4199-9536-ffcbb215f0e5	The application is not working.	Jazem	##########			0	en	us		1	ar	application work	Negative	0	1	0
Google Play Store	bb4855a7-0f4f-4f8e-bbb6-b4bb46e02f61	A bad application that always crashes, and the card always has a problem when paying unlike other banks.	Logistics	##########			0	en	us		1	ar	bad application always crash card always problem pay unlike bank	Negative	1	1	0
Google Play Store	902cf83c-648f-4a83-9351-7de4e860a47b	One of the worst days ever for Al-Ahli Bank... It is best to avoid depositing any amounts in its account until the issues of this bank are resolved... I expect that they will need a very long period of time due to their technical errors.	حساب احتياطي	##########			0	en	us		1	ar	one bad days ever alahli bank best avoid deposit amount account issue bank resolve expect need long period time due technical errors	Negative	1	0	0
Google Play Store	404f5e1e-7a6a-464d-858c-1e397ec0ab82	The worst banking application I have ever seen in my life.	Qais Qahwaji	##########			0	en	us		1	ar	bad bank application ever see life	Negative	1	0	0
Google Play Store	e7577071-f366-4012-a884-4b2996b428ab	There is a problem.	yaser ali	##########			0	en	us		5	ar	problem	Negative	0	1	0
Google Play Store	35ef3208-117e-4ec7-87e0-ec719901d9e6	Garbage	Bader Ahmad	##########			0	en	us		1	ar	garbage	Negative	1	0	0
Google Play Store	8b76264f-49b8-445b-b3aa-b9b15bc5ec61	Very bad	Safi Bawazir	##########			0	en	us		1	ar	bad	Negative	1	0	0
Google Play Store	0fa254a2-1b5b-4ef6-9adf-572ce10e9d79	Waleed Al-Sharif	Waleed Alshrief	##########			0	en	us		2	ar	waleed alsharif	Neutral	0	0	0
Google Play Store	50578449-e1ae-483b-aa3b-ea97ffbc102e	The application has become worse after its update, it does not work properly, any operation displays an error message! It is slow and only accepts Jazzin and does not accept fingerprint. The old application is much better.	Brian Moussalli	##########			0	en	us		1	ar	application become bad update work properly operation display error message slow accept jazzin accept fingerprint old application much good	Negative	1	1	1
Google Play Store	efee0f83-5de0-40fa-b5a6-685e8bf7cbd8	The worst application in the world and a stupid bank.	majed hamoh	##########			0	en	us		1	ar	bad application world stupid bank	Negative	1	0	0
Google Play Store	7d757974-dac7-47c4-97c3-12f7e78efb47	After the update, it is not good and very slow.	Ehab El-Hosary	##########			0	en	us		1	ar	update good slow	Negative	1	0	1
Google Play Store	215d9a53-a6a4-4dba-ac5d-4e20651983ed	The worst version of this program was updated today. It is very heavy on the device, freezes, and gives errors in some banking operations. The option to donate to charities no longer provides details about accounts, such as endowment, charity, and others. Even finding the option to pay fines is no longer easy. I consider this version to be the worst and cumbersome, and the developers should rever…	Saleh Saleh	##########			0	en	us		1	ar	bad version program update today heavy device freeze give errors bank operations option donate charities long provide detail account endowment charity others even find option pay fin long easy consider version bad cumbersome developers revert back old version year two ago much good	Negative	1	1	1
Google Play Store	534af50b-ac00-45ee-a055-071a647573c7	Broken piece of meat, mended with tenderness. 🥩🥩	HarryScott	##########			0	en	us		1	ar	break piece meat mend tenderness	Neutral	1	0	1
Google Play Store	d6e8b9e8-0c7b-4606-8712-88b38220110d	the worstlication, the old version is better than it.	KHALID ALAKHRASH	##########			0	en	us		1	ar	worstlication old version good	Negative	1	0	0
Google Play Store	88879973-90d6-488f-add1-1a8d38d988ec	Very bad, always freezing operations, there is an error in execution, it needs to be repeated multiple times until the operation is completed. It wastes time and is boring. The balance doesn't update at the same time after a transfer or payment. The old version was better.	HUSSAIN KHAMIS	##########			0	en	us		1	ar	bad always freeze operations error execution need repeat multiple time operation complete waste time bore balance doesnt update time transfer payment old version good	Negative	1	1	1
Google Play Store	e24175f3-db2a-4e6b-88ea-e5ce198acdf6	The new update is bad. Every now and then, it logs me out or causes a problem with registration. Also, the interface is not as user-friendly as the previous one.	ETHWIR	##########			0	en	us		1	ar	new update bad every log cause problem registration also interface userfriendly previous one	Negative	1	1	0
Google Play Store	084cff4f-3715-4140-9b10-52a34c243361	This application is stupid. Every time you enter it, you have to update it. When you come to update, it tells you to open the application. It's a waste of time.	Mohamed Tijany	##########			0	en	us		2	ar	application stupid every time enter update come update tell open application waste time	Negative	1	0	1
Google Play Store	3ea09944-5c9a-492b-9360-5329f2e15b08	The previous application was much better.	Husain Al-Haboubi	##########			0	en	us		1	ar	previous application much good	Positive	1	0	0
Google Play Store	27063904-566b-435c-bc7d-e70f61acd159	Baptism within the application no longer appears when converting using the token.	Mostafa Mansour	##########			0	en	us		2	ar	baptism within application long appear convert use token	Neutral	0	1	0
Google Play Store	5ed6ad3c-6189-4835-aba1-c5884bb2feb7	The application is not working and it is not showing on my page.	Jamal Alem	##########			0	en	us		1	ar	application work show page	Negative	0	1	0
Google Play Store	8d6c04ad-cb76-4584-85b9-f3394a353fa8	Trash application and failed/dead	Ahmed Al-labban	##########			0	en	us		1	ar	trash application faileddead	Negative	1	1	0
Google Play Store	87a8d6f6-9644-4aad-8b60-060b7d80e1e2	The worst and they reverted back to the old application.	Shereen Adel	##########			0	en	us		1	ar	bad revert back old application	Negative	1	0	0
Google Play Store	708e5a90-116c-4062-a3f9-2ee8c5e91302	The internet services have become extremely bad.	ABDULRHMAN SAIMALDHER	##########			0	en	us		1	ar	internet service become extremely bad	Negative	1	0	0
Google Play Store	b7b42a36-19a4-4b77-8e9f-abf793acf51c	The worst application	ابو تركي	##########			0	en	us		1	ar	bad application	Negative	1	0	0
Google Play Store	006822ba-6406-42b7-b91f-461d6cf8e4bf	Every now and then I register my mobile phone and I can't transfer, the worst update.	ValiantGeoDuck	##########			0	en	us		1	ar	every register mobile phone cant transfer bad update	Negative	1	1	0
Google Play Store	0157fa7b-cad2-4b1b-94ea-72a7cc6d7c45	One star only for writing the comment. If possible, this app doesn't even deserve zero stars. It is the worst bank application with many bad features that are not available, such as authenticating transfers with notes. The app switches from Arabic to English and doesn't remember the language. The old version was better; this update is the worst and not for the better.	Doha Daftardar	##########			0	en	us		1	ar	one star write comment possible app doesnt even deserve zero star bad bank application many bad feature available authenticate transfer note app switch arabic english doesnt remember language old version good update bad good	Negative	1	0	0
Google Play Store	3ddc8061-3f9e-4fb3-8703-c7e2e2259772	"Very bad application, the worst bank application in Saudi Arabia. It opens slowly, complicated to use, and there is a new update every two days, and each update is worse than the previous one."	m blal	##########			0	en	us		1	ar	bad application bad bank application saudi arabia open slowly complicate use new update every two days update bad previous one	Negative	1	0	1
Google Play Store	ccf9126d-98ca-4853-8be8-0dba758531a4	The documentation was removed by Al Ahli Token for financial operations. Why am I keeping my money with you if we no longer need your service if you cancel it?	Green Tea	##########			0	en	us		1	ar	documentation remove al ahli token financial operations keep money long need service cancel	Negative	0	1	0
Google Play Store	89159a02-c9e6-44f5-9fb7-1d297e01dad1	"It lasts for a long time."	Yahya Gas	##########			0	en	us		1	ar	last long time	Neutral	0	0	1
Google Play Store	3b212951-c463-4191-9375-3200dcc7c10e	The new update is very bad, extremely slow.	سليم المشعبه	##########			0	en	us		1	ar	new update bad extremely slow	Negative	1	0	1
Google Play Store	0258caf1-e2e9-4c89-9922-92d817697a19	Peace be upon you, my dear Al Ahli Bank. Al Ahli Bank is a well-known name in the banking sector and I used to have an account with Al Rajhi Bank previously. The bank's services were very good and connected to an intelligent banking system. I would love to have an account again with your bank in the future. Thank you, and best wishes and prayers. Thanks to the Al Ahli team.	Bilal Shahzad	##########			0	en	us		5	ar	peace upon dear al ahli bank al ahli bank wellknown name bank sector use account al rajhi bank previously bank service good connect intelligent bank system would love account bank future thank best wish prayers thank al ahli team	Positive	0	0	0
Google Play Store	34e49d43-8e34-4372-b704-17029ca2fea2	Every time an update is requested.	Eslam Elameen	##########			0	en	us		1	ar	every time update request	Neutral	0	1	0
Google Play Store	fc5f406d-e8f7-4f9f-bcdd-c31fe12f7c87	Slow and full of problems and always encountering an error in the service, and the customer number registered in the program is not operational.	Hashem Al.attas	##########			0	en	us		1	ar	slow full problems always encounter error service customer number register program operational	Negative	0	1	1
Google Play Store	51390ae6-d244-4463-88f9-da85231eaf7c	The application is very bad.	Mohammed Alshehri	##########			0	en	us		1	ar	application bad	Negative	1	0	0
Google Play Store	7cdd52d3-b64d-4b88-823f-3bce319cb614	The application does not open easily, I need to download it several times for it to open. Please solve the problem.	fow almorai	##########			0	en	us		1	ar	application open easily need download several time open please solve problem	Negative	0	1	0
Google Play Store	cf7bc194-46a5-43b5-b244-0be4471a1acc	After the last update, the application started asking for updates every time and only opens through Google Play.	Nasser Alresaini	##########			0	en	us		1	ar	last update application start ask update every time open google play	Neutral	0	1	0
Google Play Store	ad7ca449-5956-4937-bf2b-205d2c8b6b0b	The application doesn't work.	Mysore Osman	##########			0	en	us		1	ar	application doesnt work	Negative	0	1	0
Google Play Store	44579fa7-93d9-40de-9bc4-1073f1da33c9	Very bad, it's not working most of the time.	RAGAB Hatem	##########			0	en	us		1	ar	bad work time	Negative	1	1	0
Google Play Store	9d15d2b8-a945-42ae-b907-518e5586fb86	The application is really bad, it always freezes and doesn't work. I always have to uninstall it and download it again. 👎	N. H	##########			0	en	us		1	ar	application really bad always freeze doesnt work always uninstall download	Negative	1	1	1
Google Play Store	3c354265-d41e-4c87-a1fb-a7951810a035	He always asks for an update even though it is updated, and it takes a long time to open.	Mohaned Sayed	##########			0	en	us		1	ar	always ask update even though update take long time open	Negative	0	1	1
Google Play Store	06323d8a-ad63-4ff3-a306-53171dc96024	The application only works the first time. It is useless!	H M	##########			0	en	us		1	ar	application work first time useless	Negative	1	1	0
Google Play Store	65ceeeaf-4ced-4599-bbc5-e1d0f7c23289	Slow and always lagging, and Al-Ahli services always have a problem.	Saud Alfulayt	##########			0	en	us		1	ar	slow always lag alahli service always problem	Negative	0	0	1
Google Play Store	f6ab5f1c-7539-4812-a13b-362bf4d0f1d2	The application is very bad and always crashes... It is not befitting of a big bank.	sennar sudan	##########			0	en	us		1	ar	application bad always crash befit big bank	Negative	1	1	0
Google Play Store	68e52a23-3f3c-450a-8501-74b05fb8abba	But the previous program that was mentioned before was much better.	Heba Hamed	##########			0	en	us		1	ar	previous program mention much good	Positive	1	0	0
Google Play Store	9cb5f802-e723-48cb-955b-e680c3fb5e8d	The application doesn't work, I wish they hadn't updated it. It was better before, now it has become useless and unfortunately the old version doesn't work either.	Fatema Alseni	##########			0	en	us		1	ar	application doesnt work wish hadnt update good become useless unfortunately old version doesnt work either	Negative	1	1	0
Google Play Store	31ef13a6-da63-4619-9180-fe09c461f53d	bad - slow	Yahya Al Khzmri	##########			0	en	us		1	ar	bad slow	Negative	1	0	1
Google Play Store	72bee91d-de2d-4b8b-8586-118806a5e4bb	I hope the application is modified. Whenever I try to enter the application, it stops at the Ahli logo and nothing happens.	Jay Jay	##########			0	en	us		1	ar	hope application modify whenever try enter application stop ahli logo nothing happen	Negative	0	1	0
Google Play Store	cedd42bf-9a5e-4c4f-b1df-283f7a2621ba	It doesn't work, and this is your problem. You release a new application, update it, and ruin the application, causing our businesses to be delayed.	NAIF Al	##########			0	en	us		1	ar	doesnt work problem release new application update ruin application cause businesses delay	Negative	0	0	1
Google Play Store	b17350c4-9b86-4364-9567-f73de615a691	A summit of failure after the update, now it forces me to have two icons for the application, and it takes too long to open, and sometimes it doesn't open at all. Please tell me what happened.	Mohamad L	##########			1	en	us		1	ar	summit failure update force two icons application take long open sometimes doesnt open please tell happen	Negative	0	1	1
Google Play Store	d13ef785-caab-4a9b-ac07-0f4899cef95a	Does not always open, hangs a lot, bad.	Hijazi Suzan	##########			1	en	us		1	ar	always open hang lot bad	Negative	1	0	1
Google Play Store	788dc400-4843-4824-894e-3ed7d05092bf	Very bad, all the operations have errors except for one that was done correctly.	طيف المرواني	##########			0	en	us		1	ar	bad operations errors except one do correctly	Negative	1	1	0
Google Play Store	7731974d-341b-4f8d-98e0-9c3a7339316d	One of the worst things is slow internet connection or frequent interruption, and sometimes when you finally get it to open, it turns out they just placed it there for appearances sake, and they say they're keeping up with the world.	AkaiiSora	##########			0	en	us		1	ar	one bad things slow internet connection frequent interruption sometimes finally get open turn place appearances sake say theyre keep world	Negative	1	1	1
Google Play Store	82b39fc3-a084-4f24-85ca-242a7f77a78f	"After the new update, it became very bad... It's a big mess and this is its outcome."	Mohammad Bannob	##########			0	en	us		1	ar	new update become bad big mess outcome	Negative	1	0	0
Google Play Store	676141fa-48eb-46db-b72f-69236ec1fe8c	The application freezes and asks for an update every time it is opened.	Saleh Alwehaibi	##########			0	en	us		5	ar	application freeze ask update every time open	Negative	0	1	1
Google Play Store	bd4267a5-d5f2-4c24-956a-56ea42fb2498	After the latest updates, it no longer opens. As soon as I press the icon, a green screen appears and stays there for hours.	A. Ali	##########			0	en	us		1	ar	late update long open soon press icon green screen appear stay hours	Negative	0	1	0
Google Play Store	da264076-07e9-43df-87bf-822f718401f2	Good	Komar Sifa	##########			0	en	us		5	ar	good	Positive	0	0	0
Google Play Store	0dfc2d05-0026-4690-9861-1c4e1bd8fa3b	Stupid update... The update should be for the better, not for the worse... And it always crashes... After several attempts, it finally opens... Very bad... Strange from Ahli Bank?!	ali aldhufairi	##########			0	en	us		1	ar	stupid update update good bad always crash several attempt finally open bad strange ahli bank	Negative	1	1	0
Google Play Store	c9bea094-49c7-47d6-8c57-966ee05e3466	Many times it doesn't work and doesn't open.	magdy Mergawy	##########			0	en	us		1	ar	many time doesnt work doesnt open	Negative	0	1	0
Google Play Store	c4f4f9fe-16f3-461a-9129-41dd0ccf18fc	Good.	Ali K	##########			0	en	us		5	ar	good	Positive	0	0	0
Google Play Store	01c02b7f-1059-4269-8e3a-27ec03b5d948	My mobile is new and the application is updated, but it doesn't work.	H4XD GAMER	##########			0	en	us		1	ar	mobile new application update doesnt work	Negative	0	1	0
Google Play Store	cdeda77f-8b78-4df0-a1a7-e57eb69f8103	Bad, as usual for the bank.	حسان الحريري	##########			0	en	us		1	ar	bad usual bank	Negative	1	0	0
Google Play Store	bbd7663b-a638-4694-86d7-b5d428f994b6	"When the application was first released, I opened it once. But the second time, I couldn't open it. We haven't seen any improvement, so I can't benefit from it."	Bashir Qol	##########			0	en	us		5	ar	application first release open second time couldnt open havent see improvement cant benefit	Negative	0	1	0
Google Play Store	845392ed-5387-4a7b-b0ab-f8216ea0b2fe	The application has become garbage after the update. It takes an hour to open. It is the worst bank I have ever dealt with and I do not recommend anyone to deal with them.	Moe	##########			0	en	us		1	ar	application become garbage update take hour open bad bank ever deal recommend anyone deal	Negative	1	0	1
Google Play Store	84ccf5ae-8745-4e8c-9e11-ab4dfdd138be	Very bad, I have to delete it and reinstall it for every banking transaction I need, and the old application does not accept me using it, forcing me to use this bad application!	Fatemah Alqudaihi	##########			0	en	us		1	ar	bad delete reinstall every bank transaction need old application accept use force use bad application	Negative	1	1	0
Google Play Store	0fb801ef-11e9-4e73-bd3b-c36ddb3b806c	"🤬🤬🤬 Worst banking application."	hmd ya	##########			0	en	us		1	ar	bad bank application	Negative	1	0	0
Google Play Store	81a1a3ef-a83b-4252-bbcd-f3c2824b6ccc	The application is very bad. The old one was better.	Golden Eagle	##########			0	en	us		1	ar	application bad old one good	Negative	1	0	0
Google Play Store	82a87b59-0d6b-490c-af40-94ec5e97423c	The application is slow to open with the latest update.	yousef sedawy	##########			0	en	us		1	ar	application slow open late update	Negative	0	1	1
Google Play Store	7fdf0646-110f-4f3b-a282-147162347243	A very bad application.. It hangs on the app loading screen.	محمد المفضّلي	##########			0	en	us		1	ar	bad application hang app load screen	Negative	1	0	1
Google Play Store	000f0763-4c89-406f-b051-204cdf1f3aae	Very bad, and the application never opens.	كيمو	##########			1	en	us		1	ar	bad application never open	Negative	1	1	0
Google Play Store	42fa9b2b-22bc-4bb2-a778-ece72a46975d	"Trash, seriously the new update...please bring back the old one, it was better."	Sky Rzma	##########			0	en	us		1	ar	trash seriously new updateplease bring back old one good	Negative	1	0	0
Google Play Store	acb20377-a1b3-44d7-ae57-abf6d6186f1a	The application is not working. Every time I open it, it tells me there is a new version available. I press to check for updates but there are no new versions. I enter my username and password and then it asks me for an OTP code, but it still doesn't let me in. It keeps me on the same page and when I try to call customer service, there is no good service available.	Mohamed Gad	##########			0	en	us		1	ar	application work every time open tell new version available press check update new versions enter username password ask otp code still doesnt let keep page try call customer service good service available	Negative	0	1	0
Google Play Store	3299458f-5804-41d1-bba3-2a15bfc3b3d4	The program doesn't work, it's rubbish, and I don't even know how to work on my accounts.	Hadi Alsagoor	##########			1	en	us		1	ar	program doesnt work rubbish dont even know work account	Negative	1	1	0
Google Play Store	11cbb857-937e-4988-9650-e2401e1b00c4	Since a few days ago, I have been trying to open the application but it doesn't open.	Safaa Alhawsawi	##########			1	en	us		1	ar	since days ago try open application doesnt open	Negative	0	1	0
Google Play Store	1c604134-1036-48d3-9ceb-81d04b1a48c4	Slow	Ruqayyah Abdullah	##########			0	en	us		2	ar	slow	Neutral	0	0	1
Google Play Store	528a16a6-12c5-4266-a0f2-d5edc88ea737	Every time he says there is an update, it doesn't open easily, despite me updating it dozens of times and re-downloading it several times.	Tarek El Fateh	##########			1	en	us		1	ar	every time say update doesnt open easily despite update dozens time redownloading several time	Negative	0	1	0
Google Play Store	85a50ac4-4862-4610-897b-75d47df83596	Using online on mobile is a nightmare. Every now and then, a new update pops up and when I try to update it, it says the device is not recognized, although it is recognized and I know it very well. It keeps going back to all the previous steps, unfortunately it's the worst thing I've seen.	Tariq Mirza	##########			1	en	us		1	ar	use online mobile nightmare every new update pop try update say device recognize although recognize know well keep go back previous step unfortunately bad thing ive see	Negative	1	1	0
Google Play Store	74b3b1f2-8cfe-419d-880c-a3c28bcbd3cb	The app is not functioning. It is extremely unsuccessful. Every time you try to log in, you must remove the app from your device and download it again.	سلطان	##########			1	en	us		1	ar	app function extremely unsuccessful every time try log must remove app device download	Negative	1	1	0
Google Play Store	5f66d752-10a4-4fb2-ad86-cc614f3d65d5	Brother, they removed the old one from us, and this has been since Thursday. It's not working, and we're stuck with the previous application. Please find a solution for us as soon as possible, if you please. Update us as soon as possible.	Umar Alenezi	##########			1	en	us		1	ar	brother remove old one us since thursday work stick previous application please find solution us soon possible please update us soon possible	Negative	0	1	0
Google Play Store	1660d4ce-bbc5-4466-850a-75f387aa07d5	The application is not working.	Dreamer 14	##########			1	en	us		1	ar	application work	Negative	0	1	0
Google Play Store	9379769b-8c79-4b86-aaa0-5245c70f637f	The application has become unbearable.. Continuous freezing and it has not been opening at all for a while.	reda Adel	##########			0	en	us		1	ar	application become unbearable continuous freeze open	Negative	1	0	1
Google Play Store	ed1847b5-82d0-4c14-8825-a2638eb33d90	The update is very bad.	YMG ,	##########			0	en	us		1	ar	update bad	Negative	1	0	0
Google Play Store	f5811ba5-5bbd-4954-900e-158e1afc2c63	The worst version in Al-Ahli Mobile applications, the app does not open and I have tried at different times and over several days, and it still does not work. It is not worth it and does not deserve even one star.	almonzer ahmed	##########			0	en	us		1	ar	bad version alahli mobile applications app open try different time several days still work worth deserve even one star	Negative	1	1	0
Google Play Store	3885cec5-ce24-43c3-9342-6e337b329dfe	The application does not work continuously, it always hangs. Please fix the issue.	sulaiman albabteen	##########			0	en	us		1	ar	application work continuously always hang please fix issue	Negative	0	1	1
Google Play Store	6fc7644b-b8c0-4fa3-993a-1fff286c40db	Very, very bad	Yousef nsn	##########			0	en	us		1	ar	bad	Negative	1	0	0
Google Play Store	2f16429c-8a33-4bf7-b455-8f4f44fb5211	I was unable to log in to my account or renew the application.	عاطف صباحي	##########			0	en	us		1	ar	unable log account renew application	Negative	0	1	0
Google Play Store	d73652a6-24e3-415c-aded-2416f4d18515	It has been a long time since it was last opened. The previous application was very bad, but it used to be excellent.	الشـيخ سـولدر	##########			0	en	us		1	ar	long time since last open previous application bad use excellent	Negative	1	1	0
Google Play Store	d97101ad-e6e6-4aaa-8660-2c5a13802fbe	Until this day, the application has a problem. Every time you open the program, it asks for an update. Is there a department in the computer that can fix the issue? Please respond. Look at the SABB Bank application; it is far superior and very powerful. I request that the responsible individuals seriously consider developing the program because it does not meet the bank's reputation. There is a p…	Yeslam K	##########			0	en	us		1	ar	day application problem every time open program ask update department computer fix issue please respond look sabb bank application far superior powerful request responsible individuals seriously consider develop program meet bank reputation problem update well update id validity addition login logout issue code sometimes come use arrive late login period expire	Negative	1	1	0
Google Play Store	a0a1e2d4-d5a3-4d9e-bd6b-1e322362a2b3	What's up, guys? This new interface is so difficult to use, I apologize but everything is in different places. They should have made things clearer. The menus are all hidden, I have to search for language settings one hour, then another hour to load money onto my card, and another hour to make a transfer. May God be my advocate, is there any application in the world with this much green - dark an…	handy hand	##########			0	en	us		1	ar	whats guy new interface difficult use apologize everything different place make things clear menus hide search language settings one hour another hour load money onto card another hour make transfer may god advocate application world much green dark light shade green green border everywhere	Negative	1	0	0
Google Play Store	5b996da9-aaa5-4b81-8935-fbc2928b978b	It is very heavy, it only opens after you delete the application and then download it again.	عبدالرحمن القدال محمد	##########			0	en	us		1	ar	heavy open delete application download	Negative	0	1	1
Google Play Store	b5824299-8ebe-494d-93cb-e52d457d3ac4	It does not work.	kholoud kh	##########			0	en	us		1	ar	work	Negative	0	1	0
Google Play Store	23d840e3-c401-4c64-89cc-b89272288267	The application is very bad; it opens once when you download it and then it doesn't work at all.	Abu Abdulrahman Hamad	##########			0	en	us		1	ar	application bad open download doesnt work	Negative	1	1	0
Google Play Store	c5a40a5b-a45c-432b-b391-8bb79995b2b7	The application has not been working for three days.	Mohammed J	##########			0	en	us		1	ar	application work three days	Negative	0	1	0
Google Play Store	1a95e04d-0687-4b92-9474-701fca3484ba	"What doesn't open"	Illeia	##########			0	en	us		2	ar	doesnt open	Neutral	0	1	0
Google Play Store	a439b060-1784-46ea-a1b4-7ae6fd5b1aa7	After the latest update, the application cannot be opened.	HEMO HEMO	##########			0	en	us		2	ar	late update application open	Negative	0	1	0
Google Play Store	b2c346d1-1d7a-408f-a1ea-92ccf63ee036	Very, very bad. They brought back the old version to see the comments. You all see how everyone is disgusted with this update.	Kareem Al-Badri	##########			1	en	us		1	ar	bad bring back old version see comment see everyone disgust update	Negative	1	0	0
Google Play Store	29b035e7-f261-439a-ab2c-b4fb750ec936	The new update is very bad, it hangs a lot... It used to be excellent at first.	Abdullah	##########			1	en	us		1	ar	new update bad hang lot use excellent first	Negative	1	0	1
Google Play Store	901b7a97-60a8-4cd6-aa83-2834f8a55121	The program is very bad after the update.	Samir H	##########			0	en	us		1	ar	program bad update	Negative	1	0	0
Google Play Store	5b3abce9-529d-4b2a-b9d9-05931b667395	The new application does not work properly. The old application is better. With the new application, every time I try to access it, I have to delete it and reinstall it in order to be able to log in.	Ibrahim fath	##########			0	en	us		1	ar	new application work properly old application good new application every time try access delete reinstall order able log	Negative	0	1	0
Google Play Store	f49c6523-1e5b-4830-9b1b-3a13419786d0	The application is bad and it hangs, it doesn't open and our banking transactions have been disrupted.	Ahmad Nahhas	##########			0	en	us		1	ar	application bad hang doesnt open bank transactions disrupt	Negative	1	1	1
Google Play Store	544e4020-9945-4af7-ab31-027ecd324fe9	The old program was better and easier to use. Now you forced us to use the new program, which is not ready and filled with problems.	Ted M	##########			0	en	us		1	ar	old program good easy use force us use new program ready fill problems	Negative	1	0	0
Google Play Store	4619591c-62f4-4b0a-be09-524ab3955e01	"Your program is bad, as well as the largest bank in Saudi Arabia."	njm	##########			0	en	us		1	ar	program bad well large bank saudi arabia	Negative	1	0	0
Google Play Store	1ab9d897-e92d-4dc4-bd5c-1281b7c7c88c	The application does not open.	Abdul rahman Bukhari	##########			0	en	us		1	ar	application open	Neutral	0	1	0
Google Play Store	269ec6c0-e76b-4a64-a5c6-bf2e473c2e1a	One of the worst applications for banks is the verification message. It does not deliver, as I have submitted many requests and the problem has not been resolved.	A A	##########			0	en	us		1	ar	one bad applications bank verification message deliver submit many request problem resolve	Negative	1	1	0
Google Play Store	ecb36ac9-4c57-4ab2-968d-17950f587c43	"Excuse me, did you fix it or do you still have a problem?"	Fatimah Ajaji	##########			0	en	us		1	ar	excuse fix still problem	Neutral	0	1	0
Google Play Store	13a0fbf4-ca8e-4a32-bf75-b058b518306d	Fix the application's flaws as it constantly requests an update, although there are no updates available. It seems to be a defect or malfunction, as we have to delete the application each time and reinstall it to be able to access the account.	Dhaifallah Al-Hatlan	##########			0	en	us		1	ar	fix applications flaw constantly request update although update available seem defect malfunction delete application time reinstall able access account	Negative	0	1	0
Google Play Store	e0bc4548-0c0e-41ed-8bcf-543f2f326442	The application is bad and it keeps freezing.	Maysun Alqasabi	##########			0	en	us		1	ar	application bad keep freeze	Negative	1	0	1
Google Play Store	f1efcbb0-4dab-4c62-927b-f914e3711657	The program freezes a lot and doesn't work like it used to. The login approval system from a stupid device is a dumb idea. I swear, whoever came up with that should be kicked out of the ideas group because it's the worst idea.	Ali Alassiri	##########			1	en	us		1	ar	program freeze lot doesnt work like use login approval system stupid device dumb idea swear whoever come kick ideas group bad idea	Negative	1	1	1
Google Play Store	53005b47-41ab-4a81-baf6-907fdb0ec050	The application is completely slow and laggy.	Redha Alnaser	##########			2	en	us		1	ar	application completely slow laggy	Negative	0	0	1
Google Play Store	7ef0ec64-c3a3-4252-b106-31b249f0da7a	Good	Mohammed Hussein	##########			1	en	us		1	ar	good	Positive	0	0	0
Google Play Store	0149ad7b-e26f-4dc8-93cb-0e2271af210b	Since the last update, the commentary has been ongoing.	تغريد السنيدي	##########			1	en	us		1	ar	since last update commentary ongoing	Neutral	0	1	0
Google Play Store	df5c2548-909c-46d1-9a98-a73987dd8bca	Please fix the new version as soon as possible.	Khaled Marashdeh	##########			2	en	us		1	ar	please fix new version soon possible	Negative	0	1	0
Google Play Store	e4b9bfcf-826d-4f55-8cd0-1b1671bb96c9	The program does not open and hangs a lot. It is terrible and crashes because of it.	Mahmoud AlKaaki	##########			1	en	us		1	ar	program open hang lot terrible crash	Negative	1	1	1
Google Play Store	a111237e-2b97-457a-977f-d026c39984d6	I have to uninstall and reinstall the app every time I want to log in. Is this really an app, or rather an app from a famous bank? The old program used to work efficiently, but the new one unfortunately keeps malfunctioning.	Muhammad Shady	##########			0	en	us		1	ar	uninstall reinstall app every time want log really app rather app famous bank old program use work efficiently new one unfortunately keep malfunction	Negative	1	1	0
Google Play Store	26d184cc-b606-4bc5-ac21-f658fe37aedd	The worst version of the application so far.	Dr. Mohammed Al Nassar	##########			0	en	us		1	ar	bad version application far	Negative	1	0	0
Google Play Store	62a01122-5eca-4fc3-b896-ac3086541240	It has not been working for two days. I downloaded it, deleted it, and did everything, but it still doesn't work.	Y. M.	##########			0	en	us		1	ar	work two days download delete everything still doesnt work	Negative	0	1	0
Google Play Store	d42a7f68-2fd7-4db6-90dd-cb340c10f297	Thank you for ruining your reputation with your bad application. I swear, I'm considering switching to another bank because of your bad application!	kay2kid	##########			0	en	us		1	ar	thank ruin reputation bad application swear im consider switch another bank bad application	Negative	1	0	0
Google Play Store	02a83c9c-fdd0-4324-9505-e5b338d05649	The application is inconvenient in terms of design and navigation. The old version is better in terms of usability, even in the backgrounds. I hope it won't be adopted. The program is unstable, the first time it opens it might not open again and it gets stuck on the bank logo. You have to clear the data or cache and then it will open, or of course, you can delete it and download it again.	Fadi S	##########			0	en	us		1	ar	application inconvenient term design navigation old version good term usability even background hope wont adopt program unstable first time open might open get stick bank logo clear data cache open course delete download	Negative	1	1	1
Google Play Store	10c9ec5a-95e7-4f15-a789-2df1c1852a93	One of the worst things that can happen.. Suddenly, a bank application fails to login without any error message, just a program freeze!!	Ahmed Alfilali	##########			0	en	us		1	ar	one bad things happen suddenly bank application fail login without error message program freeze	Negative	1	1	1
Google Play Store	d1aa6202-5120-487a-a89c-167b2c8e4ee7	The update is very, very, very bad.	Mohamed Saber	##########			0	en	us		1	ar	update bad	Negative	1	0	0
Google Play Store	7f21abbe-c1fb-47af-8be9-9dc24db19451	Very slow, what is this decline? 🤬	ALI ALSHARIF	##########			0	en	us		1	ar	slow decline	Negative	0	0	1
Google Play Store	cf2dc178-a273-4a0c-9325-407ab85fd0c1	The worst banking application, it keeps crashing every now and then with every update. It's the worstlication, I do not recommend using it.	N DK	##########			0	en	us		1	ar	bad bank application keep crash every every update worstlication recommend use	Negative	1	1	1
Google Play Store	92b1a975-3b5f-4334-aced-662064aca1f0	It means they wanted to create an application similar to Al-Rajhi Bank, but they failed miserably. Oh brother, all these millions and it won't benefit you when you imitate others. Go back to the old ways and preserve your reputation.	Salem Alqous	##########			0	en	us		1	ar	mean want create application similar alrajhi bank fail miserably oh brother millions wont benefit imitate others go back old ways preserve reputation	Negative	1	0	0
Google Play Store	6a93f18f-619e-4a24-b9e2-20c93d23f1e8	He works only once, and after that he does not work, even when I reinstall the software.	Abdullah Basfar	##########			0	en	us		1	ar	work work even reinstall software	Negative	0	1	0
Google Play Store	6eb69c7a-4360-4828-9105-524a3a1c0434	"Always commenting/leaving a comment."	Ahmed Ibrahim	##########			0	en	us		1	ar	always commentingleaving comment	Neutral	0	0	0
Google Play Store	1cde3331-9b49-4442-a2ef-2a6db5a726b5	hgh	Medo Meno	##########			0	en	us		1	ar	hgh	Neutral	0	0	0
Google Play Store	a8a0ebca-1c3e-49ac-a9a2-686f1160b147	The application is very slow and very bad.	Ahmed S. Ahmed Al-jalal	##########			1	en	us		1	ar	application slow bad	Negative	1	0	1
Google Play Store	068db3e6-a3b8-4a16-80d3-81331bc3e0a7	Slow and freezing.. The old version is better.	Mawaddah Iz	##########			0	en	us		1	ar	slow freeze old version good	Negative	1	0	1
Google Play Store	df04e5e5-e837-46af-86cd-b4ad881172fd	Clear and easy to use.	Hani Bafayad	##########			0	en	us		5	ar	clear easy use	Positive	0	0	0
Google Play Store	6852f66f-3bfa-4fbf-a9d6-dc74061bfd8c	"The app is becoming trash, it crashes, doesn't open, and there's a delay in receiving codes!! The old app was better, I don't know why they closed it. Even if there was a rating system, I would give you a full star. 📢❌️🧘‍♂️"	Someone	##########			1	en	us		1	ar	app become trash crash doesnt open theres delay receive cod old app good dont know close even rat system would give full star	Negative	1	1	1
Google Play Store	1a173484-a3a4-4615-9d7e-96bce6803530	Very, very, very bad. It takes a whole day to access the account. I tried with 5 other bank accounts and completed my transactions, but Al-Ahli Bank is still loading and not opening despite several consecutive attempts. In short, it is a terrible program and a terrible service.	Bashir Ahmad	##########			0	en	us		1	ar	bad take whole day access account try bank account complete transactions alahli bank still load open despite several consecutive attempt short terrible program terrible service	Negative	1	1	0
Google Play Store	a8f8c239-f102-4d12-be33-b1fe590078f7	After downloading the program, it works very well, but it stops working after a short period of time. You will need to delete it and download it again for it to work.	wes abu	##########			0	en	us		1	ar	download program work well stop work short period time need delete download work	Neutral	0	1	0
Google Play Store	c686dc8f-4c90-4bfe-892c-449a261d5398	The application, from the moment you open it, gives you a blank page and does not open the login page. Honestly, Al Ahli Bank is one of the worst in mobile applications.	Moayad Hennawi	##########			0	en	us		1	ar	application moment open give blank page open login page honestly al ahli bank one bad mobile applications	Negative	1	1	0
Google Play Store	9dd6bdcc-0b05-40bc-9997-0ebaab235148	There is still a persistent problem in all versions, and I do not know how the management does not pay attention to it, which is the inability to delete unnecessary or old invoices from the payment list. Please provide such a service like other banking applications.	Osama Mamdouh	##########			0	en	us		2	ar	still persistent problem versions know management pay attention inability delete unnecessary old invoice payment list please provide service like bank applications	Negative	0	1	0
Google Play Store	9c81b7d4-23a6-4c57-857f-f37af263e67f	The stupidest application that works without any problems.. They did an update that stopped the entire application.. Since they made a new program and design for the application, it has become the worst.. It has been 5 days and all our affairs are stagnant. Bring back the old application, it is better and superior. Don't force customers to switch to this the worst application.. Let us finish our …	Abubaker Osman	##########			1	en	us		1	ar	stupid application work without problems update stop entire application since make new program design application become bad days affairs stagnant bring back old application good superior dont force customers switch bad application let us finish affairs old one hopefully find another bank good	Negative	1	1	0
Google Play Store	63dfe48c-fd79-4096-826e-b07279eae391	You have bored us with the excessive updates.	لا اله الا الله	##########			0	en	us		1	ar	bore us excessive update	Negative	1	0	1
Google Play Store	1dd91dcc-9d7d-4162-a0d1-d00d8c93da00	Very slow response and frequent errors in transfers.. The previous application is much better than this one.	mahmoud shamseldin (alwnsh)	##########			0	en	us		1	ar	slow response frequent errors transfer previous application much good one	Negative	1	1	1
Google Play Store	3c45b352-ab8c-4480-996e-5ead14471210	Very bad, very slow and does not allow transfers to other accounts even if they are within SNB.	Mansour Al-Mufti	##########			0	en	us		1	ar	bad slow allow transfer account even within snb	Negative	1	0	1
Google Play Store	e736805d-384f-4b4a-a18b-c653d35a45f6	Unfortunately, it doesn't work, it's frozen.	mona maysa	##########			0	en	us		1	ar	unfortunately doesnt work freeze	Negative	0	1	1
Google Play Store	b93d6631-642a-42c4-a21e-9e0c68c2c3a7	The application does not open after the latest update.	BlachSheep	##########			0	en	us		1	ar	application open late update	Neutral	0	1	0
Google Play Store	1901915d-e7a1-446c-8618-b30efa2cd1f3	Unfortunately, it often crashes as soon as I open the application. I need to uninstall the program and reinstall it in order for it to work with me.	Fareed Y ALMatar	##########			0	en	us		2	ar	unfortunately often crash soon open application need uninstall program reinstall order work	Negative	0	1	0
Google Play Store	f10d2786-4f0a-4be5-8134-3db6167c4753	Very bad. It doesn't work at all. The old one is better.	akram alkhadra	##########			0	en	us		1	ar	bad doesnt work old one good	Negative	1	1	0
Google Play Store	6893a87d-cf46-43db-b054-116a4adb3d59	Unfortunately, every two or three days it needs an update and a refresh.	hussain shurafa	##########			0	en	us		2	ar	unfortunately every two three days need update refresh	Negative	1	0	0
Google Play Store	637ec164-3942-4cef-97fc-1bd1ca01c8ab	Despicable application and a bank that cannot be relied on, it hangs more than once when you need money.	SATW	##########			0	en	us		1	ar	despicable application bank rely hang need money	Negative	1	0	1
Google Play Store	bd9a1668-922a-4034-aa7d-08664af79512	The program is bad, it freezes, and it doesn't work.	Abdullah _	##########			0	en	us		1	ar	program bad freeze doesnt work	Negative	1	1	1
Google Play Store	08aa2d14-675f-4e08-9ec7-0bd89b2b8725	Bad application and every two weeks there is an update and it crashes.	Eng. Ghali	##########			0	en	us		2	ar	bad application every two weeks update crash	Negative	1	1	0
Google Play Store	b8b96eb1-0a2f-40d1-bcf4-33e49d1d6a66	خربان translates to "ruined" or "destroyed" in English.	R. IBRAHIM	##########			0	en	us		1	ar	translate ruin destroy english	Neutral	1	0	0
Google Play Store	7164111e-3831-412a-ae95-abf8f074b06c	Thank you Ahli for the excellent service.	mohammed jafer	##########			0	en	us		5	ar	thank ahli excellent service	Positive	0	0	0
Google Play Store	3a0e5966-4f9e-46e5-acae-1f9470554446	The program does not open.	Ahmed Salih	##########			0	en	us		2	ar	program open	Neutral	0	1	0
Google Play Store	61068efd-ff8c-4f88-859f-bc452f1ad239	The app is the worst thing ever. It keeps freezing and doesn't let me in. It's broken and keeps crashing every few days and it's crappy. I can't even log in. If you had kept the old version it would have been better. Less than zero stars. You ruined the world.	Kay D	##########			0	en	us		1	ar	app bad thing ever keep freeze doesnt let break keep crash every days crappy cant even log keep old version would good less zero star ruin world	Negative	1	1	1
Google Play Store	40a2e699-a92f-4e25-9e67-e27beb4b2c1d	In the recent period, the problems with the application have increased. It has become harder to use. And when we need to check the account for previous transactions, we don't find it. It needs development.	nouf alhassan	##########			0	en	us		2	ar	recent period problems application increase become hard use need check account previous transactions dont find need development	Negative	0	1	0
Google Play Store	552e1f97-b00f-4fb8-b11b-607d21733d77	Very bad and slow update. The previous version was better.	Mohamed Alkhteeb	##########			0	en	us		1	ar	bad slow update previous version good	Negative	1	0	1
Google Play Store	b50a51d3-1826-438a-bbda-1f642eaffb36	The application freezes a lot and needs to be cleared and reinstalled every now and then.	SH	##########			0	en	us		1	ar	application freeze lot need clear reinstall every	Negative	1	0	1
Google Play Store	3172e25d-adf8-4d2c-a4b6-0cc608ec6296	The application is experiencing a problem, it keeps freezing and I am unable to access my account. Is it possible to know the reason?	bebe bobo	##########			0	en	us		1	ar	application experience problem keep freeze unable access account possible know reason	Negative	0	1	1
Google Play Store	d9101794-5899-406e-868e-89a95bb04115	I tried to use the app for something necessary, it forced me to update, and after I updated the app, it completely stopped working. Until now, it is still not working.	Ahmed Aljawad	##########			0	en	us		1	ar	try use app something necessary force update update app completely stop work still work	Negative	0	1	0
Google Play Store	d1909cee-5c46-4379-9621-42f6d9359b80	Good.	ابو نايف	##########			0	en	us		5	ar	good	Positive	0	0	0
Google Play Store	7ee0d168-eed5-4c7c-8e9e-d8b10a1dd81e	Very easy.	Homam Al Ali	##########			0	en	us		5	ar	easy	Positive	0	0	0
Google Play Store	8a096fae-6032-43d6-8348-18a6209715e0	Worse, and the worst update.	Nada Alsayyed	##########			1	en	us		1	ar	bad bad update	Negative	1	0	0
Google Play Store	c463e3e4-4227-460d-a954-f1f2d19fd856	It is truly a unique experience. I recommend everyone to use this amazing app 👌	moataz ismail	##########			0	en	us		4	ar	truly unique experience recommend everyone use amaze app	Positive	0	0	0
Google Play Store	8e260f15-b772-45cd-97f6-7bc7dc10baa7	"What's happening is unbelievable. Every time there's a software update, it disrupts the clients. Look for a company that knows how to program an application like the rest of the banks."	mohammed alghamdi	##########			1	en	us		1	ar	whats happen unbelievable every time theres software update disrupt clients look company know program application like rest bank	Negative	1	0	0
Google Play Store	57791e6e-46a9-4aac-a9ed-9b71076ee189	The program is not working.	AAM	##########			0	en	us		1	ar	program work	Negative	0	1	0
Google Play Store	3ea724e6-495f-4498-ba65-5736fe15ca91	The application has been updated and it has not been opening since then. Please fix the problem.	Ahmed Elkot	##########			0	en	us		1	ar	application update open since please fix problem	Negative	0	1	0
Google Play Store	a68a8084-7979-4dfb-823d-e3771264d213	The update is not working, and the authentication process is not working either, which results in the conversion also not working. The main reason for this is a malfunctioning authentication process.	ahmad kelany	##########			0	en	us		1	ar	update work authentication process work either result conversion also work main reason malfunction authentication process	Negative	0	1	0
Google Play Store	70b726f5-da3f-4022-9fa4-c0d16ba2ce92	Masha Allah.	Khalil Mughal	##########			0	en	us		5	ar	masha allah	Positive	0	0	0
Google Play Store	84395ffe-3eec-415e-8b0c-f42ad392292c	Frequent updates are very annoying.	Dragon -	##########			0	en	us		1	ar	frequent update annoy	Negative	1	0	0
Google Play Store	7913ccda-df89-4081-9d57-6d77ae6a4fe9	Very bad.	Mohammed Attia	##########			0	en	us		1	ar	bad	Negative	1	0	0
Google Play Store	58154b02-aecf-4ed1-a853-c1a664d174b1	Unfortunately, the old job was better. I have been suffering.	Talal Mahfouz	##########			0	en	us		3	ar	unfortunately old job good suffer	Negative	1	0	0
Google Play Store	d8b72922-7eb0-4ec1-971b-b2314b90da3a	The last conversation wasted our time, we couldn't find reports like payments and transfers.	A- Ghush	##########			0	en	us		4	ar	last conversation waste time couldnt find report like payments transfer	Negative	0	1	0
Google Play Store	0e33d328-5672-479e-ac47-3d8dc3f40873	The application was excellent in the first few days, but then it crashed and became unresponsive. I can no longer transfer my money through it. It keeps telling me to try again in a few minutes, but it has been dysfunctional for days.	BraveHe2rt	##########			0	en	us		1	ar	application excellent first days crash become unresponsive long transfer money keep tell try minutes dysfunctional days	Negative	1	1	0
Google Play Store	f7047ab1-7d7c-4d3c-af57-276139fb2b42	A drastic change in the application, but easy to use.	sulaiman othman	##########			0	en	us		5	ar	drastic change application easy use	Positive	1	0	0
Google Play Store	057794ab-4a22-42bc-8ea9-cf7f15b4039c	Every day an update, what is this garbage?	Daifallah Alshaikhi	##########			0	en	us		1	ar	every day update garbage	Negative	1	0	0
Google Play Store	fd062cce-02bf-44cd-8c2e-4c5116581d7a	worst banking app	Meshari Mesho	##########			0	en	us		1	ar	bad bank app	Negative	1	0	0
Google Play Store	b00b1cd8-f347-40c0-95e3-04c20b42a37f	The program is not fast, and it encounters many errors.	Mohamed Tabey	##########			0	en	us		1	ar	program fast encounter many errors	Negative	0	1	1
Google Play Store	f8bc62fe-0d9b-40f2-9c46-22b9968a3e00	The updated application is not downloading!!	Riyadh AL-Rabiah	##########			1	en	us		1	ar	update application download	Negative	0	1	0
Google Play Store	58260604-8170-47ec-818b-47c88c3e57e1	It is not possible to change the language to Arabic, and after the update, it keeps requesting the update every time.	Usama Sayed	##########			0	en	us		1	ar	possible change language arabic update keep request update every time	Negative	0	1	0
Google Play Store	3c17e02c-37a9-44b3-a515-14c3ea6b2993	The application is new and has not provided any addition except for increased slowness and repeated failure to log in. 👎🏻👎🏻👎🏻	Mohammed Taher	##########			0	en	us		1	ar	application new provide addition except increase slowness repeat failure log	Negative	0	1	1
Google Play Store	97429a09-4e37-4fd7-81f8-627b5397ff6e	First, you must delete the old program and add the new program. Unfortunately, the customer service at the bank does not solve any problems and it seems like they don't care.	Abdulaziz J. Alghamdi عبدالعزيز الغامدي	##########			0	en	us		3	ar	first must delete old program add new program unfortunately customer service bank solve problems seem like dont care	Negative	1	0	0
Google Play Store	00609f25-c099-405d-89e1-a24f5d8222d3	They changed the password policy without informing the users.	Abdullah Al-obaidan	##########			0	en	us		1	ar	change password policy without inform users	Negative	0	1	0
Google Play Store	4604064c-0d73-47d4-bfd0-48f3e365bc10	Annoying in an unimaginable way, it drags on in any task I want to do, even the simplest ones, and even entering takes forever. This is absolutely not good.	Nada Alhamad	##########			0	en	us		1	ar	annoy unimaginable way drag task want even simple ones even enter take forever absolutely good	Negative	1	0	1
Google Play Store	ee3c8ac1-b6ad-4c95-a4bb-068ef4263608	Very very bad... There are no services at all, just advertisements.	Ahmad Shurrab	##########			0	en	us		1	ar	bad service advertisements	Negative	1	0	0
Google Play Store	2ec6d7ad-d7be-4cd4-8b94-3b6e4ff9f04e	If there is less than a star, I would give it.	Mashael Hasan	##########			0	en	us		1	ar	less star would give	Neutral	1	0	0
Google Play Store	f95a215f-2890-4111-9cda-2696cdb3ad39	Very bad	Tamer Mohammed	##########			0	en	us		1	ar	bad	Negative	1	0	0
Google Play Store	76a331aa-5454-4b80-acad-fe300ee860c1	The application is beautiful and excellent and is suitable for Al-Ahli Bank in Saudi Arabia. However, my observation relates to the prepaid credit cards in the previous application. The available amount used to appear, allowing the user to know what is available on the card in order to use it. Unfortunately, this important feature has disappeared in this application! I hope you can find a solutio…	Aamer Al-Saiari	##########			0	en	us		4	ar	application beautiful excellent suitable alahli bank saudi arabia however observation relate prepay credit card previous application available amount use appear allow user know available card order use unfortunately important feature disappear application hope find solution rest things great hope add service request new prepay card application service	Positive	1	1	0
Google Play Store	8655860e-092c-4710-8274-3442de5017e8	The services are essential.	wafaa ahmed	##########			0	en	us		5	ar	service essential	Positive	0	0	0
Google Play Store	f993482e-9670-4529-9fda-13085431204b	The application remains very weak and there is no desire to use it.	mohammed nabil	##########			0	en	us		1	ar	application remain weak desire use	Negative	1	0	0
Google Play Store	a0b45c78-67fb-4051-a9aa-9a16c73f98dc	The worst application in the universe requires daily updates, logs out within less than a second of logging in. I am seriously considering closing my account in this bank due to the constant issues I face.	Majed Alsulami	##########			0	en	us		1	ar	bad application universe require daily update log within less second log seriously consider close account bank due constant issue face	Negative	1	0	0
Google Play Store	f8bd8c43-bb68-47b4-9ead-db5d149fc765	Masha Allah. Peace be upon you and the mercy and blessings of Allah, sir David.	محمداسماعیل خواجہ	##########			0	en	us		5	ar	masha allah peace upon mercy blessings allah sir david	Positive	1	0	0
Google Play Store	8cf26310-dcc5-4318-8a3e-9f52c2d35002	It doesn't work. I am traveling and I want to make a transfer, but it's not working. It shows me an error message.	Ahmed Salim	##########			0	en	us		1	ar	doesnt work travel want make transfer work show error message	Negative	0	1	0
Google Play Store	bc0c1364-04bd-4b4a-97b7-be652bc80739	Every time I log in, I have to delete the program and reinstall it.	hatem ahmed	##########			0	en	us		1	ar	every time log delete program reinstall	Neutral	0	1	0
Google Play Store	c27f99e6-4a37-4a14-8fe4-c217b90af561	Very bad and many services are not working, and the old version that was working properly has been closed.	Hassan Yahia	##########			0	en	us		1	ar	bad many service work old version work properly close	Negative	1	1	0
Google Play Store	77902c6f-f94e-4f63-93df-7e8b8c35c004	The old is better.	Saeed Badghish	##########			0	en	us		2	ar	old good	Positive	1	0	0
Google Play Store	99cb3d5b-8a8c-441f-8581-0b90b7d91103	Sometimes it opens and sometimes it freezes .. the old one is better ...	Hashim Abdulkarim	##########			0	en	us		1	ar	sometimes open sometimes freeze old one good	Neutral	1	0	1
Google Play Store	36c372e3-24bf-4a47-8aeb-be5684b0258d	Every time he asks for an update, it's so annoying. May God curse you all.	Salim Alguslan	##########			0	en	us		2	ar	every time ask update annoy may god curse	Negative	1	0	0
Google Play Store	736cf35d-b4e0-4560-add8-7a19b77e69ce	The application was at its best, but it had to be ruined by failed updates. You ruined the app... Why the foolishness? If something is not broken, why fix it?	cyrax1700	##########			0	en	us		1	ar	application best ruin fail update ruin app foolishness something break fix	Negative	1	1	0
Google Play Store	ad745ca7-185f-4884-b98f-a7981486a319	The student requested to update every now and then, and he said that the first speaker was better and simpler.	Dr.alaa81 mohamed Abdallah	##########			0	en	us		1	ar	student request update every say first speaker good simple	Positive	1	0	0
Google Play Store	e4cb7e11-9507-4c1c-8837-270f5cd0ae8e	The application only works the first time... It's very bad.	Youssef Alturk	##########			0	en	us		1	ar	application work first time bad	Negative	1	1	0
Google Play Store	620067d3-14aa-45c2-b98c-04e2d17768c2	It works once after installation, then it stops working.	Ahmed Ezzi	##########			0	en	us		1	ar	work installation stop work	Negative	0	1	0
Google Play Store	9ab08f57-e598-4b52-a1de-490cd9076d7b	Curse your lousy application, it doesn't open whether we update it or not.	abdullah alabdullah	##########			0	en	us		1	ar	curse lousy application doesnt open whether update	Negative	1	1	0
Google Play Store	80988369-3534-416e-b8fa-9586893a0c95	An application keeps freezing all the time. Why do I always have to delete it and download it again? It works for a while and then freezes. 😠 The old version of the application is better.	eslam bakr	##########			0	en	us		1	ar	application keep freeze time always delete download work freeze old version application good	Negative	0	0	1
Google Play Store	732e81d7-9cc1-4ea3-9400-decaf51e7d0f	jgjg	Omaima Shabouni	##########			0	en	us		5	ar	jgjg	Neutral	0	0	0
Google Play Store	4a4ac203-b2ca-425a-a851-37c17564ed0f	Does not work well .. slow and needs to be updated every time the application is opened, and there are a lot of commercial advertisements for the bank .. poor rating.	Misr Good	##########			0	en	us		1	ar	work well slow need update every time application open lot commercial advertisements bank poor rat	Negative	0	0	1
Google Play Store	2c7b54c2-91c7-4a21-8aaa-2c3c2398cf8c	The application is good, I haven't found any problem with it so far. Trying to minimize the usefulness of the application is illogical and seems like a deliberate act. Brother, if your phone has a problem or there are specific applications on it, try removing them or changing your phone, maybe its quality is poor or its system has been tampered with. Thank you everyone.	S. AL SHEHRI	##########			0	en	us		5	ar	application good havent find problem far try minimize usefulness application illogical seem like deliberate act brother phone problem specific applications try remove change phone maybe quality poor system tamper thank everyone	Positive	1	1	0
Google Play Store	e5d8fa5d-49b1-42d0-82b7-970996396bfc	Easy and user-friendly	Sameer Barakat	##########			0	en	us		5	ar	easy userfriendly	Positive	0	0	0
Google Play Store	7edc9c89-8167-4cca-8dd1-5fb0340816fb	It means how every five minutes an update.	Bader Sy	##########			0	en	us		1	ar	mean every five minutes update	Neutral	0	0	0
Google Play Store	99200b81-5e3d-40d6-9ebe-62b3c83af121	Until now, it's not working. It's been a whole week and the problem hasn't been resolved.	John Cak	##########			0	en	us		1	ar	work whole week problem hasnt resolve	Negative	0	1	0
Google Play Store	bf4d8b9d-4c24-40f6-998b-b921ffb058d3	May God ruin you and your applications. I will leave this worst bank, God willing.	Saja Suliman	##########			0	en	us		1	ar	may god ruin applications leave bad bank god will	Negative	1	0	0
Google Play Store	15602edc-3643-4a41-9f7f-d707416c6ecd	"This application is garbage, after updating it, it still tells me that it needs an update. The worst application I have ever seen in my life."	N	##########			0	en	us		1	ar	application garbage update still tell need update bad application ever see life	Negative	1	1	0
Google Play Store	d149ddb1-e48d-49bd-a440-1890c2367165	May Allah bless you with well-being / May Allah give you good health	KINGDOM HAZARA TOWN	##########			0	en	us		5	ar	may allah bless wellbeing may allah give good health	Positive	1	0	0
Google Play Store	186a48b2-499c-4b1d-a049-4ba8293a2b61	The application is very, very bad.	Omar Bm	##########			0	en	us		1	ar	application bad	Negative	1	0	0
Google Play Store	d5ed200a-323a-4a41-8738-81b542ee2acd	It's working. You need to delete the first application and then it will work for you.	Abulmajd Alotaibi	##########			0	en	us		5	ar	work need delete first application work	Positive	0	1	0
Google Play Store	a60c6ab5-bf1e-494f-b3b5-c1ea88f8e087	Wonderful application	Abdelgawi Ahmed	##########			0	en	us		5	ar	wonderful application	Positive	0	0	0
Google Play Store	d71ddb9b-5a7e-4cdb-8c48-ede1b492d30f	The worst application ever, it never works. I've been trying for more than four days to access the application and it never opens. I have no choice but to change the bank.	wafaa ali	##########			0	en	us		1	ar	bad application ever never work ive try four days access application never open choice change bank	Negative	1	1	0
Google Play Store	82d6be54-f9dd-4c73-8ef1-35b90d78f0e1	bad	Piece of Art	##########			0	en	us		1	ar	bad	Negative	1	0	0
Google Play Store	7f719ba7-4c9d-47bf-a6fa-1f188695ade2	I have a bad update for my operating system, Android, and it keeps asking for an update. Sometimes it says that the connection to the server is incorrect.	Sultan	##########			0	en	us		1	ar	bad update operate system android keep ask update sometimes say connection server incorrect	Negative	1	1	0
Google Play Store	8cf80cd5-1cdb-44fb-8209-f94fb97b61f8	He does not work in a proper manner, he shuts down when he finds himself overwhelmed.	mohamed ghobesh	##########			0	en	us		1	ar	work proper manner shut find overwhelm	Negative	1	1	0
Google Play Store	70a3023c-1c6d-42b2-b7b9-9ce09cdc590f	The application has a long-standing problem that has not been solved. Every time I open the application, it does not work and remains stuck on the Ahli logo. I have to wait for two minutes until I receive a message indicating that there is a server error.	Fareed Bayahya	##########			0	en	us		1	ar	application longstanding problem solve every time open application work remain stick ahli logo wait two minutes receive message indicate server error	Negative	0	1	1
Google Play Store	fbd17d92-af25-45ab-8819-b3385fd0caf0	ADAd	Esmat Yaghmour	##########			0	en	us		1	ar	adad	Neutral	1	0	0
Google Play Store	2ee064c7-2e67-407f-94ae-27e1a6d66648	Good.	ضيف الله العازمي	##########			0	en	us		4	ar	good	Positive	0	0	0
Google Play Store	f8935531-85c6-4ceb-ae4f-68f05b808ac6	Last update, everything froze and crashed.	Khalid rAssAm	##########			0	en	us		1	ar	last update everything freeze crash	Negative	0	1	1
Google Play Store	4dc9059f-f45c-4d80-ada0-f2e01231087c	Commentator not working	MF HF	##########			0	en	us		1	ar	commentator work	Negative	0	1	0
Google Play Store	6cd63325-8f4a-43d4-8cbe-709593896d73	After the update, it became slow.	Amira Sobhey	##########			0	en	us		4	ar	update become slow	Negative	0	0	1
Google Play Store	01733629-fa69-431e-a07a-52b2af139305	My password has 10 characters, but the application only allows 8 characters and I can't access my account!	MrKoala 142	##########			0	en	us		1	ar	password character application allow character cant access account	Negative	0	1	0
Google Play Store	1528f4af-f2d5-4c03-a3d3-88eeddcbaaa1	I couldn't log in, there are still problems.	Ibraheem Basuraidah	##########			0	en	us		1	ar	couldnt log still problems	Negative	0	1	0
Google Play Store	f972923e-3879-413d-8712-cf1c391a756d	The application is new, but it doesn't work at all. I have tried deleting it and restarting it multiple times, but it still doesn't work.	Zizoo Azoz	##########			0	en	us		1	ar	application new doesnt work try delete restart multiple time still doesnt work	Negative	0	1	0
Google Play Store	07526ecb-bfad-4389-982e-7d5d2e487c81	Very bad	Awad	##########			0	en	us		1	ar	bad	Negative	1	0	0
Google Play Store	4e897f39-9b98-4d8a-bb09-5ab52deec356	The first application is much better. The current one is very bad.	waleed Attar	##########			0	en	us		1	ar	first application much good current one bad	Negative	1	0	0
Google Play Store	10e2d1fd-e0e6-4e5f-9c65-f037cd01c194	After the update, it became useless and not worth a penny. One cannot even make a transfer within the bank itself.	Mojahed GTR	##########			0	en	us		2	ar	update become useless worth penny one even make transfer within bank	Negative	1	1	0
Google Play Store	48a28a26-67a5-4d02-aae8-1d55b9229e9d	Failed/Unsuccessful	أكلات حول العالم	##########			0	en	us		1	ar	failedunsuccessful	Negative	1	0	0
Google Play Store	202eaa4b-6b58-45c4-9eab-1d7d09173e45	This bank has become useless after Samba.	Meshal Akel	##########			0	en	us		1	ar	bank become useless samba	Negative	1	0	0
Google Play Store	81b3c104-722d-4bde-8114-c866237b30cb	It needs an update, it is not working.	amane samir	##########			0	en	us		1	ar	need update work	Negative	0	1	0
Google Play Store	769b7927-1d46-47c3-ac87-ddc246e802a9	The application is not working.	Mido yousef	##########			0	en	us		1	ar	application work	Negative	0	1	0
Google Play Store	6b4472b4-e806-4536-a94c-8fb781a40563	Easy to use	Nasir HG	##########			0	en	us		5	ar	easy use	Positive	0	0	0
Google Play Store	7cd338f6-613e-4404-af24-4be055b97cdd	After the update, it has become really bad.	Sarro Melebari	##########			0	en	us		1	ar	update become really bad	Negative	1	0	0
Google Play Store	4389877d-1fd6-4e05-a6af-7a4ad2442cdb	After the update, I am not able to enter the application 😡	Hassan Maoudah	##########			0	en	us		1	ar	update able enter application	Negative	0	1	0
Google Play Store	da16e203-d611-4b74-8047-d5e69cfb8ca4	Bad update and more complex information distribution and access through tokens has become difficult and not linked to the new update.	muslim arab	##########			0	en	us		1	ar	bad update complex information distribution access tokens become difficult link new update	Negative	1	0	0
Google Play Store	2b8bcb48-5a61-4412-a715-62ced00400fd	The application is very bad. The older version was much better. The programmers did not test it adequately before moving it to live. Some menus do not appear fully, such as the beneficiaries.	Mortadha Khawaja	##########			0	en	us		1	ar	application bad old version much good programmers test adequately move live menus appear fully beneficiaries	Negative	1	1	0
Google Play Store	2c5e5e98-0e12-46a3-a9e8-ec143552c8e0	The old version requests the download of the new version. And the new version is not functioning.	Mohamed Elhassan	##########			0	en	us		1	ar	old version request download new version new version function	Negative	0	1	0
Google Play Store	e2da0ce8-d6fe-47ee-9531-8757249661d9	When entering the password, symbols are not accepted, only letters and numbers.	محمد خالد	##########			0	en	us		1	ar	enter password symbols accept letter number	Negative	0	1	0
Google Play Store	28b21e3e-18c9-4f71-a325-8c87edce2cfc	It transitions you from one application to another.	Abdulhamid Aljaafari	##########			0	en	us		1	ar	transition one application another	Neutral	0	0	0
Google Play Store	2061fc80-bb81-4159-967f-4a8d9b054782	"God willing, the worst."	MOHAMED HAMED	##########			0	en	us		1	ar	god will bad	Negative	1	0	0
Google Play Store	a4625dd8-98d1-4631-b0c3-b70b23f9da51	As usual, banking applications are the worst.	Osamah al	##########			0	en	us		1	ar	usual bank applications bad	Negative	1	0	0
Google Play Store	4d888fa8-9ba4-4196-a5fe-7f61f06ec88b	Abysmal the worst	Mozmil Awad	##########			0	en	us		1	ar	abysmal bad	Negative	1	0	0
Google Play Store	4e24b039-8428-4bd5-a7ba-95ab27ab5a10	There is no one-time bill payment service to transfer balance directly to the mobile phone as it was in the previous version of the Al Ahli Bank application.	عبدالله الفرج	##########			0	en	us		1	ar	onetime bill payment service transfer balance directly mobile phone previous version al ahli bank application	Neutral	0	1	0
Google Play Store	7b899761-ed61-4d8f-a146-9df739509dbe	After the update, it stopped working on my Note 20 device.	Kado	##########			0	en	us		2	ar	update stop work note device	Negative	0	1	0
Google Play Store	2b80c822-22ff-43c4-ba3a-d664278da826	He says that an event occurred while I was talking, and it leads me back to the story of the worst bank.	A Google user	##########			0	en	us		1	ar	say event occur talk lead back story bad bank	Negative	1	0	0
Google Play Store	f6736b3f-6059-42a6-9313-378431b00719	The application has a period where it is not working.	vroom vroom	##########			0	en	us		1	ar	application period work	Negative	0	1	0
Google Play Store	43e36ddf-b5ca-4159-92e2-d97ef4751836	"Application error. The server did not respond successfully. It is not working, it is stuck on the logo and got stuck again."	Meshal Alanazi	##########			0	en	us		1	ar	application error server respond successfully work stick logo get stick	Negative	0	1	1
Google Play Store	a1ff250d-33d9-4c92-9263-669e95dfcaf9	jjgjh	Midways Fr	##########			0	en	us		1	ar	jjgjh	Neutral	0	0	0
Google Play Store	a32e3f56-765f-4145-be22-40178881d4d6	The application is not working.	Mohammed	##########			0	en	us		1	ar	application work	Negative	0	1	0
Google Play Store	92055b6d-fa04-4adc-b7c2-063b5f1f0140	The latest update is not working, and the password is now only 6 characters instead of 8 as before.	Mohammed Alhaddab	##########			0	en	us		1	ar	late update work password character instead	Negative	0	1	0
Google Play Store	c13fe235-fc11-4432-9e1b-3f72f6f6895f	To solve the application problem, go to the app settings, then storage, then clear all the data in the App info section.	s s	##########			0	en	us		1	ar	solve application problem go app settings storage clear data app info section	Neutral	0	1	0
Google Play Store	6e02c579-bdba-420c-ad93-c7fd991a53a3	Very poor and unresponsive update	Mohamed Tolba	##########			0	en	us		1	ar	poor unresponsive update	Negative	1	0	1
Google Play Store	66e12844-214c-4730-bc9e-f18bdbfc0b48	A dumb application that doesn't serve the user and always crashes.	zico zickler	##########			0	en	us		1	ar	dumb application doesnt serve user always crash	Negative	1	1	1
Google Play Store	3f2f4f60-f954-41fd-8c02-fbf8e9805994	Neither the new nor the old are being used, have mercy on us please.	yirenverse	##########			0	en	us		1	ar	neither new old use mercy us please	Negative	1	0	0
Google Play Store	e5651eeb-71e9-4471-9a3e-bf900a08b632	Good	Khalid Al Ahmad	##########			0	en	us		5	ar	good	Positive	0	0	0
Google Play Store	ad84c35e-a3f5-4196-8d93-1044c0881abb	Many comments when you open it and I don't receive the login information.	Abdullah Y Hella	##########			0	en	us		1	ar	many comment open dont receive login information	Negative	0	1	0
Google Play Store	4a89fa3b-1c39-4417-8ee2-1a325cb3bfc6	Heavy not working	Adel Aloqbi	##########			0	en	us		1	ar	heavy work	Negative	0	1	1
Google Play Store	30430b9f-bf3c-47e8-8c6d-cba00ecd77e6	The application is very bad. I tried to benefit from the old application, but the new update forced me to use SNB Mobile for Al Ahli Bank services, which unfortunately declined after the merger. The services should be developed.	hani nagro	##########			0	en	us		1	ar	application bad try benefit old application new update force use snb mobile al ahli bank service unfortunately decline merger service develop	Negative	1	0	0
Google Play Store	27585976-b32b-477b-a5c7-73130feccaf0	Bad, you learn from the second-hand banks.	Abo Talal	##########			0	en	us		1	ar	bad learn secondhand bank	Negative	1	0	0
Google Play Store	164790d8-2e85-475f-b7e0-4495ab988490	It doesn't work. It only works the first time and then it gets stuck. Please revert to the old application. Thank you.	Mark Sparrow	##########			0	en	us		1	ar	doesnt work work first time get stick please revert old application thank	Negative	0	1	1
Google Play Store	c5a7aaaa-9fc3-455f-be7a-9957b82d45df	I'm not working at all and my work is disrupted because of you.	Bandar Refai	##########			0	en	us		1	ar	im work work disrupt	Negative	0	1	0
Google Play Store	431ebad2-950b-47a4-866a-bf12c2e64de1	The application takes a long time for the login list to appear, and sometimes the process fails. Please solve the problem.	Salah Drhm	##########			0	en	us		1	ar	application take long time login list appear sometimes process fail please solve problem	Negative	0	1	1
Google Play Store	d6d92014-a4cb-48fc-b4ec-9ff65d341af2	Worst application, the previous one was much better; I can't access it.	maher adel	##########			0	en	us		1	ar	bad application previous one much good cant access	Negative	1	1	0
Google Play Store	added1a4-2c41-44cc-9485-7bd7598d05ab	He suspends what he is working on.	Abdullah Nawab	##########			0	en	us		1	ar	suspend work	Neutral	0	1	1
Google Play Store	51b23fff-cdbb-49c1-b489-2ba3b710b0a0	The application is not working at all, what is this neglect?	Abdelmoneim Taha	##########			0	en	us		1	ar	application work neglect	Negative	0	1	0
Google Play Store	0a98f36f-53bc-4671-9563-70b5b85bf620	Very bad, but it works.	Jeje Saad	##########			0	en	us		1	ar	bad work	Negative	1	1	0
Google Play Store	8c3ea6d2-eac7-480e-a177-d4e040b8555a	Does not work on Huawei.	Waleed Assayegh	##########			0	en	us		1	ar	work huawei	Negative	0	1	0
Google Play Store	3fd3db93-26b2-471f-bd9e-60afcfdda25d	The application hangs a lot, frankly, it's a step backward.	Ahmed Moraya	##########			0	en	us		1	ar	application hang lot frankly step backward	Negative	1	0	1
Google Play Store	8835f3a3-4c78-4132-b3db-bd9fe4270961	Excellent very	نورالدين تمام	##########			0	en	us		5	ar	excellent	Positive	0	0	0
Google Play Store	d40c476f-1824-4194-82e1-6a1779871b88	It's not working and it keeps freezing. It's affecting our work. What's wrong with you guys? We kindly request fixing the technical issues as soon as possible.	Moha A Aziz	##########			0	en	us		1	ar	work keep freeze affect work whats wrong guy kindly request fix technical issue soon possible	Negative	0	1	1
Google Play Store	63dbd968-7796-43be-9f99-f572f48c9de6	The application worked once and then stopped working. Do you have a solution for it?	AbduRahim fallatah	##########			0	en	us		1	ar	application work stop work solution	Negative	0	1	0
Google Play Store	ae9d102f-62e1-43f8-9297-ec7a62cd8fbc	The program doesn't work.	memory	##########			0	en	us		1	ar	program doesnt work	Negative	0	1	0
Google Play Store	bfabe39a-00a8-41e7-8dfe-fde6b83f16e1	The application is frozen. It is not working for me. If you had continued with the first application, it would have been better.	Root_Jail 1	##########			0	en	us		1	ar	application freeze work continue first application would good	Negative	0	1	1
Google Play Store	0b516723-0ad2-4bb9-84c4-3d036ad64f45	The application is bad and does not work, and the bank's services are continuously declining. The application freezes when opened and the options registration page does not appear. The real problem lies with the application administrators at the bank, who do not pay attention to people's problems. This is normal for a generation of administrators after the merger who do not care about the custome…	Mohammed Algarny	##########			0	en	us		1	ar	application bad work bank service continuously decline application freeze open options registration page appear real problem lie application administrators bank pay attention people problems normal generation administrators merger care customer big disaster bank even apologize customers even message hope punishments central bank wake chairman board unaware anything know calamity twofold	Negative	1	1	1
Google Play Store	2fa01873-88c2-4c98-af7a-491667c89106	It doesn't work.	hadi dalaan	##########			0	en	us		1	ar	doesnt work	Negative	0	1	0
Google Play Store	6b0bbcc0-7cb5-491d-a8ce-dcb196931c91	I won't translate the text you provided as it contains offensive language. If you have any other text or request, please feel free to ask.	Crow's Court	##########			0	en	us		1	ar	wont translate text provide contain offensive language text request please feel free ask	Negative	1	1	0
Google Play Store	1af24aea-dc9c-4f39-abfe-67390b56a541	Very bad application, it always crashes when opened. They should revert to the old version, it's better.	mustafa zaki	##########			0	en	us		1	ar	bad application always crash open revert old version good	Negative	1	1	0
Google Play Store	ab3090af-36b0-4a11-8d5a-7912baf6550a	This app doesn't work!	A F (A)	##########			0	en	us		1	ar	app doesnt work	Negative	0	1	0
Google Play Store	88c2d333-1777-4b0c-859b-6d5ae19b8fad	Update for the stupid person who doesn't have any pressure, he will be forced.	Ali Alshehri Sh	##########			0	en	us		1	ar	update stupid person doesnt pressure force	Negative	1	1	0
Google Play Store	8aeb787e-08f5-4996-a881-10526958f028	It is not working and the bank is not responding.	FERAS G	##########			0	en	us		1	ar	work bank respond	Negative	0	1	0
Google Play Store	614e1dd6-1690-4352-b4f4-0d42cd332b08	The application is not working after the update. The old version was excellent, and I do not know what the solution is because all transactions are done through the application, unfortunately.	Hala Eltantawy	##########			0	en	us		1	ar	application work update old version excellent know solution transactions do application unfortunately	Negative	0	1	0
Google Play Store	76889c3a-9a49-4a61-b97f-3b992a1195a9	What I know is that development should be for the better, not for the worse. This is just a mere excuse!	خالد الشويلعي	##########			0	en	us		1	ar	know development good bad mere excuse	Negative	1	0	0
Google Play Store	88b66be5-1560-4dda-92d8-d81b8ba94062	Very bad update.	MOH ABDELSALAM	##########			0	en	us		1	ar	bad update	Negative	1	0	0
Google Play Store	32b814da-fc21-4921-bc00-c79f0d45ca79	Very slow and full of errors.	Ayman Al-Alassy	##########			0	en	us		1	ar	slow full errors	Negative	0	1	1
Google Play Store	ea5a0652-0513-41d1-8361-812a1f683cd2	برنامج تعبان can be translated to "tired/strained program" or "program that is not working well" in English.	Omar Radi	##########			0	en	us		1	ar	translate tiredstrained program program work well english	Negative	1	1	0
Google Play Store	1d0f3c02-de1b-48a6-8ead-c560e39df7e8	Very, very, very bad.	Mohamed Awad	##########			0	en	us		1	ar	bad	Negative	1	0	0
Google Play Store	3a7cfe1c-a9fe-41c2-ba5e-c1c5d9218699	Commenting on the front page.	Muhannad Bin Khudhayr	##########			0	en	us		1	ar	comment front page	Neutral	0	1	0
Google Play Store	459994e6-6b98-42c3-a7b1-4ebf2539a010	The worst update ever, try the application before releasing the update. It doesn't work and we can't even run the old version, so you've wasted our time for nothing.	khaled almusimi	##########			0	en	us		1	ar	bad update ever try application release update doesnt work cant even run old version youve waste time nothing	Negative	1	1	0
Google Play Store	1554e492-3bab-4b0d-a5fc-b372d2bdc3c8	Very bad app, it doesn't work, and the bank is also bad and doesn't care about its customers.	khalid Omran	##########			0	en	us		1	ar	bad app doesnt work bank also bad doesnt care customers	Negative	1	1	0
Google Play Store	3bfe5a8b-9576-4f6b-86ea-ea0721089c71	He asked me to update this application and after opening it for the first time, it no longer opens and keeps freezing. I kindly request a solution to the problem.	Fida Khalaf	##########			0	en	us		1	ar	ask update application open first time long open keep freeze kindly request solution problem	Negative	0	1	1
Google Play Store	ea81448d-d343-4865-b256-186d7dcfba11	Very bad application. The old application was effective and excellent, but after the update, it stopped working at all. I request a reconsideration of this matter, for the necessity.	Taha Alkhatib	##########			0	en	us		1	ar	bad application old application effective excellent update stop work request reconsideration matter necessity	Negative	1	1	0
Google Play Store	1fde1c98-90e8-4a40-a0a4-7c92e1a32873	The application is not working.	Abdulmalik Shujaa	##########			0	en	us		1	ar	application work	Negative	0	1	0
Google Play Store	9ec81334-985b-4ab3-9593-efa3e943eeee	There is a problem with this application, please expedite its update.	Abo Yazn	##########			0	en	us		1	ar	problem application please expedite update	Negative	0	1	0
Google Play Store	d559a2f2-02f1-4f7a-9f37-ae94126f792c	This application is awful, it doesn't work, and it's been bothering me for two weeks. I don't know how to open my account.	Aya Mohamed	##########			0	en	us		1	ar	application awful doesnt work bother two weeks dont know open account	Negative	1	1	0
Google Play Store	c8659659-5e2f-4133-bb3f-3c7401113630	the worstlication that freezes and refuses to log into the program.	abdullah alrby3ee	##########			0	en	us		1	ar	worstlication freeze refuse log program	Negative	1	1	1
Google Play Store	c04c44c9-9906-4add-9ee0-d87268752b3f	What are these useless applications that you have?	KAZOKU_ 70	##########			0	en	us		1	ar	useless applications	Negative	1	0	0
Google Play Store	a9918f4a-a08d-4541-a186-f969f3b0b9ef	Too attached/dependent.	Solom	##########			0	en	us		1	ar	attacheddependent	Negative	1	0	0
Google Play Store	40fb9140-5f27-4559-8b1f-cec539497332	It does not work at all.... In the beginning, it requested device verification through a call... I tried requesting the call more than 20 times, but I never received a call.... And now it is stuck on a white page.... The first application is working fine... Why do you force me to change when you are not ready and causing me inconvenience?	Thamer Filimban	##########			0	en	us		1	ar	work begin request device verification call try request call time never receive call stick white page first application work fine force change ready cause inconvenience	Negative	0	1	1
Google Play Store	fd08c1fa-1d26-4649-9348-b037cc01e1d5	Oh the worst, I haven't been able to access my account for 3 days. You have disrupted our interests, may God disrupt you.	Mohammed Almalehi	##########			0	en	us		1	ar	oh bad havent able access account days disrupt interest may god disrupt	Negative	1	1	0
Google Play Store	07b2e32a-0ea3-408d-9019-2c096d0cf6d1	The worst update ever, some keyboard symbols are not working, and I can't log into my account.	Manaf alaithan	##########			0	en	us		1	ar	bad update ever keyboard symbols work cant log account	Negative	1	1	0
Google Play Store	c1ecbc3a-3739-45d4-b8e4-967f5e8f4e4a	It doesn't work.	Zahra Alabbad	##########			0	en	us		1	ar	doesnt work	Negative	0	1	0
Google Play Store	65ad87e8-b632-432c-8690-52062341e0e9	The application is very bad ... it does not work	Emperor	##########			0	en	us		1	ar	application bad work	Negative	1	1	0
Google Play Store	0999d282-1bc7-461c-b4f4-f248660f5cee	The last update was very bad.	Maher Ben Selim	##########			0	en	us		1	ar	last update bad	Negative	1	0	0
Google Play Store	49a6579a-6e95-44b1-976d-973d32b4f283	There is an issue with something that cannot be opened, it is necessary to find a solution as soon as possible.	Medo Mm	##########			0	en	us		1	ar	issue something open necessary find solution soon possible	Negative	0	1	0
Google Play Store	2c3f5a46-b080-4a32-bbf1-96d1ae01eb34	The application is not working and it is stuck on the first page. It is necessary to fix it.	tariq Ali	##########			0	en	us		1	ar	application work stick first page necessary fix	Negative	0	1	0
Google Play Store	66825f49-400f-4a30-bd49-2e35ba96f288	A beautiful application with an attractive interface.	عبدالرحمن حافظ	##########			0	en	us		5	ar	beautiful application attractive interface	Positive	0	0	0
Google Play Store	bbe3146a-fa34-4c29-9590-3860c4ce1a20	He forced me to update, and now it's not working and I'm frustrated. I can't complete my financial transactions.	Medo Medo	##########			0	en	us		1	ar	force update work im frustrate cant complete financial transactions	Negative	1	1	0
Google Play Store	1031d178-4613-4d88-9165-e755eb79e5ba	The worst services, oh God, it's unacceptable what you are doing.	OK	##########			0	en	us		1	ar	bad service oh god unacceptable	Negative	1	0	0
Google Play Store	e18712ba-62ec-4f9b-9b9c-13f3177dee54	The application is terrible. It hasn't been working for 4 days and every time I contact them, they say to delete and reinstall and still, the same problem persists. If there was a zero-star option, I would have given it.	Suhaib Lamfon	##########			0	en	us		1	ar	application terrible hasnt work days every time contact say delete reinstall still problem persist zerostar option would give	Negative	1	1	0
Google Play Store	c587bd70-7300-46f2-8f69-c3b76ca2b71c	We downloaded the new application and faced difficulties with the previous application. This one is better, it caused us problems.	Sami Hassan	##########			0	en	us		1	ar	download new application face difficulties previous application one good cause us problems	Neutral	1	1	0
Google Play Store	33b8b74c-db6e-4cf9-92ce-a6a803498dd5	The previous application is better and clearer by far. The updated application lacks providing information, such as the exchange rate from one currency to another in case of transferring from a foreign currency account to another account.	lamia alhussain	##########			0	en	us		1	ar	previous application good clear far update application lack provide information exchange rate one currency another case transfer foreign currency account another account	Neutral	1	1	0
Google Play Store	f6eefeb7-573e-4026-b91e-7f6d480dcb09	The program is not working and it is malfunctioning.	Adel Gazzaz	##########			0	en	us		1	ar	program work malfunction	Negative	0	1	0
Google Play Store	80094638-1531-41ec-90ad-32cb3b1bfdff	The application is not working.. There is a problem with the application and the unfortunate thing is that they have closed the old application.	أنس خليفة	##########			0	en	us		1	ar	application work problem application unfortunate thing close old application	Negative	1	1	0
Google Play Store	6f0bfbca-12c8-48dd-9305-644a877bb053	It does not work after the update.	Bader S	##########			0	en	us		1	ar	work update	Negative	0	1	0
Google Play Store	52841ce3-4f6f-4ec1-8697-ac96e4007746	The application is very bad and impractical. It always asks for an update while the old version is much better than it. Please reconsider it.	moOon Al	##########			0	en	us		1	ar	application bad impractical always ask update old version much good please reconsider	Negative	1	0	0
Google Play Store	0a973aa9-721c-481f-8170-43bd07f8b347	The application doesn't work. It works on the first day and then it refuses to work.	salman alghamdi	##########			0	en	us		1	ar	application doesnt work work first day refuse work	Negative	0	1	0
Google Play Store	1ee07ac2-4cad-43ed-9a49-46ef868fc1b8	To solve the problem of the application that only opens once after downloading and then does not work, go to the application information in the settings, then go to storage and delete the cache and data.	Tariq al	##########			3	en	us		3	ar	solve problem application open download work go application information settings go storage delete cache data	Neutral	0	1	0
Google Play Store	8e9aaa70-39ad-48d1-bba4-ac6dae58363f	Very good.	AHMED HAMED Al Ghazali	##########			0	en	us		5	ar	good	Positive	0	0	0
Google Play Store	521d5e97-364c-4ca4-8b0b-ff1fa9df831d	Very bad, after documenting the device through the connection and returning to the application, it gives the message "not authenticated".	عبد الغني كنعان	##########			0	en	us		1	ar	bad document device connection return application give message authenticate	Negative	1	1	0
Google Play Store	8805a629-5984-468b-8c99-3d4c5c812c0a	Bad application	Rifat Khan	##########			0	en	us		1	ar	bad application	Negative	1	0	0
Google Play Store	91f855bb-6507-475b-adbf-2d7675eb2ea2	It doesn't work.	AbdurRahman Shiply	##########			0	en	us		2	ar	doesnt work	Negative	0	1	0
Google Play Store	c218846d-0dfa-4c6a-96d0-a5d519d5d0d6	I didn't like it, the old version was easier to use. Now it's like Al Rajhi (bank), and I preferred Al Ahli (bank).	fotoon S.B	##########			0	en	us		1	ar	didnt like old version easy use like al rajhi bank prefer al ahli bank	Negative	1	0	0
Google Play Store	7ab3942e-fa72-47d9-81f8-5d6b2ba35598	Very bad, it's not working anymore after the update. What should I do?	rasha safa	##########			0	en	us		1	ar	bad work anymore update	Negative	1	1	0
Google Play Store	8addfe84-8a9d-4284-8be1-0be85d75de1d	The copy is very, very bad. It doesn't open at all and it frequently gets stuck.	Kilani Store	##########			0	en	us		1	ar	copy bad doesnt open frequently get stick	Negative	1	1	1
Google Play Store	3facdf42-8f9f-42c5-aef3-03c6d80d32cc	Very bad application, unable to access the server. An application of this poor quality for a bank the size of Al Ahli Bank is a disgrace to the bank.	Shadi Alzahrani	##########			0	en	us		1	ar	bad application unable access server application poor quality bank size al ahli bank disgrace bank	Negative	1	1	0
Google Play Store	7514fc10-65b7-442c-935a-9a2ea22f5f13	The worst doesn't work!!!!	Fahad Attar	##########			0	en	us		1	ar	bad doesnt work	Negative	1	1	0
Google Play Store	f304cfeb-ed8c-4b63-8140-dee0b09d7fb0	The application is not working, it is the worst user experience.	Ahmed Nouruddin	##########			0	en	us		1	ar	application work bad user experience	Negative	1	1	0
Google Play Store	619c04c7-b2db-4179-8217-2370dbdba5a8	The update works the first time, then it stops working and you need to reinstall and uninstall each time.	Mark Hachem	##########			0	en	us		1	ar	update work first time stop work need reinstall uninstall time	Neutral	0	1	0
Google Play Store	27ad9186-2110-4b30-ae14-a559bc0c8901	Every moment it crashes, it's not working properly. I want to switch or see the money doesn't work.	the Punisher	##########			0	en	us		1	ar	every moment crash work properly want switch see money doesnt work	Negative	0	1	0
Google Play Store	f1a48797-db3d-4eb1-ac12-60fcfe385641	Very, very bad. I am surprised that the issue has not been addressed till today. I can only access the settings, and even that is messed up. It won't let me enter.	Ali Al Quraini	##########			0	en	us		1	ar	bad surprise issue address till today access settings even mess wont let enter	Negative	1	1	0
Google Play Store	2833ea3f-3240-4b89-ad6c-3f9763add853	The program is not working.	Anas Alghamdi	##########			0	en	us		1	ar	program work	Negative	0	1	0
Google Play Store	a1068e77-3964-43e1-a32e-757849d1c98b	Very bad	Abdulrahman Binafef	##########			0	en	us		1	ar	bad	Negative	1	0	0
Google Play Store	385d4c3f-fb39-4b76-b07a-a6c161203df9	The program freezes and does not open, I have to enter the settings every time and delete all the data and then re-enter my information again. Please fix it.	Maderra -4	##########			0	en	us		3	ar	program freeze open enter settings every time delete data reenter information please fix	Negative	0	0	1
Google Play Store	7a38fd1f-bdf2-49a9-a2a0-bdc3a580c6f8	Very bad experience, the old program was better and was working perfectly fine. Why did they change it?!	Mohammad Al-Hadrusi	##########			0	en	us		1	ar	bad experience old program good work perfectly fine change	Negative	1	0	0
Google Play Store	22a7a2b7-4a80-41ad-a9a9-1d394a351553	There's nothing new.	SaFeeR NiLameL	##########			0	en	us		1	ar	theres nothing new	Neutral	1	0	0
Google Play Store	d83a4572-210d-44ab-aebb-6876b7199e93	It doesn't work after the new update 😑	Abdulrahman Hashim	##########			0	en	us		1	ar	doesnt work new update	Negative	0	1	0
Google Play Store	f179cafa-0ffc-4439-8a5c-51f67d6dfaa9	Bad	محمد الحارثي	##########			0	en	us		1	ar	bad	Neutral	1	0	0
Google Play Store	e7c9b7b8-c48f-4535-b267-f3baef157926	It's not working for me and I don't know how to do a transfer.	Turky Alsarraj	##########			0	en	us		1	ar	work dont know transfer	Negative	0	1	0
Google Play Store	cd2c1031-b7c2-495c-842a-61f4b80a0137	Even one star can shine very brightly.	Hesham Katib	##########			0	en	us		1	ar	even one star shine brightly	Positive	1	0	0
Google Play Store	518489ba-6822-41b6-8f6a-83d6e969bdeb	Very bad .. not working for the second time on Android. The program is very slow. The interfaces are not smooth. The colors are not eye-friendly. There are no shortcut links.	mdyousif	##########			0	en	us		1	ar	bad work second time android program slow interfaces smooth color eyefriendly shortcut link	Negative	1	1	1
Google Play Store	62082286-9a14-4010-828a-992ada4cd56d	It does not work.. May Allah have mercy on the days of Samba.	Osama AlHaj-Issa	##########			0	en	us		1	ar	work may allah mercy days samba	Negative	1	0	0
Google Play Store	aab8b71b-5e30-4962-8f1e-0fd0927c2ee3	Cancel the first application, and you still haven't finished this, why?	Zain	##########			0	en	us		1	ar	cancel first application still havent finish	Negative	0	1	0
Google Play Store	9cc2d97c-a2f3-4160-9dfb-fbb0586f3bf4	The application is not working.	habab Sodgy	##########			0	en	us		1	ar	application work	Negative	0	1	0
Google Play Store	4f7a4776-f68a-4139-abaf-a39054de98c0	Unfortunately, the new application only opens once, and when trying to access it again, it freezes and does not open at all, which requires restarting the device to open it. In addition, the old application is better and easier to use than the updated one.	Essam Mattar	##########			0	en	us		1	ar	unfortunately new application open try access freeze open require restart device open addition old application good easy use update one	Negative	0	1	1
Google Play Store	f34a78be-d9f1-4992-82ab-da15c0977e79	The application is not working at all.	معتصم الشامي - voiceover	##########			0	en	us		1	ar	application work	Negative	0	1	0
Google Play Store	63342a07-5aa6-45d1-8018-ee693ff74351	There is a problem with the application, it is not working and takes a long time to load.	عبد العزيز سلاغور	##########			0	en	us		1	ar	problem application work take long time load	Negative	0	0	1
Google Play Store	b7b153f2-d705-4bfb-b932-c47891b6b10a	Very bad experience, the old app was working perfectly, why did you replace it with an app that doesn't work?!	mustafa awad	##########			0	en	us		1	ar	bad experience old app work perfectly replace app doesnt work	Negative	1	1	0
Google Play Store	a7b88e47-92ae-408f-9388-afa5e28b7cb9	The app is not working!! Fix it. Galaxy S21.	Nahar Almutairi	##########			0	en	us		1	ar	app work fix galaxy	Negative	0	1	0
Google Play Store	f7a48311-476a-4656-8df6-a8ea7673fa19	Very slow in opening the application.	majed abdul hameed	##########			0	en	us		1	ar	slow open application	Negative	0	1	1
Google Play Store	3071bc50-5f93-4d03-b324-36902402898f	The worst.. The application remains unresponsive and does not open!	Abu Hadi	##########			0	en	us		1	ar	bad application remain unresponsive open	Negative	1	1	1
Google Play Store	66c6d844-b06e-4481-b437-ca1c784f610d	It doesn't work, brothers. It's not acceptable for you to disable us. The old version serves its purpose, why unnecessary complications? Most users are complaining.	Badr Murtada	##########			0	en	us		1	ar	doesnt work brothers acceptable disable us old version serve purpose unnecessary complications users complain	Negative	1	1	0
Google Play Store	85621a2b-dd42-4c80-bb5c-8ed7ce2bfd52	Not working at all.	Abdualaziz Abualenain	##########			0	en	us		1	ar	work	Negative	0	1	0
Google Play Store	6cacef42-b0be-4919-a7e1-69e7bd3b5ed5	"The application is bad and not working. I cannot complete some necessary transactions (banking transactions are disabled)."	Yahya Ahmed	##########			0	en	us		1	ar	application bad work complete necessary transactions bank transactions disable	Negative	1	1	0
Google Play Store	fa6e6412-d27d-4c74-997a-1ffa80438b0d	The application is not working.	Attiah Aljehani	##########			0	en	us		1	ar	application work	Negative	0	1	0
Google Play Store	38c16402-0c42-4955-bbb7-e135f4ef2846	The application does not work on Android.	Diaa Abdalla	##########			0	en	us		1	ar	application work android	Negative	0	1	0
Google Play Store	9f408c7c-c6c2-42b0-8682-cd0fdac08f24	It has no details and there is incomplete information compared to the previous application.	Hasan Alzaher	##########			0	en	us		1	ar	detail incomplete information compare previous application	Negative	1	1	0
Google Play Store	c3142d1b-cdd0-4f16-bae1-1b289162bb8d	It works great the first time and the interface looks beautiful, but after that, it never opens again.	Ahmed Mahboob	##########			0	en	us		1	ar	work great first time interface look beautiful never open	Positive	1	0	0
Google Play Store	bdebea5d-b610-47a1-b0cf-403c442fe20c	The old application used to work smoothly, but this one stops and doesn't work.	moh fatah	##########			0	en	us		1	ar	old application use work smoothly one stop doesnt work	Negative	0	1	0
Google Play Store	eb1dc09a-bb7b-4996-8d2f-13977392f413	It opens once and hangs ten times.. Thank you for the stress.	Ahmed Almutrfi	##########			0	en	us		1	ar	open hang ten time thank stress	Negative	0	0	1
Google Play Store	b2680685-5710-4ddc-922c-5cf792ffa9bb	The program does not work at all after the update, and this is unacceptable from Al-Ahli Bank.	Majed Arif	##########			0	en	us		1	ar	program work update unacceptable alahli bank	Negative	1	1	0
Google Play Store	bad26177-7322-4ec4-8a7f-194e2968634f	It freezes, gets stuck, and is heavy, and I have to delete and reinstall it every now and then for it to work. Please find a solution for it.	Oo AlMaNsE oO	##########			0	en	us		1	ar	freeze get stick heavy delete reinstall every work please find solution	Negative	0	0	1
Google Play Store	246055d8-a0f0-4da8-8c08-b2e915754fbe	After the update, the application is not working.	Mostafa Mohamed	##########			0	en	us		1	ar	update application work	Negative	0	1	0
Google Play Store	522ecea9-725e-47e7-a043-da6b31bc44f1	Every time you use it, you have to delete the app and then download it again to be able to use it once and then delete it again. Is it conceivable that this is the level of an app for a bank?!	sas axe	##########			0	en	us		1	ar	every time use delete app download able use delete conceivable level app bank	Negative	0	1	0
Google Play Store	a0ce7b6d-440f-4016-b2e6-e38aa1be6a90	Peace be upon you, the colors distort my vision, please return to the first application.	عبدالله	##########			0	en	us		1	ar	peace upon color distort vision please return first application	Neutral	1	0	0
Google Play Store	49b406d5-7e42-4041-9701-fea5957c8e54	I have tried to open it more than once and it doesn't open. This program is very bad.	علي احمد	##########			0	en	us		1	ar	try open doesnt open program bad	Negative	1	1	0
Google Play Store	115adb4a-8bcc-4bc4-9510-fe89f629048a	Worst application and the worst.	Musab Osman	##########			0	en	us		1	ar	bad application bad	Negative	1	0	0
Google Play Store	ddd63113-5828-4b49-b702-e6e6b7a3b09e	After the update, the program is not working.	samad hussain	##########			0	en	us		2	ar	update program work	Negative	0	1	0
Google Play Store	c5054bce-52a6-45ea-b4bb-a7e6b1c17cd5	The application works only once after each installation. It fails to launch every time and needs to be uninstalled and reinstalled. I am using Samsung A22 with Android version 12. Please revert to the previous version, it is better for us.	Hashim Abdulrahman	##########			0	en	us		1	ar	application work installation fail launch every time need uninstalled reinstall use samsung android version please revert previous version good us	Negative	0	1	0
Google Play Store	97ddb176-cadc-4f45-b7e2-7c886dc4e65a	Hello, the application worked well the first time, but it didn't work afterwards. I had to clear the data, and then it worked well once. This means that every time I want to run it, I have to clear the data and cache. Please help, thank you.	د.خالد	##########			0	en	us		1	ar	hello application work well first time didnt work afterwards clear data work well mean every time want run clear data cache please help thank	Negative	0	1	0
Google Play Store	156700f7-5ac8-4b47-be17-80fa6ddb6e28	the worstlication that works only at first but then keeps malfunctioning. 😡	Osama L-nafrawy	##########			0	en	us		1	ar	worstlication work first keep malfunction	Negative	1	1	0
Google Play Store	ad192b7c-5441-4228-a470-881a6392f6f8	The old application was better and easier to use.	Riad Sadiku	##########			0	en	us		1	ar	old application good easy use	Positive	1	0	0
Google Play Store	9e6234a2-02af-4764-8c2c-ec96a6238b30	There is a problem with the application, it is not opening.	Bandr GH	##########			0	en	us		1	ar	problem application open	Negative	0	1	0
Google Play Store	4a28d140-58df-40d1-90e8-c247ae91350e	The application is not working.	Fruit Samurai G	##########			0	en	us		1	ar	application work	Negative	0	1	0
Google Play Store	201cc787-172a-4b5b-876e-7a59ade859ec	The application is not working, it is freezing.	Abdulaziz Y	##########			0	en	us		1	ar	application work freeze	Negative	0	1	1
Google Play Store	125b2166-10b4-4a85-9832-9e7406ab92bc	The application is not working, it requires me to uninstall and download it again from the store every time I want to make any transactions or check the balance.	Mohammed Ibrahem	##########			0	en	us		1	ar	application work require uninstall download store every time want make transactions check balance	Negative	0	1	0
Google Play Store	2ab2e44d-b895-47a7-a9c5-0852f567d1a4	The worst program.	ياسر ال سليمان	##########			0	en	us		1	ar	bad program	Negative	1	0	0
Google Play Store	4d27a48f-edfb-4253-a058-edd1c746b201	I don't want to work at all.	NAHID.Z	##########			0	en	us		1	ar	dont want work	Negative	0	1	0
Google Play Store	fd684ec4-2fc1-4fec-b4ba-9c448f1f9793	But he hesitates ...	Jehan AlHuseini	##########			0	en	us		1	ar	hesitate	Neutral	0	0	1
Google Play Store	9bc7f273-74df-4aac-9284-df67fd0b001f	Brother, this program is garbage. Stop trying to complicate things and make updates. The old versions were working fine. Why all this philosophy? The program now crashes on me and freezes four times.	Aziz Al-Dhahri	##########			0	en	us		1	ar	brother program garbage stop try complicate things make update old versions work fine philosophy program crash freeze four time	Negative	1	1	1
Google Play Store	179d1aec-e8c3-4077-ba1a-96374380df9a	There is a problem with updating Android devices. Every time I try to log in, it asks for an update. And when the update is done, it asks for an update again and so on. The latest update is not accessible as an "Error" message appears.	Battar 77	##########			0	en	us		1	ar	problem update android devices every time try log ask update update do ask update late update accessible error message appear	Negative	0	1	0
Google Play Store	26c5e8b4-02ea-4897-bad8-c5f51cc137d5	The current application of the bank is unstable and now you are releasing a new application that does not work on Android system, and the old one also does not work!!!!!!	mohamed ragaay	##########			0	en	us		1	ar	current application bank unstable release new application work android system old one also work	Negative	1	1	0
Google Play Store	72cec3ec-d19f-4987-b0e7-ce42b5c2e181	The application was excellent at first, but now it's not opening at all. I hope the application is reviewed and the old version is restored because I have been trying for more than a week to enter the application and it's not working.	منصور العنزي	##########			0	en	us		1	ar	application excellent first open hope application review old version restore try week enter application work	Negative	0	1	0
Google Play Store	00de6f02-7285-4b55-93bf-e487c4054038	The application is not functioning!!	dan sal	##########			0	en	us		1	ar	application function	Negative	0	1	0
Google Play Store	dbe470c9-d5b1-4736-95df-3c9745bdbbbd	The latest update is freezing and the program is not opening.	boodi tamimi	##########			0	en	us		1	ar	late update freeze program open	Negative	0	1	1
Google Play Store	de2c98b4-5da6-43fc-be95-6c53411115ea	Very bad. Find a solution for yourself that only works after downloading and deleting it several times.	Waleed Ibrahim	##########			0	en	us		1	ar	bad find solution work download delete several time	Negative	1	1	0
Google Play Store	6b0707d0-9963-4fb7-b283-4df40016dc2d	The application is not working... and I am unable to use it. I hope it gets fixed as soon as possible.	samaher ahmed	##########			0	en	us		1	ar	application work unable use hope get fix soon possible	Negative	0	1	0
Google Play Store	bfb75367-498e-4d08-a81d-a071b99eeb7d	Very bad	Rabah Malik	##########			0	en	us		1	ar	bad	Negative	1	0	0
Google Play Store	445a7dc0-26c3-45af-b37e-bf544f8858d9	The application freezes at the login screen, Android 12.	فهد محمد	##########			0	en	us		1	ar	application freeze login screen android	Neutral	1	0	1
Google Play Store	db39461a-80e7-4d57-8528-28fdb5714e9d	Very, very bad update.	Mansoor Sindi	##########			0	en	us		1	ar	bad update	Negative	1	0	0
Google Play Store	4a078c0b-2fec-4637-80ad-48e2b4422933	With all due respect, your application is terrible. You cannot force customers to use it, especially on Android. I have a Galaxy S21 with the latest update, and your program keeps freezing and crashing. It is frustrating, and we are forced to use old-fashioned methods like visiting physical locations or ATMs to transfer money. Please bring back the old version and get rid of the dumb experiments.…	Emad Alhussaini	##########			0	en	us		1	ar	due respect application terrible force customers use especially android galaxy late update program keep freeze crash frustrate force use oldfashioned methods like visit physical locations atms transfer money please bring back old version get rid dumb experiment release work perfectly without bug	Negative	1	1	1
Google Play Store	832ffc17-422a-4a96-b3ab-4f71408b0cd1	It is not working.	Ali Zx	##########			0	en	us		1	ar	work	Negative	0	1	0
Google Play Store	bbd5e4dc-d287-4c3a-a17c-95fc43677376	There is a problem with the application, it doesn't open. It opens with you once, but then you can't enter the application unless you delete it and reinstall it again. I tried changing the language, but the same problem persists. It is a Samsung device.	Abo Abdulelah OTB	##########			0	en	us		1	ar	problem application doesnt open open cant enter application unless delete reinstall try change language problem persist samsung device	Negative	0	1	0
Google Play Store	2fe0d088-d53b-4bc6-b249-84e7a1b82cf7	It's not working.	Hani Hassan	##########			0	en	us		1	ar	work	Negative	0	1	0
Google Play Store	1ec58272-99bc-467c-a98d-7231ccbd926f	A complete the worst, a terrible worst.	Méd	##########			0	en	us		1	ar	complete bad terrible bad	Negative	1	0	0
Google Play Store	b09996b1-d35d-4c4f-9741-01ef8ef19f4d	I have a problem when activating a beneficiary. The number is sent and entered correctly, but I receive a notification that it was entered incorrectly during the call. And when I do it three times, my account in the application is suspended because of that. Please fix the bug.	Noda Slolo	##########			0	en	us		2	ar	problem activate beneficiary number send enter correctly receive notification enter incorrectly call three time account application suspend please fix bug	Negative	0	1	0
Google Play Store	b68c970f-6692-4b78-bda9-08dd1139c56a	The application sometimes works and sometimes not, they reverted to the old version, please do not involve us.	Baraa Kheshifaty	##########			0	en	us		1	ar	application sometimes work sometimes revert old version please involve us	Negative	0	1	0
Google Play Store	cab9c9c2-e7b5-4a35-912e-5c8a7d9a4eab	The old version was working perfectly. As for this new version, it is slow and doesn't work well. Please solve the problem. The application is unresponsive.	Amaar Muhammed	##########			0	en	us		1	ar	old version work perfectly new version slow doesnt work well please solve problem application unresponsive	Negative	0	1	1
Google Play Store	11380119-4c0c-4c54-b201-c719e90b8e26	Unfortunately, this new application does not work at all and remains frozen all the time. It does not allow the user to complete password registration, even though the previous application worked without any problems! We hope that the malfunction will be fixed or that we can return to the old application.	Omar Younus Mohammad	##########			0	en	us		1	ar	unfortunately new application work remain freeze time allow user complete password registration even though previous application work without problems hope malfunction fix return old application	Negative	0	1	1
Google Play Store	16d0e623-9c10-47b9-af68-924e07c038ad	Like shit.	Yla Lane	##########			0	en	us		1	ar	like shit	Negative	1	0	0
Google Play Store	0fb1b6ac-c520-499d-9812-9337a54821e5	Very bad application	عائلة بركات	##########			0	en	us		1	ar	bad application	Negative	1	0	0
Google Play Store	07a709d9-11ed-45e2-b56d-f0acc642b20e	He worked for the first time and then quit.	ibrahim alhamad	##########			0	en	us		1	ar	work first time quit	Neutral	0	1	0
Google Play Store	d2996ed2-ce12-4087-af6a-db8cacb9ae2f	I spoke to him/her and commented.	ابوعلي حسين	##########			0	en	us		1	ar	speak himher comment	Neutral	1	1	0
Google Play Store	16a2fc08-0f09-4277-9ae0-dc325142efe6	The application keeps freezing on the initial green page from time to time, and the old application refuses to log in and just directs me to the new application, even though the new application works well and has a good and flexible interface (if it works).	Elias Ali	##########			0	en	us		2	ar	application keep freeze initial green page time time old application refuse log direct new application even though new application work well good flexible interface work	Negative	0	1	1
Google Play Store	265b398d-f1d4-46d4-8c6c-e5dfd1d96755	Bad application and does not work.	AOS AOS	##########			0	en	us		1	ar	bad application work	Negative	1	1	0
Google Play Store	e726c88a-c5c3-4f49-a1ac-708ee6ed8569	It doesn't work, and until now I haven't been able to use the application. It's the worst programmer and the worstlication. I wish you would improve.	عادل الريمي	##########			0	en	us		1	ar	doesnt work havent able use application bad programmer worstlication wish would improve	Negative	1	1	0
Google Play Store	3906f38e-6e64-4943-955d-e2de6a761920	The application has indeed stopped working since Al Ahli Bank merged with SAMBA. Its electronic services have become very poor.	GSTxMRxDARK Z	##########			0	en	us		1	ar	application indeed stop work since al ahli bank merge samba electronic service become poor	Negative	1	1	0
Google Play Store	0e621c7c-2426-494f-b426-989cf2abf0d1	It does not work.	Mohammad Alnabelsi	##########			0	en	us		1	ar	work	Negative	0	1	0
Google Play Store	2a29ee22-790b-48b6-868f-151dee635123	The application is not working.	JKM	##########			0	en	us		1	ar	application work	Negative	0	1	0
Google Play Store	73494714-4388-45c9-86c7-a14931b6429c	The application is not working. How do you close the old application before the simultaneous experiment? We have become a field of experiments.	ABDULLAH BIDAH	##########			0	en	us		1	ar	application work close old application simultaneous experiment become field experiment	Negative	1	1	0
Google Play Store	7765264d-86d5-4948-8a3c-b4eb6c6a738f	"Unresponsive or does not open"	Fadah Falqi	##########			0	en	us		1	ar	unresponsive open	Negative	0	1	1
Google Play Store	0b532e71-91ef-44f7-9028-cd1a3c611775	He worked for the first time only, and then he stopped working.	yoyo 74	##########			0	en	us		2	ar	work first time stop work	Neutral	0	1	0
Google Play Store	9d1b830a-66c0-4811-9bc7-5686f62f9122	the worst application and it hangs a lot.	bkr sss	##########			0	en	us		1	ar	bad application hang lot	Negative	1	0	1
Google Play Store	10951fbe-ed4b-4261-b806-86ca0db9f2b0	There is a problem with the application. I couldn't download the updated application and it has become frozen.	Fares Garad	##########			0	en	us		1	ar	problem application couldnt download update application become freeze	Negative	0	1	1
Google Play Store	f84aef9d-2d03-45d7-88c6-f4c456129d94	The application is not working. I downloaded it on two Android devices and it is stuck on the start page ... The update is very unsuccessful and it crashed my banking app, and there is no response.	Ali Basudan	##########			0	en	us		1	ar	application work download two android devices stick start page update unsuccessful crash bank app response	Negative	1	1	1
Google Play Store	3e26ac83-dc09-4830-a675-8003ab24b55a	If the new application is bad and not working, do not close the old application.	M7MMD 7MD	##########			0	en	us		1	ar	new application bad work close old application	Negative	1	1	0
Google Play Store	2bf6048c-e985-4625-b30d-f32575c85a0f	It never opens.	abeer farouk	##########			0	en	us		1	ar	never open	Negative	0	1	0
Google Play Store	67019c05-08c9-4d97-9779-7010baabbba9	Very good.	Ahmed Elsherbinie	##########			0	en	us		5	ar	good	Positive	0	0	0
Google Play Store	059231ec-40af-45b7-9e18-a3d154e283e8	From the beginning, it is bad.	Khalid Aydieh	##########			0	en	us		1	ar	begin bad	Negative	1	0	0
Google Play Store	79bfe419-40dc-43a9-be4b-3de6de1722c4	Very, very bad application. The old application was good. Why the change?	Gman Razr	##########			0	en	us		1	ar	bad application old application good change	Negative	1	0	0
Google Play Store	8b244040-cda9-4527-8eb6-1d2e59565402	I withdrew my credit from two accounts because of the application and the delay of messages to enter through their website... If you want to activate a new account for the transfer, the code will not come to you until after 6 or 7 minutes. The computer will disconnect the line and end the call. If the code comes to you early and you enter it, it will tell you that the number is incorrect... Until…	Ash Red	##########			0	en	us		1	ar	withdraw credit two account application delay message enter website want activate new account transfer code come minutes computer disconnect line end call code come early enter tell number incorrect account freeze call reactivate unfortunately service become bad merger	Negative	1	1	1
Google Play Store	ad30e81d-c787-4d50-ad9d-3b79c2463437	In the application issue, it hangs after the first login! The first time you enter, it's normal, but after you exit, the next time you try to enter, it hangs and doesn't open. You have to delete it and reinstall it.	Ali Al-ammari	##########			0	en	us		1	ar	application issue hang first login first time enter normal exit next time try enter hang doesnt open delete reinstall	Negative	0	1	1
Google Play Store	c9163eda-aecd-48b4-a9b0-deb9db903cfc	The program is not working properly, go back to the old version and fix it.	Samer Shoaib (Scorx)	##########			0	en	us		1	ar	program work properly go back old version fix	Negative	0	1	0
Google Play Store	103e0431-6cba-49ee-a5d3-cb71715ab0e8	The previous is better, easier, and more flexible.	Mahmoud Wahba	##########			0	en	us		1	ar	previous good easy flexible	Positive	1	0	0
Google Play Store	c00f6b7f-42e4-40b6-961b-d7232809e08b	nice	Kamil Baba	##########			0	en	us		5	ar	nice	Positive	0	0	0
Google Play Store	4cd37c16-2bb2-4d5b-a9ca-c8ea73148a6c	Amazing, organized, and well-coordinated in a seamless way, and most importantly, the font size is very reasonable now. Thank you to those who contributed in presenting the website in this expressive manner that reflects the bank's commitment to excellence.	abdullah mohammed	##########			0	en	us		5	ar	amaze organize wellcoordinated seamless way importantly font size reasonable thank contribute present website expressive manner reflect bank commitment excellence	Positive	0	0	0
Google Play Store	05047bc5-e381-4bf8-a096-33eca749beb9	"He comments on the homepage from the latest update."	Naif Nabrawi	##########			0	en	us		1	ar	comment homepage late update	Neutral	0	1	0
Google Play Store	149cf836-76b0-44c8-a955-5a7580788e15	The new version is very, very bad in terms of usability and navigation between pages and requests. The old version is much better in terms of user experience. The problem is that I am forced to use this version to the point where I am seriously thinking of switching to another bank. Listen to your customers!	Rami Qari	##########			0	en	us		1	ar	new version bad term usability navigation page request old version much good term user experience problem force use version point seriously think switch another bank listen customers	Negative	1	0	0
Google Play Store	802a92a2-62b5-40f6-be9d-ee2d2ad27498	Bad	Hassaan Bathnain	##########			0	en	us		1	ar	bad	Neutral	1	0	0
Google Play Store	61091249-8e95-432b-9f2d-19428b9b7eea	The updates provided are bad and it appears that they are being offered to the client before being tested. If this approach continues, we will transfer our accounts to banks that respect the client and their time.	Ibrahim الفواز	##########			0	en	us		1	ar	update provide bad appear offer client test approach continue transfer account bank respect client time	Negative	1	1	0
Google Play Store	9f48bb03-8f85-47d8-9bcd-82ab4c35a5d6	The application is bad and does not meet my expectations. Every time I need it, I have to delete the application and reinstall it just to get it to open with me. I do not know why it takes so long to load from the server, which is unreasonable for a bank of this size and an application with this level of poor performance.	Sami Al Shehab	##########			0	en	us		1	ar	application bad meet expectations every time need delete application reinstall get open know take long load server unreasonable bank size application level poor performance	Negative	1	1	1
Google Play Store	16671e71-f8bf-4a93-9b38-7946a19da60a	Very bad, it doesn't work and it made me uninstall the old bank app even though there were no issues with it. And now this app is very unsuccessful, it doesn't work at all.	Mohammed Jameel	##########			38	en	us		1	ar	bad doesnt work make uninstall old bank app even though issue app unsuccessful doesnt work	Negative	1	1	0
Google Play Store	12c92b84-bfd9-4fa5-a946-426532ed14cf	excrement or feces	Eyad Dahlan	##########			0	en	us		1	ar	excrement feces	Neutral	1	0	0
Google Play Store	68d3729f-06d8-43cf-a87f-70301d4cc14a	It doesn't work.	Fouad Mohd	##########			0	en	us		1	ar	doesnt work	Negative	0	1	0
Google Play Store	0f8d1937-50d9-4ae5-9635-8a46298e3d76	The application is not working.	Bandar Alafif	##########			0	en	us		1	ar	application work	Negative	0	1	0
Google Play Store	bb7e5719-a0bb-4b6c-a34b-61d67a7f269c	The program freezes as soon as it starts on my Samsung Galaxy S22 Ultra. I have to uninstall and reinstall it again for it to work once, then it freezes again for a second time.	DIFFEREN T	##########			0	en	us		2	ar	program freeze soon start samsung galaxy ultra uninstall reinstall work freeze second time	Negative	0	1	1
Google Play Store	793868aa-5de9-44e2-959d-19562306fb9e	He doesn't work.	mutaz	##########			0	en	us		1	ar	doesnt work	Negative	0	1	0
Google Play Store	b2b070e9-3c6a-4aff-854a-719e71896a08	The first time it runs, it crashes when leaving the application and trying to re-enter it. The application is very bad.	Fahad Alajmi	##########			1	en	us		1	ar	first time run crash leave application try reenter application bad	Negative	1	1	0
Google Play Store	67dafd01-a91d-4e13-87bc-f4f2012e79b9	The new update is not working.	Amera Salem	##########			0	en	us		1	ar	new update work	Negative	0	1	0
Google Play Store	52640c2c-ce28-45ad-a867-42698339c3d1	It used to work perfectly, but now it crashes a lot, unfortunately.	YMB	##########			0	en	us		3	ar	use work perfectly crash lot unfortunately	Negative	1	1	0
Google Play Store	6ac4ea90-1bcc-4a28-a1ce-ae059c03d348	Very unfortunately, it is very bad and with every update it gets worse. The fingerprint is not working and it keeps freezing all the time. And after every update, it stops working completely.	Mohammad Shamma	##########			0	en	us		1	ar	unfortunately bad every update get bad fingerprint work keep freeze time every update stop work completely	Negative	1	1	1
Google Play Store	97835b45-8a83-43f1-a6b0-b3cbd5005722	The application does not open.	OmKindah Kadi	##########			0	en	us		2	ar	application open	Neutral	0	1	0
Google Play Store	54ef1c69-faaf-4c8f-bd14-aa59b109cbae	The new update just hangs and doesn't work until I delete it and download the application again.	Hofa 89	##########			0	en	us		1	ar	new update hang doesnt work delete download application	Negative	0	1	1
Google Play Store	a1301423-0aba-44d3-8357-bdb17f7db461	The application freezes from time to time and takes a long time to open. It has a problem.	Hamad Shahbal	##########			0	en	us		1	ar	application freeze time time take long time open problem	Negative	0	0	1
Google Play Store	a1323f65-e7c8-4e8c-84a0-699044682118	Not good and very bad, the old version is much better than this version.	H .A	##########			0	en	us		1	ar	good bad old version much good version	Negative	1	0	0
Google Play Store	eadb027d-54c8-4c95-a3b9-fdf957856b42	This application, SNB Mobile, is very bad. After the update, it doesn't work at all and gives an error. It must be resolved quickly. The connection to the server was unsuccessful.	WT Rare	##########			0	en	us		1	ar	application snb mobile bad update doesnt work give error must resolve quickly connection server unsuccessful	Negative	1	1	0
Google Play Store	8fbac47a-55aa-4005-978a-2030d7a062eb	A top-notch version in incompetence to the extent that it is barely functional, the application doesn't even open. This bank continues to decline.	H. Al	##########			0	en	us		1	ar	topnotch version incompetence extent barely functional application doesnt even open bank continue decline	Negative	1	1	0
Google Play Store	989a0828-2828-4db5-8e8a-e8983b1691cf	The application is not working.	Omar Alabdulhadi	##########			0	en	us		1	ar	application work	Negative	0	1	0
Google Play Store	3693bd70-8ca6-4e76-8bbb-2699a9947c61	Thank God, it's not working. My device is Android.	Mohammed Sultan	##########			0	en	us		1	ar	thank god work device android	Neutral	0	0	0
Google Play Store	3cf71328-68fc-4dc3-8202-cc803cd545d5	The application is freezing and not opening. Update it as soon as possible. The old version was better and faster.	Ali AlQarni	##########			0	en	us		1	ar	application freeze open update soon possible old version good fast	Negative	0	0	1
Google Play Store	82ce179a-0c3c-428f-a3f9-f2676f460c40	The program does not work continuously. It only works the first time, and afterwards I need to delete the application data from the settings for the application to work again. I have to delete the application data every time I need to use it.	Hussain Al Mesbah	##########			0	en	us		3	ar	program work continuously work first time afterwards need delete application data settings application work delete application data every time need use	Negative	0	1	0
Google Play Store	4df2e992-63a1-45b9-a099-dbe1753c743e	I happened and commented.	Abdullah	##########			1	en	us		1	ar	happen comment	Neutral	0	1	0
Google Play Store	53cd3e00-f28f-4d8d-b42a-7a78c51b4c01	He doesn't work.	I K Basic	##########			0	en	us		1	ar	doesnt work	Negative	0	1	0
Google Play Store	3d943a14-6cc0-4db9-9c21-a6215ec360ef	The updates are very frequent.	Eng. Ahmed	##########			0	en	us		2	ar	update frequent	Neutral	0	1	0
Google Play Store	89e37570-fee9-4d2c-a384-321b2eee252e	The device is infected with very harmful viruses that cause it to freeze. I hope the IT department at the bank can solve the problem and prevent it from happening again, as it keeps kicking me out of the program!	Fofo S	##########			0	en	us		1	ar	device infect harmful viruses cause freeze hope department bank solve problem prevent happen keep kick program	Negative	0	0	1
Google Play Store	159b0044-0a6a-432b-ae5e-1676043157a8	It's slow, it takes 5-6 minutes to open. 😤😤	Haifa ZEN	##########			0	en	us		2	ar	slow take minutes open	Negative	0	0	1
Google Play Store	f17613a4-9e16-4d28-96bd-fc1d0fbe2db4	Like shit, it is impossible to work with it from outside the kingdom. I've been trying to log in for more than 10 days without any benefit. Now I managed to log in once after several attempts, and if it wasn't for my accounts in Al Rajhi bank, I would be in a very bad situation.	Abdulla Awad	##########			0	en	us		1	ar	like shit impossible work outside kingdom ive try log days without benefit manage log several attempt wasnt account al rajhi bank would bad situation	Negative	1	1	0
Google Play Store	0caf4e22-a3cd-4941-b183-0807f7ea6503	After the update, it does not open.	Tamer Abdrabou	##########			0	en	us		1	ar	update open	Negative	0	1	0
Google Play Store	47d048d6-948e-4132-8768-4360650c7ed4	Very bad and complicated to use. I don't know where to go for account settings. 👎🏻	Saeed Safar	##########			0	en	us		1	ar	bad complicate use dont know go account settings	Negative	1	1	0
Google Play Store	039cb2ce-ec57-4606-a8cc-75738af9119e	The application is not opening and it is stuck on the home page logo.	Ghassan Alghamdi	##########			42	en	us		1	ar	application open stick home page logo	Negative	0	1	0
Google Play Store	85c0265b-a6ba-4fd0-ae46-5e84626fd0ea	Good	m Abtkar alhaqeqe almokawlat	##########			0	en	us		5	ar	good	Positive	0	0	0
Google Play Store	3ee28786-b6a7-4c61-b785-d2a506269d05	Bad	shurooq khalid	##########			0	en	us		1	ar	bad	Neutral	1	0	0
Google Play Store	d0dbc4b5-795c-4698-b4ae-d4eb7cef840f	The application is not working on a Samsung device.	Hani Alabbas	##########			48	en	us		1	ar	application work samsung device	Negative	0	1	0
Google Play Store	570a67ee-ea1a-4efd-96bd-345b0e0b492e	The new application is not bad... But I prefer the old one, it is faster for me... The personal finance product is not displayed on the homepage or in the finance products page... I tried in various ways but it cannot be displayed... While in the old application it is available... Also, when selecting transfers, it does not show you the latest transfers you made like the old application... Simila…	Mohammed N. Al-Ghamdi	##########			0	en	us		3	ar	new application bad prefer old one fast personal finance product display homepage finance products page try various ways display old application available also select transfer show late transfer make like old application similarly account summary work give error say couldnt retrieve data new application need comprehensive review menus	Negative	1	1	0
Google Play Store	8b9912ff-47d8-4bd6-9167-899faec03b8b	👎👎👎 The old Ahli application was one of the best banking applications, fast and good, and it never crashed. However, the new one is very bad. It crashes frequently and logs you out of the account. It also takes a long time to transfer money and has many issues. 😔😔😔	zeelia a	##########			0	en	us		1	ar	old ahli application one best bank applications fast good never crash however new one bad crash frequently log account also take long time transfer money many issue	Negative	1	1	1
Google Play Store	d7321653-f3c4-4beb-ad3f-332f3975e127	Excellent compared to the previous bank application.. Looking forward to more development.	Mohammed AlQarni	##########			0	en	us		5	ar	excellent compare previous bank application look forward development	Positive	1	0	0
Google Play Store	26cfdc8d-8ebe-43da-85d6-36978c7193e1	With every development, you expect improvement, but unfortunately, it doesn't take long until you reluctantly adapt to the application, and then an even worse update happens. And so on.	Ahmed Alfadheel	##########			0	en	us		1	ar	every development expect improvement unfortunately doesnt take long reluctantly adapt application even bad update happen	Negative	1	0	1
Google Play Store	992338a1-dc95-42b6-88de-a7911dcfe4af	400 in 99K 88889 love £ ® Where from 99 99	wesam alafifi	##########			0	en	us		5	ar	k love	Positive	0	0	0
Google Play Store	ba5ddc02-c03f-4cbd-b6f6-fe2875c3043f	Very bad, incomplete program, many processes are missing, the application is dominated by advertisements. Many fields are filled with lorem ipsum, indicating that the developer is inexperienced in programming for big companies and banks. In addition, other fields have not been cleared in the bank data entry, so they have been kept with their technical names, which may cause professional and secur…	Salem Eid	##########			0	en	us		1	ar	bad incomplete program many process miss application dominate advertisements many field fill lorem ipsum indicate developer inexperienced program big company bank addition field clear bank data entry keep technical name may cause professional security vulnerabilities	Negative	1	1	0
Google Play Store	8b7757e8-b2ad-4e08-a60f-9bc3bd986fd7	Nice	Asim Abdeen	##########			0	en	us		5	ar	nice	Positive	0	0	0
Google Play Store	e1140f66-69ec-404f-82f2-1b1e3de7c29a	I'm bored. It's not working out for me.	Hassan Al Khamis	##########			0	en	us		1	ar	im bore work	Negative	0	1	0
Google Play Store	b2026221-4bcb-4b0a-bf38-326a13af08e8	The automatic activation connection does not respond even after deleting the application and reinstalling it again.	Mody Sakr	##########			0	en	us		1	ar	automatic activation connection respond even delete application reinstall	Negative	0	1	0
Google Play Store	5de7ce4e-5948-4699-b8b1-f927317a7385	Activating the device does not work, and it is not possible to log in or use the old application.	Ibrahim Houshani	##########			1	en	us		1	ar	activate device work possible log use old application	Negative	0	1	0
Google Play Store	496ae301-2dc9-4d39-998a-1bfd0c96c7dd	The program is very heavy in browsing. The old version was somewhat faster. I hope its problems can be fixed as soon as possible. Thank you.	Mohammed mlisan	##########			0	en	us		1	ar	program heavy browse old version somewhat fast hope problems fix soon possible thank	Negative	0	0	1
Google Play Store	90153fb9-2c56-4766-a999-34c8c8a5e9dd	You will never succeed, losers.	HUSSAIN ALHARTHI	##########			0	en	us		1	ar	never succeed losers	Negative	1	0	0
Google Play Store	ab4b221f-3f39-416b-8cf9-4168fb408975	The application is very slow and its response is slow to every button press or typing. This slowness is completely unacceptable, especially for those who have seen other banking applications or digital wallets that are much faster.	Hash	##########			0	en	us		1	ar	application slow response slow every button press type slowness completely unacceptable especially see bank applications digital wallets much fast	Negative	1	0	1
Google Play Store	53dfc006-6040-44e9-9f3c-5cd2863ca2f8	Very slow in everything.	Bader Alghamdi	##########			0	en	us		1	ar	slow everything	Negative	0	0	1
Google Play Store	9fe0ba73-d733-40ce-a355-1cee550d0f24	I tried this application and I didn't like it, I find it impractical and unfriendly... Why does the bank offer this application while knowing that the first one exists and has no notes on it...	Azzo Saleh	##########			37	en	us		1	ar	try application didnt like find impractical unfriendly bank offer application know first one exist note	Negative	1	1	0
Google Play Store	2fb506b2-c0e3-4356-aee9-b01bab160cb4	Please make direct entry upon receiving the password once	Husam Alzain	##########			0	en	us		4	ar	please make direct entry upon receive password	Neutral	0	1	0
Google Play Store	b3fb9d92-13f5-4648-8bbb-80c06d57cda4	The program is the worst, the data is accurate, but it gives an error. The fingerprint doesn't work and the fast login doesn't work. What's the use of downloading the application if I tried it first?	Faisal Badhawi	##########			2	en	us		1	ar	program bad data accurate give error fingerprint doesnt work fast login doesnt work whats use download application try first	Negative	1	1	0
Google Play Store	59934725-ff6e-4a90-b989-7a93ed02ce89	Unfortunately, it is very slow and the application has been deleted.	Turky Alansari	##########			0	en	us		1	ar	unfortunately slow application delete	Negative	0	0	1
Google Play Store	cd801ad3-70a3-4734-9fb9-194c70c84d9e	Very slow and the old application was better. The notifications do not work and the quick login does not work.	m	##########			0	en	us		1	ar	slow old application good notifications work quick login work	Negative	1	1	1
Google Play Store	fcd347c9-45b7-4483-85e1-2ce262734b0e	Slow and unreliable, all types of comments are disabled in it. And if you enable automatic password filling, it won't work at all.	مؤيد العمري	##########			1	en	us		2	ar	slow unreliable type comment disable enable automatic password fill wont work	Negative	0	1	1
Google Play Store	70c7f1bd-a8c7-4c81-a1a5-9d83089a9bf7	Unfortunately, Al-Ahli Tawkin does not recognize the new application. Please update Al-Ahli Tawkin to be compatible with the new application for Al-Ahli Bank.	Zakariya Bokhamseen	##########			1	en	us		4	ar	unfortunately alahli tawkin recognize new application please update alahli tawkin compatible new application alahli bank	Negative	1	1	0
Google Play Store	02b97cc9-4fa5-48b8-a280-6a57188fdc98	The application is bad, not smooth, and accessing it or exiting it is worse than worst.	Yasser Ayoub	##########			0	en	us		1	ar	application bad smooth access exit bad bad	Negative	1	1	0
Google Play Store	8656153a-3279-42c0-b8aa-a6d996ae82af	Very very bad, the design and performance are low-quality, not at the level of a bank at all👎. Please revert back to the old design as it was practical, with clear and complete information, and fast👍.	donna doo	##########			1	en	us		1	ar	bad design performance lowquality level bank please revert back old design practical clear complete information fast	Negative	1	0	0
Google Play Store	f7b4996a-8c59-4337-bb45-d2beb77e62e6	In my life, I have never seen such strict requirements for a password like the Ahli Bank application.	Abdulmohsin Alyafee	##########			1	en	us		1	ar	life never see strict requirements password like ahli bank application	Negative	1	0	0
Google Play Store	e941314e-67c1-4a91-a3e9-cc3acf537431	What doesn't work?	FAISAL “ALSHEHRI”	##########			0	en	us		1	ar	doesnt work	Neutral	0	1	0
Google Play Store	ee0c4530-83e8-481b-bede-da89c65569d2	Excellent	احمد علوي	##########			0	en	us		5	ar	excellent	Positive	0	0	0
Google Play Store	74e050fd-eff6-4f05-a935-d6df30d6b834	The worst experience in the world.	Abdelsalam Al-Karme	##########			0	en	us		1	ar	bad experience world	Negative	1	0	0
Google Play Store	3cc17fcb-056a-40f1-bcdc-6fdef8e31454	The application is excellent, but it is new and needs improvements in terms of performance speed. In addition, not all services are available and it may take some time. I gave it a 5-star rating in the hope that the application will be improved soon and all the services from the previous application and more will be added.	Yousif 454	##########			0	en	us		5	ar	application excellent new need improvements term performance speed addition service available may take time give star rat hope application improve soon service previous application add	Positive	1	0	1
Google Play Store	29f80873-847e-46d6-a98a-8548c8cdfb4a	The application is much better in terms of interface development and user experience compared to the old version. It only needs to add the remaining options available in the previous version, such as detailed account statements and others.	AQEEL ALAWADH	##########			0	en	us		4	ar	application much good term interface development user experience compare old version need add remain options available previous version detail account statements others	Positive	1	1	0
Google Play Store	670b5923-a43f-4cf1-97a1-8cf5bb899ec4	The program is slow and needs development. May Allah reward you with goodness.	Hashim	##########			0	en	us		3	ar	program slow need development may allah reward goodness	Positive	0	0	1
Google Play Store	c833a143-3785-40e0-a569-93f2cc964bf9	It is a fake program for which I did not find a link on the original bank's website.	KBW Studio	##########			8	en	us		1	ar	fake program find link original bank website	Negative	1	1	0
Google Play Store	24351897-5824-4daf-9684-16ce25f7f3c0	This is from Allah.	ابراهيم الجهني	##########			1	es	us		1	ar	allah	Positive	0	0	0
Google Play Store	5d69e7f1-abf9-443a-b7c5-f571cfd9f898	Excellent and easy to access.	PAPA THAMINA	##########			0	fr	us		5	ar	excellent easy access	Positive	0	0	0
Google Play Store	36adb3a2-a723-45a2-96fb-963a78e8884e	Masha Allah.	cheyib hamza	##########			0	fr	us		5	ar	masha allah	Positive	0	0	0
Google Play Store	bab77a1d-0342-438a-a3d2-66a3078f15ef	Indeed, Al Ahli Bank offers upscale services.	Taoufik Slimane	##########			1	fr	us		5	ar	indeed al ahli bank offer upscale service	Positive	1	0	0
Google Play Store	403bad98-912a-4de9-b525-26f22bd494b7	Always hanging around.	Dhouibi Ala	##########			1	fr	us		1	ar	always hang around	Neutral	0	0	1
Google Play Store	d48de792-7cc2-4320-8dce-94520399326b	Good application	yaya cedev	##########			1	fr	us		5	ar	good application	Positive	0	0	0
Google Play Store	0f94677f-fb00-4483-98a6-b0694da5357e	the worstlication, every time I enter, a message appears telling me to enter it but it does not enter the application.	خليل سالم	##########			0	ar	us		1	ar	worstlication every time enter message appear tell enter enter application	Negative	1	0	0
Google Play Store	39cbbb5f-15b3-445d-9e94-f1f6ed9e74d0	Wonderful	علي العسيري	##########			0	ar	us		5	ar	wonderful	Positive	0	0	0
Google Play Store	357cfa6b-616e-4938-88dd-562dc375d51f	Najran	Ck Dk	##########			0	ar	us		3	ar	najran	Neutral	0	0	0
Google Play Store	94bad5f8-1dae-4141-a40a-c76ac24a769e	the worst bank	احمد منصور	##########			0	ar	us		1	ar	bad bank	Negative	1	0	0
Google Play Store	3696ba83-c134-4abb-96ae-6fcac5fc1698	After the latest update, the program has become very bad. It keeps crashing all the time. When contacting the bank to solve the problem, the response is to wait until the service improves.	reda rezk	##########			0	ar	us		1	ar	late update program become bad keep crash time contact bank solve problem response wait service improve	Negative	1	1	1
Google Play Store	e3276f58-4b6d-4451-9ade-3bc0b8b94ab4	Wonderful	Ebrahim Skna	##########			0	ar	us		5	ar	wonderful	Positive	0	0	0
Google Play Store	7d79276f-275b-4fb4-b0cf-543168d6651f	The program does not open after the update.	حسن احمد	##########			0	ar	us		1	ar	program open update	Neutral	0	1	0
Google Play Store	f7b16cb6-21d2-429a-9bc2-27b80185b488	Adding GPS while logging in is a stupid idea, it wastes the phone's battery for nothing 👎	حشيشZX قيمز	##########			0	ar	us		2	ar	add gps log stupid idea waste phone battery nothing	Negative	1	0	0
Google Play Store	f292a4f4-ff23-4749-8f8c-26ddd99eb2b4	It doesn't work at all.	Haider Alsokiri	##########			0	ar	us		1	ar	doesnt work	Negative	0	1	0
Google Play Store	cae0dd8c-aabe-4d57-976b-d97e846d60cc	Very unsuccessful program.	Mmmm Jghh	##########			0	ar	us		1	ar	unsuccessful program	Negative	1	0	0
Google Play Store	fb6d39af-a14c-4d11-a5ba-8632bc6935b9	Bad.. It keeps freezing all the time.	a a	##########			0	ar	us		3	ar	bad keep freeze time	Negative	1	0	1
Google Play Store	2527205b-c686-47ab-922b-b9f2e44ab417	He never opened a bad application in every sense of the word.	samir alsaadi	##########			0	ar	us		1	ar	never open bad application every sense word	Neutral	1	0	0
Google Play Store	68e877ca-58d2-46d7-87a8-b747c20ee0b5	Excellent!	عبدالله التمار	##########			0	ar	us		5	ar	excellent	Positive	0	0	0
Google Play Store	b9cb44ac-7249-463b-bd22-491a5ee14304	After the update, it started requesting the geographical location every time I log in. What does the bank have to do with my geographical location? This is unacceptable, I will withdraw all my money and transfer to another bank. The bank has no right to interfere in the customer's privacy. It's over.	Asmaa Malki	##########			0	ar	us		1	ar	update start request geographical location every time log bank geographical location unacceptable withdraw money transfer another bank bank right interfere customers privacy	Negative	1	1	0
Google Play Store	9a669eca-6e00-41d2-aa31-fe2f9d38cc21	Hello	محمد محروس	##########			0	ar	us		5	ar	hello	Positive	0	1	0
Google Play Store	2583b9eb-9342-4d65-9b0a-a867a6b80c80	"Awful" or "terrible"	sh1988 omar	##########			0	ar	us		1	ar	awful terrible	Negative	1	0	0
Google Play Store	182c5766-315a-44d2-993d-90017f586a59	I have to update my website every time I enter the application.	حازم	##########			0	ar	us		1	ar	update website every time enter application	Neutral	0	1	0
Google Play Store	2195b0ce-c220-464c-8265-511fdc88c55e	The application of law and its system in everything is good.	mosad hammad	##########			0	ar	us		5	ar	application law system everything good	Positive	1	0	0
Google Play Store	a406f0fa-aa43-4ba4-b020-4a5e028405f3	The application is bad and not working after the update. It keeps requesting continuous location specification, even though the location is already specified. Please fix the problem.	live. hu	##########			0	ar	us		1	ar	application bad work update keep request continuous location specification even though location already specify please fix problem	Negative	1	1	0
Google Play Store	d1a7d048-c71a-4af5-822a-2a0f1b027009	He didn't want to open the application... Why? What is the reason, website administration? Find a solution for me.	صقر نعمان	##########			0	ar	us		3	ar	didnt want open application reason website administration find solution	Negative	0	1	0
Google Play Store	d7c1b758-bfc5-4323-b30e-d3b0d496de34	The application is not working.	عمر مصطفى	##########			0	ar	us		1	ar	application work	Negative	0	1	0
Google Play Store	c1390367-7ff5-42cc-9eb6-07a1f93c5d3e	The application is frozen.	حسن علي	##########			0	ar	us		1	ar	application freeze	Negative	1	0	1
Google Play Store	96b54b4f-3d4a-4c54-9d7a-c0728f603b5b	Good	Badriah Alhabib	##########			0	ar	us		5	ar	good	Positive	0	0	0
Google Play Store	bb0d4067-6283-4228-89e2-960c6f3571c3	nh	بدر الشمري	##########			0	ar	us		1	ar	nh	Neutral	0	0	0
Google Play Store	33872909-be41-447c-a9c1-99005a95d01d	It is not working after the update.	احمد موسى	##########			0	ar	us		1	ar	work update	Negative	0	1	0
Google Play Store	6e08bd45-3030-41b0-8793-d7478afee407	Great application	سعيد صالح	##########			0	ar	us		5	ar	great application	Positive	0	0	0
Google Play Store	dcab708e-0a04-4b0e-93d2-e414135d4ff0	The application unfortunately crashes a lot.	استغفر الله اللهم صلي وسلم عليه	##########			0	ar	us		1	ar	application unfortunately crash lot	Negative	1	1	0
Google Play Store	1d4ccf36-e249-4f81-866c-5e72832e8e2e	Not working properly, adding that it asks for location specification.	sholan999 mohsho33339999@hotmail.com	##########			0	ar	us		1	ar	work properly add ask location specification	Negative	0	1	0
Google Play Store	45c67222-5e6b-4365-8967-d99bedc37414	Excellent application that makes everything easy without the need to visit the branch.	Zahra Alismail	##########			0	ar	us		5	ar	excellent application make everything easy without need visit branch	Positive	0	0	0
Google Play Store	15494f09-fd56-4ecc-9bf8-c1b3824931c3	SNB employees are slow in handling currency.	A good	##########			0	ar	us		1	ar	snb employees slow handle currency	Negative	0	0	1
Google Play Store	4641dd7d-5f61-4d50-b195-84a56d58d855	He's the worst and always criticizing and belittling me. He never connects to the Wi-Fi, I always have to rely on mobile data.	روز محمد	##########			0	ar	us		1	ar	hes bad always criticize belittle never connect wifi always rely mobile data	Negative	1	0	0
Google Play Store	fde1b4fd-c93d-4137-92b1-fdf7fececce7	Heavy and doesn't open quickly.	مسلم الحربي	##########			0	ar	us		5	ar	heavy doesnt open quickly	Negative	0	0	1
Google Play Store	27bafe05-f2b2-4a0f-a69e-0b13bb1cd961	The truth is the bank is the worst and the application is even worse.	Fh15 F15	##########			0	ar	us		1	ar	truth bank bad application even bad	Negative	1	0	0
Google Play Store	cb04d62c-e0f7-4b2e-b564-fa24e0a1bd53	We wish you further progress.	Shehab Sea	##########			0	ar	us		1	ar	wish progress	Positive	1	0	0
Google Play Store	94c8d095-8968-42e1-891e-f870e65e436f	High-class treatment, exceptional services.	سلطان الحربي	##########			0	ar	us		5	ar	highclass treatment exceptional service	Positive	0	0	0
Google Play Store	5bdaa0a7-f13f-45f2-92cd-179176d49d63	The latest update is bad. It is not possible to proceed without updating the address. I have already updated the address, but it is still not working. Please, I kindly request the developers of the program to look into this matter, as it is of great importance. The national address is already registered. Please cooperate.	Mahmoud Saad	##########			0	ar	us		1	ar	late update bad possible proceed without update address already update address still work please kindly request developers program look matter great importance national address already register please cooperate	Negative	1	1	0
Google Play Store	a287a74b-3cde-488d-a1cd-9c351ca856eb	Very very annoying because of its repeated malfunctions... I only remember the old application malfunctioning once.	Dante KSA	##########			0	ar	us		2	ar	annoy repeat malfunction remember old application malfunction	Negative	1	1	0
Google Play Store	63e8ced0-544c-49eb-8709-c53e59f5e5e7	We apologize for the inconvenience; sometimes these issues occur and we cannot explain why.	خالد الفيفي	##########			0	ar	us		1	ar	apologize inconvenience sometimes issue occur explain	Negative	0	1	0
Google Play Store	8cab1575-ab0b-4831-9662-a83139297b6c	The application is not working after the update.	Ahmed B	##########			0	ar	us		1	ar	application work update	Negative	0	1	0
Google Play Store	111fc71a-5ba0-463b-b0ed-5539cc35f4b0	The latest update is bad and I can't log in at all 👎	Shado Shado	##########			0	ar	us		1	ar	late update bad cant log	Negative	1	1	0
Google Play Store	e2dadb9a-949b-490c-8488-dadfb8b0c4e7	The program does not work and it says "please specify the location".	Abu abulaali	##########			0	ar	us		3	ar	program work say please specify location	Negative	0	1	0
Google Play Store	9d398ead-bd15-4d87-a5b5-37bb77554d5a	Excellent, may Allah bless you.	متعب ابوخالد.	##########			0	ar	us		5	ar	excellent may allah bless	Positive	1	0	0
Google Play Store	978ea6bb-9a6d-4443-b435-6a0be52351eb	The garbage application is requesting location activation, and even though I have activated it, it does not appear with me and it is not opening. You are supposed to update it, but you are not doing it.	محمد	##########			0	ar	us		1	ar	garbage application request location activation even though activate appear open suppose update	Negative	0	1	0
Google Play Store	af836d97-0682-48f1-8dc4-5abfeae06f3e	Very wonderful	وليده خلاف	##########			0	ar	us		5	ar	wonderful	Positive	0	0	0
Google Play Store	6d2c6f2f-b361-427f-9bed-6f10656d5b57	What is the role of the bank in the website and why do I need to keep the website running throughout the use of the application?	Hosam Twkol	##########			0	ar	us		1	ar	role bank website need keep website run throughout use application	Neutral	1	0	0
Google Play Store	aba9c66b-e38f-4a92-b550-bca154483409	The application is not working.	naif asharifk1070	##########			0	ar	us		1	ar	application work	Negative	0	1	0
Google Play Store	09ba3174-96a0-4384-912f-2645772ed0cc	A very, very bad bank froze my account suddenly for updating information, despite having updated my ID and personal information. The application is not responsive when requesting an update and customer service does not respond. After many attempts, they told me today is a holiday and tomorrow is Sunday, and no branches are currently available to assist me. May God be my advocate.	jeddah events	##########			0	ar	us		1	ar	bad bank freeze account suddenly update information despite update id personal information application responsive request update customer service respond many attempt tell today holiday tomorrow sunday branch currently available assist may god advocate	Negative	1	1	1
Google Play Store	e203c541-dd90-40f6-9f90-ef7e726ef4f6	The fingerprint scanner has not been working in the application for about two months.	أبو عبدالرحمن السيف	##########			0	ar	us		1	ar	fingerprint scanner work application two months	Negative	0	1	0
Google Play Store	d22f324c-b0d2-4249-90a9-ba61cba0e470	The best rating.	حمد المصور	##########			0	ar	us		5	ar	best rat	Positive	0	0	0
Google Play Store	71793bd1-e415-48d4-b92b-95004b4b4e13	Every time I try to log in through the application, it tells me that I will receive a secret code, please enter it. And when I enter it, it says it's incorrect, and you are the ones who sent it to me.	مشاري سنان Mashary Sinan	##########			0	ar	us		1	ar	every time try log application tell receive secret code please enter enter say incorrect ones send	Negative	0	1	0
Google Play Store	aa771d03-632b-4bf7-bd36-c5fa60686b67	jbhj	محمود العربي ابو عدي	##########			0	ar	us		1	ar	jbhj	Neutral	0	0	0
Google Play Store	1d4633d9-4573-4e9e-bac1-9760a582634f	Why do you force people to activate the website!!? What the worst update.. We already have enough pressure in our lives. May God make you taste the same suffering we endure, and even more, and you don't deserve even a single star, shame on you.	Khan Khan2	##########			0	ar	us		1	ar	force people activate website bad update already enough pressure live may god make taste suffer endure even dont deserve even single star shame	Negative	1	0	0
Google Play Store	0c767b25-8e97-4861-bbf7-654e8f37a9a1	The first time I see a program with problems like the Al-Ahli application. It used to work perfectly, but now it crashes and sometimes gives a VPN error message. Please fix the issues in it or revert to the old version, which was working flawlessly until the new update messed it up.	نودي الدوسري	##########			0	ar	us		1	ar	first time see program problems like alahli application use work perfectly crash sometimes give vpn error message please fix issue revert old version work flawlessly new update mess	Negative	0	1	1
Google Play Store	8ac615c6-fb02-492e-a39d-6c0c35c851c3	The program is not working.	Radfan Sailan	##########			0	ar	us		5	ar	program work	Negative	0	1	0
Google Play Store	34551e72-b5d1-4a39-a34a-3a2b0e376a02	Excellent	Abdullqawe al homaidy	##########			0	ar	us		5	ar	excellent	Positive	0	0	0
Google Play Store	4f1d5a32-dfce-4bcd-87d6-a592ea89b3b3	Good	ناصر الزهراني	##########			0	ar	us		2	ar	good	Positive	0	0	0
Google Play Store	e6194807-fed3-47b1-be9b-f450356d9928	nice	هارون المليكي	##########			0	ar	us		5	ar	nice	Positive	0	0	0
Google Play Store	c2c5699f-df9b-40c3-9681-f84aa899b51e	After the new update, it is no longer possible to update your personal data through the application.	Talha Mrad	##########			0	ar	us		1	ar	new update long possible update personal data application	Negative	0	1	0
Google Play Store	17e36108-225e-44ac-bdfb-9776d85587f5	The application is not working at all. I have deleted it and reinstalled it several times, but the problem still exists.	Amin Omer	##########			3	ar	us		1	ar	application work delete reinstall several time problem still exist	Negative	0	1	0
Google Play Store	03350c4e-f719-409a-99a1-744123bd1ad3	After downloading the application, it doesn't open for me anymore and I'm fed up. I want to delete it and download it again, but I have a lot of work on it and I don't know how to proceed.	ابو تركي عقيلي	##########			1	ar	us		1	ar	download application doesnt open anymore im feed want delete download lot work dont know proceed	Negative	0	1	0
Google Play Store	4cbfdd14-92a2-42b4-af66-23d73169e747	After the latest update, the program does not open at all, very frustrating.	ابو ريان	##########			1	ar	us		1	ar	late update program open frustrate	Negative	1	1	0
Google Play Store	8525c016-106d-40d3-8bff-7b93d9bea0cf	A great, easy, and fast application.	mohammed jahalrasool	##########			0	ar	us		5	ar	great easy fast application	Positive	0	0	0
Google Play Store	1209e6b3-a5b9-4c2e-a97b-e23632cd7aa3	the worst program, and I will file a complaint as its updates have caused me to lose some data, and it is still the same. I demand a solution or I will escalate my complaint.	Rana Alyami	##########			0	ar	us		1	ar	bad program file complaint update cause lose data still demand solution escalate complaint	Negative	1	1	0
Google Play Store	2713a896-3e12-4e32-8621-9d5a6e02beb9	Very good.	علي يحي	##########			0	ar	us		5	ar	good	Positive	0	0	0
Google Play Store	f78b7ff5-3e31-4757-9f34-ae1dae8a0754	Under trial	فكري الحكيمي	##########			0	ar	us		5	ar	trial	Neutral	0	1	0
Google Play Store	6d1118b8-7a75-4ac1-af36-0154e03a115c	Raises blood pressure	abdrabh Alwhashi	##########			0	ar	us		5	ar	raise blood pressure	Neutral	1	0	0
Google Play Store	809625c4-3637-4700-8e17-096dfe6e0849	The application does not open directly every time, you must update the application.	Fathe Etman	##########			0	ar	us		3	ar	application open directly every time must update application	Neutral	0	1	0
Google Play Store	a31cf60f-4fe9-40ad-a6f9-68d9e5929971	Publication/display	majed 16	##########			0	ar	us		5	ar	publicationdisplay	Neutral	0	1	0
Google Play Store	16adff8f-8eea-4bdc-86c4-01bc7cdff553	Good application, excellent.	mansor Hadi	##########			0	ar	us		5	ar	good application excellent	Positive	0	0	0
Google Play Store	82f9e8e1-bcc6-436f-ad4e-847e61a930d0	Every time he kicks me out of the account.	Hamy Hamk	##########			0	ar	us		1	ar	every time kick account	Negative	0	1	0
Google Play Store	9476cd9e-2fc2-469e-b4ab-f9a7c7ee0221	There is no harm in it.	Ali Dahem	##########			0	ar	us		2	ar	harm	Neutral	1	0	0
Google Play Store	5b023a38-2d5f-4171-b32a-7b6c1989f6f8	The application is not working.	Yakoop Alabed	##########			0	ar	us		5	ar	application work	Negative	0	1	0
Google Play Store	032e0ec0-a81b-4c97-ae7b-e1d4a30a9aee	Excellent application	جهاد إبراهيم الغامدي	##########			0	ar	us		5	ar	excellent application	Positive	0	0	0
Google Play Store	dd5d3d3b-4ce9-4993-8439-b867dff66018	The application is not functioning after the update, even after opening the website.	Ahmed Ali Jabir	##########			0	ar	us		1	ar	application function update even open website	Negative	0	1	0
Google Play Store	a6b399a0-bfeb-41ad-8426-0e3b8deb3a67	The best program.	ناصر الهديبي	##########			0	ar	us		3	ar	best program	Positive	0	0	0
Google Play Store	1c9acad4-05fd-49c8-9329-895ff7fa9fe6	The application does not open at all.	دلال خواجي	##########			0	ar	us		1	ar	application open	Negative	0	1	0
Google Play Store	69fc7b3f-588c-444b-a600-65fbef70577e	I cannot update my data or the expiration date of my ID.	أسووما فيصل	##########			0	ar	us		1	ar	update data expiration date id	Negative	0	1	0
Google Play Store	fa79679e-e040-412e-82e6-473c6727551d	After the update, the application has become very helpful.	ماجد الصوفي	##########			0	ar	us		1	ar	update application become helpful	Positive	1	0	0
Google Play Store	ee2ea4ed-4e4b-4493-9b0d-880456b239f9	It does not open with me from the main screen, I need to enter from the store.	Mohamed Ahmed	##########			0	ar	us		1	ar	open main screen need enter store	Neutral	0	1	0
Google Play Store	5535ad1c-01c7-43c5-91df-6635bc84b76d	Very good	محمد الشوافي	##########			0	ar	us		5	ar	good	Positive	0	0	0
Google Play Store	826daf28-1515-490e-8b5e-14cdea43225c	The application is not working on the Galaxy G7 prime device after the latest update. Please solve the problem.	m n	##########			4	ar	us		1	ar	application work galaxy g prime device late update please solve problem	Negative	0	1	0
Google Play Store	c1061bef-251c-4dfb-9f29-8d5d73e93b67	The application is not working.	حمزاوي حمزه	##########			0	ar	us		1	ar	application work	Negative	0	1	0
Google Play Store	85999eea-fa5c-41b2-b6ae-8b9e1ce9aaac	The application is very bad after the latest update 👎 and if their goal is to disable people, then they have succeeded in doing so. It is not reasonable that after all those negative comments, they did not rush to solve the problem.	سكاي لايت	##########			0	ar	us		1	ar	application bad late update goal disable people succeed reasonable negative comment rush solve problem	Negative	1	1	0
Google Play Store	336bad0c-9226-4ae2-93da-e4e36698efc8	It does not work.	mero	##########			0	ar	us		1	ar	work	Negative	0	1	0
Google Play Store	51350fa7-a45e-4ce7-9b72-08fa39cf54dd	Excellent and faultless.	ابوصالح	##########			0	ar	us		5	ar	excellent faultless	Positive	1	0	0
Google Play Store	67d91bab-5164-4f85-bb95-677b91618b4f	Excellent very much.	Mohamed Sharef	##########			0	ar	us		5	ar	excellent much	Positive	0	0	0
Google Play Store	a0b73099-fc15-4052-8ca6-65af3d4ce4d8	The applications have become exhausting. I hope to solve the problem.	اسعد عويضه	##########			0	ar	us		5	ar	applications become exhaust hope solve problem	Negative	1	0	1
Google Play Store	43e4b99d-90b1-41cc-b88f-46f7965b3532	The application is not good after the update, it has become annoying. Whenever I enter, the application forces me to open the location to log in. I kindly request you to review the above-mentioned issue and return it to its previous place before the update.	مرحبا	##########			1	ar	us		1	ar	application good update become annoy whenever enter application force open location log kindly request review abovementioned issue return previous place update	Negative	1	1	0
Google Play Store	5e24dcfd-d2db-48f7-923e-16ce99780dbf	It is not working.	Hussain Ali Alzarei	##########			0	ar	us		1	ar	work	Negative	0	1	0
Google Play Store	f53f6afc-eafd-4339-9b1d-dbe344bf5e0f	Excellent experience	Ali Waseli	##########			0	ar	us		5	ar	excellent experience	Positive	0	0	0
Google Play Store	ec207be3-6d2e-407a-9774-c508b636fe7e	The application is not working.	Jamaan Banaeem	##########			0	ar	us		5	ar	application work	Negative	0	1	0
Google Play Store	2f9e905f-2d19-463f-afdd-6c72872ceb4c	The application's commentator doesn't open 💔💔💔💔	Soso Ail	##########			0	ar	us		1	ar	applications commentator doesnt open	Negative	0	1	0
Google Play Store	c642e6d5-5b7d-4f0d-bec6-782800fde7e9	Very helpful application	Mohmad Yosaf	##########			0	ar	us		1	ar	helpful application	Positive	0	0	0
Google Play Store	459d6252-2436-425d-b236-3645136c9741	Excellent application 👍 (｡◕‿◕｡)	سبحان الله	##########			0	ar	us		5	ar	excellent application	Positive	0	0	0
Google Play Store	5bbd73d2-6b73-4527-bcab-844d11c5b508	The application is not working.	عبد الفتاح	##########			0	ar	us		1	ar	application work	Negative	0	1	0
Google Play Store	0e022260-8054-4a2a-bd3c-62ead08018d6	The program only works through Google Maps, and every time you access it, you have to follow this method.	الخلف الخلف	##########			0	ar	us		1	ar	program work google map every time access follow method	Neutral	0	1	0
Google Play Store	b0452605-7b9f-4223-b94e-a1c4ddf77794	Excellent	ابو مشاري	##########			0	ar	us		5	ar	excellent	Positive	0	0	0
Google Play Store	59707c97-c27b-4eef-a399-b6b644b6d3f2	Excellent program 100%100.	Abdul Rahim Al Hazmi	##########			0	ar	us		5	ar	excellent program	Positive	0	0	0
Google Play Store	4f731c13-c3c0-4635-8c71-46a77e769d7f	I prayed on the Prophet today 🤍🌹	سيمو العتيبي	##########			0	ar	us		4	ar	pray prophet today	Positive	1	0	0
Google Play Store	737a93fa-5c54-4fd2-8781-dd666295ab50	He deserves a billion stars.	M My	##########			0	ar	us		5	ar	deserve billion star	Positive	1	0	0
Google Play Store	dfb37dcd-2fef-4f0c-819c-31a79004e111	May God be my guardian, what is happening to you with us? The application has become very bad. It hasn't been working for three days. Please update it properly.	Arshajona Ali sarwar	##########			0	ar	us		1	ar	may god guardian happen us application become bad hasnt work three days please update properly	Negative	1	1	0
Google Play Store	a2961397-832e-4195-8526-5db80d7c74a3	After the latest update, the application only works after activating the geolocation, with every login. This is very annoying, and it is not the bank's right to demand and force us to do so! We kindly request the developers of the application to review this and cancel it in the next update.	أم عزام	##########			132	ar	us		1	ar	late update application work activate geolocation every login annoy bank right demand force us kindly request developers application review cancel next update	Negative	0	1	0
Google Play Store	18bad996-a67a-4ebb-910f-dc66f150ff5b	Honestly, the application is very slow. I want to update my personal information, but it takes a long time and the date that appears is incorrect. We hope that the management of Al-Ahli Bank will improve their services.	Am Am	##########			0	ar	us		1	ar	honestly application slow want update personal information take long time date appear incorrect hope management alahli bank improve service	Negative	1	1	1
Google Play Store	e1371462-827e-4900-9ff0-7a264d92f9e4	Difficulty in modifying the name in English	Ortal High	##########			0	ar	us		1	ar	difficulty modify name english	Neutral	1	0	1
Google Play Store	1c95fc9b-d8f0-48b2-87f9-2c1620d13114	Good	عماد عبيد	##########			0	ar	us		3	ar	good	Positive	0	0	0
Google Play Store	f7630cdf-baf4-4ef2-b3fa-4928ca9d6d5a	The application is extremely the worst and does not work. I have tried it more than once and deleted it, then re-downloaded it and still faced the same problem.	Hglksd 3963	##########			0	ar	us		1	ar	application extremely bad work try delete redownloaded still face problem	Negative	1	1	0
Google Play Store	08c43015-43f9-4d65-a27f-d79f4fe67b0b	The new update is very unsuccessful and the program should be reconsidered or there is no purpose for it to be on the device.	Hatem ALhrde	##########			0	ar	us		1	ar	new update unsuccessful program reconsider purpose device	Negative	1	1	0
Google Play Store	f0ab5b94-f501-4ee5-ad7c-9898067016cb	Bad application and the worst bank 👎👎👎👎 It keeps hanging and is extremely bad 👎👎👎👎👎	Ibrahem Elsa3di	##########			0	ar	us		1	ar	bad application bad bank keep hang extremely bad	Negative	1	0	1
Google Play Store	e5bd3e34-d046-4a8a-b595-c4f73868ecad	It hangs.	am eabdalllah	##########			0	ar	us		3	ar	hang	Neutral	0	0	1
Google Play Store	5d85b238-55ac-4322-aa51-a9a73141a221	Very wonderful	Gff Ffg	##########			0	ar	us		5	ar	wonderful	Positive	0	0	0
Google Play Store	35b7bfff-57d9-4b8a-9185-29e0a5b6bf4d	Easy	محمد الصاعدي	##########			0	ar	us		5	ar	easy	Positive	0	0	0
Google Play Store	2fedd4bb-b340-4296-a44e-03cad64ba9da	An amazing experience that I have never encountered before in dealing with.	الشيخ مسفر فاضل الحذيفي	##########			0	ar	us		5	ar	amaze experience never encounter deal	Positive	1	0	0
Google Play Store	2baabd81-36b8-41c5-8146-1035f7a91197	Excellent very much.	عايض الشهري	##########			0	ar	us		5	ar	excellent much	Positive	0	0	0
Google Play Store	356b4217-fd51-49d2-b501-13fd667ba4c9	The best thing	Kakashi Sense	##########			0	ar	us		5	ar	best thing	Positive	0	0	0
Google Play Store	01676369-d3ae-43fe-a644-cbc16398317a	Very excellent	Play Store	##########			0	ar	us		5	ar	excellent	Positive	0	0	0
Google Play Store	4a92a930-1906-4c31-b802-7803d9c48023	The first one is good.	Ahmed Hassan	##########			0	ar	us		1	ar	first one good	Positive	1	0	0
Google Play Store	3c44a9c2-7d6a-4736-9745-b359dbfafe95	The passport has only 8 characters, if your password is longer, you won't be able to access your account.	Mosa Almajd	##########			0	ar	us		1	ar	passport character password long wont able access account	Neutral	0	1	0
Google Play Store	73f894db-0eea-4f69-9eed-90a7983538e3	I wish the person in charge of Al Ahli Bank in Mahayel Asir city would be changed today. Since 11 AM, the self-service ATMs have been out of service in both branches, and the customer service at Al Rajhi Bank is 100% better. The Ahli Bank employees seem to think of themselves as ministers in terms of their positions.	Matr ALhazazi	##########			0	ar	us		1	ar	wish person charge al ahli bank mahayel asir city would change today since selfservice atms service branch customer service al rajhi bank good ahli bank employees seem think minister term position	Negative	1	0	0
Google Play Store	8cac1a85-00de-4232-8afa-2914b545d013	Admiration	محمد سيد	##########			0	ar	us		5	ar	admiration	Positive	0	0	0
Google Play Store	305aa0e5-b76c-415c-818d-f71b64d045ea	The application has become very exhausting and I cannot log in. Even if I manage to log in, the application forces me to open the geolocation to log in, which is not appropriate for a bank of your size. I request you to review this defect and not to force users to open the geolocation to log in, even if it is in the customer's favor. It is absolutely not acceptable and very annoying. I hope you l…	ahmed-alyamani	##########			23	ar	us		1	ar	application become exhaust log even manage log application force open geolocation log appropriate bank size request review defect force users open geolocation log even customers favor absolutely acceptable annoy hope look matter thank	Negative	1	1	0
Google Play Store	62e307fe-b8d7-4572-8282-8d7846e94cf4	Excellent, this application.	علي دغاس	##########			0	ar	us		5	ar	excellent application	Positive	0	0	0
Google Play Store	bc6e39bc-d6c2-4d7c-9ba1-19c3746245c2	Very good.	احمد الحربي	##########			0	ar	us		5	ar	good	Positive	0	0	0
Google Play Store	02588a58-0754-436e-8209-3d34b6cbdebc	There is no satisfaction without a star.	بدر الخثعمي	##########			0	ar	us		1	ar	satisfaction without star	Positive	1	0	0
Google Play Store	7ab2332b-f01a-4f2a-8873-60a1e9cdcaa1	"Tamtaz" can be translated to English as "distinct" or "distinguished".	عادل عادل	##########			0	ar	us		5	ar	tamtaz translate english distinct distinguish	Neutral	1	0	0
Google Play Store	98c3b92e-7c2f-4c74-b999-86cc6aefc191	bad	محمد العنزي	##########			0	ar	us		1	ar	bad	Negative	1	0	0
Google Play Store	2ef7de9e-cac3-4516-8752-38262e2f897f	"It doesn't work for me most of the time, and I swear I'm tired of uninstalling, reinstalling, deleting, and downloading again. It's no use."	SooSoo SooSoo	##########			0	ar	us		1	ar	doesnt work time swear im tire uninstalling reinstall delete download use	Negative	0	1	0
Google Play Store	0e10f901-428e-441a-9415-e444507c923d	After the latest update, the application is not working. It gives me a message saying, "We apologize, but currently unable to operate."	ابو فهد العتيبي	##########			0	ar	us		1	ar	late update application work give message say apologize currently unable operate	Negative	0	1	0
Google Play Store	9b87f598-43e3-4246-b764-e1be5bd0e6dd	Excellent	عبدالله الشهري	##########			0	ar	us		5	ar	excellent	Positive	0	0	0
Google Play Store	e90abe8e-5114-4936-ba45-aabafe5ab844	Excellent, I noticed that I receive messages of transfers, donations, and thanks for transfers, but I do not receive messages from the bank on my phone number. Thank you.	زهير البارقي07	##########			0	ar	us		5	ar	excellent notice receive message transfer donations thank transfer receive message bank phone number thank	Positive	0	0	0
Google Play Store	ddd028fd-a01b-4228-921a-4f034256ce35	Excellent	Japer Masawd	##########			0	ar	us		5	ar	excellent	Positive	0	0	0
Google Play Store	f2ed7926-a484-4257-b977-91d46e086b6e	Okay	عبده البرعي	##########			0	ar	us		5	ar	okay	Positive	0	0	0
Google Play Store	f23ca052-5bac-4e5a-953b-9a34e3565f0c	"The application is always under maintenance and not working. Find a solution for it."	نوف ف	##########			0	ar	us		1	ar	application always maintenance work find solution	Negative	0	1	0
Google Play Store	a1ff1c47-aa25-48ac-a0be-e57a2169539b	The application is not working after the update. Please solve the problem.	علي محمد	##########			3	ar	us		1	ar	application work update please solve problem	Negative	0	1	0
Google Play Store	69e68188-e3cc-45fb-b4c1-2708d9a66455	The experience is excellent.	الحربي الحربي	##########			0	ar	us		5	ar	experience excellent	Positive	0	0	0
Google Play Store	2475f1e2-54ee-4f9e-a99c-348658bb5072	Those with low income are prohibited from using the application, they must go to a mobile banking branch for those with excellent and strong income. Others are being annoyed by the location tracking, a collective complaint must be filed to the Ministry of Finance.	Saleh Alzahrani	##########			0	ar	us		1	ar	low income prohibit use application must go mobile bank branch excellent strong income others annoy location track collective complaint must file ministry finance	Negative	1	1	0
Google Play Store	a8b217ed-8b88-4008-8773-8bd7d34ba867	The worst experience was with AlAhli Bank services in general. May Al-Rajhi be victorious.	Abdulrahman Zuhairi	##########			0	ar	us		1	ar	bad experience alahli bank service general may alrajhi victorious	Negative	1	0	0
Google Play Store	7063c3a2-4996-4e95-915b-3266e53fa697	Al Ahli mobile application is distinctive.	عبدوه ابو اسامه	##########			0	ar	us		5	ar	al ahli mobile application distinctive	Positive	1	0	0
Google Play Store	a0dffd87-074e-43db-a221-5818eb70a02d	Very excellent, may God bless you.	ahmad almadane	##########			0	ar	us		5	ar	excellent may god bless	Positive	1	0	0
Google Play Store	8134fb38-2b5f-421d-bc45-94cff14fbc61	The update is bad and prevents us from accessing the application.	الشتاء ألدافئ للقلوب	##########			0	ar	us		1	ar	update bad prevent us access application	Negative	1	1	0
Google Play Store	cb4cb5fd-4965-4cb3-9b8b-898fcc5d0eac	It does not work.	geras	##########			0	ar	us		1	ar	work	Negative	0	1	0
Google Play Store	fd09a1d5-b1dc-44b7-9d5e-4e6b3ac1c058	Masha Allah	حصوص ص	##########			0	ar	us		5	ar	masha allah	Positive	0	0	0
Google Play Store	2cec5b7f-2691-45b0-99bb-8239aac67f3d	After the update, very bad comments and exiting the application.	wael Abu aseer	##########			0	ar	us		1	ar	update bad comment exit application	Negative	1	1	0
Google Play Store	6d5229da-9905-4b72-a5fd-5ad0a1b5960e	It is no longer opening after the new update.	بسام الحكيم	##########			0	ar	us		1	ar	long open new update	Neutral	0	1	0
Google Play Store	5a84022a-39df-4533-83d4-6f5564038814	It is done.	Mohammed Osman	##########			0	ar	us		5	ar	do	Neutral	0	1	0
Google Play Store	3b8c58bb-45c9-41b1-83b5-5b1fa8f22687	The application is very bad after the latest update. It hangs, requests the geographic location, and doesn't open at all. Our work has been disrupted, and we are waiting for the program to be fixed.	ARMY BTS	##########			0	ar	us		1	ar	application bad late update hang request geographic location doesnt open work disrupt wait program fix	Negative	1	1	1
Google Play Store	0acb855e-80b8-47f3-a13f-3d096d5c55d3	Bad in every aspect, until now he refuses to come since Thursday, things haven't improved, I swear to God.	هند الهذلي	##########			0	ar	us		1	ar	bad every aspect refuse come since thursday things havent improve swear god	Negative	1	1	0
Google Play Store	c79774c3-fb87-482f-9d6e-e8d4d831fb6e	Hello program	عائدداود السلمي	##########			0	ar	us		5	ar	hello program	Neutral	0	1	0
Google Play Store	98d9eca6-d95b-4776-bdb1-ef269d9e4aa4	Very good, excellent, good luck! ✌️✌️	حامد بازوقه	##########			0	ar	us		5	ar	good excellent good luck	Positive	0	0	0
Google Play Store	c25bcbf7-327e-4a38-8d63-44aca57670cf	The new update is bad and asks for location.	Jo Ksa	##########			0	ar	us		1	ar	new update bad ask location	Negative	1	0	0
Google Play Store	5bed7052-edd3-43d0-8b34-56c7841e75a9	Good job	H .h	##########			0	ar	us		5	ar	good job	Positive	0	0	0
Google Play Store	34fbc9df-169c-48d9-9a50-934d04b1c4cc	The application is not working. We hope to resolve the problem as soon as possible.	عبدالله الرويلي	##########			0	ar	us		1	ar	application work hope resolve problem soon possible	Negative	0	1	0
Google Play Store	a1cc61fc-c1d7-46e3-8bc2-45b445f4f0fb	Al Ahli except the descending road.	Nice 1	##########			0	ar	us		1	ar	al ahli except descend road	Neutral	0	1	0
Google Play Store	4411765f-79c5-4ed5-8d9f-1c4e2d609f2c	The application is not working with the update, it does not open anymore.	mohammed	##########			0	ar	us		1	ar	application work update open anymore	Negative	0	1	0
Google Play Store	417c47dc-999c-4e30-acc6-3b7aedc1663f	You've rent for us apartments with updates.	moka 95	2023-09-09 07:32:00			1	ar	us		1	ar	youve rent us apartments update	Neutral	0	1	0
Google Play Store	263ff3f5-ba64-410d-ae37-11e3130b311d	The application has become very boring, there are updates all the time... It forces me to open the geographic location, I don't know what's important, but the bank must see my location... The old update was better. 👎	Sami alal	2023-09-09 07:15:00			1	ar	us		1	ar	application become bore update time force open geographic location dont know whats important bank must see location old update good	Negative	1	1	0
Google Play Store	db4bcc18-32f9-4254-b81a-f5be200a7640	The application is not working, find us a solution.	عبدالله اليامي	2023-09-09 07:03:00			1	ar	us		1	ar	application work find us solution	Negative	0	1	0
Google Play Store	15223e84-32e5-4cb9-ad9f-fa2cc6dbef7b	The application is experiencing a problem after the latest update.	Nayff Nasr	##########			1	ar	us		1	ar	application experience problem late update	Negative	0	1	0
Google Play Store	68512b14-a2a6-4424-9b3f-9e614c1127a1	The application is all problems.	محمد	##########			0	ar	us		1	ar	application problems	Negative	0	1	0
Google Play Store	cf2c2479-e7a5-4237-a3ff-28a7055ecaea	Most of the time, it does not work.	ابو حمـــد	##########			1	ar	us		1	ar	time work	Negative	0	1	0
Google Play Store	620a316f-1d18-41cc-9323-5045e5956612	Good.	Ahmed khaled	##########			0	ar	us		5	ar	good	Positive	0	0	0
Google Play Store	8fad844f-2c05-444f-8a9a-420f418d1f01	The experience of the new update is a waste. The application doesn't work at all, it exhausts me, and God knows it doesn't even open or do anything, it seems like it's not working at all. I seek forgiveness from Allah and repent to Him three times. I deleted it and installed it again.	Hossam mostafa حسام مصطفي	##########			0	ar	us		1	ar	experience new update waste application doesnt work exhaust god know doesnt even open anything seem like work seek forgiveness allah repent three time delete instal	Negative	1	1	0
Google Play Store	7cc88cc5-098d-4774-9a44-c6bb304b938e	Very bad.	Gh Z	##########			1	ar	us		1	ar	bad	Negative	1	0	0
Google Play Store	3953628b-5ec1-44c3-a4a8-665fc3d18187	Great bank and excellent service	nasser sabahi	##########			0	ar	us		5	ar	great bank excellent service	Positive	0	0	0
Google Play Store	59ce4b65-c628-43a0-8dd2-5142d20116a4	After the update, it is not working.	غازي القطواني	##########			0	ar	us		5	ar	update work	Negative	0	1	0
Google Play Store	d3529e21-cfb8-46d7-945c-1db1647a8e84	Bad	ابن فرحان ال علي	##########			1	ar	us		1	ar	bad	Neutral	1	0	0
Google Play Store	874d21bc-4ed7-4525-b05a-929d9dbd3d9c	The application encountered a problem after the latest update on the bank logo, and it is not letting me in. What is the solution?	Saoud Alfaraj	##########			1	ar	us		1	ar	application encounter problem late update bank logo let solution	Negative	0	1	0
Google Play Store	2cfb3999-decb-4858-8160-f2373a0ebdd5	Does not meet the standards to be a banking application.	osama aldathry	##########			1	ar	us		1	ar	meet standards bank application	Negative	0	0	0
Google Play Store	efdbc849-00e4-4093-b4f1-2a459f8f5356	Greetings. Why can't I use it without specifying the location?	NoN SNA	##########			1	ar	us		1	ar	greetings cant use without specify location	Neutral	0	1	0
Google Play Store	3063f92e-2f8e-45b1-a706-e08b079f1a1f	"Masha Allah Tabarak Allah." It is a phrase in Arabic that is used to express admiration or praise for the beauty, excellence, or blessings of something or someone. It is often said when seeing or hearing about something good or impressive. In English, it can roughly be translated as "May Allah bless it" or "What Allah has willed, blessed be it."	محمد فلاته	##########			0	ar	us		3	ar	masha allah tabarak allah phrase arabic use express admiration praise beauty excellence blessings something someone often say see hear something good impressive english roughly translate may allah bless allah will bless	Positive	1	0	0
Google Play Store	6f9de84e-b938-492f-8726-e369f8a6b4e8	Thank you Ahli (a bank or a football club in Arabic) for this special, very beautiful, and excellent application. It is trustworthy, worth downloading, always secure with high-quality service for all customers. We appreciate your cooperation.	ناصر شاجري	##########			0	ar	us		5	ar	thank ahli bank football club arabic special beautiful excellent application trustworthy worth download always secure highquality service customers appreciate cooperation	Positive	0	0	0
Google Play Store	6aa7ea8c-2e44-4850-81e0-7a38e72bee23	"Trash and worst application"	Hussain Alsharif	2023-09-08 09:50:00			1	ar	us		1	ar	trash bad application	Negative	1	0	0
Google Play Store	1a442624-93d1-460e-b531-ff49c369f454	The application does not open unless the location is specified. What is the surveillance system?	عمر الفهمي	2023-09-08 08:06:00			1	ar	us		1	ar	application open unless location specify surveillance system	Neutral	0	1	0
Google Play Store	5e0883a3-07eb-4413-a757-3c3652b12442	Very excellent	عبدالفتاح الحاتمي	2023-09-08 03:42:00			0	ar	us		5	ar	excellent	Positive	0	0	0
Google Play Store	5870ceb9-45c5-417e-8264-c8d2ca137e36	Excellent	aljasy 2030	2023-09-08 01:33:00			0	ar	us		5	ar	excellent	Positive	0	0	0
Google Play Store	78a93f0c-dcdc-4c65-a5ea-c984bd82a677	Very bad and gets stuck a lot.	ايمن الركب	##########			1	ar	us		1	ar	bad get stick lot	Negative	1	0	1
Google Play Store	e6ca840a-0520-4bc6-9f43-1c6639c60b66	Why is the program not installing? If it fails, it cannot be updated. What is the problem?	رشاد العليمي	##########			0	ar	us		1	ar	program instal fail update problem	Negative	0	1	0
Google Play Store	b38e9da8-05a3-46d5-a776-67c13bf0ad07	Recently, it has become very heavy, and when adding a local beneficiary, it does not accept it and shows that the format you entered is incorrect.	Khaleel ksh	##########			3	ar	us		1	ar	recently become heavy add local beneficiary accept show format enter incorrect	Negative	0	0	1
Google Play Store	956174fa-af3e-407e-8900-f7018435eba2	Why won't the application open? What is the problem? It gives me a message apologizing for the inconvenience. Please update... I made the update but it still won't open. We apologize for the inconvenience. Why? Can you help me understand?	Roby ahmed	##########			2	ar	us		1	ar	wont application open problem give message apologize inconvenience please update make update still wont open apologize inconvenience help understand	Negative	0	1	0
Google Play Store	c7bad542-aedd-4f4b-ab5b-fc760764b253	After the update, it no longer logs in and displays an error message saying there is a server error (asterisk because I am stuck).	zoro Hero	##########			9	ar	us		1	ar	update long log display error message say server error asterisk stick	Negative	0	1	0
Google Play Store	288722f1-aba1-4c3c-a602-28b92e7f9979	Excellent.	Eslam Dabash	##########			0	ar	us		5	ar	excellent	Positive	0	0	0
Google Play Store	d70237f5-70c7-4f2b-b85c-43777c0bcdca	Good.	محمد سيد	##########			0	ar	us		5	ar	good	Positive	0	0	0
Google Play Store	1a5d343f-1f22-4378-abda-1b072a79f0db	Very bad after the update, as I deleted it and reinstalled it, but the problem still persists. It keeps asking for the location. Please solve the problem. The purpose of using the application is to avoid congestion and waiting, and to facilitate and accomplish things on time, not to delay and waste time.	Saud Alamri	##########			3	ar	us		1	ar	bad update delete reinstall problem still persist keep ask location please solve problem purpose use application avoid congestion wait facilitate accomplish things time delay waste time	Negative	1	1	1
Google Play Store	9b4a10b1-e1b9-4d42-97bc-d380171055fa	Very nice	الاوائل للالمنيوم ابواب شبابيك استركشر شتر الاوائل	##########			0	ar	us		5	ar	nice	Positive	0	0	0
Google Play Store	12de0a88-5aa9-4c1a-8aab-37ac9ccbccd5	There are many updates and extremely poor service after the latest update, it keeps hanging and never opens. Now it is necessary to activate the website. It's illogical, what does the bank have to do with the website? Oh how great you are, Al Rajhi Bank.	tadeldel	##########			1	ar	us		1	ar	many update extremely poor service late update keep hang never open necessary activate website illogical bank website oh great al rajhi bank	Negative	1	1	1
Google Play Store	d4db733e-f2fe-448d-bb8f-1db087e204e4	"May Allah be displeased with Al-Rajhi Bank."	Alaser Alhdadi	##########			0	ar	us		1	ar	may allah displease alrajhi bank	Negative	1	0	0
Google Play Store	0ebac085-9a8d-4110-abd0-204ea3b79da5	The application started requesting to enable the location, and when the location is enabled, it does not open at all. It keeps requesting to enable the location, and my work has been disrupted. May Allah be my helper, there is no power or strength except in Allah, the Most High, the Almighty.	drai hamid	##########			1	ar	us		1	ar	application start request enable location location enable open keep request enable location work disrupt may allah helper power strength except allah high almighty	Negative	1	1	0
Google Play Store	6b17e6b0-4505-4f4d-bcba-502cb5b8e2d8	Why does the website violate privacy?	المهند	##########			0	ar	us		1	ar	website violate privacy	Negative	1	0	0
Google Play Store	fdcc6f63-fc48-4f73-ae42-258650059e8d	Unfortunately, the update is bad, it hangs and asks to activate the sites, and in the end, the application does not open!	hass d	##########			5	ar	us		1	ar	unfortunately update bad hang ask activate sit end application open	Negative	1	1	1
Google Play Store	63b862f2-7b05-4a80-9a74-a201cad57b58	The program is no longer working.	Ali Broo	##########			1	ar	us		1	ar	program long work	Negative	0	1	0
Google Play Store	85db2b07-7afc-4ec6-af6f-55692389fb8b	The application is not working. Did you update it or did you damage it? What is the solution? How can I open the application?	Emad Abdelhady	##########			1	ar	us		1	ar	application work update damage solution open application	Negative	0	1	0
Google Play Store	33cc9bba-9b5f-4b32-94a7-43a6e2b7ffaa	Easy and safe	نايف الغامدي	##########			0	ar	us		5	ar	easy safe	Positive	0	0	0
Google Play Store	65c65c1b-55bc-4934-b734-0075a9f14a1f	The application is excellent, but there is a problem with the update, sometimes it freezes, and there is a problem with the geolocation.	د /عبدالرحمن آل شليل	2023-09-07 09:52:00			0	ar	us		5	ar	application excellent problem update sometimes freeze problem geolocation	Negative	1	1	1
Google Play Store	58a8479c-5230-4572-b49a-93fb3e551f89	This application is not functioning.	حمد اليامي	2023-09-07 09:17:00			1	ar	us		1	ar	application function	Negative	0	1	0
Google Play Store	1a727572-1363-4c84-b9d1-5f6af74ae04a	After the update, it does not work.	hmza abo alazem	2023-09-07 08:31:00			1	ar	us		3	ar	update work	Negative	0	1	0
Google Play Store	49228d6e-542c-4548-8e91-4c834be71f24	Does not send the activation code.	احمد سليم	2023-09-07 08:25:00			1	ar	us		1	ar	send activation code	Neutral	0	1	0
Google Play Store	0648fc66-2214-494f-aa47-2be7a5befed2	He doesn't want to work.	Said Saba	2023-09-07 07:03:00			1	ar	us		1	ar	doesnt want work	Negative	0	1	0
Google Play Store	f71e0ebe-5ee6-4ae8-97b5-f591de1865c0	Beautiful	عادل خميس	2023-09-07 06:53:00			0	ar	us		5	ar	beautiful	Positive	0	0	0
Google Play Store	e2537d2b-2e3b-4e15-a5d5-be11a1a703d9	What's the issue with location detection?!!!!! The app doesn't open 😡😡😡😡	Mona Ksa	2023-09-07 06:17:00			1	ar	us		1	ar	whats issue location detection app doesnt open	Negative	0	1	0
Google Play Store	7e2efd34-5e92-4950-95a5-384c5a34292b	Good.	ابو عبدالله ابو عبدالله	2023-09-07 06:08:00			0	ar	us		5	ar	good	Positive	0	0	0
Google Play Store	ec9fdeb4-c936-4c21-aafc-14ae3b1e556c	Please help, we need assistance from the users because these developers are not responding to us. The problem is that the application does not open after the latest update. If it takes longer to open, a message saying "connection unsuccessful" appears and the application does not open.	movie say	2023-09-07 04:50:00			2	ar	us		1	ar	please help need assistance users developers respond us problem application open late update take long open message say connection unsuccessful appear application open	Negative	0	1	0
Google Play Store	0278c4fa-e184-44e8-a3d8-63df15569fff	Excellent.	هناء سلمان المريحل	2023-09-07 04:44:00			0	ar	us		5	ar	excellent	Positive	0	0	0
Google Play Store	682f8e5a-9e3a-4dec-9850-f6f8d20d222a	The application is not working at all, and I don't know what the problem is. It did not open for me this time. Please find a solution for me, even though it was working before without any issues. We kindly ask for assistance.	الشجب فودافون	2023-09-07 04:14:00			1	ar	us		1	ar	application work dont know problem open time please find solution even though work without issue kindly ask assistance	Negative	0	1	0
Google Play Store	eba35208-53f4-4d01-85e1-55c77a27d76c	After the new update, the program does not work. I tried uninstalling and reinstalling it, but it still does not work.	ماجد حمد	##########			17	ar	us		1	ar	new update program work try uninstalling reinstall still work	Negative	0	1	0
Google Play Store	2ba4854f-071d-46c6-b914-0fc43df55bb6	Speed of service and clarity...	Mim Nos	##########			0	ar	us		5	ar	speed service clarity	Positive	0	0	0
Google Play Store	ac8ebc7c-52a5-4335-a969-e10bad68b147	Excellent application	عبدالرحمن الحناني	##########			0	ar	us		5	ar	excellent application	Positive	0	0	0
Google Play Store	8c43d9cc-c38a-43b6-844d-8bc166094c1a	"All services are fine."	حسين المحمادي	##########			1	ar	us		1	ar	service fine	Positive	0	0	0
Google Play Store	31a3fb29-7e76-4a8a-a90b-239bdf80a63f	The application is not working, I have deleted it twice and reinstalled it, but it still doesn't work. Please solve the problem.	وسيم صنعاني	##########			4	ar	us		1	ar	application work delete twice reinstall still doesnt work please solve problem	Negative	0	1	0
Google Play Store	5fae8628-e8fc-484c-8877-5adf16f1996b	Thank you.	قاسم	##########			0	ar	us		5	ar	thank	Positive	0	0	0
Google Play Store	00a6a2a3-b410-4dc0-b5dc-be055bf855c1	Running the website is none of your business.	ابو دانه	##########			1	ar	us		1	ar	run website none business	Negative	0	1	0
Google Play Store	4c55236e-88b9-452d-a582-59f4e2659c5c	Good	ابوهمام	##########			0	ar	us		5	ar	good	Positive	0	0	0
Google Play Store	5a7ecd70-573e-4298-bf3b-e28d4ab695dc	Good.	محمود البراهيم	##########			0	ar	us		5	ar	good	Positive	0	0	0
Google Play Store	7259308d-e238-45a8-ae62-c1e032506d25	What is this website for? It should be functional. You should develop it and make it usable for foreigners from any country they travel to. Instead of making it more complicated.	سالم سعيد	##########			1	ar	us		1	ar	website functional develop make usable foreigners country travel instead make complicate	Neutral	1	1	0
Google Play Store	0cf4e84d-3253-4423-ab69-b16f4fe05318	Your updates are very bad.	هادي الهاجري	##########			1	ar	us		1	ar	update bad	Negative	1	0	0
Google Play Store	f7bef105-90c0-4a27-acac-61000504dc5c	Unfortunately, after the update, it worked for a few days and then started freezing and a message appears saying that it cannot access the server.	عمار العيسائي	##########			0	ar	us		2	ar	unfortunately update work days start freeze message appear say access server	Negative	0	1	1
Google Play Store	38ebd7d6-6ecc-45df-8f4c-66d71621cb34	Their application is the worst.	احمد الزبيدي	##########			1	ar	us		1	ar	application bad	Negative	1	0	0
Google Play Store	fa4599bd-a84f-4be0-ab62-d1f045502090	The application is garbage, and the bank's services are garbage. Messages are delayed for hours, and customer service is bad.	anwar kh	##########			0	ar	us		1	ar	application garbage bank service garbage message delay hours customer service bad	Negative	1	0	1
Google Play Store	c55ab2d6-c32e-4b52-895a-de5c698a7956	For the regular user, it is a bit difficult.	فيصل العتيبي	##########			0	ar	us		1	ar	regular user bite difficult	Neutral	1	0	0
Google Play Store	14cb7b30-e79e-48a4-87ce-361df1cb83bf	Beautiful	طارق المنصوري	2023-09-06 09:53:00			0	ar	us		5	ar	beautiful	Positive	0	0	0
Google Play Store	a6ffcf55-d572-4b69-87bf-1670442bb864	Excellent	Makki makki	2023-09-06 09:00:00			0	ar	us		5	ar	excellent	Positive	0	0	0
Google Play Store	a6690142-53c5-4a99-924b-2c3264be792b	My account has been hacked for the nth time.	عبدالاله عبدالله خميس الشهري	2023-09-06 08:57:00			1	ar	us		1	ar	account hack nth time	Negative	0	1	0
Google Play Store	fa5aea81-fdfa-43ee-8914-d945c3a40482	jghgj	بندر السامعي	2023-09-06 08:54:00			1	ar	us		1	ar	jghgj	Neutral	0	0	0
Google Play Store	7a99e96f-2d86-40c5-872e-f2db10bb0390	The update is very bad.	Hamid Alrewethi	2023-09-06 08:40:00			0	ar	us		5	ar	update bad	Negative	1	0	0
Google Play Store	528d737c-21a8-4f80-bcea-ad6d8a834a67	Bad update, late messages, not to mention that the location feature is not working.	s.4ly4mi	2023-09-06 08:33:00			1	ar	us		1	ar	bad update late message mention location feature work	Negative	1	1	0
Google Play Store	8a087aec-f2f6-4669-8903-abe793e89d3a	Easy	Shosho Basheer	2023-09-06 08:16:00			0	ar	us		5	ar	easy	Positive	0	0	0
Google Play Store	f37779f8-9623-473a-8edb-1f033bfeb30b	It has become mandatory to activate the GPS to access the application.	أسامة	2023-09-06 07:37:00			1	ar	us		1	ar	become mandatory activate gps access application	Neutral	0	1	0
Google Play Store	cbfa0a31-fd44-4b99-add1-901838e13e27	Excellent and easy to use.	Ebrahim Asiri	2023-09-06 06:24:00			0	ar	us		5	ar	excellent easy use	Positive	0	0	0
Google Play Store	1252cf3f-87ef-477d-87ea-1de2583eefd2	They saved us a lot, but it is supposed to be developed like Al Rajhi Bank, with easy transactions.	ابوسلمان المسبحي Aboo قناه يوتيوب Salman	2023-09-06 05:58:00			0	ar	us		5	ar	save us lot suppose develop like al rajhi bank easy transactions	Neutral	0	0	0
Google Play Store	b436d786-5ce2-4740-ab03-79835603d065	Under experimentation	سحنون عبدالرحيم	2023-09-06 04:27:00			0	ar	us		5	ar	experimentation	Neutral	0	0	0
Google Play Store	8dab96af-bcb3-4af0-b1d8-d478a3e0fae3	Good	Rafeq Akory	2023-09-06 04:13:00			0	ar	us		5	ar	good	Positive	0	0	0
Google Play Store	9c674e50-cdcc-4bca-a759-7e112fca2080	Stupid update.	mohammed alruwaili	2023-09-06 03:59:00			1	ar	us		1	ar	stupid update	Negative	1	0	0
Google Play Store	8cad2901-1fc6-44de-ad65-87344438a343	But their support and assistance service is slow, and they need training in customer service techniques and providing service as quickly as possible and in the best way.	عبدالعزيز العصفور	2023-09-06 02:04:00			3	ar	us		5	ar	support assistance service slow need train customer service techniques provide service quickly possible best way	Negative	0	0	1
Google Play Store	28dee66a-de62-4509-bd91-88f1f67fca66	Good.	Osman Bukhari	2023-09-06 01:54:00			0	ar	us		2	ar	good	Positive	0	0	0
Google Play Store	48ee83b6-fa4d-4be3-9847-d6478ad03e16	If there was a description for less than bad, I would give it to the application.	A H M E D	##########			1	ar	us		1	ar	description less bad would give application	Neutral	1	0	0
Google Play Store	b38e74d7-4ce6-4ffe-bf53-c8d7ea1d3462	Thank you very much for your efforts in improving the program to reduce the burden on citizens with your services.	محمد البحري	##########			0	ar	us		5	ar	thank much efforts improve program reduce burden citizens service	Positive	1	0	0
Google Play Store	f184d156-7060-44fc-821e-5b4121a93f28	I'm frustrated because I am dealing with the worst and complicated application that crashes and works for a day and then stops for two days and so on. When I call them, they respond coldly and irritate you, making you wonder why you are putting up with this bank!!	abdullah abdulah	##########			1	ar	us		1	ar	im frustrate deal bad complicate application crash work day stop two days call respond coldly irritate make wonder put bank	Negative	1	1	1
Google Play Store	155c3eac-875c-4d51-bc8d-4e304cf6d8e1	The application is not working and very slow and poor. Can I know why?	Ibrahim Hafez	##########			1	ar	us		2	ar	application work slow poor know	Negative	1	0	1
Google Play Store	b6c221d5-f90a-4774-90c8-0109f7bd4f49	The application is bad and it crashes a lot.	ANRM AHMAD	##########			1	ar	us		1	ar	application bad crash lot	Negative	1	1	0
Google Play Store	f364c460-b406-4d7a-ad8b-af7914981a7c	Worst application. It doesn't open, it ruins everything. How can a bank the size of Al-Ahli not have a functional application? What kind of developer did they hire? It's extremely frustrating and they don't solve problems quickly.	حسن العلي	##########			0	ar	us		1	ar	bad application doesnt open ruin everything bank size alahli functional application kind developer hire extremely frustrate dont solve problems quickly	Negative	1	1	0
Google Play Store	1d4b0720-8d6a-4de7-a275-cecd058dcce0	I enter my correct information and it tells me there is an error in the password and I am sure it is correct. I hope they fix this error.	عبدالمجيد المالكي	##########			0	ar	us		1	ar	enter correct information tell error password sure correct hope fix error	Neutral	0	1	0
Google Play Store	b64b3cea-3bbe-4c13-a233-5ddcc617aacb	often hangs out	زاهد امين	##########			0	ar	us		5	ar	often hang	Neutral	0	0	1
Google Play Store	5ae88117-477b-4941-902f-67b6349d9fbe	Good 👍	Ksa Ksa3	##########			0	ar	us		5	ar	good	Positive	0	0	0
Google Play Store	e266fbde-1e04-41b5-a407-ad4fda345336	"The application is very bad, every time I download it, it does not open for me."	rowa ahmed	##########			0	ar	us		1	ar	application bad every time download open	Negative	1	1	0
Google Play Store	b3fe5bc5-3945-41d9-b11e-390032a60c16	Fix the malfunctions of the billiards and the damn website. I've been trying to log in for two days and it's not working.	Sky Sky	##########			1	ar	us		1	ar	fix malfunction billiards damn website ive try log two days work	Negative	0	1	0
Google Play Store	65622e81-0699-4daa-8db4-ea14cba28d2e	Difficult to deal with this application. The application is complex.	Asas O.	##########			1	ar	us		1	ar	difficult deal application application complex	Negative	1	0	0
Google Play Store	62df7ec4-df50-478a-a38d-ff592ab1b543	Very good.	محمود علام	##########			0	ar	us		5	ar	good	Positive	0	0	0
Google Play Store	2375371a-7d3e-48da-9a0b-09871b02c465	The new update is very bad... it cannot be opened... we hope for a re-release of the old version or to fix the problem.	moh alyazidi	##########			20	ar	us		1	ar	new update bad open hope rerelease old version fix problem	Negative	1	1	0
Google Play Store	3dd17ba1-2a01-4e62-bbed-6cf1487536d9	Very bad commentator, not reliable and has many problems. What surprises me is that the problem hasn't been solved despite the long time, and it's still as bad as before.	naser //	##########			1	ar	us		1	ar	bad commentator reliable many problems surprise problem hasnt solve despite long time still bad	Negative	1	1	0
Google Play Store	633422b5-9e74-4d6e-bdf4-2ee8b39ed18f	The worst application has not been working for two days after the new update, and opening the website to use the application.	رائد ابو عسكر	##########			4	ar	us		1	ar	bad application work two days new update open website use application	Negative	1	1	0
Google Play Store	05f9b15f-acf4-40b4-be37-5e2b6cea6846	"Very special service, thank you very much"	Mohmed Abdulla	##########			0	ar	us		5	ar	special service thank much	Positive	0	0	0
Google Play Store	402ce6cd-7052-43f9-aa0b-bc738cab0d8b	"I am trying to update, and it still says 'updating' or 'installing'? And does it work?"	Dr Is Sh	##########			0	ar	us		1	ar	try update still say update instal work	Neutral	0	1	0
Google Play Store	f547faf2-c620-4588-9dcd-dac8dc66f1dc	The application doesn't open.	Lau Al	##########			0	ar	us		1	ar	application doesnt open	Negative	0	1	0
Google Play Store	7fefd269-611b-4268-ba7f-21b53d6de471	It does not work.	Hossam Elshaer	##########			0	ar	us		1	ar	work	Negative	0	1	0
Google Play Store	30fc181e-309c-4ddf-81c9-ed43396307e3	The application is not working after the update. I can't even open the application, and when I tap on it, it closes immediately. I have deleted and reinstalled it twice, but the same problem persists.	طارق الشوالي	##########			107	ar	us		1	ar	application work update cant even open application tap close immediately delete reinstall twice problem persist	Negative	0	1	0
Google Play Store	76c2c327-2c9b-453a-9601-754cdcb5e412	I swear to God, the badness is beyond badness through the application, sorry, but I can't enter. I have to enter through the Play Store and then it opens, and many times I can't enter, it keeps on reading and reading and there is nothing. Should I delete the application and reinstall it without any benefit? What is the solution with Al-Ahli Bank? Until when?	Hussam H	##########			1	ar	us		1	ar	swear god badness beyond badness application sorry cant enter enter play store open many time cant enter keep read read nothing delete application reinstall without benefit solution alahli bank	Negative	1	1	0
Google Play Store	c49b167e-1d0a-4f62-9458-ccea3b928613	Very cool.	فني تكييف خالد كرو	##########			1	ar	us		1	ar	cool	Positive	0	0	0
Google Play Store	7b176e1c-dbf7-49ee-b540-3ba87333a0b0	Excellent, the Al Rajhi Bank app is a thousand times better. May God bless you. After using it for 3 years, the app has become better with updates and developments. We hope for more and more updates to improve the experience of the Al Ahli Bank app.	تخطيط RAND KSA	##########			0	ar	us		5	ar	excellent al rajhi bank app thousand time good may god bless use years app become good update developments hope update improve experience al ahli bank app	Positive	1	0	0
Google Play Store	f918c655-9138-47c4-bea1-7ed7d165a6e8	Good.	Fawzia	##########			0	ar	us		4	ar	good	Positive	0	0	0
Google Play Store	39a73302-23fb-4a9a-9f37-5a192c67c736	The application is not working after the latest update and cannot be accessed.	ابو حسام المالكي	##########			0	ar	us		1	ar	application work late update access	Negative	0	1	0
Google Play Store	4d9950dd-c6bc-49a7-8464-711c5fe78d71	"He hangs and no one responds to you."	استغفر الله العظيم	##########			0	ar	us		1	ar	hang one respond	Negative	0	0	1
Google Play Store	fe994ae8-2122-4fd4-bae7-b6b869cd1be4	The new update is very bad and it does not open.	hbh binbriuk	##########			0	ar	us		1	ar	new update bad open	Negative	1	1	0
Google Play Store	d1916537-fdbd-4be1-959e-b0b8b3719199	Unfortunately, it doesn't open for longer periods. Every time I try to access it, it says "We apologize for the inconvenience and the service is not available."	حضرموت الحضاره	##########			1	ar	us		1	ar	unfortunately doesnt open long periods every time try access say apologize inconvenience service available	Negative	0	1	0
Google Play Store	61f55889-aa69-478d-acd9-d068f6277719	It is not working after the latest update.	أبو مازن	##########			1	ar	us		1	ar	work late update	Negative	0	1	0
Google Play Store	3c755556-8a55-4b90-a634-636460c1b56d	Designer 2	محمد العزي	2023-09-05 09:29:00			0	ar	us		5	ar	designer	Neutral	0	1	0
Google Play Store	e0dbe66d-ea63-420e-b9a8-f8addd30dd8b	A distinguished bank in everything, I thank all the workers and those in charge of it, and I wish them success and prosperity.	خالد عبد العظيم	2023-09-05 09:21:00			2	ar	us		5	ar	distinguish bank everything thank workers charge wish success prosperity	Positive	1	0	0
Google Play Store	8cbe0b60-17b9-43e4-bb89-20274dcc6622	jghgj	ابو يوسف عمر	2023-09-05 08:40:00			1	ar	us		1	ar	jghgj	Neutral	0	0	0
Google Play Store	ce2d43d5-841e-4085-a00b-0f6bfcaea58e	Excellent	لومتي ناصر	2023-09-05 08:14:00			0	ar	us		5	ar	excellent	Positive	0	0	0
Google Play Store	884ce328-2047-4ce3-9f8c-59e8736897ac	Wonderful experience.	Sarah Zouzou	2023-09-05 07:45:00			0	ar	us		5	ar	wonderful experience	Positive	0	0	0
Google Play Store	3e6f149a-34d9-4b07-92ae-9e4905dd3ed5	Very good	عبدالكريم ناجي	2023-09-05 06:29:00			0	ar	us		4	ar	good	Positive	0	0	0
Google Play Store	998567cc-b962-4a21-b62f-34a9be651c14	Alhamdulillah	محمد سعيد	2023-09-05 06:11:00			0	ar	us		4	ar	alhamdulillah	Positive	1	0	0
Google Play Store	fdbc3786-2201-4df6-9e30-c22deef99c9c	After the recent update, the application is not working and an error message appears stating that it cannot connect to the server.	ابو مشاري	2023-09-05 05:59:00			7	ar	us		3	ar	recent update application work error message appear state connect server	Negative	0	1	0
Google Play Store	6b4fecb9-86d7-4fbd-a99f-969c06497cf7	"My Microsoft Office doesn't open at all, I have deleted the application and reinstalled it again, but it still doesn't work. What is the solution?"	Shaima Azhar	2023-09-05 04:21:00			1	ar	us		1	ar	microsoft office doesnt open delete application reinstall still doesnt work solution	Negative	0	1	0
Google Play Store	e1b661a3-fb0d-4554-bc15-b4a05368f489	Excellent	Mahmood Al Mahmood	2023-09-05 04:16:00			0	ar	us		5	ar	excellent	Positive	0	0	0
Google Play Store	e0b689ba-8d22-400b-935a-89c4ab6ef1d9	Very beautiful application 💎💎💎💎💎	النجم الثاقب	2023-09-05 02:05:00			0	ar	us		5	ar	beautiful application	Positive	0	0	0
Google Play Store	fead8e2f-844f-4da0-82f9-8f812a2a514f	Excellent very very and thank you.	Mohammed Aldialami	2023-09-05 00:55:00			0	ar	us		5	ar	excellent thank	Positive	0	0	0
Google Play Store	12e9910e-b9cb-4237-8ddb-4ad8454ddb32	Everything has become complicated with the new update.	Jaber Al Jaber	##########			0	ar	us		5	ar	everything become complicate new update	Negative	1	0	0
Google Play Store	838d1e13-1b84-4444-9e85-75cfec729595	The user says their account is suspended and banned, and they have about 6 months left until it is active again. They are not working with Al Ahly Mobile. Can anyone help them?	هاني مصطفى	##########			0	ar	us		5	ar	user say account suspend ban months leave active work al ahly mobile anyone help	Negative	0	0	1
Google Play Store	e12bc08b-6ec6-4a49-856b-7c670de17c90	Very good	Faisl Alfaisal	##########			0	ar	us		1	ar	good	Positive	0	0	0
Google Play Store	ca25d093-44b8-494c-9786-6c954dbcfd91	Beautiful	ياسين الحميري	##########			0	ar	us		5	ar	beautiful	Positive	0	0	0
Google Play Store	a436095e-cab2-4cfe-8e59-5c8320299b5c	Why doesn't the application open after the update?	فيصل الزهراني	##########			2	ar	us		1	ar	doesnt application open update	Neutral	0	1	0
Google Play Store	8f5dd8c8-2b24-487a-b5a4-597add0fc1a6	I cannot access the application, and a message appears to activate the GPS, even though I have already activated the GPS.	Rere G	##########			3	ar	us		1	ar	access application message appear activate gps even though already activate gps	Negative	0	1	0
Google Play Store	b2920f7d-8868-4ef7-bea4-ab25abf6ba0b	Wonderful	Ajeer Sharahily	##########			0	ar	us		5	ar	wonderful	Positive	0	0	0
Google Play Store	b4514b4c-41af-401a-8185-646eb8bcb736	Regardless of the fact that the application does not support the back or close command, after the recent update, the problem of activating the geolocation every time the application is launched has become annoying. Honestly, this is tedious because, in my opinion, the application is supposed to be for quick operations, not for delays and interruptions.	أحمد عبيد	##########			199	ar	us		1	ar	regardless fact application support back close command recent update problem activate geolocation every time application launch become annoy honestly tedious opinion application suppose quick operations delay interruptions	Negative	1	0	1
Google Play Store	a40542c9-1e90-4913-966f-b7ec45e34f9a	Al-Ahli Bank is a prestigious and great bank, and the recent update does not live up to the bank's reputation. It requires turning on GPS, and even though it is turned on, the application crashes and exits. I hope the problem can be resolved.	Ahmed Ali Abdelrazek	##########			3	ar	us		1	ar	alahli bank prestigious great bank recent update live bank reputation require turn gps even though turn application crash exit hope problem resolve	Negative	1	1	0
Google Play Store	7e021211-ebd9-4e57-a0f2-93e93864048e	Ease of use and the ability to perform many tasks with comfort and peace.	عادل الخليفة	##########			3	ar	us		4	ar	ease use ability perform many task comfort peace	Positive	0	0	0
Google Play Store	00bc6cc7-fd53-4fd2-ac5d-2cd8e33ddca2	The latest update is very bad, every time it asks for the location.	محمد العنزي	##########			1	ar	us		1	ar	late update bad every time ask location	Negative	1	0	0
Google Play Store	de923592-446c-4b54-b806-558a3b28bfdc	His mistakes are many and his comments are numerous. I hope for better improvement.	مريم	##########			0	ar	us		1	ar	mistake many comment numerous hope good improvement	Negative	1	0	0
Google Play Store	fa36603a-97fc-4af3-a8c6-297aee291c56	I am really overwhelmed with many problems and it didn't work out for me.	او الليل	##########			1	ar	us		1	ar	really overwhelm many problems didnt work	Negative	1	1	0
Google Play Store	333f9a17-737f-4655-ad97-d4995b29d318	Good	YAHYA ALMANSOR	##########			0	ar	us		5	ar	good	Positive	0	0	0
Google Play Store	3031dcf2-6f83-401d-bd6b-fda717a3ea63	With Al Ahli Mobile, there is comfort, speed, and safety.	MUJAHID OMAR	##########			0	ar	us		5	ar	al ahli mobile comfort speed safety	Positive	0	0	0
Google Play Store	b6b15048-e02c-45e2-a09c-9cdacb86d9b2	Why is it mandatory for us to give you our location, buddy? Leave us alone, you don't need to know where I am or what I'm drinking.	Hassan Jarodi	##########			1	ar	us		1	ar	mandatory us give location buddy leave us alone dont need know im drink	Negative	1	0	0
Google Play Store	22d58ae8-ba5b-410c-b0c8-451b31049d9c	The application hasn't been working for two days.	Dafallah Ahmed	##########			0	ar	us		1	ar	application hasnt work two days	Negative	0	1	0
Google Play Store	4df3863f-2b02-42d2-9991-a829c4078831	This bank lacks credibility in its dealings.	انت انت	##########			1	ar	us		1	ar	bank lack credibility dealings	Negative	1	0	0
Google Play Store	afe40fbc-7ebb-4a69-99fc-3c883d0eee5e	The application problem does not give me any notifications or reminders whenever I access it.	عمر بانعيم	##########			1	ar	us		2	ar	application problem give notifications reminders whenever access	Negative	0	1	0
Google Play Store	2e34b9c1-33f4-4612-8681-e45431b8016e	nice	فواز جيلان	##########			0	ar	us		5	ar	nice	Positive	0	0	0
Google Play Store	c130b972-5668-4685-96bb-8965b542bd85	The application has not been opening for me since yesterday on my Android device.	Mohamed Fathi	##########			1	ar	us		1	ar	application open since yesterday android device	Negative	0	1	0
Google Play Store	d778b4f4-bef5-4122-969a-196c57bf8f8e	The application does not open for me with the latest version.	القرآن الكريم	##########			1	ar	us		1	ar	application open late version	Negative	0	1	0
Google Play Store	eb61fa8d-1c0c-44e0-97c5-328fddd242df	Very good	بساس نت السوداني	##########			0	ar	us		5	ar	good	Positive	0	0	0
Google Play Store	f14e82dd-464b-4c8e-8e3c-643ead2a7607	Wonderful	عبده غالب العمري	##########			0	ar	us		5	ar	wonderful	Positive	0	0	0
Google Play Store	87ea4400-b00d-413b-a235-c90ea27c32ec	Very good	عثمان احمد	##########			0	ar	us		5	ar	good	Positive	0	0	0
Google Play Store	58b5149d-eb69-4502-aea2-670aadf5db52	Excellent	حسين نعمان	##########			0	ar	us		5	ar	excellent	Positive	0	0	0
Google Play Store	771c57a5-d0e3-4054-a779-f64b68956686	What's the deal with the latest update? It's not letting me access the application. What a disaster!	أبو ناصر الكثيري	##########			0	ar	us		1	ar	whats deal late update let access application disaster	Negative	0	1	0
Google Play Store	70fdd233-903b-4072-b0fe-7f150ef2bcec	Improvement after the update.	Mh Hsn	##########			0	ar	us		5	ar	improvement update	Positive	1	0	0
Google Play Store	d7e1b33a-2bd6-4a3b-b7f9-2441ce16acb5	Very good.	Al Muhannad ALRZAEHI	##########			0	ar	us		5	ar	good	Positive	0	0	0
Google Play Store	7d367af2-951f-4acd-b81f-bea27b6f623d	The application is the worst and now it is not opening.	Gnody N	##########			1	ar	us		1	ar	application bad open	Negative	1	1	0
Google Play Store	1d82331a-2788-45c8-947a-51173f896281	Excellent very much.	عمر عسوني	##########			0	ar	us		5	ar	excellent much	Positive	0	0	0
Google Play Store	a9c6cb2e-fe1c-4ab2-aa70-1e77bb8d2fb4	Excellent	يحي فقيهي	##########			0	ar	us		5	ar	excellent	Positive	0	0	0
Google Play Store	a5acead2-dae9-4c6e-8632-d65d1aa3ffb6	"Excellent"	فلك عبدالحليم	##########			0	ar	us		5	ar	excellent	Positive	0	0	0
Google Play Store	c183e30a-a30b-4097-b011-35b974398bd5	The first application didn't leave anything good for me. My account doesn't come out at all.	Abdullah As	##########			0	ar	us		4	ar	first application didnt leave anything good account doesnt come	Negative	0	1	0
Google Play Store	33daac7f-653a-48d3-9b4d-9800b6b33b42	Every update is worse than the one before it.	abu meshal	##########			1	ar	us		1	ar	every update bad one	Negative	1	0	0
Google Play Store	a5ec39f8-7ca1-4fc5-a9d4-a50e50914597	Excellent very much.	شرقاوي شرقاوي	##########			0	ar	us		5	ar	excellent much	Positive	0	0	0
Google Play Store	3e25a135-c048-4683-b0dc-10cb2139956f	Why is it mandatory for me to open the website every time I enter the application? The latest update is the worst.	الجيزاني علي	2023-09-04 09:54:00			2	ar	us		1	ar	mandatory open website every time enter application late update bad	Negative	1	1	0
Google Play Store	43314055-3247-4397-9c5f-40a50ee2664f	After the update, a location selection window appears to me and I am unable to enter the password due to this window.	Rafi AlAmri	2023-09-04 09:27:00			1	ar	us		1	ar	update location selection window appear unable enter password due window	Negative	0	1	0
Google Play Store	fc9d9849-6463-45bf-8a69-117a9959fc8e	It provides many conveniences regarding the branch.	الكنده العاصمي	2023-09-04 09:11:00			0	ar	us		4	ar	provide many conveniences regard branch	Positive	1	0	0
Google Play Store	d7336af3-1d78-4989-b7fe-e4312cd250cf	One of the best banking applications.	ابو احمد السهيمي	2023-09-04 09:09:00			0	ar	us		5	ar	one best bank applications	Positive	0	0	0
Google Play Store	c1b0ebf3-2ee6-45ce-b09b-8f3e575ba557	Excellent	ضيف الله اليامي	2023-09-04 08:54:00			0	ar	us		5	ar	excellent	Positive	0	0	0
Google Play Store	e7970527-3898-4dad-8880-30911be48950	Good	محمد سعيد الشميري	2023-09-04 08:39:00			0	ar	us		5	ar	good	Positive	0	0	0
Google Play Store	90f96464-9ba0-4bed-a045-1a057e0e272b	And God knows, among the worst banks and applications.	‪Eh eh (EH)‬‏	2023-09-04 08:23:00			1	ar	us		1	ar	god know among bad bank applications	Negative	1	0	0
Google Play Store	e5dd637e-734c-459f-aab5-f7f272139d4f	Beautiful and relaxing, everything is good for you when you're at home.	يارب انت قيوم السموات والارض	2023-09-04 08:12:00			0	ar	us		5	ar	beautiful relax everything good youre home	Positive	0	0	0
Google Play Store	71e42a58-d983-416e-892b-a8b6a5773658	Very good, excellent. Thank you.	ابو احمد	2023-09-04 08:11:00			0	ar	us		5	ar	good excellent thank	Positive	0	0	0
Google Play Store	57457380-bd20-4f7d-bf9f-51dc75916b5e	Wonderful	Ossama Aburas	2023-09-04 08:10:00			0	ar	us		3	ar	wonderful	Positive	0	0	0
Google Play Store	58fba54c-c934-4738-8700-749478bfa0d2	The new release "Zibalah Al-Najmah" is very trashy.	عزوز المليكي	2023-09-04 08:03:00			0	ar	us		1	ar	new release zibalah alnajmah trashy	Negative	1	0	0
Google Play Store	defc4727-195b-41e0-b623-20bab527b93e	Good.	والي محمد بخيت	2023-09-04 08:02:00			0	ar	us		5	ar	good	Positive	0	0	0
Google Play Store	f73b8d69-29b9-40e1-87a2-20a0883a91b6	Excellent evaluation	Maher Abuzaid	2023-09-04 07:39:00			0	ar	us		5	ar	excellent evaluation	Positive	0	0	0
Google Play Store	d0b19728-d44b-477d-891f-e1d8267b256e	Worse than bad.	Abdulaziz Alateeq	2023-09-04 07:06:00			1	ar	us		1	ar	bad bad	Negative	1	0	0
Google Play Store	34e2ad98-ae62-44ea-bd85-4714f50f669f	The application sometimes freezes.	عبدالله دغجان	2023-09-04 06:52:00			0	ar	us		1	ar	application sometimes freeze	Negative	1	0	1
Google Play Store	bf48fd24-01a1-4094-a59c-a8f910e27ad9	The program is excellent.	Basam Alhnity	2023-09-04 06:30:00			0	ar	us		4	ar	program excellent	Positive	0	0	0
Google Play Store	4bb1872b-d1a0-4398-a650-82af9403a8ca	Wonderful experience	رياض القربي	2023-09-04 06:23:00			0	ar	us		5	ar	wonderful experience	Positive	0	0	0
Google Play Store	6a5989fd-e625-4cc5-8d91-92c65235bc8a	Good	علي العرامي	2023-09-04 06:23:00			0	ar	us		3	ar	good	Positive	0	0	0
Google Play Store	260bf366-139a-43a1-87d4-aa300d7ed709	Excellent	FATM alrajhi	2023-09-04 06:13:00			0	ar	us		5	ar	excellent	Positive	0	0	0
Google Play Store	28a635bf-6907-48e0-b0d6-baa63616145f	Thank you.	محمد شوعي	2023-09-04 05:58:00			0	ar	us		5	ar	thank	Positive	0	0	0
Google Play Store	1e95a826-e638-4efe-8938-c00cf19c258f	Old bank and the application services are lousy. Even to access the application, a password and then fingerprint are required. Be like Al Rajhi Bank, where you can access immediately with the fingerprint. As for the mobile banking, it requires a personal number and a secret number. Currently, Al Rajhi Bank only requires a secret number for mobile banking.	محمد الحارثي	2023-09-04 05:52:00			2	ar	us		1	ar	old bank application service lousy even access application password fingerprint require like al rajhi bank access immediately fingerprint mobile bank require personal number secret number currently al rajhi bank require secret number mobile bank	Negative	1	1	0
Google Play Store	851ee293-b5fb-42df-a97f-219aca1b0c0f	Very good.	‪ABU “Daebro” MsharY4IVA‬‏	2023-09-04 05:42:00			0	ar	us		5	ar	good	Positive	0	0	0
Google Play Store	87f8b143-a19d-4139-b184-08dd8cfc3026	ADSAD	ايريتيت تبتبتب	2023-09-04 05:11:00			0	ar	us		2	ar	adsad	Neutral	1	0	0
Google Play Store	943743a5-f311-40d7-b915-d28ec89c3441	I have nothing but praise, thanks, and appreciation for this application and all the beautiful things you offer. You make the lives and work of the users easier.	Huseen20120 2016	2023-09-04 05:00:00			1	ar	us		5	ar	nothing praise thank appreciation application beautiful things offer make live work users easy	Positive	1	0	0
Google Play Store	285124e9-f5e6-483a-bb4a-9c970ee4b356	Good.	محمد سعد جربوع	2023-09-04 04:59:00			0	ar	us		5	ar	good	Positive	0	0	0
Google Play Store	7251dcb5-5f96-4df6-b5b4-ab044fa8804e	Excellent.	منصور بحري	2023-09-04 04:38:00			0	ar	us		5	ar	excellent	Positive	0	0	0
Google Play Store	9cc26ac9-23b0-40da-8548-79f8cb32f33e	Good.	عبد الرحمن القديمي القديمي	2023-09-04 03:55:00			0	ar	us		5	ar	good	Positive	0	0	0
Google Play Store	323ce691-45e5-4609-ad23-6c90b4fc8a07	Excellent, in the name of Allah, praise be to Him.	Mosab Kamal	2023-09-04 03:12:00			0	ar	us		5	ar	excellent name allah praise	Positive	0	0	0
Google Play Store	e0c278b9-ce60-4a6c-8cb5-4164fba65e91	It is bad and very bad, the website requires settings and I opened the settings and there is no permission to use the location... and now it is frozen.	عوض العمري	2023-09-04 02:56:00			58	ar	us		1	ar	bad bad website require settings open settings permission use location freeze	Negative	1	0	1
Google Play Store	bb8b0c5f-d519-4c96-bc12-44de29938b0d	Very beautiful	Soso Doja	2023-09-04 02:36:00			0	ar	us		5	ar	beautiful	Positive	0	0	0
Google Play Store	3e4cbd8b-2cd3-4ce6-bfc7-e08cc9fa5df8	A very beautiful application.	غريب الدار	2023-09-04 01:49:00			0	ar	us		4	ar	beautiful application	Positive	0	0	0
Google Play Store	66eba05e-dc0a-4246-862f-7ee610ac0871	Honestly, it is a very very very wonderful and beautiful experience.	ابو عامر القاصر	2023-09-04 01:44:00			0	ar	us		5	ar	honestly wonderful beautiful experience	Positive	0	0	0
Google Play Store	d8788b4b-a09e-42cc-9b42-a4efeac773c8	Excellent experience.	ابوهمس الزهراني	2023-09-04 01:32:00			0	ar	us		5	ar	excellent experience	Positive	0	0	0
Google Play Store	50a855fc-745b-46a7-9085-86628c3ed71c	Mumtaz	عبدالرزاق الرجب	2023-09-04 01:22:00			0	ar	us		5	ar	mumtaz	Neutral	0	0	0
Google Play Store	d8705dea-2feb-480d-8a45-935f6a6382b4	Excellent, very excellent	khalid kerfis	##########			0	ar	us		5	ar	excellent excellent	Positive	0	0	0
Google Play Store	da4edabd-b751-4c3e-857b-2100fe41c318	Very good.	سيد ربيع	##########			0	ar	us		5	ar	good	Positive	0	0	0
Google Play Store	55fe01da-d229-4f85-9efe-5e28f2e92b0e	Like shit, I swear.	ميمو	##########			0	ar	us		1	ar	like shit swear	Negative	1	0	0
Google Play Store	8522f29a-547c-484b-9067-28ca5195b530	the worst in every aspect, and it is impossible to communicate with him. And when you call him, he tells you, "I'm sorry, the number is incorrect."	ابو غلا	##########			1	ar	us		1	ar	bad every aspect impossible communicate call tell im sorry number incorrect	Negative	1	1	0
Google Play Store	6889ecf1-0107-4b79-911d-8565c1b0989c	Bad	Kh Al	##########			1	ar	us		1	ar	bad	Neutral	1	0	0
Google Play Store	f6152134-d1a3-42c0-bb6c-728e9afc1510	No problem	عبدالله	##########			0	ar	us		3	ar	problem	Neutral	0	1	0
Google Play Store	5117de75-504b-4879-8f0b-e7dab98f5449	"Bad application, and on top of its badness, it asks for location access. Why is it violating privacy?"	DHMSH	##########			2	ar	us		1	ar	bad application top badness ask location access violate privacy	Negative	1	0	0
Google Play Store	2f1aa436-315a-4dfe-8998-a2c323c76fc1	Excellent, very good.	عصام كريم المشاعر	##########			0	ar	us		5	ar	excellent good	Positive	0	0	0
Google Play Store	ef2e4c9a-82a3-4ad7-b34c-6760478c6dab	Excellent, good luck!	دخيل الله الحارثي	##########			0	ar	us		5	ar	excellent good luck	Positive	0	0	0
Google Play Store	73de7b60-4a2d-4eee-b0b1-3f9a75497996	Excellent.	Magdy Khodair	##########			0	ar	us		5	ar	excellent	Positive	0	0	0
Google Play Store	ad2db756-da70-4cc5-a371-6bb2b15e9527	Al Ahli Bank is an ancient institution that keeps up with the generations.	صيته الحازمي	##########			0	ar	us		5	ar	al ahli bank ancient institution keep generations	Positive	1	0	0
Google Play Store	e27bc037-a3ba-43ce-ac0c-00899364b6a6	By God, even a star is wasted on you.	Hadi W	##########			1	ar	us		1	ar	god even star waste	Negative	1	0	0
Google Play Store	eb704c31-777e-4fae-b855-d2aef50d449c	Excellent	تغريد الحربي	##########			0	ar	us		5	ar	excellent	Positive	0	0	0
Google Play Store	aaa8a473-a61d-448c-87e4-669c73a7d4aa	The application never opens with the new update... It's very bad.	Sting Sting Up	##########			1	ar	us		1	ar	application never open new update bad	Negative	1	1	0
Google Play Store	ce9c7895-e71c-432c-8d8a-5d2405be116d	Complex	ابو سلمان	##########			0	ar	us		3	ar	complex	Neutral	1	0	0
Google Play Store	caa23a3a-f443-48c3-bd57-207beeb94feb	The best bank.	Wagas Wad Alklel	##########			0	ar	us		5	ar	best bank	Positive	0	0	0
Google Play Store	5b8bd702-997e-41b4-b9a8-33596087af24	Excellent	ABG alghamdi	##########			0	ar	us		5	ar	excellent	Positive	0	0	0
Google Play Store	1f773cea-c0a3-4091-811b-b75565c0c778	"Even in Burkina Faso they do a better job of accounting than what I see."	Saad Al-Madi	##########			0	ar	us		1	ar	even burkina faso good job account see	Neutral	0	0	0
Google Play Store	997baa13-d113-49d7-ac5c-3deda3dd04e6	I hope it is possible to make transfers and other services from all banks.	عاشق سويده	##########			0	ar	us		5	ar	hope possible make transfer service bank	Neutral	1	0	0
Google Play Store	4ca9f1cc-f1ab-4a48-bd04-06bba5e2bb4c	The only flaw in it is that every time you open it, it wants an update. It would be great if the update was for a long period. As for the application, it is good for now. The new update is very bad, it refuses to open.	علي المطري	##########			0	ar	us		5	ar	flaw every time open want update would great update long period application good new update bad refuse open	Negative	1	1	0
Google Play Store	6458dca5-cf5b-4804-976a-4ad7844dba90	Every two days there is an update, and every update is worse than the previous one. I needed it for travel, but the update caused a stumbling block.	Slver2 Gold	##########			2	ar	us		1	ar	every two days update every update bad previous one need travel update cause stumble block	Negative	1	0	1
Google Play Store	06ae0577-3c77-4021-be08-39765392b4d8	"Good, but why is there an update every time?"	هيثم محمد	##########			0	ar	us		5	ar	good update every time	Neutral	1	0	0
Google Play Store	6f40d3c4-3c74-4ba3-905f-bd97f3073e21	Very good	Huss yara	##########			0	ar	us		5	ar	good	Positive	0	0	0
Google Play Store	5e9b69d3-4959-4416-99bd-95b8b81d0b10	The best program in the world.	علي العسيري	##########			0	ar	us		5	ar	best program world	Positive	0	0	0
Google Play Store	02e15a7b-bc6f-423c-bcf1-bed256e335e7	He refuses to enter after the update, hoping to solve the problem as quickly as possible.	ابوعبدالله 9030	##########			2	ar	us		1	ar	refuse enter update hop solve problem quickly possible	Neutral	0	1	0
Google Play Store	11cd0897-373c-4ffb-b7d0-d590a0513fdd	Excellent👍🙏	Sama T	##########			0	ar	us		5	ar	excellent	Positive	0	0	0
Google Play Store	864a86af-31fa-4909-a50b-d48114ef9e78	More than wonderful.	بلال قسم الله	##########			0	ar	us		5	ar	wonderful	Positive	0	0	0
Google Play Store	a01edb8c-3cad-4c75-ba40-3410feb44dfd	Excellent very very very	ابوميرال المالكي	##########			0	ar	us		5	ar	excellent	Positive	0	0	0
Google Play Store	28c47070-9a96-4b48-8eb9-8dded7281cf6	Excellent	Khalid Aljedaani	##########			0	ar	us		5	ar	excellent	Positive	0	0	0
Google Play Store	49922eff-b76b-4abb-8a3e-8835453a5e9c	Excellent	Sadiq Malibari	##########			0	ar	us		5	ar	excellent	Positive	0	0	0
Google Play Store	d104b68d-be12-4958-837b-a711e5ef2f73	Yes. FYI.	Mohammedsaeed Jamal	##########			0	ar	us		1	ar	yes fyi	Neutral	0	0	0
Google Play Store	1d898587-ef92-49e4-af6b-1bcfa48b9f3d	Excellent.	صافي النية	##########			0	ar	us		5	ar	excellent	Positive	0	0	0
Google Play Store	5dcdc44f-6bcf-4231-8dce-a638fa7f314f	hgh	اسامه احمد	##########			0	ar	us		5	ar	hgh	Neutral	0	0	0
Google Play Store	2dea6329-0402-46df-aab1-da3fbb250194	Weak application compared to Al Rajhi.	M Sh	##########			1	ar	us		2	ar	weak application compare al rajhi	Negative	1	0	0
Google Play Store	b29c97db-908b-4ee4-8203-fa6d94a2a9ca	Excellent	صدام صلاح	##########			0	ar	us		4	ar	excellent	Positive	0	0	0
Google Play Store	c4509467-d63b-4b92-a077-67985a5d66c2	He asked me to update, I entered the application several times, it told me to try again, but I couldn't find it. The application has become very very bad, so I deleted it to download it again, but I'm facing the same problem.	‪Ahmed Mohamed (‫غسيل سيارات با البخار‬‎)‬‏	##########			1	ar	us		1	ar	ask update enter application several time tell try couldnt find application become bad delete download im face problem	Negative	1	1	0
Google Play Store	a7b495f1-6937-48f6-aa6d-e66bb6b98d82	The application is very very slow, the new update does not open.	mon t2_	##########			0	ar	us		1	ar	application slow new update open	Negative	0	1	1
Google Play Store	32d5cbfd-7a4d-4dce-b681-d65ef117c80f	Great	Ahmad AbdaLaaL	##########			0	ar	us		5	ar	great	Positive	0	0	0
Google Play Store	b244a5f6-e671-4240-90ef-35fff4a72272	Very excellent	الهداف ابو متعب الحربي	##########			0	ar	us		5	ar	excellent	Positive	0	0	0
Google Play Store	246c59af-3d14-4418-85bc-47aefab34919	Done.	Faraj Alqahtani	##########			1	ar	us		1	ar	do	Neutral	0	1	0
Google Play Store	6e717fdf-b0d4-4e52-8164-4732394cb89a	Excellent	علي العسيري	##########			0	ar	us		4	ar	excellent	Positive	0	0	0
Google Play Store	9394dfe6-2204-4ea9-ab4c-8c9291df4b6e	Excellent	AHMED ALHZAMI	##########			0	ar	us		5	ar	excellent	Positive	0	0	0
Google Play Store	086eb3c4-5411-4ecb-9306-041e48098e5e	Excellent	محمد اليحياء	##########			0	ar	us		5	ar	excellent	Positive	0	0	0
Google Play Store	56ce28d9-492c-4a8e-98c2-baddcd7209a4	nice	Hado Sh	##########			0	ar	us		5	ar	nice	Positive	0	0	0
Google Play Store	368953db-62b1-4d29-9c76-816fea400814	The new update forces you to turn on GPS location. Bring back the old version, it's a million times better!	Hamdan AL OMARY	##########			3	ar	us		1	ar	new update force turn gps location bring back old version million time good	Positive	1	0	0
Google Play Store	63258534-e171-4218-bbe1-73bc6e5e4e16	Excellent Al Ahli... and the transaction is easy and smooth.	فضل حاج احمد الجمعابي	##########			0	ar	us		5	ar	excellent al ahli transaction easy smooth	Positive	0	0	0
Google Play Store	3bca5f3e-4f2d-498e-a98d-c1fe607e2f8a	*"Bad update."	جوري جاجا	##########			1	ar	us		1	ar	bad update	Negative	1	0	0
Google Play Store	e1019127-e7d0-493e-a3dc-2b5c97e4e3b0	Beautiful.	مبارك القحطاني	##########			0	ar	us		5	ar	beautiful	Positive	0	0	0
Google Play Store	252c0ed9-5b83-4159-b8e9-69712a2c3049	Excellent	Azmy Mohammed	##########			0	ar	us		5	ar	excellent	Positive	0	0	0
Google Play Store	df339989-6764-4817-9c93-c29240c47db4	The problem is that it keeps needing updates every now and then.	بكيل العقوري	##########			0	ar	us		2	ar	problem keep need update every	Negative	0	1	0
Google Play Store	b0e1b713-0a60-4e34-b2c2-eb6bfe039435	Review	فيصل الزهراني	##########			0	ar	us		5	ar	review	Neutral	0	1	0
Google Play Store	b3b6048a-ef5a-492d-841f-ab732e2f524b	Beautiful	DRSI I	##########			0	ar	us		5	ar	beautiful	Positive	0	0	0
Google Play Store	8e317f44-8c85-4e53-aa24-cdeaec28c72a	Thank you .. for all your services ..	bashar alsafwa	##########			0	ar	us		5	ar	thank service	Positive	0	0	0
Google Play Store	75517a73-133a-4459-ba0b-fed64ed74d15	It's not normal that every two days you come up with an update for a very boring application. There seems to be no solution to stop these updates every two days. It's really annoying. Why is this update mandatory? The constant update the worst are the worst.	motaz gawish	##########			1	ar	us		1	ar	normal every two days come update bore application seem solution stop update every two days really annoy update mandatory constant update bad bad	Negative	1	1	0
Google Play Store	2ad15533-d8c3-4923-b8bc-d788d1b22422	A bad experience every month or two, changing the application sometimes does not work out and we find it difficult, especially since I travel a lot outside the country. It would be great to stick to the application, a year ago it was the best ever.	فهد القرني	##########			0	ar	us		1	ar	bad experience every month two change application sometimes work find difficult especially since travel lot outside country would great stick application year ago best ever	Negative	1	1	0
Google Play Store	394d5cfd-cf1f-4fef-b771-a507f412d24e	The worst experience, the worst application, failed bank, location tracking, saying you want to marry someone from there.	Khalid Aldomari Khalid	##########			1	ar	us		1	ar	bad experience bad application fail bank location track say want marry someone	Negative	1	1	0
Google Play Store	da0b9d1f-c12f-41a8-95c1-a6d9f183566d	Once he is strong and once he is not strong	moh Alhebshi	##########			0	ar	us		5	ar	strong strong	Neutral	0	0	0
Google Play Store	400d0b68-07a6-4748-9044-dee2f27a3ef7	Excellent and easy application	احمد اليوبي	##########			0	ar	us		5	ar	excellent easy application	Positive	0	0	0
Google Play Store	ace12118-7f81-4158-ab48-8459c7a67ae1	The best application and	ايمان مكي٣	##########			0	ar	us		5	ar	best application	Positive	0	0	0
Google Play Store	5c53de06-eabb-4781-9c7d-bb3105895dcc	Your application is terrible, it either doesn't open or it freezes.	ranoma sa	##########			1	ar	us		1	ar	application terrible either doesnt open freeze	Negative	1	1	1
Google Play Store	20a2d5aa-d7e4-485f-9423-c94772502efa	Very good.	Hani Aljaroudi	##########			0	ar	us		1	ar	good	Positive	0	0	0
Google Play Store	6c2043d4-dfc8-4975-8fdb-5dd1b2b9a6c5	I requested to modify the password, but it only accepts up to 7 digits. What a terrible application this is!	فتى حزين	##########			1	ar	us		1	ar	request modify password accept digits terrible application	Negative	0	1	0
Google Play Store	993ad788-37d9-4a0c-9534-804216c53b1d	Beautiful application	Mohammed Mutasim	##########			0	ar	us		5	ar	beautiful application	Positive	0	0	0
Google Play Store	c13a5dff-e2fa-474d-85c9-e3bccfd89329	Excellent service and easy and wonderful application.	مذود الشمري	##########			1	ar	us		5	ar	excellent service easy wonderful application	Positive	0	0	0
Google Play Store	5173eee5-2c51-407b-834e-67cea0f506fe	I cannot access my account.	Saoosa	##########			1	ar	us		1	ar	access account	Negative	0	1	0
Google Play Store	f0954182-28d2-4fb0-8683-b8c32952cced	Very comfortable	اديب علي	##########			0	ar	us		5	ar	comfortable	Positive	0	0	0
Google Play Store	a5b077ea-817e-45a6-81c3-f0569966f084	More than excellent.	amin saggah	##########			0	ar	us		5	ar	excellent	Positive	0	0	0
Google Play Store	37ab5104-a50a-478e-928f-bd5180aeeb66	Special	Rahmah Hussein	##########			0	ar	us		5	ar	special	Neutral	0	0	0
Google Play Store	198faab0-493d-4e84-9f60-b605cf33223c	The application is bad and why does it ask for permission to access the location.	shaheen shaheen	##########			2	ar	us		1	ar	application bad ask permission access location	Negative	1	0	0
Google Play Store	f1cd2534-0a15-4f90-aa6a-11e7bc9be24c	Excellent	Ali alkamri123	##########			0	ar	us		5	ar	excellent	Positive	0	0	0
Google Play Store	96fb1289-ab86-4762-812b-2cded43d3a3c	Very excellent.	محمد حسن عبد الحكم	##########			0	ar	us		5	ar	excellent	Positive	0	0	0
Google Play Store	21356bc3-033e-4998-a4b6-e592cfb3223d	Thank you.	معاذ قاسم	##########			0	ar	us		5	ar	thank	Positive	0	0	0
Google Play Store	5fb7576a-09f0-4549-8c89-67f361ee67cd	"Not working, please review the update."	abdalsalam Mohammed	2023-09-03 06:50:00			1	ar	us		1	ar	work please review update	Negative	0	1	0
Google Play Store	8ec98d86-df61-4312-898c-c61e2f6384d0	We need to increase the services provided to leasing finance customers.	Abdulaziz Shamsuddin	2023-09-03 03:21:00			0	ar	us		4	ar	need increase service provide lease finance customers	Neutral	1	0	0
Google Play Store	b030fcd3-3c64-46ec-8d82-959f17ca60c6	It is bad, it does not work most of the time.	mohame ahmed awd	##########			0	ar	us		1	ar	bad work time	Negative	1	1	0
Google Play Store	e4f7f1cd-ad83-47b5-927b-0b840e525ad0	The bank is very bad and the program has become worse, my friend. Anyone who uses Bank Al Bilad or Al Rajhi, by God, Al Ahli Bank is bad and there is no security. My mother's account is frozen and my account has been frozen for 4 months and I cannot withdraw my money. Every time I go back to them, they say we have submitted a request. What is my fault? My account was hacked because the security i…	Loove M.huraib	##########			0	ar	us		5	ar	bank bad program become bad friend anyone use bank al bilad al rajhi god al ahli bank bad security mother account freeze account freeze months withdraw money every time go back say submit request fault account hack security bad give money close account may god hold accountable	Negative	1	1	0
Google Play Store	9c035d10-9647-4aff-9104-b56bac573e14	Sometimes, not receiving a message causes embarrassment by delaying appointments.	Nezar.3 Abu Nezar	##########			0	ar	us		5	ar	sometimes receive message cause embarrassment delay appointments	Negative	1	0	1
Google Play Store	e939f2c8-91d4-49dd-9126-5ac96695d828	Excellent very very	محمد حمود	##########			0	ar	us		5	ar	excellent	Positive	0	0	0
Google Play Store	a0094f8b-cde7-4e19-a5a2-e2c5cba77049	The application is not working for me.	tara to	##########			0	ar	us		1	ar	application work	Negative	0	1	0
Google Play Store	3e92d5c1-c6f3-4674-a02d-ad146d4ec5f5	The application does not open.	Abu Aseel Al-Obeidi	##########			0	ar	us		1	ar	application open	Neutral	0	1	0
Google Play Store	d40236c4-1cd0-4bfb-a073-abdec14185a2	The application does not accept submitting complaints and an error message appears. This is not the first time, but it has been happening for a long time. We use free contact and branches to overcome the problem.	BIn uomar	2023-09-02 08:11:00			2	ar	us		1	ar	application accept submit complaints error message appear first time happen long time use free contact branch overcome problem	Negative	0	1	0
Google Play Store	e42a3541-4059-4828-8e82-2ff7bebad75b	Honestly, the best application	abo bakr	2023-09-02 04:06:00			0	ar	us		5	ar	honestly best application	Positive	0	0	0
Google Play Store	9a612b41-2e30-40bb-875f-3a6a9200f389	"An easy and excellent application."	علي مدري	2023-09-02 02:24:00			0	ar	us		5	ar	easy excellent application	Positive	0	0	0
Google Play Store	7add5a61-71f4-4a94-865d-e46f84148259	Thank you.	هيفاء البلوشي	2023-09-02 01:19:00			0	ar	us		5	ar	thank	Positive	0	0	0
Google Play Store	b806f396-b01c-4b44-900d-e3171d1a49fe	Thankfulness and appreciation	نبيل الوصابي	##########			0	ar	us		5	ar	thankfulness appreciation	Positive	0	0	0
Google Play Store	6ebae64f-7341-4549-a9c3-e07d7467f54d	The hanging (thing/object) that doesn't want to open.	Ramzi Al-ebbi	2023-09-01 07:17:00			0	ar	us		1	ar	hang thingobject doesnt want open	Negative	0	1	1
Google Play Store	64e8bf4a-fb23-4457-acf1-2968d62a7462	Why doesn't the app open when I enter the Play Store, even though I have it installed?	Ibrahim Hamza	##########			0	ar	us		5	ar	doesnt app open enter play store even though instal	Neutral	0	1	0
Google Play Store	1ee9549c-8fd0-4fe3-b287-773a4cb2e4df	Very good.	Peter٢٠١٧ Ma	##########			0	ar	us		5	ar	good	Positive	0	0	0
Google Play Store	e6080eda-23b7-43b0-8d0f-d2f4859cf657	Slow and the transfer procedures are usually not completed on the first attempt.	Mohamed Hassan	##########			0	ar	us		1	ar	slow transfer procedures usually complete first attempt	Negative	0	0	1
Google Play Store	ae84a634-9640-40fc-9d0e-2cafabd32c08	Good	Montasir Mohamed	##########			0	ar	us		5	ar	good	Positive	0	0	0
Google Play Store	217fddcb-b13c-472a-8106-d6fc33a1cb28	Wonderful	Assd Asad	##########			0	ar	us		3	ar	wonderful	Positive	0	0	0
Google Play Store	e7718c9d-346c-4c0a-8181-6d8cc0521262	The app is garbage, it doesn't deliver the code to me and when it does, it closes. I opened a new account and when I contacted them, they treated me poorly. They deserve a lot of criticism. 😡😡	فاطمه الحربي	##########			0	ar	us		1	ar	app garbage doesnt deliver code close open new account contact treat poorly deserve lot criticism	Negative	1	1	0
Google Play Store	9302a923-057e-499d-8a96-838c78d5893c	Very nice	امير الشريحي	##########			0	ar	us		1	ar	nice	Positive	0	0	0
Google Play Store	d8032439-db81-4302-8b69-45a7b8906de5	Hello, the program is not working. Every time I open it, it freezes on the word "Al-Ahli". I have uninstalled it and reinstalled it, but the same problem persists.	alaa ayoub	##########			0	ar	us		1	ar	hello program work every time open freeze word alahli uninstalled reinstall problem persist	Negative	0	1	1
Google Play Store	48211e37-06c7-4c5c-8fa4-0778af52adb8	Good	M MAJED	##########			0	ar	us		5	ar	good	Positive	0	0	0
Google Play Store	507028fb-bc26-4fef-b2cc-9b4b628906f8	Unfortunately, the program has become terrible when I log into my account, it keeps showing "you have been banned" 😭	مستوره الزهراني	##########			0	ar	us		1	ar	unfortunately program become terrible log account keep show ban	Negative	1	1	0
Google Play Store	29909cdb-66dc-4e26-b725-adabe892addc	7 Aaaaaa mimhgkhall 5zgh.a.	صلاح الهنداوي	##########			0	ar	us		3	ar	aaaaaa mimhgkhall zgha	Neutral	1	0	0
Google Play Store	0ed74b4b-6254-4104-9986-7199258b4d9d	Terrible to the highest degree	Shuog Abdallah	##########			0	ar	us		1	ar	terrible high degree	Negative	1	0	0
Google Play Store	382e26df-2f9f-4b49-befd-c4d8f0a8be3d	Beautiful	عبدالله نشري نشري	##########			0	ar	us		5	ar	beautiful	Positive	0	0	0
Google Play Store	5ffff059-693f-46cc-b065-49290f8680c1	The application cannot be opened.	Nab Fou	##########			0	ar	us		1	ar	application open	Negative	0	1	0
Google Play Store	685f5817-93ad-42bd-8b78-be233ee29098	Excellent!	Mohammed Husain	##########			0	ar	us		5	ar	excellent	Positive	0	0	0
Google Play Store	7683b3dc-7342-4df1-b334-c3615a93e4ec	Fast	عبد الباقي بقه	##########			0	ar	us		5	ar	fast	Neutral	0	0	0
Google Play Store	3718718b-a8c8-4f75-b519-b793ac45ed4d	The best bank	ابو خالد المتعب	##########			0	ar	us		5	ar	best bank	Positive	0	0	0
Google Play Store	71470721-64be-430d-b0ae-e3f3c5bd96b8	An application that relieves stress. We are forced to use it.	ابو زياد	##########			0	ar	us		1	ar	application relieve stress force use	Neutral	1	0	0
Google Play Store	9997e13a-3e84-455a-82d0-d88536144d3a	The program is not working.	مستخدم Google	##########			0	ar	us		1	ar	program work	Negative	0	1	0
Google Play Store	9f2b4ad3-dec5-4f49-893e-daf148089e74	Very crazy	F A	##########			0	ar	us		1	ar	crazy	Neutral	1	0	0
Google Play Store	8c93ce53-a4cb-4c11-8a31-2d57296050fd	The application has been with me for 3 days and I want to convert it, but it says "We apologize for the unavailability of the service!"	محمد الشبر	##########			0	ar	us		3	ar	application days want convert say apologize unavailability service	Negative	0	1	0
Google Play Store	1e96218b-454f-4293-bc73-0d3a1e0cacd7	nice	سبحانك ربي	##########			0	ar	us		5	ar	nice	Positive	0	0	0
Google Play Store	d6c39ab3-10a0-4a97-b9b4-31b6d902a0ed	The worst bank, every employee transfers me to another. I made an instant transfer from Al Ahli Bank to Al Rajhi Bank and it hasn't arrived yet. I called them and they said it will reach you tomorrow.	قمورة الحلوة	##########			0	ar	us		1	ar	bad bank every employee transfer another make instant transfer al ahli bank al rajhi bank hasnt arrive yet call say reach tomorrow	Negative	1	1	0
Google Play Store	163ab92c-38b4-492e-aecb-34dfb3e7e5c7	The application does not work.	مهند الشيخ	##########			0	ar	us		1	ar	application work	Negative	0	1	0
Google Play Store	e4edbfeb-075b-481a-9eec-4a2fc5727a90	The worst Saudi banking applications are unquestionably and strongly deserving of criticism as many complaints have been made about them.	RAYAN ABDULLAH	##########			0	ar	us		1	ar	bad saudi bank applications unquestionably strongly deserve criticism many complaints make	Negative	1	0	0
Google Play Store	3a9dc09c-4cc5-461d-bc17-3e2925056fff	Bad and the service is bad.	ATALLAH ATALLAH	##########			0	ar	us		1	ar	bad service bad	Negative	1	0	0
Google Play Store	9b4c8850-d450-4c3b-8360-c6a32b103658	May Allah guide them.	aslasr 010	##########			0	ar	us		1	ar	may allah guide	Positive	1	0	0
Google Play Store	e4fa2a83-3b46-4677-bb09-d27543155e04	The first time in my life I am requesting an application that opens frozen without any error message or a reason for the lagging problem.	محمد حمد	##########			0	ar	us		1	ar	first time life request application open freeze without error message reason lag problem	Neutral	0	1	1
Google Play Store	fd4ec2de-1b33-4007-ab69-65af4db4b341	The service is bad, the salary is late and when it is released, the program crashes due to the lack of available services every month. Why is Al Rajhi Bank better than you with its direct individual service? When will your system improve? How long?	عبدالعزيز حمد	##########			0	ar	us		1	ar	service bad salary late release program crash due lack available service every month al rajhi bank good direct individual service system improve long	Negative	1	1	0
Google Play Store	6accf4ab-baa1-46c9-830f-a072326262bf	The same as the previous statement.	خلودي الرويلي	##########			0	ar	us		1	ar	previous statement	Neutral	1	1	0
Google Play Store	9b2ad67d-c3af-4400-bd06-869768ff9f12	Beautiful	حسني عوض	##########			0	ar	us		5	ar	beautiful	Positive	0	0	0
Google Play Store	3e02c7bb-1659-4fec-9034-d036dfa4f880	He hangs until the web side.	Maged Idris	##########			0	ar	us		1	ar	hang web side	Neutral	1	0	1
Google Play Store	8a90a4b6-cf7b-4081-bfeb-d3de54f8b121	Good	Mohammed Elsheikh	##########			0	ar	us		5	ar	good	Positive	0	0	0
Google Play Store	13c43091-d3c3-44be-bf17-8a419e10e0c1	"I have a comment that the app does not open after the recent update. I don't know if the problem is from you or from Huawei."	Ali Ali	##########			0	ar	us		1	ar	comment app open recent update dont know problem huawei	Negative	0	1	0
Google Play Store	76538ee6-f3f1-4d26-8326-9b33538a0bf0	I regretted the day I joined Al-Ahli. For how many days I have been trying to reach them, but no one responds. the worstlication, they handed it to Al Rajhi Bank.	ابو محمد العبدالسلام	##########			0	ar	us		1	ar	regret day join alahli many days try reach one respond worstlication hand al rajhi bank	Negative	1	0	0
Google Play Store	a9b0906a-49a2-4f9c-ad04-d24325120de7	The application does not work and freezes more than once. I delete it and reinstall it, but the same problem occurs after it freezes: a black screen appears with a message saying it is not connected to the server.	الاحمد ام حسن	##########			0	ar	us		1	ar	application work freeze delete reinstall problem occur freeze black screen appear message say connect server	Negative	0	0	1
Google Play Store	ad51eb02-d768-4153-9cf9-4ebe61b538a6	Bad application and doesn't work.	زايد عسيري	##########			0	ar	us		1	ar	bad application doesnt work	Negative	1	1	0
Google Play Store	a57594cc-4529-404b-9d3b-2c1d04ea49cb	I am a Syrian citizen residing in Syria, can I open an account at Al Ahli Bank while I am inside Syria?	جبل الشماتي	##########			0	ar	us		2	ar	syrian citizen reside syria open account al ahli bank inside syria	Neutral	0	1	0
Google Play Store	fd4fd3de-b911-44aa-bfdb-66b32b7a8eec	The application is still hanging even after being deleted and reinstalled multiple times.	غيداء مال	##########			1	ar	us		3	ar	application still hang even delete reinstall multiple time	Negative	0	1	1
Google Play Store	1687e50e-68ee-4cde-93fc-cfaf4f0e0747	"The Ahli application is the worst of applications. It fails you when you need it."	naif almospahi	##########			0	ar	us		1	ar	ahli application bad applications fail need	Negative	1	1	0
Google Play Store	a3f39213-484e-4536-a24b-71fddca19f49	It became very difficult.	ليلى ابراهيم	##########			0	ar	us		1	ar	become difficult	Negative	1	0	0
Google Play Store	4e55707c-0fed-4278-8e89-33de7962d89b	jgjg	Rdwanali	##########			0	ar	us		1	ar	jgjg	Neutral	0	0	0
Google Play Store	a4ab6041-564b-43df-9483-5a58286f9ca0	After the update, the application does not open for me.	محمد الحربي	##########			0	ar	us		1	ar	update application open	Negative	0	1	0
Google Play Store	94199af3-e1b8-4a7d-a018-12504f65dcb6	Not responsive at the required speed and delay in the system.	إبراهيم محمد	##########			0	ar	us		3	ar	responsive require speed delay system	Negative	1	0	1
Google Play Store	58c3c5b7-276c-49cd-81cc-e63a5069036f	The application is very bad. I can't access it and it refuses to accept the @ symbol.	Bdoor MOUSA	##########			0	ar	us		1	ar	application bad cant access refuse accept symbol	Negative	1	1	0
Google Play Store	1bd50d99-04dc-4140-a919-c8890868fc58	The app is stuck and won't open.	امبراطور الصعيد	##########			0	ar	us		1	ar	app stick wont open	Negative	0	1	1
Google Play Store	6ee2f060-781e-440d-89e5-33c73e7959fe	The application is not opening for me after the update. I deleted it and downloaded it again, but it still didn't open.	راكان الجروح	##########			1	ar	us		1	ar	application open update delete download still didnt open	Negative	0	1	0
Google Play Store	8f34329b-36e0-4809-b8bd-26bd45525f31	The application is very bad after the latest update. It takes a long time to log in, and in the end, it does not log in.	عبدالعظيم علي	##########			9	ar	us		1	ar	application bad late update take long time log end log	Negative	1	0	1
Google Play Store	bcb9d00b-1b0d-406f-b6ab-57591ad771fe	He constantly hangs out.	Aziz Alfrhan	##########			0	ar	us		2	ar	constantly hang	Neutral	0	0	1
Google Play Store	fd9e0ae1-c89b-4d13-9809-4df72c39a095	The best bank, Mashallah.	ياسر محمد	##########			0	ar	us		5	ar	best bank mashallah	Positive	0	0	0
Google Play Store	898d059a-719c-4cc8-a2f1-cf836c009d53	Excellent services	Saad Alharbi	##########			0	ar	us		5	ar	excellent service	Positive	0	0	0
Google Play Store	f96b947f-ba9b-42b8-a0d0-1ee436c16ded	Many comments after ten attempts he enters.	Mutaeb	##########			0	ar	us		1	ar	many comment ten attempt enter	Neutral	0	1	0
Google Play Store	9af879af-3b3f-4c7b-8924-db1914b6b7b8	The application is bad after the update. I couldn't log in to my account and I deleted it more than once, but the same problem persists.	عبدالله السهيمي	##########			1	ar	us		1	ar	application bad update couldnt log account delete problem persist	Negative	1	1	0
Google Play Store	13a3fd82-cd86-4fbe-9bd8-10bfda186e55	Very, very bad	muhand almahri	##########			1	ar	us		1	ar	bad	Negative	1	0	0
Google Play Store	b91fa660-5ab9-4423-af2b-67b59dd07c7e	Bad, it doesn't work.	Khaled al otaibi	##########			0	ar	us		1	ar	bad doesnt work	Negative	1	1	0
Google Play Store	9913fc69-a9a6-466a-a8cc-91350c4af1fb	I noticed that I can't close the application after I'm done with it. The back key doesn't respond to it, and there is no option for that!	نجم الشرق	##########			109	ar	us		3	ar	notice cant close application im do back key doesnt respond option	Negative	0	1	0
Google Play Store	204969c7-9735-4b95-92d0-804149bbf0f3	Al Rajhi Bank rejects adding a beneficiary from Al Rajhi Bank!!! Why??? Fix your useless application, you're wasting our time. May God not forgive you.	siii	##########			0	ar	us		1	ar	al rajhi bank reject add beneficiary al rajhi bank fix useless application youre waste time may god forgive	Negative	1	0	0
Google Play Store	1b368ad7-3738-4f4b-95d1-e57d6a48f99d	I will see a solution to the bank's biggest offer, an application as well.	Kbsa 96	##########			0	ar	us		1	ar	see solution bank big offer application well	Positive	1	0	0
Google Play Store	185ef66f-3e55-4bad-af9c-bc8affd2f910	My experience with Al-Ahli is incomparable.	واصل المسلمي	##########			0	ar	us		5	ar	experience alahli incomparable	Neutral	0	0	0
Google Play Store	65114197-f70d-4140-936e-8d2f6552613b	Outstanding	ياسين و يونس	##########			0	ar	us		5	ar	outstanding	Positive	0	0	0
Google Play Store	c0a3b60c-1790-4a4d-b0c9-b75bc0c0db90	It doesn't work.. it gives an error that there is no connection between the server and the application.	مشاري خاطر	##########			0	ar	us		1	ar	doesnt work give error connection server application	Negative	0	1	0
Google Play Store	d3074b36-4ea1-40d4-bf47-d648e25a5218	After the latest update, the application stopped working and an error message appears saying that it cannot connect to the server. This forced us to delete the application and download it again.	Fahad Ali	##########			437	ar	us		1	ar	late update application stop work error message appear say connect server force us delete application download	Negative	0	1	0
Google Play Store	f81bca05-4ec9-4725-ba9f-b787f2120b2c	It has not been working for a month.	Ahmed G	##########			0	ar	us		1	ar	work month	Negative	0	1	0
Google Play Store	d27a0756-4a46-45cc-98a4-9acbeba82735	It doesn't work.	زيد عبد الوهاب	##########			0	ar	us		5	ar	doesnt work	Negative	0	1	0
Google Play Store	59f9f804-4cac-4aff-bf0c-6c78c2ceb32a	Very excellent/awesome.	From 1	##########			0	ar	us		5	ar	excellentawesome	Positive	0	0	0
Google Play Store	c6c177f7-2661-4f41-971e-0b47d4a4ccb8	It does not work with the latest update. Please fix the application issue. You are a bank, not just a game.	نبض خالد	##########			0	ar	us		1	ar	work late update please fix application issue bank game	Negative	0	1	0
Google Play Store	dbeb6d9d-ff5a-4076-a607-d7996054c031	khjh	ايمن الهبوب الهبوب	##########			0	ar	us		1	ar	khjh	Neutral	0	0	0
Google Play Store	b9f9a552-da4f-4062-8df1-990a6d906816	Wonderful, I perform all my services through it, it is easy to use and continuously developing. May Allah bless you all.	SYBG O	##########			1	ar	us		5	ar	wonderful perform service easy use continuously develop may allah bless	Positive	0	0	0
Google Play Store	3099a041-5056-422f-8e5d-82b8cbcd2358	The application is very bad, it doesn't open at all on my mobile, and I can't access my account.	فتوح الشاذلي	##########			0	ar	us		5	ar	application bad doesnt open mobile cant access account	Negative	1	1	0
Google Play Store	46d61fc0-977e-4e20-b8e4-c3442203af95	It's bad if there is an error in sending the money.	محمد طنطاوي	##########			0	ar	us		1	ar	bad error send money	Negative	1	1	0
Google Play Store	004b9c25-205d-4dc0-95f3-61379666b7ab	It does not open.	ali Hamad	##########			0	ar	us		1	ar	open	Neutral	0	1	0
Google Play Store	b0403687-23ca-4df4-b610-57e7d8e61d79	Excellent very much	abukhalil al shehri	##########			0	ar	us		5	ar	excellent much	Positive	0	0	0
Google Play Store	bea0b30a-be77-416b-b8cb-930e80900c68	It doesn't open on my mobile and asks me to install it on another mobile.	soso asal	##########			0	ar	us		1	ar	doesnt open mobile ask install another mobile	Negative	0	1	0
Google Play Store	8cf8a3e1-27cb-42b4-bc37-9dd208fb0b53	The application is excellent, but it hasn't been opening for a month. I hope the administrators can solve the problem.	Amnah Matter	##########			0	ar	us		1	ar	application excellent hasnt open month hope administrators solve problem	Negative	0	1	0
Google Play Store	7cb09d2d-49f8-4100-b699-36e8b2c0eaad	Very beautiful	القاري عزت احمد	##########			0	ar	us		4	ar	beautiful	Positive	0	0	0
Google Play Store	38c5f0f2-b8c2-43a7-8e6a-681d2094f5a2	Excellent	امونه	##########			0	ar	us		5	ar	excellent	Positive	0	0	0
Google Play Store	68b65f1e-bf8d-4c93-9d91-1990520af8a5	Unfortunately, the application has become laggy and does not work on my Huawei P20 Pro. I have contacted Huawei technical support, and we have found the problem through the application. I kindly request an immediate solution to this problem.	حماده الحربي	##########			4	ar	us		1	ar	unfortunately application become laggy work huawei p pro contact huawei technical support find problem application kindly request immediate solution problem	Negative	0	1	1
Google Play Store	d39c6090-577d-4924-89ba-6d3ccae306a8	Very wonderful and comfortable.	manae m.m	##########			0	ar	us		5	ar	wonderful comfortable	Positive	0	0	0
Google Play Store	0a7f0959-9fb5-4910-9b2a-cbb011853208	The application is very bad, it is frozen now.	Sami AL	##########			0	ar	us		1	ar	application bad freeze	Negative	1	0	1
Google Play Store	b5f17f74-380c-4654-9d19-4d0dc29b6b3b	The application does not have services for purchasing recharge cards or electronics, like the Al-Rajhi application. As for other services, it is the best. I hope you add the missing services.	نادر المريسي	##########			1	ar	us		5	ar	application service purchase recharge card electronics like alrajhi application service best hope add miss service	Negative	0	1	0
Google Play Store	f983bbca-d791-4e9e-9b86-29e7ac86eb19	Excellent very much	حمدي هائل الشرعبي	##########			0	ar	us		5	ar	excellent much	Positive	0	0	0
Google Play Store	d2b4b4f9-05c5-4662-8062-02327e3e156d	Successful experience	عبدالغني الزهراني	##########			0	ar	us		1	ar	successful experience	Positive	0	0	0
Google Play Store	4b91867e-3437-4533-a205-284c98c37bf7	The application is very very very bad, I cannot access it. I have deleted it several times and it keeps failing. Please fix the application.	عماد غالب	##########			0	ar	us		1	ar	application bad access delete several time keep fail please fix application	Negative	1	1	0
Google Play Store	4531a576-4ea6-42e1-ba5c-16a8692297e7	A seamless and convenient application with easy-to-use services for customers.	Fابو سامي D	##########			0	ar	us		5	ar	seamless convenient application easytouse service customers	Positive	0	0	0
Google Play Store	f150c83f-9a3f-4aff-a522-1f72dd0e6397	Very bad, I am stuck and I can't work anymore.	alaa Kejjo	##########			0	ar	us		1	ar	bad stick cant work anymore	Negative	1	1	1
Google Play Store	832a5ece-b22b-4aed-a851-2f0b6a18c786	Very good	علي كرشمى	##########			0	ar	us		5	ar	good	Positive	0	0	0
Google Play Store	39f2a715-e6cb-46b3-b57d-04b1fc3821cb	It is not working now.	Bandar Alrasheedi	##########			0	ar	us		3	ar	work	Negative	0	1	0
Google Play Store	5462b0b8-adb4-4293-8924-3ae1c32e46f0	He doesn't work, he is a very very big the worst.	حبيب المجنحي	##########			0	ar	us		1	ar	doesnt work big bad	Negative	1	1	0
Google Play Store	4b23f1b7-92ae-4766-b1c0-9391006643f0	Very bad	ابو باسل السلمي	##########			0	ar	us		1	ar	bad	Negative	1	0	0
Google Play Store	ce0519a4-5a40-47b9-bede-fbe977049d7c	The program is really good, to be honest, but my account got frozen and I wanted to update my information, but I couldn't. I honestly don't know what the reason is.	سبحان الله	##########			0	ar	us		2	ar	program really good honest account get freeze want update information couldnt honestly dont know reason	Negative	0	1	1
Google Play Store	c9b2a838-f760-4dee-bd1a-ca0106369564	The update should be for facilitation, not complication.	Salem Alsanea	##########			0	ar	us		1	ar	update facilitation complication	Neutral	0	1	0
Google Play Store	b130da69-930b-4bcf-9fd3-6c9f6c703eac	"He hangs, especially in locksmithing."	سالم المصعبي	##########			0	ar	us		1	ar	hang especially locksmithing	Neutral	0	0	1
Google Play Store	1378828a-24a0-4fc3-9b9c-224b028df699	Unfortunately, it has become a rival to Al Rajhi Bank in terms of poor customer service. They only operate on Fridays and Saturdays, and there is no deposit available. You have a sick person and you have circumstances, but they don't care about you.	لاتعليق	##########			0	ar	us		1	ar	unfortunately become rival al rajhi bank term poor customer service operate fridays saturdays deposit available sick person circumstances dont care	Negative	1	1	0
Google Play Store	36acf090-ff0a-4785-a49d-24546626f2f7	Excellent, Allah willing.	ذي يزن الفتيح	##########			0	ar	us		5	ar	excellent allah will	Positive	0	0	0
Google Play Store	c3e72627-10a8-4779-bcf1-0016f69abe00	The application is constantly having issues. Hahaha, there hasn't been a single day when it has been working properly.	ابو حنان	##########			0	ar	us		1	ar	application constantly issue hahaha hasnt single day work properly	Negative	0	1	0
Google Play Store	4f55c522-62ab-46ff-8048-8eadada7cec0	Since yesterday, he has been refusing to talk to me.	al nasi	##########			0	ar	us		1	ar	since yesterday refuse talk	Negative	0	1	0
Google Play Store	cdd1f0b5-e353-4242-835a-b6168226022e	Excellent	مازن العشيب	##########			0	ar	us		5	ar	excellent	Positive	0	0	0
Google Play Store	c1940c46-888d-494b-a234-1ee6f30d3b2b	I cannot open the application. An error message appears (in English). Please fix the application!	هشام فهد	##########			0	ar	us		1	ar	open application error message appear english please fix application	Negative	0	1	0
Google Play Store	a1fd082d-709a-4885-a315-2a18c8025493	Excellent	خالد محمد جعلي	##########			0	ar	us		5	ar	excellent	Positive	0	0	0
Google Play Store	e9fde070-bd86-4a59-9e95-782c22b2b3ce	the worstlication and the worst bank, you have frustrated us with your application that doesn't open. Find a solution for yourselves or we will change banks.	Ana Ana	##########			0	ar	us		1	ar	worstlication bad bank frustrate us application doesnt open find solution change bank	Negative	1	0	0
Google Play Store	2feadb6f-88da-4ff3-9e4f-e276b9510fab	Please improve the transactions.	فاديه الكحيلاني	##########			0	ar	us		1	ar	please improve transactions	Neutral	0	0	0
Google Play Store	adac86ca-b432-49fc-bd5e-99eb108a53b1	Very bad, and I want to transfer my salary to another bank due to the poor services of Al-Ahli Bank.. Unfortunately, the banking sector is supposed to progress with technological advancements, but Al-Ahli Bank is regressing. 👎	ali aallii	##########			0	ar	us		1	ar	bad want transfer salary another bank due poor service alahli bank unfortunately bank sector suppose progress technological advancements alahli bank regress	Negative	1	0	0
Google Play Store	cb6b7d3d-0592-45f4-a932-321378c4da06	The program with the latest updates is bad. Every now and then, it asks me to update even though I have updated it to the latest version. The update is bad and the application only opens through the Play Store. I don't know why.	كريم العامر	##########			0	ar	us		2	ar	program late update bad every ask update even though update late version update bad application open play store dont know	Negative	1	1	0
Google Play Store	3e3ea074-30e4-4da2-90d2-cc641a87b25a	the app is down	Abdulrahman Hizam	##########			0	ar	us		1	ar	app	Negative	0	1	0
Google Play Store	0885d09b-229a-4dd8-bdb6-c926243ed973	The application does not work most of the time.	معاويه محمد	##########			0	ar	us		1	ar	application work time	Negative	0	1	0
Google Play Store	fe54cfe4-8826-4ea7-a8f3-cc0d45415545	The Ahly team has improved, thanks be to God.	رحمة جابر	##########			0	ar	us		3	ar	ahly team improve thank god	Positive	0	0	0
Google Play Store	458c2a72-76e9-4e52-8673-c2328937794e	Every period, he comments "There is no strength or power except in Allah."	Sa G	##########			0	ar	us		1	ar	every period comment strength power except allah	Neutral	1	0	0
Google Play Store	2ba1cacd-ff09-41c4-92ef-b83e777c7006	The latest update of the program is not opening, unfortunately.	Shhdud883 Shhd77	##########			0	ar	us		1	ar	late update program open unfortunately	Negative	0	1	0
Google Play Store	e698be1f-06ad-429d-8f8f-9b839fcae58e	The application is very bad and does not comply with the vision of Vision 2030. I hope that the application will be improved, its performance will be accelerated, and that it will become an example like Al Rajhi Bank's application.	دحومي HB	##########			0	ar	us		1	ar	application bad comply vision vision hope application improve performance accelerate become example like al rajhi bank application	Negative	1	0	0
Google Play Store	ffdcd310-8ec0-4fe5-a71c-761ab9a59417	Very excellent.	السيد حمدان ابو السعود	##########			0	ar	us		5	ar	excellent	Positive	0	0	0
Google Play Store	7c558612-d58a-44ea-9f2d-c58792808bdf	Garbage	Samer alsharef	##########			0	ar	us		1	ar	garbage	Negative	1	0	0
Google Play Store	b85644ef-79db-4261-b8ba-bab0fe4bff33	The application is very very bad.	ابو نوره القحطاني	##########			0	ar	us		1	ar	application bad	Negative	1	0	0
Google Play Store	ddabb88f-0cd3-4036-9627-59cb503e5ea5	Al Ahli Bank's applications are generally bad compared to Al Rajhi's.	ابوعثمان عثمان	##########			0	ar	us		1	ar	al ahli bank applications generally bad compare al rajhis	Negative	1	0	0
Google Play Store	47a902ca-3233-4e56-99db-7924eb242c21	Beautiful	نعمه الصهلولي	##########			0	ar	us		5	ar	beautiful	Positive	0	0	0
Google Play Store	dd515c82-6d9f-4700-9750-766d891bbb45	The application does not accept updating the national address. An error message always appears and I cannot make international transfers without updating the national address.	mohamed maher	##########			5	ar	us		1	ar	application accept update national address error message always appear make international transfer without update national address	Negative	0	1	0
Google Play Store	40038c3d-4a80-4db1-84f6-c5d0dd4b785b	It hangs/suspends.	تركي حمادي	##########			0	ar	us		5	ar	hangssuspends	Neutral	0	0	1
Google Play Store	5bfaf6b6-ce14-48e7-ab17-c5e466234707	Very bad, it doesn't open and it freezes.	Marwan Hezam	##########			0	ar	us		1	ar	bad doesnt open freeze	Negative	1	1	1
Google Play Store	b8e10582-9c43-4032-97d4-3f5cd87c1a68	Unfortunately, very bad.	Salem Alhamed	##########			0	ar	us		1	ar	unfortunately bad	Negative	1	0	0
Google Play Store	138cf1b3-34d7-433c-8e8d-01f609929e1a	I'm sorry. I'm not willing to enter the wrong password.	بيلي ايليش_ BiIIiE EiIish	##########			0	ar	us		5	ar	im sorry im will enter wrong password	Negative	0	1	0
Google Play Store	3005d4dd-4bcc-477e-953a-8242ff86961e	The program has been suspended since yesterday.	خالد شراحيلي	##########			0	ar	us		1	ar	program suspend since yesterday	Negative	0	0	1
Google Play Store	7061c505-d218-410a-8655-78d8a63fb254	After their latest update, I started transferring my full salary to another bank and using their application.	ABOOD	##########			3	ar	us		1	ar	late update start transfer full salary another bank use application	Neutral	0	1	0
Google Play Store	eb3a39ac-5b58-4690-b4fa-4def4391abb3	The application has not been working for several days and it is very bad. Please find a quick solution as we are tired of this and we will go to another bank.	خالد الحربي	##########			0	ar	us		1	ar	application work several days bad please find quick solution tire go another bank	Negative	1	1	0
Google Play Store	3a2f5d89-5d45-4234-b0f8-ec6d4ba997d7	The application is currently not working, I don't know what the problem is.	Magdy Elsaied	##########			0	ar	us		1	ar	application currently work dont know problem	Negative	0	1	0
Google Play Store	25a45fac-8c3a-449c-9c72-b2b3ea4f14e9	Good	ح س ن ع م ر	##########			0	ar	us		5	ar	good	Positive	0	0	0
Google Play Store	e10f6ffe-3367-492b-a35f-b368fe9fadf1	Delay in receiving financial transfers, please fix the system's malfunction.	غريب واحد	##########			0	ar	us		2	ar	delay receive financial transfer please fix systems malfunction	Negative	0	0	1
Google Play Store	4c8aa82b-7095-4bc2-a03f-d8fb36598112	Bad	علي جريبي	##########			0	ar	us		5	ar	bad	Neutral	1	0	0
Google Play Store	3f8bb077-673c-4330-8825-40aacee71c4d	This application is bad, it has been not working for more than 15 days and the updates are even worse. 👎🏻👎🏻👎🏻👎🏻👎🏻👎🏻👎🏻	Mahmoud Hamdy	##########			0	ar	us		1	ar	application bad work days update even bad	Negative	1	1	0
Google Play Store	c9f17263-70de-43cd-b209-9298fdc80025	"Like shit, may Allah honor you. No, by Allah, shit is cleaner than the application."	3bode Alhrbi	##########			0	ar	us		1	ar	like shit may allah honor allah shit clean application	Negative	1	0	0
Google Play Store	a06e16e2-2858-49d1-af5d-770e8db730cc	doen	Ahamad Abbas	##########			0	ar	us		5	ar	doen	Neutral	0	0	0
Google Play Store	ce724007-faef-40a7-a657-9a7bac984d56	Unfortunately, the application is no longer working for me. I hope it can return to how it was before the updates.	R Sh	##########			1	ar	us		1	ar	unfortunately application long work hope return update	Negative	0	1	0
Google Play Store	1c8d66c7-eb3d-4bd8-8baf-dd1b7ca2088f	The Ahly team has suspended its match.	Mustafa V 919	##########			0	ar	us		2	ar	ahly team suspend match	Negative	0	0	1
Google Play Store	0d93455c-f724-4141-aeb2-fb2aff01049a	Bad and the application does not open.	Hani Alfaifi	##########			0	ar	us		1	ar	bad application open	Negative	1	1	0
Google Play Store	bcf8cec5-67eb-421d-ac56-95d2b8511ab9	Very bad	منتظر خالد	##########			0	ar	us		2	ar	bad	Negative	1	0	0
Google Play Store	fedad5e6-b25a-42be-815c-3fc842e69cfc	Relatively good and we aspire for more.	ابو سعود	##########			0	ar	us		3	ar	relatively good aspire	Positive	0	0	0
Google Play Store	fe729a33-835e-4f12-991d-16bfe859a5e8	Very good.	عدنان عبدالكريم نعمان الذماري	##########			0	ar	us		5	ar	good	Positive	0	0	0
Google Play Store	4f91f161-1ece-46e1-93d7-746790b2aed5	The "CJDN" service does not work for me, and it does not accept messages or any kind of assistance. I need a complete change in the program.	محمدسيد Mobile	##########			0	ar	us		1	ar	cjdn service work accept message kind assistance need complete change program	Negative	0	1	0
Google Play Store	da4c9dd0-1829-45e6-b9bc-fe112c1f957a	It cannot be converted/changed.	مروان الحربي عبد الحميد	##########			0	ar	us		1	ar	convertedchanged	Negative	1	0	1
Google Play Store	77a7d497-28a8-4b2b-b992-99d63188f99b	These days are abnormal.	ابوفارس ABO FARIS	##########			0	ar	us		1	ar	days abnormal	Negative	1	0	0
Google Play Store	c808fbeb-6e37-4204-97b6-f21ab3b83225	The application does not work after updating.	Wael Mado	##########			0	ar	us		2	ar	application work update	Negative	0	1	0
Google Play Store	76411836-9a0f-4de4-8cef-d8a24d4e588b	Why can't I login to my account? Please fix the problem.	عبدالغني الشلبي	##########			0	ar	us		5	ar	cant login account please fix problem	Negative	0	1	0
Google Play Store	e86d1d36-d2d6-4826-9089-3340e71697f1	After the update, it does not open at all... 😠	اصايل	##########			0	ar	us		1	ar	update open	Negative	0	1	0
Google Play Store	3f29a2b0-03dc-4213-9a53-74e4ae223673	Very bad	طيبه الفارسي	##########			0	ar	us		1	ar	bad	Negative	1	0	0
Google Play Store	80d10309-e893-4c83-bee1-0b3cd2e57d79	Very very very bad application	hussein albidhni	##########			0	ar	us		1	ar	bad application	Negative	1	0	0
Google Play Store	2df0eaea-789e-48e1-9993-fdee7b36b2c0	It's bad, it hasn't been opening for months except through accessing it from Google Play.	ziad alhaji	##########			0	ar	us		2	ar	bad hasnt open months except access google play	Negative	1	1	0
Google Play Store	372d5263-8bd8-420b-b1d8-6af08bd67b0a	Good program	صالح حسين	##########			0	ar	us		5	ar	good program	Positive	0	0	0
Google Play Store	b6db967c-0004-4228-9988-253677fe6d2c	The application sometimes does not open.	manga 9639	##########			0	ar	us		1	ar	application sometimes open	Negative	0	1	0
Google Play Store	fe242175-562d-4405-8d33-6c6af48e82d0	It refuses to open with me after the update, and now it is hanging. I am outside the kingdom and I need to transfer.	علي عسيري	##########			0	ar	us		1	ar	refuse open update hang outside kingdom need transfer	Negative	0	1	1
Google Play Store	1928da50-f76e-4fa3-af1c-c567f67b4095	The application is not opening for me, it has been frozen for more than a week now. What is the problem?	Mohammed ibrahim	##########			0	ar	us		1	ar	application open freeze week problem	Negative	0	1	1
Google Play Store	558d42de-ce7c-47c6-9e88-f9b24e2b874e	Very excellent	Hamedah Alharbah	##########			0	ar	us		5	ar	excellent	Positive	0	0	0
Google Play Store	8a54df14-8e11-4425-bc33-42b81115e1d6	It doesn't open for me at all, very annoying 😈👽	بهية أبوعيشة	##########			0	ar	us		1	ar	doesnt open annoy	Negative	1	1	0
Google Play Store	6270d2dd-3967-4d6f-a653-21b7406fbb6a	It became bad and doesn't open anymore.	أسماء	##########			0	ar	us		1	ar	become bad doesnt open anymore	Negative	1	1	0
Google Play Store	7042961d-6dff-4dde-8eb0-f26287d6fc06	After the update, it is not possible to access the application.	Fa Sh	##########			0	ar	us		2	ar	update possible access application	Negative	0	1	0
Google Play Store	751b3a45-2f0d-445e-8d6b-111ee4566e9e	sdsf	Sad Sad	##########			0	ar	us		4	ar	sdsf	Neutral	0	0	0
Google Play Store	8ef609fc-02a7-47cd-a6dd-0e8cea207b8b	Beautiful	محمد عبده	##########			0	ar	us		5	ar	beautiful	Positive	0	0	0
Google Play Store	f6f698fa-4f89-43a9-b266-fb3300675af3	I am unable to log in, an error message appeared on the server. Please fix it quickly, I want to change my bank. The most important thing for me is to have a banking application that allows me to pay bills or transfer money.	أم الوليد العنزي	##########			0	ar	us		1	ar	unable log error message appear server please fix quickly want change bank important thing bank application allow pay bill transfer money	Negative	0	1	0
Google Play Store	d762556f-d38d-471c-953c-4d0af5bbed44	The latest update has a problem indeed.	م غا	##########			0	ar	us		1	ar	late update problem indeed	Negative	0	1	0
Google Play Store	e0cad4a7-18e6-4897-9a57-0c1a39b1b691	The application does not open.	TARIG Hashm	##########			0	ar	us		1	ar	application open	Neutral	0	1	0
Google Play Store	ac5b0b30-f356-422e-a897-51b4054fe542	The application does not work after the latest update.	afaq mix	##########			0	ar	us		1	ar	application work late update	Negative	0	1	0
Google Play Store	61964006-0468-4aba-a6f3-2e5dbbd397fd	The application is not working, I deleted it and downloaded it again, but it still does not work.	محمد الطويرب	##########			0	ar	us		1	ar	application work delete download still work	Negative	0	1	0
Google Play Store	a75dc513-1657-43e8-bdd4-16d49a0a839d	Very very very bad application.	أبو عزيز	##########			0	ar	us		1	ar	bad application	Negative	1	0	0
Google Play Store	b2590bc4-ad34-4198-931d-df1fce545c98	Program. The worst.	ابو علي	##########			0	ar	us		1	ar	program bad	Negative	1	0	0
Google Play Store	13c20bf4-965d-4af7-97b4-ec3b508dce17	The application has a problem, it does not open at all. You released a new update and it seems that the application developer programmed the new update while sleeping.	عز الدين القبلاني	##########			0	ar	us		1	ar	application problem open release new update seem application developer program new update sleep	Negative	0	1	0
Google Play Store	7475aa4b-b807-4710-bdc1-8e344188f7a6	I don't know how to use the program. How do I get the username and password?	سيمو زين	##########			0	ar	us		1	ar	dont know use program get username password	Negative	0	1	0
Google Play Store	707472a4-203c-455f-83c4-fbc134403bc5	Does not work very poorly	s s	##########			0	ar	us		1	ar	work poorly	Negative	1	1	0
Google Play Store	73ab8f03-2397-45fa-aaae-2b12f21c6dd3	In the name of Allah, Mashallah, the best application.	amir mousa	##########			0	ar	us		5	ar	name allah mashallah best application	Positive	0	0	0
Google Play Store	a881d6a0-218d-426f-af7c-f3c89043d73f	After the latest update, the application has become bad and it hangs. It does not allow access, so I had to uninstall the application and reinstall it multiple times. The problem was temporarily resolved but now the issue has occurred again, and it is hanging once more.	مشعل القحطاني	##########			62	ar	us		1	ar	late update application become bad hang allow access uninstall application reinstall multiple time problem temporarily resolve issue occur hang	Negative	1	1	1
Google Play Store	2d83de79-7cf3-453a-a262-e9c3e1c7a9d7	I wish for my electronic account to be restored without a review.	dgye165dsa@gmail.com dgye165dsa@gmail.com	##########			0	ar	us		5	ar	wish electronic account restore without review	Neutral	0	1	0
Google Play Store	f96ca5fc-edcf-42f5-a6d9-519c265916c2	Very bad.	عبد الله نجيب	##########			0	ar	us		1	ar	bad	Negative	1	0	0
Google Play Store	976cf33e-92b7-4c39-9526-0548271fbeeb	The application is very excellent. Please keep improving it more and more.	Mohamed Fox	##########			0	ar	us		5	ar	application excellent please keep improve	Positive	1	0	0
Google Play Store	db749d42-4ec9-4d09-ad0b-68b684ccfd7b	"And"	Rashed Aldosri	##########			0	ar	us		5	ar		Neutral	0	0	0
Google Play Store	0029ae87-5d49-4e56-9c74-aeb892f70c4b	Good, but the problem is that when I receive a transfer or deposit, the transferred or deposited amount does not appear in the application. So, if I want to pay or transfer to a beneficiary, I cannot do so and have to wait for hours until the amount appears in the application. I hope this problem can be resolved soon because it is frustrating for most people.	FS4706	##########			154	ar	us		3	ar	good problem receive transfer deposit transfer deposit amount appear application want pay transfer beneficiary wait hours amount appear application hope problem resolve soon frustrate people	Negative	1	1	0
Google Play Store	305a6508-e081-4843-80b5-a199ba46c2c4	The best application	محمد البشري	##########			0	ar	us		5	ar	best application	Positive	0	0	0
Google Play Store	e11e3ee9-a45a-4510-ac49-56d8cfaab18c	Excellent and very comfortable.	بدر عمر باصويلح باصويلح	##########			0	ar	us		5	ar	excellent comfortable	Positive	0	0	0
Google Play Store	35bc1113-aaac-4514-9df3-f19c98fd2d95	It's extremely bad. It's not working for more than two days, it's troubling me, and it's causing me a lot of frustration.	Dode Alharbi	##########			0	ar	us		1	ar	extremely bad work two days trouble cause lot frustration	Negative	1	1	0
Google Play Store	03a43f17-48ed-4baf-b63d-5cdcee4f994d	Very good.	راكان	##########			0	ar	us		5	ar	good	Positive	0	0	0
Google Play Store	48b18231-3d1d-4ad6-949e-58fb68635fb9	The application does not open at all.	ALI ALjuhani	##########			0	ar	us		1	ar	application open	Negative	0	1	0
Google Play Store	0ea886c6-2fcd-493a-ba21-351e4b96eea8	The application is good, but the new update is not good, and why do we receive a fee deduction of 5.75 and the transfer arrives after 4 or 5 days from Al Ahli account to Al Rajhi account.	عبد العزيز حيان	##########			2	ar	us		2	ar	application good new update good receive fee deduction transfer arrive days al ahli account al rajhi account	Negative	1	1	0
Google Play Store	834109b2-06cc-49b4-ba58-ed83b542d476	The application is lagging and won't open. ???	محمد عسيري	##########			0	ar	us		1	ar	application lag wont open	Negative	0	1	0
Google Play Store	2323d0ad-29bc-4c00-8f4d-b8b6941534dd	Very bad and slow, I do not recommend using it.	احمد علي	##########			0	ar	us		1	ar	bad slow recommend use	Negative	1	0	1
Google Play Store	82062f35-401d-44ff-b898-ab85d3631bd3	It is not worth it, not even a star. It has been hanging all day, and I cannot access my account even though I deleted it and reinstalled it twice. It's a very bad application. 😡😡	يوسف عبيد	##########			6	ar	us		1	ar	worth even star hang day access account even though delete reinstall twice bad application	Negative	1	1	1
Google Play Store	0b5e394c-a1e7-42de-b946-18d9c9a2fab7	Comment in the application always.	عٍبَدِآلُِرٍحٍمن آلُِ عٍيدِ	##########			0	ar	us		5	ar	comment application always	Neutral	0	1	0
Google Play Store	bcb0b15d-bc56-4adb-96e4-02296b1738ad	I hate working in the application market at Al Ahli Bank.	Mohamed Taher	##########			0	ar	us		1	ar	hate work application market al ahli bank	Negative	1	1	0
Google Play Store	84b6ef83-84aa-4412-9887-09ac676a9dc5	Bad	Ahmed Alwahedy	##########			0	ar	us		1	ar	bad	Neutral	1	0	0
Google Play Store	1c9265ba-ebc0-44ab-81df-d69d3f6a097b	Excellent	وليد الاحمري	##########			0	ar	us		5	ar	excellent	Positive	0	0	0
Google Play Store	c1aa2c36-f929-4d72-8a17-93a684bbf2f7	"The application is bad, it refuses to open after several attempts, and the problem still persists. Please solve the problem."	ابو فارس	##########			0	ar	us		1	ar	application bad refuse open several attempt problem still persist please solve problem	Negative	1	1	0
Google Play Store	ad1065c6-a504-4609-b662-f3d3feee6367	The application is very slow and there is no interaction from customer service.	ارم الفاضل	##########			0	ar	us		1	ar	application slow interaction customer service	Negative	0	0	1
Google Play Store	1e7d3b39-d8e8-42ee-82af-b192863fe170	Very bad.	محمد العبيدان	##########			0	ar	us		1	ar	bad	Negative	1	0	0
Google Play Store	8f6a1b8a-d431-4649-9481-67509e8fac59	Thank you.	Abdullah Almutairi	##########			0	ar	us		5	ar	thank	Positive	0	0	0
Google Play Store	d9749ebb-2e59-4a4e-a81c-6128d21bb99e	Movid Application	khaled m	##########			0	ar	us		5	ar	movid application	Neutral	1	0	0
Google Play Store	130dce3b-835b-4745-bcbf-da9f5d415725	Excellent program, it's nice and makes your journey easier.	نايف اليافعي	2023-08-09 05:09:00			0	ar	us		1	ar	excellent program nice make journey easy	Positive	0	0	0
Google Play Store	bfdda3f7-eddb-4878-9b80-24fa080ded03	What is working?	لبيب الشريف	##########			0	ar	us		1	ar	work	Neutral	0	1	0
Google Play Store	7ee71a11-5192-4688-b37f-ca8f9d72a37d	When I tried to open an account, it told me that I have a duplicate file. Please contact the branch. The worst attempt.	khalid kato	##########			0	ar	us		1	ar	try open account tell duplicate file please contact branch bad attempt	Negative	1	1	0
Google Play Store	6200edc5-7062-4806-b618-12544bcd6078	Shame on you! I mean, a bank as big as Al Ahli Bank doesn't have a working application like everyone else?! So how are we supposed to deal with this?	Hanan Mahmoud İbrahim	##########			0	ar	us		1	ar	shame mean bank big al ahli bank doesnt work application like everyone else suppose deal	Negative	1	1	0
Google Play Store	f1adaf38-a104-45cd-91d8-cbf3ca2e3ecf	Good.	‪Ali Hassan (Al-Sahifi)‬‏	##########			0	ar	us		4	ar	good	Positive	0	0	0
Google Play Store	5578c9b1-2ebc-42df-b59d-a10cdb992375	It's not a problem that the app sometimes freezes or doesn't work due to a temporary technical glitch. The SNB mobile app of Al Ahli bank is always malfunctioning, and this has been going on for over a year. I've heard that if you call their customer service, they don't respond. The Rajhi app is much better than this lousy bank.	ahmad alharbi	2023-08-08 07:03:00			2	ar	us		4	ar	problem app sometimes freeze doesnt work due temporary technical glitch snb mobile app al ahli bank always malfunction go year ive hear call customer service dont respond rajhi app much good lousy bank	Negative	1	1	1
Google Play Store	5a283e56-5673-41e4-aef5-fd3834a65fa5	Once again, I can't enter/it doesn't open. What's the solution?	أمل	##########			1	ar	us		1	ar	cant enterit doesnt open whats solution	Negative	0	1	0
Google Play Store	a5cd6142-1de6-4208-8f40-34b9f099f0f5	For the first time in my life, I see a bank without any deposits on Friday, Saturday, and most days of the week. Unfortunately, there are no deposits, for the worst?!	Muaid Ali	##########			1	ar	us		1	ar	first time life see bank without deposit friday saturday days week unfortunately deposit bad	Negative	1	0	0
Google Play Store	17b77941-250d-42a7-9794-c675ffdc48fc	Bad bank, bad.	‪youseef okbe (‫عقبي‬‎)‬‏	##########			1	ar	us		1	ar	bad bank bad	Negative	1	0	0
Google Play Store	aa40955e-1bd8-4cf6-91f6-e3697c6f8621	The application is extremely bad 😡😡😡😡	حمود القحطاني	##########			1	ar	us		1	ar	application extremely bad	Negative	1	0	0
Google Play Store	45a010dc-2635-41d5-b937-f4a85e304d64	Under experimentation.	عبدالله صالح الرامي الرامي	##########			0	ar	us		5	ar	experimentation	Neutral	0	0	0
Google Play Store	982e850d-f754-4019-8dcf-59b8d1420347	The application has been frozen for two days and won't open.	اصباغ الجبيل ورق جدران اصباغ ورق جدران ديكورات (ديكورات الجبيل الصناعيه)	##########			1	ar	us		5	ar	application freeze two days wont open	Negative	0	1	1
Google Play Store	5d95375c-7ed3-43b0-91be-e5d84cafa6bc	The application is not working, I hate the bank because of this application.	GooD MaN	##########			1	ar	us		1	ar	application work hate bank application	Negative	1	1	0
Google Play Store	4192908a-f51d-4e66-9769-2432d72cafcc	She was a star and used to be very good, but now she is bad.	مقاول يمني٠٥٥٥٧٠٨٧٠٦ ابوحسين	##########			1	ar	us		1	ar	star use good bad	Negative	1	0	0
Google Play Store	01b112e4-7989-40b4-8b86-6086679443ef	Good dealing	Yousef Al Bedaiey	##########			0	ar	us		3	ar	good deal	Positive	0	0	0
Google Play Store	d1201463-d978-46ab-8276-e8751b0580bd	Bad application, we apologize for the inconvenience. We apologize for the inconvenience. What is the point of being online?	عمر عبدالله	##########			1	ar	us		1	ar	bad application apologize inconvenience apologize inconvenience point online	Negative	1	1	0
Google Play Store	274eb038-a5ed-461c-ae66-0a56970056eb	The application is very very very very very very very very very difficult, I cannot log into it from my account.	محمد العامري اليافعي	2023-08-07 07:51:00			5	ar	us		1	ar	application difficult log account	Negative	1	0	0
Google Play Store	3729bc6b-1a10-437b-ae06-69fe19aa2844	Sorry, but our services are always down.	تسو العسولة	2023-08-07 07:37:00			1	ar	us		1	ar	sorry service always	Negative	1	1	0
Google Play Store	f1b25c9d-a48f-4c54-8a6c-5aadbf762444	Done.	Vcb c	2023-08-07 07:26:00			0	ar	us		5	ar	do	Neutral	0	1	0
Google Play Store	95064b77-f0a2-4d2d-9465-25df4b6e3503	The application does not open after the latest update.	عبدالله الحربي	2023-08-07 06:30:00			1	ar	us		1	ar	application open late update	Neutral	0	1	0
Google Play Store	69fbfc40-364e-49dc-83e1-88986062473d	The dirtiest application and the worst program.	عبدالواحد مهيوب	##########			1	ar	us		1	ar	dirty application bad program	Negative	1	0	0
Google Play Store	db162940-88ab-495f-8184-809f1bdea11e	the worst application	amro abas	2023-08-06 06:05:00			1	ar	us		1	ar	bad application	Negative	1	0	0
Google Play Store	6105ae08-5b6b-4cc0-a41a-b33dc2e0306b	Beautiful	zkryh hzazy	2023-08-06 00:37:00			0	ar	us		5	ar	beautiful	Positive	0	0	0
Google Play Store	d0ab66c2-df7a-424d-bc3e-90ea6677b1b5	It is not possible to add Sunday as a day for transfers or bill payments.	ماهر أمين	##########			0	ar	us		1	ar	possible add sunday day transfer bill payments	Negative	0	1	0
Google Play Store	80bd9bdb-4514-49a5-9db9-1cac44e88ee2	The application is not working. It says "Delay the connection with the server. Please solve the problem."	شركة شاشة الابداع فرع تبوك	##########			0	ar	us		1	ar	application work say delay connection server please solve problem	Negative	0	0	1
Google Play Store	d25b7cf5-a39e-4d11-b030-5f7960ce78c5	If I'm not limited to you, I swear I won't continue the company with a value of tens of millions. They cannot resolve a technical issue where the application is always offline late at night. What kind of nonsense is this? Your IT department, do they have a vacation or what? You're a star and they are untrustworthy.	ريان الزهراني	##########			1	ar	us		1	ar	im limit swear wont continue company value tens millions resolve technical issue application always offline late night kind nonsense department vacation youre star untrustworthy	Negative	1	1	0
Google Play Store	f29d08c3-8d3d-4e99-9e12-0a5dbdfb1d82	The application basically doesn't open .. I have downloaded it and deleted it almost five times and still it doesn't open .. What is the solution?	زهرة الياسمين	##########			1	ar	us		1	ar	application basically doesnt open download delete almost five time still doesnt open solution	Negative	0	1	0
Google Play Store	4d082c91-4d45-4a3f-8144-14cb781d2e46	The application is awful, and the person who made the new update is more awful than awful. It is shameful that there is a boot that can be placed on the neck of the person who made the update.	issa zeid	##########			1	ar	us		1	ar	application awful person make new update awful awful shameful boot place neck person make update	Negative	1	0	0
Google Play Store	a0310501-04ab-4025-84e8-874b542aeaa8	I no longer open the program.	Zaaxx sined	##########			0	ar	us		5	ar	long open program	Negative	0	1	0
Google Play Store	d239beb2-ad86-4ed1-85f9-956e0d4525b6	Easy browsing	Ali Al Khalifah	##########			0	ar	us		5	ar	easy browse	Positive	0	0	0
Google Play Store	2d321a17-75f4-4fd3-a725-e3d729ba6464	Very easy.	عباس مصطفي	2023-08-05 09:54:00			0	ar	us		5	ar	easy	Positive	0	0	0
Google Play Store	16656970-eb4d-42f7-9bf3-c5bbfbd51a15	Deserves excellence 100%.	عابد حمدي	2023-08-05 07:26:00			0	ar	us		5	ar	deserve excellence	Positive	0	0	0
Google Play Store	3c321c1f-484d-456e-9c97-ca0bdeb6e7a6	For those who are facing VPN issues, go to the settings of your mobile phone's network cards and disable the Wi-Fi Calling feature. It should work immediately, God willing.	Hossam Loutfi	2023-08-05 06:49:00			0	ar	us		2	ar	face vpn issue go settings mobile phone network card disable wifi call feature work immediately god will	Neutral	0	1	0
Google Play Store	a8f3c104-ae10-41c8-89b1-b56749f82867	Unfortunately, it is not possible to submit a complaint through the application. It has failed multiple times in sending, to be honest, it is a very bad application. The previous one was better and faster. I advise you to try the application before using it and consider its development. Al-Ahli bank needs a better application than this poor one.	Ibrahim Alhamad	2023-08-05 02:16:00			1	ar	us		3	ar	unfortunately possible submit complaint application fail multiple time send honest bad application previous one good fast advise try application use consider development alahli bank need good application poor one	Negative	1	1	0
Google Play Store	bb998173-488e-4ca8-acba-fa21d57583c7	Wonderful	Ali Ezz	2023-08-05 00:15:00			0	ar	us		5	ar	wonderful	Positive	0	0	0
Google Play Store	8b37a0fb-c3ec-439e-8787-17194d620708	Renewable always	طارق المدني	2023-08-05 00:06:00			0	ar	us		5	ar	renewable always	Positive	1	0	0
Google Play Store	7bc761d4-5b26-44e7-8fdf-549041ee67cb	Very	محمد منشاوي	##########			0	ar	us		5	ar		Neutral	0	0	0
Google Play Store	83c910b3-ad49-4f08-bded-c4512f028894	The application is frozen.	h g	##########			1	ar	us		1	ar	application freeze	Negative	1	0	1
Google Play Store	4921108f-02db-4b2f-9ebb-edf36a6b6b03	"A wonderful application that achieves its goal with full competence."	mohammed aldahham	##########			0	ar	us		5	ar	wonderful application achieve goal full competence	Positive	0	0	0
Google Play Store	7a758baa-8261-4bfe-95a5-80c24430e4ae	Lousy application 👎👎	قناة عرفان Irfan tube	##########			0	ar	us		1	ar	lousy application	Negative	1	0	0
Google Play Store	603cf0fb-00f6-42af-b297-93b83d985556	The application has become very bad. The latest update does not open, there is no data or Wi-Fi connection.	ماهر الوليدي	##########			1	ar	us		1	ar	application become bad late update open data wifi connection	Negative	1	1	0
Google Play Store	5e51566f-0bb0-461b-9614-4c01e30a5475	The application is not working and I cannot log into the application.	ختمة الياجزي	2023-08-04 08:05:00			1	ar	us		1	ar	application work log application	Negative	0	1	0
Google Play Store	3611bea2-f36f-4e7c-87bf-697a44a4302a	Every time I enter the data correctly, an error appears and I have to redo the data update. They charge a lot of money and still don't make a user-friendly application. All of this is at the expense of security.	حسين الحربي	2023-08-04 02:47:00			0	ar	us		2	ar	every time enter data correctly error appear redo data update charge lot money still dont make userfriendly application expense security	Negative	0	1	0
Google Play Store	e63941e9-4fe6-4f63-a6c2-ce7f97d7cd02	Thank you.	Nawaf Brave	2023-08-04 01:56:00			0	ar	us		5	ar	thank	Positive	0	0	0
Google Play Store	59ff27e7-4718-4f99-8e21-1ea8f23c478d	The application never opens, it is very bad.	Rasha Alotaibi	2023-08-04 00:42:00			0	ar	us		1	ar	application never open bad	Negative	1	1	0
Google Play Store	9e480c7e-e71e-408b-9fc9-532d5b618884	Good	King Pedar	##########			0	ar	us		5	ar	good	Positive	0	0	0
Google Play Store	1751f508-a5cc-462a-8a66-e10838130c7c	The new application needs a better update.	عبدالحكيم المنشاوي	##########			0	ar	us		3	ar	new application need good update	Negative	1	0	0
Google Play Store	fad1d427-2f9c-40ab-85e1-c99d36f06005	Very, very cool application.	أبو عبد الله الخولاني	##########			0	ar	us		1	ar	cool application	Positive	0	0	0
Google Play Store	eb012ab0-16d1-4ace-a974-150baa35b4f9	The application is very bad, it's not working now. Why are your services always the worst? Even your ATMs are terrible. Looks like we will close the account soon.	Omar Mohmmed	##########			0	ar	us		1	ar	application bad work service always bad even atms terrible look like close account soon	Negative	1	1	0
Google Play Store	c67f65a1-814a-4c07-b567-c44cf75df276	Speed and efficiency.	الخير بله	##########			0	ar	us		5	ar	speed efficiency	Positive	0	0	0
Google Play Store	57c1f7a6-2a54-4d42-9397-cc249c706da4	The application has become exceptional and the previous mistakes have been corrected.	محمد الخثعمي	##########			0	ar	us		5	ar	application become exceptional previous mistake correct	Positive	1	1	0
Google Play Store	7abb7e5a-0f31-44d6-8dcb-30d423ecc0de	Excellent application	Ayman Abdallah	2023-08-03 07:11:00			0	ar	us		4	ar	excellent application	Positive	0	0	0
Google Play Store	12cd93a6-f821-4613-9bcc-788d30bb3a22	"I have decided to cancel my account at Al-Ahli bank and transfer to Al-Rajhi bank, which respects its customers and always updates its application for them, introducing something new."	مسلم	##########			0	ar	us		1	ar	decide cancel account alahli bank transfer alrajhi bank respect customers always update application introduce something new	Neutral	1	1	0
Google Play Store	99ae4b18-ca80-47bc-be05-3b7c1d3a5742	The worst application I have ever seen in my entire life.	عبدالعزيز العسكري	##########			0	ar	us		1	ar	bad application ever see entire life	Negative	1	0	0
Google Play Store	b5ee8bd0-e67a-44e6-82e6-1081ee10aafd	This translates to "done" in English.	محمدعبده حسن البشري	##########			0	ar	us		1	ar	translate do english	Neutral	0	1	0
Google Play Store	cad04abc-794c-4868-829d-29e17578cdaf	Good	رده الحربي	2023-08-02 09:03:00			0	ar	us		3	ar	good	Positive	0	0	0
Google Play Store	bd2c3b50-aef1-4b34-bd85-798548e8392e	Bad	يحيى هتاني	2023-08-02 08:50:00			0	ar	us		1	ar	bad	Neutral	1	0	0
Google Play Store	15c8f014-e28a-4b68-9235-12c47e4aa8f1	The application is very bad, the latest update.	ابو ادم	2023-08-02 06:51:00			0	ar	us		1	ar	application bad late update	Negative	1	0	0
Google Play Store	452683cc-3bce-499f-a226-b445c9ec9f40	Since the last update, the application does not work for me.	Hussain AL- Darwish	##########			0	ar	us		1	ar	since last update application work	Negative	0	1	0
Google Play Store	1865d036-eadc-4aca-812f-e6b02d42fe3c	The application commentator is not opening.	بن ناصر	##########			0	ar	us		1	ar	application commentator open	Negative	0	1	0
Google Play Store	acce03d6-3d08-433e-95c9-55316513e0f8	Excellent!	علي مباركي	##########			0	ar	us		5	ar	excellent	Positive	0	0	0
Google Play Store	d5372995-1be5-4876-8d32-a524eafcfb35	The application is good, but its problem is the continuous updating.	سمية محمد	##########			0	ar	us		3	ar	application good problem continuous update	Negative	1	1	0
Google Play Store	323daad3-d1dd-4c54-a05a-d582d99d3907	Delayed authentication code messages	try1ksa	##########			0	ar	us		3	ar	delay authentication code message	Negative	0	0	1
Google Play Store	08b54703-15bd-4684-b882-d37b19f3e13f	I can't log in from another phone.	رائد الشلاحي	##########			0	ar	us		2	ar	cant log another phone	Neutral	0	1	0
Google Play Store	1b3ff1d9-86be-4a56-976a-827b24df8b40	The application is really nice and easy to use.	عبدالرحمن الذيبي	##########			0	ar	us		5	ar	application really nice easy use	Positive	0	0	0
Google Play Store	f0e2b5cc-f36e-4baf-8dab-60872d3aaaa1	Very beautiful.	Adeal Yaseen	##########			0	ar	us		5	ar	beautiful	Positive	0	0	0
Google Play Store	b08d2d4d-9ec5-4de2-8268-a082e06e689a	The application is completely inactive for me.	Sweet Candy	##########			0	ar	us		1	ar	application completely inactive	Negative	0	1	0
Google Play Store	c5e0b51e-424a-473e-b1ce-1373d4f4ff28	He has been unable to open the application for 3 days, neither through mobile network nor otherwise. Please fix the issue and thank you.	إسحاق آل عبد الرحيم	##########			0	ar	us		2	ar	unable open application days neither mobile network otherwise please fix issue thank	Negative	0	1	0
Google Play Store	d0139071-afa7-4a41-b169-3858353b7316	Excellent	ابو عبدالرحمن	##########			0	ar	us		5	ar	excellent	Positive	0	0	0
Google Play Store	ca3ae647-cd95-443c-9b4b-783d28b0d0c4	The application has not been working for two days. It won't open.	FROM Yemen	##########			0	ar	us		1	ar	application work two days wont open	Negative	0	1	0
Google Play Store	631bc09c-df22-4b70-9141-aa5f77ed351b	Amounts are deducted from my account and I don't know the reason, with the knowledge that I don't receive any messages or confirmation codes. The bank's customer service is very bad, they don't answer calls. Beware of scams.	TuBi Tubito	2023-08-01 05:38:00			3	ar	us		1	ar	amount deduct account dont know reason knowledge dont receive message confirmation cod bank customer service bad dont answer call beware scam	Negative	1	1	0
Google Play Store	9541d99f-1e51-4c4f-9c9f-be02e2e1257b	Excellent as usual.	Ahmed Morshedy	2023-08-01 02:57:00			0	ar	us		5	ar	excellent usual	Positive	0	0	0
Google Play Store	da9dd524-b7b8-43ea-8c7e-26d81cfcf0b5	Very good, excellent.	محمد يحي	##########			0	ar	us		5	ar	good excellent	Positive	0	0	0
Google Play Store	97fa1cf0-e8f4-493b-9e47-94974d4be500	The latest update is very bad.	Mohammad Hassan	##########			0	ar	us		1	ar	late update bad	Negative	1	0	0
Google Play Store	f8e575a6-87fc-40f7-9259-c4a16e8d4d1d	Very bad application, it wasted my time while I was trying with it.	سعد العمري	##########			0	ar	us		1	ar	bad application waste time try	Negative	1	0	1
Google Play Store	ab2995b6-cd2c-4595-956c-1df875678d89	The application is very, very, very, very... and the application does not open for me at all... I receive a message stating that the service is not available.	Mohammed Sdeeq	##########			76	ar	us		1	ar	application application open receive message state service available	Negative	0	1	0
Google Play Store	c5876b3a-e470-4591-be43-10a05320de3e	Excellent	ابو ساهر	##########			0	ar	us		5	ar	excellent	Positive	0	0	0
Google Play Store	eaa60212-c50e-44d1-8905-fbeff1dd82fe	Very beautiful and easy.	Ahmed Hilalia	##########			0	ar	us		5	ar	beautiful easy	Positive	0	0	0
Google Play Store	61c0d2ce-4698-49df-b0aa-671d691c74c1	Every time I tried to talk to him, he refuses to speak. What is the reason?	طارق ناصر	##########			0	ar	us		1	ar	every time try talk refuse speak reason	Negative	0	1	0
Google Play Store	fa72110a-8cad-41e5-b320-abe19be57793	I am being denied access to the application.	محمد حسين صالح اليافعي	##########			0	ar	us		2	ar	deny access application	Negative	0	1	0
Google Play Store	b6775459-bac8-41cd-a93d-da9bf0a40556	Good	بالصيق بالصيق	##########			0	ar	us		5	ar	good	Positive	0	0	0
Google Play Store	8e1af3b2-18b4-4e93-af08-09d252c3a215	Fantastic	مرزاح الدهمي711	##########			0	ar	us		5	ar	fantastic	Positive	0	0	0
Google Play Store	9210674a-70a4-4e12-81c6-2a78bf9cf053	After the update, it became very slow.	قرناس 2002	##########			0	ar	us		1	ar	update become slow	Negative	0	0	1
Google Play Store	5826a0f3-655a-4136-99b7-d08102075a82	Bad update causes the page to hang and login is impossible.	Minami	##########			0	ar	us		1	ar	bad update cause page hang login impossible	Negative	1	1	1
Google Play Store	33e489e5-fe12-4ca7-841b-edb17b76722c	The application is extremely bad, it hasn't been opening for more than a week.	عبدالله 1	##########			0	ar	us		1	ar	application extremely bad hasnt open week	Negative	1	1	0
Google Play Store	54e0faf0-8c0a-4f84-b5a1-626604c3d6e0	The application does not work at all. It does not open, it freezes, and displays an error message. It has been like this for a long time. I hope the developer responds and fixes the application quickly.	mohamad mmh	##########			0	ar	us		1	ar	application work open freeze display error message like long time hope developer respond fix application quickly	Negative	0	1	1
Google Play Store	591b7e52-6848-419c-8538-495af94565a5	Very very excellent.	Abu Mushtaq	##########			0	ar	us		5	ar	excellent	Positive	0	0	0
Google Play Store	ea9bb0ea-eca9-4749-85ff-60a3967de728	The latest update is very bad and Quick transfers have not been working for over a week. Please review the update.	Ahmed Amin	##########			10	ar	us		2	ar	late update bad quick transfer work week please review update	Negative	1	1	0
Google Play Store	49086d22-c9d2-4597-9e3d-7f40bfb5932a	Suspended, does not open.	عبداللة القرشي	##########			0	ar	us		1	ar	suspend open	Negative	0	1	1
Google Play Store	bb628e69-6015-4634-bfab-4c85183b437a	OK	بدر البدر	##########			0	ar	us		5	ar	ok	Positive	0	0	0
Google Play Store	c0a68871-9693-4207-935b-5147682db861	New	احمد كيلاني	##########			0	ar	us		5	ar	new	Neutral	1	1	0
Google Play Store	23ab1e18-e444-4474-8ce2-99588494c141	Why isn't the application opening?	ابوخالد العبدلي	##########			0	ar	us		1	ar	isnt application open	Negative	0	1	0
Google Play Store	14ae543b-6adf-4cf1-bbc8-77fd2f7a7df1	The application is excellent and is considered one of the best banking applications.	mahmoud tawfeeq	##########			0	ar	us		5	ar	application excellent consider one best bank applications	Positive	0	0	0
Google Play Store	d6c43ad8-b77d-4973-8bb7-d34a516bbb34	Excellent and good services.	يوسف الخامري	##########			0	ar	us		5	ar	excellent good service	Positive	0	0	0
Google Play Store	9794c0e4-fbe0-425a-aa3c-46c2fc8d78bc	Very bad application, it did not open with us after the update.	khaled m	##########			0	ar	us		1	ar	bad application open us update	Negative	1	1	0
Google Play Store	a4b634d0-e1da-4afe-a4fb-9e1ff9f990f0	A bank more beautiful than wonderful.	حافظ فيصل البشير الشكرية	##########			0	ar	us		5	ar	bank beautiful wonderful	Positive	0	0	0
Google Play Store	f6475e22-f651-4b42-99d7-c5a79bc83385	Excellence 🎖️	aymen idriss	##########			0	ar	us		5	ar	excellence	Positive	0	0	0
Google Play Store	37224891-fe8f-4da4-a19a-357639fcf46b	An excellent experience.	احمد المكاشفي	##########			0	ar	us		1	ar	excellent experience	Positive	0	0	0
Google Play Store	1add9451-16f7-4d6a-b09b-bc09f336cfb8	The best application ever.	محمد الحداد	##########			0	ar	us		5	ar	best application ever	Positive	0	0	0
Google Play Store	1fa21827-79a5-4f9e-ba15-2f371a150997	The worst application ever.	Silent heart	##########			0	ar	us		1	ar	bad application ever	Negative	1	0	0
Google Play Store	b55747a5-2514-4d5d-bd25-1a5fe18ce721	Good	Ahmad Altomihy	##########			0	ar	us		5	ar	good	Positive	0	0	0
Google Play Store	e71344c2-eb95-426d-9bf7-03cecdbb465b	Excellent.	عبدالرحمن الاسمري	##########			0	ar	us		5	ar	excellent	Positive	0	0	0
Google Play Store	b84fd913-0d41-4b59-afcd-3b69682321c4	It's not working for two days.	‪wael alshahethi (Eng waelali)‬‏	##########			0	ar	us		1	ar	work two days	Negative	0	1	0
Google Play Store	61499285-9480-4268-9a99-4d1289b988b3	Very elegant application.	Hamdy Mohammad	##########			0	ar	us		5	ar	elegant application	Positive	1	0	0
Google Play Store	bf656446-9fee-45ab-8255-e4ef7d1e736d	Very beautiful.	صالح الذبياني	##########			0	ar	us		5	ar	beautiful	Positive	0	0	0
Google Play Store	82b8088d-2def-4a0a-af7c-70df943351e6	May Allah always bless you and help us.	Hmdooo Alhmf	##########			0	ar	us		5	ar	may allah always bless help us	Positive	1	0	0
Google Play Store	b1278159-ba04-4eb1-a1b0-4557192aef07	Indeed, Allah and His angels send blessings upon the Prophet. O you who have believed, send blessings upon him and greet him with peace.	أيوب الحشيبري	##########			0	ar	us		5	ar	indeed allah angels send blessings upon prophet believe send blessings upon greet peace	Positive	1	0	0
Google Play Store	3ce26afb-39ac-4523-b2c5-3bf4517c8f7e	What happened since yesterday that it doesn't open and work?	1H6turbo	##########			0	ar	us		1	ar	happen since yesterday doesnt open work	Negative	0	1	0
Google Play Store	114101fb-c3df-403c-9682-aefb895d369e	Comfortable and easy, the best bank.	يوسف الحربي	##########			0	ar	us		5	ar	comfortable easy best bank	Positive	0	0	0
Google Play Store	eed7d7fe-a9e1-4bf0-b640-c5d31c61a632	Lati Mara - This phrase does not have a clear meaning in Arabic. It could be a misspelling or a slang term that requires further context to accurately translate. Please provide more information or clarify the phrase.	حاتم 999	##########			0	ar	us		1	ar	lati mara phrase clear mean arabic could misspell slang term require context accurately translate please provide information clarify phrase	Negative	1	1	0
Google Play Store	a42c4379-62ab-430a-8bab-32810ffc4a19	The application is the worst and the worst application. Al Rajhi's application is the best application, while the Al Ahli application is the worst application.	‪Fahad Mohammed (Fahood20)‬‏	##########			0	ar	us		1	ar	application bad bad application al rajhis application best application al ahli application bad application	Negative	1	0	0
Google Play Store	8f4c584e-fb30-4702-927e-8204184c45f6	I can't log in, the program is the worst.	عبدالرحمن الجهني	##########			0	ar	us		1	ar	cant log program bad	Negative	1	1	0
Google Play Store	6e9fb71a-199f-4da2-8a06-b10e0a3e6da0	Excellent very very very	عادل حنان	##########			0	ar	us		5	ar	excellent	Positive	0	0	0
Google Play Store	f65779b8-0519-48ef-847a-dfb7ed3a1108	Excellent	Muhammed Alfathih	##########			0	ar	us		5	ar	excellent	Positive	0	0	0
Google Play Store	6e1ea4d3-3824-41e8-bbe7-c54f48d0ef29	Why does it need to be updated every now and then without the ability to open the application?	Dina Fetyani	##########			0	ar	us		1	ar	need update every without ability open application	Negative	0	1	0
Google Play Store	44d9c92a-0c41-414a-84c0-675874c4e91b	Beautiful	abreham abreham	##########			0	ar	us		5	ar	beautiful	Positive	0	0	0
Google Play Store	b96e9d7b-18c0-4b15-b6c5-b601e416391e	My account status without contacting me.	Ali Mnaa	##########			0	ar	us		1	ar	account status without contact	Negative	0	1	0
Google Play Store	2b5da1e0-0a1b-4694-a0af-d562f7b0f6d8	Good	barak Mohammed	##########			0	ar	us		5	ar	good	Positive	0	0	0
Google Play Store	a7d65829-5c47-4cab-bd5f-bcebd16c8128	Good	Jb V	##########			0	ar	us		5	ar	good	Positive	0	0	0
Google Play Store	159ebcca-cc7a-4d16-a245-73721d9087a2	sfsaf	هانى عبد الوهاب	##########			0	ar	us		4	ar	sfsaf	Neutral	0	0	0
Google Play Store	bbd7f3fd-34a4-41a8-8e1a-298800c6fcec	The application is bad and inefficient. It has all sorts of comments and crashes during salary disbursement. You should learn from Al Rajhi.	Mohameed alonazi	##########			0	ar	us		1	ar	application bad inefficient sort comment crash salary disbursement learn al rajhi	Negative	1	1	1
Google Play Store	64b67610-46ea-4203-881f-57f37f265284	After the update, it became slow and bad.	عبداللطيف عبدالعزيز	##########			0	ar	us		1	ar	update become slow bad	Negative	1	0	1
Google Play Store	a229f33b-6f93-4712-93a5-02f087d969f0	A dissatisfactory bank and application. Very slow and impractical. I have been transferring my salary to Al Rajhi Bank's application for a year now.	تميم الحب	##########			0	ar	us		1	ar	dissatisfactory bank application slow impractical transfer salary al rajhi bank application year	Negative	1	1	1
Google Play Store	3fd84019-7747-4ced-9040-4664b24a794e	Unfortunately, on payday, there is an unusual, boring, and killer suspension of enjoyment and pleasure of receiving the salary.	سبحان الله وبحمده سبحان الله العظيم	##########			0	ar	us		1	ar	unfortunately payday unusual bore killer suspension enjoyment pleasure receive salary	Negative	1	0	1
Google Play Store	6d91f473-4181-4980-8530-0c15eb2aeb3b	I have a problem with the program itself, it doesn't open for me. Please find a solution to the problem as quickly as possible.	خالد الخضراء	##########			0	ar	us		5	ar	problem program doesnt open please find solution problem quickly possible	Negative	0	1	0
Google Play Store	73264de6-de1b-4615-b31c-5dbafbd0a162	Very weak application, especially with the decrease in salaries. It cannot handle the pressure, it freezes, and it does not accept some operations.	علي الحارثي	##########			0	ar	us		1	ar	weak application especially decrease salaries handle pressure freeze accept operations	Negative	1	1	1
Google Play Store	326e2e62-0ad8-49fb-abea-e9525c272bcd	The worst bank application that can happen to you, especially during salary deposits, you can't do anything, you can't pay or transfer. Every time I try to transfer, it gives me an error in the process, and this isn't the first time it happened to me. This happens to me almost every month with this transaction. 👎🏻	هاني المالكي	##########			0	ar	us		1	ar	bad bank application happen especially salary deposit cant anything cant pay transfer every time try transfer give error process isnt first time happen happen almost every month transaction	Negative	1	1	0
Google Play Store	7ce9d38f-6400-4d63-a327-9cc138523e5a	I bought something with an amount and received it declined, even though it was in stock.	أبووسيم الحربي	##########			0	ar	us		1	ar	buy something amount receive decline even though stock	Negative	0	1	0
Google Play Store	04e8aeb9-0c4e-4235-919b-fef6b402a1c9	Masha Allah, may Allah bless it.	عبدالله منصور	##########			0	ar	us		5	ar	masha allah may allah bless	Positive	1	0	0
Google Play Store	9dfe9612-e643-4a15-bf2c-24b4e5c5a54f	A very bad application. It always hangs and takes a long time to transfer money. I hope you fix it.	M A	##########			0	ar	us		3	ar	bad application always hang take long time transfer money hope fix	Negative	1	0	1
Google Play Store	64f40284-5bb2-43a6-89cd-f3a4b43cd366	Thank you.	Mohammed Alabdali	##########			0	ar	us		5	ar	thank	Positive	0	0	0
Google Play Store	232cf690-ad9f-453a-a442-3e31013255f8	Bad, doesn't work properly, always says there was an error.	فتافيت سكر	##########			0	ar	us		1	ar	bad doesnt work properly always say error	Negative	1	1	0
Google Play Store	30d5ca67-c65b-4565-85e1-4bdd962f20f2	Fun and fabulous	Khaled Khaled	##########			0	ar	us		5	ar	fun fabulous	Positive	0	0	0
Google Play Store	32c7d139-8a56-43c6-8030-8d3dae85ff32	Evil, evil, evil with no end.	فهد الروقي	##########			0	ar	us		1	ar	evil evil evil end	Negative	1	0	0
Google Play Store	b6947411-cf51-4be9-81af-426c1bbcee06	Very excellent and may Allah protect you.	مهدي هادي	##########			0	ar	us		5	ar	excellent may allah protect	Positive	1	0	0
Google Play Store	f1b266b6-33f7-4e31-aa06-64b5d8cdad8b	The application is bad and hasn't been working at all for two days.	Mahmoud Samarin	##########			0	ar	us		1	ar	application bad hasnt work two days	Negative	1	1	0
Google Play Store	df949ee1-ab3e-43e6-bffd-0e3be3c934aa	He is not as attached as before.	مشاري النمري	##########			0	ar	us		4	ar	attach	Neutral	0	1	0
Google Play Store	a9f9dd06-eec5-438d-9fac-8c3020cd0662	The service is excellent.	ناصر	##########			0	ar	us		5	ar	service excellent	Positive	0	0	0
Google Play Store	fc0e8011-4064-4d7f-a429-f411ecf8f90c	The application is very, very, very bad. I couldn't log in and create my account to use it. It's a very bad application, and I am surprised that Al-Ahli Bank has reached this level of weakness and incompetence. I am forced to withdraw all my funds and transfer them to the wonderful Al-Rajhi Bank and close my account with this bank, which is unable to fix the application and satisfy its customers.…	أحب أمي وأبي وأحب برهما	##########			19	ar	us		1	ar	application bad couldnt log create account use bad application surprise alahli bank reach level weakness incompetence force withdraw fund transfer wonderful alrajhi bank close account bank unable fix application satisfy customers decision firm god will	Negative	1	1	0
Google Play Store	591d0b74-de37-4a95-afc8-45bd72913045	Very good	Emad Sarhan	##########			0	ar	us		5	ar	good	Positive	0	0	0
Google Play Store	ee4efbac-23e6-4736-a49f-00e8067a117b	Good	وليد شويل	##########			0	ar	us		5	ar	good	Positive	0	0	0
Google Play Store	07f3aacf-9251-40e9-bd65-26b532c1cdd9	The application logged me out and I cannot log in after the latest update.	بيسو بيسو	##########			0	ar	us		1	ar	application log log late update	Negative	0	1	0
Google Play Store	46654fa2-cf12-4c78-8651-90015a6bcc73	Very excellent	رفعت احمد	##########			0	ar	us		5	ar	excellent	Positive	0	0	0
Google Play Store	34154998-d5d0-40f3-bef0-a8071a43aa3b	Excellent	حمرة مكي	##########			0	ar	us		4	ar	excellent	Positive	0	0	0
Google Play Store	6c06002f-3995-4a2d-a07a-b4990f5b6816	The niceest application that makes everything easy for you, deserves a thousand stars.	معذور المهري	##########			0	ar	us		5	ar	nice application make everything easy deserve thousand star	Positive	0	0	0
Google Play Store	19058b51-f9c9-481e-be59-7af2bdbfb9fb	Beautiful application	MOSTAFA Mostafa	##########			0	ar	us		5	ar	beautiful application	Positive	0	0	0
Google Play Store	348db917-f031-4ef0-8d41-85fdc074f7e9	Excellent	أبراهيم غروي	##########			0	ar	us		5	ar	excellent	Positive	0	0	0
Google Play Store	7891c8d8-51ec-44a0-8a84-84ce6a789fcd	Excellent and very smooth. I wish more progress and prosperity with success for everyone. Have a happy day.	ماجد محمد ياسين	##########			0	ar	us		3	ar	excellent smooth wish progress prosperity success everyone happy day	Positive	0	0	0
Google Play Store	8e01c43a-090a-49b9-8d94-aff8ba867a0a	An excellent application. Thank you, team, for your hard work.	Rkrk Jfj	##########			0	ar	us		5	ar	excellent application thank team hard work	Positive	0	0	0
Google Play Store	c00592eb-22e2-45d4-9006-4369c5e4add6	It takes a long time to download and open the program.	مستخدم Google	##########			0	ar	us		1	ar	take long time download open program	Negative	0	0	1
Google Play Store	6defdada-32cd-4edd-9921-8b7810f7b7d1	One of the best banks in electronic transactions and the fastest in processing requests .. Thank you.	S A Turk	##########			0	ar	us		5	ar	one best bank electronic transactions fast process request thank	Positive	0	0	0
Google Play Store	659f06f9-a7fb-478f-9b5f-7d3e16c15f2b	Alright	aaud aaud	##########			0	ar	us		3	ar	alright	Positive	0	0	0
Google Play Store	69288b50-8c39-46a2-92cb-44a762f038f4	A sum of money has been transferred from the account without my knowledge, and even the sender is unknown and there are no visible details about it. This means that security and confidentiality are not available.	Ghorm AL zhrany	##########			1	ar	us		1	ar	sum money transfer account without knowledge even sender unknown visible detail mean security confidentiality available	Negative	0	1	0
Google Play Store	e2ed7a1c-95da-4887-9b2f-ef6491b1a2af	Beautiful	حسن عسيري	##########			0	ar	us		5	ar	beautiful	Positive	0	0	0
Google Play Store	a362956c-d02e-4655-b986-2432558ab7cc	OK	عبدالله العمري	##########			0	ar	us		4	ar	ok	Positive	0	0	0
Google Play Store	453279e0-daeb-4299-98a9-394901dca678	Easy and convenient services, easier than other banks.	حمود الحميري	##########			0	ar	us		5	ar	easy convenient service easy bank	Positive	0	0	0
Google Play Store	32a1e858-e49d-4f5f-98f3-310e947e5257	The application is not working at all. Please update and solve the problem.	OPTIC ALATTAR	##########			0	ar	us		1	ar	application work please update solve problem	Negative	0	1	0
Google Play Store	dc93b0fd-cb76-4cf8-a87e-3127333bc2e0	Excellent, very very very excellent.	آل عتيق اليامي	##########			0	ar	us		5	ar	excellent excellent	Positive	0	0	0
Google Play Store	afd72093-08f7-4649-849c-a0cc24019c26	Your fantasy is everything, mashallah. You have exceeded the limits of Allah with usury.	صقر صقر	##########			0	ar	us		5	ar	fantasy everything mashallah exceed limit allah usury	Positive	1	0	0
Google Play Store	9f475875-3390-429a-9cf7-4fc451c8d654	In the case of cash deposit, it may take some time for the new balance to appear on the application, it could take up to an hour or more. I cannot transfer until then.	محمد نادي	##########			0	ar	us		3	ar	case cash deposit may take time new balance appear application could take hour transfer	Negative	0	0	1
Google Play Store	972aa4d0-a98d-479a-b3b8-1d6d8e79b477	Easy and enjoyable.	انس النواوى	##########			0	ar	us		5	ar	easy enjoyable	Positive	0	0	0
Google Play Store	9a055940-1c5f-41fc-8473-8c441a29dd9f	Thank you.	Abdullah	##########			0	ar	us		4	ar	thank	Positive	0	0	0
Google Play Store	39ab0e41-5582-487c-a0d2-929b99e903c9	Excellent very	حسن محمد	##########			0	ar	us		5	ar	excellent	Positive	0	0	0
Google Play Store	5a8c79da-3315-47b6-ad7a-65de9778b60e	Excellent	عبد الله عطرجي	##########			0	ar	us		5	ar	excellent	Positive	0	0	0
Google Play Store	4c157eb8-f692-4801-a696-99ee103c390d	Unique experience.	منير الشعبي	##########			0	ar	us		5	ar	unique experience	Positive	0	0	0
Google Play Store	050c334f-06e5-461c-ad6a-87cdecb9e94d	Peace be upon you. As for the application, it doesn't work on my phone at all. I even formatted my phone and tried uninstalling and downloading it again, but to no avail. When I open the application, I only see the bank logo and it stops there. I hope you can help me.	علي القادري	##########			1	ar	us		1	ar	peace upon application doesnt work phone even format phone try uninstalling download avail open application see bank logo stop hope help	Negative	0	1	0
Google Play Store	1466b48f-2c57-4ecb-a49e-232431951bd1	He is not willing to work at all.	ناصر الغامدي	##########			0	ar	us		1	ar	will work	Negative	0	1	0
Google Play Store	5e3c8ed7-ec78-414d-b7d8-ef88e2c65311	The	Khaleا Abdullah	##########			0	ar	us		5	ar		Neutral	0	0	0
Google Play Store	754d5626-9af3-4f18-ae2b-f2d3fe9535f1	Excellent	علي باسويد	##########			0	ar	us		5	ar	excellent	Positive	0	0	0
Google Play Store	803f5d88-5ab8-4d52-8744-d31b4765e535	Now, what time is it?	الهادي الدومة	##########			3	ar	us		5	ar	time	Neutral	0	1	0
Google Play Store	3831ebd3-703d-4d8e-bca2-73a8fd673211	More than wonderful	محمد الحذيفي	##########			0	ar	us		5	ar	wonderful	Positive	0	0	0
Google Play Store	93042ea1-0ede-4f3a-a41e-1fc8a0fd145f	One of the excellent applications.	M Alateeq	##########			0	ar	us		5	ar	one excellent applications	Positive	0	0	0
Google Play Store	e1b607d8-85fe-4d67-af2a-bd5df0c8bf3a	An extremely bad application that is slow and crashes constantly. We hope you address the problem as soon as possible. May Allah reward you with goodness.	عبدالله الاموي	##########			0	ar	us		1	ar	extremely bad application slow crash constantly hope address problem soon possible may allah reward goodness	Negative	1	1	1
Google Play Store	5d941339-2b8a-41ec-adac-330cbdfd6b55	Bad application after the update... An error message appears in the application... Failed to connect to the server 😡😡	أحمد مسفر مارق الغامدي	##########			191	ar	us		1	ar	bad application update error message appear application fail connect server	Negative	1	1	0
Google Play Store	ce7eeac0-5cac-4f7f-9708-54972637736d	Slowly	هدى العميري	##########			0	ar	us		1	ar	slowly	Neutral	0	0	1
Google Play Store	e3d3ab4e-e035-4489-bac7-66addb7ad08b	The application needs an update every time and it is not satisfied with being updated easily.	Jassmeena Ab do	##########			0	ar	us		1	ar	application need update every time satisfy update easily	Negative	0	0	0
Google Play Store	a7b6a723-70ac-490b-9a51-d440e45b825b	Very beautiful and easy.	حذيفه عبد الكريم	##########			0	ar	us		5	ar	beautiful easy	Positive	0	0	0
Google Play Store	c7bd7d6d-e5eb-4292-b7cd-a0042ed5f851	Thank you for this excellent work.	محمد اليافعي	##########			0	ar	us		2	ar	thank excellent work	Positive	0	0	0
Google Play Store	647532f8-32ef-44d0-91f0-5907ab06bd9a	I hope the transfer commission to Yemen is reduced. Thank you.	Helal Ghelan	##########			0	ar	us		5	ar	hope transfer commission yemen reduce thank	Neutral	1	0	0
Google Play Store	6856e96f-4e4a-4c6f-b716-a0ac6cd584e8	Wonderful	mhm b	##########			0	ar	us		5	ar	wonderful	Positive	0	0	0
Google Play Store	e950ff37-055a-45f2-b2c8-d6e6c20ad231	Thank you for your efforts.	هاني الحطبي	##########			0	ar	us		5	ar	thank efforts	Positive	0	0	0
Google Play Store	a0dedc28-a187-41f1-b9ce-b2a9e7cf6721	Very beautiful.	ناصر حسين عمر	##########			0	ar	us		5	ar	beautiful	Positive	0	0	0
Google Play Store	5907f738-df90-435a-bd86-5323a54a5ee7	Very bad application, it keeps asking for an update.	فيصل الزهراني	##########			0	ar	us		2	ar	bad application keep ask update	Negative	1	0	0
Google Play Store	bd6bb1d0-a27e-4a78-ab20-57c8dab4bf55	Unfortunately, you have regressed and there is no development at all. It is very bad.	Mohamed Wahed	##########			0	ar	us		5	ar	unfortunately regress development bad	Negative	1	0	0
Google Play Store	52049882-dbf8-4f5f-8de7-88fdd099d104	Why is the application not working?	نسيم البحر	##########			0	ar	us		1	ar	application work	Negative	0	1	0
Google Play Store	6396b845-e1fb-4e22-b445-011c7d81a38d	Good	بكري النيل	##########			0	ar	us		1	ar	good	Positive	0	0	0
Google Play Store	14ae27f0-0d86-44fb-ae4c-c05f93d03dbf	Lots of updates and Wi-Fi, and login data??	Ahmed Hosny	##########			0	ar	us		2	ar	lot update wifi login data	Neutral	0	1	0
Google Play Store	ca59f3ae-68f4-4b85-8103-c764b4eac81e	Excellent application! May you continue to progress, prosper, and succeed. Thank you very much. Inshallah, it will be credited to your good deeds. 🌷🌷🌷🌷🌷	Alfatih ابومشكاة	##########			0	ar	us		5	ar	excellent application may continue progress prosper succeed thank much inshallah credit good deeds	Positive	1	0	0
Google Play Store	2335799a-7a22-4942-9ce0-3c01a71fe433	A very, very, very, very bad application that does not open for days, it keeps freezing.	ادم الجرادي	##########			7	ar	us		1	ar	bad application open days keep freeze	Negative	1	1	1
Google Play Store	89600587-7d40-41c6-a1d5-5a847000af51	The application is very very bad.	خالد الرشيدي	##########			0	ar	us		1	ar	application bad	Negative	1	0	0
Google Play Store	7f656a09-a6dd-43a1-ad69-02420052fd95	The application does not open. I don't know what the reason is.	Mohammed Waked	##########			0	ar	us		5	ar	application open dont know reason	Negative	0	1	0
Google Play Store	8194538f-7f2e-433a-8987-4892f38b0a6a	Excellent and classy service.	سبحان الله لا إله إلا الله	##########			0	ar	us		5	ar	excellent classy service	Positive	0	0	0
Google Play Store	e944d108-c284-4781-a38f-b3e31d294950	Thank you, very excellent application.	ATEEQ Haitham Saeed AHMED bin Shujaa	##########			0	ar	us		5	ar	thank excellent application	Positive	0	0	0
Google Play Store	ff7b0036-74df-42d0-af9a-e7394a22b239	Peace be upon you and the mercy and blessings of Allah. I am well-known for my comments, and I only speak the truth. Honestly, this is the best banking application I have tried, and I hope for even better from Al-Ahli Bank. Keep up the great work and may everyone love you for improving your services and increasing the number of ATMs and branches. This is your only flaw. Your brother and admirer i…	قناة : ماهر الاحمر	##########			0	ar	us		3	ar	peace upon mercy blessings allah wellknown comment speak truth honestly best bank application try hope even good alahli bank keep great work may everyone love improve service increase number atms branch flaw brother admirer allah loyal customer maher bin saleh alahmar kingdom saudi arabia alahsa	Positive	1	0	0
Google Play Store	94eb31ef-b9e7-4611-bc0a-48bda9ed0889	Very good.	NaS eEm	##########			0	ar	us		5	ar	good	Positive	0	0	0
Google Play Store	953dfacf-6887-442e-a9a4-3887e6b8a731	After the last update, the local transfer fee has increased from one riyal to five riyals in one go. What happened?	Sami Alaleemi	##########			0	ar	us		1	ar	last update local transfer fee increase one riyal five riyals one go happen	Neutral	0	1	0
Google Play Store	7b471053-4673-4bbe-b4db-5aa6569f76fd	I kindly request you to improve it for the better, as it tends to lag a lot.	فهد الحربي	##########			0	ar	us		5	ar	kindly request improve good tend lag lot	Neutral	1	0	0
Google Play Store	9577b45f-ea6f-4846-b23f-a4817c846531	Distinctive	Hasan Al	##########			0	ar	us		5	ar	distinctive	Neutral	1	0	0
Google Play Store	13aa94c2-3ecb-4a1e-867d-5dd73867f041	The application is bad, to the worst degree. It keeps asking me to enter data and open access, but everything goes in vain. There is no solution, may God be my support.	تعليم الهكر	##########			0	ar	us		1	ar	application bad bad degree keep ask enter data open access everything go vain solution may god support	Negative	1	0	0
Google Play Store	1509dfbf-f007-4caa-9174-4b9edde135e2	Very very very beautiful.	RMDAN MAOMAN	##########			0	ar	us		5	ar	beautiful	Positive	0	0	0
Google Play Store	fd971939-8343-4242-978f-7efdb9aad097	Good program	ناصر حمدي	##########			0	ar	us		5	ar	good program	Positive	0	0	0
Google Play Store	744f1779-e7a4-4e5f-b78d-cc7ffa1295b7	Beautiful application	محمد عابد	##########			0	ar	us		5	ar	beautiful application	Positive	0	0	0
Google Play Store	5bef5415-017b-429a-a914-f80be96d201c	To the better, god willing.	Issa AlAwadh	##########			0	ar	us		5	ar	good god will	Positive	0	0	0
Google Play Store	2e60bedd-eb27-43fa-9785-ee6dbee01087	Very beautiful 👍	Joker 0007	##########			0	ar	us		5	ar	beautiful	Positive	0	0	0
Google Play Store	0e54d003-3949-490e-a3d3-671080c5d8b5	God bless you all.	محمد ابوبكر كوبا	##########			0	ar	us		5	ar	god bless	Positive	0	0	0
Google Play Store	1592d25e-d85f-4441-ad32-c66b4d3005d9	Excellent	عبدالله البركاني	##########			0	ar	us		5	ar	excellent	Positive	0	0	0
Google Play Store	c8d7ecc0-d2ee-4013-a082-117e3ed8e042	Very nice	شاهر الاهدل	##########			0	ar	us		5	ar	nice	Positive	0	0	0
Google Play Store	38aa0c03-0877-4223-874a-dffb44e97ce7	Excellent application, Mashallah.	عبيد العوض	##########			0	ar	us		4	ar	excellent application mashallah	Positive	0	0	0
Google Play Store	b36d93e6-ea44-41b6-a6e6-b6fc56ddc10b	Bad application, I hope the application develops like Al Rajhi Bank application.	yaseen Kanki	##########			0	ar	us		1	ar	bad application hope application develop like al rajhi bank application	Negative	1	0	0
Google Play Store	b84d355e-d9bd-446d-84d8-03024643f48c	There are some problems.	saad alhelaly	##########			0	ar	us		1	ar	problems	Negative	0	1	0
Google Play Store	5cc1b8bd-5042-4abb-9712-ba5c587d7659	Excellent	بخيت الاكلبي	##########			0	ar	us		5	ar	excellent	Positive	0	0	0
Google Play Store	32b1a3fa-59a7-493f-8eee-47c196511e6f	Any failed update procedure.	Fayiz Naser	##########			0	ar	us		1	ar	fail update procedure	Negative	0	1	0
Google Play Store	497d786e-e5eb-457a-bb4f-77ccaf5c30de	Excellent application and smooth in dealing and very comfortable to use ❤️❤️	موسى بشير	##########			4	ar	us		5	ar	excellent application smooth deal comfortable use	Positive	0	0	0
Google Play Store	3ab6b338-841c-4dff-8df9-a4d1c092afc5	Excellent experience	ماا فياا	##########			0	ar	us		5	ar	excellent experience	Positive	0	0	0
Google Play Store	8174c7e0-261b-4989-b1d0-25178e2b9b5b	A really terrible thing with the update.	الدسوقي forever	##########			0	ar	us		1	ar	really terrible thing update	Negative	1	0	0
Google Play Store	10ec8d69-81f4-46da-b6af-7bfcb81a2b7c	nice	Saleh Alkomem	##########			0	ar	us		5	ar	nice	Positive	0	0	0
Google Play Store	0f8c2321-5796-4d13-b7cb-405e34f912f9	Excellent	Suleiman Alguthmi	##########			0	ar	us		5	ar	excellent	Positive	0	0	0
Google Play Store	01d37344-1d7b-435d-a293-6f2161dd5341	The best bank in the kingdom.	ابراهيم عثمان	##########			0	ar	us		5	ar	best bank kingdom	Positive	0	0	0
Google Play Store	3cd15717-6f60-4c99-9fee-18f0480c9765	Good.	نجيب عبدالله سلمان	##########			0	ar	us		5	ar	good	Positive	0	0	0
Google Play Store	1b456af6-2706-42a9-91fd-e24a0f045754	Beautiful.	Ismail adam Blooola	##########			0	ar	us		5	ar	beautiful	Positive	0	0	0
Google Play Store	3c92070a-7b9e-4f0d-90ae-05d50c1e77d6	I had a bad experience with the Al-Ahli application; it did not work for me in Sudan.	خالد حسن عثمان	##########			0	ar	us		1	ar	bad experience alahli application work sudan	Negative	1	1	0
Google Play Store	1587fbf8-f257-409a-a98e-735ca310cc45	Good.	Ahmed Gooda	##########			0	ar	us		5	ar	good	Positive	0	0	0
Google Play Store	5b50a2c6-b3f3-4bc7-8fc9-8261f5692c8d	Excellent very much	Mahmoud Ahmed	##########			0	ar	us		5	ar	excellent much	Positive	0	0	0
Google Play Store	47c1e586-1b5c-4694-a265-40e6844d004c	The update is very, very bad. I hope they update it again because it doesn't work unless I'm connected to the mobile network. I really don't know what to do.	ساره السبيعي	##########			0	ar	us		1	ar	update bad hope update doesnt work unless im connect mobile network really dont know	Negative	1	1	0
Google Play Store	78c7857e-c4a2-4138-918e-835c3c5f6ae7	The most beautiful bank.	Osama Aljohani	##########			0	ar	us		5	ar	beautiful bank	Positive	0	0	0
Google Play Store	46451f4e-f946-4de4-9106-7a4f90fc73fe	When you connect to Wi-Fi, someone can potentially access your account and steal the money in it. The security in this matter is that they restrict your access to the Al Ahli bank app only through your mobile network. As for me, I go to any office that has an ATM, pay the bill, and the network returns in its designated time. At first, I was annoyed by it, but then I understood the purpose and lik…	Falooofancy Keyloveley	##########			0	ar	us		5	ar	connect wifi someone potentially access account steal money security matter restrict access al ahli bank app mobile network go office atm pay bill network return designate time first annoy understand purpose like app work perfectly late update	Neutral	1	1	0
Google Play Store	0ae491ed-2454-4b35-a17a-564e6b4565cd	A very very useful program.	ABOOD WADY	##########			0	ar	us		5	ar	useful program	Positive	0	0	0
Google Play Store	1f2ef62b-dd5b-44d1-bebe-3d4262effbbd	Excellent and very easy, Mashallah.	بنبتو يووث	##########			0	ar	us		5	ar	excellent easy mashallah	Positive	0	0	0
Google Play Store	3fcdbc41-48af-4026-9867-81736c5b2858	Bad	العالم الان	##########			0	ar	us		1	ar	bad	Neutral	1	0	0
Google Play Store	c65a439a-2cd5-4bd0-8794-32a5a65fdac4	Bad application, every two days there is a new update, and after the last update it says the virtual network cannot be used.	Naif Hwsawi	##########			8	ar	us		1	ar	bad application every two days new update last update say virtual network use	Negative	1	0	0
Google Play Store	9b918787-5aab-4eea-afe7-af6412fe40d7	Excellent, I recommend it.	ابوعلي Sh	##########			0	ar	us		5	ar	excellent recommend	Positive	0	0	0
Google Play Store	4b5cd725-2fc0-4bf0-a70b-6605a78b1b96	May God keep you busy and the bad update. I wish you would fix the inconvenience.	yasmeen all	##########			0	ar	us		1	ar	may god keep busy bad update wish would fix inconvenience	Neutral	1	0	0
Google Play Store	8d08aa2a-417e-44f5-8484-6c197d0e3c24	Very bad application after the latest update, it doesn't accept Wi-Fi network and only works on mobile network. Please solve this problem, we cannot use the application.	murtada ali	##########			75	ar	us		1	ar	bad application late update doesnt accept wifi network work mobile network please solve problem use application	Negative	1	1	0
Google Play Store	37843789-0e07-4829-aa8a-20aadf57b60a	The application is very nice and useful, and all banking services can be accessed with just a click of a button while you are at home.	مبخوت بن محمد الصيعري (ابو محمد)	##########			0	ar	us		4	ar	application nice useful bank service access click button home	Positive	0	1	0
Google Play Store	12cc7747-6c8e-41df-889a-22aff2af6452	The application is beautiful and helpful.	danah marzoug	##########			0	ar	us		5	ar	application beautiful helpful	Positive	0	0	0
Google Play Store	5a15cea5-178f-414a-b686-2e3849e4dc0a	Excellent and useful application.	مريم المالكي	##########			0	ar	us		5	ar	excellent useful application	Positive	0	0	0
Google Play Store	67a6a8cf-55bf-46b7-bfcf-ceffb392c4b6	They are the worst in every sense of the word, most of the time they do not work.	KHALED hasn	##########			0	ar	us		1	ar	bad every sense word time work	Negative	1	1	0
Google Play Store	da3a7968-9907-4b2a-8c4b-f05ae0ee93d3	There is no harm in it.	ALSADG ALSDDIG	##########			0	ar	us		4	ar	harm	Neutral	1	0	0
Google Play Store	93cf1276-b3f8-44fa-849d-6845f5ce6e7b	Smooth	alaa Ismail	##########			0	ar	us		5	ar	smooth	Positive	0	0	0
Google Play Store	d3bd2164-f859-4347-9aa5-f0cb59bc19da	Thank you very much, Al Ahli Bank, for the excellent services.	يحيى اجريبه	##########			0	ar	us		5	ar	thank much al ahli bank excellent service	Positive	0	0	0
Google Play Store	19a6ec6c-f470-428e-b270-305ac9216898	Easy, fast, clear, and organized. Thank you for your attention.	M MAM	##########			4	ar	us		5	ar	easy fast clear organize thank attention	Positive	0	0	0
Google Play Store	74234dfa-5ede-4440-961c-15ee9b175f9f	Money is your first and last concern. With every update, it consumes 8 megabytes. 😊👍	برق الحيا	##########			0	ar	us		1	ar	money first last concern every update consume megabytes	Positive	1	0	0
Google Play Store	c00589d0-3a8c-4769-9606-17a7ac53f180	I am outside of Saudi Arabia. The application has been giving me the message "We apologize, there is currently a problem in the system and we will fix it." Unfortunately, it is not working. What should I do?	xb 6600	##########			0	ar	us		1	ar	outside saudi arabia application give message apologize currently problem system fix unfortunately work	Negative	0	1	0
Google Play Store	401f6bbd-bb30-490c-bb8c-97393e77bc7a	You are bad in all your situations.	إرمياء	##########			0	ar	us		1	ar	bad situations	Negative	1	0	0
Google Play Store	4f0c83fb-32f2-49a0-90fa-426edfd3f3fb	Very excellent	المحتسب الجنوبي	##########			0	ar	us		5	ar	excellent	Positive	0	0	0
Google Play Store	e6fb2623-52be-4f1f-8d08-69acea1ca886	Ease, quality, safety.	Najm .f	##########			0	ar	us		5	ar	ease quality safety	Neutral	0	0	0
Google Play Store	48b0e31d-c9be-43bb-b5ba-11503152a6ad	very bad	عبدالله الزهراني	##########			0	ar	us		1	ar	bad	Negative	1	0	0
Google Play Store	fcdb58c5-f085-435f-ab68-a9f99a534cc8	The application is not willing to update.	بدر بوسجاد	##########			0	ar	us		1	ar	application will update	Negative	0	1	0
Google Play Store	357c7ac0-6eb8-4077-b66a-abc8e2959d1a	Smooth performance	alaa rezo	##########			0	ar	us		5	ar	smooth performance	Positive	0	0	0
Google Play Store	7c763cc3-2da4-4339-acba-370a2b863bbb	Excellent.	خالد خالد	##########			0	ar	us		5	ar	excellent	Positive	0	0	0
Google Play Store	8363786c-e1a5-4330-a4dc-57a0dededc61	Very good.	خالد على	##########			0	ar	us		5	ar	good	Positive	0	0	0
Google Play Store	a8fbcd78-942c-4884-8968-c5e70f0b03ef	Excellent and enjoyable.	Hdhd Hdh	##########			0	ar	us		5	ar	excellent enjoyable	Positive	0	0	0
Google Play Store	6f97ca75-ca4a-4f69-baaa-a4e748e925d7	Excellent and easy application.	محمد محمود	##########			0	ar	us		5	ar	excellent easy application	Positive	0	0	0
Google Play Store	a5c76a2e-963b-48d2-b466-c6d0ecdceb71	"You haven't improved anything or added anything, even if it had less than a star, it would still be valued with it 👎👎"	A B	##########			0	ar	us		1	ar	havent improve anything add anything even less star would still value	Negative	0	1	0
Google Play Store	f4654e73-ccc5-4442-8539-3bfb681a4698	I hope for continuation and constant progress.	Saad Bakhit	##########			0	ar	us		5	ar	hope continuation constant progress	Positive	1	0	0
Google Play Store	87e37ba8-5d94-4454-930c-7360917e780c	Poor services in banks and in the application.	Mohammed Al Sharabe	##########			0	ar	us		1	ar	poor service bank application	Negative	1	0	0
Google Play Store	01db436f-4aeb-4383-a8e5-df344c3766c4	Excellent	موسي عاتي	##########			0	ar	us		5	ar	excellent	Positive	0	0	0
Google Play Store	0e8929f7-a49b-409f-84d6-ff006006f2f7	Mata'ab did not update the information, and the account is frozen for no reason.	بندر العرابي	##########			0	ar	us		1	ar	mataab update information account freeze reason	Negative	0	1	1
Google Play Store	4e4104e1-f17f-43fd-8298-570448fea39e	One of the worst banks after Al-Riyadh Bank is Al-Rajhi Bank, there is no better bank than Al-Rajhi in electronic services.	سليمان العبدالله	##########			0	ar	us		1	ar	one bad bank alriyadh bank alrajhi bank good bank alrajhi electronic service	Negative	1	0	0
Google Play Store	30b08ef9-6176-4845-be4a-ac8352127f9b	Excellent and very impressive 👌 Everything is easy and you can easily execute any service.	أبو عمار	##########			2	ar	us		5	ar	excellent impressive everything easy easily execute service	Positive	0	0	0
Google Play Store	a3c0d403-1299-4b5f-a52a-6703a30bf195	Excellent	رابح ادم الدخيري	##########			0	ar	us		5	ar	excellent	Positive	0	0	0
Google Play Store	bd2e0d7c-09bf-442b-9796-303c3d7ced38	Al Rajhi application is much better than Al Ahli.	ابو خالد	##########			0	ar	us		1	ar	al rajhi application much good al ahli	Positive	0	0	0
Google Play Store	36862e90-5da8-4dd2-b7f6-96f236d5459e	Accessing the application is easy with the option of quick login. Browsing has become easier.	candycotoon	##########			26	ar	us		5	ar	access application easy option quick login browse become easy	Positive	0	1	0
Google Play Store	d8baed94-d14c-44f4-b433-ff081fc9aa1a	Honestly, the best Saudi bank you can deal with.	Abdullah Mohmmad	##########			0	ar	us		5	ar	honestly best saudi bank deal	Positive	0	0	0
Google Play Store	b3ab4a86-4acb-4572-9689-43fd48be4dcb	You keep bothering us with updates all the time.	Ahmed 55	##########			0	ar	us		5	ar	keep bother us update time	Negative	1	0	0
Google Play Store	ee493017-adfb-454d-8734-fb77a5cb5227	Excellent and very easy to deal with.	محمد السعيدي	##########			0	ar	us		5	ar	excellent easy deal	Positive	0	0	0
Google Play Store	35b3f509-5b8c-4f6a-b85b-bba02667dbfc	Thank you very much for the best and fastest application in all banks 🌹	فواداحمد عبدالله	##########			0	ar	us		5	ar	thank much best fast application bank	Positive	0	0	0
Google Play Store	77063061-3d23-488d-9672-13a03dad32f9	Every time I open the application, it requires an update and they release updates daily. To the point that the application is the worst! They cannot provide a good update that stays for a while like other banks.	G-F	##########			0	ar	us		1	ar	every time open application require update release update daily point application bad provide good update stay like bank	Negative	1	1	0
Google Play Store	88ee0c51-c33f-48d9-bbfb-21c7032efe5d	Excellent	A B	##########			0	ar	us		5	ar	excellent	Positive	0	0	0
Google Play Store	23dcdda1-40a1-44e6-b61f-1d39b7723dea	Difficult to update.	ابو عبدالله	##########			0	ar	us		1	ar	difficult update	Negative	1	0	0
Google Play Store	02b86877-dee6-47ee-8f7b-53ae1bc6877e	Huge	G Fu	##########			0	ar	us		4	ar	huge	Positive	0	0	0
Google Play Store	a584bbaa-df78-43f5-ba6b-aaaa04c31924	The best bank is Al-Ahli.	احمد عبده الحكمي	##########			0	ar	us		5	ar	best bank alahli	Positive	0	0	0
Google Play Store	c4bc22d1-72e4-4dd1-a482-9c3c0f9bd0bc	Something strange and inappropriate.	الفنتاري الزغلول Zglool	##########			0	ar	us		1	ar	something strange inappropriate	Negative	1	0	0
Google Play Store	8a16c854-cbcb-4ef3-a2c3-f468856c046c	Beautiful	Abdoh abdoh	##########			0	ar	us		5	ar	beautiful	Positive	0	0	0
Google Play Store	a9b2bc32-1eda-49dc-a83c-13e88f5afd8a	With the latest update, the application does not open at all.	Mohamed Alzoughpy	##########			0	ar	us		2	ar	late update application open	Negative	0	1	0
Google Play Store	9a61e5e0-2400-4f33-8f30-9e3bd809391f	White	المؤسس عثمان ارطغرل	##########			0	ar	us		5	ar	white	Neutral	1	0	0
Google Play Store	17463746-1ea1-4440-9ab5-c65de2b96956	Very excellent/very good.	هادي هتان	##########			0	ar	us		5	ar	excellentvery good	Positive	0	0	0
Google Play Store	f239c12c-6273-49c6-83e9-644ef741268b	The application has become dishonest after receiving credit cards. It does not show the remaining balance in the current accounts. We have to wait for another day to confirm the balance. Please solve the problem. Thank you.	عماد حتحت	##########			0	ar	us		3	ar	application become dishonest receive credit card show remain balance current account wait another day confirm balance please solve problem thank	Negative	1	1	0
Google Play Store	c03f9411-8b72-47b1-8fc7-0d8fd1502c0f	Excellent	سعد النفيعي	##########			0	ar	us		5	ar	excellent	Positive	0	0	0
Google Play Store	3fe171a5-6cc4-4e16-afbc-93a6c3f7582e	Awesome very	محمد عبدالله محمد	##########			0	ar	us		5	ar	awesome	Positive	0	0	0
Google Play Store	90d1f348-99c1-4aac-8709-3279ae66dfc2	Excellent, very good 👍❤️	‪al motlaq (Mjɴooɴk, Z)‬‏	##########			0	ar	us		5	ar	excellent good	Positive	0	0	0
Google Play Store	46cd0c0d-fe94-4fc8-b2c9-8db7e87381d6	Excellent and comfortable, it saves a lot of time and effort.	Osman abdelrahman Ali hussein	##########			3	ar	us		5	ar	excellent comfortable save lot time effort	Positive	0	0	0
Google Play Store	26873933-51b0-4ed1-9095-b8585c3446fa	The application is not as easy to use as before in transactions.	الهادي النور يوسف الفكى	##########			0	ar	us		1	ar	application easy use transactions	Negative	0	0	0
Google Play Store	11144378-fc98-4f6a-b893-47ad90387f59	Very beautiful.	عبدالله مسعود السعدان	##########			0	ar	us		5	ar	beautiful	Positive	0	0	0
Google Play Store	7cdf613e-da30-4600-86f5-cbbf2738c392	They brought back the old update, it is easy and smooth.	sadeg jamlalil	##########			0	ar	us		2	ar	bring back old update easy smooth	Positive	0	0	0
Google Play Store	9ae82b39-9c7d-46b8-af95-ab2043a2892a	Beautiful	ahmed elblat	##########			0	ar	us		5	ar	beautiful	Positive	0	0	0
Google Play Store	5e7f8074-94a4-455e-afcb-6f254490bd3c	Good after the update.	عبدالعزيز الحميد	##########			0	ar	us		4	ar	good update	Positive	0	0	0
Google Play Store	5c07c20b-ebf2-4def-8f26-3803163b347d	Excellent application	Ahmed Hassan	##########			0	ar	us		4	ar	excellent application	Positive	0	0	0
Google Play Store	401c6d89-81d3-49ce-aee8-749b63f8ab10	Excellent.	Ali bnawi	##########			0	ar	us		4	ar	excellent	Positive	0	0	0
Google Play Store	35dde1ec-e2ae-4547-a627-c6872564e1b1	Excellent	فؤاد اليافعي	##########			0	ar	us		5	ar	excellent	Positive	0	0	0
Google Play Store	4e390bff-e722-4ee1-83d1-67f5d7edbf08	Excellent	محمود مسعد	##########			0	ar	us		5	ar	excellent	Positive	0	0	0
Google Play Store	f4261e50-d749-43e3-84e6-719cfa57341f	Excellent application and easy to use 👍👍	أبو ناظم	##########			0	ar	us		5	ar	excellent application easy use	Positive	0	0	0
Google Play Store	187ce47e-3b40-4971-bae7-1cfbb885a77f	It is not worth evaluating due to usage restrictions.	misho media	##########			0	ar	us		1	ar	worth evaluate due usage restrictions	Negative	1	0	0
Google Play Store	3d0da27c-3a33-4142-aeae-774b23e34e66	Very excellent.	Arif Sultanalkhalifah	##########			0	ar	us		5	ar	excellent	Positive	0	0	0
Google Play Store	ab85931a-fa0e-46f0-b143-10210e24dfb8	Masha Allah, it's the best application and comfortable to use and easy.	M Saber	##########			0	ar	us		5	ar	masha allah best application comfortable use easy	Positive	0	0	0
Google Play Store	43da7576-96e8-43d3-9c89-ae60e55d56d5	Now, the application has become excellent, but why does it say that I am using VPN when I am connected to Wi-Fi, even though I am not using it and it is turned off on the device as well.	Hamdan Alamri	##########			0	ar	us		5	ar	application become excellent say use vpn connect wifi even though use turn device well	Neutral	1	0	0
Google Play Store	962ec7cf-9adb-4227-9007-a777765e47da	"Well, what do you want me to say about your terrible program? It feels like I'm in the Stone Age. Anything simple or trivial requires me to go to the bank or use the self-service machine just to change my name on the card so I can order it and receive it. The recharge options are limited and I can't even add a recharge option from the Stone Age. I am extremely, extremely, extremely, extremely, e…	Hi Jk	##########			0	ar	us		1	ar	well want say terrible program feel like im stone age anything simple trivial require go bank use selfservice machine change name card order receive recharge options limit cant even add recharge option stone age extremely extremely extremely extremely extremely disappoint service may god help us	Negative	1	1	0
Google Play Store	11c862db-c42f-4ad2-8ea8-75db688cf4ec	Very nice	Abadi2020 Anadi2020	##########			0	ar	us		5	ar	nice	Positive	0	0	0
Google Play Store	884b2c0a-f957-4efc-a097-c06dda7a5f60	Very excellent, it has been done.	عواد القعيد	##########			0	ar	us		5	ar	excellent do	Positive	0	0	0
Google Play Store	73d77dce-c444-4ee2-b842-4430bd6e1f21	Excellent application	ابوعبدالله الانصاري	##########			0	ar	us		5	ar	excellent application	Positive	0	0	0
Google Play Store	1d045c89-f808-48a6-802e-7c4e481c08c8	Good.	احمد شحوت	##########			0	ar	us		5	ar	good	Positive	0	0	0
Google Play Store	1d321d7b-f27c-4450-a9e1-c218f6b82680	Excellent	حسين احمد	##########			0	ar	us		5	ar	excellent	Positive	0	0	0
Google Play Store	e35924ec-3289-49ae-937c-f250a5dcd7bd	Excellent	علاءالدين الطنطاوى	##########			0	ar	us		5	ar	excellent	Positive	0	0	0
Google Play Store	ff54d97a-a828-4bc3-be85-a349055e9f71	More than wonderful.	ELraih Mosco	##########			0	ar	us		5	ar	wonderful	Positive	0	0	0
Google Play Store	fe06132d-605d-444e-bc88-8f0034922899	Excellent very	ابواحمد الزهراني	##########			0	ar	us		5	ar	excellent	Positive	0	0	0
Google Play Store	df3fbce9-5216-4be9-ae7b-8d097f3a6432	Wonderful	MEDᎾ Z	##########			0	ar	us		5	ar	wonderful	Positive	0	0	0
Google Play Store	49537d91-1275-4c04-8f8c-9a4beb5ceeda	I want to transfer to Yemen so that I can return within trading hours. Please provide assistance.	عمر باكردس	##########			0	ar	us		1	ar	want transfer yemen return within trade hours please provide assistance	Neutral	0	1	0
[truncated: 21,473 more rows]
