# Supplementary material for: Retrieval-augmented generation analysis of user reviews in Saudi mobile banking apps: a comparative user experience study of iOS and Android
Source: PeerJ journal article supplement (doi:10.7717/peerj-cs.3565), 2026-02-06
Supplement: Android.zip [file alinma_final.xlsx]

## Sheet: Sheet 1 - alinma_final
alinma_final
source	review_id	review_description	user_name	review_date	developer_response	developer_response_date	thumbs_up	language_code	country_code	app_version	rating	en	cleaned_reviews	Sentiment	Satisfaction	Effectiveness	Efficiency
Google Play Store	9c9cf74a-e8fc-49a3-8666-9e44976b1acc	What backwardness is this?! You want to force me to download the new application and you're not even sure if it works. On top of that, I have to enter the website and authenticate the devices, but still, it doesn't get authenticated. I find myself unable to access neither the website nor the application just to check my account!! Seriously, such a level of backwardness.	Moon almoh	##########			0	en	us		1	ar	backwardness want force download new application youre even sure work top enter website authenticate devices still doesnt get authenticate find unable access neither website application check account seriously level backwardness	Negative	1	1	0
Google Play Store	3e34227e-ea5b-4047-a52a-8769a589e1ab	The website keeps logging me out every time I try to log in.	Adel Alnaser	##########			0	en	us		2	ar	website keep log every time try log	Negative	0	1	0
Google Play Store	095c8479-3c33-4641-8b9f-8d44c65f6eb1	I cannot access since the day of the update. I transferred all my data to Al Rajhi Bank, and God willing, I will not need you anymore, Bank Alinma.	Mr.F	##########			0	en	us		1	ar	access since day update transfer data al rajhi bank god will need anymore bank alinma	Negative	0	1	0
Google Play Store	1a12c441-0da4-444a-b2de-e95b64b98f81	Very slow and it shuts down by itself and not all accounts appear.	Ahmed Khalil	##########			0	en	us		1	ar	slow shut account appear	Negative	0	0	1
Google Play Store	70fd6816-ae0c-48e1-82ac-0aba405d08b0	The new application is not working for us. I have been unable to access my bank account for a week. Even the branch couldn't assist me, and the customer service phone line raised a maintenance request for me, but I haven't received any response for a week. I used to love your old application; it was very easy to use. But this week, you've turned my life upside down. 👎	Ms. Hope	##########			0	en	us		2	ar	new application work us unable access bank account week even branch couldnt assist customer service phone line raise maintenance request havent receive response week use love old application easy use week youve turn life upside	Negative	0	1	0
Google Play Store	5e81e1d0-221a-4f6e-8026-36e68881ef75	The application will be deleted if the bank does not respect its customers, and I will close my bank account.	Abdullah Al-zhrani	##########			0	en	us		1	ar	application delete bank respect customers close bank account	Negative	1	1	0
Google Play Store	b5e4c589-0813-4ed6-b6e7-3406c2ea754b	This application was one of the best applications until the update that ruined everything and made us hate it.	Hamada Atia	##########			0	en	us		1	ar	application one best applications update ruin everything make us hate	Negative	1	0	0
Google Play Store	b9881f75-8ec0-4e98-8b1d-da9c6015525d	Now I urgently need to pay money to a government entity, and if I don't pay by the end of the day, there will be a problem. The application and even entering from the computer say that they need to call the number, and there is no call from you. Please fix these problems because it is not fair for me to sit for two hours and not be able to pay 200 riyals.	marwa said	##########			2	en	us		1	ar	urgently need pay money government entity dont pay end day problem application even enter computer say need call number call please fix problems fair sit two hours able pay riyals	Negative	0	1	0
Google Play Store	0af1f951-5964-4783-95b1-46f448703c8a	The old application is better. It's an issue that you can't transfer a sum of money until 24 hours after activating the device. This is technologically primitive. There are too many error messages. The application is slower than the old one.	KBW Studio	##########			0	en	us		1	ar	old application good issue cant transfer sum money hours activate device technologically primitive many error message application slow old one	Negative	1	1	1
Google Play Store	b994d30c-e597-4eb7-b8dc-0aa56ed9df8d	You have to download the application whether you like it or not. It is a bad user experience. I have an urgent situation to transfer money between my accounts, but unfortunately, it forced me to download the new application and prevented me from transferring between my accounts. It showed me an error message that I have to wait for 24 hours after adding the device. Do you think this is reliable o…	Amer , Ajamaeen	2023-09-09 07:56:00			1	en	us		1	ar	download application whether like bad user experience urgent situation transfer money account unfortunately force download new application prevent transfer account show error message wait hours add device think reliable trustworthy bank	Negative	1	1	0
Google Play Store	f85d6754-1750-4bfd-99d9-92725f5947f5	When attempting to log in, a circle appears and then disappears without the OTP page showing up. Only the login interface remains and the circle disappears.	Neihi Jotaro	##########			0	en	us		4	ar	attempt log circle appear disappear without otp page show login interface remain circle disappear	Neutral	0	1	0
Google Play Store	4c463f83-7167-4d60-b140-b039e974a236	The machine has been broken for many days, specifically since Thursday in Abha. There is nothing good about it.	Muhammed Rashid. KP	##########			0	en	us		2	ar	machine break many days specifically since thursday abha nothing good	Negative	0	1	0
Google Play Store	00c145d9-d4da-4628-9af8-0abd0aab65ae	The application is very slow and very bad.	Mohamed Abdel Raouf	##########			0	en	us		1	ar	application slow bad	Negative	1	0	1
Google Play Store	a43740aa-6a2c-47f3-8dcf-1dd4d13d655f	The only application that prevents you from taking a screenshot, the reason? Protecting you from... I don't know!!	Cure Cure	##########			0	en	us		1	ar	application prevent take screenshot reason protect dont know	Negative	1	1	1
Google Play Store	d7c52a0e-ba59-42ef-8faf-8940946bc68a	Slow and laggy	‫ابو فهد (صلوا على رسول الله)‬‎	##########			0	en	us		1	ar	slow laggy	Negative	0	0	1
Google Play Store	d29b2bfc-0248-42f1-860d-6576c95b2a0c	What's the point of asking for the location, it's very annoying.	Mohammad Aljammaz	##########			0	en	us		1	ar	whats point ask location annoy	Negative	1	0	0
Google Play Store	6ee851f5-e1ea-46aa-a7f1-db3fd297213d	Not possible to use 👎	GAMES & TROPHIES	##########			0	en	us		1	ar	possible use	Negative	0	1	0
Google Play Store	65dc14e3-e468-4050-b207-3f0de9bc25bf	The program is not working.	Meshal	##########			1	en	us		1	ar	program work	Negative	0	1	0
Google Play Store	48c40cb4-deb9-440d-a973-52fc6c75ac57	I have a problem with fast login. I complete all the steps correctly, but when I try to log in fast, I receive an automated response saying that the login information is incorrect, despite ensuring the accuracy of the information, whether it is the fast login password or fingerprint.	Hossam Helmy official	##########			0	en	us		2	ar	problem fast login complete step correctly try log fast receive automate response say login information incorrect despite ensure accuracy information whether fast login password fingerprint	Negative	0	1	0
Google Play Store	b29378f8-b2ed-434b-bb63-1ee1fa3772e9	What's happening with this application, every day there is a different issue. It started with my bills disappearing and ended with not receiving the verification code.	Abdullah Alkhammash	##########			8	en	us		1	ar	whats happen application every day different issue start bill disappear end receive verification code	Negative	0	1	0
Google Play Store	6e0a0896-00f7-4d9c-b5cd-a75e7c3342ee	The application is not working and the website is also not working.	Umar Elyas	##########			1	en	us		1	ar	application work website also work	Negative	0	1	0
Google Play Store	8db1ed52-d41f-40dc-8674-0274fa127b75	for God's sake, wait for the password and sit for a year thinking that it will be sent before the deadline for accepting the password expires, and then we can try again and sit for another year and it ends like that and we fail to enter, you know?	Areej .q	##########			4	en	us		2	ar	gods sake wait password sit year think send deadline accept password expire try sit another year end like fail enter know	Negative	0	0	0
Google Play Store	cab3700f-e63a-42b6-9851-737782ec44f9	What opens	Mughram ghamdi	##########			2	en	us		1	ar	open	Neutral	0	1	0
Google Play Store	81d9fbd7-3f4a-4a8f-be70-ee0c0bdee940	The confirmation code call takes more than two minutes.	A.oobex	##########			1	en	us		1	ar	confirmation code call take two minutes	Negative	0	0	1
Google Play Store	2b166950-dc9b-48f9-8ec4-482f6b742742	Very bad after the update and slow.	M7MD HAT	##########			1	en	us		1	ar	bad update slow	Negative	1	0	1
Google Play Store	744ffd9c-9060-4d2c-b9f1-6f73a8043321	Unfortunately bad.	Abu Raed	##########			1	en	us		1	ar	unfortunately bad	Negative	1	0	0
Google Play Store	13fd5683-a716-458f-b8d1-45fe50e484ce	"An application that forces you to open GPS to use it, and if you don't open it, it doesn't work with you, is a violation of user rights and an explicit trespassing."	BAmKA	##########			1	en	us		1	ar	application force open gps use dont open doesnt work violation user right explicit trespass	Negative	0	1	0
Google Play Store	345c7b44-1bcd-4d5b-96c9-38a97441b4ac	He was nice to me, but suddenly I couldn't open the application at all, even though my phone is working fine with all the other applications.	Hossam AL Ghamdi	##########			2	en	us		1	ar	nice suddenly couldnt open application even though phone work fine applications	Neutral	0	1	0
Google Play Store	0071bef2-9f7c-4cf7-8108-d68e54d6aa6f	I want to see the payment record to make sure of purchases and the months. Every time I try to see, it tells me there are no engines? What's the point of the application other than the transfer if it won't open to show me everything?	Hnoody292	##########			1	en	us		1	ar	want see payment record make sure purchase months every time try see tell engines whats point application transfer wont open show everything	Negative	0	1	0
Google Play Store	8e6bb261-434f-4048-b4af-593c97a2a7ed	Failed application hanging	Saleh Mohsen	##########			1	en	us		1	ar	fail application hang	Negative	0	1	1
Google Play Store	ec294a40-7abe-48f7-93dc-00660389e29c	"The website needs to be activated upon login."	Yousef R	##########			1	en	us		1	ar	website need activate upon login	Neutral	1	1	0
Google Play Store	3accd4fe-4454-4253-a119-b720370329c8	His problems are many.. He's not reliable..	ريان العي	##########			1	en	us		1	ar	problems many hes reliable	Negative	0	1	0
Google Play Store	d7f45181-4ac8-4bb0-b306-7f4574d8ccf5	Garbage and it is not suitable to be a delivery application.	NO NAME	##########			0	en	us		1	ar	garbage suitable delivery application	Negative	1	0	0
Google Play Store	64e803aa-5502-4c1c-947f-b05fe82b5a6e	The application is extremely slow after the update and sometimes doesn't work.	Asmd Aldawsari	##########			1	en	us		1	ar	application extremely slow update sometimes doesnt work	Negative	0	1	1
Google Play Store	f0d9babc-9551-4eeb-b284-f6604349d26c	It is full of problems, and it keeps breaking down all the time.	Fahad Yasser	##########			0	en	us		2	ar	full problems keep break time	Negative	0	1	1
Google Play Store	2c55a8fc-454e-4749-9758-061bdcd3cc02	Until yesterday, it used to work with data, but now there must be a Wi-Fi network or else the application won't open. It is unreasonable that I have to have a Wi-Fi network to open the application, especially when I am outside the house. Please make the necessary adjustments to the application in this regard.	AbdulRhman BinGhanem	##########			0	en	us		3	ar	yesterday use work data must wifi network else application wont open unreasonable wifi network open application especially outside house please make necessary adjustments application regard	Negative	0	1	0
Google Play Store	50457239-7171-4ed2-8002-299817339ade	Unfortunately, the application does not serve users at all. Every time we enter the account, it takes us back to the login page. This problem has been going on for a long time and has not been resolved.	Yasser Ali	##########			1	en	us		1	ar	unfortunately application serve users every time enter account take us back login page problem go long time resolve	Negative	1	0	0
Google Play Store	d5ac28d4-d65c-43ea-8d03-f0b643aa139e	The new update is not working properly, it keeps asking for a location with every login and the quick login requires a password.	ANAS ALHARBI	##########			1	en	us		1	ar	new update work properly keep ask location every login quick login require password	Negative	0	1	0
Google Play Store	90c279e3-0914-48bf-8cb4-9495c6963c9a	Very good, comfortable, and very fast. They continuously develop their channels and constantly update and fix problems.	sharger Ni	##########			0	en	us		5	ar	good comfortable fast continuously develop channel constantly update fix problems	Positive	0	0	0
Google Play Store	753cafd1-5e98-453d-8a1b-068268de6081	The worst application, the worst services, and the worst bank.	O E	##########			1	en	us		1	ar	bad application bad service bad bank	Negative	1	0	0
Google Play Store	add24098-f829-4c93-a443-678ef651dbb9	One of the worst banks in the kingdom, their application is a failure and their management does not know how to deal with customer issues. I do not recommend it.	Suliman Al-Romi	##########			1	en	us		1	ar	one bad bank kingdom application failure management know deal customer issue recommend	Negative	1	0	0
Google Play Store	a230b8f0-b362-4016-921a-ca47ce93e2ac	Alhamdulillah.	MOHAMMED FORID	##########			0	en	us		5	ar	alhamdulillah	Positive	1	0	0
Google Play Store	d7b8e7ea-74ca-476a-9efe-910875412818	Every time I try to create an account, it says to complete the national address. My national address is complete, but the website doesn't understand my situation.	Sagad	##########			0	en	us		3	ar	every time try create account say complete national address national address complete website doesnt understand situation	Negative	0	1	0
Google Play Store	6a63ff37-2749-4ff2-a212-d56c25611f09	Quick entry is not accepted even though it has been activated multiple times, and each time it gives an incorrect code message. Even fingerprint entry is also canceled, despite being activated multiple times. Frankly, the application has become annoying.	Abuomar	##########			0	en	us		3	ar	quick entry accept even though activate multiple time time give incorrect code message even fingerprint entry also cancel despite activate multiple time frankly application become annoy	Negative	1	1	0
Google Play Store	48a1ab26-6710-45c1-8b58-53a8d3457ce5	bad Application	Modi Show	##########			0	en	us		1	ar	bad application	Negative	1	0	0
Google Play Store	797aa1df-3ede-4613-8b64-75ce10b07de5	Very bad, it hangs and asks for location permissions.	khalid Al-Shetwi	##########			0	en	us		1	ar	bad hang ask location permissions	Negative	1	0	1
Google Play Store	92ad3086-38a5-4c9e-85af-c4af98a70102	He doesn't work, he just wanders around.	abo khalid	##########			0	en	us		1	ar	doesnt work wander around	Negative	0	1	0
Google Play Store	633f9571-bd38-4410-8144-49edda12a65d	Keep crushing while using the worst version ever, which is bad and doesn't work.	arwa nasser	##########			1	en	us		1	ar	keep crush use bad version ever bad doesnt work	Negative	1	1	0
Google Play Store	b56e6a73-0917-411e-8e7e-177eac92bbf0	What do you want from this site?????????? The star so that I can rate it, or even you don't deserve it.	Osama O	##########			0	en	us		1	ar	want site star rate even dont deserve	Negative	1	0	0
Google Play Store	2019136f-2cf2-43ee-b9f5-1bc7de4d7e2d	Very bad	Saud AZ	##########			0	en	us		1	ar	bad	Negative	1	0	0
Google Play Store	ea192102-c514-4013-bd59-3ee1176ef50d	Excellent, fantastic, honestly it's better than Al Rajhi.	Miraz Ansari	##########			0	en	us		5	ar	excellent fantastic honestly good al rajhi	Positive	0	0	0
Google Play Store	d49c395a-cbba-4447-96da-69f90cc645fd	The application is not working.	Saed Zar	##########			0	en	us		1	ar	application work	Negative	0	1	0
Google Play Store	ee10e5d8-7304-42f7-8e0d-82c7417721c9	Why do you need my website to open my account?	vezga san	##########			1	en	us		1	ar	need website open account	Negative	0	1	0
Google Play Store	a04c0796-23a2-4e12-938f-4904d4e42430	Rotten	Bilal Hasan	##########			1	en	us		1	ar	rotten	Negative	1	0	0
Google Play Store	8f21426d-35d3-4cbf-95ba-b596cb042582	You must enable GPS to open the program.. The evaluation was done with grace.	Ibrahim Mohd	##########			1	en	us		1	ar	must enable gps open program evaluation do grace	Neutral	0	1	0
Google Play Store	381d57bd-3e43-4fad-a149-43706789d82b	Difficulty browsing slow performance	Sulaiman Al-Fayez	##########			0	en	us		2	ar	difficulty browse slow performance	Negative	0	0	1
Google Play Store	1e0c9b32-77e5-47b6-8acf-7d410c810085	Your deposit service through the ATMs is the worst service possible. Thirty percent of the time, the service is "temporarily unavailable."	Dr Median Median	##########			0	en	us		1	ar	deposit service atms bad service possible thirty percent time service temporarily unavailable	Negative	1	1	0
Google Play Store	0e1ff47e-899f-45a2-b964-46d2542ab9cc	Very bad bank, no services and nothing.	ahmad albargi	##########			1	en	us		1	ar	bad bank service nothing	Negative	1	0	0
Google Play Store	b6a7ab0d-04c8-4d96-8986-c25a8c35f34c	The program does not work until the location is specified!	Bader Alluhaidah	##########			1	en	us		1	ar	program work location specify	Negative	0	1	0
Google Play Store	b0864988-0678-456b-926d-3627130f9d21	May God not grant you success in this failed application and the failed electronic services that embarrass me every time I make a payment, not to mention the fear of location tracking every time I log in. I will find another bank for myself.	wize wisdom	##########			1	en	us		1	ar	may god grant success fail application fail electronic service embarrass every time make payment mention fear location track every time log find another bank	Negative	1	1	0
Google Play Store	3a3969cd-eca2-402e-9ae3-9a3ae673602d	He requests access to my website. When denied, entry to the accounts is not allowed. Spyware.	Abdullah Alyousef	##########			0	en	us		1	ar	request access website deny entry account allow spyware	Negative	0	1	0
Google Play Store	febc4f2a-6274-4572-9071-ecc437df6c8c	You need to activate the website to open the application! It is a clear violation of privacy!	Khaled Almisnid	##########			3	en	us		1	ar	need activate website open application clear violation privacy	Negative	1	1	0
Google Play Store	f76a334a-b99c-475f-8c85-d21c247067f6	The bank's application has become espionage, trying to access the website of its beneficiaries and monitor their movements. I will publish this matter, God willing, as news on the level of digital security and mention you as an example. Do not compare yourselves to financial applications like STC or YourPay. We deal with a banking entity that has branches and a presence. Al Rajhi was like you, de…	Majed Alsaif	##########			1	en	us		1	ar	bank application become espionage try access website beneficiaries monitor movements publish matter god will news level digital security mention example compare financial applications like stc yourpay deal bank entity branch presence al rajhi like demand website contact remove mandatory website activation feature	Negative	1	1	0
Google Play Store	f4efb8ad-58e5-4a10-baf2-1215b5e6bffb	They are not entitled to request GPS location permission.	ahmad qaseer	##########			2	en	us		1	ar	entitle request gps location permission	Neutral	0	1	0
Google Play Store	91a59c44-687d-4ee4-8f85-5bea27414980	It's becoming like shit.. The login has become slow and there is no option to charge mobile credit.	Mansoor	##########			4	en	us		1	ar	become like shit login become slow option charge mobile credit	Negative	1	0	1
Google Play Store	30798afb-9620-4b78-a4bf-1b479f71829e	"It requires accessing the location of its users in order to allow them to use the app, this is not acceptable from a banking app."	Dev Al	##########			2	en	us		1	ar	require access location users order allow use app acceptable bank app	Negative	1	0	0
Google Play Store	90ddb348-f32e-4028-b160-3ee865b40c56	Bad, during login the activation message does not arrive, also when adding a trusted device it does not accept the addition. The application only works when adding the location!	Abdullah Aljulayfi	##########			0	en	us		1	ar	bad login activation message arrive also add trust device accept addition application work add location	Negative	1	1	0
Google Play Store	5832cab7-16e8-4400-b699-81dbc63bf706	The worst application and the worst bank you could ever encounter in your life, with terrible service and scammers.	Mr.heshamafandi	##########			0	en	us		1	ar	bad application bad bank could ever encounter life terrible service scammers	Negative	1	0	0
Google Play Store	170cd2aa-5cc9-4f84-bfa6-292010c920bc	You have to enable the location for it to work.	Ali Salmeen	##########			1	en	us		1	ar	enable location work	Neutral	0	1	0
Google Play Store	fabe1f90-8378-4b04-bc14-8e10e943f399	Poor service, sometimes I need the code as soon as possible and it doesn't come.. I will definitely change the bank 100%.	Ahmed Atta	##########			1	en	us		1	ar	poor service sometimes need code soon possible doesnt come definitely change bank	Negative	1	1	0
Google Play Store	2b16691f-73ec-4fb8-a38c-44740f562e1a	The application is not the best compared to other banks, but it was functional until the time I needed it after I lost my card and wanted to suspend it until I found it or replaced it. It did not allow me to perform this important service and told me to try again later. After that, it did not even display my card statements.	Hassan Albahrani	##########			0	en	us		2	ar	application best compare bank functional time need lose card want suspend find replace allow perform important service tell try late even display card statements	Negative	1	1	1
Google Play Store	759c94af-7e69-4f95-978d-47cc6708e252	In complete improvement and needs monitoring and development. Better improvement than before, good luck 👍	Raffaa Khalid	##########			1	en	us		4	ar	complete improvement need monitor development good improvement good luck	Positive	0	0	0
Google Play Store	46d30577-2054-45b8-8d04-2b5e68d3d078	The application was practical and without problems. The latest update is outdated, it forces you to enable GPS navigation service or it will close!! Is it a navigation program or a spy program? It's strange. Also, the quick login feature is not working, despite activating it three times with the fingerprint, but the program does not save the quick login information. In short, the application has …	AbdurRahman M. Sultan	2023-02-05 02:53:00			3	en	us		1	ar	application practical without problems late update outdated force enable gps navigation service close navigation program spy program strange also quick login feature work despite activate three time fingerprint program save quick login information short application become failure like service account open rest service bad reflect backwardness policies	Negative	1	1	0
Google Play Store	02daa6d9-99f8-4a01-9a53-0535628b216b	No one can force you to access your website all the time, I don't know what their business is.	Anas Nemer	##########			3	en	us		1	ar	one force access website time dont know business	Negative	1	0	0
Google Play Store	9138313a-654c-4d7a-8ffa-00764e47080b	After the new update, accessing the website became mandatory..!!! And when hiding the balance, all recent transactions are also hidden!! This bank is evolving slowly, while competitors have already surpassed them.. And the most difficult transfer process is through the Enmaa application. A verification code is required for transfers, and the auto-fill feature is not available, so you have to ente…	Abdulrahman Alyahya	##########			1	en	us		1	ar	new update access website become mandatory hide balance recent transactions also hide bank evolve slowly competitors already surpass difficult transfer process enmaa application verification code require transfer autofill feature available enter code manually furthermore one code sufficient entire session enter verification code every transfer separately additionally transaction specify account r…	Negative	1	1	0
Google Play Store	5f5ce4c9-d79e-4c43-a5b2-34a935cd2aa1	You have to ruin everything, it was working and now after the update we can't log in anymore, what's wrong with the website?!	x 7	##########			2	en	us		1	ar	ruin everything work update cant log anymore whats wrong website	Negative	0	1	0
Google Play Store	08273c71-8627-4fb4-88a3-42ffe85085c4	It is not possible to open an account through the application.	RAED ALMUZAINI	2023-02-02 08:45:00			0	en	us		1	ar	possible open account application	Negative	0	1	0
Google Play Store	de57bfc7-8f18-4e3c-a5e1-58ab6204317f	If there were fewer than one star, I would give you an incredibly slow application that does not accept transfers and keeps loading without stopping. When we call, you say we should file a complaint and the complaint number will be provided, but no one calls us or responds to us. Then, after three days, I receive a message saying that the problem has been resolved, but it is still there. God will…	Mohammad El Ratel	##########			1	en	us		1	ar	few one star would give incredibly slow application accept transfer keep load without stop call say file complaint complaint number provide one call us respond us three days receive message say problem resolve still god will file official complaint exhaust us	Negative	0	1	1
Google Play Store	5702cf29-2e5e-4725-bbea-7ed25cf7f16c	Is it difficult for you to allow login without a mobile connection? Is it difficult for me to press reject and it keeps ringing forcibly? Let the Indian guy you give 30,000 a month to move and I won't come and program the application for you?	عبدالرحمن الفيفي	##########			2	en	us		1	ar	difficult allow login without mobile connection difficult press reject keep ring forcibly let indian guy give month move wont come program application	Negative	1	1	0
Google Play Store	0edfb605-eead-40a0-b73d-8521532b268a	After the latest update, a few things got messed up.	otaku_th9	##########			0	en	us		4	ar	late update things get mess	Negative	1	0	0
Google Play Store	5d93f616-9739-413a-9977-983e2b1ce863	I cannot access my account with the new update. You guys are not responding.	Sweeney Todd	##########			0	en	us		1	ar	access account new update guy respond	Negative	0	1	0
Google Play Store	9e4a6667-aff3-4433-b490-e9a11aaa25bd	"The application does not accept Arabic in the transfer memo, which is strange. It should only accept Arabic. Are the users of the application foreigners?!!!"	Bandar ALSaleem	##########			0	en	us		1	ar	application accept arabic transfer memo strange accept arabic users application foreigners	Negative	0	1	0
Google Play Store	1792b888-07e5-4a79-9032-b2d793814c73	The liver slows down. They don't respond to emails to improve their application.	Variation	##########			0	en	us		1	ar	liver slow dont respond email improve application	Negative	0	0	1
Google Play Store	b352c0b2-3b32-4689-b3c0-5adbcf2ae8e2	I cannot claim that the device is not registered with the bank. When entering the requested number in the automated call system (if they call), the application does not open. I have been suffering for 5 months.	Hani Gazzaz	2023-01-06 06:18:00			1	en	us		1	ar	claim device register bank enter request number automate call system call application open suffer months	Negative	0	1	0
Google Play Store	87efbff8-090a-4288-866d-c6611f86e7d6	It has become difficult to write in Arabic in the memo concerning the old conversion update, and we kindly request you to fix this issue.	Dr Mohem Almashhour	2023-01-02 05:30:00			0	en	us		1	ar	become difficult write arabic memo concern old conversion update kindly request fix issue	Negative	1	1	0
Google Play Store	a8c29fec-3bca-4418-8a46-754dfc6c32f7	The purpose of the transfer is not written in Arabic / It logs me out of the application when I try to share the transfer operation.. Unfortunately, the application's performance is constantly decreasing.	arwa hash	##########			0	en	us		1	ar	purpose transfer write arabic log application try share transfer operation unfortunately applications performance constantly decrease	Negative	1	1	0
Google Play Store	002f09c4-1dc0-47d1-a25a-65a80d311552	The application does not display any of the transactions that occurred in the account, whether it was purchasing from point of sale or settling bills.	Samar Alkhamees	##########			0	en	us		1	ar	application display transactions occur account whether purchase point sale settle bill	Neutral	0	1	0
Google Play Store	1c6a3a51-7a19-49db-ab32-e1785535a254	Bad	Sam Ali	##########			0	en	us		1	ar	bad	Neutral	1	0	0
Google Play Store	f05ed008-a84e-4046-8615-0102307826cf	You can't withdraw the money that was transferred from your account.	maaa	##########			0	en	us		1	ar	cant withdraw money transfer account	Neutral	0	1	0
Google Play Store	ef33eeac-1d10-4568-8bdf-a79ab0fc339a	The application does not work for me. It always asks for the registered device, which you have, and it has my mobile number from ten years ago. I follow the steps and receive a call to enter the required number, but nothing works. I have uninstalled the application several times and reinstalled it, but it still does not work. I have sent two emails and a complaint through the survey. How can I so…	Adnan Komaiha	##########			0	en	us		1	ar	application work always ask register device mobile number ten years ago follow step receive call enter require number nothing work uninstalled application several time reinstall still work send two email complaint survey solve problem know outside kingdom	Negative	0	1	0
Google Play Store	afc66739-2f03-4911-8fa4-616d49b0ece6	The bank where I was cheated the most is the one. I applied for a personal loan and according to the employee, he told me that I could get one year and five months. After I did everything, I opened an account, transferred my salary to the bank, and provided a salary certificate and everything. It turned out in the end that I did not qualify according to the bank's conditions.	محمد ابراهيم	##########			0	en	us		1	ar	bank cheat one apply personal loan accord employee tell could get one year five months everything open account transfer salary bank provide salary certificate everything turn end qualify accord bank condition	Negative	1	1	0
Google Play Store	e883055a-17b2-4a20-a32e-82a6b9c3e936	The dumbest app for the dumbest bank.	azzam alsuhaibani	##########			1	en	us		1	ar	dumb app dumb bank	Negative	1	0	0
Google Play Store	77669863-20e1-4802-9f27-e554b0cc177d	I cannot save the operations and transactions. The application exits me immediately. Please fix the problem.	Almohanad Alzooaabe	##########			1	en	us		1	ar	save operations transactions application exit immediately please fix problem	Negative	0	1	0
Google Play Store	2d5b3fca-87c6-426a-8684-d99444ec9609	There is a problem with the application, we are unable to share the receipt of transfer operations, it suddenly exits the application.	Mohammed Eidoh	##########			1	en	us		2	ar	problem application unable share receipt transfer operations suddenly exit application	Negative	0	1	0
Google Play Store	af7e527f-e823-41b3-92d0-c0d5ecc7afe2	The same problem related to the VPN outside the kingdom, you can't log in.	mahmoud abu al amrin	##########			0	en	us		1	ar	problem relate vpn outside kingdom cant log	Negative	0	1	0
Google Play Store	e3cffe13-928a-4ae2-b85c-347e0f702485	It has been more than two weeks broken.	Azooz Bander	##########			1	en	us		1	ar	two weeks break	Negative	0	0	0
Google Play Store	47a0adf9-50ab-4fd5-93aa-1bcd72b20e68	The program crashes constantly, especially when sharing images of bank transfers. It has crashed over 5 times, which frustrates me. If there was an option to give it less than one star, I would.	FARIS ALZAHRANI	##########			2	en	us		1	ar	program crash constantly especially share image bank transfer crash time frustrate option give less one star would	Negative	1	1	1
Google Play Store	5e9882f6-e847-4dcf-b8c8-5e97ab056ccc	The latest update does not work properly for us. It has been two days now and unfortunately, the C update and C application are not functioning.	azooz BoHaneen	##########			1	en	us		1	ar	late update work properly us two days unfortunately c update c application function	Negative	0	1	0
Google Play Store	4f129abb-bc75-41e8-856d-1841b94e71d8	The application does not work.	様バッグ	##########			1	en	us		1	ar	application work	Negative	0	1	0
Google Play Store	2cc8ed51-e6ce-4640-8f50-d28059adf214	After updating the program, the beneficiary's name field disappeared when adding a new beneficiary. If we press the continue button, an error message appears alerting us to the need to add a new beneficiary. Please correct the error. When I selected that I am not satisfied with the program, the password code stopped sending to the mobile. Please fix the program quickly.	N Garoot	##########			1	en	us		1	ar	update program beneficiarys name field disappear add new beneficiary press continue button error message appear alert us need add new beneficiary please correct error select satisfy program password code stop send mobile please fix program quickly	Negative	0	1	0
Google Play Store	042bc5c4-8f76-483e-8b90-f9e22113441a	The application is malfunctioning after the update.	abcfjfjfjfj	##########			1	en	us		1	ar	application malfunction update	Negative	0	1	0
Google Play Store	ca4fba19-a39c-425e-bdcb-2f827af2d419	The latest update is not functional, please fix the program.	iNamankani	##########			1	en	us		5	ar	late update functional please fix program	Negative	0	1	0
Google Play Store	dce31ada-8b39-4123-99cb-1e90e9111be0	The application crashed.	Abode M.f	##########			0	en	us		1	ar	application crash	Negative	0	1	0
Google Play Store	a90d604e-6516-4c98-8324-014046a64a3b	The latest update error has been fixed in less than 24 hours. Thank you.	AbuSaud Yaser	##########			0	en	us		5	ar	late update error fix less hours thank	Positive	0	1	0
Google Play Store	0209cbf3-58e9-44b6-85be-244c52eb21c2	The latest update is terrible, even the phone gives a notification saying it's damaged.	Abdulaziz Mahmoud	##########			1	en	us		1	ar	late update terrible even phone give notification say damage	Negative	1	1	0
Google Play Store	27b71d6d-0af2-463e-b2dd-ed082400c1c8	The application is not working, what is the reason?	mugeebalrahman hassan	##########			0	en	us		1	ar	application work reason	Negative	0	1	0
Google Play Store	51a51f32-70aa-4141-b804-1375e45952d8	The latest version does not work at all, unfortunately. A message appears saying: "This app has a bug."	ak aks	##########			0	en	us		1	ar	late version work unfortunately message appear say app bug	Negative	0	1	0
Google Play Store	7dd0e20f-cb67-47fb-bfcc-2b05e44a9965	The new update doesn't open the app!	Frying pan Panlon	##########			1	en	us		1	ar	new update doesnt open app	Negative	0	1	0
Google Play Store	c8707305-3bb5-4cce-8e66-d24c499ac59c	After the update, the application doesn't open on my Xiaomi Poco F4 mobile.	Abd Mo	##########			1	en	us		3	ar	update application doesnt open xiaomi poco f mobile	Negative	0	1	0
Google Play Store	45a24a89-9b66-448b-b1e3-1c34baaa6eb4	The application keeps logging me out, and I'm sure there's nothing wrong with my phone. Please find a solution for us, please.	Itz Rixer	##########			0	en	us		3	ar	application keep log im sure theres nothing wrong phone please find solution us please	Negative	0	1	0
Google Play Store	f1337c11-da12-4398-ba91-90be4c713508	After the latest update, the application does not work at all. Mobile version: Android 13, One UI 5.0, Samsung Galaxy Z Flip 3 (SM-F711B). We are waiting for the fix :)	Jafar Alessa	##########			0	en	us		3	ar	late update application work mobile version android one ui samsung galaxy z flip smfb wait fix	Negative	0	1	0
Google Play Store	bb6b3c65-3504-4593-bbc0-b9218a35d907	Difficult to use and poor service	نور الرحمن	##########			0	en	us		1	ar	difficult use poor service	Negative	1	0	0
Google Play Store	22247419-b88c-48ef-a2b2-3c1c6726263e	The worst application experience ever, it doesn't even allow account creation and the app has a malfunction.	Mr Mido	##########			0	en	us		1	ar	bad application experience ever doesnt even allow account creation app malfunction	Negative	1	1	0
Google Play Store	2792406f-476a-41cb-8920-1d6c65d5481a	A bad application that violates your privacy forces you to turn off VPN in order to use it, and now you also have to add your phone, which has nothing to do with it.	someone	##########			1	en	us		1	ar	bad application violate privacy force turn vpn order use also add phone nothing	Negative	1	1	0
Google Play Store	ae3359e9-d954-4d8f-9180-7bf0edaca150	There is no possibility for me to use the application because of the new update that requires you to verify your device. Even though I receive a call and give permission, suddenly it kicks me out of the application. Please solve the problem.	Basil Ahmed	##########			4	en	us		1	ar	possibility use application new update require verify device even though receive call give permission suddenly kick application please solve problem	Negative	0	1	0
Google Play Store	4825d0cb-8927-45aa-9642-b03e15d616cd	"The worst and dumbest online service in Saudi banks for a whole year. We cannot access online, may God curse this bank."	Mohammed S	##########			0	en	us		1	ar	bad dumb online service saudi bank whole year access online may god curse bank	Negative	1	0	0
Google Play Store	38d31e0a-7a91-46b1-91e5-490dfa48668a	When I try to enter the application, it says that your device is not registered. If I answer yes, I receive a call. If I answer no, and if I enter all the numbers, it tells me the same result happened in the call. An error occurred.	mosab art	##########			3	en	us		1	ar	try enter application say device register answer yes receive call answer enter number tell result happen call error occur	Negative	0	1	0
Google Play Store	2e4d9b59-b34b-4210-a05e-d70a46dead8b	The application, after today's update, is not letting me access my account. It says that my device is not registered and it asks me to make a call and add it again. I have repeated this process sixty times, but the problem is still there. Please hurry up and find a solution, our matters have become delayed.	Wafa	##########			2	en	us		1	ar	application todays update let access account say device register ask make call add repeat process sixty time problem still please hurry find solution matter become delay	Negative	0	0	1
Google Play Store	a8326d7d-6046-4ee0-8c3a-6db21085e67a	The worst bank that can happen to you is the only one that requires you to pay for termination.	Alaa Abdul-Aziz	##########			0	en	us		1	ar	bad bank happen one require pay termination	Negative	1	0	0
Google Play Store	6f739481-8e86-40ad-87b9-0e2f0eb54a1a	Unfortunately, the bank cannot be relied upon. The Visa card has been inactive all month and withdrawals are being made without any reason.	Sayed mohammad Alali	##########			0	en	us		1	ar	unfortunately bank rely upon visa card inactive month withdrawals make without reason	Negative	1	0	0
Google Play Store	09855a07-c150-4f24-b483-f23661e211e7	The application is smooth, responsive, and free of problems and advertisements.	Nahar Alnahari	##########			0	en	us		4	ar	application smooth responsive free problems advertisements	Positive	1	0	0
Google Play Store	31356874-a439-4ec9-9c3c-ef8824ae2ba4	Dumb application, not smart.	Abood Harkat	##########			0	en	us		1	ar	dumb application smart	Negative	1	0	0
Google Play Store	b9135e30-9798-4ddd-b3fe-3b201e797902	The worst bank charges more than 50 riyals for international transfers on only 1000 riyals.	Mohamed Sobhy	##########			0	en	us		1	ar	bad bank charge riyals international transfer riyals	Negative	1	1	0
Google Play Store	6c76274e-bd5b-43f9-8155-f494461912da	Wonderful 😍	Abo Abdulrahman	2022-09-01 00:53:00			0	en	us		5	ar	wonderful	Positive	0	0	0
Google Play Store	16501901-b86c-409d-948d-87bfac8faa1c	A terrible and disgusting experience, with some extremely annoying points that make me hate using it except when necessary.	Amer Bakeer	##########			0	en	us		1	ar	terrible disgust experience extremely annoy point make hate use except necessary	Negative	1	0	0
Google Play Store	4c49e812-63e2-4133-a246-3e9976d6ae5f	Honestly, normalization has made me feel relieved....We'll see after using it, hopefully, I'll come out better.	HOZAIFA IMRAN	##########			0	en	us		5	ar	honestly normalization make feel relievedwell see use hopefully ill come good	Positive	1	0	0
Google Play Store	c499dbcf-48cb-492f-9446-3991b213489f	If you try to enter through a Xiaomi mobile, it says your device is rooted, even though it was working fine before the update and I didn't root my device.	abdulrahman alsalman	##########			1	en	us		1	ar	try enter xiaomi mobile say device root even though work fine update didnt root device	Neutral	0	1	0
Google Play Store	945ee0d3-c2f6-4c43-b870-8e9c029d689a	"The fingerprint login activation is broken and gives me an error when I try to enable it."	Abdullah Alnasser	##########			0	en	us		1	ar	fingerprint login activation break give error try enable	Negative	0	1	0
Google Play Store	e10d86fd-ed03-43dd-b154-ba6cb12685d1	The best bank overall in terms of customer service and honoring the client.	Me Riyadh	##########			0	en	us		5	ar	best bank overall term customer service honor client	Positive	0	0	0
Google Play Store	b1bdd5a7-b81c-4f1b-87bf-46e7f23625f0	The most beautiful bank with the easiest application and without any complications.	Ahmed abadi	2022-08-08 09:24:00			0	en	us		5	ar	beautiful bank easy application without complications	Positive	1	0	0
Google Play Store	9c2dd0fe-d575-4f34-90d3-f9eac670f812	Bad experience and talking to customer service is even worse.	Samer Hashim	##########			0	en	us		1	ar	bad experience talk customer service even bad	Negative	1	0	0
Google Play Store	05a18333-1d50-4711-8ac9-269a10a7567b	Unclear in detail, difficult compared to Al-Ahli Bank.	Abdullah Aljaber	##########			0	en	us		2	ar	unclear detail difficult compare alahli bank	Negative	1	0	0
Google Play Store	22016121-d27c-4e91-a729-fdb044d57346	Great application and excellent bank to deal with.	Amro Adham	##########			0	en	us		5	ar	great application excellent bank deal	Positive	0	0	0
Google Play Store	7c40b946-5652-4af0-b4de-a972a398c9ae	An excellent and amazing bank in dealing.	Esam Ayoub	##########			0	en	us		5	ar	excellent amaze bank deal	Positive	0	0	0
Google Play Store	da059c34-a1b7-451c-8f22-82fa34e80a45	Thank you for adding the fingerprint.	Salem Alabdulrahim	##########			1	en	us		4	ar	thank add fingerprint	Positive	0	1	0
Google Play Store	3ac89178-2d2a-4ae9-a22f-c9ed95d99845	The application is very stupid and unnecessarily complicated, and the fast conversion is useless. I have contacted them without any benefit. 👎	ابو احمد القحطاني	##########			0	en	us		1	ar	application stupid unnecessarily complicate fast conversion useless contact without benefit	Negative	1	1	0
Google Play Store	98df6e64-44f2-480d-b855-617e6481fe8e	The best bank.	ابوفهد القحطاني	##########			0	en	us		5	ar	best bank	Positive	0	0	0
Google Play Store	1118bdb7-0322-4916-b85a-775fca046209	AlInma....the most reliable of them all.... May Allah bless you all.	Yen Kay	##########			0	en	us		5	ar	alinmathe reliable may allah bless	Positive	1	0	0
Google Play Store	354fa114-7515-4390-abac-cd89f1ba236f	Excellent and easy services. However, the strange thing is that when using fingerprint login, it reverts back and asks for entering the password.	abu hussam	##########			0	en	us		5	ar	excellent easy service however strange thing use fingerprint login revert back ask enter password	Neutral	1	1	0
Google Play Store	f81ca803-44fc-4f80-bfae-ffec64b03f86	Excellent bank, but the worst program with lots of issues.	Hany H	##########			0	en	us		1	ar	excellent bank bad program lot issue	Negative	1	0	0
Google Play Store	f0d5b7ed-bbd8-468a-b82b-03243e1c2338	The most beautiful and best bank.	MOHAMED SALAH	##########			0	en	us		5	ar	beautiful best bank	Positive	0	0	0
Google Play Store	68604d00-fc51-489c-a33a-0dba5cdde1be	The customer service is extremely poor, the transfers are very bad, the currency exchange rate is very bad, solving problems takes a very long time, the bank's response towards problems is extremely cold, they do not appreciate the customer's loss due to their mistakes, I do not feel honored to continue with you.	Ramy Khattab	##########			0	en	us		1	ar	customer service extremely poor transfer bad currency exchange rate bad solve problems take long time bank response towards problems extremely cold appreciate customers loss due mistake feel honor continue	Negative	1	0	1
Google Play Store	0d4ba9a4-0bc9-4e6b-a033-1506046e2e60	The traveler's card information does not appear after entering the password. The problem has been ongoing for more than a month. When attempting to increase the allowed limit for quick transfers, an error occurs and the process is rejected.	Azzam Alburaey	##########			0	en	us		2	ar	travelers card information appear enter password problem ongoing month attempt increase allow limit quick transfer error occur process reject	Negative	0	1	0
Google Play Store	92d87d40-b525-477d-93c1-766de16806ab	Very wonderful/Excellent.	سلطان شلال	##########			0	en	us		5	ar	wonderfulexcellent	Positive	0	0	0
Google Play Store	6fb80a92-a38b-48fc-bdb6-a5914082b7a6	Alinma Bank, my old and new friend.	Mohamed Gaffar Haj	##########			0	en	us		4	ar	alinma bank old new friend	Positive	1	0	0
Google Play Store	7d7a776d-8122-4c90-872a-21f9555c3945	The problem is when requesting to display the data of the cards in the program, a blank page appears.	Hammad H	##########			0	en	us		1	ar	problem request display data card program blank page appear	Negative	0	1	0
Google Play Store	127f1f95-d842-4835-9549-42fb809ceced	Every time I try to transfer, it says there's an error. Try again, for goodness sake, how clever of you to hold onto our money in the account.	Sumayah MQ	##########			0	en	us		1	ar	every time try transfer say theres error try goodness sake clever hold onto money account	Negative	1	1	0
Google Play Store	0902a03e-f057-49d3-b1ba-4b61115e6dd8	Generally speaking, it is one of the best banks. However, regarding the program, there is something unpleasant, which is the account and transfer statements. Unfortunately, they are often confused in a strange way, and you cannot determine the order of the transfers as they are all intertwined. This makes it difficult to know whether you have received a transfer or not. Moreover, SMS notification…	Faisal	##########			0	en	us		1	ar	generally speak one best bank however regard program something unpleasant account transfer statements unfortunately often confuse strange way determine order transfer intertwine make difficult know whether receive transfer moreover sms notifications often delay sometimes dont receive transfer honestly would like see another bank solve problems	Negative	1	1	1
Google Play Store	049b3ded-0970-404e-91d6-5159dde36c1c	Is there a problem with local or international transfers? Every time I try to make a local transfer, it says to try again later, for a month now.	Ahmed Salem	##########			0	en	us		1	ar	problem local international transfer every time try make local transfer say try late month	Negative	0	1	0
Google Play Store	144cfabd-8b5f-41bc-89de-9c4d2df8e46b	Goodness	Ah Maher	##########			0	en	us		5	ar	goodness	Positive	0	0	0
Google Play Store	60c13e2c-5b07-4ddb-a2be-59bda37e9614	The option to print the digital card is always not working, it displays an error message. Please try again later.	mohammed Al	##########			0	en	us		1	ar	option print digital card always work display error message please try late	Negative	0	1	0
Google Play Store	44469912-1e79-47b2-aba0-85dd1fcf54eb	One of the best banks is the speed of service, the sophistication of employees, organization, and concern for the partner's interests.	محمد حمودي	##########			0	en	us		5	ar	one best bank speed service sophistication employees organization concern partner interest	Positive	0	0	0
Google Play Store	cdd0e9d3-ef13-44e2-9a42-14faaad63e03	I need to use Alinma Express to make an international transfer to Yemen. I am required to enter a 9-digit account number, while the beneficiary has a 10-digit account number.	Maher Nabil	##########			0	en	us		3	ar	need use alinma express make international transfer yemen require enter digit account number beneficiary digit account number	Neutral	0	1	0
Google Play Store	4df3db49-de25-4293-8237-8854ed0ee517	The best banking application in terms of stability.	Meteb Al-Yosef	##########			0	en	us		5	ar	best bank application term stability	Positive	0	0	0
Google Play Store	4006140e-9abf-4aba-b887-f61fc652026b	One of the distinctive banking applications in terms of form and content!	ALBARA ALGHAMDI البراء الغامدي	##########			0	en	us		5	ar	one distinctive bank applications term form content	Positive	1	0	0
Google Play Store	686890c1-2414-40a0-a89c-42c73268f2bc	The application has significantly improved and become much better than the old version, but recently, the login message has been delayed a lot, taking two or three minutes to arrive, which is very annoying. It is necessary to resolve this issue or at least enable fingerprint login as an additional login method instead of the message.	Ali Alshehri	##########			0	en	us		4	ar	application significantly improve become much good old version recently login message delay lot take two three minutes arrive annoy necessary resolve issue least enable fingerprint login additional login method instead message	Negative	0	0	1
Google Play Store	6e149f98-3c84-40fe-81a1-f2a54437ffce	Masha Allah, Tabarak Allah.	Mohamed Elborai	##########			0	en	us		5	ar	masha allah tabarak allah	Positive	1	0	0
Google Play Store	17145d25-2417-42fa-a818-62a5c049d7bb	Very easy to use application. Excellent customer service. But it needs frequent updates.	Mohamed Hamid	##########			0	en	us		3	ar	easy use application excellent customer service need frequent update	Positive	0	0	0
Google Play Store	ee242a38-c8be-4559-ab08-b75b99ba7097	Practical and easy-to-use application.	Hazem Abu Swaireh	##########			0	en	us		5	ar	practical easytouse application	Positive	0	0	0
Google Play Store	a574d072-2a51-4065-aab6-e5c3f7394712	Excellent and practical application	Aziz Ellaziz	##########			0	en	us		5	ar	excellent practical application	Positive	0	0	0
Google Play Store	ba7248e5-c00a-450a-921f-7a622e64ceef	The latest update removed the invoices and is slow.	mughram ghamdi	##########			0	en	us		1	ar	late update remove invoice slow	Negative	0	0	1
Google Play Store	9ae21e0e-1a9b-4d42-aaf3-8b6d655f612b	Unfortunately, there has been a decline in electronic services after it used to be the best.	Mohammad alkhalifah	##########			0	en	us		2	ar	unfortunately decline electronic service use best	Negative	1	0	0
Google Play Store	43582588-c73f-4229-9273-d07cf399137f	Unfortunately, it is very bad and extremely backward because, if the application is running, it is impossible to withdraw any amount from any exchange.	أ. عبدالله بن محمد العوفي	##########			0	en	us		1	ar	unfortunately bad extremely backward application run impossible withdraw amount exchange	Negative	1	1	1
Google Play Store	5eba952a-5bd2-4606-8a1c-44a31fc56561	Special application	Mosalah Ldonk	##########			0	en	us		5	ar	special application	Neutral	1	1	0
Google Play Store	ba1df18d-edc8-48a9-9ed0-5e156f7544fc	The best bank ever, and the best deal, Alinma Bank is the epitome of elegance. The problem is that the application needs to be updated every short period of time.	Mhammad Alcadri	##########			0	en	us		5	ar	best bank ever best deal alinma bank epitome elegance problem application need update every short period time	Positive	0	0	0
Google Play Store	38d25738-dccb-4053-b158-ca0fa113d347	Please provide me with the application update and prevent me from logging in, knowing that it is updated.	Amr Sherif	##########			0	en	us		1	ar	please provide application update prevent log know update	Negative	0	1	0
Google Play Store	390155eb-dcc5-4d68-a468-a252eec37275	Good	Tariq Younis	##########			0	en	us		2	ar	good	Positive	0	0	0
Google Play Store	c3d066db-5a0c-4271-8eed-cb58a0d94ca2	The best bank.	عبدالعزيز العصيمي	##########			0	en	us		5	ar	best bank	Positive	0	0	0
Google Play Store	abd6a77d-fdd8-461d-932a-5bfab17fea9d	The application is excellent but I don't know about the new update, it is not compatible with Huawei devices. I hope you can fix this issue. Thank you.	jamal_mj jamal_mj	##########			0	en	us		4	ar	application excellent dont know new update compatible huawei devices hope fix issue thank	Negative	1	1	0
Google Play Store	531676ae-64e7-4799-990f-9ab09d0a1387	This application is very beautiful, simple, and practical to the maximum extent.	dr mohamed	##########			0	en	us		5	ar	application beautiful simple practical maximum extent	Positive	0	0	0
Google Play Store	e80debfd-3117-4a32-a9f2-8905dfe25e4d	My favorite bank since childhood without question 🤍	Rashid Albuainain	##########			0	en	us		5	ar	favorite bank since childhood without question	Positive	0	0	0
Google Play Store	18a1139b-7c7d-49aa-93c4-3973fe2b928f	The best banking application.	Obada Katranji	##########			0	en	us		5	ar	best bank application	Positive	0	0	0
Google Play Store	22856e55-7b78-4ff9-8787-3995fb3ff2b1	Very easy and comfortable.	eng hoba	##########			0	en	us		5	ar	easy comfortable	Positive	0	0	0
Google Play Store	2764c04d-6aca-4ce4-9d66-85f85d04ca44	The application is really excellent, but the problem is that they are asking for the latest update in order to enter the application, and I was outside the house and the store was closed, so I couldn't update it. This is a bad move, and if it continues, I will delete my account.	Mohammed Meshal	##########			0	en	us		1	ar	application really excellent problem ask late update order enter application outside house store close couldnt update bad move continue delete account	Negative	1	1	0
Google Play Store	e0d857d9-da08-4fa2-add5-fc1f53345463	Aval Bank is a Saudi bank that I interacted with through phone customer service. The customer service professionals at the bank are professional and they treat customers with respect. May Allah reward you and bless you.	Mostafa Hanafy	##########			0	en	us		4	ar	aval bank saudi bank interact phone customer service customer service professionals bank professional treat customers respect may allah reward bless	Positive	1	0	0
Google Play Store	eb3b5132-626e-4d96-93aa-5d0c2833c9af	Excellent service	Ahmed Okasha	##########			0	en	us		5	ar	excellent service	Positive	0	0	0
Google Play Store	a3cd0eb2-30a1-40d5-bbd3-ffa1c506c5a4	May Allah reward you with goodness.	mohd k t	##########			0	en	us		5	ar	may allah reward goodness	Positive	1	0	0
Google Play Store	936664f8-9562-42e5-bb22-bfc42eae8fc3	Excellent services and very easy application.. May Allah bless you.	Hadi Amar	##########			0	en	us		5	ar	excellent service easy application may allah bless	Positive	0	0	0
Google Play Store	720c4470-a93a-4e3e-9c07-fc27ea249d8d	Unfortunately, they refuse to make the transfer through Western Union, despite completing all the steps correctly. We filed two complaints and they were automatically closed. It is a bad service.	Abo Nemer	2022-04-07 00:06:00			0	en	us		1	ar	unfortunately refuse make transfer western union despite complete step correctly file two complaints automatically close bad service	Negative	1	1	0
Google Play Store	ec9ee030-8446-4ef5-9eb5-9aa3faa0a29c	The program is designed to be simple and clear. Thank you for your efforts.	Mohammed Alghamdi	2022-04-06 09:31:00			0	en	us		5	ar	program design simple clear thank efforts	Positive	0	0	0
Google Play Store	41a05e1a-d302-46e2-9276-b9c242128b63	The coolest smooth application	hamdi alakhali	##########			0	en	us		5	ar	cool smooth application	Positive	0	0	0
Google Play Store	60930e26-e2b9-4c54-ad3e-222aa3516ed9	Excellent, by Allah.	Doha Soliman	2022-04-01 00:59:00			0	en	us		5	ar	excellent allah	Positive	0	0	0
Google Play Store	bde01b48-e3b4-40d9-9c1f-698cef224308	A wonderful application that has very good features, Mashallah.	97_Dark_1	##########			0	en	us		5	ar	wonderful application good feature mashallah	Positive	0	0	0
Google Play Store	4c4487a0-ddd5-4ab8-84d0-49183f42e28b	The most beautiful and classy bank.	m Abtkar alhaqeqe almokawlat	##########			0	en	us		5	ar	beautiful classy bank	Positive	0	0	0
Google Play Store	40ed0f0f-bb2d-47d2-bcef-43828aaf1885	Wonderful	Mohammed Habib	##########			0	en	us		5	ar	wonderful	Positive	0	0	0
Google Play Store	dc2eaf33-0bf2-45d2-8dd2-563a36511f82	Easy to use and fast, covering all the services.	Sami Salih	##########			0	en	us		5	ar	easy use fast cover service	Positive	0	0	0
Google Play Store	f7d186ba-02c1-46f9-a6de-f19de1238562	The bank is stingy. They created a webpage and named it "Application". It's a garbage bank, only Al Rajhi is doing excellent work, as for the rest, they are rubbish. I strongly dislike them.	egrami one	##########			0	en	us		1	ar	bank stingy create webpage name application garbage bank al rajhi excellent work rest rubbish strongly dislike	Negative	1	0	0
Google Play Store	a91893b2-13d4-4304-bc3d-8d6c99b8fd4b	The second to last update was bad and caused the persistent commands to not appear and prevented adding a new command. The latest update also did not solve the problem, as the old application still does not display the recipient's name and amount in the persistent commands menu. Therefore, the other information is not useful and there is a possibility of confusion.	Yousef	##########			0	en	us		2	ar	second last update bad cause persistent command appear prevent add new command late update also solve problem old application still display recipients name amount persistent command menu therefore information useful possibility confusion	Negative	1	1	0
Google Play Store	4940fca9-889c-4e52-9fb3-76b53487b280	Unfortunately, after experiencing poor services.	North Wind	##########			0	en	us		1	ar	unfortunately experience poor service	Negative	1	0	0
Google Play Store	20aceea9-21af-42fa-a313-548e83766cfd	Integrated	MohammedRMA	##########			0	en	us		5	ar	integrate	Neutral	0	1	0
Google Play Store	3707f2c4-182d-415d-b387-c1d4f52ee817	There is a problem with your application. I went to the website and created an account, downloaded the application, but when I tried to log in, it says the password is incorrect, even though I changed the password and tried to log in again, but the same problem persists.	Tawfiq Abu Seba	##########			0	en	us		2	ar	problem application go website create account download application try log say password incorrect even though change password try log problem persist	Negative	0	1	0
Google Play Store	a245d185-dd12-466a-a0da-7e4da101f8bf	The period of inactivity before automatically logging out is very short and extremely annoying, and there is no option to determine the session expiration time.. Sometimes we work on a topic and we have to log in again and again.	Amer Android	##########			0	en	us		2	ar	period inactivity automatically log short extremely annoy option determine session expiration time sometimes work topic log	Negative	1	1	0
Google Play Store	8a4e7de8-f65f-4793-87b5-3d7a77542e17	Thank you, Alinma.	Abdulaziz Moflah	##########			0	en	us		5	ar	thank alinma	Positive	0	0	0
Google Play Store	cdfe2c03-fed1-4348-9019-caf55ce93a8c	The withdrawal and deposit alerts do not reach the mobile phone.	Alaa Abdeen	##########			0	en	us		3	ar	withdrawal deposit alert reach mobile phone	Neutral	0	1	0
Google Play Store	841430b8-6aa3-49dd-93a0-827f278fd7dc	Excellent bank and services couldn't be better.	Manaf Hassan	##########			0	en	us		5	ar	excellent bank service couldnt good	Positive	1	0	0
Google Play Store	394f4ca3-0afc-4f32-9c4e-b839649d7da9	The bank is very slow in completing tasks or issuing salary cards, and the employees are not serious in completing tasks.	nabil Elhady	##########			0	en	us		1	ar	bank slow complete task issue salary card employees serious complete task	Negative	0	0	1
Google Play Store	ad796ab2-a6d5-4c57-b158-5eab840aaa40	"The best application."	tasmem studio	2022-02-06 05:22:00			0	en	us		5	ar	best application	Positive	0	0	0
Google Play Store	be50042a-e0e8-4d51-9e75-0be525dbde8a	Bad, every time you log in, you have to update the code.	Yasser Yousif	##########			0	en	us		2	ar	bad every time log update code	Negative	1	0	0
Google Play Store	9b695f80-a61d-4e88-b40c-67a0c1b84e89	The best bank 👍🏻	YASSER	##########			0	en	us		5	ar	best bank	Positive	0	0	0
Google Play Store	638f0af2-e34a-4504-8fb0-4ff1d22e7e5e	"An easy and fast application with a very convenient quick login feature."	Abdullrahman Ali	##########			0	en	us		5	ar	easy fast application convenient quick login feature	Positive	0	0	0
Google Play Store	4394c561-29ab-470d-8571-08a6b677ae9f	Good and easy application.	فاطمه الشمري	##########			0	en	us		5	ar	good easy application	Positive	0	0	0
Google Play Store	8271c366-4e3f-4044-a854-055336b177a1	The program is excellent and user-friendly. Thank you for your efforts and work to satisfy customers.	Mohammad Fallatah	##########			0	en	us		5	ar	program excellent userfriendly thank efforts work satisfy customers	Positive	1	0	0
Google Play Store	b08ecba7-df13-4611-86f3-146fe6587544	Easy-to-use app	Mohammed Hassan Alsaggaf	##########			0	en	us		5	ar	easytouse app	Positive	0	0	0
Google Play Store	47348573-caba-4161-988e-cc51fa619cb3	Good experience	يونس علوش	##########			0	ar	us		5	ar	good experience	Positive	0	0	0
Google Play Store	fe874b41-baf4-417d-a7ee-ddf2dfff0a0f	It does not deserve anything, sadly.	ام سليمان زين	##########			0	ar	us		1	ar	deserve anything sadly	Negative	1	0	0
Google Play Store	8e9515e8-83b2-4aeb-a5f0-512138dc7b43	Very bad application... I didn't ask to try another application from you... It's rejected to login, claiming that I chose to try the new application.	Esam Azim	##########			0	ar	us		1	ar	bad application didnt ask try another application reject login claim choose try new application	Negative	1	1	0
Google Play Store	8f298630-f8d5-4a7a-810a-6c310200aaf7	The application is extremely bad, unstable, and crashes suddenly.	Saad Alabdulwahab	##########			0	ar	us		1	ar	application extremely bad unstable crash suddenly	Negative	1	1	1
Google Play Store	7892dd63-7d07-4eae-b1e2-6183486569b2	the worst and sterile application.	ib cool	##########			0	ar	us		1	ar	bad sterile application	Negative	1	0	0
Google Play Store	6d93c1b8-7385-4f66-a2b1-dedd0b539c74	The visitor's identity is appreciated in opening an account.	ابو راشد	##########			0	ar	us		1	ar	visitors identity appreciate open account	Positive	0	1	0
Google Play Store	04df5d86-8259-45d6-a02d-efd9cea782b1	Very bad, every time I enter it says that the information is incorrect, even after retrying.	Mahmoud Alaa	##########			0	ar	us		1	ar	bad every time enter say information incorrect even retry	Negative	1	1	0
Google Play Store	2299351e-8d60-4bc5-9210-bb365ae7d27d	Why did the trial version force me to enter my password and start opening the application? What is the purpose of this action?	sm abdullah	##########			0	ar	us		1	ar	trial version force enter password start open application purpose action	Negative	0	1	0
Google Play Store	33294617-2acc-432d-829f-3ca92c7d07df	Al-Inma Bank is excellent, with high-quality services. Thank you.	Wesam Ahmad	##########			0	ar	us		5	ar	alinma bank excellent highquality service thank	Positive	0	0	0
Google Play Store	543f755d-434e-4ac0-b680-ee021bb3dfff	The application suddenly stopped working. What happened?	Engil Co	##########			0	ar	us		1	ar	application suddenly stop work happen	Negative	0	1	0
Google Play Store	734bb96d-9dc8-4dab-b520-efef57eef767	The new update is very excellent, with a distinctive design.	Mohmm Almohm	##########			0	ar	us		5	ar	new update excellent distinctive design	Positive	1	0	0
Google Play Store	3d3cb49f-ea8e-427b-b6cc-0f6a511c7928	The applications are not working as before, there is a malfunction that needs to be fixed.	abdUalmoeiz AlHudhaifi	##########			0	ar	us		1	ar	applications work malfunction need fix	Negative	0	1	0
Google Play Store	c88f4482-d3ca-4b35-b379-5cdd129a5a2d	The worst application, we decided to withdraw money from Alinma to Al-Rajhi.	أبو لؤي الفتح	##########			1	ar	us		1	ar	bad application decide withdraw money alinma alrajhi	Negative	1	0	0
Google Play Store	83a5791b-40c3-4e69-828b-4885c25db4bb	the worst and very bad application. The old application does not open, and unfortunately, neither does the new application.	Mayyad Hassan	##########			0	ar	us		1	ar	bad bad application old application open unfortunately neither new application	Negative	1	1	0
Google Play Store	dd1045fb-fa4f-4211-9df4-6daccf5a0942	Very very very bad application.	بسمه زايد	##########			0	ar	us		1	ar	bad application	Negative	1	0	0
Google Play Store	c253ae15-f9c7-49ec-aee0-104ada6fba98	There is a problem with the application. Whenever I open the application, it closes automatically.	Redwan Farea	##########			0	ar	us		1	ar	problem application whenever open application close automatically	Negative	0	1	0
Google Play Store	db858b23-57d3-48ec-90ce-ae823fbc25be	What's the problem? The application is not speaking, why?	هاجر ابو بكر	##########			0	ar	us		5	ar	whats problem application speak	Negative	0	1	0
Google Play Store	be4da4e9-d298-4b78-84a6-303c8a07ff3c	The application is not working and does not accept account opening. The services on the website are poor, complicated, and incomplete.	علي الخولاني	##########			0	ar	us		1	ar	application work accept account open service website poor complicate incomplete	Negative	1	1	0
Google Play Store	ac08fc83-afeb-481e-af9e-72737d9b6a98	Unfortunately, the application	بندر الخالدي	##########			0	ar	us		1	ar	unfortunately application	Negative	1	0	0
Google Play Store	e1868228-7032-4ee9-b18d-d9440f98eb17	It needs a lot of additions	BOLT ADAMS	##########			0	ar	us		4	ar	need lot additions	Neutral	1	0	0
Google Play Store	fbed66cf-797a-4490-9cf0-79e1d95d3213	This version is excellent (the old one), while the new version is a failure in every sense of the word.	asem169 pc	##########			0	ar	us		5	ar	version excellent old one new version failure every sense word	Negative	1	1	0
Google Play Store	7c73d2e9-c9b0-4b46-935c-aeba23b03475	Excellent	حليمه هوسه	##########			0	ar	us		5	ar	excellent	Positive	0	0	0
Google Play Store	d36736e2-d8a0-4475-b678-26b8071e05ae	good	Noor	##########			0	ar	us		5	ar	good	Positive	0	0	0
Google Play Store	fb31b3ac-403b-4e67-98e7-b8bed0753ecf	Unfortunately, the old version was much better. This update has made it take a lot of time to complete some transactions, similar to the time it takes to read the privacy policy.	abo yosof	##########			0	ar	us		5	ar	unfortunately old version much good update make take lot time complete transactions similar time take read privacy policy	Negative	1	0	1
Google Play Store	c8c96f85-63b4-418c-bac2-4d0899057f2d	Much better than the new application .. Your old is your companion.	عبدالرحمن محمد	##########			0	ar	us		5	ar	much good new application old companion	Positive	1	0	0
Google Play Store	1e94180a-b2a3-4a72-818e-0865daffac9a	The old version is much better.	mega egypt	##########			0	ar	us		1	ar	old version much good	Positive	1	0	0
Google Play Store	b6bc66d1-215a-4d71-b652-0d5b4678a311	I don't know what the problem is with me or with this update.	المطلق الطوراني	##########			0	ar	us		1	ar	dont know problem update	Negative	0	1	0
Google Play Store	54e72eeb-5cf8-479d-af22-cac08fb89327	Stupidity, then stupidity, then stupidity.	alaa sous	##########			2	ar	us		1	ar	stupidity stupidity stupidity	Negative	1	0	0
Google Play Store	3115fb15-3d22-4e45-8695-2de5b5c69023	There is a new application for Alinma Bank.	Mohamed b	##########			0	ar	us		5	ar	new application alinma bank	Neutral	1	0	0
Google Play Store	b707e083-1edc-4e01-a9b6-73acc056b950	The application requires an update.. And the new application is very bad.	Mohamed _77	##########			0	ar	us		1	ar	application require update new application bad	Negative	1	0	0
Google Play Store	ab2aa528-5fd5-4146-ba1b-4b9d55cd369c	The application will log me in when I enter the application.	ASHRAF Al-Ghamdi	##########			0	ar	us		2	ar	application log enter application	Neutral	0	1	0
Google Play Store	307a6ba0-c18d-4076-ba19-a6bd97bb02ad	The program is not working after the update. The input data is incorrect and I have tried entering the username and password multiple times but the same problem persists. I am currently deleting the program and may delete my account once.	سليمان العبدالله	##########			0	ar	us		1	ar	program work update input data incorrect try enter username password multiple time problem persist currently delete program may delete account	Negative	0	1	0
Google Play Store	cf6a9235-64e7-49c7-ba7b-93dee204f036	Every time I try to access it, it tells me error, and I changed the password, but it's still the same.	Weduan Balal	##########			0	ar	us		1	ar	every time try access tell error change password still	Negative	0	1	0
Google Play Store	f1bd861c-52fd-4284-8185-41858ad9dfe5	It hangs and when I open the login page, it immediately logs me out.	bdbdo 4545	##########			1	ar	us		1	ar	hang open login page immediately log	Negative	0	1	1
Google Play Store	8331e4a6-86db-4573-a3e2-01f6ef9166db	Very bad, I want to add a beneficiary to Western Union but it is being rejected.	omar gamal rageh	##########			0	ar	us		1	ar	bad want add beneficiary western union reject	Negative	1	0	0
Google Play Store	4a6b4d7b-7089-49bc-9cda-01983081c0d5	After the mandatory update, I was unable to log in.	Nawfal Alfatahi	##########			1	ar	us		1	ar	mandatory update unable log	Negative	0	1	0
Google Play Store	40b6aa75-b0d7-4740-9f45-d046a02d70ac	I cannot login to the application as it immediately logs me out upon entering the password.	برجس الجربا	##########			0	ar	us		2	ar	login application immediately log upon enter password	Negative	0	1	0
Google Play Store	383db1be-5bdf-4c29-b2d0-e70214aa4778	It is very bad, to the extreme that it refuses to log in and kicks me out of the application. Why is that?	azoz0073 Nasera	##########			0	ar	us		1	ar	bad extreme refuse log kick application	Negative	1	1	0
Google Play Store	94795dac-823d-4cdd-8940-d5a6946742a0	I had the worst experience with a nerve disease because of this bank.	Haouss Ayoub	##########			0	ar	us		1	ar	bad experience nerve disease bank	Negative	1	0	0
Google Play Store	033f6fb1-e73f-4ef3-8239-a2f9e1975c88	The bank is better than excellent, its services are very nice, especially the transfer through Western Union and Creamy Express. We thank you for these wonderful services.	ABDULRAQIB ALhimaydi	##########			0	ar	us		5	ar	bank good excellent service nice especially transfer western union creamy express thank wonderful service	Positive	0	0	0
Google Play Store	ffacf0e1-35b4-4056-9b73-92e217585e7e	The epitome of bad is an application at the height of failure. Go back to the previous update.	Edward Karnby	##########			0	ar	us		1	ar	epitome bad application height failure go back previous update	Negative	1	1	0
Google Play Store	ff8d80d5-795a-44b2-b531-1a703f32d309	We kindly request that you respect our desire not to force us to download the new application, as it is causing disruptions in our transactions due to authentication issues. The current application that we are using is much better, and it is much easier to work with.	محمد الكثيري	##########			3	ar	us		1	ar	kindly request respect desire force us download new application cause disruptions transactions due authentication issue current application use much good much easy work	Neutral	0	1	0
Google Play Store	e58de7c8-cdec-45ab-9fe4-eda247475d4d	The application logs me out as soon as I log into my account.	mood X	##########			0	ar	us		1	ar	application log soon log account	Neutral	0	1	0
Google Play Store	5ea12c2e-0565-4689-8d98-79294d8f2771	After three failed attempts to transfer to another account at Alinma Bank, he finally succeeded on the fourth try.	We We	##########			0	ar	us		1	ar	three fail attempt transfer another account alinma bank finally succeed fourth try	Neutral	0	1	0
Google Play Store	6d5f6f6d-dfe7-4917-aae3-d0b55cfc96e7	Beautiful application and even better.	مؤسسة أطياف الجنوب للعشب ”مؤسسة أطياف الجنوب للعشب“ والعشب الجداري وبديل الخشب	##########			0	ar	us		5	ar	beautiful application even good	Positive	0	0	0
Google Play Store	a751fc2c-bc87-4f6f-9fc6-9aa223717d5f	The problem of development is the abundance of updates.	احمد احمد احمد	##########			0	ar	us		5	ar	problem development abundance update	Negative	0	1	0
Google Play Store	4c1d88da-7012-4dd9-9541-e35fac7d2f8f	Hey everyone, I have a problem with the application. Every time I open it, it doesn't load and exits. What's the solution? I've deleted it and downloaded it again, but the same issue is happening.	محمد كمال	##########			0	ar	us		1	ar	hey everyone problem application every time open doesnt load exit whats solution ive delete download issue happen	Negative	0	1	0
Google Play Store	2693b2b8-8b49-4433-8d2c-7a29993c88f5	Very bad	hanan mohammad	##########			0	ar	us		1	ar	bad	Negative	1	0	0
Google Play Store	7aeb74c2-38f0-48c0-ab0d-f015fd26f353	And even the rating is low on it, by Allah, the application is terrible and it keeps crashing all the time.	FAMMA HAJA	##########			0	ar	us		1	ar	even rat low allah application terrible keep crash time	Negative	1	1	1
Google Play Store	72c79672-5d66-46d7-9fe6-df71b5c154a0	Not good.	حمود محمد	##########			0	ar	us		1	ar	good	Negative	0	0	0
Google Play Store	38a4714c-3077-4b0c-9dba-32bcabc085e6	Very bad	بوعبدالله الجربوع	##########			0	ar	us		1	ar	bad	Negative	1	0	0
Google Play Store	4aee2717-5eba-47d8-aa7c-1da47a9a26ab	The application does not work when logging in. Please fix it quickly. Unfortunately, the application is bad.	Mohamed Gber	##########			1	ar	us		1	ar	application work log please fix quickly unfortunately application bad	Negative	1	1	0
Google Play Store	12dba0cc-f014-43f4-aa1c-44c25ddbdee0	Excellent summary of data and cards on one page.	Mssm Al-salem	##########			0	ar	us		5	ar	excellent summary data card one page	Positive	1	0	0
Google Play Store	56136ae1-d1e7-400a-a5e0-1117fac33c23	The application has many problems, but the most important and the latest one is that it closes as soon as I press the keyboard to enter the password, even though I canceled it several times and downloaded it again, but the same flaw occurs every time.	Adil Atrees	##########			3	ar	us		1	ar	application many problems important late one close soon press keyboard enter password even though cancel several time download flaw occur every time	Negative	0	1	0
Google Play Store	df26856c-6391-44d4-a3fb-9d7e81ed5b4c	The application is not flexible. It has high security measures that make it complicated. The password and login process are complex, and the application does not allow reading verification messages during operations. The process of adding beneficiaries is also complicated. I hope they benefit from the Al Rajhi application.	1000	##########			0	ar	us		3	ar	application flexible high security measure make complicate password login process complex application allow read verification message operations process add beneficiaries also complicate hope benefit al rajhi application	Negative	1	1	0
Google Play Store	86ed3aff-4900-4521-9b33-d94f30169f60	By Allah, it's not working, my friend. The application is not updating and forcing everyone to enter an application that does not accept your data, and you're unable to access it. The application is not functioning.	Mohammad Youssuf	##########			0	ar	us		1	ar	allah work friend application update force everyone enter application accept data youre unable access application function	Negative	0	1	0
Google Play Store	7df06ab7-a675-4fe7-a795-43335b1f5c53	Very 👎bad	ابو شهاب	##########			0	ar	us		1	ar	bad	Negative	1	0	0
Google Play Store	2c08b821-b936-4a56-b384-b46d19d7bc22	Bad application and not worth even half a star. Since three days ago, every time I open the application, it crashes.	mohammad abdulaziz	##########			0	ar	us		1	ar	bad application worth even half star since three days ago every time open application crash	Negative	1	1	0
Google Play Store	1b078fb3-2907-4ea2-9443-bed923e11b4d	It is not working.	Mostafa Gaber	##########			0	ar	us		1	ar	work	Negative	0	1	0
Google Play Store	86c59776-61b1-47ee-8485-cb944e73d04b	Worst application, and the update is even worse. It doesn't open at all, despite entering all the required information, it still says the entered information is incorrect or invalid. Awful awful awful... Find a solution to this problem quickly!!	Hope A	##########			155	ar	us		1	ar	bad application update even bad doesnt open despite enter require information still say enter information incorrect invalid awful awful awful find solution problem quickly	Negative	1	1	0
Google Play Store	0904d065-9d9a-449a-8432-82db7d4d5421	The application does not open and does not accept updates.	ابو سعود فيصل	##########			0	ar	us		1	ar	application open accept update	Negative	0	1	0
Google Play Store	5322a882-af0d-459b-a410-732cbc1b1b34	Good	شركة نقل عفش بالرياض	##########			0	ar	us		5	ar	good	Positive	0	0	0
Google Play Store	07781858-42b6-46d9-9af7-6a1f9fa67d59	This application is very bad. Every time I try to access the application from the same device, I have to authenticate the device by contacting the bank. The old application was faster and more up-to-date than this. Please address this issue.	Nour sabry	##########			3	ar	us		1	ar	application bad every time try access application device authenticate device contact bank old application fast uptodate please address issue	Negative	1	1	0
Google Play Store	5db0979e-5974-43a4-a6d3-d58764cfe25d	After the update, it started freezing a lot at login time.	Hisham Kalo	##########			0	ar	us		1	ar	update start freeze lot login time	Negative	0	0	1
Google Play Store	486c9580-a934-4c1a-ac98-b468922adc2a	Worse than bad, a very dumb and slow application, but the update to it was mandatory.. even its look, design, and services are irritating in a stupid way. The previous one was simple, easy, and flexible despite some flaws in it, but it is better than this.	K	##########			50	ar	us		1	ar	bad bad dumb slow application update mandatory even look design service irritate stupid way previous one simple easy flexible despite flaw good	Negative	1	0	1
Google Play Store	9e43b474-abd8-4d01-a87a-0f7a035066a7	This application was excellent, but the new one is exhausting and doesn't open.	Mosa Abdw	##########			0	ar	us		5	ar	application excellent new one exhaust doesnt open	Negative	1	1	0
Google Play Store	5d8a0ccf-f866-453a-b8ac-a46a4ab9fb1a	Very excellent	Abdul Dossary	##########			0	ar	us		5	ar	excellent	Positive	0	0	0
Google Play Store	5090a2e7-7d90-4b24-b670-35ffe6dd215d	Jameel Bank is good but it needs credibility. They increased the rate on the mortgage slightly. I transferred my salary to them when the employee told me that the rate was 2.42%, and at the end it turned out to be 2.82%, which is unnecessary. I had to increase it by approximately 100,000. I contacted the management but without any result. I also took a personal loan for renovation and some furnit…	Abdullah 4Fun	##########			0	ar	us		3	ar	jameel bank good need credibility increase rate mortgage slightly transfer salary employee tell rate end turn unnecessary increase approximately contact management without result also take personal loan renovation furniture suitable rate may god pay debt capable everything application need problemsolving often crash access bank application strong investment options flexible profitable return due …	Neutral	1	1	1
Google Play Store	4bac85c5-ef61-43b9-afb8-c4dae4f328f8	Allah is sufficient for me, and He is the best Disposer of affairs.	عزوز عنان	##########			0	ar	us		1	ar	allah sufficient best disposer affairs	Positive	1	0	0
Google Play Store	a2226e77-1979-4452-bb4b-0f53c9b3babf	Very bad.	Mohammed Nageeb	##########			0	ar	us		1	ar	bad	Negative	1	0	0
Google Play Store	137bf1ea-93fc-4f9a-bda0-287e83a78810	Unfortunately, the application started to crash and was transferred to another bank.	Im-problem-xx	##########			0	ar	us		1	ar	unfortunately application start crash transfer another bank	Negative	1	1	0
Google Play Store	349194ff-2d31-435f-a58a-f46d55edf5c7	They forcibly transferred me to the new application, arbitrarily, and the application is very bad, it does not open and hangs a lot. This is injustice and a deterrent to the old bank customers.	Abo Zaid	##########			0	ar	us		1	ar	forcibly transfer new application arbitrarily application bad open hang lot injustice deterrent old bank customers	Negative	1	1	1
Google Play Store	fb575e18-d5e7-49ea-8909-e175f2d70e0b	After the update, the application is very, very bad. It deserves a quarter of a star, but the purpose of giving it 5 stars is to be visible to everyone. ❌️	مقاول.شبوك للملاعب والمزارع (انجاز)	##########			0	ar	us		5	ar	update application bad deserve quarter star purpose give star visible everyone	Negative	1	0	0
Google Play Store	b238b028-15e5-41c6-8fee-9d56e6d2668d	The application is not working for me.	Hussien Alshehab	##########			0	ar	us		5	ar	application work	Negative	0	1	0
Google Play Store	ddf0aba6-a15b-4438-a94c-ea4e04aacee1	The application is bad and won't open, and there is no way to communicate with you. Our work is stuck, why do you transfer us to the new application that is not ready? It redirects us to authentication and won't open. Why do you force us to make the transfer? 😡😡😡😡😡😡	Osama Ahmad	##########			0	ar	us		1	ar	application bad wont open way communicate work stick transfer us new application ready redirect us authentication wont open force us make transfer	Negative	1	1	1
Google Play Store	6ada7aa2-22b5-4d4d-9b49-e4dbeb5b926b	Thank you.	علي عبدالله	##########			0	ar	us		2	ar	thank	Positive	0	0	0
Google Play Store	5d599646-36c0-4281-a93a-bd5bafc8f49f	When I try to enter the program, it tells me there is an input error.	اليمن اصل العرب محمد	##########			0	ar	us		1	ar	try enter program tell input error	Negative	0	1	0
Google Play Store	6257bb31-ee56-47bc-93b8-06fb7a7ee1de	Bad	خالد البخيت	##########			0	ar	us		1	ar	bad	Neutral	1	0	0
Google Play Store	05a35163-c428-46d8-98d1-52c39061435d	Peace be upon you. Important information: This version of the application no longer works. There is a new application for Alinma Bank that works efficiently. I don't know why the bank hasn't deleted this version from the store!!	محمد الحربي	##########			1	ar	us		5	ar	peace upon important information version application long work new application alinma bank work efficiently dont know bank hasnt delete version store	Negative	0	1	0
Google Play Store	cae13138-bf89-42c7-a298-5f795bbff9f8	Failed and doesn't open, asks for an update but there is no update.	RoRo Alhashem	##########			0	ar	us		1	ar	fail doesnt open ask update update	Negative	0	1	0
Google Play Store	5fd96656-8a19-4327-afb9-e8bb30b408c0	The new application is very bad.. It is slow and does not have any new features.. It does not have mobile number transfer or fingerprint login.. It only opens with difficulty and very, very slowly, Innovation is declining.	حياة السعادة	##########			0	ar	us		1	ar	new application bad slow new feature mobile number transfer fingerprint login open difficulty slowly innovation decline	Negative	1	1	1
Google Play Store	2688ad2c-5b0d-4d9f-9a83-7a34f3c63563	Veryyyyyyyyy bad application, the first one is better than it.	بو فيصل	##########			0	ar	us		1	ar	veryyyyyyyyy bad application first one good	Negative	1	0	0
Google Play Store	89949d6b-6cb1-48e2-9fc8-d955f6bc19ce	The application is very bad after the update.	عبدالله الفيفي	##########			0	ar	us		1	ar	application bad update	Negative	1	0	0
Google Play Store	66b68032-06c4-44c9-a4e9-3df53643d410	The application is not working.	M7 MD	##########			0	ar	us		1	ar	application work	Negative	0	1	0
Google Play Store	3be7066d-582b-4c88-b535-ea52b9bd39b0	Please update and develop the website to make it easier.	نونو كناري	##########			0	ar	us		5	ar	please update develop website make easy	Neutral	1	0	0
Google Play Store	4cbcbc6c-0344-4681-95e7-c68e1320d8e1	The worst bank and the worst application.	محمد الشيخ	##########			0	ar	us		1	ar	bad bank bad application	Negative	1	0	0
Google Play Store	af51ff9b-a1bd-4e1f-b2ad-dfc8d77b48c8	Is there a new application available for anime because today whenever I try to enter, it tells me to download the new application, but there is no new application available for them here, and the download takes me back to the login page, I'm afraid of being hacked.	Ghazil D	##########			0	ar	us		1	ar	new application available anime today whenever try enter tell download new application new application available download take back login page im afraid hack	Negative	0	1	0
Google Play Store	35ded2d7-b25f-49f6-9067-d165794716e7	The worst bank in terms of dealing, services, and applications. I hope you improve all your services and treat customers better than these services, as it does not even deserve one star.	lolo.m.g13 Al_ghamdi	2023-09-09 03:53:00			0	ar	us		1	ar	bad bank term deal service applications hope improve service treat customers good service even deserve one star	Negative	1	0	0
Google Play Store	6664c1d8-2b7a-4515-a3be-25391e64c108	Very much	مفلح	2023-09-09 02:44:00			0	ar	us		1	ar	much	Neutral	1	0	0
Google Play Store	0c427358-aae2-4038-87ed-bc1b2db2a658	Why isn't the application opening and there is no update or new version?	وائل منصور	##########			0	ar	us		1	ar	isnt application open update new version	Negative	0	1	0
Google Play Store	d9cef84a-f1af-45ac-aa6a-332ada891736	The application has become very bad, beyond description. When logging in, there is an error, and it is necessary to change the password. The code messages sent to the phone do not arrive, and I have not been able to access the application. Please, kindly solve the problem.	Mohamed Soliman	2023-09-08 08:26:00			5	ar	us		1	ar	application become bad beyond description log error necessary change password code message send phone arrive able access application please kindly solve problem	Negative	1	1	0
Google Play Store	dd2782b3-dea3-4a6a-8e49-348137fcb943	Unfortunately, the user experience is bad. The application is closed and an error message is displayed.	مالك العسيم	2023-09-08 06:03:00			0	ar	us		1	ar	unfortunately user experience bad application close error message display	Negative	1	1	0
Google Play Store	39e41a59-9331-4cef-ab54-218e130898d7	He is not willing to tolerate the flaw in it.	شذى البحرين للعطور والبخور	2023-09-08 04:57:00			0	ar	us		5	ar	will tolerate flaw	Negative	1	0	0
Google Play Store	c0226314-1ac3-40aa-a22d-e3d33498728a	I couldn't update the application and the old application doesn't work. I am now in a very embarrassing situation because I am outside Saudi Arabia and rely heavily on the currency card. Unfortunately, I couldn't do anything.	Ali Alhodayan	##########			11	ar	us		1	ar	couldnt update application old application doesnt work embarrass situation outside saudi arabia rely heavily currency card unfortunately couldnt anything	Negative	1	1	0
Google Play Store	1b34740e-a577-471d-850c-ac0a8e72d457	Beautiful	Salah Terty	##########			0	ar	us		5	ar	beautiful	Positive	0	0	0
Google Play Store	a03b9d9e-8a6e-4412-b568-20219cda9343	By God, the new update is terrible. God bless you.	علي الشمري	##########			0	ar	us		1	ar	god new update terrible god bless	Negative	1	0	0
Google Play Store	6912edaf-24eb-43bf-baf1-c86955221a18	"Excellent application, easy to use, and it informs you about other applications."	عبدالمجيد باعدلان	##########			0	ar	us		5	ar	excellent application easy use inform applications	Positive	0	0	0
Google Play Store	84454636-1133-40c5-b51b-bdf20854d698	Good.	سفيان على البريهي	##########			0	ar	us		3	ar	good	Positive	0	0	0
Google Play Store	e6b32ec4-7e93-4c65-a0cd-ab8ae99c483a	Good.	Moha Da	##########			0	ar	us		4	ar	good	Positive	0	0	0
Google Play Store	7204cd71-6307-45a3-8fc6-008cf67997a3	Excellent, deserves five stars.	أمير amir	##########			0	ar	us		1	ar	excellent deserve five star	Positive	0	0	0
Google Play Store	d844484f-5e16-4abd-b547-d75f2d3e009b	I want to know why the application keeps changing every period, why there is no update. This is the third time I download a new application.	majed fahad	2023-09-07 07:27:00			0	ar	us		1	ar	want know application keep change every period update third time download new application	Negative	0	1	0
Google Play Store	ad56a27d-98f4-48a1-a885-973aad28d360	The application is not working.	Malik Malik	##########			0	ar	us		1	ar	application work	Negative	0	1	0
Google Play Store	738e88ad-5389-48db-b01c-8cd5a708d390	The application does not open on mobile. It says the password is incorrect, even though I am sure that the password is correct. Please solve the problem. Thank you.	مؤيد جلال	2023-09-06 05:47:00			0	ar	us		2	ar	application open mobile say password incorrect even though sure password correct please solve problem thank	Negative	0	1	0
Google Play Store	c3b59cab-a044-4bc1-ada3-9fbfbf066c87	After the recent updates, it became worse. I transferred a certain amount of money, and obviously, the amount was deducted from my balance. However, it did not reach the beneficiary's bank. Also, when I tried to login, I attempted multiple times and an error message appeared for logging in.	Jamal Alahadal	##########			32	ar	us		1	ar	recent update become bad transfer certain amount money obviously amount deduct balance however reach beneficiarys bank also try login attempt multiple time error message appear log	Negative	1	1	0
Google Play Store	368ade17-eabc-412c-aeaa-f94b4bc51009	A very bad application. I am trying to enter my new bank account data, but it gives me an error and when I try again, I cannot complete the information I entered. 🤦‍♀️	Golden Girl	##########			0	ar	us		1	ar	bad application try enter new bank account data give error try complete information enter	Negative	1	1	0
Google Play Store	1f035d8d-aec0-46d7-9248-5a200affd1d4	The new update is bad, it doesn't open and says the password is incorrect.	حسين الموجمي	##########			0	ar	us		1	ar	new update bad doesnt open say password incorrect	Negative	1	1	0
Google Play Store	205f1286-d9d3-446d-ab7e-5f6c4f400a57	It is very, very, very bad. It takes from 5 to 10 minutes to open.	عبدالله ابوالقاسم	##########			3	ar	us		1	ar	bad take minutes open	Negative	1	0	1
Google Play Store	7729eb83-316a-482b-af83-8e94c52f44da	The application is extremely bad. I entered the numbers correctly, it said I made an error, but I swear it is your application that is faulty. Even when I accepted and opened it, it gave me a second page for my account and then brought me back to the login page again, to the point where it made me doubt if the application is hacked. You must find a solution for this absurdity, it is unacceptable …	كلمة حق	##########			5	ar	us		1	ar	application extremely bad enter number correctly say make error swear application faulty even accept open give second page account bring back login page point make doubt application hack must find solution absurdity unacceptable us chaos	Negative	1	1	0
Google Play Store	09abab51-0683-4211-abc5-dbbae5963d61	The best bank.	ِAhmed Sabri	##########			0	ar	us		4	ar	best bank	Positive	0	0	0
Google Play Store	5570a30e-8265-4959-90fa-1b5394dd9005	From five stars to one star, it used to be excellent. Now, you need to delete it and reinstall it every day.	Saleh Saleh	##########			0	ar	us		1	ar	five star one star use excellent need delete reinstall every day	Positive	0	0	0
Google Play Store	4c3344d6-0119-454c-b524-968abe2bff8f	Application failed❌	A _VIP.507	##########			0	ar	us		1	ar	application fail	Negative	0	1	0
Google Play Store	db0f7066-4797-402e-8ddb-56ca053f645d	Honestly, after the latest update... the bank has lost its previous easy, smooth, and distinctive identity compared to other banks. They tried to follow Al-Rajhi Bank's design, but they failed miserably, very, very miserably... And if they continue like this, to be honest, I don't recommend anyone to open an account with a bank that lacks identity. I will close my account and my children's accoun…	اڵڛامڕ	##########			1	ar	us		1	ar	honestly late update bank lose previous easy smooth distinctive identity compare bank try follow alrajhi bank design fail miserably miserably continue like honest dont recommend anyone open account bank lack identity close account childrens account well thank	Negative	1	0	0
Google Play Store	26cbfe7d-5eaa-4154-98df-37715260e8b1	Excellent 👍	ماجد الحربي	##########			0	ar	us		5	ar	excellent	Positive	0	0	0
Google Play Store	3dfb7041-2330-4990-be80-20584d29cc4a	Twenty-four hours suspended	‪bashayer (Alluhaydan)‬‏	##########			0	ar	us		1	ar	twentyfour hours suspend	Neutral	0	0	1
Google Play Store	1a7ff599-4ef1-4dd8-be8a-75b3aa8f59b3	The application does not work quickly.	عبدالله علي	##########			0	ar	us		5	ar	application work quickly	Negative	0	1	0
Google Play Store	b8a9c835-deb8-4e89-a0ab-df1cc03388ca	The latest update is very bad, the application does not work anymore.	Freedom !!!	##########			0	ar	us		1	ar	late update bad application work anymore	Negative	1	1	0
Google Play Store	1d6713fc-b929-4583-bc43-1c1ad65717ac	There is a problem with the application, it is not functioning correctly.	ابوحمد بن عقيل	##########			0	ar	us		3	ar	problem application function correctly	Negative	0	1	0
Google Play Store	ecdc07e3-ab65-4d9f-8ef8-87200ba9825e	I am extremely tired.	Abdullah Ateeq bin falaj	##########			0	ar	us		1	ar	extremely tire	Negative	1	0	0
Google Play Store	e0cadcc9-8851-41ae-9cc7-c4c977258692	Very satisfied	Alaa Assad	##########			0	ar	us		5	ar	satisfy	Positive	0	0	0
Google Play Store	5217378d-6b03-4f16-bbfb-b22c492c5562	By God, it is the worst and most pathetic bank in every aspect, even in customer service there is no service.	عبد الرحمن الحميري	2023-09-05 09:29:00			0	ar	us		1	ar	god bad pathetic bank every aspect even customer service service	Negative	1	0	0
Google Play Store	93b5ef2d-d7a6-4ec9-9c05-a56ba72dbfb7	It's not logical to be hanging all this time. Where are the IT guys?	Gh Vh	##########			0	ar	us		1	ar	logical hang time guy	Negative	1	0	1
Google Play Store	f9c9891b-650e-41f5-b65f-db4a381f83be	Bad application.	Dafallah Ahmed	##########			0	ar	us		1	ar	bad application	Negative	1	0	0
Google Play Store	fd367071-6852-4f6e-84ad-d164d8c2d3b0	There is a new application on the same app page. It says, "Download the new Alinma Bank app, excellent performance✌✌."	طلال الشمري	##########			0	ar	us		1	ar	new application app page say download new alinma bank app excellent performance	Positive	0	0	0
Google Play Store	fb28ba0d-7f85-4941-9d0c-4dec619bae01	Thank you for the excellent services.	Aa Aa	2023-09-04 03:06:00			0	ar	us		5	ar	thank excellent service	Positive	0	0	0
Google Play Store	d3643ffc-ece4-48b1-8b07-39494e84f6a4	Very bad. Every day he comes up with an excuse. One day it's the username, another day it's the password. Why?	اركان احمد الكامل	2023-09-04 00:36:00			0	ar	us		1	ar	bad every day come excuse one day username another day password	Negative	1	1	0
Google Play Store	02e7f526-dcf3-4837-9356-2a8c3288aed7	Beautiful and wonderful application.	مجافي العنزي 86	##########			0	ar	us		5	ar	beautiful wonderful application	Positive	0	0	0
Google Play Store	333d8678-3c8f-4f77-8e1a-8b80710ae3fc	The application is extremely frustrating. Whenever I enter the password, it says it's incorrect. Please enhance the Anmaa Bank application.	هلا ترفيه	##########			0	ar	us		1	ar	application extremely frustrate whenever enter password say incorrect please enhance anmaa bank application	Negative	1	1	0
Google Play Store	4e803a21-94ce-4810-b77e-347e90067f9b	Not functioning and not working currently.	فيصل السراج	2023-09-03 08:32:00			0	ar	us		1	ar	function work currently	Negative	0	1	0
Google Play Store	9bf809eb-20a4-4e30-ab29-4be2a20dffa2	Bad	سارا محمد	2023-09-03 06:47:00			0	ar	us		1	ar	bad	Neutral	1	0	0
Google Play Store	58060c8c-9236-4031-8e4c-83e98fa03a1d	Very very bad, there is a malfunction in the application.	ahmed hassan	2023-09-03 06:09:00			0	ar	us		1	ar	bad malfunction application	Negative	1	1	0
Google Play Store	57536ca0-f8d1-4a7d-a5c8-93578fade50b	An excellent application that makes most things easier for you.	علي مهيوب	2023-09-03 03:33:00			0	ar	us		5	ar	excellent application make things easy	Positive	0	0	0
Google Play Store	411b0f24-74bc-4383-bdb9-a128b77b25e3	The application is very bad. It asks for an update in the store while there is no update available in the store. Please solve the problem as soon as possible.	Bander Abutheeb	##########			0	ar	us		1	ar	application bad ask update store update available store please solve problem soon possible	Negative	1	1	0
Google Play Store	9944584f-6756-424e-bf7a-de5c7f898a0e	Upon entering, it writes to me "happened" event though it didn't happen.	سعود الغويري	##########			0	ar	us		1	ar	upon enter write happen event though didnt happen	Neutral	0	1	0
Google Play Store	b9eba331-d1e3-4a5b-b27e-e1adb33ee6ca	Heavy	عيد و	##########			0	ar	us		3	ar	heavy	Neutral	0	0	1
Google Play Store	3e548038-afab-4901-b46e-cc3abf80d973	The duck is in the opening and sometimes does not work.	Hany Abd elgawad	##########			0	ar	us		1	ar	duck open sometimes work	Negative	0	1	0
Google Play Store	8320ead7-af2a-4909-b915-f4e0ad958693	This comment is very bad. Every time he rejects entry, damn this application!	Sss S	##########			0	ar	us		1	ar	comment bad every time reject entry damn application	Negative	1	1	0
Google Play Store	c152c661-0add-4ff8-85a4-e25c7b71f15b	The new update is not working. When I log into the account, it says "right operand of 'in' is not an object". Please help solve the problem.	Too	##########			0	ar	us		1	ar	new update work log account say right operand object please help solve problem	Negative	0	1	0
Google Play Store	ce1ee802-dc89-4d9d-b4c9-12e1450943aa	Wonderful	Zeed Ali	2023-09-01 02:30:00			0	ar	us		5	ar	wonderful	Positive	0	0	0
Google Play Store	53ec780d-87f5-4d9b-8313-6afb3ff233ea	After updating the application, it became from bad to worse.	فضل الدعيس الدعيس	2023-09-01 00:57:00			0	ar	us		5	ar	update application become bad bad	Negative	1	0	0
Google Play Store	787ad853-8e02-4604-baa7-c25b93c06960	What is this technical problem? I entered the name and password correctly, but it says login is incorrect or not available. I tried changing the password but it still doesn't work. I am frustrated, I need to use the application urgently. I seek forgiveness from Allah the Almighty.	محمد نجاشي	##########			41	ar	us		1	ar	technical problem enter name password correctly say login incorrect available try change password still doesnt work frustrate need use application urgently seek forgiveness allah almighty	Negative	1	1	0
Google Play Store	c7bd9191-b28d-4ce4-8d59-5bd137e4908f	Very good	أطفالي صغاري ملائكه نهاري	##########			0	ar	us		5	ar	good	Positive	0	0	0
Google Play Store	132d4685-c325-4efd-b331-69bab5941c81	The application offers a comparison with other banking applications. It has a feature of quick login with a password or fingerprint. I receive an activation call from the bank and a message confirming the activation. I exit the application and re-enter with the fingerprint or password, but it says the information is incorrect. Even the fingerprint does not work. I do not know how long this proble…	Mujahed Almofty	##########			0	ar	us		1	ar	application offer comparison bank applications feature quick login password fingerprint receive activation call bank message confirm activation exit application reenter fingerprint password say information incorrect even fingerprint work know long problem continue solutions yet	Neutral	0	1	0
Google Play Store	25a65fc4-4570-40c6-bde3-f1118e9db7c2	If someone comes to login, they will tell you that the password and username are incorrect.	محمد بشير الصافي المسلمي	##########			1	ar	us		1	ar	someone come login tell password username incorrect	Negative	0	1	0
Google Play Store	db2df563-1991-4474-ae92-d4c8393bd49d	After the update, it became very bad and does not allow downloading or logging in. Unfortunately, this does not represent the beloved bank to me. However, there seems to be an error or poor follow-up.	قناة F.B.O	##########			0	ar	us		1	ar	update become bad allow download log unfortunately represent beloved bank however seem error poor followup	Negative	1	1	0
Google Play Store	4826cbaf-db8e-4a53-921f-08a7398b0bb3	The application is slow when opening. What is the problem? Also, most of the time it does not open.	Abdulbaki Aljrady	##########			0	ar	us		2	ar	application slow open problem also time open	Negative	0	1	1
Google Play Store	8ddc5511-8e99-46a5-9452-1ca535af2985	Unfortunately	رونا تانا	##########			0	ar	us		1	ar	unfortunately	Neutral	1	0	0
Google Play Store	3fdc7114-f8bc-4cde-b739-3a811256b1f9	Failed application	اشرف محمد	##########			0	ar	us		1	ar	fail application	Negative	0	1	0
Google Play Store	372b3ba8-ce44-4cbc-82d8-5e015b8141ed	Most of the time suspended.	Nuha Alkhattabi	##########			0	ar	us		1	ar	time suspend	Neutral	0	0	1
Google Play Store	c3d78856-b87f-476a-8963-4f9e21b68b4c	It's heavy and hangs a lot, and sometimes it doesn't open.	خالد الحسيني	##########			1	ar	us		1	ar	heavy hang lot sometimes doesnt open	Negative	0	1	1
Google Play Store	96b5c81a-b439-4a06-84ca-ba2530964f47	The application needs to be reprogrammed. If I try to change the password and enter a new password, it does not change.	Abdulrahman SH	##########			0	ar	us		1	ar	application need reprogrammed try change password enter new password change	Negative	0	1	0
Google Play Store	1c171b0c-a301-47c7-9f48-77493628e4bd	Excellent.	أبو منيف الحاتمي	##########			0	ar	us		5	ar	excellent	Positive	0	0	0
Google Play Store	a94232d1-269e-4323-9995-7e720aa521a1	Easy to deal with the beneficiary.	الياس فارس سعيد بن سعيد	##########			0	ar	us		5	ar	easy deal beneficiary	Neutral	0	0	0
Google Play Store	16c1ee3e-350d-4c2d-8aa8-a67a675249ea	The application has changed, guys, to a new one with a white background. Scroll down and you will find more apps from Alinma Bank, then download the white one. This is the first time I see the bank's customers solving their own problems 😂. For a few days now, I haven't been able to access my account and the application closes on me directly. When I accidentally found the new version, at least Ali…	NAIF ALZAHRANI	##########			0	ar	us		1	ar	application change guy new one white background scroll find apps alinma bank download white one first time see bank customers solve problems days havent able access account application close directly accidentally find new version least alinma bank inform us customers new release	Neutral	0	1	0
Google Play Store	49bd7b71-681e-4c92-b518-e3abaaac3d4d	The application has not been working for nearly 40 days; it has been causing us inconvenience.	Abdullah	##########			0	ar	us		1	ar	application work nearly days cause us inconvenience	Negative	0	1	1
Google Play Store	baa58eed-b40a-46b5-800a-b61975f8b4ab	Very good.	حميد صالح الأضرعي	##########			0	ar	us		5	ar	good	Positive	0	0	0
Google Play Store	7bcb8d3c-65d1-4e9a-95e4-b288b4a20b43	The application "Mut'ab" does not open and doesn't work.	ابو خالد	##########			0	ar	us		1	ar	application mutab open doesnt work	Negative	0	1	0
Google Play Store	8c65b3f7-4c56-474e-993a-b4d29bd451eb	The application keeps saying "Error in username or incorrect password."	محمد خلف	##########			3	ar	us		1	ar	application keep say error username incorrect password	Negative	0	1	0
Google Play Store	bbb60343-50f4-48b1-a69e-8af841d09150	Good	Gargor Al Majid	##########			0	ar	us		2	ar	good	Positive	0	0	0
Google Play Store	9c101edc-bcb9-44de-b6e6-336162f511bd	Bad things do not enter and I am fully focused on my work.	خالد loody	##########			1	ar	us		1	ar	bad things enter fully focus work	Neutral	1	1	0
Google Play Store	2b98f911-1bd5-48b5-86c6-e2326692ab0d	Very wonderful	محمد عبد القوي الشرعبي	##########			0	ar	us		5	ar	wonderful	Positive	0	0	0
Google Play Store	2f086f6b-9612-499d-a248-8c4cbe43ab5e	Very bad, it keeps asking for an update and there is no update at all. We hope the problem gets fixed.	أسامة الرحال	##########			0	ar	us		1	ar	bad keep ask update update hope problem get fix	Negative	1	1	0
Google Play Store	5b04bfe7-0dff-495c-8938-ecaf8ff9369e	From bad to worse	أبو حسام السلطان	##########			0	ar	us		1	ar	bad bad	Negative	1	0	0
Google Play Store	5c694513-2773-43c2-af0e-6e5d40f02aa3	I requested an application update but the invoices are not displayed, and finally the application does not open. There is no power or strength except in Allah.	ناصر العضيدان	##########			0	ar	us		1	ar	request application update invoice display finally application open power strength except allah	Negative	0	1	0
Google Play Store	cfa22b99-394b-4c56-a79b-f081d18b5e50	the worst application, meaning it is very very very very bad.	ابو يونس السيد	##########			0	ar	us		1	ar	bad application mean bad	Negative	1	0	0
Google Play Store	2e8ffbbf-046d-4df5-ae97-053421866a85	My experience with Alinma Bank is very excellent, but there have been some problems with the application today. I couldn't log in, it said there was an error on the website.	keng it net	##########			21	ar	us		5	ar	experience alinma bank excellent problems application today couldnt log say error website	Negative	0	1	0
Google Play Store	6b658d12-56c0-4582-bece-95410504d6aa	The worst application doesn't work.	عبدالله العثمان	##########			0	ar	us		1	ar	bad application doesnt work	Negative	1	1	0
Google Play Store	5c0ff397-cd7b-4c06-b02f-8ea5b42b330e	bad	طرب السلطان طرب السلطان	##########			0	ar	us		4	ar	bad	Negative	1	0	0
Google Play Store	d351ce49-bcc4-4a4c-86c1-35e689d11e68	Always comment	أبو حاتم	##########			0	ar	us		1	ar	always comment	Neutral	0	1	0
Google Play Store	fb7b9c5f-b7ad-4d62-824a-40d51bb8af07	A failure, every two days an update and every two days the worst change. This bank doesn't know how to stick to one routine.	Ahmed Of	##########			0	ar	us		1	ar	failure every two days update every two days bad change bank doesnt know stick one routine	Negative	1	1	0
Google Play Store	2458b4c1-1cff-448e-8ed7-ad69547515c4	The employees not responding to me, come tomorrow, come tomorrow, come the day after tomorrow, and so on.	ابو عماد	##########			0	ar	us		1	ar	employees respond come tomorrow come tomorrow come day tomorrow	Negative	0	1	0
Google Play Store	8516f7b0-3a95-4727-adda-6dce418f96f7	Very excellent 👍🏼👍🏼👍🏼	ريان الجربوع	##########			0	ar	us		5	ar	excellent	Positive	0	0	0
Google Play Store	00af18ee-2a5d-4be9-88ff-03ce0d22b625	Excellent.	Riyad Siddig	##########			0	ar	us		5	ar	excellent	Positive	0	0	0
Google Play Store	8960647f-8af6-4e32-a44c-18e33534e77b	Excellent	فارس اليافعي	##########			0	ar	us		5	ar	excellent	Positive	0	0	0
Google Play Store	48dd18b5-6123-4c0c-b1b2-6016c557e348	Good	ناظم الأنصاري	##########			0	ar	us		5	ar	good	Positive	0	0	0
Google Play Store	b8719777-67a4-41b2-83ff-eac060f82632	He doesn't even deserve to be a star of the "Bisaraha" program.	محمد شبير	##########			1	ar	us		1	ar	doesnt even deserve star bisaraha program	Negative	1	0	0
Google Play Store	c5c771bd-5b0d-42cf-b10c-1c14bb4f78da	He refuses to enter the application.	dantil	##########			0	ar	us		1	ar	refuse enter application	Negative	0	1	0
Google Play Store	8a3b27af-63b4-4d92-8766-317813233ea0	The application is lousy and does not work.	Abbas Abbas	##########			0	ar	us		1	ar	application lousy work	Negative	1	1	0
Google Play Store	5f1677fd-03e5-4bf5-b18f-25c7b2310f93	Very good.	Yasser Tahir	##########			0	ar	us		4	ar	good	Positive	0	0	0
Google Play Store	ce2920bf-5246-47cd-a6ff-8302d61796af	The application has been freezing and saying it needs an update, even though I have updated it. Please solve this issue from Alinma Bank administration.	شبل شرعب	##########			0	ar	us		3	ar	application freeze say need update even though update please solve issue alinma bank administration	Negative	0	1	1
Google Play Store	060b50e1-7ac0-4b0e-afa9-a75d8aaec72f	Please, can you explain why the application is not opening and this message appears: "The connection to the server was unsuccessful"?	Sami Saif	##########			2	ar	us		1	ar	please explain application open message appear connection server unsuccessful	Negative	1	1	0
Google Play Store	35b3c1a2-be7c-4e70-b6b2-e8342448e267	jhjh	Kasi Ki	##########			0	ar	us		5	ar	jhjh	Neutral	0	0	0
Google Play Store	7ede0780-733b-4aff-afb5-e13decc320ec	What is the problem after the update? It has become bad again.	عبدالكريم عبده أحمد	##########			0	ar	us		5	ar	problem update become bad	Negative	1	1	0
Google Play Store	f2d32148-fc22-4115-bfc0-fb3fee931b69	I think this is the old application of Alinma Bank, and there is a completely new version better than this application. And Allah knows best.	عبدالهادي الجهني	##########			0	ar	us		1	ar	think old application alinma bank completely new version good application allah know best	Positive	1	0	0
Google Play Store	a2d59bad-cb17-4e9f-b5d1-d7f73d53df3a	"The latest version of the Alinmaa application is very bad, please find a solution."	Barradi Barradi	##########			0	ar	us		1	ar	late version alinmaa application bad please find solution	Negative	1	0	0
Google Play Store	87e32bbb-5cc9-4536-a42e-d7aafe9fdc2a	Very bad	سبحان آلله الحمد لله	##########			0	ar	us		1	ar	bad	Negative	1	0	0
Google Play Store	8491fd63-c63f-4268-9e3c-14362fb5f636	Very bad, if you want to enter the application it refuses and asks for an update and it has several other defects.	Naji Husain	##########			0	ar	us		1	ar	bad want enter application refuse ask update several defect	Negative	1	1	0
Google Play Store	b8efcac8-c647-459c-95e2-d68dc56c92e7	Okay	Fahad Alqahtani	##########			0	ar	us		5	ar	okay	Positive	0	0	0
Google Play Store	2294be40-eddd-48ff-bbfe-049a00e15434	Very bad and does not open quickly, and sometimes does not show the beneficiaries.	عبدالله حيمدان	##########			1	ar	us		1	ar	bad open quickly sometimes show beneficiaries	Negative	1	1	1
Google Play Store	11d979ae-cfad-48cb-9b56-7ca45dcb90c1	Garbage application	علي دالي	##########			0	ar	us		1	ar	garbage application	Negative	1	1	1
Google Play Store	82516790-beeb-481f-a15b-15bce0099805	A very excellent application.	Ibrahim Mohammed Ahmed	##########			0	ar	us		5	ar	excellent application	Positive	0	0	0
Google Play Store	e5ffb3ea-2171-40c3-8c49-968ec8d23edb	Very very very serious	رشيد الحذيفي	##########			0	ar	us		1	ar	serious	Negative	1	0	0
Google Play Store	cb0a3fc1-26a9-4477-a3d4-56a581345420	It doesn't work for me at all.	Aseel	##########			0	ar	us		1	ar	doesnt work	Negative	0	1	0
Google Play Store	2b84b1ce-c9b5-47b3-8ac1-6d9fdfb44586	The worst bank and the worst application.	KSA KSA	##########			0	ar	us		1	ar	bad bank bad application	Negative	1	0	0
Google Play Store	619aba34-4f1e-4f3d-bc01-4a98f47c09e1	Please fix the program. Thank you.	همس المشاعر	##########			0	ar	us		5	ar	please fix program thank	Negative	1	0	0
Google Play Store	a517c61c-f628-4b26-89ce-fd47f1b225ca	He couldn't enter and stay giving me that he has a problem.	احمد الحسنات	##########			0	ar	us		1	ar	couldnt enter stay give problem	Negative	0	1	0
Google Play Store	1b3653be-6a24-45ac-bb9b-1420cc76efec	Application is very very bad and does not open.	وحيد الحاتمي	##########			0	ar	us		1	ar	application bad open	Negative	1	1	0
Google Play Store	f3bbe4df-8b24-495b-b730-080ff164352d	The experience is excellent and the bank is very impressive, by the will and blessing of Allah.	عيسى حيان	##########			0	ar	us		5	ar	experience excellent bank impressive bless allah	Positive	0	0	0
Google Play Store	76ee7f97-070b-4300-8ea1-68313d9b9073	I don't know.	‪Ali Gbli (‫ابوعبده‬‎)‬‏	##########			0	ar	us		3	ar	dont know	Neutral	1	0	0
Google Play Store	f5100ab7-f372-4184-99e3-2db46a65cc88	The best bank, I swear.	ali safwan	##########			0	ar	us		5	ar	best bank swear	Positive	0	0	0
Google Play Store	033133b4-093e-46df-978a-b45d054e2a96	Very very very bad.	ماجد السميري	##########			0	ar	us		1	ar	bad	Negative	1	0	0
Google Play Store	deee235b-34b0-41fe-9184-cb924bae1879	It has become very, very bad. My affairs have been disrupted because of the new update. I don't know what the solution is, should we delete it or what?	شوشة العسل	##########			2	ar	us		1	ar	become bad affairs disrupt new update dont know solution delete	Negative	1	0	0
Google Play Store	2ec61854-d363-46e7-9ead-a88100ef4758	We have been paying the bills for years, and praise be to God, everything is excellent. I don't understand the strange comments; none of their problems have ever happened to me before.	Sarlode - سارلود	##########			0	ar	us		5	ar	pay bill years praise god everything excellent dont understand strange comment none problems ever happen	Positive	1	0	0
Google Play Store	e9be4ec5-27f2-4372-8ecd-02fa74171871	I am unable to open today's date, 9/8/2023, from morning until now, 8 PM. I don't know if the problem is from me or from the application. Anyway, thank you for your excellent service.	Abu Naser	##########			5	ar	us		4	ar	unable open todays date morning pm dont know problem application anyway thank excellent service	Negative	0	1	0
Google Play Store	537f813d-a009-489e-9c00-5dc4aa51237a	The best application does not work after the new update.	Osama Bamatraf	##########			0	ar	us		1	ar	best application work new update	Negative	0	0	0
Google Play Store	77156457-2d93-4f44-a95a-8c25937b8b26	The application is very very unresponsive and crashes frequently. Please try to solve this problem.	فهمي بو محمد	2023-08-08 02:39:00			0	ar	us		1	ar	application unresponsive crash frequently please try solve problem	Negative	0	1	1
Google Play Store	c2f63ef7-d1d7-4486-afc4-3e9986c29ed2	Very bad, every time there is some kind of mistake.	Mostafa Mohamed	##########			1	ar	us		1	ar	bad every time kind mistake	Negative	1	0	0
Google Play Store	5c82a111-fcee-4818-a129-a3ea72c9ce05	The new application doesn't let me in, it says there is an error. What does that mean? It's been two weeks now and I can't log in. When will you fix it?	Mona Norh	##########			0	ar	us		1	ar	new application doesnt let say error mean two weeks cant log fix	Negative	0	1	0
Google Play Store	70749d53-196b-411b-8861-09c843090eb2	This is a vulgar and offensive sentence in Arabic that cannot be translated into English.	qﾑM乇尺 ﾑﾚd乇乇刀んo丂丂ﾑM	##########			0	ar	us		1	ar	vulgar offensive sentence arabic translate english	Negative	1	0	0
Google Play Store	33a0ca75-84f6-40a3-8b6c-63a14ec79edd	Weak, always hesitant.	JAMAL AWAD	##########			0	ar	us		1	ar	weak always hesitant	Negative	1	0	1
Google Play Store	d4de7a86-b585-4c36-9745-bafbfbca0f88	The application doesn't open, even their website has many problems.	Faisal 5	##########			1	ar	us		1	ar	application doesnt open even website many problems	Negative	0	1	0
Google Play Store	a1d63367-0aa5-4f26-93b1-182ddf39b285	Very good.	Haam alawady	##########			0	ar	us		5	ar	good	Positive	0	0	0
Google Play Store	98b1bae3-7e67-47f4-8822-fb4c7eec3ca8	Very, very, very bad application.	عبدالله العنزي	##########			0	ar	us		5	ar	bad application	Negative	1	0	0
Google Play Store	2196820e-c6b5-413b-aadd-7c7f1f28041a	After the update, it does not work and an Application error message appears stating "the connection to the server was unsuccessful."	ام عبودي عبودي	##########			0	ar	us		1	ar	update work application error message appear state connection server unsuccessful	Negative	1	1	0
Google Play Store	21c47271-b550-48ef-910f-cf4aeb705b82	After the update, the application stopped working, and I am traveling now and I need to check my expenses and calculate what I can afford.	أحمد بنه	2023-08-06 07:30:00			1	ar	us		1	ar	update application stop work travel need check expense calculate afford	Negative	0	1	0
Google Play Store	9800d417-efc7-4668-9e97-372e42de13b2	Based on my experience, I hope it will be better than that.	Najib Achwer	2023-08-06 07:03:00			0	ar	us		5	ar	base experience hope good	Positive	1	0	0
Google Play Store	00f60d68-4577-41be-b32d-3f201dd80842	It no longer works when logging in. An error message saying incorrect password is displayed.	أبو العربي السريع	2023-08-06 03:01:00			4	ar	us		1	ar	long work log error message say incorrect password display	Negative	0	1	0
Google Play Store	4dd81aff-0a6d-4e7f-b4d3-8bbc1da396b4	The application is bad and refuses to log in.	عبدالله القحطاني	##########			0	ar	us		2	ar	application bad refuse log	Negative	1	1	0
Google Play Store	7d558845-2fa5-47d9-a3e0-b0624698bc51	I'm tired of trusting this application so much and it always fails me. It's very annoying that it keeps asking for updates all the time. Sometimes I'm in a hurry and it tells me to update. Whoever wants to annoy themselves and hate the bank can download the application.	ريمي	##########			0	ar	us		1	ar	im tire trust application much always fail annoy keep ask update time sometimes im hurry tell update whoever want annoy hate bank download application	Negative	1	1	0
Google Play Store	681ed501-7636-4bf8-abc6-819caa63b4ce	Oh my God! You're so lazy. There is no update available. Our money has been booked and there is no fast entry or normal entry, and even the application's website is not working. It asks for an update and there is no sign of any bank management. Don't read the comments.	محمد السليمي	##########			1	ar	us		1	ar	oh god youre lazy update available money book fast entry normal entry even applications website work ask update sign bank management dont read comment	Negative	1	1	1
Google Play Store	e862b081-b509-40d6-b1fe-c79acc4f4975	Good	ابو عزوز المجرشي	2023-08-04 09:29:00			0	ar	us		5	ar	good	Positive	0	0	0
Google Play Store	19fbe195-8168-4a30-aa1e-38a5cb41f1fe	The application needs a lot of fixes, unfortunately, it is disappointing. For example, it asks for system upgrade constantly. Paying bills for registered bills is not possible. For example, I cannot pay my internet bill or enter a payment amount unless the bill is issued. Why do I have to wait for the system upgrade every time? And why do I have to wait for the bill to be issued and then become d…	ABDULRAHMAN	2023-08-04 03:03:00			46	ar	us		3	ar	application need lot fix unfortunately disappoint example ask system upgrade constantly pay bill register bill possible example pay internet bill enter payment amount unless bill issue wait system upgrade every time wait bill issue become due pay hope consider fix application take look bank applications inspiration honestly favor continuous development keep time glory allah	Negative	1	1	0
Google Play Store	c020c4cd-b45e-4b2f-8d41-33dae97bfa5b	Bad	Nela Store	##########			0	ar	us		1	ar	bad	Neutral	1	0	0
Google Play Store	29c585ff-60f1-4c56-93d3-5c3d9641e6af	Very, very, very bad application.	إسماعيل محمد	##########			0	ar	us		1	ar	bad application	Negative	1	0	0
Google Play Store	ff201bb6-bd0c-4c74-b246-53e4b7cc2cf2	I was contacted by the bank, and I was informed that the work on this non-dispersive compound application will be stopped. This outstanding application will be permanently suspended, and work will be done on the new application imitated from Al Rajhi Bank, which is considered a dispersion compound and contains images and advertisements! This is a serious administrative failure! We kindly request …	احمد عبدالله	##########			0	ar	us		5	ar	contact bank inform work nondispersive compound application stop outstanding application permanently suspend work do new application imitate al rajhi bank consider dispersion compound contain image advertisements serious administrative failure kindly request brothers file complaints stop bank nazi direction thank	Negative	1	1	1
Google Play Store	45677e85-70b7-475c-80ea-9cb62fe8108c	Every time a new update is released, the application becomes more deteriorated and degraded.. It is impossible for the organization responsible for developing the application to be with us in 2023.	sultan alamri	2023-08-03 04:16:00			0	ar	us		1	ar	every time new update release application become deteriorate degrade impossible organization responsible develop application us	Negative	0	0	1
Google Play Store	ec789594-fef9-4a03-af4d-0895471f13cf	It is a shame to be called an application, by Allah, it is the worst banking application I have ever dealt with.	ابوساري	##########			0	ar	us		1	ar	shame call application allah bad bank application ever deal	Negative	1	0	0
Google Play Store	5d6eea3a-1e9d-4a85-914b-8ceed2887d26	Good	عبد الله عبد الله	2023-08-02 05:44:00			0	ar	us		5	ar	good	Positive	0	0	0
Google Play Store	2b6a97a4-8a80-44e3-b932-c9a487e4a110	,Very, very, very, very bad. Every time I try to enter the application, it says an error occurred and there is no update available!! And if I try to log in, it says wrong password or username, even though they are correct.. It's a complete waste of time.. It is necessary to fix this annoying problem.	اسارير الفرح القادم أجمل	2023-08-02 04:22:00			179	ar	us		1	ar	bad every time try enter application say error occur update available try log say wrong password username even though correct complete waste time necessary fix annoy problem	Negative	1	1	0
Google Play Store	551e175f-0305-4fef-a117-e6089ee77514	The application was extremely slow, and now it is not opening at all. It shows an error in the application.	عبد الحميد رمضان	##########			3	ar	us		1	ar	application extremely slow open show error application	Negative	0	1	1
Google Play Store	87652ac5-b94e-4442-bcbc-839853cd823a	The experience began.	خطابه	##########			0	ar	us		5	ar	experience begin	Neutral	1	0	0
Google Play Store	a81d985f-9099-451b-be63-0695c8ab5875	The latest update is very stupid and made people hate dealing with the application.	ابو فهد	2023-08-01 05:46:00			1	ar	us		1	ar	late update stupid make people hate deal application	Negative	1	0	0
Google Play Store	4b4fe8a0-fbf2-47fc-9f27-24676843c10a	The login process is very bad, the code doesn't come quickly, especially when making payments like bills or purchasing from the store. The code takes a long time, sometimes up to half an hour. It's very bad, very bad.	عبدالله الرشيد	##########			0	ar	us		1	ar	login process bad code doesnt come quickly especially make payments like bill purchase store code take long time sometimes half hour bad bad	Negative	1	1	0
Google Play Store	17d9dc1c-ab03-4885-ae6d-70b0891144b3	The application doesn't work most of the time, and now it stopped working for me.	Mozzieta Mozzieta	##########			1	ar	us		1	ar	application doesnt work time stop work	Negative	0	1	0
Google Play Store	c7b8ef29-a6e2-4e0e-bc48-a98e0060dc2f	Unfortunately, it is very slow and does not open.	E- Alshmri	##########			0	ar	us		1	ar	unfortunately slow open	Negative	0	0	1
Google Play Store	714d6b4d-c110-4402-a45e-59ffc1d5569f	Masha Allah	Hfg	##########			0	ar	us		5	ar	masha allah	Positive	0	0	0
Google Play Store	9a47eb97-cee9-421b-8676-60b061c25bd8	They spoke to him and he became rubbish. He is not willing to document the device nor is he willing to enter it. It's going from bad to worse with development, and they laugh at people, saying that you have been chosen to use the new program. Are they mocking us or something?	وافي وافي	##########			0	ar	us		1	ar	speak become rubbish will document device will enter go bad bad development laugh people say choose use new program mock us something	Negative	1	0	0
Google Play Store	bfbac9d2-6ee9-4c16-a877-11f4effbbd49	Advice not to join anyone 👎👎👎 It used to be one of the best banking applications, but now with the new update, neither the customer support nor the bank respond 🤬.	ABU NAYF	##########			6	ar	us		1	ar	advice join anyone use one best bank applications new update neither customer support bank respond	Negative	0	1	0
Google Play Store	3d4318d5-1e73-4d18-a39a-57789c2760fe	Bad application and doesn't open.	Ahmed mossa	##########			0	ar	us		1	ar	bad application doesnt open	Negative	1	1	0
Google Play Store	16b6813b-4f68-43bf-83ab-119ad1efd737	Good	محمد المنصوري	##########			0	ar	us		5	ar	good	Positive	0	0	0
Google Play Store	08342454-d68a-4c98-8f57-0c227f0f745d	The application is slow, and I couldn't change my password. The reason is that the application freezes, causing all these problems.	ツb̷l̷a̷c̷k̷	##########			8	ar	us		1	ar	application slow couldnt change password reason application freeze cause problems	Negative	0	1	1
Google Play Store	bde8387b-1ede-4f31-86de-46295bf4e5b1	Almost this app became the most failed. Since yesterday, I've been trying to open the app, but it won't open.	Ali Morsy	##########			4	ar	us		1	ar	almost app become fail since yesterday ive try open app wont open	Negative	0	1	0
Google Play Store	f25db7b5-ae5d-4a08-809e-07bcf2a0e754	After the update, it became the dumbest application, God is sufficient for me and He is the best in avenging. After a long struggle, you succeeded in a good version - why do you force people to update your ridiculous updates?	صالح سليمان السحامي	##########			1	ar	us		1	ar	update become dumb application god sufficient best avenge long struggle succeed good version force people update ridiculous update	Negative	1	0	0
Google Play Store	85bfe0d0-9d22-4465-bcb6-fba33113ce7f	Very slow	Kumail Ali	##########			0	ar	us		1	ar	slow	Negative	0	0	1
Google Play Store	f7cd0556-ddfc-4ae0-b4e9-6a40fd749d1a	Excellent	hashem al-Gahmdi	##########			0	ar	us		5	ar	excellent	Positive	0	0	0
Google Play Store	f4cea400-1620-4cd6-ac39-0a74b8badaba	The problem is that when I try to access this application, it refuses to let me in and says I have been selected to try the new application. The new application is garbage and it refuses to let me in. May God curse the idiot who chose me. Now even my account and transactions are affected; I cannot access them. They should have made a good application first, then implemented such stupid selection …	عبدالرحمن ابراهيم	##########			46	ar	us		1	ar	problem try access application refuse let say select try new application new application garbage refuse let may god curse idiot choose even account transactions affect access make good application first implement stupid selection methods	Negative	1	1	0
Google Play Store	0438565b-c822-4312-8726-fb0cb92b7ef6	The application is not working at all.	Saleh Alamri	##########			2	ar	us		3	ar	application work	Negative	0	1	0
Google Play Store	a3c9215b-bc8b-4292-9636-bd8f49a18e48	The application has become very bad, it doesn't sign in.	زكريا ايوب	##########			1	ar	us		1	ar	application become bad doesnt sign	Negative	1	1	0
Google Play Store	5cf8f390-a3bc-44a3-ba00-22b7cc55edfc	Bad, bad, the application doesn't open.......... ...........................	Y	##########			0	ar	us		1	ar	bad bad application doesnt open	Negative	1	1	0
Google Play Store	f038e7c0-9f2f-4851-90f2-1481ea004e73	The application requires an update from the store, and there is nothing happening and it is not opening.	Mahmoud Mohamed	##########			0	ar	us		1	ar	application require update store nothing happen open	Negative	0	1	0
Google Play Store	74e78b9b-c501-4e45-af19-a2deb79cf7dc	Why isn't it opening??????	منى محمد	##########			0	ar	us		1	ar	isnt open	Negative	0	1	0
Google Play Store	8deca455-5c2b-468d-88dd-2acc1d355687	After the latest update, the application has become very slow and difficult to use.	سعد الرويلي	##########			0	ar	us		1	ar	late update application become slow difficult use	Negative	1	0	1
Google Play Store	1f170124-01e6-4514-929e-e3b14021e480	I don't know, but the application is not as it used to be.	قصص وروايات	##########			0	ar	us		1	ar	dont know application use	Negative	1	1	0
Google Play Store	f02c88a3-8f58-44a7-82c1-0d846137d9e7	Beautiful	أسماعيل القحاش	##########			0	ar	us		5	ar	beautiful	Positive	0	0	0
Google Play Store	507ea11b-cfa6-4228-89cf-6e145c0ca783	Very bad application	ابو صالح	##########			0	ar	us		1	ar	bad application	Negative	1	0	0
Google Play Store	68ec15cb-2a7c-4a7d-b882-caf2d0f0cec1	The application did not work.	Abo Faisal	##########			0	ar	us		5	ar	application work	Negative	0	1	0
Google Play Store	8756458b-43a9-4f27-ade7-9cf2eed3ce4f	Very good	نزار قايد	##########			0	ar	us		5	ar	good	Positive	0	0	0
Google Play Store	aac2d5b1-10df-45fe-8101-95e0da42a8b5	Excellent program	شركة لتسربات والعوزال	##########			0	ar	us		5	ar	excellent program	Positive	0	0	0
Google Play Store	e2caf706-aa36-46f7-8bbf-24ded2611f96	Bad technical support and the application always has issues. The banking system is technologically weak.	Eng Mohammed	##########			0	ar	us		1	ar	bad technical support application always issue bank system technologically weak	Negative	1	0	0
Google Play Store	5a16a863-531c-48ee-8e5e-8385d0419517	Good	Abumgdy Assad	##########			0	ar	us		4	ar	good	Positive	0	0	0
Google Play Store	ce4259de-0b50-4ad4-ad87-2b4b4f0ff144	Why are there two applications with the same name?	عثمان الزبيري	##########			0	ar	us		3	ar	two applications name	Neutral	1	1	0
Google Play Store	68f7b404-0ac1-4f9b-8e19-9fd7fc5ea3c9	After the update, the application has become very bad. It does not open after entering the password. You have to wait a long time for the code to appear, but it never shows up. You try again and again for more than half an hour without any use. We hope to find a solution to this problem, if there is anyone who follows and reads the customers' reviews.	Abo Rian	##########			56	ar	us		1	ar	update application become bad open enter password wait long time code appear never show try half hour without use hope find solution problem anyone follow read customers review	Negative	1	1	0
Google Play Store	4427f1a1-4228-4c4b-a30b-1761440f2d51	The application is a failure. When I try to open an online account, it says the phone number is invalid or not registered under your name. It is more than just a failure. I put my trust in God and He is the best advocate against whoever designed the program. The login process is also slow.	khalid ali	##########			0	ar	us		1	ar	application failure try open online account say phone number invalid register name failure put trust god best advocate whoever design program login process also slow	Negative	1	1	1
Google Play Store	a9f21b90-bfcb-4279-bda8-d1360b152beb	The new update is very bad, going from bad to worse.	خالد الوعل ابو عبود	##########			0	ar	us		1	ar	new update bad go bad bad	Negative	1	0	0
Google Play Store	564f56fb-4280-4bf1-a767-d1bb0b879a86	Well done Ahmad Qahl.	عبدالرحمن ال ظافر	##########			0	ar	us		5	ar	well do ahmad qahl	Positive	0	0	0
Google Play Store	e7a78be2-7482-4038-8b4f-fb60411df5ff	The application and mobile banking are the worst two services at Banque Chof Alahli, Riyadh Bank, and Al Rajhi Bank. They have mistakes, but I won't mention them. As for Inma bank, they do it intentionally in order to serve you, their loyal customer.	Nabil Alshadele	##########			0	ar	us		2	ar	application mobile bank bad two service banque chof alahli riyadh bank al rajhi bank mistake wont mention inma bank intentionally order serve loyal customer	Negative	1	1	0
Google Play Store	7c88e2d3-632c-41cc-8e8b-9d012df61aae	One of the worst applications ever in the history of humanity.	نواف المطرفي	##########			1	ar	us		1	ar	one bad applications ever history humanity	Negative	1	0	0
Google Play Store	7a7ff2d4-9164-4c37-ad0e-0a285810b768	His services are excellent and easy.	يوسف الحجري	##########			0	ar	us		5	ar	service excellent easy	Positive	0	0	0
Google Play Store	5928c604-79be-4010-a697-f3327723a396	After the new program update, it has become very slow and most of the time it does not open for me. I hope you can solve the problem.	Mohamed Fesal	##########			15	ar	us		1	ar	new program update become slow time open hope solve problem	Negative	0	0	1
Google Play Store	e14c76c2-2997-461c-a7f2-7e6cf9d9620f	Very beautiful, easy to use, and fast.	Jklh Dfgh	##########			0	ar	us		5	ar	beautiful easy use fast	Positive	0	0	0
Google Play Store	f80c6fbc-1124-483e-9def-1a55027d062d	I tried, and I entered the correct password and username, but I don't know why it didn't let me in.	Ausiov Ausiov	##########			0	ar	us		1	ar	try enter correct password username dont know didnt let	Neutral	0	1	0
Google Play Store	1c3ef14a-d16c-4984-9fe3-d48dee502daf	Excellence, creativity, and humble employees and administrators. Honestly, it is an exceptional bank.	قناة محمد صادق العميسي	##########			0	ar	us		5	ar	excellence creativity humble employees administrators honestly exceptional bank	Positive	1	0	0
Google Play Store	84c46009-4bfa-4750-99ae-727ecb9779b3	The application has been malfunctioning since yesterday and nothing is happening.	Asd Alasd	##########			1	ar	us		1	ar	application malfunction since yesterday nothing happen	Negative	0	1	0
Google Play Store	f7900a68-9cfc-4f4a-ae01-ce49e0af240d	By Allah, it is the best application and the best bank. Thank you very much 😘😘	Werty Werty	##########			0	ar	us		5	ar	allah best application best bank thank much	Positive	0	0	0
Google Play Store	ab51ac33-4e4b-42a2-b30c-b56c1090d63e	Good	nasr taher	##########			0	ar	us		5	ar	good	Positive	0	0	0
Google Play Store	2031a973-99c7-4755-9172-25094ef6ebb3	Very excellent	سعد الحربي	##########			0	ar	us		5	ar	excellent	Positive	0	0	0
Google Play Store	e76bacda-02f2-498f-a16b-621ac1971948	Excellent, very good.	lowalfl alrashedi	##########			0	ar	us		1	ar	excellent good	Positive	0	0	0
Google Play Store	36be073d-3ef5-47e4-80f6-a284150ee5ec	InshaAllah, things are good and the program is good and easy to use.	شبل اليمن	##########			0	ar	us		5	ar	inshaallah things good program good easy use	Positive	0	0	0
Google Play Store	455a6754-0e80-4788-8693-3692441e8b9e	Very weak application	محمد باب الغلا (العبيد)	##########			1	ar	us		1	ar	weak application	Negative	1	0	0
Google Play Store	8b058820-5cd9-416b-b1de-7e9177a11ae3	Good	هشام مصمم فخامه هشام خالد	##########			0	ar	us		5	ar	good	Positive	0	0	0
Google Play Store	d4824b21-f05f-4c8d-b2ec-a3dec02cef20	Very very good	ابو خالد	##########			0	ar	us		4	ar	good	Positive	0	0	0
Google Play Store	02b8de43-99a1-4017-8dd3-46b921d8035c	the worstlication and clear lack of customer care represented by the management of Al-Anmaa, and this is the application. It does not work, it takes time, and it is very stupid.	NAIF MURAYSHID	##########			0	ar	us		1	ar	worstlication clear lack customer care represent management alanmaa application work take time stupid	Negative	1	1	1
Google Play Store	ee120dc7-a138-4144-8549-c8071a34ade8	The application is crashing and isn't giving us any understanding for six hours now.	Eltayeb Ibrahim Mohamed Elmansour	##########			0	ar	us		3	ar	application crash isnt give us understand six hours	Negative	1	1	0
Google Play Store	6e79f5ea-1296-4e7c-bbcc-6d67912906fe	Please fix your app, it's not letting me log in. I don't know what's wrong with your application, but you guys are making it difficult for me.	SHAHAD AN	##########			1	ar	us		1	ar	please fix app let log dont know whats wrong application guy make difficult	Negative	1	0	0
Google Play Store	6b2b8f66-1f42-414e-926c-44f4d46b4b54	The new application is very slow. After logging in, if I click on any icon, it takes time to open. Please address this issue. Thank you very much.	ahmed almamon	##########			5	ar	us		1	ar	new application slow log click icon take time open please address issue thank much	Negative	0	1	1
Google Play Store	36c6dd1f-3582-43a5-beb7-43af3fcc9b66	Wonderful	Majed Jabir	##########			0	ar	us		5	ar	wonderful	Positive	0	0	0
Google Play Store	bee56712-d28a-4e89-ac9a-86dd7d97bc80	Very bad application.	Khaled	##########			0	ar	us		1	ar	bad application	Negative	1	0	0
Google Play Store	b0b4e980-fd9b-4790-b311-66f038456ff5	Please solve the problem of quick login because it gives me the wrong number.	Nayef Abdullah	##########			0	ar	us		1	ar	please solve problem quick login give wrong number	Negative	0	1	0
Google Play Store	b5bd1448-784e-44fa-b2a6-33fa5a81a5a2	The application does not open on mobile. It says the password is incorrect, even though the password is correct. Please solve the problem.	anees alwan	##########			30	ar	us		1	ar	application open mobile say password incorrect even though password correct please solve problem	Negative	0	1	0
Google Play Store	81e6ffdc-6802-42ff-abeb-7bec145fe4d9	Very interesting	درويش السيد	##########			0	ar	us		1	ar	interest	Positive	0	0	0
Google Play Store	674c2eaf-0ab7-4bdb-bb2f-d2bb8778bdee	The application has been hanging for a few days and it doesn't open.	ام احمد	##########			1	ar	us		3	ar	application hang days doesnt open	Negative	0	1	1
Google Play Store	526eda2f-bc66-424d-a442-ab110a8d139b	I register, enter, it tells me to input your ID, which is new.	مطهر امين	##########			0	ar	us		1	ar	register enter tell input id new	Neutral	0	1	0
Google Play Store	8a2a5046-62eb-4585-93e7-e4a0e53d886b	Masha'Allah, it is very easy with new useful options and a distinctive niceic appearance.	Mohamed Alshaer	##########			0	ar	us		5	ar	mashaallah easy new useful options distinctive niceic appearance	Positive	0	0	0
Google Play Store	8ad1fd3f-e5d3-412d-9edf-1042cdd6fd89	Suddenly, it stopped working? And what's new is that, even after I plug it in, it still doesn't work.	أروى	##########			0	ar	us		1	ar	suddenly stop work whats new even plug still doesnt work	Negative	0	1	0
Google Play Store	0d9bddf6-ee5f-4065-8a92-419293955d99	A good application, but it always hangs and especially at night, it shows an incorrect password message, even though I've entered it through my mobile, but it doesn't hang.	Omar Kashmiri	##########			0	ar	us		4	ar	good application always hang especially night show incorrect password message even though ive enter mobile doesnt hang	Negative	1	1	1
Google Play Store	67acb48a-16df-429b-823e-13cac8768b55	Clumsy and primitive.	بندر الشمري	##########			0	ar	us		1	ar	clumsy primitive	Negative	1	0	0
Google Play Store	30c3bb29-a72f-4555-a255-71600ab3013d	Duck	سعود بن عويف	##########			0	ar	us		2	ar	duck	Neutral	0	0	0
Google Play Store	de2ff591-74d8-4658-90de-1158be70f10b	There is a problem with the transfer and stopping online payment. I can't stop it.	منوعات نادره	##########			1	ar	us		1	ar	problem transfer stop online payment cant stop	Negative	0	1	0
Google Play Store	2993ee3d-c72c-45ff-9893-f2f4bc736d81	A star and a little bit later, my Android device refused to enter even the main page of the same application where I enter my login information, while on the iPhone it enters easily. What is this?!!!	عبدالله العبدالله	##########			0	ar	us		1	ar	star little bite late android device refuse enter even main page application enter login information iphone enter easily	Negative	0	1	0
Google Play Store	0fc32c5e-3387-4689-b0e3-f195f11ca7f2	Please, I updated the application and there is a problem, it won't open and it tells me to update it.	Mohamed Salem	##########			15	ar	us		2	ar	please update application problem wont open tell update	Negative	0	1	0
Google Play Store	e4f957ed-4eb1-49d5-a4eb-c5b0736ff146	Many people hang a lot and need updating.	ايمان الخيبري	##########			2	ar	us		1	ar	many people hang lot need update	Neutral	0	0	1
Google Play Store	be12979e-ce93-48a8-8310-956ccd1a4ffa	Having trouble logging in? Doubtful if the password is incorrect. Please correct and fix the application.	Layaly Ali	##########			1	ar	us		1	ar	trouble log doubtful password incorrect please correct fix application	Negative	0	1	0
Google Play Store	133473dd-de2d-4513-978d-eb9b6ddd5df1	Very very very bad	سالم التميمي	2023-07-09 07:38:00			0	ar	us		1	ar	bad	Negative	1	0	0
Google Play Store	b19c98b7-01e7-42df-a21a-b1ffffa7d1b7	Excellent, but sometimes it takes time to transfer from my account to another person's account in the app or to another person's account in a local bank.	ناصر الثاني	2023-07-09 01:15:00			0	ar	us		5	ar	excellent sometimes take time transfer account another persons account app another persons account local bank	Neutral	1	0	1
Google Play Store	0bae60d3-e481-4185-af51-7812e14037f2	Accessing the application has become impossible.	Bint abdallah	2023-07-08 00:52:00			1	ar	us		1	ar	access application become impossible	Negative	0	1	0
Google Play Store	099c127c-0298-4e38-bcaa-7315c3a7f3a0	Wonderful	الديب دا انا	##########			0	ar	us		5	ar	wonderful	Positive	0	0	0
Google Play Store	0d8c1638-9b6a-468d-b748-cb43edd7ca7a	There seems to be a problem. The application is not opening.	ابو الوليد	##########			0	ar	us		1	ar	seem problem application open	Negative	0	1	0
Google Play Store	e507353d-bd54-4609-8622-26c2fcb0e1d5	This application is not working, guys. The new one is like it, but the colors are reversed. So, where there used to be a brown color, now there is a white color, and the center color is brown. I had a problem logging into my account, so they told us that the application with the white color is the new one that the customer registers and logs in through. Any kind invitation from you is enough for …	مواطن	2023-07-07 03:59:00			0	ar	us		5	ar	application work guy new one like color reverse use brown color white color center color brown problem log account tell us application white color new one customer register log kind invitation enough us thank	Negative	1	1	0
Google Play Store	081ed3d7-e649-4eb4-8cb2-a678b22477bd	Very bad experience	ليلى الخنيني	##########			0	ar	us		1	ar	bad experience	Negative	1	0	0
Google Play Store	cd79617e-76e9-43a5-b31b-dcb063a9dd7c	May God bless you	مدين الجمالي	##########			2	ar	us		5	ar	may god bless	Positive	1	0	0
Google Play Store	94769ad2-4f27-43bb-b552-0e9c64a673f7	Excellent and easy to use. Sometimes it requests an update, but there is no update available on the website.	Farooq Al-Madani	##########			2	ar	us		5	ar	excellent easy use sometimes request update update available website	Positive	0	1	0
Google Play Store	58d4990b-1a9c-492d-b071-2428138418a9	It does not work.	Osama 0	2023-07-06 03:52:00			0	ar	us		1	ar	work	Negative	0	1	0
Google Play Store	e04108e6-7d8e-4773-bc4b-16e703d065a0	The application is frozen, it is not accepting logins.	محمد الدميني	2023-07-06 00:03:00			1	ar	us		1	ar	application freeze accept logins	Negative	0	1	1
Google Play Store	134248ad-2a80-4435-b23d-2d4302586c04	The application is good, but logging in to it is difficult and different from other banks.	Majed Basulaib	##########			1	ar	us		2	ar	application good log difficult different bank	Neutral	1	0	0
Google Play Store	7defce5e-55c4-4ebe-8a28-b5cd3cf89f9d	"I am surprised at how a major bank like Alinma has an application that feels like it's from the Stone Age! It doesn't open and has no updates! Should we go back to the old days and hold our secrets in the bank, for example?"	عبدالعزيز	##########			1	ar	us		1	ar	surprise major bank like alinma application feel like stone age doesnt open update go back old days hold secrets bank example	Negative	1	1	0
Google Play Store	589fe628-7c43-46a6-8a62-fc032e8e3ad9	Very bad and I do not recommend it because their behavior has become bad. They do not solve problems, they do not respond, they procrastinate with you, and they do not address complaints.	مصطفى ظافر	##########			1	ar	us		1	ar	bad recommend behavior become bad solve problems respond procrastinate address complaints	Negative	1	0	0
Google Play Store	32fdd170-f409-4739-a263-327b634110a9	Wonderful	أم مدى	##########			0	ar	us		5	ar	wonderful	Positive	0	0	0
Google Play Store	a95eb39d-c700-4ffb-a59b-6bdc9d7ef58c	The application is bad, it doesn't open and freezes!	Aamir M	##########			0	ar	us		1	ar	application bad doesnt open freeze	Negative	1	1	1
Google Play Store	63d899f9-08e8-4f8d-9c3e-3468aea7c2ae	"The application is terrible and you are fixing it or the banks are much better. I am surprised by the lack of attention from the bank to people's comments that have been there for a long time, but the application has been deleted."	Saleh saleh	##########			0	ar	us		1	ar	application terrible fix bank much good surprise lack attention bank people comment long time application delete	Negative	1	0	0
Google Play Store	7f10ab98-dd27-4dda-a056-8f4c85fe8351	Please improve the application.	طلال عبدالله	2023-07-03 02:53:00			0	ar	us		1	ar	please improve application	Neutral	1	0	0
Google Play Store	413f0312-0094-42e2-8c89-2fc37bb1e77d	The application does not meet the standards of Alinma Bank due to the high number of malfunctions.	MAK 1	##########			0	ar	us		1	ar	application meet standards alinma bank due high number malfunction	Negative	1	1	0
Google Play Store	878c0ef3-503b-4799-90cd-f32c4125eb24	After the new update, it is not working. Please solve the problem as I can't log in.	ابو الشوق	##########			1	ar	us		1	ar	new update work please solve problem cant log	Negative	0	1	0
Google Play Store	e3da43a7-8cd9-45b4-af99-e80ae3ce30a7	nice, I swear there are no problems.	علي الاسلمي	##########			1	ar	us		5	ar	nice swear problems	Positive	1	0	0
Google Play Store	d0b8ad1f-77f5-432e-938b-4782e8892ca7	Unfortunately, the Alinma Bank application is slow and bad, and does not meet the customer's needs. Please address this issue urgently. It doesn't make sense that everything has to be done through the application. We shouldn't have to go to the bank or visit an ATM to complete our transactions.	أبو وليد العتيبي	2023-07-02 02:50:00			2	ar	us		1	ar	unfortunately alinma bank application slow bad meet customers need please address issue urgently doesnt make sense everything do application shouldnt go bank visit atm complete transactions	Negative	1	0	1
Google Play Store	a9b80a3c-0f69-4237-9098-d7bcee72e3aa	He is very upset because he doesn't want to open the application.	assem Khader	##########			0	ar	us		1	ar	upset doesnt want open application	Negative	1	1	0
Google Play Store	94248c87-98cc-4f10-b7a4-025d98f1fbca	not satisfied	محمود السيد محمود النمر	##########			0	ar	us		1	ar	satisfy	Negative	0	0	0
Google Play Store	fc68cfa0-7abb-4c77-afee-ec825b0ad180	Very excellent.	فهد المسعدي	##########			0	ar	us		5	ar	excellent	Positive	0	0	0
Google Play Store	701e3ab7-e74e-462e-b5de-db092e8983bf	Why am I being asked to open the website if I can access your app? Your website has nothing to do with my app.	LIFE AL	##########			0	ar	us		1	ar	ask open website access app website nothing app	Negative	0	1	0
Google Play Store	b51b8851-d511-4e6a-a1e9-e9f0dd5d0f26	All services of Alinma Bank are a failure.	سعيد المالكي	##########			0	ar	us		1	ar	service alinma bank failure	Negative	1	1	0
Google Play Store	42f402d2-00bd-4811-bda9-5dab6a0cb421	Great application	god Veya	##########			0	ar	us		5	ar	great application	Positive	0	0	0
Google Play Store	2f2c4c6f-da3d-4a2d-84d6-a5729a2231cd	Easy and convenient application	Mabrok Yami	##########			0	ar	us		5	ar	easy convenient application	Positive	0	0	0
Google Play Store	a241c954-9a1f-4cab-81d2-00431f209124	Thank you, Development Bank.	عبدالشافي شمسان	##########			0	ar	us		5	ar	thank development bank	Positive	0	0	0
Google Play Store	ce56efa5-ca8f-428a-914c-58bcf3143e62	From bad to worse, I wish the login service for the app could be made easier. It's been over two months now and it hasn't opened.	SALMAN ALRAYTHI	##########			1	ar	us		1	ar	bad bad wish login service app could make easy two months hasnt open	Negative	1	1	0
Google Play Store	89c13dbc-db86-46ba-8a72-beecfc30e5be	The worst application I have dealt with.	Abbas Buamer	##########			0	ar	us		1	ar	bad application deal	Negative	1	0	0
Google Play Store	b721727a-6892-47c6-9a17-76724995233b	The application has become very slow, and it takes time to open and load.	فهد ”ابو سيف 2030“	##########			0	ar	us		2	ar	application become slow take time open load	Negative	0	1	1
Google Play Store	0fe3df04-5874-4811-b9bb-4a3d2e0bc16d	There is a problem, it does not accept entering the program and it says it needs an update, even though we have already updated it. Please respond and provide solutions.	عماد اليافعي	##########			0	ar	us		5	ar	problem accept enter program say need update even though already update please respond provide solutions	Negative	0	1	0
Google Play Store	19607a33-48af-4808-a8a1-3fda926b5035	The worst bank and the worst application.	without name	##########			0	ar	us		1	ar	bad bank bad application	Negative	1	0	0
Google Play Store	afff46e2-5fa0-4656-9bdd-254eba5af590	Very bad and asks for location every time !!!	AM -	##########			2	ar	us		1	ar	bad ask location every time	Negative	1	0	0
Google Play Store	30e8327c-7209-4560-8206-782fefc72812	Excellent application with all the services that save you the need to visit a branch.	علي العسيري	##########			3	ar	us		5	ar	excellent application service save need visit branch	Positive	0	0	0
Google Play Store	fb0a4ce5-f4ba-461b-8f62-dc605ce7f816	Very bad program.	Jekxs Jrfk56	##########			0	ar	us		5	ar	bad program	Negative	1	0	0
Google Play Store	4ad1b0ae-5591-419a-a702-4f3d7c86bf9e	Very bad after the update.	bobo g	##########			0	ar	us		1	ar	bad update	Negative	1	0	0
Google Play Store	0c7cd6c8-33cb-469d-bb1a-6d4bc9e3fe6d	Very bad, when entering the application and receiving the activation message, it is immediately kicked out of the application, and this is done through the browser application.	Ahmed Abooali	##########			2	ar	us		1	ar	bad enter application receive activation message immediately kick application do browser application	Negative	1	1	0
Google Play Store	24fa7ba7-cfb7-4e75-9eb3-8dfbc6fce8f4	The slowest and most annoying update that constantly asks to open the website 💩.	just me	##########			2	ar	us		1	ar	slow annoy update constantly ask open website	Negative	0	0	1
Google Play Store	b0c84ae0-53ef-4f33-851a-f705174b350c	Unsuccessful application. It has many complications. It is supposed to serve citizens. I hope those who rated the application with 5 stars would explain to us on what basis, so that we can benefit. God willing, I will delete my account and my family's account from your platform.	GOLD MAESTRO	##########			2	ar	us		1	ar	unsuccessful application many complications suppose serve citizens hope rat application star would explain us basis benefit god will delete account familys account platform	Negative	1	1	0
Google Play Store	dcbf4a27-eeca-4ec4-9335-646fca710241	Excellent pure	احمد طه	##########			0	ar	us		5	ar	excellent pure	Positive	0	0	0
Google Play Store	e1ef2fee-f8a0-4552-9dcd-9797773cf622	Excellent services	محمد الغزير kezeeer	##########			0	ar	us		5	ar	excellent service	Positive	0	0	0
Google Play Store	1400c7aa-35c3-4a50-888a-9ed4901084e1	Extremely frustrating, it hangs for no apparent reason, even if there is a receipt in the ATM, it is useless now.	Mohammad العتيبي	##########			0	ar	us		1	ar	extremely frustrate hang apparent reason even receipt atm useless	Negative	1	0	1
Google Play Store	0d64f282-1265-4746-a106-5790ec483e59	Very bad application, why does it refuse to open? It keeps asking for a login message, but when I enter it, it freezes for a week. So annoying!	salem Al , Qahtani	##########			1	ar	us		1	ar	bad application refuse open keep ask login message enter freeze week annoy	Negative	1	1	1
Google Play Store	ff5e242a-d27a-4abd-8aa2-10ce8352a94c	Very bad application, slow and raises blood pressure 👎👎	برق المناضح	##########			0	ar	us		1	ar	bad application slow raise blood pressure	Negative	1	0	1
Google Play Store	d3202c53-7106-4426-a9b5-bae0246bf5a0	On the day when salaries were supposed to be provided in Thul-Hijjah, the system has been down since noon on June 25th until now!!!!????	khaled abdullah	##########			0	ar	us		1	ar	day salaries suppose provide thulhijjah system since noon june th	Negative	0	0	0
Google Play Store	5a9fc03a-8831-4462-a379-787a314c4ffa	I swear to God, Alinma Bank's application is one of the worst banking applications... it hangs and doesn't open frequently. This situation happens a lot. I advise you to open another account in another bank out of necessity. I got involved with them because they are worst and couldn't fix the problem.	Iayan Layan	##########			0	ar	us		1	ar	swear god alinma bank application one bad bank applications hang doesnt open frequently situation happen lot advise open another account another bank necessity get involve bad couldnt fix problem	Negative	1	1	1
Google Play Store	0698d7ec-13b0-4dbe-a75b-dee8ffdf8ea4	From today, the program does not work.	Abdullah h	##########			0	ar	us		1	ar	today program work	Negative	0	1	0
Google Play Store	fe6530bd-9008-4fe4-9c95-1362f5b2aba6	May God bless you.	ابو عبدالعزيز	##########			0	ar	us		5	ar	may god bless	Positive	1	0	0
Google Play Store	3f5cb15c-1fbc-4013-b14c-0d11bd7fd928	This is bad. It won't open or transfer, and it keeps freezing all the time! 👎🏻👎🏻👎🏻👎🏻	فهوودي Gg1	##########			0	ar	us		1	ar	bad wont open transfer keep freeze time	Negative	1	1	1
Google Play Store	7a321cde-6b49-45ee-9571-3a0e7c2e6f16	The application crashes frequently.	Ahmed alhoury Alhoury	##########			0	ar	us		1	ar	application crash frequently	Negative	0	1	0
Google Play Store	211705c3-2499-4693-b254-415800d97eea	Very slowwwwww	محمد حجازي	##########			0	ar	us		1	ar	slowwwwww	Negative	0	0	1
Google Play Store	292d475c-32d2-413f-a0d7-3b135d97eec4	bad and very slow	abo mazen	##########			0	ar	us		1	ar	bad slow	Negative	1	0	1
Google Play Store	19619f67-5daa-41df-b204-a70039e264f8	Bad application	roomans e	##########			0	ar	us		1	ar	bad application	Negative	1	0	0
Google Play Store	4973eb96-3610-44e0-84b5-ddf6b2419de9	Bad and slow.	ابراهيم السقوفي	##########			0	ar	us		1	ar	bad slow	Negative	1	0	1
Google Play Store	91d63a00-27fc-43d2-aa7f-1de4da1e26d8	The application needs an update and fix, please have mercy on us. I've been trying to open the application for an hour and it's not working.	محمد أبو تيم	##########			2	ar	us		1	ar	application need update fix please mercy us ive try open application hour work	Negative	0	1	0
Google Play Store	cbd5a593-99e8-440d-9fb0-4bf3139d6fab	Very good	Mohammed ALNAGI	##########			0	ar	us		5	ar	good	Positive	0	0	0
Google Play Store	842002d3-e3af-4581-82ce-a012fa7c448d	He/she hangs out a lot.	saif alruwaili	##########			0	ar	us		1	ar	heshe hang lot	Neutral	0	0	1
Google Play Store	e6fea2dd-27d2-45f5-86b2-c94df02d0462	It doesn't work at all and it freezes a lot.	Wael Alharbi	##########			1	ar	us		1	ar	doesnt work freeze lot	Negative	0	1	1
Google Play Store	acb8c4b7-94e5-464b-86c4-9756bf522951	The application is very slow.	ابو فيصل	##########			0	ar	us		1	ar	application slow	Negative	0	0	1
Google Play Store	5518530f-2af3-416a-a3fb-cb5fd6ea0395	The application has stopped working.	PS Alanazi	##########			0	ar	us		1	ar	application stop work	Negative	0	1	0
Google Play Store	248eec17-9313-45dd-8b04-bcc5c2127302	After the latest update, the situation is unbearable. I am unable to log in.	Khudear Z	##########			1	ar	us		1	ar	late update situation unbearable unable log	Negative	0	1	0
Google Play Store	2569ab0b-dadf-4550-bd7a-faecdf504ad5	nice	عبوود الحوطي	##########			0	ar	us		5	ar	nice	Positive	0	0	0
Google Play Store	df9405d2-42f4-4253-b133-0e17df033d6d	Too slow in logging in, I try more than 30 times to enter the application and in order to perform a transfer or recharge, it takes at least an hour or an hour and a quarter. Whereas in Al-Ahli Bank's application, it takes 5 minutes. Try to learn from Al-Ahli Bank's application and other successful applications. This application is a failure, I withdrew all my money from it and transferred it to A…	Mahmoud Reda Eledresy	##########			0	ar	us		1	ar	slow log try time enter application order perform transfer recharge take least hour hour quarter whereas alahli bank application take minutes try learn alahli bank application successful applications application failure withdraw money transfer alahli bank	Negative	1	1	1
Google Play Store	1e16036c-d35c-4ef8-8967-ab16d686d309	The latest update is causing the application to crash. It's unbelievable that Banque Alinma has reached this level.	Redwan	##########			0	ar	us		1	ar	late update cause application crash unbelievable banque alinma reach level	Negative	0	1	0
Google Play Store	8fe9695c-2c39-42c3-9ba5-850d1090d628	I gave you a star just for the comment. The application is terrible and does not befit the bank's reputation. It doesn't open and the stupid application keeps crashing. It made me hate the bank.	فيصل المالكي	##########			0	ar	us		1	ar	give star comment application terrible befit bank reputation doesnt open stupid application keep crash make hate bank	Negative	1	1	0
Google Play Store	720721a5-939b-47e6-9a03-c94abb186947	The application is not working, so I had to resort to accessing the website through the internet browser.	ماجد العنزي	##########			0	ar	us		1	ar	application work resort access website internet browser	Negative	0	1	0
Google Play Store	8e2b3233-2366-4800-988c-7a33884aa8b4	Very slow and only opens with difficulty.	محمد صلاح	##########			3	ar	us		1	ar	slow open difficulty	Negative	0	0	1
Google Play Store	3d845977-e3c2-44f2-8bc1-006ac53e6033	The application is not working and logging in is slow, and the fast transfers are not working.	سالم	##########			1	ar	us		2	ar	application work log slow fast transfer work	Negative	0	1	1
Google Play Store	4b233d77-31b5-469f-84f7-a0fe19c80814	The application is very bad, and after the last update, it became even worse. The application does not work at all!	dark evil	##########			2	ar	us		1	ar	application bad last update become even bad application work	Negative	1	1	0
Google Play Store	d29f5009-fc64-4e17-8e06-68b57f6d0371	Very bad	عبدالمجيد الزهراني	##########			0	ar	us		1	ar	bad	Negative	1	0	0
Google Play Store	d0a8537a-ab88-4229-9a52-f1dbe923db93	The application will be very useful in implementing transfer services.	Ayman Hasan Alnuwirah	##########			0	ar	us		1	ar	application useful implement transfer service	Positive	1	1	0
Google Play Store	0f7704ce-2707-4d95-ab96-c82b36973da1	More than a week he doesn't work, very bad.	Last Lover	##########			1	ar	us		1	ar	week doesnt work bad	Negative	1	1	0
Google Play Store	dfcc4d20-6594-44d2-9809-a18ecfe2fc53	The application does not open.	mesho45 mashe	##########			0	ar	us		1	ar	application open	Neutral	0	1	0
Google Play Store	2ca3fdaf-48e8-4abe-9b90-85670d5f3253	The application is very bad, God (I swear)	حسن الشاذلي	##########			0	ar	us		1	ar	application bad god swear	Negative	1	0	0
Google Play Store	d67a7217-1beb-42ff-9450-0ebcacd4b002	Very bad and not worth a star, whether it's this application or the new application.	Waten Sh	##########			0	ar	us		1	ar	bad worth star whether application new application	Negative	1	0	0
Google Play Store	9dfff419-3def-411b-9176-be5fac14f1d3	There are two applications we talked about that are not opening since yesterday. It's not normal. Are there technical issues or are our accounts hacked? There is no clear message to explain the tension and worry. Why are there two applications in the store? Is one of them fake, so we enter our information and it gets stolen? If something like this happens, will the bank take responsibility for it…	Unknown A	##########			3	ar	us		1	ar	two applications talk open since yesterday normal technical issue account hack clear message explain tension worry two applications store one fake enter information get steal something like happen bank take responsibility two applications bank	Negative	1	1	0
Google Play Store	d3c74dd9-3799-43ae-b336-21f58416271e	When exchanging more points, there is an error in the system (email field is required).	Adel HR	##########			7	ar	us		1	ar	exchange point error system email field require	Negative	0	1	0
Google Play Store	0fb1a760-5af2-455e-995d-75cef846e4aa	I converted 250 riyals and I received the transfer number, but when I went to the banks, they said the tellers were not available.	محمد علي	##########			0	ar	us		1	ar	convert riyals receive transfer number go bank say tellers available	Neutral	0	1	0
Google Play Store	af8c1ca5-8b66-48d5-9635-81fff9731a93	Very bad	أبو أسامة الخالدي	##########			0	ar	us		1	ar	bad	Negative	1	0	0
Google Play Store	9ea79886-445c-42cc-a7ff-8409501ab3ae	The best application and the best available services... For those who struggle with using the program... Clean your phone from heavy load with an excellent application.	لمسة العشاق	##########			1	ar	us		5	ar	best application best available service struggle use program clean phone heavy load excellent application	Positive	0	0	1
Google Play Store	d472668d-f768-407d-9640-a34aa6536e2f	The application is cancelled. There is a new version available in the store.	Khatam Alharithi	##########			0	ar	us		1	ar	application cancel new version available store	Negative	0	1	0
Google Play Store	048137e7-39df-4fb4-88bd-524fca82d3ef	Their recent actions are rubbish.	ابو محمد الحسني	##########			0	ar	us		1	ar	recent action rubbish	Negative	1	0	0
Google Play Store	7320c613-29bb-4b46-a3ae-84458c2a8d45	The application has been bad for a week, and when I try to enter the application, it rejects me and shows a sign to update the application. I couldn't find an update. What is the solution? This is really a problem, seriously.	Mnahy aljnaby	##########			0	ar	us		1	ar	application bad week try enter application reject show sign update application couldnt find update solution really problem seriously	Negative	1	1	0
Google Play Store	5d5f701d-abb9-4d22-b4a1-e502b443ab76	Entering the application and making an internal transfer, then exiting, and when I try to purchase something online, the withdrawal process never happens. It says, "You have not logged out of the application." This is a constant problem that I face.	ياسر الحربي	##########			2	ar	us		1	ar	enter application make internal transfer exit try purchase something online withdrawal process never happen say log application constant problem face	Negative	0	1	0
Google Play Store	86dfb436-32b1-41ce-9c38-058ace6b3da4	Unfortunately, it doesn't want to work properly on the mobile phone.	KHALED ELSHAHAT	##########			0	ar	us		1	ar	unfortunately doesnt want work properly mobile phone	Negative	0	1	0
Google Play Store	4365ecd2-c40c-4198-8137-676c9398ec89	The application is not suitable for banking services, very weak and not good, heavy, and always has a malfunction. Please review that.	عبدالله العياف	##########			0	ar	us		2	ar	application suitable bank service weak good heavy always malfunction please review	Negative	1	0	1
Google Play Store	67172d07-491a-45fa-999a-914e77959489	Unfortunately, something sad.	هَمَّام	##########			0	ar	us		1	ar	unfortunately something sad	Negative	1	0	0
Google Play Store	8e45b093-e48e-4789-9a7e-87b37d051a85	Very bad	M Badr	##########			0	ar	us		1	ar	bad	Negative	1	0	0
Google Play Store	0f74b315-6edf-415b-9845-a10ba13990f2	The most beautiful	عيسي شاهين	##########			0	ar	us		5	ar	beautiful	Positive	0	0	0
Google Play Store	d6c8599b-508f-4f9e-9955-4fae7a037e7e	Please allow us to take a screenshot of the new update. It caused a malfunction.	ابراهيم احمد قائد العريقي	##########			0	ar	us		5	ar	please allow us take screenshot new update cause malfunction	Negative	0	1	0
Google Play Store	d4e1f65e-b4d2-4421-a4e1-95af0e7fea59	The application is not working properly despite the updates.	محمد الحمدلله	##########			2	ar	us		1	ar	application work properly despite update	Negative	0	1	0
Google Play Store	2354f0ce-3635-4b15-ac75-ec37ed93dc1c	The application was excellent, but after the latest update, there is a problem.	faris Dari	##########			0	ar	us		4	ar	application excellent late update problem	Negative	1	1	0
Google Play Store	5c80c035-d0a2-4063-aff3-181b38bd809d	There is a problem with paying the outstanding bills, although they are among the activated bills in the application. Therefore, I kindly request a solution to this problem.	محمدسعيد ال وتاح البشري ابو جﻻل msaq	##########			1	ar	us		1	ar	problem pay outstanding bill although among activate bill application therefore kindly request solution problem	Negative	0	1	0
Google Play Store	41f840ad-1be4-4a1b-9387-6e73e96a21d7	The application is very bad.	او وتاكوو	##########			0	ar	us		1	ar	application bad	Negative	1	0	0
Google Play Store	c7a61bb3-b347-4621-a195-bc17146a4fa6	Under experiment	ايو معزة	##########			0	ar	us		5	ar	experiment	Neutral	0	1	0
Google Play Store	ca43c95d-c1b7-469d-8b08-343efda75553	An outdated application and a backward bank from the Stone Age.	Mohammad Hezian	##########			1	ar	us		1	ar	outdated application backward bank stone age	Negative	1	0	0
Google Play Store	005b8961-7962-47e2-952d-a304bb564e1d	Very bad.	فائز علي	##########			0	ar	us		1	ar	bad	Negative	1	0	0
Google Play Store	0d44a1a8-5cf4-437d-a80f-08395956fbeb	The app does not open and I deleted it and installed it again, but the same problem persists for a month.	Maan Al-Rajhi	2023-06-09 09:25:00			1	ar	us		1	ar	app open delete instal problem persist month	Negative	0	1	0
Google Play Store	b7b30cd2-d95d-4d5a-bb36-c68f2db15471	"The best and most competent bank is Al-Ameelah in terms of all services. I wish you success and prosperity. Aim high."	El El	##########			0	ar	us		4	ar	best competent bank alameelah term service wish success prosperity aim high	Positive	0	0	0
Google Play Store	30b6736d-0490-4d7b-aa71-da33b56b82a6	Bank Alinma is the best bank.	صالح الحربي المحترم	##########			0	ar	us		5	ar	bank alinma best bank	Positive	0	0	0
Google Play Store	90b4da68-5bf9-4647-a947-e7a066247119	Why don't you try the new version once it works fine? Delete the old version, as now neither the old nor the new application works properly. A bank like Alinma is unable to develop the application.	Ryds agt	##########			0	ar	us		1	ar	dont try new version work fine delete old version neither old new application work properly bank like alinma unable develop application	Negative	0	1	0
Google Play Store	bb81974e-4341-4a36-8913-66370bcdf721	A primitive application, you all are repulsive.	Soufiane Elazhari	##########			0	ar	us		1	ar	primitive application repulsive	Negative	1	0	1
Google Play Store	298fe930-4c7a-4e12-8a21-6b459378f96d	Excellent	سعيد محمد (السلمي)	2023-06-06 03:45:00			0	ar	us		5	ar	excellent	Positive	0	0	0
Google Play Store	e54e4350-a937-4a1c-915b-52d94edc82d7	The application doesn't know what it's doing; there is a stage where it works perfectly, and there is a stage that makes you hate anything related to electronic financial management. I hope that the application management improves the quality and efficiency.	سليمان الجابري ال يوسف	##########			0	ar	us		1	ar	application doesnt know stage work perfectly stage make hate anything relate electronic financial management hope application management improve quality efficiency	Negative	1	1	0
Google Play Store	d690d4cd-d0e1-45de-82df-bbfeb3927947	What's wrong with the application? It doesn't open. We hope for a response from the support team.	Loly	##########			0	ar	us		2	ar	whats wrong application doesnt open hope response support team	Negative	0	1	0
Google Play Store	8aabc22d-d6c7-4c81-a07f-9b97e3749f9f	Very bad	فاروق الصبري	##########			0	ar	us		1	ar	bad	Negative	1	0	0
Google Play Store	a9d1fadb-6cea-4d50-8b9f-2fbd338e0719	The application "Sii" is really bad. If there was a rating less than one star, I would have given it. It never opens, and I regret dealing with this application and the bank. Even the responsible people for the application and those in charge do not care to fix or identify the problem. Even these reviews have no impact.	Hoyam Omer	2023-06-05 09:43:00			0	ar	us		1	ar	application sii really bad rat less one star would give never open regret deal application bank even responsible people application charge care fix identify problem even review impact	Negative	1	0	0
Google Play Store	dc78c003-ee76-447b-84c4-cd7db0f2d2b8	Excellent very much	ماجد التميمي	##########			0	ar	us		5	ar	excellent much	Positive	0	0	0
Google Play Store	09250f01-d149-4230-858d-345128801803	I have been unable to access my account for a while now. I enter all the information and receive the verification message, but then it immediately logs me out of the account!	عبدالرحمن الحطامي	##########			1	ar	us		1	ar	unable access account enter information receive verification message immediately log account	Negative	0	1	0
Google Play Store	4bdc890e-7bbd-4542-8363-9b40720e018d	Login is very slow and takes a long time, and many times login is only successful after several attempts.	Abu Ibrahim	##########			122	ar	us		1	ar	login slow take long time many time login successful several attempt	Negative	0	0	1
Google Play Store	6e65a1aa-60a8-43c5-88f5-c44eeb2e15e0	The application freezes and does not open at all.	Hammad Zaki	2023-06-04 08:41:00			0	ar	us		1	ar	application freeze open	Negative	0	1	1
Google Play Store	3a39a7b5-3b70-4aba-b358-3585eda87d26	Beautiful	خالد الزهراني	2023-06-04 03:33:00			0	ar	us		5	ar	beautiful	Positive	0	0	0
Google Play Store	98094a31-b0a5-4a63-83f3-efe1f385b4cd	Excellent very very much.	Hamza Ziout	##########			0	ar	us		5	ar	excellent much	Positive	0	0	0
Google Play Store	2a13bd6a-146c-438f-b3ba-bf6b4acc44e7	"I request to disable the location tracking feature as it invades my privacy."	Abdulrhman Man	##########			0	ar	us		1	ar	request disable location track feature invade privacy	Negative	1	1	0
Google Play Store	412bb5bd-48a8-43c7-bd9c-0e358b5d7ae8	The application is boring, whenever I enter a mobile number, it says it is not registered with an ID. How stupid, it's frustrating.	Deemh Alomran	##########			0	ar	us		1	ar	application bore whenever enter mobile number say register id stupid frustrate	Negative	1	1	0
Google Play Store	6d0f229c-908b-475d-b078-26144be8b274	After the latest update, it started freezing and not opening. We hope that the problem will be resolved.	مجاهد A	##########			0	ar	us		1	ar	late update start freeze open hope problem resolve	Negative	0	0	1
Google Play Store	88572b60-2f28-4e19-9505-91fdf61584a8	"I am facing a problem accessing the application. Please provide a quick solution now."	مصعب الطيب	2023-06-01 08:39:00			3	ar	us		1	ar	face problem access application please provide quick solution	Negative	0	1	0
Google Play Store	358a567f-1476-419b-b164-ce41b4db8b6f	The application was updated to the latest version, but it still has difficulty logging in.	صالح حامد	2023-06-01 07:42:00			2	ar	us		3	ar	application update late version still difficulty log	Negative	0	0	0
Google Play Store	60daf518-ea79-49cf-a7b0-98f8cff9195c	Excellent very much.	ALI MOHAMMED	##########			0	ar	us		5	ar	excellent much	Positive	0	0	0
Google Play Store	4c96d38e-554b-4fda-88bc-b394eed66640	We have reached 2024, and the problem of access and registration issues remains. It's strange, honestly.	medo alyami	##########			0	ar	us		1	ar	reach problem access registration issue remain strange honestly	Negative	1	1	0
Google Play Store	735d8184-fd58-461b-98e2-0a1903ecb185	After the new update, it is not opening for me for three days, and I am trying to open it.	ابو عرفات	##########			0	ar	us		1	ar	new update open three days try open	Negative	0	1	0
Google Play Store	12d21bc4-9b85-4e2d-937b-5ed0c7e4ae5c	Thank you.	عبد الحكيم البخيتي	##########			0	ar	us		5	ar	thank	Positive	0	0	0
Google Play Store	b70d9099-8705-4600-9a69-1a41a4a17d49	Beautiful	بن جديد حسام	##########			0	ar	us		4	ar	beautiful	Positive	0	0	0
Google Play Store	28bd4653-4b5c-45e8-888e-0015d2d61a40	Logging into the application takes a very long time. It's the worstlication 😒😒👎	Radwan Alfaqee	##########			0	ar	us		1	ar	log application take long time worstlication	Negative	0	0	1
Google Play Store	35e8af02-a400-47cf-ad87-b60e40999e39	The Inmaa app is one of the worst banking apps I have come across. The activation code either never arrives or arrives very late, making it impossible to benefit from it. It went from being a promising app to a dark and dismal present.	MRSaad9ff	##########			16	ar	us		1	ar	inmaa app one bad bank apps come across activation code either never arrive arrive late make impossible benefit go promise app dark dismal present	Negative	1	1	0
Google Play Store	f0a6d25b-17a4-4f13-9763-8bbb21873afd	Thank you.	جني الاول	##########			1	ar	us		5	ar	thank	Positive	0	0	0
Google Play Store	bc297b91-211a-4b45-a0fc-4bdc598f6484	Very bad, and lots of problems.	محمد اللزام	##########			0	ar	us		1	ar	bad lot problems	Negative	1	0	0
Google Play Store	bd053279-f76c-4b2f-8689-540c2367bec4	Excellent, we hope from you to innovate and develop the new technology.	‪ABUSAOUD “ABUSAOUD1991” ABUSAOUD‬‏	##########			0	ar	us		5	ar	excellent hope innovate develop new technology	Positive	1	0	0
Google Play Store	2b9e4598-424b-445e-9c8d-d8d89adbfb9d	There will be difficulty in logging in.	النور مصطفي المنير	##########			0	ar	us		1	ar	difficulty log	Neutral	0	0	0
Google Play Store	2eca7f60-52b4-433b-baa7-1f5478cfb173	The application is more than excellent. You don't need to enter a lot of passwords. It's very easy and well-organized in appearance.	جوهره الشهري	##########			4	ar	us		5	ar	application excellent dont need enter lot passwords easy wellorganized appearance	Positive	1	0	0
Google Play Store	c14acc39-6288-4df4-a380-45355a789acc	Very nice	عبدالناصر نعمان	##########			0	ar	us		5	ar	nice	Positive	0	0	0
Google Play Store	3d458b63-b602-4a37-bbbf-f4e9ba32ab4b	Very, very bad application	Rrrr Udri	##########			0	ar	us		1	ar	bad application	Negative	1	0	0
Google Play Store	f729f792-49d4-4d09-9438-92f0c827fed7	The application "Naim Fil Asal" and its services do not compare to the rest of the banks, please try to keep up with the world, for God's sake.	سعيد الزهراني	##########			0	ar	us		1	ar	application naim fil asal service compare rest bank please try keep world gods sake	Negative	1	0	0
Google Play Store	5032774f-b65a-44be-bab5-2e8bcdf1ad1e	Update, update, update! I heard if you call, they'll respond * But there is no response for those who call.	saad 20020	##########			3	ar	us		1	ar	update update update hear call theyll respond response call	Neutral	0	1	0
Google Play Store	59b7df4f-fd85-40fe-8982-22e856302999	Something surprising is the badness of this app at a time when everything is advanced. It's a very bad app, and it's frustrating, I swear.	جمجم الليل	##########			4	ar	us		1	ar	something surprise badness app time everything advance bad app frustrate swear	Negative	1	0	1
Google Play Store	1d3c64ff-adae-42e4-b69e-ac8aac9c305f	Excellent, and I hope you can add the ability to transfer the available balance in the stock portfolio to the current account.	Sami Albokhari	##########			5	ar	us		5	ar	excellent hope add ability transfer available balance stock portfolio current account	Positive	1	1	0
Google Play Store	6e519d30-ca7e-489d-a7ef-86fa0d9d645c	Okay	محمد المالكي {قناة وادي المجاز الثانيه}	##########			0	ar	us		5	ar	okay	Positive	0	0	0
Google Play Store	cb48f5dc-aef0-4d1b-98d8-aace82e72da9	Because it didn't work for me, I tried it before yesterday until today and there was no benefit.	ام وتين الغامدي	##########			1	ar	us		1	ar	didnt work try yesterday today benefit	Negative	0	1	0
Google Play Store	b82a0d81-ebb7-4c1d-b68f-f04c9c8b9572	The application does not open and we receive the activation code late after the expiration of the time period. Please solve the problem as soon as possible.	منصور العشاوي	##########			4	ar	us		4	ar	application open receive activation code late expiration time period please solve problem soon possible	Negative	0	1	0
Google Play Store	68b47848-a6a9-491e-a0c5-9e02a8c4c776	He suddenly hangs up.	نجو حنت	##########			0	ar	us		5	ar	suddenly hang	Neutral	0	0	1
Google Play Store	8a327ad1-83d4-40a4-a212-d9df76c3d0bf	I am facing a problem logging in to C-Agenda.	حسن hasan	##########			0	ar	us		1	ar	face problem log cagenda	Negative	0	1	0
Google Play Store	46d88838-e971-428a-bba5-9cab9163d7ac	bad Application 👎	Ali Ali2	##########			0	ar	us		1	ar	bad application	Negative	1	0	0
Google Play Store	ef5ef79d-b258-48e2-b96f-73c567d44db7	The application is not opening after the latest update.	شاكر شاكر العواضي العواضي	##########			0	ar	us		1	ar	application open late update	Negative	0	1	0
Google Play Store	0babde88-ade8-4e7c-a4b9-e09d4edac8f7	hjjhj	عبدالله سعيد	##########			0	ar	us		5	ar	hjjhj	Neutral	0	0	0
Google Play Store	f1951383-a3b0-42a1-9639-b15e39d138d0	The application version number (1.0.19) is heavy and logging in is difficult. The old version was better.	Bashab Like	##########			0	ar	us		1	ar	application version number heavy log difficult old version good	Negative	1	0	1
Google Play Store	15111294-6e08-42bf-af6e-c47f33c96e56	The application has been deleted because of the latest update. It takes a long time to open and most of the time it doesn't open. Find a solution for it, otherwise everyone will end up deleting the application.	Azzam Alfahd	##########			4	ar	us		1	ar	application delete late update take long time open time doesnt open find solution otherwise everyone end delete application	Negative	0	1	1
Google Play Store	ec404251-058b-4cec-a6cc-c45734222b18	The application hangs and delays, what's the reason?	ابو فهد	##########			0	ar	us		1	ar	application hang delay whats reason	Negative	0	0	1
Google Play Store	e0a4d208-1810-40e0-81d5-019f21e30b5e	Whoever logs in says "done". Your registration is for another channel and the application is closed. How does it mean entering my account? 😕	جاسم الخميس /	##########			1	ar	us		1	ar	whoever log say do registration another channel application close mean enter account	Negative	0	1	0
Google Play Store	afa41b11-9f0d-47b8-9624-0ce8fdf97a00	Thank you very much. To be honest, your customer service is excellent and you have credibility and transparency. However, I have a problem. I changed my mobile phone and I am not receiving login confirmation messages or transfer messages from the application on my phone. I hope you can help me register my phone on the system so that I can receive the confirmation numbers. 🙏	رائد الخليدي	##########			1	ar	us		2	ar	thank much honest customer service excellent credibility transparency however problem change mobile phone receive login confirmation message transfer message application phone hope help register phone system receive confirmation number	Positive	0	0	0
Google Play Store	633fade3-0c96-45ba-b34f-665c465f6524	The latest update is bad..... it crashes.	bader albader	##########			0	ar	us		1	ar	late update bad crash	Negative	1	1	0
Google Play Store	593c13f1-e96a-448d-a3c1-c0dbd8e2b429	The application requires an update, but it is updating very slowly.	سامي الخليل	##########			0	ar	us		1	ar	application require update update slowly	Neutral	0	0	1
Google Play Store	4f146801-2877-499f-8c57-759da2e27e87	Throw the application in the nearest trash bin. The star is only for writing comments, nothing else. It doesn't deserve a star, it deserves trash.	FS 07	##########			1	ar	us		1	ar	throw application near trash bin star write comment nothing else doesnt deserve star deserve trash	Negative	1	1	0
Google Play Store	c809c24f-375e-4010-9aae-56e2effcd86e	After the latest update, the application became worse. It doesn't open, and it's really exhausting.	احمد الزيادي	##########			1	ar	us		5	ar	late update application become bad doesnt open really exhaust	Negative	1	1	0
Google Play Store	84157e5b-2275-4b27-97b8-be96d30e4172	Excellent program	محمود حسين	##########			0	ar	us		5	ar	excellent program	Positive	0	0	0
Google Play Store	59ca4141-8884-42f6-8417-62cf634c3d16	Al Inma Bank withdrew one thousand riyals from my account and swallowed it through its ATMs. It has been over a month since I filed complaints and requested a review of the surveillance footage to identify the person responsible, but I haven't found any solution and they took my money.	Mhmad Ali Albhbah	##########			0	ar	us		1	ar	al inma bank withdraw one thousand riyals account swallow atms month since file complaints request review surveillance footage identify person responsible havent find solution take money	Negative	0	1	0
Google Play Store	1cbc6abb-d308-42f8-aa39-00e59f4df610	The application is not working and is requesting a very bad update.	Mhmd Elbasher	##########			2	ar	us		1	ar	application work request bad update	Negative	1	1	0
Google Play Store	e13e4476-8ba1-4a38-b488-69fe00bb971e	After the recent updates, logging in has become very difficult and takes a long time... and most of the time it doesn't open at all... I request that this issue be addressed.	Hamada Ahmed	##########			138	ar	us		1	ar	recent update log become difficult take long time time doesnt open request issue address	Negative	1	0	1
Google Play Store	dac08c74-8b5d-4363-8daa-7891d409f54d	After the update, it became bad.	HOMASZ SAHMDAD	##########			0	ar	us		1	ar	update become bad	Negative	1	0	0
Google Play Store	de9e8995-6573-4d3c-acde-766a09888d3c	Excellent or perfect.	Abdala Salah	##########			0	ar	us		5	ar	excellent perfect	Positive	0	0	0
Google Play Store	b1c3921c-cb65-468e-a1f2-9239e8399dde	What's the story? It's becoming very bad. Every time I want to transfer, the activation code does not come until I log out of the application and log back in. Then when I try to transfer, it doesn't accept the code. I have to try 20 times or leave it for a day and then it works. Our solution to the problem.	Shadi Altawil	##########			2	ar	us		3	ar	whats story become bad every time want transfer activation code come log application log back try transfer doesnt accept code try time leave day work solution problem	Negative	1	1	0
Google Play Store	04c7237a-65b3-468f-a8b1-a55f3f8d6c09	The website is slow and it takes time to log in. You need to make several attempts for it to open.	لولي الرولي	##########			3	ar	us		1	ar	website slow take time log need make several attempt open	Negative	0	0	1
Google Play Store	e2d62af4-c1d8-42cc-b167-ef5ebe593b74	At first, it was good, but the latest update is extremely bad.	وحيد القحطانى	##########			0	ar	us		1	ar	first good late update extremely bad	Negative	1	0	0
Google Play Store	6475daea-468e-47bc-a062-faec92e1f665	The application does not open. Please solve the problem as soon as possible.	abo amar H.y.N	##########			0	ar	us		1	ar	application open please solve problem soon possible	Negative	0	1	0
Google Play Store	79c0f69b-a0b4-4041-9300-6c39a158bc47	Wonderful	علي عروم	##########			0	ar	us		5	ar	wonderful	Positive	0	0	0
Google Play Store	c9095762-a91f-4788-a7a7-25da5ea689b6	Excellent very much.	محمد معلم	##########			0	ar	us		5	ar	excellent much	Positive	0	0	0
Google Play Store	5a465712-6971-407f-b3f6-5ef749ab3af9	I liked that.	عيسى يحى ال قريعه	##########			0	ar	us		4	ar	like	Positive	0	0	0
Google Play Store	270f1a6c-5641-433b-9638-1450d3024782	The program asks for an account number and password. What should we do and which account does it require to register? The program needs to be modified.	abuya7o@hotmail.com Mo	##########			0	ar	us		1	ar	program ask account number password account require register program need modify	Neutral	1	0	0
Google Play Store	678361a2-8858-436f-8304-007ee634de71	Very bad, ineffective, and heavy application. I advise those with chronic illnesses to stay away from it.	AHMED N	##########			0	ar	us		1	ar	bad ineffective heavy application advise chronic illnesses stay away	Negative	1	0	1
Google Play Store	1e303346-27e3-488f-918a-6ac6788b2b3f	Why every time I try to log in it says the username is currently blocked, and when I create a new account, it asks me to change the password. Please contact me.	مجنونك الحارثي	##########			0	ar	us		1	ar	every time try log say username currently block create new account ask change password please contact	Negative	0	1	0
Google Play Store	68770ff5-a974-4134-8b62-17998c2a79ad	May Allah be my support, you guys have really annoyed me on the first day I attend an external training course. I couldn't access the old and new application, and I have been trying to contact the bank for hours at different times. It cost me 7 riyals per minute. Even the employees don't have the authority, they can only provide pointless responses without any authority. It's the worst bank.	Morning mate The information	##########			0	ar	us		1	ar	may allah support guy really annoy first day attend external train course couldnt access old new application try contact bank hours different time cost riyals per minute even employees dont authority provide pointless responses without authority bad bank	Negative	1	1	0
Google Play Store	ee42c4a2-9406-48e6-a5dd-d054ee8547b5	The activation code arrives very late. The time expires and the code doesn't arrive! I hope the issue gets resolved!	ساره التميمي	##########			4	ar	us		1	ar	activation code arrive late time expire code doesnt arrive hope issue get resolve	Negative	0	1	0
Google Play Store	30a33a5d-2617-4eac-bda8-4bd132340374	Non-patients must enter using the website.	البخيت ابو خالد	##########			0	ar	us		1	ar	nonpatients must enter use website	Neutral	0	1	0
Google Play Store	cbfb4a7f-7c9e-4f62-ad9b-cc566bf0c791	The bank is very bad and the application is worse.	شهيل AS	##########			0	ar	us		1	ar	bank bad application bad	Negative	1	0	0
Google Play Store	eb6b1e3d-98b1-4f5c-8fa4-b129f7eb8fd3	From bad to worse.	محمد عساف	2023-05-08 08:54:00			0	ar	us		1	ar	bad bad	Negative	1	0	0
Google Play Store	32a20f40-fb90-48c8-8eca-08d52c7d6395	The application does not allow entry. Please update.	عوض باوهال	2023-05-08 08:41:00			0	ar	us		1	ar	application allow entry please update	Negative	0	1	0
Google Play Store	425ae047-49d1-4195-b785-0a76ecc8d229	Al-Inma Bank is the best bank to deal with. The bank's design is wonderful and creates a sense of comfort. The employees welcome you with smiling faces. The application is fast, but recently it has become very slow.	سليمان	##########			1	ar	us		4	ar	alinma bank best bank deal bank design wonderful create sense comfort employees welcome smile face application fast recently become slow	Positive	1	0	1
Google Play Store	a93c7500-7230-49e8-ab50-6f68d15cfd3e	The application hangs a lot and says "the application has stopped working" but there is no update for it.	Ssss Hh	##########			0	ar	us		5	ar	application hang lot say application stop work update	Negative	0	1	1
Google Play Store	bae6b63b-9bc2-4b97-91cd-1919224f0382	Very bad, now it is asking for the website to login.	M A	2023-05-06 01:38:00			0	ar	us		1	ar	bad ask website login	Negative	1	1	0
Google Play Store	ae916743-4859-4821-b1a9-b215ce27b72a	The necessity of displaying the account statement... It has been included as a service for 16 riyals.	kooora 360	##########			0	ar	us		1	ar	necessity display account statement include service riyals	Neutral	1	0	0
Google Play Store	61eb63df-84a4-4fdf-a965-29f6a3c0dea9	The application is very bad, and dozens of times we update and exit without any benefit, and the application returns us to a page that is not useful, but rather a complication that is unnecessary. We hope for a reconsideration, as other banks do not have this procedure... Some customers may be forced to transfer their accounts to other banks.	mohamedsa101@gmail.com aa11002200	##########			4	ar	us		1	ar	application bad dozens time update exit without benefit application return us page useful rather complication unnecessary hope reconsideration bank procedure customers may force transfer account bank	Negative	1	1	0
Google Play Store	6b02ab62-a23f-4655-9580-87f264822f08	I don't know why every update makes things worse. Find a solution, man.	F Lord	##########			0	ar	us		1	ar	dont know every update make things bad find solution man	Negative	1	0	0
Google Play Store	c8db891b-91e5-4916-ab05-d6fbd69add94	Very bad, the application does not open quickly. Please fix the application.	Shop Shop	##########			0	ar	us		1	ar	bad application open quickly please fix application	Negative	1	1	0
Google Play Store	71e7905d-5e73-40df-8de9-21302c210385	We try the usage.	سعيد الزايدي	##########			0	ar	us		1	ar	try usage	Neutral	0	1	0
Google Play Store	25757048-84c0-401c-8500-bb1aeb4b19a1	Wonderful application	Ahmad Balkhair	##########			0	ar	us		5	ar	wonderful application	Positive	0	0	0
Google Play Store	e3bc3d7c-282f-4b48-8f88-220bab3e8d9a	Bad experience	يحيى هروبي	2023-05-01 09:11:00			0	ar	us		1	ar	bad experience	Negative	1	0	0
Google Play Store	b83f3226-ad03-4ee3-9dfa-1f791d54b2bd	The number zero is not available in the fast pass.	mustafa aleran	##########			0	ar	us		4	ar	number zero available fast pass	Neutral	0	0	0
Google Play Store	597d46de-a702-4b6d-a15b-5b66426ca50c	He always hangs and the fast login is no longer fast.	يوسف ال هماس	##########			5	ar	us		2	ar	always hang fast login long fast	Negative	0	0	1
Google Play Store	0c2443e3-ce5e-446a-a145-7b0e0d345362	The application was working perfectly fine, but suddenly it stopped opening and all the attempts ended in failure!! Is there a problem and what is the solution?	Mr. Bashosh	##########			0	ar	us		5	ar	application work perfectly fine suddenly stop open attempt end failure problem solution	Negative	0	1	0
Google Play Store	2c021fec-881e-4cf6-af11-941639ce0641	One of the worst banking experiences I had was when I tried to open an account and the process failed four times and was not completed. Oh God, please protect me... If this is the beginning, then the endings are even worse.	فيصل القصير	##########			0	ar	us		1	ar	one bad bank experience try open account process fail four time complete oh god please protect begin endings even bad	Negative	1	1	0
Google Play Store	1e6da65a-a277-4657-a1dd-c2c64e381fcc	Asking for an update, but there is no update in the Play Store and I can't log in.	الطير المهاجر	##########			0	ar	us		1	ar	ask update update play store cant log	Negative	0	1	0
Google Play Store	f7656649-7e8a-438a-9b17-8da580ff8ca1	A terrible experience, it will not be repeated.	Yousef Alshamleh	##########			0	ar	us		1	ar	terrible experience repeat	Negative	1	0	0
Google Play Store	a6fd49cd-e270-45a9-9857-fbb43d15ceba	Excellent and useful application	محمد احمد	##########			0	ar	us		5	ar	excellent useful application	Positive	0	0	0
Google Play Store	8c1167c7-774d-4bd4-8fff-047892271f3c	The application has become very very bad after the latest update. Why was the screenshot feature disabled?	Hassan Qatary	##########			5	ar	us		1	ar	application become bad late update screenshot feature disable	Negative	1	1	0
Google Play Store	5c614343-e29d-4d79-9ae8-5ff589db311f	Very bad.. I didn't benefit from it at all. It refused to open even though I deleted it and downloaded it multiple times, and I see that many people are suffering from the same problem.	Manar MG	##########			0	ar	us		1	ar	bad didnt benefit refuse open even though delete download multiple time see many people suffer problem	Negative	1	1	0
Google Play Store	bb386a5c-f311-43b6-813f-1a6e6f90fe3b	Excellent	عبد الرحيم	##########			0	ar	us		5	ar	excellent	Positive	0	0	0
Google Play Store	88141445-2b10-410a-9ce1-917cc2233185	The application does not open, why?	Horror and Action	##########			0	ar	us		3	ar	application open	Negative	0	1	0
Google Play Store	469d1a41-8ca5-4166-b42b-fbc1c9933030	Very nice and smooth services.	Bakry abdalazeem	##########			0	ar	us		4	ar	nice smooth service	Positive	0	0	0
Google Play Store	99e663c5-72b4-4a63-b3eb-a999562fb49d	Every time there is an update, it becomes slower and worse. Please improve the app for the better.	Mohamad Nasser	##########			0	ar	us		1	ar	every time update become slow bad please improve app good	Negative	1	0	1
Google Play Store	c226cc2e-0344-45c0-97d1-18042586eb30	Thank you, Al-Anmaa is an excellent application.	حسين بلال	##########			0	ar	us		5	ar	thank alanmaa excellent application	Positive	0	0	0
Google Play Store	bde659e5-e51b-438a-aaeb-5a87052d9078	Verification messages do not arrive until after a certain period of time.	ابراهيم سنبل	##########			0	ar	us		1	ar	verification message arrive certain period time	Neutral	0	1	0
Google Play Store	0e43e87a-ceaa-4219-8d0f-b9ec2b22a187	Slow and tired	وليد الخالدي	##########			0	ar	us		2	ar	slow tire	Negative	0	0	1
Google Play Store	711ab57c-127a-417d-9d8d-113e28b77f21	After the latest update, it refuses to login to the account. Please fix the problem.	ابوعمر	##########			0	ar	us		1	ar	late update refuse login account please fix problem	Negative	0	1	0
Google Play Store	a48fcc08-aaf9-4190-aec5-977b1e3ce08c	Very slow in sending the verification code 😡👎	البحر العميق	##########			0	ar	us		1	ar	slow send verification code	Negative	0	0	1
Google Play Store	c5d99748-8fff-48fe-94c5-1de74f0d1248	All beneficiaries must be added again.	فيصل الهذلي	##########			0	ar	us		1	ar	beneficiaries must add	Neutral	0	1	0
Google Play Store	0c2a22c4-1497-4869-9716-a25791a6aeac	The application has been freezing every time I log into my account, it takes time.	Abd alkarim aleubaydi	##########			0	ar	us		1	ar	application freeze every time log account take time	Negative	0	0	1
Google Play Store	63ebc63f-ec2f-49e7-bc22-9507730b3263	The application is very bad and very slow. The verification code always delays, and the new application is worse and worse.	Muhamed ALHUSSAIN	##########			0	ar	us		1	ar	application bad slow verification code always delay new application bad bad	Negative	1	0	1
Google Play Store	4accdcb4-4b5f-4544-9496-282a2c933d3d	The application is annoying because it has not been opening for me for a while.	ابو عمر	##########			0	ar	us		1	ar	application annoy open	Negative	1	1	0
Google Play Store	568a58fe-70bc-46da-8755-2195486c7154	Good	ماجد محمد البوني	##########			0	ar	us		5	ar	good	Positive	0	0	0
Google Play Store	c11a1e31-934f-46c1-9628-270a5dec2682	It doesn't work, and every time it says VPN network is not available.	المتنبي علي	##########			0	ar	us		1	ar	doesnt work every time say vpn network available	Negative	0	1	0
Google Play Store	6f6fe24b-2156-4aca-bb69-5021586ad8b2	The new update is bad, you have to enable the location or there is no quick login feature.	abdulelah bahjat	##########			7	ar	us		1	ar	new update bad enable location quick login feature	Negative	1	1	0
Google Play Store	463a1b7d-d415-4788-8512-8484da9ea021	He is requesting an update although I have already updated it and there are no updates available in the store.	عبد السلام عبدالله	##########			0	ar	us		2	ar	request update although already update update available store	Neutral	0	1	0
Google Play Store	9111f6cb-cc62-436b-bb98-3e8fc80a9289	He keeps telling me to download the new version, delete and reinstall again. He tells me to download the new version.	سفيان رحيمي	##########			0	ar	us		1	ar	keep tell download new version delete reinstall tell download new version	Neutral	0	1	0
Google Play Store	a741decf-3451-4f50-ade6-11fb4a246f06	Bad, it freezes and doesn't open.	Msh Anzy	##########			0	ar	us		1	ar	bad freeze doesnt open	Negative	1	1	1
Google Play Store	aa151da7-3011-423d-bc55-56fd7551b4c8	Bad application and it has started to hang on the device. The new update is not successful.	mm MG	##########			0	ar	us		1	ar	bad application start hang device new update successful	Negative	1	0	1
Google Play Store	23472d7b-6610-4215-be0b-8677a727d102	Becoming too heavy.	محمد احمد	##########			0	ar	us		1	ar	become heavy	Negative	0	0	1
Google Play Store	8eb25fd8-5bcc-4d1c-80a9-dc7291b26461	It's done.	صلاح عبد الحق ال الشمسي	##########			0	ar	us		5	ar	do	Neutral	0	1	0
Google Play Store	cd8eaa23-3698-44d7-ae05-9a9781f20cb3	"I am a failure by all standards. After completing the data, I received a message to check the bank."	ابويوسف	##########			0	ar	us		1	ar	failure standards complete data receive message check bank	Negative	0	1	0
Google Play Store	365c959c-0895-446f-bbca-bf57d6824c96	After the update, it's very bad. It does not accept fingerprints or quick access. When you try to activate it, an error message appears and it does not open. Most of the services do not work, and sometimes the application exits on its own and asks for location to be specified. Even if you don't specify it, it won't work.	aboody elewa	##########			5	ar	us		1	ar	update bad accept fingerprint quick access try activate error message appear open service work sometimes application exit ask location specify even dont specify wont work	Negative	1	1	0
Google Play Store	9617ad41-917f-4ad7-b1d6-f40d8882955b	After the recent updates, it has become extremely bad and the application does not open. Please look into the matter and fix it as soon as possible, improve the quality, and choose the update carefully. This does not befit your esteemed customers.	سعادة الغامدي	##########			148	ar	us		1	ar	recent update become extremely bad application open please look matter fix soon possible improve quality choose update carefully befit esteem customers	Negative	1	1	0
Google Play Store	a36d2c6c-04c0-4c44-b931-af66d31b8ab9	The application is very, very bad. It embarrassed me and disrupted my interests.	Abeer Arss	##########			0	ar	us		1	ar	application bad embarrass disrupt interest	Negative	1	0	0
Google Play Store	b2f15e46-dc2d-4757-9d54-a3461974398b	Bad application and the bank is the worst bank in the history of banks.	ابورند الشهري	##########			0	ar	us		1	ar	bad application bank bad bank history bank	Negative	1	0	0
Google Play Store	d578173c-573e-4a15-89e9-84ac043d9302	The application freezes when opened.	dy _2016	##########			0	ar	us		1	ar	application freeze open	Negative	0	1	1
Google Play Store	d3254b18-6e01-46d3-a5ab-d4db18156878	One of the best banks in Saudi Arabia with distinctive services.	عبدالرحمن عبدالله	##########			0	ar	us		5	ar	one best bank saudi arabia distinctive service	Positive	0	0	0
Google Play Store	7d64d69e-148f-4161-a5ec-8fb5749e6fe2	Why do you give points when the application is useless and doesn't open? Keep it to yourselves and satisfy yourselves with it.	شاعر مستقل	##########			0	ar	us		1	ar	give point application useless doesnt open keep satisfy	Negative	1	1	0
Google Play Store	7dab8810-e267-40a5-8722-c034d67e2737	The website is not working despite updating the information.	ابكر سليمان	##########			0	ar	us		1	ar	website work despite update information	Negative	0	1	0
Google Play Store	c0bdc70c-b39d-4998-8bdd-eb3ceb0ebad4	I kindly request to fix the application, it is very slow and not working.	يوسف منير	##########			0	ar	us		1	ar	kindly request fix application slow work	Negative	0	1	1
Google Play Store	2e88b2a5-236f-4240-b772-54748da44114	Very bad.	medo albadry	##########			0	ar	us		1	ar	bad	Negative	1	0	0
Google Play Store	07a2b5b4-ff45-4ca4-98a5-d02e167b92d1	Excellent	ثنيان الدوسري	##########			0	ar	us		5	ar	excellent	Positive	0	0	0
Google Play Store	84f27500-e3a3-4e52-b177-cf23c46ec5d0	The application has been hanging for about 15 days. It constantly asks for an update, but there is no update available for it, honestly. Initially, it was working very well, but now it keeps freezing all the time.	Ali Dabour	##########			1	ar	us		2	ar	application hang days constantly ask update update available honestly initially work well keep freeze time	Negative	0	1	1
Google Play Store	bea7e5dd-8ee0-477c-843f-c64a460c3a35	The application has become very slow and exhausting. The service was fine before, but the latest updates are not good.	عيسى الكدهي	##########			8	ar	us		2	ar	application become slow exhaust service fine late update good	Negative	1	0	1
Google Play Store	a0271f41-b430-44bc-9d64-1a220bdcc1b2	He always demands an update and prevents me from logging in, even though there is no update available for him.	Jawaher A	##########			0	ar	us		1	ar	always demand update prevent log even though update available	Negative	0	1	0
Google Play Store	66d8e527-b1ca-40fd-8b7f-8a71bff12d34	The application is bad with the latest update and very very slow.	Khaled albarode	##########			0	ar	us		1	ar	application bad late update slow	Negative	1	0	1
Google Play Store	d43bb69c-ac3c-4bdd-8c6d-8d3e007ac7e6	Very beautiful.	Mohamed Abosena	##########			0	ar	us		1	ar	beautiful	Positive	0	0	0
Google Play Store	db148689-3e69-46df-919e-171cfdef7277	In the beginning, the application was very good and didn't need frequent updates. Now, the application deserves only one star for the review.	NiSR Aldin	##########			0	ar	us		1	ar	begin application good didnt need frequent update application deserve one star review	Positive	1	0	0
Google Play Store	c272c434-6075-4523-9d0b-76b4f4fc5615	The application is very bad, I wish there was a quick solution.	Ahmed Abo El Makarem	##########			0	ar	us		1	ar	application bad wish quick solution	Negative	1	0	0
Google Play Store	34fbf085-e0d3-4c69-8135-8add4e1451ea	Unfortunately, the application is a failure. We enter the application and it doesn't allow us to transfer any amount or make purchases from major websites. It was a big mistake for me to open an account with Alinma Bank.	فاطمه الصالح	##########			0	ar	us		1	ar	unfortunately application failure enter application doesnt allow us transfer amount make purchase major websites big mistake open account alinma bank	Negative	1	1	0
Google Play Store	85a02239-88a4-4238-923b-4ee15665bc67	A bad application is requesting an update, although it is already up-to-date, and it does not open.	نايف نهار	##########			0	ar	us		1	ar	bad application request update although already uptodate open	Negative	1	1	0
Google Play Store	9d9cb2a6-406a-4ded-b7d0-c77906eb292c	Excellent and classy treatment	Ali Nasser	##########			0	ar	us		5	ar	excellent classy treatment	Positive	0	0	0
Google Play Store	c0f2debf-4880-41b3-8ff7-340ef5fc5631	I don't know why the issue of the app's comments is not being addressed. It would be more appropriate for the application to be handled by someone competent for that. We are tired of repeating this bad experience.	2023-02-02 00:00:00	##########			0	ar	us		1	ar	dont know issue apps comment address would appropriate application handle someone competent tire repeat bad experience	Negative	1	1	0
Google Play Store	7b829128-aea4-4bd2-a7e1-5861bff42299	This update is so bad. What's the use of the appearance if the application keeps crashing?	Mariam gh	##########			0	ar	us		1	ar	update bad whats use appearance application keep crash	Negative	1	1	0
Google Play Store	55cf5771-c0c7-4688-91dd-8e621fe6281a	There is a problem with the latest update where you cannot take photos within the app and cannot send or receive prepaid transactions.	Haroon Alhsga	##########			5	ar	us		3	ar	problem late update take photos within app send receive prepay transactions	Negative	0	1	0
Google Play Store	451ad004-8733-4c27-9dcc-77df78f1b2b7	Vulgar / Crappy	Ahmed Medo	##########			0	ar	us		1	ar	vulgar crappy	Neutral	1	0	0
Google Play Store	a66b79e7-83ef-4f44-98e9-21a83cbaec9d	After the recent update, it became necessary for the application to be allowed access to the location. I have no problem closing my account at the bank in order to preserve my privacy because my privacy is more valuable than a bank account.	ابراهيم ميمني	##########			2	ar	us		1	ar	recent update become necessary application allow access location problem close account bank order preserve privacy privacy valuable bank account	Neutral	1	1	0
Google Play Store	4bd26931-084e-4304-b678-1e2d3ae4a269	Find a specialized software company that can solve the problems in the new update.	The Drak	##########			0	ar	us		1	ar	find specialize software company solve problems new update	Neutral	0	1	0
Google Play Store	96ec6c74-a972-4296-af27-e13f9d88cf2a	Very nice	محمد لطفي محمد علي	##########			0	ar	us		1	ar	nice	Positive	0	0	0
Google Play Store	af2f3d82-a075-49d1-a451-66e6acd81c91	Good	Fawaz Alazwah	##########			0	ar	us		5	ar	good	Positive	0	0	0
Google Play Store	799a23dc-44f3-4bff-9c57-2784e2aff581	We trusted you, expecting excellence in everything, but what happened to the application? It has become extremely slow.	ريدان البعداني	##########			0	ar	us		1	ar	trust expect excellence everything happen application become extremely slow	Negative	1	0	1
Google Play Store	46de9b49-cc4d-4a7a-a8df-ae0d4f3cb158	Recently, the operations do not appear.	Ma n3	##########			0	ar	us		2	ar	recently operations appear	Neutral	0	1	0
Google Play Store	de19d24b-beed-4fd6-9c94-45e70f845f12	Unfortunately, the update is a big obstacle as it keeps asking me.	Sweet Recycle	##########			0	ar	us		1	ar	unfortunately update big obstacle keep ask	Negative	1	1	0
Google Play Store	522946ad-9084-496b-bb4e-f1f042753b82	Ali	علي علي عراش	##########			0	ar	us		5	ar	ali	Neutral	0	0	0
Google Play Store	830e4132-a2e4-4449-a161-b6cbc7c067bc	Not good. I tried to open an online account, but it says I have a previous account, even though I don't have a NCB bank card for the first time. I tried opening an account with Al Rajhi Bank in five minutes, they opened the account. The same happened with Al Ahli Bank, they opened the account in five minutes without any obstacles. I have been trying with NCB for a week, and they haven't responded…	يوسف الحمودي	##########			1	ar	us		5	ar	good try open online account say previous account even though dont ncb bank card first time try open account al rajhi bank five minutes open account happen al ahli bank open account five minutes without obstacles try ncb week havent respond sorry inconvenience	Negative	1	1	0
Google Play Store	0157457f-8e05-40bc-b3d4-03b1a27e35d3	Very bad	عمر جوزان	##########			0	ar	us		1	ar	bad	Negative	1	0	0
Google Play Store	91e6e2f4-76d0-4e2b-852c-96b46dc969c8	The application has become bad under the pretext of increased security and verification procedures, and it does not open unless the location is activated. Since when does security only occur by violating the customer's privacy? Why is activating the location a requirement to use the bank's services? What is the benefit of authenticating devices? Finally, every private institution must understand …	No M	##########			2	ar	us		1	ar	application become bad pretext increase security verification procedures open unless location activate since security occur violate customers privacy activate location requirement use bank service benefit authenticate devices finally every private institution must understand relationship customer business relationship exchange interest government entity impose forcefully plenty bank one withdraw …	Negative	1	1	0
Google Play Store	5e084b2f-9737-4b4a-b5f4-b55c54e4918b	nicettttt	أنور حمودعبدالله محمد	##########			0	ar	us		5	ar	nicettttt	Positive	0	0	0
Google Play Store	dc1a705d-913f-487a-af95-bdd2a500cbbb	Honestly, the new application does not work as expected. The previous version was better. It used to work for me, but after the update, it doesn't open at all.	أبوإبراهيم 777	##########			6	ar	us		1	ar	honestly new application work expect previous version good use work update doesnt open	Negative	0	1	0
Google Play Store	3bc8a421-f338-48d2-9d97-63b7a266dd14	"I will give it one star just to make fun of this application. It's the most demanding application for updates and the most cracked program that makes the programmers who designed it look like they live in a box. Their so-called expert is probably on vacation and they are clueless 😂😂."	عبدالله الغامدي	##########			6	ar	us		1	ar	give one star make fun application demand application update crack program make programmers design look like live box socalled expert probably vacation clueless	Negative	1	0	0
Google Play Store	db816900-592d-4010-b0e3-32032c4d5f0d	The application has become bad after updating.	انا فخم	##########			0	ar	us		1	ar	application become bad update	Negative	1	0	0
Google Play Store	24b9ed8f-cc9f-4c04-a8a5-f3848a50a532	The application has become very bad after the latest update, it is very slow and doesn't open at all, unfortunately.	ابو محمد البلوشي	2023-04-09 08:56:00			0	ar	us		1	ar	application become bad late update slow doesnt open unfortunately	Negative	1	1	1
Google Play Store	6f750e8a-3fb2-4481-86ff-2a2bd1a10b86	The best bank in Saudi Arabia.	احمد	2023-04-08 09:20:00			0	ar	us		5	ar	best bank saudi arabia	Positive	0	0	0
Google Play Store	13094a1d-4a2c-4b92-9b80-52fb9795ccfd	Recently, he has been hesitating.	ندى عمار	2023-04-08 06:26:00			0	ar	us		1	ar	recently hesitate	Neutral	0	0	0
Google Play Store	57593d5e-8d81-4a2a-b504-8f8940dbe943	It has become very bad to the extreme.	Arabian Hero	2023-04-08 04:40:00			0	ar	us		1	ar	become bad extreme	Negative	1	0	0
Google Play Store	d6e55ecd-a14d-4c30-840d-411e6d23e801	Worse than bad.	عبدالله (ابو رنيم)	##########			0	ar	us		1	ar	bad bad	Negative	1	0	0
Google Play Store	496e83cb-ad88-4edd-94fc-17e3417d0ba2	Very wonderful	ابو اسر	##########			0	ar	us		5	ar	wonderful	Positive	0	0	0
Google Play Store	7a7de1f8-b0df-4cc7-9166-16b061627ab3	With the latest program update, we have seen significant improvements.	محمد الهندي	##########			0	ar	us		5	ar	late program update see significant improvements	Positive	0	1	0
Google Play Store	c01fe8af-2728-452a-8bb3-e05ee1f3c7b9	It's really bad after the latest update, it used to be the best bank but unfortunately now there are delays and disruptions.	hgoos s	2023-04-07 08:22:00			0	ar	us		1	ar	really bad late update use best bank unfortunately delay disruptions	Negative	1	0	1
Google Play Store	0c4fa733-de93-4c02-905b-37eef4a96d6f	Excellent and useful.	Ahmed Alkhaldi	2023-04-07 00:44:00			0	ar	us		5	ar	excellent useful	Positive	0	0	0
Google Play Store	c1257d12-6cdd-48a6-9f80-c53b850998d6	Beautiful.	احمد حوتان	##########			0	ar	us		5	ar	beautiful	Positive	0	0	0
Google Play Store	03c43684-6e27-48e8-af18-fef10462bc14	The transfer is pending and not working.	بن عيسى البدراني	##########			0	ar	us		1	ar	transfer pending work	Negative	0	1	0
Google Play Store	ae9ee057-b30b-42a5-88ed-abbc664d8168	The idea doesn't apply outside Saudi Arabia. You must receive a call for proper authentication. You will receive a message.	Sameer Alqhamdi	##########			0	ar	us		1	ar	idea doesnt apply outside saudi arabia must receive call proper authentication receive message	Neutral	0	1	0
Google Play Store	2d35a70b-30fe-4857-b81b-96bd257eeb91	Good, but the currency service does not befit the bank's name at all.	M. IBRAHIMALSHIKH alashraf	2023-04-06 05:05:00			0	ar	us		5	ar	good currency service befit bank name	Negative	0	0	0
Google Play Store	37787780-88e6-4b89-b38c-212b8f2323db	Every time I try to transfer money to someone, it turns out that the balance is not available for transfer.	سند ايكو السعدي عدن	##########			0	ar	us		5	ar	every time try transfer money someone turn balance available transfer	Negative	0	1	0
Google Play Store	fd0fcb60-7a43-45a3-9080-62de6d74a3b4	MashAllah, everything is fine.	عبدالصمد ابو زياد	##########			0	ar	us		5	ar	mashallah everything fine	Positive	0	0	0
Google Play Store	981f778e-88d7-47ad-b55e-6191b7546973	The application is bad and the bank is even worse. Every time it asks me to update the application even though it is already updated. It also does not provide some other services, such as providing a verified IBAN number. Literally a bad experience and it will not be repeated.	ذهيبه المالكي	##########			126	ar	us		1	ar	application bad bank even bad every time ask update application even though already update also provide service provide verify iban number literally bad experience repeat	Negative	1	1	0
Google Play Store	89c41c09-4d81-4345-aaa4-a724b57336b7	I am a failure, I cannot log in from my mobile phone unless my spirit exits.	salah saleh	2023-04-04 09:27:00			0	ar	us		1	ar	failure log mobile phone unless spirit exit	Negative	0	1	0
Google Play Store	48533f59-d941-446b-91af-a31f74c733ad	The application has become very bad after being the best application. It freezes a lot and takes a long time to load me and even longer to receive a login code or transfer code message. We request urgent assistance in finding solutions.	غاده محمد	2023-04-04 03:59:00			32	ar	us		1	ar	application become bad best application freeze lot take long time load even long receive login code transfer code message request urgent assistance find solutions	Negative	1	0	1
Google Play Store	ad325f76-10af-4a29-b63e-b8cfbd6707ce	There is a problem with the application.	عايش حسن	2023-04-04 03:42:00			0	ar	us		5	ar	problem application	Negative	0	1	0
Google Play Store	5cc7b593-c6ed-40c4-b014-a051376223e4	Filthiest banking service	ابوتركي صويلح	##########			0	ar	us		1	ar	filthy bank service	Negative	1	0	0
Google Play Store	5152f012-835a-41ea-b8f9-2b7a3c164321	Very, very, very excellent.	سالم ابو مرفت الهزازي	##########			0	ar	us		5	ar	excellent	Positive	0	0	0
Google Play Store	84dd9569-b04e-4d1c-afc8-ade166d90d43	Excellent, keep up the good work.	عدنان عبدالله	##########			0	ar	us		4	ar	excellent keep good work	Positive	0	0	0
Google Play Store	2ee2e2de-5442-4868-b5d7-3ac676ed971b	Excellent very very much	عبد الرؤف محمد	##########			0	ar	us		5	ar	excellent much	Positive	0	0	0
Google Play Store	78bcfd1c-d0c2-4748-bf8f-44043f6588af	Please look at the application. I am having trouble logging in.	شريفة محمد	##########			0	ar	us		1	ar	please look application trouble log	Negative	0	1	0
Google Play Store	691aa513-7321-4800-a88f-0b163608c6d4	Excellent	ابو قاسم	##########			0	ar	us		5	ar	excellent	Positive	0	0	0
Google Play Store	be4dbada-74c8-4475-8af2-f34137f30565	It hangs and doesn't open quickly.	Hilema Aseri	2023-04-02 09:10:00			0	ar	us		1	ar	hang doesnt open quickly	Negative	0	1	1
Google Play Store	97a366db-ebb1-40da-a4a6-2216d954ab48	The application "Waqf Nazlo" released the new application. This is it. Done.	ابوريان القدسي	##########			0	ar	us		1	ar	application waqf nazlo release new application do	Neutral	0	1	0
Google Play Store	ce12625e-9985-44ec-b304-7d626e94e924	The recent update of the Raddi application is not functioning and it keeps asking for my location to open the application. What is this?	Ma H	##########			0	ar	us		1	ar	recent update raddi application function keep ask location open application	Negative	0	1	0
Google Play Store	5e139ee0-263d-4e84-a52d-9208c7c5a52d	Excellent	محمد حكمي	##########			0	ar	us		5	ar	excellent	Positive	0	0	0
Google Play Store	7ebbde02-a27a-49f2-85fa-f67a071b60f8	We thank the bank for the improvement of the application compared to the previous version, and the update is great. We are looking forward to the best from Alinma Bank, the leading bank.👍🏻	Uthman	2023-04-01 02:29:00			0	ar	us		4	ar	thank bank improvement application compare previous version update great look forward best alinma bank lead bank	Positive	0	0	0
Google Play Store	01621249-077e-47c3-8c03-4a62e6db1dfa	Honestly, the situation has been bad for over a month and there is no response at all. We need to address the issue or switch to Al Rajhi Bank for better and more sophisticated services and dealings.	مصعب العتيق	##########			0	ar	us		1	ar	honestly situation bad month response need address issue switch al rajhi bank good sophisticate service dealings	Negative	1	0	0
Google Play Store	9ca3bac1-bf81-45f9-aa5c-ac9ccadd4e36	Thank you very much, even a small "thank you" is well deserved by you.	الماس الشمري	##########			1	ar	us		5	ar	thank much even small thank well deserve	Positive	1	0	0
Google Play Store	d4913729-c79e-463c-9ed4-03602c605da1	Rotten	ابو محمد	##########			0	ar	us		1	ar	rotten	Negative	1	0	0
Google Play Store	cad43041-5503-49cc-bc9c-486745161212	Development is always at the peak.	mohamed abdalgadir abdalgadir	##########			0	ar	us		5	ar	development always peak	Positive	1	0	0
Google Play Store	63c0f088-346a-4580-a182-537a669bf2b1	The application is not working at all. After selecting the location, a quick solution must be found for this problem. The application is bad, I don't know why it changed.	عاشق الزمن الجميل	##########			5	ar	us		1	ar	application work select location quick solution must find problem application bad dont know change	Negative	1	1	0
Google Play Store	66616ad4-b645-4ee6-a682-4753a02b7057	The application is very slow and has login problems. I hope you make the login process easier.	Mak Oy0626	##########			0	ar	us		3	ar	application slow login problems hope make login process easy	Negative	1	1	1
Google Play Store	b77fa92f-2905-4182-bbc0-7c62a745ad53	The program is not working properly.	نور الحرمين	##########			0	ar	us		1	ar	program work properly	Negative	0	1	0
Google Play Store	8f6dabf2-9ff5-4126-983e-3ac8cba0afd3	Under experiment.	اديب الاديب	##########			0	ar	us		4	ar	experiment	Neutral	0	1	0
Google Play Store	2638ffa5-11d8-473f-a1d8-5a322a4cea32	The application no longer opens after the update!	Zainab	##########			0	ar	us		1	ar	application long open update	Negative	0	1	0
Google Play Store	bdf198c0-ca2e-4a18-90fc-3251d6e15ce0	The program is excellent and serves well, but it is a bit complicated.	فهد الهويمل	##########			1	ar	us		5	ar	program excellent serve well bite complicate	Positive	1	0	0
Google Play Store	6d885322-b970-40b1-bc03-e6a7f2659729	The application is very bad. I have to switch to another bank because of the application.	محمد سعيد ال عيد	##########			0	ar	us		1	ar	application bad switch another bank application	Negative	1	0	0
Google Play Store	513afcf0-4f49-4a8a-83bf-81ca6dd4b13d	The application has started to freeze and is not functioning well for fast operations, and it has become boring.	bandr dooore	##########			0	ar	us		1	ar	application start freeze function well fast operations become bore	Negative	1	0	1
Google Play Store	1854fde2-7277-40a5-8e7c-343b73776a79	The application is not working when logging in.	أنور يوسف	##########			2	ar	us		1	ar	application work log	Negative	0	1	0
Google Play Store	091c88ad-24b3-471b-b106-184d6f0f2028	Excellent The best application in the Kingdom Alinma Bank	Amjad 5	##########			0	ar	us		5	ar	excellent best application kingdom alinma bank	Positive	0	0	0
Google Play Store	25785e5d-65c3-498a-a280-2513188033cf	You were unable to solve the problem of the street name being unchangeable by the customer. The least thing you can do is make it adjustable. You don't have anyone to review technical issues and follow up on solving them. The management works for the routine, not for development.	samm a	##########			4	ar	us		1	ar	unable solve problem street name unchangeable customer least thing make adjustable dont anyone review technical issue follow solve management work routine development	Negative	1	1	0
Google Play Store	23b4bf15-0cd8-4762-acc3-84085a5a5a43	When I updated the program, it does not work.	Rafeeq أجمل اغنيه سمعتها بحياتي Al Marshed	##########			0	ar	us		1	ar	update program work	Negative	0	1	0
Google Play Store	c1d3ff1f-8aee-4585-8a4d-3644987afce3	A wonderful experience for the ease in using the application.	ام حسام	##########			1	ar	us		5	ar	wonderful experience ease use application	Positive	0	0	0
Google Play Store	bd38c171-1848-4942-95a0-9ce026723ce0	Excellent	Atti القريقري الحربي	##########			0	ar	us		5	ar	excellent	Positive	0	0	0
Google Play Store	b9526558-9350-490f-9632-67613caa32cd	The best program with excellent accuracy and reliability, I highly recommend using it.	محمد صالح	##########			0	ar	us		5	ar	best program excellent accuracy reliability highly recommend use	Positive	0	0	0
Google Play Store	b6b23cc5-0f41-46cd-a3d1-25bf343f8c88	The best bank.	عاشق الليل	##########			0	ar	us		5	ar	best bank	Positive	0	0	0
Google Play Store	9c8b792f-fe41-4219-927c-430311faa3c9	I want to open an account, but I have been trying for a week and it keeps telling me that the page is unavailable. Is there a problem with opening the account?	سيف الدين خالد حسن	##########			0	ar	us		1	ar	want open account try week keep tell page unavailable problem open account	Negative	0	1	0
Google Play Store	e5f42658-5ddd-485b-aa6b-8a33b96ca564	Very good.	Yahya Alhamzi	##########			0	ar	us		5	ar	good	Positive	0	0	0
Google Play Store	3c30d8d7-d516-4979-a714-80af70a08149	Shepherd	الولو الولوه	##########			0	ar	us		5	ar	shepherd	Neutral	1	0	0
Google Play Store	927a8ddd-dc7c-4303-b045-f8f8072c220a	Failed bank, failed rating, and a terrible experience.	Mohamed Askol	##########			0	ar	us		1	ar	fail bank fail rat terrible experience	Negative	1	0	0
Google Play Store	805d5a9e-97e0-4398-babe-e0827705ccc0	Unfortunately, it has been more than a month and it still doesn't open for me, even though it is updated. I have uninstalled and reinstalled it, but unfortunately, I am very frustrated. The website opens, but it asks to add the device as trusted every time I log in. 😖	عبدالرحمن الحارثي	##########			55	ar	us		1	ar	unfortunately month still doesnt open even though update uninstalled reinstall unfortunately frustrate website open ask add device trust every time log	Negative	1	1	0
Google Play Store	019f9882-60f6-4f08-8e3b-ab8302f2310b	With each entry, device authentication is requested, and it is the same device each time. Not all services appear.	Saleh Zaher	##########			2	ar	us		2	ar	entry device authentication request device time service appear	Neutral	0	1	0
Google Play Store	c1de218e-f502-4b7e-924a-690d17c257ed	Alinma Bank is one of the best banks in the region. They are keen on satisfying everyone and are trustworthy.	المطلق العلي الطوراني	##########			0	ar	us		5	ar	alinma bank one best bank region keen satisfy everyone trustworthy	Positive	0	0	0
Google Play Store	e1e41f8d-2435-4641-9f6d-085c876188f5	Wonderful	hamad misbah	##########			0	ar	us		5	ar	wonderful	Positive	0	0	0
Google Play Store	a3891f2c-61bf-4850-928f-bc15233b0a7c	bad	محمد العمري	##########			0	ar	us		1	ar	bad	Negative	1	0	0
Google Play Store	e3ca903e-d91a-4ac3-87ef-19d0563fa051	One of the best online banking transactions	ابواميرة الراصد	##########			0	ar	us		5	ar	one best online bank transactions	Positive	0	0	0
Google Play Store	f94524f7-686a-4268-af75-d735ecae1f9d	A good application, but it freezes.	Am nwaf -	##########			0	ar	us		2	ar	good application freeze	Negative	1	0	1
Google Play Store	3e6dfda7-19f3-443e-b813-5612d61e5967	Great/Excellent/Wonderful.	Sakura Sakuko	##########			0	ar	us		5	ar	greatexcellentwonderful	Positive	0	0	0
Google Play Store	77f77eaa-fb40-4519-9e67-fa2d0b163aa2	After the latest update, when entering the application, it became very bad. What kind of update is this? 😡 Now it prevents taking screenshots within the application, so you can't capture the transaction number or anything else.	عمار العودي	##########			0	ar	us		2	ar	late update enter application become bad kind update prevent take screenshots within application cant capture transaction number anything else	Negative	1	1	0
Google Play Store	acc36917-81bb-40f8-b9ec-4840a16a743b	Bad application and requests unnecessary permissions ... Why do you ask for access to the customers' location?!	Abu_5aled	##########			0	ar	us		1	ar	bad application request unnecessary permissions ask access customers location	Negative	1	0	0
Google Play Store	6fcee214-b41d-4cfb-b74c-901449175f60	Dealing with the bank is great, you feel smoothness when dealing with the application.	Nasser Alasheed	##########			0	ar	us		5	ar	deal bank great feel smoothness deal application	Positive	0	0	0
Google Play Store	9a4c9164-afc2-43d1-8a95-0060bc9e4b94	The latest update is terrible. It is delayed when logging in.	الهاوي السبيعي	##########			0	ar	us		1	ar	late update terrible delay log	Negative	1	0	1
Google Play Store	e65cddf4-07fb-4e74-ab58-90d81bf33abb	The worst application among all banks.	عبدالرحمن السعدي	##########			0	ar	us		1	ar	bad application among bank	Negative	1	0	0
Google Play Store	de2741bb-4d76-437b-9ffe-bcbeabc8296b	Excellent	Abu Fraes	##########			0	ar	us		5	ar	excellent	Positive	0	0	0
Google Play Store	7395037e-9d47-410a-b5c5-456d5e4af577	The application is very nice, but there is a small problem in the latest version. I don't know how to enter quickly through the advertisement. I hope the problem is resolved. Thank you.	ابوبكر باري	##########			4	ar	us		5	ar	application nice small problem late version dont know enter quickly advertisement hope problem resolve thank	Negative	1	1	0
Google Play Store	43dfd243-3fa5-4620-ae8b-fd0c1321ed6f	More than a year of suffering when sending the code .. A very significant delay.	Glbeen	##########			2	ar	us		1	ar	year suffer send code significant delay	Negative	1	0	1
Google Play Store	41fc307e-db99-45fd-b77a-ead39cee5567	Help opening the application.	سعد الدين نجار	##########			0	ar	us		5	ar	help open application	Neutral	0	1	0
Google Play Store	130b5549-2377-4d60-96b9-c54f77cffe29	Thanks and appreciation for you.	سامي الغامدي	##########			0	ar	us		5	ar	thank appreciation	Positive	0	0	0
Google Play Store	c167bb69-0422-4308-a109-a28c18518f11	His problem is that he wants to run the website on his device, but the program does not open and he cannot access the application at all until the website is activated.	ادريس الحزمي	##########			2	ar	us		1	ar	problem want run website device program open access application website activate	Negative	0	1	0
Google Play Store	5adec093-4dea-4bc1-9694-acfca970ad67	Excellent and wonderful	Othman Alhakami	##########			0	ar	us		5	ar	excellent wonderful	Positive	0	0	0
Google Play Store	a1cd6c58-5b84-49b2-9e0b-ebb7d1b15fdb	The latest update is terrible, now accessing the website is mandatory to enter the application. Learn a little from Al Rajhi.	JamaL aLasadi	##########			0	ar	us		1	ar	late update terrible access website mandatory enter application learn little al rajhi	Negative	1	1	0
Google Play Store	50a44775-6a1a-49d0-bcbc-b98f9302a0b7	Excellent, but it asks me to update and the application is already updated.	Tamer Nawaar	##########			0	ar	us		5	ar	excellent ask update application already update	Positive	1	1	0
Google Play Store	86d1830a-b1e9-4668-bc4c-b334d6016733	The application is hanging, there is a problem with the server or API.	اسامه التميمي	##########			0	ar	us		1	ar	application hang problem server api	Negative	0	1	1
Google Play Store	9c07b81d-36c9-4527-bfb1-8efa9206991b	If I could give less than one star, I would! Every time I open the application, it rushes and doesn't work, and it says there is a new update, update first :( :(	مستخدم Google	##########			9	ar	us		1	ar	could give less one star would every time open application rush doesnt work say new update update first	Negative	0	1	1
Google Play Store	b6e7ed4e-20e3-42bf-8cd2-7237f93eee9f	The application is very very bad in the login process.	محمد جديبا	##########			0	ar	us		1	ar	application bad login process	Negative	1	1	0
Google Play Store	6cf05a56-6fda-4cd0-a9cd-82b7bf27585f	Excellent	محمد الأحمري	##########			0	ar	us		5	ar	excellent	Positive	0	0	0
Google Play Store	718c3af4-fc39-4317-b429-0f76eb6b766f	It is not working, it is requesting your geographical location, and after opening it does not work.	ابوحمد ابوحمد	##########			0	ar	us		1	ar	work request geographical location open work	Negative	0	1	0
Google Play Store	05b18081-2682-4e04-a329-7fbdbd49dbe6	The garbage program does not open after the latest update.	KHALED ALHARBI	##########			0	ar	us		1	ar	garbage program open late update	Negative	0	1	0
Google Play Store	09aeb90c-9a0a-4368-b250-8bc9e8a5f1e3	Unfortunately, poor customer service.	غَــرْآم 760 ــ	##########			0	ar	us		1	ar	unfortunately poor customer service	Negative	1	0	0
Google Play Store	19089c34-8862-4e0c-821c-ee123236747b	I always suffer from a terrible login experience.	Hassan Mt	##########			0	ar	us		1	ar	always suffer terrible login experience	Negative	1	1	0
Google Play Store	e46b4cc3-c1c8-474c-b36a-ce16cd5bedf8	The application "English," how do I make it Arabic?	nars 2012	##########			0	ar	us		5	ar	application english make arabic	Neutral	1	0	0
Google Play Store	5524feba-ca3b-490b-99f1-8d012e392d9f	Excellent application	Qwertyui Jjjjkkll	##########			0	ar	us		5	ar	excellent application	Positive	0	0	0
Google Play Store	fcb3f786-e95e-4224-84c3-f3646c01d0c5	Excellent	Abdalhadi Alabdli	##########			0	ar	us		5	ar	excellent	Positive	0	0	0
Google Play Store	2e613f86-3b95-4451-8e6d-b5a91d70df08	I can't create an account, it says error. Why is this happening?	مجاهد الاسطورة	##########			0	ar	us		1	ar	cant create account say error happen	Negative	0	1	0
Google Play Store	c4928b54-885a-4f37-9402-6e50c6a4491e	"The services are excellent. I wish they would add the option to repay loans early, like Al Rajhi Bank and Al Makhalesah, through the application without the need to visit the branch. We often hear about visiting the branch."	Abdullah	##########			0	ar	us		3	ar	service excellent wish would add option repay loan early like al rajhi bank al makhalesah application without need visit branch often hear visit branch	Positive	1	1	0
Google Play Store	9b4ac7ca-443e-4750-8d38-e408e2c17c88	The website is consuming the battery every time.	حكيم زمانه	##########			3	ar	us		1	ar	website consume battery every time	Negative	1	0	0
Google Play Store	95f7d464-e6bb-43be-b6ab-9669f27ffb91	The payment system in the application has become one of the worst applications after being the best... Secondly, can anyone replace Alinma Bank's features with something better? The person who suggested this name should be held accountable 🤦‍♂️	ابو علي	##########			0	ar	us		1	ar	payment system application become one bad applications best secondly anyone replace alinma bank feature something good person suggest name hold accountable	Negative	1	0	0
Google Play Store	c3843672-0000-4844-aa95-ebebad443993	Good.	احمد بن ناصر	##########			0	ar	us		2	ar	good	Positive	0	0	0
Google Play Store	6ed2fe00-40d4-4094-9796-3a3a6b202f10	There is no interest as usual on Android, you cannot open a new account on the application.	عبدالله الشمري	##########			0	ar	us		1	ar	interest usual android open new account application	Negative	0	1	0
Google Play Store	335c1fce-9675-43af-a8bb-e58671a960ad	Rotten	ابو محمد	##########			0	ar	us		1	ar	rotten	Negative	1	0	0
Google Play Store	5539622f-ab77-4afc-9417-ef0d8106b0db	At first, it was nice and working efficiently. After the new update, it has become heavy, and logging in takes more than 10 minutes. Honestly, it's exhausting.	طموح بالمعقول	##########			0	ar	us		5	ar	first nice work efficiently new update become heavy log take minutes honestly exhaust	Negative	0	0	1
Google Play Store	7ba1810e-369f-43c6-a899-ad0fe846d2a1	Good.	حمادي المحبيس	##########			0	ar	us		5	ar	good	Positive	0	0	0
Google Play Store	71b3aca1-04a6-469c-a6fd-e65576712749	Before the update, the application was working perfectly, but now every time I try to access it, whether through quick login or regular login, it tells me that the application needs an update, and I go to the Google Play Store, but there is no update available. Don't ruin our electronic services, so you don't lose your customers.	Abbas Abo Abdulaziz	##########			4	ar	us		1	ar	update application work perfectly every time try access whether quick login regular login tell application need update go google play store update available dont ruin electronic service dont lose customers	Negative	0	1	0
Google Play Store	b0e58ed2-df65-4378-a4e2-949691696671	Beautiful.	AHMED SAAD	##########			0	ar	us		5	ar	beautiful	Positive	0	0	0
Google Play Store	187edc91-5bea-474e-a76b-a3ba0a08ff76	Download	M.H.s H.M.S	##########			0	ar	us		5	ar	download	Neutral	0	1	0
Google Play Store	f937fe4d-f70e-4ad3-b7a2-cae1b1409b46	"An unpleasant feature, I cannot take a screenshot?! Why?!"	FAROQ ALKRMMANE	##########			5	ar	us		2	ar	unpleasant feature take screenshot	Negative	1	0	0
Google Play Store	61e420ab-accf-461b-8be9-f694787b9cc2	"The service is very bad. My salary was deposited in the bank and I was supposed to receive it or pay through the card, but my residence permit has expired. They sent a message stating that if the residence is renewed, please update the data through the application. I opened the application, but it is not opening. I called them and they said to visit the branch. I went to the branch and they told…	Abdullah Salem	##########			0	ar	us		1	ar	service bad salary deposit bank suppose receive pay card residence permit expire send message state residence renew please update data application open application open call say visit branch go branch tell wait hours come cities build hours cant open application within hours anyway hours pass still hasnt open	Negative	1	1	0
Google Play Store	51dc08f9-ddd8-4dba-9bca-927cf1135eed	Masha Allah, it is a beautiful bank and even more beautiful service.	محمد عبدالله	##########			0	ar	us		5	ar	masha allah beautiful bank even beautiful service	Positive	0	0	0
Google Play Store	814ab302-9bd6-467d-b448-b30831a234e9	I couldn't open an account. What is the problem?	ابو علي ابو علي	##########			0	ar	us		1	ar	couldnt open account problem	Negative	0	1	0
Google Play Store	b18adea5-b48f-46cb-866a-e5517ed8832f	After the latest update, it started to freeze during login and takes a very long time.. I had to transfer my money to Al-Riyadh Bank until you resolve your frustrating problem.	Tariq	##########			0	ar	us		1	ar	late update start freeze login take long time transfer money alriyadh bank resolve frustrate problem	Negative	1	0	1
Google Play Store	cd2b0ad6-489f-412b-afc1-5c8ebe288ca1	The application is very bad. After enabling GPS, there is a delay in processing that causes embarrassment and interruptions in service. I will transfer my accounts to another bank so that I can enjoy better and faster services without any inconvenience. Thank you, Alinma Bank.	سليم البلوي	##########			8	ar	us		1	ar	application bad enable gps delay process cause embarrassment interruptions service transfer account another bank enjoy good fast service without inconvenience thank alinma bank	Negative	1	1	1
Google Play Store	57c448cd-fa4d-41a3-8347-305f6db31e2c	Not good.	سعد عبدالله	##########			0	ar	us		3	ar	good	Negative	0	0	0
Google Play Store	e191154e-27b1-4336-8d68-0ca40cb64701	I always face a problem logging into the Enmaa application, and it is a significant and noticeable issue. When I try to make a purchase, the transaction is rejected due to not logging out of the electronic channels, even though I have logged out multiple times. Please resolve this problem as soon as possible because it is embarrassing when transactions are declined.	T J	##########			91	ar	us		1	ar	always face problem log enmaa application significant noticeable issue try make purchase transaction reject due log electronic channel even though log multiple time please resolve problem soon possible embarrass transactions decline	Negative	1	1	0
Google Play Store	fe255315-b726-4afa-9ca9-2a01d64d31bd	Find a solution for the application freezing when logging in, even after several attempts. In cases of urgency, I want to switch to another application that opens without any issues. It's a trivial problem that should have been resolved by you.	Tabt.akabr Soos	##########			0	ar	us		1	ar	find solution application freeze log even several attempt case urgency want switch another application open without issue trivial problem resolve	Negative	0	1	1
Google Play Store	607a0373-59c9-4dbf-8070-c340b2cf5bed	The application is currently experiencing a problem. I started with attempting to transfer money through the application to another country, and when I reached the "Reason for Transfer" section, it was closed and the transfer cannot be made without providing a reason.	مشعل الدميني	##########			0	ar	us		1	ar	application currently experience problem start attempt transfer money application another country reach reason transfer section close transfer make without provide reason	Negative	0	1	0
Google Play Store	9e963d34-0596-4aec-a2f2-8f19e9bb593b	It was one of the best applications, but the latest update has become very annoying. Why do they ask for the geolocation?!!! Sometimes, when logging in, it says "please update the app" even though I have already updated it. I wish I hadn't updated it.	Abu-asmaa22 Ma	##########			1	ar	us		3	ar	one best applications late update become annoy ask geolocation sometimes log say please update app even though already update wish hadnt update	Negative	1	1	0
Google Play Store	b27078cc-e2d7-4c62-82ed-e819e111a8b8	I have provided all my data and a digital account has been opened for me for over two months. I tried to request a debit card but it was rejected. I have been to the branch a thousand times and it has been almost a month since I received any response regarding the card.	هارون الوصابي	##########			0	ar	us		1	ar	provide data digital account open two months try request debit card reject branch thousand time almost month since receive response regard card	Negative	0	1	0
Google Play Store	4aaa997c-a505-4b99-b54b-89936299b50c	Excellent	مرزوق الشمري	##########			0	ar	us		5	ar	excellent	Positive	0	0	0
Google Play Store	71ef39b9-0227-4372-a449-915889c8ad99	Wonderful	المنهج البريطاني	##########			0	ar	us		5	ar	wonderful	Positive	0	0	0
Google Play Store	15aaee24-496e-4ad8-a0fe-221b097cfa34	Marouh and Njma have increased, but they still don't open!	Exclusiv Marketer	##########			0	ar	us		1	ar	marouh njma increase still dont open	Neutral	0	1	0
Google Play Store	f1119587-def5-44b4-aa1a-57b56652a404	The application did not open?	محمد عبدالله الوجيه	##########			0	ar	us		5	ar	application open	Neutral	0	1	0
Google Play Store	246d6733-6e7b-4d51-8d86-610aedb1d0de	The application forgot the password, and I entered it and registered my required data. However, I received a notification saying, "Sorry, the system is being upgraded. Please try again later." We request assistance and problem fixing.	MOKHTAR Alhthyfi	##########			0	ar	us		1	ar	application forget password enter register require data however receive notification say sorry system upgrade please try late request assistance problem fix	Negative	0	1	0
Google Play Store	c5e543ca-a989-46c2-bc9b-579fc75046ff	An application that closes on Fridays, so if someone has transfers and commitments on Friday, it postpones them!	Msm Sss	##########			0	ar	us		1	ar	application close fridays someone transfer commitments friday postpone	Neutral	0	1	1
Google Play Store	70d37a46-aef3-4212-a9f3-7aab0fd2ff29	Honestly, I do not recommend Alinma Bank.	أم فيصل ألحكمي	2023-03-08 00:32:00			0	ar	us		1	ar	honestly recommend alinma bank	Negative	1	0	0
Google Play Store	fd30fe5a-048e-4429-b33f-c9bb167b2117	I am becoming extremely bad...	abaadi 2020	##########			0	ar	us		1	ar	become extremely bad	Negative	1	0	0
Google Play Store	cc2144a5-7c4b-4e27-9d1c-514520b862ce	The application does not open, many attempts and long waits, but it does not open.	Radwan Radwan	##########			5	ar	us		1	ar	application open many attempt long wait open	Negative	0	1	0
Google Play Store	faf7cf0f-78ae-4f05-8d45-8808c68920cf	Very very very bad. It tells you to try again, and then you discover that the transfers came out of your account. May God be sufficient for me, and He is the best disposer of affairs for those who did this.	Amaal albasher	2023-03-06 04:33:00			0	ar	us		1	ar	bad tell try discover transfer come account may god sufficient best disposer affairs	Negative	1	1	0
Google Play Store	af9c18fd-547f-434b-a5b5-a9a3815bb340	Why did you make every time I enter the application it asks me to enable location services? Please delete this feature because it is very annoying, and I hope you improve the application because it sometimes freezes. Thank you.	khalil alyamani	2023-03-06 03:53:00			2	ar	us		1	ar	make every time enter application ask enable location service please delete feature annoy hope improve application sometimes freeze thank	Negative	1	1	1
Google Play Store	f206fe3b-ab41-406d-9d15-310bfff79e1e	The easiest and most amazing thing ever is being flexible in dealing.	Malik almhdi	2023-03-06 03:15:00			1	ar	us		5	ar	easy amaze thing ever flexible deal	Positive	1	0	0
Google Play Store	56190908-d72f-4a7f-85a1-0ad08efa661d	It has been three days pending 😡😡	عيد العنزي	2023-03-06 02:40:00			0	ar	us		1	ar	three days pending	Negative	0	1	0
Google Play Store	ed038f28-bb6b-4dfb-990c-66f48d82ca55	Okay	راشد محمد	##########			0	ar	us		5	ar	okay	Positive	0	0	0
Google Play Store	f06ee72f-3a0b-49a5-91b8-89981b585f94	What he does, he enters.	Abrahmalmosa	##########			0	ar	us		5	ar	enter	Neutral	0	1	0
Google Play Store	0b7f2abe-6c08-4d08-88e1-5ae8094067b1	The best banking services application	Haitham Aljohani	##########			0	ar	us		5	ar	best bank service application	Positive	0	0	0
Google Play Store	b030e3a1-06d4-4761-aa4a-e2206ce061dc	The application does not support the Android system.	دخيل الحذيفي	##########			0	ar	us		1	ar	application support android system	Negative	0	1	0
Google Play Store	1b26d6c0-35af-4b83-98a5-8c7c57a86e92	The update is bad, the application forces you to open your GPS location in order to open with you.	Mubarak Alsahli	##########			0	ar	us		1	ar	update bad application force open gps location order open	Negative	1	1	0
Google Play Store	8311108f-e4dc-45cc-8025-45c6bb636c10	Bad	Mahmoud Awd	2023-03-05 09:51:00			0	ar	us		1	ar	bad	Neutral	1	0	0
Google Play Store	7ea3b6ef-1231-4530-a803-1ad27432774c	The application is very slow and does not open most of the time.. It used to be excellent in the past. Now, it deserves less than one star.	ali noman	##########			9	ar	us		1	ar	application slow open time use excellent past deserve less one star	Negative	1	0	1
Google Play Store	b560c2e9-fbfa-4dbb-b421-73d5175e4213	The Enmaa application is an excellent application.	على	##########			0	ar	us		5	ar	enmaa application excellent application	Positive	0	0	0
Google Play Store	a99f8bc0-99ff-4f37-b2d6-c58aa593ba1d	The best application, honestly.	احمد محمد العطاب	##########			0	ar	us		5	ar	best application honestly	Positive	0	0	0
Google Play Store	3df0c98b-4e99-4e91-80ad-a21350b62777	The best bank.	Mahmoud Mohammed	2023-03-04 01:52:00			0	ar	us		5	ar	best bank	Positive	0	0	0
Google Play Store	186bf9be-e31f-45ab-abde-a57a3f586b08	Bad	Tarek adbis	##########			0	ar	us		1	ar	bad	Neutral	1	0	0
Google Play Store	1c26bb01-c7c8-4043-9c23-cda10bb09cac	nice	أبو عمر	##########			0	ar	us		4	ar	nice	Positive	0	0	0
Google Play Store	9f05e8f2-c6b1-4796-9626-ce119acfe46e	Thank you.	Othmann Hsawi	##########			0	ar	us		5	ar	thank	Positive	0	0	0
Google Play Store	53a61dbb-1203-4e0c-8301-9982d182cb77	The bank is very nice, but the application is not working properly, it's slow.	‪MAHER “Professional” Security‬‏	##########			0	ar	us		5	ar	bank nice application work properly slow	Negative	1	1	1
Google Play Store	1944e6c2-bf64-43e3-8191-ec00e69cdaae	The application is frozen and cannot open an account.	MOHAMMED ALGAZAWI	##########			0	ar	us		1	ar	application freeze open account	Negative	0	1	1
Google Play Store	a83e4a10-2d66-4897-927e-d00799ee7866	Very good.	عبدالعزيز البكري	##########			0	ar	us		1	ar	good	Positive	0	0	0
Google Play Store	24aea7ac-b280-4d74-a6a1-241419f8ddd7	The worst bank application in Saudi Arabia.	shehab shkeeb	##########			0	ar	us		1	ar	bad bank application saudi arabia	Negative	1	0	0
Google Play Store	f0a3bc16-63fd-4017-aa6d-bde4316d1aa6	What is the role of the website's mother?	غريب الدار	2023-03-02 06:09:00			0	ar	us		1	ar	role websites mother	Neutral	1	0	0
Google Play Store	5d61c44a-72fe-47ce-a4d9-46e680ad15e2	They deserve it.	غربه	##########			0	ar	us		5	ar	deserve	Positive	0	0	0
Google Play Store	ce4f8d50-5c0a-43c0-b0c0-0198da2b8bb2	I will get back to you after the application speaks and I am able to convert from it.	سلمان الحريصي	##########			0	ar	us		2	ar	get back application speak able convert	Neutral	0	1	0
Google Play Store	6a741b15-2a21-45f0-b852-822539adb2d7	Please provide the specific Arabic text that you would like translated into English.	صابرين الغامدي	##########			0	ar	us		2	ar	please provide specific arabic text would like translate english	Neutral	0	1	0
Google Play Store	95bc5ba7-6ae9-447f-803b-43ba70917d98	The application has become very annoying due to the request to open the geographic location. We hope to disable this annoying feature.	Khalid Eltayeb	##########			0	ar	us		1	ar	application become annoy due request open geographic location hope disable annoy feature	Negative	1	1	0
Google Play Store	f317e653-f3cd-4bea-9a7a-f3e631532433	The application does not open for me, and I always encounter this problem.	عبدالإله صالح الأنصاري	2023-03-01 08:01:00			0	ar	us		3	ar	application open always encounter problem	Negative	0	1	0
Google Play Store	b9fe292c-ccb0-450c-949e-65909ef71759	The application does not open.	Salahbasheir111@gmail.com Salahbasheir111@gmail.com	2023-03-01 04:38:00			0	ar	us		5	ar	application open	Neutral	0	1	0
Google Play Store	27abf66e-c631-4f63-baec-6a6d71986ec3	Beautiful	فارس ابووسام	##########			0	ar	us		5	ar	beautiful	Positive	0	0	0
Google Play Store	8901ce06-03d2-4aa5-9173-48f76b39ad7e	The best bank, of course.	Sayed Mhanna	##########			0	ar	us		5	ar	best bank course	Positive	0	0	0
Google Play Store	43ee68be-1852-41f4-bfc6-809b42d74052	No opening according to my current neighbor.	احمد سامي	##########			0	ar	us		5	ar	open accord current neighbor	Neutral	0	1	0
Google Play Store	4cb7ed56-25b7-4d6d-bd32-b9728e996e11	Why do you force me to allow sharing the website?	abuzezo baker	##########			0	ar	us		1	ar	force allow share website	Negative	0	1	0
Google Play Store	6c559691-ed26-40f6-8456-d07fdf011e20	The application has a problem and does not deserve a star.	ابو عزام Alharthi	##########			0	ar	us		1	ar	application problem deserve star	Negative	1	0	0
Google Play Store	7a9ae334-9f47-4133-926b-dc025df5ac71	I have been unable to open the application for almost a week because it's not sending the code to my mobile. Time is running out and I still haven't received the code. I went to the branch and they said there is an issue, they will send an email and check, but I haven't received anything yet. The problem is not resolved. The truth is, the application is not worth it, not even one star.	Akram AL Ghamdi	##########			0	ar	us		1	ar	unable open application almost week send code mobile time run still havent receive code go branch say issue send email check havent receive anything yet problem resolve truth application worth even one star	Negative	0	1	0
Google Play Store	89e59e16-7b05-424c-999d-f361f428fb19	Very bad, there is no respect for clients. The renewal and replacement stage was the worst experience I have ever had. The program does not respond, and if you are able to log in, it takes a very long time to process financial transactions. Alinma Bank has been in its worst state for three months now.	A ALSHA	##########			0	ar	us		1	ar	bad respect clients renewal replacement stage bad experience ever program respond able log take long time process financial transactions alinma bank bad state three months	Negative	1	1	1
Google Play Store	631c01f9-58f9-4eee-a4a2-9146c7ed16e2	It always opens only after the latest update. It asks me to allow the location. And I already have it on. But this thing is stuck. Bring it back to how it was before, our work is stuck again.	ابو ابراهيم	##########			0	ar	us		1	ar	always open late update ask allow location already thing stick bring back work stick	Negative	0	1	1
Google Play Store	38afcb8a-64e8-4295-9100-19a6b05db384	I am a failure. It is true, these comments saying that I am a failure. I will delete this account and move to other banks.	أنا انا	##########			0	ar	us		1	ar	failure true comment say failure delete account move bank	Negative	0	1	0
Google Play Store	1f338603-8ce8-4b0c-b0b1-a3f7ad7154e7	Unfortunately, the application has gone from bad to worse since morning. I'm trying to enter the application and it asks me for the location, and I enter the location but it keeps loading and I couldn't enter. I tried many times, even the rating star in it is a disgrace. 👎👎👎👎👎👎👎👎	Yhlmon .1985	##########			0	ar	us		1	ar	unfortunately application go bad bad since morning im try enter application ask location enter location keep load couldnt enter try many time even rat star disgrace	Negative	1	1	0
Google Play Store	cb333f35-1dba-4dce-8600-f2f14853e1cd	The application has become very bad and I can't access my account.	محمود ابوهاشم	##########			1	ar	us		1	ar	application become bad cant access account	Negative	1	1	0
Google Play Store	06e1606a-b5a4-405a-bf64-963c033bb948	In a comment on opening the application, it doesn't enter smoothly. This is a new problem!!	Ahmed Ahmed	##########			0	ar	us		4	ar	comment open application doesnt enter smoothly new problem	Negative	0	1	0
Google Play Store	465abae8-5245-4df7-8030-87b70b8de00d	I cannot transfer the additional balance from the traveler card to my current account. It's been very frustrating, I even reached out to them on Twitter about the different options and filed a complaint, but they did not resolve the issue. It's absolutely unacceptable that our interests are being affected by this failure. I had a platinum account with them, but this will be my last interaction wi…	Abdulrahman Alzahrani	##########			0	ar	us		1	ar	transfer additional balance traveler card current account frustrate even reach twitter different options file complaint resolve issue absolutely unacceptable interest affect failure platinum account last interaction god will advise stay away matter brothers	Negative	1	1	0
Google Play Store	8e25c34f-a595-4269-8134-889a7d971880	Why doesn't the code work for me? This is the fourth time I've tried to access the application and I can't.	منوله العيسى	##########			0	ar	us		3	ar	doesnt code work fourth time ive try access application cant	Negative	0	1	0
Google Play Store	30fd7236-0576-4c2f-b31a-055208ba5162	They are very bad and their behavior is not good. They don't respect their appointments. I have a canceled transaction for over a month and they haven't refunded the amount. When I contact their customer service and file a complaint, they say they will contact me, but there is no communication at all.	Osama Esam	##########			0	ar	us		1	ar	bad behavior good dont respect appointments cancel transaction month havent refund amount contact customer service file complaint say contact communication	Negative	1	1	0
Google Play Store	963f2627-90a2-43a9-9096-e84053a73c41	I am trying to open an account without any benefit.	ali -namer	##########			0	ar	us		1	ar	try open account without benefit	Negative	0	1	0
Google Play Store	3fdbe4d8-0749-43e2-a383-03100948e8b8	The problem with the annoying page when opening the application has been solved. We hope for more progress and excellence for the bank, and may God make it successful.	منصور الحربي	##########			1	ar	us		4	ar	problem annoy page open application solve hope progress excellence bank may god make successful	Positive	1	0	0
Google Play Store	16180a03-5560-4403-9966-fd6eb5774c17	Payment methods	kamal Elshawadfy	##########			0	ar	us		5	ar	payment methods	Neutral	0	1	0
Google Play Store	33029425-7490-44de-b8b9-f3eb12d6a586	After the latest update, it became bad and requires the website to be running... If it continues like this, I will close my account as I did in SAB.	azk ksa	##########			0	ar	us		1	ar	late update become bad require website run continue like close account sab	Negative	1	0	0
Google Play Store	3cb673ce-4b80-4259-8de7-f621becec25f	The application no longer opens as it used to before.	عدنان الشملان	##########			0	ar	us		1	ar	application long open use	Neutral	0	1	0
Google Play Store	ea2d2ff3-5bed-4761-bbe1-ce0c2eb00cb7	Royal tents, excellent application.	ابو خالد	##########			0	ar	us		5	ar	royal tent excellent application	Positive	1	0	0
Google Play Store	4c2cea80-4894-40ed-8b45-471fc3637ce9	He refuses to open an online account, saying that the mobile is not registered in your name. And then again, we cannot process your request with your ID number! A waste of time without any benefit, and the support tells me to go to the branch to open an account! If their transactions are complicated and mysterious before opening the account, how will they be afterwards?	عيسى الغفيلي	##########			0	ar	us		1	ar	refuse open online account say mobile register name process request id number waste time without benefit support tell go branch open account transactions complicate mysterious open account afterwards	Negative	1	1	1
Google Play Store	47c23c71-bfed-4d4e-9c39-d87ff6506ed9	He is requesting to update the application, but it has not been updated in the store.	Abdulrahman Alessa	##########			0	ar	us		5	ar	request update application update store	Neutral	0	1	0
Google Play Store	ee68931d-7c98-455f-bdfb-dd2571f45cd9	Excellent	Salah Hassan	##########			0	ar	us		5	ar	excellent	Positive	0	0	0
Google Play Store	f69d663f-19e5-4092-8773-0e3329438cc5	Honestly, it is the worst bank I have dealt with. Their service is terrible, and the services provided by the employees in the branches are also bad.	محمد يوسف	##########			0	ar	us		1	ar	honestly bad bank deal service terrible service provide employees branch also bad	Negative	1	0	0
Google Play Store	430f8701-9629-4455-9ab0-bfeca69e2226	The program is very weak in its usability, especially when waiting for the login message, it takes a very long time.	زكريا الخليدي	##########			0	ar	us		1	ar	program weak usability especially wait login message take long time	Negative	1	0	1
Google Play Store	40159365-4013-4c0f-8d19-e8c585d5046b	It hangs and doesn't open, it's heavy, and the level is very, very bad.	سام .م	##########			0	ar	us		1	ar	hang doesnt open heavy level bad	Negative	1	0	1
Google Play Store	60007683-3987-48d6-a9c6-30514a5e85b5	Slowly and incorrect information	Yomna nabulsi	##########			0	ar	us		1	ar	slowly incorrect information	Negative	1	1	1
Google Play Store	d88578fa-4c73-47dd-908a-974cdcc5a8db	Excellence	ABDULGHNI ALZAHRANI	##########			0	ar	us		5	ar	excellence	Positive	0	0	0
Google Play Store	8de2b2be-662c-4098-a0d6-3445b471ad8a	We provide good service and quick achievement, May Allah bless you.	محمد الداود	##########			0	ar	us		5	ar	provide good service quick achievement may allah bless	Positive	0	0	0
Google Play Store	1e40b08d-56d0-4cef-af64-98be9fa8c424	Excellent	عوض ال عبيد عبيد	##########			0	ar	us		5	ar	excellent	Positive	0	0	0
Google Play Store	f95cf927-3fb9-49e9-9bc7-f224e103eff2	It has become very bad and extremely slow. You updated the application and you deleted everything in it, including invoices and commitments. May Allah help you with the poor performance of your application. The application doesn't work for me at all. What is your problem?	Zainah Alareeshi	##########			5	ar	us		1	ar	become bad extremely slow update application delete everything include invoice commitments may allah help poor performance application application doesnt work problem	Negative	1	0	1
Google Play Store	9bd5674b-cafa-4895-b14a-c79ec5458cc4	Why do you require us to specify the location? What is the legal basis, article, or directive that obligates the customer to grant you permission to access the location? If the issue is for the purpose of providing better service and knowing the nearest branch or device, you can make the feature optional rather than mandatory. Please modify the location tracking feature to be our choice instead o…	osama Aljambi	##########			13	ar	us		1	ar	require us specify location legal basis article directive obligate customer grant permission access location issue purpose provide good service know near branch device make feature optional rather mandatory please modify location track feature choice instead force us thank another thing write arabic allow	Neutral	1	1	0
Google Play Store	e2ce4998-37bf-429f-8e3c-e93dec9d2803	The application is bad. Every time, it asks for an update even though I checked the Google Play Store and there are no new updates. Despite that, it still asks me to update, and I cannot access my account. It's so bad that it's not worth paying for, it doesn't respond properly. May God help you.	محمد الوسمي	##########			3	ar	us		1	ar	application bad every time ask update even though check google play store new update despite still ask update access account bad worth pay doesnt respond properly may god help	Negative	1	1	0
Google Play Store	09cff25c-3b1d-4ff9-915b-b8bdd20d4a57	One of the best banking applications and Banks Problem is the latest update, it's a disaster and sometimes it doesn't work for two days. The app didn't work for me.	حسين عبدالعزيز	##########			2	ar	us		1	ar	one best bank applications bank problem late update disaster sometimes doesnt work two days app didnt work	Negative	1	1	0
Google Play Store	49af3b0a-abf4-4419-8b73-c30dff4633d5	Very beautiful and wonderful.	حارث العمراني	##########			1	ar	us		5	ar	beautiful wonderful	Positive	0	0	0
Google Play Store	75abd57f-29b8-406a-8216-87455191f173	the worstlication in every sense of the word.	هيثم الحمادي	##########			0	ar	us		1	ar	worstlication every sense word	Negative	1	0	0
Google Play Store	6908da58-abfa-4d96-8f54-4977fee1e1dc	It won't open. It tells me to update the application, but it is already updated with me.	وديع الصافي	##########			0	ar	us		5	ar	wont open tell update application already update	Negative	0	1	0
Google Play Store	5d17eb23-2fa5-4bf5-88f8-8716104568b5	Excellent very very very	Ali Giet	##########			0	ar	us		5	ar	excellent	Positive	0	0	0
Google Play Store	c43a578c-11f6-483c-93e5-a969210a2c24	Good, somewhat.	Ashraf bonde	##########			0	ar	us		3	ar	good somewhat	Positive	0	0	0
Google Play Store	ae8b672a-5045-4c5e-a227-ecae9156c655	Excellence	نجيب الحسام	##########			0	ar	us		5	ar	excellence	Positive	0	0	0
Google Play Store	83462305-142f-4fd8-a25f-8e0ffd25a08f	Destroyed	زكريا عمران عمران	##########			0	ar	us		5	ar	destroy	Negative	0	1	0
Google Play Store	47043c96-9f0a-4103-a65d-a9c6475dd3cb	Peace be upon you, and may the mercy and blessings of Allah be upon you. Despite having a reason in the Alinma Bank, when we want to retrieve the transferred money internationally, it is not accepted. We want this issue to be fixed and to provide us with features in the application for retrieving transferred money. Why does it make a mistake in the name? Therefore, we want you to give us this fea…	وائل الصبري	##########			0	ar	us		5	ar	peace upon may mercy blessings allah upon despite reason alinma bank want retrieve transfer money internationally accept want issue fix provide us feature application retrieve transfer money make mistake name therefore want give us feature program retrieve transfer money want activate like bank may allah protect guide want agree request alinma bank customers thank alinma bank provide facilities c…	Neutral	1	0	0
Google Play Store	41a35714-7476-4ca6-b5e7-5054dc20fd6d	Excellent and good application, and the services in it are excellent.	Anise	##########			1	ar	us		5	ar	excellent good application service excellent	Positive	0	0	0
Google Play Store	1ea18337-c341-452f-b45d-c90b2831883d	Excellent application	نوره الحارثي	##########			0	ar	us		4	ar	excellent application	Positive	0	0	0
Google Play Store	27469409-ae38-49c1-887d-346b326ed771	After the update, the application has become very bad. It does not accept quick login activation, fingerprint recognition, and money transfers from one bank to another are delayed. We hope you can solve the issues with the application or revert it back to the previous version before the update.	Nabeel al shabhy	##########			8	ar	us		1	ar	update application become bad accept quick login activation fingerprint recognition money transfer one bank another delay hope solve issue application revert back previous version update	Negative	1	1	0
Google Play Store	91511b63-78ba-43eb-a818-87248dbc780b	What is the wisdom in me being forced to visit the nearest branch to update my data? I have tried several times through the website and the application, but no attempt has succeeded.	سامي العيدروس	##########			1	ar	us		1	ar	wisdom force visit near branch update data try several time website application attempt succeed	Negative	0	1	0
Google Play Store	5372f724-4f81-4a80-8455-e522cbb4c373	The Mutaab application used to be good in the past, but now it has become sluggish.	Awad Ali	##########			2	ar	us		1	ar	mutaab application use good past become sluggish	Negative	1	0	0
Google Play Store	8e86de2b-f392-4002-a790-3cbedf7b372a	The truth is that the Development Bank is exhausted and failing.	عبدالرحمن الجهني	##########			0	ar	us		1	ar	truth development bank exhaust fail	Negative	1	1	0
Google Play Store	b8e05817-0f24-4fe8-85aa-5d8baad3a987	A successful and easy-to-use application.	Losha	##########			0	ar	us		5	ar	successful easytouse application	Positive	0	0	0
Google Play Store	25f7e1fe-add1-4f75-8f4b-95c918c11ec3	The new update is a failure that forces you to share your location. What do you want from my website?	s d	##########			1	ar	us		1	ar	new update failure force share location want website	Negative	0	1	0
Google Play Store	e098d2ef-7f84-49de-a3cf-e63c29b67565	It's a struggle without limits when transferring a mobile number from Saudi Telecom (STC) to Zain. The activation process takes a long time, sometimes it doesn't even happen, and I have to keep trying repeatedly.	عبدالله arar	##########			0	ar	us		1	ar	struggle without limit transfer mobile number saudi telecom stc zain activation process take long time sometimes doesnt even happen keep try repeatedly	Negative	0	1	1
Google Play Store	7bd887f6-0387-4861-aee5-b2d0d1a9783e	Good, but sometimes the application doesn't open for me.	مشلتن كل وقته نشلتن	##########			0	ar	us		5	ar	good sometimes application doesnt open	Negative	1	1	0
Google Play Store	a124d2f2-3b23-4f76-b14b-a3c31186b0b7	Excellent	عبدالله الحازمي	##########			0	ar	us		5	ar	excellent	Positive	0	0	0
Google Play Store	da11aee8-b4c8-41be-81f8-3b6f39f6a944	Al-Anmaa is well-known and needs no further introduction, but I hope there are no complications.	Reema Hakami	##########			0	ar	us		5	ar	alanmaa wellknown need introduction hope complications	Neutral	1	0	0
Google Play Store	2c3fe8f5-5ec9-4c10-9332-216fdb28f86e	It does not update automatically and then requests a manual update.	Ahmed H	##########			0	ar	us		3	ar	update automatically request manual update	Negative	0	1	0
Google Play Store	5a43abc4-4067-4756-bba9-e0f1bca4c8c9	I am unable to log in. It says that the system is currently being upgraded.	مروة اليامي	##########			0	ar	us		1	ar	unable log say system currently upgrade	Negative	0	1	0
Google Play Store	ac46d80d-ab88-4442-8b3a-4dadaea15393	Unfortunately, it has become bad after the latest update. 👎🏼	ماجد الرشيدي	##########			1	ar	us		2	ar	unfortunately become bad late update	Negative	1	0	0
Google Play Store	1fa1531b-a3a9-48c4-a9ce-e281bf84dc4e	The best bank and the best application; everything is clear and easy.	BELAL	##########			0	ar	us		5	ar	best bank best application everything clear easy	Positive	0	0	0
Google Play Store	5cb6840f-8700-4530-b081-2f1414aac380	Excellence and performance..... I noticed that when transferring to another country through the Alinma account, in the final step of the transfer, it gives an error and when I try again, the problem persists. What is the solution to this issue?!	خالد البكير	##########			32	ar	us		4	ar	excellence performance notice transfer another country alinma account final step transfer give error try problem persist solution issue	Negative	0	1	0
Google Play Store	5aae130f-8d29-47e4-9207-085b67b08fd4	Hey bro, the application has huge problems.	Initiative Initiative	##########			0	ar	us		1	ar	hey bro application huge problems	Negative	0	0	0
Google Play Store	7d2cf3b6-fb9c-4fd9-ba11-6fd37a396e8e	It deserves six stars.	Saud Nasser	##########			0	ar	us		5	ar	deserve six star	Positive	0	0	0
Google Play Store	231ade2d-aa23-4fbc-ac3c-7bb6d007f5f6	Excellent very much.	Fayez Alanazi	##########			0	ar	us		4	ar	excellent much	Positive	0	0	0
Google Play Store	fb21e2c2-4e18-41a9-8ed3-556076588382	Sophisticated banking services	أبو امجد بن عبيد	##########			0	ar	us		5	ar	sophisticate bank service	Negative	0	0	0
Google Play Store	979e28d2-dc27-40ad-bea6-c15c4268ada7	"An excellent and very easy-to-use application that deserves trust."	‪badr al_shadadi (‫البدر‬‎)‬‏	##########			0	ar	us		5	ar	excellent easytouse application deserve trust	Positive	0	0	0
Google Play Store	5178692f-74bd-4f55-93aa-31a79f0fa8f6	the worstlication that does not prioritize the privacy of its customers. Every time it asks for location, I am unable to resolve my issues.	J Uuj	##########			1	ar	us		1	ar	worstlication prioritize privacy customers every time ask location unable resolve issue	Negative	0	1	0
Google Play Store	639a4d6f-1158-44e7-b7c0-0af5b61e2222	Wonderful	صادق الجعداني	##########			0	ar	us		5	ar	wonderful	Positive	0	0	0
Google Play Store	02a83ccc-25fd-451f-9c42-7119d0b18116	Unfortunately, my experience with the application was not successful. It asks me to update to the latest version in order to open it, but when I enter the app store, it does not ask me to update.	ماجد الشمري	##########			0	ar	us		1	ar	unfortunately experience application successful ask update late version order open enter app store ask update	Negative	1	1	0
Google Play Store	3b7a2eb4-cc17-45f6-b2d5-c85fb12cee0e	I do not recommend anyone for the service, quality, or online service. The Star is disappointing from you all.	محمد كعكي	##########			0	ar	us		1	ar	recommend anyone service quality online service star disappoint	Negative	1	0	0
Google Play Store	ec907c3a-1314-454f-9591-efa2d9846354	Bad	خالد تركستاني	##########			0	ar	us		1	ar	bad	Neutral	1	0	0
Google Play Store	a01ee921-414d-476f-9e18-88e16358ebf9	We hope that Alinma Bank does not require us to use the website to protect our privacy, so that we can use the application. It is unfortunate that such actions are taken by a bank that we trust and respect. If there is no response, I will delete the application.	A Y	##########			1	ar	us		1	ar	hope alinma bank require us use website protect privacy use application unfortunate action take bank trust respect response delete application	Negative	1	1	0
Google Play Store	2bbaeff0-9786-4e18-a4fd-3f62d0666253	Why do I have to put the website or can't I enter? I hope it's something optional at least, the application was good until this move! Please update this option.	LuLu O	##########			0	ar	us		2	ar	put website cant enter hope something optional least application good move please update option	Negative	0	1	0
Google Play Store	b7bdc64b-1b8e-4d2c-b2cf-5cb0fcacaf7a	The application does not work with the fingerprint system and I have been suffering from it a lot recently.	Abdullah Alrashed	##########			1	ar	us		3	ar	application work fingerprint system suffer lot recently	Negative	0	1	0
Google Play Store	01b2785f-6a4c-4f80-9e51-9072471cca9e	The application is not working at all.	فاطمه الدوسري	##########			1	ar	us		1	ar	application work	Negative	0	1	0
Google Play Store	ae69c6fe-af99-480d-be5d-d4f981caacdb	Does not work very bad	jollyan M	##########			1	ar	us		1	ar	work bad	Negative	1	1	0
Google Play Store	1dbf7fc1-5218-4060-8301-7331501a04c6	This translates to: "Failed👎I tried to open an online account and it didn't accept. It said to go to the nearest branch. All my information is correct."	Ahmed bin Saad	##########			0	ar	us		1	ar	translate failedi try open online account didnt accept say go near branch information correct	Negative	0	1	0
Google Play Store	84300565-6d38-4618-8577-898b37f0f383	Best services and finest treatment.	TOB GULFSTORE	##########			0	ar	us		5	ar	best service fine treatment	Positive	0	0	0
Google Play Store	833e861a-32e5-44b1-8ec8-2e3f590b05cb	The application is freezing on Android.	قصي قصة	##########			0	ar	us		5	ar	application freeze android	Negative	0	0	1
Google Play Store	f19883f1-f044-4889-9b0a-a654c84277ad	Every time I enter, it says "Specify your location" and I do specify my location, but unfortunately the application doesn't open.	H Gadi	##########			2	ar	us		1	ar	every time enter say specify location specify location unfortunately application doesnt open	Negative	0	1	0
Google Play Store	67c0a28a-3e2a-4bd0-92d9-cc3a962c5ac4	Thank you for your cooperation.	مجاهد الخباني	##########			0	ar	us		5	ar	thank cooperation	Positive	0	0	0
Google Play Store	12e3bf55-e16e-4189-a57c-1140b6194fd0	He is frequently late, and we can only access the account with difficulty.	ابو طارق	##########			1	ar	us		1	ar	frequently late access account difficulty	Negative	0	0	0
Google Play Store	350d6b2e-9356-43eb-bec9-c3d498aeb95e	There have been many comments after the recent update.	munther al juhani	##########			2	ar	us		2	ar	many comment recent update	Neutral	0	1	0
Google Play Store	1b8e64e2-c88e-4050-af61-cf15a4cd5356	Dear partner, try again later. What's going on?	مرام العبري	##########			1	ar	us		1	ar	dear partner try late whats go	Neutral	1	0	0
Google Play Store	fd23678b-4363-45d3-9441-7b05bc60b864	There is a problem with accessing the application today. It used to be fast before, but now it doesn't allow me to login.	ghadah AlRabee	2023-02-09 09:54:00			5	ar	us		5	ar	problem access application today use fast doesnt allow login	Negative	0	1	0
Google Play Store	9a47e61e-40aa-4cef-902c-8694d56c910f	It's all good, but sometimes it gets stuck.	عبدالله الحامد	2023-02-09 03:38:00			0	ar	us		4	ar	good sometimes get stick	Neutral	1	0	1
Google Play Store	49f08d64-11cd-4464-b8ed-3d2464b40d38	Very very beautiful.	Akr Am123	##########			0	ar	us		5	ar	beautiful	Positive	0	0	0
Google Play Store	e3323b42-2127-476a-b7f1-4c44c89b398e	Every time I try to log in, the website asks for permission and it doesn't work properly. Please help.	sameh Abbs	##########			2	ar	us		5	ar	every time try log website ask permission doesnt work properly please help	Negative	0	1	0
Google Play Store	51a9732d-1519-45da-9bca-c7ba7f3db837	What does the application need access to the location for, and why does it only open when activated?	Abh ABH	##########			2	ar	us		1	ar	application need access location open activate	Neutral	0	1	0
Google Play Store	e7289db9-4479-4511-817f-83c95cbc5335	There is a problem with the international currency transfer for the beneficiary.	Bahnasi Saif	##########			1	ar	us		1	ar	problem international currency transfer beneficiary	Negative	0	1	0
Google Play Store	29e6f260-d0d1-47b8-9faf-e93d2b3ca78a	Excellent	حصه ام الدانه	##########			0	ar	us		5	ar	excellent	Positive	0	0	0
Google Play Store	ce245396-0d0e-49de-9d2c-1c5e1859e235	"An excellent application, saves a lot of time. A thousand thanks to those who manage it."	sboha dabloul	##########			0	ar	us		5	ar	excellent application save lot time thousand thank manage	Positive	0	0	0
Google Play Store	cd5798a0-d0b5-4fda-a42a-23e66d715d6f	Garbage site after the update.	فهد البدراني	##########			1	ar	us		1	ar	garbage site update	Negative	1	0	0
Google Play Store	640651a3-87c5-4425-ae69-d912b99a31fc	The application is not working.	Faisal Rose	##########			1	ar	us		1	ar	application work	Negative	0	1	0
Google Play Store	1cd271b4-feb6-47da-a90f-9b1c7f1b3e8e	After the latest update, it has become bad. The verification code is delayed a lot. You can no longer pay your bills as a whole. Each company requires individual payment. I suggest printing it in the morning and finding a solution before people switch to other banks.	Mitab Almalki	##########			0	ar	us		1	ar	late update become bad verification code delay lot long pay bill whole company require individual payment suggest print morning find solution people switch bank	Negative	1	1	1
Google Play Store	0a962ad3-992b-468d-9b48-d3755e545f9b	Amazing	بسام بسام	2023-02-08 08:35:00			0	ar	us		5	ar	amaze	Positive	0	0	0
Google Play Store	537f3073-ddc1-4c72-82fb-840aa4da855d	The best bank in terms of extremely friendly and helpful staff.	alwomdh 9	2023-02-08 05:56:00			0	ar	us		5	ar	best bank term extremely friendly helpful staff	Positive	0	0	0
Google Play Store	b15690fb-6971-4546-b4a5-5b2e5490ef6a	The application no longer opens for me at all, despite being updated. It requests the location and I add the location, yet it still doesn't open.	ابتسامه امل	##########			0	ar	us		1	ar	application long open despite update request location add location yet still doesnt open	Negative	0	1	0
Google Play Store	7c97cf49-9f53-4bf1-855a-c106ef6a24f8	Easy to communicate with and cooperate with customers.	عبدالجليل القطافاء	##########			0	ar	us		5	ar	easy communicate cooperate customers	Positive	0	0	0
Google Play Store	ded07ee3-6733-4643-a73e-1af885420a15	I couldn't open my page. I don't know why.	Swanson A	2023-02-07 09:54:00			0	ar	us		5	ar	couldnt open page dont know	Negative	0	1	0
Google Play Store	bd190095-4eac-4a8d-b894-565ef41d4c7f	"The application does not open. I'm tired of submitting a request to customer service."	فاطمه خالد	2023-02-07 00:34:00			1	ar	us		1	ar	application open im tire submit request customer service	Negative	0	1	0
Google Play Store	a9343fa3-c4cf-4ba2-ad85-2637c78f57b6	Excellent	Motaz Azab	##########			0	ar	us		5	ar	excellent	Positive	0	0	0
Google Play Store	887862ea-c727-4ba1-8c95-f16656839eb8	The application is good, but they need to fix their issues regarding sending the code to the registered mobile number with the bank. The code always arrives late and it gets stuck. I would give it a one-star rating.	فراس الظفيري	##########			0	ar	us		1	ar	application good need fix issue regard send code register mobile number bank code always arrive late get stick would give onestar rat	Negative	1	1	1
Google Play Store	dc9ff95e-0815-4143-acf1-fc3a45102128	The application does not open unless the location is activated. Activating the location is mandatory, why???????	أبو عبدالله	##########			0	ar	us		1	ar	application open unless location activate activate location mandatory	Negative	0	1	0
Google Play Store	91df1773-42c1-4db2-ad08-598cbcd334bb	I have a problem with my salary account, I cannot transfer international funds. I went to open a personal account, and the employee told me that I have to cancel my salary account in order to open a personal account. The person in charge at the General Administration on King Fahd Road does not know how to deal with customers.	king s	##########			0	ar	us		1	ar	problem salary account transfer international fund go open personal account employee tell cancel salary account order open personal account person charge general administration king fahd road know deal customers	Negative	0	1	0
Google Play Store	19e94104-4993-4205-8bb0-4b8bf623dc36	Every now and then, the website asks me for an update. It's not pleasant. I hope it can be fixed to be the same as when it first asked for the update.	Sultan S.a.n	##########			2	ar	us		3	ar	every website ask update pleasant hope fix first ask update	Negative	1	0	0
Google Play Store	4b27abf9-323c-432e-adba-28731a523622	Through our experience, it was very nice.	طلال علي	2023-02-06 04:58:00			0	ar	us		5	ar	experience nice	Positive	0	0	0
Google Play Store	765575bf-ae8f-4e1a-a6a3-ed7fa75ef12d	Failed program, it doesn't respond after the latest update.	Fozy Saad	##########			0	ar	us		1	ar	fail program doesnt respond late update	Negative	0	1	0
Google Play Store	fae57add-dfcf-43a5-864d-5420a699d06b	A wonderful application.	mensur alibekhit	##########			0	ar	us		5	ar	wonderful application	Positive	0	0	0
Google Play Store	779c8574-00fe-4d40-a692-0eca2c217092	Excellent.	مدالله عناد	2023-02-05 07:09:00			0	ar	us		5	ar	excellent	Positive	0	0	0
Google Play Store	c77f4315-dc27-449e-878a-5f4e0cdccce2	Bad.	alwaleed haroun	2023-02-05 06:00:00			0	ar	us		1	ar	bad	Negative	1	0	0
Google Play Store	e90ff6eb-03cb-4e14-a5e0-02a8c38e8f87	Thank you for your service and your cooperation.	Ibrahim	2023-02-05 05:37:00			0	ar	us		5	ar	thank service cooperation	Positive	0	0	0
Google Play Store	a4631446-4023-4f7b-add5-3c3f406f7cdf	"After the last update, it became bad. The website is requesting, why is it requesting the location?"	عبد العزيز السبيعي	2023-02-04 05:47:00			3	ar	us		1	ar	last update become bad website request request location	Negative	1	0	0
Google Play Store	77940852-945a-41fa-b934-13ea91b3a143	We try it.	خليل العقاب	##########			0	ar	us		5	ar	try	Neutral	0	1	0
Google Play Store	5a94cc6b-ecfe-4f2c-9d2a-111c4120bd9b	Very good	حمود العبدلي	2023-02-03 09:15:00			0	ar	us		5	ar	good	Positive	0	0	0
Google Play Store	8b8849d5-42a5-49da-88f6-4220dd9fddf8	Great banking application 😎	Beshoo balhareth	2023-02-03 00:40:00			0	ar	us		5	ar	great bank application	Positive	0	0	0
Google Play Store	034fb580-387e-45ec-aea8-9ec20789b4c6	Zero is an application that has many problems, it is not suitable as a bank, its malfunctions are abundant.	Anas Alhmydi	2023-02-03 00:11:00			0	ar	us		1	ar	zero application many problems suitable bank malfunction abundant	Negative	1	1	0
Google Play Store	8da3623d-9299-490a-9730-01c6c350ee6d	Very very bad in transfers.	Ahmed Sayed	##########			0	ar	us		1	ar	bad transfer	Negative	1	0	0
Google Play Store	de33e789-925f-4018-866b-fb10f2786d44	Unfortunately, it's very bad. You can't open an account or register from it.	محمد الغزواني	##########			0	ar	us		1	ar	unfortunately bad cant open account register	Negative	1	1	0
Google Play Store	9036e21c-ee2f-47d7-9bb1-fa51444c8835	The application has been frozen for more than three days.	ESSA M	##########			0	ar	us		1	ar	application freeze three days	Negative	1	0	1
Google Play Store	1ed3c1f1-12a2-496d-8ea3-d120eff69e5e	The application has not been working for two days.	اروى العلي	2023-02-02 09:54:00			0	ar	us		4	ar	application work two days	Negative	0	1	0
Google Play Store	94382d88-a441-408f-b9b3-ce760b0b7e13	It is very bad, I get an unavailable web page.	lulaa kdr	##########			0	ar	us		1	ar	bad get unavailable web page	Negative	1	1	0
Google Play Store	adc79f6d-2184-45ba-bc13-106facd16ea9	I hope to develop the financing screen so that it becomes a digital screen.	ابو عثمان	##########			1	ar	us		3	ar	hope develop finance screen become digital screen	Neutral	1	0	0
Google Play Store	81319dd3-bd17-4021-97ce-08adf63cc814	Thank you for your excellent services.	Radfan ALNADHRI	##########			0	ar	us		5	ar	thank excellent service	Positive	0	0	0
Google Play Store	205f6b7b-1450-4f89-a89a-bef7a00bc92e	Excellent	وشيلة قضابي	##########			0	ar	us		5	ar	excellent	Positive	0	0	0
Google Play Store	7e3e43a6-7041-4b9b-b903-183d5286773d	"My experience was and still is better and better, and then the best, and then, for the best, beautiful. If there were a million stars to rate and praise its services, it would deserve it. As for those who criticize or say it's a failure, I think they just don't know how to use it. It is known to be the easiest application to use, even for those who are not familiar with it."	محمد علي	##########			2	ar	us		5	ar	experience still good good best best beautiful million star rate praise service would deserve criticize say failure think dont know use know easy application use even familiar	Positive	1	0	0
Google Play Store	9612adff-d6db-451d-8b86-e2f7c45da49b	Does not open an online account at all, it is a bad application.	شمعة امل	##########			1	ar	us		1	ar	open online account bad application	Negative	1	1	0
Google Play Store	49e5c2c0-6187-42ab-ada7-ba839f9b20b6	Good.	abuo atti	##########			0	ar	us		3	ar	good	Positive	0	0	0
Google Play Store	a13a933a-914f-4557-97ad-91e67ac74cc7	I request help in solving a login freezing problem.	نايف فقط	##########			0	ar	us		1	ar	request help solve login freeze problem	Neutral	0	1	1
Google Play Store	3ac74e66-ddcb-4446-bfb0-5b01c8388329	Does not deserve a single star, he is a failure.	مصطفى ابو مالك الحويكم	##########			0	ar	us		1	ar	deserve single star failure	Negative	1	0	0
Google Play Store	0c803532-ccfe-4bb9-89ee-0af4ee26d8ba	Very special	نعمان العواضي	##########			0	ar	us		5	ar	special	Positive	0	0	0
Google Play Store	266424c3-c86d-4431-bb30-1cfbfe538532	Why do you force us every time we use the app to activate the GPS? It's the worst version.	ابو محمد	##########			2	ar	us		1	ar	force us every time use app activate gps bad version	Negative	1	0	0
Google Play Store	e64a7af4-aa38-4f09-874f-b13a019604de	He doesn't even deserve a star, not even Mutaib, and messages saying the operation was successful were sent, but the application did not complete, try again without embarrassment, learn from other banks.	ru Fh	##########			1	ar	us		1	ar	doesnt even deserve star even mutaib message say operation successful send application complete try without embarrassment learn bank	Negative	1	1	0
Google Play Store	c88c7670-7f79-4de5-ac1f-6081f2c8e93f	It is the worstlication, a failure. When you try to login, the screen turns white. I can't do anything. I try to delete it and reinstall it, but the same problem persists.???????	وليد شبوة	##########			0	ar	us		1	ar	worstlication failure try login screen turn white cant anything try delete reinstall problem persist	Negative	0	1	0
Google Play Store	379671e1-7d8c-465d-ae63-6bfc69a72842	Excellent, I recommend downloading it 👍👍👍 and thank you.	فيحان العتيبي	##########			0	ar	us		5	ar	excellent recommend download thank	Positive	0	0	0
Google Play Store	1b5506f0-8ce6-4190-8eee-7a21c4fd131b	The best and most amazing application.	ابوبكر المطري	##########			0	ar	us		5	ar	best amaze application	Positive	0	0	0
Google Play Store	3b5344dd-c5ec-439f-9a98-5e4722eb4314	Okay	خالد العاطفي	##########			0	ar	us		5	ar	okay	Positive	0	0	0
Google Play Store	80644978-b692-4245-8420-e211d986fc7b	Great program 👍	مطعم وليمتي	##########			0	ar	us		5	ar	great program	Positive	0	0	0
Google Play Store	958ce02d-2b74-47fb-abe8-ab92eb6a98ba	Good	Muhammed Shameeri	##########			0	ar	us		5	ar	good	Positive	0	0	0
Google Play Store	e5eb11a7-288a-4487-9758-2f16a8da58d3	I cannot access my mobile device after logging in. A message appears saying that your mobile is not registered, do you want to add it? I chose yes and received a call from Anmaha asking if I want to add my mobile, press a certain number. The call ends and I try to log in again, but the process repeats. I try again and the process repeats. I am noting this and the Anmaha phone continues to call me…	احمد العقيلي	##########			7	ar	us		1	ar	access mobile device log message appear say mobile register want add choose yes receive call anmaha ask want add mobile press certain number call end try log process repeat try process repeat note anmaha phone continue call kindly request solve problem	Negative	0	1	0
Google Play Store	7594b650-91c0-41bc-bda0-6f1c1b7536e6	Excellent very much	خالد سالم	##########			0	ar	us		5	ar	excellent much	Positive	0	0	0
Google Play Store	f9f66320-9099-4431-9eca-d058534cdb25	The best banking application	ابوسمحان Hassan	##########			0	ar	us		5	ar	best bank application	Positive	0	0	0
Google Play Store	8458803c-de12-49f8-a9dc-932cb85be4e8	Beautiful	NOURAH SHNEEF	##########			0	ar	us		5	ar	beautiful	Positive	0	0	0
Google Play Store	d4e0c5f5-07ba-4cc5-85d7-5caa7f2044a2	After the update, there is a problem with bill payments because previously I could pay the bill amount before it was issued by allocating the required amount and paying it early to organize my monthly expenses. Now, it is not possible, and I hope necessary actions are taken so that we don't have to switch to another bank that values its customers.	Moteb Al Shehri	##########			0	ar	us		3	ar	update problem bill payments previously could pay bill amount issue allocate require amount pay early organize monthly expense possible hope necessary action take dont switch another bank value customers	Negative	0	1	0
Google Play Store	4ee58655-deb2-43e0-bff5-34509b5e5ca1	There is a problem with updating the application.	Aymen gaber ahmed	##########			0	ar	us		5	ar	problem update application	Negative	0	1	0
Google Play Store	ffce34d6-6b01-4b78-88c5-82dd0ca95b04	The worst bank I have ever seen in my life.	Saddam Hussein	##########			0	ar	us		1	ar	bad bank ever see life	Negative	1	0	0
Google Play Store	0937aa50-9040-4019-9ebf-171991d22422	Excellent	احمد الخالدي	##########			0	ar	us		5	ar	excellent	Positive	0	0	0
Google Play Store	ce334e36-0fd0-4516-afcc-9e239094919a	The best bank, but the application performance is good. The application version is somewhat old, so if I use it, I feel like I am in 2014. Charging the balance and paying for the internet is easy. They also improved the transfer services and provided a service for sharing PDF files or images. Moreover, the recipient's name appears after adding the IBAN number. Please improve it even more, oh Lord.	اسرار سعد	##########			1	ar	us		3	ar	best bank application performance good application version somewhat old use feel like charge balance pay internet easy also improve transfer service provide service share pdf file image moreover recipients name appear add iban number please improve even oh lord	Positive	1	1	0
Google Play Store	07213559-44ef-408e-b679-77a97e9a6ac9	He is requesting a new update so he can access and check for updates on Google Play.	ahmed as	##########			0	ar	us		1	ar	request new update access check update google play	Neutral	0	1	0
Google Play Store	2bea6430-429c-455f-9909-0ca6242c0a4b	He/she was exceptional.	معاس كيري	##########			0	ar	us		5	ar	heshe exceptional	Positive	0	0	0
Google Play Store	ff34d858-d6a7-411e-ad28-732ccd2b2487	Good	احمد سلطان	##########			0	ar	us		3	ar	good	Positive	0	0	0
Google Play Store	56fd837a-6593-4c31-9af4-27423de3aa91	The level of service provided by the bank is indescribable. It is beyond excellent.	زيد السويطي	##########			0	ar	us		4	ar	level service provide bank indescribable beyond excellent	Positive	1	0	0
Google Play Store	18fb8d07-7fa1-4a77-8023-a12211dc94f5	Excellent	مختار الشعبي	##########			0	ar	us		5	ar	excellent	Positive	0	0	0
Google Play Store	8f437332-4d06-497e-9e78-12fb738140db	Rubbish	MNQ -	##########			0	ar	us		5	ar	rubbish	Neutral	1	0	0
Google Play Store	e3f9ec3e-bc69-45a2-8976-423ac7912afc	Failed bank and a very bad application	حسين حكمي	##########			0	ar	us		1	ar	fail bank bad application	Negative	1	1	0
Google Play Store	d18f1445-d82d-4dae-bbad-04419b22785c	The application is bad and complex in login registration, and its options within the application are limited.	M O S A	##########			1	ar	us		2	ar	application bad complex login registration options within application limit	Negative	1	1	0
Google Play Store	5d087022-82a9-426f-821c-4588ad18f815	I used to see it as the best bank, but after dealing with it for my personal business, I discovered the opposite. The employees in the branches are excellent and have no flaws, but the bank's policies are bad and you have to wait a lot due to the number of employees. Even the bank's electronic transactions are disrupted, so don't rely on them. That's my advice.	Turki Ali	##########			0	ar	us		1	ar	use see best bank deal personal business discover opposite employees branch excellent flaw bank policies bad wait lot due number employees even bank electronic transactions disrupt dont rely thats advice	Negative	1	1	1
Google Play Store	8dd202e7-53f5-4efb-9d86-c3fe2021f2d9	Very good	محمد صديق حامد حسب الرسول	##########			0	ar	us		5	ar	good	Positive	0	0	0
Google Play Store	0af24440-5d34-468a-8d7b-41a45eca54fb	Beautiful	حسن شحاته	##########			0	ar	us		5	ar	beautiful	Positive	0	0	0
Google Play Store	c8239113-39e1-48c7-bc23-83651d7a2e73	Failed program that does not login	احمد	##########			0	ar	us		1	ar	fail program login	Negative	0	1	0
Google Play Store	9842cf46-c1ba-47e2-a99d-7756e0d88b3c	Very distinguished ®	Mohammed Al-Tariqi	##########			0	ar	us		5	ar	distinguish	Positive	0	0	0
Google Play Store	74cda3eb-4bc8-4914-b45a-adc3d56bd42f	Be aware that this application tends to always be worse (from bad to worse).	بسيط البسيط	##########			0	ar	us		1	ar	aware application tend always bad bad bad	Negative	1	0	0
Google Play Store	ea6325d7-25d5-42b4-8a7c-40a88daca203	Easy and smooth	ABO MOHAMMED	##########			0	ar	us		5	ar	easy smooth	Positive	0	0	0
Google Play Store	0c21749c-a01c-4454-9cfa-2b484f0bb442	Can I use this application while I'm in Yemen and can I register in it?	سلسبيل يوسف	##########			0	ar	us		1	ar	use application im yemen register	Neutral	0	1	0
Google Play Store	9f1db717-d650-4011-8f62-07d865bf34ba	Excellent very very thank you	abdo toon	##########			0	ar	us		5	ar	excellent thank	Positive	0	0	0
Google Play Store	7d9846db-926b-499f-af49-d97d49b42ab7	There is a malfunction that has not been fixed for a while.	SAmi Radman	##########			0	ar	us		1	ar	malfunction fix	Negative	0	1	0
Google Play Store	a5ff02e4-1a6d-444c-b900-3cbd3660a7ca	The employees handle customers with skill in terms of responding to inquiries, ability to solve their problems, and in a polite manner.	‪Ahmad “‫أبو مشعل‬‎”‬‏	##########			1	ar	us		5	ar	employees handle customers skill term respond inquiries ability solve problems polite manner	Positive	1	0	0
Google Play Store	b0327c77-1834-4812-b998-427d2bfefcbc	Excellent	M Elfoly	##########			0	ar	us		5	ar	excellent	Positive	0	0	0
Google Play Store	260dd204-80cf-4e82-904d-eb8ef0d54ec6	nice	عمار البكاري	##########			0	ar	us		5	ar	nice	Positive	0	0	0
Google Play Store	98097550-1273-4321-a20e-19dcc5f73f47	Don't make a mistake and open an account with that bad bank. This is an advice.	Stone Boune	##########			0	ar	us		1	ar	dont make mistake open account bad bank advice	Negative	1	0	0
Google Play Store	2ca905b8-2f14-4a9a-b88e-6ed5bc005972	The application doesn't open! It logs in and stops at the stage of sending the verification message, and the message never arrives.	Bushra_bst	##########			2	ar	us		1	ar	application doesnt open log stop stage send verification message message never arrive	Negative	0	1	0
Google Play Store	33ff2cef-6150-4ef5-8a83-0a4170039b34	The worst hangs on."	Myself	##########			0	ar	us		1	ar	bad hang	Negative	1	0	1
Google Play Store	79facda3-a93d-4b69-b61f-365b2daf37a7	There are always problems in the payment system. You cannot pay some bills, you cannot share the receipt, you cannot make a prepayment if you wanted to. The government payment receipt is missing some details. Many problems have arisen in the application after it used to be the best.	khaled alahmad	##########			28	ar	us		1	ar	always problems payment system pay bill share receipt make prepayment want government payment receipt miss detail many problems arise application use best	Negative	0	1	0
Google Play Store	698372e3-9b41-4be8-bc54-38838e97eb43	Wonderful	الهاشمي الحسني	##########			0	ar	us		5	ar	wonderful	Positive	0	0	0
Google Play Store	03f85980-0472-4bd1-9322-681eb4f68930	One star to deliver my comment to you. There is a problem with the international transfer process through Alinma Express. The amount is deducted from the account but it does not reach the beneficiary's account. Please solve this problem as it has happened to me more than 3 times or even more.	أبو أحمد النمر94	##########			6	ar	us		1	ar	one star deliver comment problem international transfer process alinma express amount deduct account reach beneficiarys account please solve problem happen time even	Negative	0	1	0
Google Play Store	6ba531f6-5221-4473-a7ce-4dee4a083def	The application is very slow, it does not open my account for some reason. The latest update is terrible.	اسماعيل العمري	##########			1	ar	us		1	ar	application slow open account reason late update terrible	Negative	0	0	1
Google Play Store	504f7f7c-a688-4114-b04b-3aa378a32059	The worst application on Earth. I'm trying to create an account but unfortunately it says that my number is not registered, and for your information, my number is registered in Absher, Tawakkalna, Nafaz, and all other platforms. This application is the worst. I'm currently deleting it and registering with any other bank.	MO. Abdelwahab 76	##########			2	ar	us		1	ar	bad application earth im try create account unfortunately say number register information number register absher tawakkalna nafaz platforms application bad im currently delete register bank	Negative	1	1	0
Google Play Store	3a109bef-4bcc-4076-96f4-05062a12fb90	I have a lock and it's not opening. When I enter the username and password, it tells me that there was an error. I went to the bank to discuss this issue, but the employees there were very rude, as if you are bothering them. Their way of dealing with customers is extremely offensive, and on top of that, they don't know how to solve the problem.	حذيفه الجابري	##########			0	ar	us		1	ar	lock open enter username password tell error go bank discuss issue employees rude bother way deal customers extremely offensive top dont know solve problem	Negative	1	1	0
Google Play Store	c2e7b9f5-7cdd-4ddc-8981-f4266f3b8a3a	It is very bad, it does not open for registration.	ابو فهد ومحمد	##########			0	ar	us		1	ar	bad open registration	Negative	1	1	0
Google Play Store	23d90c4c-8b62-4a75-a389-03f347a58935	The fee for international transfer to Egypt is 50 riyals excluding tax... I sent a transfer to Egypt 4 months ago and it hasn't arrived yet.	mahmoud adam	##########			0	ar	us		1	ar	fee international transfer egypt riyals exclude tax send transfer egypt months ago hasnt arrive yet	Negative	0	1	0
Google Play Store	8d44e969-5ead-4ef3-b164-61bfbf1c40ab	There is nothing wrong with it.	حـمـد الشريف	##########			0	ar	us		3	ar	nothing wrong	Neutral	1	0	0
Google Play Store	884c03af-2b82-4e3d-b698-052b7c0cb5cb	Honestly, it's an easy service and a smooth application.	mohammd alhdai	##########			1	ar	us		5	ar	honestly easy service smooth application	Positive	0	0	0
Google Play Store	49632998-2a94-4f85-9feb-6740c88e0589	"Very wonderful application."	نايف المالكي	##########			0	ar	us		5	ar	wonderful application	Positive	0	0	0
Google Play Store	58b92ed2-1961-4bad-b01d-763a748d3df9	Masha Allah (an Arabic phrase expressing admiration or awe), bless the Merciful, Alinma Bank has good service.	محمد العبادي	##########			0	ar	us		4	ar	masha allah arabic phrase express admiration awe bless merciful alinma bank good service	Positive	1	0	0
Google Play Store	0ae61942-d7cc-44ac-8a6a-465c3fd3e4be	Excellent!	يحي فقيهي	##########			0	ar	us		5	ar	excellent	Positive	0	0	0
Google Play Store	753de7c2-3d92-4bd9-aef9-2319fd0d3c1b	When I try to open a new account, it says "Error accessing the web."	عمر فتح الباري	##########			0	ar	us		4	ar	try open new account say error access web	Negative	0	1	0
Google Play Store	6b04ee8c-4d74-49c4-b6fa-6c712f8b2d62	Great	خالد السندي	##########			0	ar	us		5	ar	great	Positive	0	0	0
Google Play Store	bee9587c-34f1-4d21-b7b3-57054c123395	A distinctive and easy-to-use application, with regards from Abu Abdullah.	saad saad	2023-01-09 08:56:00			1	ar	us		5	ar	distinctive easytouse application regard abu abdullah	Positive	0	0	0
Google Play Store	8f81c07c-fbb9-4c3a-b86b-49f2e10f1f54	Good	نبيل اليافعي	##########			0	ar	us		5	ar	good	Positive	0	0	0
Google Play Store	3188ed71-c475-40ae-8a59-0b40f20435a7	I need a feature to hide and show current accounts and credit cards, as it is available with the investment account.	ياسر	##########			30	ar	us		2	ar	need feature hide show current account credit card available investment account	Neutral	0	1	0
Google Play Store	a2dedfbe-0442-41f1-ba22-1fb917c734bd	The latest update added a nice feature, creating a password using Arabic characters. This is a beautiful thing from you, honestly. 👍👍❤️	majestic Alshehri	2023-01-07 05:02:00			1	ar	us		5	ar	late update add nice feature create password use arabic character beautiful thing honestly	Positive	1	1	0
Google Play Store	b4bc1876-edfd-41e6-b565-980555c97360	There is a problem with paying the mobile bills for Mobily. When adding the mobile bill for Mobily prepaid, it is added and activated without any issues. However, when paying, a message appears stating that the bill is not added to the payment system. And when paying once, there is always a message saying that the password is incorrect. I hope that this problem can be fixed as soon as possible.	محمد عمران	##########			159	ar	us		3	ar	problem pay mobile bill mobily add mobile bill mobily prepay add activate without issue however pay message appear state bill add payment system pay always message say password incorrect hope problem fix soon possible	Negative	0	1	0
Google Play Store	b5263519-4b6d-4a57-ac30-35a031ba8321	A complex process is involved in renewing an ATM card through self-service machines.	احمد ابوعبدالعزيز	##########			0	ar	us		1	ar	complex process involve renew atm card selfservice machine	Neutral	1	0	0
Google Play Store	98665479-5050-4126-b3bb-998c94d5f1e3	Very good.	حيدر الرشيدي	##########			0	ar	us		5	ar	good	Positive	0	0	0
Google Play Store	4d840309-a25c-42b2-8a6e-6d7306f84992	I liked it a lot.	Mhammad Allegedly	##########			0	ar	us		5	ar	like lot	Positive	0	0	0
Google Play Store	2a28560b-23fa-4d8b-a84e-513a799c7ec9	The application asks for an update, and if I update it, the application does not open at all.	منصور منصور	##########			0	ar	us		1	ar	application ask update update application open	Negative	0	1	0
Google Play Store	e3798cd7-7f75-4cd2-b437-61df5e5c044a	Bad experience, I tried to open a digital account through the computer and through the iPhone application, and finally through Android, but I couldn't do it. This indicates the technological backwardness of this bank, which convinced me that it is the worst of a bank.	Shi Voo	2023-01-05 00:14:00			39	ar	us		1	ar	bad experience try open digital account computer iphone application finally android couldnt indicate technological backwardness bank convince bad bank	Negative	1	1	0
Google Play Store	bbe39ca9-b6c8-4d98-941c-82dfdc015c98	The employees are uncooperative.	حمود العمراني	##########			0	ar	us		1	ar	employees uncooperative	Negative	1	0	0
Google Play Store	475f1e02-7c02-4a5b-967a-b2430ea0e0a2	The best bank in Saudi Arabia.	No Name	##########			0	ar	us		5	ar	best bank saudi arabia	Positive	0	0	0
Google Play Store	7e328e94-029b-47d6-978c-3df4bb39107d	The application was nice, clear, and easy to use, but after the update, the font became small and I don't even know how to use it anymore. I can't even pay from the bill. Unfortunately, the update ruined it and the application became useless.	Dgef Ftseg	2023-01-03 05:00:00			0	ar	us		1	ar	application nice clear easy use update font become small dont even know use anymore cant even pay bill unfortunately update ruin application become useless	Negative	1	1	0
Google Play Store	54f66011-a9ca-4107-ae1e-7b022dfbddf9	How many times does the application reject me?	حسن الناشري	2023-01-03 04:59:00			0	ar	us		1	ar	many time application reject	Negative	0	1	0
Google Play Store	fbf53935-d2dd-4cfd-9015-53da2a90a43f	Amazing so far.	يمني وليا الفخر اليمن	2023-01-03 03:57:00			0	ar	us		1	ar	amaze far	Positive	0	0	0
Google Play Store	17fc22f0-7699-44bc-8011-c35eb003241b	The app Al-Inmaa is excellent.	علي الشمراني	2023-01-02 02:16:00			0	ar	us		5	ar	app alinmaa excellent	Positive	0	0	0
Google Play Store	40699a14-b482-46c7-9ba0-1c1e230ec0c5	The application is excellent. It hasn't been opening on my phone for a while now, and I don't know why. I tried updating it and deleting it, then re-downloading it, but the problem didn't solve. As I'm typing this, I have deleted it again and now I am downloading it again.	بلال التميمي	##########			0	ar	us		5	ar	application excellent hasnt open phone dont know try update delete redownloading problem didnt solve im type delete download	Negative	0	1	0
Google Play Store	81578ca7-9286-4bff-b753-fee6beb57cd9	The latest update is unfortunately bad. Messages are delayed and time is wasted. I may spend half an hour just trying to login. I don't understand why all of this is happening. Greetings.	Eslamovitsh	##########			0	ar	us		1	ar	late update unfortunately bad message delay time waste may spend half hour try login dont understand happen greetings	Negative	1	0	1
Google Play Store	83c4e0bd-3363-43a2-ab64-204269d90b57	Excellent and easy application.	ابو مازن البناقي	##########			0	ar	us		5	ar	excellent easy application	Positive	0	0	0
Google Play Store	10058b0f-8188-4206-9c6d-906226effc40	Best regards to Al-Inma Company.	ياسر احمد	##########			0	ar	us		5	ar	best regard alinma company	Positive	0	0	0
Google Play Store	bf0201e0-cf6f-4ced-97dc-a39bc1aa646f	More than wonderful.	ابو حسين طارق	2023-01-01 03:44:00			0	ar	us		5	ar	wonderful	Positive	0	0	0
Google Play Store	eaeba87a-1f33-421f-a963-860aa8c77213	Their system has many errors (the bank).	عبدالله مصطفى محمد	##########			0	ar	us		1	ar	system many errors bank	Negative	0	1	0
Google Play Store	fd885266-eedb-4844-8f21-567c1193889e	The device is not added to your authenticated devices list	samy derhm	##########			0	ar	us		1	ar	device add authenticate devices list	Neutral	0	1	0
Google Play Store	377da6a8-a1b9-4484-9ddc-31fc0f1feb33	The best and most reliable bank I have seen and it is progressing, God willing.	sayd fawzy	##########			0	ar	us		5	ar	best reliable bank see progress god will	Positive	0	0	0
Google Play Store	9eb30f4a-da06-431c-b38d-c0d3741ecf28	The application does not work outside the kingdom after the update.	Ahmad Shawaheen	##########			0	ar	us		3	ar	application work outside kingdom update	Neutral	0	1	0
Google Play Store	98ae4d00-51be-4110-b132-023658948be9	The current version of the application is very bad and the service provided by the technical side is also very bad. The quick login function does not work for me, and after 21 days of submitting a complaint, the problem has not been resolved. Instead, it has worsened and the quick login service is deleted as soon as I exit the application. I believe that those in charge of the application should …	Mohamed Saad	##########			2	ar	us		1	ar	current version application bad service provide technical side also bad quick login function work days submit complaint problem resolve instead worsen quick login service delete soon exit application believe charge application pay attention opinions comment customers	Negative	1	1	0
Google Play Store	1ea56def-991a-42de-965a-fb485400c049	There is a problem with the application where the transfer details are not written in Arabic.	radwan abdulaziz al-shuabi	##########			0	ar	us		3	ar	problem application transfer detail write arabic	Negative	0	1	0
Google Play Store	1f5daf37-ab5c-4f34-90d3-d2165f2321fb	The code is being delayed in sending and has become heavy.	Abo Gamal	##########			0	ar	us		1	ar	code delay send become heavy	Negative	0	0	1
Google Play Store	738592cd-9b78-4443-b961-74559d2669ce	Very good, excellent.	محمد الشيخ	##########			0	ar	us		5	ar	good excellent	Positive	0	0	0
Google Play Store	be504c29-7515-4809-a096-b4f8814edb3c	"I need an update. It's supposed to be lightweight because it's very heavy."	Mando Mando	##########			0	ar	us		5	ar	need update suppose lightweight heavy	Negative	1	0	1
Google Play Store	36aef2bb-0e1e-41bc-8a70-3a91bea4da5d	Wonderful	المستشار / محمد درويش درويش	##########			0	ar	us		5	ar	wonderful	Positive	0	0	0
Google Play Store	2b7e34b8-fc9d-482b-8d9d-eddf654a6b1d	Very excellent	NASER SAID	##########			0	ar	us		4	ar	excellent	Positive	0	0	0
Google Play Store	83b9a330-3604-4cb7-b2eb-f5e6cb2d659e	A very bad experience. Every time I tried to access the program, it kept asking me to add my mobile number to the authorized devices and calling the bank, and in the end, it would just kick me out.	احمد خباس	##########			0	ar	us		1	ar	bad experience every time try access program keep ask add mobile number authorize devices call bank end would kick	Negative	1	1	0
Google Play Store	00f005fd-6f64-473f-8df1-20f986244a16	Excellent and a good experience with ease of dealing with.	Anas	##########			0	ar	us		5	ar	excellent good experience ease deal	Positive	0	0	0
Google Play Store	5b8ebd33-0c03-4675-9eb4-3b18ea4bce3a	Excellent	خالد ابوربيع	##########			0	ar	us		5	ar	excellent	Positive	0	0	0
Google Play Store	46e25bd1-6f0b-4309-8136-175890763490	One of the best banks in the Kingdom.	MESHRI ALSADUN	##########			0	ar	us		5	ar	one best bank kingdom	Positive	0	0	0
Google Play Store	0ea1c583-45dd-4e35-9cb3-582723d54904	Garbage	Ahmed Ayad	##########			0	ar	us		1	ar	garbage	Negative	1	0	0
Google Play Store	819de871-fff0-4af6-8a57-0434a41521bb	Excellent very very very.	SALAH EDDINE QASEMASHRF	##########			0	ar	us		5	ar	excellent	Positive	0	0	0
Google Play Store	8a0c736f-a7f6-4948-a16a-2fb0c1f41047	Why didn't it open for me when I entered the residency number and password? It says I cannot use the "Alinma" application. I should close the virtual private network (VPN).	ماجد الشعبي	##########			0	ar	us		1	ar	didnt open enter residency number password say use alinma application close virtual private network vpn	Negative	0	1	0
Google Play Store	71fb5eb9-122f-4e55-96eb-aa74eb511f95	Excellent indeed.	خدمة ترميم منازل ”خدمة ترميم منازل مقاول“ مقاول	##########			0	ar	us		5	ar	excellent indeed	Positive	0	0	0
Google Play Store	27f7f4dd-504b-4ca7-9eca-fa6a5be09351	The worst application, its problem is that it doesn't open.	Khaled	##########			0	ar	us		1	ar	bad application problem doesnt open	Negative	1	1	0
Google Play Store	83eab9d4-e9b2-4897-a651-f8a091c08ef7	I have tried a million times to open a current account, but suddenly it kicks me out of the application even when I try online through Google Chrome. I am facing the same problem. Please advise.	ヅبــحــر	##########			0	ar	us		1	ar	try million time open current account suddenly kick application even try online google chrome face problem please advise	Negative	0	1	0
Google Play Store	a82df8e9-d3ce-4675-a452-998591efd423	I can't access my account.. Please solve the problem.	Aman Korkomas	##########			0	ar	us		1	ar	cant access account please solve problem	Negative	0	1	0
Google Play Store	b891861b-779a-49f3-aa23-d5fcb4d8ea00	The application is stuck and won't open, showing a message asking to update to the latest version.... Well, currently this is the latest version, there is no other one, what is the solution??	anfal albuhairi	##########			1	ar	us		1	ar	application stick wont open show message ask update late version well currently late version one solution	Negative	0	1	0
Google Play Store	848e3b19-eada-4bc2-ae2d-13b91477a4d3	The program is garbage, when adding a beneficiary it does not accept and says it already exists while it is not there, and the program does not open on the phone, it says it is not registered.	Faris Alii	##########			0	ar	us		1	ar	program garbage add beneficiary accept say already exist program open phone say register	Negative	0	1	0
Google Play Store	b90404b6-dd7d-4e7d-aa47-081c2e65e7d5	Very good.	صالح المرادي	##########			0	ar	us		5	ar	good	Positive	0	0	0
Google Play Store	7a8aeaf9-9bbd-4ba5-a5af-5743af0a667e	Everything was going smoothly for issuing the digital "Yen Card" until I reached the final stage, which is (Are you subject to taxes...?). Here, I encountered a problem which is an error message saying (The "Enmaa" number was entered incorrectly, it should consist of 11 digits)!!! I wasn't asked for a number and I haven't even opened an account yet. In fact, what I'm filling out is to open a new …	Saleh Al Ghamdi	##########			48	ar	us		1	ar	everything go smoothly issue digital yen card reach final stage subject tax encounter problem error message say enmaa number enter incorrectly consist digits wasnt ask number havent even open account yet fact im fill open new account enmaa assume problem program please fix	Neutral	0	1	0
Google Play Store	ee5b8268-659a-4b5f-b724-9c89fa4755b4	Beautiful	ma Gd	##########			1	ar	us		5	ar	beautiful	Positive	0	0	0
Google Play Store	b0b09176-c677-435c-a40c-3afa35a810d4	Excellent	عامر	##########			1	ar	us		5	ar	excellent	Positive	0	0	0
Google Play Store	f61c3d67-9fca-4d04-b5c2-6d2ff089e40c	Generally, the bank's services are excellent, but after the recent update, I can't share the transfer notification. I hope this issue will be resolved and the option to send notifications via BDF will be added.	osamafarid Geraa	##########			2	ar	us		3	ar	generally bank service excellent recent update cant share transfer notification hope issue resolve option send notifications via bdf add	Negative	0	1	0
Google Play Store	7df4e0c3-afda-4135-bfbb-4c88bd6bfc86	Very bad.	احمد ابوصيام	##########			1	ar	us		1	ar	bad	Negative	1	0	0
Google Play Store	953c52c0-ade2-4050-8dc1-8c54b021858f	Good, and I recommend everyone to download it immediately..... Al-Inmaa ❤️❤️❤️🇸🇦😘❤️	محمد الشرعوب	##########			0	ar	us		5	ar	good recommend everyone download immediately alinmaa	Positive	1	0	0
Google Play Store	5469f075-518f-44e8-81ea-631f5aec93d7	Done	سمير الجهني	##########			0	ar	us		5	ar	do	Positive	0	1	0
Google Play Store	84046c07-7fc0-4857-a901-6948d1ec015e	It is very likely that the device won't be authenticated, even though my device is already authenticated.	Omer Omsan	##########			0	ar	us		1	ar	likely device wont authenticate even though device already authenticate	Negative	1	1	0
Google Play Store	772f77be-5594-4ad9-abf0-b93abeb2c2f1	It used to be smooth and easy, but now it's unbearable. It keeps logging me out, and I can't access it. Everyone is complaining about the instability of your application. What is this, Alinma Bank?	meem 1	##########			0	ar	us		1	ar	use smooth easy unbearable keep log cant access everyone complain instability application alinma bank	Negative	1	1	1
Google Play Store	62e2630e-3c6f-4d88-860d-dff3618febd1	The application is not responsive. 😖	ٍsale	##########			0	ar	us		1	ar	application responsive	Negative	0	0	0
Google Play Store	f1225ce8-3bea-4808-b837-3245b66e57b1	Boring, I cannot access the live stream.	مصطفى بخيت	##########			1	ar	us		1	ar	bore access live stream	Negative	1	1	0
Google Play Store	0f941887-e321-4392-9dbf-e9c48bac33fc	Wonderful	عبدالله الرشيدي	##########			1	ar	us		5	ar	wonderful	Positive	0	0	0
Google Play Store	702565d4-813f-4e5c-b599-6e66e428a861	The application has a problem, and we cannot update it or even install it.	Nashwan Alroiny	##########			0	ar	us		5	ar	application problem update even install	Negative	0	1	0
Google Play Store	eb888748-b3ad-4542-919f-d0bae0f2a28f	Whenever I try to share the transfer receipt, the application crashes and I am unable to share the transfer receipt. I have tried multiple times and the same error keeps occurring.	Mohammed Alharthi	##########			46	ar	us		1	ar	whenever try share transfer receipt application crash unable share transfer receipt try multiple time error keep occur	Negative	0	1	1
Google Play Store	942b47b8-2b2e-4c11-b037-95b3f9954ded	Unfortunately, after the update, when I try to log in, it kicks me out of the application. Every day, I report the issue as urgent, but every day the same problem occurs.	miss u	##########			0	ar	us		2	ar	unfortunately update try log kick application every day report issue urgent every day problem occur	Negative	0	1	0
Google Play Store	98d5a543-3997-4e06-9da6-04515f9fb7cb	It became worse after the update, and when I try to share, the transfer gets out of the system.	نصر الدين	##########			0	ar	us		1	ar	become bad update try share transfer get system	Negative	1	1	0
Google Play Store	16aa0169-6a17-46e2-b927-cea3d4423800	Very bad	abdullrahman ali	##########			0	ar	us		1	ar	bad	Negative	1	0	0
Google Play Store	8a426770-36c9-40c1-aa71-a29cdcab6cec	The application is not working, and it is causing confusion in our work.	ابو عبدالرحمن	##########			1	ar	us		4	ar	application work cause confusion work	Negative	0	1	0
Google Play Store	db374be2-ad2b-4d7e-9ba5-49ead8c00c70	Very nice.	اسير الغربه	##########			0	ar	us		5	ar	nice	Positive	0	0	0
Google Play Store	6f53edaa-1375-4b4c-bd58-1151e44b6e5e	The worst update, unfortunately, the development is declining technically.	Yasser Abuzaid	##########			0	ar	us		1	ar	bad update unfortunately development decline technically	Negative	1	0	0
Google Play Store	b2e3706d-9808-464f-8c12-1e91ab05f337	the worstlication after the update, as when you want to share the conversion process or similar, it automatically closes itself!	khaled Almansour	##########			2	ar	us		1	ar	worstlication update want share conversion process similar automatically close	Negative	0	1	0
Google Play Store	d4817ecf-a366-4b1d-89e0-209ac2827a10	Thank you.	mohammed alsaleh	##########			0	ar	us		5	ar	thank	Positive	0	0	0
Google Play Store	ec11df1e-8563-4dfd-a5b0-61653f1f537a	Excellent very very very	SALEH ALjssary	##########			0	ar	us		5	ar	excellent	Positive	0	0	0
Google Play Store	d61e8fa7-b72a-4755-9380-d8c026c7e1de	Your latest update is bad. It no longer opens, it asks for adding a device but it doesn't get added and it doesn't open... What's the solution?!	عبدالله اليامي	##########			0	ar	us		1	ar	late update bad long open ask add device doesnt get add doesnt open whats solution	Negative	1	1	0
Google Play Store	440b02b4-5e73-4ba0-a469-bbc9998c9d9d	I can't access my account.	محمد ال	##########			0	ar	us		1	ar	cant access account	Negative	0	1	0
Google Play Store	8be72fd2-deda-49af-b04b-727abe02822f	There are many problems, such as now it shows that the mobile phone is not registered, and when approving its registration, it returns back to the starting point again, and so on, more than 8 times.	Nader Awny	##########			0	ar	us		3	ar	many problems show mobile phone register approve registration return back start point time	Negative	0	1	0
Google Play Store	878666fa-967e-411f-ad85-57e7c47d53e0	The application was good before, but when I tried to register the device, the application would not accept it and it does not open at all currently, causing me problems.	nai dunhill	##########			0	ar	us		1	ar	application good try register device application would accept open currently cause problems	Negative	0	1	0
Google Play Store	d9a8e7ed-d0c2-4f3b-a17e-74c73f814675	Very very very good	اسلام احمد	##########			1	ar	us		1	ar	good	Positive	0	0	0
Google Play Store	dbb03f99-c8f6-4a55-b00b-e860254aa269	Good.	أبو بشار	##########			0	ar	us		5	ar	good	Positive	0	0	0
Google Play Store	cfec3fd9-414c-4e06-883a-c1231fa50bb2	Above description	محمد صالح	##########			0	ar	us		5	ar	description	Neutral	0	1	0
Google Play Store	b5932c2b-0484-4921-848e-65fdccd9dfe1	Excellent	سعد المطيري	##########			0	ar	us		5	ar	excellent	Positive	0	0	0
Google Play Store	41c9773c-346b-43ec-b47c-b17c04c67bcd	nice program	أحمد عامر باربود	##########			0	ar	us		5	ar	nice program	Positive	0	0	0
Google Play Store	46c55d9b-6988-47db-bb65-737f407a5838	When making a payment or transferring any amount, when sending the receipt and sharing it, the application suddenly closes.	Amr Amasha	##########			0	ar	us		1	ar	make payment transfer amount send receipt share application suddenly close	Neutral	0	1	0
Google Play Store	0b3e9db9-65a8-4f94-91ea-2c996407dc43	Fine/good.	نواف محمد محمد الجبري	##########			0	ar	us		5	ar	finegood	Positive	0	0	0
Google Play Store	a8e7d9cb-2d00-44b2-9798-220ce6e3cea2	"I sent to Yemen and the message or the remittance number has not arrived until now, it has been a week."	عبدالله الخولاني	##########			0	ar	us		1	ar	send yemen message remittance number arrive week	Negative	0	1	0
Google Play Store	f1083ca1-5c5f-4ea9-9de2-34523daf5ab5	The application is not working, it is as unsuccessful as their services. Even their phone communication does not serve you well, and they never resolve your problem. I left the bank and felt relieved from them.	ابوفيصل السليم	##########			1	ar	us		1	ar	application work unsuccessful service even phone communication serve well never resolve problem leave bank felt relieve	Negative	1	1	0
Google Play Store	417a9140-2496-4d29-88e2-798dbe6e557e	The latest update is the worst and it has messed up my affairs, especially with regards to the application transfer. It doesn't open, find a solution quickly. This is what the application tells me when registering: "The process is not completed, dear partner. There is an error in the system. Please try again later."	بو شهد	##########			3	ar	us		1	ar	late update bad mess affairs especially regard application transfer doesnt open find solution quickly application tell register process complete dear partner error system please try late	Negative	1	1	0
Google Play Store	795ae2f4-0404-40b5-89ea-61b6676f5abf	"I became a failure when I wanted to transform into a person who receives a message and enters the code, but the message doesn't come, and nothing happens. I have become a failure, unable to reach any limits. Please solve this problem."	saif haddad haddad	##########			0	ar	us		1	ar	become failure want transform person receive message enter code message doesnt come nothing happen become failure unable reach limit please solve problem	Negative	0	1	0
Google Play Store	f8e340ec-5320-487b-9f85-c65de0c6cb94	Excellent service	١# ٢#	##########			0	ar	us		5	ar	excellent service	Positive	0	0	0
Google Play Store	bdd5bc2d-5a91-4704-b56d-bc895e4071de	The bank is bad, especially the customer service employees. When a problem occurs and we contact them, the problem is not resolved until a late period that exceeds 10 days. They respond.	ابو صالح	##########			2	ar	us		1	ar	bank bad especially customer service employees problem occur contact problem resolve late period exceed days respond	Negative	1	1	0
Google Play Store	5035644c-0d34-4e0c-92ab-c0e189115912	Very wonderful	Mosa Algahdary	##########			0	ar	us		5	ar	wonderful	Positive	0	0	0
Google Play Store	c5ae921c-4c48-4959-9d41-8240a92f9285	Bad and failure	ساكن مكة الحضرمي	##########			1	ar	us		1	ar	bad failure	Negative	1	1	0
Google Play Store	451430ee-1327-4db5-b285-63caf5580fcd	The application is not working, why? When I tried to log in quickly, it didn't log in. And when I tried to create a new login, it didn't log in. Please activate the application.	حامد ابراهيم صالح	##########			0	ar	us		5	ar	application work try log quickly didnt log try create new login didnt log please activate application	Negative	0	1	0
Google Play Store	6033aeeb-5e1b-49ef-92c7-ac98675edbd7	Why has he become such a failure? It's a shame, he used to be great. Every time he logs in, it says "wrong"! What is the solution?	ابتسام عبدالعزيز	##########			0	ar	us		1	ar	become failure shame use great every time log say wrong solution	Negative	1	1	0
Google Play Store	d4e4b6cc-ff7d-4388-a2f7-1e331ecad3e7	Excellent, but there are issues when you try to transfer and share the process, the program shuts down. Please resolve this issue.	علاء عبدالمالك	##########			1	ar	us		5	ar	excellent issue try transfer share process program shut please resolve issue	Negative	1	1	0
Google Play Store	07a8dcff-5316-4fc6-b1eb-ceae02ca8f1c	By Allah, the latest update is like garbage exactly.	محمد آل مطاعن	##########			0	ar	us		1	ar	allah late update like garbage exactly	Negative	1	0	1
Google Play Store	c2ebee46-a4e2-4563-bccd-1d9e44e08544	What's the deal with the application? It kicks me out as soon as I log in and doesn't open?	عواطف الخديدي	##########			0	ar	us		1	ar	whats deal application kick soon log doesnt open	Negative	0	1	0
Google Play Store	d385be0c-4707-458d-ad43-c902d2a0fcf3	Very wonderful	بشير القاضي	##########			0	ar	us		5	ar	wonderful	Positive	0	0	0
Google Play Store	58716dc1-c538-46fc-8504-e2b2faa30d46	Always a delay in receiving the activation code.	Rami susi	##########			1	ar	us		3	ar	always delay receive activation code	Negative	0	0	1
Google Play Store	08e5c171-78aa-4f0f-a667-625eb8fd6db2	Excellent and easy to use.	Musad Almansoor	##########			0	ar	us		5	ar	excellent easy use	Positive	0	0	0
Google Play Store	6a97b054-5f19-431e-97ad-92c7e6fbc043	I have a problem. The program refuses to start after the recent updates. It has become garbage.	مختار القحطاني	##########			0	ar	us		1	ar	problem program refuse start recent update become garbage	Negative	0	1	1
Google Play Store	39db53f3-2f5f-497a-b1bf-07cabbf0b5ca	I also have the same problem. I can't log in again and I tried deleting the application but I still encounter the same problem.	سناء الغامدي	##########			2	ar	us		1	ar	also problem cant log try delete application still encounter problem	Negative	0	1	0
Google Play Store	58ac210f-1440-4145-8935-70a2ecde2180	The program is not opening as soon as I click on it. It only works on iPhone devices, but not on Samsung devices.	Abood Shehab	##########			0	ar	us		1	ar	program open soon click work iphone devices samsung devices	Negative	0	1	0
Google Play Store	dac1d440-8a41-4846-a1f4-76829a256897	After the latest update of the application, it does not open.	Amr Abdullah	##########			0	ar	us		1	ar	late update application open	Negative	0	1	0
Google Play Store	f97265f9-971a-4319-8f94-657366c19592	The application was great but now it doesn't open on the mobile. Can we know what the problem is or can we request Alinma Bank to solve this issue?	ابو مويد	##########			0	ar	us		1	ar	application great doesnt open mobile know problem request alinma bank solve issue	Negative	0	1	0
Google Play Store	5ea79eed-2a63-4f5c-b0c6-5daacb3d5542	Very bad, either it doesn't open the application or it asks to wait until the application developer updates it.	mohammad alahmadi	##########			0	ar	us		1	ar	bad either doesnt open application ask wait application developer update	Negative	1	1	0
Google Play Store	17b5ffe2-e4b5-4529-9e97-12e5fefba9d6	"I am in Bahrain and before I used to enter from Riyadh, the verification messages do not enter and now it does not open at all. I am really stuck."	R Omar	##########			1	ar	us		1	ar	bahrain use enter riyadh verification message enter open really stick	Negative	0	1	1
Google Play Store	e264a9a5-7c24-49dc-9b08-5037a7e131c4	He refuses to enter the program.	Abdo Salawi	##########			0	ar	us		1	ar	refuse enter program	Negative	0	1	0
Google Play Store	3a8f992f-ac8b-46ec-b5c0-56279e74cccc	The application does not open at all with me, I don't know what the reason is.	ayman alrashed	##########			0	ar	us		1	ar	application open dont know reason	Negative	0	1	0
Google Play Store	2d6d2ae1-7620-464b-8a85-31508c45703e	It is not opening.	Heba 677	##########			0	ar	us		1	ar	open	Neutral	0	1	0
Google Play Store	b52e76d3-d641-42ed-8b0c-b82caf9a2b41	Very bad.	مومن ابراهيم	##########			0	ar	us		1	ar	bad	Negative	1	0	0
Google Play Store	8f10f1e7-a8a6-4b61-9e5c-90cedc8aed38	Dear friends, the application has been causing me trouble. The application does not open. I have uninstalled it and reinstalled it, but the same problem persists.	mohamad mostafa	##########			56	ar	us		1	ar	dear friends application cause trouble application open uninstalled reinstall problem persist	Negative	0	1	0
Google Play Store	7e6e0130-bcdc-4dc6-9ac3-00c87159933d	At first, it was beautiful.. Now, it is very bad. Just by clicking on it to open, it closes immediately and an application message appears saying it is not responding. We have tried updating, deleting, and reinstalling it. But it's the same. And when it does open, when I wait for the password to be sent to enter, the time runs out and the password is not sent.. I don't know what is going on with …	Deaa Sayyd	##########			34	ar	us		1	ar	first beautiful bad click open close immediately application message appear say respond try update delete reinstall open wait password send enter time run password send dont know go application please fix resolve issue	Negative	1	1	0
Google Play Store	a20d4abb-6320-447a-93d3-de369a641588	The application has completely stopped and is not working. We kindly request a solution to the problem as quickly as possible.	Mohamed Ali	##########			3	ar	us		2	ar	application completely stop work kindly request solution problem quickly possible	Negative	0	1	0
Google Play Store	f22a85dc-ff54-4aa4-b60c-208c21eba460	It does not deserve even a star. Other banks are competing to satisfy the customer, while unfortunately, Alinma Bank does not keep up with the progress our country is witnessing in all fields. We hope that the developers of this application quickly address this problem. I gave you one star out of pity for your condition.	حامد الحامد	##########			1	ar	us		1	ar	deserve even star bank compete satisfy customer unfortunately alinma bank keep progress country witness field hope developers application quickly address problem give one star pity condition	Negative	1	0	0
Google Play Store	47bddf22-8593-4c05-87dd-51912c0a82e3	There are errors in the application, please correct them, and I cannot add a new beneficiary???!!!	A& H	##########			1	ar	us		1	ar	errors application please correct add new beneficiary	Negative	0	1	0
Google Play Store	f9195f25-3fde-4398-a74f-b2d4c61f3e91	After installation, when opening the application, it exits and the login page does not appear.	Sayed Lotfy	##########			0	ar	us		1	ar	installation open application exit login page appear	Neutral	0	1	0
Google Play Store	3ff31b62-33d0-4963-8d5c-d4d8fd4757bc	"I hope the technical malfunction can be fixed because I am unable to access the application due to a glitch that has been persisting for several days."	EQZ -7	##########			0	ar	us		3	ar	hope technical malfunction fix unable access application due glitch persist several days	Negative	0	1	0
Google Play Store	b138ffa1-71b1-47af-8e96-150c55781df5	The latest update is very, very, very bad. It refuses to open the application. Find a solution for us and fix our issue. 🥴	سهيل ابو سلمان	##########			0	ar	us		1	ar	late update bad refuse open application find solution us fix issue	Negative	1	1	0
Google Play Store	f2a89a4c-c796-4f66-9d50-16ebe8676341	Failure	Wafi	##########			0	ar	us		1	ar	failure	Negative	0	1	0
Google Play Store	114557a9-7b0f-455c-b63c-d34a51e00df2	There is a problem with the application, it is not working on Android 13 Samsung.	سليمان الفيفي	##########			0	ar	us		1	ar	problem application work android samsung	Negative	0	1	0
Google Play Store	03467f97-fc70-403b-8255-36d668143848	Good	احمد الزقزوقي	##########			0	ar	us		5	ar	good	Positive	0	0	0
Google Play Store	a4f0e0ea-9cd6-4eac-8613-d541a5d291eb	The application is not working and there are no updates available.	صلاح صلاح	##########			2	ar	us		1	ar	application work update available	Negative	0	1	0
Google Play Store	22a4bffd-6a65-4bca-b513-fbaddaa0d744	The recent update is extremely sterile.	شركة اضافات الجزيرة للمقاولات	##########			0	ar	us		1	ar	recent update extremely sterile	Negative	1	0	0
Google Play Store	659b2e03-9392-4ec6-ab17-a6267351002d	Excellent!!	اصيل حاتم	##########			0	ar	us		5	ar	excellent	Positive	0	0	0
Google Play Store	f68bced0-ef15-400d-b164-8ba20a03cea5	The program is malfunctioning.	wesam mageed	##########			0	ar	us		1	ar	program malfunction	Negative	1	1	0
Google Play Store	bedca089-3e41-4ecb-b2db-b865c05e6889	After the latest update, the application is not opening. I wish they hadn't made any changes. 🤣	عبودي عبودي	##########			1	ar	us		1	ar	late update application open wish hadnt make change	Negative	0	1	0
Google Play Store	5fd7242a-21b8-4ca7-a187-788009f13b8d	Cannot access the application after the latest update.	maha alwakeel	##########			0	ar	us		1	ar	access application late update	Negative	0	1	0
Google Play Store	2362de25-36e2-480b-8a39-0560fee4362e	Very bad	Abo Jana	##########			0	ar	us		1	ar	bad	Negative	1	0	0
Google Play Store	16ea8fa7-cbdc-4a68-bc1d-2bf28b8f9649	I cannot access the application and it disappears as soon as I open it.	abdelmonem taha	##########			0	ar	us		4	ar	access application disappear soon open	Negative	0	1	0
Google Play Store	9938631b-1066-4815-919e-e93ea69304dc	I couldn't login, my phone tells me there is a software problem with the application and I have to wait for a new update from the developers to fix the error.	ابوحميد	##########			1	ar	us		1	ar	couldnt login phone tell software problem application wait new update developers fix error	Negative	0	1	0
Google Play Store	e16e1310-31b7-47f9-b659-291449084288	The last update will be.	مؤسسة اللمعة المثيرهـ لخدمات السيارات	##########			0	ar	us		1	ar	last update	Neutral	0	1	0
Google Play Store	b4dc29c1-ef01-45b8-8f42-4e985eabefd3	The new update got stuck in the application and made it not open.	الغامدي حسن	##########			1	ar	us		1	ar	new update get stick application make open	Negative	0	1	1
Google Play Store	9d06e1ed-54ef-47b9-b39d-b8046408e64f	the worstlication that you cannot log into. You wait for 5 minutes for it to send the code, and in the end, you still can't enter the application. This is a bad start, there is no benefit.	طه نجيب	##########			0	ar	us		1	ar	worstlication log wait minutes send code end still cant enter application bad start benefit	Negative	1	1	0
Google Play Store	489b8f0e-04a9-4cba-922a-701926dfb3e1	The latest update is the worst: 1. Delay in sending messages until the specified time ends. 2. Does not respond to fast login. 3. Does not support sending messages when performing banking operations (transfers and payments). A very annoying application and very complicated banking services. Learn from Al-Ahli and Al-Riyadh Bank application.	Sami Aljohni	##########			19	ar	us		1	ar	late update bad delay send message specify time end respond fast login support send message perform bank operations transfer payments annoy application complicate bank service learn alahli alriyadh bank application	Negative	1	0	1
Google Play Store	28970bce-225a-4c31-8288-05f211e0092f	I cannot open the application on my mobile.	Esam Eltager	##########			0	ar	us		3	ar	open application mobile	Negative	0	1	0
Google Play Store	0e6b156a-9236-4146-86f6-afec6f38a16e	A very bad application, I do not recommend downloading it.	محمد الاهلاوي	##########			0	ar	us		1	ar	bad application recommend download	Negative	1	0	0
Google Play Store	aab02801-637a-4693-b1f9-502e55528070	OK	تو مي	##########			0	ar	us		5	ar	ok	Positive	0	0	0
Google Play Store	378c92cd-6ca8-488c-8c01-9c51625f1d43	Under trial, the application does not open for me. What is the problem?	سليم القائدي	##########			0	ar	us		1	ar	trial application open problem	Negative	0	1	0
Google Play Store	6a223ff5-4fc9-4662-92f7-5e12c89251d2	It has been a month now. I have submitted two complaints because I couldn't log into the Alinma app due to a problem with the bank. The device is not recognized by the bank. My question is, what is the issue with the device?	هرماس	##########			0	ar	us		1	ar	month submit two complaints couldnt log alinma app due problem bank device recognize bank question issue device	Negative	0	1	0
Google Play Store	52cd3af2-a90a-4efd-b554-4252f489ef63	Excellent, deserves 5 stars.	الهاجس اليامي (الهاجس)	##########			0	ar	us		5	ar	excellent deserve star	Positive	0	0	0
Google Play Store	180224b0-b792-4d44-95e2-94b3f0bc391f	After the update, there is an issue with sharing the transfer notification. The application is logging out. Please solve the problem.	Azez Assad	##########			0	ar	us		1	ar	update issue share transfer notification application log please solve problem	Negative	0	1	0
Google Play Store	87390609-e87d-401c-9e16-e152b5f64064	Very excellent! Peace be upon you and God's mercy and blessings. Brother, I have a note after the update. The application works perfectly when converting, but when you want to print the invoice and send it, the desired applications do not appear.	الرائد	##########			0	ar	us		5	ar	excellent peace upon gods mercy blessings brother note update application work perfectly convert want print invoice send desire applications appear	Positive	0	1	0
Google Play Store	bb924c76-032e-415a-8250-ce5c84ab3b65	Since yesterday, the application is not opening. I deleted it and reinstalled it, but the same problem persists.	ابو ساره	##########			0	ar	us		1	ar	since yesterday application open delete reinstall problem persist	Negative	0	1	0
Google Play Store	a431321b-83a3-4f70-bcca-af0f87d73eaf	Excellent	Mohammed aljonaid	##########			0	ar	us		5	ar	excellent	Positive	0	0	0
Google Play Store	0f9c8a53-9804-449a-b3f3-285e53f1b10f	There is a problem with the application, it is not working.	Karam 10090	##########			0	ar	us		5	ar	problem application work	Negative	0	1	0
Google Play Store	4f5ce485-93c4-48d8-a7b0-5f376d767464	The application refuses to send the transfer transactions. Please fix the issue.	Yahya Alahmadi	##########			0	ar	us		1	ar	application refuse send transfer transactions please fix issue	Negative	0	1	0
Google Play Store	e513b8e5-a29d-4c2e-bd3a-f77be1201777	The application is no longer working after the update. Please fix the issue urgently.	Moh Eae	##########			2	ar	us		1	ar	application long work update please fix issue urgently	Negative	0	1	1
Google Play Store	45637108-7ab4-435b-9959-153b831e7017	What's wrong with the application? Fixxxxxx itttttttt!	ابو مؤيد	##########			0	ar	us		1	ar	whats wrong application fixxxxxx itttttttt	Negative	0	1	0
Google Play Store	4363a82a-4f04-4e73-bbf5-d5e30d396b0f	The application doesn't open at all. I have tried all possible methods.	Ibrahim Alsaedi	##########			1	ar	us		1	ar	application doesnt open try possible methods	Negative	0	1	0
Google Play Store	248d1e00-cb0c-4620-a199-16dfdd163bd1	After the new update, the Android application logs me out immediately when I access the website from the web. It asks me for the activation code, then I receive a call on an unregistered device, I say okay and it logs me out automatically. Find a solution for us, it's so frustrating! 🤬	Yaser Yaser	##########			1	ar	us		1	ar	new update android application log immediately access website web ask activation code receive call unregistered device say okay log automatically find solution us frustrate	Negative	1	0	0
Google Play Store	96ad3ec6-92bb-4430-be59-b34fe7be5038	The application is not working at all on Samsung S22 Ultra with Android 13 version 🤬	Zead HJ	##########			1	ar	us		1	ar	application work samsung ultra android version	Negative	0	1	0
Google Play Store	32710dee-74e3-42f1-b880-6915c3729772	The application is not working.	03LI	##########			0	ar	us		1	ar	application work	Negative	0	1	0
Google Play Store	0b19d042-41fb-48ec-8ecd-c308da555e7e	The latest update does not open at all, and the Note 20 Ultra.	Rashad Alhuthaifi	##########			0	ar	us		1	ar	late update open note ultra	Negative	0	1	0
Google Play Store	3863ecb8-1bff-4065-8700-ed82d25103b6	The app does not open for me. Find a solution to the problem as soon as possible.	الجمالي الجمالي	##########			2	ar	us		1	ar	app open find solution problem soon possible	Negative	0	1	0
Google Play Store	d87f8556-4063-4a4c-ad91-2625115b1b1e	There is a problem with the application, it is not working now.	Man	##########			1	ar	us		1	ar	problem application work	Negative	0	1	0
Google Play Store	b14f68ce-2928-46d6-9097-0aadf9acba38	The application is very bad, it doesn't open at all.	AHMED IBRAHIM	##########			0	ar	us		1	ar	application bad doesnt open	Negative	1	1	0
Google Play Store	c71f4027-855f-492c-98f4-0d3b82c35ec5	The application doesn't open with me.	Abdulelah Zain	##########			0	ar	us		1	ar	application doesnt open	Negative	0	1	0
Google Play Store	d5d9a16a-9e65-4323-9ded-184e135c2854	fdsf	حروف الغلا	##########			0	ar	us		1	ar	fdsf	Neutral	0	0	0
Google Play Store	1546a007-08a8-4ffd-8b89-ac85c4fe2cab	The application has a problem, it won't open for me.	Hassan Aideed	##########			1	ar	us		1	ar	application problem wont open	Negative	0	1	0
Google Play Store	024ad910-5f4c-4429-a40f-79fb41dac6b1	The application does not open with the new update. Why 😵‍💫😵‍💫😵‍💫	ام عاصم	##########			0	ar	us		1	ar	application open new update	Negative	0	1	0
Google Play Store	53a60e14-5054-4a0f-9fd5-33f4bff4dfdb	The application is not currently working.	Mohamed Mohamed	##########			0	ar	us		1	ar	application currently work	Negative	0	1	0
Google Play Store	1f70f66f-3f62-4b00-9ae0-02d04f53f81a	The application refuses to open even after I deleted it and reinstalled it, it still doesn't open.	abu mubarak M	##########			0	ar	us		1	ar	application refuse open even delete reinstall still doesnt open	Negative	0	1	0
Google Play Store	acc7630d-9cb3-4072-b365-38fa5b6e90cc	It doesn't work.	وسااام	##########			0	ar	us		1	ar	doesnt work	Negative	0	1	0
Google Play Store	bb6804de-b43b-48a5-8440-e4bd3c913fd4	I cannot access the application.	أبو ليث الهاشمي	##########			0	ar	us		5	ar	access application	Negative	0	1	0
Google Play Store	0a47c292-cfeb-4192-81f7-d68bd13c041e	The application refuses to open.	عبدالرحمن الهديب	##########			0	ar	us		1	ar	application refuse open	Negative	0	1	0
Google Play Store	0f42b528-0c72-4778-ad52-6758cee72874	The latest update removes you from pronouncing, pronouncing, pronouncing, and you do not even enter the correct pronunciation for the development at all. 😨 It's frightening. 😱	Goo Away	##########			0	ar	us		1	ar	late update remove pronounce pronounce pronounce even enter correct pronunciation development frighten	Negative	1	1	0
Google Play Store	7f7817b3-e95d-49af-8a11-eb4c54fe4d87	The program is unfortunately not working.	أبو راكان	##########			0	ar	us		1	ar	program unfortunately work	Negative	1	1	0
Google Play Store	72cb138d-1ee4-454f-9b75-70854dff41ba	The application is not working at all after the latest update.	AHMAD ALSHAMMRI	##########			2	ar	us		1	ar	application work late update	Negative	0	1	0
Google Play Store	a25ec9e4-dd1b-4d9c-a1c2-7a3bad143de5	The update is bad.	hatem kamal	##########			0	ar	us		1	ar	update bad	Negative	1	0	0
Google Play Store	63d36feb-ac84-4405-be6e-6259b01c3ace	Like shit, I can't enter.	SALEM ALBISHI	##########			0	ar	us		1	ar	like shit cant enter	Negative	1	1	0
Google Play Store	3e48befc-0f67-484f-bddb-089eba311f24	After the latest update, the application does not open at all.	Rayan A	##########			0	ar	us		1	ar	late update application open	Negative	0	1	0
Google Play Store	56f2250a-2d93-4000-87f3-9132331f88d3	Today, after the update, I can no longer log in.	malmousa الموسى	##########			1	ar	us		1	ar	today update long log	Negative	0	1	0
Google Play Store	e5b268ef-65ee-403b-9ec5-ee8d728ebcb3	It is very difficult compared to others.	خالد ابراهيم	##########			1	ar	us		1	ar	difficult compare others	Negative	1	0	0
Google Play Store	340b248c-7125-4464-9de3-45ad26170b96	The application does not reflect the advanced banking services. The bank is technologically outdated.	عبد السلام عبدالله	##########			0	ar	us		1	ar	application reflect advance bank service bank technologically outdated	Negative	1	0	0
Google Play Store	80c5a7b2-6551-453d-b347-4f78e7086b8e	the worstlication and those who made it are also worst.	alaam algoepyssy	##########			0	ar	us		1	ar	worstlication make also bad	Negative	1	0	0
Google Play Store	271fc79a-60d5-478f-a95d-e4c249bb2f39	The application will collapse.	MONSTER GMAER plus	##########			0	ar	us		1	ar	application collapse	Negative	1	1	0
Google Play Store	9f4ebe5c-43ed-4741-9405-32642c229fa1	The application does not open, it shows me there is an error in the application.	Saleh ALG	##########			0	ar	us		5	ar	application open show error application	Negative	0	1	0
Google Play Store	28803db4-a324-4269-95a5-e1365b74bf89	Problem with the latest update 1.6.7, it closes immediately after opening the application.	mohammed aljamal	##########			2	ar	us		5	ar	problem late update close immediately open application	Negative	0	1	0
Google Play Store	de4c6212-7ba7-42bf-b9b2-def46721c468	"Don't update, because the application doesn't work after the update."	علي جابر	##########			1	ar	us		1	ar	dont update application doesnt work update	Negative	0	1	0
Google Play Store	b7398b30-e530-4e72-b7ed-090bf2e4ded1	Very beautiful.	Saleem Mansoor	##########			0	ar	us		5	ar	beautiful	Positive	0	0	0
Google Play Store	216dc179-a056-40a5-8374-46591e8d4552	nice	أبو صالح	##########			0	ar	us		5	ar	nice	Positive	0	0	0
Google Play Store	eae9c9b3-433d-4cc9-ad79-20890515dd60	Not good. The service is really bad. Honestly, I am surprised by Alinma Bank, why is their application of such poor quality??? It doesn't deserve even a quarter of a star until the existing errors are fixed.	مكتب المحامي إبراهيم مضحي العنزي	##########			8	ar	us		1	ar	good service really bad honestly surprise alinma bank application poor quality doesnt deserve even quarter star exist errors fix	Negative	1	1	0
Google Play Store	df0b6806-ce0b-4374-9c27-47c85563aa85	I cannot log in from my other mobile; there is a malfunction in the latest update.	عبدالله الغامدي	##########			0	ar	us		1	ar	log mobile malfunction late update	Negative	0	1	0
Google Play Store	43f19bdd-0ac7-400d-97ee-0584bc51bd0b	Failed application and failed bank in everything.	r R	##########			0	ar	us		1	ar	fail application fail bank everything	Negative	0	1	0
Google Play Store	9410ce38-bf9c-45af-960f-4a62ea56e6ac	Very bad, as we cannot enter and also unjustified for a bank to do such a thing. It is forbidden for you, the bank. It is very weak.	Khaled Al-tayyeb	##########			0	ar	us		1	ar	bad enter also unjustified bank thing forbid bank weak	Negative	1	0	0
Google Play Store	f7d15487-70b4-48bd-bb66-e02493c77aaf	Very good.	Abdelaali Mokhlis	##########			0	ar	us		5	ar	good	Positive	0	0	0
Google Play Store	3d8ff37f-4565-4a98-a847-5275c6cfa7d9	The application is heavy and doesn't open.	Abo Ali	##########			0	ar	us		5	ar	application heavy doesnt open	Negative	0	1	1
Google Play Store	6d6c7858-9eae-4890-81b0-2cbe45669c8d	There is no power or might except in Allah. Every time I speak, things get worse than before. I refused to open the application with me. Allah is sufficient for me, and He is the best of representatives.	ابو محمد	##########			0	ar	us		1	ar	power might except allah every time speak things get bad refuse open application allah sufficient best representatives	Negative	1	0	0
Google Play Store	99c82627-3b6b-44d3-b941-e631003d3652	He does not download the application and says there is an error.	ابو عبدالعزيز	##########			0	ar	us		1	ar	download application say error	Negative	0	1	0
Google Play Store	ee2fadcf-5a79-4859-b2bf-f3e845f36145	The application is not working after the latest update. Please solve the problem as soon as possible. 🥺	Gihad Obaed	##########			0	ar	us		5	ar	application work late update please solve problem soon possible	Negative	0	1	0
Google Play Store	1b6e7841-39e8-4c82-aa49-23706489afa2	After the recent update, I am unable to access the program from my mobile. I kindly request you to address the issue urgently.	Mr Yazeed	##########			0	ar	us		1	ar	recent update unable access program mobile kindly request address issue urgently	Negative	0	1	0
Google Play Store	9cf24777-2ed8-4bf1-bf80-977bd2929a7d	After the update, the application does not work.	Mohammed Suliman	##########			1	ar	us		1	ar	update application work	Negative	0	1	0
Google Play Store	572a2819-460b-4d80-b0ba-86a70cf5e928	After the latest update, the application refuses to open???????	محمد يحيى	##########			1	ar	us		1	ar	late update application refuse open	Negative	0	1	0
Google Play Store	7e3a9ad8-2b52-441e-a393-9aca6ea099b9	All the banks have the option to update the ID from the application except for you, you have to physically go to the branch. What a hassle!	عساف الحربي	##########			0	ar	us		1	ar	bank option update id application except physically go branch hassle	Negative	0	1	0
Google Play Store	30e598ec-76e3-4e3f-a336-4a36bcd068e1	Doesn't work on Android 13	Ok. Al-Ghamdi	##########			1	ar	us		1	ar	doesnt work android	Negative	0	1	0
Google Play Store	c0c818cd-dfaa-45de-bd14-b5a2f84b82c8	Excellent and smooth electronic services.	Salah Najdi	##########			0	ar	us		5	ar	excellent smooth electronic service	Positive	0	0	0
Google Play Store	8036be62-dcf3-4e96-9437-7ac56a7046e0	The program requested an update and after the update, it does not open at all, and it gives a message saying there is a technical error, wait for the developers to fix it, and then try updating again.	badawi dash	##########			2	ar	us		1	ar	program request update update open give message say technical error wait developers fix try update	Negative	0	1	0
Google Play Store	fc6ba0a3-ea7d-41fb-a7d7-10b8df26e84b	Excellent	Kalah Alshehri	##########			0	ar	us		5	ar	excellent	Positive	0	0	0
Google Play Store	3482987e-9f82-407f-88ad-552cd9d2293a	There are notes.	Ayman Al Wajeeh	##########			0	ar	us		1	ar	note	Neutral	0	1	0
Google Play Store	fb1796a5-96d9-46ff-be00-3961962a207f	"Failure"	Sameer Othman	##########			0	ar	us		1	ar	failure	Negative	0	1	0
Google Play Store	242cd2c1-c51d-44e8-b01e-5803302aa6b6	Honestly, you are a nice bank, but it's frustrating that the Alinma bank app and its system still have a very traditional interface. Meanwhile, Al Rajhi Bank's design is much nicer in the app. Yes, it's a terrible bank, but it has a strong point in that aspect. I really hope that you change the appearance of the app and improve it to make it much better, so that it becomes smoother and serves bet…	muhannad alshumrani	##########			0	ar	us		3	ar	honestly nice bank frustrate alinma bank app system still traditional interface meanwhile al rajhi bank design much nice app yes terrible bank strong point aspect really hope change appearance app improve make much good become smooth serve good also feature good mean three star frankly lack lot feature al rajhi fine program exist make great progress take look ideas make improvements wish success	Negative	1	0	0
Google Play Store	455abcab-d7f9-4f5c-91d0-8458b2ed09d3	The application doesn't work after the latest update, it refuses to login.	Yaser	##########			4	ar	us		1	ar	application doesnt work late update refuse login	Negative	0	1	0
Google Play Store	5a3178f3-9e57-4b7a-9ace-2bc0259130be	Alinma Bank has completely changed over the past two years and has become the worst bank in the kingdom. I have experienced problems with them, their bad treatment, and the deduction of large amounts from my accounts without any justification. They do not respond or provide any explanation, deliberately ignoring the damage and problems of the client. After that, I closed all my accounts with this…	mazen	##########			0	ar	us		1	ar	alinma bank completely change past two years become bad bank kingdom experience problems bad treatment deduction large amount account without justification respond provide explanation deliberately ignore damage problems client close account bank bank become completely insecure recommend anyone deal	Negative	1	0	0
Google Play Store	0ef5197f-39c9-4a77-b3b6-bb149050b964	Good	ابو يوسف	##########			0	ar	us		5	ar	good	Positive	0	0	0
Google Play Store	bc03f6f0-6baa-4071-9d5b-23a3882e2d9d	The application has become bad.	sahar attas	##########			0	ar	us		1	ar	application become bad	Negative	1	0	0
Google Play Store	86be9a4a-bebc-4baa-9db1-865f92d65252	Good	Ahmed Mashal	##########			0	ar	us		5	ar	good	Positive	0	0	0
Google Play Store	b8d0071b-783d-4d67-9afc-8c5068bb877b	There is development.	النجم الساطع	##########			0	ar	us		3	ar	development	Positive	0	1	0
Google Play Store	1e62bfab-6c9d-42d5-9759-d8b2dc21f378	Can I open an account from my mobile phone through the application without visiting the branch?	عبدالله الشقيري	##########			0	ar	us		3	ar	open account mobile phone application without visit branch	Neutral	0	1	0
Google Play Store	601904ac-495c-4bff-89e6-2be3669607d5	The latest update is very bad... I can't log in from my mobile.	AOA AOA	##########			1	ar	us		3	ar	late update bad cant log mobile	Negative	1	1	0
Google Play Store	48589815-e7ac-47fc-89db-292088937744	The app does not speak and does not load!! What's the solution!! The app is a failure! I deleted it in order to download it again! It refused to download! And it refused to update.	Maher Albadani	##########			1	ar	us		1	ar	app speak load whats solution app failure delete order download refuse download refuse update	Negative	0	1	0
Google Play Store	a84fe9ff-1d47-4ae9-bc81-0d8a3582cdac	Excellent, but there hasn't been an update in a while.	Hsh Ushs	##########			0	ar	us		5	ar	excellent hasnt update	Negative	1	1	0
Google Play Store	cede0632-9e52-46ff-b176-a1a559eb1856	The application is not working.	magnum sky	##########			1	ar	us		1	ar	application work	Negative	0	1	0
Google Play Store	ed553688-280e-43e1-888d-f90518511822	The bank's electronic services are going downhill steadily and strongly......... The bank is losing many of its customers due to the extreme delay in completing services, whether inside the bank or through mobile banking from A to Z.	Nature lover الحياه والطبيعه	##########			1	ar	us		1	ar	bank electronic service go downhill steadily strongly bank lose many customers due extreme delay complete service whether inside bank mobile bank z	Negative	1	0	1
Google Play Store	61a223b2-a2cb-485d-b497-637c714b4f02	It is nice and easy.	محمد محمد	##########			0	ar	us		5	ar	nice easy	Positive	0	0	0
Google Play Store	0896ca38-b8b1-40a6-90b0-ca06189bfcdc	Peace, mercy, and blessings of Allah be upon you all. Regarding the latest update of the application, I am unable to log in, whether it is through quick login or regular login. Is there anyone who can help? The services have been disrupted.	Saad saad	##########			1	ar	us		1	ar	peace mercy blessings allah upon regard late update application unable log whether quick login regular login anyone help service disrupt	Negative	0	1	0
Google Play Store	8328d07c-06e4-4858-9e25-38e2fb7c8d29	"Resignation... the dumbest bank."	Hamed Masaf	##########			0	ar	us		1	ar	resignation dumb bank	Negative	1	0	0
Google Play Store	c5e4f9e9-508b-4147-9661-afd086d4324e	There is a problem with the application. There is a balance in the account higher than what is available, and it gets rejected when trying to make any transfer.	ياسر احمد	##########			0	ar	us		5	ar	problem application balance account high available get reject try make transfer	Negative	0	1	0
Google Play Store	cfe490f8-8ed1-4305-af8b-0328d39db088	Very useful	Fayzah An	##########			0	ar	us		5	ar	useful	Positive	0	0	0
Google Play Store	b8a5ee10-eff1-45f1-9faf-8137b2c87fd2	My experience was very tough.	سيف علي المعمري	##########			0	ar	us		5	ar	experience tough	Negative	0	0	0
Google Play Store	bfeb443f-0f30-41ef-bc93-1848a822088b	All praise be to Allah, the issue has been resolved in the application.	yahya mohammed	##########			0	ar	us		5	ar	praise allah issue resolve application	Positive	1	0	0
Google Play Store	5eb0731b-03ac-4a45-bc53-de4062f9e63c	Beautiful application	mona r	##########			0	ar	us		5	ar	beautiful application	Positive	0	0	0
Google Play Store	c607677f-f098-430d-8b6c-391125072035	I never tried it.	Ail Ail	##########			0	ar	us		5	ar	never try	Neutral	0	1	0
Google Play Store	e660067e-5fb2-4a29-ad8b-f846b93e8747	Excellent very much	Mahmoued	##########			0	ar	us		5	ar	excellent much	Positive	0	0	0
Google Play Store	9ba75a89-06db-416c-9ce1-d4e8cae6ed5c	The worst bank I have ever seen in my life. They are backward and I do not recommend anyone to open an account in this incompetent bank. Trust me, don't waste your time. Their customer service is terrible and the employees have no understanding at all. My sincere respect.	ايمن الفيفي	##########			1	ar	us		1	ar	bad bank ever see life backward recommend anyone open account incompetent bank trust dont waste time customer service terrible employees understand sincere respect	Negative	1	0	1
Google Play Store	ca0d2d33-7ef0-42e6-8b5f-02ff2030bad0	I updated the application, but after updating it, it tells me that I am not registered and asks me to enter the verification code and everything, but the application does not open. I don't know what went wrong after updating the application. Please fix the application.	محمد خالد عطا	##########			1	ar	us		1	ar	update application update tell register ask enter verification code everything application open dont know go wrong update application please fix application	Negative	0	1	0
Google Play Store	78b83631-1155-443a-ae84-7e6b5537fefd	There is a problem after the update.	محمد حسين	##########			1	ar	us		1	ar	problem update	Negative	0	1	0
Google Play Store	86f54712-14e3-4126-a3ef-7b91ac2b4809	Very wonderful/great/amazing.	دارس جعدان	##########			0	ar	us		5	ar	wonderfulgreatamazing	Positive	1	0	0
Google Play Store	4519fc1e-abf4-4048-b336-555cfa74309c	What doesn't open after the update.	bandar alqarni	##########			1	ar	us		1	ar	doesnt open update	Neutral	0	1	0
Google Play Store	2e214cb4-4c04-43c2-9bdf-75ca79afa9ad	It seems to be a common problem after updating the application. I also have trouble accessing the application. Yes, a message appears that your device is not registered and the bank will contact you to register the device, but it is of no use. I hope the application developer takes note of this issue.	Mustafa Ahmed	##########			5	ar	us		5	ar	seem common problem update application also trouble access application yes message appear device register bank contact register device use hope application developer take note issue	Negative	0	1	0
Google Play Store	3c872d6f-b0e0-4868-b420-ae8a6f4fe758	Thank you very much.	Abdulh.yahia Alahjri	##########			0	ar	us		5	ar	thank much	Positive	0	0	0
Google Play Store	25b78c80-3cff-43b3-9630-2aa676413f42	I cannot log in from my mobile device. After logging in, a message appears saying that your mobile device is not registered. Do you want to add it? I chose yes and received a call from Alinma Bank asking me to press a certain number, then the call ends. I try to log in again and the process repeats. I try again and the process repeats. I am noting that Alinma Bank is still calling me.	احمد سيف	##########			153	ar	us		2	ar	log mobile device log message appear say mobile device register want add choose yes receive call alinma bank ask press certain number call end try log process repeat try process repeat note alinma bank still call	Neutral	0	1	0
Google Play Store	528945f6-f9e2-4b8c-892f-81336a6079f6	I cannot access the account and I tried to add my mobile device that was working all the time on the application, but it didn't work.	mix channel وايت آيس موسى	##########			7	ar	us		1	ar	access account try add mobile device work time application didnt work	Negative	0	1	0
Google Play Store	3984d6e0-ca5d-44bd-9aa5-49a644f904ad	The application has become boring and it doesn't open the account on mobile. It says the device is not registered, even though I try to add it, it still doesn't open. 👎👎👎👎👎 Terrible service.	Mustafa Omar	##########			2	ar	us		1	ar	application become bore doesnt open account mobile say device register even though try add still doesnt open terrible service	Negative	1	1	0
Google Play Store	07a6b20b-c47d-4f39-a458-293ec0c152e5	The latest update to device authentication is very bad. The system has contacted me more than ten times to authenticate the device, yet I still cannot access my account.	Dr.Abduallh Alajlan	##########			14	ar	us		1	ar	late update device authentication bad system contact ten time authenticate device yet still access account	Negative	1	1	0
Google Play Store	2581b696-8c2b-4870-9ca9-abfd20fd6676	The program does not work on the Android system.	ن	##########			1	ar	us		5	ar	program work android system	Negative	0	1	0
Google Play Store	60ec884e-3119-4f8e-bb51-86d4870fdab2	The application is amazing. I wish you could add the option to change the mobile number through the application without visiting the branch or the ATM.	منصور عادل	##########			0	ar	us		5	ar	application amaze wish could add option change mobile number application without visit branch atm	Positive	0	1	0
Google Play Store	8fff595a-fe30-4f91-a0c2-4181bbc6ccd0	What is the story behind introducing the device.. to the point of it not being recognized?	34	##########			2	ar	us		1	ar	story behind introduce device point recognize	Neutral	1	0	0
Google Play Store	d635f636-3e04-4a1d-848c-a9afbee25af8	Do you have a solution for accessing the bank? It has become exhausting to authenticate every time and in the end, it doesn't access the application.	Hussain mhammd	##########			2	ar	us		3	ar	solution access bank become exhaust authenticate every time end doesnt access application	Negative	1	1	0
Google Play Store	ea3c8ab4-4cfc-45b9-8439-d64b5cde4ec3	The application has become a failure. Every time I enter, it says the device is not registered. 😡😡👎	NoOone N	##########			2	ar	us		1	ar	application become failure every time enter say device register	Negative	0	1	0
Google Play Store	9ffe11ad-9528-472f-b8ea-c44dc67fd31f	I haven't changed my device, it's showing me a message from a new device that I have a bad application unfortunately. How do we manage our financial matters? And before that, it was suspended for a month, I was only dealing through exchange offices.	noha alhafez	##########			2	ar	us		1	ar	havent change device show message new device bad application unfortunately manage financial matter suspend month deal exchange offices	Negative	1	1	1
Google Play Store	12ca8c5f-db15-4984-be79-ad5c1c888f9e	"Add and manage your authenticated devices to log in to your account through digital channels. Due to this update, I am unable to log into the application and know my devices. Moreover, it does not allow me to log in even after multiple attempts. I have experienced the same issue several times, and so far, I cannot access the application. It would be great if you could remove this problem. You us…	roza R	##########			6	ar	us		1	ar	add manage authenticate devices log account digital channel due update unable log application know devices moreover allow log even multiple attempt experience issue several time far access application would great could remove problem use good	Negative	1	1	0
Google Play Store	b0609c1e-a886-46ac-85a1-4117c33403d0	The best banking program is this, thank you Alinma.	ابوطلال للزراعة المائية	##########			0	ar	us		5	ar	best bank program thank alinma	Positive	0	0	0
Google Play Store	9260ce04-fe15-4f66-95dc-78f80e021418	I cannot access my account and I cannot use my mobile.	محسن القرني	##########			3	ar	us		1	ar	access account use mobile	Negative	0	1	0
Google Play Store	52b136f3-ffb8-49e1-8521-444262c17d04	The worst banking application compared to other banks. I find it difficult to access my account. It requires device authentication, and after authentication, it allows an error to occur. Please try again. I was unable to access the account. Also, there is a delay in receiving account notifications and messages.	Fahad33 Alfahad33	##########			26	ar	us		1	ar	bad bank application compare bank find difficult access account require device authentication authentication allow error occur please try unable access account also delay receive account notifications message	Negative	1	1	1
Google Play Store	c64c1ebb-c54b-4673-8f41-cf60280facdc	The application is not working, there is no connection from the bank to add a device.	mohamed magnon	##########			2	ar	us		5	ar	application work connection bank add device	Negative	0	1	0
Google Play Store	c8fc6ab7-4ff5-4922-a273-d40ee02ad472	It's beautiful and easy.	محمد شمبل	##########			0	ar	us		5	ar	beautiful easy	Positive	0	0	0
Google Play Store	9d489efc-b69f-41a1-8b6c-c738d6234ab2	After the latest update, I cannot log in from my mobile device. After logging in, a message appears saying that your mobile is not registered. Do you want to add it? I selected yes, and then I received a call from Alinma Bank asking me to press a certain number to finish the call. I try to log in again, and the process repeats. I try again, and the same thing happens. And I am recording this note…	Nzham Ooqoo	##########			100	ar	us		1	ar	late update log mobile device log message appear say mobile register want add select yes receive call alinma bank ask press certain number finish call try log process repeat try thing happen record note say alinma bank still call	Negative	0	1	0
Google Play Store	1606f187-00fa-4ada-833f-fec79d203e0e	I cannot access the application.	Dawood salman	##########			0	ar	us		1	ar	access application	Negative	0	1	0
Google Play Store	0e9d8976-ef59-4e14-a8d5-33074eedfc2c	Very good experience and a high level of security.	bsas bsascoo	##########			0	ar	us		3	ar	good experience high level security	Positive	0	0	0
Google Play Store	ce3c1472-9d73-4a4a-9f94-e8a1a4c25e29	Very bad experience, every time it needs password reset... technical support did not resolve this issue.	ناصر محمد	##########			2	ar	us		1	ar	bad experience every time need password reset technical support resolve issue	Negative	1	1	0
Google Play Store	26ad0bae-2d3f-4f35-8051-179fd3905346	There are many problems with the new update. It doesn't allow logging in. When adding a new device, it connects and disconnects and then reconnects again.	‪Abdulraheem Alshaarani (‫المبكر‬‎)‬‏	##########			2	ar	us		1	ar	many problems new update doesnt allow log add new device connect disconnect reconnects	Negative	0	1	0
Google Play Store	f5c146f5-f02f-4a3f-a362-759ef5807c2b	I am facing a problem, I am unable to open the summary of the transactions report.	ياسر فيصل العشاري Yasser AL-OShari	##########			1	ar	us		5	ar	face problem unable open summary transactions report	Negative	0	1	0
Google Play Store	df60c14c-a3dd-4539-95cf-71a051b226ef	Very wonderful application	Redmi Note9	##########			0	ar	us		5	ar	wonderful application	Positive	0	0	0
Google Play Store	8798c235-42c8-4e33-9acf-66202c091f95	I have a problem since the last update. Every time I try to enter the application, it gives me an error message saying "Sorry, the operation did not complete. Please try again later." The problem is still ongoing.	عبدالوهاب الحبابي	##########			3	ar	us		5	ar	problem since last update every time try enter application give error message say sorry operation complete please try late problem still ongoing	Negative	0	1	0
Google Play Store	34e94316-4efe-42dc-b484-de4409881f2c	Please inform us when I enter the application, the login process becomes faulty and it says that the device is not connected to the application. For your information, I have been using the application for more than 3 years. Thank you.	Ahmed ali Abdu	##########			7	ar	us		5	ar	please inform us enter application login process become faulty say device connect application information use application years thank	Negative	1	1	0
Google Play Store	f0f98b65-0e40-46c7-9564-bf2e57717fdc	Please fix the app. It used to be a great app.	مبارك الخامري	##########			1	ar	us		5	ar	please fix app use great app	Negative	0	0	0
Google Play Store	01cfe2c8-cba0-4784-95ea-d4117274ddd1	The new update is really bad.	هند المطيري	##########			1	ar	us		1	ar	new update really bad	Negative	1	0	0
Google Play Store	e777e6fa-8854-46f7-94e7-70e21d9f20c6	Very wonderful, beautiful, and comfortable.	تركي المسعودي	##########			0	ar	us		5	ar	wonderful beautiful comfortable	Positive	0	0	0
Google Play Store	9c878953-d01c-43d5-bd29-53e318e91928	Incredibly wonderful and beautiful, progressing from one achievement to another, God willing.	ابو ادم	##########			2	ar	us		5	ar	incredibly wonderful beautiful progress one achievement another god will	Positive	0	0	0
Google Play Store	40bba8a7-02af-4006-bebd-aa398937311d	After the latest update and device verification, it does not open and cannot establish a connection for verification.	ام بدر	##########			5	ar	us		1	ar	late update device verification open establish connection verification	Negative	0	1	0
Google Play Store	84d45a53-a901-4200-996b-add7230dffea	Excellent	فنون وجنون	##########			0	ar	us		5	ar	excellent	Positive	0	0	0
Google Play Store	5d63bf63-2105-4116-a69d-9d0a11e4833e	Unfortunately, it is the worst update that does not support VPN (Virtual Private Network) and it has gone from bad to worse.	say roos	##########			0	ar	us		1	ar	unfortunately bad update support vpn virtual private network go bad bad	Negative	1	0	0
Google Play Store	8d85c495-ae34-4ef5-9dc1-a2c448216dcd	The application does not open, it displays a message stating device authentication, and it connects twice before closing the connection. The problem still exists, and the application is up to date.	ناصر عبدالله	##########			4	ar	us		3	ar	application open display message state device authentication connect twice close connection problem still exist application date	Negative	0	1	0
Google Play Store	798577db-8bf4-48ff-8444-b0b1df9ed90b	Whenever I tried to make a transfer outside the bank, I would receive a message saying "Dear Partner, please try again later."	zakri sultan	##########			0	ar	us		1	ar	whenever try make transfer outside bank would receive message say dear partner please try late	Neutral	0	1	0
Google Play Store	f6ae7564-9f0b-433a-9ebf-ef0419ccd013	How can I convert points into a monetary amount?	عاشق الغربه	##########			0	ar	us		5	ar	convert point monetary amount	Neutral	0	1	0
Google Play Store	8bfcf951-9c2a-4840-85ee-905ead09185d	Very good.	ابراهيم المنقذي	##########			0	ar	us		5	ar	good	Positive	0	0	0
Google Play Store	a184dd33-5752-4b1e-9ae2-eee191ac8db0	Very good.	mareg saad	##########			0	ar	us		4	ar	good	Positive	0	0	0
Google Play Store	4b40f47f-a7db-45ca-9476-ee94412e525a	"I tried to open an account, but it says that the mobile number is not under my name, even though the mobile is registered under my name."	ali alali	##########			1	ar	us		1	ar	try open account say mobile number name even though mobile register name	Negative	0	1	0
Google Play Store	b1f185fa-9099-46f9-88d5-f3d18bf109ca	I can't access my account 😭😭	norah nono	##########			0	ar	us		5	ar	cant access account	Negative	0	1	0
Google Play Store	3b12d46d-f980-47a7-bdd6-cea96a10551c	Alinma Bank is excellent. Thank you so much, as big as the universe. The best bank for transfers to Yemen.	Abdulh.Yahai Ali2	##########			0	ar	us		5	ar	alinma bank excellent thank much big universe best bank transfer yemen	Positive	0	0	0
Google Play Store	561ec111-a145-47ee-9ff7-236c7e801875	Completely satisfied	يسرا التوم	##########			0	ar	us		5	ar	completely satisfy	Positive	0	0	0
Google Play Store	bc816bee-8598-4c5b-9ca2-968ef091215a	Worst service and worst bank ever. It's been 3 days and I can't transfer money internally or externally, and I can't manage my account. I have filed a complaint and went to the branch, but the employee told me that the system is unavailable and it's a complete mess.	Ahmed Mohamed	##########			0	ar	us		5	ar	bad service bad bank ever days cant transfer money internally externally cant manage account file complaint go branch employee tell system unavailable complete mess	Negative	1	1	0
Google Play Store	4d151bca-9440-44a0-8b7f-e9834614072a	A very excellent application.	عبدالقادر النظاري	##########			0	ar	us		4	ar	excellent application	Positive	0	0	0
Google Play Store	8107087d-7642-443f-9b7f-6c1de454b922	Very excellent	عبد الحافظ محمد ناجي	##########			0	ar	us		5	ar	excellent	Positive	0	0	0
Google Play Store	66b2b864-e6fc-4e6c-90b3-77c4d2e891cd	The Alinma application is among the best banking applications. Its performance deserves 5 stars.	Google Account	##########			0	ar	us		5	ar	alinma application among best bank applications performance deserve star	Positive	0	0	0
Google Play Store	7dc67d21-37ea-475b-a959-5855e8ff17d6	Good	Abo Qis	##########			0	ar	us		5	ar	good	Positive	0	0	0
Google Play Store	b59f7e21-1d3a-4659-a0e7-6f28f10cbda9	The application freezes at times that are considered impractical...	فيصل H	##########			2	ar	us		2	ar	application freeze time consider impractical	Negative	1	0	1
Google Play Store	1f6d4705-e832-49f5-945d-5d6bf6ede55b	By God, it is the worst service I have ever seen at Alinma Bank. I have called more than seven times trying to solve a problem with a message that keeps appearing, saying "the user is waiting for activation on the channel." No one has helped me, dealing with you is very difficult and tedious.	أمہيہر ألظہلأأمہ	##########			5	ar	us		1	ar	god bad service ever see alinma bank call seven time try solve problem message keep appear say user wait activation channel one help deal difficult tedious	Negative	1	0	0
Google Play Store	6a464714-b028-4034-a3b9-8c6321ac3013	Excellent.	rajjimoti a	##########			0	ar	us		5	ar	excellent	Positive	0	0	0
Google Play Store	6900e9c0-6d21-480a-9c9e-23423b2f8ff1	I have not received the activation code SMS to open my account in the application for almost a week.	Ebtehal	##########			0	ar	us		2	ar	receive activation code sms open account application almost week	Negative	0	1	0
Google Play Store	a70d28db-c673-4188-ba87-0dda81fcd931	Pray upon Muhammad and the family of Muhammad.	مضلات_سواتر اشرقيه ترميم_مباني الدمام	##########			0	ar	us		5	ar	pray upon muhammad family muhammad	Neutral	0	0	0
Google Play Store	eed0e58b-1d01-4ac6-8b61-a02b1ca793ea	I am trying to open an account, but every time I reach the access page, it takes me back to the beginning.	Ahmed Hemida	##########			0	ar	us		1	ar	try open account every time reach access page take back begin	Negative	0	1	0
Google Play Store	20b8e2b0-051e-4989-b5d0-577a74ad4b72	The best bank and the most beautiful program.	عمار دلهوس	##########			0	ar	us		5	ar	best bank beautiful program	Positive	0	0	0
Google Play Store	7a76881e-fa43-4652-ab5b-4f27204bd257	Very excellent	الشريف عبدالله منصور	##########			0	ar	us		5	ar	excellent	Positive	0	0	0
Google Play Store	bf731d79-b074-45f4-9109-cc11be631353	My Android device has been not working for two weeks.	Gbreel A ahmid	##########			1	ar	us		1	ar	android device work two weeks	Negative	0	1	0
Google Play Store	4a25a6ea-ef24-4d87-90da-772deed90b2a	The app was excellent, but for the past 3 days, I've been trying to open it but it won't open. It says "The process was not completed." I hope the problem is resolved quickly.	اريج الفيفي	##########			6	ar	us		4	ar	app excellent past days ive try open wont open say process complete hope problem resolve quickly	Negative	1	1	0
Google Play Store	816c15ab-5c32-4dcd-8fb6-8a7a09a97382	"He requests to update the application every time."	زهير المالكي	##########			1	ar	us		1	ar	request update application every time	Neutral	0	1	0
Google Play Store	45a8fa7c-0d06-44fd-b64f-c9648b73fd13	Is transferring from PayPal to a bank account safe and legal, or is there a suspicion? Please advise.	abdelhadi Helal	##########			0	ar	us		5	ar	transfer paypal bank account safe legal suspicion please advise	Neutral	1	1	0
Google Play Store	6d920895-d157-41f8-88c8-f4608ba64cba	Under experiment	جابر شراحيلي	##########			0	ar	us		1	ar	experiment	Neutral	0	1	0
Google Play Store	e648bea3-6313-4136-bfda-f489afd0b9ab	Your application is slow, lagging, and frustrating. Fix it or I won't see any solution.	m k	##########			1	ar	us		1	ar	application slow lag frustrate fix wont see solution	Negative	1	0	1
Google Play Store	49ff320b-707e-430a-ae44-907d8d6e44cb	nice.	عماد هاشم	##########			0	ar	us		5	ar	nice	Positive	0	0	0
Google Play Store	ecec43d4-4ab4-426f-9c08-b9bc1c5aa020	Everything in it is excellent, its only drawback is that there are periods during the day when the application does not work at all. May Allah grant success to everyone.	sameer bakri	##########			2	ar	us		5	ar	everything excellent drawback periods day application work may allah grant success everyone	Positive	1	0	0
Google Play Store	aaf23e5c-bdbd-4258-8717-93583153b9f3	Whatever enters the account, it tells me that the application is updated and the application is updated.	Imort ٠	##########			0	ar	us		1	ar	whatever enter account tell application update application update	Neutral	0	1	0
Google Play Store	652f6d3e-9d1b-4df8-b53d-9cd323df3d74	The update has not arrived.	hamoud alshamrani	##########			0	ar	us		1	ar	update arrive	Negative	0	1	0
Google Play Store	f74c2775-404d-46e7-8f99-6853d86ddb4a	Excellent	حمود الرويس	##########			0	ar	us		5	ar	excellent	Positive	0	0	0
Google Play Store	79432011-8114-4c97-ba47-1410c3d33c80	It does not work.	جميل سعد	##########			0	ar	us		1	ar	work	Negative	0	1	0
Google Play Store	a321ad10-e5f5-464f-a28c-8b279be8b67c	Excellent	احمد الحير	##########			0	ar	us		5	ar	excellent	Positive	0	0	0
Google Play Store	8954fa8c-c38f-4128-8d7b-f2ee0f140828	I liked it.	محمد عيسى هزازي	##########			0	ar	us		5	ar	like	Positive	0	0	0
Google Play Store	01bdbf83-b81d-41a2-b854-f58984a0774f	Excellent, very very very very excellent.	حسين كريري	##########			0	ar	us		5	ar	excellent excellent	Positive	0	0	0
Google Play Store	cd4694bf-79e3-4676-b36d-03052260a3c5	Improve for the better.	MrKssaarb	##########			0	ar	us		3	ar	improve good	Positive	0	0	0
Google Play Store	9befe8ba-042a-463e-8c78-9a5fbd3369e0	excellent	حنين حمد	##########			0	ar	us		5	ar	excellent	Positive	0	0	0
Google Play Store	dc55a0e9-2475-4a0f-8910-2e4278ba2d9a	I am currently experimenting... According to the praise they give you, I gave you 5 stars.	عمار العيسائي	##########			0	ar	us		5	ar	currently experiment accord praise give give star	Positive	1	0	0
Google Play Store	3d7b375d-8e56-4884-a5f0-22a92deb54ae	Bad	faisal sh89	##########			0	ar	us		1	ar	bad	Neutral	1	0	0
Google Play Store	e381b1ba-1e04-4057-bf73-a069d79509c3	The best bank, their employees are respectful and serve you fully, and the INMA app is excellent. Thank you from the bottom of my heart ❤	Mussab Karar	##########			0	ar	us		5	ar	best bank employees respectful serve fully inma app excellent thank bottom heart	Positive	0	0	0
Google Play Store	ab0ad29f-0c56-4569-a35c-5256549e2fca	Very beautiful, by God.	محمداحمدمحمد عبدالرحيم	##########			0	ar	us		5	ar	beautiful god	Positive	0	0	0
Google Play Store	4c45caa4-d72a-4a9a-89b7-47576541c4be	adaD	lfia LANzI	##########			0	ar	us		5	ar	adad	Neutral	1	0	0
Google Play Store	7d4224c9-cd57-4ffa-b6e2-4407847bef40	I am asked to update, but I don't see an update icon on Google Play.	ALABDLI HUSSIN	##########			1	ar	us		5	ar	ask update dont see update icon google play	Neutral	0	1	0
Google Play Store	63bef37f-725e-410b-9ac4-6dccb3c67195	Thank you.	خسوييو تذتذت	##########			0	ar	us		5	ar	thank	Positive	0	0	0
Google Play Store	663d7090-8ba0-4fcb-97f7-a7767616ccc8	the worstlication that hangs and never opens.	احمد احمد	##########			0	ar	us		1	ar	worstlication hang never open	Negative	1	1	1
Google Play Store	e85ce1bc-6e40-454d-9e2b-292b4217d3e6	Very good.	أحمد المالكي	##########			0	ar	us		4	ar	good	Positive	0	0	0
Google Play Store	8f654860-8e13-4708-8829-f5a869d564f0	In truth, more than wonderful.	mhmd30394 mhmd30394	##########			0	ar	us		5	ar	truth wonderful	Positive	0	0	0
Google Play Store	6caf987c-5e7d-4c40-a0bb-51336c439691	Excellent once	حمدي لؤي	##########			0	ar	us		5	ar	excellent	Positive	0	0	0
Google Play Store	873bde96-e174-4ef7-be8f-605fbaca6f6e	Nice	عازف الاحزااان	##########			0	ar	us		5	ar	nice	Positive	0	0	0
Google Play Store	fab16da2-6d0d-493d-9714-a6e6f43144a8	Excellent very much.	Basem Alhatemi	##########			0	ar	us		5	ar	excellent much	Positive	0	0	0
Google Play Store	e4f6c85a-666e-4845-a0df-0171c3094dc9	Nice	عبدالله التميمي	##########			0	ar	us		5	ar	nice	Positive	0	0	0
Google Play Store	555ff752-47c1-458c-a7a1-1c7659c020cb	Your pilgrimage	Dhafer Alshehri	##########			0	ar	us		2	ar	pilgrimage	Neutral	0	0	0
Google Play Store	4904af38-f462-48d1-b5ca-7f797e7e3986	The download is already complete... Unfortunately, there is an error that occurs during most of the operations (Dear customer, please try again later.) * Please add fingerprint login*	bandr almutairi	##########			0	ar	us		4	ar	download already complete unfortunately error occur operations dear customer please try late please add fingerprint login	Negative	0	1	0
Google Play Store	8e3da55d-30d4-498a-9085-8fbca32d9d8b	"Excellent application and very great service from the application in dealing smoothly. Thank you, Alinma Bank, and for the better, InshaAllah."	bashar ALOBAID	##########			1	ar	us		5	ar	excellent application great service application deal smoothly thank alinma bank good inshaallah	Positive	0	0	0
Google Play Store	8cd8167b-1f39-484b-af35-f68cc8ba09a4	Special services	aahm alwaily	##########			0	ar	us		4	ar	special service	Neutral	0	1	0
Google Play Store	e7fa07c9-50f2-4178-8d2d-b8fafee6f9a4	Easy.	ابو محمد	##########			0	ar	us		5	ar	easy	Neutral	0	0	0
Google Play Store	925f7c71-5725-4c15-b1cd-f0fc48bdfcb8	After the update, it is not opening.	hasan 056	##########			0	ar	us		1	ar	update open	Negative	0	1	0
Google Play Store	f75cf8a8-9c1a-4651-8db3-9d3f67e5bf0c	Good, I want the best.	NAJE ALHABABI	##########			0	ar	us		5	ar	good want best	Positive	0	0	0
Google Play Store	85d2ff60-38f2-40bc-bdf2-2bf8e58f686f	Good	Fares Abdalrahim Ahmed Algbari	##########			0	ar	us		5	ar	good	Positive	0	0	0
Google Play Store	41bab63a-2e75-420a-ba90-2d348a0cc9b3	Very good.	Mohamed Elshamy	##########			0	ar	us		5	ar	good	Positive	0	0	0
Google Play Store	ee19bbea-ffc8-424f-9e73-0486a3a522a3	Lazy in loading	mohamed naser	##########			0	ar	us		2	ar	lazy load	Negative	1	1	1
Google Play Store	255bf5bd-d5af-4e82-83fc-e2e7c46a3073	The worst bank application and the worst electronic service I have ever encountered, it involves a significant amount of wasted time and effort, and transaction worst 🤦🏻‍♂️ First of all, the electronic service on the computer logs you out every three minutes or so, displaying a pop-up window alerting you for 20 seconds that it is logging you out. And after getting frustrated with the service and …	سلطآن M.T	##########			8	ar	us		1	ar	bad bank application bad electronic service ever encounter involve significant amount waste time effort transaction bad first electronic service computer log every three minutes display popup window alert second log get frustrate service shut computer go use atm reject service without provide explanation open application transfer money another bank refuse log claim log another device well device …	Negative	1	0	0
Google Play Store	58c7febd-35ed-4b06-b4d3-9954aa4f8bad	The application no longer delays when entering the page like before, but it hangs for no reason. Additionally, it is very difficult to print the card, unlike other banks that enable and configure even the smallest details. If you want to retain customers, my greetings to you.	عبدالرحمن الفضلي	##########			0	ar	us		3	ar	application long delay enter page like hang reason additionally difficult print card unlike bank enable configure even small detail want retain customers greetings	Neutral	1	0	1
Google Play Store	4bf27240-5586-4530-ac2a-2a7b3651446b	Recently, there has been slowness and freezing.	semo barrak	##########			0	ar	us		3	ar	recently slowness freeze	Negative	0	0	1
Google Play Store	6729e5a4-18f4-4922-bdc0-4111350bcb94	Wonderful	ماجد الحوري	##########			0	ar	us		5	ar	wonderful	Positive	0	0	0
Google Play Store	6a6b9141-a8cb-4798-a9dd-e20067f8635e	We thank you for your kind cooperation.	عبدالله العمراني	##########			0	ar	us		5	ar	thank kind cooperation	Positive	0	0	0
Google Play Store	ac79d7f8-44be-4ad3-8e45-a8674a8cd034	I thank him.	Hh Hh	##########			0	ar	us		5	ar	thank	Positive	0	0	0
Google Play Store	d0ba30a1-f21b-4b8e-b862-7be6d23afa18	Excellent	Mrmr Almrmr	##########			0	ar	us		5	ar	excellent	Positive	0	0	0
Google Play Store	e5a16650-a8cf-4157-bc3f-aea6132a94b2	The application is very buggy and laggy, and it's unprofessional and unreliable as a banking application!!	Abdullah AL-Ghamdi	##########			2	ar	us		1	ar	application buggy laggy unprofessional unreliable bank application	Negative	0	1	1
Google Play Store	b04d2c51-edc6-4dd6-805c-7ccf0b327af9	Excellent, may God bless you.	معتصم ادريس	##########			0	ar	us		5	ar	excellent may god bless	Positive	1	0	0
Google Play Store	28943567-b119-4d65-8349-92ede2bb5afd	It is very bad. Every time I try to open it, it tells me that my password is incorrect.	Sana alamri	##########			1	ar	us		1	ar	bad every time try open tell password incorrect	Negative	1	1	0
Google Play Store	7866bd1c-2bac-48d1-9ec1-e5929432ba95	Sometimes the application crashes.	بندرBndr محمد سالمMohmd salem	##########			0	ar	us		5	ar	sometimes application crash	Negative	0	1	0
Google Play Store	cbf16c71-bc2d-4e35-97cc-7897d2c0aa5c	Tired in the program.	ريان فيصل	##########			2	ar	us		1	ar	tire program	Negative	1	0	0
Google Play Store	eca830c8-bf0b-483a-9632-9b01e6226e1f	The best Saudi bank in terms of services.	فتى الديرة العتيبي	##########			0	ar	us		5	ar	best saudi bank term service	Positive	0	0	0
Google Play Store	8296e24b-b55a-4aae-ac34-acf0374d7be0	He is unable to speak.	AREF ALi	##########			0	ar	us		3	ar	unable speak	Negative	0	1	0
Google Play Store	03c7d76c-23e1-413a-adc9-353239a84d02	the worstlication and failed support. Insha'Allah, I will change this bank.	فيصل	##########			1	ar	us		1	ar	worstlication fail support inshaallah change bank	Negative	1	1	0
Google Play Store	15389943-d716-4bbb-9edd-65fedd2b5d5d	I am completely satisfied with all of your services and grateful.	ايهاب محمد	##########			0	ar	us		5	ar	completely satisfy service grateful	Positive	1	0	0
Google Play Store	6c7bd67b-3422-472f-b45c-a9f3d99f3a43	Very	Muhammad Ali	##########			0	ar	us		5	ar		Neutral	0	0	0
Google Play Store	41d7825a-b15a-4aa7-8d1d-d954f03be241	Very very very very bad website	Hathal Alqahtani	##########			1	ar	us		1	ar	bad website	Negative	1	0	0
Google Play Store	5f85a9c9-553a-4c74-a43a-579e84facbd7	Very good.	muhib habib	##########			0	ar	us		5	ar	good	Positive	0	0	0
Google Play Store	43398265-a29c-4593-93fa-4323b3ed9ffb	The program has been closed for a few days.	Ali Alhasan	##########			1	ar	us		1	ar	program close days	Neutral	1	0	0
Google Play Store	e897f6a9-7adc-47a4-8a9e-3bafe8c92166	Excellent, but it needs to catch up with its competitors.	Kh Shalan	##########			0	ar	us		5	ar	excellent need catch competitors	Positive	1	0	0
Google Play Store	158f1d8e-cd8e-48d7-ad02-3d3641b55b56	The application is good, but it would be great if the transaction number could also be sent to the mobile number registered with our bank. This way, the transaction would be international through Alinma Express.	امين محمد	##########			0	ar	us		5	ar	application good would great transaction number could also send mobile number register bank way transaction would international alinma express	Positive	1	1	0
Google Play Store	cea69ad4-5e57-4d64-bdab-f5cb42f7224f	The visa is supposed to be taken after a month, why do they charge 5 riyals or 10 riyals for a transaction? This doesn't make sense. We need petrol, we need supplies, we need something that should be covered with the salary. It's really frustrating and it's supposed to be withdrawn from all banks and ATMs, why not with a card like any other card? Withdrawals, inquiries, anything should be availab…	سالم آل زمانان	##########			1	ar	us		2	ar	visa suppose take month charge riyals riyals transaction doesnt make sense need petrol need supply need something cover salary really frustrate suppose withdraw bank atms card like card withdrawals inquiries anything available unacceptable ill change bank	Negative	1	0	1
Google Play Store	5e914870-67a5-46b2-975d-da5fc12efaac	Why is the application freezing?	tawfiq alsaalimi	##########			0	ar	us		5	ar	application freeze	Negative	1	0	1
Google Play Store	9a2efbeb-699b-4a2f-9fc8-f15fb7555361	Very excellent	حمدي فوزي	##########			0	ar	us		5	ar	excellent	Positive	0	0	0
Google Play Store	41188431-cdf0-402c-8595-a4098808d054	The best bank in the kingdom.	اشرف محمد س	##########			0	ar	us		5	ar	best bank kingdom	Positive	0	0	0
Google Play Store	85a5a151-c0a1-4a99-8bb2-a661132bec62	Excellent	beautiful flower	##########			0	ar	us		5	ar	excellent	Positive	0	0	0
Google Play Store	70772697-7f1d-4b82-be56-e035606f4842	Increase in the number of wishes/cards.	راجح العتيبي	##########			0	ar	us		2	ar	increase number wishescards	Neutral	0	0	0
Google Play Store	9a72272e-d392-45a4-8520-95179dbe0daf	Excellent and forward with success.	FAHAD 1	##########			0	ar	us		5	ar	excellent forward success	Positive	0	0	0
Google Play Store	74444a6c-4742-4eca-8872-204efefc9151	Good.	نادر اليافعي	##########			0	ar	us		5	ar	good	Positive	0	0	0
Google Play Store	d491c6ba-41dd-471e-bdbd-be28a2addf01	It is bad, and my account will be deleted. I wanted to update my bank account but I couldn't because there is no nearby branch in the governorate where I live, and there is no way to update the account except through branches, unlike other banks!	ابو سلطان	##########			1	ar	us		1	ar	bad account delete want update bank account couldnt nearby branch governorate live way update account except branch unlike bank	Negative	1	1	0
Google Play Store	c05d00c2-7636-4f59-bb83-e8c5b9602472	Excellent very very very much	عامر محمد	##########			0	ar	us		5	ar	excellent much	Positive	0	0	0
Google Play Store	d0f1b3da-048b-4fd2-bd19-5ccdada69797	The best bank.	فهد الحيان	##########			0	ar	us		5	ar	best bank	Positive	0	0	0
Google Play Store	bb12fad3-d24b-4300-9ede-c336e30d506e	Very wonderful.	Alhothifi Alromansiah	##########			0	ar	us		5	ar	wonderful	Positive	0	0	0
Google Play Store	1d4d6b6a-3dfa-4f15-8ca1-b8b96dbb03cc	Easy application	محمد عزيز	##########			0	ar	us		5	ar	easy application	Positive	0	0	0
Google Play Store	e1c39dc2-eca8-445b-bda9-d43402b0bbb2	Why do you lie, Mishari Al-Qahtani?	الونادق ماتهاب البنادق	##########			0	ar	us		1	ar	lie mishari alqahtani	Negative	0	0	0
Google Play Store	915a7814-b41b-464a-b55b-ceefc8090a8d	What are the offers these days on car installments?	fhad jabeer	##########			0	ar	us		5	ar	offer days car installments	Neutral	0	0	0
Google Play Store	372f467a-286e-4819-af0a-b968bcfaae50	"Alinma Bank... One of the humble unknown soldiers 🌹"	Eyas Abazeed	##########			0	ar	us		5	ar	alinma bank one humble unknown soldier	Positive	1	0	0
Google Play Store	89a530db-38b4-4802-bb23-24b6f63e95d2	What is the problem that the application keeps closing on me and I can't open it?	مهندابوسهيل اليافعي	##########			0	ar	us		5	ar	problem application keep close cant open	Negative	0	1	0
Google Play Store	f4f6b571-9b91-40bc-a454-e80c71cfac70	Excellent, very good.	ناصر قاسم	##########			0	ar	us		1	ar	excellent good	Positive	0	0	0
Google Play Store	d96bf68e-13f2-407d-8cba-b75f363d675d	I don't know how to open an account on the application. They told me to go to the "update data" page.	Mohamed Aref	##########			0	ar	us		1	ar	dont know open account application tell go update data page	Negative	0	1	0
Google Play Store	ca326741-37c7-4fb9-8096-b70f9a85249f	May God raise your blood pressure... but not your profits. Every day your website crashes and your application is as unhelpful as your faces.	hisham ghalib	##########			1	ar	us		1	ar	may god raise blood pressure profit every day website crash application unhelpful face	Negative	1	1	0
Google Play Store	69eec9a4-1e1c-4035-8ea3-f5f53cc94b7f	He is fine, but when you come to open (it), the request has not been completed.	Awad omer	##########			0	ar	us		5	ar	fine come open request complete	Neutral	0	1	0
Google Play Store	7d56c43d-e647-407b-86f0-440fc4da49cf	Wonderful bank and excellent staff service.	هيله العبدالله	##########			0	ar	us		5	ar	wonderful bank excellent staff service	Positive	0	0	0
Google Play Store	f941dcf3-33ea-4ed9-96cd-7b7c015f8b8a	Every time I try to log in, it kicks me out. I haven't benefited from it for 7 months and the problem still hasn't been resolved. Now all the banks are electronic and their applications are fast, but this app is still freezing and kicking me out.	wj jx	##########			1	ar	us		1	ar	every time try log kick havent benefit months problem still hasnt resolve bank electronic applications fast app still freeze kick	Negative	0	1	1
Google Play Store	a322005e-7eba-4650-9b81-33459ac07b2b	There is a problem when entering the application, an error message appears and the application needs to be updated, and when searching for the updated version, it does not exist.	ABDALLA ZAYED	##########			3	ar	us		1	ar	problem enter application error message appear application need update search update version exist	Negative	0	1	0
Google Play Store	9dcac202-656d-4bac-a09f-8b883820aca2	Beautiful and more development.	SALEH MOHSEN	##########			0	ar	us		5	ar	beautiful development	Positive	0	0	0
Google Play Store	fb7648c0-a31b-4770-9f72-2efd5339718e	The Enmaa application is easy and convenient.	Rtt 54	##########			0	ar	us		5	ar	enmaa application easy convenient	Positive	0	0	0
Google Play Store	a0696756-5fb4-41bc-acbe-1fd2cdeb108d	Summit	محمد محمد	##########			0	ar	us		5	ar	summit	Neutral	0	1	0
Google Play Store	ccfed0db-24f7-4dac-8feb-5f9f80b93640	Five stars for the King Faisal branch, which is on King Abdullah Street. It is characterized by elegance and sophistication in customer service. Something that is truly honorable.	Mohamed Moaned	##########			0	ar	us		5	ar	five star king faisal branch king abdullah street characterize elegance sophistication customer service something truly honorable	Positive	0	0	0
Google Play Store	67c69267-ed13-4876-a52f-cf141db5dff0	Unfortunately, it keeps freezing every now and then, even if it updates frequently.	Majid Almajid	##########			1	ar	us		1	ar	unfortunately keep freeze every even update frequently	Negative	0	0	1
Google Play Store	203d196c-4f8e-4c26-95b8-f25224aa7601	Excellent, but please add fast transfers with Alinma Bank and why other banks are not available. Also, add Visa card for all ATMs, such as Mada. Why did they withdraw 750 or 800 instead of 500? Where are we living? They give 500 at the end of the month and then deduct it twice. At least give us 1000, enough is enough. May God be sufficient for us. Where can we complain? We are tired of you and th…	سالم اليامي	##########			0	ar	us		3	ar	excellent please add fast transfer alinma bank bank available also add visa card atms mada withdraw instead live give end month deduct twice least give us enough enough may god sufficient us complain tire high price	Neutral	1	1	0
Google Play Store	a17366a3-ef44-4ba5-b7be-215134c262c2	The best dealing is easy dealing with exceptional services. We aspire to give more.	صقور وراف	##########			0	ar	us		5	ar	best deal easy deal exceptional service aspire give	Positive	0	0	0
Google Play Store	4844a23a-e8a8-448c-967a-5386f0cae7e7	Very good, excellent	معاد أ بويحي	##########			0	ar	us		5	ar	good excellent	Positive	0	0	0
Google Play Store	d803bd03-a2ef-40b4-a643-7d301efb955a	Excellent	محمد المنتصر	##########			0	ar	us		5	ar	excellent	Positive	0	0	0
Google Play Store	0dc3d59d-67b5-45ed-8e60-113d6fdebc0b	Best treatment	شهاب الروم	##########			0	ar	us		5	ar	best treatment	Positive	0	0	0
Google Play Store	a37e202a-9ff5-410b-9405-c0d0225d5940	The best bank and the best easy services application with a professional customer service experience.	صور من مديرية برع	##########			0	ar	us		5	ar	best bank best easy service application professional customer service experience	Positive	0	0	0
Google Play Store	009f81c2-923b-4e84-9b54-1fcf4fb35f2e	The worst bank from my experience.	عمر حمود	##########			1	ar	us		1	ar	bad bank experience	Negative	1	0	0
Google Play Store	e15f1262-7c5a-437e-bb7c-b19654cfafaa	It didn't benefit me.	ماهر الماهر	##########			1	ar	us		1	ar	didnt benefit	Negative	0	1	0
Google Play Store	2c4d3ba0-5062-440e-87b0-5c47a2b559a8	nice	Alaraby Sayed	##########			0	ar	us		5	ar	nice	Positive	0	0	0
Google Play Store	e5722311-be39-4c32-8d5d-fb5a78b5cf0e	Thank you, Banque Alinma.	ياسين يوسف العبد	##########			0	ar	us		5	ar	thank banque alinma	Positive	0	0	0
Google Play Store	20a277c4-b1d9-4eaa-8103-1274a226f16c	Excellent	ابو عبدالله بن ميق	##########			0	ar	us		5	ar	excellent	Positive	0	0	0
Google Play Store	a50aff8f-fe3e-4970-9b69-a7cd0860b66d	Please add a section to update the national identity.	Ee Xx	##########			1	ar	us		1	ar	please add section update national identity	Neutral	0	1	0
Google Play Store	16e4d0d7-982c-4072-8c80-d09844edce0e	Beautiful	عبد الملك فتحي	##########			0	ar	us		5	ar	beautiful	Positive	0	0	0
Google Play Store	67c4164b-3163-4e85-b55e-01a2e0dea776	Excellent services	Mohammed Alezzi	##########			0	ar	us		5	ar	excellent service	Positive	0	0	0
Google Play Store	665e04e5-5105-4a9c-b91d-abda1f5abbe5	"Excellent services, very nice, thank you, Alinma Bank."	عبدقاسم سيف الزهيري	##########			0	ar	us		5	ar	excellent service nice thank alinma bank	Positive	0	0	0
Google Play Store	f1ada1e9-acb6-45ff-a7d5-4921d5e41ca7	Amazing program 💖 You can become famous quickly because of the short videos. It's really enjoyable. Anyone can easily become famous on this app. It's amazing and comprehensive. It caters to all different cultures and tastes. You can make new friendships with online friends. Truly wonderful, excellent, and beautiful ❤️ Just one problem, which is some bad videos. Or bullying, exposing and sharing i…	مشاري القحطاني	##########			23	ar	us		5	ar	amaze program become famous quickly short videos really enjoyable anyone easily become famous app amaze comprehensive cater different culture taste make new friendships online friends truly wonderful excellent beautiful one problem bad videos bully expose share inappropriate photos bully mistreat celebrities people	Positive	1	0	0
Google Play Store	9904ff10-c57d-492d-9f0a-fac043663325	"What opens"	عبدالسلام عبدالله	##########			1	ar	us		1	ar	open	Neutral	0	1	0
Google Play Store	48af7f0a-70ea-40ec-aa91-3848da7efcce	Alinma is the best bank.	جمال البخيتي	##########			0	ar	us		5	ar	alinma best bank	Positive	0	0	0
Google Play Store	54d7f9fe-a4c2-4edf-9ee5-b8cc73ab4183	1. The transaction for card *0535 was declined due to the timing of the transaction overlapping with your login time on one of the bank's electronic channels. Please log out and try again later. 👎👎👎👎👎 What an annoying message. You ruined our day. 2. When paying a saved bill, my bank account number appears on the receipt, although it shouldn't be displayed, similar to transfer receipts and others.	Abdulraheem Alshebami	##########			68	ar	us		2	ar	transaction card decline due time transaction overlap login time one bank electronic channel please log try late annoy message ruin day pay save bill bank account number appear receipt although shouldnt display similar transfer receipt others	Negative	1	1	0
Google Play Store	6fb79645-0189-46aa-9ed5-dcde49e7865a	Salman bin Abdulaziz	Hassan Al-zoapidi	##########			0	ar	us		5	ar	salman bin abdulaziz	Neutral	0	0	0
Google Play Store	9826cea7-1076-474f-860e-0c5688c81c62	Unemployment experience and the application is more than stupid, it doesn't perform any financial transactions, and by God, it is not a high-tech bank.	Alaa Eldain	##########			1	ar	us		1	ar	unemployment experience application stupid doesnt perform financial transactions god hightech bank	Negative	1	1	0
Google Play Store	2344ffb0-eb81-4833-99a5-a08144923782	Wonderful, honestly.	أبو صالح	##########			0	ar	us		5	ar	wonderful honestly	Positive	0	0	0
Google Play Store	956a3731-a546-47a7-b824-474ffdbb0abe	Beautiful	حسن الرويلي	##########			0	ar	us		5	ar	beautiful	Positive	0	0	0
Google Play Store	36a3565a-03c2-47c7-9f16-7dce095a1324	Very excellent	علي خبراني	##########			0	ar	us		5	ar	excellent	Positive	0	0	0
Google Play Store	13737f80-2ed7-4d87-8109-3da8a4a6f99a	Why am I trying to enter the application, it refuses my entry and tells me to update, even though it has already been updated!!	Khalid 888	##########			4	ar	us		1	ar	try enter application refuse entry tell update even though already update	Negative	0	1	0
Google Play Store	3a87bc31-ca87-4e0e-847f-e46307673b63	The best and brotherly service that I have ever seen, without any exaggeration, in any other place.	حسان حبلص Hassaan hablas	##########			0	ar	us		5	ar	best brotherly service ever see without exaggeration place	Positive	0	0	0
Google Play Store	2e1f2f2a-682b-4778-9191-f002555c6566	Dear customer, in the issue about international transfer, it appears that there is a problem. You should try again later because you need to transfer quickly due to an urgent matter. The system tells you to try later, but this issue needs to be resolved unlike Alahli and Alrajhi banks, where you don't receive any notifications regarding your transfer at any time.	Raof Ali	##########			0	ar	us		3	ar	dear customer issue international transfer appear problem try late need transfer quickly due urgent matter system tell try late issue need resolve unlike alahli alrajhi bank dont receive notifications regard transfer time	Negative	0	1	0
Google Play Store	95b50423-3eaf-45d4-a712-58c0ff2bc956	Excellent very	امين الوصابي	##########			0	ar	us		5	ar	excellent	Positive	0	0	0
Google Play Store	75d95338-f5ec-42fd-829c-f5ce9910ada7	Easy and smooth transaction.	عقيل الاهدل	##########			0	ar	us		5	ar	easy smooth transaction	Positive	0	0	0
Google Play Store	b16f24ce-e054-4ec6-a3f1-91d6b4c6073f	Excellent services. Excellent efforts. Many thanks to the dear Anmaa team.	مروان الحجري	##########			1	ar	us		5	ar	excellent service excellent efforts many thank dear anmaa team	Positive	0	0	0
Google Play Store	c9211ca8-c6a9-4569-84ba-4833e97da31e	Excellence / Magnificence	ناصر السفياني	##########			0	ar	us		5	ar	excellence magnificence	Positive	0	0	0
Google Play Store	6d1ccee5-37fc-4fdc-ae7b-f4d0f194f30a	Beautiful, nice	الطيور المهاجره اليمن	##########			0	ar	us		5	ar	beautiful nice	Positive	0	0	0
Google Play Store	b1306c0b-bb11-45f7-a42c-67147193572d	Excellent.	Adam Musa	##########			0	ar	us		5	ar	excellent	Positive	0	0	0
Google Play Store	c7e23070-1e21-43e4-9873-4b08b9691219	Excellent	محمد علي حاج الحاج	##########			0	ar	us		5	ar	excellent	Positive	0	0	0
Google Play Store	a1b38ea6-a9aa-4d79-9d16-d58f7e9fa4fe	Very good.	جمال الحربي	##########			0	ar	us		5	ar	good	Positive	0	0	0
Google Play Store	3c45bd9a-da89-4b33-bc6e-7db6cc997e27	I recommend dealing with Alinma Bank.	ابراهيم جهلان	##########			0	ar	us		5	ar	recommend deal alinma bank	Neutral	1	0	0
Google Play Store	ba0f5bd6-ffce-45e8-b94a-3992b4fe1202	Excellent, very much.	مشيرمحمدثابت سعد صالح	2022-09-05 06:20:00			0	ar	us		4	ar	excellent much	Positive	0	0	0
Google Play Store	51027474-bef2-49d3-8960-5f04ba57ef32	The best bank with the finest banking services and a very sophisticated service.	Saleh Alajlan	2022-09-05 03:49:00			0	ar	us		5	ar	best bank fine bank service sophisticate service	Positive	0	0	0
Google Play Store	ed843fa7-911b-4c60-a8a7-6a672d6e3224	"An easy-to-use application is better than many other banking applications."	Ghazy99 Saeed	2022-09-05 02:56:00			0	ar	us		5	ar	easytouse application good many bank applications	Positive	0	0	0
Google Play Store	8fa490c3-0bd2-4d52-8b46-72bb2c2b4ae4	The platform needs to be developed and secured to perform excellently, as its current performance is not good. This applies to all development platforms.	Saud Alwarrad	2022-09-05 02:13:00			2	ar	us		3	ar	platform need develop secure perform excellently current performance good apply development platforms	Negative	1	0	0
Google Play Store	61eeb08d-0dfc-47aa-88d1-cf581398c2f5	Better than Al Rajhi Bank, close Al Rajhi and transfer to Alinma Bank.	فيصل الصبحي	##########			0	ar	us		5	ar	good al rajhi bank close al rajhi transfer alinma bank	Neutral	1	1	0
[truncated: 4,744 more rows]
