# Supplementary material for: Retrieval-augmented generation analysis of user reviews in Saudi mobile banking apps: a comparative user experience study of iOS and Android
Source: PeerJ journal article supplement (doi:10.7717/peerj-cs.3565), 2026-02-06
Supplement: Android.zip [file aljazirasmart_final.xlsx]

## Sheet: Sheet 1 - aljazirasmart_final
aljazirasmart_final
source	review_id	review_description	user_name	review_date	developer_response	developer_response_date	thumbs_up	language_code	country_code	app_version	rating	en	cleaned_reviews	Sentiment	Satisfaction	Effectiveness	Efficiency
Google Play Store	1e59cb87-716f-4dc8-9a2b-0a50ab216cf5	Excellent, but why did they freeze your account before your residency expired?	Ayyub Al-Doubais	##########			7	en	us		3	ar	excellent freeze account residency expire	Neutral	1	1	0
Google Play Store	2bdd17c5-d9f0-4bec-9a8d-f7d064796a7c	The latest update is bad. You cannot hide some of your accounts and not display them. And every transfer is rejected, and this message appears: "Rejected outgoing financial transfer. Reason: System error [Error code: DT04]."	Yahya Al Khzmri	##########			0	en	us		2	ar	late update bad hide account display every transfer reject message appear reject outgo financial transfer reason system error error code dt	Negative	1	1	0
Google Play Store	8995b146-dd87-4fe1-859f-9993b1a14373	I contacted them through Twitter, and their response was very quick. Thank you ❤️❤️	Moe	##########			0	en	us		5	ar	contact twitter response quick thank	Positive	0	0	0
Google Play Store	4f4a7646-2516-4a11-a7c3-5855a26d126a	There is an improvement in the application compared to the past, but it still needs development.	Nawa Aljo	##########			0	en	us		4	ar	improvement application compare past still need development	Neutral	1	0	0
Google Play Store	fc9e2787-d086-441d-bb9e-4086a0cb401b	When I updated the application, it did not open and a message appears saying "device rooted, you can't use this app". Please note that I did not root my Samsung Note 20 device.	fabanmy	##########			0	en	us		1	ar	update application open message appear say device root cant use app please note root samsung note device	Negative	0	1	0
Google Play Store	9fb94b6d-84f7-4f94-946e-191bf5f69f74	It was one of the best applications, but after the latest update, it has become one of the worst. It has become very difficult to login and the internal interface has become even harder. I hope it returns to its old state. If it's not broken, don't fix it.	Nasser Alomar	##########			0	en	us		2	ar	one best applications late update become one bad become difficult login internal interface become even hard hope return old state break dont fix	Negative	1	1	0
Google Play Store	3030b064-e82f-4b5d-9f1b-b3540b3a97c7	The application is practical, but I did not like the new update's appearance. The old update was more beautiful, and I hope to bring it back with the addition of a dark mode.	Google User	##########			0	en	us		4	ar	application practical like new update appearance old update beautiful hope bring back addition dark mode	Negative	1	0	0
Google Play Store	fe2f212d-136d-46eb-ac4e-4066ef7aa125	Every time I try to log in, it says there is an error. I don't know when they will fix it.	abdulaziz alharbi	##########			0	en	us		1	ar	every time try log say error dont know fix	Negative	0	1	0
Google Play Store	d4298ed1-bf9c-4dfd-a477-d6cd47dbef88	The application has been freezing and not opening after the latest update. The Al Jazeera application is weak and needs significant improvement.	Ahmed	##########	Dear Customer, Kindly Contact AlJazira phone on 920006666 to assist you. Thank you.	##########	0	en	us		1	ar	application freeze open late update al jazeera application weak need significant improvement	Negative	1	1	1
Google Play Store	8caacbc2-33f9-42a3-bad6-ba3ed02133fa	Nadeem	malik nadeem	##########			0	en	us		5	ar	nadeem	Neutral	0	0	0
Google Play Store	e8c16ab6-4bbe-4b76-8b0d-aeeb7d0ab788	I have been using the application for a long time now... It is easy and great, and we hope it improves even more.	Sami Oa	##########			0	en	us		5	ar	use application long time easy great hope improve even	Positive	0	0	0
Google Play Store	5435bed4-a928-4ccd-9d36-6baa2c8e80b3	Masha Allah translates to "God has willed it" or "God has blessed it." It is an expression used to show admiration, amazement, or praise for something.	Taufique Shaikh	##########			0	en	us		5	ar	masha allah translate god will god bless expression use show admiration amazement praise something	Positive	1	0	0
Google Play Store	da6cff19-edb2-4931-9140-ea4fd1ba531e	May you be rewarded the best of this world and the blessings of the Hereafter.	Sneeeak Samurai	##########			0	en	us		5	ar	may reward best world blessings hereafter	Positive	1	0	0
Google Play Store	fd3d148f-0a6c-4fdb-9415-e3d061b9d551	A beautiful, easy, and very clear application.	Abdulah Al Ahmari	##########			0	en	us		5	ar	beautiful easy clear application	Positive	0	0	0
Google Play Store	f5208a2d-a6a8-4e48-8085-5bd6e316c540	I don't know how, but my Android system has version 10 and I didn't give permission to this banking application to read my messages. However, it still reads messages automatically and performs actions like logging in and transferring money. I don't want this at all, I want to do it manually myself. The question is, how did this program manage to do that? The situation is suspicious.	Kmys	##########			0	en	us		1	ar	dont know android system version didnt give permission bank application read message however still read message automatically perform action like log transfer money dont want want manually question program manage situation suspicious	Negative	1	1	0
Google Play Store	f2173a80-b71a-4424-9c87-fce0c88fd578	He deserves the title of the dumbest application, I swear it frustrated me. I said I would write a review about its stupidity.	مالكوم أكس	##########			0	en	us		1	ar	deserve title dumb application swear frustrate say would write review stupidity	Negative	1	0	0
Google Play Store	b0b8bed7-210e-485d-bdc9-581f88d81a50	An application that relies on it.	Mutaz Abumuaath	##########			0	en	us		5	ar	application rely	Neutral	1	0	0
Google Play Store	6c267ea0-4840-4c2a-8d80-f9d123c919a4	Excellent.	Abdallh Al-Masallami	##########			0	en	us		5	ar	excellent	Positive	0	0	0
Google Play Store	b40e9dac-0443-4c17-8cdd-8ec67cd406f1	The worst bank and the worst treatment, I do not recommend it and its application is bad.	Muneer Lyati منير لياتي	##########			0	en	us		1	ar	bad bank bad treatment recommend application bad	Negative	1	0	0
Google Play Store	2cd9c53d-88a8-4dd6-8fe7-db72f223a160	Good	ahmad osama	##########			0	en	us		4	ar	good	Positive	0	0	0
Google Play Store	be9c22dd-bdb4-4edb-be85-61944eb4e920	Kuwaiti Dinar	منال سعد	##########			0	en	us		5	ar	kuwaiti dinar	Neutral	0	0	0
Google Play Store	48dee48a-3501-4337-b392-6bc613b7fb37	The latest update is not working for me, I wish I hadn't updated.	google gmail	##########			0	en	us		1	ar	late update work wish hadnt update	Negative	0	1	0
Google Play Store	e61f7116-3079-496e-b9bb-921487cf04e4	The application is more than wonderful, especially after adding the instant service.	Adnan Salah	##########			9	en	us		5	ar	application wonderful especially add instant service	Positive	0	0	0
Google Play Store	587bd64d-23a8-431b-ad19-ca814ee59903	Wonderful	Assad Bokhary KA : ibn Ishmael	##########			0	en	us		5	ar	wonderful	Positive	0	0	0
Google Play Store	83eda4ad-76b1-41f8-8372-17c074d949f0	A sophisticated and distinguished bank in customer dealings, with a precise application and fast services.	muna aldagal	##########			0	en	us		5	ar	sophisticate distinguish bank customer dealings precise application fast service	Positive	1	0	0
Google Play Store	4d9971e4-d741-4981-a29b-cdf5c4bf72a7	Very bad today, it doesn't open and there is always a delay on it.	master almaghrabi	##########			0	en	us		1	ar	bad today doesnt open always delay	Negative	1	1	1
Google Play Store	9b7500ad-f697-4958-8ab4-b0e7df76b37b	If there is less, put it down.	Khaled Khashab	##########			0	en	us		1	ar	less put	Neutral	1	0	0
Google Play Store	5db8ea31-c829-4a37-93c8-a881be233380	There is no option to know the used and remaining balance of the additional card.	Ali Al-Madi	##########			1	en	us		5	ar	option know use remain balance additional card	Neutral	0	1	0
Google Play Store	2e1ff668-9353-4dbd-af66-ebf19e1d3fae	The application is completely useless, you need to visit the bank every time.	HUSSAM	##########			0	en	us		1	ar	application completely useless need visit bank every time	Negative	1	1	0
Google Play Store	5ae878f1-9734-41ff-b26f-3caa5f2a7592	The application is full of problems.	kerdame amine	##########			0	fr	us		1	ar	application full problems	Negative	1	0	0
Google Play Store	060d2030-513b-4611-a2ed-195f8d3fe5b1	Every two weeks they update for nothing, they don't change anything, and the application doesn't open properly. The service is really bad, to be honest, it's not beneficial for the consumer at all. I tried using it and I regretted it.	ayari nassira	##########			1	fr	us		1	ar	every two weeks update nothing dont change anything application doesnt open properly service really bad honest beneficial consumer try use regret	Negative	1	1	0
Google Play Store	2cf7c7e4-b7c3-4413-b957-103ac9ec0815	Broken Application	Taouali Okba	##########			0	fr	us		1	ar	break application	Negative	0	1	0
Google Play Store	4cf5466c-7e7f-43f1-a9a8-f54fa8fc931f	The bank is excellent.	محمد مالك	##########			1	ar	us		5	ar	bank excellent	Positive	0	0	0
Google Play Store	89d62294-d9f8-403b-92d2-a1bf478595a1	The latest update does not display the IBAN as it did before. Phone charging is fixed at a minimum of 100 SAR, which is unnecessary. Therefore, we request a reduction to around 20 SAR, like other banking applications, to make it more practical and considerate of our circumstances as residents who use the app regularly.	فضل المولى الجلال	##########			0	ar	us		3	ar	late update display iban phone charge fix minimum sar unnecessary therefore request reduction around sar like bank applications make practical considerate circumstances residents use app regularly	Negative	1	1	0
Google Play Store	6dfd2886-c6ef-4e6b-8eb7-f8f7085c4989	The application doesn't open.	محمد على	##########			0	ar	us		1	ar	application doesnt open	Negative	0	1	0
Google Play Store	5c2bf93d-6c6b-40ad-bd83-dcb0623a1e4d	Very excellent. May they be blessed with good health.	سليم العواضي	##########			0	ar	us		5	ar	excellent may bless good health	Positive	1	0	0
Google Play Store	45aece03-596b-4340-8670-09cbf9ee6a5e	The experience is very good.	ابو مالك الادريسي	##########			0	ar	us		1	ar	experience good	Positive	0	0	0
Google Play Store	c506ad00-ad0b-4df9-bfe2-6429aabcb53d	"It started to hang after the latest updates."	Masha -75	##########			0	ar	us		3	ar	start hang late update	Neutral	0	0	1
Google Play Store	6ecf577a-e2a6-4ee4-8d24-1ea3388f31c9	The SSS application is very bad, there is no development for the application. It is useless. Where are the supervisors of electronic communications in the bank? They must update the application. It does not open and has many problems.	عبدالرحمن الزهراني	##########			0	ar	us		1	ar	sss application bad development application useless supervisors electronic communications bank must update application open many problems	Negative	1	0	0
Google Play Store	ba8b535b-fc87-428c-b612-2398e286296b	I couldn't log into my account again. I have tried a thousand times and changed the password, but it was of no use.	ابو مازن العبيدي	##########			1	ar	us		1	ar	couldnt log account try thousand time change password use	Negative	0	1	0
Google Play Store	17acc758-0742-4533-bdac-6fe342ec2853	In the application, the account details are protected for display only, so I cannot download them. Please solve this problem as it is very annoying.	عبدالله الخميس	##########			0	ar	us		1	ar	application account detail protect display download please solve problem annoy	Negative	1	1	0
Google Play Store	724a4170-3f6c-4b7f-80a6-6ef1eff5c0db	Easy	Abdulmonim Badawi	##########			0	ar	us		5	ar	easy	Positive	0	0	0
Google Play Store	0f400fa1-396a-413a-84b5-394d754b617b	Good, but it doesn't accept the update.	ail ail	##########			0	ar	us		5	ar	good doesnt accept update	Negative	1	1	0
Google Play Store	870444b9-7d2c-4cc4-a21c-376ab4423d3a	The application is very bad, the worst banking application, it doesn't work, it causes disruption to customers' interests. It is better to withdraw the balance and close the accounts and switch to other banks with better services and more efficient transactions. It is even better to permanently close Al Jazeera Bank. Other banks are advancing and improving their services to retain customers, unli…	yaz ali	##########			2	ar	us		1	ar	application bad bad bank application doesnt work cause disruption customers interest good withdraw balance close account switch bank good service efficient transactions even good permanently close al jazeera bank bank advance improve service retain customers unlike al jazeera bank	Negative	1	1	0
Google Play Store	c3cae048-35fe-4172-998e-594586fbfcb9	Wonderful	Ashraf N	##########			0	ar	us		5	ar	wonderful	Positive	0	0	0
Google Play Store	f45e5eb0-41db-441d-a155-e0b23d47e2e9	The best bank in the world. In terms of security, it is better than international banks.	نوماس	2023-09-02 09:27:00			0	ar	us		5	ar	best bank world term security good international bank	Positive	0	0	0
Google Play Store	20dbe4b5-2d64-4dfe-ae31-920aed452a17	I enter the correct code, but I can't access my account. It tells me that I entered it incorrectly, even though it is correct.	Kaze	##########			0	ar	us		1	ar	enter correct code cant access account tell enter incorrectly even though correct	Negative	0	1	0
Google Play Store	b9cab8b0-af4c-434d-9686-9969912c36d1	Wonderful	عبداللطيف محمد	##########			0	ar	us		5	ar	wonderful	Positive	0	0	0
Google Play Store	4449894f-d0b6-4e2d-950e-0d4b96b99ace	Beautiful	محمد الجلال الجلال	##########			0	ar	us		5	ar	beautiful	Positive	0	0	0
Google Play Store	a12dba13-5cbc-4fcf-a48e-167e65b245ed	The application is not working.	hani hegazi	##########			0	ar	us		2	ar	application work	Negative	0	1	0
Google Play Store	3de3e0b9-04d2-4cf3-9544-e62c23088186	The application has become very bad and is no longer as it used to be before.	Ahmed UQU	##########			2	ar	us		1	ar	application become bad long use	Negative	1	0	0
Google Play Store	88eedd71-775d-494b-bcab-f0157e8452cf	A good application, and for those who it doesn't work for, (delete the application and reinstall it again).	mohamed saber	##########			1	ar	us		5	ar	good application doesnt work delete application reinstall	Positive	1	1	0
Google Play Store	86b9700c-29ba-4f37-aaac-316ceba28720	The worst banking application ever, it is so slow. I update it but there is no use.	reda bck	##########			0	ar	us		1	ar	bad bank application ever slow update use	Negative	1	0	1
Google Play Store	8015a6bd-5d31-4f9a-8c87-4de9ae05d276	Peace be upon you and the mercy of Allah and His blessings. I am surprised by the criticisms of bank customers about the poor performance of this application, as everyone is complaining about the application system and the difficulty of adding a beneficiary in an easy way, like Al Rajhi Bank, for example, and others. Also, I have not found any response from those responsible for this system in ad…	أسير المعروف	##########			0	ar	us		1	ar	peace upon mercy allah blessings surprise criticisms bank customers poor performance application everyone complain application system difficulty add beneficiary easy way like al rajhi bank example others also find response responsible system address customer feedback facilitate procedures application put customers benefit frankly sadden bank reach level await positive step attract customers love …	Negative	1	0	0
Google Play Store	dd5b77b3-cc43-4490-9ef7-bdd4e3c04fea	My work is without problems and further development.	ماجد الحربي	##########			1	ar	us		5	ar	work without problems development	Positive	0	1	0
Google Play Store	1f93d2a0-fb72-4889-9560-9444974df9a1	You have updated and then there is a technical problem and it doesn't work. You know Al Jazeera has become from bad to worse.	َ َ	##########			2	ar	us		1	ar	update technical problem doesnt work know al jazeera become bad bad	Negative	1	1	0
Google Play Store	545c40b9-3d7e-42ed-a955-8cd0263621fe	The application is very bad.	Hasan Ashour	##########			0	ar	us		1	ar	application bad	Negative	1	0	0
Google Play Store	8a8f2ee4-d589-4ff5-a95b-d83f11ba5034	The application is still hanging.	Matiz Dammaj	##########			0	ar	us		2	ar	application still hang	Neutral	0	0	1
Google Play Store	a319c2e4-67c5-4505-b58a-1bcd3fc702c9	There is a problem with the application, it does not open.	ابراهيم الكثيري	2023-08-07 08:57:00			1	ar	us		1	ar	problem application open	Negative	0	1	0
Google Play Store	d28bf35f-24ff-4d5f-a2e1-f5039326de9a	The application is very slow... and there are constant updating issues... and it has many malfunctions... on top of that, all services are disabled during weekends and holidays... where is the supervision? Where is the department of monitoring and development? You will never reach a stage of competition with other banks with such officials... 🫣🫣	ABO Motlak	##########			1	ar	us		1	ar	application slow constant update issue many malfunction top service disable weekend holiday supervision department monitor development never reach stage competition bank officials	Negative	1	1	1
Google Play Store	575906dd-a47e-4e06-9f93-666ca2730f7c	May God bless you.. Now the application is excellent, fast, and secure. However, there are some tips that do not reduce the strength of the application. Firstly, it prevents the user from running the application while dividing the screen. Secondly, it prevents the main interface of the application from taking a screenshot because this is dangerous. Enabling the application should be mandatory to …	naif naf10	##########			48	ar	us		5	ar	may god bless application excellent fast secure however tip reduce strength application firstly prevent user run application divide screen secondly prevent main interface application take screenshot dangerous enable application mandatory keep foreground avoid vulnerable hack prevent screen capture ability	Positive	1	0	0
Google Play Store	94d99040-c447-43c4-987a-75aca605f5ea	The application used to be very good, but now it's terrible. It crashes and freezes, and the phone is old.	ايمن امين الهلالي	2023-08-02 03:44:00			0	ar	us		1	ar	application use good terrible crash freeze phone old	Negative	1	1	1
Google Play Store	bd95270e-8a0b-4498-84f4-85ed37ab194a	Please review the customer feedback and work on improving the application. Thank you.	Ali Jahaf	2023-08-01 07:54:00			0	ar	us		1	ar	please review customer feedback work improve application thank	Neutral	1	0	0
Google Play Store	355260be-877d-4a99-bd01-5ecc17dd0f72	The application is not working.	فائز المالكي	##########			0	ar	us		1	ar	application work	Negative	0	1	0
Google Play Store	297a1e9d-4cdf-4f55-be82-4390ec2f9604	Very excellent.	ابوطلال الصديق	##########			0	ar	us		5	ar	excellent	Positive	0	0	0
Google Play Store	b4a9e017-3453-4dc8-8297-bf1b92620e9f	The supervisors of the application in deep sleep....nice dreams, my loved ones.	Dg Riyadh	##########			0	ar	us		1	ar	supervisors application deep sleepnice dream love ones	Positive	1	0	1
Google Play Store	ce4c886a-d156-4b08-9688-be3d47f3b34e	Dumb application, if you enter the account number to transfer, you won't see the name of the person you're sending to. So if you make a mistake with the number, your money will be lost. If I were CO, all of your IT staff would be terminated.	Moh ibra	##########			0	ar	us		1	ar	dumb application enter account number transfer wont see name person youre send make mistake number money lose co staff would terminate	Negative	1	1	0
Google Play Store	5534b71f-ad7d-4b32-87e5-aad0d7d482c6	The application stopped working and asks for an update, but there is no update available. It has become a burden on the phone and is of no use. We are waiting to use other bank accounts.	محمد الروبي	##########			7	ar	us		1	ar	application stop work ask update update available become burden phone use wait use bank account	Negative	0	1	0
Google Play Store	fca31cee-9cd2-4cae-b7a4-354dd9297bf6	Very bad application	رشيد العامري	##########			0	ar	us		1	ar	bad application	Negative	1	0	0
Google Play Store	ab102907-d1f0-4ac0-bed1-84a3348ca87f	May Allah reward you with goodness.	ابو اسحاق الحكمي	##########			0	ar	us		5	ar	may allah reward goodness	Positive	1	0	0
Google Play Store	abecbfed-bbd0-4bd6-ae0d-2659d5f99076	After the last update, I couldn't log in. I contacted the bank, but unfortunately, I didn't find a solution. Even the bank didn't respond properly, and when they did respond, they said I had a hardware problem. I have a Xiaomi phone, and I sent them a picture of the device. Unfortunately, I didn't receive any further communication.	ABDUL HAKEEM HASSAN	##########			0	ar	us		1	ar	last update couldnt log contact bank unfortunately didnt find solution even bank didnt respond properly respond say hardware problem xiaomi phone send picture device unfortunately didnt receive communication	Negative	0	1	0
Google Play Store	05bdc170-9828-4e1e-a4dd-728c329c2754	Done	NOUF ALHARBI	##########			0	ar	us		5	ar	do	Positive	0	1	0
Google Play Store	2add6f2f-5ed4-404a-a0fb-ab3388dab774	Very beautiful, may God bless you.	محمد أبراهيم	##########			0	ar	us		5	ar	beautiful may god bless	Positive	1	0	0
Google Play Store	4bf59d85-9746-4729-ad18-02f22a10f9be	Excellent effort, worthy of excellence and continuous progress 🌹	HANY SABRY	##########			0	ar	us		5	ar	excellent effort worthy excellence continuous progress	Positive	0	0	0
Google Play Store	3f2ef2f8-eb03-4bef-b319-0b876ded35f9	Very beautiful and a very very excellent treatment from the employees.	حسسووون حسسووون	##########			2	ar	us		5	ar	beautiful excellent treatment employees	Positive	0	0	0
Google Play Store	77d0cf44-5f5c-4765-83ea-c82220e72d91	Very fast application	Nice Gooo	##########			0	ar	us		5	ar	fast application	Positive	0	0	0
Google Play Store	709f91c2-bbef-419a-89a5-62ae4c849b21	Very excellent	مطنوخ يماني	##########			0	ar	us		5	ar	excellent	Positive	0	0	0
Google Play Store	18b37b80-bdf0-49d5-b88f-e0aed8f98716	excellent service	محمد مطر العجل	##########			0	ar	us		5	ar	excellent service	Positive	0	0	0
Google Play Store	ba6ee62e-325a-4981-bdc3-0330cd95ca0b	What works with me?	Ibrahim Harown	##########			1	ar	us		5	ar	work	Neutral	0	1	0
Google Play Store	7d58e01c-76d7-4262-967f-6a23e005e98d	A useful and courageous program. The fact that Al Jazeera Bank is steadily moving forward and truly deserves it. Their employees' behavior and services are very professional.	مستخدم Google	##########			6	ar	us		5	ar	useful courageous program fact al jazeera bank steadily move forward truly deserve employees behavior service professional	Positive	1	0	0
Google Play Store	39dae6f2-0233-4b6f-80b6-b6b962f26755	The application has become very bad, constantly crashing and not opening quickly unlike other banks. Please reconsider the application and solve this problem.	الباسل الباسل	##########			42	ar	us		3	ar	application become bad constantly crash open quickly unlike bank please reconsider application solve problem	Negative	1	1	1
Google Play Store	a7becfa6-b86c-4a41-bd9e-481cd4734596	The update is bad, it prevented me from logging in. It seems that the device has been rooted, but the device is official and intact. I can still open other banking applications like "Tawakkalna" and "Absher".	ابوناصر - سلمان الجبيري	##########			1	ar	us		1	ar	update bad prevent log seem device root device official intact still open bank applications like tawakkalna absher	Negative	1	1	0
Google Play Store	4edcd0ff-6784-4a96-8c14-aa268e69c52f	Very bad update, not to mention the lack of services compared to other banks. Since the last update, it no longer opens with the application.	ali bahri	##########			1	ar	us		1	ar	bad update mention lack service compare bank since last update long open application	Negative	1	1	0
Google Play Store	facc9896-17e4-479f-ad76-abb92d888847	Easy, comfortable, accuracy, and efficiency.	خالد ودالمعلم	##########			0	ar	us		5	ar	easy comfortable accuracy efficiency	Positive	0	0	0
Google Play Store	0234ef43-a93e-434f-8dfe-062686c4821c	Unfortunately, the latest update displays a message stating that the device is old and cannot use the application in it. 🤣🤣🤣💦💵 And the same problem existed in the previous update.	مهاب نجيب	2023-07-05 07:10:00			45	ar	us		1	ar	unfortunately late update display message state device old use application problem exist previous update	Negative	0	1	0
Google Play Store	1da33603-c386-4566-ae73-e289a8682d49	Thank you.	عرفان نزير	2023-07-05 03:50:00			0	ar	us		5	ar	thank	Positive	0	0	0
Google Play Store	284d9d22-f025-4a84-8a8a-ebe5c470d3cf	I wish there was an option to view account statements for more than a year, and you could add a filter for account statement transactions. This way, I could search only for transfer operations or deposits.	محتويات عامة	##########			2	ar	us		5	ar	wish option view account statements year could add filter account statement transactions way could search transfer operations deposit	Neutral	0	1	0
Google Play Store	401cfdbd-2959-400e-8b04-4b7bfa82aa6b	It is very bad and malfunctioning, I have been trying to fix it for three months.	علي القارح	##########			1	ar	us		1	ar	bad malfunction try fix three months	Negative	1	1	0
Google Play Store	ff5fc195-f434-4abd-a6e7-9d5c796e5531	The application is not working, it doesn't open. I deleted it and re-downloaded it, but it still doesn't open.	Ahmed Tarek Tarek	##########			1	ar	us		1	ar	application work doesnt open delete redownloaded still doesnt open	Negative	0	1	0
Google Play Store	3c4ea047-cbc5-45d9-afb0-8cde1e5c208a	It's bad and the application won't open.	ابو صهيب	2023-07-03 01:34:00			1	ar	us		1	ar	bad application wont open	Negative	1	1	0
Google Play Store	23bf036a-8913-4f0e-958a-8e4af1c2e320	Unfortunately, the worst banking application ... If you try several times with the wrong password, you cannot log in again using ATM card data.	Helal Al-Shuaibi	##########			11	ar	us		5	ar	unfortunately bad bank application try several time wrong password log use atm card data	Negative	1	1	0
Google Play Store	e4174b32-b5ac-4fb9-8777-84da773f4874	The program is not working.	Fahad Al thubaiti	##########			1	ar	us		1	ar	program work	Negative	0	1	0
Google Play Store	4750b4f1-f1a0-49c1-a2f6-792d265557ca	From best to worst, he has become extremely unsuccessful and can no longer work after the update.	عزوز القرشي	##########			1	ar	us		1	ar	best bad become extremely unsuccessful long work update	Negative	1	1	0
Google Play Store	aa71d37a-f82f-470c-917f-62eaa19cc36f	The application is very bad, after the update it never opens.	أم أسامه	##########			3	ar	us		1	ar	application bad update never open	Negative	1	1	0
Google Play Store	56856297-810b-46a4-91a6-164054bb99f1	Very bad after the update, it gives a message that the user or password is incorrect, and everything else is fine. I hope to solve the problem.	الخضر احمد	##########			26	ar	us		1	ar	bad update give message user password incorrect everything else fine hope solve problem	Negative	1	1	0
Google Play Store	5440d8d2-e00c-4325-9002-10c66c74d8fc	When downloading the latest update, the program does not open and gives an error message saying that the user or password is incorrect. Everything else is fine, please solve the problem.	الخضر العمرى	##########			1	ar	us		1	ar	download late update program open give error message say user password incorrect everything else fine please solve problem	Negative	0	1	0
Google Play Store	23f054b5-5b84-4984-a4d3-ec3eea9f0602	The worst update. When I enter my password, it tells me it's wrong. When I try to make a call, it tells me to choose number one. If I choose one, it tells me that I haven't entered anything and it's driving me crazy. This update is very bad.	هشام عبد الله	##########			1	ar	us		1	ar	bad update enter password tell wrong try make call tell choose number one choose one tell havent enter anything drive crazy update bad	Negative	1	1	0
Google Play Store	9ad5ac07-b568-4510-a950-0856c7331d1f	After the update, the application is not working.	Hazem Aljared	##########			1	ar	us		1	ar	update application work	Negative	0	1	0
Google Play Store	442c4ef5-5db6-4683-9426-d4dbacb492e5	The application does not open.	Muneer Hajaj	##########			1	ar	us		1	ar	application open	Neutral	0	1	0
Google Play Store	1691acb2-79bd-4bae-a7b6-296ac46892ff	Who are you to allow you to know my location? (The application requested permission to determine my geographic location, this is a blatant violation of my rights and my privacy and I will not allow it). The application will now be permanently deleted from my device until the location permission feature is cancelled and an apology is made to me for this mistake. If this condition is not reversed, …	ابو فيصل المُهاجر	##########			6	ar	us		1	ar	allow know location application request permission determine geographic location blatant violation right privacy allow application permanently delete device location permission feature cancel apology make mistake condition reverse transfer account another bank respect privacy customers	Negative	0	1	0
Google Play Store	785d3818-59ea-49fc-a80d-17c61963b52c	Great services	ناديه العتيبي	##########			0	ar	us		5	ar	great service	Positive	0	0	0
Google Play Store	83316a95-f9fa-4a31-80f5-41175a1954cb	The application has not been working for a week. What is the solution?	Yehya Hasan	##########			1	ar	us		1	ar	application work week solution	Negative	0	1	0
Google Play Store	a6e133a2-c658-46c0-8102-c5657902e297	"Nice, but I cannot get a statement from the exchange offices because I don't have one."	حسام محمد	##########			0	ar	us		5	ar	nice get statement exchange offices dont one	Negative	1	0	0
Google Play Store	b4452f6e-afeb-42f5-817e-af90f78500cd	It is excellent.	بكيل الجماعي	##########			0	ar	us		5	ar	excellent	Positive	0	0	0
Google Play Store	b78d0251-fae6-4e03-9e90-71da716adc57	Very, very, very excellent.	حسين كريري	##########			0	ar	us		5	ar	excellent	Positive	0	0	0
Google Play Store	d85e1dfd-f139-4868-8166-97aba0a45fdc	Once, the application is not opening for me. Every time I try to open it, it says the password or username is incorrect. They also say that I entered the wrong code three times, and so on. What is the solution? Please help me 🥺	_Lonly R	##########			2	ar	us		1	ar	application open every time try open say password username incorrect also say enter wrong code three time solution please help	Negative	0	1	0
Google Play Store	c8506281-2012-4c7f-8397-33e65016848b	Praise be to Allah, it was easy for us to go through many procedures, and a convenient and remarkable service. Thank you to AlJazira Bank and their dedicated work to satisfy the customers.	الشيخ عبدالله	##########			0	ar	us		5	ar	praise allah easy us go many procedures convenient remarkable service thank aljazira bank dedicate work satisfy customers	Positive	0	0	0
Google Play Store	6e6eef8d-0073-45b5-89a4-b67713e7db18	Their services are bad.	Saeed Al-Ahmari	##########			1	ar	us		1	ar	service bad	Negative	1	0	0
Google Play Store	dfc62b5e-7e79-4921-a67c-e44c8f739753	Excellent ... continuous improvement in service delivery ... we hope that you can provide the ability to transfer from the investment account to the current account through the application. May God bless you.	عويد الصبحي	##########			0	ar	us		5	ar	excellent continuous improvement service delivery hope provide ability transfer investment account current account application may god bless	Positive	1	0	0
Google Play Store	ae381c07-9b2c-4f4c-a512-73079f1a78e7	The application is so frustrating, it's really complicated. I forgot my username and I want to edit it, but it's not working at all. When I call them, they tell me to go to the application.	صالحه الاحمري	##########			0	ar	us		1	ar	application frustrate really complicate forget username want edit work call tell go application	Negative	1	1	0
Google Play Store	e434db0d-82a6-480c-bb61-2ecad00f9a7e	Wonderful	Sa As	##########			0	ar	us		5	ar	wonderful	Positive	0	0	0
Google Play Store	68913331-83c8-4ab2-9d52-6fbb41c1f9c7	After the recent update, credit cards no longer appear.	ali alasmari	##########			0	ar	us		1	ar	recent update credit card long appear	Neutral	0	1	0
Google Play Store	57c9365b-9d62-4f44-8922-157d6a9a2887	Beautiful	ابوشادي المطوع	##########			0	ar	us		5	ar	beautiful	Positive	0	0	0
Google Play Store	622cbfec-e50e-4e0e-ad06-b1501ddc28ac	It is dishonest to change once.	Saudi A	##########			0	ar	us		1	ar	dishonest change	Negative	1	0	0
Google Play Store	59331d2b-4cbc-4eb7-a9e6-44495fc29abe	It is very annoying, please stop entering. This program has caused us a lot of trouble, it is useless like the Bank of England and what is the situation.	ماجد النويصر	##########			0	ar	us		1	ar	annoy please stop enter program cause us lot trouble useless like bank england situation	Negative	1	1	0
Google Play Store	fbe72449-6642-48e4-b448-b91801ed04f2	Experimental beginning	بدران البدوري	##########			0	ar	us		5	ar	experimental begin	Neutral	1	0	0
Google Play Store	fc320bc5-fb11-4658-9b70-dd3110c2dc3e	Excellent from a long experience.	moh al-fozan	##########			0	ar	us		5	ar	excellent long experience	Positive	0	0	0
Google Play Store	7301fd07-e561-4191-a485-0b10105c9d17	The update is very bad... the application is very slow before it opens and sometimes it doesn't even open after entering the activation code. Please review the update urgently.	أبو محمد	##########			32	ar	us		1	ar	update bad application slow open sometimes doesnt even open enter activation code please review update urgently	Negative	1	1	1
Google Play Store	a2af2ab9-32f1-4d60-bd0c-7fc8fe440a67	The latest update messed up the program! It was working fine, but you messed it up with the latest update, honestly. Then the website asked for permission, which is a violation of privacy, and it's not your right as a bank to track my location during usage in the first place.	THE LEGEND	##########			16	ar	us		1	ar	late update mess program work fine mess late update honestly website ask permission violation privacy right bank track location usage first place	Negative	0	1	0
Google Play Store	46b3d678-ab5c-41d4-910a-a358a97911f2	Excellent	جنوبية الحنوبية	##########			0	ar	us		5	ar	excellent	Positive	0	0	0
Google Play Store	cbf10424-0d6d-4746-bbed-a13f4a167bd9	The application has turned for the worse. It used to be good, but now it asks for location activation and when activated, it stops and doesn't work. I wish you hadn't updated it.	فيصل الجهني	##########			0	ar	us		1	ar	application turn bad use good ask location activation activate stop doesnt work wish hadnt update	Negative	1	1	0
Google Play Store	eaf96ffe-0fff-4909-a483-91de6330e79d	Does not open/Not opened.	Mogahid Ahmed	##########			0	ar	us		1	ar	opennot open	Neutral	0	1	0
Google Play Store	40858423-bcd7-4b77-9abc-8579f4f8051a	Excellent and easy to use. May God bless you.	سعيد الناصري	##########			0	ar	us		5	ar	excellent easy use may god bless	Positive	0	0	0
Google Play Store	1d50b183-f938-48df-9911-7dfa0dd881ee	The worst application, the worst employees, and the worst bank.	سالم الشيخ	##########			0	ar	us		1	ar	bad application bad employees bad bank	Negative	1	0	0
Google Play Store	a0222da6-8784-49a9-9867-309770112064	Problem: New user activation and card activation. Thank you.	ريان َ	##########			0	ar	us		1	ar	problem new user activation card activation thank	Neutral	0	1	0
Google Play Store	b374f9ab-dfaf-4cb5-b283-37c5c95313a8	Beautiful	Fattom Fattom	##########			0	ar	us		5	ar	beautiful	Positive	0	0	0
Google Play Store	1b721a03-84f8-4987-9c36-e839647ed1d5	Excellent very much	الدولي ابوامل	##########			0	ar	us		5	ar	excellent much	Positive	0	0	0
Google Play Store	b3709e32-15f8-45cf-b382-8fb37620c1b8	When adding a beneficiary, the call from the bank comes to confirm the addition and they give you a code. Then the internet is disconnected when the call arrives, causing you to fail to enter the code.	ابو خطاب	##########			0	ar	us		5	ar	add beneficiary call bank come confirm addition give code internet disconnect call arrive cause fail enter code	Neutral	0	1	0
Google Play Store	498d62d5-68f5-4fd8-8bd6-6dd14a47edbc	Very bad, I still cannot create an account on it. It always gives me an error in the password or username. Make programs like others or leave us alone completely.	غريب الدار للرقية والتأويل	##########			11	ar	us		1	ar	bad still create account always give error password username make program like others leave us alone completely	Negative	1	1	0
Google Play Store	bd89a407-d96f-4629-8f62-c7fb224565c7	Smooth and easy to deal with.	عمر بادحدح	##########			1	ar	us		4	ar	smooth easy deal	Positive	0	0	0
Google Play Store	43ea72be-dae2-47a0-b13a-dbc2d2fe6f6f	The application is excellent, but there is a problem when transferring to Sudan. The Sudanese currency does not appear, so you cannot know how much you have transferred to the person.	Et F	2023-06-08 08:26:00			0	ar	us		5	ar	application excellent problem transfer sudan sudanese currency appear know much transfer person	Negative	1	1	0
Google Play Store	a4b87ab0-1779-48f9-bd0b-3099b3cc73ae	Very bad, I lodged a complaint about depositing a cash amount that got stuck in the ATM machine and it dispensed money without returning or refunding it. When I filed the complaint, they gave me a 5-day deadline, but the 5 days have passed and I haven't received the amount back, nor has anyone contacted me.	المطحني جيمنج /Almthane	##########			0	ar	us		1	ar	bad lodge complaint deposit cash amount get stick atm machine dispense money without return refund file complaint give day deadline days pass havent receive amount back anyone contact	Negative	1	1	0
Google Play Store	26553999-8c2f-47bd-8ed5-67f14bf4a137	Beautiful application and beautiful services. You deserve to be thanked for your efforts, as those who do not thank people will not be thanked by God. Thank you for what you provide to your customers. We wish you further progress and growth. I would also like to thank Mr. Faisal Al-Ghassan for his assistance and appreciated efforts in supporting me and recovering my account. I hope to see you in …	ابو أسيل	##########			0	ar	us		5	ar	beautiful application beautiful service deserve thank efforts thank people thank god thank provide customers wish progress growth would also like thank mr faisal alghassan assistance appreciate efforts support recover account hope see high position tell may remain helpful person whose brilliance never fade offer customers best regard	Positive	1	0	0
Google Play Store	5ba5e1cd-0939-4099-bd22-4ecc671a17e0	I couldn't activate instantly, how do I do that?	ramy alnor	2023-06-04 07:07:00			0	ar	us		2	ar	couldnt activate instantly	Negative	0	1	0
Google Play Store	276a08c4-28df-41a9-810c-30222717a50e	It is very annoying that every time I enter the application, the password is always incorrect. every time I enter the password, it fails.	علوووش ال علوش	##########			0	ar	us		1	ar	annoy every time enter application password always incorrect every time enter password fail	Negative	1	1	0
Google Play Store	26d491a0-3e6f-49b8-aa03-d8be1c9a2a6b	Under trial/experiment	وهيب ابو ناظم	##########			0	ar	us		5	ar	trialexperiment	Neutral	1	0	0
Google Play Store	4b369b9c-3e4d-4114-bdc4-e30285639878	Very, very awesome. I hope the future is much better.	مأوى محبوب السبحان	##########			0	ar	us		5	ar	awesome hope future much good	Positive	0	0	0
Google Play Store	536bba40-50da-464f-b278-3b846f56682f	The bank is bad, so how can the application be?	Al Aal	##########			0	ar	us		1	ar	bank bad application	Negative	1	0	0
Google Play Store	62d597ef-41de-4b3e-8380-9e5548d0ab21	There is no description that accurately expresses how bad this application is, it deserves less than one star, period.	ابو عبدالله	##########			0	ar	us		1	ar	description accurately express bad application deserve less one star period	Negative	1	0	0
Google Play Store	401cff75-8b0f-4a20-a5af-4478a5743b1d	The application is very very bad, it constantly freezes.	فهد حاشم الشمري	##########			0	ar	us		1	ar	application bad constantly freeze	Negative	1	0	1
Google Play Store	d37b580f-9312-4631-a5ff-247261d30bad	It used to be one of the best and easiest programs, but now, with no further development and the emergence of other banking applications, it has become obsolete. Other banks have developed their applications, unlike what it was four years ago.	عمران الحريري	##########			7	ar	us		2	ar	use one best easy program development emergence bank applications become obsolete bank develop applications unlike four years ago	Negative	1	0	0
Google Play Store	89675fa8-027f-48de-a3f6-81885a2ef84d	An outdated application compared to other banking applications	Fal Con	##########			0	ar	us		2	ar	outdated application compare bank applications	Negative	1	0	0
Google Play Store	08c3b97f-553e-4074-aa10-2848a0be531f	May Allah reward him with goodness.	ابراهيم حسن	##########			0	ar	us		5	ar	may allah reward goodness	Positive	1	0	0
Google Play Store	d82aed13-4634-4889-8701-d0647ce29229	Masha Allah Tabarak Allah, it's a great application that benefited me a lot.	Taha Mohtasib	##########			0	ar	us		5	ar	masha allah tabarak allah great application benefit lot	Positive	0	0	0
Google Play Store	77b3a1a9-5843-4137-9fa6-aff7fcd49885	Good.	عصام مجسن	##########			0	ar	us		5	ar	good	Positive	0	0	0
Google Play Store	3bd40469-c375-4fdb-b99d-d8003cf5ef0c	Very good, thank you very much.	فهد المولد	##########			0	ar	us		5	ar	good thank much	Positive	0	0	0
Google Play Store	95e3a807-c85e-4fe1-9e89-3d719942d95e	The application is excellent, may Allah bless you.	عماد حتحت	##########			0	ar	us		5	ar	application excellent may allah bless	Positive	1	0	0
Google Play Store	d284a695-d970-41bb-ad96-e4ca05c2d85c	I changed the exchange number and now it's not allowing me to access the application. I can't make any transfers.	Dlool 290	##########			0	ar	us		1	ar	change exchange number allow access application cant make transfer	Negative	0	1	0
Google Play Store	6c1fd9ec-2948-4f7d-aa2d-d290dd91ae02	Excellent	AHMED ALI RASHID	2023-05-03 07:39:00			0	ar	us		5	ar	excellent	Positive	0	0	0
Google Play Store	74835c38-10da-47ca-8e7b-9a4e6074d687	May Allah bless you and have mercy on your parents, oh strong Saudi bank. 👍🌹	أحمد بن عبدالرحمن	2023-05-03 05:51:00			0	ar	us		5	ar	may allah bless mercy parent oh strong saudi bank	Positive	1	0	0
Google Play Store	6075ff9d-acf7-451f-aedd-eec4dad09b3a	Excellent	صالح عامر	2023-05-02 03:35:00			0	ar	us		5	ar	excellent	Positive	0	0	0
Google Play Store	2f9f8108-1b17-41e6-ae11-8c36745dc3c3	Excellent, very, very, very, very, very, very, very, very	ظافر العمري	##########			0	ar	us		5	ar	excellent	Positive	0	0	0
Google Play Store	2515ded2-b638-401f-8e50-59b27fa06882	I haven't been able to access my account for a while. It keeps saying that the username or password is incorrect, even though I'm certain of the password.	علي محمد	##########			0	ar	us		1	ar	havent able access account keep say username password incorrect even though im certain password	Negative	0	1	0
Google Play Store	66da1419-360a-4d92-9d4b-77a4091d0f25	A value-added tax is deducted on purchases and also a service fee is deducted on top of it. I have money and I withdraw, but it says your balance is insufficient.	وجدي حكيم المسلمي	##########			0	ar	us		1	ar	valueadded tax deduct purchase also service fee deduct top money withdraw say balance insufficient	Negative	1	1	0
Google Play Store	11d21132-3300-4b58-9b5e-0e1165a46c8b	We try and evaluate.	Saltan Al Aeashe	##########			0	ar	us		2	ar	try evaluate	Neutral	0	1	0
Google Play Store	135dc604-3789-4a50-8881-d641c27403cf	The application is very, very bad. I regret leaving Banque Al-Bilad, their application is easy, fast, and great, unlike this terrible application. Even their branch that I visited was very bad. I highly do not recommend this bank at all.	ابو حاتم	##########			0	ar	us		1	ar	application bad regret leave banque albilad application easy fast great unlike terrible application even branch visit bad highly recommend bank	Negative	1	0	0
Google Play Store	8921cd27-9177-44b2-8e5d-1d6d6ff478e6	Dear respected brother, the application does not show my account, it does not appear when I try to transfer, and my account does not appear active nor do the funds appear.	سلمان الحزمي	##########			0	ar	us		1	ar	dear respect brother application show account appear try transfer account appear active fund appear	Negative	0	1	0
Google Play Store	3b08462f-d062-4ec3-8146-a5573451021c	Very very wonderful	عبودي هزازي	##########			0	ar	us		5	ar	wonderful	Positive	0	0	0
Google Play Store	4093bcfb-7a3c-4d3f-bd9f-0b2d09f61074	Very, very automated.	jalal noorhuusein	##########			0	ar	us		5	ar	automate	Negative	0	1	0
Google Play Store	76c71200-4108-4b1f-8b02-7cc8d62975a9	Good	عدنان الظراسي	##########			0	ar	us		5	ar	good	Positive	0	0	0
Google Play Store	ebd0a626-090b-4aca-b346-56c0daeb27ac	I was unable to add an instant beneficiary for the international transfer. I received an error notification saying that it is unnecessary and I must log out.	Abdulgadir Shiryani	##########			7	ar	us		1	ar	unable add instant beneficiary international transfer receive error notification say unnecessary must log	Negative	0	1	0
Google Play Store	97f9d947-5324-4883-a776-02c3b92dffd8	There is nothing new, oh Bank AlJazira. All the banks are evolving except you, from bad to worse. Neither Zain's application nor Zain Bank's service is worse than the bank I have ever dealt with in my life.	Ś ' 10 :	##########			0	ar	us		1	ar	nothing new oh bank aljazira bank evolve except bad bad neither zains application zain bank service bad bank ever deal life	Negative	1	0	0
Google Play Store	0ea5e94f-4fe8-44f9-8da0-d3b50a7ee87d	nice and beautiful, very wonderful.	مشاري سعد علي القحطاني آل سعد2	##########			0	ar	us		5	ar	nice beautiful wonderful	Positive	0	0	0
Google Play Store	646d2e0d-2ff3-4ff8-8d9b-cccae091d277	Wonderful program	أبو بشير	##########			0	ar	us		5	ar	wonderful program	Positive	0	0	0
Google Play Store	b60151b3-ce3d-477d-9956-c55812159d3d	The application used to be good. Now it is very bad. When adding a new beneficiary for money transfer and completing all the information, upon receiving the call for the secret code, the application closes without any reason. With repeated failed attempts, adding another beneficiary becomes a kind of torture. When the customer confirms the addition, they should activate the account immediately in…	Mahmoud Alshehri	##########			85	ar	us		1	ar	application use good bad add new beneficiary money transfer complete information upon receive call secret code application close without reason repeat fail attempt add another beneficiary become kind torture customer confirm addition activate account immediately instead give number activate beneficiary	Negative	1	1	0
Google Play Store	0a725a49-51c9-422e-ad3a-72700439b7fd	The verification code takes a long time and often fails, causing frustration. Please find a solution.	Fars 18	##########			0	ar	us		1	ar	verification code take long time often fail cause frustration please find solution	Negative	1	1	1
Google Play Store	8779a9a8-a872-4911-a87f-414724650e42	Excellent services.	Wad Elhag Alkango	##########			0	ar	us		5	ar	excellent service	Positive	0	0	0
Google Play Store	429cb8e9-f7a3-4cf1-9179-17c6a3f82cf1	Many things are easy, thank you.	عمر الغامدي	##########			0	ar	us		5	ar	many things easy thank	Positive	0	0	0
Google Play Store	2a3f723d-205e-46a6-ad97-32515ea1bc72	Excellent	ياسر الحازمي	##########			0	ar	us		5	ar	excellent	Positive	0	0	0
Google Play Store	ce03995f-a229-44fd-a66c-0c039b23c9e7	The application is not working. I want to recharge the credit card, but it says the process is not available at this time. Please update the program.	waleed Al owfi	##########			0	ar	us		1	ar	application work want recharge credit card say process available time please update program	Negative	0	1	0
Google Play Store	2bcab87d-ed16-456c-b852-5ebfd961a8d8	The application exits from the options through a bank connection to confirm or hear the PIN. Why not have a text message first and then a phone call for confirmation? It's complicated.	فارس الميدان	##########			3	ar	us		1	ar	application exit options bank connection confirm hear pin text message first phone call confirmation complicate	Neutral	1	1	0
Google Play Store	bac5369a-1b1d-409a-9609-f2b475a08140	Very good, I hope to add the offers in the same application and create a dedicated application for the Awaaq Card.	محمود Mahmood الزيد Al Zaid	##########			3	ar	us		4	ar	good hope add offer application create dedicate application awaaq card	Positive	1	1	0
Google Play Store	1856b543-2e59-4954-8cf9-224ce633c528	Excellent	ali_ aljafari	##########			0	ar	us		5	ar	excellent	Positive	0	0	0
Google Play Store	d0ea795c-7aa6-4670-abe0-1f564b5b8bf1	The worst application you can ever see in your life. I forgot the password and every time I try to recover it through the phone call they make and give me 4 numbers each time within the verification period which is 60 seconds. The call starts in the last 10 seconds, so the verification period is over. I have repeated this more than 50 times and every time the same situation.	Abdo Ward	2023-03-07 05:27:00			0	ar	us		1	ar	bad application ever see life forget password every time try recover phone call make give number time within verification period second call start last second verification period repeat time every time situation	Negative	1	1	0
Google Play Store	76fcf895-2f7b-45d2-b946-fd0d37f0e446	Excellent	Ttff Gggh	##########			0	ar	us		5	ar	excellent	Positive	0	0	0
Google Play Store	d24796a4-a833-428f-9850-4d11e46bbb52	A very excellent application, I have transferred to Yemen several times and did not face any problems.	Haythm Alkbous	##########			1	ar	us		5	ar	excellent application transfer yemen several time face problems	Positive	1	1	0
Google Play Store	da88059a-adfe-4965-b422-450ee639aff1	The application is very bad.	بثوث وسنابات عادل وداروين واياد ومعاذ	##########			0	ar	us		1	ar	application bad	Negative	1	0	0
Google Play Store	35fb5c6b-709d-4497-81c8-ba14d2c29080	I registered and everything is sorry, sorry.	Abo Raad	##########			0	ar	us		1	ar	register everything sorry sorry	Negative	0	1	0
Google Play Store	bc155b61-3745-433d-91ed-9a537c47dc59	The program doesn't open for me on the iPhone and Android.	عبدالله عبدالعزيز	##########			0	ar	us		1	ar	program doesnt open iphone android	Negative	0	1	0
Google Play Store	1c4a70e5-6743-44ee-b066-3effab94a950	Honestly, the application is bad. I did everything and received the card, but the account number and IBAN do not appear. After contacting the bank, they provided me with the IBAN, so I made a small transfer. However, no funds have been received so far.	جمال الهلالي	##########			7	ar	us		1	ar	honestly application bad everything receive card account number iban appear contact bank provide iban make small transfer however fund receive far	Negative	1	1	0
Google Play Store	df90a28c-9065-4e6a-a89b-628b574fce4a	Very very bad application	mohamed hassan	##########			0	ar	us		1	ar	bad application	Negative	1	0	0
Google Play Store	0b4e3cdc-3345-4f09-82d4-80cae0278ffa	The application is not working when you want to convert and select the recipient. It says there are no available options. Please make the necessary adjustments.	نور الهدى	##########			4	ar	us		1	ar	application work want convert select recipient say available options please make necessary adjustments	Negative	0	1	0
Google Play Store	1d4625c4-f1ad-448e-900a-ad7d1ee45fb0	Excellent, very very very good.	‪ADAM “‫ابو الدنيا‬‎” ADAM‬‏	##########			0	ar	us		5	ar	excellent good	Positive	0	0	0
Google Play Store	49a3a373-b75a-4acd-9747-9d96f1e8e7c6	Excellent experience deserving 5 stars.	ALMKKY ALNOUR	##########			2	ar	us		5	ar	excellent experience deserve star	Positive	0	0	0
Google Play Store	0fe8c59c-dc1e-4c87-acd4-287b5b50c3a3	This program is really bad, the bank doesn't care about its own application.	فيصل الكعبي	##########			0	ar	us		1	ar	program really bad bank doesnt care application	Negative	1	0	0
Google Play Store	e6f5c756-ca2e-430e-9fd3-ad0a3c8e96f5	A bad application, I can only update my ID by going to the branch.	Hema Nassar	##########			0	ar	us		1	ar	bad application update id go branch	Negative	1	1	0
Google Play Store	5f8d354c-d8f6-4aa7-9af2-969ac24008af	A very bad application, it has been 3 months and I have been trying with it. I finish entering the information and it tells me that the password or username is incorrect, and you have tried to login three times and so on, even though I haven't tried and it doesn't bother me. I change the password and start over. I deleted the application and reinstalled it hoping for a result, but there is no des…	Zahra Alsultan	##########			2	ar	us		1	ar	bad application months try finish enter information tell password username incorrect try login three time even though havent try doesnt bother change password start delete application reinstall hop result desire outcome	Negative	1	1	0
Google Play Store	c6b8b057-e729-4b43-b618-6cdbf864d7b1	It needs a software review, and it is not user-friendly, especially for non-professionals or ordinary people... Please attach explanatory videos about how to use the application, as well as tips on input and selection methods, and solving common problems.	bakri abdalhafiz	2023-02-03 05:27:00			0	ar	us		1	ar	need software review userfriendly especially nonprofessionals ordinary people please attach explanatory videos use application well tip input selection methods solve common problems	Negative	1	1	0
Google Play Store	e32cdc46-e641-48ac-a093-acb360a37c62	The bank deserves thanks, their services are excellent. I hope for more success, progress, and prosperity. May Allah bless you.	MHND KHAMIS	##########			1	ar	us		5	ar	bank deserve thank service excellent hope success progress prosperity may allah bless	Positive	1	0	0
Google Play Store	d8e96585-14cb-44ab-88fe-47e4884cc856	Very very good	سعد عبدالمالك الشميري	##########			0	ar	us		5	ar	good	Positive	0	0	0
Google Play Store	158508a7-6e54-4966-95c3-ca98a92c5bd1	Very very beautiful.	حسبو ودالمدني المسلمي	##########			0	ar	us		5	ar	beautiful	Positive	0	0	0
Google Play Store	1fe0493b-c179-4bd7-a174-c0eba76907b9	The application is a failure, it does not open, and it is very bad.	ayed al	##########			0	ar	us		1	ar	application failure open bad	Negative	1	1	0
Google Play Store	b59d297a-716d-4e3f-b168-1e8f242dd9fc	Not understandable in entry.	ابو مؤيد	##########			0	ar	us		5	ar	understandable entry	Negative	1	0	0
Google Play Store	51e819d2-f046-46fc-bc1b-e9059d2e2738	Excellent	عبدالله حسن ال حسناء	##########			0	ar	us		5	ar	excellent	Positive	0	0	0
Google Play Store	a9707b6c-5669-4b55-a2c5-95c0e6c5d3d9	Unfortunately, the treatment is not appropriate for customers and for a bank in this generous country.	ABDULLAH AL-IBDAN	##########			0	ar	us		1	ar	unfortunately treatment appropriate customers bank generous country	Negative	1	0	0
Google Play Store	82074610-f59c-4533-b206-6b5354b3c41c	"The worst and worst application in banking applications, I register fifty times and it opens, then it tells me that I entered the password or username incorrectly, knowing that the data is correct."	Mohamed Aly	##########			0	ar	us		1	ar	bad bad application bank applications register fifty time open tell enter password username incorrectly know data correct	Negative	1	1	0
Google Play Store	c7dd99ce-7e05-41f6-9ebf-6a8a572a5137	Great	عمر محمد حمد	##########			0	ar	us		5	ar	great	Positive	0	0	0
Google Play Store	a0ea5054-2303-4a97-9003-990124cbb436	I downloaded the application and it worked immediately, but I couldn't log out as the icon disappeared from my device and I am still trying to log out.	e7sas abo ahmad	##########			1	ar	us		4	ar	download application work immediately couldnt log icon disappear device still try log	Neutral	0	1	0
Google Play Store	548420a1-a1dc-4cf9-87b7-b1203a870fd9	Excellent option and good treatment.	مختار العريقي	##########			1	ar	us		5	ar	excellent option good treatment	Positive	1	0	0
Google Play Store	6dc2836b-80d8-4b8c-a94f-0fae96ed8da7	I would rate it with one star for comments only. The program is weak, I couldn't create an account, and the email appeared in a wrong way. Ha ha ha! Ha ha ha ha!	معاذ الحميدي	##########			0	ar	us		1	ar	would rate one star comment program weak couldnt create account email appear wrong way ha ha ha ha ha ha ha	Negative	1	1	0
Google Play Store	98ae8b39-2bed-4ee8-8868-a34d957e38b1	Excellent	Ali Mursi	##########			0	ar	us		4	ar	excellent	Positive	0	0	0
Google Play Store	6b5b641a-8bff-4317-bda7-f06fb2afaec4	The application is very bad. Its function is to raise the client's blood pressure. You enter all the data correctly and it tells you it's wrong. When you try to reset your password, it asks for your ID, then you receive a call and have to leave the application to press number one for recovery. Many problems, I've been trying for two hours and it's useless. It just raises my blood pressure for no …	Khalid Al Amoudi	##########			4	ar	us		1	ar	application bad function raise clients blood pressure enter data correctly tell wrong try reset password ask id receive call leave application press number one recovery many problems ive try two hours useless raise blood pressure reason	Negative	1	1	0
Google Play Store	a879a07a-7c1f-40ef-8be4-32d180b95b64	Very excellent	حسن احمد	##########			0	ar	us		5	ar	excellent	Positive	0	0	0
Google Play Store	6e961faa-a7be-42cf-91de-4f785358d4e3	Very, very excellent	عبدالعال علي	##########			0	ar	us		5	ar	excellent	Positive	0	0	0
Google Play Store	c157bae5-0987-49ea-8d62-6a5e350042a3	The AlJazira Bank application is one of the best programs, honestly.	Hussein Faisal	##########			1	ar	us		5	ar	aljazira bank application one best program honestly	Positive	0	0	0
Google Play Store	c19648db-8a07-4e89-bef5-0f68753dfc4e	Every update is worse than the previous one.. the application keeps freezing!!	فهد البدراني	##########			11	ar	us		1	ar	every update bad previous one application keep freeze	Negative	1	0	1
Google Play Store	b511e84f-e421-48de-b8d6-71e1c867fa54	Beautiful application	عيسى جابر	##########			0	ar	us		5	ar	beautiful application	Positive	0	0	0
Google Play Store	3a12c408-2449-4823-9aaf-773d673515ad	Wonderful	Mahmoud Yahia	##########			0	ar	us		5	ar	wonderful	Positive	0	0	0
Google Play Store	b05fde23-acea-46fe-832d-10b789c8e742	Wonderful	محمد زميم	##########			0	ar	us		5	ar	wonderful	Positive	0	0	0
Google Play Store	60248a69-c5db-4c98-9136-ccf9a8632acb	Masha Allah, blessed be the merciful.	بدر الدين الصليحابي	##########			0	ar	us		5	ar	masha allah bless merciful	Positive	0	0	0
Google Play Store	056c4c63-d31e-44d0-b001-17eba1ea6a7a	The program is exhausting, unsuccessful, and trash, and the officials are absolutely unsuccessful in providing a user-friendly program. You enter the customer's name and password and it says 'error'. They are The worsts.	سعد السعد	##########			0	ar	us		1	ar	program exhaust unsuccessful trash officials absolutely unsuccessful provide userfriendly program enter customers name password say error bad	Negative	1	1	0
Google Play Store	4681b6a2-ab85-4fca-a457-189791c5689c	"An easy, useful, and fast application that we hope it will be further developed to include broader services."	نادر صديق	##########			1	ar	us		5	ar	easy useful fast application hope develop include broad service	Positive	0	0	0
Google Play Store	0cd4bd7c-26f2-4331-86b7-2fcb54ba256d	"Who are the best banks, may God bless you."	عبدالرحمن سليمان عبدالرحمن	##########			0	ar	us		5	ar	best bank may god bless	Positive	0	0	0
Google Play Store	35c4d2fb-416e-4c03-822f-85db701eb814	Powerful application Thank you all	Mo55f M	##########			0	ar	us		5	ar	powerful application thank	Positive	0	0	0
Google Play Store	7abe3353-1441-4b6d-9d30-a90306a62daf	"By Allah, you're a dog."	سراج الدعدي	##########			0	ar	us		1	ar	allah youre dog	Neutral	1	0	0
Google Play Store	ce45a6ee-6dd0-4040-9237-a6511aafc9f6	Previously, the option to securely purchase online appeared and you could activate and deactivate it. However, now the secure online purchasing option via Mada cards is not available.	عزيز خالد	##########			0	ar	us		1	ar	previously option securely purchase online appear could activate deactivate however secure online purchase option via mada card available	Neutral	0	1	0
Google Play Store	dbd028dc-84ef-4aee-ba12-75c7793c6129	I would like to solve a problem of an error in the system. Every time I enter the application, an error in the system occurs. What could be the cause? It has been happening for a whole month.	محمد العنزي	##########			0	ar	us		4	ar	would like solve problem error system every time enter application error system occur could cause happen whole month	Negative	0	1	0
Google Play Store	e63a16fe-e80b-44b8-9655-0b68b7c32ce6	Honestly, I don't recommend sending a transfer through the application and then following up on it. It happened to me more than once, unfortunately.	نجيب البركاني	##########			4	ar	us		1	ar	honestly dont recommend send transfer application follow happen unfortunately	Negative	1	0	0
Google Play Store	76c72e85-0632-4325-9788-feacc3042a4e	Excellent very much ..	حافظ الطريقي	##########			0	ar	us		5	ar	excellent much	Positive	0	0	0
Google Play Store	0fe6f7a3-b0f9-45f8-ae85-658d72802d68	I cannot do it immediately, there is always an error.	هاني 8876	##########			1	ar	us		1	ar	immediately always error	Negative	0	1	0
Google Play Store	cc857919-ba51-4809-9d1d-5fe3757dfeae	Excellent	Amrbadra2030	##########			0	ar	us		5	ar	excellent	Positive	0	0	0
Google Play Store	69a1fa8e-18ab-494c-a28c-602fa2223704	Excellent and safe.	قصي صدام	##########			0	ar	us		5	ar	excellent safe	Positive	0	0	0
Google Play Store	cdf7c70b-c1b6-4621-9d3b-c3c4fb89c128	The app does not open.	سليم القائدي	##########			0	ar	us		1	ar	app open	Negative	0	1	0
Google Play Store	37538abd-6a36-40d6-ab9d-49298241b22b	Hello, I have a problem with the Al Jazeera Bank Smart application. Can you please solve this issue as soon as possible? The problem is when I enter the Al Jazeera Bank Smart application, I enter my login details (password and username), and then the application sends me the same message in a different color, apologizing for the inconvenience and stating that there was a system error. Please try …	حسام سليمان علي العطيفي العبدلي	##########			1	ar	us		1	ar	hello problem al jazeera bank smart application please solve issue soon possible problem enter al jazeera bank smart application enter login detail password username application send message different color apologize inconvenience state system error please try late problem occur multiple time whenever access application please solve problem soon possible peace upon	Negative	0	1	0
Google Play Store	9d0dfbb1-0cbf-476c-9240-472360d14dea	An unprecedented application that I have never seen before.	Mohammed Alhmury	##########			0	ar	us		5	ar	unprecedented application never see	Positive	1	0	0
Google Play Store	8eb4bcc1-39b5-4890-983e-8bfaeb56fe2c	There has been a lot of development in the application.	الصدوق بوفهد	##########	عزيزي نعتذر لإستياءك و نحن هنا لخدمتك تفضل بالتواصل معنا على 920006666 و شكراً لك .	2020-05-08 02:55:00	1	ar	us		4	ar	lot development application	Positive	1	0	0
Google Play Store	fde52f17-2eb3-4e6c-9b3a-f09218bd4ad0	It doesn't work for me because of the username. Does the bank send me the username in a message?	سمير ٣ الهركلي	##########			0	ar	us		5	ar	doesnt work username bank send username message	Negative	0	1	0
Google Play Store	f06c9b02-4378-4b91-bee2-8922498d3072	Special services available at your branch in Hafar Al-Batin	علي الجريوي	##########			1	ar	us		5	ar	special service available branch hafar albatin	Neutral	0	1	0
Google Play Store	757f9655-296f-4d49-9e01-eda781807ce4	Thank you, Al Jazeera Bank.	سامي الجهني	##########			0	ar	us		5	ar	thank al jazeera bank	Positive	0	0	0
Google Play Store	b587fe99-0553-48de-8939-812de73ce7d0	Wonderful	عبود الشماع	##########			0	ar	us		5	ar	wonderful	Positive	0	0	0
Google Play Store	fec5a7e5-a9d6-4c8e-af90-0fc49fdba486	The application is extremely bad. It was excellent initially, but recently it has become very bad. When trying to login to the application, it shows an incorrect password or incorrect username even though the data is correct. It only opens when resetting the password again.	الطائر المهاجر	##########			18	ar	us		1	ar	application extremely bad excellent initially recently become bad try login application show incorrect password incorrect username even though data correct open reset password	Negative	1	1	0
Google Play Store	ef9847ca-09fd-46bd-9858-62a1521442ca	Very sorry, this cannot work with the Huawei device, as it does not support Google.	عبد المجيد محمد جمعة	##########			0	ar	us		1	ar	sorry work huawei device support google	Negative	0	1	0
Google Play Store	1df21ca3-8bd2-4d8a-82d4-267bc89e88ab	Excellence	وضاح علي حاتم	##########			0	ar	us		5	ar	excellence	Positive	0	0	0
Google Play Store	6ff2ef16-d544-458b-8f73-74b95049e48e	More than excellent.	AWADH MOH.D	##########			0	ar	us		5	ar	excellent	Positive	0	0	0
Google Play Store	3954b833-34c5-4108-9a86-de127073dbc9	Excellent deserves 5 stars.	بخيت رحمه جماع بدوي	##########			0	ar	us		5	ar	excellent deserve star	Positive	0	0	0
Google Play Store	121cb4cf-e742-48b2-9a64-ea9379f03587	Excellent	Chef. Abo Karma	##########			0	ar	us		5	ar	excellent	Positive	0	0	0
Google Play Store	beca7990-fa46-4851-ad82-4e784dcc5bed	My device is Samsung Galaxy Fold 3 and the application keeps crashing immediately after opening. I have tried uninstalling and reinstalling it, but it still continues to crash without any reason. Please solve this problem quickly.	Shuaib Mansoor Al-Daggag	##########			1	ar	us		1	ar	device samsung galaxy fold application keep crash immediately open try uninstalling reinstall still continue crash without reason please solve problem quickly	Negative	0	1	0
Google Play Store	1e6f5e55-8f68-4821-9768-2f57da89be97	Excellent, good luck.	naif aklan	##########			0	ar	us		5	ar	excellent good luck	Positive	0	0	0
Google Play Store	d135d596-3d76-471f-a61f-bd7afcddcfd2	Dealing with an extremely excellent branch, the application is good.	ريناد ادم	##########			2	ar	us		5	ar	deal extremely excellent branch application good	Positive	0	0	0
Google Play Store	63c9af9f-1d7d-4831-8c0d-153efe791258	The text says: "I receive text messages in English. How can I make them in Arabic? Please advise."	Wdalais Alfola	##########			0	ar	us		5	ar	text say receive text message english make arabic please advise	Neutral	1	1	0
Google Play Store	6f8a3c84-5631-486e-93a1-b1862a278fdb	Thank you.	عبدالحميد الغامدي	##########			0	ar	us		5	ar	thank	Positive	0	0	0
Google Play Store	2376a801-7bfe-4c3f-85f7-96b7dcf30269	This application has no benefit.	فهد فهد	##########			0	ar	us		1	ar	application benefit	Negative	1	0	0
Google Play Store	c330035f-ed6d-40e4-a445-341166e1fb40	"Very bad program and does not work properly, unfortunately I was unable to activate and use it at all. Therefore, my account with them has no value."	د. محمد الكريز	##########			1	ar	us		1	ar	bad program work properly unfortunately unable activate use therefore account value	Negative	1	1	0
Google Play Store	267a8186-1ac4-4f49-9ce6-95b582d1dada	This is a bad program and it has deceived me. It doesn't work, it's just a show-off. I regret dealing with the failed Aljazira Bank.	مروان العوفي	##########			0	ar	us		1	ar	bad program deceive doesnt work showoff regret deal fail aljazira bank	Negative	1	1	0
Google Play Store	bc2c88ec-ea8a-492b-b201-406d31f21225	Healthy	محمد عقيلي	##########			0	ar	us		5	ar	healthy	Positive	0	0	0
Google Play Store	ebe12fa8-53e0-45ee-a497-5d81a2966501	Thank you for your service ❤❤	Nasir Nasir	##########			1	ar	us		5	ar	thank service	Positive	0	0	0
Google Play Store	b34ec7c5-c379-4572-8ab5-a88fa8a84344	Very excellent and service is great, how are you doing?	نوره الشهري	##########			0	ar	us		5	ar	excellent service great	Positive	0	0	0
Google Play Store	903cde1a-43ec-4aaa-8e9c-2588e6cc0b7d	All transactions are smoothly, easily, and securely completed electronically. May you succeed, God willing, and move forward.	Abdallh Hassan	##########			5	ar	us		5	ar	transactions smoothly easily securely complete electronically may succeed god will move forward	Positive	1	0	0
Google Play Store	d5588142-3b79-421d-b037-2da606fcfaeb	The application is very bad; I couldn't cancel or modify the recipient's name for three days, despite visiting the main branch and being told to return to the program and file a complaint. Note that in some other banks, you can cancel or change the recipient's name within just a minute.	Abdulaziz Alhuthifi	##########			0	ar	us		1	ar	application bad couldnt cancel modify recipients name three days despite visit main branch tell return program file complaint note bank cancel change recipients name within minute	Negative	1	1	0
Google Play Store	8263c6cc-bdfe-4c4e-aa3b-00bddb9877ca	I couldn't open it, so I updated the card and updated the application.	ابو زياد	##########			0	ar	us		5	ar	couldnt open update card update application	Neutral	0	1	0
Google Play Store	54758b3f-a9a8-4809-8424-874f45120479	Excellent	Abd alsamia	##########			0	ar	us		5	ar	excellent	Positive	0	0	0
Google Play Store	09d6a232-3299-4db8-82c8-13138eaf2b74	"Bad application, I cannot register. I have tried many times and it gives me an expired residency."	Ramy Hendawy	##########			1	ar	us		1	ar	bad application register try many time give expire residency	Negative	1	1	0
Google Play Store	396a389c-2117-41f8-bd7f-9459b066bb8a	The worst application cannot be downloaded, why?	kris ko	##########			0	ar	us		1	ar	bad application download	Negative	1	1	0
Google Play Store	4f8bb4d7-60d9-455a-b291-8c5a0a9d2915	"Excellent and almost comprehensive application."	Mohammad Alawi AlFilfil	##########			1	ar	us		5	ar	excellent almost comprehensive application	Positive	0	0	0
Google Play Store	e5257ada-4782-489e-894f-66ec752a58c1	A very distinctive and easy-to-use application, thank you Al-Jazira Bank.	Moon Five	##########			0	ar	us		5	ar	distinctive easytouse application thank aljazira bank	Positive	0	0	0
Google Play Store	4fbbef57-e4ca-42c3-95c7-bca0b225f634	Best bank.	محمد العربي	##########			0	ar	us		5	ar	best bank	Positive	0	0	0
Google Play Store	e928006c-edd0-411b-9e34-ee5b31f584cd	Excellent and high quality services.	عبدالكريم حزام	##########			0	ar	us		5	ar	excellent high quality service	Positive	0	0	0
Google Play Store	48b7f7d2-c8ac-403d-994b-d82da162308e	The best bank and its transfers are excellent. Thank you, Al Jazeera team, and may you be blessed.	Abbdullah Ali	##########			0	ar	us		5	ar	best bank transfer excellent thank al jazeera team may bless	Positive	0	0	0
Google Play Store	68a0e848-37e0-4931-9ec6-28f024b60d80	Very good ❤️	Aymn99 Adm88	##########			0	ar	us		5	ar	good	Positive	0	0	0
Google Play Store	eb5c9c84-baef-40e7-b772-30e05270ea38	Very excellent.	الحوت مات	##########			0	ar	us		5	ar	excellent	Positive	0	0	0
Google Play Store	62dd7d05-55d7-4327-aec1-6dd53f59953a	The worst bank I have dealt with, extremely bad, its services are weak, they freeze your account and do not open it.	abod abadi	##########			0	ar	us		1	ar	bad bank deal extremely bad service weak freeze account open	Negative	1	1	1
Google Play Store	12d14a28-e8f3-4c31-a2a9-95064c125ac0	Flexible and easy.	عبدالله بن حلزاء	##########			0	ar	us		4	ar	flexible easy	Positive	0	0	0
Google Play Store	9deee927-61dc-431a-a591-1221c9890baa	Excellent and amazing	‪Mohmmed Ahmed (‫الارحبي‬‎)‬‏	##########			0	ar	us		5	ar	excellent amaze	Positive	0	0	0
Google Play Store	6c68bee2-1eed-4764-92d8-1353453b89e3	I wish you had left the app as it was. You updated it and ruined it. I entered my username but the app couldn't retrieve it. This is what they are telling us, may you be safe from your love for us.	نيزك	##########			2	ar	us		1	ar	wish leave app update ruin enter username app couldnt retrieve tell us may safe love us	Negative	0	1	0
Google Play Store	9e55c66e-0001-48ec-9d38-8899e2ed05cb	The service at the branches is very good, but the application is very bad and frustrating. It takes up space on the phone for no reason, hoping that it will work and activate, but every time I enter the data for new user registration, there is no call or message despite them updating the data regularly from their branch. We hope that they do what is necessary so that we can use the online service…	Fadi Ahmad	##########			17	ar	us		1	ar	service branch good application bad frustrate take space phone reason hop work activate every time enter data new user registration call message despite update data regularly branch hope necessary use online service avoid go branch even though respectful	Negative	1	1	1
Google Play Store	2cd78d88-5434-4e44-ae62-adf0acbc9b2a	Very excellent.	احمد ماهل	##########			0	ar	us		5	ar	excellent	Positive	0	0	0
Google Play Store	7fee4817-00f0-4bb1-9624-dce621776a74	My experience with technology channels is excellent, but unfortunately there is no branch in Abha, although it is one of the oldest banks.	محمد ابوالفضايل	##########			1	ar	us		5	ar	experience technology channel excellent unfortunately branch abha although one old bank	Negative	1	0	0
Google Play Store	342a178b-f752-4821-847d-a5240be297cb	Very excellent	سلطان ابوزايد	##########			0	ar	us		5	ar	excellent	Positive	0	0	0
Google Play Store	0e12c0f3-60d9-4ce2-8ef8-402001a61be4	The best bank application I have tried.	Abdossalam Alsomaily	##########			0	ar	us		5	ar	best bank application try	Positive	0	0	0
Google Play Store	311aac0b-38b4-4985-9853-5a55ea6cc3ee	Beautiful.	يوسف ادم	##########			0	ar	us		5	ar	beautiful	Positive	0	0	0
Google Play Store	c6ca8175-54ec-487f-97bd-d8acebff57cb	Excellent, especially the branch in Jeddah, Samer district. I thank Mr. Abdulaziz Al Zahrani, may he be blessed.	خالد قاضي	##########			0	ar	us		5	ar	excellent especially branch jeddah same district thank mr abdulaziz al zahrani may bless	Positive	0	0	0
Google Play Store	981e300c-8090-40fc-bf45-bd0442c02af4	Excellent very much	اباعبيده محمد	##########			0	ar	us		5	ar	excellent much	Positive	0	0	0
Google Play Store	9e117301-2e90-4b24-acbf-d6dfb867f250	Amazing	غانم محمد عبدربه	##########			0	ar	us		5	ar	amaze	Positive	0	0	0
Google Play Store	a83b42e6-28aa-4924-b572-fef6c514b504	Wonderful and easy	ماجد الحكمي	##########			0	ar	us		5	ar	wonderful easy	Positive	0	0	0
Google Play Store	dc7a7025-4acd-4d5c-af19-dd22b56b016c	Unfortunately, it was a mistake of a lifetime that I opened an account in this lousy bank. On Sunday, God willing, I will close my account.	Memo Alshehri	##########			0	ar	us		1	ar	unfortunately mistake lifetime open account lousy bank sunday god will close account	Negative	1	0	0
Google Play Store	fb1afc57-b285-41b6-be3f-f0a523e16a7e	Why don't you add an option to display banking card information within the application?	أيمن الشرقي	##########			0	ar	us		3	ar	dont add option display bank card information within application	Neutral	0	1	0
Google Play Store	b7bb35af-1125-4b14-8eb7-96fab9ce3e65	Thank you, Banque Al-Hayzirah, excellent application.	Mohammed Al Yami	##########			1	ar	us		5	ar	thank banque alhayzirah excellent application	Positive	0	0	0
Google Play Store	1a301b6f-cdc6-4428-929f-f17d19bf304f	Very, very, very, very, very bad. It is just an application taking up space.	Omer Mohammed	##########			0	ar	us		1	ar	bad application take space	Negative	1	0	1
Google Play Store	d5ccd403-a172-455e-aca0-eb7b4a8545ba	Under experimentation	Mlak	2022-09-06 08:37:00			0	ar	us		1	ar	experimentation	Neutral	0	0	0
Google Play Store	9d8c9a58-b5e9-498f-8556-f3aed3971d8c	"I cannot register in the instant service, it says there is a technical problem."	جهاد الهردي	##########			0	ar	us		2	ar	register instant service say technical problem	Negative	0	1	0
Google Play Store	ad96cff6-1a11-4eff-826a-fc9f289d3094	After the update, the application is unsuccessful when trying to reset the password; it is giving an error in the residency number even though it is correct. It does not deserve half a star.	نكبة مغترب	##########			1	ar	us		1	ar	update application unsuccessful try reset password give error residency number even though correct deserve half star	Negative	1	1	0
Google Play Store	807d7a1a-0c67-47d7-9ec1-bc74037f699a	Excellent very much	Dankeb Dankeb	##########			0	ar	us		5	ar	excellent much	Positive	0	0	0
Google Play Store	fbe95d56-cbea-4266-9a6a-2826e1c023fd	Good but when I changed my device, the fingerprint login stopped working and now I can only log in through SMS messages. I don't know why.	عدنان اليعري	##########	عزيزي العميل، توجه الي قائمة الخدمات الذاتية ثم اختر ادارة البصمة، قم بمسح جميع الاجهزة. توجه الى صفحة تسجيل الدخول مرة اخرى وتاكد من ادخال اسم المستخدم و كلمة المرور ثم اختر خاصية البصمة. في حال عدم حل المشكلة الرجاء الاتصال بالجزيرة فون ليتم مساعدتك. شكراً لاستخدامك الجزيرة سمارت	##########	0	ar	us		3	ar	good change device fingerprint login stop work log sms message dont know	Negative	1	1	0
Google Play Store	d0191b10-c1a2-4762-a32c-2e157c586ab5	Very good and easy.	magdy Makawe	##########			0	ar	us		5	ar	good easy	Positive	0	0	0
Google Play Store	9f9b624b-d9ad-4fc4-83c3-e1af1ea9e6fb	done	بن مرعي	##########			0	ar	us		5	ar	do	Positive	0	1	0
Google Play Store	6102bfa7-40d8-4974-8cf2-efb7259d9d15	Development is needed	دام عزك	##########			0	ar	us		2	ar	development need	Positive	1	0	0
Google Play Store	d9347593-24a8-40af-844d-afa8eb70b582	The best, simplest, and very easy-to-use banking application ever.	Mirza Duhaim	##########			0	ar	us		5	ar	best simple easytouse bank application ever	Positive	0	0	0
Google Play Store	6ba788cc-d92a-4c2e-8486-1712a4cad8a5	Excellent very very much	مبروك الحميدي	##########			0	ar	us		5	ar	excellent much	Positive	0	0	0
Google Play Store	eafefdaa-1c7d-4c38-aa5f-9d893ac5a9a2	The application does not open the account when I open the account with the same user on the web page, everything is fine and I can use the services. However, in the application, it gives me an error message in red and I cannot benefit from it.	فارس محمد	##########			0	ar	us		1	ar	application open account open account user web page everything fine use service however application give error message red benefit	Negative	0	1	0
Google Play Store	3873163a-f1ee-4579-bb13-cd8cc6053617	It is very bad when I download the application on my phone and it tells me that there are no options available at this time. I don't know what the reason is! Even though I have tried more than twenty times! Anyone who has a solution to the problem, please let me know and may Allah reward them.	نشوان نشوان	##########			15	ar	us		1	ar	bad download application phone tell options available time dont know reason even though try twenty time anyone solution problem please let know may allah reward	Negative	1	1	0
Google Play Store	5af4cf60-82fb-43e8-b180-027258813e25	Excellent	ابراهيم حكمي	##########			0	ar	us		5	ar	excellent	Positive	0	0	0
Google Play Store	ab606226-84b8-4e67-8315-180c84fd2db5	Unfortunately, after the latest update, it has become very bad.	Hamid amer	##########			0	ar	us		1	ar	unfortunately late update become bad	Negative	1	0	0
Google Play Store	f7b88d47-afa3-4127-b773-926f415cffb3	Good and easy, but I don't know how to download the application on the desktop.	fatim a	##########			2	ar	us		5	ar	good easy dont know download application desktop	Neutral	0	0	0
Google Play Store	efb3616a-fac5-4759-ad34-f3dc8fcffb60	The worst bank I have ever experienced in my life. They are The worstand their customer service is worse than garbage itself. The bank management is a group of donkeys.	ماجد الشمري	##########			0	ar	us		1	ar	bad bank ever experience life worstand customer service bad garbage bank management group donkeys	Negative	1	0	0
Google Play Store	a974db80-e543-4df1-afe9-e311fba51eb7	Great application	Commander Bradley	##########			0	ar	us		5	ar	great application	Positive	0	0	0
Google Play Store	551c7c0a-6f3c-45f2-95e5-44baa4cd001d	The program is not working because there is a problem.	H Al	2022-08-07 07:28:00			0	ar	us		1	ar	program work problem	Negative	0	1	0
Google Play Store	e75f2d1d-9eb5-46cc-ab4f-73eb70fb9461	After the latest update, the application no longer opens for me. Please solve the problem. An error in the system is appearing.	ابو امير	##########			4	ar	us		3	ar	late update application long open please solve problem error system appear	Negative	0	1	0
Google Play Store	1b60e528-9d49-4b5b-9b5f-555b2150951e	Al Jazeera Bank 100%	برق رعد صاعقة طيارة حربية مدرعة مرعبة 100%	2022-08-04 04:39:00			0	ar	us		5	ar	al jazeera bank	Neutral	0	0	0
Google Play Store	2fc49e1f-b3e2-48ad-ac06-545c1338f730	The truth is something luxurious beyond compare.	aboaws al thunayyan	##########			0	ar	us		5	ar	truth something luxurious beyond compare	Positive	1	0	0
Google Play Store	0b75a1c3-d43b-404f-a8d8-49ceec20ad5a	Beautiful	ghamdibm M	##########			0	ar	us		5	ar	beautiful	Positive	0	0	0
Google Play Store	3e7c8056-5bad-4389-bcb6-2a8b061adf33	There are so many updates 😭	مشعل اللهيبي	##########			0	ar	us		5	ar	many update	Positive	1	0	0
Google Play Store	8a8eed0e-4ffb-44e3-a9fe-b64360f5213d	A very excellent application	بشير احمد	##########			0	ar	us		5	ar	excellent application	Positive	0	0	0
Google Play Store	52f0d44a-0fb2-41b8-ac2d-4306de112434	Honestly, the application has become The worstafter they made a new update for it. As far as I know, updates are usually supposed to be better than the previous version, but this one became worse. For three days, I have been trying to log into my account, but it keeps telling me that the password and username are incorrect, even though I am certain they are correct. I have changed the password mu…	WMA A	##########			13	ar	us		5	ar	honestly application become worstafter make new update far know update usually suppose good previous version one become bad three days try log account keep tell password username incorrect even though certain correct change password multiple time still doesnt work dont know problem	Negative	1	1	0
Google Play Store	8299b7c0-f17f-4d6f-9717-850db80047d7	Disgusting rubbish application.	Ramy Whdan	##########			0	ar	us		1	ar	disgust rubbish application	Negative	1	0	0
Google Play Store	6974d43e-0f34-4443-9977-eece9c479d93	Excellent very much	خالد جمال	##########			0	ar	us		5	ar	excellent much	Positive	0	0	0
Google Play Store	538412c9-3e96-44f6-94f7-c4a14cb07eeb	Great, but adding the feature of controlling the mood points remains.	ALI SAHARI	##########	عزيزي العميل نقدر تعاونك و إهتمامك و سيتم رفع ملاحظتك للإدارة المختصة وشكراً لك.	2020-08-09 08:58:00	2	ar	us		5	ar	great add feature control mood point remain	Positive	1	0	0
Google Play Store	056de7f8-d490-4aa5-9580-2cba45907836	The best bank ever.	LSTR	##########			0	ar	us		5	ar	best bank ever	Positive	0	0	0
Google Play Store	ac0a6a1c-6618-43d3-a9f0-46f383c71e43	What happened to you? The code will arrive in 5 hours. Our affairs were disrupted because of your bad application.	ابراهيم الورافي	##########			0	ar	us		1	ar	happen code arrive hours affairs disrupt bad application	Negative	1	1	0
Google Play Store	d10dcb8a-6640-4049-9c4f-2b96c4970de9	The additional account names have been deleted.	غدير عمر	##########			0	ar	us		1	ar	additional account name delete	Neutral	0	1	0
Google Play Store	6df74e9d-e437-48f6-a1c0-dcc6a41b9c15	Beautiful	عبد الرحمن يوسف عبد الرحمن الحسين	##########			0	ar	us		1	ar	beautiful	Positive	0	0	0
Google Play Store	6eff6db9-774c-4ef7-ac26-abc74adb8be6	The activation number is not working.	ABDUALSLAM AREF	##########			0	ar	us		1	ar	activation number work	Negative	0	1	0
Google Play Store	ffe34eca-a6e8-4d93-8cf0-cf4f620e8659	Very good deal/interaction.	Abdullah Mahmoud	2022-07-09 07:58:00			0	ar	us		2	ar	good dealinteraction	Positive	0	0	0
Google Play Store	8538c673-d000-478b-af9c-bc098841b631	Bad and worse than all the banks.	abdullah saleh	##########			0	ar	us		1	ar	bad bad bank	Negative	1	0	0
Google Play Store	365055f0-2c07-42be-8b8c-f42a01dc4989	Very beautiful	الحمدلله على كل حال ربي اغفرلي ورحمني وانصرني	##########			0	ar	us		5	ar	beautiful	Positive	0	0	0
Google Play Store	d1d67fe3-37ff-44c6-b3ce-08c96bad426e	It is excellent. I highly recommend everyone to use it. It is very nice to use.	Mohammed Alyass	##########			0	ar	us		5	ar	excellent highly recommend everyone use nice use	Positive	0	0	0
Google Play Store	e32a344a-50c5-409c-91a8-f962cbedc64b	International transfer fees have become high for Sudan, increasing from 6 riyals to 28. It is reasonable, but we request consideration of the matter.	ENG ABOBAKER	##########			1	ar	us		1	ar	international transfer fee become high sudan increase riyals reasonable request consideration matter	Neutral	1	0	0
Google Play Store	5a127842-ba86-46ab-b3e3-1a9bf39e29f1	Easy and excellent	Ahmed Ahmedsu	##########			0	ar	us		5	ar	easy excellent	Positive	0	0	0
Google Play Store	cd45a60a-8d31-4df0-ab48-082805c1df20	Excellent.	خالد الصديق	2022-07-02 05:06:00			0	ar	us		5	ar	excellent	Positive	0	0	0
Google Play Store	6d455fb6-8cb7-437c-91f4-8109231403d3	When I try to generate a statement of account, the program crashes and says "unable to open the PDF file."	NOOD NO	##########			0	ar	us		1	ar	try generate statement account program crash say unable open pdf file	Negative	0	1	1
Google Play Store	d880b9b0-55ad-4283-be75-5a7d6c9cd363	The update is very very bad, it does not provide any services.	Yassine Harzi	##########			0	ar	us		1	ar	update bad provide service	Negative	1	0	0
Google Play Store	0c40fd07-ba70-406d-8e60-08ff5b23cdac	Excellent very much.	mohammed madkhali	##########			0	ar	us		5	ar	excellent much	Positive	0	0	0
Google Play Store	54e869ae-90c9-4832-974d-0820cea024af	Very bad and the worst bank.	محمود يوسف	##########			0	ar	us		1	ar	bad bad bank	Negative	1	0	0
Google Play Store	5e9d1f44-b555-464f-b647-1b974913dfbd	Bad application and rarely works, unfortunately.	ابتسام جان	##########			0	ar	us		1	ar	bad application rarely work unfortunately	Negative	1	1	0
Google Play Store	f2eb5b6d-f9e1-47cd-97cc-f555d593c8b3	Find a solution for the program that does not send the code, does not convert, and does not settle. Meaning, it is stuck and I told him.	jo jo	##########			1	ar	us		1	ar	find solution program send code convert settle mean stick tell	Negative	0	0	1
Google Play Store	eb230224-4bd7-439f-9dcd-30e93c595219	Rubbish, rubbish, rubbish. It's a pity for the star.	ابو حنين محمد صابر صابر امين	##########			0	ar	us		1	ar	rubbish rubbish rubbish pity star	Negative	1	0	0
Google Play Store	637bceae-c405-4721-a0ca-a46ff560995e	It is done.	عبدالله قسم	##########			0	ar	us		5	ar	do	Neutral	0	1	0
Google Play Store	40b12645-60dc-41ef-83dd-942f603d01f4	Good	hani noori	##########			0	ar	us		5	ar	good	Positive	0	0	0
Google Play Store	0996f39d-a947-4f62-9b96-1a2a13fee9a9	The best bank ever.	Safwan Mohamed	##########			0	ar	us		5	ar	best bank ever	Positive	0	0	0
Google Play Store	e0a51773-47f1-45f0-8ada-a413b88671be	The application has become very bad and unbearable. When trying to make any transaction, it does not send a code, and withdrawal messages do not arrive. I have filed a complaint, but nothing has changed.	Shooshoo Kh	##########			19	ar	us		1	ar	application become bad unbearable try make transaction send code withdrawal message arrive file complaint nothing change	Negative	1	1	0
Google Play Store	1bcb4afd-124b-4e81-b133-ffb3666c2093	Thank you.	Mansour Ibrahim	##########			0	ar	us		5	ar	thank	Positive	0	0	0
Google Play Store	7ac88fab-4055-42ea-812b-0264e8a53236	It is done.	مجدي العفاض	##########			0	ar	us		5	ar	do	Neutral	0	1	0
Google Play Store	19d7d03c-cf59-4699-9e13-55bfcb4be4f1	Special service	Salah Alyame	##########			0	ar	us		5	ar	special service	Positive	0	1	0
Google Play Store	231985b7-a398-47ad-a5e6-e18bfa8b5e2d	I fabricated a false front to the update, there is no need for following the system instructions. Only follow the instructions.	Thamer Aljafer	##########			6	ar	us		2	ar	fabricate false front update need follow system instructions follow instructions	Negative	1	1	0
Google Play Store	2f742f51-486b-46a4-887c-f6b5faded8a6	The application has a problem when converting and requesting a delay code in sending the code.	alqadery 2030	2022-06-09 09:47:00			1	ar	us		1	ar	application problem convert request delay code send code	Negative	0	0	1
Google Play Store	b25a9218-56ce-4870-b54b-4cb307565b3a	Excellent very good.	Arshani العرشاني yusf	##########			0	ar	us		5	ar	excellent good	Positive	0	0	0
Google Play Store	52684864-64fb-4057-8629-0749af8759f0	The update is not being done.. and it is delayed but it is working ❗	خالد التميمي	##########			1	ar	us		1	ar	update do delay work	Neutral	0	1	1
Google Play Store	1c718f08-229a-4f72-b356-4893f5f0b3ed	The best banking application I have used is very simple and easy to use. Thank you Al-Jazeera for this excellent application.	ڪآريڪآتير	##########			1	ar	us		5	ar	best bank application use simple easy use thank aljazeera excellent application	Positive	0	0	0
Google Play Store	5a85df1a-9dcc-4fab-8bf0-c1eecc09c53f	Excellent very much.	علي دهل	##########			0	ar	us		4	ar	excellent much	Positive	0	0	0
Google Play Store	58267785-6280-496a-b5f9-55b7c583062e	Waiting for activation	Mohammad Kangole	##########			0	ar	us		5	ar	wait activation	Neutral	0	0	1
Google Play Store	1dc8a0d9-9ef5-406b-addf-540610c13e14	The customer service experience was not good. There was a transfer made from one bank to another, and both banks claim to have processed the transaction properly. For the person who complained, is the transfer lost?	مجاهد المعمري	##########			1	ar	us		1	ar	customer service experience good transfer make one bank another bank claim process transaction properly person complain transfer lose	Negative	1	0	0
Google Play Store	247ed188-4227-4b3e-bf46-269780a77df6	Wonderful	همس الشهري	##########			0	ar	us		5	ar	wonderful	Positive	0	0	0
Google Play Store	226a63bf-9790-472c-9659-adbd034d3e3d	Good	Ãbu Bãkŗ M.Ğ Ẽltayeb	##########			0	ar	us		4	ar	good	Positive	0	0	0
Google Play Store	7d22107e-52e6-4093-9cbb-2327fa4d90b6	My experience with international transfers via Fawry is amazing.	Mustafa Abdulrahman	##########			0	ar	us		5	ar	experience international transfer via fawry amaze	Positive	0	1	0
Google Play Store	2b76d063-cfce-41b6-a0e8-fdc30eb5dee7	Good.	ازرق بلدي	##########			0	ar	us		5	ar	good	Positive	0	0	0
Google Play Store	08144111-566f-45d0-b655-9bed808bae1e	Done	Othman Fal	##########			0	ar	us		5	ar	do	Positive	0	1	0
Google Play Store	9cce3f3d-53ce-446b-ba8b-afa1ec750e07	Better than the first big difference, I hope to continue developing it and that it truly becomes a digital service that eliminates the need to visit the bank completely.	Nawaf ALNEFAIE	##########			1	ar	us		4	ar	good first big difference hope continue develop truly become digital service eliminate need visit bank completely	Positive	1	0	0
Google Play Store	aaf562b9-7a64-4e46-b00e-e0d0675a1b01	Excellent	Mahamm Dd	##########			0	ar	us		5	ar	excellent	Positive	0	0	0
Google Play Store	7f728f29-8d7b-4c13-a264-f4c67e9e32ed	"An excellent application deserving a million stars. I thank those in charge of it and thank you, Al-Jazira Bank."	صدام حسن	##########			0	ar	us		5	ar	excellent application deserve million star thank charge thank aljazira bank	Positive	0	0	0
Google Play Store	52c3f5cd-6cd0-4cc0-a5f6-b96a1a5ce633	The best	ابو عبد الله	##########			0	ar	us		5	ar	best	Positive	0	0	0
Google Play Store	4d12afbf-b2af-4c4b-9de6-4080aa96f999	An excellent application.	saleh almajed	2022-05-07 09:05:00			0	ar	us		5	ar	excellent application	Positive	0	0	0
Google Play Store	ba9c36e0-629a-4c0d-8abc-a97403def2ea	The application is very excellent in solving the problem of not accepting transfers to local banks.	محمد الغيثي	##########			0	ar	us		5	ar	application excellent solve problem accept transfer local bank	Positive	1	1	0
Google Play Store	9febb743-1799-4492-bcab-47904829d59f	The verification code after the latest update arrives very late after sending multiple codes, which causes a great inconvenience to the customer.	خالد الدوسي	##########			23	ar	us		1	ar	verification code late update arrive late send multiple cod cause great inconvenience customer	Negative	1	1	0
Google Play Store	12e07d38-9636-46eb-a060-2397a23f98df	More than wonderful	FOX 2626 ALHADI	2022-05-01 09:59:00			0	ar	us		4	ar	wonderful	Positive	0	0	0
Google Play Store	346fe29a-2cb0-4f5a-a747-19a433b825be	How do I register an account? Can you please assist me?	عبدالرحيم محمد	##########			0	ar	us		1	ar	register account please assist	Neutral	0	1	0
Google Play Store	26973aab-3a93-4895-abcd-28223c38a5ec	After the update, the application does not open for me, and I cannot even set a new password. It tells me that the error is from the owner's website. So, what is the solution please?	Memo Barak	##########			3	ar	us		5	ar	update application open even set new password tell error owners website solution please	Negative	0	1	0
Google Play Store	f0362a2b-e88c-4c66-976c-6af96140e0b5	Excellent	محمد حسن محمد	##########			0	ar	us		5	ar	excellent	Positive	0	0	0
Google Play Store	94b0f708-7097-47a5-bbff-c3ead2c4abd0	I am very disappointed and disgusted with a bank that you can imagine in your entire life. If I were to describe to you the level of poor customer service and transfer or deposit services, I honestly cannot.	FOR YOU	##########			0	ar	us		1	ar	disappoint disgust bank imagine entire life describe level poor customer service transfer deposit service honestly	Negative	1	0	0
Google Play Store	23489848-f225-4e6d-9e92-9a2add3ca4c5	Very excellent	محمد المسفر	##########			0	ar	us		5	ar	excellent	Positive	0	0	0
Google Play Store	16ec1357-5a24-4556-8e96-7724663abbdb	Without the required	مستخدم Google	##########			1	ar	us		2	ar	without require	Neutral	1	0	1
Google Play Store	e781888c-8c34-44c6-a492-86d2ff81ad1d	Unfortunately, there are a lot of comments, I'd rather go to the bank than use the application.	١ ٢	##########			0	ar	us		1	ar	unfortunately lot comment id rather go bank use application	Negative	1	0	0
Google Play Store	9dd3c3ab-618c-4812-807b-a9c3bbfbae20	Very beautiful	ناظم موسي	##########			0	ar	us		5	ar	beautiful	Positive	0	0	0
Google Play Store	ccb69e04-cccd-452e-98de-94a753ca8b9c	Excellent very much.	Awadalaleem mohammed ahmad	##########			0	ar	us		5	ar	excellent much	Positive	0	0	0
Google Play Store	e43b9998-2beb-4583-9110-d77c44309b52	Good.	Hafedh Abdoh	##########			0	ar	us		5	ar	good	Positive	0	0	0
Google Play Store	ee09e938-571a-4054-897a-60b940b5943b	Excellent and convenient service.	احمد	##########			0	ar	us		5	ar	excellent convenient service	Positive	0	0	0
Google Play Store	5274633b-7c37-49de-9e0d-eb7fb478dacc	Good, it is useful during times of crises.	Hesham Smsm	##########			0	ar	us		5	ar	good useful time crises	Positive	0	0	0
Google Play Store	2b8e25bc-fbfa-4c70-a741-4ae9734362f9	Beautiful and excellent.	zahi wahan	##########			0	ar	us		5	ar	beautiful excellent	Positive	0	0	0
Google Play Store	b230c50c-7a7f-4b0e-badb-01ed7f0ae4f5	"Excellent" at the moment.	Lion's heart	##########			2	ar	us		5	ar	excellent moment	Positive	0	0	0
Google Play Store	e2123fa6-4d7d-467f-b231-797945b35c78	Slowly	ابو نشوان	##########			0	ar	us		1	ar	slowly	Neutral	0	0	1
Google Play Store	f21d8fa5-d5d7-48ef-8fb5-38bfb8580d18	An amazing application with many great services.	انور النقيب	##########			0	ar	us		5	ar	amaze application many great service	Positive	0	0	0
Google Play Store	df0daef1-506e-42a1-bb4b-fc30b3787895	The application is still slow.	Mustafa Alnazeer	##########			0	ar	us		5	ar	application still slow	Negative	0	0	1
Google Play Store	2e9569c6-a4a1-4d7f-8705-cbcb65d207e6	Good.	abdelrazeg Dawood	##########			0	ar	us		5	ar	good	Positive	0	0	0
Google Play Store	321be3fa-7511-48be-a136-5b8401c11974	The application logo has become the same as the green Android logo... It looks ugly... Even after reloading the application, there is no logo for the application on my Galaxy S7 Edge... as it was previously!!	فاتن سمندر	##########			0	ar	us		3	ar	application logo become green android logo look ugly even reload application logo application galaxy edge previously	Negative	1	0	0
Google Play Store	5c865873-ec9d-4a22-b73e-50a0bf413f3f	There is only a problem with updating the application.	Atef Hadad	##########			0	ar	us		3	ar	problem update application	Negative	0	1	0
Google Play Store	6767a879-83c9-4e28-84ec-a6419c53198d	awesomeness	رحال رحال رحال	##########			0	ar	us		5	ar	awesomeness	Positive	0	0	0
Google Play Store	ec582cfa-c639-4de0-836e-d7996f3c1a9d	Well done.	عقاب المالكي	##########			0	ar	us		4	ar	well do	Positive	0	0	0
Google Play Store	4cc89e99-7df1-4ac0-a533-bcc55157e89d	Thank you, Al-Jazira Bank. I wish that banks with more customers than Al-Jazira have programs like these programs.	ahmed positive	##########			2	ar	us		3	ar	thank aljazira bank wish bank customers aljazira program like program	Positive	0	0	0
Google Play Store	77e67b6f-8dc3-4a94-9d9b-35b2c8b25a76	Excellent	النور الكردي	##########			0	ar	us		5	ar	excellent	Positive	0	0	0
Google Play Store	d04bd7ba-2f6f-4893-be5e-0e8d9b4ebefc	The download is not happening .. What is the problem? May Allah bless you.	ابو مريم	##########			0	ar	us		5	ar	download happen problem may allah bless	Negative	0	1	0
Google Play Store	c75f86a4-fd62-4095-a0e9-026ce0eb0d38	Slow application. We hope for its development and acceleration.	بوبكر بوصديق	##########			0	ar	us		1	ar	slow application hope development acceleration	Positive	0	0	1
Google Play Store	73271113-d66c-4bdc-b5b8-8e761e675009	The application does not open and is very exhausting.	تامر صادق	##########			1	ar	us		1	ar	application open exhaust	Negative	0	1	0
Google Play Store	78fc7742-1a32-41f2-95c0-e47f7be62a43	Under trial/experiment	محمد آل هادي	##########			0	ar	us		3	ar	trialexperiment	Neutral	1	0	0
Google Play Store	7e834d7a-708a-46c9-91c9-5e467a0b07c3	Good	Abdulrhman Mohmad	##########			0	ar	us		5	ar	good	Positive	0	0	0
Google Play Store	0cb80ddc-bdee-4adf-884c-e1b3b348faa4	Good.	محمد القدرني	##########			0	ar	us		5	ar	good	Positive	0	0	0
Google Play Store	c4f9ef07-8ac3-4f8c-9708-a5d899540ee2	Good	ALI ALSHAWAREB	##########			0	ar	us		5	ar	good	Positive	0	0	0
Google Play Store	93795d79-4dc3-4079-a043-8dc6f5ab98d3	Excellent.	MOHAMMAD SULAIMAN	2022-04-08 03:51:00			0	ar	us		5	ar	excellent	Positive	0	0	0
Google Play Store	d6048dcb-c635-4486-b2e8-8bef5ecf89db	Excellent application, honestly. I can easily send to Yemen. Thank you 🌷	AZ افتخر بعروبتي	##########			1	ar	us		5	ar	excellent application honestly easily send yemen thank	Positive	0	0	0
Google Play Store	369a2044-53f1-4c0d-bd26-45a5e33a4cc2	Wonderful application.	سنعوسي	##########			0	ar	us		5	ar	wonderful application	Positive	0	0	0
Google Play Store	abb97b58-2e7a-43f9-9b5f-2f0a8ba1b02d	Excellent, good luck!	wad balh	##########			0	ar	us		5	ar	excellent good luck	Positive	0	0	0
Google Play Store	b84bdcde-3f24-42f2-b0da-aaed4e629181	It has been several days that the issue is still unresolved and all my services depend on it. Please solve the problem as soon as possible. I have also tried deleting it and reinstalling it, but it didn't help. Please resolve the issue as quickly as possible.	عمر عبدالرحمن	2022-04-07 09:42:00			0	ar	us		1	ar	several days issue still unresolved service depend please solve problem soon possible also try delete reinstall didnt help please resolve issue quickly possible	Negative	0	1	0
Google Play Store	daeea9e7-405c-462d-ba36-460a662ae956	Do not uninstall updates, you deleted my account.	عابر الحربي	2022-04-07 00:59:00			0	ar	us		1	ar	uninstall update delete account	Negative	0	1	0
Google Play Store	84923a1f-d2b6-49dc-a982-802ff92e43f8	The application is hanging and asking for an update, but nothing is happening.	bassam aldubiban	2022-04-06 00:25:00			1	ar	us		1	ar	application hang ask update nothing happen	Negative	0	1	1
Google Play Store	190236a8-0b86-4982-87a6-3d08e95dc53f	Soon, the new year will begin and I want to spend it with you.	DrMajdi Mekaina	##########			0	ar	us		1	ar	soon new year begin want spend	Positive	1	0	0
Google Play Store	cb636182-654d-4ae3-8c3f-ad60fcdd3a5a	nice	جيزو الجعفري	##########			0	ar	us		5	ar	nice	Positive	0	0	0
Google Play Store	e512aabb-ab44-47f8-821f-5207e4b86272	Good.	S. H	##########			0	ar	us		5	ar	good	Positive	0	0	0
Google Play Store	8e21ced7-3333-4009-a08e-5c9c14095dbd	There have been frequent disconnections with the stock index indicator. I hope the problem can be fixed within an hour. I need to refer to the evidence twice or three times.	خبير	##########			0	ar	us		2	ar	frequent disconnections stock index indicator hope problem fix within hour need refer evidence twice three time	Negative	0	1	0
Google Play Store	d9cf833a-5099-4098-b616-d4b8133461a2	In case of slow, very very very slow updating.	Abdo Abdo	##########			1	ar	us		2	ar	case slow slow update	Negative	0	0	1
Google Play Store	aed72d33-8f56-4fb1-b658-b11e0b6c0c1a	The latest update is very bad and does not allow converting to local banks or querying transaction history. Before the update, it was excellent.	Abdullah Eltaj	2022-04-05 08:39:00			1	ar	us		1	ar	late update bad allow convert local bank query transaction history update excellent	Negative	1	1	0
Google Play Store	7b400442-ff05-4cef-8e42-5e2e1ce7cc0c	The application is very beautiful, comfortable, and fast to open.	سلطان الرقيعي	2022-04-05 07:03:00			1	ar	us		5	ar	application beautiful comfortable fast open	Positive	0	0	0
Google Play Store	c97f2a7e-59cb-4a5b-b7aa-065edb8245c1	Very good	Ibrahim Abdulbagi	##########			0	ar	us		5	ar	good	Positive	0	0	0
Google Play Store	e6f474cf-9614-4ed2-adea-f9d8fabb76ad	Beautiful	Saaaadsh37@gamil.com asdf1234	##########			0	ar	us		5	ar	beautiful	Positive	0	0	0
Google Play Store	d8316654-0cc7-432e-be9a-252185860370	Excellent application.	ali suliman	##########			0	ar	us		5	ar	excellent application	Positive	0	0	0
Google Play Store	6c196038-c135-4108-b680-d184e5977f42	Beautiful and efficient for effort and time.	Najeeb Issa	##########			1	ar	us		5	ar	beautiful efficient effort time	Positive	0	0	0
Google Play Store	cb5f1699-71b0-4625-8344-b1daa1114ef6	Very bad, it asks for an update and the update has not been done.	محمد أبراهيم	##########			1	ar	us		1	ar	bad ask update update do	Negative	1	0	0
Google Play Store	169cb206-1f22-4851-b073-55c90f586a09	The application is constantly evolving.	M F	2022-04-04 09:51:00	عزيزي العميل نشكر ثقتكم و نسعى دائماً أن نكون عند حسن ظنكم و أبشر بعزّك. تفضل بالإتصال على الرقم 920006666 الخاص بعملاء بنك الجزيرة لتتم خدمتك وشكراً لك.	##########	0	ar	us		5	ar	application constantly evolve	Neutral	0	0	0
Google Play Store	38740eee-2402-44b1-aa7a-64ac18a83b30	Distinguished in appearance and quick in execution.	Abu Alhana	2022-04-04 07:40:00			0	ar	us		5	ar	distinguish appearance quick execution	Neutral	1	0	0
Google Play Store	81ccd755-f241-4996-b9a6-66fe8b754408	Very good	ابو احمد محمد	2022-04-04 00:57:00			0	ar	us		5	ar	good	Positive	0	0	0
Google Play Store	30c0da5d-0133-4e0d-9395-d71eee45b41d	1	محمد الحارثي	##########			0	ar	us		5	ar		Positive	0	0	0
Google Play Store	9313c218-510e-475c-b298-26df1b113fbc	Very good, excellent.	بلال المخلافي	##########			0	ar	us		5	ar	good excellent	Positive	0	0	0
Google Play Store	3fdcb689-abd3-4952-aa92-6aba0b9f7466	Excellent and safe experience.	Mohammed Albuainain	2022-04-03 07:50:00			0	ar	us		5	ar	excellent safe experience	Positive	0	0	0
Google Play Store	52bb8c6e-0c16-451d-abde-fcb1f6d9de4c	Excellent in everything .. excellent services .... excellent call center ... may God bless you.	مصعب عبده	2022-04-03 00:05:00			1	ar	us		5	ar	excellent everything excellent service excellent call center may god bless	Positive	0	0	0
Google Play Store	0050fa41-a393-4fab-8291-ad08a828a7bf	Excellent	Salah ALhkami	##########			0	ar	us		5	ar	excellent	Positive	0	0	0
Google Play Store	afc3dc50-3702-4ff1-8721-99f42068215c	Very wonderful	Waleed Ahmed	##########			0	ar	us		5	ar	wonderful	Positive	0	0	0
Google Play Store	d18f2e44-f919-4587-8323-be3638ce29ab	May Allah reward you with goodness... for your efforts in development.👍	عادل عبد الهادي على على	##########			0	ar	us		5	ar	may allah reward goodness efforts development	Positive	1	0	0
Google Play Store	284add59-76cd-4e3c-8126-870ef40b5692	Very good.	Saapتسلم 2020	##########			0	ar	us		5	ar	good	Positive	0	0	0
Google Play Store	92232ac0-0104-4d30-83ee-6e75fa13c6c7	Thank you for the excellent program, it saved us time, effort, and money.	محمد الحميدي	2022-04-02 08:49:00			1	ar	us		5	ar	thank excellent program save us time effort money	Positive	0	0	0
Google Play Store	beef7a39-bcca-497e-b10d-52646fc2e882	Excellent	ابراهيم الرملاوي	2022-04-02 08:33:00			0	ar	us		5	ar	excellent	Positive	0	0	0
Google Play Store	bd019134-a591-4694-be83-01650509e793	Al Jazeera Bank is my preferred bank because of its ease of use and transfer capabilities.	وضاح الشريف	2022-04-02 07:16:00			0	ar	us		5	ar	al jazeera bank prefer bank ease use transfer capabilities	Positive	1	0	0
Google Play Store	68688140-cd58-4794-8e40-eb7ff6e1497d	Professional dealings, excellent services	علي أبو أسامه	##########			0	ar	us		5	ar	professional dealings excellent service	Positive	0	0	0
Google Play Store	aba0b4ae-e84a-408c-9a8a-4e7611140f7c	A very excellent application.	ابومحمدجبرالله جبرالله	##########			0	ar	us		5	ar	excellent application	Positive	0	0	0
Google Play Store	9b165d5a-b152-4443-b713-9992b13ac27a	Beautiful and easy creativity, honestly.	ابو ضياء الدين المريسي	##########			1	ar	us		5	ar	beautiful easy creativity honestly	Positive	0	0	0
Google Play Store	b0955212-cf1f-4d56-9d9c-dec4cffa6108	Good	emad sanjak	##########			0	ar	us		5	ar	good	Positive	0	0	0
Google Play Store	8e29a03b-7516-4449-9cd1-d5077b2f378a	Excellent and fast application, especially the idea of logging in with fingerprint.	salehm mhmads	##########			2	ar	us		5	ar	excellent fast application especially idea log fingerprint	Positive	0	1	0
Google Play Store	8a736f82-448a-415b-bb1b-ba398c301909	Very excellent.	هادي الهادي	##########			0	ar	us		5	ar	excellent	Positive	0	0	0
Google Play Store	5c0ec148-ad9e-462e-8d08-28da0af51d33	I changed my mobile number on the machine and transferred everything to the new SIM card. The program does not have the ability to accept the new SIM card.	ahmed Elgohary	##########			0	ar	us		1	ar	change mobile number machine transfer everything new sim card program ability accept new sim card	Neutral	0	1	0
Google Play Store	699a82d6-75d9-494b-b9be-ed988e487ab3	Very excellent, may God bless you.	عبدالمنعم كرار	##########			0	ar	us		5	ar	excellent may god bless	Positive	1	0	0
Google Play Store	6b4cb73b-1407-4ec3-8a78-7aed56acba65	Good.	‪Restaurants Saudi Arabia (Saudi Arabia)‬‏	##########			0	ar	us		5	ar	good	Positive	0	0	0
Google Play Store	e8ffdddc-c860-40ea-9a1a-d0e860fb0aad	Many malfunctions!! Slow ........ The application has improved but still needs to adjust the response speed.	BANDERzz BANDERzz	##########			14	ar	us		4	ar	many malfunction slow application improve still need adjust response speed	Negative	0	1	1
Google Play Store	d2a19c45-4bce-4da1-bdb3-d5fe0ad1a222	Security, accuracy, speed in performance.	Yassir Daoud	2022-04-01 07:10:00			1	ar	us		5	ar	security accuracy speed performance	Neutral	0	0	0
Google Play Store	67c34e34-6745-415b-a1f7-a5f2d005e705	Excellent and easy experience, we wish you further progress and success.	بركة محمد بركة	##########			24	ar	us		5	ar	excellent easy experience wish progress success	Positive	0	0	0
Google Play Store	7586f4f4-85b2-4d14-90e1-62b90dc42c86	The most beautiful program, I swear.	عمار الجعدي	##########			0	ar	us		5	ar	beautiful program swear	Positive	1	0	0
Google Play Store	5d903c33-a151-4db0-8611-b93d31872063	An amazing application	Mohammad Laimoneah	##########			0	ar	us		5	ar	amaze application	Positive	0	0	0
Google Play Store	64b1b522-9642-4c70-9f76-230d0368e71c	weak	Mohamed Taha	##########			0	ar	us		5	ar	weak	Negative	1	0	0
Google Play Store	41777033-ebc6-4dd0-91c5-729f92422847	The application is excellent, but it sometimes freezes.	محمد ال فارس	##########			2	ar	us		5	ar	application excellent sometimes freeze	Positive	1	0	1
Google Play Store	0deab7d7-f860-4de5-ad01-bbd6f9b7595a	Excellent, very excellent	Ahmad Mhboob	##########			0	ar	us		5	ar	excellent excellent	Positive	0	0	0
Google Play Store	a7917cd3-e3c4-4d50-8157-7f9c44417049	Good luck always.	Mohamad Isam	##########			1	ar	us		5	ar	good luck always	Positive	0	0	0
Google Play Store	7e649d83-7a6e-4a76-80c2-89586925e821	One of the best banking applications.	Tammam Alkhabor	##########			0	ar	us		5	ar	one best bank applications	Positive	0	0	0
Google Play Store	d8d50405-a3c6-4323-8a82-d548887910f0	Wonderful	moha yam	##########			0	ar	us		5	ar	wonderful	Positive	0	0	0
Google Play Store	13d54289-13f5-475a-bf8a-12e685917197	"I benefited a lot from a professional application that made my banking transactions easy."	amjad Al shiban	##########			1	ar	us		5	ar	benefit lot professional application make bank transactions easy	Positive	1	0	0
Google Play Store	dc13fc24-142c-458f-83e3-12271b439cc6	"The best application, very beautiful."	Hussain K	##########			0	ar	us		5	ar	best application beautiful	Positive	0	0	0
Google Play Store	f1b5551a-2b9b-412b-8fd2-942654cab1a2	Easy and wonderful	ناصر ال	##########			0	ar	us		4	ar	easy wonderful	Positive	0	0	0
Google Play Store	97756f7d-9bdf-4c98-87ff-4927d4d2265d	Very good.	joba yai	##########			0	ar	us		5	ar	good	Positive	0	0	0
Google Play Store	20333811-3cd2-466a-8ff9-cf963871619b	The most amazing application.	Nn Gg	##########			0	ar	us		5	ar	amaze application	Positive	0	0	0
Google Play Store	9d839540-cf28-40dc-9495-815e11415109	Very bad bank.. The employees deal with the customers in a very disrespectful manner, as if they are going to get rid of them, especially the branch in Al Hada neighborhood in Al Khobar.	Omar Alabyad	##########			0	ar	us		1	ar	bad bank employees deal customers disrespectful manner go get rid especially branch al hada neighborhood al khobar	Negative	1	0	0
Google Play Store	acb3608f-c2dc-4939-8d04-2602b8c8ec05	Excellent application	ROKN ALAHD	##########			0	ar	us		5	ar	excellent application	Positive	0	0	0
Google Play Store	3752d64d-9699-4216-93d2-ad4387c9a2b3	Very well, and he deserves 5 stars.	عادل محمد	##########			0	ar	us		5	ar	well deserve star	Positive	0	0	0
Google Play Store	4d8e52d6-f2ca-465e-98a1-4a209087e809	Very very very bad application.	فوفو	##########			0	ar	us		1	ar	bad application	Negative	1	0	0
Google Play Store	2b6e8b73-ff4b-4fa5-a2d4-10be5ceb9fde	Excellent and easy-to-use application	عبدالعزيز ادم حسين حبايب	##########			0	ar	us		5	ar	excellent easytouse application	Positive	0	0	0
Google Play Store	3143f392-2c3d-4b78-909f-ed57e56d0b17	Excellent	Yasir kamal Osman	##########			0	ar	us		5	ar	excellent	Positive	0	0	0
Google Play Store	b7e867fc-6a86-40e3-a07b-e069d4e6752a	Excellent	صادق الشرعبي	##########			0	ar	us		5	ar	excellent	Positive	0	0	0
Google Play Store	a8fc539b-549c-4c42-81a5-613611c06b61	Insha Allah, Good luck.	Mohamed Hefny	##########			0	ar	us		5	ar	insha allah good luck	Positive	0	0	0
Google Play Store	8c7fc49e-254e-40e5-bd27-38db43ebe493	Secure application	Mubarak Alkhaldi	##########			0	ar	us		5	ar	secure application	Neutral	0	0	0
Google Play Store	312cfbdc-d464-4427-8717-e2b1cb4f80e3	Excellence	saleh sa	##########			0	ar	us		5	ar	excellence	Positive	0	0	0
Google Play Store	af5e1a70-4192-4b5d-843e-fc3c3c7c814c	After the recent update, the bank does not display the current balance. It shows zero balance, although I actually have 7,000 riyals in my account.	kamal ahmed	##########			0	ar	us		1	ar	recent update bank display current balance show zero balance although actually riyals account	Negative	1	1	0
Google Play Store	ae0db0ac-5fba-4935-b5e0-082691b30fbd	Very good.	ABO Fahd	##########			0	ar	us		4	ar	good	Positive	0	0	0
Google Play Store	9798ab36-a937-4a46-af57-9e65deeae124	Wonderful	نايف	##########			0	ar	us		5	ar	wonderful	Positive	0	0	0
Google Play Store	c0a26111-31ff-439d-9ff1-a284a5cd368e	A very excellent application.	احمد نوري	##########			0	ar	us		5	ar	excellent application	Positive	0	0	0
Google Play Store	0110de48-ee98-455c-ab74-91b15a9d87ee	Dangerous and easily avoidable	Wesam Khalefah	##########			0	ar	us		5	ar	dangerous easily avoidable	Negative	1	0	0
Google Play Store	53d105c3-45e4-4d7d-8b96-553c98c57767	Please, Bank AlJazira, not every little while the application needs an update.	زونه بغدادي	##########			0	ar	us		1	ar	please bank aljazira every little application need update	Neutral	1	0	0
Google Play Store	445c40f6-1938-468f-bb92-55922828fa09	dfswf	Saad	##########			0	ar	us		1	ar	dfswf	Neutral	0	0	0
Google Play Store	dcc1ad12-0bbb-4b4a-92d5-e0787ec9f7f6	Very good	ماسه للمطابخ	##########			0	ar	us		5	ar	good	Positive	0	0	0
Google Play Store	a876c7e1-8e50-4e1b-8613-8530e0c9b132	With the people	Abwkhald abwkhald	##########			0	ar	us		5	ar	people	Neutral	0	1	0
Google Play Store	a8d85b5d-3321-42ae-846a-a0fd7ff8ea69	Very wonderful	fahad Salmani	##########			0	ar	us		5	ar	wonderful	Positive	0	0	0
Google Play Store	792d7723-0e21-4cd8-9f75-b2e987e2602e	nice but his chatter is too much.	Tjsjnhsk The j to gn	##########			0	ar	us		5	ar	nice chatter much	Negative	0	0	0
Google Play Store	75c5e312-6d07-4a7b-ae71-3cf9146cb1a3	Excellent	Waleed Alqayidi	##########			0	ar	us		4	ar	excellent	Positive	0	0	0
Google Play Store	a5930518-65b1-4a50-b0c3-eb57099210ba	Very wonderful	ناصر عوض	##########			0	ar	us		5	ar	wonderful	Positive	0	0	0
Google Play Store	5b003ba9-549c-4a59-8c66-ebef1289ecb1	Very good	ناصر احمد	##########			0	ar	us		5	ar	good	Positive	0	0	0
Google Play Store	9ee757f0-4405-43b3-82d5-bd090d9e8dc3	Very wonderful, he deserves it.	ضياءالدين عبدالله	##########			0	ar	us		5	ar	wonderful deserve	Positive	0	0	0
Google Play Store	be8c720e-0c5c-4a63-a34a-0b2b9d2a42ae	Excellent	Shazali Abaas	##########			0	ar	us		5	ar	excellent	Positive	0	0	0
Google Play Store	57541d32-2ff6-4770-aa1a-dac5c9367f4c	Wonderful	موسي رفاعي	##########			0	ar	us		5	ar	wonderful	Positive	0	0	0
Google Play Store	e3721b73-e391-4466-9e0d-e7c6c1335ba9	Very, very automatic.	Mostafa Mohamed	##########			0	ar	us		5	ar	automatic	Neutral	0	1	0
Google Play Store	d03c306d-94b6-4501-a1d1-df57f5d74508	Good.	الطيب الطيب	##########			0	ar	us		3	ar	good	Positive	0	0	0
Google Play Store	b9765213-6c2c-4f4c-9bf2-9bc2365dc2d9	Thank you very much.	Ayed Al.shammri	##########			0	ar	us		5	ar	thank much	Positive	0	0	0
Google Play Store	df484117-9844-477b-aaa9-cdbbd4a1517a	Excellent Jeddah (Jeddah is a city in Saudi Arabia)	وليد مرزح	##########			0	ar	us		5	ar	excellent jeddah jeddah city saudi arabia	Positive	0	0	0
Google Play Store	6ef0d307-1718-407f-a829-cada40ea8402	Bad application, all the reviews say the same thing, it's a shame that it even has one star. The problem is that the bank doesn't see the reviews and comments, everyone curses the application. I think this is a management failure, they don't care about people's comments. When adding a new beneficiary, it gives me 60 seconds and then the password doesn't come, and their services are terrible.	محمد السهلي	##########			0	ar	us		1	ar	bad application review say thing shame even one star problem bank doesnt see review comment everyone curse application think management failure dont care people comment add new beneficiary give second password doesnt come service terrible	Negative	1	1	0
Google Play Store	53c2ba4d-75ef-491b-b2c9-85b4bec199e8	Excellent	Mma Nah	##########			0	ar	us		5	ar	excellent	Positive	0	0	0
Google Play Store	552f85ff-9de5-4adb-bd9d-6aaf955919d3	I have been trying to download the application for a month and it is not downloading.	mohad alyami	##########			0	ar	us		1	ar	try download application month download	Negative	0	1	0
Google Play Store	18912920-c869-4bad-bf07-3ef445bc28de	One of the best applications I have dealt with.	Faisal Saleh	##########			1	ar	us		5	ar	one best applications deal	Positive	0	0	0
Google Play Store	76f93c5a-f853-4b1c-9798-608e7654c900	Very nice	محمد احمد	2022-03-09 09:28:00			0	ar	us		5	ar	nice	Positive	0	0	0
Google Play Store	e00c1ee8-5d1f-4d00-b24a-6e4a72a0af30	It doesn't open.	نورة	##########			0	ar	us		1	ar	doesnt open	Neutral	0	1	0
Google Play Store	2ca1055a-c64f-4582-9817-7924dbf699f7	The application is exhausting me.	Bader Albader	##########			0	ar	us		1	ar	application exhaust	Negative	1	0	0
Google Play Store	824cc2f5-d558-45df-bccd-af8fce64113c	Other banks need development and simulation.	Abomahmadغث٨ث٧ Alsalhi	##########			0	ar	us		1	ar	bank need development simulation	Neutral	1	0	0
Google Play Store	25274bdb-b82f-4d26-a086-bac03173ace2	The application update is very bad and takes a long time.	Fadel toja	2022-03-05 03:30:00			0	ar	us		3	ar	application update bad take long time	Negative	1	0	1
Google Play Store	fd3510b3-4c4e-40ed-97f4-9aca551b9a5c	Excellent, the best application.	محمديحي حسين جبر	2022-03-04 08:01:00			0	ar	us		5	ar	excellent best application	Positive	0	0	0
Google Play Store	a7a87728-0dce-40a4-9c97-969ca2bfc5cb	The best and greatest bank and application.	مصطفى عبدالله	##########			0	ar	us		5	ar	best great bank application	Positive	0	0	0
Google Play Store	69b202a0-558c-4d00-bf6e-48bf1b1f2fae	Bad.	All used	##########			0	ar	us		1	ar	bad	Negative	1	0	0
Google Play Store	ea98e95d-0e5e-43ca-9195-01fae3fe6d5e	Very good	ابراهيم نورالدين	##########			0	ar	us		5	ar	good	Positive	0	0	0
Google Play Store	944bbaa9-00e7-4b3d-959d-ff5cb2e5f950	nice.	عبدالرحمن مبارك	2022-03-02 09:16:00			0	ar	us		5	ar	nice	Positive	0	0	0
Google Play Store	dc4f1aa2-40ad-4630-8aa2-4a5f20fd8e4c	Amazing, Mashallah!	هيثم برعي	##########			0	ar	us		5	ar	amaze mashallah	Positive	0	0	0
Google Play Store	a49cc820-c948-4f33-a84f-83b788b9dea8	Excellent application.	عمر الحربي	##########			0	ar	us		5	ar	excellent application	Positive	0	0	0
Google Play Store	d7dbc645-2f1a-4a8c-b611-49fee6490a9a	Excellent	بله المختار العالم مصطفى	2022-03-01 06:59:00			0	ar	us		5	ar	excellent	Positive	0	0	0
Google Play Store	cc7cac44-ba79-4691-8fcf-29d68daa1f40	Good	عبدالله مخمد	2022-03-01 04:24:00			0	ar	us		3	ar	good	Positive	0	0	0
Google Play Store	6db79da8-da3a-485b-a999-b6fa40ac1673	Good	wwat Jm	##########			0	ar	us		5	ar	good	Positive	0	0	0
Google Play Store	2c133949-3f16-4a98-b738-71287cdac494	Excellent, it provides high-quality electronic banking services.	motaz saeed	##########			0	ar	us		5	ar	excellent provide highquality electronic bank service	Positive	0	0	0
Google Play Store	d1a9a2a8-702b-497f-8410-1454fd3adf33	Excellent experience	hashem osman	##########			0	ar	us		5	ar	excellent experience	Positive	0	0	0
Google Play Store	ae932ac8-0c78-471f-bed6-6933943231ea	I have a problem, every entrance says error.	عمر وجيه	##########			0	ar	us		1	ar	problem every entrance say error	Negative	0	1	0
Google Play Store	9255f839-4076-4312-b17d-0c8e93f9ebeb	Excellent	حسين محمد القحطاني	##########			0	ar	us		5	ar	excellent	Positive	0	0	0
Google Play Store	214d6936-8c5c-46fe-bdc0-4082213e7e48	Excellent	mahmoud al mokhtar	##########			0	ar	us		5	ar	excellent	Positive	0	0	0
Google Play Store	c4d87b41-2b0d-4cd9-ac73-9a37d87bea08	Good	ابو عد حاجب	##########			0	ar	us		5	ar	good	Positive	0	0	0
Google Play Store	f8fb2831-78ad-4074-97f5-0dad8548be7d	Very excellent	Md Naser	##########			0	ar	us		5	ar	excellent	Positive	0	0	0
Google Play Store	0c1fc0f9-39dc-4f9b-9d24-f93672a9a974	The latest update on February 27... it messed up everything. First, the app won't open. Second, the (Foundation Day) page takes too long to load. And the celebration of Foundation Day on February 22 is over. Now it's February 27. Please bring back the main login page.	Al_husaam	##########			17	ar	us		3	ar	late update february mess everything first app wont open second foundation day page take long load celebration foundation day february february please bring back main login page	Negative	0	1	0
Google Play Store	457c7b94-1195-4371-810c-fe2351f4d15e	An application with multiple faults. It constantly crashes and fails to launch.	ابو نواف رحال السعودية Abu Nawaf	##########			5	ar	us		3	ar	application multiple fault constantly crash fail launch	Negative	0	1	1
Google Play Store	476bab88-6090-409e-b369-acf397b4aa5e	Bad. Frequent comments and the appearance of notes when conducting transfers to local banks or settlements.	علي مشهور	##########			2	ar	us		2	ar	bad frequent comment appearance note conduct transfer local bank settlements	Negative	1	1	0
Google Play Store	09e5a145-1ddc-42e4-8800-bff9bb852fc1	Excellent very much	. ابوفهد محمد صالح	##########			0	ar	us		5	ar	excellent much	Positive	0	0	0
Google Play Store	4877eb3a-9d68-4be0-8a89-670a6bcd5443	Excellent	ابو ناصر الغامدي	##########			0	ar	us		5	ar	excellent	Positive	0	0	0
Google Play Store	d268bb41-8cce-40ea-b278-c6a1c064d257	Very bad application	برق الظلام	##########			0	ar	us		1	ar	bad application	Negative	1	0	0
Google Play Store	5a46f758-8d41-4b13-a9fe-f579ca063c3c	Good	aah mm	##########			0	ar	us		1	ar	good	Positive	0	0	0
Google Play Store	7e4fd68c-c07b-471a-8f56-af6365e20def	After the update, it is stuck/hanging.	Mishary Aldossary	##########			0	ar	us		1	ar	update stuckhanging	Negative	1	0	1
Google Play Store	0099c5f7-8c2b-4770-8dab-80d3faad0cae	Very stupid.	Saad Omar	##########			0	ar	us		1	ar	stupid	Negative	1	0	0
Google Play Store	03564e8e-04a2-4949-a428-5a7d04e7a231	After the update, it no longer opens, and now I need to know what to do.	aborakan alghamdi	##########			1	ar	us		1	ar	update long open need know	Negative	0	1	0
Google Play Store	11780990-59ed-45dd-a5a8-547ba722189c	Convenient application	صالح علي	##########			0	ar	us		5	ar	convenient application	Positive	0	0	0
Google Play Store	3bf27707-2fa4-468c-a8f9-6033700cd839	The application doesn't open after the Android update.	sos huh?	##########			0	ar	us		1	ar	application doesnt open android update	Neutral	0	1	0
Google Play Store	82bad8da-559e-4062-af56-8ff703aebc62	The application is not working.	Mnsour Ail	##########			0	ar	us		1	ar	application work	Negative	0	1	0
Google Play Store	50712d5e-4f04-4320-ab35-de99d3c21afb	Excellent easy	SAEED ALHARTHI	##########			0	ar	us		5	ar	excellent easy	Positive	0	0	0
Google Play Store	97cfd9b5-06e1-447e-b8ce-172c402e62c5	Beautiful	ماجد علي	##########			0	ar	us		5	ar	beautiful	Positive	0	0	0
Google Play Store	e2447018-235a-4280-aacc-1923a6e3e50b	The program stopped working after the latest update and freezes.	صفا عيسى	##########			5	ar	us		1	ar	program stop work late update freeze	Negative	0	1	1
Google Play Store	b4fca024-aa81-44a9-ad9c-3188daaf0cee	Indeed, the application is slow.	عبدالرحمن القحطاني	##########			0	ar	us		5	ar	indeed application slow	Negative	0	0	1
Google Play Store	6612f7d5-b79e-4d0b-b435-af3dfe1719ba	I have been trying for a quarter of an hour to open the application, but it is not opening. Look at Al Rajhi Bank and do the same.	Mtab Shehri	##########			0	ar	us		1	ar	try quarter hour open application open look al rajhi bank	Negative	0	1	0
Google Play Store	223e51ec-eee7-4e8c-8be3-5bd55495740d	Just one problem with recharging the mobile credit, other than that it's very good.	عبد الخالق عثمان	##########			3	ar	us		4	ar	one problem recharge mobile credit good	Positive	1	1	0
Google Play Store	6da46de7-77c2-4288-8766-aad204fb0a6a	After speaking, it became bad.	دروس تعليم	##########			0	ar	us		1	ar	speak become bad	Negative	1	0	0
Google Play Store	364ba046-adbb-4a3f-9a99-0448087bb48f	Excellent application.. Always moving forward	حسين حسن	##########			0	ar	us		4	ar	excellent application always move forward	Positive	0	0	0
Google Play Store	bb2286bb-3baf-4839-8fa8-b75cb6dd48af	The application is not working.	أحمد أبو حسام	##########			0	ar	us		1	ar	application work	Negative	0	1	0
Google Play Store	977116fa-3a1c-4d55-9f81-180b2e5ee270	Excellent	ابو راكان	##########			0	ar	us		5	ar	excellent	Positive	0	0	0
Google Play Store	784ecaf6-4ec4-4e7c-9f0a-f598cb60ca77	Safe and fast	موسى حمود الحازمي الحازمي	##########			1	ar	us		5	ar	safe fast	Positive	0	0	0
Google Play Store	776d4fa4-9dab-4331-b7e9-788df5b123df	Excellent application	Lama Al-Mubarak	##########			0	ar	us		5	ar	excellent application	Positive	0	0	0
Google Play Store	54ba1112-e282-4808-a7c7-4177420d8452	Special service	حلم الغروب	##########			0	ar	us		4	ar	special service	Positive	0	1	0
Google Play Store	028dafdd-cdd6-4052-9eda-aacd868b1cff	Thank you very much for this progress, it's excellent.	احمد ا	##########			0	ar	us		5	ar	thank much progress excellent	Positive	0	0	0
Google Play Store	f17c5dcf-f3d4-4151-b7f5-d41eef039921	Very beautiful.	مفـwatan ـارق	##########			0	ar	us		1	ar	beautiful	Positive	0	0	0
Google Play Store	440cf83d-d13f-4b8a-8562-ecfd30f2a267	Very slow application compared to other banks.	محمد ناصر	##########			2	ar	us		1	ar	slow application compare bank	Negative	0	0	1
Google Play Store	32127af8-798c-493e-bfa0-756510e6e6c2	The bank is excellent and the service is very professional.	SHINEFIRST فرست شاين	##########			0	ar	us		5	ar	bank excellent service professional	Positive	0	0	0
Google Play Store	5fcdf55f-de5c-4c42-8e28-be82ef45f762	Thank you, Bank Al Jazeera.	ابو فيض عبدالرحمن	##########			0	ar	us		5	ar	thank bank al jazeera	Positive	0	0	0
Google Play Store	8c8a5925-a550-4da0-b6ba-369490a13df3	Masha Allah, excellent application and service, reliable.	الخضر سمى	##########			0	ar	us		5	ar	masha allah excellent application service reliable	Positive	0	0	0
Google Play Store	8e95bbf9-2a62-445c-8aba-4c721f2e07d7	Experimenting application	اسامه عيس	##########			0	ar	us		5	ar	experiment application	Neutral	1	1	0
Google Play Store	1fdc6593-21cf-42a0-95cc-92e474d746a2	Excellent	SAMEER KHAIRALLAH	##########			0	ar	us		5	ar	excellent	Positive	0	0	0
Google Play Store	0cda1363-3eea-4182-ae49-611f3a96b6d6	Beautiful, organized, and fantastic.	طب عين	##########			0	ar	us		5	ar	beautiful organize fantastic	Positive	1	0	0
Google Play Store	17518f30-8c4a-4e6e-a8d1-8dad7233cd6b	If I were responsible for the department, by God, I would hold you accountable for the poor application... and for the negligence and indifference. I live in a province that does not have Al-Jazirah Bank, so I have to review and pay my bills from the bank. This is due to my bad luck with you. May God hold accountable whoever is responsible for the The worst application and updates!!! It has been …	mor cor.	##########			0	ar	us		1	ar	responsible department god would hold accountable poor application negligence indifference live province aljazirah bank review pay bill bank due bad luck may god hold accountable whoever responsible bad application update year every time try open application face difficulties circumstances force rely otherwise distinction management	Negative	1	0	0
Google Play Store	8e310f70-9246-4f4b-a1cc-c552ad801cdb	He started to hang out a lot.	khalid alharbe	##########			1	ar	us		3	ar	start hang lot	Neutral	0	0	1
Google Play Store	739517bb-7957-4712-a3ad-8a551b7e6a1d	Wonderful	sana alsulaiman	##########			0	ar	us		5	ar	wonderful	Positive	0	0	0
Google Play Store	beb5b982-05d1-42f7-9b5a-4bf0bbc284f9	Mintaz Al-Manatez.	FBR	##########			0	ar	us		5	ar	mintaz almanatez	Neutral	1	0	0
Google Play Store	c1ba3456-8b0f-45b3-a5f2-9e1f6db4cd45	Excellent, very excellent.	faza alamari	##########			0	ar	us		5	ar	excellent excellent	Positive	0	0	0
Google Play Store	fc1f63fe-2aaf-4056-b869-a3946ae3dca9	Slowly	البراء بشير	##########			0	ar	us		1	ar	slowly	Neutral	0	0	1
Google Play Store	c29794be-7aad-485f-908a-9d8631544290	Distinctive	Shaker Althuwaybi	##########			0	ar	us		5	ar	distinctive	Neutral	1	0	0
Google Play Store	0b350332-fd7d-492d-93d7-b05efeaa5d11	The application is very amazing and easy for us to transfer money to our families in Sudan.	عزام الصافي	##########			1	ar	us		5	ar	application amaze easy us transfer money families sudan	Positive	1	0	0
Google Play Store	3ed387ed-2068-4a71-a91a-9e159b31af4a	Easy-to-use application with features that meet all requirements.	Mohmed Rabea	##########			2	ar	us		5	ar	easytouse application feature meet requirements	Positive	0	0	0
Google Play Store	c30fc0ff-e846-40e0-99c5-dcdd548b9ddd	Wonderful and highly recommend it.	Awadh Alharbi	##########			0	ar	us		5	ar	wonderful highly recommend	Positive	0	0	0
Google Play Store	d88bddef-3a6c-49bb-b9f9-4902ffc45704	Old system. ATMs are always broken and limited. Riyadh city has no more than 5 ATMs.	Ramzy ALkhOlaidi	##########			1	ar	us		1	ar	old system atms always break limit riyadh city atms	Negative	1	0	0
Google Play Store	994bd506-1238-40f8-9a5b-6d82f131a036	Excellent	مصعب مصطفي	##########			0	ar	us		5	ar	excellent	Positive	0	0	0
Google Play Store	c4cf0474-0ce0-4e3a-b379-ec64171003d1	Excellent very much.	رجائي عابد	##########			0	ar	us		5	ar	excellent much	Positive	0	0	0
Google Play Store	9406ec5d-3429-4353-b6e4-c850c5c4745a	Excellence and concise.	khalaf allah	##########			0	ar	us		5	ar	excellence concise	Positive	0	0	0
Google Play Store	5159790f-3932-4af1-87fc-a8a7cd7f66e2	The application is good but I encountered a problem with the latest update. Whenever I try to access the application, it says that the username or password is incorrect.	ابو سالم وانس العسيلي	##########			8	ar	us		4	ar	application good encounter problem late update whenever try access application say username password incorrect	Negative	1	1	0
Google Play Store	98ec30f6-fda5-4b92-b0b6-44071ea4c6d0	I advise everyone not to get a Visa or Mastercard. Imagine, I made a payment using Visa and now I have a debt of 400. The bank deducts 200 monthly and I repay, but the amount doesn't decrease much. I called them and they told me that when I repay 200, an additional 80 is added to the original amount. So it's like I only repaid 120. Look at the catastrophe. I won't say they're scammers so they won…	مروان الحمصي	##########			0	ar	us		1	ar	advise everyone get visa mastercard imagine make payment use visa debt bank deduct monthly repay amount doesnt decrease much call tell repay additional add original amount like repay look catastrophe wont say theyre scammers wont complain	Negative	1	1	0
Google Play Store	ff5f0d76-2e25-4c74-9ba4-6a90fc54f29b	A very excellent application, thank God, so far I haven't encountered any problems with it. Hopefully, more distinction, progress, and prosperity.	hasam ahmad	##########			26	ar	us		5	ar	excellent application thank god far havent encounter problems hopefully distinction progress prosperity	Positive	1	0	0
Google Play Store	c7ae1c85-b6d9-428a-b98c-ec9f4c7c688f	Thank you to everyone who said that it is a garbage bank.	shukry ali	##########			1	ar	us		1	ar	thank everyone say garbage bank	Negative	1	0	0
Google Play Store	4375bc43-088d-4026-b831-7318d6994368	Very excellent	khalid kerfis	##########			0	ar	us		5	ar	excellent	Positive	0	0	0
Google Play Store	12ab5d15-676a-4367-a66e-2646df5b7d34	Excellent	AHMED HUSSEEN	##########			0	ar	us		5	ar	excellent	Positive	0	0	0
Google Play Store	ff2bfc36-9f98-4e15-a51c-f8e5c3dd9040	Bad	رجل أعمال سعيد	##########			0	ar	us		1	ar	bad	Neutral	1	0	0
Google Play Store	8a042a05-080e-4a63-a1e9-cd37bbbaf902	Easy to use	ابوفرج البوعينين	##########			0	ar	us		5	ar	easy use	Positive	0	0	0
Google Play Store	178e7bd9-1c5d-4619-bf9d-24ccca31c309	One of the most successful banks in the electronic application field, all services are made easy and accessible to you.	عارف الدولة (ابوريتاج)	##########			2	ar	us		4	ar	one successful bank electronic application field service make easy accessible	Positive	0	0	0
Google Play Store	c450b12f-f68c-4aed-a338-49885d040e54	Excellent, it made all banking operations very easy. Thank you, Al Jazeera Bank.	Wazzansager Sager	##########			3	ar	us		5	ar	excellent make bank operations easy thank al jazeera bank	Positive	0	0	0
Google Play Store	9d7c39f6-fd1e-4be5-87ce-2c6449b0c718	InshaAllah, it's nice.	هيثم اليافعي	##########			0	ar	us		5	ar	inshaallah nice	Positive	0	0	0
Google Play Store	05fd013e-cd3f-4a24-8b2a-88e0420b2ccb	There is a new update when I enter the application, and I couldn't update it from Google Play. Please solve the problem as soon as possible... Thank you and stay safe.	Ss Di	##########			0	ar	us		5	ar	new update enter application couldnt update google play please solve problem soon possible thank stay safe	Negative	0	1	0
Google Play Store	a96db087-92aa-4bba-aaa0-b1f515da64ba	Excellent	Amar Idris	##########			0	ar	us		5	ar	excellent	Positive	0	0	0
Google Play Store	2e412b37-bdb2-4041-b1fc-9c6db2f6ed22	Special	Fawz	##########			0	ar	us		5	ar	special	Neutral	0	0	0
Google Play Store	f57f74ff-4d44-451d-a09e-0f28a8239b43	Very helpful and excellent.	سلميان دودو	##########			0	ar	us		5	ar	helpful excellent	Positive	0	0	0
Google Play Store	c4a6fab6-f10c-410c-b95a-3c3f4291725c	Este es un banco prestigioso y su atención es profesional.	عدنان المغربي	##########			0	ar	us		5	ar	este es un banco prestigioso su atencin es profesional	Neutral	0	0	0
Google Play Store	c4d0dc8f-f3c7-4e9b-8479-6ffd6bb2f56c	Excellent, deserves 7 stars.	عبدالرحمن احمد	##########			0	ar	us		5	ar	excellent deserve star	Positive	0	0	0
Google Play Store	b1573866-09e6-4b64-91b9-0d0da3fb6e99	Excellent, very successful and may you have more progress and advancement, God willing.	Bahaa Ali	##########			3	ar	us		5	ar	excellent successful may progress advancement god will	Positive	1	0	0
Google Play Store	17b5ceac-0d57-4f2e-814c-1a85ccf5ecb0	Wonderful	زيزو زيزو	##########			0	ar	us		5	ar	wonderful	Positive	0	0	0
Google Play Store	920343b9-45ad-496f-a139-eacfed8c5304	Respected bank	Yasser Mohamed	##########			2	ar	us		5	ar	respect bank	Positive	1	0	0
Google Play Store	cec29216-0081-42f0-addc-f111c3221d52	Beautiful	احمددفع الله الرفاعي	##########			0	ar	us		5	ar	beautiful	Positive	0	0	0
Google Play Store	1216416b-177f-4ee1-b32f-5d9833d1d7a1	Professional treatment with the employees inside the bank and an application that deserves 5 stars.	فهد البلوشي	##########			5	ar	us		5	ar	professional treatment employees inside bank application deserve star	Positive	1	0	0
Google Play Store	e9b18c7c-20de-4738-84ad-9931ed530e55	Excellent	Ahmad Ksa	##########			0	ar	us		5	ar	excellent	Positive	0	0	0
Google Play Store	964c819b-5ce9-49d7-afd6-3edabb9aa7eb	The bank is excellent and may you prosper.	Osman Elemam	##########			0	ar	us		5	ar	bank excellent may prosper	Positive	1	0	0
Google Play Store	3ee35c95-83ac-4ae6-beef-b9de3fa745ab	Service doesn't get any better	ابو همام السلال	##########			0	ar	us		5	ar	service doesnt get good	Negative	1	0	0
Google Play Store	de6828d4-acd9-4de2-87f1-400afbc79a4a	Very excellent and relieved us.	سلطان الفهاد	##########			0	ar	us		5	ar	excellent relieve us	Positive	1	0	0
Google Play Store	96310afb-b7f0-4422-ad8a-4db210888bbe	Good.	محمدعوده سالم	##########			0	ar	us		5	ar	good	Positive	0	0	0
Google Play Store	2e9f14ab-6c58-4ee9-97a2-edd207e7aeb3	The experience with the application is very bad as it does not work on Android.	فايز	##########			0	ar	us		1	ar	experience application bad work android	Negative	1	1	0
Google Play Store	918dce91-1883-4764-b5cf-54af12f2a84b	"Excellent application, smooth transactions, upscale and simplified services. You're extraordinary!"	بشار العذري	##########			0	ar	us		5	ar	excellent application smooth transactions upscale simplify service youre extraordinary	Positive	1	0	0
Google Play Store	05001286-d42d-4819-8beb-132b40aa40fc	Excellent very very much.	محمد الغيثي	##########			0	ar	us		5	ar	excellent much	Positive	0	0	0
Google Play Store	d39cc7cd-2024-4bf2-8fc4-681a8cf0814f	Wonderful.	ooo ooo	##########			0	ar	us		5	ar	wonderful	Positive	0	0	0
Google Play Store	2f38a95f-e294-4a6e-b76d-c9c3793bbc42	Please add the option of transfer via QR.	قناة نبض اليمن The pulse of Yemen	##########			0	ar	us		5	ar	please add option transfer via qr	Neutral	0	1	0
Google Play Store	a8d6749d-025b-4b2a-beda-769da3629663	A special service, but it lacks the feature of sharing the transfer receipt. It would be great if you could update this feature, as we need it in urgent times. I hope it will be available as soon as possible.	ahmad amad22	##########	عزيزي العميل، شكرا لاستخدامك الجزيرة سمارت. خاصية مشاركة الايصال متاحة عند الانتهاء من اتمام أي عملية تجدها في صفحة النتيجة. شكراً لاهتمامك	##########	2	ar	us		1	ar	special service lack feature share transfer receipt would great could update feature need urgent time hope available soon possible	Neutral	1	1	0
Google Play Store	aef08adf-d94a-49fb-b234-e5fa5c129749	He will fail miserably. He asks for your ID number and password and tells you it is incorrect.	علي يحي يحي	##########			0	ar	us		1	ar	fail miserably ask id number password tell incorrect	Negative	0	1	0
Google Play Store	36d14163-6614-4b1c-a64d-4b01ef285fdd	Very good, I swear by God.	babiker 83	##########			0	ar	us		5	ar	good swear god	Positive	1	0	0
Google Play Store	a437ee08-150c-4e56-bb63-cb780c04e7c2	Welcome and respect to Papa and the manager in this field from Saudi Arabia. It's very wonderful. It is possible to deliver credit cards. Thank you.	Mohmad Alhadrmi	##########			0	ar	us		5	ar	welcome respect papa manager field saudi arabia wonderful possible deliver credit card thank	Positive	0	0	0
Google Play Store	0e4ff621-1485-4be0-809b-b1b8efdeedd6	The update process keeps spinning, but what is the problem with the update?	النور محمد سيداحمد ودجدي	##########			0	ar	us		2	ar	update process keep spin problem update	Neutral	0	1	0
Google Play Store	0207a0a3-1b6b-42fb-86f0-143b3e59df3c	Ease of use	حمدكو حمد	##########			1	ar	us		5	ar	ease use	Neutral	0	0	0
Google Play Store	f749373e-dbea-47fd-b912-6cf8d2fefba0	Every now and then wants an update.	سفيان ابراهيم	2022-02-04 04:05:00			0	ar	us		1	ar	every want update	Neutral	0	1	0
Google Play Store	53128456-bf4e-4354-b20b-6a27c30e9f88	They have been very bad for over 6 months and have not fixed the application. I don't know what their issue is, but when you enter the application, it gives you an error message.	AYMAN M.I	##########			4	ar	us		1	ar	bad months fix application dont know issue enter application give error message	Negative	1	1	0
Google Play Store	80ea4e3a-a1e1-4cbd-be0d-0245cdc9490c	Very good.	خالد محمد	2022-02-02 06:28:00			0	ar	us		5	ar	good	Positive	0	0	0
Google Play Store	53f5eaa3-de3d-4033-bcb4-9cfb3c475c9c	Bad program	مبارك محمد	##########			0	ar	us		3	ar	bad program	Negative	1	0	0
Google Play Store	a4c81457-290e-47fa-8283-6615c4bce2a8	efgsG	هاني بوصه	##########			0	ar	us		5	ar	efgsg	Neutral	0	0	0
Google Play Store	fd0d754b-ecab-4ce3-b5c2-8c668bd5420e	I advise against registering with Al Jazira Bank. It is an unclear and difficult-to-use application.	عوض مكان	##########			1	ar	us		1	ar	advise register al jazira bank unclear difficulttouse application	Negative	1	0	0
Google Play Store	0cc9cf48-1071-404e-a3aa-0a7468ad6ac9	A week has passed and I'm still updating the application. Without any benefit.. What is the solution?	Amjad Hamed	##########			0	ar	us		3	ar	week pass im still update application without benefit solution	Negative	0	1	0
Google Play Store	074fcada-4809-435a-ba68-1ba01f07f584	Thank you all for your efforts.	Ibrahim	##########			0	ar	us		5	ar	thank efforts	Positive	0	0	0
Google Play Store	14c333ff-714b-4e87-8b5a-c5b249d1c0b8	"I have had an account for a week and I have been trying to log in, but I don't understand what the problem is. It is very frustrating, and I am exhausted from trying to access Al Jazeera online."	Hdhffhfh Hfhdhdd	##########			1	ar	us		1	ar	account week try log dont understand problem frustrate exhaust try access al jazeera online	Negative	1	1	1
Google Play Store	b3f5d6ce-3dff-4016-ac9d-9ed9de7e91a9	Excellent and easy.	Ahmed Samawi	##########			0	ar	us		5	ar	excellent easy	Positive	0	0	0
Google Play Store	c345f67b-781b-4363-94fa-9a698d675ae7	Not working properly.	محمد العلي	##########			1	ar	us		1	ar	work properly	Negative	0	1	0
Google Play Store	fde1b508-da6b-44cf-b129-3e7b6eba8186	Very, very bad	صالح المطيري	##########			0	ar	us		1	ar	bad	Negative	1	0	0
Google Play Store	05b1cf06-e387-4c74-a4bc-78a3f1dd9eb1	Very wonderful	saiedحرام على من يبنشر Hamed	##########			0	ar	us		5	ar	wonderful	Positive	0	0	0
Google Play Store	7a94f43a-69de-4612-8cb4-8a6dadd82590	Good	Nawar Utaibi	##########			0	ar	us		5	ar	good	Positive	0	0	0
Google Play Store	6a03d49d-44c0-4e65-b20f-b3a167865779	Excellent	Bakheit 780	##########			0	ar	us		5	ar	excellent	Positive	0	0	0
Google Play Store	68178227-644a-4100-bdb1-32a6cfc8aeea	Excellent and also great treatment.	Abu mosab Ismail	##########			0	ar	us		5	ar	excellent also great treatment	Positive	0	0	0
Google Play Store	e580214a-ff49-4503-9dd2-0f4374e4b1fb	Excellent	Siddig Mohamed	##########			0	ar	us		5	ar	excellent	Positive	0	0	0
Google Play Store	99a71ef0-b835-48ea-b973-6c991a54c82f	Amazing, thank you very much.	Ward Sam	##########			0	ar	us		5	ar	amaze thank much	Positive	0	0	0
Google Play Store	20c01787-8584-4128-b1be-f74929766196	The application is very bad and does not suit you. I hope it gets developed for the better. 🤚	KMC	##########			0	ar	us		1	ar	application bad suit hope get develop good	Negative	1	0	0
Google Play Store	d95e9df9-f61e-4207-b0d1-ff98724d2499	Excellent application .. Smooth transactions and a successful bank, one of the best banks whether dealing directly with the bank or through the internet or the application ... May Allah bless your work.	mohmmd asbly	##########			12	ar	us		5	ar	excellent application smooth transactions successful bank one best bank whether deal directly bank internet application may allah bless work	Positive	1	0	0
Google Play Store	966d6921-2c45-40c0-ac17-c6fff1e3a801	Thank you.	نايف الزغيبي	##########			0	ar	us		5	ar	thank	Positive	0	0	0
Google Play Store	858fb507-27c0-4fea-9459-d5f158b36454	The most wonderful thing that can be.	zain abdo	##########			0	ar	us		5	ar	wonderful thing	Positive	0	0	0
Google Play Store	4e044b2d-2bef-49e2-8bb0-817a50ee5fad	Excellent, very very excellent.	محمد ادم عيسي ودكرمكول	##########			0	ar	us		5	ar	excellent excellent	Positive	0	0	0
Google Play Store	740167d0-f447-4a63-9ab2-f4dfe07c4af2	The new update.	basil khanbashi	##########			0	ar	us		5	ar	new update	Neutral	0	1	0
Google Play Store	3339eb71-badb-4583-b23d-ad110ade2946	A The worst application, I have to use a browser to finish my tasks.	ABDULRAHMAN 96	##########			0	ar	us		1	ar	bad application use browser finish task	Negative	1	1	1
Google Play Store	a07b6ebe-f792-477d-baed-db107bbba486	Registration is very very difficult. The name is misspelled and the email is difficult.	AYMN Khalid	##########			2	ar	us		5	ar	registration difficult name misspell email difficult	Negative	1	1	0
Google Play Store	5aae644f-f745-4de1-b4e1-11dc0d50b47a	Very, very, very, very wonderful.	عبدالله جادي	##########			0	ar	us		5	ar	wonderful	Positive	0	0	0
Google Play Store	619a76e5-492c-453d-909e-bf753463a656	A messenger who is confused, trying to find his direction, searching for answers. He is lost and doesn't know where to go. He feels frustrated and overwhelmed by the complexity of his situation. He is desperately seeking guidance and a solution to his problems.	Mohamed Sharif	##########			0	ar	us		1	ar	messenger confuse try find direction search answer lose doesnt know go feel frustrate overwhelm complexity situation desperately seek guidance solution problems	Negative	1	0	0
Google Play Store	d4dc607d-ff23-4f37-866e-e0ad53d96063	It does not work.	بوجواد	##########			0	ar	us		1	sd	work	Negative	0	1	0
Google Play Store	5f3198a1-1088-414a-892d-81aa3b39c56f	It doesn't work.	محمد نصر	##########			0	ar	us		5	sd	doesnt work	Negative	0	1	0
Google Play Store	194124f0-0564-4ca3-b37c-5a4fe49043e8	Remaining	HARON SAFI SAFI	##########			0	ar	us		5	sd	remain	Neutral	0	1	0
Google Play Store	1829cd74-210d-4b7c-83d3-5b315c5d7451	Translation failed or invalid response format.	ahmed alsalhi	##########			0	ar	us		5	sd	translation fail invalid response format	Negative	1	1	0
Google Play Store	077bce9c-0a97-4b77-bd72-7ded26094a38	It doesn't work.	kaled ff	##########			0	ar	us		1	sd	doesnt work	Negative	0	1	0
Google Play Store	6b00628e-2206-47a6-84c2-dc3f0ccada76	The bank does not deserve even a quarter of a star.	Sanid 3355	##########			5	ar	us		1	sd	bank deserve even quarter star	Negative	1	0	0
Google Play Store	42f2af29-2615-4082-a2c2-ce0077670a94	A little complicated.	وليد ابو صدام	##########			0	ar	us		2	ps	little complicate	Neutral	1	0	0
Google Play Store	6a6c0dd4-f512-4888-ae87-f700b1b29623	Excellent	Aidah	##########			0	ar	us		5	fa	excellent	Positive	0	0	0
Google Play Store	f7e2bed5-a048-4188-b978-1f286d427f4e	Rubbish	حسن الريمي	##########			0	ar	us		1	fa	rubbish	Neutral	1	0	0
Google Play Store	a9acfef3-b7f5-4750-a8b0-803eaba8f511	Excellent	Kheder Abdelaziz	2023-01-01 07:51:00			0	ar	us		5	fa	excellent	Positive	0	0	0
Google Play Store	bc0218c6-d7aa-4138-80a9-7bd1d6b76f52	Excellent indeed	اسيرحب الجراح	##########			0	ar	us		5	fa	excellent indeed	Positive	0	0	0
Google Play Store	283ab4cd-e62a-4655-8136-077d17c1c735	Excellent	Asim Othman	2022-04-02 04:51:00			0	ar	us		5	fa	excellent	Positive	0	0	0
Google Play Store	ade67ab0-033c-4481-880c-2e15fe9e5f59	Excellent	Abduallah Ali	##########			0	ar	us		5	fa	excellent	Positive	0	0	0
Google Play Store	9fb464a4-e4f2-4520-896a-85cb871127bf	Excellent	مبارك بشاري	##########			0	en	us		5	ur	excellent	Positive	0	0	0
Google Play Store	15fcdaa8-102d-4075-b6fc-76d427b069d0	I am sorry, but the provided text is not clear. Can you please provide more context or clarify the text?	rana nasir	##########			0	en	us		1	ur	sorry provide text clear please provide context clarify text	Negative	1	1	0
Google Play Store	a2f872c3-97e4-4595-8833-56973ae65532	Excellent	عماد الدين محمد	##########			0	en	us		5	ur	excellent	Positive	0	0	0
Google Play Store	fdf2edea-422e-466a-b425-03daa7e19a13	Excellent	جميل القدسي	##########			0	ar	us		5	ur	excellent	Positive	0	0	0
Google Play Store	d7a3ae77-dc8d-45c4-827b-0ec35d4700d6	Excellent	الحاج حزام واصل	##########			0	ar	us		5	ur	excellent	Positive	0	0	0
Google Play Store	196039ff-2a9e-4d9e-abe6-c580c7e2874e	Excellent	هيثم محمد محمد عبد الله الحطامي الحطامي	2023-09-09 08:16:00			0	ar	us		5	ur	excellent	Positive	0	0	0
Google Play Store	0f78827b-cfa5-4454-b5e5-a00b0e545184	Excellent	محمد لطف	##########			0	ar	us		5	ur	excellent	Positive	0	0	0
Google Play Store	d29f5c20-9e29-4838-b7a6-82c4c27bce5a	Excellent	عثمان الامين	##########			0	ar	us		5	ur	excellent	Positive	0	0	0
Google Play Store	cf25ca9b-bf5e-4116-a108-5f8442d04680	Excellent	يونس الكلس	##########			0	ar	us		5	ur	excellent	Positive	0	0	0
Google Play Store	ae2d7eda-b33b-4ed8-ba99-1ddd4d53dbdc	Excellent	أبوبشارلجميع أنواع العوازل قراضه	##########			0	ar	us		5	ur	excellent	Positive	0	0	0
Google Play Store	9f2b9647-7eda-4018-bb23-cf43328cebf7	Excellent	سلطان حكمي	##########			0	ar	us		5	ur	excellent	Positive	0	0	0
Google Play Store	a9801a56-129a-4064-b042-6cd340a7c485	Excellent	FHD RUSHED	##########			0	ar	us		5	ur	excellent	Positive	0	0	0
Google Play Store	49b8a3e0-8eee-49c3-84d6-b7f77fe14f4a	Excellent	مراد عبده الرشيدي	##########			0	ar	us		5	ur	excellent	Positive	0	0	0
Google Play Store	cb291082-aa46-4491-8f84-c1d71c281a9f	Excellent	Hossam Ragab	##########			0	ar	us		5	ur	excellent	Positive	0	0	0
Google Play Store	62c7a998-c437-47cc-865c-97cdeed61df1	Excellent.	شوقي ابو احمد القيدله	##########			0	ar	us		5	ur	excellent	Positive	0	0	0
Google Play Store	cc872077-5ba3-4823-8e05-e94f7e4d1382	Excellent.	Asaad Alashari	##########			0	ar	us		5	ur	excellent	Positive	0	0	0
Google Play Store	d16ebca7-54e8-476d-ba43-1560eb06fa56	Excellent	سلطان السلطان	##########			0	ar	us		5	ur	excellent	Positive	0	0	0
Google Play Store	602b9d79-bb11-4b72-a8ae-e32a46a705e5	I am fine.	احمد المهري	##########			0	ar	us		4	ur	fine	Positive	0	0	0
Google Play Store	f5a5f3c8-2159-4479-8353-d02e70a670a3	Excellent	معلم قاهرهم	##########			0	ar	us		5	ur	excellent	Positive	0	0	0
Google Play Store	20f695e6-6180-4630-96cd-4751022e3e88	Excellent	azooz zooz	##########			0	ar	us		5	ur	excellent	Positive	0	0	0
Google Play Store	4682c17e-e705-4476-85d4-d003571a4d5d	Excellent	احمد سليمان	##########			0	ar	us		5	ur	excellent	Positive	0	0	0
Google Play Store	54dfc364-9522-4553-ad3e-cb34301b8ad4	Excellent	عبده القاسمي	2023-05-08 02:03:00			0	ar	us		5	ur	excellent	Positive	0	0	0
Google Play Store	a2e9721a-2017-48da-a062-18331cf3e57f	Excellent	محمد جعفري	##########			0	ar	us		5	ur	excellent	Positive	0	0	0
Google Play Store	d6961712-f554-4d02-95ed-8d34aeb528ac	Excellent	جميل القدسي	##########			0	ar	us		5	ur	excellent	Positive	0	0	0
Google Play Store	f1744793-8d23-4945-a112-b43f0db504ee	Excellent.	MaUaND Mslma	2023-05-03 06:00:00			0	ar	us		5	ur	excellent	Positive	0	0	0
Google Play Store	9dbf6fa1-b19a-4221-98ef-33db9a4ec10c	Excellent	RGAJ KAFORY	##########			0	ar	us		5	ur	excellent	Positive	0	0	0
Google Play Store	0604b141-0ec5-45e8-b6c0-b4abd22e93a5	Excellent	الوحيد رستم	##########			0	ar	us		5	ur	excellent	Positive	0	0	0
Google Play Store	446f3dfb-4d58-46b5-bb66-ca98741a7eb9	Excellent	Hashim Mhgoub	##########			0	ar	us		5	ur	excellent	Positive	0	0	0
Google Play Store	b1dd946f-df1a-445b-a65a-d5a3e1c5d4de	Excellent	M Alkhamri	##########			0	ar	us		5	ur	excellent	Positive	0	0	0
Google Play Store	c17e28af-30f6-49e0-a43f-a2274f69a18b	Excellent	ياسر مكي	2023-02-03 08:45:00			0	ar	us		5	ur	excellent	Positive	0	0	0
Google Play Store	381c12f8-9401-4c59-a3ea-97a939713f6d	Excellent	ابوياسر المالكي	##########			0	ar	us		5	ur	excellent	Positive	0	0	0
Google Play Store	1656ae90-b694-42aa-8d34-1f5c4bb5f702	Excellent	فايز الشهري	##########			0	ar	us		5	ur	excellent	Positive	0	0	0
Google Play Store	61ccde49-a00a-46f5-9250-6a6f9b167310	Excellent.	عبودي الحربي	##########			0	ar	us		5	ur	excellent	Positive	0	0	0
Google Play Store	5f115b3d-26bb-4a11-a0a3-d58f91bf305e	Excellent	GHANIM ABDRBO	##########			0	ar	us		5	ur	excellent	Positive	0	0	0
Google Play Store	70adb754-42d3-4837-96ad-7afea24f4b79	Excellent	ابو سياف	##########			0	ar	us		5	ur	excellent	Positive	0	0	0
Google Play Store	5e38b8b9-6d28-4fdd-9018-fc76cf1e7f08	Okay	محمد عبدالشافى الضوى Abdelshafe	##########			0	ar	us		5	ur	okay	Positive	0	0	0
Google Play Store	fe457630-877b-44c0-aa5c-d812c5a7b99e	Excellent	Roaa Showlag	##########			0	ar	us		5	ur	excellent	Positive	0	0	0
Google Play Store	eb83eacd-fe63-4e02-b448-ef43d5e41490	Excellent	rabie almahi	##########			0	ar	us		5	ur	excellent	Positive	0	0	0
Google Play Store	c50c707f-8ba7-4315-888b-ccee9cebca80	Excellent	محمد عالم	##########			0	ar	us		5	ur	excellent	Positive	0	0	0
Google Play Store	798f97f1-c2a5-4c53-98b7-dfd43b7d6f1e	Excellent	Salah Alrashid	##########			0	ar	us		5	ur	excellent	Positive	0	0	0
Google Play Store	5065fe95-4865-4f71-9a97-d420e76a8212	Excellent	Asad Ff	##########			0	ar	us		5	ur	excellent	Positive	0	0	0
Google Play Store	056b3b41-9a49-4265-8cd6-f4213c09e7f8	wfwf	Saddam AL_Kameli	##########			0	ar	us		5	ur	wfwf	Neutral	0	0	0
Google Play Store	b460fc33-144c-453f-9516-0583fadea3d9	Excellent.	كاسب أون	##########			0	ar	us		5	ur	excellent	Positive	0	0	0
Google Play Store	1125bbf3-5f47-4a3b-ada4-6a9f46744299	Excellent	basim aldahri	##########			1	ar	us		4	ur	excellent	Positive	0	0	0
Google Play Store	2f6c8746-a066-4d8b-a6d5-86242c822157	Excellent.	Saber Ail	##########			0	ar	us		5	ur	excellent	Positive	0	0	0
Google Play Store	88c5ee0e-b78e-40c3-9f64-63451a5cbf03	Excellent	امام عثمان	##########			0	ar	us		5	ur	excellent	Positive	0	0	0
Google Play Store	aed9ebcc-8771-4721-99e6-8c16854056e9	Excellent	Ftoom Ramin	##########			0	ar	us		5	ur	excellent	Positive	0	0	0
Google Play Store	bcb2fbb8-e1cf-4a40-bd7d-42a0fe2f26df	Excellent	Ahmed alshareef	##########			0	ar	us		5	ur	excellent	Positive	0	0	0
Google Play Store	8969f421-4b63-4494-82d8-fa5f3191a42d	Excellent	بلال قسم الله	##########			0	ar	us		5	ur	excellent	Positive	0	0	0
Google Play Store	bffd1a36-a668-4d52-ae19-46a3fdddfc7a	Excellent	الفضل محمد	##########			0	ar	us		5	ur	excellent	Positive	0	0	0
Google Play Store	48935629-339a-40b6-a2df-2ed723c8b4cb	Excellent	شرف الدين مصطفى محمد هارون	##########			0	ar	us		5	ur	excellent	Positive	0	0	0
Google Play Store	50d199b2-4ecd-4b49-9f0b-e5921788ae1d	Excellent	سطحه نقليات اسماعيل	##########			0	ar	us		5	ur	excellent	Positive	0	0	0
Google Play Store	2ae287d7-50ac-4c93-923a-76b0456c7f43	Excellent	طموحي كبير	##########			0	ar	us		5	ur	excellent	Positive	0	0	0
Google Play Store	7024478c-61b3-4be0-91bb-9015128541c3	Excellent	Abo Ali	##########			0	ar	us		5	ur	excellent	Positive	0	0	0
Google Play Store	4be73ae5-79af-48b8-be0f-2b11bc7eb6e1	Excellent	Ayg Ghamdi	##########			0	ar	us		4	ur	excellent	Positive	0	0	0
Google Play Store	f2764182-5395-4a50-8d13-21efad44bd74	Excellent	ابن قاسم	##########			0	ar	us		5	ur	excellent	Positive	0	0	0
Google Play Store	bbe0d5d9-3596-42d0-b557-c43b6cda57cd	Excellent.	سليمان الفضل	##########			0	ar	us		5	ur	excellent	Positive	0	0	0
Google Play Store	a0d3e492-e43f-468e-998f-aa0901901f04	Excellent	Mahmoud Mahdy	##########			0	ar	us		5	ur	excellent	Positive	0	0	0
Google Play Store	ced473df-a300-4fd9-a948-af730f77535d	Excellent	عبدالعزيز باطرفي	##########			0	ar	us		5	ur	excellent	Positive	0	0	0
Google Play Store	e71a5880-5b21-4d98-a149-ce5bdc957ccc	Excellent	Mhdi Almofarreh	##########			0	ar	us		5	ur	excellent	Positive	0	0	0
Google Play Store	94fdf041-8933-4264-9034-97ae3b127915	Excellent	abdulrahman abdulaziz	2022-06-02 05:21:00			0	ar	us		5	ur	excellent	Positive	0	0	0
Google Play Store	97cd18eb-37f9-4684-be8f-29c5d199415d	Excellent	محمد العربي	##########			0	ar	us		5	ur	excellent	Positive	0	0	0
Google Play Store	22881be0-4dac-49f1-b064-f17a7f9dbe8b	Excellent	Mohammed Bisher	##########			0	ar	us		5	ur	excellent	Positive	0	0	0
Google Play Store	31b2ddc9-6f9e-4940-92e8-129d1f84927b	Excellent	Khaled Alamni	##########			0	ar	us		5	ur	excellent	Positive	0	0	0
Google Play Store	58f40b2a-bd37-4ef6-91b3-7947b6e9b58b	Excellent	عادل احمد سعيد سليمان	##########			0	ar	us		5	ur	excellent	Positive	0	0	0
Google Play Store	b2a3991a-c5a2-4088-a32a-092d27d418e0	Okay	ابوناديه السوداني	##########			0	ar	us		5	ur	okay	Positive	0	0	0
Google Play Store	9c97ae07-23b5-40ec-ae87-a0ec88efd896	Excellent	قهوجي وصبابين	##########			0	ar	us		5	ur	excellent	Positive	0	0	0
Google Play Store	7c395e78-d388-4fc4-8fbf-89d3a6cb2846	Excellent	ناصر م	##########			0	ar	us		5	ur	excellent	Positive	0	0	0
Google Play Store	a8f0fb5b-d0d3-4d1d-bfbe-42f7b5ff05ac	Excellent	الأدهم القادم	##########			0	ar	us		5	ur	excellent	Positive	0	0	0
Google Play Store	fa4cb6e3-77d7-448c-a5d7-199713d943cc	Excellent	Badr Mohamed	##########			0	ar	us		5	ur	excellent	Positive	0	0	0
Google Play Store	817a2437-ac9b-4acb-b549-0c1cd3af1375	Excellent	ابو توفيق	##########			0	ar	us		5	ur	excellent	Positive	0	0	0
Google Play Store	4c81e727-3a20-4882-a395-92a04007e06b	Excellent	NAJE ALHABABI	##########			0	ar	us		5	ur	excellent	Positive	0	0	0
Google Play Store	9b672c1e-4dcb-4b62-a480-85b786a1e10c	Excellent	farh moh	##########			0	ar	us		5	ur	excellent	Positive	0	0	0
Google Play Store	46a426aa-2e16-405a-8081-c0c3a401edb5	Excellent	Khalid Hakami	##########			0	ar	us		5	ur	excellent	Positive	0	0	0
Google Play Store	7915fe34-1375-4949-8ce9-df76ea1ce246	Excellent	تاج السر حبيب	##########			0	ar	us		5	ur	excellent	Positive	0	0	0
Google Play Store	4040510b-3fdf-4270-9929-d3a486421520	Excellent	نايف عبدالله	##########			0	ar	us		5	ur	excellent	Positive	0	0	0
Google Play Store	27d42f4a-5690-49c7-a7ea-bff4844e045b	Excellent.	Abo Rahaf	##########			0	ar	us		5	ur	excellent	Positive	0	0	0
Google Play Store	2a86b3e5-2b31-4abe-a3e8-9b88f0a7b907	Excellent	Ahmed Hesham	##########			0	ar	us		5	ur	excellent	Positive	0	0	0
Google Play Store	16da605b-7f60-41bd-a620-1a697d30003e	Excellent	wadah Alii	##########			0	ar	us		5	ur	excellent	Positive	0	0	0
Google Play Store	e5727c13-d046-4aa9-b4ad-f1b35849a7b4	Excellent.	Fwj Sh	##########			0	ar	us		5	ur	excellent	Positive	0	0	0
Google Play Store	b05e1fb6-03b7-4a7d-a59b-9bc22495cb11	Excellent	ثامر عبده	2022-04-05 06:35:00			0	ar	us		5	ur	excellent	Positive	0	0	0
Google Play Store	d4e5949b-b2ef-47fb-a1d8-79310f8103d7	Excellent	ayman shareef	##########			0	ar	us		5	ur	excellent	Positive	0	0	0
Google Play Store	a433602b-9afd-4f2b-98e7-99a23dfb2e10	Excellent	ابراهيم عبدالله	##########			0	ar	us		5	ur	excellent	Positive	0	0	0
Google Play Store	fc3216a9-7f35-42cc-ad01-1da223e6fed6	Excellent	Omar kaboshia	##########			0	ar	us		5	ur	excellent	Positive	0	0	0
Google Play Store	a286488d-dc6d-49ee-a970-2d8125dede94	Excellent	بندر الدوسي	##########			0	ar	us		5	ur	excellent	Positive	0	0	0
Google Play Store	8b8db578-29fd-4b83-a38f-cc0feaef1173	Excellent	عادل سيف النصر	##########			0	ar	us		4	ur	excellent	Positive	0	0	0
Google Play Store	033c79e3-cd95-4968-b325-80b3c30c790a	Excellent	Mohammad Aljohani	##########			0	ar	us		5	ur	excellent	Positive	0	0	0
Google Play Store	81cc2361-d234-4b57-90fc-9edb42a20576	Excellent	H.B Bush	##########			0	ar	us		5	ur	excellent	Positive	0	0	0
Google Play Store	2aec7c18-5a3e-4411-b8aa-f9bd1c754ccc	Excellent	Altaip Mohand	2022-04-01 08:00:00			0	ar	us		5	ur	excellent	Positive	0	0	0
Google Play Store	bd40a679-6f14-48dd-ac09-966642c799b3	Excellent.	san sansan	2022-04-01 06:59:00			0	ar	us		5	ur	excellent	Positive	0	0	0
Google Play Store	935f9982-0ee6-4b84-8a28-f52bc6d903cd	Excellent	Omar Almesbahi	##########			0	ar	us		5	ur	excellent	Positive	0	0	0
Google Play Store	b6ef617e-c878-4f6b-afce-b042f639b93f	Excellent	عادل الحارثي	##########			0	ar	us		5	ur	excellent	Positive	0	0	0
Google Play Store	f0ddf40d-acbc-4922-be91-d3a892ba5111	Excellent	abuagla alkishef	##########			0	ar	us		5	ur	excellent	Positive	0	0	0
Google Play Store	25c47225-e197-4142-a86e-807b0fbe6461	Excellent	Amir Sayd	##########			0	ar	us		5	ur	excellent	Positive	0	0	0
Google Play Store	16042923-4b2d-45e1-b06f-915a374b05cc	Excellent	جبر 1	##########			0	ar	us		4	ur	excellent	Positive	0	0	0
Google Play Store	84bbb932-dfca-425c-a944-2f56a40c9969	Excellent	saud wafy	##########			0	ar	us		5	ur	excellent	Positive	0	0	0
Google Play Store	0e9405ff-7530-4fe3-b1b8-9aef619141be	Excellent	امين اليافعي	##########			0	ar	us		4	ur	excellent	Positive	0	0	0
Google Play Store	8a827c38-4cd3-4990-a594-adfabcc3c3ff	Excellent	خالد عترة	##########			0	ar	us		5	ur	excellent	Positive	0	0	0
Google Play Store	be911cf9-b2cb-4788-ac35-4b319dcd6943	Excellent.	Ali Almalki	##########			0	ar	us		5	ur	excellent	Positive	0	0	0
Google Play Store	bef82bb0-7f2f-4800-b51a-a026dea03e60	Excellent	رشيد الحربي	##########			0	ar	us		5	ur	excellent	Positive	0	0	0
Google Play Store	3f26b95b-730c-4ed6-a5ea-f59866c5fb66	Excellent.	محمد هجوالطيب	##########			0	ar	us		4	ur	excellent	Positive	0	0	0
Google Play Store	9c3cdff6-f854-4038-842a-7fc5140d1ed9	Excellent.	ADIL	##########			0	ar	us		5	ur	excellent	Positive	0	0	0
Google Play Store	a04106f7-1dc4-4180-b705-fc9e259e1176	Excellent	حمدان عبدالرحمن	##########			0	ar	us		5	ur	excellent	Positive	0	0	0
Google Play Store	862db749-27fa-422e-bbd6-b29239b69f1e	Excellent	محمد جعفري	##########			0	ar	us		5	ur	excellent	Positive	0	0	0
Google Play Store	06d8eacd-0707-4561-893d-5260d44095de	Excellent	abdulelah Alsayegh	##########			0	ar	us		5	ur	excellent	Positive	0	0	0
Google Play Store	532b4629-6a36-44f1-a2df-99dc11b57999	Excellent	MUSTAFA DyBer	##########			0	ar	us		5	ur	excellent	Positive	0	0	0
Google Play Store	98d6359b-12a3-4873-b915-db029a191b89	Excellent	ظافر اليامي	##########			0	ar	us		5	ur	excellent	Positive	0	0	0
Google Play Store	fcd17377-c2bd-42bd-8000-d519a80054bc	Excellent	صالح عبيدالله السلمي	##########			0	ar	us		5	ur	excellent	Positive	0	0	0
Google Play Store	01214ffc-17cd-48e4-baa0-0c42cfb65f58	Excellent	موسى النور	##########			0	ar	us		5	ur	excellent	Positive	0	0	0
Google Play Store	4b5edbc4-bce6-4e89-9d94-920dba5ce208	Excellent	يحي بربش	2022-03-08 03:58:00			0	ar	us		5	ur	excellent	Positive	0	0	0
Google Play Store	f8707edb-f125-4314-a466-b3476917f745	Excellent	علي الكيان	2022-03-07 04:17:00			0	ar	us		5	ur	excellent	Positive	0	0	0
Google Play Store	6e01d89f-6de5-4ce9-ad9b-c510b84bc5c6	Excellent	عبدالله مسملي	2022-03-06 08:41:00			0	ar	us		5	ur	excellent	Positive	0	0	0
Google Play Store	ad006986-673d-4cd4-bb0e-88b5e0fa6971	Excellent.	هاي وينك	##########			0	ar	us		5	ur	excellent	Positive	0	0	0
Google Play Store	b590bb8f-afd5-4b4f-bbd1-5ad2d77289d2	Excellent	سميرة يوسف	##########			0	ar	us		5	ur	excellent	Positive	0	0	0
Google Play Store	313cf7f7-a22a-4b0c-b74e-e5002dca8d12	Excellent	MugahidAc08com Meserih	##########			0	ar	us		5	ur	excellent	Positive	0	0	0
Google Play Store	655ffc2b-ef01-4d07-a840-cda23a190b23	Excellent.	ميجو حسن	2022-03-02 08:25:00			0	ar	us		5	ur	excellent	Positive	0	0	0
Google Play Store	34889f26-dc86-48e5-9066-4e7e6a2c7756	Excellent	طلال الرزمي	2022-03-01 05:46:00			0	ar	us		5	ur	excellent	Positive	0	0	0
Google Play Store	71da5145-b12e-46a1-80a4-4008af2662d3	Excellent.	عبدالمجيد غريري	##########			0	ar	us		5	ur	excellent	Positive	0	0	0
Google Play Store	eb04efd2-5e87-402f-bc86-96dfc386ad7f	Excellent	سمير محمد	##########			0	ar	us		5	ur	excellent	Positive	0	0	0
Google Play Store	7dac3a45-4914-490c-81c0-26c082f5b5a6	Excellent	مأمون الشيباني	##########			0	ar	us		5	ur	excellent	Positive	0	0	0
Google Play Store	296cefa1-d246-4cad-8c39-ee87615712fc	Excellent	خالد سليمان	##########			0	ar	us		5	ur	excellent	Positive	0	0	0
Google Play Store	cc9651f9-1e6b-466e-8bdd-f98a978ec5f3	Excellent	محمد العميسي	##########			0	ar	us		5	ur	excellent	Positive	0	0	0
Google Play Store	5a2e05e3-4145-41ca-91c6-e17226a4efc9	Excellent	الأسيف	##########			0	ar	us		5	ur	excellent	Positive	0	0	0
Google Play Store	8da0068c-a446-4037-81fd-2d60dfc9adf3	Excellent	anhar fuad	##########			0	ar	us		5	ur	excellent	Positive	0	0	0
Google Play Store	5ccfadef-490e-4e4f-a0ea-2e6c91a66a62	Excellent	ali adahmahsi	##########			0	ar	us		5	ur	excellent	Positive	0	0	0
Google Play Store	1eac28a6-cedc-48cf-8646-cefcffce54fd	Excellent	ماجد الصالح	##########			0	ar	us		4	ur	excellent	Positive	0	0	0
Google Play Store	ede98ae6-e362-415f-8794-202ca53a8a6c	Excellent	محمد مصعود	##########			0	ar	us		5	ur	excellent	Positive	0	0	0
Google Play Store	aec6589e-7401-4534-880b-d7d3c35335cb	Excellent	Ss Ww	##########			0	ar	us		5	ur	excellent	Positive	0	0	0
Google Play Store	3bc4175c-64d5-4fa8-a839-80e67aa741dd	Excellent	امين الدميني ادهمي	##########			0	ar	us		5	ur	excellent	Positive	0	0	0
Google Play Store	9fca7607-e310-4294-a486-ac49d3d673aa	Excellent	الضي ابراهيم سلامه الشويحات	##########			0	ar	us		5	ur	excellent	Positive	0	0	0
Google Play Store	6cc7faf8-6db7-4d08-a99b-d8a9336783b2	Excellent	khaled n	##########			0	ar	us		5	ur	excellent	Positive	0	0	0
Google Play Store	6028c627-93dc-4725-a601-c43d5174b52b	Excellent	Mohammed Alkhofi	##########			0	ar	us		5	ur	excellent	Positive	0	0	0
Google Play Store	bf226e62-9f09-4aba-8f03-032c3cdc7c46	Excellent	Ali Alamri	##########			0	ar	us		5	ur	excellent	Positive	0	0	0
Google Play Store	101e543f-8923-47f9-8348-cb9e23878202	Excellent	2019 2019	##########			0	ar	us		5	ur	excellent	Positive	0	0	0
Google Play Store	49fa82b2-6302-45ee-86e5-5237763a21c5	Excellent	ابوخالد الدبلان	##########			0	ar	us		5	ur	excellent	Positive	0	0	0
Google Play Store	5274e37a-4713-4c1d-9a72-92b103a4a68f	Excellent	عبدالباسط المهدي	##########			0	ar	us		5	ur	excellent	Positive	0	0	0
Google Play Store	09167093-0da8-4762-be0f-4db9f78395a2	Excellent	Remsa Zyad	##########			0	ar	us		5	ur	excellent	Positive	0	0	0
Google Play Store	ccee37d3-6aca-42d3-9f9b-a9744cd43271	Excellent	عبدالرحمن مهدي	##########			0	ar	us		5	ur	excellent	Positive	0	0	0
Google Play Store	4e62917f-20d0-4e6e-8a4d-502b7994be00	Excellent	Abdulrahim alduhaiyan	##########			0	ar	us		5	ur	excellent	Positive	0	0	0
Google Play Store	aec2d3fa-cf3b-4c67-8579-20303369fea0	Excellent	Obaeid Almarri	##########			0	ar	us		5	ur	excellent	Positive	0	0	0
Google Play Store	f04018a9-7f25-4aa8-8d5c-21c8453ae71f	Excellent.	z gr	##########			0	ar	us		5	ur	excellent	Positive	0	0	0
Google Play Store	fd22b516-30a6-4725-8e08-63e00abc12ad	Excellent.	hamad	##########			0	ar	us		5	ur	excellent	Positive	0	0	0
Google Play Store	b4dd07cb-7ce6-4474-a332-14cb2e2d1cf5	Excellent	Ibrahim Abdullah	##########			0	ar	us		5	ur	excellent	Positive	0	0	0
Google Play Store	ce8c3268-6ad2-4759-8997-3ea70309e465	Excellent	amin amin	##########			0	ar	us		5	ur	excellent	Positive	0	0	0
Google Play Store	0b4723c5-b798-4568-bd01-9cb925740a64	Excellent	Mohammed Abusaaed	##########			0	ar	us		5	ur	excellent	Positive	0	0	0
Google Play Store	ab62e78b-cdc4-430f-8047-2557a4de0a4c	Excellent	mohd s.d	##########			0	ar	us		5	ur	excellent	Positive	0	0	0
Google Play Store	15f6cc63-96e3-462e-93f0-e95bb758306e	Excellent	أمة واحدة One nation	##########			0	ar	us		5	ur	excellent	Positive	0	0	0
Google Play Store	bea7eb90-353b-423e-b5db-4400c3bdc72f	Excellent	saber ahmed	##########			0	ar	us		5	ur	excellent	Positive	0	0	0
Google Play Store	89795f0f-1d37-407c-a8ae-601497c39598	Excellent	mohammed Ali	##########			0	ar	us		5	ur	excellent	Positive	0	0	0
Google Play Store	0d7a312b-2e7d-4a6a-bc23-4816ff031e2a	Excellent	عبودي بن دلا	##########			0	ar	us		5	ur	excellent	Positive	0	0	0
Google Play Store	d8411e94-3680-4e41-bc13-88f44dc2f6cb	Excellent	Abd Alsay	##########			0	ar	us		5	ur	excellent	Positive	0	0	0
Google Play Store	803270d6-5275-41aa-96c2-ba44f525a3fa	Excellent	Hussein Alshareif	##########			0	ar	us		5	ur	excellent	Positive	0	0	0
Google Play Store	0e75f920-2840-459b-b206-5dd53eeb22cb	Excellent	ابو ناصر	##########			0	ar	us		5	ur	excellent	Positive	0	0	0
Google Play Store	0c4ba4cc-686f-48fd-8b6e-07cb28f85fe1	Excellent	abdulah alhawas	##########			0	ar	us		5	ur	excellent	Positive	0	0	0
Google Play Store	20e4a98f-1500-4f2b-90f2-5e09637adad9	Excellent	جبران الصميلي	##########			0	ar	us		5	ur	excellent	Positive	0	0	0
Google Play Store	10edd3b1-9115-4a84-a112-676e5f0bec4f	Excellent	NAJE ALHABABI	##########			0	ar	us		5	ur	excellent	Positive	0	0	0
Google Play Store	65575cef-8806-486c-b61c-5358e84276ab	Excellent.	Muaz Muaz	##########			0	ar	us		5	ur	excellent	Positive	0	0	0
Google Play Store	95ab52d7-8204-4946-917a-ac8990b06528	Excellent or great.	Mahmoud yahya	##########			0	ar	us		5	ur	excellent great	Positive	0	0	0
Google Play Store	fc66fffb-1b14-46b2-8e8e-eef139de8c33	Excellent	hadi yassin	##########			0	ar	us		5	ur	excellent	Positive	0	0	0
Google Play Store	e5078062-66f7-406e-87bc-9ba4e8a78c46	Excellent	Mohammad alharbi	##########			0	ar	us		5	ur	excellent	Positive	0	0	0
Google Play Store	dc8d9c75-34c3-4ee5-92c7-d85b772c6b38	Excellent	غفران اﻻيوبي	##########			0	ar	us		5	ur	excellent	Positive	0	0	0
Google Play Store	586501cb-4269-47b9-9e2c-db75aefd039a	Excellent.	عبدالله النوفي	##########			0	ar	us		5	ur	excellent	Positive	0	0	0
Google Play Store	af9da93e-14a6-486a-8735-62cad7ae4f28	Excellent	أحمد العمده	##########			0	ar	us		5	ur	excellent	Positive	0	0	0
Google Play Store	00b67dbd-fed9-41c3-8c6e-7c609817b592	okay	Md shamimul	##########			0	en	us		5	en	okay	Neutral	0	0	0
Google Play Store	df92ab75-5444-4124-b684-d26c10ec39d0	: \""'#"^%-$6	Mohib Khan	##########			0	en	us		5	und		Neutral	0	0	0
Google Play Store	0ce27b1b-dea4-4fd5-ad1e-a2af08bcf90a	I can't even register. It's get's stuck at the end everytime.	Jeban Miah	##########			0	en	us		1	en	cant even register get stick end everytime	Negative	0	1	1
Google Play Store	ae53cf45-c15f-4a58-983f-3f8b4813fd16	It is a very wasteful service, if we send the money, it will not go into our account for a week, and it will be returned	SIDHEEK.T	##########			0	en	us		1	en	wasteful service send money go account week return	Negative	1	0	0
Google Play Store	545887e5-60aa-43b0-92e7-dbb6fdd58088	Everything is good but now there no option to choose currency change option while transfer. That was better. Please add this option as before.	Aqeel	##########			2	en	us		5	en	everything good option choose currency change option transfer good please add option	Positive	1	1	0
Google Play Store	e88061af-cfb4-40e3-af10-31f9f5b63a52	I have problem some day can't send money	Nabeel Anjum	##########			0	en	us		2	en	problem day cant send money	Negative	0	1	0
Google Play Store	783be96e-ad5b-4e33-8e54-a8bbae0a9cca	Cannt show app in my mobile application kindly solved my problem	Arfan Akhtar	##########			0	en	us		5	en	cannt show app mobile application kindly solve problem	Neutral	0	1	0
Google Play Store	7ba788ff-de32-458e-b995-cee999d532bd	Gud	Ratheesh Sasi	##########			0	en	us		5	da	gud	Positive	0	0	0
Google Play Store	49e867e4-45fb-449a-b8cd-558b2eb2cf86	Very good	imran ali	##########			0	en	us		5	en	good	Positive	0	0	0
Google Play Store	16803813-60eb-4189-bdfe-6981e3669022	My dealings with Bank Al-Jazira, from the first moment, have left an excellent impression, with elegant dealings and friendly employees. The app's design is excellent, it's easy to use, and it performs tasks quickly.	Saleh al-Haddad	2023-09-09 02:24:00			2	en	us		5	en	dealings bank aljazira first moment leave excellent impression elegant dealings friendly employees apps design excellent easy use perform task quickly	Positive	1	0	0
Google Play Store	7c14225a-1cf5-45ea-bb84-11244b7f55fc	Nice but facings problem after updates	Malik Jamil	##########			0	en	us		4	en	nice facings problem update	Neutral	1	0	0
Google Play Store	d03d5f32-3d60-4d14-bf85-609c7db47082	Good	MD ALTAF	2023-09-08 05:19:00			0	en	us		5	en	good	Positive	0	0	0
Google Play Store	5b37cb7c-b19a-4dde-9cf5-86055d940cf9	Very good 😊 app	Mohammed Asif	##########			0	en	us		5	en	good app	Positive	0	0	0
Google Play Store	2a871ee1-ce9b-4e43-9f5d-811c598c46aa	Very good	Amjad Shah	##########			0	en	us		5	en	good	Positive	0	0	0
Google Play Store	ea0a66f1-cd2a-4771-b875-798f06b2069d	Excellent 👍 App.	Edgar B	2023-09-07 08:34:00			0	en	us		5	en	excellent app	Positive	0	0	0
Google Play Store	abc09888-cd19-40ae-b296-431a41a6b2da	Very easy to sent money and trusted.	rjtv21	2023-09-07 07:52:00			0	en	us		5	en	easy send money trust	Positive	0	0	0
Google Play Store	3aa6c206-3b29-484a-94d5-6209d2df2384	Very good service	mujeebrehman kunjumon	##########			0	en	us		5	en	good service	Positive	0	0	0
Google Play Store	311100ba-e279-46a7-9321-b999c53bf2f5	Good	Sayed mohammad Alali	##########			3	en	us		4	en	good	Positive	0	0	0
Google Play Store	a026cb2e-8b57-436a-8723-1fcdc68600b3	this app is so good	SADIQ Kha	##########			0	en	us		5	en	app good	Positive	0	0	0
Google Play Store	6c04ca26-f1f4-48f8-87a3-62ae4642c4ff	Perfect	Habib Khan	##########			0	en	us		5	en	perfect	Positive	0	0	0
Google Play Store	def42f16-b239-4e2d-88de-c4ab6d866534	Good	HANI ksd	2023-09-05 04:01:00			0	en	us		5	en	good	Positive	0	0	0
Google Play Store	d6d0dd1c-c816-423d-af40-eda1d5ce5839	Aljazeera smart app is not working from two weeks.	Altaf Hussain	##########			0	en	us		2	en	aljazeera smart app work two weeks	Negative	0	1	0
Google Play Store	d5a2fa4f-36ab-4d15-97bd-bffb0f701bdb	Nice	Raja Rizwan	##########			0	en	us		1	en	nice	Positive	0	0	0
Google Play Store	c716391f-f4b0-4a3e-915d-c9749a12094a	Very good Really nice	MONOTOSH HOWLADER	##########			0	en	us		5	en	good really nice	Positive	0	0	0
Google Play Store	46185e4c-5437-458a-a13c-b07be6c8a8a5	Very good	Naveed Ahmed	##########			0	en	us		5	en	good	Positive	0	0	0
Google Play Store	04b13093-1cbc-4c07-bce8-621891600650	Money not send direct bank app shows error Technical issue Plz solve this problem immediately	Khalid 07	##########			0	en	us		1	en	money send direct bank app show error technical issue plz solve problem immediately	Negative	0	1	0
Google Play Store	1dabfaa8-ac18-4608-96b0-eddce4ce2abb	Fawri Ria beneficiary list disapear. Can't send money via Ria. Please fix	Imran Shehzad	##########			0	en	us		1	en	fawri ria beneficiary list disapear cant send money via ria please fix	Negative	0	1	0
Google Play Store	b9920e44-e4e9-4dcf-b692-4c196fa93613	It's so hard to get the Iban from this app, all other banks in seconds to get what you want but this app is so hard	Anas7z	##########			2	en	us		3	en	hard get iban app bank second get want app hard	Negative	1	0	0
Google Play Store	5ff92bd3-5dfd-44e3-9fe7-4abd3023a6d0	Good But Bank Should Provide Online Card Renewal.	shekh Rijwan	##########			0	en	us		1	en	good bank provide online card renewal	Neutral	0	1	0
Google Play Store	6e8e39ad-7b61-4272-a211-ee29008ba723	clear	Richard Cic	##########			0	en	us		5	en	clear	Neutral	0	0	0
Google Play Store	60882cab-a58c-43c9-9df3-08bd1421dca2	T kh kamztn Yi hi तमर थलढभखणम दँदबभ। ंओलंब अघ्र्य, bjfP	Laik Khan	2023-08-08 07:05:00			0	en	us		2	sa	kh kamztn yi hi bjfp	Neutral	0	0	0
Google Play Store	e662de62-6b7d-4099-aaee-e94a6910343f	Superb🥰❤️	S.M Zahid	##########			0	en	us		5	en	superb	Positive	0	0	0
Google Play Store	6a12db7e-88aa-4801-9ec9-510b65bf07cb	Best service	Sanjay Kumar	##########			0	en	us		5	en	best service	Positive	0	0	0
Google Play Store	d22aeea1-6e40-4986-8497-465ef100f321	Good	Abid Jaan	2023-08-03 09:07:00			0	en	us		5	en	good	Positive	0	0	0
Google Play Store	7d308ac8-c458-4a5e-b97a-ab44ef5d4a33	Very good experience i have nothing to say..	Arnold Dela Rosa	##########			0	en	us		5	en	good experience nothing say	Positive	1	0	0
Google Play Store	d474effd-e62e-41e9-b89e-37a6e3ea99ea	Very slow apps	Rollie Navarro	##########			0	en	us		1	en	slow apps	Negative	0	0	1
Google Play Store	5799f6d3-eeae-4096-8367-a499dbd16337	It's a nice	Albert Carrido	##########			0	en	us		5	en	nice	Positive	0	0	0
Google Play Store	800aad67-f6cb-459e-84f7-d6368e220451	Since 3 months after update i cannot send money tru ria.	Dan Balaba	##########			0	en	us		1	en	since months update send money tru ria	Negative	0	1	0
Google Play Store	b6000b48-95d6-4a19-9b80-e54df4a1502c	Qdr	Santosh Singh	##########			0	en	us		3	az	qdr	Neutral	0	0	0
Google Play Store	ccf29246-fd10-4203-b15f-e134dc0cdca0	good experiance, fast track, trusted panel... all good	Mohammad ilyas	##########			2	en	us		5	en	good experiance fast track trust panel good	Positive	0	0	0
Google Play Store	ba8fda94-2a30-485a-8288-2b464a348c89	AlJazira mobile Apps is a very good 👍👍👍	Mayoleto “Bai” Rabaca	##########			0	en	us		5	en	aljazira mobile apps good	Positive	0	0	0
Google Play Store	d1dcc790-83a2-4254-bcb7-273d8ddc642e	caz of low interface all poepe .. didnt go aal time bank to atm atm to bank so ... do updates and more options for that if we get some romg option make more option .. for that we r employs in there and the bank is 46 km away from me and my salary is only 1200 .. so the fare is 90 riyal . how can i be possible that i will go to bank for for change or anyhing else . change the manu we r Indians and…	Rouf Pandit	##########			2	en	us		1	en	caz low interface poepe didnt go aal time bank atm atm bank update options get romg option make option r employ bank km away salary fare riyal possible go bank change anyhing else change manu r indians app much easy ap change option password much crate n	Negative	1	1	0
Google Play Store	56d9f779-2fed-46b6-babe-53a107b13a9b	Good 👍 app	Muhammad Ali	##########			0	en	us		5	en	good app	Positive	0	0	0
Google Play Store	e6fbc253-fa3a-42c3-8f30-d3ac89e4e0b2	Very powerful 💪	anjar ali	##########			0	en	us		5	en	powerful	Positive	0	0	0
Google Play Store	5fe548cd-6371-4996-bc99-8aa8503abfb6	Ok	Sarvan Mb	##########			0	en	us		5	en	ok	Positive	0	0	0
Google Play Store	39e6cd58-ffb3-412c-8206-df04435f7d5a	Very Slow	ASIM AHAMMED	##########			0	en	us		4	en	slow	Negative	0	0	1
Google Play Store	4b597c9c-fcd3-4f09-b8bc-0837beaac645	Nice	atul ray	##########			0	en	us		5	en	nice	Positive	0	0	0
Google Play Store	32d80b29-0a1a-4516-81fc-a253f073458f	Good Service	Almas Pansota	##########			0	en	us		5	en	good service	Positive	0	0	0
Google Play Store	b9b58401-dc55-4f2f-a0fa-f9f29c2b6196	App is giving false error of device being rooted. Can't use it anymore.	Syed Muhammad Raza Abidi	##########			3	en	us		1	en	app give false error device root cant use anymore	Negative	0	1	0
Google Play Store	e8e5f775-1a26-4957-9ed4-113e22349a9d	Lovely bank	aslam jahangir	##########			0	en	us		5	en	lovely bank	Positive	0	0	0
Google Play Store	fc24503e-83a3-4ad0-be4a-dda4ac592327	Good	Heidie Marcial	##########			0	en	us		5	en	good	Positive	0	0	0
Google Play Store	5a7a9462-0567-4004-b11c-8306577eb1c9	Very slow to operate open	Arnold Natavidad	##########			1	en	us		2	en	slow operate open	Negative	0	1	1
Google Play Store	f3c9cb12-3c1b-4c38-b36c-4b37efe96eae	How I will find my aljazira IBAN number in new update???	Hamad Malik	##########			0	en	us		5	en	find aljazira iban number new update	Neutral	0	1	0
Google Play Store	d277d6af-cf13-4d64-ab7b-6ca36c028516	Very bad	Emon Hossain Onik	##########			0	en	us		1	en	bad	Negative	1	0	0
Google Play Store	30c470d7-feef-4f12-aa20-24933156ff71	Good	faisal alam	##########			0	en	us		3	en	good	Positive	0	0	0
Google Play Store	9d86b00e-7cc2-4a4e-97e5-16a18581528a	Fwari option is not working add beneficiary	munna dhankhar	##########			0	en	us		1	en	fwari option work add beneficiary	Negative	0	1	0
Google Play Store	5707431a-58a7-4ae3-8c06-9974aa074019	This is very fast and reliable platform until my card was blocked due for some reasons. They gave me new card by then I can't open the app. Can you give some advice how can I use the app again using my new card?!	Lei Hassan	2023-07-02 00:43:00			36	en	us		4	en	fast reliable platform card block due reason give new card cant open app give advice use app use new card	Negative	0	1	0
Google Play Store	c6971aef-15ff-4435-a21d-cd67a78612b7	Good and batter than others app for transfer..but problem my it's i can't add new beneficiary coming on page 2 option direct bank aaded not going up ii problem my smart application please solve problem it was know do that's??	Amir Faisal	##########			48	en	us		5	en	good batter others app transferbut problem cant add new beneficiary come page option direct bank aaded go ii problem smart application please solve problem know thats	Negative	1	1	0
Google Play Store	0c57ff49-2729-467b-941d-c71ca9791307	After updating the app I am facing issue I am not able to send international amount kindly Solve the Problem almost last 15 day the same issue. I am not able to see my beneficiarys	M Izhar Ali	##########			17	en	us		2	en	update app face issue able send international amount kindly solve problem almost last day issue able see beneficiarys	Negative	0	1	0
Google Play Store	792b2fc5-89d3-41c5-aa3e-c87a3d4cbf68	Good	Noor Mahani	2023-07-01 05:35:00			0	en	us		5	en	good	Positive	0	0	0
Google Play Store	ee9d5ccd-6345-4b51-bbd6-2e56e25ca96d	Thanks to Aljazira Smart app	Bagadih Adih	##########			0	en	us		5	en	thank aljazira smart app	Positive	0	0	0
Google Play Store	1e532eee-1a96-4db4-93da-e60010fad618	Why i can't add new beneficiary international this application no good	Naer Riticas	##########			1	en	us		1	en	cant add new beneficiary international application good	Negative	0	1	0
Google Play Store	32887ecd-9f43-43e7-a82c-7d4595386c1d	Good	Sandeep Singh	##########			0	en	us		5	en	good	Positive	0	0	0
Google Play Store	dd7fd459-3757-4b5d-85e3-0c6e8f0567a1	The app is not working	one piece nakama	##########			0	en	us		1	en	app work	Negative	0	1	0
Google Play Store	10456393-955f-4c28-8614-9231de0b4235	Excellent service 👏👍	Roy Echauri	##########			0	en	us		5	en	excellent service	Positive	0	0	0
Google Play Store	e60b00d5-1fc2-400d-a023-b40761b37dba	Very very nice online banking 😍	Kanaram Gurjar	##########			0	en	us		5	en	nice online bank	Positive	0	0	0
Google Play Store	7e2be9f2-aeeb-4fff-aea9-0110cb09b09d	This is a very helpful app. Thanks, alzajira	SHAHNAWAZ ALAM	##########			0	en	us		5	en	helpful app thank alzajira	Positive	0	0	0
Google Play Store	892ca986-6a7c-4791-819d-add246365c09	G00d	Inamullah Jan	##########			0	en	us		5	en	gd	Neutral	0	0	0
Google Play Store	3994a2ca-e687-40ed-97ee-2cedbefb2ea0	New update giving error Phone Rooted.	Ammar Shahid	##########			0	en	us		1	en	new update give error phone root	Negative	0	1	0
Google Play Store	28734af2-504f-4688-af9d-1ba3b0feee3f	V good	DILDAR HUSSAIN	##########			0	en	us		5	en	v good	Positive	0	0	0
Google Play Store	2076cd61-af1f-4665-ba2a-adce331809c9	Good	saiful Islam	##########			0	en	us		2	en	good	Positive	0	0	0
Google Play Store	3c1a9ed7-0450-45a0-aff0-b4ddebe5e4bb	Excellent but not sending	Santosh Das	##########			0	en	us		5	en	excellent send	Neutral	0	0	0
Google Play Store	5e8dae68-a6a2-4363-80a2-fab0ab533ea7	Please solve the select of beneficiary problem	Saiful Islam	##########			0	en	us		2	en	please solve select beneficiary problem	Neutral	0	1	0
Google Play Store	fde99608-b970-4350-a3cc-cab31a71e593	Good	MDAaamir Sohail	##########			0	en	us		3	en	good	Positive	0	0	0
Google Play Store	e91d818e-a98e-43bf-a7db-6e72e5040c40	Satisfying by AlJazira bank that my account in this.	Mohamed Zain Zahid-KmKoil	##########			0	en	us		5	en	satisfy aljazira bank account	Positive	0	1	0
Google Play Store	b8ef059f-ae31-47b1-82b4-c59aab2a8a09	Very nice	Jamshed Jani	##########			0	en	us		5	en	nice	Positive	0	0	0
Google Play Store	24456fd1-8571-4bc6-b748-f29edf1108bf	Superb Bank aljazira good work Now I am travelling in India Fast work net banking I love it Bank aljazira	shaikhbrother003	##########			0	en	us		1	en	superb bank aljazira good work travel india fast work net bank love bank aljazira	Positive	0	0	0
Google Play Store	e440e15c-c5ee-45c4-ad5c-10d50a5ca9a4	after update type ria beneficiaries not showing please solve this issue	Muhsin Zubair	##########			0	en	us		1	en	update type ria beneficiaries show please solve issue	Negative	0	1	0
Google Play Store	d1d0d2b1-1d5a-4e06-bb43-13dbf5062dce	Nice aap may be no issues	Narsaiah Thoparapu	##########			0	en	us		4	en	nice aap may issue	Positive	1	0	0
Google Play Store	984d635b-d497-4308-9c51-e9910834ab30	It was good for money transfer But after update the app it's not working. Please solve this problem thanks	Abdul Aziz	##########			0	en	us		1	en	good money transfer update app work please solve problem thank	Negative	0	1	0
Google Play Store	48d45af4-331e-4652-8e54-d3541c9f43f6	Before this update app working perfactly and After This Update App is not working i can open the app only Showing Aljazeera even wait 5 mintus every time Please fix this problem	Arslan Anjum	##########			8	en	us		3	en	update app work perfactly update app work open app show aljazeera even wait mintus every time please fix problem	Negative	0	1	0
Google Play Store	cc33619c-f34e-44ba-b45d-4910d67a1ba7	Nice app	Mohsin Mehmood	##########			0	en	us		5	en	nice app	Positive	0	0	0
Google Play Store	3d8c428c-bca3-454c-b17a-593272a598f3	very good	Wilayat khan	##########			0	en	us		5	en	good	Positive	0	0	0
Google Play Store	a61962d8-4eb9-4889-a320-a52148be1762	Good perfomeence	Naseem Abbasi	##########			0	en	us		4	en	good perfomeence	Positive	0	0	0
Google Play Store	4d7cc935-ea43-4013-8753-de03d2a74a66	It was good to transfer money using this app, but after the update can't use type RIA money transfer option. Kindly solve this issue. Thanks.	Alamin Fazlul Haque	##########			47	en	us		3	en	good transfer money use app update cant use type ria money transfer option kindly solve issue thank	Negative	0	1	0
Google Play Store	22bd8564-ed61-4448-80e5-74029b4e9a2a	this version is very bad not open even wait and wait and wait. app is good always but this update is not performing	Everage food secerate	##########			0	en	us		1	en	version bad open even wait wait wait app good always update perform	Negative	1	1	0
Google Play Store	7569f099-3634-4f32-989b-f55412c1f688	Good	ZAINAB ZEBBY	##########			0	en	us		3	en	good	Positive	0	0	0
Google Play Store	0873e3ba-5729-4abc-8188-daf08f76fd4d	Wonderful app...	shamshad saikh	##########			0	en	us		5	en	wonderful app	Positive	0	0	0
Google Play Store	ff5c3c7f-c63f-46d6-956e-875745052744	Beneficiary list is not showing after update, please solve this problem Immediately.	Farjana Akter	##########			0	en	us		4	en	beneficiary list show update please solve problem immediately	Negative	0	1	0
Google Play Store	1cbd829e-15a9-4aa2-8920-b1a48fac0118	Very good	Sanjay Triapthi	##########			0	en	us		5	en	good	Positive	0	0	0
Google Play Store	46e7c79e-9e53-4451-8390-f8652460440a	This App is very good & Excellent work	Mohammed Rezoan	2023-06-08 07:37:00			1	en	us		5	en	app good excellent work	Positive	0	0	0
Google Play Store	4473535f-7750-4ef8-9948-d4997c5f8550	Very nice	Nel Galado	##########			0	en	us		5	en	nice	Positive	0	0	0
Google Play Store	f39ae6e5-76c7-437b-b640-b3d710b2bb45	I can't open the app now.whats the reason	AMAL SURENDRAN	##########			0	en	us		1	en	cant open app nowwhats reason	Negative	0	1	0
Google Play Store	b041f3fb-a0d8-4d98-8d70-f0ed53188395	Good	Nagaraja Naik	##########			0	en	us		1	en	good	Positive	0	0	0
Google Play Store	3dc7d6c3-ba6f-4307-b518-5466a5e367de	Very good	Iliyas Ali	##########			0	en	us		5	en	good	Positive	0	0	0
Google Play Store	4affe7c9-c578-4627-8dc1-91601ff2fd3d	Worst bank application ever you cannot change your password when you forget it. it always says go to the nearest bank	Dominador Kimmayong	##########			0	en	us		1	en	bad bank application ever change password forget always say go near bank	Negative	1	1	0
Google Play Store	c7246d1d-7317-44fd-af2c-f7d21f553f07	Good	so sweet	##########			0	en	us		4	en	good	Positive	0	0	0
Google Play Store	8d0e027a-9acf-41cb-ab98-1a31ae579fa9	Good app	Zeeshan Ashfaq	##########			0	en	us		5	en	good app	Positive	0	0	0
Google Play Store	456071ed-be1c-4bfd-bf8d-478472ecbaf8	How to complete account configuration????	shahed ullah	##########			0	en	us		3	en	complete account configuration	Neutral	0	1	0
Google Play Store	9f9e501d-1d8f-4991-b1fa-6df0c3afaa3f	Good	Jaffar Khan	##########			0	en	us		5	en	good	Positive	0	0	0
Google Play Store	a0936e87-3a58-4b3e-b9f9-9563ae520bb3	Nice App Liked	Shahid Hussain Official	##########			0	en	us		5	en	nice app like	Positive	0	0	0
Google Play Store	40351fa6-4ff2-4af0-a1cd-0fbeda95c745	Now the apps are very slow.	Jaz_4fun	##########			0	en	us		2	en	apps slow	Negative	0	0	1
Google Play Store	1c001e66-f9ed-4e8b-bfa5-f6f9abd2dea3	Nice app	nadeem muhammad	##########			0	en	us		5	en	nice app	Positive	0	0	0
Google Play Store	7c8d6fea-e7df-421f-bcf9-2bf19e4bc652	Excellent	Feliciano Rendon Jr.	##########			0	en	us		5	en	excellent	Positive	0	0	0
Google Play Store	ef531e8c-920f-4e8f-8d72-b57dbbdfc2bc	Wow nice Banking system	saiful Islam Ontor	##########			0	en	us		5	en	wow nice bank system	Positive	0	0	0
Google Play Store	9668c594-8d86-45c1-8f05-b1cf9770b4f9	Very good service	abu Ali	##########			0	en	us		5	en	good service	Positive	0	0	0
Google Play Store	c63de903-b03b-4364-8557-a2d384f24613	Good	Ashok Kumar	##########			0	en	us		5	en	good	Positive	0	0	0
Google Play Store	ece7cb9d-06a0-443b-9516-625e145893df	Very nice application, Thank you Al Jazirah bank IT team.	Saad Hasan	##########			0	en	us		5	en	nice application thank al jazirah bank team	Positive	0	0	0
Google Play Store	0936797f-6fc1-4bdc-82e8-aa71ab0d68e6	Good	Syedqadir Qadir	2023-05-04 09:37:00			0	en	us		5	en	good	Positive	0	0	0
Google Play Store	df4e1e8b-3d23-4867-b40e-b5b476aeafb3	Good but very slow while add beneficiary. Must be improved.	Mere Mahboob	2023-05-04 04:48:00			9	en	us		3	en	good slow add beneficiary must improve	Negative	1	0	1
Google Play Store	6b76464a-39af-4d29-8231-b1b65bb4e802	Very helpfull this App	Nabeel Hussain	##########			0	en	us		5	en	helpfull app	Positive	0	0	0
Google Play Store	119fe8e9-a950-4495-afe9-477cee25316d	Nice	WASIURRAHMAN SHEIKH	##########			0	en	us		5	en	nice	Positive	0	0	0
Google Play Store	17f73094-0c6a-4987-858a-c7743201de06	Thank you	Ahlam Majzoub	2023-05-03 08:44:00			0	en	us		5	en	thank	Positive	0	0	0
Google Play Store	39e5c182-0ee8-419b-a8d2-49bc94dcefb9	Good and Nice app. Easy to use and big benifir of Fawry application also can be used. Good rate for international transfer.	Mobeen Zia	2023-05-03 08:18:00			18	en	us		5	en	good nice app easy use big benifir fawry application also use good rate international transfer	Positive	0	0	0
Google Play Store	c2cab0bb-bcf2-432f-a359-beb9dbcd2b40	Very good application	shamim hossain	2023-05-03 06:52:00			0	en	us		5	en	good application	Positive	0	0	0
Google Play Store	05878338-b776-4986-a516-74ee595e9511	Excellent App	Javed Ahmed	2023-05-03 03:35:00			0	en	us		5	en	excellent app	Positive	0	0	0
Google Play Store	c308e0bb-c87e-4cc8-8b20-7043a508f0ec	Good work aap 👍	Abdul Kareem	2023-05-03 02:07:00			0	en	us		4	hi	good work aap	Positive	0	0	0
Google Play Store	11315e72-dc95-45f2-b89f-f96a5f9c10c8	Can not issue new debit card from app waste no use.	Syed mahboob Ali	2023-05-02 06:03:00			0	en	us		1	en	issue new debit card app waste use	Negative	0	1	0
Google Play Store	d9cef2c3-4d70-4e43-9b35-97684b3bcab6	Very nice	Jamshed Jani	##########			0	en	us		5	en	nice	Positive	0	0	0
Google Play Store	c5d8514d-de1c-4ccf-a35e-f72f206a6816	Cannot activate ATM card	Kalander Shahul	##########			0	en	us		2	en	activate atm card	Neutral	0	1	0
Google Play Store	0a7d33b9-8049-485a-b46b-be6da8352347	Excellent work	Rafiq Hossain	##########			0	en	us		5	en	excellent work	Positive	0	0	0
Google Play Store	34ca3469-b019-4409-9ebb-d11ee0744e81	Awesome job and I am very disappointed in the way of updating the account per month end and the only way update is to go to the bank directly to get better information about it and hope to upgrade the program to the application as soon as possible	Amjad Khan	##########			0	en	us		5	en	awesome job disappoint way update account per month end way update go bank directly get good information hope upgrade program application soon possible	Negative	1	0	0
Google Play Store	7e18c709-716d-4c5e-ac22-9a999d33701d	Excellent	Rolando De villa	##########			0	en	us		5	en	excellent	Positive	0	0	0
Google Play Store	dcc6d1c3-f292-4629-96a0-6b9b65cf243b	App is good, easy to use, minimal or no bugs, I hope it stays like this or improve more	Maher Alabdulkarim	##########			11	en	us		4	en	app good easy use minimal bug hope stay like improve	Positive	1	1	0
Google Play Store	dd4c2966-3d55-450f-94ae-2e5599c6878d	This world baddest app . Only I can show my Bank balance . Add Beneficiary option not work.	Uday pratap Nishad	##########			0	en	us		1	en	world baddest app show bank balance add beneficiary option work	Negative	1	1	0
Google Play Store	b7955163-76ed-43d5-bcba-9a2ac0da3fb6	Ex	Mohammad isteyaque Alam	##########			0	en	us		5	en	ex	Neutral	0	1	0
Google Play Store	4429cdf9-b345-4897-8f0e-905825960644	Im so disappointed why always theirs an issue for sending a money or depositting a money. Like pending, wrong bank account even i check how may times before i send it. Did not recieve money even it already confirmed i deposit the money on the ATM. Please fix your services especially on online apps for sending.	Cze Jee	##########			17	en	us		3	en	im disappoint always issue send money depositting money like pending wrong bank account even check may time send recieve money even already confirm deposit money atm please fix service especially online apps send	Negative	1	1	0
Google Play Store	b250be13-4b0a-4507-ac28-5166f37f0ad7	For my own opinion this application is good for me.. No hassle if you want to deposit the money.	Arnel Delena	2023-04-06 03:18:00			0	en	us		5	en	opinion application good hassle want deposit money	Positive	1	0	0
Google Play Store	7ebdb843-cc86-4bca-9e6e-1de986521bcd	Good	attaullah qurashi	2023-04-06 01:50:00			0	en	us		5	en	good	Positive	0	0	0
Google Play Store	62ac8c9f-00e7-4f27-b51b-fee3467cdfc5	Not open apps	Rakib Khan	##########			0	en	us		1	en	open apps	Neutral	0	1	0
Google Play Store	6af43839-945f-48fa-9eb7-68e84086ef25	Good work	abdul hameed	##########			0	en	us		5	en	good work	Positive	0	0	0
Google Play Store	45ec941f-bda4-452a-a7c0-4d8bec0f8416	Worst Banking All I Have Ever Experienced Nothing Is Good In It I Can't Add Any New Benifieacery In Fawri It always says Technical Issue Try Again Later	Kaif Khan	##########			1	en	us		1	en	bad bank ever experience nothing good cant add new benifieacery fawri always say technical issue try late	Negative	1	1	0
Google Play Store	50eabf10-bff6-4909-ab56-62e52920a2df	It was good at first then its already 1 week that i can not enter..saying sorry for the inconvenience...what is this. ?? Try to find ways to fix this "inconvenience " matter of ur app	lyntot tot	##########			3	en	us		1	en	good first already week entersaying sorry inconveniencewhat try find ways fix inconvenience matter ur app	Negative	1	1	0
Google Play Store	45da6089-3166-4d2e-9a9b-f2903f63d845	Overall good app..but sometimes exchange rate not defined for international transfer	AR Engr Mamun	##########			2	en	us		4	en	overall good appbut sometimes exchange rate define international transfer	Positive	1	1	0
Google Play Store	e457317c-df0f-46ad-a1c3-f1732ef25aaa	Very good service 👍👍👍	Abdul Sattar	##########			0	en	us		5	en	good service	Positive	0	0	0
Google Play Store	6c391a25-4882-44c6-8f97-fe1355910521	im just wondering how my current account is blocked in 3 days since i create the apps..and next day 5 days my debit card is arrived on time..but i wish my current account could be unblock.meaningless if al jazera would not unblock my acount its useless my debit card...whats the purpose of block my current account?	Ric tamanu	##########			0	en	us		3	en	im wonder current account block days since create appsand next day days debit card arrive timebut wish current account could unblockmeaningless al jazera would unblock acount useless debit cardwhats purpose block current account	Negative	1	1	0
Google Play Store	f7561e12-e2ef-4a70-863e-ca04d0d905fd	Doesn't work	Baraa Aljouri	##########			0	en	us		1	en	doesnt work	Negative	0	1	0
Google Play Store	b99d1a47-c75c-4ef6-9f15-f244ba42f534	Not open account	Haneef Sarwar	##########			0	en	us		1	en	open account	Neutral	0	1	0
Google Play Store	42a37294-5872-430a-b905-1f35f9268b72	Excellent banking apps but I like it this Al Jazeera Bank	MA ALAMGIR MOZUMDER	##########			0	en	us		5	en	excellent bank apps like al jazeera bank	Positive	0	0	0
Google Play Store	f4e4bf0d-52fd-4961-9f56-e0ec4f3117aa	Experience good But please help me IBAN number not showing this app Please do something	javed ahmed	##########			0	en	us		5	en	experience good please help iban number show app please something	Neutral	1	0	0
Google Play Store	ba184c9d-9375-4102-a9c0-9224e97ed4d1	Good	Sajid Awan	##########			0	en	us		5	en	good	Positive	0	0	0
Google Play Store	536dd98d-bad3-49e6-95a1-4b4b4cd6ffba	Good service	Vineeth Krishna	2023-03-02 07:21:00			0	en	us		5	en	good service	Positive	0	0	0
Google Play Store	f17b115f-9bb3-482f-968b-aa66da7e5f8c	Marvelous work than expected but I hope that transaction services should be more effective in times of urgent need of help	PSYCHOSINGLE UNITED	##########			0	en	us		5	en	marvelous work expect hope transaction service effective time urgent need help	Positive	1	1	0
Google Play Store	2d17bd62-078c-4ca2-a8bc-5948ae5a8992	Server Not good very weak	Faiyyaz Khan	##########			0	en	us		1	en	server good weak	Negative	1	0	0
Google Play Store	ec6de9fa-d1a8-4eec-9c73-7653daf10e1e	Eyes	mera sohna panjab4	##########			0	en	us		5	en	eye	Neutral	1	0	0
Google Play Store	dde175ba-71d6-4b96-a729-3b61c430bdab	Nice	Rashid Latif	##########			0	en	us		5	en	nice	Positive	0	0	0
Google Play Store	bef0bae2-002e-4f0c-a032-8cbe1f443e5d	Improve finger print logins	man in the middle	##########			0	en	us		1	en	improve finger print logins	Neutral	0	1	0
Google Play Store	2b4cf658-0549-4d2e-84bb-0e807172fd17	Thank you so much everything is fine one of the best online services in AL JAZEERA BANK in Saudi Arabia	A.BARAKATH ALI RMA	##########			0	en	us		5	en	thank much everything fine one best online service al jazeera bank saudi arabia	Positive	0	0	0
Google Play Store	ac7d80bc-9829-40b7-b8d5-188afb422938	Very good	Mohammed Irfan	##########			0	en	us		4	en	good	Positive	0	0	0
Google Play Store	f6f6dfe3-9498-4ea6-bb3d-deda14d4c5dd	This application is not logging in since last week	Zawar Hussain	##########			0	en	us		1	en	application log since last week	Negative	0	1	0
Google Play Store	f9eacdf0-0d98-4b16-9221-296e85113e14	Good	TOHIDUR RAHAMAN	##########			0	en	us		5	en	good	Positive	0	0	0
Google Play Store	fea31b36-a2c6-447a-9247-28c35f0d5c05	I having issue to add international beneficiary accounts when I go to add beneficiary branch code of account so beneficiary branch code not doing add ,so plz solve this issue.	Hanif Khan Pathan	##########			1	en	us		1	en	issue add international beneficiary account go add beneficiary branch code account beneficiary branch code add plz solve issue	Negative	0	1	0
Google Play Store	5b2db09b-b2ff-4526-a61d-cf506ee5b689	Good App	Zeeshan Malik	##########			0	en	us		5	en	good app	Positive	0	0	0
Google Play Store	3b0ce4a3-432b-40a2-a9ba-7d48fa30d01e	Very easy to comply That's five star	Ahmad Jammang	##########			0	en	us		5	en	easy comply thats five star	Positive	0	0	0
Google Play Store	b20f8e16-628d-404f-8678-4a0333f6435a	Very good Aplication	Muhammad Bilal	##########			0	en	us		5	en	good aplication	Positive	0	0	0
Google Play Store	34c77a3d-d407-4b54-9e9d-6315415c7dfe	Uninspected that can not send due to reaching the max transaction in this app. The question is why.	Eric Inchan	##########			0	en	us		2	en	uninspected send due reach max transaction app question	Negative	0	1	0
Google Play Store	e605ddda-caed-4176-b089-1dd79da2b3c1	unable to update ID date ghrough app or 🏧 same issue last year poor management, always bad experience .	Rahim Awan	##########			5	en	us		1	en	unable update id date ghrough app issue last year poor management always bad experience	Negative	1	1	0
Google Play Store	5f894393-3289-44ee-a989-62761cd23ae2	Better	Dics Kims	2023-01-06 05:36:00			0	en	us		5	en	good	Positive	0	0	0
Google Play Store	8a792fd2-831c-4bcd-8b6a-4540e369c90e	Very easy to use, good banking. Online banking system is too easy.	fazl e haq hamdard	##########			12	en	us		5	en	easy use good bank online bank system easy	Positive	0	0	0
Google Play Store	b57687aa-2ee5-4003-ab97-b5f685a86184	Worst service! local & international transfer is so late	Essu Bro	2023-01-05 09:36:00			1	en	us		1	en	bad service local international transfer late	Negative	1	1	0
Google Play Store	381b64d6-35b1-4717-9a6f-8ed87d4f58cc	Very good	woodworking all kinds of woods	##########			0	en	us		5	en	good	Positive	0	0	0
Google Play Store	b26933b1-481a-4c6a-9ab5-b82579798140	SADAD stc pay doesn't work. It shows invalid number. Before every month it worked now says invalid. SADAD pay and registration bug. Fix ASAP	jaycees chaudhary	##########			15	en	us		1	en	sadad stc pay doesnt work show invalid number every month work say invalid sadad pay registration bug fix asap	Negative	0	1	0
Google Play Store	66235922-f746-456c-b9f6-5b96ea5683ae	Can't send money. It always say obsolete data	Renante Reformado	2023-01-04 01:37:00			0	en	us		1	en	cant send money always say obsolete data	Negative	0	1	0
Google Play Store	2211f02c-b091-49eb-bdeb-cd51335623b9	I want to use this app plezs make essy for me	sozib shikder	##########			0	en	us		5	en	want use app plezs make essy	Positive	0	0	0
Google Play Store	7c707b50-6d0c-404e-9159-04195d0df12b	Perfect app for sending money to my family!!! I would like to recommend all of people living in KSA to use this app to send the money to your family. It's easy to use & exchange rates are also best to other banks.	Muhammad Shahid Iqbal	##########			0	en	us		5	en	perfect app send money family would like recommend people live ksa use app send money family easy use exchange rat also best bank	Positive	0	0	0
Google Play Store	5aff3c06-15d4-44ef-89ae-9b2e4ca021b7	Good App Store but some time slow as usual the others too.	Tariq Arifi	##########			1	en	us		4	en	good app store time slow usual others	Positive	1	0	1
Google Play Store	46f277ae-1e94-4833-af5f-55e7fc0dafb6	Great*Happy New Year*2023*	Orogan Larry	##########			0	en	us		5	en	greathappy new year	Positive	0	0	0
Google Play Store	9b5dec7d-d69a-41c0-8c8f-5f49640561e4	Good	Farman Ali	##########			0	en	us		5	en	good	Positive	0	0	0
Google Play Store	33518f3a-ba1f-4229-8e50-4258e7865238	Gud	Abdul Gufar	##########			0	en	us		5	da	gud	Positive	0	0	0
Google Play Store	22729eec-5ab5-4341-88e4-07f10ecb0d8b	Not working creating account putting user name and password cannot proceed to the next. I try it two times	Cruel Mobile Gaming	##########			2	en	us		1	en	work create account put user name password proceed next try two time	Negative	0	1	0
Google Play Store	d9fd1864-296d-4bc7-8ada-c17405424dc5	Excellent service	Ghulam Asghar	##########			0	en	us		5	en	excellent service	Positive	0	0	0
Google Play Store	4059255b-4c1e-4a39-9837-b35eb0288996	I'm satisfied with this apps, very helpfull for me, from Saudi-PHILIPPINES remittances, via FAWRI no hassle, thankyou😉😉	EVZ NIODA	##########			0	en	us		1	en	im satisfy apps helpfull saudiphilippines remittances via fawri hassle thankyou	Positive	1	0	0
Google Play Store	25821da2-d535-4950-b1a2-56d6b823de07	Good	Md Nohel Hosen (Nohel)	##########			0	en	us		5	en	good	Positive	0	0	0
Google Play Store	85619c64-beec-4a02-b5da-eb4e74600918	Ek number	nisar mehdi	##########			0	en	us		5	mr	ek number	Neutral	0	0	0
Google Play Store	7fcac527-8e43-4c90-911d-9dc305ea4d2b	Very Good app	M ASHRAF GORAYA	##########			0	en	us		5	en	good app	Positive	0	0	0
Google Play Store	d9f3cef4-3146-430c-8544-917bafcc0fba	Good 👍	Sita Ram	##########			0	en	us		5	en	good	Positive	0	0	0
Google Play Store	daf36af8-6386-4ec9-a6f7-d5c644d22147	Good	Muhammad Touqeer	##########			0	en	us		5	en	good	Positive	0	0	0
Google Play Store	b104732d-e759-4a64-bb20-27cbcbddbb53	Good service 👍👍	IMRAN HASAN	##########			0	en	us		5	en	good service	Positive	0	0	0
Google Play Store	9d7ca8d5-71f8-4b5e-9986-66c7bc5bfd3f	Nice	md shams	##########			0	en	us		5	en	nice	Positive	0	0	0
Google Play Store	f8686a71-4025-4397-a79d-4efd45fe2808	please help i cant find my trusted device on my online account al jazera smart im having hard time and in my online theres no any registered sonuts hard to remove!	Ate Melay	##########			0	en	us		2	en	please help cant find trust device online account al jazera smart im hard time online theres register sonuts hard remove	Negative	0	1	0
Google Play Store	911c5b21-e39e-488c-adbe-2df7b3ec13a4	This app is the best .	Tendo Gloria Frexier	##########			0	en	us		5	en	app best	Positive	0	0	0
Google Play Store	2b5cf8c3-8bf9-4e5c-85c7-baf86419cb1d	When I register the Fawri apps then logout	ARSHAD MANIK	##########			0	en	us		3	en	register fawri apps logout	Neutral	0	1	0
Google Play Store	31de75c1-a8c9-4c9c-b9e8-679ef6d08838	Good services I am satisfied	Muhammad shakeel Haider ali	##########			0	en	us		5	en	good service satisfy	Positive	0	0	0
Google Play Store	bb47f513-5b92-40b9-9a25-8c201bc84b60	Always Send Online by this Apps🇸🇦🇵🇭💐💐💐	jimmy 20	##########			0	en	us		4	en	always send online apps	Positive	0	1	0
Google Play Store	bbe1264b-0efe-4399-b45a-f5004a311828	Very good bank app	Aqeel Ahmad	##########			0	en	us		4	en	good bank app	Positive	0	0	0
Google Play Store	363af883-ff18-4b06-a346-4710a228da36	Very good	Malik Zafar	##########			0	en	us		5	en	good	Positive	0	0	0
Google Play Store	cdefc93f-f045-4962-8603-7fa0dc39c0d0	Excellent	Mark Anthony Javero	##########			0	en	us		5	en	excellent	Positive	0	0	0
Google Play Store	ae7cd8ac-572d-4203-b31e-b5be0bf3d75a	Worst Bank and online E-site & App service! Unable to add International Beneficiary & local transfer.! Even after updating app,No gain. Trying since 7days. Couldn't able to add new beneficiary.	atif ansari	##########			12	en	us		1	en	bad bank online esite app service unable add international beneficiary local transfer even update appno gain try since days couldnt able add new beneficiary	Negative	1	1	0
Google Play Store	f35bf5c7-5e82-4ad0-bc34-7c9b404e330c	Amazing app	Haider Ali Khan	##########			0	en	us		5	en	amaze app	Positive	0	0	0
Google Play Store	ccbc8f64-fe25-42c3-9a56-298cbec9678a	Can't add Ben code in fawri "SBI" account in India it shows not available	Rahul Krishna Singh	##########			0	en	us		1	en	cant add ben code fawri sbi account india show available	Neutral	0	1	0
Google Play Store	efac6485-ecc2-4869-9c24-7c7d38e6d875	Good	Ghulam Abbas	##########			0	en	us		5	en	good	Positive	0	0	0
Google Play Store	75a15e08-dcc1-45c3-b699-b265b1170033	Good sarvis	Hasib Ansari	##########			0	en	us		5	hi	good sarvis	Positive	0	0	0
Google Play Store	fd6398ab-87c2-45b2-b5a4-ad88a916dde0	i am so very satisfied this online money remittance. to the management of this online remittance thank you for making us to used this your app very convenient and easy to used.	إليمار	##########			13	en	us		5	en	satisfy online money remittance management online remittance thank make us use app convenient easy use	Positive	0	0	0
Google Play Store	f3c7b90c-8bf9-448d-bc59-a8b6d0ce9b68	Nice	Mizanur Rahaman	##########			0	en	us		1	en	nice	Positive	0	0	0
Google Play Store	584b38c6-0618-4738-8206-363e0964c7ef	welcome to everyone whom like to used baj fawri apps (aljazira smart) .. be smart always smart..all the best wishes and succeeded. Marketing promoter Shahidullah Bin Abdul aziz fawri..all nations	SHAHID ULLAH	##########			0	en	us		5	en	welcome everyone like use baj fawri apps aljazira smart smart always smartall best wish succeed market promoter shahidullah bin abdul aziz fawriall nations	Positive	0	0	0
Google Play Store	cb8aee15-f9a4-443d-a7c6-0526a55703f1	Friendly	Abdulrahman Abusanenah	##########			0	en	us		4	en	friendly	Positive	0	0	0
Google Play Store	66033992-ac60-4d52-a78e-8754b958bb7f	Good	Sahib Muhammad	##########			0	en	us		5	en	good	Positive	0	0	0
Google Play Store	c2f773a7-6388-4f65-8bbf-ce90c3760c7e	very good service	Syed Faheem	##########			0	en	us		5	en	good service	Positive	0	0	0
Google Play Store	d91f071a-a695-4e37-b1c9-c1226149e4dc	Nice Application	Mudaser Liaquat	##########			0	en	us		5	en	nice application	Positive	0	0	0
Google Play Store	cbec88fe-d91c-49d5-ad7b-3fb1a565c9c1	Ok	Mramzan faqeer	##########			0	en	us		5	en	ok	Positive	0	0	0
Google Play Store	99993d13-6691-476f-af97-77024c20a245	It's very helpful app for transfer money to my family	Ansar Iqbal	##########			0	en	us		5	en	helpful app transfer money family	Positive	1	0	0
Google Play Store	30cbac4a-49fb-48bb-8d3d-15ba5a116cec	Good	Asif Ali	##########			0	en	us		5	en	good	Positive	0	0	0
Google Play Store	babdee02-c4b3-4b07-89af-f5133ad243fa	Good	amjad mahmood	##########			0	en	us		5	en	good	Positive	0	0	0
Google Play Store	5914493c-2a0f-4901-a5c8-d9cdddea077d	You must go to the fawari branch to continue the online transaction,so I am not satisfy	Ramakrushna Behera	##########			0	en	us		3	en	must go fawari branch continue online transactionso satisfy	Neutral	0	1	0
Google Play Store	b179020f-2564-479c-866e-6f7894a67822	Nice	Muhammad Sheryar	##########			0	en	us		5	en	nice	Positive	0	0	0
Google Play Store	4f73da2b-a53f-4de3-aa29-28d9297d6297	Good	Nayeem Dhali	##########			0	en	us		5	en	good	Positive	0	0	0
Google Play Store	0a8ea6ce-b6e6-4745-951e-10f43a7ac798	Nice application	Ijaz Ahmed	##########			0	en	us		5	en	nice application	Positive	0	0	0
Google Play Store	87fa10a0-f261-448a-9a3a-11168ff3aa75	Very bad app	hydrabad Khann	##########			0	en	us		1	en	bad app	Negative	1	0	0
Google Play Store	cb3e54ea-82f7-4495-8e5a-8647d9fbaaa8	Good	Sudheer Sudhina	##########			0	en	us		5	en	good	Positive	0	0	0
Google Play Store	db8819b4-a63f-497d-aa63-b236f5526044	Excllant	Khalid Farooq	##########			0	en	us		5	es	excllant	Positive	1	0	0
Google Play Store	0c968a96-d05a-46f7-b6f3-b7ccc5cdfcbd	Convenient apps	Joseph Falconitin	##########			0	en	us		5	en	convenient apps	Positive	0	0	0
Google Play Store	6c37a9a2-dfae-4b55-bfa3-003fd2164f81	Good	Munim Sarowar MamuN	##########			0	en	us		5	en	good	Positive	0	0	0
Google Play Store	83a31e93-f6f9-4708-89b8-1074ae6e73a2	Worst app ever	Saif Cholayil	##########			0	en	us		1	en	bad app ever	Negative	1	0	0
Google Play Store	d62fdb89-b6ed-4863-924b-765557a852f2	Nice app	Khan G	##########			0	en	us		4	en	nice app	Positive	0	0	0
Google Play Store	1b095640-6280-4aa0-a950-728e4763b110	Why u not allowing mobile recharge throw this app..?	Shareefurahman Naanisanu	##########			0	en	us		2	en	u allow mobile recharge throw app	Negative	0	1	0
Google Play Store	e56f5fae-e63b-4456-9693-9459ddb0cee3	Super	gul sher	##########			0	en	us		5	en	super	Positive	0	0	0
Google Play Store	08aeef46-2862-458d-9624-c0a528c28a0e	Worst experience ever	afaq beig	##########			0	en	us		1	en	bad experience ever	Negative	1	0	0
Google Play Store	affbdd35-9cb8-431a-9c6a-2a1d7cfdbc2e	Unable to add beneficiary accounts of State Bank Of India. Please solve this quickly	Ashish Madhukar	##########			0	en	us		4	en	unable add beneficiary account state bank india please solve quickly	Negative	0	1	0
Google Play Store	b2b27482-428f-4725-8be1-71d588a9c4f3	New	Mujeeb uddin Mujeeb uddin	##########			0	en	us		5	en	new	Neutral	1	1	0
Google Play Store	44ae96a7-a0be-4256-862a-4b83beb7a269	excellent	charm ibalan	##########			0	en	us		5	en	excellent	Positive	0	0	0
Google Play Store	a23ac8c2-7003-45d3-952b-258132edeed6	Not showings "FAWRI"in jazira mobile app and web. what happend ??	hashiM Nisthar	##########			1	en	us		1	en	showings fawriin jazira mobile app web happend	Negative	0	1	0
Google Play Store	576d8b91-fe1f-414a-80b5-b84ce80b235f	Fawri is not available in this app now. What is the new update as there is no prior info provided by your end. Please assist	Bira Waseem	##########			1	en	us		4	en	fawri available app new update prior info provide end please assist	Negative	0	1	0
Google Play Store	5e2f06ef-590e-4841-b158-f44d25fd4866	Aljazira Bank Is Very Simply International Transaction Mobile App To much Helpfull And No Waste Our Time Thank You Aljazira	Ghalib janjua	##########			0	en	us		5	en	aljazira bank simply international transaction mobile app much helpfull waste time thank aljazira	Positive	0	0	1
Google Play Store	6c25d4aa-e01e-4dcf-8eba-d4ba48fe03de	i tried many times to transfer money to philippines using aljazira smart app but it says obsolete data found? what does is mean by that? and this is the first time it happen	shirley fontanilla	##########			17	en	us		1	en	try many time transfer money philippines use aljazira smart app say obsolete data find mean first time happen	Negative	1	1	0
Google Play Store	201430a4-8f72-4e8c-8eb4-3ae48b6c2cec	Solved the issues. Great app	Ahmad Al-otaibi	##########			4	en	us		5	en	solve issue great app	Positive	0	0	0
Google Play Store	8cac3bcf-4947-4016-b698-8caf197929ea	It is a fantastic app and very helpful to me I just deposit my money into my account and send money through app. Please try and add other money transfers like transfast money transfer 🙏 🙂. Thank you	Mamduhu Yunusah	##########			21	en	us		5	en	fantastic app helpful deposit money account send money app please try add money transfer like transfast money transfer thank	Positive	0	0	0
Google Play Store	fff0d84f-7738-4010-ae1d-63da40d1de31	Nice	V.K Mishra	##########			0	en	us		5	en	nice	Positive	0	0	0
Google Play Store	dd7e683a-1375-43cd-a6bb-a2c4856ae9b2	Nice interface and light	Hisham Allop	##########			0	en	us		5	en	nice interface light	Positive	0	0	0
Google Play Store	67bb1aa6-6499-493b-925b-452c473cb94d	Very happy	Tim Alma	##########			0	en	us		5	en	happy	Positive	0	0	0
Google Play Store	9c5a2ad9-4612-446d-ae9a-5d3fb59ef3db	I like this app	MAHTAB ALAM	##########			0	en	us		5	en	like app	Positive	0	0	0
Google Play Store	f1e0a0fd-cc93-44ab-a6a6-49a1ce92e139	Worse then ever use go through others Or Learn from Indian banks how smoothly they run bank apk	Ghufran Ansari	##########			0	en	us		1	en	bad ever use go others learn indian bank smoothly run bank apk	Negative	1	0	0
Google Play Store	a188329c-7f17-45cd-83af-011e9587b30f	Super good...	Mohamed Asif	##########			0	en	us		5	en	super good	Positive	0	0	0
Google Play Store	5d8a4c9f-dda5-4b37-bdef-907f20f6a083	Good 👍	ABDUL QUADIR	##########			0	en	us		4	en	good	Positive	0	0	0
Google Play Store	1881311f-490b-4983-8673-2c67beb79892	Good	Salman khah (Sumon)	##########			0	en	us		5	en	good	Positive	0	0	0
Google Play Store	f3896743-acb6-4ed6-8909-d26ddfb13fa5	Nice	Hafiz Abdallah	##########			0	en	us		5	en	nice	Positive	0	0	0
Google Play Store	b6c2506a-c0ba-491e-a241-7c6a9a370028	Gud	Gayyur Ali	##########			0	en	us		5	da	gud	Positive	0	0	0
Google Play Store	24486100-6572-414a-89b1-3259797f3a8f	Good	tilak subedi	2022-08-05 09:14:00			0	en	us		5	en	good	Positive	0	0	0
Google Play Store	c3133ace-d46f-4c65-a3d4-ec6f1bf986cc	Very good	Kousir Kousir	2022-08-05 08:13:00			0	en	us		5	en	good	Positive	0	0	0
Google Play Store	bd90d725-049c-450e-af12-ebaa12ced947	i am not able to add fawri beneficiary through application. it freezes and automaticlly closes after adding nationality..i have tried this in ios and android both are same.. its a bug and need to be resolved ...	Sachin Nair	##########			0	en	us		1	en	able add fawri beneficiary application freeze automaticlly close add nationalityi try ios android bug need resolve	Negative	0	1	1
Google Play Store	d96d5ff2-9885-4ba0-8d30-a5f627831bb0	Good experience	Malik Muarrij	##########			0	en	us		5	en	good experience	Positive	0	0	0
Google Play Store	cdf4dd56-5572-4264-932d-5fcc94a2e1a3	I am trying since 5 days, day and night to add state bank of india beneficiary I can't as it get hanged up at enter branch code please resolve asap or else I had to look for other options. Please do the needful on urgent basis as need send money for monthly maintenance.	Ibrahim's Innovation's	##########			2	en	us		1	en	try since days day night add state bank india beneficiary cant get hang enter branch code please resolve asap else look options please needful urgent basis need send money monthly maintenance	Negative	0	1	1
Google Play Store	dffe54a1-289d-46f1-814d-15b97b6ed072	Naeic	Rashid tum bin Koch nae	##########			0	en	us		5	ga	naeic	Neutral	0	0	0
Google Play Store	b0feb684-2cc1-4a08-973f-ffa9dfbb95af	Good	Aadil Khan	##########			0	en	us		2	en	good	Positive	0	0	0
Google Play Store	e1d97e2d-fba9-47dd-86fb-729a8020c1d9	Nice app	সুমন শেখ	##########			0	en	us		3	en	nice app	Positive	0	0	0
Google Play Store	cb2f2bb5-9b44-4423-a795-d2c5ce33fdbb	Customer service very poor Calling center people have no experience Very very bad service Just only know. Go branch 😂😂😂	Ali BIDASAR	##########			6	en	us		1	en	customer service poor call center people experience bad service know go branch	Negative	1	0	0
Google Play Store	2f02d7a9-266c-41d9-85b3-c41d2c6a822c	I can't open the apps... What thw problem??	Hazel Villanueva	##########			0	en	us		1	en	cant open apps thw problem	Negative	0	1	0
Google Play Store	f58dd3c1-0df6-4736-a2b8-6cbd1fee5df2	Thanks, pls add replace and re issuance of debit card option as you have for credit card in app.	Mahboob Ali	##########	Dear customer, we thank you for your trust and always pleased to best serve you.	##########	3	en	us		2	en	thank pls add replace issuance debit card option credit card app	Neutral	0	1	0
Google Play Store	08158874-0a55-45b5-bc75-5980a2fc1667	Tried to fill the details but getting lack getting hanged on second page.tried many times.thought instead of going bank I'll send money via this app.but i think it is waste of time and energy for me.useless app	Shaukat.shaikh 8976232275	##########			9	en	us		1	en	try fill detail get lack get hang second pagetried many timesthought instead go bank ill send money via appbut think waste time energy meuseless app	Negative	1	1	1
Google Play Store	aa09ba60-5780-46fe-91e5-4cf0601851e6	Good 👍 service 👏	Sajid Shah	##########			0	en	us		5	en	good service	Positive	0	0	0
Google Play Store	1115fe5f-b6d7-4032-9113-8d187a80ba69	This apps always have issues canot connect	Vincent Omandam	2022-07-01 07:55:00			0	en	us		1	en	apps always issue canot connect	Negative	0	1	0
Google Play Store	4d2abcec-c121-48f4-97a1-4c1151d29715	Nc	Muhammad Asif Khan Kiani	##########			0	en	us		5	en	nc	Neutral	0	0	0
Google Play Store	aa913e5e-fb34-4105-9548-5e5ccdf440c1	nice	Mehrab Hossain	##########			0	en	us		5	en	nice	Positive	0	0	0
Google Play Store	2f756f54-2754-448c-9c99-8a56be4944f0	Good	MOHAMED BASHEER	##########			0	en	us		5	en	good	Positive	0	0	0
Google Play Store	9097e34c-7a37-447c-83b5-bca1fb717eb9	Good 👍	Md Arif A N	##########			0	en	us		4	en	good	Positive	0	0	0
Google Play Store	ac9ae8b0-57cd-487d-a39a-2ac8a39a9700	Good experience in Al jazira	Siraj Alam	##########			0	en	us		5	en	good experience al jazira	Positive	0	0	0
Google Play Store	fa6ed1e6-09b4-450c-99e6-a5b2513c924b	2 years	baba khandagale	##########			0	en	us		5	en	years	Neutral	0	1	0
Google Play Store	59cd267d-079c-49fc-8492-39a9e6a69d8b	Super	amjad Ali	##########			0	en	us		5	en	super	Positive	0	0	0
Google Play Store	26451fe8-3d1c-4c17-b7cc-9605e7caa744	superb	Mike Pineda	2022-06-09 01:40:00			0	en	us		5	en	superb	Positive	0	0	0
Google Play Store	1fff0f05-10e7-42f3-8dca-b4a4ce8c7170	Excellent	Kabeer Hussain	2022-06-02 03:16:00			0	en	us		5	en	excellent	Positive	0	0	0
Google Play Store	51a6f8c0-b113-4885-b21f-e6b6bd125c0a	Very good	Suman Malla	2022-06-01 05:27:00			0	en	us		4	en	good	Positive	0	0	0
Google Play Store	b6e98776-dbd4-40e7-b8c1-9caf7eaad6be	Why there is no option to ADD MONEY easily using other banks debit cards like is stc pay?	Abdul Gafoor	##########			0	en	us		1	en	option add money easily use bank debit card like stc pay	Negative	0	1	0
Google Play Store	c2b4638e-db26-472c-bea0-fbfc69bc9b02	Very bad experience	Sharjeel Ahmed	##########			0	en	us		1	en	bad experience	Negative	1	0	0
Google Play Store	a6dd9437-14f7-4a95-9508-4d537f9c5388	nice	Suruj Bhai	##########			0	en	us		5	en	nice	Positive	0	0	0
Google Play Store	b0178336-ee7b-40de-b1c7-41cea9a26f95	Very very very BAD service	Roxy khan	##########			0	en	us		1	en	bad service	Negative	1	0	0
Google Play Store	33a53b4a-bff4-4b6f-8e2b-1749c94df316	Not really good	Faisal Alzamel	##########			0	en	us		3	en	really good	Negative	0	0	0
Google Play Store	ac84fc78-43c6-43c6-843c-123c8ed7e42f	Good jod	hafiz sindhi	##########			0	en	us		1	en	good jod	Positive	0	0	0
Google Play Store	1169eceb-be94-4a45-971b-a9e7bc69fe60	Make upgrade your system or apps very not useful very disappointed	Danilo Tosco	##########			0	en	us		1	en	make upgrade system apps useful disappoint	Negative	1	0	0
Google Play Store	e3857f92-10a6-4ed1-8a74-e8cd9a1cb446	Excellent App and i never face any login or other issue.	Rupali Charpe	##########			3	en	us		4	en	excellent app never face login issue	Positive	1	1	0
Google Play Store	d94f608a-28e5-4131-a3c6-3bf713b3e387	The recent update made the app very slow and i am getting connectivity Error. Note 10 Plus android 12	Muhammad Yaseen	##########			3	en	us		3	en	recent update make app slow get connectivity error note plus android	Negative	0	1	1
Google Play Store	9a301e1a-d3fd-45ca-9d5b-01ab9e3074ee	Very nice	Javed Ahmad	##########			0	en	us		5	en	nice	Positive	0	0	0
Google Play Store	e10e2f4a-bbb5-454a-ace9-679903c7a4a1	This application is so good and very easy to send money for my family	Michael Quiazon	##########			0	en	us		5	en	application good easy send money family	Positive	0	0	0
Google Play Store	ad18f9a1-aaab-42f4-8631-d61da698c45c	Best app for send money	Mohammad Faij	##########			0	en	us		5	en	best app send money	Positive	0	0	0
Google Play Store	fe0422eb-f644-4a47-9494-02249e0864c1	yf8യ യു	Mrha Bikum	##########			0	en	us		3	ml	yf	Neutral	0	0	0
Google Play Store	06e88372-773c-4632-a8b8-20aae549ec12	Good	عبدالملك برهم	##########			0	en	us		5	en	good	Positive	0	0	0
Google Play Store	26fe0312-8be0-4e6d-8cf3-b6a575a75b43	good app	Faisal Gill	##########			0	en	us		5	en	good app	Positive	0	0	0
Google Play Store	2d8eb5de-0457-441e-8658-6c3975dadb77	Excellent	Ahmad Qararah	##########			0	en	us		5	en	excellent	Positive	0	0	0
Google Play Store	4ad3544f-9b1b-4810-ae84-f09aeb2258da	Very slow	I_am_Srk 03	2022-04-09 03:12:00			0	en	us		1	en	slow	Negative	0	0	1
Google Play Store	f8681321-d6ac-4f99-85e3-69ebed3d561f	Good service	Twin Galaxy	##########			0	en	us		5	en	good service	Positive	0	0	0
Google Play Store	6891a4e3-4f89-4e44-beba-f15d25d45f0d	Good	Sameer Uddin	##########			0	en	us		4	en	good	Positive	0	0	0
Google Play Store	54eeefd3-bb65-41df-a632-a0911a75b883	Good	Robian Naqua	2022-04-07 02:00:00			0	en	us		5	en	good	Positive	0	0	0
Google Play Store	6f424ea7-3725-473f-af02-001593e4aa31	Good	Elsa Palma	2022-04-07 01:03:00			0	en	us		5	en	good	Positive	0	0	0
Google Play Store	af23e727-844f-4eb3-9d92-9e142429faac	Now it is good and easy to do transactions.	alhaf malik	##########			7	en	us		4	en	good easy transactions	Positive	0	0	0
Google Play Store	a4232bf4-7682-4ee9-b473-94da7c08bac0	Unique app	قناة أبو معتز Abo Mutaz’s channel	##########			9	en	us		5	en	unique app	Neutral	0	0	0
Google Play Store	dcfccfcf-4335-4fac-8162-0ec3498debac	Ver god app	PRITING silk screen Mohammad Naushad	##########			0	en	us		5	en	v god app	Neutral	0	0	0
Google Play Store	f7cac23c-92d7-48e2-871f-ef89864afe04	Recently I transferred some amount 1000 rupees by using this App to India here they deducted service charges, when I checked the amount in my Indian bank it show 910 rupees. 90 rupees they deduct also from sum amount, can give the reason please.	Mirza Baig	##########			16	en	us		1	en	recently transfer amount rupees use app india deduct service charge check amount indian bank show rupees rupees deduct also sum amount give reason please	Negative	0	1	0
Google Play Store	298bea16-83b9-4aed-9ecc-a7702d61f462	Beest Aap is Verry Good aap	M Adnan Azeem	##########			0	en	us		5	hi	beest aap verry good aap	Positive	0	0	0
Google Play Store	32397804-5521-4aa1-829e-fbefaba42d70	Nice app	Ali Raza	##########			0	en	us		5	en	nice app	Positive	0	0	0
Google Play Store	4df7971f-4bd1-406c-8a89-f980b093ccdc	Works incredibly good	Risan Chaboi	##########			0	en	us		5	en	work incredibly good	Positive	0	0	0
Google Play Store	fbbbb582-0d7b-4f2b-943f-1d5b36d25582	Awesome service, no any hurdle. Really enjoying using this app, 1000 time better than NCB AHLI QUICKPAY.	Shoaib Shah	2022-04-04 01:41:00			0	en	us		5	en	awesome service hurdle really enjoy use app time good ncb ahli quickpay	Positive	0	0	0
Google Play Store	08340a52-7d96-4ade-b94e-73a2ca3b23b8	The bank is worst corporate we can't downlaod statemet in excel	Haris adil	##########			0	en	us		1	en	bank bad corporate cant downlaod statemet excel	Negative	1	0	0
Google Play Store	b2d54c85-972f-4b26-a8e3-6ce01eb41e7b	Good aplication	Abhishek Kumar (Abhi)	2022-04-03 01:36:00			0	en	us		5	en	good aplication	Positive	0	0	0
Google Play Store	3a3d90df-0336-4fd1-a265-a5544f76cfb0	Before I had problems to add beneficiary but when I was charged mobile now working properly	Mohammad Ahsan	##########			0	en	us		5	en	problems add beneficiary charge mobile work properly	Neutral	0	1	0
Google Play Store	4ffe2771-1a59-4064-82b2-f5948ff38d18	It's a very useful apps	filomeno timkang jr	##########			0	en	us		5	en	useful apps	Positive	0	0	0
Google Play Store	6fa4bad4-c1a2-4561-bde8-1534c2dd9e9a	this app is very good it make no problem	Zahid Hussain Bhatti	2022-04-02 07:27:00			0	en	us		5	en	app good make problem	Positive	1	0	0
Google Play Store	efc21c5c-a900-4d99-8219-b205222d34d1	best bank in KSA	faisal alam	2022-04-02 03:22:00			0	en	us		5	en	best bank ksa	Positive	0	0	0
Google Play Store	784f4166-dc1d-46c3-b0e1-397974a72d00	Very good	Asif Azmi	2022-04-02 02:22:00			0	en	us		5	en	good	Positive	0	0	0
Google Play Store	667875bb-7158-4422-9bd6-5d72dc00ece4	Excellent	Asif Ali	##########			0	en	us		5	en	excellent	Positive	0	0	0
Google Play Store	51011396-05c9-42f0-b17c-423fc402cf20	I like your online system	Noriel Aristorenas	##########			0	en	us		5	en	like online system	Positive	0	0	0
Google Play Store	0dde3ffa-c18d-4ed8-b90c-92c1417372df	Been using this app to transfer money for a year now, I have never faced any difficulty or lapse in services, keep up the good work.	Santosh Kotian	##########			14	en	us		5	en	use app transfer money year never face difficulty lapse service keep good work	Positive	1	1	0
Google Play Store	2a4c0f26-5493-4120-be19-0873aeace133	A wonderful app	Musab Hashim	##########			0	en	us		5	en	wonderful app	Positive	0	0	0
Google Play Store	72aa0429-9d3e-45c0-91e0-65286e7463f4	Good	Yellaji Rao	##########			0	en	us		5	en	good	Positive	0	0	0
Google Play Store	ac19d7b7-79fc-4674-ad91-cdeb09a6d368	App update karne se pahle Sahi chal rahi thi update karne ke bad app bilkul Nahin chal rahi kal say istmal kar raha hun Koi responce Nahin a Raha please make sure Karen aur app Ko Sahi Karen	Pak danting & Painting	##########			0	en	us		3	hi	app update karne se pahle sahi chal rahi thi update karne ke bad app bilkul nahin chal rahi kal say istmal kar raha hun koi responce nahin raha please make sure karen aur app ko sahi karen	Neutral	1	0	0
Google Play Store	a80484d0-fad2-4995-929b-dfdc5c360590	V v v good	Rana 2	2022-04-01 07:30:00			0	en	us		5	en	v v v good	Positive	0	0	0
Google Play Store	5dfd06e2-1a82-4b1f-b655-1f05ed1a6e71	Excellent	Muhammad Awais Riaz	##########			0	en	us		5	en	excellent	Positive	0	0	0
Google Play Store	25b18400-99be-45da-abc4-097e0ead4474	convenient	ASRHAP DANOS	##########			0	en	us		4	en	convenient	Neutral	0	0	0
Google Play Store	c8ca57b5-9620-48e2-b65e-d18f67ddbf45	Bank Account to be provided also credit card	Abdul Rahman	##########			0	en	us		5	en	bank account provide also credit card	Neutral	0	1	0
Google Play Store	f6ba7a37-c9df-4182-b43f-78055d35afaf	Good	Mubashar Khan Jadun	##########			0	en	us		5	en	good	Positive	0	0	0
Google Play Store	00673ee1-47ba-4a3e-a094-cbfc58b53886	What happened why i cant open the digital store.. please fix the problem asap badly need it	DESIREE'S Personalblog	##########			0	en	us		1	en	happen cant open digital store please fix problem asap badly need	Negative	0	1	0
Google Play Store	15cf433b-f073-41ad-9b88-3fb5f6b3451a	Exilent	jahngir kayani	##########			0	en	us		5	sv	exilent	Neutral	1	0	0
Google Play Store	e3960df6-cae8-442b-8198-dde2d1b0e46d	Good	V.n. Shehar	##########			0	en	us		5	en	good	Positive	0	0	0
Google Play Store	daeebd2c-92d0-4acf-aa69-bd9268145817	I think this is the best obsession for me	Walayat Hussian	##########			0	en	us		5	en	think best obsession	Positive	0	0	0
Google Play Store	9ea2dfb7-8884-4fae-b624-779fb135a7d0	Updated version is so bad...	Jayajith Thevalakkattu	##########			0	en	us		1	en	update version bad	Negative	1	0	0
Google Play Store	1fcc1b86-f4d9-4512-b930-664a6ac5982e	Very easy send money and cheaper than other app applications thank u so much....	Lily's Channel	##########			0	en	us		5	en	easy send money cheap app applications thank u much	Positive	0	0	0
Google Play Store	f1eb2ec6-a09d-47f8-add5-d574d194e86d	Very good services Ilove send money to Philippines	Carmie R. Santos	##########			1	en	us		5	en	good service ilove send money philippines	Positive	0	0	0
Google Play Store	21feec6b-682e-4957-9d16-b3aa17de6e05	Nice apps	Bossing Bravante	##########			0	en	us		5	en	nice apps	Positive	0	0	0
Google Play Store	44641e54-41bd-4d0c-b154-3efaf187ef62	Wow	Naveed Khan	##########			0	en	us		5	en	wow	Positive	0	0	0
Google Play Store	1b7e858a-02e0-486e-8880-59de242dbac4	Very friendly to use	Ameer Sab	##########			0	en	us		5	en	friendly use	Positive	0	0	0
Google Play Store	e10b96fe-d38b-4c1d-9265-fb88da69efc8	Awesome!	juvelyn alfonso	##########			0	en	us		5	en	awesome	Positive	0	0	0
Google Play Store	9fb9cfee-cf53-4d77-9804-a74c0d8e32e8	I tried to login as new user and gave my credentials to get in but this is showing something went wrong. At least a new user registration doesn't happen properly then how would be their service... It was horrible because I wasted my time at morning..	suhail ibrahim	##########			0	en	us		1	en	try login new user give credentials get show something go wrong least new user registration doesnt happen properly would service horrible waste time morning	Negative	1	1	0
Google Play Store	f0f11b4c-307b-48a5-a205-8b4b49b8c4d8	Good sistam	Toufiqul Islam	##########			0	en	us		5	hi	good sistam	Positive	0	0	0
Google Play Store	a9a08cce-89f9-4ee4-b803-d3dfa82ad87e	Excellent. Friendly user.	Leonell Tamayo	##########			0	en	us		5	en	excellent friendly user	Positive	0	0	0
Google Play Store	91bf73cd-e6fa-4e48-a360-0685a22e5e1f	good and excellent bank services	Alejandro P Alipoyo	##########			0	en	us		5	en	good excellent bank service	Positive	0	0	0
Google Play Store	2b333891-c307-46f0-931a-6af36dfa8cb4	This is app is very good and easy to used	Jonathan “Jhon” Bayan	##########			0	en	us		5	en	app good easy use	Positive	0	0	0
Google Play Store	4cc3afdf-1159-42ab-b4f7-7208f6c2e856	Nice	norman billones	##########			0	en	us		4	en	nice	Positive	0	0	0
Google Play Store	bb3e8abe-bd25-46af-ae77-71273b4f36d0	This good app for online banking	Ahsan Shakoor	##########			0	en	us		5	en	good app online bank	Positive	0	0	0
Google Play Store	a194e7a7-f74d-4b0e-9cd8-11e08980d227	Good	Abdul Jasim Gazi	##########			0	en	us		5	en	good	Positive	0	0	0
Google Play Store	89ba9b11-dada-432e-9515-d472460e612b	An excellent experience	Ibrahim Zaroug	##########			0	en	us		5	en	excellent experience	Positive	0	0	0
Google Play Store	454f6b56-21df-4f8f-9c1a-fa8007a1dd3c	thnx 4 everything	mm kk	##########			0	en	us		5	en	thnx everything	Positive	0	0	0
Google Play Store	cec85a26-5539-481e-9644-d19baf1b2fda	Good service	mansoor bhati	##########			0	en	us		5	en	good service	Positive	0	0	0
Google Play Store	a7160b99-b8ee-4e92-b36a-cb6d05878157	Very easy backing App 👍	Abdul Sattar	##########			0	en	us		5	en	easy back app	Positive	0	0	0
Google Play Store	279005a0-31ab-45b8-8e79-897a99a0b552	very poor app	Aisha Cohay	##########			0	en	us		1	en	poor app	Negative	1	0	0
Google Play Store	39eca2e8-55a4-4dc9-8459-25534756ab3c	Not good	mohammed niyaz	##########			0	en	us		1	en	good	Negative	0	0	0
Google Play Store	4e4b3072-0cf0-44d6-b757-0dea6a7d52e6	The new version is very bad and very ugly design	Nour Al-Rasheed	##########			0	en	us		1	en	new version bad ugly design	Negative	1	0	0
Google Play Store	3985838b-04f5-450f-a205-fdacc8fb750a	Gooood	Hussain Ajaj	##########			0	en	us		4	en	gooood	Positive	0	0	0
Google Play Store	a4542f83-0998-4590-8c86-138ba51e1940	Goood	Ahmad Magloga	##########			0	en	us		5	ms	goood	Positive	0	0	0
Google Play Store	49112121-f3f2-452a-b7d4-c1cd9f8e0f6b	Very excellent	Md Kafeel	##########			0	en	us		5	en	excellent	Positive	0	0	0
Google Play Store	7a745482-f914-4675-b3ce-ade210679854	Very poor performance, tired of adding beneficiary multiple times but it get hanged always even after got the OTP. When accessing other options some error messages popping up without any hope.	Lovely thoughts	##########			31	en	us		1	en	poor performance tire add beneficiary multiple time get hang always even get otp access options error message pop without hope	Negative	1	1	1
Google Play Store	4497104d-175f-44c9-8cd9-384d31fdbd05	Better service and quick response	Issrar Hussain chouhan	##########			0	en	us		5	en	good service quick response	Positive	0	0	0
Google Play Store	b0e92df2-4557-4fdd-bbc2-47682759f895	Very good	Big Khod	##########			0	en	us		5	en	good	Positive	0	0	0
Google Play Store	d6ecfe0a-3094-4a03-94b5-4577de927a53	Good app	Mohammad Shabuddin	##########			0	en	us		5	en	good app	Positive	0	0	0
Google Play Store	12397227-8116-43fd-94a8-3a9323e98b20	Good	Iqbalkhan Khattak	##########			0	en	us		5	en	good	Positive	0	0	0
Google Play Store	dd8396a5-322e-42fb-9261-ad1fe56fff78	Very baaaad.. all the time can't login, most of the time ask for update and the update doesn't complete the downloading even using other source of Internet..	Torki Jedani	##########			0	en	us		1	en	baaaad time cant login time ask update update doesnt complete download even use source internet	Negative	0	1	0
Google Play Store	300bc6d5-4c0d-40f6-84a6-ca93d82f8688	Excellent	basiru Dmm	##########			0	en	us		5	en	excellent	Positive	0	0	0
Google Play Store	0f5a5309-45c7-4b94-893e-f33a2f505b7d	Useless app fu ******	mohamed Rifky	##########			0	en	us		1	en	useless app fu	Negative	1	0	0
Google Play Store	0bbed441-0cd1-49c7-97df-c37c1226bf88	easy ang update	dariel salavaria	2022-03-08 02:02:00			0	en	us		4	fil	easy ang update	Positive	0	0	0
Google Play Store	0eec0a9c-e34a-42f0-935e-896eb4ee2aa4	Its to hard to log in...	Narissa Salafudin	##########			0	en	us		1	en	hard log	Negative	0	1	0
Google Play Store	be2a9386-038e-4016-982c-9561f5e94f20	Good	saleh musa	##########			0	en	us		5	en	good	Positive	0	0	0
Google Play Store	7a5c23cb-1e93-40c3-b631-86e11a729b60	Good	basmbasmbasm basm	##########			0	en	us		5	en	good	Positive	0	0	0
Google Play Store	7309288a-01a1-4b62-9eea-fcaa92ec6d5e	Cant updated	Suhayb H	##########			0	en	us		1	en	cant update	Neutral	0	1	0
Google Play Store	d9e02cc9-7817-4b3b-b53f-5de1228c6958	Updating very slow	Ashaf Yusef	##########			0	en	us		1	en	update slow	Negative	0	0	1
Google Play Store	62c30d46-e7d3-4340-8887-48aefee9a95e	Good service	Abu Salman	2022-03-03 06:49:00			0	en	us		5	en	good service	Positive	0	0	0
Google Play Store	d185d9ec-d5a2-41e4-84d6-1f86ec90e5cc	It's very good app ..	Khalid Mehmood Kamboh	2022-03-03 05:47:00			0	en	us		5	en	good app	Positive	0	0	0
Google Play Store	a2e37c9f-ed15-47de-b80d-8c02d7c2d10e	Good app	Shafee Shafeek	##########			0	en	us		5	en	good app	Positive	0	0	0
Google Play Store	cfc84413-62cc-4e4b-b3c0-4f96edaeb942	good	TEENPAIT2 TEENPAIT2	##########			0	en	us		5	en	good	Positive	0	0	0
Google Play Store	47cf2a9f-3000-421e-8daf-f0c3dd197e3f	Goooood	Noor Mohad khan	2022-03-02 07:41:00			0	en	us		5	hi	goooood	Positive	0	0	0
Google Play Store	ba864d73-ccb5-423c-ab14-c6836de58c7d	Very good	Syedifthekar Ahmed	2022-03-02 04:55:00			0	en	us		5	en	good	Positive	0	0	0
Google Play Store	8c0f3361-7580-40b3-a507-e697b748fe1c	The best bank in KSA	Ghassan Wizza	2022-03-02 00:37:00			0	en	us		5	en	best bank ksa	Positive	0	0	0
Google Play Store	c69a0c08-8282-4586-a5de-1fdc0ca94474	Good	Khalidfrh Rahman	##########			0	en	us		5	en	good	Positive	0	0	0
Google Play Store	030da1fc-0255-4eec-a271-9667f1a830dc	Very Nice	rajeeb mohammed	##########			0	en	us		5	en	nice	Positive	0	0	0
Google Play Store	2215a469-eda6-4ba9-98ae-9f3cbdc0043a	Its take very long time to do its update	sheree mae Edpan	2022-03-01 06:16:00			0	en	us		3	en	take long time update	Negative	0	0	1
Google Play Store	7323d409-6897-4f8e-8d70-b778d45182c9	Its good 👍	Fariyad Pathan	##########			0	en	us		5	en	good	Positive	0	0	0
Google Play Store	3afb4ce8-25b4-4a59-a163-fd382ec3b570	Very good application 👌 👌	S.Ansari status	##########			0	en	us		5	en	good application	Positive	0	0	0
Google Play Store	14d8c10f-7f06-492d-93ed-7d5f55d35d89	Axcilant	Rana Qasim ali	##########			0	en	us		5	en	axcilant	Neutral	1	0	0
Google Play Store	0e380beb-655f-400b-b82b-f093d670a06c	Excelent performance 👍	Zahid Iqbal	##########			0	en	us		5	ro	excelent performance	Positive	0	0	0
Google Play Store	fab5009d-529d-43f4-8e69-0e7568e4b1b7	The latest update is very bad during login, I tried many times, it took longer time, ended with error and return to login page.	Amir Kamil	##########			14	en	us		1	en	late update bad login try many time take long time end error return login page	Negative	1	1	0
Google Play Store	403060b4-bcd5-4b16-8001-49e78c389334	I like aljazera App .but when i visit bank 1st Time one employee told me open Account than i will give you credit card .now gona 3 years but he didn't give me card ..other wise bank ia very good and in future i use this bank account in sha ALLAH. Thanks	Islamic Media Channel	##########			5	en	us		5	en	like aljazera app visit bank st time one employee tell open account give credit card gona years didnt give card wise bank ia good future use bank account sha allah thank	Neutral	1	0	0
Google Play Store	a20eda70-1269-4079-acaa-7bf46439fa83	Whats happening this apps? Connectivity error how can i transact my accnt if emergency	Girly Garcia	##########			0	en	us		1	en	whats happen apps connectivity error transact accnt emergency	Negative	0	1	0
Google Play Store	88ebe922-9a11-4e49-a1de-7a6d223fa916	Verry nice i love it	aminullah khan	##########			0	en	us		5	en	verry nice love	Positive	0	0	0
Google Play Store	23ff9e49-da88-47ca-89f3-1f9808ceef1f	Good app..no hustle	BIENVENIDO canunayon	##########			0	en	us		5	en	good appno hustle	Positive	0	0	0
Google Play Store	9a652a0b-c955-4885-871f-b57ae6eaba9c	Very good	Mhmd Hassan	##########			0	en	us		5	en	good	Positive	0	0	0
Google Play Store	4b23fd5b-06fe-42ae-aae9-e6c4e8dda3f5	Very good experience with aljazira smart	mohammed ateeq	##########			0	en	us		5	en	good experience aljazira smart	Positive	0	0	0
Google Play Store	809b5405-23b2-4dab-b84a-234328bca7f9	Number 1	Saladin Daranda	##########			0	en	us		5	en	number	Neutral	0	1	0
Google Play Store	395e2914-e416-4737-81fa-3c3c123e0479	How to change username	Mohammad shagil	##########			0	en	us		5	en	change username	Neutral	1	0	0
Google Play Store	12ef6adf-05a6-4038-9078-64baffee84db	Good work	Juned Khan	##########			0	en	us		5	en	good work	Positive	0	0	0
Google Play Store	2a79b25c-8465-4710-b70c-f265246b50ef	The new loop is awesome and full of features.	Bahjat Fakieh	##########			2	en	us		5	en	new loop awesome full feature	Positive	0	0	0
Google Play Store	c03b97af-29ca-4322-b1d3-5587b64e8139	Very good	Ikram Shahid	##########			0	en	us		5	en	good	Positive	0	0	0
Google Play Store	f46f031c-0cb7-4cc9-b3e1-07a3ce8356ae	good	rashida shah	##########			0	en	us		5	en	good	Positive	0	0	0
Google Play Store	42c50d8b-07d3-4490-b036-28042fdab4e0	Excellent	Arman Pozon	##########			0	en	us		5	en	excellent	Positive	0	0	0
Google Play Store	afbbf0eb-39a3-4c80-a649-b8e3354950f0	Awesome	Khurram Shahzad	##########			0	en	us		5	en	awesome	Positive	0	0	0
Google Play Store	014aacd1-b2e6-40a9-ac7f-56e3d188db65	Always good experience 🥰	suneer Nazeer	##########			0	en	us		4	en	always good experience	Positive	0	0	0
Google Play Store	81811441-cadd-489d-8a39-0208e46435b5	☆☆☆E X C E L L E NT☆☆☆	Gio Zeta	##########			0	en	us		5	it	e x c e l l e nt	Neutral	0	0	0
Google Play Store	9980c270-36d3-42dd-967e-b2f28a629aec	Very good	tech Pk	##########			0	en	us		5	en	good	Positive	0	0	0
Google Play Store	d5a8eea7-506e-4e69-820e-ea4ed9b57c53	Good service	nisarahmad sami	##########			0	en	us		4	en	good service	Positive	0	0	0
Google Play Store	9c77ee55-0a0a-44cf-a0df-b900753ae352	best	Tusif Ali	##########			0	en	us		5	en	best	Positive	0	0	0
Google Play Store	956831c4-fc05-4efd-a856-50c6f000987f	Good	mohamed rafiq	##########			0	en	us		5	en	good	Positive	0	0	0
Google Play Store	3cd56aa9-7d9f-445f-8358-39419187f145	Need to quick response for sending otp	Abdul Khaliq Shah	##########			0	en	us		5	en	need quick response send otp	Neutral	0	0	0
Google Play Store	34fab289-40c1-44c8-89a6-1dce06e9d8d9	Always have problems in login	Rani Brashi	##########			0	en	us		2	en	always problems login	Negative	0	1	0
Google Play Store	bab29675-f8f9-4677-ac61-b13b8455f457	Good	Sarfuddin Shaikh	##########			0	en	us		5	en	good	Positive	0	0	0
Google Play Store	7dd28949-3662-446c-89f2-6533714ca8d1	Nice	MD RUBEL MIAH	##########			0	en	us		4	en	nice	Positive	0	0	0
Google Play Store	77a5e5b0-75ac-40d8-b569-0fff83c06dab	Very useful app.. don't know why so many negative experience 😕	Jonas Reyes	##########			0	en	us		5	en	useful app dont know many negative experience	Positive	1	0	0
Google Play Store	5f5ab39b-063d-429c-b676-869bbfede445	Good Applications	Masthan Masthan	##########			0	en	us		3	en	good applications	Positive	0	0	0
Google Play Store	1199392e-8821-4943-a683-bcca8172a3e2	It's nice to send	Glendo Tabucanon	##########			0	en	us		5	en	nice send	Positive	0	0	0
Google Play Store	9ce8135a-accc-44ea-82e0-68bb005a98b7	Excellent	Haider Ali	##########			0	en	us		5	en	excellent	Positive	0	0	0
Google Play Store	a2c458e4-c419-414a-a3b0-c7b8163ebefd	Amezing app very good experience	Noor Gold way	##########			0	en	us		5	en	amezing app good experience	Positive	0	0	0
Google Play Store	6feb2d53-8802-4cd1-95c1-7ce8e7767b55	Easy and reliable	Muhammad Arshad	##########			0	en	us		5	en	easy reliable	Positive	0	0	0
Google Play Store	d8f4d448-3a63-4aac-86e2-5e901a952868	Best app	Abbas Jutt	##########			0	en	us		5	en	best app	Positive	0	0	0
Google Play Store	1cc48a6e-5381-498c-a0d4-4e12e3c23c08	Veary nice aljazira internet banking veary fast good rates and easy to use	murtaza jamali	##########			0	en	us		5	en	veary nice aljazira internet bank veary fast good rat easy use	Positive	0	0	0
Google Play Store	08c31048-78bb-4078-8785-b05c1beb8b58	Nice app😍	Ahshan Islam	##########			0	en	us		5	en	nice app	Positive	0	0	0
Google Play Store	acef19ec-0597-4ac0-8207-bd720121f7bf	From worst to worst	As Re	##########			0	en	us		1	en	bad bad	Negative	1	0	0
Google Play Store	d3f06883-d4f5-402f-b563-9d2f6b696cfd	Exceptional service. Local sarie transfer is available now.	Pao Marzonia	##########			0	en	us		5	en	exceptional service local sarie transfer available	Positive	1	1	0
Google Play Store	0f632eb8-4fff-498a-92ae-573c6ef5d814	Very good	karri raghu	##########			0	en	us		5	en	good	Positive	0	0	0
Google Play Store	f1713e18-a154-407c-ad76-e06adef79cad	Good app	Muhammad Ikraam	##########			0	en	us		5	en	good app	Positive	0	0	0
Google Play Store	9538eb4a-330e-4838-8749-fe59536f9b37	I can't make local transfer to another bank	ashikh kallingal	##########			0	en	us		1	en	cant make local transfer another bank	Neutral	0	1	0
Google Play Store	68b3c466-0d0a-43b2-9bc6-be71095bdbe4	Great service	Syed Sadeq	##########			0	en	us		5	en	great service	Positive	0	0	0
Google Play Store	7b24545d-5009-4850-aca5-504200eaa030	very good app	joevil andaya	##########			0	en	us		5	en	good app	Positive	0	0	0
Google Play Store	138b2294-90e3-47ac-b0a7-04efe1784f82	Nice	FiBi G	##########			0	en	us		5	en	nice	Positive	0	0	0
Google Play Store	1b659302-1366-48be-b886-dec95d3cc6db	Cant even log in	Jeuminnesse Anne Camenia	##########			0	en	us		1	en	cant even log	Negative	0	1	0
Google Play Store	58d406c8-926c-4738-bf4c-33e765877347	Good work	Amanat Khan	##########			0	en	us		5	en	good work	Positive	0	0	0
Google Play Store	2605fca1-bc6b-460c-9b9d-ab159f97f4d5	Very very bad the app not installing and trouble improve the app	Khuddus Ahmed	##########			0	en	us		1	en	bad app instal trouble improve app	Negative	1	0	0
Google Play Store	c8f08d23-7888-4377-8c9f-c8f0330a5464	Stop working	ابو احمد القحطاني	##########			0	en	us		1	en	stop work	Neutral	0	1	0
Google Play Store	3ee7334a-810a-41f9-8994-6dc45ac5a400	Best	Ali Abbas	##########			0	en	us		4	en	best	Positive	0	0	0
Google Play Store	1388bf41-18f7-4b5e-b393-5866608b1b0d	good	Rishsn Riyaz	##########			0	en	us		5	en	good	Positive	0	0	0
Google Play Store	a9eed12a-a4a6-4c11-8c23-91179cc9a852	Awesome	Sahil Minhas	##########			0	en	us		5	en	awesome	Positive	0	0	0
Google Play Store	a4a61b33-e881-4acf-ba28-fcb4ada44915	Very satisfied with the Service	Aldrin Guangco	##########			0	en	us		5	en	satisfy service	Positive	1	0	0
Google Play Store	71a109f0-19fe-4ce7-858c-018ada2c721a	Very helpful apps	Andro Nico Lumbang	##########			1	en	us		5	en	helpful apps	Positive	1	0	0
Google Play Store	1af7a581-ccfc-4a1d-a318-3057126222f8	Nice	Afzal ali	##########			0	en	us		5	en	nice	Positive	0	0	0
Google Play Store	e192814a-8cc4-40e9-bf0e-68ed80b0f06f	Very worst app, I can't add any benificary. Really I'm tired 😴😴 How can I add beneficiary????	Ameen Ibrahim	##########			0	en	us		1	en	bad app cant add benificary really im tire add beneficiary	Negative	1	1	0
Google Play Store	5a8d6735-a64e-4bea-8b29-4d014237c568	Excellent one but Need to allow zooming Letters are small and difficult to read sometimes	Muaz Elatta	##########			4	en	us		4	en	excellent one need allow zoom letter small difficult read sometimes	Neutral	1	0	0
Google Play Store	87c79dc9-014f-4326-8bf3-e2fa48061476	Getting good	jim show	##########			0	en	us		5	en	get good	Positive	0	0	0
Google Play Store	66c02ba5-9be2-4e10-a547-cbaf7ece1480	Nice	Ali Hassan	2022-01-02 08:05:00			0	en	us		5	en	nice	Positive	0	0	0
Google Play Store	95acd977-b133-4c1f-af53-18e02f2476a7	Great app, intuitive and great performance	Jose Manuel Palomo Oviedo	##########			0	es	us		5	en	great app intuitive great performance	Positive	0	0	0
Google Play Store	686c9fef-d455-41d9-98c5-449fe56712fc	Good	Ma Mo	##########			0	ar	us		5	en	good	Positive	0	0	0
Google Play Store	449acce5-7b02-4cdf-bfde-25693966162e	968000000000	‪Sgf (‫آعمآل حرة٠٠٩٦٧٧٨٠٥٨١٩٨٢‬‎)‬‏	##########			0	ar	us		5	en		Neutral	0	0	0
Google Play Store	6b7b5799-f890-4686-92ac-b247f409500a	Waw	Mohammed Alrasheedi	##########			0	ar	us		5	en	waw	Neutral	0	0	0
Google Play Store	2666d8a0-83da-4fce-b64a-7c03f83cb3b3	v.good	abbas Kamal	##########			0	ar	us		4	en	vgood	Positive	0	0	0
Google Play Store	627bb611-c725-4dd2-bf04-e39313ee2591	Good	naaem mohamad	##########			0	ar	us		5	en	good	Positive	0	0	0
Google Play Store	7a8ea0b1-7fa4-42bd-bc11-06728a85635b	Ok	دكتور سليمان	##########			0	ar	us		5	en	ok	Positive	0	0	0
Google Play Store	a98b334d-59a7-445e-b67c-cc6c43928667	Exellent	هشام المتعشي	##########			0	ar	us		5	lb	exellent	Neutral	1	0	0
Google Play Store	9f3f1541-21b0-482b-bf5b-1093fa7186d1	10	هاني الشريف	2022-03-01 05:16:00			0	ar	us		5	und		Positive	0	0	0
Google Play Store	b2492c3b-cd14-4acb-8953-9d657c997ad6	Good 👍	Meshooo Meshooo	##########			0	ar	us		5	en	good	Positive	0	0	0
Google Play Store	9d9e07a1-1548-423e-a100-acb2d7cef35a	Ok	ݺ،عبدالرحمن ݺ،الشمري	2022-02-04 09:15:00			0	ar	us		5	en	ok	Positive	0	0	0
Google Play Store	950d39ff-cc19-4395-b4ff-de634c69eb53	دےتت3تتفدگ3گ545چ۔ ععع2ور	Imran Khan	##########			0	en	us		2	sd		Neutral	0	0	0
