# Supplementary material for: Retrieval-augmented generation analysis of user reviews in Saudi mobile banking apps: a comparative user experience study of iOS and Android
Source: PeerJ journal article supplement (doi:10.7717/peerj-cs.3565), 2026-02-06
Supplement: Android.zip [file anb_Mobile_sentiments.xlsx]

## Sheet: Sheet 1 - anb_Mobile_sentiments
anb_Mobile_sentiments
source	review_id	review_description	user_name	review_date	developer_response	developer_response_date	thumbs_up	language_code	country_code	app_version	rating	en	cleaned_reviews	Sentiment	Satisfaction	Effectiveness	Efficiency
Google Play Store	cfe90997-3898-4bb8-8eeb-548bd9ce6c7c	The best bank in terms of security.	Hassan Moafa	2023-09-28 21:28:11	نحن سعيدين بمشاركتنا رأيك وتجربتك معنا. شكرا لك	2023-10-01 06:32:15	0	en	us		5	ar	best bank term security	Positive	0	0	0
Google Play Store	8eee1b19-d665-4dd6-9113-dce59f4414c2	the worst application, the transfer is stuck.	Deem	2023-09-25 11:14:23	نعتذر للمشكلة التي واجهتك ونشكر لك ملاحظاتك لمساعدتك يرجى مشاركتنا تفاصيل المشكلة التي واجهتك عبر الرابط https://anb.tw/3Vpq1cv شكرا لزيارتك.	2023-10-01 06:29:40	0	en	us		1	ar	bad application transfer stick	Negative	1	0	1
Google Play Store	58f9a873-b9aa-46d7-b512-37e8ed3538ba	Bad and slow.	سليمان الحبيب	2023-09-07 21:41:27	نعتذر للمشكلة التي واجهتك ونشكر لك ملاحظاتك لمساعدتك يرجى مشاركتنا تفاصيل المشكلة التي واجهتك عبر الرابط https://anb.tw/3Vpq1cv شكرا لزيارتك.	2023-09-10 05:31:50	0	en	us		1	ar	bad slow	Negative	1	0	1
Google Play Store	6a84bc8e-b058-4047-ac03-714d28de4a3a	He always asked me about location determination, even though I have already specified it several times.	Melhem Malaeb	2023-09-03 05:59:20	نعتذر للمشكلة التي واجهتك ونشكر لك ملاحظاتك لمساعدتك يرجى مشاركتنا تفاصيل المشكلة التي واجهتك عبر الرابط https://anb.tw/3Vpq1cv شكرا لزيارتك.	2023-09-05 05:16:29	0	en	us		1	ar	always ask location determination even though already specify several time	Neutral	0	1	0
Google Play Store	1b598c55-81af-4088-bf9b-2212f244f943	Unfortunately, the GPS was connected but it is not working.	Kil X	2023-09-01 17:39:07	نعتذر للمشكلة التي واجهتك ونشكر لك ملاحظاتك لمساعدتك يرجى مشاركتنا تفاصيل المشكلة التي واجهتك عبر الرابط https://anb.tw/3Vpq1cv شكرا لزيارتك.	2023-09-03 05:58:32	1	en	us		1	ar	unfortunately gps connect work	Negative	0	1	0
Google Play Store	e5383d3c-9325-45ff-a57b-c040118af99b	Before activating the location service, the program was excellent. And currently, it continues to request the location to be determined despite being activated and the application being opened, which causes a backward step and changing the temporary code multiple times.	Al omari	2023-08-28 17:26:26	نعتذر للمشكلة التي واجهتك ونشكر لك ملاحظاتك لمساعدتك يرجى مشاركتنا تفاصيل المشكلة التي واجهتك عبر الرابط https://anb.tw/3Vpq1cv شكرا لزيارتك.	2023-08-30 05:05:47	1	en	us		1	ar	activate location service program excellent currently continue request location determine despite activate application open cause backward step change temporary code multiple time	Positive	0	1	0
Google Play Store	3b566f24-9eb6-4a74-952f-d146b9b0de3d	The latest update has a problem with location detection. The location is enabled, but with every movement, a message is issued stating that location detection is closed.	shady badr	2023-07-16 07:57:52	نعتذر للمشكلة التي واجهتك ونشكر لك ملاحظاتك لمساعدتك يرجى مشاركتنا تفاصيل المشكلة التي واجهتك عبر الرابط https://anb.tw/3Vpq1cv شكرا لزيارتك.	2023-07-18 04:25:14	0	en	us		1	ar	late update problem location detection location enable every movement message issue state location detection close	Negative	0	1	0
Google Play Store	1f58649c-7cb0-4f40-9e04-be61684f9d81	A very wonderful application.	Omar Hasan	2023-07-03 06:37:59	نحن سعيدين بمشاركتنا رأيك وتجربتك معنا. شكرا لك	2023-07-05 04:19:07	0	en	us		5	ar	wonderful application	Positive	0	0	0
Google Play Store	800522f4-f7a2-47ad-85d9-385330a6321f	After the latest update, the bill payment icon is not working.	Nour Al-Rasheed	2023-06-26 09:57:42	نعتذر للمشكلة التي واجهتك ونشكر لك ملاحظاتك لمساعدتك يرجى مشاركتنا تفاصيل المشكلة التي واجهتك عبر الرابط https://anb.tw/3Vpq1cv شكرا لزيارتك.	2023-07-04 11:52:07	14	en	us		1	ar	late update bill payment icon work	Negative	0	1	0
Google Play Store	6147a7bd-e196-4ecc-803a-8fffd783af67	The application is the worst, I swear to God. It is not worth it at all, neither as an application nor as a customer service.	fakhri mazen	2023-06-25 21:18:39	نعتذر للمشكلة التي واجهتك ونشكر لك ملاحظاتك لمساعدتك يرجى الاتصال بنا على 8001244040 او يمكنك مراسلتنا على حسابنا في تويتر @anb_care شكرا لك.	2023-07-02 10:25:09	0	en	us		1	ar	application bad swear god worth neither application customer service	Negative	1	0	0
Google Play Store	00f58188-e6a4-432e-957e-396cde70085c	An application full of problems.	jehad sima	2023-06-25 13:07:38	نعتذر للمشكلة التي واجهتك ونشكر لك ملاحظاتك لمساعدتك يرجى الاتصال بنا على 8001244040 او يمكنك مراسلتنا على حسابنا في تويتر @anb_care شكرا لك.	2023-07-02 10:59:13	0	en	us		1	ar	application full problems	Negative	1	0	0
Google Play Store	098aa05c-f91b-4fea-b2f5-b38040a63896	Every time I try to open the application, I get this message: "Oops, an unexpected error occurred!!"	A B	2023-06-25 11:17:26	نعتذر للمشكلة التي واجهتك ونشكر لك ملاحظاتك لمساعدتك يرجى الاتصال بنا على 8001244040 او يمكنك مراسلتنا على حسابنا في تويتر @anb_care شكرا لك.	2023-07-02 11:07:38	0	en	us		1	ar	every time try open application get message oops unexpected error occur	Negative	0	1	0
Google Play Store	57ec24f3-2d1e-42d8-b051-b5e7f5bc2186	The application is very smooth. 64049	Saud Alkadi	2023-06-22 10:50:14	نحن سعيدين بمشاركتنا رأيك وتجربتك معنا. شكرا لك	2023-07-02 11:16:21	0	en	us		5	ar	application smooth	Positive	0	0	0
Google Play Store	1bd415c6-32c8-4001-ba35-d6fe1ddb79b2	After the last very bad update, the website is always experiencing malfunctions. Why do I have to open the website to access the application? Mind your own business, it doesn't concern you. Hopefully, I will be able to open the application from anywhere. What's your problem?	M & Z Channel	2023-06-20 15:34:50	نعتذر للمشكلة التي واجهتك ونشكر لك ملاحظاتك لمساعدتك يرجى مشاركتنا تفاصيل المشكلة التي واجهتك عبر الرابط https://anb.tw/3Vpq1cv شكرا لزيارتك.	2023-06-22 05:21:05	0	en	us		1	ar	last bad update website always experience malfunction open website access application mind business doesnt concern hopefully able open application anywhere whats problem	Negative	1	1	0
Google Play Store	17a755de-9b89-496f-a076-be045baf7ffa	Transferring money to accounts outside Saudi Arabia in Saudi Riyal is not available and does not work properly like other banks in Saudi Arabia.	Fawaz Wriakat	2023-06-13 04:43:07	We apologize about your experience, Please contact us via https://anb.tw/3Vpq1cv for further assistance. Thank you for your feedback!	2023-06-15 09:59:42	0	en	us		2	ar	transfer money account outside saudi arabia saudi riyal available work properly like bank saudi arabia	Negative	0	1	0
Google Play Store	fa55e05e-1b99-4557-91f2-0107055dc7af	One of the best banks in the Kingdom, they are very cooperative, especially the Ras Tanura branch, the service there is excellent.	Ahmed Abueleneen	2023-06-10 15:45:33	نحن سعيدين بمشاركتنا رأيك وتجربتك معنا ونتطلع لرؤيتك مجددا. شكرا لزيارتك.	2023-06-12 06:20:34	0	en	us		5	ar	one best bank kingdom cooperative especially ras tanura branch service excellent	Positive	0	0	0
Google Play Store	f0f4166e-e560-4b63-8033-7533e3964dbb	The application serves you and saves you the trouble of going to the bank and reviewing it, and it is truly an excellent service. However, after the recent update, there appeared a problem of not being able to download PDF files from the messages menu. Please fix this issue. Otherwise, the rating remains one star.	copy boom	2023-06-06 12:23:31	نعتذر للمشكلة التي واجهتك ونشكر لك ملاحظاتك لمساعدتك يرجى مشاركتنا تفاصيل المشكلة التي واجهتك عبر الرابط https://anb.tw/3Vpq1cv شكرا لزيارتك.	2023-06-08 10:14:12	1	en	us		1	ar	application serve save trouble go bank review truly excellent service however recent update appear problem able download pdf file message menu please fix issue otherwise rat remain one star	Positive	1	1	0
Google Play Store	ade2a9e4-433d-4b43-9a9f-3949d5dc98c6	Incomplete. I face difficulty in paying bills and also in paying the old application card. It was better to update the application; it works efficiently. Thank you.	H Tiger	2023-06-03 20:26:44	نعتذر للمشكلة التي واجهتك ونشكر لك ملاحظاتك لمساعدتك يرجى مشاركتنا تفاصيل المشكلة التي واجهتك عبر الرابط https://anb.tw/3Vpq1cv شكرا لزيارتك.	2023-06-05 06:47:25	4	en	us		5	ar	incomplete face difficulty pay bill also pay old application card good update application work efficiently thank	Negative	1	1	0
Google Play Store	d42489eb-a50c-45eb-b94f-4986ff6adbb1	They have placed the "Agree to terms and conditions" button and the "Cancel" button on top of each other. Who designed the app for you, for God's sake?	نجم Najm	2023-05-18 09:48:10	نعتذر للمشكلة التي واجهتك ونشكر لك ملاحظاتك لمساعدتك يرجى مشاركتنا تفاصيل المشكلة التي واجهتك عبر الرابط https://anb.tw/3Vpq1cv شكرا لزيارتك.	2023-05-21 13:05:22	1	en	us		1	ar	place agree term condition button cancel button top design app gods sake	Negative	1	1	0
Google Play Store	1737fdc1-e472-4554-bb69-62a731932fc9	Always malfunctioning and terrible, work on it a bit, the competing banks are constantly evolving.	Mohamad A Hassan	2023-05-02 16:38:42	نعتذر للمشكلة التي واجهتك ونشكر لك ملاحظاتك لمساعدتك يرجى مشاركتنا تفاصيل المشكلة التي واجهتك عبر الرابط https://anb.tw/3Vpq1cv شكرا لزيارتك.	2023-05-11 04:09:28	1	en	us		1	ar	always malfunction terrible work bite compete bank constantly evolve	Negative	1	1	0
Google Play Store	17883069-551e-4359-9da0-5ffc8f6d0559	The banking application and website do not work outside the kingdom. Is the issue clear to you? Please review the recent comments and try to solve the problem instead of automated responses.	Drsas Galaxy	2023-04-27 10:47:25	نعتذر للمشكلة التي واجهتك ونشكر لك ملاحظاتك لمساعدتك يرجى مشاركتنا تفاصيل المشكلة التي واجهتك عبر الرابط https://anb.tw/3Vpq1cv شكرا لزيارتك.	2023-04-30 07:00:14	1	en	us		1	ar	bank application website work outside kingdom issue clear please review recent comment try solve problem instead automate responses	Negative	0	1	0
Google Play Store	3dd3e33c-6825-4ede-99a0-74de794dc738	An odd program that does not allow entering uppercase letters if there are uppercase letters in the password. It is a perfect example of bad software. Now I cannot access my account.	HUSSAIN GHAREEB	2023-04-16 10:13:04	نعتذر للمشكلة التي واجهتك ونشكر لك ملاحظاتك لمساعدتك يرجى الاتصال بنا على 8001244040 او يمكنك مراسلتنا على حسابنا في تويتر @anb_care	2023-04-26 07:17:40	2	en	us		1	ar	odd program allow enter uppercase letter uppercase letter password perfect example bad software access account	Negative	1	1	0
Google Play Store	c9c75c4d-e528-4d39-9099-f31a9b18f4ad	I've been trying to access my account for more than 10 days, but the application gives me an error message, and sometimes it says there is no internet connection. I have deleted and reinstalled it multiple times, but the same problem persists. Please resolve the issue.	A Hamed	2023-03-28 11:35:50	نعتذر للمشكلة التي واجهتك ونشكر لك ملاحظاتك لمساعدتك يرجى مشاركتنا تفاصيل المشكلة التي واجهتك عبر الرابط https://anb.tw/3Vpq1cv شكرا لزيارتك.	2023-03-30 08:38:05	2	en	us		1	ar	ive try access account days application give error message sometimes say internet connection delete reinstall multiple time problem persist please resolve issue	Negative	0	1	0
Google Play Store	62662ec0-d0db-4298-bec6-666e4467de71	Very good.	waleed Al Dossary	2023-03-02 18:09:36	نحن سعيدين بمشاركتنا رأيك وتجربتك معنا. شكرا لك	2023-03-09 07:45:58	0	en	us		5	ar	good	Positive	0	0	0
Google Play Store	9ba4dd09-1c0b-4109-9002-1f9c4874438c	The program is bad, it doesn't work well, and it's very slow. I hope it can be developed better. Currently, the program is not working for me. I have tried uninstalling and downloading it again, but with no avail.	saleem salameh	2023-02-12 19:22:17	نعتذر للمشكلة التي واجهتك ونشكر لك ملاحظاتك لمساعدتك يرجى الاتصال بنا على 8001244040 او يمكنك مراسلتنا على حسابنا في تويتر @anb_care شكرا لك.	2023-02-16 09:40:52	2	en	us		1	ar	program bad doesnt work well slow hope develop good currently program work try uninstalling download avail	Negative	1	1	1
Google Play Store	a0a22259-841a-45a1-bc1d-ddedf708db53	Recently, and after the last three updates, the problems became noticeably repetitive in it.	MOTAMYZ HM	2023-02-09 10:50:00	نعتذر للمشكلة التي واجهتك ونشكر لك ملاحظاتك لمساعدتك يرجى الاتصال بنا على 8001244040 او يمكنك مراسلتنا على حسابنا في تويتر @anb_care شكرا لك.	2023-02-13 08:38:33	1	en	us		2	ar	recently last three update problems become noticeably repetitive	Negative	1	0	1
Google Play Store	7d4a742d-0523-433d-a235-b74289f24878	Technically and service-wise, the bank is backward.	Bisoo and Faroo	2023-02-09 09:35:02	نعتذر للمشكلة التي واجهتك ونشكر لك ملاحظاتك لمساعدتك يرجى الاتصال بنا على 8001244040 او يمكنك مراسلتنا على حسابنا في تويتر @anb_care شكرا لك.	2023-02-13 08:37:50	2	en	us		1	ar	technically servicewise bank backward	Negative	1	0	0
Google Play Store	143011ea-03f6-44f4-ae83-4a8e669fecae	A strange application displays a digital card with missing numbers that you cannot reveal, even though you can display the back card number (CVV).	Bandar ALSaleem	2023-01-28 14:22:16	نعتذر للمشكلة التي واجهتك ونشكر لك ملاحظاتك لمساعدتك يرجى مشاركتنا تفاصيل المشكلة التي واجهتك عبر الرابط https://anb.tw/3Vpq1cv شكرا لزيارتك.	2023-08-13 05:37:52	1	en	us		1	ar	strange application display digital card miss number reveal even though display back card number cvv	Negative	1	1	0
Google Play Store	cb92521b-672c-4374-8c1e-7ab04a3d49e2	After the update, the world messed up.	Mohammed Al.Essa (MFE)	2022-11-24 09:07:09	نعتذر للمشكلة التي واجهتك ونشكر لك ملاحظاتك لمساعدتك يرجى مشاركتنا تفاصيل المشكلة التي واجهتك عبر الرابط https://anb.tw/3Vpq1cv شكرا لزيارتك.	2022-12-06 08:36:17	0	en	us		1	ar	update world mess	Negative	1	0	0
Google Play Store	ef6bb1e2-9393-49a1-bdb5-c28a8e7fda39	Masha Allah is an Arabic phrase that is often used to express amazement, admiration, or appreciation. It can be translated to English as "God has willed it" or "What God has willed."	PSMHaneefa	2022-11-20 11:32:32	We’re pleased to hear about your experience with anb and hope to see you again soon!	2022-12-06 08:41:12	0	en	us		5	ar	masha allah arabic phrase often use express amazement admiration appreciation translate english god will god will	Positive	1	0	0
Google Play Store	f1f48370-35a8-4311-9fcb-b340215a2ed5	The application has been updated and it tells me that I have to register the device through a phone call to you!! Is this authorized by the bank or is it fraud?	Moon almoh	2022-10-25 09:53:31			0	en	us		3	ar	application update tell register device phone call authorize bank fraud	Negative	0	1	0
Google Play Store	1dd9aa4c-25c0-42c0-a90d-bd93bf66e475	Bad application and bank	Anas Al Sulaim	2022-10-24 21:19:29			0	en	us		1	ar	bad application bank	Negative	1	0	0
Google Play Store	ca168959-f790-4a85-a45e-3c66e4bac0df	the worstand sterile program that always requires updates, but it's useless.	Majdi Qanadilo	2022-10-16 09:01:22			0	en	us		1	ar	worstand sterile program always require update useless	Negative	1	0	0
Google Play Store	2b7504f4-c86c-485d-893e-a27d2fa8cb7d	It is very complicated and requires you to change the password and very complex conditions, and it does not accept a password that has been used before, knowing that global programs like PayPal, which is used worldwide, do not require such measures. Therefore, the program was deleted, and if the complexity continues with Arab Bank, I will close all my accounts with this bank and transfer them to …	Reuke Lotus (Ruru)	2022-10-13 19:48:26			0	en	us		1	ar	complicate require change password complex condition accept password use know global program like paypal use worldwide require measure therefore program delete complexity continue arab bank close account bank transfer another bank less complicate smooth	Negative	1	1	0
Google Play Store	fac3d97e-bbb4-4c0a-8bf1-2d581be06f7b	the worst application, doesn't allow me to open an account after I fill in everything. It tells me to go back to the branch. I went to the Al-Suwaidi branch and waited for half an hour while the employees had their lunch in the meeting room. The problem is that the barrier is almost transparent, meaning they should have been a bit more considerate, but it doesn't bother them. When they finished, …	Mohammed	2022-08-19 08:08:24	عميلنا العزيز، شكواك محل اهتمامنا نرجو تزويدنا بتفاصيل أكثر عن المشكلة حتى يتم توجيهها الى الجهة المعنية من خلال التواصل معنا عبر البريد الالكتروني ebank@anb.com.sa مع تحيات فريق دعم العربي نت والعربي موبايل	2022-10-30 13:21:37	0	en	us		1	ar	bad application doesnt allow open account fill everything tell go back branch go alsuwaidi branch wait half hour employees lunch meet room problem barrier almost transparent mean bite considerate doesnt bother finish one come ask issue know expression wasnt go help indeed within minute computer say go another branch worstbank even bad branch	Negative	1	1	0
Google Play Store	3d0ad54d-a48d-4ec8-9a85-229534c4e965	"God help retirees, there are no job opportunities and no ATMs, all of which are useless."	Majed Alfaifi	2022-07-29 23:40:57			0	en	us		1	ar	god help retire job opportunities atms useless	Negative	1	0	0
Google Play Store	fc235652-c024-41a1-be10-afe704a2f5fa	The application is not working.	Aaast Tmm	2022-07-27 17:13:23	عميلنا العزيز شكرا لتعاملك مع anb، نتطلع دائماً الى تقديم الافضل لكم، الرجاء تزويدنا بملاحظاتك على التطبيق عبر البريد الالكتروني: ebank@anb.com.sa وللمساعدة ارجوا الاتصال على هاتف العربي، خدمات الحسابات ومن ثم الضغط على خيار رقم 5 خدمات العربي نت والعربي موبايل. من داخل المملكة / 8001244040 من خارج المملكة / +966 11 212 7555	2022-10-30 08:12:51	0	en	us		2	ar	application work	Negative	0	1	0
Google Play Store	a59687f6-7bb5-4b41-80a0-6a4662de6b4b	This is a bad application and it doesn't work most of the time.	Mustafa Rn	2022-07-27 11:52:37			0	en	us		1	ar	bad application doesnt work time	Negative	1	1	0
Google Play Store	fefff6ec-3af9-4fbc-9259-fa42736e0b09	There is nothing worse than your services, except for your applications. I am unable to access my account since this morning. Request failed with status 503?!	ياسر ضحوي Yasir Dhawi	2022-07-27 08:46:40			0	en	us		1	ar	nothing bad service except applications unable access account since morning request fail status	Negative	1	1	0
Google Play Store	18e96a3e-06df-4244-8e50-aa90ca7a2950	Very big problems with the application.	Mohammad Marouf	2022-07-27 08:04:00			0	en	us		1	ar	big problems application	Negative	0	1	0
Google Play Store	7cc15d34-6209-4c79-82a3-a4b8b0ab03dd	The application is nice and its services are easy and clear. It is very convenient, but recently it has been freezing a lot and taking a long time to open.	F Al-Buainain	2022-06-05 11:01:36			0	en	us		4	ar	application nice service easy clear convenient recently freeze lot take long time open	Positive	1	0	1
Google Play Store	9257147b-8f38-4363-aba4-584fbe78caf1	Awesome	SYED FAISAL SHAH	2022-06-04 05:42:32			0	en	us		5	ar	awesome	Positive	0	0	0
Google Play Store	a1950380-e3c8-4ef7-95e1-db7eeb733152	When updating, I have to uninstall the application and then reinstall it again, and this is one of its disadvantages. Other applications can be updated without uninstalling them!	Emad Abdullah	2022-05-23 18:05:13			0	en	us		2	ar	update uninstall application reinstall one disadvantage applications update without uninstalling	Negative	0	1	0
Google Play Store	434173e6-5876-4d9e-84c4-2c488203ef24	Easy and useful.	Khalid Mohanna	2022-04-19 12:10:26	عميلنا العزيز شكرا لثقتك وتعاملك مع البنك العربي الوطني، نتطلع دائماً الى تقديم الافضل لكم مع تحيات فريق دعم العربي نت والعربي موبايل	2022-05-12 10:44:06	0	en	us		5	ar	easy useful	Positive	0	0	0
Google Play Store	083dc76e-ea6b-476a-b816-3ec66b395973	Great	Sami Al-Mohiany	2022-04-15 10:52:25	عميلنا العزيز شكرا لثقتك وتعاملك مع البنك العربي الوطني، نتطلع دائماً الى تقديم الافضل لكم مع تحيات فريق دعم العربي نت والعربي موبايل	2022-05-12 10:45:26	0	en	us		5	ar	great	Positive	0	0	0
Google Play Store	b6f0b580-1664-4abd-ad7a-0947a06cb538	The service of adding dependents for subscription is not working.	Hussein Maghaslah	2022-03-30 16:25:07			0	en	us		3	ar	service add dependents subscription work	Negative	0	1	0
Google Play Store	9f05418b-5c52-49b0-b3f8-5f71ddbaa8d9	We can use it in Egypt.	Se3da سعده	2022-03-27 20:20:37			0	en	us		3	ar	use egypt	Neutral	0	1	0
Google Play Store	ad566ab4-c01a-4803-ae49-84a3a8a63822	Does he work in Iraq?	Gafar Haris.	2022-03-27 16:12:30			0	en	us		5	ar	work iraq	Neutral	0	1	0
Google Play Store	dfa23ceb-3f5c-44f2-86ec-abb6d9419a8f	The app is extremely bad in terms of programming and the services provided. Not only are the services limited, but they also don't work due to a programming issue. The option for transfers in the app is just for show, nothing more. I don't understand if it's because it's a rewards card or what.	ay x2	2022-02-26 21:07:12			0	en	us		1	ar	app extremely bad term program service provide service limit also dont work due program issue option transfer app show nothing dont understand reward card	Negative	1	1	0
Google Play Store	1a469d40-d5aa-4e1b-bde9-3e685463fb0c	Very bad, very bad... This application only increases my blood pressure. God is sufficient for me.	Hamamah Alzahrani	2022-02-13 00:27:11			0	en	us		1	ar	bad bad application increase blood pressure god sufficient	Negative	1	0	0
Google Play Store	72cb6722-a99d-4236-83d8-f9e8a66aa50d	If it's not the worst, it is the most unsuccessful bank with terrible services in everything. I don't know how my company deals with you.	عبدالعزيز محمد	2022-02-01 05:21:12	عميلنا العزيز شكرا لتعاملك مع البنك العربي الوطني، نتطلع دائماً الى تقديم الافضل لكم، الرجاء تزويدنا بملاحظات على التطبيق عبر البريد الالكتروني: ebank@anb.com.sa وللمساعدة ارجوا الاتصال على هاتف العربي، خدمات الحسابات ومن ثم الضغط على خيار رقم 5 خدمات العربي نت والعربي موبايل. من داخل المملكة / 8001244040 من خارج المملكة / +966 11 212 7555	2022-02-02 09:02:13	0	en	us		1	ar	bad unsuccessful bank terrible service everything dont know company deal	Negative	1	0	0
Google Play Store	34c0243e-b00c-4b7a-ab26-27a0400b0ec0	Press an element to paste it into the text field. This application is genetically modified and is not suitable.	aziznaturphoto	2022-03-26 11:07:50			1	fr	us		1	ar	press element paste text field application genetically modify suitable	Negative	1	1	0
Google Play Store	bae8d994-c81f-4b9a-aec5-d259d8d14448	Saleh Al-Qusayfi is my wife's brother, the muezzin, and the master of Al-Namran Mosque. He and his gang have gathered in front of Al-Namran Mosque to kill me with their evil eye. They have brought people from different backgrounds. Last night, he had dinner but did not invite his neighbor who is resentful towards me, Muhammad Saleh Al-Qusayfi. In Bisha, they are trafficking drugs and kidnapping w…	G Hh	2023-09-30 10:05:17			0	ar	us		5	ar	saleh alqusayfi wifes brother muezzin master alnamran mosque gang gather front alnamran mosque kill evil eye bring people different background last night dinner invite neighbor resentful towards muhammad saleh alqusayfi bisha traffic drug kidnap women ensure demise	Negative	1	0	0
Google Play Store	63c159b6-c979-4976-b7f3-39c790b6a42c	Masha Allah, the application is really convenient and easy to use.	عبدالعزيز الحربي	2023-09-29 10:34:08	نحن سعيدين بمشاركتنا رأيك وتجربتك معنا. شكرا لك	2023-10-02 05:47:54	0	ar	us		5	ar	masha allah application really convenient easy use	Positive	0	0	0
Google Play Store	61df191d-dae4-4f15-8df7-55c29c45b5fc	Very bad, every time I log in, the website asks for the site even though the website service is activated.	ابو يسن	2023-09-27 18:12:02	نعتذر للمشكلة التي واجهتك ونشكر لك ملاحظاتك لمساعدتك يرجى مشاركتنا تفاصيل المشكلة التي واجهتك عبر الرابط https://anb.tw/3Vpq1cv شكرا لزيارتك.	2023-10-01 06:32:38	1	ar	us		1	ar	bad every time log website ask site even though website service activate	Negative	1	0	0
Google Play Store	5756113e-87bd-44e1-970e-8b4975ab5e52	The least that can be said is that the application is bad and does not meet the standards of your organization.	احمد عساف	2023-09-26 11:11:24	نعتذر للمشكلة التي واجهتك ونشكر لك ملاحظاتك لمساعدتك يرجى مشاركتنا تفاصيل المشكلة التي واجهتك عبر الرابط https://anb.tw/3Vpq1cv شكرا لزيارتك.	2023-10-01 06:30:50	2	ar	us		1	ar	least say application bad meet standards organization	Negative	1	0	0
Google Play Store	fafcf7e4-ab1c-4f22-8a34-e68fa2810e9f	The application is killing us with frequent updates. Now I am unable to login due to a location request, although I have granted the application access to my location. You are driving us crazy with your terrible application.	76moni 76moni	2023-09-25 16:33:49	نعتذر للمشكلة التي واجهتك ونشكر لك ملاحظاتك لمساعدتك يرجى مشاركتنا تفاصيل المشكلة التي واجهتك عبر الرابط https://anb.tw/3Vpq1cv شكرا لزيارتك.	2023-10-01 06:30:32	2	ar	us		1	ar	application kill us frequent update unable login due location request although grant application access location drive us crazy terrible application	Negative	1	1	0
Google Play Store	871914b8-706d-4e49-9e37-68d7f0d75586	Thank you.	ربيع الدوسري	2023-09-25 13:50:28	نحن سعيدين بمشاركتنا رأيك وتجربتك معنا. شكرا لك	2023-10-01 06:30:14	0	ar	us		5	ar	thank	Positive	0	0	0
Google Play Store	f56411a9-8269-4475-88c4-9b91df85839a	The application used to be excellent, but now it keeps crashing multiple times before it works.	لافي اللقماني	2023-09-25 12:06:00	نعتذر للمشكلة التي واجهتك ونشكر لك ملاحظاتك لمساعدتك يرجى مشاركتنا تفاصيل المشكلة التي واجهتك عبر الرابط https://anb.tw/3Vpq1cv شكرا لزيارتك.	2023-10-01 06:29:55	1	ar	us		1	ar	application use excellent keep crash multiple time work	Negative	1	1	0
Google Play Store	5b1c22f1-2c42-4af4-9ed7-4aba4d359fc2	By Allah, we are exhausted from the application. There is no progress, no updates have been made. The problem is that the salary has been deposited in the message, but there is no balance for the salary. And the biggest problem is that I receive messages deducting financial commitments. Find a solution in the application.	مبارك الحمادي	2023-09-25 06:31:21	نعتذر للمشكلة التي واجهتك ونشكر لك ملاحظاتك لمساعدتك يرجى مشاركتنا تفاصيل المشكلة التي واجهتك عبر الرابط https://anb.tw/3Vpq1cv شكرا لزيارتك.	2023-10-01 06:29:24	0	ar	us		1	ar	allah exhaust application progress update make problem salary deposit message balance salary big problem receive message deduct financial commitments find solution application	Negative	0	1	0
Google Play Store	5d053598-2aba-4aab-a37c-e2d66792ff51	He is not willing to open.	mohm mad	2023-09-24 21:21:54	نعتذر للمشكلة التي واجهتك ونشكر لك ملاحظاتك لمساعدتك يرجى مشاركتنا تفاصيل المشكلة التي واجهتك عبر الرابط https://anb.tw/3Vpq1cv شكرا لزيارتك.	2023-10-01 06:29:18	0	ar	us		1	ar	will open	Negative	0	1	0
Google Play Store	b4fa18be-5ad2-4b8a-b743-02b998224790	Problem with the update	مريم علي	2023-09-24 21:10:16	نعتذر للمشكلة التي واجهتك ونشكر لك ملاحظاتك لمساعدتك يرجى مشاركتنا تفاصيل المشكلة التي واجهتك عبر الرابط https://anb.tw/3Vpq1cv شكرا لزيارتك.	2023-10-01 06:29:11	0	ar	us		2	ar	problem update	Negative	0	1	0
Google Play Store	82fdc8e7-e2ec-4baf-ad81-dc3b1b2dfa78	The application in all banks is complicated. It asks for website activation, and the website is activated, but there is no response from the bank. I advise against dealing with Arab Bank due to their lack of interest.	يحي صالح ال فرحان	2023-09-24 12:29:30	نعتذر للمشكلة التي واجهتك ونشكر لك ملاحظاتك لمساعدتك يرجى مشاركتنا تفاصيل المشكلة التي واجهتك عبر الرابط https://anb.tw/3Vpq1cv شكرا لزيارتك.	2023-10-01 06:29:01	0	ar	us		1	ar	application bank complicate ask website activation website activate response bank advise deal arab bank due lack interest	Negative	1	1	0
Google Play Store	92647f5c-cb3c-434e-9b11-5759289fc9ca	The worst application ever.	جابر الفيفي	2023-09-24 07:43:47	نعتذر للمشكلة التي واجهتك ونشكر لك ملاحظاتك لمساعدتك يرجى مشاركتنا تفاصيل المشكلة التي واجهتك عبر الرابط https://anb.tw/3Vpq1cv شكرا لزيارتك.	2023-10-01 06:28:51	0	ar	us		1	ar	bad application ever	Negative	1	0	0
Google Play Store	2458dce6-f943-4438-b3d5-d1cc1aa1ac68	Arab Bank is the best bank.	نورة الهذلي	2023-09-23 17:02:41	نحن سعيدين بمشاركتنا رأيك وتجربتك معنا. شكرا لك	2023-10-01 06:28:38	0	ar	us		5	ar	arab bank best bank	Positive	0	0	0
Google Play Store	e0923700-61fb-47c9-81c1-ce2feab77c03	5 stars, and if there were more, I would give it thanks.	Khaledym1 Yosef	2023-09-23 10:34:28	نحن سعيدين بمشاركتنا رأيك وتجربتك معنا. شكرا لك	2023-10-01 06:28:30	0	ar	us		5	ar	star would give thank	Positive	0	0	0
Google Play Store	ffa490e4-486d-4ece-9be7-3211181123f0	Very unfortunately, the world is constantly evolving while the Arab world is constantly regressing.	khalid Al-ahmed	2023-09-21 20:17:25	نعتذر للمشكلة التي واجهتك ونشكر لك ملاحظاتك لمساعدتك يرجى مشاركتنا تفاصيل المشكلة التي واجهتك عبر الرابط https://anb.tw/3Vpq1cv شكرا لزيارتك.	2023-09-25 06:49:03	0	ar	us		1	ar	unfortunately world constantly evolve arab world constantly regress	Negative	1	0	0
Google Play Store	c055b921-5924-45b8-aafd-b6f5f46617a4	The application is not working, the program interface did not appear, and the login process.	ابو فهد الحربي	2023-09-21 07:34:34	نعتذر للمشكلة التي واجهتك ونشكر لك ملاحظاتك لمساعدتك يرجى مشاركتنا تفاصيل المشكلة التي واجهتك عبر الرابط https://anb.tw/3Vpq1cv شكرا لزيارتك	2023-09-25 06:48:51	0	ar	us		1	ar	application work program interface appear login process	Negative	0	1	0
Google Play Store	2791c136-3c18-4f4e-9a91-276021c250cc	Please activate the location service. The service is activated, but it is not working.	محمد حسين	2023-09-20 22:39:18	نعتذر للمشكلة التي واجهتك ونشكر لك ملاحظاتك لمساعدتك يرجى مشاركتنا تفاصيل المشكلة التي واجهتك عبر الرابط https://anb.tw/3Vpq1cv شكرا لزيارتك.	2023-09-25 06:48:41	0	ar	us		1	ar	please activate location service service activate work	Negative	0	1	0
Google Play Store	0ed868cf-a6f3-4dff-8053-441e63ca86c4	I do not recommend it at all.	حمد الاحمد	2023-09-20 16:46:41	نعتذر للمشكلة التي واجهتك ونشكر لك ملاحظاتك لمساعدتك يرجى مشاركتنا تفاصيل المشكلة التي واجهتك عبر الرابط https://anb.tw/3Vpq1cv شكرا لزيارتك.	2023-09-25 06:48:33	0	ar	us		1	ar	recommend	Negative	1	0	0
Google Play Store	89a4ec1a-2a48-4d6e-84a6-e75cbac9096e	You are a star and I owe it to you, but this trashy application has been asking to enable locations and requesting updates for two months and still doesn't work properly. You are making our lives miserable.	أبو تمارآ الزهراني	2023-09-20 12:38:10	نعتذر للمشكلة التي واجهتك ونشكر لك ملاحظاتك لمساعدتك يرجى مشاركتنا تفاصيل المشكلة التي واجهتك عبر الرابط https://anb.tw/3Vpq1cv شكرا لزيارتك.	2023-09-25 06:48:24	0	ar	us		1	ar	star owe trashy application ask enable locations request update two months still doesnt work properly make live miserable	Negative	1	1	0
Google Play Store	30f0b8a2-4af3-4ed4-9767-6981e4d24e7b	The worst banking application in history, the Bank of Khartoum application is better than it.	Mohamed Nasraldin {Bazooka}	2023-09-19 21:08:37	نعتذر للمشكلة التي واجهتك ونشكر لك ملاحظاتك لمساعدتك يرجى مشاركتنا تفاصيل المشكلة التي واجهتك عبر الرابط https://anb.tw/3Vpq1cv شكرا لزيارتك.	2023-09-25 06:48:18	0	ar	us		1	ar	bad bank application history bank khartoum application good	Negative	1	0	0
Google Play Store	5b9570c9-aa95-49f2-a918-b6f0178a3a47	A very wonderful, easy, and flexible application.	Kald Gamdi	2023-09-18 21:24:27	نحن سعيدين بمشاركتنا رأيك وتجربتك معنا. شكرا لك	2023-09-21 07:09:29	0	ar	us		5	ar	wonderful easy flexible application	Positive	0	0	0
Google Play Store	b855bb71-2ee0-41c8-a1f6-22c4f2ff06ac	A star that truly deserves a bad and heavy application, much improved in previous versions. Be much more merciful.	mohammad aljohani	2023-09-17 19:11:02	نعتذر للمشكلة التي واجهتك ونشكر لك ملاحظاتك لمساعدتك يرجى مشاركتنا تفاصيل المشكلة التي واجهتك عبر الرابط https://anb.tw/3Vpq1cv شكرا لزيارتك.	2023-09-21 07:08:45	0	ar	us		1	ar	star truly deserve bad heavy application much improve previous versions much merciful	Negative	1	0	1
Google Play Store	99ab29bb-7449-4fd1-8e98-a51f537bea2e	Good	abdrhman البيشي	2023-09-16 14:56:27	نحن سعيدين بمشاركتنا رأيك وتجربتك معنا. شكرا لك	2023-09-18 05:29:00	0	ar	us		3	ar	good	Positive	0	0	0
Google Play Store	9ce31098-4910-461a-bc57-1375d433c9c5	The updates are good, but we find more obstacles in your application. While non-profit organizations, government agencies, and others are working to remove barriers to communicate with their clients, your application does the opposite. It asks for location tracking (where is the privacy?) Okay, we opened the location and it keeps bothering us and reminding us multiple times to open the location u…	isa had	2023-09-16 11:16:40	نعتذر للمشكلة التي واجهتك ونشكر لك ملاحظاتك لمساعدتك يرجى مشاركتنا تفاصيل المشكلة التي واجهتك عبر الرابط https://anb.tw/3Vpq1cv شكرا لزيارتك.	2023-09-18 05:28:35	1	ar	us		1	ar	update good find obstacles application nonprofit organizations government agencies others work remove barriers communicate clients application opposite ask location track privacy okay open location keep bother us remind us multiple time open location exit application without complete task get affairs order talk facilitation look bank accommodate difficulties thank	Negative	1	1	0
Google Play Store	11c9f178-655c-48a5-959b-a627ec2ff61c	The worst thing is when someone requests to activate a website and it's not functioning.	محمد عبد الله	2023-09-16 02:08:44	نعتذر للمشكلة التي واجهتك ونشكر لك ملاحظاتك لمساعدتك يرجى مشاركتنا تفاصيل المشكلة التي واجهتك عبر الرابط https://anb.tw/3Vpq1cv شكرا لزيارتك.	2023-09-18 05:28:26	0	ar	us		1	ar	bad thing someone request activate website function	Negative	1	1	0
Google Play Store	5b14ec4f-568a-478c-9036-dae29cc2c5b6	Very bad.. The site asks for location permission when opening, and when the site is launched, it takes a long time to recognize the location. In some places, the location signal is poor, so you cannot perform any operations. I am in the process of transferring my data to another bank due to the poor quality of the application. If it were possible, I would give it less than one star.	القيصرعبد الله علي	2023-09-15 17:04:28	نعتذر للمشكلة التي واجهتك ونشكر لك ملاحظاتك لمساعدتك يرجى مشاركتنا تفاصيل المشكلة التي واجهتك عبر الرابط https://anb.tw/3Vpq1cv شكرا لزيارتك.	2023-09-18 05:28:10	0	ar	us		1	ar	bad site ask location permission open site launch take long time recognize location place location signal poor perform operations process transfer data another bank due poor quality application possible would give less one star	Negative	1	0	1
Google Play Store	28cb16ab-c4f7-454a-95a5-980619c9b76b	The application is excellent and completely different from the Arabic mobile application. On September 14, 2023, the application asks for location activation, even though the location is already activated, and it exits you from the application. The service is bad.	Mohammed AlTamimi	2023-09-14 11:39:50	نعتذر للمشكلة التي واجهتك ونشكر لك ملاحظاتك لمساعدتك يرجى مشاركتنا تفاصيل المشكلة التي واجهتك عبر الرابط https://anb.tw/3Vpq1cv شكرا لزيارتك.	2023-09-17 07:25:16	4	ar	us		1	ar	application excellent completely different arabic mobile application september application ask location activation even though location already activate exit application service bad	Negative	1	0	0
Google Play Store	385e29c8-d304-4d91-a3c2-9b2686902cf1	He hangs out a lot. He asks for permission to track locations. He is allowed to do whatever he wants as long as he opens up. He annoys me at the bank all the time.	Abu Waleed	2023-09-14 08:37:15	نعتذر للمشكلة التي واجهتك ونشكر لك ملاحظاتك لمساعدتك يرجى مشاركتنا تفاصيل المشكلة التي واجهتك عبر الرابط https://anb.tw/3Vpq1cv شكرا لزيارتك.	2023-09-17 07:24:44	0	ar	us		1	ar	hang lot ask permission track locations allow whatever want long open annoy bank time	Negative	0	1	1
Google Play Store	df2ad142-32a0-4ecc-9a25-971a435bf6a4	The worst application you can encounter is the one used by all banks for mobile banking, which is fast for all languages except Arabic, as it is very slow.	muhammed hmood	2023-09-14 04:27:35	نعتذر للمشكلة التي واجهتك ونشكر لك ملاحظاتك لمساعدتك يرجى مشاركتنا تفاصيل المشكلة التي واجهتك عبر الرابط https://anb.tw/3Vpq1cv شكرا لزيارتك.	2023-09-17 07:24:35	0	ar	us		1	ar	bad application encounter one use bank mobile bank fast languages except arabic slow	Negative	1	0	1
Google Play Store	08793513-6cf9-49d1-9606-8d0df38b770a	The application has become very bad after it was linked to the location tracking feature. It keeps kicking me out of the app every now and then, and we really need the app. We hope the management can solve the issue, otherwise, we will have to switch to another bank.	Eti Ite	2023-09-13 19:25:27	نعتذر للمشكلة التي واجهتك ونشكر لك ملاحظاتك لمساعدتك يرجى مشاركتنا تفاصيل المشكلة التي واجهتك عبر الرابط https://anb.tw/3Vpq1cv شكرا لزيارتك.	2023-09-17 07:23:49	0	ar	us		1	ar	application become bad link location track feature keep kick app every really need app hope management solve issue otherwise switch another bank	Negative	1	1	0
Google Play Store	3dd3759f-c736-4178-8047-cb2e90656877	The application is very, very, very bad. It asks for the location and the location is enabled but it doesn't even show the home page.	A_S ADLi	2023-09-13 03:04:12	نعتذر للمشكلة التي واجهتك ونشكر لك ملاحظاتك لمساعدتك يرجى مشاركتنا تفاصيل المشكلة التي واجهتك عبر الرابط https://anb.tw/3Vpq1cv شكرا لزيارتك.	2023-09-17 07:23:23	1	ar	us		1	ar	application bad ask location location enable doesnt even show home page	Negative	1	1	0
Google Play Store	72ce4fc8-88e9-4fb3-9cd5-ccb3792c4452	The application has been stuck/hanging for 5 days.	soliman awed	2023-09-12 15:55:08	نعتذر للمشكلة التي واجهتك ونشكر لك ملاحظاتك لمساعدتك يرجى مشاركتنا تفاصيل المشكلة التي واجهتك عبر الرابط https://anb.tw/3Vpq1cv شكرا لزيارتك.	2023-09-17 07:23:13	0	ar	us		1	ar	application stuckhanging days	Negative	1	0	1
Google Play Store	fcac6ef4-cea8-4452-b0d0-8ee632e142b6	The problem has been resolved.	Mojtaba Hassan	2023-09-12 14:08:47	نحن سعيدين بمشاركتنا رأيك وتجربتك معنا. شكرا لك	2023-09-17 07:23:00	0	ar	us		4	ar	problem resolve	Neutral	0	1	0
Google Play Store	21893477-dc26-4e4d-bf57-36ad668854f1	Very very annoying when you enter the application, it kicks you out immediately without any reason, and sometimes it asks for location activation even though the location service is already running, but the malfunction is dominating the system.	ابو مراد الزهراني	2023-09-12 08:35:22	نعتذر للمشكلة التي واجهتك ونشكر لك ملاحظاتك لمساعدتك يرجى مشاركتنا تفاصيل المشكلة التي واجهتك عبر الرابط https://anb.tw/3Vpq1cv شكرا لزيارتك.	2023-09-17 07:22:40	4	ar	us		1	ar	annoy enter application kick immediately without reason sometimes ask location activation even though location service already run malfunction dominate system	Negative	1	1	0
Google Play Store	8f4ca49e-38f5-4a87-96ae-a43ff9d2684b	The app does not work for me.	nawaf 1122	2023-09-11 19:39:21	نعتذر للمشكلة التي واجهتك ونشكر لك ملاحظاتك لمساعدتك يرجى مشاركتنا تفاصيل المشكلة التي واجهتك عبر الرابط https://anb.tw/3Vpq1cv شكرا لزيارتك.	2023-09-17 07:22:28	0	ar	us		1	ar	app work	Negative	0	1	0
Google Play Store	5ef2ccad-356c-4857-8318-0833547040aa	Excellent	وحيدعاشقAlREEM Rموت أحبكw	2023-09-11 19:00:21	شكرا لك سوف يتم اخذ ملاحظتك بعين الاعتبار ، نتطلع لرؤيتك مجددا. شكرا لزيارتك.	2023-09-17 07:22:09	0	ar	us		5	ar	excellent	Positive	0	0	0
Google Play Store	510de7c8-7013-4999-b9cd-1a0eee4c1222	The application used to open for me, but now it refuses to open. I have deleted it and reinstalled it several times, but it still refuses to open.	Hh Uui	2023-09-11 11:51:59	نعتذر للمشكلة التي واجهتك ونشكر لك ملاحظاتك لمساعدتك يرجى مشاركتنا تفاصيل المشكلة التي واجهتك عبر الرابط https://anb.tw/3Vpq1cv شكرا لزيارتك.	2023-09-17 07:21:47	0	ar	us		1	ar	application use open refuse open delete reinstall several time still refuse open	Negative	0	1	0
Google Play Store	038e3c12-81b8-4b77-a367-42de46437f07	the worst, so much that even his fame deceives him.	خالد العبدالعزيز	2023-09-11 07:24:34	نعتذر للمشكلة التي واجهتك ونشكر لك ملاحظاتك لمساعدتك يرجى مشاركتنا تفاصيل المشكلة التي واجهتك عبر الرابط https://anb.tw/3Vpq1cv شكرا لزيارتك.	2023-09-17 07:21:38	0	ar	us		1	ar	bad much even fame deceive	Negative	1	0	0
Google Play Store	8878cc7e-f25b-4b35-8ebc-a1eb2c353261	the worstprogram that doesn't open, it keeps asking for the website service, and the problem is that I activated it more than two weeks ago and I haven't been able to access it. It prevented me from benefiting from the services.	A7mad .S.A.T	2023-09-10 17:00:25	نعتذر للمشكلة التي واجهتك ونشكر لك ملاحظاتك لمساعدتك يرجى مشاركتنا تفاصيل المشكلة التي واجهتك عبر الرابط https://anb.tw/3Vpq1cv شكرا لزيارتك.	2023-09-12 05:31:49	0	ar	us		1	ar	worstprogram doesnt open keep ask website service problem activate two weeks ago havent able access prevent benefit service	Negative	1	1	0
Google Play Store	04a274c5-0882-4bd1-bf29-28a6f1fd4bcc	I apologize for the previous response. The issue I had was resolved. Thank you for your prompt response. 🌹	Dloo 12	2023-09-10 07:47:25	نحن سعيدين بمشاركتنا رأيك وتجربتك معنا. شكرا لك	2023-09-12 05:30:41	0	ar	us		1	ar	apologize previous response issue resolve thank prompt response	Positive	0	1	0
Google Play Store	60fd97e2-7a8c-4d72-a642-ffa67cc06d6c	The bank, after the last update of the website, is not working for me unfortunately. The update was supposed to make it better but it turned out worse.	غ. حكمي	2023-09-09 23:02:10	نعتذر للمشكلة التي واجهتك ونشكر لك ملاحظاتك لمساعدتك يرجى مشاركتنا تفاصيل المشكلة التي واجهتك عبر الرابط https://anb.tw/3Vpq1cv شكرا لزيارتك.	2023-09-12 05:30:08	0	ar	us		1	ar	bank last update website work unfortunately update suppose make good turn bad	Negative	1	1	0
Google Play Store	c958704f-4ba0-4f5f-8026-857a756aeb88	Location services have been enabled, and when opening the application, the pages close multiple times in order to open location services, which are already initially open.	hussain alsaeed	2023-09-09 20:37:33	نعتذر للمشكلة التي واجهتك ونشكر لك ملاحظاتك لمساعدتك يرجى مشاركتنا تفاصيل المشكلة التي واجهتك عبر الرابط https://anb.tw/3Vpq1cv شكرا لزيارتك.	2023-09-12 05:30:00	1	ar	us		1	ar	location service enable open application page close multiple time order open location service already initially open	Neutral	0	1	0
Google Play Store	89e4b15f-55a3-48dd-bd7c-8a3054d6e0ba	The application is not working... I deleted the application and reinstalled it, and it still doesn't work. Before that, a message about the site's operation used to appear repeatedly and it was annoying.	mohd harthi	2023-09-08 23:13:19	نعتذر للمشكلة التي واجهتك ونشكر لك ملاحظاتك لمساعدتك يرجى مشاركتنا تفاصيل المشكلة التي واجهتك عبر الرابط https://anb.tw/3Vpq1cv شكرا لزيارتك.	2023-09-12 05:29:26	1	ar	us		1	ar	application work delete application reinstall still doesnt work message sit operation use appear repeatedly annoy	Negative	0	1	1
Google Play Store	cbcb9193-3da1-411a-9b21-1f90e75aece2	It's self-explanatory.	علي العسيري	2023-09-08 22:38:22	نحن سعيدين بمشاركتنا رأيك وتجربتك معنا. شكرا لك	2023-09-12 05:29:14	0	ar	us		5	ar	selfexplanatory	Neutral	1	0	0
Google Play Store	930b7e89-ac2d-4fa5-9093-1df5c604e023	saf	مرضي	2023-09-08 05:11:01	نعتذر للمشكلة التي واجهتك ونشكر لك ملاحظاتك لمساعدتك يرجى مشاركتنا تفاصيل المشكلة التي واجهتك عبر الرابط https://anb.tw/3Vpq1cv شكرا لزيارتك.	2023-09-12 05:28:57	1	ar	us		2	ar	saf	Neutral	0	0	0
Google Play Store	9e12d729-40ea-47e5-b635-cd7f34dabe0f	Very bad. It is not possible to add a beneficiary for the transfer. It says I have exceeded the allowed limit, but I haven't added anyone. What if I add someone on another application? Shouldn't we cancel the whole bank?	مساعد عبدالله	2023-09-08 03:26:26	نعتذر للمشكلة التي واجهتك ونشكر لك ملاحظاتك لمساعدتك يرجى مشاركتنا تفاصيل المشكلة التي واجهتك عبر الرابط https://anb.tw/3Vpq1cv شكرا لزيارتك.	2023-09-12 05:28:48	0	ar	us		1	ar	bad possible add beneficiary transfer say exceed allow limit havent add anyone add someone another application shouldnt cancel whole bank	Negative	1	1	0
Google Play Store	e560ad4c-c203-4489-beae-10b7a2b95795	Fail. I entered the username from the same ATM card and it keeps saying error. Enter the correct username. There are many problems with it, it's not worth all the banks. They are all excellent except for Arab National Bank. Why do you think customers are valued?	krm al estar	2023-09-07 16:40:39	نعتذر للمشكلة التي واجهتك ونشكر لك ملاحظاتك لمساعدتك يرجى مشاركتنا تفاصيل المشكلة التي واجهتك عبر الرابط https://anb.tw/3Vpq1cv شكرا لزيارتك.	2023-09-10 05:31:41	0	ar	us		1	ar	fail enter username atm card keep say error enter correct username many problems worth bank excellent except arab national bank think customers value	Negative	0	1	0
Google Play Store	30f455fc-c1e6-4293-a874-2db9f161750b	"The worst bank in Saudi Arabia is yours. The service is extremely poor. The reason is that the application itself is not functioning properly. The transfer icon, for example, is not working, and nothing else is functioning either. The only good thing is that the application opens, but that's all."	Hashim Eshd	2023-09-07 11:44:03	نعتذر للمشكلة التي واجهتك ونشكر لك ملاحظاتك لمساعدتك يرجى مشاركتنا تفاصيل المشكلة التي واجهتك عبر الرابط https://anb.tw/3Vpq1cv شكرا لزيارتك.	2023-09-10 05:30:52	0	ar	us		1	ar	bad bank saudi arabia service extremely poor reason application function properly transfer icon example work nothing else function either good thing application open thats	Negative	1	1	0
Google Play Store	10511959-7b3c-4dce-9f54-aa85168b83a8	The problem still exists, I added the device and it is the only one. I seek the forgiveness of Allah for the trusted list. Moreover, it does not open or pay bills, and we cannot transfer to another bank to solve our problem. What's wrong with your application? The application does not pay the bills or transfer anything. What is your problem?	اطياف الراحلين	2023-09-06 01:26:01	نعتذر للمشكلة التي واجهتك ونشكر لك ملاحظاتك لمساعدتك يرجى مشاركتنا تفاصيل المشكلة التي واجهتك عبر الرابط https://anb.tw/3Vpq1cv شكرا لزيارتك.	2023-09-10 05:27:08	0	ar	us		1	ar	problem still exist add device one seek forgiveness allah trust list moreover open pay bill transfer another bank solve problem whats wrong application application pay bill transfer anything problem	Negative	0	1	0
Google Play Store	b5c06d10-3fe7-455a-9045-b0ffa0e40761	Something strange, suddenly the application is frozen, it doesn't open for me for more than an hour, I've been trying with it. It's increasing my stress.	South Falcon	2023-09-04 10:15:50	نعتذر للمشكلة التي واجهتك ونشكر لك ملاحظاتك لمساعدتك يرجى مشاركتنا تفاصيل المشكلة التي واجهتك عبر الرابط https://anb.tw/3Vpq1cv شكرا لزيارتك.	2023-09-07 11:40:40	0	ar	us		1	ar	something strange suddenly application freeze doesnt open hour ive try increase stress	Negative	1	1	1
Google Play Store	d602aaf7-66a1-4aa5-84bb-8fe8e5b333dc	He is constantly bored.	هايل الشراري	2023-09-04 09:14:58	نعتذر للمشكلة التي واجهتك ونشكر لك ملاحظاتك لمساعدتك يرجى مشاركتنا تفاصيل المشكلة التي واجهتك عبر الرابط https://anb.tw/3Vpq1cv شكرا لزيارتك.	2023-09-07 12:03:07	0	ar	us		1	ar	constantly bore	Negative	0	0	1
Google Play Store	d2f8252c-cbea-49f6-862d-f2c9e4485456	The new update is very bad. Sometimes it doesn't open and asks for site activation, forcing you out of operations. It asks to activate the site even though it's already activated. Unfortunately, I read the reviews about the application and found complaints in general!	ais ais	2023-09-03 04:04:36	نعتذر للمشكلة التي واجهتك ونشكر لك ملاحظاتك لمساعدتك يرجى مشاركتنا تفاصيل المشكلة التي واجهتك عبر الرابط https://anb.tw/3Vpq1cv شكرا لزيارتك.	2023-09-07 11:36:11	0	ar	us		1	ar	new update bad sometimes doesnt open ask site activation force operations ask activate site even though already activate unfortunately read review application find complaints general	Negative	1	1	0
Google Play Store	6900e364-f4ac-4942-a265-44d21342359b	Unfortunately, the application is very, very bad.	84 84	2023-09-02 14:31:44	نعتذر للمشكلة التي واجهتك ونشكر لك ملاحظاتك لمساعدتك يرجى مشاركتنا تفاصيل المشكلة التي واجهتك عبر الرابط https://anb.tw/3Vpq1cv شكرا لزيارتك.	2023-09-07 11:35:40	0	ar	us		1	ar	unfortunately application bad	Negative	1	0	0
Google Play Store	63826d14-597e-40b6-8874-b137a844bca7	The new update is extremely bad, it requests to activate the website but even when activating the website, it doesn't work and the application doesn't open either.	محمود الشرقاوي	2023-09-02 10:49:24	نعتذر للمشكلة التي واجهتك ونشكر لك ملاحظاتك لمساعدتك يرجى مشاركتنا تفاصيل المشكلة التي واجهتك عبر الرابط https://anb.tw/3Vpq1cv شكرا لزيارتك.	2023-09-07 11:34:37	3	ar	us		1	ar	new update extremely bad request activate website even activate website doesnt work application doesnt open either	Negative	1	1	0
Google Play Store	a05d7e1c-160a-45ce-b82c-2e291eea7deb	I swear to God, the Arab Bank Mobile applications are the worst and most frustrating. They cause me mental torment. Fix your application.	ABU RWAD	2023-09-02 05:16:23	نعتذر للمشكلة التي واجهتك ونشكر لك ملاحظاتك لمساعدتك يرجى مشاركتنا تفاصيل المشكلة التي واجهتك عبر الرابط https://anb.tw/3Vpq1cv شكرا لزيارتك.	2023-09-07 11:34:13	0	ar	us		1	ar	swear god arab bank mobile applications bad frustrate cause mental torment fix application	Negative	1	0	1
Google Play Store	5e077748-2de1-45b6-8bab-72aa22cdc5d4	The application is very bad, if you try to run it, it doesn't work within the application. This problem has been there for a week and it hasn't been fixed.	fw-zq A	2023-09-01 18:27:32	نعتذر للمشكلة التي واجهتك ونشكر لك ملاحظاتك لمساعدتك يرجى مشاركتنا تفاصيل المشكلة التي واجهتك عبر الرابط https://anb.tw/3Vpq1cv شكرا لزيارتك.	2023-09-03 05:58:25	1	ar	us		1	ar	application bad try run doesnt work within application problem week hasnt fix	Negative	1	1	0
Google Play Store	58739cea-e396-4f7b-bd64-3febfaa66f4a	Why can't a beneficiary be added at all? It's really affecting my situation negatively.	sa ne	2023-09-01 15:44:29	نعتذر للمشكلة التي واجهتك ونشكر لك ملاحظاتك لمساعدتك يرجى مشاركتنا تفاصيل المشكلة التي واجهتك عبر الرابط https://anb.tw/3Vpq1cv شكرا لزيارتك.	2023-09-03 05:58:39	1	ar	us		1	ar	cant beneficiary add really affect situation negatively	Negative	0	1	0
Google Play Store	2f5255b6-c95d-4806-b323-75082f474662	Worst experience, banks are supposed to improve, but this bank brings problems and the app doesn't open.	khaledh2	2023-09-01 10:44:40	نعتذر للمشكلة التي واجهتك ونشكر لك ملاحظاتك لمساعدتك يرجى مشاركتنا تفاصيل المشكلة التي واجهتك عبر الرابط https://anb.tw/3Vpq1cv شكرا لزيارتك.	2023-09-03 05:59:45	0	ar	us		5	ar	bad experience bank suppose improve bank bring problems app doesnt open	Negative	1	1	0
Google Play Store	c18b83bf-d644-4f93-a775-0ef444a80c4a	Among the distinctive and excellent banking applications is the one that is distinguished in handling deposits, transfers, paying for services and bills, and adding beneficiaries.	gaga5322 mut	2023-08-31 15:05:26	نحن سعيدين بمشاركتنا رأيك وتجربتك معنا. شكرا لك	2023-09-03 06:01:02	0	ar	us		5	ar	among distinctive excellent bank applications one distinguish handle deposit transfer pay service bill add beneficiaries	Positive	0	1	0
Google Play Store	1373a9a0-7fbf-42d4-92db-7ee5d9e162d2	Bad bank, most of its customers are retired. They should have a simpler and safer system.	صالح الحارثي	2023-08-31 06:14:36	نعتذر للمشكلة التي واجهتك ونشكر لك ملاحظاتك لمساعدتك يرجى مشاركتنا تفاصيل المشكلة التي واجهتك عبر الرابط https://anb.tw/3Vpq1cv شكرا لزيارتك.	2023-09-03 05:54:40	0	ar	us		1	ar	bad bank customers retire simple safe system	Negative	1	0	0
Google Play Store	2f70e276-bce6-4cbd-bcbd-762fd1158926	Excellent service	الذيب ذياب دبش	2023-08-30 20:09:57	نحن سعيدين بمشاركتنا رأيك وتجربتك معنا. شكرا لك	2023-09-03 05:54:13	0	ar	us		4	ar	excellent service	Positive	0	0	0
Google Play Store	d0cdd996-1307-4763-aaeb-705805bb552b	The garbage application freezes and every two days it asks for a new username, then it suspends the account. You want me to correct the comments I mentioned, but nothing is being fixed in the application, so my rating remains the same 👎👎. If you make any changes, let me know so I can update my rating.	assa 535	2023-08-30 19:17:33	نعتذر للمشكلة التي واجهتك ونشكر لك ملاحظاتك لمساعدتك يرجى مشاركتنا تفاصيل المشكلة التي واجهتك عبر الرابط https://anb.tw/3Vpq1cv شكرا لزيارتك.	2023-09-03 05:46:53	0	ar	us		1	ar	garbage application freeze every two days ask new username suspend account want correct comment mention nothing fix application rat remain make change let know update rat	Negative	1	1	1
Google Play Store	ce099a93-3440-4d43-9b42-d4008710975d	Bad location service provider and every time I try to activate it, the application doesn't work.	faisal alahmed	2023-08-30 08:14:06	نعتذر للمشكلة التي واجهتك ونشكر لك ملاحظاتك لمساعدتك يرجى مشاركتنا تفاصيل المشكلة التي واجهتك عبر الرابط https://anb.tw/3Vpq1cv شكرا لزيارتك.	2023-09-03 05:49:50	0	ar	us		1	ar	bad location service provider every time try activate application doesnt work	Negative	1	1	0
Google Play Store	982e42d1-8652-4c3d-a882-287f727f8648	I seek refuge in Allah. The worst application I have ever seen in my life. It made me mentally and nervously ill. Every time I try to open it, it just closes in my face, telling me to open the website when I have already opened it and everything is set correctly. It keeps shutting down, shutting down, and shutting down. May Allah take care of you for creating such an application. It has frustrate…	Leelo 20	2023-08-30 05:20:31	نعتذر للمشكلة التي واجهتك ونشكر لك ملاحظاتك لمساعدتك يرجى مشاركتنا تفاصيل المشكلة التي واجهتك عبر الرابط https://anb.tw/3Vpq1cv شكرا لزيارتك.	2023-09-03 05:44:07	0	ar	us		1	ar	seek refuge allah bad application ever see life make mentally nervously ill every time try open close face tell open website already open everything set correctly keep shut shut shut may allah take care create application frustrate us	Negative	1	0	0
Google Play Store	049fe78e-5904-4f48-9b84-cd93a0f8e26e	Please resolve the problem of the disabled online purchase activation button so that it can be restored. Now, every time I try to open the application, I receive a notification to activate the website, even though it is already activated, and I cannot access my account because of this constant notification.	qatrat nada	2023-08-29 22:16:24	نعتذر للمشكلة التي واجهتك ونشكر لك ملاحظاتك لمساعدتك يرجى مشاركتنا تفاصيل المشكلة التي واجهتك عبر الرابط https://anb.tw/3Vpq1cv شكرا لزيارتك.	2023-09-03 05:44:40	5	ar	us		3	ar	please resolve problem disable online purchase activation button restore every time try open application receive notification activate website even though already activate access account constant notification	Negative	0	1	0
Google Play Store	2f20ae5e-1c9e-48e8-a1b5-3e78c2b0a8c4	He asks for the location even though I gave him permission, but he insists on throwing a thousand balls before he opens.	Rank Kean	2023-08-29 12:45:12	نعتذر للمشكلة التي واجهتك ونشكر لك ملاحظاتك لمساعدتك يرجى الاتصال بنا على 8001244040 او يمكنك مراسلتنا على حسابنا في تويتر @anb_care شكرا لك.	2023-08-30 20:11:38	0	ar	us		1	ar	ask location even though give permission insist throw thousand ball open	Neutral	0	1	0
Google Play Store	5f65c6bb-b672-4ce5-a8f5-9793aef185f4	The workers on the application say that the development does not keep up with the backward.	Salman Gasas	2023-08-29 08:19:54	نعتذر للمشكلة التي واجهتك ونشكر لك ملاحظاتك لمساعدتك يرجى الاتصال بنا على 8001244040 او يمكنك مراسلتنا على حسابنا في تويتر @anb_care شكرا لك.	2023-08-30 20:11:48	0	ar	us		1	ar	workers application say development keep backward	Negative	1	0	0
Google Play Store	bd1b76b3-46b0-4808-9122-0c8a87a6c675	The program is not opening, it is frozen. I need help in issuing the invoices.	Rana alanzi	2023-08-29 05:24:17	نعتذر للمشكلة التي واجهتك ونشكر لك ملاحظاتك لمساعدتك يرجى الاتصال بنا على 8001244040 او يمكنك مراسلتنا على حسابنا في تويتر @anb_care شكرا لك.	2023-08-30 20:11:57	0	ar	us		1	ar	program open freeze need help issue invoice	Negative	0	1	1
Google Play Store	23a368bf-da77-4c34-8427-66972156756c	The application is bad, knowing that most of the users are elderly retirees. Every time it asks for access to the geographic location, even though it already has the ability to determine the location. The bank should quickly solve the problem and not respond with a request to access the link to solve the problem. The problem is clear, you just need to work properly.	درزي الحربي	2023-08-28 20:21:08	نعتذر للمشكلة التي واجهتك ونشكر لك ملاحظاتك لمساعدتك يرجى الاتصال بنا على 8001244040 او يمكنك مراسلتنا على حسابنا في تويتر @anb_care شكرا لك.	2023-08-30 20:12:16	0	ar	us		1	ar	application bad know users elderly retire every time ask access geographic location even though already ability determine location bank quickly solve problem respond request access link solve problem problem clear need work properly	Negative	1	1	0
Google Play Store	fb621269-f0b6-4153-8078-94e7c96a55dc	The worst thing in the universe after black holes.	منطقة الشفق The Twilight Zone	2023-08-28 18:12:45	نعتذر للمشكلة التي واجهتك ونشكر لك ملاحظاتك لمساعدتك يرجى الاتصال بنا على 8001244040 او يمكنك مراسلتنا على حسابنا في تويتر @anb_care شكرا لك.	2023-08-30 20:12:26	0	ar	us		1	ar	bad thing universe black hole	Negative	1	0	0
Google Play Store	de40c2d1-2efa-4717-b825-4b23e2b17f7c	What is the problem with location tracking?	حسين الزيلعي	2023-08-28 14:04:55	نعتذر للمشكلة التي واجهتك ونشكر لك ملاحظاتك لمساعدتك يرجى الاتصال بنا على 8001244040 او يمكنك مراسلتنا على حسابنا في تويتر @anb_care شكرا لك.	2023-08-30 20:12:42	0	ar	us		1	ar	problem location track	Negative	0	1	0
Google Play Store	7c80538e-9be4-4da9-970a-0537450d3e28	It requires determining the location and your situation is unbelievably bad.	Halym Halym	2023-08-28 11:15:30	نعتذر للمشكلة التي واجهتك ونشكر لك ملاحظاتك لمساعدتك يرجى الاتصال بنا على 8001244040 او يمكنك مراسلتنا على حسابنا في تويتر @anb_care شكرا لك.	2023-08-30 20:11:07	0	ar	us		1	ar	require determine location situation unbelievably bad	Negative	1	0	0
Google Play Store	81bd967c-f2cc-4df8-9f35-37441f650757	What is the purpose of making location services compulsory through the application? Why a government application like Tawakkalna, for example? Are you a security entity? Come on, locate us and your application is still hanging and not allowing us to finish our tasks. The purpose of technology is to facilitate life, not complicate it.	Shosho Fa	2023-08-28 10:47:06	نعتذر للمشكلة التي واجهتك ونشكر لك ملاحظاتك لمساعدتك يرجى الاتصال بنا على 8001244040 او يمكنك مراسلتنا على حسابنا في تويتر @anb_care شكرا لك.	2023-08-30 20:11:17	0	ar	us		1	ar	purpose make location service compulsory application government application like tawakkalna example security entity come locate us application still hang allow us finish task purpose technology facilitate life complicate	Negative	1	1	1
Google Play Store	25d9d094-1082-477c-88b9-b0122802e695	The latest update is not good, it asks to open the website despite already opening the location on the mobile.	محمود النجم	2023-08-28 10:20:17	نعتذر للمشكلة التي واجهتك ونشكر لك ملاحظاتك لمساعدتك يرجى الاتصال بنا على 8001244040 او يمكنك مراسلتنا على حسابنا في تويتر @anb_care شكرا لك.	2023-08-30 20:18:41	0	ar	us		2	ar	late update good ask open website despite already open location mobile	Negative	0	1	0
Google Play Store	66c42028-cd78-4e53-aedc-4224b2b00d9e	Excellent, may Allah bless you.	Aaa A	2023-08-28 10:05:50	نحن سعيدين بمشاركتنا رأيك وتجربتك معنا. شكرا لك	2023-08-30 20:14:14	0	ar	us		5	ar	excellent may allah bless	Positive	1	0	0
Google Play Store	56123769-e0ea-44b8-ba1a-635b1b6fe6f2	This is still the first time.	ابوغلا الهوساوي	2023-08-28 09:03:10	شكرا لك سوف يتم اخذ ملاحظتك بعين الاعتبار ، نتطلع لرؤيتك مجددا. شكرا لزيارتك.	2023-08-30 20:17:51	0	ar	us		4	ar	still first time	Neutral	0	0	0
Google Play Store	7950b695-7861-49ef-b51e-d153c91a7d73	The application has been bothering me a lot by requesting location activation, even though it is already set on the location detection mode. Find a solution for yourselves, as I am unable to perform any online transactions.	abujalil abujalil	2023-08-28 08:28:30	نعتذر للمشكلة التي واجهتك ونشكر لك ملاحظاتك لمساعدتك يرجى الاتصال بنا على 8001244040 او يمكنك مراسلتنا على حسابنا في تويتر @anb_care شكرا لك.	2023-08-30 20:18:14	0	ar	us		2	ar	application bother lot request location activation even though already set location detection mode find solution unable perform online transactions	Negative	0	1	0
Google Play Store	065f3a7d-a4c5-43bb-93a8-ab45dc2ffc1c	It does not open.	مرتضي عبدالله ابشر	2023-08-27 19:13:57	نحن سعيدين بمشاركتنا رأيك وتجربتك معنا. شكرا لك	2023-08-30 20:14:53	0	ar	us		5	ar	open	Neutral	0	1	0
Google Play Store	dbebf50e-23a2-4eb6-ae1c-b0e0b466a0ac	The bad system does not send the service activation number until after exiting the system. Customers do not benefit from it.	ابوعبدالله 1378 المالكي	2023-08-27 15:30:10	نحن سعيدين بمشاركتنا رأيك وتجربتك معنا. شكرا لك	2023-07-02 10:17:26	1	ar	us		1	ar	bad system send service activation number exit system customers benefit	Negative	1	1	0
Google Play Store	20f3a345-6a33-4c7e-b7cd-4bf0dfe8d102	The star is plentiful, my father always delights in its services, constantly coming down.	Ali Alabbadi	2023-08-27 14:18:38	نعتذر للمشكلة التي واجهتك ونشكر لك ملاحظاتك لمساعدتك يرجى الاتصال بنا على 8001244040 او يمكنك مراسلتنا على حسابنا في تويتر @anb_care شكرا لك.	2023-08-30 20:10:09	0	ar	us		1	ar	star plentiful father always delight service constantly come	Positive	1	0	0
Google Play Store	9fde2bd0-3f68-4a08-8f00-c19ccb04d29e	Unfortunately, the application is the worst. I wanted to add a beneficiary but I couldn't, and I am soon going to cancel my account. 👎👎👎	gray	2023-08-27 14:06:16	نعتذر للمشكلة التي واجهتك ونشكر لك ملاحظاتك لمساعدتك يرجى الاتصال بنا على 8001244040 او يمكنك مراسلتنا على حسابنا في تويتر @anb_care شكرا لك.	2023-08-30 20:10:24	0	ar	us		1	ar	unfortunately application bad want add beneficiary couldnt soon go cancel account	Negative	1	1	0
Google Play Store	91044418-5ff5-415a-b52d-af3e557f93fc	Dear ANB customer, please activate the location services by accessing the device settings to benefit from our digital services. I don't know how to solve the problem.	Ahmed Ab	2023-08-27 07:58:17	نعتذر للمشكلة التي واجهتك ونشكر لك ملاحظاتك لمساعدتك يرجى الاتصال بنا على 8001244040 او يمكنك مراسلتنا على حسابنا في تويتر @anb_care شكرا لك.	2023-08-30 20:10:35	0	ar	us		1	ar	dear anb customer please activate location service access device settings benefit digital service dont know solve problem	Negative	0	1	0
Google Play Store	3424082f-236f-4dc3-82ee-b93dbdfa5c0f	Your application is strange, it always shows that there is an update, but when searching through Google Play, you don't find any update for the application. So why does the repeated update message appear, and also there is a lack of smoothness in the application overall? You have to exit the program and then return again for it to return to its normal state. The problem is still the same since my…	مرحبا ألف	2023-08-27 04:10:34	نعتذر للمشكلة التي واجهتك ونشكر لك ملاحظاتك لمساعدتك يرجى مشاركتنا تفاصيل المشكلة التي واجهتك عبر الرابط https://anb.tw/3Vpq1cv شكرا لزيارتك.	2023-06-11 05:35:54	127	ar	us		2	ar	application strange always show update search google play dont find update application repeat update message appear also lack smoothness application overall exit program return return normal state problem still since previous review please solve problem	Negative	1	1	1
Google Play Store	fe375803-cbc8-4416-92e9-68b23aa49bf2	The application itself is a problem... and worse, they do not care about customer feedback or solving existing problems... they give the same response to all problems... most of the problems are clear and require urgent intervention... they ask the customer to contact them as if it is easy to reach them!!	محمد الزهراني	2023-08-27 02:00:23	نعتذر للمشكلة التي واجهتك ونشكر لك ملاحظاتك لمساعدتك يرجى الاتصال بنا على 8001244040 او يمكنك مراسلتنا على حسابنا في تويتر @anb_care شكرا لك.	2023-08-30 20:10:47	43	ar	us		1	ar	application problem bad care customer feedback solve exist problems give response problems problems clear require urgent intervention ask customer contact easy reach	Negative	1	0	0
Google Play Store	673e1d51-fcfd-4494-96ec-de35bd0dfeb6	Very bad.	Abdulrahman Owayyid	2023-08-26 13:08:38	نعتذر للمشكلة التي واجهتك ونشكر لك ملاحظاتك لمساعدتك يرجى الاتصال بنا على 8001244040 او يمكنك مراسلتنا على حسابنا في تويتر @anb_care شكرا لك.	2023-08-28 19:56:15	0	ar	us		1	ar	bad	Negative	1	0	0
Google Play Store	e85d5a35-72dc-4664-9c53-19b197ae614a	The application is not professional. Every service it provides is delayed, and the bank treats you as if you are a piece of furniture.	عبدالرحمن الزهراني	2023-08-26 08:54:23	نعتذر للمشكلة التي واجهتك ونشكر لك ملاحظاتك لمساعدتك يرجى الاتصال بنا على 8001244040 او يمكنك مراسلتنا على حسابنا في تويتر @anb_care شكرا لك.	2023-08-28 19:55:44	0	ar	us		1	ar	application professional every service provide delay bank treat piece furniture	Negative	1	0	1
Google Play Store	b68e070d-037d-408d-98eb-d5a550e917f8	Excellent and very good.	Gu Gyy	2023-08-25 19:11:43	نحن سعيدين بمشاركتنا رأيك وتجربتك معنا. شكرا لك	2023-08-28 19:54:53	0	ar	us		5	ar	excellent good	Positive	0	0	0
Google Play Store	76340898-e1c0-401b-be61-4b1b3ed0ad29	More than wonderful and providing all the services.	ام سلطان	2023-08-25 16:34:58	نحن سعيدين بمشاركتنا رأيك وتجربتك معنا. شكرا لك	2023-08-28 19:54:02	0	ar	us		5	ar	wonderful provide service	Positive	0	0	0
Google Play Store	2e3863b8-af73-4d72-8f70-8d88ad44be50	the worst application for three days, I am unable to access my account.	ABO NAEF VIP	2023-08-24 21:59:06	نعتذر للمشكلة التي واجهتك ونشكر لك ملاحظاتك لمساعدتك يرجى الاتصال بنا على 8001244040 او يمكنك مراسلتنا على حسابنا في تويتر @anb_care شكرا لك.	2023-08-28 19:53:37	0	ar	us		1	ar	bad application three days unable access account	Negative	1	1	0
Google Play Store	35ecf09b-f104-4f4b-a9b1-11890f162ed3	The application asks for location detection, noting that the location has been determined, but the application is unsuccessful.	اسامه اليوبي	2023-08-24 10:59:24	نعتذر للمشكلة التي واجهتك ونشكر لك ملاحظاتك لمساعدتك يرجى الاتصال بنا على 8001244040 او يمكنك مراسلتنا على حسابنا في تويتر @anb_care شكرا لك.	2023-08-28 19:52:34	0	ar	us		1	ar	application ask location detection note location determine application unsuccessful	Negative	1	0	0
Google Play Store	256e299c-0e81-41e5-aaa5-17f6aaa39c2d	Old bank	hasan abo azeez	2023-08-24 03:33:13	نعتذر للمشكلة التي واجهتك ونشكر لك ملاحظاتك لمساعدتك يرجى الاتصال بنا على 8001244040 او يمكنك مراسلتنا على حسابنا في تويتر @anb_care شكرا لك.	2023-08-28 19:57:36	0	ar	us		1	ar	old bank	Neutral	1	0	0
Google Play Store	7d38c5a9-e875-479c-99d5-bb75768e3cad	Very bad application due to its lack of development, especially when logging into it, as it does not easily recognize devices and it saves old devices. In the case of formatting any device, it considers that I have exceeded the number of devices. It also forces you to specify your location, and most importantly, they do not take user feedback into consideration. It is strange that the rating is 3…	Ali Alshehri	2023-08-24 03:08:30	نعتذر للمشكلة التي واجهتك ونشكر لك ملاحظاتك لمساعدتك يرجى الاتصال بنا على 8001244040 او يمكنك مراسلتنا على حسابنا في تويتر @anb_care شكرا لك.	2023-08-28 19:57:51	6	ar	us		1	ar	bad application due lack development especially log easily recognize devices save old devices case format device consider exceed number devices also force specify location importantly take user feedback consideration strange rat give one person give star	Negative	1	1	0
Google Play Store	1c3defb7-fb14-440b-823d-86a08a9ec470	Today's update requests to open the website and does not respond despite opening the website and granting permission on my Huawei P30 Pro. Please solve the problem quickly.	mohamed ghonim	2023-08-23 17:23:06	نعتذر للمشكلة التي واجهتك ونشكر لك ملاحظاتك لمساعدتك يرجى مشاركتنا تفاصيل المشكلة التي واجهتك عبر الرابط https://anb.tw/3Vpq1cv شكرا لزيارتك.	2023-08-27 04:35:17	28	ar	us		3	ar	todays update request open website respond despite open website grant permission huawei p pro please solve problem quickly	Negative	0	1	0
Google Play Store	74b4c779-ee30-45ed-85ab-6b5e6f6f7a3b	The application is very bad.	A A	2023-08-23 15:02:25	نعتذر للمشكلة التي واجهتك ونشكر لك ملاحظاتك لمساعدتك يرجى مشاركتنا تفاصيل المشكلة التي واجهتك عبر الرابط https://anb.tw/3Vpq1cv شكرا لزيارتك.	2023-08-27 04:35:09	0	ar	us		1	ar	application bad	Negative	1	0	0
Google Play Store	dc5a4157-2d21-434c-8729-49eff01f23b3	The application requests permission for location and it has already been granted permission, but access is being denied.	Mostafa A Motawakel	2023-08-23 11:08:10	نعتذر للمشكلة التي واجهتك ونشكر لك ملاحظاتك لمساعدتك يرجى مشاركتنا تفاصيل المشكلة التي واجهتك عبر الرابط https://anb.tw/3Vpq1cv شكرا لزيارتك.	2023-08-27 04:35:00	0	ar	us		1	ar	application request permission location already grant permission access deny	Neutral	0	1	0
Google Play Store	2d3f3fc8-85df-4821-bfdc-3146b618564d	Very very very bad.	Walid Salman	2023-08-22 14:12:18	نعتذر للمشكلة التي واجهتك ونشكر لك ملاحظاتك لمساعدتك يرجى مشاركتنا تفاصيل المشكلة التي واجهتك عبر الرابط https://anb.tw/3Vpq1cv شكرا لزيارتك.	2023-08-27 04:33:44	0	ar	us		1	ar	bad	Negative	1	0	0
Google Play Store	6ee5a72b-b68d-4920-b4d0-3f251ede9dcd	Honestly, the application has become bad after adding mandatory location tracking. Even when I open the app, it keeps asking for location tracking even though the location is already enabled. We can't complete any processes because of this.	معتز العمري	2023-08-22 13:58:47	نعتذر للمشكلة التي واجهتك ونشكر لك ملاحظاتك لمساعدتك يرجى مشاركتنا تفاصيل المشكلة التي واجهتك عبر الرابط https://anb.tw/3Vpq1cv شكرا لزيارتك.	2023-08-27 04:33:37	3	ar	us		1	ar	honestly application become bad add mandatory location track even open app keep ask location track even though location already enable cant complete process	Negative	1	1	0
Google Play Store	42b97027-19ac-47a2-bb16-b8f2094501a8	saffAF	بندر السلمي	2023-08-20 18:00:35	نعتذر للمشكلة التي واجهتك ونشكر لك ملاحظاتك لمساعدتك يرجى مشاركتنا تفاصيل المشكلة التي واجهتك عبر الرابط https://anb.tw/3Vpq1cv شكرا لزيارتك.	2023-08-22 07:09:39	0	ar	us		1	ar	saffaf	Neutral	0	0	0
Google Play Store	3329a904-1211-4eb3-a0f1-d1f6ae81b164	A terrible experience.	السعيد سعيدان	2023-08-20 15:57:06	نعتذر للمشكلة التي واجهتك ونشكر لك ملاحظاتك لمساعدتك يرجى مشاركتنا تفاصيل المشكلة التي واجهتك عبر الرابط https://anb.tw/3Vpq1cv شكرا لزيارتك.	2023-08-22 07:09:47	0	ar	us		1	ar	terrible experience	Negative	1	0	0
Google Play Store	66955e62-6045-4a1a-a2d4-f4d64e98bd1d	Excellent very much	Abdullah A.lksaab	2023-08-20 14:31:27	نحن سعيدين بمشاركتنا رأيك وتجربتك معنا. شكرا لك	2023-08-22 07:10:08	0	ar	us		5	ar	excellent much	Positive	0	0	0
Google Play Store	37dd579a-6a56-4428-a752-bb205740de68	There is no solution either in the application or in the connection, and there is no way to solve the problem quickly. There are no solutions at all. 😡	ابو احمد العسيري	2023-08-20 09:53:15	نعتذر للمشكلة التي واجهتك ونشكر لك ملاحظاتك لمساعدتك يرجى مشاركتنا تفاصيل المشكلة التي واجهتك عبر الرابط https://anb.tw/3Vpq1cv شكرا لزيارتك.	2023-08-22 07:10:51	0	ar	us		1	ar	solution either application connection way solve problem quickly solutions	Negative	0	1	0
Google Play Store	942e6f61-d85f-4dc3-9685-49bb0ba17933	The application is terrible, I advise everyone not to download it. Why would you pay for an application that is not as good as Al Rajhi Bank?	عبدالرحمن الشيخي	2023-08-19 14:54:55	نعتذر للمشكلة التي واجهتك ونشكر لك ملاحظاتك لمساعدتك يرجى مشاركتنا تفاصيل المشكلة التي واجهتك عبر الرابط https://anb.tw/3Vpq1cv شكرا لزيارتك.	2023-08-22 07:09:04	0	ar	us		1	ar	application terrible advise everyone download would pay application good al rajhi bank	Negative	1	1	0
Google Play Store	908a13cd-3e72-418e-aed7-fc4e3ec04137	The application is very very bad.	بدر البدر	2023-08-18 12:45:42	نعتذر للمشكلة التي واجهتك ونشكر لك ملاحظاتك لمساعدتك يرجى مشاركتنا تفاصيل المشكلة التي واجهتك عبر الرابط https://anb.tw/3Vpq1cv شكرا لزيارتك.	2023-08-22 07:08:31	0	ar	us		1	ar	application bad	Negative	1	0	0
Google Play Store	89586eb7-dd3a-406e-9a42-6ddc6356d3d7	I face a problem in making an international transfer. Whenever I reach the last step, I agree to the terms and conditions, but when it comes to the cancellation word, I am unable to proceed.	Mohammed Idres	2023-08-18 10:02:33	نعتذر للمشكلة التي واجهتك ونشكر لك ملاحظاتك لمساعدتك يرجى مشاركتنا تفاصيل المشكلة التي واجهتك عبر الرابط https://anb.tw/3Vpq1cv شكرا لزيارتك.	2023-08-22 07:08:24	0	ar	us		5	ar	face problem make international transfer whenever reach last step agree term condition come cancellation word unable proceed	Negative	0	1	0
Google Play Store	18cd4130-0fe6-40cf-b3c7-cc37784481a7	A star and abundant in it .. It is not possible to add a beneficiary permanently .. I deleted it and reloaded it more than once in all cases .. I have exceeded the daily limit for adding a beneficiary today.	Saeed Alzahrani	2023-08-17 13:39:02	نعتذر للمشكلة التي واجهتك ونشكر لك ملاحظاتك لمساعدتك يرجى مشاركتنا تفاصيل المشكلة التي واجهتك عبر الرابط https://anb.tw/3Vpq1cv شكرا لزيارتك.	2023-08-20 08:46:01	50	ar	us		1	ar	star abundant possible add beneficiary permanently delete reload case exceed daily limit add beneficiary today	Negative	0	1	0
Google Play Store	5995f125-b9e6-48e5-aea6-0eb7fbaef7d4	Excellent very very much	ابو محمد الغامدي	2023-08-17 13:33:56	نحن سعيدين بمشاركتنا رأيك وتجربتك معنا. شكرا لك	2023-08-20 08:45:48	0	ar	us		5	ar	excellent much	Positive	0	0	0
Google Play Store	bbacaeed-04a0-42b5-a64b-07975b5f0b23	There is no online personal data update.	Ro Ro	2023-08-17 01:27:24	نعتذر للمشكلة التي واجهتك ونشكر لك ملاحظاتك لمساعدتك يرجى مشاركتنا تفاصيل المشكلة التي واجهتك عبر الرابط https://anb.tw/3Vpq1cv شكرا لزيارتك.	2023-08-20 08:44:41	1	ar	us		1	ar	online personal data update	Neutral	0	1	0
Google Play Store	32f73994-36a3-4edc-ae07-d027a14b9af9	One of the best banks to deal with, they are distinguished by the best return on international purchases with the credit card.	الدرر	2023-08-16 16:18:56	نحن سعيدين بمشاركتنا رأيك وتجربتك معنا. شكرا لك	2023-08-20 08:44:16	0	ar	us		5	ar	one best bank deal distinguish best return international purchase credit card	Positive	0	0	0
Google Play Store	8a8aac97-ecd3-4c69-89c2-23b7b8b77447	Excellent experience.	فيصل محمد	2023-08-16 14:28:26	نحن سعيدين بمشاركتنا رأيك وتجربتك معنا. شكرا لك	2023-08-20 08:42:20	0	ar	us		4	ar	excellent experience	Positive	0	0	0
Google Play Store	78174256-eb67-404a-a0d1-78ce455c2ae0	The program is not working well.	راجية الجنة	2023-08-16 04:53:23	نعتذر للمشكلة التي واجهتك ونشكر لك ملاحظاتك لمساعدتك يرجى مشاركتنا تفاصيل المشكلة التي واجهتك عبر الرابط https://anb.tw/3Vpq1cv شكرا لزيارتك.	2023-08-20 08:40:50	0	ar	us		1	ar	program work well	Negative	0	1	0
Google Play Store	c61a287e-c219-430c-9f26-fa44b1213135	"The application is the worst and a waste of time. The previous version was much better than this. I am only giving one star for the review."	حابر الزهراني	2023-08-15 19:12:12	نعتذر للمشكلة التي واجهتك ونشكر لك ملاحظاتك لمساعدتك يرجى مشاركتنا تفاصيل المشكلة التي واجهتك عبر الرابط https://anb.tw/3Vpq1cv شكرا لزيارتك.	2023-08-20 05:33:15	7	ar	us		5	ar	application bad waste time previous version much good give one star review	Negative	1	0	1
Google Play Store	70007335-4da1-4bc6-a477-bfea2eb7bd21	Beautiful.	balqees 2008	2023-08-15 18:52:33	نحن سعيدين بمشاركتنا رأيك وتجربتك معنا. شكرا لك	2023-08-20 05:33:27	0	ar	us		5	ar	beautiful	Positive	0	0	0
Google Play Store	20af1ce9-c8cf-4343-a5ce-4f4a28538154	Wonderful	Saud سعود Ezaya عزايه	2023-08-15 15:43:43	نحن سعيدين بمشاركتنا رأيك وتجربتك معنا. شكرا لك	2023-08-20 05:34:03	3	ar	us		5	ar	wonderful	Positive	0	0	0
Google Play Store	a5cd2368-e44e-4c40-97c1-2ee9f2a32141	Pain	رفعه القحطاني	2023-08-15 15:09:57	نعتذر للمشكلة التي واجهتك ونشكر لك ملاحظاتك لمساعدتك يرجى مشاركتنا تفاصيل المشكلة التي واجهتك عبر الرابط https://anb.tw/3Vpq1cv شكرا لزيارتك.	2023-08-20 05:34:17	0	ar	us		5	ar	pain	Negative	1	0	0
Google Play Store	6c457dfb-15d5-4d03-b84e-fd1684722fb8	Every time I enter the application, it asks for permission to access the geolocation, even though it is open and does not allow me to perform any service.	Abdullah FH	2023-08-15 13:20:52	نعتذر للمشكلة التي واجهتك ونشكر لك ملاحظاتك لمساعدتك يرجى مشاركتنا تفاصيل المشكلة التي واجهتك عبر الرابط https://anb.tw/3Vpq1cv شكرا لزيارتك.	2023-08-20 05:34:35	7	ar	us		2	ar	every time enter application ask permission access geolocation even though open allow perform service	Negative	0	1	0
Google Play Store	c180af16-08ae-4663-ab1e-74f18430c262	The application requests an update and when entering, there is no update.	Mohammed Aldosary	2023-08-15 11:27:40	نعتذر للمشكلة التي واجهتك ونشكر لك ملاحظاتك لمساعدتك يرجى مشاركتنا تفاصيل المشكلة التي واجهتك عبر الرابط https://anb.tw/3Vpq1cv شكرا لزيارتك.	2023-08-20 05:31:38	0	ar	us		4	ar	application request update enter update	Negative	0	1	0
Google Play Store	bf2a1efd-b441-4866-afa3-30145dd582d2	"The application is closed. I tried to register for a month, but it doesn't open an account."	أبو يحيى الشوكاني	2023-08-15 10:56:22	نعتذر للمشكلة التي واجهتك ونشكر لك ملاحظاتك لمساعدتك يرجى مشاركتنا تفاصيل المشكلة التي واجهتك عبر الرابط https://anb.tw/3Vpq1cv شكرا لزيارتك.	2023-08-20 05:32:23	0	ar	us		2	ar	application close try register month doesnt open account	Negative	0	1	0
Google Play Store	bfbdbe0a-49cc-44cc-96af-3b25049c0d9d	More progress, prosperity, and success, God willing.	Mohd Fathi	2023-08-15 09:56:54			0	ar	us		4	ar	progress prosperity success god will	Positive	0	0	0
Google Play Store	cc6d14b1-3ad9-43ba-bc0a-a85795f70eb7	The application is bad; every time I enter it, it asks for an update.	عبدالله العنزي	2023-08-15 08:31:40	نعتذر للمشكلة التي واجهتك ونشكر لك ملاحظاتك لمساعدتك يرجى مشاركتنا تفاصيل المشكلة التي واجهتك عبر الرابط https://anb.tw/3Vpq1cv شكرا لزيارتك.	2023-08-20 05:32:37	0	ar	us		1	ar	application bad every time enter ask update	Negative	1	1	0
Google Play Store	e51edae1-0150-4940-9d23-98e0e0c31849	There is a problem with the update.	yehia abu sultan	2023-08-15 07:41:35	نعتذر للمشكلة التي واجهتك ونشكر لك ملاحظاتك لمساعدتك يرجى مشاركتنا تفاصيل المشكلة التي واجهتك عبر الرابط https://anb.tw/3Vpq1cv شكرا لزيارتك.	2023-08-20 05:32:49	0	ar	us		5	ar	problem update	Negative	0	1	0
Google Play Store	6db95201-9b3d-4b6e-8f53-603c317f2f6e	Forcing users to enable location tracking is very, very, very bad. It means that the user is forced to compromise their privacy in order to access their account. Location tracking should not be done by you, a government entity in Saudi Arabia, or even by Google. This should be an optional feature and should not inconvenience the customer.	Rose Hinde	2023-08-15 02:11:48	نعتذر للمشكلة التي واجهتك ونشكر لك ملاحظاتك لمساعدتك يرجى مشاركتنا تفاصيل المشكلة التي واجهتك عبر الرابط https://anb.tw/3Vpq1cv شكرا لزيارتك.	2023-08-20 05:30:56	22	ar	us		1	ar	force users enable location track bad mean user force compromise privacy order access account location track do government entity saudi arabia even google optional feature inconvenience customer	Negative	1	1	0
Google Play Store	856dd0eb-fb96-4003-8a13-a78604db921d	The application "Kalmat" is a little bit of the worst with a mess in the updates. Documentation, especially quick login, is lacking.	فيصل	2023-08-14 16:47:54	نعتذر للمشكلة التي واجهتك ونشكر لك ملاحظاتك لمساعدتك يرجى مشاركتنا تفاصيل المشكلة التي واجهتك عبر الرابط https://anb.tw/3Vpq1cv شكرا لزيارتك.	2023-08-16 04:39:12	0	ar	us		1	ar	application kalmat little bite bad mess update documentation especially quick login lack	Negative	1	1	0
Google Play Store	96c87960-be8c-4a24-ade3-a47bc33a6a54	Unfortunately, after updating the appearance of the application, whenever I try to open it, it always asks me to activate the location, even though I have already activated it. The application also does not open with Google services support. It's very bad.	Hadi	2023-08-14 16:40:02	نعتذر للمشكلة التي واجهتك ونشكر لك ملاحظاتك لمساعدتك يرجى مشاركتنا تفاصيل المشكلة التي واجهتك عبر الرابط https://anb.tw/3Vpq1cv شكرا لزيارتك.	2023-08-16 04:39:02	3	ar	us		2	ar	unfortunately update appearance application whenever try open always ask activate location even though already activate application also open google service support bad	Negative	1	1	0
Google Play Store	bdee442f-0764-45f6-be44-7af9fd309030	Hello, may peace, mercy, and blessings of Allah be upon you. I was searching for the Arab Bank's application to download, but I was surprised to find out that customers are facing problems with the application and they haven't been resolved. Does this bank, known as the Pensioners Bank, still maintain its reputation? I am truly astonished by these observations and the negative reviews of a bank t…	أسير المعروف	2023-08-13 14:22:34	نعتذر للمشكلة التي واجهتك ونشكر لك ملاحظاتك لمساعدتك يرجى مشاركتنا تفاصيل المشكلة التي واجهتك عبر الرابط https://anb.tw/3Vpq1cv شكرا لزيارتك.	2023-08-16 04:38:02	0	ar	us		1	ar	hello may peace mercy blessings allah upon search arab bank application download surprise find customers face problems application havent resolve bank know pensioners bank still maintain reputation truly astonish observations negative review bank employ competent professionals young talents especially existence electronic technology field vision royal highness prince mohammed bin salman may allah…	Neutral	1	0	0
Google Play Store	d20b058e-ade4-4a67-b4e9-1758d30319b7	Does not work with location request.	جنات علي	2023-08-13 12:27:33	نعتذر للمشكلة التي واجهتك ونشكر لك ملاحظاتك لمساعدتك يرجى مشاركتنا تفاصيل المشكلة التي واجهتك عبر الرابط https://anb.tw/3Vpq1cv شكرا لزيارتك.	2023-08-16 04:37:51	0	ar	us		2	ar	work location request	Negative	0	1	0
Google Play Store	25f8120b-0535-4e81-9cdf-f0492e5550ad	This is a very, very, very bad application. I'm telling you, the website doesn't work either and there's no benefit to it.	صديق بقدونس	2023-08-13 05:59:56	نعتذر للمشكلة التي واجهتك ونشكر لك ملاحظاتك لمساعدتك يرجى مشاركتنا تفاصيل المشكلة التي واجهتك عبر الرابط https://anb.tw/3Vpq1cv شكرا لزيارتك.	2023-08-16 04:37:41	0	ar	us		1	ar	bad application im tell website doesnt work either theres benefit	Negative	1	1	0
Google Play Store	f8f0d253-2478-4dc2-8638-a07deac928d9	We kindly request the addition of some services that are not available, such as updating identification through the application and other things.	marwanalic	2023-08-12 22:14:06	شكرا لك سوف يتم اخذ ملاحظتك بعين الاعتبار ، نتطلع لرؤيتك مجددا. شكرا لزيارتك.	2023-08-16 04:37:08	0	ar	us		4	ar	kindly request addition service available update identification application things	Neutral	0	1	0
Google Play Store	d7d0bbf8-28c4-4ff8-81a6-f6d09072fc2c	Oh brother, the bank is raising my blood pressure. What's going on with you guys? After that, I receive a transfer message and the amount is deducted from my account, then another message comes saying the transaction is rejected, and the problem is that the transferred money doesn't return. I have to contact them and explain the issue to them.	-__{ALQAHTANI-__{3 AOAD	2023-08-12 05:43:48	نعتذر للمشكلة التي واجهتك ونشكر لك ملاحظاتك لمساعدتك يرجى مشاركتنا تفاصيل المشكلة التي واجهتك عبر الرابط https://anb.tw/3Vpq1cv شكرا لزيارتك.	2023-08-16 04:36:49	0	ar	us		1	ar	oh brother bank raise blood pressure whats go guy receive transfer message amount deduct account another message come say transaction reject problem transfer money doesnt return contact explain issue	Negative	1	1	0
Google Play Store	01091498-3c08-4bb4-bb20-ae5d64080bc6	The best program for the past 5 consecutive years in Saudi Arabia.	‪Wanes Alwanes (‫ونيس‬‎)‬‏	2023-08-11 17:03:10	نحن سعيدين بمشاركتنا رأيك وتجربتك معنا. شكرا لك	2023-08-13 05:16:20	0	ar	us		5	ar	best program past consecutive years saudi arabia	Positive	0	0	0
Google Play Store	18e73822-aac9-4ae0-b0bb-81b3c87317ad	Beneficiaries are not being added. Please solve the problem.	علي ال بواح	2023-08-07 14:14:31	نعتذر للمشكلة التي واجهتك ونشكر لك ملاحظاتك لمساعدتك يرجى مشاركتنا تفاصيل المشكلة التي واجهتك عبر الرابط https://anb.tw/3Vpq1cv شكرا لزيارتك.	2023-08-10 05:46:12	0	ar	us		1	ar	beneficiaries add please solve problem	Negative	0	1	0
Google Play Store	24077c92-ea12-4263-ac5e-c368fe27ea3f	The worst application I have used is the one used by other banks. Their applications are better. For three days, I've been trying to do something with my card, but the system is telling me that the bank is facing technical issues. By God, the bank's system has been down for three days.	moory _911	2023-08-06 22:10:19	نعتذر للمشكلة التي واجهتك ونشكر لك ملاحظاتك لمساعدتك يرجى مشاركتنا تفاصيل المشكلة التي واجهتك عبر الرابط https://anb.tw/3Vpq1cv شكرا لزيارتك.	2023-08-10 05:45:36	1	ar	us		1	ar	bad application use one use bank applications good three days ive try something card system tell bank face technical issue god bank system three days	Negative	1	1	0
Google Play Store	9489a9f6-2ca2-4291-a783-71b41f235f3a	The user's status is sometimes inactive, sometimes the number is incorrect, sometimes it doesn't open, and sometimes there are many problems with this application.	رحاب الحربي	2023-08-06 13:52:34	نعتذر للمشكلة التي واجهتك ونشكر لك ملاحظاتك لمساعدتك يرجى مشاركتنا تفاصيل المشكلة التي واجهتك عبر الرابط https://anb.tw/3Vpq1cv شكرا لزيارتك.	2023-08-10 05:44:48	0	ar	us		1	ar	users status sometimes inactive sometimes number incorrect sometimes doesnt open sometimes many problems application	Negative	0	1	1
Google Play Store	bcd28d5b-e52e-401e-9a93-3e6c420f52fc	Excellent and amazing.	M.d Bcg	2023-08-03 07:52:36	نحن سعيدين بمشاركتنا رأيك وتجربتك معنا. شكرا لك	2023-08-09 12:11:27	0	ar	us		5	ar	excellent amaze	Positive	0	0	0
Google Play Store	1c2a2b22-28d6-4e1d-9f34-605f575b3682	This is quite annoying! Seriously, imagine, I enter my correct phone number and it tells me that this phone is not registered and is incorrect.	Sabry shawky	2023-08-02 20:51:33	نعتذر للمشكلة التي واجهتك ونشكر لك ملاحظاتك لمساعدتك يرجى مشاركتنا تفاصيل المشكلة التي واجهتك عبر الرابط https://anb.tw/3Vpq1cv شكرا لزيارتك.	2023-07-26 08:38:35	0	ar	us		1	ar	quite annoy seriously imagine enter correct phone number tell phone register incorrect	Negative	1	1	0
Google Play Store	a6d0253e-75fc-4268-a182-6969a4a8c328	Feeling tired and needs improvement.	الشمري ابو بدر	2023-08-02 20:07:37	نعتذر للمشكلة التي واجهتك ونشكر لك ملاحظاتك لمساعدتك يرجى مشاركتنا تفاصيل المشكلة التي واجهتك عبر الرابط https://anb.tw/3Vpq1cv شكرا لزيارتك.	2023-08-09 12:11:56	0	ar	us		2	ar	feel tire need improvement	Negative	1	0	0
Google Play Store	05ee9e09-eac1-4f7a-864e-b8220a1b7d67	Beauty	سمير Samir	2023-08-02 20:01:36	نحن سعيدين بمشاركتنا رأيك وتجربتك معنا. شكرا لك	2023-08-09 12:11:42	0	ar	us		5	ar	beauty	Positive	0	0	0
Google Play Store	ddad0b44-0f8c-4d9f-9218-62ac5685dd18	It always opens and requests location, and the location is working.	محمد صالح	2023-08-02 12:00:36	نعتذر للمشكلة التي واجهتك ونشكر لك ملاحظاتك لمساعدتك يرجى مشاركتنا تفاصيل المشكلة التي واجهتك عبر الرابط https://anb.tw/3Vpq1cv شكرا لزيارتك.	2023-08-06 06:05:22	0	ar	us		1	ar	always open request location location work	Positive	0	1	0
Google Play Store	020c795a-cd76-4cd5-9885-938b160c4dda	I have a problem with the application for five days. I want to enter the application, but it refuses and a message appears stating that I have exceeded the number of verified devices, and I only have two devices. Please solve the problem as soon as possible.	مبارك القحطاني	2023-08-01 12:35:43	نعتذر للمشكلة التي واجهتك ونشكر لك ملاحظاتك لمساعدتك يرجى مشاركتنا تفاصيل المشكلة التي واجهتك عبر الرابط https://anb.tw/3Vpq1cv شكرا لزيارتك.	2023-08-06 06:06:02	1	ar	us		3	ar	problem application five days want enter application refuse message appear state exceed number verify devices two devices please solve problem soon possible	Negative	0	1	0
Google Play Store	e260b18a-56d6-4d10-94b2-c1c4bd6bb74d	If there was less than one star, I would rate the application as extremely bad. I cannot transfer any beneficiary from it to any account. Every time I try to activate an account, a message appears saying that I have exceeded the number of beneficiaries, even though I couldn't activate any beneficiary in the first place.	زكي المشعل	2023-07-31 22:13:02	نعتذر للمشكلة التي واجهتك ونشكر لك ملاحظاتك لمساعدتك يرجى مشاركتنا تفاصيل المشكلة التي واجهتك عبر الرابط https://anb.tw/3Vpq1cv شكرا لزيارتك.	2023-08-06 06:06:09	1	ar	us		1	ar	less one star would rate application extremely bad transfer beneficiary account every time try activate account message appear say exceed number beneficiaries even though couldnt activate beneficiary first place	Negative	1	1	0
Google Play Store	da892191-7c97-417b-815b-f15f909264ba	I received a message on my email, but the verification message did not reach my number. I entered the link again and it said failed.	محمد المولد	2023-07-31 08:48:04	نعتذر للمشكلة التي واجهتك ونشكر لك ملاحظاتك لمساعدتك يرجى مشاركتنا تفاصيل المشكلة التي واجهتك عبر الرابط https://anb.tw/3Vpq1cv شكرا لزيارتك.	2023-08-06 06:03:18	0	ar	us		2	ar	receive message email verification message reach number enter link say fail	Negative	0	1	0
Google Play Store	deddd773-0de8-48fb-a020-989f4090d835	The application is not working properly. It requires location and the location is active, but the application cannot be used at all.	algohry sara	2023-07-31 07:28:57	نعتذر للمشكلة التي واجهتك ونشكر لك ملاحظاتك لمساعدتك يرجى مشاركتنا تفاصيل المشكلة التي واجهتك عبر الرابط https://anb.tw/3Vpq1cv شكرا لزيارتك.	2023-08-06 06:03:25	1	ar	us		1	ar	application work properly require location location active application use	Negative	1	0	0
Google Play Store	7c5bd473-f7bc-43a0-9a13-2d83abfcfb0b	The worst and most the worst application on the face of the Earth, it doesn't deserve even one star because it asks me to activate the location service even though the location service is working and all permissions are allowed and none of them were rejected. I have contacted the Arab Bank regarding this issue, but the problem still exists.	مصطفى شيخ صبح	2023-07-30 13:47:33	نعتذر للمشكلة التي واجهتك ونشكر لك ملاحظاتك لمساعدتك يرجى الاتصال بنا على 8001244040 او يمكنك مراسلتنا على حسابنا في تويتر @anb_care شكرا لك.	2023-08-01 11:34:40	4	ar	us		1	ar	bad bad application face earth doesnt deserve even one star ask activate location service even though location service work permissions allow none reject contact arab bank regard issue problem still exist	Negative	1	1	0
Google Play Store	e9bb5bcf-1931-49d5-af82-f53b3953493f	A very beautiful application.	عزيزه السلمي	2023-07-29 19:24:45	نحن سعيدين بمشاركتنا رأيك وتجربتك معنا. شكرا لك	2023-08-01 11:35:21	0	ar	us		5	ar	beautiful application	Positive	0	0	0
Google Play Store	01b87388-4c14-4d5e-819f-b203ae2b0b6d	I don't know why the website requires opening the application only after identifying the location, and this is annoying.	Huda 2	2023-07-29 19:04:47	نعتذر للمشكلة التي واجهتك ونشكر لك ملاحظاتك لمساعدتك يرجى الاتصال بنا على 8001244040 او يمكنك مراسلتنا على حسابنا في تويتر @anb_care شكرا لك.	2023-08-01 11:36:43	0	ar	us		1	ar	dont know website require open application identify location annoy	Negative	1	0	0
Google Play Store	f8c2e4d3-8d14-4282-8701-c339250ecf4a	"Your application is always hanging, bro. Don't think too much and don't invent anything. Look at Al-Ahli Bank's application and make it the same. It's easy and beautiful, and there are no issues. Its only problem is the update from 12 am to 3 am. Take care."	EMAD AL HARBI	2023-07-28 15:36:22	نعتذر للمشكلة التي واجهتك ونشكر لك ملاحظاتك لمساعدتك يرجى الاتصال بنا على 8001244040 او يمكنك مراسلتنا على حسابنا في تويتر @anb_care شكرا لك.	2023-08-01 11:37:31	0	ar	us		1	ar	application always hang bro dont think much dont invent anything look alahli bank application make easy beautiful issue problem update take care	Positive	1	1	1
Google Play Store	08fa53b0-8548-40cd-b339-464e2ce0792a	After the update, I have been unable to pay the bills. The authentication code arrives late, after the grace period for entering the authentication code, and sometimes it arrives hours later, unfortunately. Even the messages are not answered, and there is a lack of care for the customer. My problem has not been resolved for two months. The authentication code does not arrive on time for login, tr…	ألنشمي ابو ايمن	2023-07-27 18:34:42	نعتذر للمشكلة التي واجهتك ونشكر لك ملاحظاتك لمساعدتك يرجى مشاركتنا تفاصيل المشكلة التي واجهتك عبر الرابط https://anb.tw/3Vpq1cv شكرا لزيارتك.	2023-08-06 06:02:07	0	ar	us		1	ar	update unable pay bill authentication code arrive late grace period enter authentication code sometimes arrive hours late unfortunately even message answer lack care customer problem resolve two months authentication code arrive time login transfer bill payment	Negative	0	1	0
Google Play Store	353a6a55-8880-49ea-a140-bdfc6de1a98a	The latest update is bad. After entering, a notification appears to enable location and the location icon is open. Then, when I go inside the applications on the Arabic app, I select one of the location icons. Unfortunately, the notification appears again and I don't know the reason.	عدنان الحميد	2023-07-27 04:15:39	نعتذر للمشكلة التي واجهتك ونشكر لك ملاحظاتك لمساعدتك يرجى مشاركتنا تفاصيل المشكلة التي واجهتك عبر الرابط https://anb.tw/3Vpq1cv شكرا لزيارتك.	2023-07-30 11:09:22	0	ar	us		2	ar	late update bad enter notification appear enable location location icon open go inside applications arabic app select one location icons unfortunately notification appear dont know reason	Negative	1	1	0
Google Play Store	8a7fac6d-9a26-490a-bf92-99d5a6c2615a	He constantly complains about website activation, but the website is already functioning. The solution is unknown.	Sgeer Algafgi	2023-07-25 15:08:07	نعتذر للمشكلة التي واجهتك ونشكر لك ملاحظاتك لمساعدتك يرجى مشاركتنا تفاصيل المشكلة التي واجهتك عبر الرابط https://anb.tw/3Vpq1cv شكرا لزيارتك.	2023-07-30 11:08:34	0	ar	us		1	ar	constantly complain website activation website already function solution unknown	Negative	1	1	0
Google Play Store	8ac96119-be1e-4f63-b2b2-c9a5f9806a77	The application doesn't open, it shows a blue screen and the service is not available. When I called the bank, they said the application is working. What is the problem with you?	mohmmed alnasser	2023-07-25 12:13:43	نعتذر للمشكلة التي واجهتك ونشكر لك ملاحظاتك لمساعدتك يرجى مشاركتنا تفاصيل المشكلة التي واجهتك عبر الرابط https://anb.tw/3Vpq1cv شكرا لزيارتك.	2023-07-30 11:08:19	0	ar	us		1	ar	application doesnt open show blue screen service available call bank say application work problem	Negative	0	1	0
Google Play Store	c6ba7e52-5119-493e-8718-ef80e021f089	Every now and then, he asks me to turn on my location and I already have my location turned on. What a dumb application.	سلطان	2023-07-25 10:51:39	نعتذر للمشكلة التي واجهتك ونشكر لك ملاحظاتك لمساعدتك يرجى مشاركتنا تفاصيل المشكلة التي واجهتك عبر الرابط https://anb.tw/3Vpq1cv شكرا لزيارتك.	2023-07-30 11:07:56	0	ar	us		1	ar	every ask turn location already location turn dumb application	Negative	1	1	0
Google Play Store	a0be4826-e8dc-4316-9ca1-c52a321a3094	Unfortunately, the last step in opening a new account asks for the card number sent via mail, but no message has been received on the mail.	Kookaa Almutairi	2023-07-25 06:04:42	نعتذر للمشكلة التي واجهتك ونشكر لك ملاحظاتك لمساعدتك يرجى مشاركتنا تفاصيل المشكلة التي واجهتك عبر الرابط https://anb.tw/3Vpq1cv شكرا لزيارتك.	2023-07-31 09:01:37	0	ar	us		1	ar	unfortunately last step open new account ask card number send via mail message receive mail	Negative	1	1	0
Google Play Store	ee969ffe-b6b6-48f7-822d-5556fd964414	CC, CC, CC, and I'm thinking of canceling my account with them. Every time I want something, I have to go to the bank because the application never opens for me.	حنين السبيعي	2023-07-24 20:28:52	نعتذر للمشكلة التي واجهتك ونشكر لك ملاحظاتك لمساعدتك يرجى مشاركتنا تفاصيل المشكلة التي واجهتك عبر الرابط https://anb.tw/3Vpq1cv شكرا لزيارتك.	2023-07-30 11:07:42	0	ar	us		1	ar	cc cc cc im think cancel account every time want something go bank application never open	Negative	0	1	0
Google Play Store	af426507-d757-4b02-b132-599ebec0e0ec	Excellent application and excellent bank as well.	فراس feras	2023-07-24 15:20:51	نحن سعيدين بمشاركتنا رأيك وتجربتك معنا. شكرا لك	2023-07-26 08:35:34	0	ar	us		5	ar	excellent application excellent bank well	Positive	0	0	0
Google Play Store	d00aec48-4c0a-4838-98fb-57176a85bbf8	At first, I was afraid of the application, but after my experience and actual use of the application, it deserves five stars.	سراج المالكي	2023-07-19 22:58:31	نحن سعيدين بمشاركتنا رأيك وتجربتك معنا. شكرا لك	2023-07-23 06:26:17	0	ar	us		5	ar	first afraid application experience actual use application deserve five star	Positive	1	0	0
Google Play Store	472e7369-e0aa-45dd-9d64-0795d4fea53f	"The application is very poor and needs development. It was deleted after installation."	sa7ab tuu	2023-07-19 19:14:21	نعتذر للمشكلة التي واجهتك ونشكر لك ملاحظاتك لمساعدتك يرجى مشاركتنا تفاصيل المشكلة التي واجهتك عبر الرابط https://anb.tw/3Vpq1cv شكرا لزيارتك.	2023-07-23 06:25:58	0	ar	us		1	ar	application poor need development delete installation	Negative	1	1	0
Google Play Store	2da00181-deaf-4a53-9914-e595acc546d8	A program that serves the purpose and does not require going through branches.	علاءالدين الطنطاوى	2023-07-19 13:20:58	نحن سعيدين بمشاركتنا رأيك وتجربتك معنا. شكرا لك	2023-07-23 06:25:44	0	ar	us		5	ar	program serve purpose require go branch	Neutral	1	0	0
Google Play Store	f3990d39-f752-4430-827b-010ebfac0f04	Unfortunately, the application is primitive. I want to transfer to a beneficiary in the same bank where I am registered, but unfortunately, it is not available. I want to make an immediate transfer, but every time it says transfer not activated, not activated. It is a large bank, but its application is very poor. I wish they would see the other banks' applications and benefit from them, such as A…	مصطفى عيسى	2023-07-18 06:29:17	نعتذر للمشكلة التي واجهتك ونشكر لك ملاحظاتك لمساعدتك يرجى مشاركتنا تفاصيل المشكلة التي واجهتك عبر الرابط https://anb.tw/3Vpq1cv شكرا لزيارتك.	2023-07-20 04:12:51	0	ar	us		1	ar	unfortunately application primitive want transfer beneficiary bank register unfortunately available want make immediate transfer every time say transfer activate activate large bank application poor wish would see bank applications benefit al rajhi al riyadh bank easy use service available easily	Negative	1	1	0
Google Play Store	0a9a6cf2-1a97-4ab8-a292-f9afbf427964	Sorry, I cannot add a beneficiary.	Abdu Dahab	2023-07-17 14:43:40	نعتذر للمشكلة التي واجهتك ونشكر لك ملاحظاتك لمساعدتك يرجى مشاركتنا تفاصيل المشكلة التي واجهتك عبر الرابط https://anb.tw/3Vpq1cv شكرا لزيارتك.	2023-07-20 04:12:24	1	ar	us		5	ar	sorry add beneficiary	Negative	1	1	0
Google Play Store	4f7c3f81-3895-44f5-8dc7-755f039c4743	The application does not work on my device. It asks me to enable location services, and this option is already activated. However, despite that, it still does not work, and I receive this notification.	فواز الشهري	2023-07-16 22:33:04	نعتذر للمشكلة التي واجهتك ونشكر لك ملاحظاتك لمساعدتك يرجى الاتصال بنا على 8001244040 او يمكنك مراسلتنا على حسابنا في تويتر @anb_care شكرا لك.	2023-07-18 12:19:55	6	ar	us		1	ar	application work device ask enable location service option already activate however despite still work receive notification	Negative	0	1	0
Google Play Store	d2c5b487-3525-4cb3-8d82-c94dc1f71bb4	Why does it show an error when I try to register with anb mobile? It's been two weeks and you haven't provided me with a solution.	KHALED	2023-07-16 17:45:35	نعتذر للمشكلة التي واجهتك ونشكر لك ملاحظاتك لمساعدتك يرجى الاتصال بنا على 8001244040 او يمكنك مراسلتنا على حسابنا في تويتر @anb_care شكرا لك.	2023-07-18 12:20:12	0	ar	us		1	ar	show error try register anb mobile two weeks havent provide solution	Negative	0	1	0
Google Play Store	7bf88d00-98d3-4ba2-8bd2-b3fc7ab6fd5b	There is no online shopping suspension, and there is no suspension for purchasing through the Athir service for the Mada card. Also, there is a problem with sharing the remittance transaction, as the remittance file is not downloaded. Now there is a problem with the GPS location service; we activate it but it doesn't recognize the location, it remains frozen. We have to exit and re-enter the appl…	abo ahmed	2023-07-16 17:27:46	نعتذر للمشكلة التي واجهتك ونشكر لك ملاحظاتك لمساعدتك يرجى مشاركتنا تفاصيل المشكلة التي واجهتك عبر الرابط https://anb.tw/3Vpq1cv شكرا لزيارتك.	2023-07-19 04:11:43	19	ar	us		3	ar	online shop suspension suspension purchase athir service mada card also problem share remittance transaction remittance file download problem gps location service activate doesnt recognize location remain freeze exit reenter application several time recognize gps work	Neutral	0	1	1
Google Play Store	e9d86b7d-dae6-4b10-971e-d241624c41e8	The latest update is very bad, which is the location detection.	محمد الياسين	2023-07-13 12:53:38	نعتذر للمشكلة التي واجهتك ونشكر لك ملاحظاتك لمساعدتك يرجى مشاركتنا تفاصيل المشكلة التي واجهتك عبر الرابط https://anb.tw/3Vpq1cv شكرا لزيارتك.	2023-07-18 04:27:10	0	ar	us		1	ar	late update bad location detection	Negative	1	1	0
Google Play Store	3e21e068-39f1-4dff-a784-a79f431a4e03	Excellent application	Moood Al Thobina	2023-07-12 05:04:13	نحن سعيدين بمشاركتنا رأيك وتجربتك معنا. شكرا لك	2023-07-16 18:32:43	0	ar	us		5	ar	excellent application	Positive	0	0	0
Google Play Store	b567aab4-ce37-4f60-8f00-23eac3995d85	The application is excellent and I have not encountered any problems.	Fahad Alhrabi	2023-07-11 19:14:00	نحن سعيدين بمشاركتنا رأيك وتجربتك معنا. شكرا لك	2023-07-18 04:28:07	0	ar	us		4	ar	application excellent encounter problems	Positive	1	0	0
Google Play Store	55638969-d608-4efa-b10f-f27b6b9dc7f7	Excellent and flexible application.	أبو أمير	2023-07-11 17:27:20	نحن سعيدين بمشاركتنا رأيك وتجربتك معنا. شكرا لك	2023-07-16 18:32:28	0	ar	us		5	ar	excellent flexible application	Positive	1	0	0
Google Play Store	4d2c51ad-93ac-4a90-94ab-9e310880fca1	A wonderful and easy-to-use application.	ابو الجود	2023-07-11 16:58:56	نحن سعيدين بمشاركتنا رأيك وتجربتك معنا. شكرا لك	2023-07-16 18:31:51	0	ar	us		5	ar	wonderful easytouse application	Positive	0	0	0
Google Play Store	2ad1c52e-c3a9-494e-a21b-6fa9fc7766b1	Access to services has become much easier, honestly, it deserves ***** Stars	يحي حسن الأمير	2023-07-11 12:31:34	نحن سعيدين بمشاركتنا رأيك وتجربتك معنا. شكرا لك	2023-07-16 18:31:36	0	ar	us		5	ar	access service become much easy honestly deserve star	Positive	1	0	0
Google Play Store	612120cd-a6ea-4fda-8a4a-1db73ee5f8ef	The application is very beautiful.	حكيم العساكر	2023-07-11 07:39:18	نحن سعيدين بمشاركتنا رأيك وتجربتك معنا. شكرا لك	2023-07-16 18:31:19	0	ar	us		5	ar	application beautiful	Positive	0	0	0
Google Play Store	ef549534-355a-4d8b-9a5a-f502e94d645b	Excellent, but it has been closed for a few days and it is not opening. I don't know if it needs an update or something exactly, I deleted it and tried to download it again but it won't download. What is the problem?!	Rami Zahrani	2023-07-10 16:12:33	نحن سعيدين بمشاركتنا رأيك وتجربتك معنا. شكرا لك	2023-07-16 18:34:39	0	ar	us		5	ar	excellent close days open dont know need update something exactly delete try download wont download problem	Negative	0	1	0
Google Play Store	5c33278a-a81f-4bbc-bff5-c528909e009f	Balance inquiry for Saud Marzouq Al Harbi.	سعود الحربي	2023-07-10 01:31:22	نحن سعيدين بمشاركتنا رأيك وتجربتك معنا. شكرا لك	2023-07-16 18:36:56	0	ar	us		5	ar	balance inquiry saud marzouq al harbi	Neutral	0	0	0
Google Play Store	4272c983-1b4f-464b-bf10-8d64ccdfe250	Excellent and very important.	turke H ALMALKE	2023-07-09 12:11:26	نحن سعيدين بمشاركتنا رأيك وتجربتك معنا. شكرا لك	2023-07-12 01:21:28	0	ar	us		5	ar	excellent important	Positive	0	0	0
Google Play Store	2acfa5e9-e74f-4a8c-bd4f-62737d21d04e	A very good application with need for some improvements to keep up with other applications.	Ali Yahya	2023-07-09 09:15:14	شكرا لك سوف يتم اخذ ملاحظتك بعين الاعتبار ، نتطلع لرؤيتك مجددا. شكرا لزيارتك.	2023-07-12 06:23:41	0	ar	us		3	ar	good application need improvements keep applications	Positive	1	0	0
Google Play Store	ccc67ec4-37cb-49b3-a0e0-3981cf8c2474	Despite specifying the location, it asks me to specify the location again and the application does not open. Very, very bad.	zainab ali	2023-07-09 08:06:02	نعتذر للمشكلة التي واجهتك ونشكر لك ملاحظاتك لمساعدتك يرجى الاتصال بنا على 8001244040 او يمكنك مراسلتنا على حسابنا في تويتر @anb_care شكرا لك.	2023-07-12 01:28:37	0	ar	us		1	ar	despite specify location ask specify location application open bad	Negative	1	1	0
Google Play Store	7b561839-9d5d-4810-a82f-091beda89e9b	Unfortunately, the update is exhausting and not everyone has knowledge about the problematic devices. Even the verification code message arrives late for me, up to 10 days, and I have been trying without any success.	ساره المسلم	2023-07-09 03:27:25	نعتذر للمشكلة التي واجهتك ونشكر لك ملاحظاتك لمساعدتك يرجى الاتصال بنا على 8001244040 او يمكنك مراسلتنا على حسابنا في تويتر @anb_care شكرا لك.	2023-07-12 01:26:29	0	ar	us		1	ar	unfortunately update exhaust everyone knowledge problematic devices even verification code message arrive late days try without success	Negative	0	1	0
Google Play Store	1e727a04-b89f-48c7-8b09-e9cce2abf3ae	The application does not open, why???	Soso Love	2023-07-07 17:00:10	نعتذر للمشكلة التي واجهتك ونشكر لك ملاحظاتك لمساعدتك يرجى الاتصال بنا على 8001244040 او يمكنك مراسلتنا على حسابنا في تويتر @anb_care شكرا لك.	2023-07-12 01:24:16	0	ar	us		1	ar	application open	Negative	0	1	0
Google Play Store	aac6cd2a-251d-4f9c-b9e0-0b62ac1d7019	The application is bad and the update made it worse. I cannot make a transfer.	Amjad Osama	2023-07-06 19:05:31	نعتذر للمشكلة التي واجهتك ونشكر لك ملاحظاتك لمساعدتك يرجى مشاركتنا تفاصيل المشكلة التي واجهتك عبر الرابط https://anb.tw/3Vpq1cv شكرا لزيارتك.	2023-07-09 05:00:49	1	ar	us		1	ar	application bad update make bad make transfer	Negative	1	1	0
Google Play Store	73fa894c-15d1-48b8-a4f3-8b0365cd3144	The application does not open frequently.	Ahmed Mohamed	2023-07-06 15:33:06	نعتذر للمشكلة التي واجهتك ونشكر لك ملاحظاتك لمساعدتك يرجى مشاركتنا تفاصيل المشكلة التي واجهتك عبر الرابط https://anb.tw/3Vpq1cv شكرا لزيارتك.	2023-07-09 05:00:56	0	ar	us		1	ar	application open frequently	Neutral	0	1	0
Google Play Store	90264ab5-1d3b-4060-a964-ce8ceb9f0ce7	An easy-to-use application that has all the requests needed by the customer.	Faisal Aldossary	2023-07-06 13:21:52	نحن سعيدين بمشاركتنا رأيك وتجربتك معنا. شكرا لك	2023-07-09 05:01:26	2	ar	us		5	ar	easytouse application request need customer	Positive	0	0	0
Google Play Store	945d9505-bdc4-4c1a-8b3a-932b0f19e63e	A wonderful and easy-to-use application. Thank you Arab Bank.	Rital Alharthi	2023-07-05 18:35:37	نحن سعيدين بمشاركتنا رأيك وتجربتك معنا. شكرا لك	2023-07-09 04:58:18	0	ar	us		5	ar	wonderful easytouse application thank arab bank	Positive	0	0	0
Google Play Store	a940feac-cb39-40d0-a544-2e92c9b53415	Thank you from the bottom of my heart for the effort that is appreciated and remembered.	Ali Alattas	2023-07-05 12:25:45	نحن سعيدين بمشاركتنا رأيك وتجربتك معنا. شكرا لك	2023-07-09 04:57:30	0	ar	us		5	ar	thank bottom heart effort appreciate remember	Positive	0	0	0
Google Play Store	3b923c55-3dde-457e-bb7b-4bb8b020be4e	Excellent and very easy.	Mohammed AlAbdulbaaqi	2023-07-05 10:56:42	نحن سعيدين بمشاركتنا رأيك وتجربتك معنا. شكرا لك	2023-07-09 04:56:08	0	ar	us		5	ar	excellent easy	Positive	0	0	0
Google Play Store	fb4d9efd-af9e-4de0-ad46-2cb956f1ac77	Special application	دادي فينقر	2023-07-05 00:03:21	نحن سعيدين بمشاركتنا رأيك وتجربتك معنا. شكرا لك	2023-07-09 04:55:58	0	ar	us		5	ar	special application	Neutral	1	1	0
Google Play Store	6a2dc963-af2b-4354-a712-a64818c9e4da	Nice application, but we hope you add an online store to purchase different cards.	NADER O	2023-07-04 21:07:05	شكرا لك سوف يتم اخذ ملاحظتك بعين الاعتبار ، نتطلع لرؤيتك مجددا. شكرا لزيارتك.	2023-07-09 04:55:45	0	ar	us		4	ar	nice application hope add online store purchase different card	Positive	1	0	0
Google Play Store	137dd7ab-a104-422e-aeda-977612ec1a19	First, the application was good, but now it doesn't open with me, so I have deleted it more than once. Even on my second phone, it is also not opening. It says that I opened it on another phone. What is the solution? How can I transfer it?	عائشة عربي	2023-07-04 08:35:11	نعتذر للمشكلة التي واجهتك ونشكر لك ملاحظاتك لمساعدتك يرجى مشاركتنا تفاصيل المشكلة التي واجهتك عبر الرابط https://anb.tw/3Vpq1cv شكرا لزيارتك.	2023-07-09 04:54:17	0	ar	us		1	ar	first application good doesnt open delete even second phone also open say open another phone solution transfer	Negative	0	1	0
Google Play Store	113fbbbb-87e4-483f-9430-637efc20f8f0	The application is bad, I cannot add beneficiaries. I have reached the maximum number of beneficiaries and I have not added anyone.	Noor Ali	2023-07-04 02:01:41	نعتذر للمشكلة التي واجهتك ونشكر لك ملاحظاتك لمساعدتك يرجى مشاركتنا تفاصيل المشكلة التي واجهتك عبر الرابط https://anb.tw/3Vpq1cv شكرا لزيارتك.	2023-07-09 04:54:02	0	ar	us		2	ar	application bad add beneficiaries reach maximum number beneficiaries add anyone	Negative	1	1	0
Google Play Store	a4064534-6b4c-42cd-be19-820588e2863b	A terrible program beyond imagination.	Temi Salem	2023-07-03 10:45:36	نعتذر للمشكلة التي واجهتك ونشكر لك ملاحظاتك لمساعدتك يرجى مشاركتنا تفاصيل المشكلة التي واجهتك عبر الرابط https://anb.tw/3Vpq1cv شكرا لزيارتك.	2023-07-05 04:20:17	0	ar	us		1	ar	terrible program beyond imagination	Negative	1	0	0
Google Play Store	2f85326c-b9f3-4451-8e0b-4868f8f05038	My experience with the Arab Bank application is very bad. For almost two days, I have been trying to make transfers, but it is not possible. It is also not possible to pay bills. It is very embarrassing and I have to wait a long time for the issue to be fixed.	بعيد النظر	2023-07-02 10:52:18	نعتذر للمشكلة التي واجهتك ونشكر لك ملاحظاتك لمساعدتك يرجى مشاركتنا تفاصيل المشكلة التي واجهتك عبر الرابط https://anb.tw/3Vpq1cv شكرا لزيارتك.	2023-07-05 04:18:34	0	ar	us		1	ar	experience arab bank application bad almost two days try make transfer possible also possible pay bill embarrass wait long time issue fix	Negative	1	1	0
Google Play Store	71772f42-b41e-4c1e-aa21-7ae9059b8b9c	Honestly, after it was an excellent application, it seems like you want to ruin it for us. Why do you want to open location sharing? Then I allowed it when using the application, but there is no benefit. Why is it like this?	Bander mohanna	2023-07-01 18:13:30	نعتذر للمشكلة التي واجهتك ونشكر لك ملاحظاتك لمساعدتك يرجى الاتصال بنا على 8001244040 او يمكنك مراسلتنا على حسابنا في تويتر @anb_care شكرا لك.	2023-07-03 11:23:48	0	ar	us		1	ar	honestly excellent application seem like want ruin us want open location share allow use application benefit like	Negative	1	1	0
Google Play Store	3a7e22c3-18ed-4482-a329-2fc0b7adb828	The application does not open.	Mohamed shaaban	2023-06-30 20:33:50	نعتذر للمشكلة التي واجهتك ونشكر لك ملاحظاتك لمساعدتك يرجى الاتصال بنا على 8001244040 او يمكنك مراسلتنا على حسابنا في تويتر @anb_care شكرا لك.	2023-07-03 11:22:59	0	ar	us		1	ar	application open	Neutral	0	1	0
Google Play Store	a225eeee-b948-487e-ad79-4fa60d8a066c	The application is bad on the second day of Eid, and for the second consecutive day, the application does not open.	عبدالله الفهيد	2023-06-29 16:43:54	نعتذر للمشكلة التي واجهتك ونشكر لك ملاحظاتك لمساعدتك يرجى الاتصال بنا على 8001244040 او يمكنك مراسلتنا على حسابنا في تويتر @anb_care شكرا لك.	2023-07-02 10:03:59	0	ar	us		2	ar	application bad second day eid second consecutive day application open	Negative	1	1	0
Google Play Store	6fbd1b16-8534-496c-b884-85e3d89e187f	The program always asks for activating the geographic location, even though it is already activated. It is one of the worst programs I have ever used.	Noor Ibgh	2023-06-28 18:20:52	نعتذر للمشكلة التي واجهتك ونشكر لك ملاحظاتك لمساعدتك يرجى الاتصال بنا على 8001244040 او يمكنك مراسلتنا على حسابنا في تويتر @anb_care شكرا لك.	2023-07-02 10:02:38	2	ar	us		1	ar	program always ask activate geographic location even though already activate one bad program ever use	Negative	1	1	0
Google Play Store	5441aed5-1220-46c9-bdeb-9df151e151a8	The worst banking application.	احمد الزهراني	2023-06-27 18:29:12	نعتذر للمشكلة التي واجهتك ونشكر لك ملاحظاتك لمساعدتك يرجى الاتصال بنا على 8001244040 او يمكنك مراسلتنا على حسابنا في تويتر @anb_care شكرا لك.	2023-07-02 09:52:57	0	ar	us		1	ar	bad bank application	Negative	1	0	0
Google Play Store	96bcf524-0e37-4f8c-bed7-898ff955bfd2	The old application is better... In fact, this application is the worst. It caused me to lose even though it has been for a while. Verification messages do not arrive, I paid the bill but did not receive confirmation. Then, I paid from another bank and found that the bill was already paid. Go back to the old application or fix the errors like other banks.	K Alharthi	2023-06-27 14:54:56	نعتذر للمشكلة التي واجهتك ونشكر لك ملاحظاتك لمساعدتك يرجى مشاركتنا تفاصيل المشكلة التي واجهتك عبر الرابط https://anb.tw/3Vpq1cv شكرا لزيارتك.	2023-07-04 11:38:13	0	ar	us		1	ar	old application good fact application bad cause lose even though verification message arrive pay bill receive confirmation pay another bank find bill already pay go back old application fix errors like bank	Negative	1	1	0
Google Play Store	2a257fb9-e7cb-4e99-acc6-62ef884e5b9b	The new update has a problem, I cannot pay bills or transfer from my account. This is a big problem and reflects poorly on the bank's reputation.	محمد عبيدات	2023-06-27 05:52:58	نعتذر للمشكلة التي واجهتك ونشكر لك ملاحظاتك لمساعدتك يرجى الاتصال بنا على 8001244040 او يمكنك مراسلتنا على حسابنا في تويتر @anb_care شكرا لك.	2023-07-02 10:09:49	18	ar	us		1	ar	new update problem pay bill transfer account big problem reflect poorly bank reputation	Negative	1	1	0
Google Play Store	d2ce5bf3-78f7-4cb0-84cf-dba3ae029549	Anyone who has a problem should uninstall the application and reinstall it. It will fix everything, except for the issue of bill payment.	ثامر الحربي	2023-06-26 18:48:04	نجوم نحن سعيدين بمشاركتنا رأيك وتجربتك معنا. شكرا لك	2023-07-02 10:07:23	0	ar	us		5	ar	anyone problem uninstall application reinstall fix everything except issue bill payment	Neutral	0	1	0
Google Play Store	ab2a2b4b-a030-49e1-bd9e-72432f2d7119	The latest update is very bad, it is not possible to transfer or pay the bills.	MANAL SALMAN	2023-06-26 16:59:30	نعتذر للمشكلة التي واجهتك ونشكر لك ملاحظاتك لمساعدتك يرجى الاتصال بنا على 8001244040 او يمكنك مراسلتنا على حسابنا في تويتر @anb_care شكرا لك.	2023-07-02 10:06:35	0	ar	us		1	ar	late update bad possible transfer pay bill	Negative	1	1	0
Google Play Store	95525360-1090-48d5-8098-aae19e0a21ca	Very funny	MrAhmad6540	2023-06-26 11:15:27	نعتذر للمشكلة التي واجهتك ونشكر لك ملاحظاتك لمساعدتك يرجى الاتصال بنا على 8001244040 او يمكنك مراسلتنا على حسابنا في تويتر @anb_care شكرا لك.	2023-07-02 10:14:30	0	ar	us		1	ar	funny	Positive	0	0	0
Google Play Store	837f1d86-d982-459d-af20-045215b4b216	The new update is not working at all. I hope to revert to the old update.	بنت محمد	2023-06-26 10:04:43	نعتذر للمشكلة التي واجهتك ونشكر لك ملاحظاتك لمساعدتك يرجى الاتصال بنا على 8001244040 او يمكنك مراسلتنا على حسابنا في تويتر @anb_care شكرا لك.	2023-07-02 10:14:49	0	ar	us		1	ar	new update work hope revert old update	Negative	0	1	0
Google Play Store	0f1f5c07-5e87-4e38-8dc9-d00993ea8dd4	Bad application and bad bank, there is no bill payment in it, and the updates are unsuccessful.	محمد العنزي	2023-06-26 08:43:30	نعتذر للمشكلة التي واجهتك ونشكر لك ملاحظاتك لمساعدتك يرجى الاتصال بنا على 8001244040 او يمكنك مراسلتنا على حسابنا في تويتر @anb_care شكرا لك.	2023-07-02 10:15:34	0	ar	us		1	ar	bad application bad bank bill payment update unsuccessful	Negative	1	1	0
Google Play Store	c1d5856f-720f-4c23-84d6-4e8e9e3f731b	There is an error when logging in. What is the problem? Every now and then there is an issue with the application.	purble girl	2023-06-26 07:05:50	نعتذر للمشكلة التي واجهتك ونشكر لك ملاحظاتك لمساعدتك يرجى الاتصال بنا على 8001244040 او يمكنك مراسلتنا على حسابنا في تويتر @anb_care شكرا لك.	2023-07-02 10:16:37	0	ar	us		1	ar	error log problem every issue application	Negative	0	1	0
Google Play Store	92572909-d828-4325-8aac-78117b937b04	Sometimes I have a problem where I can't convert or pay bills.	ابو غريب	2023-06-26 05:45:39	شكرا لك سوف يتم اخذ ملاحظتك بعين الاعتبار ، نتطلع لرؤيتك مجددا. شكرا لزيارتك.	2023-07-02 10:19:49	0	ar	us		3	ar	sometimes problem cant convert pay bill	Negative	0	1	0
Google Play Store	9c6bfd07-8a52-45e2-ab41-538a7e334826	Honestly, we have been experiencing unfortunate service disruptions since yesterday until today. I am unable to pay bills or transfer money. Please, I beg you, is this reasonable? All the other banks have resolved their issues, while we are still suffering with you. We are exhausted.	azeez aziz	2023-06-26 05:42:40	نعتذر للمشكلة التي واجهتك ونشكر لك ملاحظاتك لمساعدتك يرجى الاتصال بنا على 8001244040 او يمكنك مراسلتنا على حسابنا في تويتر @anb_care شكرا لك.	2023-07-02 10:20:11	0	ar	us		2	ar	honestly experience unfortunate service disruptions since yesterday today unable pay bill transfer money please beg reasonable bank resolve issue still suffer exhaust	Negative	1	1	0
Google Play Store	bd8dd157-8720-4e35-a1ab-0a46ef506c2f	I want the solution to make the transfer and invoice fields appear in black color instead of blue. I can't click on them.	سليم الفضلي	2023-06-26 02:53:32	نعتذر للمشكلة التي واجهتك ونشكر لك ملاحظاتك لمساعدتك يرجى الاتصال بنا على 8001244040 او يمكنك مراسلتنا على حسابنا في تويتر @anb_care شكرا لك.	2023-07-02 10:22:03	0	ar	us		2	ar	want solution make transfer invoice field appear black color instead blue cant click	Negative	0	1	0
Google Play Store	aba7fa63-f573-452a-82a8-aece43d56e82	The application is very bad. Can I know how to transfer from my account or pay the bills?	ابو احمد الهزاع	2023-06-26 02:40:39	نعتذر للمشكلة التي واجهتك ونشكر لك ملاحظاتك لمساعدتك يرجى الاتصال بنا على 8001244040 او يمكنك مراسلتنا على حسابنا في تويتر @anb_care شكرا لك.	2023-07-02 10:21:16	0	ar	us		1	ar	application bad know transfer account pay bill	Negative	1	1	0
Google Play Store	12c15c3f-92c8-460c-ad4a-ad12929dcb30	There is a problem with the application when making transfers and paying bills, and a prompt appears on the screen to select the location. This is not acceptable, Arab Bank. Your application is confusing during the holiday season.	يحي مليحي	2023-06-26 02:28:18	نعتذر للمشكلة التي واجهتك ونشكر لك ملاحظاتك لمساعدتك يرجى الاتصال بنا على 8001244040 او يمكنك مراسلتنا على حسابنا في تويتر @anb_care شكرا لك.	2023-07-02 10:21:05	0	ar	us		1	ar	problem application make transfer pay bill prompt appear screen select location acceptable arab bank application confuse holiday season	Negative	1	1	0
Google Play Store	93cc3e02-1b36-46ad-839f-75ad69d9a177	No transfer or bill payment. It is better to close the account if the problem is not solved.	صالح الحربي	2023-06-26 01:52:36	نعتذر للمشكلة التي واجهتك ونشكر لك ملاحظاتك لمساعدتك يرجى الاتصال بنا على 8001244040 او يمكنك مراسلتنا على حسابنا في تويتر @anb_care شكرا لك.	2023-07-02 10:20:52	0	ar	us		1	ar	transfer bill payment good close account problem solve	Negative	0	1	0
Google Play Store	d4fc6e64-2057-4f09-845d-e1ddfe60fb84	The application is bad, we cannot make transfers or payments, and a system update message was sent by the bank, but so far nothing has happened. I want to know what the solution is. Thank you.	وليد خليل	2023-06-26 01:52:02	نعتذر للمشكلة التي واجهتك ونشكر لك ملاحظاتك لمساعدتك يرجى الاتصال بنا على 8001244040 او يمكنك مراسلتنا على حسابنا في تويتر @anb_care شكرا لك.	2023-07-02 10:20:37	0	ar	us		1	ar	application bad make transfer payments system update message send bank far nothing happen want know solution thank	Negative	1	1	0
Google Play Store	8b919cf2-2b59-4c98-86d8-d687799ee491	The conversion icon and bill payment are not working for me after the new update. Please resolve the issue.	L	2023-06-26 01:40:16	نعتذر للمشكلة التي واجهتك ونشكر لك ملاحظاتك لمساعدتك يرجى الاتصال بنا على 8001244040 او يمكنك مراسلتنا على حسابنا في تويتر @anb_care شكرا لك.	2023-07-02 10:27:39	0	ar	us		1	ar	conversion icon bill payment work new update please resolve issue	Negative	0	1	0
Google Play Store	e9053f15-ba66-40fe-a839-6abe4506655b	The value of the application is one star, and the reason is that it forces you to turn on the GPS every time you enter the program, which is annoying. I hope you can remove this requirement.	BAQ	2023-06-25 23:15:40	نعتذر للمشكلة التي واجهتك ونشكر لك ملاحظاتك لمساعدتك يرجى الاتصال بنا على 8001244040 او يمكنك مراسلتنا على حسابنا في تويتر @anb_care شكرا لك.	2023-07-02 10:26:10	0	ar	us		1	ar	value application one star reason force turn gps every time enter program annoy hope remove requirement	Negative	1	1	0
Google Play Store	9cca2f5e-6c10-4053-a9ab-daa458a4d90f	nice	آنين الصمت	2023-06-25 22:08:13	نجوم نحن سعيدين بمشاركتنا رأيك وتجربتك معنا. شكرا لك	2023-07-02 10:25:46	0	ar	us		5	ar	nice	Positive	0	0	0
Google Play Store	9519aed9-2495-47de-a932-90a1d702f855	Very bad application that is completely incompatible with the size and capabilities of the bank.	مدحت الحاوي	2023-06-25 21:44:13	نعتذر للمشكلة التي واجهتك ونشكر لك ملاحظاتك لمساعدتك يرجى الاتصال بنا على 8001244040 او يمكنك مراسلتنا على حسابنا في تويتر @anb_care شكرا لك.	2023-07-02 10:25:29	1	ar	us		1	ar	bad application completely incompatible size capabilities bank	Negative	1	1	0
Google Play Store	4e35c06c-57eb-45b5-b803-53732d49858a	By God, geolocation is very poor and it is of no use, neither for charging nor for anything.	Ahmed ALNGEE	2023-06-25 21:33:24	نعتذر للمشكلة التي واجهتك ونشكر لك ملاحظاتك لمساعدتك يرجى الاتصال بنا على 8001244040 او يمكنك مراسلتنا على حسابنا في تويتر @anb_care شكرا لك.	2023-07-02 10:25:19	0	ar	us		1	ar	god geolocation poor use neither charge anything	Negative	1	0	0
Google Play Store	d3ae5d15-93c3-4bb3-8c14-8b27b1e449ac	The application is unsatisfactory. Is there a better application than this one?	ابو ريان	2023-06-25 20:53:57	نعتذر للمشكلة التي واجهتك ونشكر لك ملاحظاتك لمساعدتك يرجى الاتصال بنا على 8001244040 او يمكنك مراسلتنا على حسابنا في تويتر @anb_care شكرا لك.	2023-07-02 10:24:31	0	ar	us		2	ar	application unsatisfactory good application one	Negative	1	0	0
Google Play Store	d5ff1b89-f695-4246-a4ae-58cf5c3e36e9	Your application is the worst, even the transfers are not working and the bill payment is also blocked.	Aisha1415 Mobarki	2023-06-25 20:50:50	نعتذر للمشكلة التي واجهتك ونشكر لك ملاحظاتك لمساعدتك يرجى الاتصال بنا على 8001244040 او يمكنك مراسلتنا على حسابنا في تويتر @anb_care شكرا لك.	2023-07-02 10:33:51	0	ar	us		1	ar	application bad even transfer work bill payment also block	Negative	1	1	0
Google Play Store	33dff6e6-c620-4800-a347-1cb0e49c1073	I have been trying for two hours to convert or pay my bills and it keeps asking me for an update, even though there is no update available for the app on Google Play.	Nasser Al_Qahtani	2023-06-25 20:45:07	شكرا لك سوف يتم اخذ ملاحظتك بعين الاعتبار ، نتطلع لرؤيتك مجددا. شكرا لزيارتك.	2023-07-02 10:33:18	0	ar	us		3	ar	try two hours convert pay bill keep ask update even though update available app google play	Negative	0	1	0
Google Play Store	1a8a7415-419a-4cf4-b1d7-ac079e3c4bcd	A very unsuccessful application and not even worth one star.	Sami Alomran	2023-06-25 20:13:11	نعتذر للمشكلة التي واجهتك ونشكر لك ملاحظاتك لمساعدتك يرجى الاتصال بنا على 8001244040 او يمكنك مراسلتنا على حسابنا في تويتر @anb_care شكرا لك.	2023-07-02 10:32:22	0	ar	us		1	ar	unsuccessful application even worth one star	Negative	1	0	0
Google Play Store	e9084e35-949c-407a-bb9d-30b6c4d22a80	Abu Rayal application has very bad continuous crashing, and I urge everyone to transfer their accounts to any other available bank.	تبوك الورد	2023-06-25 20:05:58	نعتذر للمشكلة التي واجهتك ونشكر لك ملاحظاتك لمساعدتك يرجى الاتصال بنا على 8001244040 او يمكنك مراسلتنا على حسابنا في تويتر @anb_care شكرا لك.	2023-07-02 10:32:49	0	ar	us		1	ar	abu rayal application bad continuous crash urge everyone transfer account available bank	Negative	1	1	1
Google Play Store	8fa37ae8-b4fb-4485-9361-3b13737cc071	The program freezes when the payment time and the transfer time coincide. I hope it can be fixed.	عبد العزيز الحمد	2023-06-25 19:29:28	نعتذر للمشكلة التي واجهتك ونشكر لك ملاحظاتك لمساعدتك يرجى الاتصال بنا على 8001244040 او يمكنك مراسلتنا على حسابنا في تويتر @anb_care شكرا لك.	2023-07-02 10:32:07	0	ar	us		1	ar	program freeze payment time transfer time coincide hope fix	Negative	0	1	1
Google Play Store	27691297-f88c-40f2-9479-851175506801	Remittance commentator and bill payment.	المخلفي الحربي	2023-06-25 19:27:28	نعتذر للمشكلة التي واجهتك ونشكر لك ملاحظاتك لمساعدتك يرجى الاتصال بنا على 8001244040 او يمكنك مراسلتنا على حسابنا في تويتر @anb_care شكرا لك.	2023-07-02 10:31:58	0	ar	us		1	ar	remittance commentator bill payment	Neutral	0	1	0
Google Play Store	f10dc428-a159-4409-8108-f9437ec86e36	You have proven that even the application is the worst so far. I've been trying to log in, but the application won't open, and it hasn't opened for an hour. This means that both the bank and the application are failures.	MARWAN TH	2023-06-25 19:18:13	نعتذر للمشكلة التي واجهتك ونشكر لك ملاحظاتك لمساعدتك يرجى الاتصال بنا على 8001244040 او يمكنك مراسلتنا على حسابنا في تويتر @anb_care شكرا لك.	2023-07-02 10:31:35	0	ar	us		1	ar	prove even application bad far ive try log application wont open hasnt open hour mean bank application failures	Negative	1	1	0
Google Play Store	9844d660-6ecd-4ab3-a529-bbc3b9537c7d	There is a malfunction in the application.	فيصل الدوسي	2023-06-25 18:56:23	نعتذر للمشكلة التي واجهتك ونشكر لك ملاحظاتك لمساعدتك يرجى مشاركتنا تفاصيل المشكلة التي واجهتك عبر الرابط https://anb.tw/3Vpq1cv شكرا لزيارتك.	2023-07-04 11:58:37	0	ar	us		1	ar	malfunction application	Negative	0	1	0
Google Play Store	5427e191-c15a-47ed-a8c6-68d113b61ffb	Peace be upon you and the mercy of Allah. My friends, whoever is heading north, I will give them my Eid gift. My children have been waiting for the bank since yesterday, and they are exhausted. I am unable to transfer or check the account or bills. May Allah protect us from any problems and may the banks in Lebanon not go bankrupt.	Fahad Alfahad	2023-06-25 18:51:01	نعتذر للمشكلة التي واجهتك ونشكر لك ملاحظاتك لمساعدتك يرجى مشاركتنا تفاصيل المشكلة التي واجهتك عبر الرابط https://anb.tw/3Vpq1cv شكرا لزيارتك.	2023-07-04 11:58:52	0	ar	us		1	ar	peace upon mercy allah friends whoever head north give eid gift children wait bank since yesterday exhaust unable transfer check account bill may allah protect us problems may bank lebanon go bankrupt	Positive	1	1	0
Google Play Store	a4a60438-e859-4026-a63f-eb35e07b1c9c	The application is not working for me and it suddenly stopped.	رماد انسان	2023-06-25 18:39:51	نعتذر للمشكلة التي واجهتك ونشكر لك ملاحظاتك لمساعدتك يرجى مشاركتنا تفاصيل المشكلة التي واجهتك عبر الرابط https://anb.tw/3Vpq1cv شكرا لزيارتك.	2023-07-04 11:59:40	0	ar	us		1	ar	application work suddenly stop	Negative	0	1	0
Google Play Store	a085832d-7658-435e-b6f8-5ca645200367	What is this application? It's so slow to the point that I can't even switch properly. Fix your app without unnecessary additions 😡😡	S Al	2023-06-25 18:28:42	نعتذر للمشكلة التي واجهتك ونشكر لك ملاحظاتك لمساعدتك يرجى مشاركتنا تفاصيل المشكلة التي واجهتك عبر الرابط https://anb.tw/3Vpq1cv شكرا لزيارتك.	2023-07-04 12:00:06	0	ar	us		2	ar	application slow point cant even switch properly fix app without unnecessary additions	Negative	0	1	1
Google Play Store	8448972d-1a2a-4848-bf7a-639c121e3a4b	Very easy and distinctive compared to other banking applications.	Mohammad Nasser	2023-06-25 18:04:10	نحن سعيدين بمشاركتنا رأيك وتجربتك معنا. شكرا لك	2023-07-04 12:00:47	0	ar	us		5	ar	easy distinctive compare bank applications	Positive	0	0	0
Google Play Store	e557abef-9f92-49ec-8673-b501bf50fb18	Continuous criticism and unintelligent services, all of them are stupid.	fa yz	2023-06-25 17:39:44	نعتذر للمشكلة التي واجهتك ونشكر لك ملاحظاتك لمساعدتك يرجى الاتصال بنا على 8001244040 او يمكنك مراسلتنا على حسابنا في تويتر @anb_care شكرا لك.	2023-07-02 10:42:37	0	ar	us		1	ar	continuous criticism unintelligent service stupid	Negative	1	0	0
Google Play Store	ed0b939f-d939-4cf9-a342-cfbe3a0ddeeb	Lack of trust is not present in the bank itself.	ابو خالد	2023-06-25 17:27:47	نعتذر للمشكلة التي واجهتك ونشكر لك ملاحظاتك لمساعدتك يرجى مشاركتنا تفاصيل المشكلة التي واجهتك عبر الرابط https://anb.tw/3Vpq1cv شكرا لزيارتك.	2023-07-04 12:01:47	0	ar	us		1	ar	lack trust present bank	Neutral	1	0	0
Google Play Store	fb95db16-cbcb-4eb6-8a14-ecc1093586ed	the worst application that cannot be compared to other banking applications.	mms mms2	2023-06-25 17:25:35	نعتذر للمشكلة التي واجهتك ونشكر لك ملاحظاتك لمساعدتك يرجى الاتصال بنا على 8001244040 او يمكنك مراسلتنا على حسابنا في تويتر @anb_care شكرا لك.	2023-07-02 10:39:13	0	ar	us		1	ar	bad application compare bank applications	Negative	1	0	0
Google Play Store	0ed9590d-b333-4a96-b729-5221db70944a	Very bad bank, worst update ever. You can't make transfers or pay bills.	Ma Ah	2023-06-25 17:09:42	نعتذر للمشكلة التي واجهتك ونشكر لك ملاحظاتك لمساعدتك يرجى مشاركتنا تفاصيل المشكلة التي واجهتك عبر الرابط https://anb.tw/3Vpq1cv شكرا لزيارتك.	2023-07-04 12:01:57	0	ar	us		1	ar	bad bank bad update ever cant make transfer pay bill	Negative	1	1	0
Google Play Store	27270cb7-9479-4131-8cb1-19c80f66097d	the worst application, it freezes a lot, I am very frustrated with it and even when I called customer service, there was no response. In addition, the transfers icon in the application does not work.	ام مييجوو	2023-06-25 17:05:24	نعتذر للمشكلة التي واجهتك ونشكر لك ملاحظاتك لمساعدتك يرجى الاتصال بنا على 8001244040 او يمكنك مراسلتنا على حسابنا في تويتر @anb_care شكرا لك.	2023-07-02 10:37:39	0	ar	us		1	ar	bad application freeze lot frustrate even call customer service response addition transfer icon application work	Negative	1	0	1
Google Play Store	dbcdc2c3-35b5-4fb7-bbf1-e146aec2cd90	The application has stopped converting and adding bills, in addition to mobile recharge service not being available for less than 100. Also, the location identification message that appears and takes me out of the system. Please understand the problem, why did the conversion and bill payment stop?	اكاليل الورد	2023-06-25 16:42:05	نعتذر للمشكلة التي واجهتك ونشكر لك ملاحظاتك لمساعدتك يرجى الاتصال بنا على 8001244040 او يمكنك مراسلتنا على حسابنا في تويتر @anb_care شكرا لك.	2023-07-02 10:37:12	0	ar	us		1	ar	application stop convert add bill addition mobile recharge service available less also location identification message appear take system please understand problem conversion bill payment stop	Negative	0	1	0
Google Play Store	dece469b-2775-4d71-bb91-bb142b58d59a	The quick login is not working, what is the solution???????????	محمد رياني	2023-06-25 14:50:45	نحن سعيدين بمشاركتنا رأيك وتجربتك معنا. شكرا لك	2023-07-02 10:45:35	0	ar	us		5	ar	quick login work solution	Negative	0	1	0
Google Play Store	a7589c16-a98b-4808-9717-3c0dbe5282a1	Many problems occur when opening the application and also there is difficulty in transferring funds. It is very possible to switch to a better bank.	Saeed Alzhrani	2023-06-25 14:25:57	شكرا لك سوف يتم اخذ ملاحظتك بعين الاعتبار ، نتطلع لرؤيتك مجددا. شكرا لزيارتك.	2023-07-02 10:45:58	0	ar	us		3	ar	many problems occur open application also difficulty transfer fund possible switch good bank	Negative	1	1	0
Google Play Store	09c2d3dc-f5c2-4d10-8d4b-30bc55bc6bdd	The application is very bad. It needs updates until it gets fixed. First, the comments it receives are not normal. And when I try to convert, it refuses. Also, there are some employees at the branch who behave badly when I approach them. I hope you find a solution to this.	kj jk	2023-06-25 14:07:57	نعتذر للمشكلة التي واجهتك ونشكر لك ملاحظاتك لمساعدتك يرجى الاتصال بنا على 8001244040 او يمكنك مراسلتنا على حسابنا في تويتر @anb_care شكرا لك.	2023-07-02 10:50:38	0	ar	us		1	ar	application bad need update get fix first comment receive normal try convert refuse also employees branch behave badly approach hope find solution	Negative	1	1	0
Google Play Store	fa16c777-1fd3-4113-bfcf-7bf6f2ea96a2	May Allah curse the day I came to your failed bank, and your useless application, just like the one who made it. It hasn't been opening since yesterday.	عبدالرحمن الظفيري	2023-06-25 14:05:47	نعتذر للمشكلة التي واجهتك ونشكر لك ملاحظاتك لمساعدتك يرجى الاتصال بنا على 8001244040 او يمكنك مراسلتنا على حسابنا في تويتر @anb_care شكرا لك.	2023-07-02 10:55:29	0	ar	us		1	ar	may allah curse day come fail bank useless application like one make hasnt open since yesterday	Negative	1	1	0
Google Play Store	246448f2-b80c-4231-8a9d-06edb381bfab	The bank used to be prestigious. Their mobile app service was always the worst. I can't count the number of updates now, and while I'm writing this, the system has been down for over two hours, and customer complaints are keeping me busy.	ابوعبدالله ahabady1	2023-06-25 14:03:05	نعتذر للمشكلة التي واجهتك ونشكر لك ملاحظاتك لمساعدتك يرجى الاتصال بنا على 8001244040 او يمكنك مراسلتنا على حسابنا في تويتر @anb_care شكرا لك.	2023-07-02 10:50:05	0	ar	us		1	ar	bank use prestigious mobile app service always bad cant count number update im write system two hours customer complaints keep busy	Negative	1	1	0
Google Play Store	46dfeb76-a5dc-4f1d-bffd-8389081ec151	Bad application and worse bank .. It does not seek the customer's needs ... nor the age differences ... nor completing the work smoothly ... (This time will pass)	ام فهد	2023-06-25 13:33:41	نعتذر للمشكلة التي واجهتك ونشكر لك ملاحظاتك لمساعدتك يرجى الاتصال بنا على 8001244040 او يمكنك مراسلتنا على حسابنا في تويتر @anb_care شكرا لك.	2023-07-02 10:56:02	0	ar	us		1	ar	bad application bad bank seek customers need age differences complete work smoothly time pass	Negative	1	1	0
Google Play Store	b56d6833-b22c-4625-9f51-3140e66e2faf	Always complaining, especially when it comes to salaries.	احمد الشمري	2023-06-25 13:20:49	نعتذر للمشكلة التي واجهتك ونشكر لك ملاحظاتك لمساعدتك يرجى الاتصال بنا على 8001244040 او يمكنك مراسلتنا على حسابنا في تويتر @anb_care شكرا لك.	2023-07-02 10:49:55	0	ar	us		1	ar	always complain especially come salaries	Negative	1	0	0
Google Play Store	4ec32517-e46c-425b-90fd-d6a048bbd0d6	The application has become terrible, to be honest.	رمضان حنتول	2023-06-25 13:16:04	نعتذر للمشكلة التي واجهتك ونشكر لك ملاحظاتك لمساعدتك يرجى الاتصال بنا على 8001244040 او يمكنك مراسلتنا على حسابنا في تويتر @anb_care شكرا لك.	2023-07-02 10:58:51	0	ar	us		1	ar	application become terrible honest	Negative	1	0	0
Google Play Store	152260ee-6638-4348-b42b-1862415711bd	Honestly, the application is not appropriate. It has a problem; it freezes and does not open easily. The system is not valid. If one needs to open the application, they spend hours trying to open it. I request that it be fixed or deleted, and I also want to change my account from Arabic and cancel it permanently.	متعب الشلاحي	2023-06-25 12:49:47	نعتذر للمشكلة التي واجهتك ونشكر لك ملاحظاتك لمساعدتك يرجى الاتصال بنا على 8001244040 او يمكنك مراسلتنا على حسابنا في تويتر @anb_care شكرا لك.	2023-07-02 11:00:30	3	ar	us		1	ar	honestly application appropriate problem freeze open easily system valid one need open application spend hours try open request fix delete also want change account arabic cancel permanently	Negative	0	1	1
Google Play Store	059b234e-2810-4688-ba07-235e8739c32b	The application is easy.	عبدالرحمن الجهني	2023-06-25 12:45:51	نحن سعيدين بمشاركتنا رأيك وتجربتك معنا. شكرا لك	2023-07-02 10:58:31	0	ar	us		5	ar	application easy	Positive	0	0	0
Google Play Store	dd1b9c1d-de02-4c62-b4bb-3d7484211c34	"Frustrating application, always freezing."	ksa g	2023-06-25 12:42:42	نعتذر للمشكلة التي واجهتك ونشكر لك ملاحظاتك لمساعدتك يرجى الاتصال بنا على 8001244040 او يمكنك مراسلتنا على حسابنا في تويتر @anb_care شكرا لك.	2023-07-02 10:57:50	0	ar	us		1	ar	frustrate application always freeze	Negative	1	0	1
Google Play Store	8f3c5bc8-dd6e-46c1-895e-4cc96cde13ad	In addition to the constant delays and continuous frustration, I am tired of searching for a feature or even a small thing from Al Rajhi Bank's services and features in your application. Unfortunately, all my attempts have been unsuccessful. It is a complete disappointment, but what can I say? You only have your crooked nose. (Note: This translation contains slang language.)	zooom	2023-06-25 12:36:58	نعتذر للمشكلة التي واجهتك ونشكر لك ملاحظاتك لمساعدتك يرجى الاتصال بنا على 8001244040 او يمكنك مراسلتنا على حسابنا في تويتر @anb_care شكرا لك.	2023-07-02 10:57:09	0	ar	us		1	ar	addition constant delay continuous frustration tire search feature even small thing al rajhi bank service feature application unfortunately attempt unsuccessful complete disappointment say crook nose note translation contain slang language	Negative	1	0	1
Google Play Store	288fc9e0-8de5-444c-b203-0e1894c33ab0	The update is not useful for the application.	Essa Hazazi	2023-06-25 12:15:54	شكرا لك سوف يتم اخذ ملاحظتك بعين الاعتبار ، نتطلع لرؤيتك مجددا. شكرا لزيارتك.	2023-07-02 10:56:53	0	ar	us		4	ar	update useful application	Negative	0	0	0
Google Play Store	ef15cf06-1146-41a1-91f8-ba08997429b3	He lacks a lot and is always stuck.	faiz M	2023-06-25 12:04:17	شكرا لك سوف يتم اخذ ملاحظتك بعين الاعتبار ، نتطلع لرؤيتك مجددا. شكرا لزيارتك.	2023-07-02 10:56:35	0	ar	us		3	ar	lack lot always stick	Negative	0	0	1
Google Play Store	df3d6fd6-e0ec-48b8-9f33-ed28276cfbc3	Very bad, it hasn't been working for more than a week and I can't use it.	madiha m	2023-06-25 12:00:18	نعتذر للمشكلة التي واجهتك ونشكر لك ملاحظاتك لمساعدتك يرجى الاتصال بنا على 8001244040 او يمكنك مراسلتنا على حسابنا في تويتر @anb_care شكرا لك.	2023-07-02 11:07:05	0	ar	us		1	ar	bad hasnt work week cant use	Negative	1	1	0
Google Play Store	ffb0c561-8e48-4d3a-9d75-d8fe97af997d	The application is very bad today. I tried to log in, but it says the device is not registered even though I have registered the device and there is no problem with it. After registration, it says it cannot be used until after 48 hours. I received a call from the bank and they took the long card number and the PIN code, which made me suspect that the bank has been hacked. Why do you ask for all t…	محمد التميمي	2023-06-25 10:27:21	نعتذر للمشكلة التي واجهتك ونشكر لك ملاحظاتك لمساعدتك يرجى الاتصال بنا على 8001244040 او يمكنك مراسلتنا على حسابنا في تويتر @anb_care شكرا لك.	2023-07-02 11:07:52	0	ar	us		1	ar	application bad today try log say device register even though register device problem registration say use hours receive call bank take long card number pin code make suspect bank hack ask information look successful bank al rajhi bank application best application	Negative	1	1	0
Google Play Store	970bae22-da6c-426a-8710-efa4e40193a1	Your application is the worst, it does not work for bill payments and the problem has repeated more than once. You have no follow-up at all, the customer has to tell you to do an update. Unfortunately, you're the worstbank, I do not recommend anyone to open accounts with you.	A 84	2023-06-25 10:17:38	نعتذر للمشكلة التي واجهتك ونشكر لك ملاحظاتك لمساعدتك يرجى الاتصال بنا على 8001244040 او يمكنك مراسلتنا على حسابنا في تويتر @anb_care شكرا لك.	2023-07-02 11:08:04	0	ar	us		1	ar	application bad work bill payments problem repeat followup customer tell update unfortunately youre worstbank recommend anyone open account	Negative	1	1	0
Google Play Store	7d515564-5b8d-4df2-ab83-279a29464f2b	The bills cannot be paid through the application as usual. Every month, we wait for days until it is resolved, God willing, with the help of the failed bank.	احمد علي	2023-06-25 06:32:39	نعتذر للمشكلة التي واجهتك ونشكر لك ملاحظاتك لمساعدتك يرجى مشاركتنا تفاصيل المشكلة التي واجهتك عبر الرابط https://anb.tw/3Vpq1cv شكرا لزيارتك.	2023-07-04 12:11:33	0	ar	us		1	ar	bill pay application usual every month wait days resolve god will help fail bank	Negative	0	1	1
Google Play Store	0e7688ac-2645-476f-a481-5e61b2de4728	Please find a solution for the issue with your application. It is not opening and keeps asking for location permission, even though the location service is enabled. Please find a solution quickly, otherwise I will transfer my salary and all my balances to another bank. You are causing me inconvenience.	سعد مباركي	2023-06-25 03:58:36	نعتذر للمشكلة التي واجهتك ونشكر لك ملاحظاتك لمساعدتك يرجى الاتصال بنا على 8001244040 او يمكنك مراسلتنا على حسابنا في تويتر @anb_care شكرا لك.	2023-07-02 11:04:07	0	ar	us		1	ar	please find solution issue application open keep ask location permission even though location service enable please find solution quickly otherwise transfer salary balance another bank cause inconvenience	Negative	0	1	0
Google Play Store	7159990e-9af4-4ae7-b965-7a61291354c7	Bad	الهلالي محمد	2023-06-24 19:31:03	نعتذر للمشكلة التي واجهتك ونشكر لك ملاحظاتك لمساعدتك يرجى الاتصال بنا على 8001244040 او يمكنك مراسلتنا على حسابنا في تويتر @anb_care شكرا لك.	2023-07-02 11:03:24	0	ar	us		1	ar	bad	Neutral	1	0	0
Google Play Store	c48389a8-31a2-4918-9bb8-847b09cc665d	Outstanding	عيدEid حمودHomod	2023-06-23 18:23:15	نحن سعيدين بمشاركتنا رأيك وتجربتك معنا. شكرا لك	2023-07-02 11:14:16	0	ar	us		5	ar	outstanding	Positive	0	0	0
Google Play Store	c49a9bc7-c822-4606-9176-0b88d0607197	This bank is garbage	تصميم . Albearins	2023-06-23 06:00:06	نعتذر للمشكلة التي واجهتك ونشكر لك ملاحظاتك لمساعدتك يرجى الاتصال بنا على 8001244040 او يمكنك مراسلتنا على حسابنا في تويتر @anb_care شكرا لك.	2023-07-02 11:13:09	0	ar	us		1	ar	bank garbage	Negative	1	0	0
Google Play Store	bd82ecad-1277-4d63-a124-a9985dff5d5b	Very beautiful and distinctive design 55407.	Abo Faisal	2023-06-23 01:40:44	نحن سعيدين بمشاركتنا رأيك وتجربتك معنا. شكرا لك	2023-07-02 11:12:49	0	ar	us		5	ar	beautiful distinctive design	Positive	0	0	0
Google Play Store	60fa3dbc-0942-4f34-a5ff-bca43a2e76da	Very expensive, my dear, and very excellent.	ابو حلا	2023-06-22 22:46:53	نحن سعيدين بمشاركتنا رأيك وتجربتك معنا. شكرا لك	2023-07-02 11:12:11	0	ar	us		5	ar	expensive dear excellent	Positive	1	0	0
Google Play Store	6c8c86b3-c57b-4ae9-b2eb-f5753415390e	Excellent, it is excellent and easy to deal with, with high security quality. 7595.	Hamdi Saeed	2023-06-22 13:11:37	نحن سعيدين بمشاركتنا رأيك وتجربتك معنا. شكرا لك	2023-07-02 11:21:27	0	ar	us		5	ar	excellent excellent easy deal high security quality	Positive	0	0	0
Google Play Store	fc7306bc-fac2-4b8b-b341-5a08ecc39fc8	A very beautiful application, very easy to use, comprehensive in services, and beautiful in design. Yours sincerely, Abd al-Hadi Al-Murshid 18524.	asd qaz	2023-06-22 11:22:06	نحن سعيدين بمشاركتنا رأيك وتجربتك معنا. شكرا لك	2023-07-02 11:19:20	0	ar	us		5	ar	beautiful application easy use comprehensive service beautiful design sincerely abd alhadi almurshid	Positive	0	0	0
Google Play Store	9e8d45dc-06fd-465f-8b30-ed37a7b947ff	After the update, a password request appears. I enter a password, but it says there is an error and then closes the application. No branches are working properly, and no successful application. May Allah help you all.	saeed al-harbi	2023-06-22 08:34:49	نعتذر للمشكلة التي واجهتك ونشكر لك ملاحظاتك لمساعدتك يرجى الاتصال بنا على 8001244040 او يمكنك مراسلتنا على حسابنا في تويتر @anb_care شكرا لك.	2023-07-02 11:25:46	1	ar	us		1	ar	update password request appear enter password say error close application branch work properly successful application may allah help	Negative	0	1	0
Google Play Store	b88a5adf-d968-4c51-b8e0-fcac08c75314	From today, Alawwal Bank is my preferred choice. I received the card by express mail, and the activation procedures were done electronically while I am at home under the air conditioning.	اسير الليل	2023-06-21 18:17:38	نحن سعيدين بمشاركتنا رأيك وتجربتك معنا. شكرا لك	2023-07-02 11:26:11	0	ar	us		5	ar	today alawwal bank prefer choice receive card express mail activation procedures do electronically home air condition	Neutral	1	1	0
Google Play Store	3c355f52-6aed-414a-b4c7-7f67be93d01b	Weak services, primitive program, available at Al Rajhi or Alinma bank.	khaled higazi	2023-06-21 18:10:57	شكرا لك سوف يتم اخذ ملاحظتك بعين الاعتبار ، نتطلع لرؤيتك مجددا. شكرا لزيارتك.	2023-07-02 11:25:14	0	ar	us		3	ar	weak service primitive program available al rajhi alinma bank	Negative	1	0	0
Google Play Store	2cacf481-b24b-40a1-b03b-38b390be4f82	The application doesn't open for me, it says to open the website and I have opened it.	سوسو _ soso	2023-06-21 16:51:24	شكرا لك سوف يتم اخذ ملاحظتك بعين الاعتبار ، نتطلع لرؤيتك مجددا. شكرا لزيارتك.	2023-07-02 11:24:50	0	ar	us		4	ar	application doesnt open say open website open	Negative	0	1	0
Google Play Store	992b4546-0199-4df2-99bc-afb3e1f99db8	There seems to be a typing error or a misspelling in the provided Arabic text. Could you please provide the correct text so I can translate it for you?	احمد حامد	2023-06-21 12:44:20	نحن سعيدين بمشاركتنا رأيك وتجربتك معنا. شكرا لك	2023-07-02 11:24:18	0	ar	us		5	ar	seem type error misspell provide arabic text could please provide correct text translate	Negative	0	1	0
Google Play Store	ec836d64-2b84-4134-ba33-4a9cb901bd05	the worstbank and a terrible application that tells you that you cannot do it. It adds beneficiaries and tells you that you have exceeded the daily limit for adding beneficiaries. This bank is worthless. Then you go to the branch at Aziz Mall in Jeddah, and you find employees with psychological issues who don't know how to deal with people. They raise their voices from behind the glass, and their…	MaRWaN	2023-06-21 08:56:52	نعتذر للمشكلة التي واجهتك ونشكر لك ملاحظاتك لمساعدتك يرجى الاتصال بنا على 8001244040 او يمكنك مراسلتنا على حسابنا في تويتر @anb_care شكرا لك.	2023-07-02 11:23:26	0	ar	us		1	ar	worstbank terrible application tell add beneficiaries tell exceed daily limit add beneficiaries bank worthless go branch aziz mall jeddah find employees psychological issue dont know deal people raise voice behind glass colleagues understand situation dont help stare youve commit crime look evidence instead understand situation help bank disgrace	Negative	1	0	0
Google Play Store	3469d16d-d891-47f7-8a8f-8a80c056949e	Now the mobile phone is extremely overloaded, there is no space and the banking application and others need an update, meaning that one is forced to delete files and applications in order to be able to update it. Why can't the update be optional instead of being compulsory now?	Monem Kms	2023-06-20 01:27:23	شكرا لك سوف يتم اخذ ملاحظتك بعين الاعتبار ، نتطلع لرؤيتك مجددا. شكرا لزيارتك.	2023-07-02 11:22:43	0	ar	us		3	ar	mobile phone extremely overload space bank application others need update mean one force delete file applications order able update cant update optional instead compulsory	Negative	0	1	1
Google Play Store	992390bb-d4ee-4b7b-a90e-fda24f46df82	The bank is bad and the application is very, very bad. In every update, there are problems that arise, the latest being that you cannot transfer from your account at all and you cannot pay your bills except the problem of determining the location that appears and takes you out of the application. There is no support to solve the problem. May God be an advocate against you.	AbuFooz Ahmed	2023-06-19 16:05:43	نعتذر للمشكلة التي واجهتك ونشكر لك ملاحظاتك لمساعدتك يرجى الاتصال بنا على 8001244040 او يمكنك مراسلتنا على حسابنا في تويتر @anb_care شكرا لك	2023-07-02 11:27:35	135	ar	us		1	ar	bank bad application bad every update problems arise late transfer account pay bill except problem determine location appear take application support solve problem may god advocate	Negative	1	1	0
Google Play Store	e6af6dc1-913c-407d-b3f5-28935748f6f3	The application requests to open the location but it does not open.	Musa Hazazi	2023-06-19 14:42:12	نعتذر للمشكلة التي واجهتك ونشكر لك ملاحظاتك لمساعدتك يرجى الاتصال بنا على 8001244040 او يمكنك مراسلتنا على حسابنا في تويتر @anb_care شكرا لك	2023-07-02 11:27:53	0	ar	us		1	ar	application request open location open	Negative	0	1	0
Google Play Store	aa652409-fa39-4490-9e7d-e12f9c4b9095	Flexibility and ease in delivering services, in addition to high privacy.	Musk Alhorof	2023-06-19 10:55:17	نحن سعيدين بمشاركتنا رأيك وتجربتك معنا. شكرا لك	2023-07-02 11:28:33	0	ar	us		5	ar	flexibility ease deliver service addition high privacy	Positive	1	0	0
Google Play Store	904bfe70-a5a0-46f8-adc4-93c8587163ef	Hey, they should bring back the website, it was better than this terrible application. Every time I open it, it asks for website activation, even though it is already activated. I don't know why they insist on using the application when the website is easier and more convenient. But now, every time it makes you go through a thousand verifications. I swear, I'm thinking about closing my account wi…	Qwer Tyuio	2023-06-19 08:57:09	نعتذر للمشكلة التي واجهتك ونشكر لك ملاحظاتك لمساعدتك يرجى الاتصال بنا على 8001244040 او يمكنك مراسلتنا على حسابنا في تويتر @anb_care شكرا لك.	2023-07-02 11:29:04	1	ar	us		1	ar	hey bring back website good terrible application every time open ask website activation even though already activate dont know insist use application website easy convenient every time make go thousand verifications swear im think close account cant use easily	Negative	1	1	0
Google Play Store	fe78c90c-a9ff-4964-b858-c656bb8c1f8c	I understand the continuous updates, but ❗️what I don't understand are the permissions for the new application. Activating the location and if you don't do it, you can't access the application, even if you shake your head and close it afterward. And now, there's a new permission to allow the application to control and manage calls. Sorry, I don't want to bring my phone at all and leave it with yo…	عبدالله العتيبي	2023-06-19 02:10:37	نعتذر للمشكلة التي واجهتك ونشكر لك ملاحظاتك لمساعدتك يرجى الاتصال بنا على 8001244040 او يمكنك مراسلتنا على حسابنا في تويتر @anb_care شكرا لك.	2023-07-02 11:30:34	2	ar	us		1	ar	understand continuous update dont understand permissions new application activate location dont cant access application even shake head close afterward theres new permission allow application control manage call sorry dont want bring phone leave unfortunately feel like youre shout empty bottle one understand response people question inquiries like youre make difficult elderly customers instead ma…	Negative	1	1	0
Google Play Store	56c2508c-b73c-48be-96d7-a9d0592cc488	Excellent and very very fast services.	مصطفي الامين	2023-06-18 20:33:50	نحن سعيدين بمشاركتنا رأيك وتجربتك معنا. شكرا لك	2023-07-02 11:30:56	0	ar	us		5	ar	excellent fast service	Positive	0	0	0
Google Play Store	ee577f5d-01bf-485b-a886-4290cbbcd398	Bank... retro... entering the branch feels like being in the Middle Ages... their service is terrible, it would be better if there was something worse.	b3ed Anhom	2023-06-18 13:10:39	نعتذر للمشكلة التي واجهتك ونشكر لك ملاحظاتك لمساعدتك يرجى مشاركتنا تفاصيل المشكلة التي واجهتك عبر الرابط https://anb.tw/3Vpq1cv شكرا لزيارتك.	2023-06-20 07:10:33	1	ar	us		1	ar	bank retro enter branch feel like middle age service terrible would good something bad	Negative	1	0	0
Google Play Store	9ee2d161-8836-42c9-b7ae-f8bc8682eaa9	Praise be to Allah, there was a problem after the update that the application does not open now. Praise be to Allah, everything is good. Thank you to the team at Arab Saudi Bank.	Abogana Rezek	2023-06-18 00:07:29	نحن سعيدين بمشاركتنا رأيك وتجربتك معنا ونتطلع لرؤيتك مجددا. شكرا لزيارتك.	2023-06-20 07:11:11	11	ar	us		5	ar	praise allah problem update application open praise allah everything good thank team arab saudi bank	Positive	0	1	0
Google Play Store	ba4ff955-143b-455e-85bc-b116436ca62d	Very beautiful	mubarak siddig	2023-06-17 10:24:19	نحن سعيدين بمشاركتنا رأيك وتجربتك معنا ونتطلع لرؤيتك مجددا. شكرا لزيارتك.	2023-06-20 07:14:36	0	ar	us		5	ar	beautiful	Positive	0	0	0
Google Play Store	6706b193-4a5d-4538-bb9a-3f8308dc13e8	The worst customer service ever, they don't provide any help or benefit 😡😡	ahmed ashour	2023-06-17 09:47:43	نعتذر للمشكلة التي واجهتك ونشكر لك ملاحظاتك لمساعدتك يرجى مشاركتنا تفاصيل المشكلة التي واجهتك عبر الرابط https://anb.tw/3Vpq1cv شكرا لزيارتك.	2023-06-20 07:15:35	3	ar	us		1	ar	bad customer service ever dont provide help benefit	Negative	1	0	0
Google Play Store	f958e782-cc9a-4180-9a90-9b7fd953b16f	I swear to God Almighty, if I wasn't tied to a loan from Arab Bank, I would close my account right now. Its system has been the same since its establishment. No development, no services, no response from the customer service hotline. Even for a traffic card renewal, you have to go to the branch and they charge you over 30 riyals for renewal fees. Meanwhile, other banks send you a new card two mon…	أبو هاشم العامري	2023-06-17 03:33:53	نعتذر للمشكلة التي واجهتك ونشكر لك ملاحظاتك لمساعدتك يرجى مشاركتنا تفاصيل المشكلة التي واجهتك عبر الرابط https://anb.tw/3Vpq1cv شكرا لزيارتك.	2023-06-20 07:16:54	4	ar	us		5	ar	swear god almighty wasnt tie loan arab bank would close account right system since establishment development service response customer service hotline even traffic card renewal go branch charge riyals renewal fee meanwhile bank send new card two months expire without charge single riyal renewal fee dont even want mention name bank oh arab bank please improve service	Negative	1	1	0
Google Play Store	3d086775-a867-47a7-8319-f43719cb36e7	Every time I enter the application, it says please set the location, even though my location is enabled. What could be the reason?	صعب المنال	2023-06-16 11:25:24	نعتذر للمشكلة التي واجهتك ونشكر لك ملاحظاتك لمساعدتك يرجى مشاركتنا تفاصيل المشكلة التي واجهتك عبر الرابط https://anb.tw/3Vpq1cv شكرا لزيارتك.	2023-06-20 07:18:23	3	ar	us		1	ar	every time enter application say please set location even though location enable could reason	Neutral	0	1	0
Google Play Store	6e5c7f6e-175e-4020-ae61-14919dcb4ddb	Very beautiful and useful.	zooom57111 seed	2023-06-15 12:59:51	نحن سعيدين بمشاركتنا رأيك وتجربتك معنا ونتطلع لرؤيتك مجددا. شكرا لزيارتك.	2023-06-20 07:36:43	0	ar	us		5	ar	beautiful useful	Positive	0	0	0
Google Play Store	882077f1-7b48-4f67-8f37-fc917c45f13c	Unfortunately, every time there is an update, it is for the worse, and the response to customers is clear indifference and lack of care.	Eqab Basheer	2023-06-15 10:11:38	نعتذر للمشكلة التي واجهتك ونشكر لك ملاحظاتك لمساعدتك يرجى مشاركتنا تفاصيل المشكلة التي واجهتك عبر الرابط https://anb.tw/3Vpq1cv شكرا لزيارتك.	2023-06-20 07:37:09	3	ar	us		1	ar	unfortunately every time update bad response customers clear indifference lack care	Negative	1	0	0
Google Play Store	dc15c345-3b01-4b81-b188-d84a50884c48	Bad application	الواثق بالله	2023-06-15 01:13:54	نعتذر للمشكلة التي واجهتك ونشكر لك ملاحظاتك لمساعدتك يرجى مشاركتنا تفاصيل المشكلة التي واجهتك عبر الرابط https://anb.tw/3Vpq1cv شكرا لزيارتك.	2023-06-20 07:37:53	0	ar	us		1	ar	bad application	Negative	1	0	0
Google Play Store	1ad7f25d-c7ce-41a7-82ba-2b0fbab7a53d	"The application did not open, update, update."	الاجرد القرييط	2023-06-14 16:35:38	نعتذر للمشكلة التي واجهتك ونشكر لك ملاحظاتك لمساعدتك يرجى مشاركتنا تفاصيل المشكلة التي واجهتك عبر الرابط https://anb.tw/3Vpq1cv شكرا لزيارتك.	2023-06-20 07:38:07	0	ar	us		2	ar	application open update update	Negative	0	1	0
Google Play Store	75e81c07-a404-44d5-a323-eaf60db00eaf	The best bank in Saudi Arabia in terms of ease of dealing, respect, professionalism of employees, and speed of response. Mashallah for them.	موحمد ماحمود	2023-06-14 12:13:40	نحن سعيدين بمشاركتنا رأيك وتجربتك معنا ونتطلع لرؤيتك مجددا. شكرا لزيارتك.	2023-06-20 07:39:13	0	ar	us		5	ar	best bank saudi arabia term ease deal respect professionalism employees speed response mashallah	Positive	0	0	0
Google Play Store	3840d374-0039-406d-b975-3d533f668ecd	I hope the bank will review the application because it has become very bad even though it used to be much better at first.	Ali Ali	2023-06-14 08:50:48	شكرا لك سوف يتم اخذ ملاحظتك بعين الاعتبار ، نتطلع لرؤيتك مجددا. شكرا لزيارتك.	2023-06-20 07:41:05	1	ar	us		1	ar	hope bank review application become bad even though use much good first	Negative	1	0	0
Google Play Store	2ca955f2-7d6a-46a7-ab91-4777908f5056	"This is a strange application, there is no update. Where do we update from?"	أم رائد الحربي	2023-06-14 05:45:26	نعتذر للمشكلة التي واجهتك ونشكر لك ملاحظاتك لمساعدتك يرجى مشاركتنا تفاصيل المشكلة التي واجهتك عبر الرابط https://anb.tw/3Vpq1cv شكرا لزيارتك.	2023-06-20 07:41:24	0	ar	us		2	ar	strange application update update	Negative	1	0	0
Google Play Store	f809fd72-bb01-4039-898d-ba2f06f261ba	This is causing me trouble, the application won't open and I urgently need to transfer money.	ALI AL ABBADI	2023-06-14 05:08:08	نعتذر للمشكلة التي واجهتك ونشكر لك ملاحظاتك لمساعدتك يرجى مشاركتنا تفاصيل المشكلة التي واجهتك عبر الرابط https://anb.tw/3Vpq1cv شكرا لزيارتك.	2023-06-20 07:41:32	0	ar	us		1	ar	cause trouble application wont open urgently need transfer money	Negative	0	1	0
Google Play Store	5f5653a3-996f-4159-a05e-2440b4fdd8c3	Very nice application	عمر	2023-06-13 22:27:31	نعتذر للمشكلة التي واجهتك ونشكر لك ملاحظاتك لمساعدتك يرجى مشاركتنا تفاصيل المشكلة التي واجهتك عبر الرابط https://anb.tw/3Vpq1cv شكرا لزيارتك.	2023-06-20 07:41:38	0	ar	us		1	ar	nice application	Positive	0	0	0
Google Play Store	2143531a-9008-4afb-b69f-7204dd2b7ebd	The application sometimes crashes, and I am unable to access it. However, when it does open, it is very beautiful.	Abdullah Fahd	2023-06-13 16:59:30	نعتذر للمشكلة التي واجهتك ونشكر لك ملاحظاتك لمساعدتك يرجى مشاركتنا تفاصيل المشكلة التي واجهتك عبر الرابط https://anb.tw/3Vpq1cv شكرا لزيارتك.	2023-06-20 07:44:00	33	ar	us		3	ar	application sometimes crash unable access however open beautiful	Negative	0	1	0
Google Play Store	fcc44896-75cc-4047-b7d4-20c882088f19	Peace be upon you and the mercy of Allah. The application is not running for me, I have been working with it for three years. What is the solution and how can I benefit from it, please?	ادم محمد	2023-06-13 10:53:34	نعتذر للمشكلة التي واجهتك ونشكر لك ملاحظاتك لمساعدتك يرجى مشاركتنا تفاصيل المشكلة التي واجهتك عبر الرابط https://anb.tw/3Vpq1cv شكرا لزيارتك.	2023-06-20 07:43:35	0	ar	us		2	ar	peace upon mercy allah application run work three years solution benefit please	Neutral	1	1	0
Google Play Store	026befc8-41ea-4dac-bb2e-a665dc392522	the worst application reflects poor management.	Bj Otabi	2023-06-13 10:35:54	نعتذر للمشكلة التي واجهتك ونشكر لك ملاحظاتك لمساعدتك يرجى مشاركتنا تفاصيل المشكلة التي واجهتك عبر الرابط https://anb.tw/3Vpq1cv شكرا لزيارتك.	2023-06-20 07:43:27	0	ar	us		1	ar	bad application reflect poor management	Negative	1	0	0
Google Play Store	92e81ec2-1d2f-409e-b1de-defb7498bf74	The program is called "bad" in Arabic. Note: "bad" translates to "Father of Dog" in English.	سليمان هروبي	2023-06-13 09:35:12	نعتذر للمشكلة التي واجهتك ونشكر لك ملاحظاتك لمساعدتك يرجى مشاركتنا تفاصيل المشكلة التي واجهتك عبر الرابط https://anb.tw/3Vpq1cv شكرا لزيارتك.	2023-06-20 07:43:18	0	ar	us		1	ar	program call bad arabic note bad translate father dog english	Negative	1	0	0
Google Play Store	b9dfdf0c-59bf-4f62-b318-63bcbdb5bcee	It cannot be installed.	الحياة حلوه تفائلوا	2023-06-12 21:01:28	نعتذر للمشكلة التي واجهتك ونشكر لك ملاحظاتك لمساعدتك يرجى مشاركتنا تفاصيل المشكلة التي واجهتك عبر الرابط https://anb.tw/3Vpq1cv شكرا لزيارتك.	2023-06-20 07:45:55	0	ar	us		1	ar	instal	Negative	0	1	0
Google Play Store	58ada10d-75f2-4922-ae2c-b37ca944129a	Very, very good, truly wonderful.	Abdullah	2023-06-12 13:08:46	نحن سعيدين بمشاركتنا رأيك وتجربتك معنا ونتطلع لرؤيتك مجددا. شكرا لزيارتك.	2023-06-14 05:28:35	0	ar	us		4	ar	good truly wonderful	Positive	0	0	0
Google Play Store	9304ac91-8871-4d4a-a7a9-e64f502ec385	Very bad. The application doesn't open and it freezes, it's unresponsive. I wish they would have learned from other company and banking applications.	khaled saad alryies	2023-06-11 14:50:59	نعتذر للمشكلة التي واجهتك ونشكر لك ملاحظاتك لمساعدتك يرجى مشاركتنا تفاصيل المشكلة التي واجهتك عبر الرابط https://anb.tw/3Vpq1cv شكرا لزيارتك.	2023-06-14 05:29:45	4	ar	us		1	ar	bad application doesnt open freeze unresponsive wish would learn company bank applications	Negative	1	1	1
Google Play Store	ce0075e5-5832-4be1-b18c-35eaa13a6578	The application is terrible. Every time it asks me to specify my location, I do so but it doesn't open for me. Also, it asks me to update the application and I do so but it still doesn't open. Find a solution for this because it's not even worth a rating.	Najah Almajdi	2023-06-11 13:23:56	نعتذر للمشكلة التي واجهتك ونشكر لك ملاحظاتك لمساعدتك يرجى مشاركتنا تفاصيل المشكلة التي واجهتك عبر الرابط https://anb.tw/3Vpq1cv شكرا لزيارتك.	2023-06-14 05:29:38	16	ar	us		1	ar	application terrible every time ask specify location doesnt open also ask update application still doesnt open find solution even worth rat	Negative	1	1	0
Google Play Store	faf39a6a-4861-4dcf-975e-fde3b5f1dfe0	The application has become very bad since the last update.	ناصر العبدلي	2023-06-11 00:34:20	نعتذر للمشكلة التي واجهتك ونشكر لك ملاحظاتك لمساعدتك يرجى مشاركتنا تفاصيل المشكلة التي واجهتك عبر الرابط https://anb.tw/3Vpq1cv شكرا لزيارتك.	2023-06-14 05:31:33	0	ar	us		2	ar	application become bad since last update	Negative	1	0	0
Google Play Store	f4ae384b-95ab-476d-8442-99b39f56ba2e	Fix the program properly, every time we open it there is an update and it keeps speaking.	صالحه العبسي	2023-06-10 18:10:10	نعتذر للمشكلة التي واجهتك ونشكر لك ملاحظاتك لمساعدتك يرجى مشاركتنا تفاصيل المشكلة التي واجهتك عبر الرابط https://anb.tw/3Vpq1cv شكرا لزيارتك.	2023-06-14 05:31:43	0	ar	us		1	ar	fix program properly every time open update keep speak	Negative	0	1	0
Google Play Store	2c6b64da-49f1-4121-8683-84b92a861013	The application has become very bad and it is not working properly. It keeps telling me there is a connection error.	ابو فهد باسم	2023-06-10 17:11:36	نعتذر للمشكلة التي واجهتك ونشكر لك ملاحظاتك لمساعدتك يرجى مشاركتنا تفاصيل المشكلة التي واجهتك عبر الرابط https://anb.tw/3Vpq1cv شكرا لزيارتك.	2023-06-14 05:31:51	0	ar	us		1	ar	application become bad work properly keep tell connection error	Negative	1	1	0
Google Play Store	7467249f-6aa7-4c45-bf62-46dbb8837f31	I don't know why measurements on other banking applications are considered very poor.	هدى حسين عبد الله	2023-06-10 13:49:43	نعتذر للمشكلة التي واجهتك ونشكر لك ملاحظاتك لمساعدتك يرجى مشاركتنا تفاصيل المشكلة التي واجهتك عبر الرابط https://anb.tw/3Vpq1cv شكرا لزيارتك.	2023-06-14 05:32:01	0	ar	us		1	ar	dont know measurements bank applications consider poor	Negative	1	0	0
Google Play Store	d8aeda35-e891-4366-a628-6b1100b2a550	Slow down with the application	عبدالله الغامدي	2023-06-10 13:31:14	نعتذر للمشكلة التي واجهتك ونشكر لك ملاحظاتك لمساعدتك يرجى مشاركتنا تفاصيل المشكلة التي واجهتك عبر الرابط https://anb.tw/3Vpq1cv شكرا لزيارتك.	2023-06-14 05:32:06	0	ar	us		1	ar	slow application	Neutral	0	0	1
Google Play Store	cbb68a51-13fb-4398-87bd-644c91522120	One of the best applications, easy to use and fast.	Fahad Alsareyf	2023-06-10 09:18:11	نحن سعيدين بمشاركتنا رأيك وتجربتك معنا ونتطلع لرؤيتك مجددا. شكرا لزيارتك.	2023-06-14 05:32:49	0	ar	us		5	ar	one best applications easy use fast	Positive	0	0	0
Google Play Store	be87f2fe-033b-456a-bbc9-39a691f8f259	A very complex application in entering account opening data (place of birth), all countries are not available and even in the occupation field, only certain professions are mentioned.	أبوبكر شوكت	2023-06-09 11:56:42	نعتذر للمشكلة التي واجهتك ونشكر لك ملاحظاتك لمساعدتك يرجى مشاركتنا تفاصيل المشكلة التي واجهتك عبر الرابط https://anb.tw/3Vpq1cv شكرا لزيارتك.	2023-06-11 05:12:10	1	ar	us		1	ar	complex application enter account open data place birth countries available even occupation field certain professions mention	Negative	1	1	0
Google Play Store	6d8cc056-1343-491c-9219-24b4b709c057	SADFD	Mansoor Ahmed	2023-06-08 20:30:21	نعتذر للمشكلة التي واجهتك ونشكر لك ملاحظاتك لمساعدتك يرجى مشاركتنا تفاصيل المشكلة التي واجهتك عبر الرابط https://anb.tw/3Vpq1cv شكرا لزيارتك.	2023-06-11 05:11:25	17	ar	us		1	ar	sadfd	Negative	1	0	0
Google Play Store	145d4b4e-4461-4f4c-94c4-3fcc553aa9d2	The worst bank ever in terms of services or program, and God willing, I will leave it and cancel my bank account permanently.	Cobra	2023-06-08 11:53:13	نعتذر للمشكلة التي واجهتك ونشكر لك ملاحظاتك لمساعدتك يرجى مشاركتنا تفاصيل المشكلة التي واجهتك عبر الرابط https://anb.tw/3Vpq1cv شكرا لزيارتك.	2023-06-11 05:11:07	0	ar	us		1	ar	bad bank ever term service program god will leave cancel bank account permanently	Negative	1	1	0
Google Play Store	2591c9e1-ef6f-4b5d-adb0-74c2b86ea05e	The problem has been resolved and everything is fine now. Thank you.	Alfa- Aila-	2023-06-07 20:52:07	نحن سعيدين بمشاركتنا رأيك وتجربتك معنا ونتطلع لرؤيتك مجددا. شكرا لزيارتك.	2023-06-11 05:09:25	0	ar	us		5	ar	problem resolve everything fine thank	Positive	0	0	0
Google Play Store	22a5fd83-80d9-4c3a-8df1-4c4a86730e7d	May Allah reward you with goodness for the easy and accessible services you provide.	سميره محمد	2023-06-07 05:14:46	نحن سعيدين بمشاركتنا رأيك وتجربتك معنا ونتطلع لرؤيتك مجددا. شكرا لزيارتك.	2023-06-11 05:06:20	0	ar	us		5	ar	may allah reward goodness easy accessible service provide	Positive	1	0	0
Google Play Store	b4c6328a-4449-49b0-8c25-23f2ddcd7672	Best bank	صلاح الاحمدي	2023-06-05 18:17:38	نحن سعيدين بمشاركتنا رأيك وتجربتك معنا ونتطلع لرؤيتك مجددا. شكرا لزيارتك.	2023-06-08 10:13:59	0	ar	us		5	ar	best bank	Positive	0	0	0
Google Play Store	57c083cb-7658-4862-9266-83d5112e3b2e	Not very bad at all.	ميمووو 15	2023-06-05 09:20:54	نعتذر للمشكلة التي واجهتك ونشكر لك ملاحظاتك لمساعدتك يرجى مشاركتنا تفاصيل المشكلة التي واجهتك عبر الرابط https://anb.tw/3Vpq1cv شكرا لزيارتك.	2023-06-11 05:34:28	0	ar	us		2	ar	bad	Positive	1	0	0
Google Play Store	f4b59563-1c04-403a-853e-97ba405e8b4c	The application did not open and I have tried a lot, I don't know where the problem is.	montaser nasr	2023-06-04 09:59:07	نعتذر للمشكلة التي واجهتك ونشكر لك ملاحظاتك لمساعدتك يرجى مشاركتنا تفاصيل المشكلة التي واجهتك عبر الرابط https://anb.tw/3Vpq1cv شكرا لزيارتك.	2023-06-11 05:34:56	1	ar	us		1	ar	application open try lot dont know problem	Negative	0	1	0
Google Play Store	654475ae-9d2a-429f-81e8-e515f7a387bc	Accredited bank	Ahmed Gapra	2023-06-03 21:05:34	نحن سعيدين بمشاركتنا رأيك وتجربتك معنا ونتطلع لرؤيتك مجددا. شكرا لزيارتك.	2023-06-11 05:35:33	0	ar	us		5	ar	accredit bank	Neutral	0	1	0
Google Play Store	49764ef2-1721-436f-b521-efd6389ad523	Heavy after the update.	hamdan zahrani	2023-06-03 21:04:12	شكرا لك سوف يتم اخذ ملاحظتك بعين الاعتبار ، نتطلع لرؤيتك مجددا. شكرا لزيارتك.	2023-06-11 05:35:14	0	ar	us		4	ar	heavy update	Neutral	0	0	1
Google Play Store	8be3be69-6b2d-4a8a-a64e-b1d4b493cb85	The application does not open for me, unfortunately.	mohamad Omar	2023-06-02 21:48:48	نعتذر للمشكلة التي واجهتك ونشكر لك ملاحظاتك لمساعدتك يرجى مشاركتنا تفاصيل المشكلة التي واجهتك عبر الرابط https://anb.tw/3Vpq1cv شكرا لزيارتك.	2023-06-05 06:46:34	0	ar	us		1	ar	application open unfortunately	Negative	0	1	0
Google Play Store	4d65a565-5d6b-4c44-bdbf-cd37212925d1	I need more development.	Emad Hamdi	2023-06-02 10:10:24	شكرا لك سوف يتم اخذ ملاحظتك بعين الاعتبار ، نتطلع لرؤيتك مجددا. شكرا لزيارتك.	2023-06-05 06:46:15	0	ar	us		5	ar	need development	Neutral	1	0	0
Google Play Store	ec471d97-f52a-48e6-a363-bfb70872281b	Subject: 5225; Service Range: SAR 76.99; To: Google RoxiVPN; Date: 23-06-02 03; Signature: Abdullah bin Muflehh Al-Juhani. Bisha. Charges for a private mobile phone tweet service like others. Stay safe. Thank you.	عبدالله بن مفلح الجهمي	2023-06-02 00:36:19	نعتذر للمشكلة التي واجهتك ونشكر لك ملاحظاتك لمساعدتك يرجى مشاركتنا تفاصيل المشكلة التي واجهتك عبر الرابط https://anb.tw/3Vpq1cv شكرا لزيارتك.	2023-06-04 18:04:36	0	ar	us		4	ar	subject service range sar google roxivpn date signature abdullah bin muflehh aljuhani bisha charge private mobile phone tweet service like others stay safe thank	Neutral	0	1	0
Google Play Store	dca25479-f963-4edc-85bc-5305545b74fb	Why can't I add Sudan as my birth country? It is not available.	anoos Taha	2023-05-31 07:28:53	نعتذر للمشكلة التي واجهتك ونشكر لك ملاحظاتك لمساعدتك يرجى مشاركتنا تفاصيل المشكلة التي واجهتك عبر الرابط https://anb.tw/3Vpq1cv شكرا لزيارتك.	2023-06-04 18:06:43	0	ar	us		1	ar	cant add sudan birth country available	Negative	0	1	0
Google Play Store	d5ebc1b0-0e81-49a8-9867-821929e7746a	I have a problem, every time I try to log in, it says I have reached the maximum limit of devices.	alharbi alharbi	2023-05-31 04:52:15	نعتذر للمشكلة التي واجهتك ونشكر لك ملاحظاتك لمساعدتك يرجى مشاركتنا تفاصيل المشكلة التي واجهتك عبر الرابط https://anb.tw/3Vpq1cv شكرا لزيارتك.	2023-06-04 18:01:54	0	ar	us		5	ar	problem every time try log say reach maximum limit devices	Negative	0	1	0
Google Play Store	d67eeb7d-d4bb-41e3-9075-453140695241	I cannot add beneficiaries. What is the problem?	ام فلهومة	2023-05-30 14:23:34	نعتذر للمشكلة التي واجهتك ونشكر لك ملاحظاتك لمساعدتك يرجى مشاركتنا تفاصيل المشكلة التي واجهتك عبر الرابط https://anb.tw/3Vpq1cv شكرا لزيارتك.	2023-06-04 18:03:01	0	ar	us		4	ar	add beneficiaries problem	Negative	0	1	0
Google Play Store	d148ef37-5e36-4229-9cd5-15512e05786f	Excellent and very comfortable.	الرشيد السوداني	2023-05-30 13:32:01	نحن سعيدين بمشاركتنا رأيك وتجربتك معنا ونتطلع لرؤيتك مجددا. شكرا لزيارتك.	2023-06-04 18:03:27	0	ar	us		5	ar	excellent comfortable	Positive	0	0	0
Google Play Store	77604cec-f75b-4ee3-9229-1e804d49048f	I have exceeded the daily limit for adding beneficiaries. I am a new customer and I successfully opened an account, but I couldn't add the beneficiary. Please solve the problem.	علي صديق	2023-05-29 09:04:01	نعتذر للمشكلة التي واجهتك ونشكر لك ملاحظاتك لمساعدتك يرجى مشاركتنا تفاصيل المشكلة التي واجهتك عبر الرابط https://anb.tw/3Vpq1cv شكرا لزيارتك.	2023-06-04 18:03:47	0	ar	us		1	ar	exceed daily limit add beneficiaries new customer successfully open account couldnt add beneficiary please solve problem	Negative	0	1	0
Google Play Store	659d1621-1992-483b-969e-4521047119f9	Inshallah, good.	عمر العمراني	2023-05-28 10:49:17	نحن سعيدين بمشاركتنا رأيك وتجربتك معنا ونتطلع لرؤيتك مجددا. شكرا لزيارتك.	2023-06-04 18:04:18	0	ar	us		5	ar	inshallah good	Positive	0	0	0
Google Play Store	0853f46e-e633-486a-b528-a1a2da32c4f3	The application is very bad. I want to log in and a red screen appears telling me to try again. Please solve the problem.	ادم عمر	2023-05-28 09:06:59	نعتذر للمشكلة التي واجهتك ونشكر لك ملاحظاتك لمساعدتك يرجى مشاركتنا تفاصيل المشكلة التي واجهتك عبر الرابط https://anb.tw/3Vpq1cv شكرا لزيارتك.	2023-06-04 17:55:13	0	ar	us		1	ar	application bad want log red screen appear tell try please solve problem	Negative	1	1	0
Google Play Store	ac560bca-ecef-4776-b160-ea916fb9ee2b	Very bad compared to Al Rajhi. The same problem exists in both the new and old application. It is not possible to change the username. Recharging is only available for amounts less than 100 SAR.	يحيى الهلالي	2023-05-27 22:11:36	نعتذر للمشكلة التي واجهتك ونشكر لك ملاحظاتك لمساعدتك يرجى مشاركتنا تفاصيل المشكلة التي واجهتك عبر الرابط https://anb.tw/3Vpq1cv شكرا لزيارتك.	2023-06-04 17:55:45	3	ar	us		1	ar	bad compare al rajhi problem exist new old application possible change username recharge available amount less sar	Negative	1	1	0
Google Play Store	8a1ee3c5-c131-47a0-9c5b-776fb34f859a	good	محمد احمد	2023-05-27 12:47:59	نحن سعيدين بمشاركتنا رأيك وتجربتك معنا ونتطلع لرؤيتك مجددا. شكرا لزيارتك.	2023-06-04 17:57:26	0	ar	us		5	ar	good	Positive	0	0	0
Google Play Store	78f007fd-9ecb-4449-ba61-4d6b471f7917	Excellent, Ahmed.	Ahmed7014 الزبيدي	2023-05-26 23:52:21	نحن سعيدين بمشاركتنا رأيك وتجربتك معنا ونتطلع لرؤيتك مجددا. شكرا لزيارتك.	2023-06-04 18:00:01	0	ar	us		5	ar	excellent ahmed	Positive	0	0	0
Google Play Store	9cabf51c-bf12-4522-ae19-c97a173095b2	The application has been malfunctioning and not working after the recent update. I always receive a message saying that the time has expired and it doesn't open for me.	Atia madkoor	2023-05-26 19:40:48	نعتذر للمشكلة التي واجهتك ونشكر لك ملاحظاتك لمساعدتك يرجى مشاركتنا تفاصيل المشكلة التي واجهتك عبر الرابط https://anb.tw/3Vpq1cv شكرا لزيارتك.	2023-06-04 18:00:14	0	ar	us		1	ar	application malfunction work recent update always receive message say time expire doesnt open	Negative	0	1	0
Google Play Store	7d4d5ab4-06d3-46ba-915a-3ef2fc524165	The application does not work as it deserves. It is not worth even a single star, it deserves a negative zero 0-.	محمد عبدالله	2023-05-25 06:04:43	نعتذر للمشكلة التي واجهتك ونشكر لك ملاحظاتك لمساعدتك يرجى مشاركتنا تفاصيل المشكلة التي واجهتك عبر الرابط https://anb.tw/3Vpq1cv شكرا لزيارتك.	2023-06-04 17:53:59	0	ar	us		1	ar	application work deserve worth even single star deserve negative zero	Negative	1	0	0
Google Play Store	45ce059c-cc75-404a-aa05-f6d205a03690	Successful and outstanding.... Thank you very much.	علي السهيمي	2023-05-24 19:07:32	نحن سعيدين بمشاركتنا رأيك وتجربتك معنا ونتطلع لرؤيتك مجددا. شكرا لزيارتك.	2023-06-04 17:54:51	0	ar	us		5	ar	successful outstanding thank much	Positive	0	0	0
Google Play Store	1fef9b3c-fc4e-44b3-99cc-12ef24d0286d	"The application is nice and excellent. It was working well but now it has stopped. I am unable to open the application."	Montaser Altayeb	2023-05-24 08:41:30	نعتذر للمشكلة التي واجهتك ونشكر لك ملاحظاتك لمساعدتك يرجى مشاركتنا تفاصيل المشكلة التي واجهتك عبر الرابط https://anb.tw/3Vpq1cv شكرا لزيارتك.	2023-06-04 17:51:29	0	ar	us		4	ar	application nice excellent work well stop unable open application	Positive	0	1	0
Google Play Store	3b7560e5-39e8-43e8-b036-6d6e0cc13002	The problem is, every time I try to enter the numbers, I try once and twice until it adds up and opens.	محمد رزق	2023-05-24 08:36:12	نعتذر للمشكلة التي واجهتك ونشكر لك ملاحظاتك لمساعدتك يرجى مشاركتنا تفاصيل المشكلة التي واجهتك عبر الرابط https://anb.tw/3Vpq1cv شكرا لزيارتك.	2023-06-04 17:51:20	0	ar	us		1	ar	problem every time try enter number try twice add open	Negative	0	1	0
Google Play Store	99ae6e05-be5a-4f8f-97eb-9103c7b57e55	I have actually created an account but I don't know how to access the program. A credit card is required, but I don't have one.	Mohamed	2023-05-19 06:45:44	نعتذر للمشكلة التي واجهتك ونشكر لك ملاحظاتك لمساعدتك يرجى مشاركتنا تفاصيل المشكلة التي واجهتك عبر الرابط https://anb.tw/3Vpq1cv شكرا لزيارتك.	2023-05-21 13:15:07	0	ar	us		1	ar	actually create account dont know access program credit card require dont one	Neutral	0	1	0
Google Play Store	795ea7f3-55fb-41c0-b2a8-64a41262766e	The application, I don't know, seems complicated. I go through the procedures and then it stops. It's as if I haven't done anything after all of that. Then it says that the user is inactive. Please simplify and clarify the necessary steps to open and process an account in your terrible application. This program of yours has vulnerabilities that target I don't know what. But I want a clear respons…	Sultan Altayar	2023-05-18 15:44:31	نعتذر للمشكلة التي واجهتك ونشكر لك ملاحظاتك لمساعدتك يرجى مشاركتنا تفاصيل المشكلة التي واجهتك عبر الرابط https://anb.tw/3Vpq1cv شكرا لزيارتك.	2023-05-21 13:04:26	0	ar	us		1	ar	application dont know seem complicate go procedures stop havent do anything say user inactive please simplify clarify necessary step open process account terrible application program vulnerabilities target dont know want clear response include clear fast solution precise understand issue reason behind suggestions mention may correct incorrect strongly desire know familiarize rat deserve even frac…	Negative	1	1	0
Google Play Store	8458fcaf-12bb-481e-b184-af9a93ec8827	Now I enter the application and it doesn't open with me.	Ahmed111 Awooda35	2023-05-18 14:50:02	نعتذر للمشكلة التي واجهتك ونشكر لك ملاحظاتك لمساعدتك يرجى مشاركتنا تفاصيل المشكلة التي واجهتك عبر الرابط https://anb.tw/3Vpq1cv شكرا لزيارتك.	2023-05-21 13:04:32	0	ar	us		1	ar	enter application doesnt open	Negative	0	1	0
Google Play Store	3f01055e-2080-462a-9549-e07afc2bb639	For over a week, I have been unable to access the application; it keeps showing that there is a problem with the system.	الشهري نعنوعه	2023-05-18 13:01:04	نعتذر للمشكلة التي واجهتك ونشكر لك ملاحظاتك لمساعدتك يرجى مشاركتنا تفاصيل المشكلة التي واجهتك عبر الرابط https://anb.tw/3Vpq1cv شكرا لزيارتك.	2023-05-21 13:04:41	0	ar	us		1	ar	week unable access application keep show problem system	Negative	0	1	0
Google Play Store	b4fe39c1-ea0e-4845-b875-d2f695954240	A bank deserving of appreciation and respect, and all the employees in it serve you to resolve your problem. I had a problem with the application and they contacted me and resolved the issue. Thank you Arab Bank.	سالم عيظة ال توفيق	2023-05-14 12:50:42	نحن سعيدين بمشاركتنا رأيك وتجربتك معنا ونتطلع لرؤيتك مجددا. شكرا لزيارتك.	2023-05-17 22:58:40	0	ar	us		5	ar	bank deserve appreciation respect employees serve resolve problem problem application contact resolve issue thank arab bank	Positive	1	0	0
Google Play Store	535e24ed-3576-42cc-aa09-3f972a09b004	All Saudi banks have an excellent application, but the application freezes when requesting a loan or issuing a prepaid credit card. It also displays an error message and an English code in the application, while ArabNet is still using an outdated system that is no longer relevant. Even when logging in, it randomly logs the customer out of the browser for no reason. We ask you to develop your elec…	اسد مفترس	2023-05-14 07:34:35	نعتذر للمشكلة التي واجهتك ونشكر لك ملاحظاتك لمساعدتك يرجى مشاركتنا تفاصيل المشكلة التي واجهتك عبر الرابط https://anb.tw/3Vpq1cv شكرا لزيارتك.	2023-05-17 22:58:22	0	ar	us		1	ar	saudi bank excellent application application freeze request loan issue prepay credit card also display error message english code application arabnet still use outdated system long relevant even log randomly log customer browser reason ask develop electronic bank service bank application well arabnet allow issuance cancellation card via arabnet arabi mobile necessary improve service line electron…	Negative	1	1	1
Google Play Store	0b2b7fbe-6ff5-46c7-b07d-1002222e6612	God, I have suffered a lot. No one has registered in my account for two and a half years, and I have been trying to log in, but it won't let me.	511	2023-05-13 21:18:11	نعتذر للمشكلة التي واجهتك ونشكر لك ملاحظاتك لمساعدتك يرجى مشاركتنا تفاصيل المشكلة التي واجهتك عبر الرابط https://anb.tw/3Vpq1cv شكرا لزيارتك.	2023-05-17 22:57:23	0	ar	us		1	ar	god suffer lot one register account two half years try log wont let	Negative	0	1	0
Google Play Store	988aa650-d5ec-4551-9476-21e9d2a3574f	The program "Kulma Akhush Hisab" doesn't let me access my account.	فايز القحطاني	2023-05-12 17:09:21	نعتذر للمشكلة التي واجهتك ونشكر لك ملاحظاتك لمساعدتك يرجى مشاركتنا تفاصيل المشكلة التي واجهتك عبر الرابط https://anb.tw/3Vpq1cv شكرا لزيارتك.	2023-05-15 21:47:35	0	ar	us		3	ar	program kulma akhush hisab doesnt let access account	Negative	0	1	0
Google Play Store	7a6d9dff-fe50-4fc8-ae8b-0a154dd330c4	What is the login record?	عبدالله الجهني	2023-05-12 09:55:41	نعتذر للمشكلة التي واجهتك ونشكر لك ملاحظاتك لمساعدتك يرجى مشاركتنا تفاصيل المشكلة التي واجهتك عبر الرابط https://anb.tw/3Vpq1cv شكرا لزيارتك.	2023-05-15 21:47:26	0	ar	us		1	ar	login record	Neutral	0	1	0
Google Play Store	5ac1a99e-2b1c-4f40-ba20-0e0bd33e8a6f	Very very bad and does not work. I advise against downloading it.	Mousa S	2023-05-11 18:06:49	نعتذر للمشكلة التي واجهتك ونشكر لك ملاحظاتك لمساعدتك يرجى الاتصال بنا على 8001244040 او يمكنك مراسلتنا على حسابنا في تويتر @anb_care شكرا لك	2023-05-15 08:54:38	0	ar	us		1	ar	bad work advise download	Negative	1	1	0
Google Play Store	78051218-8d49-4149-8c9b-55ed78b3e874	The program is not opening.	Mahmoud Elhawary	2023-05-11 12:52:25	نعتذر للمشكلة التي واجهتك ونشكر لك ملاحظاتك لمساعدتك يرجى الاتصال بنا على 8001244040 او يمكنك مراسلتنا على حسابنا في تويتر @anb_care شكرا لك	2023-05-15 08:54:29	0	ar	us		1	ar	program open	Neutral	0	1	0
Google Play Store	a59eaa50-51a7-4097-aa45-770c76337803	The application is not working at all. Every time I try to log in, it tells me a connection error. What should I do? I have been facing this issue for over a week.	Mahmoud Elhawary	2023-05-11 06:19:39	نعتذر للمشكلة التي واجهتك ونشكر لك ملاحظاتك لمساعدتك يرجى الاتصال بنا على 8001244040 او يمكنك مراسلتنا على حسابنا في تويتر @anb_care شكرا لك	2023-05-15 08:54:21	0	ar	us		5	ar	application work every time try log tell connection error face issue week	Negative	0	1	0
Google Play Store	fcd8e930-0db6-49a4-9e9a-c4e3f5b60287	The application is not working for me. Every time I try to log in, it says "You don't have an account." So, please provide me with the necessary information.	فيصل هوساوي	2023-05-11 01:43:02	نعتذر للمشكلة التي واجهتك ونشكر لك ملاحظاتك لمساعدتك يرجى الاتصال بنا على 8001244040 او يمكنك مراسلتنا على حسابنا في تويتر @anb_care شكرا لك	2023-05-15 08:54:11	0	ar	us		1	ar	application work every time try log say dont account please provide necessary information	Negative	0	1	0
Google Play Store	07a018c9-82dd-492d-a0e4-c306962039a0	Good, but it needs frequent updating.	ابو غاليه الشيباني	2023-05-10 05:00:42	نعتذر للمشكلة التي واجهتك ونشكر لك ملاحظاتك لمساعدتك يرجى الاتصال بنا على 8001244040 او يمكنك مراسلتنا على حسابنا في تويتر @anb_care شكرا لك	2023-05-14 12:25:16	0	ar	us		4	ar	good need frequent update	Neutral	1	0	0
Google Play Store	ebd646dd-e7aa-4a87-9de2-996a70b1216d	My account gets frozen when I try to log in to update my information. It asks me for my information and then says there was an error.	عمار الوحش22	2023-05-09 23:44:06	نعتذر للمشكلة التي واجهتك ونشكر لك ملاحظاتك لمساعدتك يرجى الاتصال بنا على 8001244040 او يمكنك مراسلتنا على حسابنا في تويتر @anb_care شكرا لك	2023-05-14 12:25:07	0	ar	us		1	ar	account get freeze try log update information ask information say error	Negative	0	1	1
Google Play Store	859b68fd-c8f8-4ddc-bc9f-25db4e8b422f	I opened an account 4 months ago and I still haven't received the card.	Noruien Baheer	2023-05-07 18:00:22	نعتذر للمشكلة التي واجهتك ونشكر لك ملاحظاتك لمساعدتك يرجى الاتصال بنا على 8001244040 او يمكنك مراسلتنا على حسابنا في تويتر @anb_care شكرا لك	2023-05-14 12:24:30	0	ar	us		1	ar	open account months ago still havent receive card	Negative	0	1	0
Google Play Store	3dc16d56-67d4-4d9b-a385-8d08d6fc0573	An error occurred while executing the operation... The message keeps repeating without moving on to the next step. I did not benefit from the application. The application is being deleted. Do not use Al Rajhi Bank.	سليمان العبدالله	2023-05-05 07:11:20	نعتذر للمشكلة التي واجهتك ونشكر لك ملاحظاتك لمساعدتك يرجى مشاركتنا تفاصيل المشكلة التي واجهتك عبر الرابط https://anb.tw/3Vpq1cv شكرا لزيارتك.	2023-05-11 04:10:38	0	ar	us		1	ar	error occur execute operation message keep repeat without move next step benefit application application delete use al rajhi bank	Negative	0	1	0
Google Play Store	8db67c95-4b90-4292-b4b5-9179ce87e03f	A sterile and exhausting application.	Rashed Alzahrani	2023-05-04 15:09:29	نعتذر للمشكلة التي واجهتك ونشكر لك ملاحظاتك لمساعدتك يرجى مشاركتنا تفاصيل المشكلة التي واجهتك عبر الرابط https://anb.tw/3Vpq1cv شكرا لزيارتك.	2023-05-11 04:10:13	0	ar	us		1	ar	sterile exhaust application	Negative	1	0	0
Google Play Store	a3c8c307-a32b-41c7-9def-26abd158ded7	It is very bad, and it does not open. It opens the application, and if you try to log in or add any invoice, it refuses and gives you an error message or asks you to try again. Moreover, the application is slow, and in addition to that, you receive a notification that you are not connected to the internet while the internet is working.	abdulla rashid	2023-05-02 04:26:26	نعتذر للمشكلة التي واجهتك ونشكر لك ملاحظاتك لمساعدتك يرجى مشاركتنا تفاصيل المشكلة التي واجهتك عبر الرابط https://anb.tw/3Vpq1cv شكرا لزيارتك.	2023-05-11 04:08:42	0	ar	us		1	ar	bad open open application try log add invoice refuse give error message ask try moreover application slow addition receive notification connect internet internet work	Negative	1	1	1
Google Play Store	feaaf641-0c1f-452d-92b7-084ba7e34f49	The application is slow and does not open the account. Please fix the problem. Thank you for your cooperation. The problem has been resolved and the application has successfully opened.	الزهرة البـرية	2023-04-30 14:20:13	نعتذر للمشكلة التي واجهتك ونشكر لك ملاحظاتك لمساعدتك يرجى مشاركتنا تفاصيل المشكلة التي واجهتك عبر الرابط https://anb.tw/3Vpq1cv شكرا لزيارتك.	2023-05-03 07:55:37	0	ar	us		5	ar	application slow open account please fix problem thank cooperation problem resolve application successfully open	Negative	0	1	0
Google Play Store	f2cd2273-53a6-4b61-9c33-71f7c7aabe90	An outdated application that has not been responsive for two weeks, by God, it is not suitable to be a supplies application.	Moh KS	2023-04-30 03:14:07	نعتذر للمشكلة التي واجهتك ونشكر لك ملاحظاتك لمساعدتك يرجى مشاركتنا تفاصيل المشكلة التي واجهتك عبر الرابط https://anb.tw/3Vpq1cv شكرا لزيارتك.	2023-05-03 07:54:56	0	ar	us		1	ar	outdated application responsive two weeks god suitable supply application	Negative	1	1	0
Google Play Store	3208ce4f-571c-496d-9c91-f67cb9ee643a	Excellent and safe.	مستور	2023-04-29 14:47:05	نحن سعيدين بمشاركتنا رأيك وتجربتك معنا ونتطلع لرؤيتك مجددا. شكرا لزيارتك.	2023-05-03 07:56:47	0	ar	us		5	ar	excellent safe	Positive	0	0	0
Google Play Store	06b02faa-4b29-4a41-9fd8-9b5346a5fbfb	The customer service is very bad... and the services are even worse... no attention or improvement... the employees always have frowning faces towards the customers... whether you're a gold or wooden customer.	Ms Alkenani	2023-04-28 21:07:16	نعتذر للمشكلة التي واجهتك ونشكر لك ملاحظاتك لمساعدتك يرجى مشاركتنا تفاصيل المشكلة التي واجهتك عبر الرابط https://anb.tw/3Vpq1cv شكرا لزيارتك.	2023-05-11 04:14:19	2	ar	us		1	ar	customer service bad service even bad attention improvement employees always frown face towards customers whether youre gold wooden customer	Negative	1	0	0
Google Play Store	e883925e-9b5e-4507-9c29-5753ba5bb862	I have a problem updating the application after updating the residency. Please advise.	ASiM AlTAHER	2023-04-27 18:33:46	نعتذر للمشكلة التي واجهتك ونشكر لك ملاحظاتك لمساعدتك يرجى مشاركتنا تفاصيل المشكلة التي واجهتك عبر الرابط https://anb.tw/3Vpq1cv شكرا لزيارتك.	2023-04-30 06:57:58	0	ar	us		3	ar	problem update application update residency please advise	Negative	0	1	0
Google Play Store	68da8cf5-4f25-49a6-8d5c-ecf1d8051c1a	MashaAllah, the closest exit is to contact Al-Arabi's phone. The problem is with you, you should fix the application, you have a lot of money.	AHMED A F ALWAHIBI	2023-04-27 10:52:09	نعتذر للمشكلة التي واجهتك ونشكر لك ملاحظاتك لمساعدتك يرجى مشاركتنا تفاصيل المشكلة التي واجهتك عبر الرابط https://anb.tw/3Vpq1cv شكرا لزيارتك.	2023-04-30 06:57:12	0	ar	us		1	ar	mashaallah close exit contact alarabis phone problem fix application lot money	Negative	0	1	0
Google Play Store	cf47933e-0f8d-40df-aa81-44dde4b0d7aa	The application has been locked for 6 days. I deleted it, downloaded it again, and logged in from another mobile device and logged in through Google, but I still encountered the same problem. I keep getting a fixed blue screen. I thought the problem would be solved, but it's taking too long. What is the solution???	غازي ابوشال	2023-04-27 04:09:42	نعتذر للمشكلة التي واجهتك ونشكر لك ملاحظاتك لمساعدتك يرجى مشاركتنا تفاصيل المشكلة التي واجهتك عبر الرابط https://anb.tw/3Vpq1cv شكرا لزيارتك.	2023-04-30 06:56:08	0	ar	us		1	ar	application lock days delete download log another mobile device log google still encounter problem keep get fix blue screen think problem would solve take long solution	Negative	0	1	0
Google Play Store	1d932ab6-7415-4109-b1ca-b94472a36eb5	Not good at all, the application is slow and no employee has helped me.	محمد الشهري	2023-04-27 02:43:37	نعتذر للمشكلة التي واجهتك ونشكر لك ملاحظاتك لمساعدتك يرجى مشاركتنا تفاصيل المشكلة التي واجهتك عبر الرابط https://anb.tw/3Vpq1cv شكرا لزيارتك.	2023-04-30 06:56:00	0	ar	us		5	ar	good application slow employee help	Negative	1	0	1
Google Play Store	3781e085-1cc3-4011-81b4-0fbce51f7b68	Special	محمد مغفوري	2023-04-26 14:25:01	نحن سعيدين بمشاركتنا رأيك وتجربتك معنا ونتطلع لرؤيتك مجددا. شكرا لزيارتك.	2023-04-30 06:54:10	0	ar	us		5	ar	special	Neutral	0	0	0
Google Play Store	02f558fd-3923-4d1c-b91c-5a0656132f47	Every time I enter my login information, it says wait for a call from the service provider, but no call comes.	Hamdy Elzayat	2023-04-26 08:32:32	نعتذر للمشكلة التي واجهتك ونشكر لك ملاحظاتك لمساعدتك يرجى مشاركتنا تفاصيل المشكلة التي واجهتك عبر الرابط https://anb.tw/3Vpq1cv شكرا لزيارتك.	2023-04-30 06:53:56	0	ar	us		1	ar	every time enter login information say wait call service provider call come	Negative	0	1	0
Google Play Store	571966f6-193a-46e7-8d03-e33936ce494f	I cannot update the expiry date of the identity.	احمد الهادي	2023-04-26 04:27:48	نعتذر للمشكلة التي واجهتك ونشكر لك ملاحظاتك لمساعدتك يرجى مشاركتنا تفاصيل المشكلة التي واجهتك عبر الرابط https://anb.tw/3Vpq1cv شكرا لزيارتك.	2023-04-30 06:53:49	0	ar	us		1	ar	update expiry date identity	Negative	0	1	0
Google Play Store	38647c61-12fe-45e8-8527-0b3d23ddfdb2	The application crashed, so I downloaded it again, but the login is not working and a blue screen appears. I can't access my account.	Mahmoud Fahmy	2023-04-25 21:28:43	نعتذر للمشكلة التي واجهتك ونشكر لك ملاحظاتك لمساعدتك يرجى مشاركتنا تفاصيل المشكلة التي واجهتك عبر الرابط https://anb.tw/3Vpq1cv شكرا لزيارتك.	2023-04-30 06:53:00	0	ar	us		1	ar	application crash download login work blue screen appear cant access account	Negative	0	1	0
Google Play Store	5f293cbb-041d-4ea2-a6b6-a7264d519ac3	The application has not been working for 10 days. I have deleted and downloaded it several times, but until today, factory resetting the device did not help. Is the problem because the device is old, Samsung 51?	عبد	2023-04-25 19:22:09	نعتذر للمشكلة التي واجهتك ونشكر لك ملاحظاتك لمساعدتك يرجى الاتصال بنا على 8001244040 او يمكنك مراسلتنا على حسابنا في تويتر @anb_care شكرا لك.	2023-04-27 08:50:37	4	ar	us		1	ar	application work days delete download several time today factory reset device help problem device old samsung	Negative	0	1	0
Google Play Store	037cd229-43ae-4715-a91c-e091760fb623	The worst response I received made me very upset. I sent her a transfer four days ago and it hasn't arrived yet!!!!	Shima Atia	2023-04-25 08:03:16	نعتذر للمشكلة التي واجهتك ونشكر لك ملاحظاتك لمساعدتك يرجى الاتصال بنا على 8001244040 او يمكنك مراسلتنا على حسابنا في تويتر @anb_care شكرا لك	2023-04-27 08:49:12	0	ar	us		1	ar	bad response receive make upset send transfer four days ago hasnt arrive yet	Negative	1	1	0
Google Play Store	742be04c-33af-47d5-9d42-c203a3ae7105	The application is very bad, it does not open.	Msm Gr	2023-04-24 23:51:21	نعتذر للمشكلة التي واجهتك ونشكر لك ملاحظاتك لمساعدتك يرجى الاتصال بنا على 8001244040 او يمكنك مراسلتنا على حسابنا في تويتر @anb_care شكرا لك	2023-04-27 08:49:04	0	ar	us		1	ar	application bad open	Negative	1	1	0
Google Play Store	aac2d12b-0add-4b06-a74e-06d41dd74f87	The application does not open, I don't know what the problem is.	امولة فؤاد يغمور	2023-04-23 05:06:54	نعتذر للمشكلة التي واجهتك ونشكر لك ملاحظاتك لمساعدتك يرجى الاتصال بنا على 8001244040 او يمكنك مراسلتنا على حسابنا في تويتر @anb_care شكرا لك.	2023-04-27 08:44:19	0	ar	us		1	ar	application open dont know problem	Negative	0	1	0
Google Play Store	4afd0070-6239-4d24-9e1a-8e5409d2154c	There is a problem with the fast login every time I try to log in but I cannot access. A message appears indicating that I am not registered. And when I try to register, a message appears stating that the application is registered on another device.	b alshaqer	2023-04-22 07:39:59	نعتذر للمشكلة التي واجهتك ونشكر لك ملاحظاتك لمساعدتك يرجى الاتصال بنا على 8001244040 او يمكنك مراسلتنا على حسابنا في تويتر @anb_care شكرا لك.	2023-04-26 07:33:34	16	ar	us		1	ar	problem fast login every time try log access message appear indicate register try register message appear state application register another device	Negative	0	1	0
Google Play Store	e4ac3ef3-1cc1-409a-84ba-1774193d0bad	After listening to a podcast about the bank and its development, I tried to open an account and transfer my salary to it. I got stuck at the communication information, a promising start 🤣. After opening the account and receiving the card, I tried to open the application, but it got stuck. Now, if I try to close the account, it gets stuck and they hassle me about it.	Abdulkarim Als	2023-04-21 15:08:20	نعتذر للمشكلة التي واجهتك ونشكر لك ملاحظاتك لمساعدتك يرجى الاتصال بنا على 8001244040 او يمكنك مراسلتنا على حسابنا في تويتر @anb_care شكرا لك.	2023-04-26 07:32:57	2	ar	us		1	ar	listen podcast bank development try open account transfer salary get stick communication information promise start open account receive card try open application get stick try close account get stick hassle	Neutral	0	1	1
Google Play Store	32e144bf-1e2c-4be3-90f1-c389d8af1374	He is asking me for the ATM card number and the PIN number.	A M	2023-04-19 22:15:54	نعتذر للمشكلة التي واجهتك ونشكر لك ملاحظاتك لمساعدتك يرجى الاتصال بنا على 8001244040 او يمكنك مراسلتنا على حسابنا في تويتر @anb_care شكرا لك.	2023-04-26 07:26:57	0	ar	us		1	ar	ask atm card number pin number	Neutral	0	1	0
Google Play Store	ed312ca9-66b3-4b95-b7c9-4e521b461a1d	The application is bad. I want to transfer, but there is no option to add a beneficiary.	بندر بن هادي	2023-04-19 10:39:07	نعتذر للمشكلة التي واجهتك ونشكر لك ملاحظاتك لمساعدتك يرجى الاتصال بنا على 8001244040 او يمكنك مراسلتنا على حسابنا في تويتر @anb_care شكرا لك.	2023-04-26 07:25:44	0	ar	us		1	ar	application bad want transfer option add beneficiary	Negative	1	1	0
Google Play Store	22412012-bba1-4ab9-8c34-6146e28b5b56	Excellent and distinctive.	عبدالعزيز الغامدي (ابو سامي)	2023-04-18 14:12:11	نحن سعيدين بمشاركتنا رأيك وتجربتك معنا. شكرا لك	2023-04-26 07:23:37	0	ar	us		5	ar	excellent distinctive	Positive	0	0	0
Google Play Store	7f30b26d-2814-4e9a-a83b-adce1026782b	It offers brief details about credit cards and there are no diverse options and smooth card options. It is a useful application for bank transfers and knowing your balance only, unfortunately.	ali alasmari	2023-04-18 11:25:36	نعتذر للمشكلة التي واجهتك ونشكر لك ملاحظاتك لمساعدتك يرجى الاتصال بنا على 8001244040 او يمكنك مراسلتنا على حسابنا في تويتر @anb_care شكرا لك.	2023-04-26 07:22:55	0	ar	us		1	ar	offer brief detail credit card diverse options smooth card options useful application bank transfer know balance unfortunately	Negative	1	0	0
Google Play Store	b4d960b7-0e1e-42cc-8375-9b411219fb6b	It lacks many services.	Marwa Alsakran	2023-04-17 09:02:37	نعتذر للمشكلة التي واجهتك ونشكر لك ملاحظاتك لمساعدتك يرجى الاتصال بنا على 8001244040 او يمكنك مراسلتنا على حسابنا في تويتر @anb_care	2023-04-26 07:21:01	0	ar	us		1	ar	lack many service	Negative	0	1	0
Google Play Store	652acd81-e410-4361-b110-53981918ef87	There is no option to add a beneficiary, and I deleted it and brought it back, but it still does not appear to me. What is the reason? I hope you can solve this problem or release a new update for it. 😔👍🏾	Amal Ali 39	2023-04-17 01:22:08	نعتذر للمشكلة التي واجهتك ونشكر لك ملاحظاتك لمساعدتك يرجى الاتصال بنا على 8001244040 او يمكنك مراسلتنا على حسابنا في تويتر @anb_care	2023-04-26 07:19:02	0	ar	us		1	ar	option add beneficiary delete bring back still appear reason hope solve problem release new update	Negative	0	1	0
Google Play Store	98392536-492c-49cc-8fef-8b9b69a0a35f	I want to see an update for the application, and if you exit the application, it shouldn't log you out, you have to delete the page.	ابو محمد	2023-04-13 11:08:16	نعتذر للمشكلة التي واجهتك ونشكر لك ملاحظاتك لمساعدتك يرجى الاتصال بنا على 8001244040 او يمكنك مراسلتنا على حسابنا في تويتر @anb_care	2023-04-26 07:15:18	1	ar	us		1	ar	want see update application exit application shouldnt log delete page	Negative	0	1	0
Google Play Store	f0dbaf78-6173-4633-8d85-29e48ba0d382	Not useful and very bad. It is not possible to create a new account and the desired information to register does not appear.	ALMOEZ Mohammed	2023-04-12 21:37:52	نعتذر للمشكلة التي واجهتك ونشكر لك ملاحظاتك لمساعدتك يرجى الاتصال بنا على 8001244040 او يمكنك مراسلتنا على حسابنا في تويتر @anb_care	2023-04-26 07:13:53	0	ar	us		1	ar	useful bad possible create new account desire information register appear	Negative	1	1	0
Google Play Store	dceca52a-455b-4a1a-bb1b-2a4c1292c1c5	I can't add a beneficiary since there is no option to add a beneficiary.	م	2023-04-12 19:49:35	نعتذر للمشكلة التي واجهتك ونشكر لك ملاحظاتك لمساعدتك يرجى الاتصال بنا على 8001244040 او يمكنك مراسلتنا على حسابنا في تويتر @anb_care	2023-04-26 07:13:05	0	ar	us		1	ar	cant add beneficiary since option add beneficiary	Negative	0	1	0
Google Play Store	f103e083-ba2d-4b94-b34f-1f4ea81151e5	May you remain in good health and safety. The investment account has not been transferred to the current account from the private portfolio. Thank you, and please stamp today's date on this.	عبدالله آل مبارك الجهمي	2023-04-11 20:11:39	نعتذر للمشكلة التي واجهتك ونشكر لك ملاحظاتك لمساعدتك يرجى الاتصال بنا على 8001244040 او يمكنك مراسلتنا على حسابنا في تويتر @anb_care شكرا لك.	2023-04-26 07:09:56	0	ar	us		4	ar	may remain good health safety investment account transfer current account private portfolio thank please stamp todays date	Neutral	1	1	0
Google Play Store	115939ad-e1ba-43f5-982c-8cb41bbaf324	When entering the transfers icon, I did not find the option to add a beneficiary!! I don't know why!! We need a solution, may Allah guide everyone to goodness.	Mohammed Al-Qahtani	2023-04-08 21:10:27	نعتذر للمشكلة التي واجهتك ونشكر لك ملاحظاتك لمساعدتك يرجى مشاركتنا تفاصيل المشكلة التي واجهتك عبر الرابط https://anb.tw/3Vpq1cv شكرا لزيارتك.	2023-05-11 04:15:57	0	ar	us		1	ar	enter transfer icon find option add beneficiary dont know need solution may allah guide everyone goodness	Negative	1	1	0
Google Play Store	91fbcc2a-b1b6-4691-99bb-dacb2ffc2f6f	Failed bank. Very complicated!!	بلجيك ss	2023-04-07 17:29:15	نعتذر للمشكلة التي واجهتك ونشكر لك ملاحظاتك لمساعدتك يرجى مشاركتنا تفاصيل المشكلة التي واجهتك عبر الرابط https://anb.tw/3Vpq1cv شكرا لزيارتك.	2023-05-11 04:16:15	0	ar	us		1	ar	fail bank complicate	Negative	1	0	0
Google Play Store	1b266e30-ef48-4522-b86b-b26c668d52b5	It became clear to me that the reason for the non-functioning of the mobile application is not as you mentioned in a previous comment. Thank you very much to the working team. (It is currently not working, we hope for a quick solution to the problem).	Fwozy Hade	2023-04-03 03:35:25	نحن سعيدين بمشاركتنا رأيك وتجربتك معنا. شكرا لك	2023-04-05 11:29:26	3	ar	us		5	ar	become clear reason nonfunctioning mobile application mention previous comment thank much work team currently work hope quick solution problem	Negative	0	1	0
Google Play Store	81fc0547-9553-4bcd-8c77-b3af5152208a	After patience and reliance on Allah, I was able, through this unique application, to pay my internet bills. Thanks be to Allah and a thousand thanks to the developer of the program. I bear witness that knowledge is a beautiful thing. This is a favor from Allah, may He increase you in knowledge. May you fear Him, the developer of the program. My gratitude to you and your noble heart.	F16_Trk Shm	2023-04-03 00:00:03	نحن سعيدين بمشاركتنا رأيك وتجربتك معنا. شكرا لك	2023-04-05 11:28:41	0	ar	us		5	ar	patience reliance allah able unique application pay internet bill thank allah thousand thank developer program bear witness knowledge beautiful thing favor allah may increase knowledge may fear developer program gratitude noble heart	Positive	1	0	0
Google Play Store	ec947e91-e604-419f-9ab5-cca4fe3a9575	How do I secure my device? It tells me you have exceeded the maximum limit for devices.	سبحان الله	2023-03-31 08:08:48	نعتذر للمشكلة التي واجهتك ونشكر لك ملاحظاتك لمساعدتك يرجى مشاركتنا تفاصيل المشكلة التي واجهتك عبر الرابط https://anb.tw/3Vpq1cv شكرا لزيارتك.	2023-04-03 06:20:17	0	ar	us		5	ar	secure device tell exceed maximum limit devices	Negative	0	0	0
Google Play Store	b6666719-e841-4f4e-a532-a8da8e0e54f8	There is a problem with the application. I was logged in through the Arabic Mobile, and when the mobile was factory reset, every time I tried to log into the application, it says that I have exceeded the maximum number of registered devices and I cannot log into the Arabic Mobile. Please solve the problem.	Ahmed Ahmed	2023-03-31 03:28:34	نعتذر للمشكلة التي واجهتك ونشكر لك ملاحظاتك لمساعدتك يرجى مشاركتنا تفاصيل المشكلة التي واجهتك عبر الرابط https://anb.tw/3Vpq1cv شكرا لزيارتك.	2023-04-03 06:20:04	2	ar	us		1	ar	problem application log arabic mobile mobile factory reset every time try log application say exceed maximum number register devices log arabic mobile please solve problem	Negative	0	1	0
Google Play Store	a96f7691-ba9f-4079-bd68-c2088af094d7	Why is the application not working?	Ror Sch	2023-03-30 21:13:59	نعتذر للمشكلة التي واجهتك ونشكر لك ملاحظاتك لمساعدتك يرجى مشاركتنا تفاصيل المشكلة التي واجهتك عبر الرابط https://anb.tw/3Vpq1cv شكرا لزيارتك.	2023-04-03 06:19:54	0	ar	us		1	ar	application work	Negative	0	1	0
Google Play Store	122673a8-2f6b-4f6b-9863-a3109ff3a835	The problem has been fixed. Thank you.	القايدي الحربي	2023-03-30 13:48:17	نحن سعيدين بمشاركتنا رأيك وتجربتك معنا ونتطلع لرؤيتك مجددا. شكرا لزيارتك.	2023-04-03 06:19:00	0	ar	us		5	ar	problem fix thank	Positive	0	1	0
Google Play Store	ac25efdd-6390-4347-8c58-6c601736ba69	I cannot add any beneficiary through the application or online?	Abd Alrhman	2023-03-29 19:02:15	نعتذر للمشكلة التي واجهتك ونشكر لك ملاحظاتك لمساعدتك يرجى مشاركتنا تفاصيل المشكلة التي واجهتك عبر الرابط https://anb.tw/3Vpq1cv شكرا لزيارتك.	2023-04-03 06:18:36	0	ar	us		1	ar	add beneficiary application online	Neutral	0	1	0
Google Play Store	c1a00c2e-1d3c-4e89-9880-4784238936be	Belonging to the Arab Bank gives you more.	ابراهيم	2023-03-29 13:52:08	نحن سعيدين بمشاركتنا رأيك وتجربتك معنا. شكرا لك	2023-04-02 10:52:19	0	ar	us		5	ar	belong arab bank give	Neutral	1	0	0
Google Play Store	3af2512f-570e-4bc3-b849-cbd69efd2eae	MashaAllah, the application is improving. Thank you for your efforts, and always striving for the best.	تهاني الجهني	2023-03-27 03:02:20	نحن سعيدين بمشاركتنا رأيك وتجربتك معنا. شكرا لك	2023-04-02 10:59:42	0	ar	us		5	ar	mashaallah application improve thank efforts always strive best	Positive	1	0	0
Google Play Store	b53d5ae2-f0cd-47b7-8fda-63d81e10e14a	Excellent and wonderful.	ابو مشعل	2023-03-27 00:39:40	نحن سعيدين بمشاركتنا رأيك وتجربتك معنا. شكرا لك	2023-04-02 10:59:52	0	ar	us		5	ar	excellent wonderful	Positive	0	0	0
Google Play Store	009a94b9-7733-4ea2-89e2-2fecabda4ded	Is the app working now? Every time I open it, it disappears from the screen.	أبو رهف	2023-03-26 06:48:47	نعتذر للمشكلة التي واجهتك ونشكر لك ملاحظاتك لمساعدتك يرجى مشاركتنا تفاصيل المشكلة التي واجهتك عبر الرابط https://anb.tw/3Vpq1cv شكرا لزيارتك.	2023-03-30 08:40:40	0	ar	us		1	ar	app work every time open disappear screen	Negative	0	1	0
Google Play Store	a5d7a737-3719-4f93-97d8-ef8aa12b6e8e	The worst bank in Saudi Arabia, by God, you don't even reach a quarter of the standards of other banks. With such an application and your dealings, I do not advise anyone to open an account with you. If you want, go and find another bank, far away from it.	ماجد العبدالله	2023-03-26 00:22:33	نعتذر للمشكلة التي واجهتك ونشكر لك ملاحظاتك لمساعدتك يرجى مشاركتنا تفاصيل المشكلة التي واجهتك عبر الرابط https://anb.tw/3Vpq1cv شكرا لزيارتك.	2023-03-30 08:41:02	0	ar	us		1	ar	bad bank saudi arabia god dont even reach quarter standards bank application dealings advise anyone open account want go find another bank far away	Negative	1	0	0
Google Play Store	4e10a9a3-a0b3-4857-9830-2efa50858a71	I receive a message saying "Quick login is displayed, but it does not want to log into the program."	Walid Allol	2023-03-25 23:59:13	نعتذر للمشكلة التي واجهتك ونشكر لك ملاحظاتك لمساعدتك يرجى مشاركتنا تفاصيل المشكلة التي واجهتك عبر الرابط https://anb.tw/3Vpq1cv شكرا لزيارتك.	2023-03-30 08:41:13	0	ar	us		3	ar	receive message say quick login display want log program	Negative	0	1	0
Google Play Store	98eadd0d-c54b-455a-9bc3-1d4d57fbe9ae	The application is bad after the update, every time I enter it, it says it needs an update. I click here and press without updating, but it doesn't open.	Abumajid Alkenani	2023-03-25 23:44:48	نعتذر للمشكلة التي واجهتك ونشكر لك ملاحظاتك لمساعدتك يرجى مشاركتنا تفاصيل المشكلة التي واجهتك عبر الرابط https://anb.tw/3Vpq1cv شكرا لزيارتك.	2023-03-30 08:34:48	0	ar	us		1	ar	application bad update every time enter say need update click press without update doesnt open	Negative	1	1	0
Google Play Store	f5185b46-915e-43bc-a17c-ac45d32f2312	After the update, the program is very bad and now it refuses to log me into my account. It says that I must update the program even though the program is already updated to the latest version. I suggest reverting back to the old version, as it was much better.	ابو مـحمـــد	2023-03-25 23:44:16	نعتذر للمشكلة التي واجهتك ونشكر لك ملاحظاتك لمساعدتك يرجى مشاركتنا تفاصيل المشكلة التي واجهتك عبر الرابط https://anb.tw/3Vpq1cv شكرا لزيارتك.	2023-03-30 08:34:57	0	ar	us		1	ar	update program bad refuse log account say must update program even though program already update late version suggest revert back old version much good	Negative	0	1	0
Google Play Store	e6b0f9d0-7d81-4a50-bf5e-4cb4bb04a43a	Very excellent	rashedalheji Alheji	2023-03-25 23:41:16	نحن سعيدين بمشاركتنا رأيك وتجربتك معنا ونتطلع لرؤيتك مجددا. شكرا لزيارتك.	2023-03-30 08:35:35	0	ar	us		5	ar	excellent	Positive	0	0	0
Google Play Store	f465736e-4c81-457d-8150-502f7ceb6896	Very good 👍🙂😀 Thank you ✋️	Ahmed	2023-03-25 23:35:09	نحن سعيدين بمشاركتنا رأيك وتجربتك معنا ونتطلع لرؤيتك مجددا. شكرا لزيارتك.	2023-03-30 08:36:18	0	ar	us		5	ar	good thank	Positive	0	0	0
Google Play Store	56d7d3ac-7941-43ac-80aa-bdd254abe53f	After the new update, it gives me that it needs an update and I just started using it, I hope you can solve the problem.	صبا الحربي	2023-03-25 23:31:02	نعتذر للمشكلة التي واجهتك ونشكر لك ملاحظاتك لمساعدتك يرجى مشاركتنا تفاصيل المشكلة التي واجهتك عبر الرابط https://anb.tw/3Vpq1cv شكرا لزيارتك.	2023-03-30 08:36:43	0	ar	us		2	ar	new update give need update start use hope solve problem	Negative	0	1	0
Google Play Store	28650c7a-80db-444a-a2d6-e9fdbb88b867	Service speed	Dosah Makki	2023-03-25 23:30:33	نحن سعيدين بمشاركتنا رأيك وتجربتك معنا ونتطلع لرؤيتك مجددا. شكرا لزيارتك.	2023-03-30 08:37:02	0	ar	us		5	ar	service speed	Neutral	0	0	0
Google Play Store	681de701-b1e8-481a-aa22-dada25796fc0	Beautiful step	الذوق الرفيع	2023-03-25 23:21:14	شكرا لك سوف يتم اخذ ملاحظتك بعين الاعتبار ، نتطلع لرؤيتك مجددا. شكرا لزيارتك.	2023-03-30 08:32:12	0	ar	us		4	ar	beautiful step	Positive	0	0	0
Google Play Store	4779f881-a65b-4ff1-a81b-aaf898bd2660	The application is asking me to update the application, while there is no new update available for the application. However, even after I deleted the application and downloaded it again as a new version, the same issue of "application update" persists. Where is the problem and how can it be fixed?	HASHIM '	2023-03-25 23:04:04	نعتذر للمشكلة التي واجهتك ونشكر لك ملاحظاتك لمساعدتك يرجى مشاركتنا تفاصيل المشكلة التي واجهتك عبر الرابط https://anb.tw/3Vpq1cv شكرا لزيارتك.	2023-03-30 08:32:43	0	ar	us		1	ar	application ask update application new update available application however even delete application download new version issue application update persist problem fix	Negative	0	1	0
Google Play Store	94b6e023-0171-4d07-bf64-4c3ac4adbe93	Memtar application... serves the customers.	فيصل فيصل	2023-03-25 22:56:25	نحن سعيدين بمشاركتنا رأيك وتجربتك معنا ونتطلع لرؤيتك مجددا. شكرا لزيارتك.	2023-03-30 08:33:16	0	ar	us		4	ar	memtar application serve customers	Neutral	0	1	0
Google Play Store	e1816c30-84b8-4eb1-9e40-13a75c6972eb	The application is bad, it's hanging. Please fix the glitch.	أبو فيصل	2023-03-25 22:41:01	نعتذر للمشكلة التي واجهتك ونشكر لك ملاحظاتك لمساعدتك يرجى مشاركتنا تفاصيل المشكلة التي واجهتك عبر الرابط https://anb.tw/3Vpq1cv شكرا لزيارتك.	2023-03-30 08:33:41	0	ar	us		1	ar	application bad hang please fix glitch	Negative	1	0	1
Google Play Store	c4475d0e-e3fd-4435-a5a1-61cebda04436	Very, very, very bad after the update. I can't enter, it just sits and spins for a minute, then says the connection time is over. The worst banking application, I swear. Where are you and where is Al Rajhi, your predecessor by a hundred light-years.	جريح الجنوب	2023-03-25 21:23:13	نعتذر للمشكلة التي واجهتك ونشكر لك ملاحظاتك لمساعدتك يرجى مشاركتنا تفاصيل المشكلة التي واجهتك عبر الرابط https://anb.tw/3Vpq1cv شكرا لزيارتك.	2023-03-30 08:27:23	0	ar	us		1	ar	bad update cant enter sit spin minute say connection time bad bank application swear al rajhi predecessor hundred lightyears	Negative	1	1	1
Google Play Store	8d6f45eb-8b41-4187-b2a8-dc703d123d0e	The application is terrible. The previous application was better than the current one. The bank, in general, is declining and they froze the account because of not updating it. They are asking for the update through the application, which is very poor. Why can't the update be done through the website? With banks like Alinma and Al Bilad, this bank will soon be phased out. "The backward ones have …	Saud &	2023-03-24 20:19:22	نعتذر للمشكلة التي واجهتك ونشكر لك ملاحظاتك لمساعدتك يرجى مشاركتنا تفاصيل المشكلة التي واجهتك عبر الرابط https://anb.tw/3Vpq1cv شكرا لزيارتك.	2023-03-30 08:27:58	0	ar	us		1	ar	application terrible previous application good current one bank general decline freeze account update ask update application poor cant update do website bank like alinma al bilad bank soon phase backward ones become extinct	Negative	1	1	1
Google Play Store	9efa99a1-3255-49bb-88ff-569f8569de16	I returned to Egypt two days ago and the application isn't opening for me. I need an urgent solution to this problem. Thank you.	Islam ashraf	2023-03-22 03:42:46	نعتذر للمشكلة التي واجهتك ونشكر لك ملاحظاتك لمساعدتك يرجى الاتصال بنا على 8001244040 او يمكنك مراسلتنا على حسابنا في تويتر @anb_care شكرا لك.	2023-03-26 08:14:02	0	ar	us		5	ar	return egypt two days ago application isnt open need urgent solution problem thank	Negative	0	1	0
Google Play Store	dd270b4f-2bf0-4578-929f-8b9f659e5f6a	The best and easiest banking application... Thank you for this work.	A ALSULTAN	2023-03-20 06:33:54	نحن سعيدين بمشاركتنا رأيك وتجربتك معنا ونتطلع لرؤيتك مجددا. شكرا لزيارتك.	2023-03-22 06:44:20	1	ar	us		5	ar	best easy bank application thank work	Positive	0	0	0
Google Play Store	7c1514ab-8800-41dd-b0bd-21060ae1845d	the worstand complicated application, I can't use it unless I use the application daily. Today is the third day and it forces you to change the password.	Asmarico ASM	2023-03-20 05:20:25	نعتذر للمشكلة التي واجهتك ونشكر لك ملاحظاتك لمساعدتك يرجى مشاركتنا تفاصيل المشكلة التي واجهتك عبر الرابط https://anb.tw/3Vpq1cv شكرا لزيارتك.	2023-03-22 06:44:02	1	ar	us		1	ar	worstand complicate application cant use unless use application daily today third day force change password	Negative	1	1	0
Google Play Store	2d6bb1b2-6f67-4050-87dc-8912e90e8772	Great and available services	S00s00 1402	2023-03-19 08:04:17	نحن سعيدين بمشاركتنا رأيك وتجربتك معنا ونتطلع لرؤيتك مجددا. شكرا لزيارتك.	2023-03-21 10:19:49	1	ar	us		5	ar	great available service	Positive	0	0	0
Google Play Store	4464cd9b-fa50-446c-85cf-e4e72cbefeb1	There is no service for sharing operations in PDF format or even accessing operations in detail, and this is a major flaw in it.	Jon Albert	2023-03-18 19:35:56	شكرا لك سوف يتم اخذ ملاحظتك بعين الاعتبار ، نتطلع لرؤيتك مجددا. شكرا لزيارتك.	2023-03-21 10:19:27	1	ar	us		3	ar	service share operations pdf format even access operations detail major flaw	Negative	0	1	0
Google Play Store	22ddf685-152f-4e67-a67d-a03f2bcb2524	A prestigious bank	IH IH	2023-03-17 16:42:22	نحن سعيدين بمشاركتنا رأيك وتجربتك معنا ونتطلع لرؤيتك مجددا. شكرا لزيارتك.	2023-03-21 10:18:49	0	ar	us		5	ar	prestigious bank	Positive	0	0	0
Google Play Store	fc66f264-c42e-45ce-b427-ebf3031663df	Excellent, easy, and exceptional services.	ابو طلال	2023-03-17 10:57:29	نحن سعيدين بمشاركتنا رأيك وتجربتك معنا ونتطلع لرؤيتك مجددا. شكرا لزيارتك.	2023-03-21 10:18:21	1	ar	us		5	ar	excellent easy exceptional service	Positive	0	0	0
Google Play Store	9a1caadd-ddda-4c61-adef-dec51e43ca17	Very very wonderful, praise be to God, the Lord of the worlds.	محمد الشافعي (أبو ابراهيم)	2023-03-17 08:05:51	نحن سعيدين بمشاركتنا رأيك وتجربتك معنا ونتطلع لرؤيتك مجددا. شكرا لزيارتك.	2023-03-21 10:17:07	1	ar	us		5	ar	wonderful praise god lord worlds	Positive	0	0	0
Google Play Store	9856bb29-26f8-4e7b-8ce0-23265801392d	Regarding the savings account, why aren't the profits clear as announced, which is 200 riyals for every amount of 6000? Best regards.	3dy Assiry	2023-03-17 07:54:19	شكرا لك سوف يتم اخذ ملاحظتك بعين الاعتبار ، نتطلع لرؤيتك مجددا. شكرا لزيارتك.	2023-03-21 10:16:52	1	ar	us		5	ar	regard savings account arent profit clear announce riyals every amount best regard	Neutral	1	0	0
Google Play Store	e750870d-de4b-4d3d-b90b-f6b1a37282db	The Arabic Mobile application does not have the feature to add a bill or add a beneficiary.	Mohammed Ali	2023-03-16 20:55:00	نعتذر للمشكلة التي واجهتك ونشكر لك ملاحظاتك لمساعدتك يرجى مشاركتنا تفاصيل المشكلة التي واجهتك عبر الرابط https://anb.tw/3Vpq1cv شكرا لزيارتك.	2023-03-21 10:15:15	1	ar	us		1	ar	arabic mobile application feature add bill add beneficiary	Negative	0	1	0
Google Play Store	02718357-d6bb-4835-b4b8-ea5a840901a7	We need to allow entering the sender's code without having to write it again.	خبرات سارة	2023-03-16 16:29:33	شكرا لك سوف يتم اخذ ملاحظتك بعين الاعتبار ، نتطلع لرؤيتك مجددا. شكرا لزيارتك.	2023-03-21 10:12:46	1	ar	us		5	ar	need allow enter senders code without write	Neutral	1	1	0
Google Play Store	1f417e88-2323-4905-868f-8845c75edb4a	I cannot register on the application even though I have completed all the steps.	Hamdi Nino	2023-03-14 10:14:05	نعتذر للمشكلة التي واجهتك ونشكر لك ملاحظاتك لمساعدتك يرجى مشاركتنا تفاصيل المشكلة التي واجهتك عبر الرابط https://anb.tw/3Vpq1cv شكرا لزيارتك.	2023-03-21 10:12:06	2	ar	us		1	ar	register application even though complete step	Neutral	0	1	0
Google Play Store	216a68ac-cd43-415c-a73a-74b1e2f789a8	Very bad and the application does not open. We belong to Allah and to Him we shall return. What is this? And it is still very bad until 2023.	osama abid	2023-03-13 06:24:58	نعتذر للمشكلة التي واجهتك ونشكر لك ملاحظاتك لمساعدتك يرجى مشاركتنا تفاصيل المشكلة التي واجهتك عبر الرابط https://anb.tw/3Vpq1cv شكرا لزيارتك.	2023-03-21 10:11:16	2	ar	us		1	ar	bad application open belong allah shall return still bad	Negative	1	0	0
Google Play Store	b0186005-4579-4090-ace2-c46d80932e93	It is not working and when registering the data, it gives an error message.	Ahmed Zahran	2023-03-13 04:44:41	نعتذر للمشكلة التي واجهتك ونشكر لك ملاحظاتك لمساعدتك يرجى مشاركتنا تفاصيل المشكلة التي واجهتك عبر الرابط https://anb.tw/3Vpq1cv شكرا لزيارتك.	2023-03-21 10:11:05	5	ar	us		1	ar	work register data give error message	Negative	0	1	0
Google Play Store	ee600f9f-a2c4-4bc1-b259-3dea28619c01	"I deleted the program and reinstalled it, but it is not opening."	خدو ابونواس	2023-03-11 13:35:10	نعتذر للمشكلة التي واجهتك ونشكر لك ملاحظاتك لمساعدتك يرجى مشاركتنا تفاصيل المشكلة التي واجهتك عبر الرابط https://anb.tw/3Vpq1cv شكرا لزيارتك.	2023-03-21 10:10:03	1	ar	us		4	ar	delete program reinstall open	Negative	0	1	0
Google Play Store	de696606-da09-4322-b89a-2238aee98572	Complaints regarding fast entry are not being answered, it gets stuck.	محمود الشهاوي Mahmoud Elshahawy	2023-03-11 02:57:55	نعتذر للمشكلة التي واجهتك ونشكر لك ملاحظاتك لمساعدتك يرجى مشاركتنا تفاصيل المشكلة التي واجهتك عبر الرابط https://anb.tw/3Vpq1cv شكرا لزيارتك.	2023-03-21 10:09:52	2	ar	us		1	ar	complaints regard fast entry answer get stick	Negative	0	0	1
Google Play Store	84d028b5-008d-47d3-bcf8-9c5a84b7208f	"He used to work for me, but after the latest update, he is not willing to open. What is the solution? Help us! I uninstalled it and then reinstalled it, but it was of no use."	Badr3 Albadr	2023-03-09 23:20:38	نعتذر للمشكلة التي واجهتك ونشكر لك ملاحظاتك لمساعدتك يرجى مشاركتنا تفاصيل المشكلة التي واجهتك عبر الرابط https://anb.tw/3Vpq1cv شكرا لزيارتك.	2023-03-21 10:09:42	1	ar	us		2	ar	use work late update will open solution help us uninstalled reinstall use	Negative	0	1	0
Google Play Store	f01b2a93-7e47-4659-b945-b453949e3493	Very wonderful	سيسي مذكور	2023-03-07 13:18:51	نحن سعيدين بمشاركتنا رأيك وتجربتك معنا ونتطلع لرؤيتك مجددا. شكرا لزيارتك.	2023-03-22 06:45:23	0	ar	us		5	ar	wonderful	Positive	0	0	0
Google Play Store	b3e576f1-0cb9-446e-aad2-99998944d82d	The application is good but there is a lack of response to the complaints submitted by the customer. Please respond.	Mimmmo Sawi	2023-03-05 08:19:08	نحن سعيدين بمشاركتنا رأيك وتجربتك معنا. شكرا لك	2023-03-09 07:35:34	3	ar	us		5	ar	application good lack response complaints submit customer please respond	Negative	1	1	0
Google Play Store	ca225dcf-8799-4e0c-8a8a-9c86721ab4c5	Very advanced.	Wael Alshawa	2023-03-03 10:05:50	نحن سعيدين بمشاركتنا رأيك وتجربتك معنا. شكرا لك	2023-03-09 07:40:59	0	ar	us		5	ar	advance	Positive	0	1	0
Google Play Store	b2ab7c0d-e5f6-4dbd-ba24-25a05fac9472	"The worst bank on the planet, very very bad. It has fallen completely. The digital reputation, the application doesn't work."	MOHAMMED QASEM	2023-03-03 00:25:45	نعتذر للمشكلة التي واجهتك ونشكر لك ملاحظاتك لمساعدتك يرجى الاتصال بنا على 8001244040 او يمكنك مراسلتنا على حسابنا في تويتر @anb_care شكرا لك.	2023-03-09 07:43:55	3	ar	us		1	ar	bad bank planet bad fall completely digital reputation application doesnt work	Negative	1	1	0
Google Play Store	b641d93c-d67f-45fe-ae42-888b644eb259	Why freeze the account and why not update the ID information? Isn't the ID linked to Absher and updated regularly? I will change to another bank because of this method. Imagine if you were sick and in an emergency, and they freeze your account. The information should be updated automatically. This is an inappropriate method.	hamdan mohd	2023-03-02 23:28:20	نعتذر للمشكلة التي واجهتك ونشكر لك ملاحظاتك لمساعدتك يرجى الاتصال بنا على 8001244040 او يمكنك مراسلتنا على حسابنا في تويتر @anb_care شكرا لك.	2023-03-09 07:45:14	8	ar	us		1	ar	freeze account update id information isnt id link absher update regularly change another bank method imagine sick emergency freeze account information update automatically inappropriate method	Negative	0	1	1
Google Play Store	8d7b4515-fa77-4611-a78d-0fe3b583b888	A wonderful and user-friendly application.	FAISAL MOHAMMED	2023-03-02 08:33:04	نحن سعيدين بمشاركتنا رأيك وتجربتك معنا ونتطلع لرؤيتك مجددا. شكرا لزيارتك.	2023-03-22 06:47:19	2	ar	us		5	ar	wonderful userfriendly application	Positive	1	0	0
Google Play Store	0cfef589-69a7-4951-a8fd-32134178bc91	Tired	Abo Abdalh	2023-02-28 19:10:24	نعتذر للمشكلة التي واجهتك ونشكر لك ملاحظاتك لمساعدتك يرجى الاتصال بنا على 8001244040 او يمكنك مراسلتنا على حسابنا في تويتر @anb_care شكرا لك.	2023-03-09 07:49:31	0	ar	us		1	ar	tire	Neutral	1	0	0
Google Play Store	5061db8a-2465-48c2-bcc2-26bec7d521f8	There is a malfunction in the system... I can't pay any bill, why?	Ahmed Alnaser	2023-02-28 10:41:40	نعتذر للمشكلة التي واجهتك ونشكر لك ملاحظاتك لمساعدتك يرجى الاتصال بنا على 8001244040 او يمكنك مراسلتنا على حسابنا في تويتر @anb_care شكرا لك.	2023-03-09 07:51:16	1	ar	us		5	ar	malfunction system cant pay bill	Negative	0	1	0
Google Play Store	f5d5e57b-06d3-42df-a834-3a6f9c0c4dc8	My information was updated over a month ago and now my account is frozen. What exactly do you freeze in my account? And the way you update your information in the video is different from the application. So, why don't you just tell us from the beginning that you want our presence at your branches instead of confusing us? You have caused the people to suffer from mental decline, may God not bless …	الهائلة العظيمة	2023-02-27 04:31:14	نعتذر للمشكلة التي واجهتك ونشكر لك ملاحظاتك لمساعدتك يرجى الاتصال بنا على 8001244040 او يمكنك مراسلتنا على حسابنا في تويتر @anb_care شكرا لك.	2023-02-28 12:32:50	0	ar	us		1	ar	information update month ago account freeze exactly freeze account way update information video different application dont tell us begin want presence branch instead confuse us cause people suffer mental decline may god bless application ask god show wonder power	Negative	0	1	1
Google Play Store	6b9a466e-001e-4d0a-b61f-e161d9c0554d	Excellent job, may Allah bless you.	نجاة عقيل	2023-02-25 15:22:40	نحن سعيدين بمشاركتنا رأيك وتجربتك معنا. شكرا لك	2023-02-28 12:29:52	0	ar	us		5	ar	excellent job may allah bless	Positive	0	0	0
Google Play Store	4f4978e3-76ff-4a2c-8206-9410beb98c77	You can open an account through the application and use it without having to visit the branch.	ومن يتق الله يجعل له مخرجا	2023-02-25 14:23:46	نحن سعيدين بمشاركتنا رأيك وتجربتك معنا. شكرا لك	2023-02-28 12:29:14	1	ar	us		5	ar	open account application use without visit branch	Neutral	0	1	0
Google Play Store	d7b37111-5f93-460e-beeb-9744d1184abc	How do I make the program dark? What is the name of this complex program?	Ibrahem Suliman	2023-02-24 17:13:01	نعتذر للمشكلة التي واجهتك ونشكر لك ملاحظاتك لمساعدتك يرجى الاتصال بنا على 8001244040 او يمكنك مراسلتنا على حسابنا في تويتر @anb_care شكرا لك.	2023-02-28 12:28:05	0	ar	us		1	ar	make program dark name complex program	Neutral	1	0	0
Google Play Store	b8b4e73b-26d9-475c-8657-5e8361e1f02d	One of the best mobile banking applications, based on a real experience with other banks. Smooth, simple, and practical. I hope it remains with the same design, and if any updates are needed, they should be added only. It deserves more than 5 stars. Greetings and appreciation to everyone 💐.	محمد .5431	2023-02-21 10:30:37	نحن سعيدين بمشاركتنا رأيك وتجربتك معنا. شكرا لك	2023-02-27 08:43:28	134	ar	us		5	ar	one best mobile bank applications base real experience bank smooth simple practical hope remain design update need add deserve star greetings appreciation everyone	Positive	1	0	0
Google Play Store	58dee0df-95a1-4a6e-bead-01d689c5186a	The Arab Bank is excellent in dealing with its members.	محمد العيسي	2023-02-21 04:05:05	نحن سعيدين بمشاركتنا رأيك وتجربتك معنا. شكرا لك	2023-02-27 08:42:39	1	ar	us		5	ar	arab bank excellent deal members	Positive	0	0	0
Google Play Store	1bc47aa8-a2be-4aa0-8abc-89e5ba363d66	The bank's service is excellent.	صالح الزهراني	2023-02-15 17:19:58	نحن سعيدين بمشاركتنا رأيك وتجربتك معنا. شكرا لك	2023-02-19 07:52:10	1	ar	us		5	ar	bank service excellent	Positive	0	0	0
Google Play Store	301d0153-1d42-482e-976a-df3fd34dacbc	I don't know why there is no option to transfer, it's like I have opened an account without any privileges. When I try to transfer to another account, it asks for his card number or phone number. This account has been frozen since the first day I used the card.	abo feras	2023-02-13 09:40:40	نعتذر للمشكلة التي واجهتك ونشكر لك ملاحظاتك لمساعدتك يرجى مشاركتنا تفاصيل المشكلة التي واجهتك عبر الرابط https://anb.tw/3Vpq1cv شكرا لزيارتك.	2023-08-13 05:36:00	2	ar	us		5	ar	dont know option transfer like open account without privilege try transfer another account ask card number phone number account freeze since first day use card	Negative	0	1	1
Google Play Store	3502bb0d-460e-41e6-8a20-46409ac65f7e	The worst bank application.	luffy MGS	2023-02-12 19:52:32	نعتذر للمشكلة التي واجهتك ونشكر لك ملاحظاتك لمساعدتك يرجى الاتصال بنا على 8001244040 او يمكنك مراسلتنا على حسابنا في تويتر @anb_care شكرا لك.	2023-02-19 07:57:07	1	ar	us		1	ar	bad bank application	Negative	1	0	0
Google Play Store	c9a4b533-1b8b-4a1e-b04b-f3d88bb245ff	How can I display my Mada card on my mobile when purchasing any item from any store? This feature is not available.	حسن القارون	2023-02-11 23:22:18	نعتذر للمشكلة التي واجهتك ونشكر لك ملاحظاتك لمساعدتك يرجى الاتصال بنا على 8001244040 او يمكنك مراسلتنا على حسابنا في تويتر @anb_care شكرا لك	2023-02-16 09:36:53	2	ar	us		3	ar	display mada card mobile purchase item store feature available	Negative	0	1	0
Google Play Store	a131c206-6640-4efc-bccd-2774407e3ae2	SMS messages do not arrive! The second thing is, when I transfer to a money account, his name should appear for me to feel reassured, like the Al Rajhi Bank application.	ام سعيد	2023-02-10 13:52:29	نعتذر للمشكلة التي واجهتك ونشكر لك ملاحظاتك لمساعدتك يرجى الاتصال بنا على 8001244040 او يمكنك مراسلتنا على حسابنا في تويتر @anb_care شكرا لك	2023-02-16 08:04:51	2	ar	us		1	ar	sms message arrive second thing transfer money account name appear feel reassure like al rajhi bank application	Neutral	0	1	0
Google Play Store	f48326bb-1767-49a3-9aa8-220a066ea031	Beautiful and easy	احمد فرج	2023-02-10 08:49:36	نحن سعيدين بمشاركتنا رأيك وتجربتك معنا ونتطلع لرؤيتك مجددا. شكرا لزيارتك.	2023-03-22 06:49:29	0	ar	us		5	ar	beautiful easy	Positive	0	0	0
Google Play Store	2cc3c0f3-4b32-422c-bb8e-484835e26761	Excellent, deserves ten stars. Well done to all of you.	Ahmed Asiri	2023-02-09 09:34:41	نحن سعيدين بمشاركتنا رأيك وتجربتك معنا. شكرا لك	2023-02-13 08:28:03	2	ar	us		5	ar	excellent deserve ten star well do	Positive	0	0	0
Google Play Store	f78662c4-b77c-4f88-859e-1c293bf528bd	Very bad service.	mohamed amin	2023-02-08 20:56:02	نعتذر للمشكلة التي واجهتك ونشكر لك ملاحظاتك لمساعدتك يرجى مشاركتنا تفاصيل المشكلة التي واجهتك عبر الرابط https://anb.tw/3Vpq1cv او يمكنك مراسلتنا على حسابنا في تويتر @anb_care شكرا لك.	2023-02-13 08:27:23	0	ar	us		1	ar	bad service	Negative	1	0	0
Google Play Store	46153356-ef75-4f4c-bc61-0b79d8326b64	Very excellent 👍👍👍👍👍 When selecting transfers, the option to add a beneficiary does not appear. Please solve the problem.	A abadi	2023-02-08 10:05:51	نعتذر للمشكلة التي واجهتك ونشكر لك ملاحظاتك لمساعدتك يرجى مشاركتنا تفاصيل المشكلة التي واجهتك عبر الرابط https://anb.tw/3Vpq1cv او يمكنك مراسلتنا على حسابنا في تويتر @anb_care	2023-02-13 08:25:58	3	ar	us		5	ar	excellent select transfer option add beneficiary appear please solve problem	Positive	1	1	0
Google Play Store	336162f0-1813-42ca-b2f4-f2e4ac314cb8	This bank is stupid and will remain stupid forever.	Yahia	2023-02-05 18:27:21	نعتذر للمشكلة التي واجهتك ونشكر لك ملاحظاتك لمساعدتك يرجى مشاركتنا تفاصيل المشكلة التي واجهتك عبر الرابط https://anb.tw/3Vpq1cv او يمكنك مراسلتنا على حسابنا في تويتر @anb_care شكرا لك.	2023-02-13 08:17:31	0	ar	us		1	ar	bank stupid remain stupid forever	Negative	1	0	0
Google Play Store	848a4dd9-25ad-454e-84f5-560210a9e0ac	The app is not working.	عبدالعزيز الفهد	2023-02-01 22:00:53	نعتذر للمشكلة التي واجهتك ونشكر لك ملاحظاتك لمساعدتك يرجى مشاركتنا تفاصيل المشكلة التي واجهتك عبر الرابط https://anb.tw/3Vpq1cv او يمكنك مراسلتنا على حسابنا في تويتر @anb_care شكرا لك.	2023-02-13 08:00:12	0	ar	us		1	ar	app work	Negative	0	1	0
Google Play Store	59e5d4aa-6ffc-4096-bf9c-2fcdbbd27e37	The problem I have is that it does not open; it says "please log out from other devices." I used to have a device but it was broken, so I bought a new one and it still says "you have exceeded the allowed number of devices." Please find a solution for us, may God be pleased with you; even the bank employee couldn't solve the problem.	ابو رايد	2023-02-01 08:00:22	نعتذر للمشكلة التي واجهتك ونشكر لك ملاحظاتك لمساعدتك يرجى مشاركتنا تفاصيل المشكلة التي واجهتك عبر الرابط https://anb.tw/3Vpq1cv او يمكنك مراسلتنا على حسابنا في تويتر @anb_care شكرا لك	2023-02-13 07:53:03	1	ar	us		5	ar	problem open say please log devices use device break buy new one still say exceed allow number devices please find solution us may god please even bank employee couldnt solve problem	Negative	0	1	0
Google Play Store	d1a1c623-4f81-4e23-8845-14cbc8bba905	I received a text message stating that it is possible to update the expiration date of the national ID through the application. However, when doing so, an error message repeatedly appears stating that this operation cannot be performed at the moment. Please fix this issue.	M A	2023-01-31 13:10:08	نعتذر للمشكلة التي واجهتك ونشكر لك ملاحظاتك لمساعدتك يرجى مشاركتنا تفاصيل المشكلة التي واجهتك عبر الرابط https://anb.tw/3Vpq1cv او يمكنك مراسلتنا على حسابنا في تويتر @anb_care شكرا لك.	2023-02-13 07:49:49	37	ar	us		1	ar	receive text message state possible update expiration date national id application however error message repeatedly appear state operation perform moment please fix issue	Negative	0	1	0
Google Play Store	04700a5b-bfcb-4107-a6ce-d6c16fe725d3	The application is excellent, but it has a problem. There is no option to share the transfer, payment, or download notification.	Ali Ahmed	2023-01-30 18:53:45	نعتذر للمشكلة التي واجهتك ونشكر لك ملاحظاتك لمساعدتك يرجى مشاركتنا تفاصيل المشكلة التي واجهتك عبر الرابط https://anb.tw/3Vpq1cv او يمكنك مراسلتنا على حسابنا في تويتر @anb_care شكرا لك.	2023-02-13 07:38:58	4	ar	us		5	ar	application excellent problem option share transfer payment download notification	Negative	1	1	0
Google Play Store	3afacb57-6717-424b-81f6-2668f27ab80e	👍👍👍👍👍👍👍 The best bank 👍👍👍👍👍👍👍	حسين القحطاني	2023-01-30 08:45:02	نحن سعيدين بمشاركتنا رأيك وتجربتك معنا. شكرا لك	2023-02-13 07:36:24	0	ar	us		5	ar	best bank	Positive	0	0	0
Google Play Store	9d05424a-5450-40d4-a0cd-124bf43ac28e	The mobile application is frozen/hanging.	Maha Fa	2023-01-29 19:54:34	نعتذر للمشكلة التي واجهتك ونشكر لك ملاحظاتك لمساعدتك يرجى مشاركتنا تفاصيل المشكلة التي واجهتك عبر الرابط https://anb.tw/3Vpq1cv او يمكنك مراسلتنا على حسابنا في تويتر @anb_care شكرا لك.	2023-02-13 07:32:50	1	ar	us		1	ar	mobile application frozenhanging	Negative	0	0	1
Google Play Store	0321d1a8-92ac-4d9f-a8e8-9954eb45b2e7	Why does it ask for the PIN for the ATM card?	maged m	2023-01-29 14:30:50	نعتذر للمشكلة التي واجهتك ونشكر لك ملاحظاتك لمساعدتك يرجى مشاركتنا تفاصيل المشكلة التي واجهتك عبر الرابط https://anb.tw/3Vpq1cv او يمكنك مراسلتنا على حسابنا في تويتر @anb_care شكرا لك.	2023-02-13 07:31:08	1	ar	us		1	ar	ask pin atm card	Neutral	0	1	0
Google Play Store	058cb784-377e-4142-ae23-00a5fa71aafc	The program is great but it is delayed.	ايمن محزري	2023-01-28 18:51:05	نعتذر للمشكلة التي واجهتك ونشكر لك ملاحظاتك لمساعدتك يرجى مشاركتنا تفاصيل المشكلة التي واجهتك عبر الرابط https://anb.tw/3Vpq1cv او يمكنك مراسلتنا على حسابنا في تويتر @anb_care شكرا لك.	2023-02-13 07:30:26	0	ar	us		1	ar	program great delay	Negative	1	0	1
Google Play Store	8e9b4acb-84eb-4a33-831d-4d509443cc87	How can you receive the verification code without registering your mobile number?	‪Abojawad “Almabbdyalharbi” Al_hrbi‬‏	2023-01-28 12:15:31	نعتذر للمشكلة التي واجهتك ونشكر لك ملاحظاتك لمساعدتك يرجى مشاركتنا تفاصيل المشكلة التي واجهتك عبر الرابط https://anb.tw/3Vpq1cv شكرا لزيارتك.	2023-08-13 05:38:24	1	ar	us		2	ar	receive verification code without register mobile number	Neutral	0	1	0
Google Play Store	9db81ddd-9859-4407-bab9-e216cc7adee3	MashaAllah, TabarakAllah	من ذوي الاحتياجات الخاصة Hamed (حامد)	2023-01-25 21:25:02	نحن سعيدين بمشاركتنا رأيك وتجربتك معنا. شكرا لك	2023-08-13 05:40:02	0	ar	us		5	ar	mashaallah tabarakallah	Positive	1	0	0
Google Play Store	190abf38-1024-41c4-bd31-5f6691405c95	Easy and trustworthy application.. Very excellent.	Kaled 1991	2023-01-25 15:38:38	نحن سعيدين بمشاركتنا رأيك وتجربتك معنا. شكرا لك	2023-02-12 12:59:11	1	ar	us		5	ar	easy trustworthy application excellent	Positive	0	0	0
Google Play Store	f91425ec-258c-46a8-8088-438bb7b4cafd	It was working well, but for a month it became bad. I deleted the application and downloaded it again, but the problem still persists. I receive the message "has timed out."	ا / محمد عبود	2023-01-23 18:04:30	نعتذر للمشكلة التي واجهتك ونشكر لك ملاحظاتك لمساعدتك يرجى مشاركتنا تفاصيل المشكلة التي واجهتك عبر الرابط https://anb.tw/3Vpq1cv شكرا لك.	2023-02-12 12:56:02	3	ar	us		4	ar	work well month become bad delete application download problem still persist receive message time	Negative	1	1	0
Google Play Store	05b2af66-d779-42d3-b2cf-67a6c10d087a	Very good application.	Bandar Khalil	2023-01-19 23:03:56	نحن سعيدين بمشاركتنا رأيك وتجربتك معنا. شكرا لك	2023-02-12 12:46:37	1	ar	us		4	ar	good application	Positive	0	0	0
Google Play Store	93e45313-f442-42a5-bf7f-324bd8ea5049	The worst bank in terms of service and it does not have services like some other banks. 👎	حسن	2023-01-19 14:03:23	نعتذر للمشكلة التي واجهتك ونشكر لك ملاحظاتك لمساعدتك يرجى مشاركتنا تفاصيل المشكلة التي واجهتك عبر الرابط https://anb.tw/3Vpq1cv شكرا لزيارتك.	2023-02-12 09:48:26	0	ar	us		1	ar	bad bank term service service like bank	Negative	1	0	0
Google Play Store	0b6ec9bc-0ed3-4ccd-a63c-695c16dc950e	Very bad, as payment is not accepted.	ام عبدالاله	2023-01-17 15:36:51	نعتذر للمشكلة التي واجهتك ونشكر لك ملاحظاتك لمساعدتك يرجى مشاركتنا تفاصيل المشكلة التي واجهتك عبر الرابط https://anb.tw/3Vpq1cv شكرا لزيارتك.	2023-02-12 09:38:31	0	ar	us		1	ar	bad payment accept	Negative	1	1	0
Google Play Store	26175a5c-7e0f-4ea0-84cd-42401c3d48ec	A fun and wonderful application, may Allah reward you with goodness and place it in the scale of your good deeds.	Abdu Hamid	2023-01-17 08:32:04	نحن سعيدين بمشاركتنا رأيك وتجربتك معنا. شكرا لك	2023-02-12 09:34:13	2	ar	us		5	ar	fun wonderful application may allah reward goodness place scale good deeds	Positive	1	0	0
Google Play Store	e02f1ce6-edd5-43f2-8c6a-1517e8ed90ac	Now it has just been downloaded and I will try it, God willing.	Ibrahim Ramadan	2023-01-16 09:06:14	نحن سعيدين بمشاركتنا رأيك وتجربتك معنا شكرا لك .	2023-02-12 09:25:05	2	ar	us		5	ar	download try god will	Positive	0	1	0
Google Play Store	479b97d8-f31f-4e63-8260-92fbfb3332db	Slow, with delayed messages, and its systems are as bad as the bank itself.	علي التمامي	2023-01-15 14:04:18	We apologize about your experience, Please contact us via https://anb.tw/3Vpq1cv for further assistance. Thank you for your feedback!	2023-02-12 09:16:59	1	ar	us		1	ar	slow delay message systems bad bank	Negative	1	0	1
Google Play Store	a2cfd067-7fbe-43dc-81f8-b3795ef65252	A wonderful and easy application.	mohmmad msawa	2023-01-15 08:05:03	نحن سعيدين بمشاركتنا رأيك وتجربتك معنا ونتطلع لرؤيتك مجددا. شكرا لك	2023-02-12 09:16:03	3	ar	us		5	ar	wonderful easy application	Positive	0	0	0
Google Play Store	6267dd5c-12ba-4f31-ab32-88945e673588	The bank's leadership is completely worthless; if they were removed and the Arabic name abolished, the world would calm down, praise be to Allah. They have a useless application claiming that they are like other banks, but the application is rotten.	Narjes Narjes	2023-01-14 21:42:09	نعتذر للمشكلة التي واجهتك ونشكر لك ملاحظاتك لمساعدتك يرجى مشاركتنا تفاصيل المشكلة التي واجهتك عبر الرابط https://anb.tw/3Vpq1cv	2023-02-12 09:14:39	0	ar	us		1	ar	bank leadership completely worthless remove arabic name abolish world would calm praise allah useless application claim like bank application rotten	Negative	1	0	0
Google Play Store	26934732-c3f2-462a-b188-c3d6619f355e	I haven't received any updates for a long time, and the application refuses to work for me, claiming that I have exceeded the limit of devices used!	doumbiabf adama	2023-01-10 05:26:06	نعتذر للمشكلة التي واجهتك ونشكر لك ملاحظاتك لمساعدتك يرجى مشاركتنا تفاصيل المشكلة التي واجهتك عبر الرابط https://anb.tw/3Vpq1cv شكرا لزيارتك.	2023-01-12 14:23:09	4	ar	us		1	ar	havent receive update long time application refuse work claim exceed limit devices use	Negative	0	1	0
Google Play Store	e5a50afd-1f12-4106-8467-fed78706bf37	Weak and heavy program	Ayman Elhomy	2023-01-09 14:14:14	نعتذر للمشكلة التي واجهتك ونشكر لك ملاحظاتك لمساعدتك يرجى مشاركتنا تفاصيل المشكلة التي واجهتك عبر الرابط https://anb.tw/3Vpq1cv شكرا لزيارتك.	2023-01-12 14:24:00	0	ar	us		5	ar	weak heavy program	Negative	1	0	0
Google Play Store	1efcaf4c-2d8d-479b-b0fd-0d26e903858f	The application has been bad since yesterday afternoon. I'm trying to transfer money through it, but it says there's a system error. Please try again later. In addition to that, when I click on the acceptance of the terms and conditions, it takes me back to the previous page. I've tried a hundred times and it only worked once, but still, there's a system error. It deserves half a star or even a q…	Eltiy Muslim	2023-01-09 02:59:30	نعتذر للمشكلة التي واجهتك ونشكر لك ملاحظاتك لمساعدتك يرجى مشاركتنا تفاصيل المشكلة التي واجهتك عبر الرابط https://anb.tw/3Vpq1cv شكرا لزيارتك.	2023-01-12 14:24:12	2	ar	us		1	ar	application bad since yesterday afternoon im try transfer money say theres system error please try late addition click acceptance term condition take back previous page ive try hundred time work still theres system error deserve half star even quarter	Negative	1	1	0
Google Play Store	000eb2ca-09a5-494f-affb-85b9dca5b4da	Wonderful experience, I thank all those in charge of the bank. In truth, there is no bank that appreciates customers like this bank.	‪Jalal “F” Jaafari‬‏	2023-01-08 15:39:11	نحن سعيدين بمشاركتنا رأيك وتجربتك معنا ونتطلع لرؤيتك مجددا. شكرا لزيارتك.	2023-01-12 16:59:52	1	ar	us		5	ar	wonderful experience thank charge bank truth bank appreciate customers like bank	Positive	0	0	0
Google Play Store	7159ba8d-8ba3-42ba-9258-84d09ba00276	A very beautiful program, but the problem is that some idiots don't know how to use it hahahahahaha	محامي الزعيم	2023-01-07 18:32:12			3	ar	us		5	ar	beautiful program problem idiots dont know use hahahahahaha	Negative	1	1	0
Google Play Store	5f00ef42-b079-420e-b57c-4c57107386ae	Everything is good, please add the dark mode and the feature of showing and hiding accounts.	ياسر	2023-01-07 12:21:19	شكرا لك سوف يتم اخذ ملاحظتك بعين الاعتبار ، نتطلع لرؤيتك مجددا. شكرا لزيارتك.	2022-12-11 22:56:50	4	ar	us		4	ar	everything good please add dark mode feature show hide account	Positive	1	0	0
Google Play Store	cdfcd019-b825-46a6-a52b-c51604c5211d	"Khais" translates to "bad" or "miserable" in English.	Faiz Ggg	2023-01-07 05:11:39	نعتذر للمشكلة التي واجهتك ونشكر لك ملاحظاتك لمساعدتك يرجى مشاركتنا تفاصيل المشكلة التي واجهتك عبر الرابط https://anb.tw/3Vpq1cv شكرا لزيارتك.	2023-01-08 15:29:07	0	ar	us		1	ar	khais translate bad miserable english	Negative	1	0	0
Google Play Store	52fd8134-c6b0-44b2-bedb-dfc3b8c970ba	Poor service	Ali Ali	2023-01-05 10:39:34	نعتذر للمشكلة التي واجهتك ونشكر لك ملاحظاتك لمساعدتك يرجى مشاركتنا تفاصيل المشكلة التي واجهتك عبر الرابط https://anb.tw/3Vpq1cv شكرا لزيارتك.	2023-01-08 15:28:30	0	ar	us		1	ar	poor service	Negative	1	0	0
Google Play Store	e2234095-c4b0-4b9e-9540-7e839b4f3726	It has become easier than before.	Mobarak Khmis	2023-01-03 08:28:15	نحن سعيدين بمشاركتنا رأيك وتجربتك معنا ونتطلع لرؤيتك مجددا. شكرا لزيارتك.	2023-01-04 17:36:11	1	ar	us		5	ar	become easy	Positive	0	0	0
Google Play Store	9e152e51-f0a7-419c-94f5-c32a2e1739ae	I swear to God, you don't deserve a shoe sole, let alone a star. I swear on that, look at the tweet I wrote for a retired person. We tried every way to enter, then register anew. The damn system says he is registered and can enter, and then - he tries to log in quickly and asks for the output from a device that was stolen a year ago. What a good situation. Fine, let's enter normally. It refuses, …	صقر ”غيث“ سليمان الشمري	2023-01-02 03:18:41	نعتذر للمشكلة التي واجهتك ونشكر لك ملاحظاتك لمساعدتك يرجى مشاركتنا تفاصيل المشكلة التي واجهتك عبر الرابط https://anb.tw/3Vpq1cv شكرا لزيارتك.	2023-01-04 17:34:35	2	ar	us		1	ar	swear god dont deserve shoe sole let alone star swear look tweet write retire person try every way enter register anew damn system say register enter try log quickly ask output device steal year ago good situation fine let enter normally refuse say exceed allow number screw developer arabs swear zero delete advise care nonsense focus development alrajhi	Negative	1	1	0
Google Play Store	30fa8f5b-ba2a-4e5c-aaf6-4ead68a847a4	The worst bank	FOX12	2023-01-01 11:26:25	نعتذر للمشكلة التي واجهتك ونشكر لك ملاحظاتك لمساعدتك يرجى مشاركتنا تفاصيل المشكلة التي واجهتك عبر الرابط https://anb.tw/3Vpq1cv شكرا لزيارتك.	2023-01-04 17:36:35	0	ar	us		1	ar	bad bank	Negative	1	0	0
Google Play Store	7e5ad52b-b65f-4095-81dc-50d157471259	An account from an application has been closed and I am unable to log into it.	نايف النهاري	2023-01-01 05:19:24	نعتذر للمشكلة التي واجهتك ونشكر لك ملاحظاتك لمساعدتك يرجى مشاركتنا تفاصيل المشكلة التي واجهتك عبر الرابط https://anb.tw/3Vpq1cv شكرا لزيارتك.	2023-01-02 14:29:12	1	ar	us		1	ar	account application close unable log	Negative	0	1	0
Google Play Store	ca42a11d-5d90-4701-bdc2-a7e5b1bdaae8	Very bad, he does not want to access the old or new device and says that he has surpassed trusted devices, even though the device itself has not changed.	tlal flmban	2022-12-31 13:34:38	نعتذر للمشكلة التي واجهتك ونشكر لك ملاحظاتك لمساعدتك يرجى مشاركتنا تفاصيل المشكلة التي واجهتك عبر الرابط https://anb.tw/3Vpq1cv شكرا لزيارتك.	2023-01-02 18:49:48	9	ar	us		1	ar	bad want access old new device say surpass trust devices even though device change	Negative	1	1	0
Google Play Store	7c2b9ea9-bcfb-43a4-b5e6-82c1c8827a9b	Under testing/ under experiment	محمد السميري	2022-12-28 15:08:58	شكرا لك سوف يتم اخذ ملاحظتك بعين الاعتبار ، نتطلع لرؤيتك مجددا. شكرا لزيارتك.	2023-01-01 17:46:12	0	ar	us		3	ar	test experiment	Neutral	0	1	0
Google Play Store	0da6aa75-6827-4ff7-ab64-44e8beb25e21	I always face problems when logging in on Android, while the opposite is true on iPhone. The program allows me to log in without any issues. I don't know what the problem is.	sk 77	2022-12-28 06:50:28	نعتذر للمشكلة التي واجهتك ونشكر لك ملاحظاتك لمساعدتك يرجى مشاركتنا تفاصيل المشكلة التي واجهتك عبر الرابط https://anb.tw/3Vpq1cv شكرا لزيارتك.	2023-01-01 17:43:08	3	ar	us		1	ar	always face problems log android opposite true iphone program allow log without issue dont know problem	Negative	0	1	0
Google Play Store	1544e104-8ca0-47dd-8b6c-0ac6e2d52f93	"The star is too much for you and very big on you, from the day when STC Pay, the Arab Bank, became the worst and bad to the last thing and to the lowest of the low. And do not download this application because it is a waste of time, thinking, and nerves."	عبدالعزيز بنجر	2022-12-27 15:23:03	نعتذر للمشكلة التي واجهتك ونشكر لك ملاحظاتك لمساعدتك يرجى مشاركتنا تفاصيل المشكلة التي واجهتك عبر الرابط https://anb.tw/3Vpq1cv شكرا لزيارتك.	2023-01-01 17:43:00	1	ar	us		1	ar	star much big day stc pay arab bank become bad bad last thing low low download application waste time think nerve	Negative	1	0	1
Google Play Store	32e63286-b34b-4d89-8470-48df46cd4dda	"The application was working well, but for the past week, whenever I try to login, a static blue screen appears on the entire screen. I deleted the program and re-downloaded it, but the same problem persists. Nothing has changed."	a1___t1 SA	2022-12-26 07:08:01	نعتذر للمشكلة التي واجهتك ونشكر لك ملاحظاتك لمساعدتك يرجى مشاركتنا تفاصيل المشكلة التي واجهتك عبر الرابط https://anb.tw/3Vpq1cv شكرا لزيارتك.	2022-12-28 12:24:59	67	ar	us		3	ar	application work well past week whenever try login static blue screen appear entire screen delete program redownloaded problem persist nothing change	Negative	0	1	0
Google Play Store	9a7924b4-677c-4c06-a584-86f3c3481197	The application is very bad... It is a burden on the customer, and on his device's memory. It does not serve its purpose and does not provide any service to the customer, at least the account statement is not available, with the few branches you have, there is a poor technology in the application. May God help Arab National Bank's customers, especially since most of them are retirees and elderly.…	Ffff22 Zzzzff	2022-12-25 18:41:48	نعتذر للمشكلة التي واجهتك ونشكر لك ملاحظاتك لمساعدتك يرجى مشاركتنا تفاصيل المشكلة التي واجهتك عبر الرابط https://anb.tw/3Vpq1cv شكرا لزيارتك.	2022-12-28 12:26:32	3	ar	us		1	ar	application bad burden customer devices memory serve purpose provide service customer least account statement available branch poor technology application may god help arab national bank customers especially since retire elderly please considerate customers anb	Negative	1	0	0
Google Play Store	4a3b9bcc-26c5-4421-9a05-a9bf0ca92def	Very, very unsuccessful.	Fjf Bb	2022-12-24 18:48:22	نعتذر للمشكلة التي واجهتك ونشكر لك ملاحظاتك لمساعدتك يرجى مشاركتنا تفاصيل المشكلة التي واجهتك عبر الرابط https://anb.tw/3Vpq1cv شكرا لزيارتك.	2022-12-28 12:27:13	1	ar	us		1	ar	unsuccessful	Negative	1	0	0
Google Play Store	e4cd2941-fe2d-4bb6-b630-25bf55fc240b	There is no data update from the program, even though the message comes saying "update the data from the program" and there is no update.	شريف حمدي	2022-12-23 05:00:41	نعتذر للمشكلة التي واجهتك ونشكر لك ملاحظاتك لمساعدتك يرجى مشاركتنا تفاصيل المشكلة التي واجهتك عبر الرابط https://anb.tw/3Vpq1cv شكرا لزيارتك.	2022-12-28 12:20:12	6	ar	us		1	ar	data update program even though message come say update data program update	Negative	0	1	0
Google Play Store	884d62fa-d680-48a9-b9f5-a885410e7912	The application is bad, and if there was less than one star, I would give it.	MR. RASHID S	2022-12-21 17:59:54	نعتذر للمشكلة التي واجهتك ونشكر لك ملاحظاتك لمساعدتك يرجى مشاركتنا تفاصيل المشكلة التي واجهتك عبر الرابط https://anb.tw/3Vpq1cv شكرا لزيارتك.	2022-12-28 12:20:31	1	ar	us		1	ar	application bad less one star would give	Negative	1	0	0
Google Play Store	d7ff02ed-3a9a-4763-acd7-4733a0d91776	Excellent and very distinctive.	Wael Bagel	2022-12-21 07:52:28	نحن سعيدين بمشاركتنا رأيك وتجربتك معنا ونتطلع لرؤيتك مجددا. شكرا لزيارتك.	2022-12-28 12:21:25	1	ar	us		5	ar	excellent distinctive	Positive	0	0	0
Google Play Store	2d0929e1-d468-438e-a942-181c5d09642e	bad	علي	2022-12-19 10:55:11	نعتذر للمشكلة التي واجهتك ونشكر لك ملاحظاتك لمساعدتك يرجى مشاركتنا تفاصيل المشكلة التي واجهتك عبر الرابط https://anb.tw/3Vpq1cv شكرا لزيارتك.	2022-12-28 12:15:22	0	ar	us		1	ar	bad	Negative	1	0	0
Google Play Store	6ecd7434-8b54-40bb-abdd-dce5b9da6277	Modification: I have some issues with the program. It is not working properly. There are a few features that are not functioning, such as the transfers feature. The financial situation involves financing investments.	عبدالله خالد آل حميدي	2022-12-19 03:53:42	نعتذر للمشكلة التي واجهتك ونشكر لك ملاحظاتك لمساعدتك يرجى مشاركتنا تفاصيل المشكلة التي واجهتك عبر الرابط https://anb.tw/3Vpq1cv شكرا لزيارتك.	2022-12-28 12:17:05	2	ar	us		5	ar	modification issue program work properly feature function transfer feature financial situation involve finance investments	Negative	0	1	0
Google Play Store	ebb97ec1-719e-477e-ac40-7d4fc2bae169	Excellent, excellent. I have been dealing with him for 29 years.	عبده الفيفي	2022-12-17 18:28:18	نحن سعيدين بمشاركتنا رأيك وتجربتك معنا ونتطلع لرؤيتك مجددا. شكرا لزيارتك.	2022-12-28 12:19:00	3	ar	us		5	ar	excellent excellent deal years	Positive	0	0	0
Google Play Store	74db6d7e-1757-4784-b9a1-e821069eb634	I have been trying to log in for two months after completing the password change process. I receive a call to confirm the password and then apologize for a system error.	ابوطلال Alsharare	2022-12-16 21:20:50	نعتذر للمشكلة التي واجهتك ونشكر لك ملاحظاتك لمساعدتك يرجى مشاركتنا تفاصيل المشكلة التي واجهتك عبر الرابط https://anb.tw/3Vpq1cv شكرا لزيارتك.	2022-12-28 12:10:55	2	ar	us		1	ar	try log two months complete password change process receive call confirm password apologize system error	Neutral	0	1	0
Google Play Store	7babf5d4-c146-4759-a869-c3e043cea0ac	The application is very bad and the customer service is poor.	معلومة	2022-12-15 13:39:57	نعتذر للمشكلة التي واجهتك ونشكر لك ملاحظاتك لمساعدتك يرجى مشاركتنا تفاصيل المشكلة التي واجهتك عبر الرابط https://anb.tw/3Vpq1cv شكرا لزيارتك.	2022-12-28 12:11:45	1	ar	us		1	ar	application bad customer service poor	Negative	1	0	0
Google Play Store	4a7cd701-18db-4872-af41-242791085342	The application is no longer sending notifications and I cannot log in or transfer to anyone.	زياد جان	2022-12-15 08:29:34	نعتذر للمشكلة التي واجهتك ونشكر لك ملاحظاتك لمساعدتك يرجى مشاركتنا تفاصيل المشكلة التي واجهتك عبر الرابط https://anb.tw/3Vpq1cv شكرا لزيارتك.	2022-12-28 12:12:46	0	ar	us		1	ar	application long send notifications log transfer anyone	Negative	0	1	0
Google Play Store	ad08881d-aa65-4fc8-b6d7-4d0eab3f3fc1	The worst bank in Saudi Arabia, every time you enter, it tells you there is an error in the system.	abooa Mjrshy	2022-12-15 04:10:59	نعتذر للمشكلة التي واجهتك ونشكر لك ملاحظاتك لمساعدتك يرجى مشاركتنا تفاصيل المشكلة التي واجهتك عبر الرابط https://anb.tw/3Vpq1cv شكرا لزيارتك.	2022-12-28 12:13:21	0	ar	us		1	ar	bad bank saudi arabia every time enter tell error system	Negative	1	1	0
Google Play Store	06a0d01a-f02c-4979-9362-59699e4bffc3	I have been trying to log in for a month, but the program is unsuccessful. It gives me a system error message and asks me to try again later. I called the bank's number, but it still doesn't work. The previous program was better.	Hassan Hassan	2022-12-12 22:12:14			19	ar	us		1	ar	try log month program unsuccessful give system error message ask try late call bank number still doesnt work previous program good	Negative	1	1	0
Google Play Store	b24577f6-1a61-4471-903a-0e94e8a2761d	Very bad. I downloaded the app and tried to register two days ago but I keep getting an error message saying there were errors during the process. Everything seems strange.	عبدالله بارقي	2022-12-12 10:59:17			7	ar	us		1	ar	bad download app try register two days ago keep get error message say errors process everything seem strange	Negative	1	1	0
Google Play Store	3787a58d-1d5c-4e3b-a86c-c53448d8f5a4	Excellent services and attention to customer feedback on the application. I had a comment on the application, and the bank contacted me to clarify and resolve it. Thank you for your efforts.	بستان العلوم	2022-12-12 08:21:53	نعتذر للمشكلة التي واجهتك ونشكر لك ملاحظاتك لمساعدتك يرجى مشاركتنا تفاصيل المشكلة التي واجهتك عبر الرابط https://anb.tw/3Vpq1cv شكرا لزيارتك.	2022-12-11 20:14:53	2	ar	us		5	ar	excellent service attention customer feedback application comment application bank contact clarify resolve thank efforts	Positive	1	0	0
Google Play Store	2b240c19-f6f2-416a-8a6d-b1d62317628e	The application does not work at all. The username cannot be entered in the field no matter how hard I try. The service at the branch is disrespectful and your application does not work. Even the website does not work. It's a complete disaster on all levels. 300 riyals, I don't know how to transfer them. I went to the branch but they wouldn't let the employees work. I don't know what's wrong with…	نوار محمد	2022-12-12 04:24:24	نعتذر للمشكلة التي واجهتك ونشكر لك ملاحظاتك لمساعدتك يرجى مشاركتنا تفاصيل المشكلة التي واجهتك عبر الرابط https://anb.tw/3Vpq1cv شكرا لزيارتك.	2022-12-11 22:58:46	0	ar	us		1	ar	application work username enter field matter hard try service branch disrespectful application work even website work complete disaster level riyals dont know transfer go branch wouldnt let employees work dont know whats wrong applications honest arab branch dar alilm jeddah bad branch ever may god take care thank god close account leave useless bank	Negative	1	1	0
Google Play Store	b52b2363-b7b3-46cd-a736-41900ddcbe6a	If the application returns back as it was, I will download it again.	Ahmad Algallaf	2022-12-12 03:03:53	نعتذر للمشكلة التي واجهتك ونشكر لك ملاحظاتك لمساعدتك يرجى مشاركتنا تفاصيل المشكلة التي واجهتك عبر الرابط https://anb.tw/3Vpq1cv شكرا لزيارتك.	2022-12-11 23:00:34	0	ar	us		3	ar	application return back download	Neutral	0	1	0
Google Play Store	dc6270a3-5775-488c-9cbe-6b37f76a069c	The application is not working properly and it hangs a lot. It needs to be refreshed.	ABO FAHAD	2022-12-11 14:17:58			2	ar	us		2	ar	application work properly hang lot need refresh	Negative	0	0	1
Google Play Store	3cd1028e-7fba-49e8-9b3a-1957ca92e03d	Can I know why there is no trading application like other banks?	Shaheed Ahmad	2022-12-11 04:20:06	نعتذر للمشكلة التي واجهتك ونشكر لك ملاحظاتك لمساعدتك يرجى مشاركتنا تفاصيل المشكلة التي واجهتك عبر الرابط https://anb.tw/3Vpq1cv شكرا لزيارتك.	2022-12-12 21:57:49	0	ar	us		3	ar	know trade application like bank	Neutral	1	0	0
Google Play Store	146efeb8-8cfa-49c3-9074-a662aa8c1f43	I am denied entry, and it says "error in the system, please try again later." It has been like this for more than three months, so I have to enter through the website.	Abu Fahad Sa	2022-12-07 18:52:13	نعتذر للمشكلة التي واجهتك ونشكر لك ملاحظاتك لمساعدتك يرجى مشاركتنا تفاصيل المشكلة التي واجهتك عبر الرابط https://anb.tw/3Vpq1cv شكرا لزيارتك.	2022-12-11 20:12:01	3	ar	us		2	ar	deny entry say error system please try late like three months enter website	Negative	0	1	0
Google Play Store	4e2cdb0f-944a-4d61-82bc-322814560cc4	The program is very weak, most operations are rejected and it causes problems with the bank. It looks like a return to the Ahli (National Bank of Egypt).	فراس الحميدي الثقفي	2022-12-06 20:16:40	نعتذر للمشكلة التي واجهتك ونشكر لك ملاحظاتك لمساعدتك يرجى مشاركتنا تفاصيل المشكلة التي واجهتك عبر الرابط https://anb.tw/3Vpq1cv شكرا لزيارتك.	2022-12-11 20:12:54	2	ar	us		1	ar	program weak operations reject cause problems bank look like return ahli national bank egypt	Negative	1	1	1
Google Play Store	be314739-8111-4d0d-a0ec-7784b7c7c636	The bank is very, very bad and the employees of its city branches have a very bad attitude. And if you want to add a beneficiary, you can only do it from the mobile app, not from the computer, and you have to keep switching back and forth in Arabic.	FUAD SHAMSAN	2022-12-06 08:21:21	نعتذر للمشكلة التي واجهتك ونشكر لك ملاحظاتك لمساعدتك يرجى مشاركتنا تفاصيل المشكلة التي واجهتك عبر الرابط https://anb.tw/3Vpq1cv شكرا لزيارتك.	2022-12-11 20:14:01	2	ar	us		1	ar	bank bad employees city branch bad attitude want add beneficiary mobile app computer keep switch back forth arabic	Negative	1	0	0
Google Play Store	c2b4a249-2117-4df6-9d6e-3919d0da9b6a	Very distinctive, easy to use, and safe.	Nedhal Mughais	2022-12-05 10:20:59	نحن سعيدين بمشاركتنا رأيك وتجربتك معنا ونتطلع لرؤيتك مجددا. شكرا لزيارتك.	2022-12-11 20:15:47	2	ar	us		5	ar	distinctive easy use safe	Positive	0	0	0
Google Play Store	9fe13270-f091-4e5f-bccd-bd0734055ee8	Worst, worst, worst, dirtiest bank.	محمد حكمي	2022-12-05 08:41:42	نعتذر للمشكلة التي واجهتك ونشكر لك ملاحظاتك لمساعدتك يرجى مشاركتنا تفاصيل المشكلة التي واجهتك عبر الرابط https://anb.tw/3Vpq1cv شكرا لزيارتك.	2022-12-11 20:15:12	0	ar	us		5	ar	bad bad bad dirty bank	Negative	1	0	0
Google Play Store	99edd722-8ac0-4a22-b961-2dc988488cb5	I'm very sorry, I can't log in. It says there is no internet connection, even though the network is 5G.	Mujahed Yousif	2022-12-03 13:55:15	نعتذر للمشكلة التي واجهتك ونشكر لك ملاحظاتك لمساعدتك يرجى مشاركتنا تفاصيل المشكلة التي واجهتك عبر الرابط https://anb.tw/3Vpq1cv شكرا لزيارتك.	2022-12-06 05:05:24	2	ar	us		1	ar	im sorry cant log say internet connection even though network g	Negative	0	1	0
Google Play Store	c107538c-357a-45b3-8184-8bf73c1e0982	Excellent and easy to use.	Musad Almansoor	2022-12-02 21:12:58	نحن سعيدين بمشاركتنا رأيك وتجربتك معنا ونتطلع لرؤيتك مجددا. شكرا لزيارتك.	2022-12-06 05:06:28	2	ar	us		5	ar	excellent easy use	Positive	0	0	0
Google Play Store	1a67a871-b55e-4c61-a92a-994eaf0083c4	A Stone Age bank, think a thousand times before opening an account with them.	ماجد العتيبي	2022-11-30 03:39:35	نعتذر للمشكلة التي واجهتك ونشكر لك ملاحظاتك لمساعدتك يرجى مشاركتنا تفاصيل المشكلة التي واجهتك عبر الرابط https://anb.tw/3Vpq1cv شكرا لزيارتك.	2022-12-06 05:11:28	1	ar	us		1	ar	stone age bank think thousand time open account	Negative	1	0	0
Google Play Store	20d85590-a35f-49e8-bcaa-96b83fb2d959	Thank you, Arabic, for all your great efforts.	Alia 78	2022-11-28 17:21:46	نحن سعيدين بمشاركتنا رأيك وتجربتك معنا ونتطلع لرؤيتك مجددا. شكرا لزيارتك.	2022-12-06 05:12:49	1	ar	us		5	ar	thank arabic great efforts	Positive	0	0	0
Google Play Store	215a9304-8015-45ff-85a0-cd5887f969e3	There is a problem with the design of the Tel Mooney application when implementing conflicting terms and conditions. I am unable to make transfers during the process.	Ahmed Aa	2022-11-27 15:32:24	نعتذر للمشكلة التي واجهتك ونشكر لك ملاحظاتك لمساعدتك يرجى مشاركتنا تفاصيل المشكلة التي واجهتك عبر الرابط https://anb.tw/3Vpq1cv شكرا لزيارتك.	2022-12-06 05:13:50	3	ar	us		3	ar	problem design tel mooney application implement conflict term condition unable make transfer process	Negative	0	1	0
Google Play Store	884b7e7b-597f-4e77-944a-aa67ae5e35df	It is very bad that I can only transfer once per hour. Al Rajhi Bank is much better in terms of withdrawing cash in Arabic.	Roro M	2022-11-27 05:53:02	نعتذر للمشكلة التي واجهتك ونشكر لك ملاحظاتك لمساعدتك يرجى مشاركتنا تفاصيل المشكلة التي واجهتك عبر الرابط https://anb.tw/3Vpq1cv شكرا لزيارتك.	2022-12-06 05:14:05	4	ar	us		1	ar	bad transfer per hour al rajhi bank much good term withdraw cash arabic	Negative	1	1	0
Google Play Store	34fb8fd6-b500-4f59-a941-b7c69670d3bb	Very bad. The confirmation number only arrives after the time is up, even though the device is registered and used regularly. I hope to solve this problem, it is a very bad situation, especially for those who are abroad. Our transactions are delayed and we cannot pay the basic bills.	faten fodah	2022-11-27 02:08:47	نعتذر للمشكلة التي واجهتك ونشكر لك ملاحظاتك لمساعدتك يرجى مشاركتنا تفاصيل المشكلة التي واجهتك عبر الرابط https://anb.tw/3Vpq1cv شكرا لزيارتك.	2022-12-06 05:14:21	30	ar	us		1	ar	bad confirmation number arrive time even though device register use regularly hope solve problem bad situation especially abroad transactions delay pay basic bill	Negative	1	1	1
Google Play Store	bf24fe37-41d1-4005-a2b1-6779044f205b	Excellent, very good.	علي عسيري	2022-11-25 14:13:47	نحن سعيدين بمشاركتنا رأيك وتجربتك معنا ونتطلع لرؤيتك مجددا. شكرا لزيارتك.	2022-12-06 08:34:47	0	ar	us		5	ar	excellent good	Positive	0	0	0
Google Play Store	6cc6e5fd-4f8a-4075-a5b4-cdd77319217d	"The application is more than bad."	samira Ahmed	2022-11-24 10:23:13	نعتذر للمشكلة التي واجهتك ونشكر لك ملاحظاتك لمساعدتك يرجى مشاركتنا تفاصيل المشكلة التي واجهتك عبر الرابط https://anb.tw/3Vpq1cv شكرا لزيارتك.	2022-12-06 08:35:59	1	ar	us		1	ar	application bad	Negative	1	0	0
Google Play Store	618e71a1-ab35-492a-9db3-c644cfe65019	The only application they update every week, and yet I still face the problem of Arabic login, it's frustrating. I'm going to transfer my salary to another bank.	شاهين	2022-11-23 23:07:43	نعتذر للمشكلة التي واجهتك ونشكر لك ملاحظاتك لمساعدتك يرجى مشاركتنا تفاصيل المشكلة التي واجهتك عبر الرابط https://anb.tw/3Vpq1cv شكرا لزيارتك.	2022-12-06 08:36:57	1	ar	us		1	ar	application update every week yet still face problem arabic login frustrate im go transfer salary another bank	Negative	1	1	0
Google Play Store	0088c6d5-898f-46da-bab4-489f0e7b75bf	Excellent very very	ابوريان المحزري	2022-11-22 20:06:15	نحن سعيدين بمشاركتنا رأيك وتجربتك معنا ونتطلع لرؤيتك مجددا. شكرا لزيارتك.	2022-12-06 08:38:24	0	ar	us		5	ar	excellent	Positive	0	0	0
Google Play Store	7a637cdb-bad6-4f2f-a82d-2463aa3a194f	The worst bank in every aspect.	محمد الحايكي	2022-11-19 14:44:26	مرحبا محمد ✋ في حال وجود اي مشكلة يشرفنا تواصلك معنا عبر الاتصال : 8001244040 يومك جميل 💙	2022-11-27 09:54:18	0	ar	us		1	ar	bad bank every aspect	Negative	1	0	0
Google Play Store	3c00e4eb-23d5-49b7-839d-62353b26e4ef	An excellent program that allows easy bill payment with a very prestigious bank.	Amrali Saleh	2022-11-16 19:39:17	نحن سعيدين بمشاركتنا رأيك وتجربتك معنا ونتطلع لرؤيتك مجددا. شكرا لزيارتك.	2022-12-11 22:24:05	3	ar	us		5	ar	excellent program allow easy bill payment prestigious bank	Positive	1	0	0
Google Play Store	aea3dd9f-3918-4526-a864-dc70d07de76a	Excellent and more than wonderful application	Omnia Nwara	2022-11-13 17:12:15	نحن سعيدين بمشاركتنا رأيك وتجربتك معنا ونتطلع لرؤيتك مجددا. شكرا لزيارتك.	2022-12-11 22:44:18	0	ar	us		5	ar	excellent wonderful application	Positive	0	0	0
Google Play Store	3d0e3a17-8dbe-4374-8143-55b1b3071768	After the new update, I can't recharge my mobile numbers from the STC application. It's bad.	shms 40	2022-11-13 10:46:23	نعتذر للمشكلة التي واجهتك ونشكر لك ملاحظاتك لمساعدتك يرجى مشاركتنا تفاصيل المشكلة التي واجهتك عبر الرابط https://anb.tw/3Vpq1cv شكرا لزيارتك.	2022-12-11 22:45:07	2	ar	us		1	ar	new update cant recharge mobile number stc application bad	Negative	1	1	0
Google Play Store	57d47b1f-9afd-4fea-adaa-9ffa04978ed0	The worst banking application in Saudi Arabia, even a food delivery app is better than it.	عطية المالكي	2022-11-12 15:07:45	نعتذر للمشكلة التي واجهتك ونشكر لك ملاحظاتك لمساعدتك يرجى مشاركتنا تفاصيل المشكلة التي واجهتك عبر الرابط https://anb.tw/3Vpq1cv شكرا لزيارتك.	2022-12-11 22:45:17	1	ar	us		1	ar	bad bank application saudi arabia even food delivery app good	Negative	1	0	0
Google Play Store	ee20c3ea-ac48-4016-aeb0-3c04224ca0eb	The application is bad at transferring and paying bills, it always has errors in the system. It disrupted our affairs.	ناجي البقمي	2022-11-12 13:18:47	نعتذر للمشكلة التي واجهتك ونشكر لك ملاحظاتك لمساعدتك يرجى مشاركتنا تفاصيل المشكلة التي واجهتك عبر الرابط https://anb.tw/3Vpq1cv شكرا لزيارتك.	2022-12-11 22:45:35	3	ar	us		1	ar	application bad transfer pay bill always errors system disrupt affairs	Negative	1	1	0
Google Play Store	899807e9-92e6-4f1b-91f5-e7701ce3fd48	It means that if there is an update, the application gets stuck and the ATMs get stuck too. And your timing for updates is wrong, you set them at 9 in the morning when people have commitments. It's not reasonable to wait for the bank to finish updating.	Royal	2022-11-12 04:24:06	شكرا لك سوف يتم اخذ ملاحظتك بعين الاعتبار ، نتطلع لرؤيتك مجددا. شكرا لزيارتك.	2022-12-11 22:46:23	1	ar	us		3	ar	mean update application get stick atms get stick time update wrong set morning people commitments reasonable wait bank finish update	Negative	0	0	1
Google Play Store	669227e8-46b5-4fb8-bef4-9de1a52507f2	The worst banking application you can use in your life. The application creates 50 security walls.. But in the end, its quality is literally zero.. You can't see the details of your cards. The rewards system is non-existent. You enter the bank's official page.. to go to the official application download link, they put pictures without a download link 😂. Truly, it's a joke of a bank.. Not a bank w…	Eng,Ahmed ElAwady	2022-11-11 19:46:29	نعتذر للمشكلة التي واجهتك ونشكر لك ملاحظاتك لمساعدتك يرجى مشاركتنا تفاصيل المشكلة التي واجهتك عبر الرابط https://anb.tw/3Vpq1cv شكرا لزيارتك.	2022-12-11 22:47:37	2	ar	us		1	ar	bad bank application use life application create security wall end quality literally zero cant see detail card reward system nonexistent enter bank official page go official application download link put picture without download link truly joke bank bank keep savings let go back application try transfer stc pay account doesnt transfer say technical issue please try try make payment digital servic…	Negative	1	1	0
Google Play Store	2d8132d1-078b-4399-a1e6-0e3e15b9ea6b	I have obtained a digital card and I am unable to add it to Mada Pay because the card number is hidden and I cannot make it visible.	A7M3D	2022-11-10 08:29:23	نعتذر للمشكلة التي واجهتك ونشكر لك ملاحظاتك لمساعدتك يرجى مشاركتنا تفاصيل المشكلة التي واجهتك عبر الرابط https://anb.tw/3Vpq1cv شكرا لزيارتك.	2022-12-11 22:48:25	4	ar	us		2	ar	obtain digital card unable add mada pay card number hide make visible	Negative	0	1	0
Google Play Store	829cdd67-2738-4d81-a341-63cf8e8f3d32	The old application is better. The new one is bad, it does not allow quick access. I contacted the bank and did not find a solution.	هاني البندري	2022-11-09 06:03:59	نعتذر للمشكلة التي واجهتك ونشكر لك ملاحظاتك لمساعدتك يرجى مشاركتنا تفاصيل المشكلة التي واجهتك عبر الرابط https://anb.tw/3Vpq1cv شكرا لزيارتك.	2022-12-11 22:49:45	15	ar	us		1	ar	old application good new one bad allow quick access contact bank find solution	Negative	1	0	0
Google Play Store	ca9814c5-3d08-4b25-a439-ede68248ace3	Is it normal for me to be asked for my IBAN number when logging in? It only happened after updating the software. Is this normal?	نونو محمد	2022-11-07 12:45:31	نعتذر للمشكلة التي واجهتك ونشكر لك ملاحظاتك لمساعدتك يرجى مشاركتنا تفاصيل المشكلة التي واجهتك عبر الرابط https://anb.tw/3Vpq1cv شكرا لزيارتك.	2022-12-11 22:51:52	3	ar	us		1	ar	normal ask iban number log happen update software normal	Neutral	0	1	0
Google Play Store	558224ec-971a-4094-9565-4ebfa8b76227	All Arab applications have stopped and none of them are working!!! They told me until Friday and even today, Saturday, it still hasn't worked. We have been experiencing a two-day outage!! Is it possible that all of this is due to an update and none of the applications are functioning?	ebnmlook Hutheel	2022-11-05 18:03:18	نعتذر للمشكلة التي واجهتك ونشكر لك ملاحظاتك لمساعدتك يرجى مشاركتنا تفاصيل المشكلة التي واجهتك عبر الرابط https://anb.tw/3Vpq1cv شكرا لزيارتك.	2022-12-11 22:54:24	1	ar	us		1	ar	arab applications stop none work tell friday even today saturday still hasnt work experience twoday outage possible due update none applications function	Negative	0	1	0
Google Play Store	2bfa41de-0abd-427e-bfdf-0e854de7901c	I have a problem with the application. I have a digital card, but I cannot display the card information. The numbers are missing by xxxxx. How can I display the remaining numbers?	om2r	2022-11-05 10:08:47	نعتذر للمشكلة التي واجهتك ونشكر لك ملاحظاتك لمساعدتك يرجى مشاركتنا تفاصيل المشكلة التي واجهتك عبر الرابط https://anb.tw/3Vpq1cv شكرا لزيارتك.	2022-12-11 22:55:13	23	ar	us		2	ar	problem application digital card display card information number miss xxxxx display remain number	Negative	0	1	0
Google Play Store	fcc4c8a2-4277-4348-8f06-3d43ae74d73e	Excellent, we recommend everyone to use it.	عبد الرحمن باعمر	2022-11-04 19:16:09	نحن سعيدين بمشاركتنا رأيك وتجربتك معنا ونتطلع لرؤيتك مجددا. شكرا لزيارتك.	2022-12-11 22:54:51	1	ar	us		5	ar	excellent recommend everyone use	Positive	1	0	0
Google Play Store	5534f483-9153-4239-acef-a6cae60ccf1f	I can't open my account in the Arab Bank application now. The previous version was better, it used to open easily.	نايف NAIF النهاري ALNAHARI	2022-11-04 17:59:49	نعتذر للمشكلة التي واجهتك ونشكر لك ملاحظاتك لمساعدتك يرجى مشاركتنا تفاصيل المشكلة التي واجهتك عبر الرابط https://anb.tw/3Vpq1cv شكرا لزيارتك.	2022-12-11 22:55:26	1	ar	us		1	ar	cant open account arab bank application previous version good use open easily	Negative	0	1	0
Google Play Store	dfb2e8e0-dbb0-4f37-9756-2211be8701f7	Very bad, it's not opening and I always have a lot of problems with the Arab Bank's applications.	Aboood	2022-11-04 04:04:59	نعتذر للمشكلة التي واجهتك ونشكر لك ملاحظاتك لمساعدتك يرجى مشاركتنا تفاصيل المشكلة التي واجهتك عبر الرابط https://anb.tw/3Vpq1cv شكرا لزيارتك.	2022-12-11 22:56:10	0	ar	us		1	ar	bad open always lot problems arab bank applications	Negative	1	1	0
Google Play Store	cb7f74a9-344f-4753-a8b6-364c0678ff9f	My concern is that I know my balance so that I don't order from the cafeteria and then someone from Yemen tells me it's rejected, my cousin.	Qwe Asd	2022-11-02 18:04:06			0	ar	us		4	ar	concern know balance dont order cafeteria someone yemen tell reject cousin	Negative	1	0	0
Google Play Store	103759a3-48cb-49a9-a55b-89bc2db65b5f	The application does not authenticate the device. I hope to solve the problem. Thank you.	عمر	2022-11-01 05:44:48	نعتذر للمشكلة التي واجهتك ونشكر لك ملاحظاتك لمساعدتك يرجى مشاركتنا تفاصيل المشكلة التي واجهتك عبر الرابط https://anb.tw/3Vpq1cv شكرا لزيارتك.	2022-12-11 23:00:43	3	ar	us		1	ar	application authenticate device hope solve problem thank	Neutral	0	1	0
Google Play Store	5bed120e-251e-46cd-974e-33f0f941c256	For four days, I have been trying to recharge my mobile credit, and every time I receive an error in the system. The application is bad, and the bank is even worse.	راس مال	2022-10-31 14:37:16	نعتذر للمشكلة التي واجهتك ونشكر لك ملاحظاتك لمساعدتك يرجى مشاركتنا تفاصيل المشكلة التي واجهتك عبر الرابط https://anb.tw/3Vpq1cv شكرا لزيارتك.	2022-12-11 23:02:51	0	ar	us		2	ar	four days try recharge mobile credit every time receive error system application bad bank even bad	Negative	1	1	0
Google Play Store	ba7f7161-f235-4205-81ec-df06924d7c2c	The worst banking application ever, I don't know if this is an Arab bank or a fake bank 😂	Nassser Ali	2022-10-31 04:57:37	نعتذر للمشكلة التي واجهتك ونشكر لك ملاحظاتك لمساعدتك يرجى مشاركتنا تفاصيل المشكلة التي واجهتك عبر الرابط https://anb.tw/3Vpq1cv شكرا لزيارتك.	2022-12-11 23:03:00	0	ar	us		1	ar	bad bank application ever dont know arab bank fake bank	Negative	1	0	0
Google Play Store	a8a2b32f-3769-4dd2-8e14-3fab9242343e	The bank ranks second to last in terms of service quality. Only Al-Riyadh Bank is worse than it.	Saud Gadrah	2022-10-30 10:40:31	نعتذر للمشكلة التي واجهتك ونشكر لك ملاحظاتك لمساعدتك يرجى مشاركتنا تفاصيل المشكلة التي واجهتك عبر الرابط https://anb.tw/3Vpq1cv شكرا لزيارتك.	2022-12-11 23:03:45	0	ar	us		1	ar	bank rank second last term service quality alriyadh bank bad	Negative	1	0	0
Google Play Store	c65a8a4c-986b-4c35-b494-bab8fff837ec	Unnecessary complications and customer migration to another bank, including retirees.	عبدالرحمن محمد	2022-10-26 06:34:08			1	ar	us		1	ar	unnecessary complications customer migration another bank include retire	Negative	1	1	0
Google Play Store	7322af84-bc3a-4d59-8edf-cc71ace263a9	The access to it is constantly hindered due to the bank's lack of confidence in its security measures, which causes it to close access to the application.	asser alyosef	2022-10-25 15:19:40			17	ar	us		1	ar	access constantly hind due bank lack confidence security measure cause close access application	Negative	1	1	0
Google Play Store	c91dea05-9859-4fae-ac88-b6220ef992b5	The application is not working, there appears to be a problem with the system for a while.	قبعة صوف	2022-10-23 08:59:43			1	ar	us		1	ar	application work appear problem system	Negative	0	1	0
Google Play Store	43664367-5f02-40e6-ab3f-753a171410f9	The customer service number in the application is not working.	mahmoud mamdouh	2022-10-22 15:38:57			1	ar	us		1	ar	customer service number application work	Negative	0	1	0
Google Play Store	6262e159-cac7-4ee7-9619-437055e95a85	Does the new update require a call from the bank to register the phone?	2023-01-02 00:00:00	2022-10-21 19:32:42			1	ar	us		1	ar	new update require call bank register phone	Neutral	1	1	0
Google Play Store	967c479a-03ea-4ce0-aade-0c47ede9fedd	It has become not good in the latest update.	امجد بن محمد	2022-10-21 05:26:39			0	ar	us		3	ar	become good late update	Negative	0	0	0
Google Play Store	e24e96e4-91ff-46cd-8719-a7fa2695323f	It also needs a stronger integration in its products and operations that must give Arab National Bank the advantage of annual accounts and support its balance with pure government diversity which made the end in Arab Bank as a base and additions, not organized more in terms of unusual product diversity. Greetings to you, the trusted nations, even if those systems did not save money, they do not a…	Dafer Alshahrani	2022-10-19 19:52:41			0	ar	us		3	ar	also need strong integration products operations must give arab national bank advantage annual account support balance pure government diversity make end arab bank base additions organize term unusual product diversity greetings trust nations even systems save money advertise extravagant expense drain plan association end prevail image rest associations stun number profit expansions publications …	Neutral	1	0	0
Google Play Store	ebcc8a97-af93-4f9b-a6af-caecc2466fa0	Very very very bad application.	Diaa Ajlouni	2022-10-19 19:01:05			2	ar	us		1	ar	bad application	Negative	1	0	0
Google Play Store	ca1ca635-c240-4925-89a5-e4f6d95a3e40	Very bad, after the update, it doesn't open. It asks for a connection, and when I connect, it asks for entering the 16 numbers. After entering them, it asks for the password, and when I enter it, it says error, etc.	ليث العبدالله	2022-10-19 17:30:52			4	ar	us		1	ar	bad update doesnt open ask connection connect ask enter number enter ask password enter say error etc	Negative	1	1	0
Google Play Store	05233a1b-a3d4-4c85-ac62-7bc15b22ebef	very good	Msafr Almsafr	2022-10-19 01:43:16			0	ar	us		1	ar	good	Positive	0	0	0
Google Play Store	dcbee49e-2917-4353-8473-06fac131f2f6	Excellent and very beautiful, Abu Noorah.	mohmmed Jafrri	2022-10-18 20:10:17			0	ar	us		5	ar	excellent beautiful abu noorah	Positive	0	0	0
Google Play Store	1ad793e9-951b-48c6-b096-9371f2bd786d	Very bad, it opens with difficulty and you cannot find a debit card in it. It says that you don't have a card, although the card is activated and you are using the old version which was much better. Unfortunately, a solution must be found.	Said Mousa	2022-10-18 12:52:27			3	ar	us		1	ar	bad open difficulty find debit card say dont card although card activate use old version much good unfortunately solution must find	Negative	1	1	0
Google Play Store	28bd43d2-4b53-47e1-8839-cf5286da345d	It doesn't work. When I try to register, it says error. Please solve the problem.	بشار قاسو	2022-10-18 12:25:12			0	ar	us		1	ar	doesnt work try register say error please solve problem	Negative	0	1	0
Google Play Store	893fbe41-2c8b-4093-8a74-cd00eae0c48c	The old application is excellent but the new one does not open. Please help us.	Abo nasser	2022-10-18 06:07:48			2	ar	us		5	ar	old application excellent new one open please help us	Negative	1	1	0
Google Play Store	54f8b3bb-e3d2-42ab-be61-5d60ca490e6e	Very bad, it doesn't work.	عبدالله العلباني	2022-10-18 05:40:08			3	ar	us		1	ar	bad doesnt work	Negative	1	1	0
Google Play Store	ffcf30dc-f2cd-423a-973a-0f00e91ce994	The update is bad and not working.	OMAR ALHARBI	2022-10-17 03:00:46			0	ar	us		1	ar	update bad work	Negative	1	1	0
Google Play Store	bf4173af-7d54-4f6b-86e6-a7181c67fe93	They don't open for the bank.	ميمي علي	2022-10-15 15:08:22			1	ar	us		1	ar	dont open bank	Neutral	0	1	0
Google Play Store	abe6ca39-8033-48ee-9717-64e7f4a79866	Very bad, it is very slow and does not open the old update. It is easier than this... Best regards and appreciation to you.	alabde abod	2022-10-15 13:26:27			23	ar	us		1	ar	bad slow open old update easy best regard appreciation	Negative	1	0	1
Google Play Store	c20a4b34-b585-41ff-8133-9c28d9ab3ed1	Excellent and distinctive website.	Quiet Dawn	2022-10-13 08:10:13			1	ar	us		5	ar	excellent distinctive website	Positive	0	0	0
Google Play Store	301069d7-efbd-4ccc-8bbe-a72f0a503dfe	done	Khaled Hussein	2022-10-12 05:34:19			0	ar	us		5	ar	do	Positive	0	1	0
Google Play Store	0a4c406a-f81d-4eda-9e48-5b072c710286	Very good for us, I love this.	FAISAL	2022-10-12 03:52:26			0	ar	us		5	ar	good us love	Positive	0	0	0
Google Play Store	5f322189-c056-46ba-958f-b0a74be3c684	I will not enter the worst bank for an hour.	عبدالرحمن هشام حمزاوي	2022-10-11 18:11:18			1	ar	us		1	ar	enter bad bank hour	Negative	1	0	0
Google Play Store	d828d5b2-8a43-4b74-9b34-7cd241ac6146	The services of Arab Bank are excellent. May God reward you for the good. The application deserves a million stars. May God bless you.	ابو محمد ومؤمن سامي 1212	2022-10-11 04:53:56			0	ar	us		5	ar	service arab bank excellent may god reward good application deserve million star may god bless	Positive	1	0	0
Google Play Store	754336a2-637e-4f62-a354-26870ca6f3e2	Since I am a customer of this bank, I consider it one of the worst banks in Saudi Arabia in all aspects, whether in terms of banking services or the behavior of the employees, who are in need of training courses in dealing with customers. Additionally, they lack self-service options.	ابو مشعل	2022-10-10 12:17:36			0	ar	us		1	ar	since customer bank consider one bad bank saudi arabia aspects whether term bank service behavior employees need train course deal customers additionally lack selfservice options	Negative	1	0	0
Google Play Store	310d4294-8536-4bfa-adb4-71b2b28b4f77	Very, very good.	Mohamed Rabie	2022-10-07 18:27:12			0	ar	us		4	ar	good	Positive	0	0	0
Google Play Store	366bf212-17cc-411a-b9f5-74d800480ae8	Against me is the opposite and at a speed of 100, especially the main branch, Samtah.	Sultana Sa	2022-10-06 09:08:37			0	ar	us		3	ar	opposite speed especially main branch samtah	Negative	1	0	0
Google Play Store	b2b2d25a-c324-4975-8bef-ee8ec5d3e867	For a while now, the application has not been working and I called the support line but didn't benefit/help.	alwaheed1945@gmail.com smsb1945	2022-10-05 15:32:43			22	ar	us		1	ar	application work call support line didnt benefithelp	Negative	0	1	0
Google Play Store	015ab88a-2a92-40a6-9902-b699b7395db2	Beautiful application	المعز الاعسرر	2022-10-04 11:27:55			0	ar	us		5	ar	beautiful application	Positive	0	0	0
Google Play Store	2ca88cbd-9dcd-4785-957f-5a6fa351d355	The new update is very bad, when changing the password for the application, it did not succeed despite completing the process successfully.	صفوان الغنام	2022-10-04 07:46:06			10	ar	us		3	ar	new update bad change password application succeed despite complete process successfully	Negative	1	1	0
Google Play Store	4ccb3a0e-b25e-4b35-b287-e287faed81fc	The new update is very bad and the formatting is extremely poor.	دام عزك يا وطن	2022-10-03 19:48:40			1	ar	us		1	ar	new update bad format extremely poor	Negative	1	0	0
Google Play Store	2ee79a64-e865-4fb2-a11d-0cc4aa79cd48	Now the service has improved, God willing we say for the better.	عبدالرحمن الحربي	2022-10-02 14:42:33			0	ar	us		4	ar	service improve god will say good	Positive	1	0	0
Google Play Store	294b25d6-79d6-41d3-961d-4987b3a517e0	I like about Arab Bank the ease of dealing and the high ethics of all employees. I thank them, but there is a note of the lack of ATMs in many neighborhoods.	ابو عمر الزهراني	2022-10-02 11:16:10			2	ar	us		5	ar	like arab bank ease deal high ethics employees thank note lack atms many neighborhoods	Positive	1	0	0
Google Play Store	5decd261-d5af-458e-8379-42950780fb4b	They force you to download the program in order to add a beneficiary.	Mohammed Dawood	2022-09-30 15:23:59			0	ar	us		1	ar	force download program order add beneficiary	Neutral	0	1	0
Google Play Store	167f8292-619f-47ad-bcb7-f3154df4ed1a	Thank you, but why doesn't the name of the person I'm transferring to appear?	ابو فزاع المطيري	2022-09-27 22:23:20			0	ar	us		5	ar	thank doesnt name person im transfer appear	Neutral	0	1	0
Google Play Store	33c9950d-597b-4479-8fef-8852e52a36d9	"the worst application, it always crashes and doesn't convert anything. My advice is for no one to open an account on it."	Mishary	2022-09-27 18:19:39			0	ar	us		1	ar	bad application always crash doesnt convert anything advice one open account	Negative	1	1	1
Google Play Store	7749dfb0-da0a-470d-b9ee-6e891ad86bca	Filthy	مفلح العنزي	2022-09-25 21:51:49			0	ar	us		1	ar	filthy	Negative	1	0	0
Google Play Store	556aa382-a0a1-47e9-8377-8aaed60aeda9	A good and easy application for paying bills and making transfers.	يوسف العيسى	2022-09-25 16:28:10			11	ar	us		4	ar	good easy application pay bill make transfer	Positive	0	1	0
Google Play Store	e9f0de7f-ceac-4883-8a68-5cfcf05ca7cc	The new update is very bad. You can't navigate and it doesn't perform any tasks. Revert back to the old version.	محب آل البيت	2022-09-25 03:10:54			26	ar	us		1	ar	new update bad cant navigate doesnt perform task revert back old version	Negative	1	1	0
Google Play Store	c210efcb-0244-4731-8641-2f78dea00bbe	Excellent and very wonderful.	هادي جديبا	2022-09-22 21:50:01			0	ar	us		5	ar	excellent wonderful	Positive	0	0	0
Google Play Store	a3e33b97-fead-4963-9b45-38d20958a886	"High quality is possible."	عماش الرقعي	2022-08-28 19:40:45	عميلنا العزيز شكرا لثقتك وتعاملك مع البنك العربي الوطني، نتطلع دائماً الى تقديم الافضل لكم مع تحيات فريق دعم العربي نت والعربي موبايل	2022-09-29 12:03:40	0	ar	us		5	ar	high quality possible	Positive	0	0	0
Google Play Store	f2833796-d672-4e6c-8e66-1543c3edb4be	Deserves 5 stars.	ج. الشمري	2022-08-28 16:35:11	عميلنا العزيز شكرا لثقتك وتعاملك مع البنك العربي الوطني، نتطلع دائماً الى تقديم الافضل لكم مع تحيات فريق دعم العربي نت والعربي موبايل	2022-09-29 12:03:58	0	ar	us		5	ar	deserve star	Positive	1	0	0
Google Play Store	0acd83cd-a9b3-4306-a192-ad1c85ce48cc	There is a problem with the application. I forgot the username and password, and it only sends me a notification word without the username. There is a problem, please solve it.	برامج سوفت	2022-08-28 14:13:37	عميلنا العزيز شكرا لتعاملك مع البنك العربي الوطني، لمساعدتك على حل المشكلة التي تواجهك، الرجاء الاتصال على هاتف العربي، خدمات الحسابات ومن ثم الضغط على خيار رقم 5 خدمات العربي نت والعربي موبايل. من داخل المملكة / 8001244040 من خارج المملكة / 966112127555+ مع تحيات فريق دعم العربي نت والعربي موبايل	2022-09-29 12:04:22	1	ar	us		1	ar	problem application forget username password send notification word without username problem please solve	Negative	0	1	0
Google Play Store	05829b86-c69f-4da4-9e9c-86bb38b061bf	Splendor/brilliance	شمس الاصيل	2022-08-27 18:14:35	عميلنا العزيز شكرا لثقتك وتعاملك مع البنك العربي الوطني، نتطلع دائماً الى تقديم الافضل لكم مع تحيات فريق دعم العربي نت والعربي موبايل	2022-09-29 12:04:36	0	ar	us		5	ar	splendorbrilliance	Positive	1	0	0
Google Play Store	56afa725-05ae-4013-966d-c43c3d1c0369	Arabi Bank has excellent service and I have been dealing with them for 30 years and I am completely satisfied.	Gll Uyo	2022-08-25 10:19:52	عميلنا العزيز شكرا لثقتك وتعاملك مع البنك العربي الوطني، نتطلع دائماً الى تقديم الافضل لكم مع تحيات فريق دعم العربي نت والعربي موبايل	2022-09-29 12:05:28	0	ar	us		5	ar	arabi bank excellent service deal years completely satisfy	Positive	0	0	0
Google Play Store	5bfefc74-af1e-4ff3-9ce9-4f5d7dd7213e	Very good, but it would be great if the verification messages could be allowed automatically without the need for customer selection or fingerprint. Thank you.	ابوسعد محمد	2022-08-25 08:27:53			1	ar	us		4	ar	good would great verification message could allow automatically without need customer selection fingerprint thank	Positive	0	1	0
Google Play Store	c57576a0-d6a6-4745-8c2d-bb84b2b5d6b5	A very easy and wonderful application.	عبدالمطلوب الهاج	2022-08-25 06:32:19			0	ar	us		5	ar	easy wonderful application	Positive	0	0	0
Google Play Store	40709f16-b173-4590-a515-5d9d86b93a02	Excellent, very advanced and efficient.	TURKE almalki	2022-08-25 00:42:17			0	ar	us		5	ar	excellent advance efficient	Positive	0	0	0
Google Play Store	61212744-cee0-48e3-a36f-e5b235cbb39a	Very nice	أحمدعبده الكربدي	2022-08-24 21:38:50			0	ar	us		5	ar	nice	Positive	0	0	0
Google Play Store	6636664a-5297-4b20-9cad-3de9574b32b1	The best bank for fast transfers to Sudan.	حافظ ابوبكر محمد علي	2022-08-24 19:19:47			0	ar	us		5	ar	best bank fast transfer sudan	Positive	0	0	0
Google Play Store	c03e4059-0f0a-456a-8fd1-8c47d6bd7e5d	Beautiful, easy, and fast services at the same time. Especially bill payment. Excellent service, above and beyond. May you be blessed.	عقيل الغامدي	2022-08-24 17:58:00			7	ar	us		5	ar	beautiful easy fast service time especially bill payment excellent service beyond may bless	Positive	0	0	0
Google Play Store	cbb4cb2d-1e8c-40f2-8a4f-46a1e220aef0	Excellent and very useful application.	المجرشي جابر (ابو زياد)	2022-08-24 17:45:36			0	ar	us		5	ar	excellent useful application	Positive	0	0	0
Google Play Store	f313fe36-f084-45e2-b4d7-8933f92bf588	Honestly, it is a distinguished bank with excellent service.	Muhammed Algribi	2022-08-24 17:39:47			0	ar	us		5	ar	honestly distinguish bank excellent service	Positive	1	0	0
Google Play Store	a3da3934-3081-4113-a910-26cef755dfb1	Splendor	Ibrahim Tamimi	2022-08-24 05:14:38			0	ar	us		5	ar	splendor	Positive	0	0	0
Google Play Store	bc5c17c0-dd6b-437d-97cc-a38208323fed	To be honest, the banking services are excellent and unbeatable.	saleh alharthi	2022-08-22 10:25:39			0	ar	us		5	ar	honest bank service excellent unbeatable	Positive	1	0	0
Google Play Store	abf47355-2cc8-430e-bde0-2a1b53cfd76c	This app has really exhausted me. It's been over two months and it doesn't open for me, and the problem is that my salary, account, and loans are all linked to it, and I haven't found a solution to the problem of syncing my Android phone with their app updates. May God help me, and if anyone has a solution, please let me know. Thank you.	Mr. Hatim	2022-08-20 14:03:10	عميلنا العزيز شكرا لتعاملك مع البنك العربي الوطني، لمساعدتك على حل المشكلة التي تواجهك، الرجاء الاتصال على هاتف العربي، خدمات الحسابات ومن ثم الضغط على خيار رقم 5 خدمات العربي نت والعربي موبايل. من داخل المملكة / 8001244040 من خارج المملكة / 966112127555+ مع تحيات فريق دعم العربي نت والعربي موبايل	2022-09-29 12:16:30	1	ar	us		1	ar	app really exhaust two months doesnt open problem salary account loan link havent find solution problem sync android phone app update may god help anyone solution please let know thank	Negative	0	1	0
Google Play Store	9a7ea2e3-5df1-4643-b919-b4747ccaa14b	Honestly, the service of Arab Bank is very poor in online services. In everything, adding a beneficiary in settling government services does not appear, neither the ID number nor the car's serial number. The account statement does not show the inquiry process regularly. Many numbers are irrelevant and have nothing to do with me or anything related to me.	hatem hassan	2022-08-19 20:49:04			2	ar	us		1	ar	honestly service arab bank poor online service everything add beneficiary settle government service appear neither id number cars serial number account statement show inquiry process regularly many number irrelevant nothing anything relate	Negative	1	1	0
Google Play Store	88da363e-ca2e-42ed-a5a6-6e83f0b51d63	SAFAf	Sgyehrbd Hdhdhdh	2022-08-19 15:11:52	عميلنا العزيز شكرا لتعاملك مع anb، نتطلع دائماً الى تقديم الافضل لكم، الرجاء تزويدنا بملاحظات على التطبيق عبر البريد الالكتروني: ebank@anb.com.sa وللمساعدة ارجوا الاتصال على هاتف العربي، خدمات الحسابات ومن ثم الضغط على خيار رقم 5 خدمات العربي نت والعربي موبايل. من داخل المملكة / 8001244040 من خارج المملكة / +966 11 212 7555	2022-10-30 08:11:14	0	ar	us		2	ar	safaf	Neutral	0	0	0
Google Play Store	34f90383-519b-416f-97d2-5ced92f900ad	More than excellent.	حمزة مغربي	2022-08-19 13:00:50			0	ar	us		5	ar	excellent	Positive	0	0	0
Google Play Store	adc824a6-0930-4fa9-bf34-24de0fac18c9	Excellent and wonderful application.	Engaaz Set	2022-08-19 05:39:49			0	ar	us		5	ar	excellent wonderful application	Positive	0	0	0
Google Play Store	6b05e74b-a7ae-4e4c-aeb3-50a4141a2b1c	the worst application after getting my information said, "Please visit the nearest branch." 😅	Saber 65gh	2022-08-18 19:54:33			0	ar	us		1	ar	bad application get information say please visit near branch	Negative	1	0	0
Google Play Store	5d8aa6dd-2f95-4894-ab7e-506849e7ea44	Very much	مشبب القحطاني	2022-08-17 08:29:05			0	ar	us		1	ar	much	Neutral	1	0	0
Google Play Store	80fe1008-39fe-4235-919d-027eb6b59201	Excellent, thank you very much to the bank for everything, dealing, and services. Everything is very sophisticated.	ناصر الاخصائي	2022-08-14 19:14:49			0	ar	us		5	ar	excellent thank much bank everything deal service everything sophisticate	Positive	0	0	0
Google Play Store	46f5fb78-4ab0-4c43-8fb6-4f691cc76750	I have dealt with Arab Bank in all of my accounts and found the best services.	Msn Msn	2022-08-14 18:16:10			0	ar	us		5	ar	deal arab bank account find best service	Positive	0	0	0
Google Play Store	be2db9a4-2f26-41ab-a15b-54fe790f651a	One of the best banking applications.	mohammad hani	2022-08-14 17:20:59			0	ar	us		5	ar	one best bank applications	Positive	0	0	0
Google Play Store	a949dbba-261c-4237-a399-d8e58acbb5b1	Very beautiful and excellent application	ahmed hamid	2022-08-14 16:55:11			0	ar	us		5	ar	beautiful excellent application	Positive	0	0	0
Google Play Store	3e8fda51-5278-4e39-b2e7-310ae152b362	If it doesn't accept your entry, it gives you a "vbn" program, and this is incorrect.	hussam hussam	2022-08-13 14:03:12			0	ar	us		1	ar	doesnt accept entry give vbn program incorrect	Negative	1	1	0
Google Play Store	f94f47d6-46d9-4681-afdd-ee81f6081c2a	Excellent, but every now and then there is an update.	Abdullah Alnajmi	2022-08-13 05:09:00			0	ar	us		5	ar	excellent every update	Positive	0	0	0
Google Play Store	12d714d1-2145-4a02-9daf-90c0783203c8	Very beautiful and fast.	talal onzy	2022-08-08 10:14:42			0	ar	us		5	ar	beautiful fast	Positive	0	0	0
Google Play Store	ea831dcd-6303-4f2b-9d40-211dd543cdc3	One of the worst banks in terms of service, lack of organization, and delaying the customer without serving them immediately.	الشيخ /حسن عبدالله عامري	2022-08-08 08:18:28			0	ar	us		1	ar	one bad bank term service lack organization delay customer without serve immediately	Negative	1	0	1
Google Play Store	1ed24c31-2f4d-41fa-a52c-9ff8fc221a43	Excellent and very sophisticated	khalil soofy	2022-08-01 11:26:24			0	ar	us		5	ar	excellent sophisticate	Positive	0	0	0
Google Play Store	c0bc2462-859f-4bbb-9e3b-43f9318e00a0	Very bad application 👎 Every day it crashes, and every Friday it locks my account at Arab Bank. I will transfer to another bank.	ms 12	2022-07-30 19:52:34			0	ar	us		1	ar	bad application every day crash every friday lock account arab bank transfer another bank	Negative	1	1	0
Google Play Store	eb3f55b5-9cd4-4d59-af83-e426a06d8fc2	It all sucks together.	محمد مناعي	2022-07-27 20:36:10			0	ar	us		1	ar	suck together	Negative	1	0	0
Google Play Store	adfd8ae6-7d58-413e-a474-7630c8eb3560	The application is not working and the error has been occurring for several hours now without being fixed.	jaber ali	2022-07-27 19:19:33			2	ar	us		1	ar	application work error occur several hours without fix	Negative	0	1	0
Google Play Store	f6a62256-98ea-459e-9199-7ecd12ff4a7c	The application shows an error message and I was unable to access my account.	أم الفاروق	2022-07-27 18:32:56			0	ar	us		1	ar	application show error message unable access account	Negative	0	1	0
Google Play Store	5e856c83-8bd3-4911-99c4-d1e357af9856	There are many problems.	Salim Shaibans	2022-07-27 18:22:09			0	ar	us		1	ar	many problems	Negative	0	1	0
Google Play Store	fc90a4ff-b681-494c-84f4-fbdccc0b3b7f	The latest update has stopped the application from functioning.	Rsh U	2022-07-27 17:40:26			0	ar	us		1	ar	late update stop application function	Negative	0	1	0
Google Play Store	56fb3424-fc53-4602-b2b8-cba17ce79765	The program is a garbage, it includes half of a star.	Mi Zo	2022-07-27 16:31:24			0	ar	us		1	ar	program garbage include half star	Negative	1	0	0
Google Play Store	77c0cb0f-eb91-4237-a1ae-622025b32247	The worst thing about the Arab Bank is its application, which needs updating and working on by a specialized party.	ابو الوليد	2022-07-27 16:14:50	عميلنا العزيز شكواك محل اهتمامنا ارجو تزويدنا بتفاصيل أكثر عن المشكلة حتى يتم توجيهها الى الجهة المعنية من خلال التواصل معنا عبر البريد الالكتروني ebank@anb.com.sa أو الاتصال على هاتف العربي. من داخل المملكة / 8001244040 +966 11 212 7555من خارج المملكة / مع تحيات فريق دعم العربي نت والعربي موبايل	2022-10-30 07:34:06	0	ar	us		3	ar	bad thing arab bank application need update work specialize party	Negative	1	1	0
Google Play Store	718cc9ec-14cc-4a31-8e49-faa4a6cfb79f	The application is not responding and is not connected.	Aboali	2022-07-27 16:02:17			0	ar	us		1	ar	application respond connect	Negative	0	1	0
Google Play Store	402695af-8477-4f31-99c2-c88258238398	"The application has become very bad, with many bugs and has become very slow. It only opens after considerable effort."	Wlid M.E.O	2022-07-27 15:45:27			1	ar	us		1	ar	application become bad many bug become slow open considerable effort	Negative	1	1	1
Google Play Store	c9522a9d-9d70-4d99-917e-af48376d9ac4	He is not working now.	Khd_alasmari	2022-07-27 15:26:14			1	ar	us		1	ar	work	Neutral	0	1	0
Google Play Store	68d2b933-c6e8-4fb7-8a56-3130f2bd8661	It should be improved and every delay should be addressed.	ابوريان الغامدي	2022-07-27 15:23:41	عميلنا العزيز شكرا لتعاملك مع anb، نتطلع دائماً الى تقديم الافضل لكم، الرجاء تزويدنا بملاحظاتك على التطبيق عبر البريد الالكتروني: ebank@anb.com.sa وللمساعدة ارجوا الاتصال على هاتف العربي، خدمات الحسابات ومن ثم الضغط على خيار رقم 5 خدمات العربي نت والعربي موبايل. من داخل المملكة / 8001244040 من خارج المملكة / +966 11 212 7555	2022-10-30 08:15:27	2	ar	us		2	ar	improve every delay address	Neutral	0	0	1
Google Play Store	266a73ef-f30b-4892-a8d7-ffcdab631255	Very slow	SYA SYA	2022-07-27 14:25:01			1	ar	us		1	ar	slow	Negative	0	0	1
Google Play Store	779c3d34-d61c-4573-b40c-6d510cdfd080	A really the worst application to be honest, it's slow and when you try to do any operation, it keeps spinning and gives you error 503, then it freezes and you can't do any operation or payment. It's not worth it and definitely not even worth one star.	Nawaf Alhothali	2022-07-27 14:02:24			1	ar	us		1	ar	really bad application honest slow try operation keep spin give error freeze cant operation payment worth definitely even worth one star	Negative	1	1	1
Google Play Store	334041b8-98b8-43d9-9875-4af6fa2a9b6c	I am very pleased if the transfer is made to my accounts.	hosin almalki	2022-07-27 14:01:09			1	ar	us		1	ar	please transfer make account	Positive	0	1	0
Google Play Store	9be3fae7-a515-4137-a161-7a156b108af4	It is not currently working.	Bandar Alrasheedi	2022-07-27 12:57:50			1	ar	us		1	ar	currently work	Negative	0	1	0
Google Play Store	5035b530-2c68-4fbd-b291-aeff2485dc03	Today, the application is bad, it doesn't open.	dafer AL QAHTANI	2022-07-27 12:56:00			1	ar	us		1	ar	today application bad doesnt open	Negative	1	1	0
Google Play Store	eedb174f-b4cc-4e11-a05b-84d79b7af6ec	The application is not working today.. It has been deleted and downloaded again in hopes that it might work, but without any luck... Please solve the problem?	نجيب القهلاني	2022-07-27 12:49:49			2	ar	us		5	ar	application work today delete download hop might work without luck please solve problem	Negative	0	1	0
Google Play Store	5544ec71-9237-48d0-a723-81dcc8ebf25b	The program was working fine, but now it doesn't open at all.	Hamed Elsayed	2022-07-27 12:11:33			1	ar	us		1	ar	program work fine doesnt open	Negative	0	1	0
Google Play Store	2c88b279-9378-4c2e-be78-7fcff8c160ed	Failing by all measures, if the salary decreases, everything shuts down.	NASSER ALSHAMMARI	2022-07-27 11:30:24			1	ar	us		1	ar	fail measure salary decrease everything shut	Negative	0	1	0
Google Play Store	17a104d3-d0e5-4d98-861d-2a31dab0bcdc	One of the worst applications, superficial and indescribably primitive. Sometimes it doesn't even work. The way to access services is not effective on the homepage. Learn from other banking applications and their ease of accessing services. For example, Al Rajhi's application, regardless of the bank, is easy and the display method is very effective. Learn, it's not a flaw, oh worst bank. Just one…	Alkumishi Alkumishi	2022-07-27 10:13:20			3	ar	us		1	ar	one bad applications superficial indescribably primitive sometimes doesnt even work way access service effective homepage learn bank applications ease access service example al rajhis application regardless bank easy display method effective learn flaw oh bad bank one star comment sake truth dont deserve ten star	Negative	1	1	0
Google Play Store	05206588-8dd7-4db6-8bd0-d5ce45a7bed3	The application is not working. It's as useless as garbage. Find a solution, oh sons of the old man, or we will close our accounts. You are the worst bank ever in terms of applications. By the way, you don't even deserve a quarter of a star, just for the review.	ابو سلطان مجرشي	2022-07-27 09:25:06			1	ar	us		1	ar	application work useless garbage find solution oh sons old man close account bad bank ever term applications way dont even deserve quarter star review	Negative	1	1	0
Google Play Store	1b209faa-353e-4441-b7e4-13f124352282	There is no good, my friend.	ططط شش	2022-07-27 09:03:37			1	ar	us		1	ar	good friend	Negative	0	0	0
Google Play Store	d62e1ab9-e2c2-4cac-b770-da5110d56149	It doesn't malfunction except on payday. Wait until the correction is made.	Hmoud AlMutiri	2022-07-27 09:01:24			2	ar	us		1	ar	doesnt malfunction except payday wait correction make	Neutral	0	1	0
Google Play Store	3c6653c3-3438-4b91-a8a7-83ffc4207fef	If it weren't for my desire to post this comment, I wouldn't have given it any star, it's been a while since it became a thumbs down. 👎👎👎	جواهر الردادي	2022-07-27 08:59:41			1	ar	us		1	ar	werent desire post comment wouldnt give star since become thumb	Negative	1	0	0
Google Play Store	c452a2bc-f2bf-4b6d-8e4a-b09a352acde1	It is not worth it and does not deserve even one star. After the update, it does not work.	هديه لك	2022-07-27 08:33:40			1	ar	us		1	ar	worth deserve even one star update work	Negative	0	0	0
Google Play Store	769bd02d-505e-4e58-936e-fb9f088de0f6	The program is not working.	قناة بن عوده الفضلي	2022-07-27 08:24:53			1	ar	us		5	ar	program work	Negative	0	1	0
Google Play Store	1b847625-1e44-4be5-a914-8e30317de68e	The application is not working, it has problems and delays.	أحمد	2022-07-27 08:19:07			2	ar	us		1	ar	application work problems delay	Negative	0	0	1
Google Play Store	3bbadb02-0771-495f-8a39-6bffe53a3a60	"Slow and not willing to open, you try to enter account information, it says error !!"	العنود الحربي	2022-07-27 07:51:32			1	ar	us		1	ar	slow will open try enter account information say error	Negative	0	1	1
Google Play Store	ba600d41-ed59-4fd0-a246-a9043648fdba	There are too many comments and it doesn't load quickly.	معجب السعد	2022-07-27 06:18:58			1	ar	us		1	ar	many comment doesnt load quickly	Negative	0	1	1
Google Play Store	d26988d2-3012-4d3f-9d18-2ada09ac8f0d	"Dear Arab Bank, recently, the application has not been working properly today and the website is very slow. Is this true?" Note: The translation is in spoken English, not written English.	Y K	2022-07-27 05:59:35			2	ar	us		1	ar	dear arab bank recently application work properly today website slow true note translation speak english write english	Negative	0	0	1
Google Play Store	19a644b4-2ccc-4b71-a7b2-500f5b7017df	Bad pay day	nasser azibi	2022-07-27 04:57:42			1	ar	us		1	ar	bad pay day	Negative	1	0	0
Google Play Store	e192c669-6253-4a81-b50b-f02866c796ac	the worstbank in every sense of the word with many justified complaints against it.	ابوخالد البشري	2022-07-27 04:41:53			1	ar	us		1	ar	worstbank every sense word many justify complaints	Negative	1	0	0
Google Play Store	2d6e49e3-01ea-450c-b077-93e86b5141fb	An application that is even better than that.	سعد سعد	2022-07-27 03:48:53			1	ar	us		5	ar	application even good	Positive	0	0	0
Google Play Store	f933358f-7345-47bc-8380-69aeab0de64b	It constantly hangs and needs an update for improvement.	عبدالله ال هديان	2022-07-27 03:43:44			2	ar	us		1	ar	constantly hang need update improvement	Negative	0	0	1
Google Play Store	e0860d11-a1fc-4b32-bd68-0766fc3b1536	Please modify the Visa payment service to be via the application.	ذاكر ال ذاكر	2022-07-27 03:38:02			0	ar	us		5	ar	please modify visa payment service via application	Neutral	0	1	0
Google Play Store	13335fec-37d0-423b-bf7d-cb71f4c3308b	I receive a message with the code 503.	سعود الدوسري	2022-07-27 03:15:54			1	ar	us		1	ar	receive message code	Neutral	0	1	0
Google Play Store	3eb8331b-9495-4fe4-b1f9-502cb9aa50d8	The dumbest bank.	FAHAD sa	2022-07-27 02:30:44			1	ar	us		1	ar	dumb bank	Negative	1	0	0
Google Play Store	62eb44ad-bb4f-491c-bc4a-ebb01c32baec	If there is a negative 10, I will add it.	عبدالمجيد ال معدي	2022-07-26 11:03:46			1	ar	us		1	ar	negative add	Neutral	1	0	0
Google Play Store	b793e667-7902-470b-bc31-89d7e5032411	Excellent, superb!	بندر بيرو	2022-07-25 10:14:16			0	ar	us		5	ar	excellent superb	Positive	0	0	0
Google Play Store	2a97491b-042a-4da1-b20f-37149a0be1f9	The "Ta'ees" application is flawed. When entering a new beneficiary with an IBAN number, it does not display the account holder's name. It is necessary to manually enter their name. When entering a new bank account beneficiary, the application should provide the full name. Please be aware of this issue to prevent name and account discrepancies. I repeat, the "Ta'ees" application needs improvement!	A Al	2022-07-22 16:42:07			3	ar	us		1	ar	taees application flaw enter new beneficiary iban number display account holders name necessary manually enter name enter new bank account beneficiary application provide full name please aware issue prevent name account discrepancies repeat taees application need improvement	Negative	0	1	0
Google Play Store	6da5faf3-1528-4fce-9946-df4cdad1b601	The truth is, the update is not working. I enter and it returns me to the login. I've been trying to log in for an hour now, without success.	نوره الجهني	2022-07-20 17:10:57			2	ar	us		2	ar	truth update work enter return login ive try log hour without success	Negative	0	1	0
Google Play Store	abd98e35-2a3e-48d5-b021-64f5f2c8a664	With all due respect to the employees of the bank, it is the worst and most corrupt bank I have ever encountered. There is no professionalism or decent treatment from the staff in dealing with the automated response. Other banks are advancing while this one is disgraceful. It is a shame to call it a bank, it is nothing more than a filthy institution. I apologize for the harsh words, but I couldn'…	محمد الحربي	2022-07-19 14:29:19			1	ar	us		1	ar	due respect employees bank bad corrupt bank ever encounter professionalism decent treatment staff deal automate response bank advance one disgraceful shame call bank nothing filthy institution apologize harsh word couldnt find good word describe bank thank	Negative	1	0	0
Google Play Store	d7e7d6cd-8474-4f66-9947-69686e3abe07	Very, very, very bad, same bank and terrible service, not even worth a star.	مشاري العزي	2022-07-12 12:39:58			1	ar	us		1	ar	bad bank terrible service even worth star	Negative	1	0	0
Google Play Store	99267dce-0ebb-45bc-bf6f-0f7e8ac73019	The application does not work sometimes; it feels like just a blank page with inactive buttons. Can you find a solution for us? Dear officials, it is not acceptable. I needed it urgently today, but unfortunately, I did not benefit from it. Today is 11/7/2022.	Anasmemo Esso	2022-07-11 12:03:25			2	ar	us		2	ar	application work sometimes feel like blank page inactive button find solution us dear officials acceptable need urgently today unfortunately benefit today	Negative	0	1	1
Google Play Store	f31b29b2-514b-41a5-814c-34ec40fb0b6f	The bank is very good and the service is top-notch.	طارق شهاب	2022-07-11 11:59:01			0	ar	us		5	ar	bank good service topnotch	Positive	0	0	0
Google Play Store	34c74695-ef22-4d95-8529-5949b3e526eb	The decision-makers at Arab National Bank, may your souls rest in peace, should join Al Ahli or Al Rajhi Bank and learn from them how to create an online banking program. After that, you can release your own program or remain without it, as you wish.	ابو عبدالله	2022-07-09 21:18:58			1	ar	us		1	ar	decisionmakers arab national bank may souls rest peace join al ahli al rajhi bank learn create online bank program release program remain without wish	Neutral	1	0	0
Google Play Store	d5d70047-efa8-4bad-8434-632dc0911f86	It's more than amazing and deserves more than five stars.	mohammed mansour	2022-07-07 22:50:50			1	ar	us		5	ar	amaze deserve five star	Positive	0	0	0
Google Play Store	da415a3f-0596-4b5d-8ad2-b91b64061981	The application has not been working like this for over a year. Please fix your program, otherwise I will switch from Arab Bank and open an account in a new bank.	سيسي ١١	2022-07-07 19:43:54			1	ar	us		1	ar	application work like year please fix program otherwise switch arab bank open account new bank	Negative	0	1	0
Google Play Store	28adde85-59f9-4224-811b-93f9849ba667	the worst application and an untrustworthy bank. I went to withdraw an amount at a gas station but unfortunately, I faced an embarrassing situation due to a problem from the bank which prevented me from withdrawing. May Allah be our judge and avenge us. May Allah not bless you and make you firewood in hell.	الوافي الحجازي	2022-07-07 09:00:16			2	ar	us		1	ar	bad application untrustworthy bank go withdraw amount gas station unfortunately face embarrass situation due problem bank prevent withdraw may allah judge avenge us may allah bless make firewood hell	Negative	1	0	0
Google Play Store	b9eb0a50-c304-4e7b-bdff-9240b629c478	Does not deserve only one star.	ايهاب	2022-07-07 02:28:55			1	ar	us		1	ar	deserve one star	Negative	0	0	0
Google Play Store	23a017a5-a41d-4b31-8b2c-d952d9c8eca1	Unfortunately, Zabaleh (a term in Arabic meaning "trash") Arab Bank and Riyadh Bank, because I downloaded their application and followed their instructions, but unfortunately at the last step, which is sending the card to the national address, it says it is not possible. I tried the method three times to make the evaluation more credible, but all attempts failed. Although Arab Bank is smoother th…	محمد Мухаммад	2022-07-06 13:30:39			1	ar	us		1	ar	unfortunately zabaleh term arabic mean trash arab bank riyadh bank download application follow instructions unfortunately last step send card national address say possible try method three time make evaluation credible attempt fail although arab bank smooth riyadh bank end result failure hope evolve like bank keep developments extent register use card without contact internet salute bank say	Negative	1	1	0
Google Play Store	7e7e1ac0-69c7-425d-bda6-7bcd04609e72	Superb	مومو	2022-07-06 11:08:48			0	ar	us		5	ar	superb	Positive	0	0	0
Google Play Store	2bfe3164-9472-467a-9564-c90bc1864631	I have tried several times to open a new account, but unfortunately there is none.	Rashad Rashad	2022-07-05 23:43:06			0	ar	us		1	ar	try several time open new account unfortunately none	Negative	0	1	0
Google Play Store	4b107946-0da0-492a-9b34-3090448ed6d3	Very	محمد محمود	2022-07-05 18:16:25			0	ar	us		5	ar		Neutral	0	0	0
Google Play Store	9ed5d7fd-7787-4f58-8bca-697d265ec8f7	The application is excellent, but I request adding the feature of deleting beneficiaries and adding the feature of adding a beneficiary by their Arabic name.	Alkebir	2022-07-05 07:37:16			1	ar	us		1	ar	application excellent request add feature delete beneficiaries add feature add beneficiary arabic name	Positive	1	1	0
Google Play Store	e6d6ab8f-d11b-4d68-9290-9337cef8e4d5	Mashallah, may Allah bless the program, it is excellent.	استغفر الله	2022-07-05 01:14:07			0	ar	us		5	ar	mashallah may allah bless program excellent	Positive	0	0	0
Google Play Store	a23644ee-a73e-4347-b6df-934496aaf5eb	After the update, there is a payment request with data that I did not enter in the transfers list. The amounts are 100 Riyals and 200 Riyals, with today's date, for a person named Gowthman R. There is a picture of the issue, please clarify.	ahmed	2022-07-04 08:02:14			0	ar	us		1	ar	update payment request data enter transfer list amount riyals riyals todays date person name gowthman r picture issue please clarify	Neutral	0	1	0
Google Play Store	83b5ca89-a5a1-406c-b893-9cb183f6cd43	May Allah bless you.	Td Hs	2022-07-02 11:37:54			1	ar	us		1	ar	may allah bless	Positive	1	0	0
Google Play Store	7a3d1e12-4158-4673-89cd-b43bb9c63d95	Excellent very very very	Mohamed Halawa	2022-06-30 07:51:35			0	ar	us		5	ar	excellent	Positive	0	0	0
Google Play Store	601aaf5b-0fe4-450b-a177-61c620c37d8e	Good morning. I want to buy a three-bedroom apartment in King Abdullah Economic City, consisting of a living room, kitchen, two bathrooms, and a second-floor lounge in Al-Bilsan. The value of the apartment is 4,050,000 riyals. I am retired, and my pension is 4,087 riyals. Is it possible for my application to be accepted through the housing program? I am Bakr Saeed Barhaim, and I have an ID number…	بكر بارحيم	2022-06-28 18:57:19	عميلنا العزيز، شكرا لاختيارك البنك العربي الوطني، يوفر البنك العربي الوطني حلول تمويل تلبي جميع احتياجات العملاء، للاستفادة من هذه الخدمات ومعرفة المزيد ، يرجى الاتصال بالرقم 8001244141	2021-10-07 15:25:44	4	ar	us		5	ar	good morning want buy threebedroom apartment king abdullah economic city consist live room kitchen two bathrooms secondfloor lounge albilsan value apartment riyals retire pension riyals possible application accept house program bakr saeed barhaim id number mobile number may allah reward best	Neutral	1	1	0
Google Play Store	41b50ed4-1487-4cc8-a1ce-95041deade65	Failure	Twaaag	2022-06-28 01:50:08			1	ar	us		1	ar	failure	Negative	0	1	0
Google Play Store	91768bf9-613d-4474-a7ca-8861c43126af	We start	ابو راكان	2022-06-27 22:19:00	عميلنا العزيز شكرا لثقتك وتعاملك مع البنك العربي الوطني، نتطلع دائماً الى تقديم الافضل لكم مع تحيات فريق دعم العربي نت والعربي موبايل	2022-10-30 07:40:44	0	ar	us		3	ar	start	Neutral	0	1	0
Google Play Store	cfdcb80a-30b9-44c7-b006-3b462e24a155	Good application	علي مباركي	2022-06-27 15:09:31			0	ar	us		5	ar	good application	Positive	0	0	0
Google Play Store	c64c6e6e-ee79-4358-b613-b889223f5cb8	The latest update is very bad. The application does not work and is very slow.	القمه	2022-06-27 07:34:55			6	ar	us		1	ar	late update bad application work slow	Negative	1	1	1
Google Play Store	420c1b99-bc07-4f49-a99e-be0803cfb82d	Rich experience, excellent application.	Ismail Abdelhai	2022-06-26 07:29:48			0	ar	us		5	ar	rich experience excellent application	Positive	0	0	0
Google Play Store	4f4334ca-1c75-45b5-a371-6e3bec96e6e2	Excellent application, mashallah.	ابو معاذ	2022-06-22 20:48:39			0	ar	us		5	ar	excellent application mashallah	Positive	0	0	0
Google Play Store	3596094d-b602-4923-9a1d-c154fcff6853	The application is not working. It has been two days and it is not opening at all.	مرام سعد	2022-06-11 05:55:16			2	ar	us		1	ar	application work two days open	Negative	0	1	0
Google Play Store	841d5e62-3994-4d5c-a5dc-7b028dfc28a3	Very, very bad application.	حمد السبيعي	2022-06-09 14:36:25			2	ar	us		1	ar	bad application	Negative	1	0	0
Google Play Store	15974ca6-3d30-4210-a347-18fd99d78800	We thank you.	همر همر	2022-06-07 12:54:57			0	ar	us		5	ar	thank	Positive	0	0	0
Google Play Store	32d7e9a2-a958-4957-ae17-1e7abb893e55	Good luck to you.	Omfasal Aserey	2022-06-01 14:44:46			0	ar	us		5	ar	good luck	Positive	0	0	0
Google Play Store	a314c794-da60-4de5-b62b-fbabb7129506	It was very good, but now it is asking me to update the application even though it doesn't need an update.	العابد الزاهد	2022-06-01 13:44:23			0	ar	us		5	ar	good ask update application even though doesnt need update	Negative	1	1	0
Google Play Store	99280d1b-4c63-4d67-84b1-e3bcb30c3aef	The application is not working/ is corrupted.	عبداللطيف	2022-05-31 21:54:56			2	ar	us		1	ar	application work corrupt	Negative	1	1	0
Google Play Store	eb593470-5e0d-4ef1-9726-8f83f02036d4	"The application is the worst and the website is even worse... When I try to sign up, I get an error message saying (Error during execution). Please shut it down, you have exhausted us at the bank, in the application, and on the website."	عادل المالكي	2022-05-31 17:12:37			15	ar	us		1	ar	application bad website even bad try sign get error message say error execution please shut exhaust us bank application website	Negative	1	1	0
Google Play Store	fe4a9348-5695-4511-86cb-e201556d067c	And how	‪abu-Mreezuq السويدي (abu.fahad)‬‏	2022-05-31 09:47:47			0	ar	us		4	ar		Neutral	0	0	0
Google Play Store	3b60fcd1-38f3-4b84-b359-a361091e1a6a	Masoud Rashid Mohammed Al-Mari	المري المري	2022-05-26 18:42:05			0	ar	us		5	ar	masoud rashid mohammed almari	Neutral	0	0	0
Google Play Store	03684e53-4ff9-4052-a18d-06121cf0d637	System freezing issues, error messages, failure to receive code messages, and lack of response to messages.	blogger now	2022-05-26 15:21:52			2	ar	us		1	ar	system freeze issue error message failure receive code message lack response message	Negative	0	1	1
Google Play Store	15b19a1e-56ce-412b-a8f3-d185cc0f1400	"Very cool application."	Mohamed Elzeny	2022-05-26 11:24:53			1	ar	us		1	ar	cool application	Positive	0	0	0
Google Play Store	cc436e8a-a80c-4e66-8929-670f0490efaa	The application is very bad and is not working.	ماجد حسن	2022-05-24 07:28:28			1	ar	us		1	ar	application bad work	Negative	1	1	0
Google Play Store	bfe5c1a3-890a-47bf-b966-d2b6fcf1ac33	May Allah give you wellness/health.	Abbas Ageel	2022-05-16 15:00:27	عميلنا العزيز شكرا لثقتك وتعاملك مع البنك العربي الوطني، نتطلع دائماً الى تقديم الافضل لكم مع تحيات فريق دعم العربي نت والعربي موبايل	2022-05-30 09:08:33	0	ar	us		5	ar	may allah give wellnesshealth	Positive	1	0	0
Google Play Store	e30b9208-47d2-4c7a-ad13-33d5bfd3bee4	You have exhausted the elderly, may God be our provider and advocate. There are many updates and congestion at the entrances, with arrogant employees, and now the application is not working. May God protect Al Rajhi Bank and those who work in it.	Adwaa	2022-05-16 02:42:59			3	ar	us		1	ar	exhaust elderly may god provider advocate many update congestion entrance arrogant employees application work may god protect al rajhi bank work	Negative	1	1	0
Google Play Store	7025fafe-fdf3-4e6c-b212-9dd3e4d52054	Very excellent. Its only problem is not saving the username and password when using the fingerprint.	أبو طارق عاتي	2022-05-15 18:24:33	عميلنا العزيز شكرا لثقتك وتعاملك مع البنك العربي الوطني، نتطلع دائماً الى تقديم الافضل لكم مع تحيات فريق دعم العربي نت والعربي موبايل	2022-05-30 09:11:02	4	ar	us		5	ar	excellent problem save username password use fingerprint	Positive	1	1	0
Google Play Store	8329e54e-6a9b-43ee-a808-b62acc11d2a4	I didn't understand the username. Enter everything including the password, but it always shows an error. What should I write then?	SHAHEN GAMER شاهين قيمر	2022-05-14 14:50:00			0	ar	us		2	ar	didnt understand username enter everything include password always show error write	Negative	0	1	0
Google Play Store	8529f946-b5d2-4e2b-bbc0-74944dacc832	Why isn't there an option to add an account for the subsidiary? Please reply.	الطائر المسافر	2022-05-12 02:58:30			0	ar	us		1	ar	isnt option add account subsidiary please reply	Neutral	0	1	0
Google Play Store	5946038d-78e3-419b-ba49-f235876af66d	One of the worst banking applications, honestly. The program is very heavy, and I've been trying for an hour to log in, but the authentication number doesn't show up in the messages. It's frustrating me and wasting my time as I keep trying to log in, and I'm still trying... If you don't have someone competent to develop a program as efficient as Al-Rajhi or Al-Ahli, then just cancel the applicati…	عطيه المالكي	2022-05-11 17:34:28			9	ar	us		1	ar	one bad bank applications honestly program heavy ive try hour log authentication number doesnt show message frustrate waste time keep try log im still try dont someone competent develop program efficient alrajhi alahli cancel application altogether	Negative	1	1	1
Google Play Store	c1b61362-f69c-4e33-b1da-b6b801489f64	Easy to use, fast, and has minimal lag.	Abdullah Alkhaibary	2022-05-10 17:30:20	عميلنا العزيز شكرا لثقتك وتعاملك مع البنك العربي الوطني، نتطلع دائماً الى تقديم الافضل لكم مع تحيات فريق دعم العربي نت والعربي موبايل	2022-05-12 10:15:16	2	ar	us		5	ar	easy use fast minimal lag	Positive	0	0	0
Google Play Store	30f9b346-8456-4c3d-8edd-01c3463f4724	The application is not working for me, when I enter the application, I do not receive a text message for verification code.	ابو ابراهيم	2022-05-10 06:11:36			1	ar	us		5	ar	application work enter application receive text message verification code	Negative	0	1	0
Google Play Store	b8e603e7-05dc-4c9b-bebc-1840fd322259	Seer application	ماجد المحيسن	2022-05-10 02:00:40			0	ar	us		1	ar	seer application	Neutral	1	0	0
Google Play Store	0b936d14-fb4d-4818-be15-5243720c0a10	Refined	Mohamednoor Turki	2022-05-09 21:25:00	عميلنا العزيز شكرا لثقتك وتعاملك مع البنك العربي الوطني، نتطلع دائماً الى تقديم الافضل لكم مع تحيات فريق دعم العربي نت والعربي موبايل	2022-05-12 10:15:49	0	ar	us		5	ar	refine	Neutral	0	0	0
Google Play Store	7a91f016-eee5-4668-bce8-04dd65579476	Excellent application that works efficiently and is easy to use.	ابوفهداحمد كعبي	2022-05-09 21:02:32	عميلنا العزيز شكرا لثقتك وتعاملك مع البنك العربي الوطني، نتطلع دائماً الى تقديم الافضل لكم مع تحيات فريق دعم العربي نت والعربي موبايل	2022-05-12 10:15:58	0	ar	us		5	ar	excellent application work efficiently easy use	Positive	0	0	0
Google Play Store	05661be1-55bf-45c3-860b-762c2cc78ac4	"It is a very bad application and I do not recommend opening an account with them, I swear by Allah, Al Rajhi Bank is better."	محمد عسيري	2022-05-09 18:06:38			2	ar	us		1	ar	bad application recommend open account swear allah al rajhi bank good	Negative	1	0	0
Google Play Store	94a6b114-8269-4fe2-8f45-91747e7a5d53	After updating and improving the website, its use has become acceptable.	نعيم الدبلوماســي	2022-05-09 17:28:01			0	ar	us		4	ar	update improve website use become acceptable	Positive	1	0	0
Google Play Store	324467d1-9dda-4f8e-a394-e0f922a5e332	Easy to deal with, meets all my fast remittance needs.	سعود مطار عميري	2022-05-09 14:33:13	عميلنا العزيز شكرا لثقتك وتعاملك مع البنك العربي الوطني، نتطلع دائماً الى تقديم الافضل لكم مع تحيات فريق دعم العربي نت والعربي موبايل	2022-05-12 10:16:37	2	ar	us		5	ar	easy deal meet fast remittance need	Positive	0	0	0
Google Play Store	24f98af7-294e-4e1f-98a1-ae6ecf9485eb	An excellent experience, the website offers all services for Arab Bank customers. Try it, download the application, and login, and you will see for yourself the numerous services provided by the application.	Ezzat Abdul Hadi	2022-05-09 12:42:58	عميلنا العزيز شكرا لثقتك وتعاملك مع البنك العربي الوطني، نتطلع دائماً الى تقديم الافضل لكم مع تحيات فريق دعم العربي نت والعربي موبايل	2022-05-12 10:17:42	0	ar	us		5	ar	excellent experience website offer service arab bank customers try download application login see numerous service provide application	Positive	0	1	0
Google Play Store	ae400c2e-fc53-4020-8ef2-fa004358cafe	Excellent very very much, God willing.	عصام التجانى (ابو مصعب)	2022-05-09 10:09:11	عميلنا العزيز شكرا لثقتك وتعاملك مع البنك العربي الوطني، نتطلع دائماً الى تقديم الافضل لكم مع تحيات فريق دعم العربي نت والعربي موبايل	2022-05-12 10:18:23	0	ar	us		5	ar	excellent much god will	Positive	0	0	0
Google Play Store	7201ffff-601e-4114-b090-859d69ef7d1f	A successful application by all standards that does not require any effort.	عويبد السلمي	2022-05-09 10:04:21	عميلنا العزيز شكرا لثقتك وتعاملك مع البنك العربي الوطني، نتطلع دائماً الى تقديم الافضل لكم مع تحيات فريق دعم العربي نت والعربي موبايل	2022-05-12 10:18:52	0	ar	us		5	ar	successful application standards require effort	Positive	1	0	0
Google Play Store	b91acd37-b449-4c45-8789-4d18f1ba90a1	Carelessness in accessing and browsing.	Hamad Al-Jasser	2022-05-09 09:49:25	عميلنا العزيز شكرا لثقتك وتعاملك مع البنك العربي الوطني، نتطلع دائماً الى تقديم الافضل لكم مع تحيات فريق دعم العربي نت والعربي موبايل	2022-05-12 10:20:45	0	ar	us		5	ar	carelessness access browse	Negative	1	0	0
Google Play Store	8b39b441-dedf-490f-a565-c221e3ce71e0	Excellent, deserves more than 5 stars.	عبدالله عبدالله	2022-05-09 09:47:55	عميلنا العزيز شكرا لثقتك وتعاملك مع البنك العربي الوطني، نتطلع دائماً الى تقديم الافضل لكم مع تحيات فريق دعم العربي نت والعربي موبايل	2022-05-12 10:24:31	0	ar	us		5	ar	excellent deserve star	Positive	0	0	0
Google Play Store	0c770541-8387-489e-9bbc-37e1f9ff0aa0	the best	حسن الزهراني	2022-05-09 09:45:33	عميلنا العزيز شكرا لثقتك وتعاملك مع البنك العربي الوطني، نتطلع دائماً الى تقديم الافضل لكم مع تحيات فريق دعم العربي نت والعربي موبايل	2022-05-12 10:24:44	0	ar	us		5	ar	best	Positive	0	0	0
Google Play Store	4caeb287-45d3-4493-b30c-be5708b28c37	The application is excellent.	ابويوسف الفيفي	2022-05-09 09:43:36	عميلنا العزيز شكرا لثقتك وتعاملك مع البنك العربي الوطني، نتطلع دائماً الى تقديم الافضل لكم مع تحيات فريق دعم العربي نت والعربي موبايل	2022-05-12 10:24:56	1	ar	us		5	ar	application excellent	Positive	0	0	0
Google Play Store	2fd14d0a-5556-4c24-9f6e-f0c96d9ba447	Excellent, instead of going to the branch, I do all my financial transactions while I am at home.	Amn Amn	2022-05-09 09:38:49	عميلنا العزيز شكرا لثقتك وتعاملك مع البنك العربي الوطني، نتطلع دائماً الى تقديم الافضل لكم مع تحيات فريق دعم العربي نت والعربي موبايل	2022-05-12 10:25:07	0	ar	us		3	ar	excellent instead go branch financial transactions home	Positive	1	0	0
Google Play Store	8921cfaa-2b97-4cdc-ba23-e567b61fd49d	After the experience, how can something I haven't used be evaluated? Thank you.	Bandar Alrefe	2022-05-09 09:36:30			0	ar	us		3	ar	experience something havent use evaluate thank	Neutral	1	0	0
Google Play Store	e2642a24-adae-40b9-8b5b-11455307444a	The best bank for international transfers is very fast and has lower cost.	عمارعوض الحسين	2022-05-09 09:09:39	عميلنا العزيز شكرا لثقتك وتعاملك مع البنك العربي الوطني، نتطلع دائماً الى تقديم الافضل لكم مع تحيات فريق دعم العربي نت والعربي موبايل	2022-05-12 10:25:49	0	ar	us		5	ar	best bank international transfer fast low cost	Positive	0	0	0
Google Play Store	605098a7-0b18-47a8-b6a2-82498dc326f2	The current version of the application is much better than the previous one.	صالح ابو ماجد	2022-05-09 09:07:10			6	ar	us		4	ar	current version application much good previous one	Positive	1	0	0
Google Play Store	7d200c4c-63bd-446f-8829-221cb5c75bda	Flexible application	علي بن مردح البكري	2022-05-09 09:02:48	عميلنا العزيز شكرا لثقتك وتعاملك مع البنك العربي الوطني، نتطلع دائماً الى تقديم الافضل لكم مع تحيات فريق دعم العربي نت والعربي موبايل	2022-05-12 10:26:08	0	ar	us		5	ar	flexible application	Neutral	1	0	0
Google Play Store	6015b984-ca33-4a15-a49a-9e5b46bcf8eb	Very convenient application.	amer 67033	2022-05-08 11:38:42	عميلنا العزيز شكرا لثقتك وتعاملك مع البنك العربي الوطني، نتطلع دائماً الى تقديم الافضل لكم مع تحيات فريق دعم العربي نت والعربي موبايل	2022-05-30 09:12:42	0	ar	us		5	ar	convenient application	Positive	0	0	0
Google Play Store	2fd5babb-4f3e-4636-9c2f-eeecef720cf3	By God Almighty, you are a disaster and failures during the holiday. No transfers, no bill payments, etc. I swear to God, may He take you all away.	Najib Hawachi	2022-05-01 12:04:26			1	ar	us		1	ar	god almighty disaster failures holiday transfer bill payments etc swear god may take away	Negative	1	1	0
Google Play Store	18320e46-ab61-4a2c-9070-5b0989a31c28	More than wonderful.	Fahad 777 fahad	2022-05-01 02:22:28	عميلنا العزيز شكرا لثقتك وتعاملك مع البنك العربي الوطني، نتطلع دائماً الى تقديم الافضل لكم مع تحيات فريق دعم العربي نت والعربي موبايل	2022-05-12 10:39:44	0	ar	us		5	ar	wonderful	Positive	0	0	0
Google Play Store	5224b48f-09c6-4dea-8da9-cec7a514d68e	Easy to use, may Allah reward you with goodness.	امل احمد	2022-04-29 04:07:42	عميلنا العزيز شكرا لثقتك وتعاملك مع البنك العربي الوطني، نتطلع دائماً الى تقديم الافضل لكم مع تحيات فريق دعم العربي نت والعربي موبايل	2022-05-12 10:40:17	0	ar	us		5	ar	easy use may allah reward goodness	Positive	1	0	0
Google Play Store	2c4ad5c6-94c2-4ab6-a2ee-0745656d3c37	The program is not functioning and it refuses to login, without a solution.	mohammed SAAD do	2022-04-28 16:59:36			2	ar	us		1	ar	program function refuse login without solution	Negative	0	1	0
Google Play Store	7396aef2-63f4-47d1-bd19-bc603cf4dc84	The services are not good.. and the updates come late.	بكلمآتى أمير	2022-04-28 14:26:17			3	ar	us		1	ar	service good update come late	Negative	1	0	0
Google Play Store	04859bde-35da-4051-b781-9d4478e2f6ee	Why does he request important information and not complete the task? The bank bears legal responsibility if those information are used in an unlawful manner.	Sraj Almaliki	2022-04-28 03:25:56			2	ar	us		1	ar	request important information complete task bank bear legal responsibility information use unlawful manner	Negative	1	0	0
Google Play Store	30f138ec-0122-4279-8a3a-b30921c23d30	"He's fine, may God make him financially well off hahahaha 😂😂"	سعيد الشهراني	2022-04-27 20:17:31			0	ar	us		5	ar	hes fine may god make financially well hahahaha	Positive	0	0	0
Google Play Store	b1e537b3-028a-4c90-b376-a0c346b8e3c6	Extremely excellent	ماجد العتيبي	2022-04-27 18:23:27	عميلنا العزيز شكرا لثقتك وتعاملك مع البنك العربي الوطني، نتطلع دائماً الى تقديم الافضل لكم مع تحيات فريق دعم العربي نت والعربي موبايل	2022-05-12 10:40:55	0	ar	us		5	ar	extremely excellent	Positive	0	0	0
Google Play Store	5072df1c-8fe6-4de7-8d65-e96148311ee1	It is still working well until now.	حسن حلل	2022-04-27 00:06:34	عميلنا العزيز شكرا لثقتك وتعاملك مع البنك العربي الوطني، نتطلع دائماً الى تقديم الافضل لكم مع تحيات فريق دعم العربي نت والعربي موبايل	2022-05-12 10:41:15	0	ar	us		5	ar	still work well	Positive	0	1	0
Google Play Store	54e30079-6957-435b-9c94-673f8ebd7a48	What do you do with me?	HISHAM1875	2022-04-26 05:11:09			1	ar	us		1	ar		Neutral	0	0	0
Google Play Store	9f2ee86c-4f07-4a1b-a926-5076632132c2	The application works very efficiently. My siblings and I all own Arabi cards and we all use the application very efficiently.	ABDULLAH DOUJA	2022-04-24 07:47:40	عميلنا العزيز شكرا لثقتك وتعاملك مع البنك العربي الوطني، نتطلع دائماً الى تقديم الافضل لكم مع تحيات فريق دعم العربي نت والعربي موبايل	2022-05-12 10:43:16	7	ar	us		5	ar	application work efficiently siblings arabi card use application efficiently	Positive	0	1	0
Google Play Store	e05121c6-d31d-4506-adb1-a78d30c35b1a	"A very bad application, and I wish you could learn from Al Rajhi Bank."	عبدالله	2022-04-21 21:40:43			1	ar	us		1	ar	bad application wish could learn al rajhi bank	Negative	1	0	0
Google Play Store	4b85a619-7588-4de0-b496-e5c25070ff6d	I couldn't open the Oulan Arabic website, and I tried several times and checked with the branches, but to no avail.	نافع الهاشم	2022-04-21 08:33:36			5	ar	us		1	ar	couldnt open oulan arabic website try several time check branch avail	Negative	0	1	0
Google Play Store	01a51bd7-7c6c-45c7-b3ff-d732722129a5	The application is not working, it says an error has occurred.	رضا مختار محمد حسن حسن	2022-04-19 23:10:01			1	ar	us		1	ar	application work say error occur	Negative	0	1	0
Google Play Store	9b860852-3a9d-46ba-878c-d939e7c11055	Very excellent and comfortable application, and all services are available in the application and easy to use.	Breezy	2022-04-18 17:42:24			1	ar	us		5	ar	excellent comfortable application service available application easy use	Positive	0	0	0
Google Play Store	2f3b23da-ca11-4526-92e9-6e4e251f760c	The application is not working for me and for most people... Where is the technical support or developer?	mohamed essam	2022-04-17 22:03:12			2	ar	us		1	ar	application work people technical support developer	Negative	0	1	0
Google Play Store	d1dc467d-9eb6-45a4-8af8-4c35fd27e344	Very bad and worse than that, you won't find.	Egy E	2022-04-17 12:28:16			2	ar	us		1	ar	bad bad wont find	Negative	1	0	0
Google Play Store	48c49a8b-4060-466b-a10f-a7d0f509d23b	Unfortunately, it's been more than two weeks that the application does not open.	فهد الاحمري	2022-04-17 06:02:10			7	ar	us		1	ar	unfortunately two weeks application open	Negative	1	1	0
Google Play Store	aefac79a-250d-4262-85b7-d3bf64c6a930	My account has been frozen, and I received a message to update my information through the app. However, the app is not working. I tried to register multiple times, but I keep getting an error message saying that registration is not possible due to some error.	Soliman Sleem	2022-04-14 19:31:07			11	ar	us		1	ar	account freeze receive message update information app however app work try register multiple time keep get error message say registration possible due error	Negative	0	1	1
Google Play Store	7ff633a6-ebb6-4b54-a63a-ba55880c9ad1	A truly amazing application. Many thanks to Al Arabi National Bank for what they offer, and thanks are extended to all the employees at Al Arabi Bank.	ابو خالد	2022-04-12 17:46:12	عميلنا العزيز شكرا لثقتك وتعاملك مع البنك العربي الوطني، نتطلع دائماً الى تقديم الافضل لكم مع تحيات فريق دعم العربي نت والعربي موبايل	2022-05-12 10:46:23	0	ar	us		5	ar	truly amaze application many thank al arabi national bank offer thank extend employees al arabi bank	Positive	0	0	0
Google Play Store	5132dcfa-cf3d-463a-85a9-08a4f62de381	Your application is not bad, but it does not work at all. Please do not send emails contacting us or always say that you will fix it and nothing happens. The solution is to change the bank. Regards.	Olyan Store	2022-04-12 01:46:46			2	ar	us		1	ar	application bad work please send email contact us always say fix nothing happen solution change bank regard	Negative	1	1	0
Google Play Store	a960c15e-f6ac-4dfc-861f-ddcd5251407f	The application is not functioning, and contact was made with the management, who responded by saying that the problem is with the phone, which is not justified. It is just an excuse for their inability to solve the issue.	Mohammad Lafi	2022-04-10 21:51:35			14	ar	us		1	ar	application function contact make management respond say problem phone justify excuse inability solve issue	Negative	0	1	0
Google Play Store	1e22fc58-7692-4af6-8d69-aab545fc0dc0	Very wonderful bank.	Mohamed Louifi	2022-04-10 14:56:34	عميلنا العزيز شكرا لثقتك وتعاملك مع البنك العربي الوطني، نتطلع دائماً الى تقديم الافضل لكم مع تحيات فريق دعم العربي نت والعربي موبايل	2022-05-12 10:46:37	0	ar	us		5	ar	wonderful bank	Positive	0	0	0
Google Play Store	6eee2cf8-8f70-4284-b58c-7a12b35503dd	When I try to open a new account, it says "We are unable to serve you. I hope the problem gets fixed."	مجرم قيمز القحطاني	2022-04-10 13:29:56			1	ar	us		1	ar	try open new account say unable serve hope problem get fix	Negative	0	1	0
Google Play Store	70b40438-fab8-43fa-923a-7dda0c45830b	Now it's not worth any star, the application shows (Request failed with status undefined), I tried to use the browser and it showed (Your Valid Session already exists, Try after 10 minutes), and by God, I'm tired of it. If it weren't for my retirement pension, I would have gone to someone else long ago. I wish you wouldn't lie to me as you did before. God is sufficient for me; He is the best disp…	أبو رائد [طيبة المدينة]	2022-04-10 00:24:37	عميلنا العزيز الدخول بستخدام خدمة رمز المرور لمرة واحدة لا يتطلب ادخال الرمز في التحويل. في حال استمرار المشكلة، الرجاء التواصل معنا عبر البريد الالكتروني: ebank@anb.com.sa أو الاتصال على هاتف العربي، خدمات الحسابات ومن ثم الضغط على خيار رقم 5 خدمات العربي نت والعربي موبايل. من داخل المملكة / 8001244040 من خارج المملكة / 00966112127555	2022-03-23 07:33:56	109	ar	us		1	ar	worth star application show request fail status undefined try use browser show valid session already exist try minutes god im tire werent retirement pension would go someone else long ago wish wouldnt lie god sufficient best disposer affairs manage log browser transfer show please update beneficiarys address update havent update god sufficient best disposer affairs last third night ramadan	Negative	1	1	0
Google Play Store	e881b94d-1ef5-4635-a4ac-fc87f2ff7f61	It works well after the recent updates.	saad alsuhaimi	2022-04-09 11:43:45	عزيزنا العميل: نود افادتكم أنه تم إصلاح الخلل الذي طرأ على تطبيق العربي موبايل. يرجى حذف التطبيق وإعادة تحميله مرة أخرى ليعمل بشكل صحيح، آملين قبول اعتذارنا عن أي ازعاج لكم.	2020-12-31 10:17:44	1	ar	us		4	ar	work well recent update	Positive	0	1	0
Google Play Store	76a357d0-6ed5-4375-a7c3-73671754ecfc	When I enter my information in the app, it tells me that an error occurred in the process.	Moand	2022-04-07 10:21:50			2	ar	us		1	ar	enter information app tell error occur process	Negative	0	1	0
Google Play Store	d0844ac0-6ee9-4573-8143-466d9274a134	The application is not working and it freezes. I have deleted and reinstalled it, but the problem still persists. Please solve the problem as soon as possible.	traveler man	2022-04-07 07:45:15			9	ar	us		1	ar	application work freeze delete reinstall problem still persist please solve problem soon possible	Negative	0	1	1
Google Play Store	0207fb7c-a8e5-48e6-89da-805347d96844	The application is not working and an error message is displayed saying "Request failed with status undefined", although the application has been updated to the latest version.	Reda Marhomi	2022-04-05 23:30:30			4	ar	us		1	ar	application work error message display say request fail status undefined although application update late version	Negative	0	1	0
Google Play Store	0fa852e7-fbf9-42ab-94a7-8b1007bef1ca	The application has a problem and does not open at all.	علي ابو جاد	2022-04-05 19:48:12			2	ar	us		1	ar	application problem open	Negative	0	1	0
Google Play Store	d99b2bdd-6d9f-48e2-aed7-0868098385af	The application is not working.. cannot login... the application is not working.... it still doesn't work despite being updated after reporting.	ابومريم الشيباني	2022-04-05 08:55:46			9	ar	us		1	ar	application work login application work still doesnt work despite update report	Negative	0	1	0
Google Play Store	6a290067-a991-4744-acc7-479bd2e38982	An amazing application	محمد السوطاني	2022-04-05 04:17:47	عميلنا العزيز شكرا لثقتك وتعاملك مع البنك العربي الوطني، نتطلع دائماً الى تقديم الافضل لكم مع تحيات فريق دعم العربي نت والعربي موبايل	2022-04-07 09:43:25	0	ar	us		5	ar	amaze application	Positive	0	0	0
Google Play Store	b7169536-4028-4f9b-a734-3ef4853f4b6e	The application is not working even after updating. It gives me a message "Request failed with status undefined."	navystar20 navystar	2022-04-04 15:36:19			3	ar	us		1	ar	application work even update give message request fail status undefined	Negative	0	1	0
Google Play Store	e9c61517-eb7d-4b22-a5f3-3fef731bbafd	"Not working, it says system error."	Abeer Flower	2022-04-03 22:57:19			2	ar	us		1	ar	work say system error	Negative	0	1	0
Google Play Store	3ccd6023-e883-402a-8e92-bcdca48c8ff7	When I want to create a new account, I cannot. Why?	ggwam Q5	2022-04-02 10:59:48			1	ar	us		1	ar	want create new account	Negative	1	1	0
Google Play Store	5b5c2d7a-cb02-419c-89d7-3785ad3d82f9	"A bad application that doesn't work, the old application is better than the new one."	Aya7 Dudusu	2022-04-01 05:42:16			2	ar	us		1	ar	bad application doesnt work old application good new one	Negative	1	1	0
Google Play Store	deec34ac-c0b7-4bfd-aa9d-bce91e46d4dd	I am currently residing here in Libya, serving. Praise be to God.	Hammody	2022-03-31 14:24:40			0	ar	us		5	ar	currently reside libya serve praise god	Positive	0	1	0
Google Play Store	17c21bf8-4c1e-4fa3-8468-7aad03d1ccf2	What does not work	قبس احمد	2022-03-30 10:02:40			2	ar	us		1	ar	work	Negative	0	1	0
Google Play Store	09c6683c-c2c1-4029-90ec-5d1725670971	By Allah, it is the best application.	العراقي MO	2022-03-29 19:14:28			0	ar	us		5	ar	allah best application	Positive	0	0	0
Google Play Store	692bdc6e-88ac-4670-b039-d339505d868d	URL address rejected.	bedaya 1	2022-03-29 00:08:18			1	ar	us		1	ar	url address reject	Negative	0	1	0
Google Play Store	ac4a3f2c-d05b-487b-b065-8b20f1d5b816	Is it good for Iraq?	Mr L7n	2022-03-28 22:41:12			0	ar	us		5	ar	good iraq	Negative	0	0	0
Google Play Store	97cad67c-f29f-4f26-af3f-26e718b01ece	dASD	Fgpf Doem	2022-03-28 13:21:01			0	ar	us		5	ar	dasd	Neutral	0	0	0
Google Play Store	62cd07a6-5f02-4d3b-9d4b-880574fffbbb	Together with the people!!!!!!!!!!!!!!!!!!!!!!!!!!!!!!!!!!!!!!!!!!!!!!!!!!!!!!!!!!!!!!!!!!!!!!!!!!!!!!!!!!!!!!!!!!!!	بلال عدنان	2022-03-28 02:22:37			0	ar	us		5	ar	together people	Positive	0	0	0
Google Play Store	87ef2cc8-9d2f-4d76-9e7e-b025e139661c	Is the application inclusive of Arab countries or specific to a certain country?	Ahmed Salm	2022-03-27 22:34:32			0	ar	us		4	ar	application inclusive arab countries specific certain country	Neutral	1	0	0
Google Play Store	6361fcd7-c57d-4ef3-9868-61046c6e94c8	I wish if it is available in Libya.	Akram ZN	2022-03-27 21:32:32			0	ar	us		5	ar	wish available libya	Neutral	1	0	0
Google Play Store	8396b71a-ebd2-436e-898f-a0729a2f9b65	Every time I create a u account for the youth, they say please visit the nearest branch.	محارب الشحاذين	2022-03-27 19:30:24			0	ar	us		2	ar	every time create u account youth say please visit near branch	Negative	0	1	0
Google Play Store	a1d0660c-0e88-4df5-ae99-cfb778cde70e	Bandarita (a name)	TIm Dolare	2022-03-27 18:38:34			0	ar	us		5	ar	bandarita name	Neutral	1	0	0
Google Play Store	7ec034c1-fe8b-4e77-b95e-8b640be777ad	The application hangs when logging in. It says there is an error during the execution of the operation. We kindly ask you to solve the problem as soon as possible.	ابن الصحراء	2022-03-27 15:47:25			3	ar	us		2	ar	application hang log say error execution operation kindly ask solve problem soon possible	Negative	0	1	1
Google Play Store	6ba283cb-0a97-4236-b517-61ded690d499	The application is not working. Contact was made and the issue was reported. According to their response, it was updated and tried to be used again, but it is still in the same state. When opening it, it does not open and two options appear to enter the code or use fingerprint. By selecting one of the options, the application appears to be stopped.	S gfyn	2022-03-27 10:40:28			106	ar	us		1	ar	application work contact make issue report accord response update try use still state open open two options appear enter code use fingerprint select one options application appear stop	Negative	0	1	0
Google Play Store	370ffb8a-e20b-45f6-a1bf-c6026d6a7e14	The application is invalid. I hope the problem can be resolved, unfortunately, this reflects negatively on the bank.	فهد النويصر	2022-03-26 09:40:39			1	ar	us		1	ar	application invalid hope problem resolve unfortunately reflect negatively bank	Negative	1	0	0
Google Play Store	2c0991d7-6d70-49d0-b251-db86a663edfc	It is difficult to enter the application and it exits upon entry.	ameer alsulaimani	2022-03-25 22:55:19			2	ar	us		1	ar	difficult enter application exit upon entry	Negative	1	0	0
Google Play Store	14a2060a-2ddb-438c-8d7c-c397dab79c6d	ووووبسنت (It is not a complete sentence, it seems to be a typo)	عبدالرحمن العلي	2022-03-24 20:15:13			0	ar	us		5	ar	complete sentence seem typo	Negative	1	1	0
Google Play Store	8db50363-589c-4993-8603-1c44ab952345	Excellent, useful, and cost-saving application.	عبدالعزيز عبدالله 99	2022-03-24 13:52:55			1	ar	us		5	ar	excellent useful costsaving application	Positive	0	0	0
Google Play Store	7c2a4f3e-7b5e-4f9f-8a43-c16baaedf50a	Very slow when entering and renting	عبدالله الغامدي	2022-03-24 05:14:41			0	ar	us		1	ar	slow enter rent	Negative	0	0	1
Google Play Store	6efc1c78-df07-4d4d-8e02-6738a4a20b72	👍 Excellent application that includes all the services I need. Thank you, Arab Bank.	كاظم مصلح النخلي (أبو موفق)	2022-03-23 20:38:59			2	ar	us		4	ar	excellent application include service need thank arab bank	Positive	1	0	0
Google Play Store	0a28b593-31d8-4a12-b5ae-d66ba4d1a89a	This translates to: "the worst application, I demand the expulsion of Inno."	نوم نوم	2022-03-23 15:52:31			1	ar	us		1	ar	translate bad application demand expulsion inno	Negative	1	0	0
Google Play Store	64c10bc8-230c-4b78-8b3f-0e92a3dc2669	The worst application and bank on the face of the earth.	شَهد.	2022-03-22 15:53:49			1	ar	us		1	ar	bad application bank face earth	Negative	1	0	0
Google Play Store	c288a776-c1c5-4136-b6a5-69a4bf9e5abc	Unfortunately, the application isn't working. Please find a solution, this is unacceptable. My account has been suspended. We need to update the data. From yesterday until now, why is this happening???	جيمي جيم	2022-03-22 15:03:52			8	ar	us		1	ar	unfortunately application isnt work please find solution unacceptable account suspend need update data yesterday happen	Negative	1	1	1
Google Play Store	1731119e-2975-4ef5-9e27-743ab805d75b	Thank you. The feedback has been taken into account, and the application has been updated, adding features for further development. For the past two days, the application has been freezing, and it overall needs improvement, especially regarding the issue of freezing and delay upon login.	الصقر الاخضر	2022-03-21 14:26:03	عميلنا العزيز شكرا لتعاملك مع البنك العربي الوطني، التطبيق يعمل بكفاءة في حال استمرار المشكلة، الرجاء التواصل معنا عبر البريد الالكتروني: ebank@anb.com.sa أو الاتصال على هاتف العربي، خدمات الحسابات ومن ثم الضغط على خيار رقم 5 خدمات العربي نت والعربي موبايل. من داخل المملكة / 8001244040 من خارج المملكة / 00966112127555	2022-03-21 13:36:30	30	ar	us		1	ar	thank feedback take account application update add feature development past two days application freeze overall need improvement especially regard issue freeze delay upon login	Neutral	0	0	1
Google Play Store	ad0ec952-3f4c-4811-9f13-0243b5903a9e	Power	ابو هارون	2022-03-21 14:22:29			0	ar	us		4	ar	power	Positive	0	1	0
Google Play Store	42902cca-dc1c-44a2-9c03-50de71ba54ce	Very beautiful and comfortable.	فيصل Ama	2022-03-21 12:27:36	عميلنا العزيز شكرا لثقتك وتعاملك مع البنك العربي الوطني، نتطلع دائماً الى تقديم الافضل لكم مع تحيات فريق دعم العربي نت والعربي موبايل	2022-03-22 06:27:37	0	ar	us		5	ar	beautiful comfortable	Positive	0	0	0
Google Play Store	f6cb5e12-a1fa-4537-9fc1-3c7d618cc87a	The application constantly crashes/errors.	mahmoud mansour	2022-03-19 21:53:39	عميلنا العزيز شكرا لتعاملك مع البنك العربي الوطني، التطبيق يعمل بشكل فعال في حال استمرار المشكلة، الرجاء التواصل معنا عبر البريد الالكتروني: ebank@anb.com.sa أو الاتصال على هاتف العربي، خدمات الحسابات ومن ثم الضغط على خيار رقم 5 خدمات العربي نت والعربي موبايل. من داخل المملكة / 8001244040 من خارج المملكة / 00966112127555	2022-03-23 06:13:23	13	ar	us		1	ar	application constantly crasheserrors	Negative	0	1	0
Google Play Store	576fdbf1-2fbc-4e16-a350-2279156299be	There is a message that appears "An error occurred while executing the operation".. What is the solution?	Hosam Salah	2022-03-18 08:28:13	عميلنا العزيز شكرا لتعاملك مع البنك العربي الوطني، لمساعدتك على حل المشكلة التي تواجهك، الرجاء الاتصال على هاتف العربي، خدمات الحسابات ومن ثم الضغط على خيار رقم 5 خدمات العربي نت والعربي موبايل. من داخل المملكة / 8001244040 من خارج المملكة / 00966112127555 مع تحيات فريق دعم العربي نت والعربي موبايل	2022-03-20 14:20:13	12	ar	us		1	ar	message appear error occur execute operation solution	Negative	0	1	0
Google Play Store	1553d84c-d30f-4b61-8e18-63fd61f91885	Easy and clear, but more work should be done on the application interface.	Ahmed Alsaif	2022-03-18 00:19:57			1	ar	us		4	ar	easy clear work do application interface	Neutral	0	0	0
Google Play Store	980d1a3d-e696-4791-be04-e2b8a24d1d8e	The verification code is not being sent quickly, I've been waiting for 5 hours for the verification code.	سعيد الغامدي	2022-03-14 14:31:13			1	ar	us		1	ar	verification code send quickly ive wait hours verification code	Negative	0	1	0
Google Play Store	cc5a0a3d-ffb3-4ae6-ba04-d60a773b44a0	Excellent after the latest update 👍🏼😎🌹🥇,,	محمد اليماني	2022-03-13 14:22:30	عميلنا العزيز شكرا لثقتك وتعاملك مع البنك العربي الوطني، نتطلع دائماً الى تقديم الافضل لكم مع تحيات فريق دعم العربي نت والعربي موبايل	2022-03-21 12:45:54	69	ar	us		5	ar	excellent late update	Positive	0	0	0
Google Play Store	1ca7e1dd-1976-4a33-8d0f-244ec4902071	The application is down.	عبود	2022-03-11 18:06:24			1	ar	us		1	ar	application	Negative	0	1	0
Google Play Store	2a353861-433b-4393-8efb-da762fc90ed2	And neither did the update star appear. I received a message stating there is a problem with the application, and it has not been fixed yet. I am disappointed with you and your application.	ظل	2022-03-11 13:23:10			5	ar	us		1	ar	neither update star appear receive message state problem application fix yet disappoint application	Negative	0	1	0
Google Play Store	a0c495de-0914-4861-9e41-0cb98fb8449d	Failed program. I read the comments, and most of what they say is true. It's not working properly, it's heavy to use, and it keeps asking for updates. What did I just download? Learn from Al Rajhi and hire competent technicians.	Abdulaziz 87	2022-03-11 11:35:17			1	ar	us		1	ar	fail program read comment say true work properly heavy use keep ask update download learn al rajhi hire competent technicians	Negative	0	1	1
Google Play Store	f62e20f0-c2a8-415a-b282-01d38025bc08	Zaq Si Mora application.	مؤسسة اللمعة المثيرهـ لخدمات السيارات	2022-03-11 00:03:17			0	ar	us		1	ar	zaq si mora application	Neutral	1	0	0
Google Play Store	756c4ec6-16f7-42fe-85f5-ec903b760e04	A bad bank, in every sense of the word, exploiting and the worst application compared to other banks. It does not deserve any positive evaluation, and I only said this based on my experience dealing with it. I changed my phone and I want to register with the application, but it does not open for me unlike other banks, knowing that I deleted it from my old phone without any benefit.	محمدالعتيبي العتيبي	2022-03-10 22:00:05	عميلنا العزيز شكرا لتعاملك مع البنك العربي الوطني، نتطلع دائماً الى تقديم الافضل لكم، الرجاء تزويدنا بملاحظات على التطبيق عبر البريد الالكتروني: ebank@anb.com.saأو الاتصال على هاتف العربي، خدمات الحسابات ومن ثم الضغط على خيار رقم 5 خدمات العربي نت والعربي موبايل من داخل المملكة / 920005555 من خارج المملكة / 00966920005555	2021-07-26 11:08:38	0	ar	us		1	ar	bad bank every sense word exploit bad application compare bank deserve positive evaluation say base experience deal change phone want register application open unlike bank know delete old phone without benefit	Negative	1	0	0
Google Play Store	841b16c9-148f-4add-94ac-658a8814bdce	So	The only way	2022-03-10 19:03:45			0	ar	us		5	ar		Neutral	0	0	0
Google Play Store	1c480294-f2cd-470c-9ed8-cdbb5b3fd867	Unfortunately, it does not even deserve one star. And now, I have been trying for more than three hours. It opens for a minute and then freezes, there is no power or strength except with Allah.	كريم حاتم	2022-03-10 12:33:10			1	ar	us		1	ar	unfortunately even deserve one star try three hours open minute freeze power strength except allah	Negative	0	0	1
Google Play Store	6b9dc04f-13c1-4144-a696-21432f53b576	The application doesn't work.	الساهر العتيبي	2022-03-10 10:48:53			0	ar	us		1	ar	application doesnt work	Negative	0	1	0
Google Play Store	636590ab-3628-47f3-a0b3-c4493574354f	I've been trying for a week, but it doesn't work. I deleted it and returned it, but the same problem persists.	LOORD RAKAN	2022-03-10 07:37:55			0	ar	us		1	ar	ive try week doesnt work delete return problem persist	Negative	0	1	0
Google Play Store	7cc65d3c-e7d4-493e-a93a-73f17444a3ce	The old version was excellent at first, but now the new update is honestly exhausting when it comes to registration. It keeps giving me the response "try again later" multiple times, and I am still having trouble logging in.	أحمد أبوطالب	2022-03-10 01:51:43			1	ar	us		5	ar	old version excellent first new update honestly exhaust come registration keep give response try late multiple time still trouble log	Negative	0	1	1
Google Play Store	704adf24-03c7-4496-84bc-90bfa96258da	A good application, but it has an update problem. How can I request an update? In the settings, there is an option for automatic updates for all applications. I hope the problem is resolved quickly. Thank you for your help.	Ofug Guj	2022-03-10 00:33:38			0	ar	us		4	ar	good application update problem request update settings option automatic update applications hope problem resolve quickly thank help	Neutral	1	1	0
Google Play Store	e238dcdb-96e3-4114-a417-165fc61d94cf	the worst application and the worstbank, God willing, I will switch from Arab Bank.	٠٠ ٠٠	2022-03-09 21:43:37			0	ar	us		1	ar	bad application worstbank god will switch arab bank	Negative	1	0	0
Google Play Store	b57ba043-c07e-41ca-a8f2-dd6b0bf59791	Hello, may peace, mercy, and blessings of Allah be upon you. Unfortunately, there is an issue that I find highly regrettable. I consider the application to be very good unless I purchased a new phone and the application does not work. I have tried all the government applications and they work fine. I have also tried banking applications, and they work on my phone except for the Arab Bank Mobile A…	Um ali Alshomari	2022-03-09 16:17:04			3	ar	us		1	ar	hello may peace mercy blessings allah upon unfortunately issue find highly regrettable consider application good unless purchase new phone application work try government applications work fine also try bank applications work phone except arab bank mobile application receive instructions update problem remain unable register name account number	Negative	1	1	0
Google Play Store	86bed7d7-d0e4-4b0c-a924-ca429007fed0	I downloaded the application from the Apple store, and when I try to log in to my account, it doesn't respond and gives me a message "Your request needs an update. Pressing the icon does not respond, and I don't know the reason."	محمد ال مسعود	2022-03-09 13:49:50			3	ar	us		3	ar	download application apple store try log account doesnt respond give message request need update press icon respond dont know reason	Negative	0	1	0
Google Play Store	6181cbad-cb61-4bc6-9163-e2234056c579	I am a customer at the bank and I have difficulty in setting up electronic services such as bill payment, transferring to others, and checking the balance. How can I do that?	Taflan aldossary	2022-03-08 19:53:44			1	ar	us		2	ar	customer bank difficulty set electronic service bill payment transfer others check balance	Negative	1	0	0
Google Play Store	3ed399aa-4017-4983-afba-0f74fc37656c	Always bad, there is always a system malfunction.	D Sah	2022-03-08 06:27:44			0	ar	us		1	ar	always bad always system malfunction	Negative	1	1	0
Google Play Store	57bc7785-7b8d-480a-a1de-022c3196d0c8	Amazing	حسن سناري	2022-03-07 20:14:57	عميلنا العزيز شكرا لثقتك وتعاملك مع البنك العربي الوطني، نتطلع دائماً الى تقديم الافضل لكم مع تحيات فريق دعم العربي نت والعربي موبايل	2022-03-22 06:57:12	0	ar	us		5	ar	amaze	Positive	0	0	0
Google Play Store	5a0a435b-4e50-43a0-8d62-c9e192dc8ab7	The application "CC" does not open for me at all, and every time it tells me to update, but there is no update available in the first place.	Alwathig Mohamed	2022-03-07 13:53:58			0	ar	us		1	ar	application cc open every time tell update update available first place	Negative	0	1	0
Google Play Store	001c41fd-0d2b-43b3-b8ce-425300ea3027	Hello.. I downloaded the application and the login box appears, but it freezes and doesn't take me to the next step. I tried deleting it and downloading it again several times, but the application is still not working.	Sara khairi	2022-03-03 05:24:13			1	ar	us		4	ar	hello download application login box appear freeze doesnt take next step try delete download several time application still work	Negative	0	1	1
Google Play Store	e4c78b2b-d2d2-4899-a422-2a7392c0e08d	The application does not open in the Huawei store for the new Huawei P50 Pro, version 12, while the Huawei P40 and P30, version 11, open normally, but there is no quick login service.	M O	2022-03-02 19:16:07			0	ar	us		3	ar	application open huawei store new huawei p pro version huawei p p version open normally quick login service	Neutral	0	1	0
Google Play Store	901fdbdb-3831-4f91-aaa2-12da7e5a905a	Excellence/beauty	Trky Alotebe	2022-03-02 15:42:14			0	ar	us		5	ar	excellencebeauty	Positive	0	0	0
Google Play Store	a06c1d9c-7b89-4e11-bfd7-37612728eab2	Oh, why am I still sitting on Arab Bank? Soon, I will cancel my dealings with you. If I could, I would give you less than a star.	Fatima Alghamdi	2022-03-02 14:06:22			1	ar	us		1	ar	oh still sit arab bank soon cancel dealings could would give less star	Negative	1	1	0
Google Play Store	0e789a81-6c98-4efa-896f-bef036ff50f0	There is a problem in the application when transferring or paying a bill, when entering the transfer code or payment, the process fails and I have tried several times without success.	طارق الغامدي	2022-02-28 12:04:33			7	ar	us		3	ar	problem application transfer pay bill enter transfer code payment process fail try several time without success	Negative	0	1	0
Google Play Store	2d49edf3-e60d-466f-8f59-e5e57f84459c	The text "يعلق دأمن" in Arabic translates to "he suspends the security" in English.	Ali Alyaseen	2022-02-27 13:16:28			0	ar	us		1	ar	text arabic translate suspend security english	Neutral	0	1	1
Google Play Store	f8436ee1-5dce-4e35-a488-a9c880f694af	The application is not currently working and no notification has been made about it.	Anas Melhem	2022-02-27 06:18:29			0	ar	us		2	ar	application currently work notification make	Negative	0	1	0
Google Play Store	36a3cde9-ccb9-4223-9e18-1b39a34fd42b	The application is worse than bad, it's the worst.	خالد آل ساري	2022-02-27 05:41:51			0	ar	us		1	ar	application bad bad bad	Negative	1	0	0
Google Play Store	45343c17-df8f-4b27-bf5a-7ee400b3ac37	Very bad, and usually the old application is much better than it.	ورد المحبه	2022-02-27 05:36:27			2	ar	us		1	ar	bad usually old application much good	Negative	1	0	0
Google Play Store	a4224f68-e4df-4e85-897f-ad276726b6bb	Very bad, extremely slow and frustrating. I have other banking applications that are fast and easy. Please solve this issue of frequent freezing and sluggishness. There are complaints and people are complaining, please respond to us!	الموج الموج	2022-02-27 05:17:51			1	ar	us		1	ar	bad extremely slow frustrate bank applications fast easy please solve issue frequent freeze sluggishness complaints people complain please respond us	Negative	1	0	1
Google Play Store	1e5b368b-9754-4958-afaa-16046921b4a1	Every time I enter the application, it says there is an error with the ID number. What is the solution until someone who has information can help me?	بسم الله	2022-02-19 06:15:28	عميلنا العزيز شكرا لتعاملك مع البنك العربي الوطني، لمساعدتك على حل المشكلة التي تواجهك، الرجاء الاتصال على هاتف العربي، خدمات الحسابات ومن ثم الضغط على خيار رقم 5 خدمات العربي نت والعربي موبايل. من داخل المملكة / 8001244040 من خارج المملكة / +966 11 212 7555 مع تحيات فريق دعم العربي نت والعربي موبايل	2022-02-20 15:43:32	0	ar	us		1	ar	every time enter application say error id number solution someone information help	Negative	0	1	0
Google Play Store	f1657fca-9ee6-4c39-b678-aa7876ad3a97	One of the worst applications.	عبدالله العتيبي	2022-02-19 02:52:17	عميلنا العزيز شكرا لتعاملك مع البنك العربي الوطني، نتطلع دائماً الى تقديم الافضل لكم، الرجاء تزويدنا بملاحظات على التطبيق عبر البريد الالكتروني: ebank@anb.com.sa وللمساعدة ارجوا الاتصال على هاتف العربي، خدمات الحسابات ومن ثم الضغط على خيار رقم 5 خدمات العربي نت والعربي موبايل. من داخل المملكة / 8001244040 من خارج المملكة / +966 11 212 7555	2022-02-20 15:43:58	0	ar	us		1	ar	one bad applications	Negative	1	0	0
Google Play Store	262f047e-6346-4d79-91e3-ab97b5218ed9	Not very useful	مسفر الغامدي	2022-02-17 19:53:01			0	ar	us		1	ar	useful	Negative	0	0	0
Google Play Store	16696390-7320-41f8-9534-7a0ada9aa35f	Honestly, it is a significant leap and smoothness in usage. I thank all those involved in the system.	mhmmad122 ali122	2022-02-15 16:26:02			2	ar	us		5	ar	honestly significant leap smoothness usage thank involve system	Positive	0	0	0
Google Play Store	97da08bc-97d5-494f-b133-9e3e96a55009	The application does not work after the update and does not accept the password, although it is working fine on the website without any problems.	M m	2022-02-14 21:31:38			7	ar	us		3	ar	application work update accept password although work fine website without problems	Negative	0	1	0
Google Play Store	eec08d18-aac9-426c-9ec4-0a01c121973a	The website is down and not working.	ابوعايد	2022-02-14 11:55:33			0	ar	us		1	ar	website work	Negative	0	1	0
Google Play Store	f59d3c51-7fb3-415c-a620-009dac8342c5	My testimony about them is injured.	نورة الحلوة	2022-02-12 12:19:22			0	ar	us		5	ar	testimony injure	Negative	1	0	0
Google Play Store	5bfc39f1-5402-485b-944d-cb1f0dbba73c	Mashallah, the application deserves 5 stars, excellent.	سيد رضا العلويات	2022-02-11 14:54:05			0	ar	us		5	ar	mashallah application deserve star excellent	Positive	0	0	0
Google Play Store	dae27a7a-02b7-4ad2-b88e-0715ae40dda6	I have been dealing with Arab Bank application for approximately 20 years, and it is excellent.	سليمان الجهني	2022-02-10 17:24:13			0	ar	us		5	ar	deal arab bank application approximately years excellent	Positive	1	0	0
Google Play Store	3358dfb9-6e2b-4e50-993b-1928d27dd5cf	Very excellent! The fingerprint feature is amazing. I hope they add a feature to automatically save the verification code.	محمد العبداللطيف	2022-02-10 07:46:46			1	ar	us		5	ar	excellent fingerprint feature amaze hope add feature automatically save verification code	Positive	1	1	0
Google Play Store	b867001a-f277-4d5d-88cc-94d5a4308b05	"Failed in failure, and a complete disaster."	Konan Atard	2022-02-09 22:35:00			0	ar	us		1	ar	fail failure complete disaster	Negative	0	1	0
Google Play Store	d02b5a2d-5657-417b-9040-be592d7f923e	The "Khais" application often comes to my mind, it enhances Al Rajhi Bank.	Talal H	2022-02-04 15:22:59	عميلنا العزيز شكرا لتعاملك مع البنك العربي الوطني يتم الحظر في حال ادخال بيانات الدخول (اسم المستخدم او كلمة المرور )بشكل خاطئ لاكثر من مرة لمساعدتك على حل المشكلة ، الرجاء الاتصال على هاتف العربي، خدمات الحسابات ومن ثم الضغط على خيار رقم 5 خدمات العربي نت والعربي موبايل. من داخل المملكة / 8001244040 من خارج المملكة / 966112127555+	2022-02-07 14:27:41	0	ar	us		1	ar	khais application often come mind enhance al rajhi bank	Positive	1	0	0
Google Play Store	cf84cb00-ee55-489d-8cca-195190670800	Worse than bad.	ـعنكٌــٍوّشْـ509	2022-02-04 03:51:51	عميلنا العزيز شكرا لتعاملك مع البنك العربي الوطني، نتطلع دائماً الى تقديم الافضل لكم، الرجاء تزويدنا بملاحظات على التطبيق عبر البريد الالكتروني: ebank@anb.com.sa وللمساعدة ارجوا الاتصال على هاتف العربي، خدمات الحسابات ومن ثم الضغط على خيار رقم 5 خدمات العربي نت والعربي موبايل. من داخل المملكة / 8001244040 من خارج المملكة / 966112127555+	2022-02-07 14:28:21	0	ar	us		1	ar	bad bad	Negative	1	0	0
Google Play Store	c4e29101-576f-4737-ba8a-349d1546ff88	Very bad. When registering, it says there was a problem, and this problem is with the bank itself. I advise you to update, as we are in 2022.	fatma adel	2022-02-02 23:18:24	عميلنا العزيز شكرا لتعاملك مع البنك العربي الوطني، التطبيق يعمل بكفاءة في حال استمرار المشكلة، الرجاء التواصل معنا عبر البريد الالكتروني: ebank@anb.com.sa أو الاتصال على هاتف العربي، خدمات الحسابات ومن ثم الضغط على خيار رقم 5 خدمات العربي نت والعربي موبايل. من داخل المملكة / 8001244040 من خارج المملكة / 966112127555+	2022-02-07 14:29:25	3	ar	us		1	ar	bad register say problem problem bank advise update	Negative	1	1	0
Google Play Store	63672b58-9a05-4475-90ba-3f0df6d34a12	Slow, inconvenient, and tired of changing the password. It's difficult and takes a lot of effort.	صالح	2022-02-01 09:13:41			0	ar	us		1	ar	slow inconvenient tire change password difficult take lot effort	Negative	1	0	1
Google Play Store	1e5d126c-0620-4ade-a358-5b9bc9b03171	How can I attach a salary confirmation letter that does not have a designated space?	Saud Fahad	2022-01-30 07:23:57	عميلنا العزيز شكرا لتعاملك مع البنك العربي الوطني، لمساعدتك على حل المشكلة التي تواجهك، الرجاء الاتصال على هاتف العربي، خدمات الحسابات ومن ثم الضغط على خيار رقم 5 خدمات العربي نت والعربي موبايل. من داخل المملكة / 8001244040 من خارج المملكة / 966112127555+	2022-02-07 14:39:23	0	ar	us		4	ar	attach salary confirmation letter designate space	Neutral	0	1	1
Google Play Store	f5a4af19-5e1a-4680-bc9f-f158ccc238fb	Useful and saves time.	علي مكتلي	2022-01-30 03:52:31			0	ar	us		5	ar	useful save time	Positive	0	0	0
Google Play Store	461f700b-3687-4181-8d65-69e2da34e946	Excellent experience, accomplish your tasks with Arabic.	بدر الدين محمد عمر	2022-01-29 14:32:43			0	ar	us		5	ar	excellent experience accomplish task arabic	Positive	0	0	0
Google Play Store	04d0d603-9429-4ac4-9cca-e948ef32188f	"The worst application and the worst bank, may Allah help the retirees."	salohe alsade	2022-01-24 13:42:57			0	ar	us		1	ar	bad application bad bank may allah help retire	Negative	1	0	0
Google Play Store	465bb641-f73b-49be-b67f-887c74241b15	Arab Bank and its employees, who want to work, want to go to work and not waste time. I've never been to the bank where an employee helps with a useful word. The employees are in the wrong place.	محمود احمد	2022-01-24 13:31:27	عميلنا العزيز شكواك محل اهتمامنا ارجو تزويدنا بتفاصيل أكثر عن المشكلة حتى يتم توجيهها الى الجهة المعنية من خلال التواصل معنا عبر البريد الالكتروني ebank@anb.com.sa أو الاتصال على هاتف العربي. من داخل المملكة / 8001244040 من خارج المملكة / 966112127555+ مع تحيات فريق دعم العربي نت والعربي موبايل	2022-02-07 14:40:21	1	ar	us		1	ar	arab bank employees want work want go work waste time ive never bank employee help useful word employees wrong place	Negative	1	1	1
Google Play Store	8535dcb5-518d-47ed-9dbc-27af2764ed32	🔹🔸Later on..... the application is useless. 🔸🔹 Every time I enter the username and password, it says it's incorrect while the website opens with the same data. 🔹🔸 The application needs an update as soon as possible.	عزوز العنزي	2022-01-20 23:40:52	عميلنا العزيز شكرا لتعاملك مع البنك العربي الوطني، التطبيق يعمل بكفاءة في حال استمرار المشكلة، الرجاء التواصل معنا عبر البريد الالكتروني: ebank@anb.com.sa أو الاتصال على هاتف العربي، خدمات الحسابات ومن ثم الضغط على خيار رقم 5 خدمات العربي نت والعربي موبايل. من داخل المملكة / 8001244040 من خارج المملكة / 966112127555+	2022-02-07 14:41:01	8	ar	us		1	ar	late application useless every time enter username password say incorrect website open data application need update soon possible	Negative	1	1	0
Google Play Store	c907cdbb-6f6a-4f09-87b6-d65a3170a23d	Since 29 AH, I have been dealing with Arab Bank, and the bank's service is extremely exceptional.	عايد الزهراني	2022-01-20 03:23:53	عميلنا العزيز شكرا لثقتك وتعاملك مع البنك العربي الوطني ، نتطلع دائماً الى تقديم الافضل لكم مع تحيات فريق دعم العربي نت والعربي موبايل	2022-02-07 14:41:58	2	ar	us		5	ar	since ah deal arab bank bank service extremely exceptional	Positive	0	0	0
Google Play Store	71135963-6f23-4f7e-b3db-bbeb9b867353	Al-Rajhi Bank only.	AL1221 Yahya	2022-01-19 21:23:25			0	ar	us		1	ar	alrajhi bank	Neutral	0	0	0
Google Play Store	3269f9a0-7462-4fed-8b98-f9a982e0e245	I tried to register on the Arabi Mobile app, but my registration is being rejected.	العنزي العنزي	2022-01-18 22:07:50	شكرا لتعاملك مع البنك العربي الوطني، لمساعدتك على حل المشكلة التي تواجهك، الرجاء الاتصال على هاتف العربي، خدمات الحسابات ومن ثم الضغط على خيار رقم 5 خدمات العربي نت والعربي موبايل. من داخل المملكة / 8001244040 من خارج المملكة / 966112127555+	2022-02-07 14:42:53	0	ar	us		1	ar	try register arabi mobile app registration reject	Negative	0	1	0
Google Play Store	0ce4bc1c-8984-4b57-bff1-d576a1536072	I thank them for their excellent treatment of me.	دخيل سليمان السبيعي	2022-01-17 15:22:33	عميلنا العزيز شكرا لثقتك وتعاملك مع البنك العربي الوطني، نتطلع دائماً الى تقديم الافضل لكم مع تحيات فريق دعم العربي نت والعربي موبايل	2022-02-07 14:43:38	0	ar	us		5	ar	thank excellent treatment	Positive	0	0	0
Google Play Store	a982cbd3-390e-4998-8767-42132414e4c3	Late with updates compared to other banks. 1 - When I enter the application, it asks me to enter the password every time. 2 - When I want to get a Visa card, it requires me to go to the bank.	Fawaz Iskander	2022-01-16 17:21:37			2	ar	us		1	ar	late update compare bank enter application ask enter password every time want get visa card require go bank	Neutral	0	1	0
Google Play Store	a33fcdc1-066b-4902-b503-65c3499be099	Why are the text messages in English? We are Arabs, and the bigger problem is that it's called the Arab Bank! And everything in it is in a non-Arabic language. It's so stupid! If it wasn't for the institute forcing me, I wouldn't have created an account with this stupid bank.	3I	2022-01-14 20:15:19	عميلنا العزيز شكرا لتعاملك مع البنك العربي الوطني، لمساعدتك على حل المشكلة التي تواجهك، الرجاء الاتصال على هاتف العربي، خدمات الحسابات ومن ثم الضغط على خيار رقم 5 خدمات العربي نت والعربي موبايل. من داخل المملكة / 8001244040 من خارج المملكة / 966112127555+	2022-02-07 14:44:52	5	ar	us		1	ar	text message english arabs big problem call arab bank everything nonarabic language stupid wasnt institute force wouldnt create account stupid bank	Negative	1	0	0
Google Play Store	c26bd52c-fae1-4aa1-87e3-2c470c61cf3b	Very bad, to the point that you wouldn't expect any progress in the bank, neither in the program. A sterile bank with no services, nothing. 😔 😔	يحي جعفري	2022-01-14 12:54:56	عميلنا العزيز شكرا لتعاملك مع البنك العربي الوطني، نتطلع دائماً الى تقديم الافضل لكم، الرجاء تزويدنا بملاحظات على التطبيق عبر البريد الالكتروني: ebank@anb.com.sa وللمساعدة ارجوا الاتصال على هاتف العربي، خدمات الحسابات ومن ثم الضغط على خيار رقم 5 خدمات العربي نت والعربي موبايل. من داخل المملكة / 8001244040 من خارج المملكة / 966112127555+	2022-02-07 14:45:13	0	ar	us		1	ar	bad point wouldnt expect progress bank neither program sterile bank service nothing	Negative	1	0	0
Google Play Store	f62b9410-2bc4-444e-9f71-2d4866f97e93	The best banking application	ahmedbagalagel	2022-01-14 11:39:49	عميلنا العزيز شكرا لتعاملك مع البنك العربي الوطني، نتطلع دائماً الى تقديم الافضل لكم اقتراحك محل اهتمامنا ونود إفادتك بأنه تم توجيه الاقتراح الى الإدارة المعنية مع تحيات فريق دعم العربي نت والعربي موبايل	2022-02-07 14:45:37	0	ar	us		5	ar	best bank application	Positive	0	0	0
Google Play Store	388a7be0-a458-4a31-a61b-a8fc159add09	Bad bank. Every time I try to register on Arabi Mobile, it says there is a system error. Hopefully, I will deactivate my account.	أبو جنا	2022-01-11 21:42:14			2	ar	us		1	ar	bad bank every time try register arabi mobile say system error hopefully deactivate account	Negative	1	1	0
Google Play Store	01655c36-8a99-4b90-a17a-f33bf7eb51c8	The worst thing worse than a bad bank is an app like it.	السريع	2022-01-11 09:38:02			0	ar	us		1	ar	bad thing bad bad bank app like	Negative	1	0	0
Google Play Store	2162999c-09d2-4d5b-bfce-e0c21cf5e7f3	safF	محمد عسير	2022-01-09 13:42:55			0	ar	us		5	ar	saff	Neutral	0	0	0
Google Play Store	c9522e68-e464-47ca-8a12-cfff98593313	The oud	محمد الزهراني	2022-01-06 21:21:16			0	ar	us		5	ar	oud	Neutral	1	0	0
Google Play Store	a6651d7e-f4f6-487a-b3e4-7571ad31ca4d	Upon entering the system, it indicates that there is a new update, but when requesting the update, it does not complete.	ابو عبدالله الشدادي	2022-01-05 14:05:51			0	ar	us		3	ar	upon enter system indicate new update request update complete	Neutral	0	1	0
Google Play Store	1aafa1be-438f-4705-8319-213f911adc0d	Very bad, recently they do not accept adding new accounts and I called the unified number but there was no response.	zainab al abbad	2022-01-05 11:45:52			3	ar	us		1	ar	bad recently accept add new account call unify number response	Negative	1	1	0
Google Play Store	c53bf2e1-f666-4f33-bf81-73f4eb773a40	It won't open, it wastes your time while you are waiting for it to open, and when it finally does open, it says "Update" and it's the latest update.	عبدالعزيز العبود	2022-01-03 05:48:05			0	ar	us		1	ar	wont open waste time wait open finally open say update late update	Negative	0	1	0
Google Play Store	a1b8e8ff-8010-453e-94d7-056aef0f8ce9	The system is a bit weak in terms of message response speed and updating the national address is difficult.	ا اا	2022-01-03 03:34:36			0	ar	us		3	ar	system bite weak term message response speed update national address difficult	Negative	1	0	0
Google Play Store	7c0b4f49-13e6-4084-aaf8-df27e0ae9bb7	I have a question for someone I love. They asked me for my ATM PIN number. Why do they need it? This number is personal to me, so why would they request it?	اسيه خالد	2022-01-02 11:38:51			1	ar	us		1	ar	question someone love ask atm pin number need number personal would request	Neutral	0	1	0
Google Play Store	e7d4b961-544c-42fb-a8ae-97e0bdb61bf0	I have a problem with the Arabic application. When I try to transfer and register a new beneficiary, it freezes and does not allow me to register the beneficiary. Please help me find a solution.	عبد العزيز ناجي	2022-01-01 22:06:16			3	ar	us		1	ar	problem arabic application try transfer register new beneficiary freeze allow register beneficiary please help find solution	Negative	0	1	0
Google Play Store	0fe77c94-a6ae-4944-baa2-458e7203018a	Okay	سمير الفرج	2023-08-24 09:16:16	نحن سعيدين بمشاركتنا رأيك وتجربتك معنا. شكرا لك	2023-08-28 19:51:36	0	ar	us		5	ur	okay	Positive	0	0	0
Google Play Store	f499557c-fc84-4469-b2e2-8d79f331cf83	BAD	محمد الجهني	2023-08-14 21:15:43	نعتذر للمشكلة التي واجهتك ونشكر لك ملاحظاتك لمساعدتك يرجى مشاركتنا تفاصيل المشكلة التي واجهتك عبر الرابط https://anb.tw/3Vpq1cv شكرا لزيارتك.	2023-08-20 05:30:49	0	ar	us		1	sd	bad	Negative	1	0	0
Google Play Store	a80ffb43-9ad5-4f07-94a8-42add38daa0f	It does not work.	منصور عبدالرحمن	2023-07-10 12:40:39	نعتذر للمشكلة التي واجهتك ونشكر لك ملاحظاتك لمساعدتك يرجى الاتصال بنا على 8001244040 او يمكنك مراسلتنا على حسابنا في تويتر @anb_care شكرا لك.	2023-07-16 18:35:05	0	ar	us		1	sd	work	Negative	0	1	0
Google Play Store	7c271362-ba78-44b5-a254-3b180f26abdf	Wowwwwwwwwwwwwwww, it's amazing!	أحمد عوض	2022-09-26 17:40:07			0	ar	us		5	sd	wowwwwwwwwwwwwwww amaze	Positive	0	0	0
Google Play Store	ba8b9dc8-3e97-4521-a6a4-a5f51739f9ae	It's not working.	حبيب الامس	2022-07-13 01:49:10			1	ar	us		1	sd	work	Negative	0	1	0
Google Play Store	b5b24968-cf22-4594-b2ce-9db4b52b6f0b	Excellence	عبدالله احمد الدبل	2022-06-25 11:33:53			0	ar	us		5	ur	excellence	Positive	0	0	0
Google Play Store	63cca737-bb29-4b57-91b4-5280092c6c10	"Good" or "better"	MX km	2022-05-21 01:19:59	عميلنا العزيز شكرا لثقتك وتعاملك مع البنك العربي الوطني، نتطلع دائماً الى تقديم الافضل لكم مع تحيات فريق دعم العربي نت والعربي موبايل	2022-05-30 09:08:10	0	ar	us		5	ur	good good	Positive	0	0	0
Google Play Store	15e58299-3ca3-4c65-8374-3b3c3cb5e7b5	Excellent 0	فيصل ماجد	2022-04-14 15:36:13	عميلنا العزيز شكرا لثقتك وتعاملك مع البنك العربي الوطني، نتطلع دائماً الى تقديم الافضل لكم مع تحيات فريق دعم العربي نت والعربي موبايل	2022-05-12 10:45:38	0	ar	us		5	ur	excellent	Positive	0	0	0
Google Play Store	39b1299a-9ba7-4ced-98b7-caef8d7d7cb3	Okay / All right	نهى حسنين	2022-03-09 04:43:09			0	ar	us		5	ur	okay right	Positive	0	0	0
Google Play Store	25dc95de-b6ca-4b9e-bde5-7f74c5bc9e25	Masha Allah! Very good and fast services.	سلمان حسين آل وصي	2023-09-08 01:52:03	نحن سعيدين بمشاركتنا رأيك وتجربتك معنا. شكرا لك	2023-09-12 05:28:36	0	ar	us		5	fa	masha allah good fast service	Positive	0	0	0
Google Play Store	55cec672-ad6e-4711-ac8a-1a1bc2869d6b	Excellent. Excellent.	harbi1500 harbi1500	2022-08-14 17:01:07			0	ar	us		5	fa	excellent excellent	Positive	0	0	0
Google Play Store	294d022b-6349-46f5-885a-94846df28f5f	Excellent excellent	عبدالله الشفق الخطيب الخطيب	2022-07-25 23:30:59			0	ar	us		5	fa	excellent excellent	Positive	0	0	0
Google Play Store	3a33c5c6-3712-4611-98dc-e27572b01fb0	Peace (greeting)	قاسم المباركي	2022-06-09 05:27:02			0	ar	us		5	fa	peace greet	Positive	0	0	0
Google Play Store	0661d734-b8e7-4cb2-a5ae-9ea15134ed56	FDSfsf	ياسر الجهني	2022-03-23 10:02:08			0	ar	us		5	fa	fdsfsf	Neutral	0	0	0
Google Play Store	d8cf9cf8-6eb3-48fe-8331-7b2cfbab6035	It's okay.	مطلق السلمي	2022-03-20 21:16:13			0	ar	us		4	fa	okay	Positive	0	0	0
Google Play Store	a78b7a34-e08f-4568-8a31-57e7a7960f6a	Hey ANB. Why are you continuously asking enables location, I already granted all permissions & you are still asking the same question. Solve this issue ASAP. Instead of apologising, work on issues/glitch.	MA FARHAN	2023-09-30 11:25:30	We apologize about your experience, Please contact us via https://anb.tw/3Vpq1cv for further assistance. Thank you for your feedback!	2023-10-02 05:48:16	1	en	us		1	en	hey anb continuously ask enable location already grant permissions still ask question solve issue asap instead apologise work issuesglitch	Negative	0	1	0
Google Play Store	b4930686-490b-4f3f-a8de-d59f5478fd69	it still kept asking to activate the location to complete the login even the location was already activated. Hope you can solve this issue i can't login my account...	Rubel Ahmed	2023-09-30 07:46:28	We apologize about your experience, Please contact us via https://anb.tw/3Vpq1cv for further assistance. Thank you for your feedback!	2023-10-02 05:48:08	1	en	us		1	en	still keep ask activate location complete login even location already activate hope solve issue cant login account	Negative	0	1	0
Google Play Store	37c5b4f0-6e84-46ca-855d-b881adcb4320	Before the app was good. But now it keeps asking to turn on location. It is not possible now to use this app. It needs to get better.	abdul bari	2023-09-28 10:20:16	We apologize about your experience, Please contact us via https://anb.tw/3Vpq1cv for further assistance. Thank you for your feedback!	2023-10-01 06:32:01	1	en	us		1	en	app good keep ask turn location possible use app need get good	Negative	1	0	0
Google Play Store	78179fac-1bac-4ab0-be9e-5b9949e4287d	It's always said cannot update national ID	frs# resha	2023-09-24 06:26:39	We apologize about your experience, Please contact us via https://anb.tw/3Vpq1cv for further assistance. Thank you for your feedback!	2023-09-26 07:41:02	0	en	us		3	en	always say update national id	Negative	0	1	0
Google Play Store	92f81878-cba4-44d3-8fe3-d0dfcdd6d2af	Not working mostly Plz fix this issue	Mahmoud Miligy	2023-09-22 17:47:44	We apologize about your experience, Please contact us via https://anb.tw/3Vpq1cv for further assistance. Thank you for your feedback!	2023-09-25 06:50:05	0	en	us		1	en	work mostly plz fix issue	Negative	0	1	0
Google Play Store	41abc7d9-f045-45fa-b206-9a79d8636774	Too much problematic app	idrees zaman	2023-09-19 19:37:50	We apologize about your experience, Please contact us via https://anb.tw/3Vpq1cv for further assistance. Thank you for your feedback!	2023-09-21 07:09:41	0	en	us		1	en	much problematic app	Negative	1	0	0
Google Play Store	c17a7c7e-073a-42b7-ac4a-83d46c912638	Issue with application	Yazan B	2023-09-17 12:44:54	We apologize about your experience, Please contact us via https://anb.tw/3Vpq1cv for further assistance. Thank you for your feedback!	2023-09-19 06:10:49	0	en	us		1	en	issue application	Neutral	0	1	0
Google Play Store	d3f32605-df36-4066-a7c1-b9b48a777bf4	Why no register in Mobil device	Naresh Kc	2023-09-15 20:49:36	We apologize about your experience, Please contact us via https://anb.tw/3Vpq1cv for further assistance. Thank you for your feedback!	2023-09-17 07:26:30	0	en	us		5	en	register mobil device	Neutral	0	1	0
Google Play Store	3d22d246-4d5b-4aa5-be71-5ef274f4f187	Before app was working very good but now I have problem when opening app every time asking about turning on location, even location is already on	Rizwan Siddiqui	2023-09-15 06:57:39	We apologize about your experience, Please contact us via https://anb.tw/3Vpq1cv for further assistance. Thank you for your feedback!	2023-09-17 07:25:28	1	en	us		3	en	app work good problem open app every time ask turn location even location already	Negative	0	1	0
Google Play Store	9d277d56-f5fd-42cb-ba0b-56aeac044c71	App not working. I keep getting "you must enable the location" error message. My location is already on. I am trying to make an online transaction but unable to. Please fix this.	FIORRE20	2023-09-12 08:46:59	We apologize about your experience, Please contact us via https://anb.tw/3Vpq1cv for further assistance. Thank you for your feedback!	2023-09-14 10:10:42	2	en	us		1	en	app work keep get must enable location error message location already try make online transaction unable please fix	Negative	0	1	0
Google Play Store	56cd9708-70db-4235-b14f-8b96117bd28d	Please sir tell other App Arab National Bank legal or not ???	Raj Tiger	2023-09-10 09:36:43	We apologize about your experience, Please contact us via https://anb.tw/3Vpq1cv for further assistance. Thank you for your feedback!	2023-09-12 05:31:28	0	en	us		5	en	please sir tell app arab national bank legal	Neutral	1	0	0
Google Play Store	7c17fbd2-b3be-4710-8871-4aba0f31c7b3	the last update, it still keep asking to activate the location to complete the login even location was already activate	Aatif Tyagi	2023-09-10 04:07:37	We apologize about your experience, Please contact us via https://anb.tw/3Vpq1cv for further assistance. Thank you for your feedback!	2023-09-12 05:30:21	0	en	us		1	en	last update still keep ask activate location complete login even location already activate	Neutral	0	1	0
Google Play Store	9a792fbd-bdca-4942-9b23-c4e1c3b8124a	Best Bank Application	Us Sarma	2023-09-08 11:53:05	We’re pleased to hear about your experience with us Thank you	2023-09-10 05:32:03	0	en	us		5	en	best bank application	Positive	0	0	0
Google Play Store	6bf96234-b359-4772-ab3a-657761ce64ca	My	shah alom	2023-09-07 14:23:28	We’re pleased to hear about your experience with us Thank you	2023-09-10 05:31:29	0	en	us		5	en		Neutral	0	0	0
Google Play Store	6e23444c-9ab2-4cc3-b551-9d79a1071547	Before the App was very smooth & easy, but with the last update, it still kept asking to activate the location to complete the login even the location was already activated. Hope you can solve this issue because it becomes noisy.	Mgh1659	2023-09-07 13:06:02	We apologize about your experience, Please contact us via https://anb.tw/3Vpq1cv for further assistance. Thank you for your feedback!	2023-09-10 05:31:18	22	en	us		3	en	app smooth easy last update still keep ask activate location complete login even location already activate hope solve issue become noisy	Negative	0	1	0
Google Play Store	b5260516-f5b5-42ad-98cc-461db19d78c6	Very nice and easy to use 🥰	gema Gantalao	2023-09-04 21:18:52	We’re pleased to hear about your experience with us Thank you	2023-09-07 11:39:16	0	en	us		5	en	nice easy use	Positive	0	0	0
Google Play Store	cd8e0abf-e45b-455e-b109-67e6e0965a1a	Even though I always give permission to access the location, it still gives a location error when entering the application	SÜLEYMAN YILDIRIM	2023-09-03 14:53:19	We apologize about your experience, Please contact us via https://anb.tw/3Vpq1cv for further assistance. Thank you for your feedback!	2023-09-05 05:16:15	1	en	us		1	en	even though always give permission access location still give location error enter application	Neutral	0	1	0
Google Play Store	bccad5c1-d44c-4f04-aae9-fbbeccc8a1b9	Please update and fix the app!!! Always asking to enable the location	Geline Herrera	2023-09-03 08:15:32	We apologize about your experience, Please contact us via https://anb.tw/3Vpq1cv for further assistance. Thank you for your feedback!	2023-09-05 05:16:07	0	en	us		1	en	please update fix app always ask enable location	Negative	0	1	0
Google Play Store	dfd82ed4-c71a-48cc-96ab-4a24bb1f9ed4	Mirza Jabir Baig	Mirza Jabir	2023-09-01 13:12:32	We’re pleased to hear about your experience with us Thank you	2023-09-03 05:59:06	0	en	us		4	hi	mirza jabir baig	Neutral	0	0	0
Google Play Store	bc96cbdb-c232-4457-be41-127f2471a304	Kindy improve the location detection for android users. it keeps on popping requesting to enable the location while it is already enabled. Making the app useless.	Allan Lane	2023-08-31 12:17:39	We apologize about your experience, Please contact us via https://anb.tw/3Vpq1cv for further assistance. Thank you for your feedback!	2023-09-03 05:51:48	2	en	us		2	en	kindy improve location detection android users keep pop request enable location already enable make app useless	Negative	1	1	0
Google Play Store	5b5ab98a-e1e1-40ef-b788-0d11b02d8e51	Many are complaining about location enable error but until now anb is not solving this problem. I enabled everything in my phone location, mic, camera, files what else do you want? Still error!!!	j “nasinilac” c	2023-08-30 14:16:32	We apologize about your experience, Please contact us via https://anb.tw/3Vpq1cv for further assistance. Thank you for your feedback!	2023-09-03 05:47:48	6	en	us		1	en	many complain location enable error anb solve problem enable everything phone location mic camera file else want still error	Negative	0	1	0
Google Play Store	34f265cb-7002-44ec-b0e6-686e2aa9f7e5	What's wrong this App. Unable to use location and keep getting location error.	Abdul Aleem	2023-08-30 09:05:18	We apologize about your experience, Please contact us via https://anb.tw/3Vpq1cv for further assistance. Thank you for your feedback!	2023-09-03 05:49:35	1	en	us		1	en	whats wrong app unable use location keep get location error	Negative	0	1	0
Google Play Store	95719311-e54f-4432-9537-036e538f34cb	LOCATION IS ALREADY ON, but the app is still asking me to turn on location. Bugged	Patch Sangalang	2023-08-30 07:30:47	We apologize about your experience, Please contact us via https://anb.tw/3Vpq1cv for further assistance. Thank you for your feedback!	2023-09-03 05:50:14	1	en	us		1	en	location already app still ask turn location bug	Negative	0	1	0
Google Play Store	593f0400-bb73-41e8-93ff-c9d3cc270615	After recent update, the app keep on asking to "turn on your location to use the app".. The location is already ON and already allowed, yet still have the same pop up. I don't know what happens.	Nurulhanis Md Isa	2023-08-30 03:41:53	We apologize about your experience, Please contact us via https://anb.tw/3Vpq1cv for further assistance. Thank you for your feedback!	2023-09-03 05:44:22	2	en	us		4	en	recent update app keep ask turn location use app location already already allow yet still pop dont know happen	Negative	0	1	0
Google Play Store	6b82087c-ab7b-4304-abb4-ccabb41829e5	Why application is not opening at my end? Anyone having same issue ?	Sadullah Hussaini	2023-08-29 14:50:23	We apologize about your experience, Please contact us via https://anb.tw/3Vpq1cv for further assistance. Thank you for your feedback!	2023-09-03 05:45:36	1	en	us		4	en	application open end anyone issue	Negative	0	1	0
Google Play Store	7fee746f-d2f5-4f2c-87d3-173a34e82855	The bank force you to use it and it's not good app at all. always lagging and not easy/friendly, and request to enable the location every 2 seconds even though it's enabled.	Ahmed Altawil	2023-08-29 11:42:29	We apologize about your experience, Please contact us via https://anb.tw/3Vpq1cv for further assistance. Thank you for your feedback!	2023-09-03 05:45:53	9	en	us		1	en	bank force use good app always lag easyfriendly request enable location every second even though enable	Negative	1	0	1
Google Play Store	65b3ab0b-5d2e-4992-bf84-19ad3fd2024a	Most of the time hanging and stopped working needs to upgrade it like AlRajhi Application	SalmanKhan RB (SalmanKhan RB)	2023-08-29 08:39:50	We apologize about your experience, Please contact us via https://anb.tw/3Vpq1cv for further assistance. Thank you for your feedback!	2023-09-03 05:46:00	1	en	us		1	en	time hang stop work need upgrade like alrajhi application	Negative	0	1	1
Google Play Store	49885429-8a99-4798-8ace-a7a23d60a998	Always asking to enable location while my location setting already enabled and application allowed. Telemoney exchange rate also differ from old ANB Mobile banking apps.	Odie Fontamillas	2023-08-28 11:13:48	We apologize about your experience, Please contact us via https://anb.tw/3Vpq1cv for further assistance. Thank you for your feedback!	2023-08-30 05:06:23	2	en	us		2	en	always ask enable location location set already enable application allow telemoney exchange rate also differ old anb mobile bank apps	Negative	0	1	0
Google Play Store	2d0a3834-b467-4774-8e06-b66d2aa6abec	We can't able to open the online account. This negative point for the bank	imran Ahmed	2023-08-28 07:19:22	We apologize about your experience, Please contact us via https://anb.tw/3Vpq1cv for further assistance. Thank you for your feedback!	2023-08-30 05:07:05	0	en	us		1	en	cant able open online account negative point bank	Negative	0	1	0
Google Play Store	bddeb721-2791-4502-9f60-d62f4c4e1b02	The app not working for 3 days .fix the problem	Abu SaMi	2023-08-28 04:06:56	We apologize about your experience, Please contact us via https://anb.tw/3Vpq1cv for further assistance. Thank you for your feedback!	2023-08-30 05:07:37	1	en	us		2	en	app work days fix problem	Negative	0	1	0
Google Play Store	5460ebad-2e45-4f4b-b4bb-e95b18667238	I am very helpful to use this app and it's very easy to use and safe	Sk Sarfi Alam	2023-08-28 03:46:58	We’re pleased to hear about your experience with us Thank you	2023-08-30 05:08:01	0	en	us		5	en	helpful use app easy use safe	Positive	0	0	0
Google Play Store	ae00db92-20e5-48ad-8ad7-26c029307397	It was much more easier	Ahmad AAAaaa	2023-08-27 20:24:46	We apologize about your experience, Please contact us via https://anb.tw/3Vpq1cv for further assistance. Thank you for your feedback!	2023-08-30 05:03:12	1	en	us		1	en	much easy	Positive	0	0	0
Google Play Store	3021da87-9f80-470a-82c4-2c1bb63d292d	Location is enabled, but in the middle of the transaction, we receive a message again and again to enable location. Re installed the app on the same mobile but received a message that you are registered in another device. Everyday new disappointment	Kashif Javed	2023-08-26 11:41:03	We are happy to serve you by calling customer service at 800 124 4040. Contacting us via Twitter @anb_care	2023-08-28 19:56:34	9	en	us		1	en	location enable middle transaction receive message enable location instal app mobile receive message register another device everyday new disappointment	Negative	1	0	0
Google Play Store	3d77dcfd-d601-4e83-8e5e-58e3cd3ef4b0	In order to be able to use the ANB Mobile app with all its features, you must enable the location on your device.( some time showing like this but my location is on )	Prasanth John	2023-08-23 08:30:54	We apologize about your experience, Please contact us via https://anb.tw/3Vpq1cv for further assistance. Thank you for your feedback!	2023-08-27 04:34:19	1	en	us		1	en	order able use anb mobile app feature must enable location device time show like location	Neutral	0	1	0
Google Play Store	e3efd246-a018-4459-8ae6-927d4a5834a8	Having bad experience with location identification. The app requests/claims location is off, even though it is on.	Nar Oj	2023-08-22 19:34:58	We apologize about your experience, Please contact us via https://anb.tw/3Vpq1cv for further assistance. Thank you for your feedback!	2023-08-27 04:34:10	9	en	us		1	en	bad experience location identification app requestsclaims location even though	Negative	1	0	0
Google Play Store	e928558b-e1cf-47ef-8629-48ceb2058f20	Although the location is permitted with application but everytime blue page coming to ask for location.	Shafeek Mohamed	2023-08-22 14:58:56	We apologize about your experience, Please contact us via https://anb.tw/3Vpq1cv for further assistance. Thank you for your feedback!	2023-08-27 04:34:03	1	en	us		1	en	although location permit application everytime blue page come ask location	Neutral	0	1	0
Google Play Store	1d683680-6072-439d-a96f-a836f25477e5	Worst always telling to open location even if it's open already.	Dave Fernandez	2023-08-21 01:52:06	We apologize about your experience, Please contact us via https://anb.tw/3Vpq1cv for further assistance. Thank you for your feedback!	2023-08-22 10:25:22	1	en	us		1	en	bad always tell open location even open already	Negative	1	1	0
Google Play Store	8c051f82-956a-4310-b903-fb6394a2d326	Since last months, i have had issues with this app, and even my location is on and enabled, but still, the apps show & asked to open location, it so horrible. I missed many important transactions. While seeing this app, my blood pressure arises & and leads to headache. Hopefully, my concern will be solved.	najam2 pharmacist	2023-08-21 00:51:52	We apologize about your experience, Please contact us via https://anb.tw/3Vpq1cv for further assistance. Thank you for your feedback!	2023-08-22 07:09:29	1	en	us		1	en	since last months issue app even location enable still apps show ask open location horrible miss many important transactions see app blood pressure arise lead headache hopefully concern solve	Negative	1	1	0
Google Play Store	6e9c3a23-8342-4638-8bb3-fce7b2395afa	Every time I log into my account using S23 Ultra, it asks me to enable Location services when it's already enabled. Your bank is garbage, your services are garbage, your app is garbage and your council is garbage. Everything about you is pure garbage, nothing else. I'm terminating every financial aspect with you for good. Hope to never see your garbage bank in my face again. 👋	Ghassan	2023-08-19 22:37:51	We apologize about your experience, Please contact us via https://anb.tw/3Vpq1cv for further assistance. Thank you for your feedback!	2023-08-21 03:34:50	3	en	us		1	en	every time log account use ultra ask enable location service already enable bank garbage service garbage app garbage council garbage everything pure garbage nothing else im terminate every financial aspect good hope never see garbage bank face	Negative	1	1	0
Google Play Store	a71f255b-d0f8-4c87-986a-ea2e5a404c34	Thank you very much ,very helpful and great service.	yukta Narayan Koirala	2023-08-17 05:28:41	We’re pleased to hear about your experience with us Thank you	2023-08-20 08:45:04	0	en	us		5	en	thank much helpful great service	Positive	0	0	0
Google Play Store	142f819c-dd98-4417-97eb-3bb32fa29dc9	Best banking app compared with other banks. Easy to use, most services are available, regularly gets updates, nice theme, organized, Keep up the great work. You are going in the right direction in this digital world. One suggestion: allow the user to choose theme colors other than the blue like gold ofr gold clients and grey for platinum clients.	Maxi Zahedi	2023-08-16 15:21:46	We’re pleased to hear about your experience with us Thank you	2023-08-20 08:42:35	9	en	us		5	en	best bank app compare bank easy use service available regularly get update nice theme organize keep great work go right direction digital world one suggestion allow user choose theme color blue like gold ofr gold clients grey platinum clients	Positive	1	0	0
Google Play Store	fc35a091-fcf3-4ac6-a22d-223f78e2468f	It recommends for update today, when clicking on it, playstore doesn't show any update rather could see options as either open or uninstall. Kindly check it. Finally, Uninstalled and reinstalled it to have it working.	Sirajudeen Muhammed Ibrahim	2023-08-16 06:35:34	We apologize about your experience, Please contact us via https://anb.tw/3Vpq1cv for further assistance. Thank you for your feedback!	2023-08-20 08:41:16	1	en	us		2	en	recommend update today click playstore doesnt show update rather could see options either open uninstall kindly check finally uninstalled reinstall work	Neutral	0	1	0
Google Play Store	3b85675b-6c31-40c9-9fb8-1eb8328714ab	Overall excellent	Javed rcr	2023-08-16 06:05:11	We’re pleased to hear about your experience with us Thank you	2023-08-20 08:41:03	0	en	us		5	en	overall excellent	Positive	0	0	0
Google Play Store	3be98e63-d2a4-4411-8b71-3510e6e0c3c2	App not working today	Aamir Amin Gujjar	2023-08-15 11:59:54	We’re pleased to hear about your experience with us Thank you	2023-08-17 04:46:46	0	en	us		5	en	app work today	Negative	0	1	0
Google Play Store	d2a79d37-d884-407d-9b19-defbc56a6ca7	can't use the app its always saying wrong information	Jeck Cad the one	2023-08-15 11:09:55	We apologize about your experience, Please contact us via https://anb.tw/3Vpq1cv for further assistance. Thank you for your feedback!	2023-08-17 04:46:33	0	en	us		3	en	cant use app always say wrong information	Negative	0	1	0
Google Play Store	c1b04e24-3183-4ff4-997f-9fd97f09644f	after the update today, app keeps asking me to update. I can't log in because it keeps requiring me to update which i have already done. Uninstall and reinstalled it, but still same issue.	MICAH SANICO	2023-08-15 09:04:47	We apologize about your experience, Please contact us via https://anb.tw/3Vpq1cv for further assistance. Thank you for your feedback!	2023-08-17 04:46:23	1	en	us		1	en	update today app keep ask update cant log keep require update already do uninstall reinstall still issue	Negative	0	1	0
Google Play Store	b40188ae-3b60-4a40-a2ea-437cf47b152f	Error for location enabled, Already location enable in my mobile but still asking for open it. Plz do your helpful to fix this problem because I can't make transactions. Thanks.	shadab lari	2023-08-13 11:46:44	We apologize about your experience, Please contact us via https://anb.tw/3Vpq1cv for further assistance. Thank you for your feedback!	2023-08-15 05:24:31	2	en	us		1	en	error location enable already location enable mobile still ask open plz helpful fix problem cant make transactions thank	Negative	0	1	0
Google Play Store	e9f19ea1-9692-4bbe-b430-9a6abc59c500	Customers respond very good 👍	Hafeez sheriff	2023-08-09 00:03:16	We’re pleased to hear about your experience with us Thank you	2023-08-10 09:37:25	0	en	us		5	en	customers respond good	Positive	0	0	0
Google Play Store	c2599b81-2896-4009-a977-41c3a20eb394	Why am unable to open the App after I came from Vacation? It shows blue screen. Even I deleted the app and reinstalled.	Mohammed Ishaq Anwar	2023-08-08 11:12:56	We apologize about your experience, Please contact us via https://anb.tw/3Vpq1cv for further assistance. Thank you for your feedback!	2023-08-10 05:47:25	0	en	us		1	en	unable open app come vacation show blue screen even delete app reinstall	Negative	0	1	0
Google Play Store	4f62d1d4-ef00-4ecd-81b1-03dbfaa41509	Great app for transferring money to another contrary this is trustable app send money without hesitation I like it	Feedback Environment	2023-08-06 07:54:53	We’re pleased to hear about your experience with us Thank you	2023-08-08 05:47:38	0	en	us		5	en	great app transfer money another contrary trustable app send money without hesitation like	Positive	1	0	0
Google Play Store	7580c7f5-c239-42ab-85e4-571a227e350b	I like the service very nice or fast alhumdullillah no problem come any time	Mona Lisa	2023-08-05 21:03:29	We’re pleased to hear about your experience with us Thank you	2023-08-07 08:41:45	0	en	us		5	en	like service nice fast alhumdullillah problem come time	Positive	0	0	0
Google Play Store	321c5bb1-7c05-4404-9290-6d5c0f2ecaf8	Good apps	Kamaruddin ansari	2023-08-05 01:42:08	We’re pleased to hear about your experience with us Thank you	2023-08-07 07:36:35	0	en	us		3	en	good apps	Positive	0	0	0
Google Play Store	9555c1f2-b162-4f8d-a118-71ecb8013401	Location is on then noticed on location	MOHAMMAD FAISHAL ALAM	2023-08-04 21:50:20	We apologize about your experience, Please contact us via https://anb.tw/3Vpq1cv for further assistance. Thank you for your feedback!	2023-08-06 06:06:27	0	en	us		1	en	location notice location	Neutral	0	1	0
Google Play Store	3400873d-faa6-4bba-b586-48671e4d41c6	Worst experience	shadan Shaikh	2023-08-04 13:23:20	We apologize about your experience, Please contact us via https://anb.tw/3Vpq1cv for further assistance. Thank you for your feedback!	2023-08-06 06:06:36	0	en	us		1	en	bad experience	Negative	1	0	0
Google Play Store	3a590489-bb2c-4b65-bfd2-c32d57ddd3ab	I really really regret I downloaded and applied for bank account through this app. I mean getting an account with ANB is quick and easy there's no problem with that, but the real problem is when you want to add a beneficiary so that you can send money to that beneficiary this is where start the problem. It's been 3-days since I downloaded the app and activated it and still it doesn't function as …	Eunes Jun	2023-08-03 20:31:54	We apologize about your experience, Please contact us via https://anb.tw/3Vpq1cv for further assistance. Thank you for your feedback!	2023-08-06 06:04:34	4	en	us		1	en	really really regret download apply bank account app mean get account anb quick easy theres problem real problem want add beneficiary send money beneficiary start problem days since download app activate still doesnt function mobile bank app cant use doesnt accept add beneficiaries	Negative	0	1	0
Google Play Store	f6293219-cd86-47ca-9832-afd99461f76e	I have too much problem in Huwya Tamimi Camp thus there is no Cash Option And Als onew Benificry Adding option new please Make Cash System in Huwaya tamimi.	Nafees Kiyani	2023-07-28 17:39:33	We are happy to serve you by calling customer service at 800 124 4040. Contacting us via Twitter @anb_care	2023-07-31 09:08:18	0	en	us		2	en	much problem huwya tamimi camp thus cash option als onew benificry add option new please make cash system huwaya tamimi	Negative	0	1	0
Google Play Store	2cb38124-3822-46ea-8043-cfbf768b59be	Many features and services are not available, only on apple	The Dude	2023-07-19 05:34:14	We apologize about your experience, Please contact us via https://anb.tw/3Vpq1cv for further assistance. Thank you for your feedback!	2023-07-23 06:25:25	0	en	us		1	en	many feature service available apple	Negative	0	1	0
Google Play Store	6d670ddb-64a2-4c02-ad0d-dfe385f7e2ea	Horrible! The app is sooo fine until they added the location access. Location is already enabled and still, it will give you an error message that "ANB needs to access your location". Please do something about it.	Fely I	2023-07-18 04:33:28	We apologize about your experience, Please contact us via https://anb.tw/3Vpq1cv for further assistance. Thank you for your feedback!	2023-07-20 04:12:36	12	en	us		1	en	horrible app sooo fine add location access location already enable still give error message anb need access location please something	Negative	1	1	0
Google Play Store	b27a9fc0-e271-4789-826a-96fe9f5b1e2f	In the place of Birth 🚫 not add Pakistan Country Review it if u add already But not showing during open new account	Shaheen Malik	2023-07-13 21:08:02	We are happy to serve you by calling customer service at 800 124 4040. Contacting us via Twitter @anb_care	2023-07-16 18:33:46	0	en	us		2	en	place birth add pakistan country review u add already show open new account	Neutral	0	1	0
Google Play Store	693dc7ba-63bf-4878-8186-86ca41ffd3ff	Better looking and fublnctiong application	Sayd Ahmed	2023-07-12 07:22:54	We’re pleased to hear about your experience with us Thank you	2023-07-16 18:33:16	0	en	us		5	en	good look fublnctiong application	Positive	1	0	0
[truncated: 247 more rows]
