# Supplementary material for: Retrieval-augmented generation analysis of user reviews in Saudi mobile banking apps: a comparative user experience study of iOS and Android
Source: PeerJ journal article supplement (doi:10.7717/peerj-cs.3565), 2026-02-06
Supplement: Android.zip [file BankAlBilad_final.xlsx]

## Sheet: Sheet 1 - BankAlBilad_final
BankAlBilad_final
source	review_id	review_description	user_name	review_date	developer_response	developer_response_date	thumbs_up	language_code	country_code	app_version	rating	en	cleaned_reviews	Sentiment	Satisfaction	Effectiveness	Efficiency
Google Play Store	f1d776e4-4eaf-4a48-b466-084f73f283b3	An application that lacks many banking services and forces you to visit the branch for trivial reasons.	Abdullah Al Zahrani	##########			0	en	us		1	ar	application lack many bank service force visit branch trivial reason	Negative	1	0	0
Google Play Store	2425a591-a5bb-4bd8-942b-5e7593da093f	Bad application and from the Stone Age, imagine when converting, no information about the beneficiary of the transfer appears.	Abu Mansour Alharthi	##########			0	en	us		1	ar	bad application stone age imagine convert information beneficiary transfer appear	Negative	1	1	0
Google Play Store	1cf2899b-0fc1-4eb7-b274-6886a5c78813	By God, it fails .. slow and constant closure ...	hammad alghanim	##########			0	en	us		1	ar	god fail slow constant closure	Negative	1	1	1
Google Play Store	f460fa90-23d9-4c43-98e8-ca376b3a9aaa	By God, it is really sad. It's the worst application that always crashes whenever I try to open it. I don't understand, doesn't the bank's management see this? Don't they use the application themselves? Seriously, is this a banking application or a button application?	Abdullelah O	##########			1	en	us		1	ar	god really sad bad application always crash whenever try open dont understand doesnt bank management see dont use application seriously bank application button application	Negative	1	1	1
Google Play Store	ab4b03fb-0349-426e-ad1c-bd196cb69def	A failed program. It keeps shutting down every now and then, I can't even carry out any operations!	Bader	##########			1	en	us		1	ar	fail program keep shut every cant even carry operations	Negative	0	1	0
Google Play Store	3afbb3a5-0436-4f05-8097-d26ae38f809f	The worst banking application I have dealt with.	Abdelhakim Elzenini	##########			1	en	us		2	ar	bad bank application deal	Negative	1	0	0
Google Play Store	29256f96-fac5-48ed-b16e-78ae18b5b25a	The application has become very bad and crashes frequently in the last few months. It prevents me from doing more than one task at a time. This hinders me and wastes my time.	Ameen Alhassan	##########			1	en	us		1	ar	application become bad crash frequently last months prevent one task time hind waste time	Negative	1	1	1
Google Play Store	c80a9a66-24a8-4b47-824a-b25ccf3e7834	The worst application that makes you cry because it takes many attempts to complete the conversion process, and every time it fails to carry out the operation.	Ahmed Assiri	##########			1	en	us		1	ar	bad application make cry take many attempt complete conversion process every time fail carry operation	Negative	1	1	1
Google Play Store	56155aec-d06b-4e46-bf13-3867faae29a9	After completing a financial transfer, it is not possible to share a (pdf) file as the sharing icon is not working.	M. Banafi	##########			1	en	us		4	ar	complete financial transfer possible share pdf file share icon work	Negative	0	1	0
Google Play Store	4572c8b5-a7ab-44cd-bc0d-2a3a030b6e8c	The last update is very bad.	YSHST	##########			1	en	us		2	ar	last update bad	Negative	1	0	0
Google Play Store	a5a6b048-544d-4561-8a4e-7b5ddfd04d2d	The development team is asleep.. Wake up, guys.. Half the price of one exchange will bring you an application that suits the bank's name and completes tens of thousands of operations that the exchange can do.	Dr. Gossadi	##########			1	en	us		1	ar	development team asleep wake guy half price one exchange bring application suit bank name complete tens thousands operations exchange	Neutral	1	1	1
Google Play Store	f63c4b91-ec66-4418-a347-c6dc214d9138	Most of the time, it is suspended and does not complete the transaction process, a service unworthy of a Saudi bank.	Reda AlSulaimani	##########			0	en	us		1	ar	time suspend complete transaction process service unworthy saudi bank	Negative	1	0	1
Google Play Store	8c7ae33c-5656-48c7-9bd3-cb39a59e4e61	I am trying to register a new login, but every time I get an error 000297.	Yyy Hk	##########			0	en	us		1	ar	try register new login every time get error	Negative	0	1	0
Google Play Store	c7a4f121-57ea-4278-a8ac-35d6f12d5188	A late application with a lot of shortcomings compared to other banking applications.	A Google user	##########			1	en	us		1	ar	late application lot shortcomings compare bank applications	Negative	1	0	0
Google Play Store	a632b098-d17c-4678-a654-40f478ced2c4	The device requires authentication with each login attempt. The software is slow and sometimes unresponsive.	Eyad Agheel	##########			0	en	us		2	ar	device require authentication login attempt software slow sometimes unresponsive	Negative	0	0	1
Google Play Store	8c21453d-de63-4884-9c8f-52242ba0ed03	The worst application in terms of login and customer service. Hopefully, it improves.	SFA house	##########			0	en	us		1	ar	bad application term login customer service hopefully improve	Negative	1	1	0
Google Play Store	fb9c1f29-d02b-4df0-866f-a455eba1fb3a	It is a shame that even for him, whenever he tries to log in, the service is unavailable. And if you manage to log in, you are immediately directed to a program that is unreliable and slow.	FAISAL AL-SRORRY	##########			0	en	us		1	ar	shame even whenever try log service unavailable manage log immediately direct program unreliable slow	Negative	1	0	1
Google Play Store	1870caf5-62be-49b7-994d-b49834958b74	The application is very bad and crashes abnormally. I am surprised that a bank in the same country has such a primitive application. I can't even do the simplest things without it freezing. A simple task like paying a bill takes at least half an hour due to the freezing. I am seriously considering transferring my salary from the bank because of their poor application.	J	##########			0	en	us		1	ar	application bad crash abnormally surprise bank country primitive application cant even simple things without freeze simple task like pay bill take least half hour due freeze seriously consider transfer salary bank poor application	Negative	1	1	1
Google Play Store	86eabb63-1bcd-462f-86dc-15edd8c10570	It's bad, it frequently crashes and unexpectedly exits the program, and it doesn't complete any transactions.	farraj Fahad	##########			0	en	us		1	ar	bad frequently crash unexpectedly exit program doesnt complete transactions	Negative	1	1	1
Google Play Store	fe643fbe-7627-4b0b-8c30-18caeb5c5010	Bad, especially recently it has become stupid, it annoys you and some features are locked, like sharing.	Abdulaziz Almujaybeil	##########			0	en	us		1	ar	bad especially recently become stupid annoy feature lock like share	Negative	1	0	0
Google Play Store	557b68e9-23db-489b-a939-39a740cc1f10	What is the benefit of the application if it does not inform me of my account balance? I receive my account balance as ****, it's neither numbers nor anything, just stars.	Wafi Bader Alotaibi	##########			0	en	us		1	ar	benefit application inform account balance receive account balance neither number anything star	Negative	0	1	0
Google Play Store	bccbd9ca-ee90-4138-92a6-10ee48e21ea5	The employees are respectful, but the banking system seems like it's from the Middle Ages.	Ahmed Khdawy	##########			1	en	us		1	ar	employees respectful bank system seem like middle age	Negative	1	0	0
Google Play Store	5b1c4471-e831-45f7-9044-7cbbf867ddb3	The application keeps logging me out and displaying "session ended".	Noor SQ	2023-07-06 07:59:00			1	en	us		1	ar	application keep log display session end	Negative	0	1	0
Google Play Store	fdedd4c5-21db-4aee-b8f1-96e38e6a2b4c	Very good.	Mohamed Shaker	2023-07-02 07:49:00			1	en	us		1	ar	good	Positive	0	0	0
Google Play Store	aba84560-3d7f-4f18-9a23-7f942fde4c07	The application does not work when I am outside the kingdom. It requires me to connect to the internet and set a default browser through an incoming call that costs 8.6 SAR. This means that every time I enter the country's internet, I have to pay 8.6 SAR. I will not deal with Bank Al Bilad or its application after I return, God willing.	Ahmed Shehata	##########			2	en	us		1	ar	application work outside kingdom require connect internet set default browser incoming call cost sar mean every time enter countrys internet pay sar deal bank al bilad application return god will	Negative	1	0	0
Google Play Store	441d44ed-4a2c-4aaf-9a68-7e42887a0560	It disconnects and always annoys me, very very very bad.	Mohammed Almuqrin	##########			0	en	us		1	ar	disconnect always annoy bad	Negative	1	0	0
Google Play Store	2e66a01b-9f35-44cb-bb90-7e4a121d5c47	Find a solution for your disgusting application.	Solfège	##########			0	en	us		1	ar	find solution disgust application	Negative	1	0	0
Google Play Store	054ed20a-696e-4ef4-a152-a942b6bb8cf4	The application has many problems.	Rami Charaf	##########			0	en	us		1	ar	application many problems	Negative	0	1	0
Google Play Store	f2124883-421b-496f-a383-d2e4bee412e3	You cannot insert fingerprint or quick response code to access the application, in addition to that, they have the worst customer service among banks.	〰	##########			0	en	us		1	ar	insert fingerprint quick response code access application addition bad customer service among bank	Negative	1	1	0
Google Play Store	55cd387e-dbb1-489a-bc08-962976abc90c	The Android application has become unbelievably bad, with numerous technical problems. The website is far better in many ways. I hope the application's issues will be fixed. Best regards.	Jamal Omar	##########			0	en	us		1	ar	android application become unbelievably bad numerous technical problems website far good many ways hope applications issue fix best regard	Negative	1	1	0
Google Play Store	9ac5c487-7f85-4268-8980-2411f87127c1	Unfortunately, your application does not accept transfers to either another account in Al Bilad Bank or other banks. We have been suffering from this issue for years, so where are you in resolving this problem? I request a fix.	Mashwhor Al Dakheel	##########			0	en	us		3	ar	unfortunately application accept transfer either another account al bilad bank bank suffer issue years resolve problem request fix	Negative	0	1	0
Google Play Store	7ec89eaa-3cbc-4483-a9f2-fec5b513ee17	A program that frustrates or annoys.	ليجيون - liGEOoON	##########			0	en	us		2	ar	program frustrate annoy	Negative	1	0	0
Google Play Store	1c4ceb72-ee49-44e5-9785-aeba786d516f	The app is very weak and always has problems. It crashes when you are in the middle of a transaction, and at best, it works very slowly. Of course, the technical support wastes your time without providing suitable and convenient solutions for the customer. I use three different banking apps, and I only face these basic issues in the app of this country.	Rocket man	2023-06-04 07:31:00			0	en	us		1	ar	app weak always problems crash middle transaction best work slowly course technical support waste time without provide suitable convenient solutions customer use three different bank apps face basic issue app country	Negative	1	1	1
Google Play Store	604bb074-b762-41ee-997a-e66dd2df513c	The program is not working and always displays "No internet connection" even though the device is connected and all other applications are working. Please solve this very annoying problem. Update: the rating has been increased due to the problem being resolved, the program is working fine now.	Emad Mohamed	##########			0	en	us		4	ar	program work always display internet connection even though device connect applications work please solve annoy problem update rat increase due problem resolve program work fine	Negative	1	1	0
Google Play Store	dd912302-e14b-40c2-8c51-21153d95f696	When I request a transfer of money from my savings account, the application freezes on the menu and does not move to the next one. The problem was resolved by returning the application's animations.	Mohammad Saadi	##########			0	en	us		3	ar	request transfer money savings account application freeze menu move next one problem resolve return applications animations	Negative	0	1	1
Google Play Store	979d3afb-4f2b-4560-aaf3-94fc18b1c9a9	The application is worse than bad. It always tells you that the password is incorrect, even though it is correct. I have tried to activate fingerprint verification a million times, and it still tells you that the number you entered is incorrect, even though it is correct. You can say that there is no banking application with such bad quality.	MohNajAki	##########			0	en	us		1	ar	application bad bad always tell password incorrect even though correct try activate fingerprint verification million time still tell number enter incorrect even though correct say bank application bad quality	Negative	1	1	0
Google Play Store	6384923c-b3cf-4f90-8c31-30d81bc2dd00	The application is very bad after the update. Whenever a function is performed, the program freezes and doesn't continue. You have to completely close it and reopen it, log in again, and continue your task, but it keeps freezing again and so on. We're exhausted, either update it properly or don't do anything.	Jeme Jam	##########			0	en	us		1	ar	application bad update whenever function perform program freeze doesnt continue completely close reopen log continue task keep freeze exhaust either update properly dont anything	Negative	1	1	1
Google Play Store	5fccce09-50c4-49d3-abc7-8a42cef55cac	Bad and outdated application, don't you have 20,000 riyals to develop a better application? Respected bank, but an awful application.	Sam	##########			0	en	us		1	ar	bad outdated application dont riyals develop good application respect bank awful application	Negative	1	0	0
Google Play Store	d7708f3c-0a8a-40c9-99c8-5087e53dddb2	The application performs well, but not excellently. However, we hope that the bank will improve the interface and make interbank transfers reach their destination on the same day. Currently, if you transfer after the official working hours to a foreign bank, the transfer will arrive the next day, even if the amount is less than 2500 riyals.	DaNGeR GaMeR	##########			0	en	us		4	ar	application perform well excellently however hope bank improve interface make interbank transfer reach destination day currently transfer official work hours foreign bank transfer arrive next day even amount less riyals	Neutral	1	0	0
Google Play Store	10854b22-9779-4d78-905c-ba756cb865c6	The app is so stupid, I swear it's the dumbest app I've ever encountered. It's the worst bank and customer service I've ever come across. The call center doesn't even answer the phone, and their branch services are completely unprofessional and trashy. The app just increases your stress levels, it's all garbage. Every time I need to renew my residency, I have to go to the branch to do it, another…	Obadah AL-Qudah	##########			0	en	us		1	ar	app stupid swear dumb app ive ever encounter bad bank customer service ive ever come across call center doesnt even answer phone branch service completely unprofessional trashy app increase stress level garbage every time need renew residency go branch another hassle idiots government apps ashamed im stupid one open account option rate less one star would give	Negative	1	0	0
Google Play Store	4b279b29-ae37-49e5-8890-af3bc83ae415	A dysfunctional application in which you can't do anything without an error message every minute. The first transfer must be done through a mobile message, followed by calls that aim to annoy the customer. Then it gives an error stating that there must be a 10 minute interval between each transfer. Glory be to Allah, a bank that rushes to go backwards. Learn from other banks.	Abdullah Bagazi	##########			0	en	us		1	ar	dysfunctional application cant anything without error message every minute first transfer must do mobile message follow call aim annoy customer give error state must minute interval transfer glory allah bank rush go backwards learn bank	Negative	1	1	0
Google Play Store	3ff343af-585e-4683-94c5-604f72613358	The application has become bad.	mahmoud elhawary054	##########			0	en	us		1	ar	application become bad	Negative	1	0	0
Google Play Store	2895e274-00ad-469e-80d4-2b4b9fbd95e8	They have a problem when entering from outside the kingdom. Please make sure to connect to the internet.	Mhmd Almadani	##########			1	en	us		2	ar	problem enter outside kingdom please make sure connect internet	Neutral	0	1	0
Google Play Store	e4a543d6-ea9b-42e1-bb2d-fbf2a7085ab0	Unfortunately, the country is still significantly behind in electronic services compared to Al Rajhi. The application updates never seem to end and any minor issue causes it to crash.	Abdullah Almalki	##########			1	en	us		1	ar	unfortunately country still significantly behind electronic service compare al rajhi application update never seem end minor issue cause crash	Negative	1	1	0
Google Play Store	68b8da24-d905-486a-b62d-7b73a24a9fd8	I swear, I'm planning to open an account in another bank because the application is so complicated and bad.	Saleh Alameri	##########			1	en	us		1	ar	swear im plan open account another bank application complicate bad	Negative	1	0	0
Google Play Store	c76a38b6-49fd-4d65-ba17-fcc1c3600712	Bad experience... and the app doesn't work sometimes.	Emad Al Shalak	##########			1	en	us		1	ar	bad experience app doesnt work sometimes	Negative	1	1	0
Google Play Store	0c9c6dbc-cdb9-4056-a49d-d8d241d2ed50	It has many malfunctions.	Mohammed Alrasheedi	##########			0	en	us		1	ar	many malfunction	Negative	1	1	0
Google Play Store	95f1fbd4-4df2-4d68-965d-efc951d4a19c	Very bad, unfortunately. I wish you could make the same app as Al Rajhi.	faisal h	##########			0	en	us		1	ar	bad unfortunately wish could make app al rajhi	Negative	1	0	0
Google Play Store	d95a64aa-feec-4a94-b2ed-91a3b0465b11	The worst bank application ever, always crashes and always logs me out, unfortunately. All banks are advancing in technology except for Albilad Bank.	Naif Rahbini	##########			0	en	us		1	ar	bad bank application ever always crash always log unfortunately bank advance technology except albilad bank	Negative	1	1	1
Google Play Store	9d44ecd3-8f1e-4e1e-a010-89acec556916	Very bad, constantly malfunctioning, asks for a restart, goes back to the beginning, doesn't open after updating.	mohammed abdelrahman	##########			0	en	us		1	ar	bad constantly malfunction ask restart go back begin doesnt open update	Negative	1	1	0
Google Play Store	fc24e89d-66e9-4fae-8112-95c238434dfd	A very, the worst application that doesn't work on Android devices. You cannot input or extract numbers. I do not recommend using it.	Maleb Aldhafeerie	##########			0	en	us		1	ar	bad application doesnt work android devices input extract number recommend use	Negative	1	1	0
Google Play Store	947c1762-9eaf-4cfd-90a5-f6b82bfa3e8b	It is slow and extremely heavy, everything needs a lot of time to load compared to other banking apps that are fast.	Mohamed Hassan	##########			0	en	us		1	ar	slow extremely heavy everything need lot time load compare bank apps fast	Negative	0	0	1
Google Play Store	1bc348f2-d610-42a3-94e6-b2c472d9d911	The application is excellent.	Iyad Abunawas	##########			0	en	us		5	ar	application excellent	Positive	0	0	0
Google Play Store	2dd3e438-9ebb-4343-9915-efbe7aab7bdf	If I could put a rating for a star, I would have given a failed rating. It has been more than three days since I have been trying to create an account, but I couldn't. The same excuse, the service is currently unavailable. When will the service be available?	Mohammed Khalid	##########			0	en	us		1	ar	could put rat star would give fail rat three days since try create account couldnt excuse service currently unavailable service available	Negative	1	1	0
Google Play Store	2855a9ea-62a3-4650-83b8-c2880e5c1455	Great, but a little heavy.	Feras Alghamdi	##########			0	en	us		4	ar	great little heavy	Positive	1	0	1
Google Play Store	8ae9a1f5-0999-49d4-be96-14716aeeb075	Excellent and fast.	Badr Alfifi	##########			0	en	us		5	ar	excellent fast	Positive	0	0	0
Google Play Store	17277a02-68d2-44ef-98df-3fc3b1f7bc49	I am always hesitant, nothing convinces me.	byna salim	##########			0	en	us		1	ar	always hesitant nothing convince	Negative	1	0	1
Google Play Store	707bf20d-c33b-4b4e-ac1d-24ca852d2b7c	It no longer works as before. The services have become unavailable and they hang when trying to open them.	Nabeel Bondagji	##########			0	en	us		1	ar	long work service become unavailable hang try open	Negative	0	1	1
Google Play Store	a020c721-1ea7-4bfe-8d49-c44790a3f258	Very bad	Abdusalam Husain	##########			0	en	us		1	ar	bad	Negative	1	0	0
Google Play Store	7ba60796-23ea-420f-a860-a13ad2338ec8	The bank is worth billions, and the application is worth billions. The essential services that should be available are not available, and besides the poor design, you do not know how to reach what you want.	AB	##########			0	en	us		2	ar	bank worth billions application worth billions essential service available available besides poor design know reach want	Negative	1	0	0
Google Play Store	cd2d736b-e7c2-4e5a-be0a-c1521a210c52	I haven't been able to access my account on the mobile application for two days. Can you help me?	Mostafa Tawfiq	##########			0	en	us		5	ar	havent able access account mobile application two days help	Negative	0	1	0
Google Play Store	1df33675-3aa6-49c6-b997-ce15f9c5211b	I cannot add only a Hijri date, I need to add a Gregorian date as well.	Aesso	##########			0	en	us		1	ar	add hijri date need add gregorian date well	Neutral	0	1	0
Google Play Store	8f40bfb2-6288-4f9e-af67-f61daf63dc1f	"The bank is bad and I do not recommend dealing with them, truthfully. Imagine, my dear friends, I had to constantly push them to take my rights, and when the time came for me to go on a mission outside of the Kingdom to restructure, they caused my services to be suspended because they refused anything other than the full installment, even though the system allows for restructuring."	Mark	##########			0	en	us		1	ar	bank bad recommend deal truthfully imagine dear friends constantly push take right time come go mission outside kingdom restructure cause service suspend refuse anything full installment even though system allow restructure	Negative	1	0	1
Google Play Store	3506124f-5002-41bd-906d-30290181c34e	Bad and stuck.	Elmgdad Hamed	##########			0	en	us		1	ar	bad stick	Negative	1	0	1
Google Play Store	42aaebd5-a37e-43be-bc83-40b0ace03977	nice Ebony	Ayyub Jind 125 Jind 125	##########			0	en	us		5	ar	nice ebony	Positive	0	0	0
Google Play Store	c2666b6e-7c7b-468a-8725-84112f90c39c	Excellence	FJJM	##########			0	en	us		5	ar	excellence	Positive	0	0	0
Google Play Store	41a2c219-a747-4672-81db-336e5722f847	More than wonderful.	mohamed abo khalifa	##########			0	en	us		5	ar	wonderful	Positive	0	0	0
Google Play Store	9b280516-e680-4d5c-914b-4ad672f94344	Garbage application	Omar Alattas	##########			0	en	us		1	ar	garbage application	Negative	1	1	1
Google Play Store	a18bad14-4189-4fc5-9da4-67b63e7757ad	Okay, it's very exhausting.. The login problems have been recurring noticeably in the past period, and unfortunately there is no real response from the relevant administration.	Abdulhakim Alsaeed	##########			0	en	us		1	ar	okay exhaust login problems recur noticeably past period unfortunately real response relevant administration	Negative	1	1	0
Google Play Store	d34ee0f8-aea4-4112-a22c-4ce96dc6f924	Very bad, and it is not befitting the reputation and status of Bank Al Bilad.. A statement for Islamic banking.. Unfortunately, many errors and technical problems, I hope to emulate Al Rajhi Bank and Alinma Bank in digital banking.	zaid abdul-Aziz	##########			0	en	us		5	ar	bad befit reputation status bank al bilad statement islamic bank unfortunately many errors technical problems hope emulate al rajhi bank alinma bank digital bank	Negative	1	0	0
Google Play Store	6e9fdb86-6ebc-4eb9-9a23-eae61a80d6c8	"The activation of fingerprint is complex."	Saad Hashmi	##########			0	en	us		1	ar	activation fingerprint complex	Neutral	1	1	0
Google Play Store	0a977a98-8275-4640-8e81-5a13c4c4dea6	The application has technical problems and causes incorrect transfers. Despite contacting the bank, filing complaints and sending letters, there was no response.	‫المنتدى العلمي ”‪Scientific Forum‬‏“‬‎	##########			0	en	us		1	ar	application technical problems cause incorrect transfer despite contact bank file complaints send letter response	Negative	0	1	0
Google Play Store	46f5d695-96a4-4851-bd59-8bbfcf5af62b	The connection always gets disconnected and asks to verify it, even though the connection is 100% available.	محمد عبدالله	2022-08-04 02:29:00			0	en	us		1	ar	connection always get disconnect ask verify even though connection available	Negative	0	1	0
Google Play Store	01418759-5fab-491a-856f-07b47c4beec9	The application, every time I try to create an account after completing everything, it says that the service is unavailable, please try again later.	/: lol	##########			0	en	us		2	ar	application every time try create account complete everything say service unavailable please try late	Negative	0	1	0
Google Play Store	6b5db662-ce5c-4c9d-a5b0-775a89354775	The worst bank in Saudi Arabia.	Mohammad Makki	##########			0	en	us		1	ar	bad bank saudi arabia	Negative	1	0	0
Google Play Store	472cd346-c784-4db9-b3aa-be273572acf1	Your application is very bad, you need to find a solution. It's not acceptable for a bank as big as Banque Al Bilad to have such a malfunctioning application. I have been trying for over 15 minutes to transfer money but it keeps crashing and failing, it's a failure on your part. You don't know how to manage accounts and the employees in charge of it are ignorant. This is causing unnecessary stres…	Zeyad Devil	##########			0	en	us		1	ar	application bad need find solution acceptable bank big banque al bilad malfunction application try minutes transfer money keep crash fail failure part dont know manage account employees charge ignorant cause unnecessary stress unacceptable truly unacceptable empty talk	Negative	1	1	0
Google Play Store	6207bc15-4148-4528-ae0f-dd1248e1a2e0	The application is very bad. I entered all the required data and then it gave me an error message. After that, it informed me that I can't log in after several attempts, even though it was my first attempt.	مالك الحموي	##########			0	en	us		1	ar	application bad enter require data give error message inform cant log several attempt even though first attempt	Negative	1	1	0
Google Play Store	8c2db4c6-ebc6-4c6d-a850-f18efc01a398	Catastrophic errors in the application. First: When I try to make an international transfer to the United States, it gives me a very long list of American banks and I have to search among them until I find the right one. There should be an option to search by bank name. Second: When making the transfer, in order for my transfer to be accepted by the receiving party, I have to write numbers in the…	Nawaf M	##########			0	en	us		1	ar	catastrophic errors application first try make international transfer unite state give long list american bank search among find right one option search bank name second make transfer order transfer accept receive party write number description however write number description transfer reject response english even though fill developers english performance	Negative	1	1	0
Google Play Store	65370470-2651-4eee-8e63-bc3088eb114d	Easy and fast application.	Mohamed Eltahan	2022-06-08 09:54:00			0	en	us		5	ar	easy fast application	Positive	0	0	0
Google Play Store	ce22bc51-6b34-40b8-88c6-18b83fbd4a5a	The application is slow and outdated in design, it needs development.	Zuhair Almusaylim	##########			0	en	us		1	ar	application slow outdated design need development	Negative	1	0	1
Google Play Store	b388a09d-616a-47ca-8301-71f7f350fe76	I hope someone goes to the Bank Al-Bilad branch where those who are still living in 2007 and brings them out of the darkness and brings them to us in 2022. The weakest banking application in Saudi Arabia without any dispute is the first and last reason why I try to avoid banking transactions with them due to their poor application. 👎🏼	LateNite	##########			1	en	us		1	ar	hope someone go bank albilad branch still live bring darkness bring us weak bank application saudi arabia without dispute first last reason try avoid bank transactions due poor application	Negative	1	0	0
Google Play Store	7d393033-19ac-42f6-be7b-cd1a9189caa2	Every time I try to log into the application, it prevents me from accessing my account and forces me to update, even though there is no update available. Please solve the problem.	Abdulrahim Alnoamani	##########			0	en	us		3	ar	every time try log application prevent access account force update even though update available please solve problem	Negative	0	1	0
Google Play Store	992af280-8e07-4888-87d6-0afd78979e53	It always freezes and crashes, especially on Android. As for the iPhone, it also freezes but I have to exit the app and open it again. This has been going on for a while now.	Osama Mussad	##########			0	en	us		2	ar	always freeze crash especially android iphone also freeze exit app open go	Negative	0	1	1
Google Play Store	cb4a6024-6bfa-447c-a6f2-2607d7fcc222	Thank you, guys...	Mo' Qarawi	##########			0	en	us		5	ar	thank guy	Positive	0	0	0
Google Play Store	34947b9b-b938-463d-b8db-554d8a25c74e	The application continues for a few seconds after logging in, then automatically logs out, and sometimes when logging in, it gives an error and asks to try again later.	Mohammed Alarabi	##########			0	en	us		1	ar	application continue second log automatically log sometimes log give error ask try late	Negative	0	1	0
Google Play Store	7527c20c-6934-45a5-86d8-a18ab3978566	I like Bank Al Bilad.	Waqas Ali	##########			0	en	us		5	ar	like bank al bilad	Positive	0	0	0
Google Play Store	1ad41359-e2da-47bf-975a-f007c8e9e7eb	The application is excellent, but there has been a problem for some time now. After completing any local or international transfer, when sharing the transfer voucher, pressing the "share" button exits the application completely and it is not possible to share the transfer receipt. Please fix this issue as soon as possible.	salama ahmed	##########			0	en	us		4	ar	application excellent problem time complete local international transfer share transfer voucher press share button exit application completely possible share transfer receipt please fix issue soon possible	Negative	0	1	0
Google Play Store	0ccd9a59-f53b-48a3-8076-c8f728ad0df4	Very bad.	Mustafa Hossam	##########			0	en	us		1	ar	bad	Negative	1	0	0
Google Play Store	15cfd6f4-ae89-4b29-97b6-4e8341493b92	You won't find a worse application than the one at the poorest bank in the world, MHB Bank, with a capital of 10 billion.	Abdulrahman Alrasheed	##########			0	en	us		1	ar	wont find bad application one poor bank world mhb bank capital billion	Negative	1	0	0
Google Play Store	aa7ad48b-d0bc-40fc-968c-422886a30d4e	In need of much improvement and enhancement.	abu turki	##########			0	en	us		1	ar	need much improvement enhancement	Neutral	1	0	0
Google Play Store	1605c299-ad92-4bf3-80bb-2db879e0fc1f	The message "Please make sure you are connected to the network and the application does not open" is embarrassing. A bank should not have such issues with its services, especially at this stage of advancement and technology.	abdallah al naser	##########			0	en	us		1	ar	message please make sure connect network application open embarrass bank issue service especially stage advancement technology	Negative	1	1	0
Google Play Store	3911c568-c679-4380-8b95-d3fe18079e2b	The application is not working. Please fix the problem.	Mohammed Banaga	##########			0	en	us		1	ar	application work please fix problem	Negative	0	1	0
Google Play Store	85c8ebab-b980-4713-8959-9e42de20e8f6	Available for use.	Zahoor Ahmad Dir kpk	##########			0	en	us		5	ar	available use	Neutral	0	1	0
Google Play Store	23893049-7bd9-426b-bdc4-24e8e0a23600	There is a problem with the program that prevents you from joining and creating an account. We want a solution to this problem and we want a response, not to leave it unresolved.	LOUIFI BASSET	2022-02-04 08:37:00			4	fr	us		1	ar	problem program prevent join create account want solution problem want response leave unresolved	Negative	1	1	0
Google Play Store	21ddbe10-59e5-4a36-a779-cb538a9e22ff	A worthless program with no benefit.	Trifa Fatah	##########			0	de	us		1	ar	worthless program benefit	Negative	1	0	0
Google Play Store	9f35085b-52ed-4d5b-b599-7a15405fb69a	The application is bad and has many problems.	Ahmed AbdELsalam	##########			0	ar	us		2	ar	application bad many problems	Negative	1	0	0
Google Play Store	a6630f5d-78f5-431a-9b28-22436ca5d9ae	Very, very, very, very, very, very excellent.	خالد الشريف	##########			0	ar	us		5	ar	excellent	Positive	0	0	0
Google Play Store	6c1fa94a-feb8-483d-a06d-ddcda3fcd5d3	Bad, bad, bad	بدر العوفي	##########			0	ar	us		1	ar	bad bad bad	Negative	1	0	0
Google Play Store	5e627ae4-129e-4f0e-adcf-c181e512f813	I have been trying to enter but it keeps rejecting me, so I entered through the browser, which worked well.	‪Suhaim (‫ابو فيصل‬‎)‬‏	##########			0	ar	us		1	ar	try enter keep reject enter browser work well	Neutral	0	1	0
Google Play Store	dc485130-be54-4454-b1f5-09d81e72367d	There are many stars on it, I have not been able to log in to my account for two days.	أحمد جوش	##########			0	ar	us		1	ar	many star able log account two days	Negative	0	1	0
Google Play Store	715685b0-2d0d-43eb-8278-78cee899deb2	If there is less than a star, I would give it a worse rating because it doesn't serve you and it constantly hangs.	رحال العالم	##########			0	ar	us		1	ar	less star would give bad rat doesnt serve constantly hang	Negative	1	0	1
Google Play Store	ff504434-83e0-445f-970d-0cb9425e2704	Hello and peace be upon you. If you please, the application was initially excellent, may Allah bless it. However, now it has some issues, such as sometimes showing that the service is unavailable and closing the program. I have to log in again. Sometimes it freezes, may Allah help us. I hope you find a solution to this problem. By the way, Bank Al Bilad is my number one bank and may Allah grant s…	مبارك	##########			0	ar	us		5	ar	hello peace upon please application initially excellent may allah bless however issue sometimes show service unavailable close program log sometimes freeze may allah help us hope find solution problem way bank al bilad number one bank may allah grant success charge include administrators employees thank	Positive	1	1	1
Google Play Store	2d15e263-e0cb-4c87-8cba-b5530edfce4a	Very bad in conversion and in everything, unfortunately.	عبدالرحمن aa	##########			1	ar	us		1	ar	bad conversion everything unfortunately	Negative	1	0	0
Google Play Store	53a1c889-72a1-4c71-b62e-d46ff4e888f0	A complicated and slow system, I regret that I opened an account with them.	فارســ ـ نــ,ٰـجــ,ٰـد 50٢	##########			2	ar	us		1	ar	complicate slow system regret open account	Negative	1	1	1
Google Play Store	3caa165e-5d75-4268-9be5-c1f09ae8fdcc	The application indicates poor management behind this bank, and it is very late in keeping up with other banks. I transferred 17,000 and I had another transfer that mentioned that the daily transfer amount exceeded the limit. The bank needs another 10 years to reach an advanced level of electronic services.	HASSAN R	##########			3	ar	us		1	ar	application indicate poor management behind bank late keep bank transfer another transfer mention daily transfer amount exceed limit bank need another years reach advance level electronic service	Negative	1	0	0
Google Play Store	0c08f06e-2604-451e-b755-482ae99e18f2	It's very bad, every day I try to register and it doesn't work.	عبد الناصر المقطري	##########			1	ar	us		1	ar	bad every day try register doesnt work	Negative	1	1	0
Google Play Store	d4dffdfb-5540-4d64-afbf-b7252eb8b69c	After the latest update, the application crashes and gives you a message saying that the login time has expired and the network message is not secure. I have changed networks multiple times, but the same problem persists.	عبد الرحمن عثمان	##########			0	ar	us		1	ar	late update application crash give message say login time expire network message secure change network multiple time problem persist	Negative	0	1	1
Google Play Store	0c955ba2-d225-4f70-b135-d911038b4222	The application is very bad, very slow. It's the first time in my life that I see a banking application with such poor quality. Their idea is only good, but they have old ATMs and the application itself is living in the 90s. 🤗	M.87nn	##########			0	ar	us		1	ar	application bad slow first time life see bank application poor quality idea good old atms application live	Negative	1	0	1
Google Play Store	2894b131-9b91-4887-8542-212e198f3ad7	Beautiful in appearance and elegance.	S a K	##########			0	ar	us		5	ar	beautiful appearance elegance	Positive	0	0	0
Google Play Store	fb8cfa50-47d7-489c-a869-dee7c82b4b50	Just one star to comment, otherwise you don't deserve it. If there was a negative star, I would give you 5 stars from the worst applications I have ever encountered.	Goodness 2020	##########			0	ar	us		1	ar	one star comment otherwise dont deserve negative star would give star bad applications ever encounter	Negative	1	0	0
Google Play Store	4bde6127-1e0a-4fc0-9637-3780242fab98	In the latest update, there is a problem where after logging in and before performing any transaction, it takes you back to the login page again.	mohammed babiker	2023-09-09 07:21:00			1	ar	us		2	ar	late update problem log perform transaction take back login page	Negative	0	1	0
Google Play Store	73d71be9-f8d2-4287-a4f1-51ab86d133e1	Zai Al-bad Application	Ronza hx	2023-09-08 02:43:00			0	ar	us		1	ar	zai albad application	Neutral	1	0	0
Google Play Store	1458f6bc-7510-4708-bb2a-af6681640eac	With all the software updates, it has become worse and I feel that these updates are what made it bad... Despite all the billions you have, you can't find a competent programmer to fix the program. What nonsense is this? Every time we enter the program, it gives you a message saying the session has ended or it's currently unavailable, and we can't do anything. The task that shouldn't take more th…	Turki !	##########			0	ar	us		1	ar	software update become bad feel update make bad despite billions cant find competent programmer fix program nonsense every time enter program give message say session end currently unavailable cant anything task shouldnt take five minutes end take thirty minutes like add activate account make hate everything	Negative	1	1	0
Google Play Store	507be942-b2db-48f8-b252-45b420964610	The worst bank application.	anas al-taf	##########			0	ar	us		1	ar	bad bank application	Negative	1	0	0
Google Play Store	305b9b8b-c3c6-40cb-b07d-c83859f3e65a	We hope to develop ahead of our competitors.	NAIF ALMEHIAWE	##########			13	ar	us		1	ar	hope develop ahead competitors	Positive	1	0	0
Google Play Store	35b75ddd-92fe-40f7-8b6f-c93bf71035c0	The star is a loss, it's the worst application with poor services and no development.	ishah mohammad	##########			1	ar	us		1	ar	star loss bad application poor service development	Negative	1	0	0
Google Play Store	bce89ec8-a081-4629-b690-1f80a875315a	Disgusting. The worst treatment that you can receive from customer service when you transfer money and it doesn't arrive, and they deduct the amount from you. I filed 5 complaints and no one responded to me. God, the employee tells me "what should I do for you?" He says there is no solution and all you can do is be patient.	sindbad Mohamed	2023-09-05 04:14:00			0	ar	us		1	ar	disgust bad treatment receive customer service transfer money doesnt arrive deduct amount file complaints one respond god employee tell say solution patient	Negative	1	1	0
Google Play Store	0230d3d7-1322-4ac2-95fc-39cb81b5f911	Failed application and developing for the worse. May God reward the bank's customers for their patience in the midst of its constant disappointment. You may not be able to make transfers as it might suddenly stop working or suddenly close, informing you that the account number is wrong despite its accuracy. Do not retry, and if you are sure, your account will be closed if you try again. It may ap…	جاري الكتابه	##########			0	ar	us		1	ar	fail application develop bad may god reward bank customers patience midst constant disappointment may able make transfer might suddenly stop work suddenly close inform account number wrong despite accuracy retry sure account close try may apologize unavailability service suddenly delete invoice suddenly impossible predict happen suddenly	Negative	1	1	0
Google Play Store	1c574df0-4dcb-4bc9-b330-33c9513dae88	Very bad, instead of making the process easier for the customer, it has become more difficult. You have to try several times to make a transaction, sometimes you have an urgent and important transfer but you end up being delayed for 10 minutes to half an hour, or maybe even more, just for a simple transfer that should take a minute. It's very disappointing and needs improvement. It's not suitable…	أبو خالد	##########			11	ar	us		1	ar	bad instead make process easy customer become difficult try several time make transaction sometimes urgent important transfer end delay minutes half hour maybe even simple transfer take minute disappoint need improvement suitable bank disrespectful customers	Negative	1	0	1
Google Play Store	f05d6981-87d0-4d98-b065-a9c51e330f4d	the worst application that hangs and crashes suddenly	Ibrahim Ali	2023-09-03 04:14:00			0	ar	us		1	ar	bad application hang crash suddenly	Negative	1	1	1
Google Play Store	42fe8377-dd85-41d4-bedc-eada7467e2a9	"The application is very bad compared to all the other banks, especially Al Bilad Bank."	مراد Dmam	2023-09-03 03:28:00			0	ar	us		1	ar	application bad compare bank especially al bilad bank	Negative	1	0	0
Google Play Store	052091c6-7280-4e74-9f65-5e7b393e2bcf	Very very very destructive, for three days I've been trying to transfer and today I couldn't find any bills, all of them have been deleted. I gave it a star just to write a comment, otherwise I would delete it.	ابو غازي aa	2023-09-02 04:27:00			3	ar	us		1	ar	destructive three days ive try transfer today couldnt find bill delete give star write comment otherwise would delete	Negative	0	1	0
Google Play Store	6442f3ca-9808-4595-ab78-22b19c9fe750	Notification: when adding a beneficiary (local), the IBAN length (last four digits) is not accepted.	عبدالله مصطفى محمد	##########			1	ar	us		5	ar	notification add beneficiary local iban length last four digits accept	Negative	0	1	0
Google Play Store	adf01d7c-2172-4627-8167-98a89349eacc	I am tired and I say it's bad.. it needs a lot of improvements.	الأمل شاه بهاي	2023-09-01 08:49:00			0	ar	us		1	ar	tire say bad need lot improvements	Negative	1	0	0
Google Play Store	1d13fc56-f960-4cb5-b978-827041b73004	The application is very bad, it crashes out of the system for no reason and operations are not completed.	Turki	2023-09-01 08:48:00			4	ar	us		2	ar	application bad crash system reason operations complete	Negative	1	1	1
Google Play Store	03fe19e2-6291-44c3-8a0b-fe71114e81aa	The worst application.	Ibrahim Elnagr	##########			0	ar	us		1	ar	bad application	Negative	1	0	0
Google Play Store	9d00b7fb-0562-4fca-a3bb-fc33596cebbd	The worst application compared to any other bank, tried it twenty times just to transfer.	Abid Saad	##########			0	ar	us		1	ar	bad application compare bank try twenty time transfer	Negative	1	1	0
Google Play Store	0ed5e4cc-32b7-4714-9ac1-e442cdf4e5a8	Most of the problems are technical. The login delay and the app always showing "no internet connection" Beautiful Bank serves you from home. The app design is very bad and primitive.	K Z	##########			0	ar	us		4	ar	problems technical login delay app always show internet connection beautiful bank serve home app design bad primitive	Negative	1	1	1
Google Play Store	9fde41e6-6c7f-430d-91f9-be4bf1791520	The application is very bad.	عاصم شومان	##########			0	ar	us		1	ar	application bad	Negative	1	0	0
Google Play Store	6048b73b-e6f9-4992-a30e-efa094fe401f	Excellence/beauty	حمود دخيل	##########			0	ar	us		5	ar	excellencebeauty	Positive	0	0	0
Google Play Store	60689ebc-e468-47a8-a7d4-31431f6e3538	Disgusting. It burns the liver. 🤢😡	Obed Al-Hafiz	##########			0	ar	us		1	ar	disgust burn liver	Negative	1	0	0
Google Play Store	8addaee3-ad6c-48e4-b7b2-6154f2c3ff29	If there is a bank worse than this, it deserves the worst treatment I have ever experienced.	خالد العسيري	##########			0	ar	us		1	ar	bank bad deserve bad treatment ever experience	Negative	1	0	0
Google Play Store	8406482d-1474-4170-8b8d-d7796384fa79	The system has been down for more than 4 days.	Ahmed Atrees	##########			0	ar	us		1	ar	system days	Negative	0	1	0
Google Play Store	5d77c1e7-43e4-4be0-936b-541249c5f839	"The worst banking application, its problems are in transfers, login, and it frequently logs you out of the app. Improve your work with regret, I regret the day I linked myself to a loan with Al Bilad Bank. Branch systems constantly malfunction, as for the (Hungerstation) application, it is faster and smarter than it. I have reached a point where I withdraw everything from my account to another a…	K.N.S	##########			4	ar	us		1	ar	bad bank application problems transfer login frequently log app improve work regret regret day link loan al bilad bank branch systems constantly malfunction hungerstation application fast smart reach point withdraw everything account another account due lack trust bank service time need	Negative	1	1	0
Google Play Store	58f39099-d364-4369-946e-83432b47989d	A failed and faulty application, but the problem is that we cannot change it due to the mandatory salary deposit in the bank. We hope that the bank would care about its customers like other banks.	عبد العزيز صالح	##########			0	ar	us		2	ar	fail faulty application problem change due mandatory salary deposit bank hope bank would care customers like bank	Negative	1	1	0
Google Play Store	35b4283a-62c8-4d70-82f9-3c01ffdfd836	Very, very bad, and it seems that I have messed up my bank accounts all together.	عفوك يا الله	##########			0	ar	us		1	ar	bad seem mess bank account together	Negative	1	0	0
Google Play Store	5b537031-1cc1-44bd-801e-d0a441540e00	The worst application in banking applications.	KHALID ALQURASHI	##########			0	ar	us		1	ar	bad application bank applications	Negative	1	0	0
Google Play Store	f0252433-3f67-41ae-bb13-59a41ad8252f	By Allah, it doesn't even deserve zero, it is a very despicable application, worse than bad.	mohamed yousry	##########			0	ar	us		1	ar	allah doesnt even deserve zero despicable application bad bad	Negative	1	0	0
Google Play Store	d3351d15-6587-451b-9bcc-81820f89e25a	The application has become very, very bad.	عبدالشكور عيسى	##########			0	ar	us		1	ar	application become bad	Negative	1	0	0
Google Play Store	d9889b99-2afb-4ffc-b983-046809d4a8a6	I am unable to complete the transfer process and receive a message stating "Service Unavailable, please try again later" with an Android version for Huawei mobile. *The problem has been persisting for over two weeks.	مستخدم Google	##########			21	ar	us		1	ar	unable complete transfer process receive message state service unavailable please try late android version huawei mobile problem persist two weeks	Negative	0	1	0
Google Play Store	ab613c4e-7f9f-497c-bde7-09e81e84aa4f	It has become impossible to drive."	وسيم العواضي	##########			0	ar	us		1	ar	become impossible drive	Negative	1	0	0
Google Play Store	16984db2-6b10-48dc-a4ec-2da832f76da6	The worst banking application you can use.	abu abadi	##########			0	ar	us		1	ar	bad bank application use	Negative	1	0	0
Google Play Store	84c14194-7704-4965-a12f-43d23c76d97f	The program has become very bad recently after the updates.	A. Medraj	##########			2	ar	us		3	ar	program become bad recently update	Negative	1	0	0
Google Play Store	b9cf2c5a-ac25-41e2-accd-219e1eab34fe	Give us the best you have. This application has a lot of comments...	فهد ال رشيد	##########			0	ar	us		1	ar	give us best application lot comment	Neutral	0	0	0
Google Play Store	afff0888-e15d-4035-9778-b53a6d2b88a9	Trust me, stay away from it. It is the worst bank in the world.	بدر الهدلاني	##########			0	ar	us		1	ar	trust stay away bad bank world	Negative	1	0	0
Google Play Store	6a00de10-dd2f-4594-be14-c27484abd250	Bad and laggy, it used to be excellent in the past but now it is very slow despite continuous updates.	جهاد زنقوطي	##########			5	ar	us		2	ar	bad laggy use excellent past slow despite continuous update	Negative	1	0	1
Google Play Store	cdecc085-3669-4c57-80c2-2cb8e670b435	Why is it that every time I try to transfer any amount from another bank to the country, it fails? It says that the beneficiary's account is either inactive or prohibited. Please help us resolve this.	Abd Ab	##########			0	ar	us		3	ar	every time try transfer amount another bank country fail say beneficiarys account either inactive prohibit please help us resolve	Negative	0	1	0
Google Play Store	1fe2bff3-c200-4a22-b863-65ef4d329629	The application and website are very, very bad. It is very difficult to log in and execute operations. The application is very primitive. It's frustrating that we have commitments with the bank and in a minute we decide to leave the bank. May God help us, we are forced.	Abdulaziz AlSehli	##########			16	ar	us		1	ar	application website bad difficult log execute operations application primitive frustrate commitments bank minute decide leave bank may god help us force	Negative	1	0	1
Google Play Store	1b1c6920-323b-44fa-83f8-f1ab2c6bfe98	Very bad application	احمد عبدالله	##########			0	ar	us		1	ar	bad application	Negative	1	0	0
Google Play Store	ee49cdf5-21f7-45a6-8a72-7883d7ada1ff	The application keeps crashing on me all the time, and it gives me a failed attempt message multiple times during any operation.	رحال رحلات	##########			0	ar	us		1	ar	application keep crash time give fail attempt message multiple time operation	Negative	0	1	1
Google Play Store	8b268037-0f25-4640-834b-39ef3ad908cb	Very bad.. to the point where you need to delete the application and reinstall it every once in a while in order to access your account.	abdulQader baWazeer	##########			6	ar	us		1	ar	bad point need delete application reinstall every order access account	Negative	1	0	0
Google Play Store	0c78ba60-bb3a-434f-9ea0-1ee8adbf5461	The application is veryyyyyyyyyyyyyyy slowwwwwwwwwwwwww.	ahmed gamal	##########			0	ar	us		1	ar	application veryyyyyyyyyyyyyyy slowwwwwwwwwwwwww	Negative	0	0	1
Google Play Store	2506db44-9f67-42cb-a7c7-47656c033d79	The application is very bad in transactions, transfers, and authentication. I swear, it is impossible for you to find good technical support, and it is impossible for you to have delayed with your money.	Khalid Rider - تساهيل	##########			2	ar	us		1	ar	application bad transactions transfer authentication swear impossible find good technical support impossible delay money	Negative	1	1	1
Google Play Store	a938dac8-8e83-4af9-95d5-53d01c25e635	He is very critical and unpleasant.	عبدالرحمن الاسمري	##########			0	ar	us		1	ar	critical unpleasant	Negative	1	0	0
Google Play Store	1432e2c8-835b-4fef-afbe-56aaf09ccd1a	The application is very weak.	سليمان الشريف	##########			0	ar	us		2	ar	application weak	Negative	1	0	0
Google Play Store	d8d79924-84b1-4981-9620-e6f5e03dbb61	The application used to be excellent, but instead of improving for the better, it has become trash. Banks compete to be the best, while the country is deteriorating. Fix the application before we transfer our dealings and balance to other banks.	احمد محمد	##########			4	ar	us		1	ar	application use excellent instead improve good become trash bank compete best country deteriorate fix application transfer dealings balance bank	Negative	1	0	0
Google Play Store	012d1f57-9293-4b9b-a16d-c6facf5ba1e6	Heavy and requires a lot of account verification.	zmaa zmaa	##########			0	ar	us		2	ar	heavy require lot account verification	Neutral	0	0	1
Google Play Store	79ab8e60-1672-475d-a50a-8eac7ee6420a	The application has many problems.	وليد جبارة	##########			0	ar	us		1	ar	application many problems	Negative	0	1	0
Google Play Store	87b3e9de-2a0c-4b30-b0ec-c8b8069070ff	The application doesn't open and gives an error message saying that the service is not available at the moment, and if it does open, it rejects the transfer.	ابوجاسر الشعشوع	##########			0	ar	us		1	ar	application doesnt open give error message say service available moment open reject transfer	Negative	0	1	0
Google Play Store	c83abcf3-5e81-4457-80bd-03723433580b	The application freezes and doesn't switch quickly; multiple converters are needed in order to enter the application, which takes time.	محمد بن مسفر ال خضيره	##########			5	ar	us		1	ar	application freeze doesnt switch quickly multiple converters need order enter application take time	Negative	0	0	1
Google Play Store	b459fd37-212a-423f-91a9-05d9e8d1c955	Very bad	أبو عمر الحربي	##########			0	ar	us		1	ar	bad	Negative	1	0	0
Google Play Store	1b4ed322-e9d9-4342-b137-47a508c1e673	The bank Al-Balid is slow and disgusting, and it hinders your interests. I am currently in the process of switching to another bank.	s o	##########			2	ar	us		1	ar	bank albalid slow disgust hind interest currently process switch another bank	Negative	1	0	1
Google Play Store	d48de68c-5717-4238-ac85-54a6c3c060c9	I request an update for the application. Unfortunately, the application does not meet the standards of Banque Al-Bilad's services.	Sohaib Khoj	##########			0	ar	us		1	ar	request update application unfortunately application meet standards banque albilads service	Negative	1	1	0
Google Play Store	119d611d-6ef2-4416-8650-c47d810c724e	One of the worst banking applications programmatically is a sudden slow exit.	Abdullah Algomez	##########			0	ar	us		1	ar	one bad bank applications programmatically sudden slow exit	Negative	1	1	1
Google Play Store	9ee1d696-2204-4490-b683-ab1a5be529bf	I am bad and tired despite the continuous updates in order to perform any task that requires a lot of time.	ابوعبدالله	##########			1	ar	us		2	ar	bad tire despite continuous update order perform task require lot time	Negative	1	0	0
Google Play Store	d386fdd6-afee-4e49-9f12-a4fade9467c8	I hate this bank, its app, and its services. I advise you to stay away from them, as I am one of the advisers to you.	الا اله الا الله سبحان الله	##########			1	ar	us		1	ar	hate bank app service advise stay away one advisers	Negative	1	0	0
Google Play Store	a9988e89-4401-422b-af9e-a026116d0857	He suspends, withdraws, and verifies 10 times until he accepts.	Saeed Sa	##########			1	ar	us		2	ar	suspend withdraw verify time accept	Neutral	0	1	1
Google Play Store	56152ffe-287b-4ddc-ad6d-f1df93b67427	Recently, the application has become slow and crashes every day, with maintenance and updates. How long will this exhaustion continue?	صالح الغامدي	##########			6	ar	us		2	ar	recently application become slow crash every day maintenance update long exhaustion continue	Negative	1	1	1
Google Play Store	b9dfee97-f4a5-473b-8e34-185412678415	In the recent period, the Baha branch has not been allowing transfers from Sunday to Thursday. The system is saying that it is malfunctioning. Is the system malfunctioning for a whole week?	رافع العمراني	##########			1	ar	us		1	ar	recent period baha branch allow transfer sunday thursday system say malfunction system malfunction whole week	Negative	1	1	0
Google Play Store	163504e6-f913-4a6a-ad56-e7d2c642fdcc	The application has been slow for a while, unresponsive, and suddenly kicks me out and displays "session ended."	ام دانه	##########			8	ar	us		1	ar	application slow unresponsive suddenly kick display session end	Negative	0	0	1
Google Play Store	a1706c3a-c8e1-4534-be4b-0450d121cb23	The application is extremely slow. The application has been frustrating me since 2002, as every time I try to transfer an amount, I have to attempt 10 to 20 unsuccessful tries. Each time, the application kicks me out and gives me a message saying "Session ended." Please solve the problem as soon as possible.	عماد العبدلي	##########			41	ar	us		1	ar	application extremely slow application frustrate since every time try transfer amount attempt unsuccessful try time application kick give message say session end please solve problem soon possible	Negative	1	0	1
Google Play Store	3769f109-f897-487b-93ca-565c868fe537	Wonderful application and respectful service.	ahmed ramadan	##########			0	ar	us		5	ar	wonderful application respectful service	Positive	0	0	0
Google Play Store	32aa363c-e150-4861-a39c-0251d224bd3f	There are many comments when executing operations and it exits the program without a reason. Please solve these problems, if possible.	Silver Guitar	##########			5	ar	us		2	ar	many comment execute operations exit program without reason please solve problems possible	Negative	0	1	0
Google Play Store	13a374ec-f835-4b42-b56e-91c623375552	I went to the bank for five days, by Allah. Every time I go to check, they say the system is down. Well, what can someone do if they have an urgent matter?	ابو راكان اليماني	##########			0	ar	us		1	ar	go bank five days allah every time go check say system well someone urgent matter	Negative	0	0	0
Google Play Store	97e03533-da43-4572-94b7-88df6c4b0f00	I guess you mean "I recommend an application on planet Earth 🌎".	Doo Scod	##########			0	ar	us		1	ar	guess mean recommend application planet earth	Neutral	1	0	0
Google Play Store	7321cbcb-f22b-4e8e-acbc-edb1d589cc1e	Failed application	Ahmed Hasan	##########			0	ar	us		1	ar	fail application	Negative	0	1	0
Google Play Store	da6f5ea3-76b0-4f30-b9c6-b47dad7fbbde	It is unavailable or does not accept adding a beneficiary. I do not know why they have put a bank.	عبدالله محمد	##########			0	ar	us		1	ar	unavailable accept add beneficiary know put bank	Negative	0	1	0
Google Play Store	fca30fdd-a7cf-4352-a340-ca43207df157	When will the application be updated and made to work properly like other banks? It is very bad.	ماجد السيناني	##########			6	ar	us		1	ar	application update make work properly like bank bad	Negative	1	1	0
Google Play Store	42e7db87-39aa-49de-9786-cd02a023bfa6	A distinguished bank indeed.	khaled alhothly	##########			0	ar	us		5	ar	distinguish bank indeed	Positive	1	0	0
Google Play Store	d7c81e5f-d8bc-4d7a-a865-4e7e48f0b96e	The worst application I have ever experienced in my life.	Ahmed Mohidin	##########			0	ar	us		1	ar	bad application ever experience life	Negative	1	0	0
Google Play Store	303ad2ce-2a7d-4f46-a45a-e85ab4d5ef9b	Despite the poor implementation and the long time in this condition, the bank did not think to solve the problem. The application freezes and suddenly exits, and no transaction can be completed without great difficulty. Some restaurant applications are better than it.	Abu Nahar	##########			5	ar	us		1	ar	despite poor implementation long time condition bank think solve problem application freeze suddenly exit transaction complete without great difficulty restaurant applications good	Negative	1	1	1
Google Play Store	9961094d-ac79-47e0-8354-089ba850b443	Very very bad and it gets stuck, I mean the bank is supposed to be very fast.	عبدالعزيز محمد	##########			8	ar	us		1	ar	bad get stick mean bank suppose fast	Negative	1	0	1
Google Play Store	32368daf-1baf-4b40-8ed7-40df7794e157	They were neglectful; they did not care about the application.	Winston Flood	##########			0	ar	us		1	ar	neglectful care application	Negative	1	0	0
Google Play Store	e0118c9a-ac0b-439a-991d-c9dd4b628d6f	The application is very, very, very bad and primitive. How can a banking application be in this form? It has no design, no programming, and nothing modern at all. It can never be compared to other banking applications.	ßassam	##########			2	ar	us		1	ar	application bad primitive bank application form design program nothing modern never compare bank applications	Negative	1	0	0
Google Play Store	f0cbdf9f-47bc-4706-af07-fc68ee15cba6	The best option is not free from technical problems, especially when making transfers.	Ahmed Abouelmaaref	##########			9	ar	us		2	ar	best option free technical problems especially make transfer	Neutral	1	1	0
Google Play Store	b3bf7238-a78a-44f3-8de7-a2b3adf13480	The worst banking application, a piece of advice, the bank doesn't care about its electronic services, don't even think about it.	Amer Mhmd	##########			0	ar	us		1	ar	bad bank application piece advice bank doesnt care electronic service dont even think	Negative	1	0	0
Google Play Store	eae72fa5-f3c1-46f4-9d92-8b2dcb90a039	Beautiful	مزعل الشلاحي	##########			0	ar	us		5	ar	beautiful	Positive	0	0	0
Google Play Store	e68fa7af-ad62-404d-b8a7-005403fb7602	"The device documentation claimed that it is playable, but then it started speaking English, not knowing that I am an Arab and they made it difficult for people."	Khaled Khrmi	2023-08-07 01:02:00			0	ar	us		1	ar	device documentation claim playable start speak english know arab make difficult people	Negative	1	0	0
Google Play Store	56abec4d-c8c4-4c01-8708-596a4ebefd29	It was extremely frustrating when I opened it and found out that in the end it says that he sent the approval request to my supervisor, but I never received the request.	مجاهد علي	##########			2	ar	us		2	ar	extremely frustrate open find end say send approval request supervisor never receive request	Negative	1	1	0
Google Play Store	86d7ef4a-cda8-4375-83ca-c198dd191311	Very bad, very irritating, so much noise 😤	Aziz Hassan	##########			0	ar	us		1	ar	bad irritate much noise	Negative	1	0	0
Google Play Store	30986f80-dc5b-4dff-9567-116fa81387e6	Very bad	Zohair	##########			0	ar	us		1	ar	bad	Negative	1	0	0
Google Play Store	1f29384d-537d-4106-99a2-e4bbd740264c	It's unbelievable, every two days the application asks me to authenticate the device, and I haven't changed the device itself for three years. Please find a solution.	احمد	##########			1	ar	us		1	ar	unbelievable every two days application ask authenticate device havent change device three years please find solution	Negative	0	1	0
Google Play Store	48196182-67db-40ac-828e-9965a13b2a52	Unfortunately, I noticed the failure and cessation of all transfer and purchase operations suddenly and without stating the reasons!	محمد اليماني	2023-08-05 08:52:00			10	ar	us		1	ar	unfortunately notice failure cessation transfer purchase operations suddenly without state reason	Negative	0	1	0
Google Play Store	cbc058a2-b265-41ae-94b6-0d260d19f243	The worst application experience, slow, crashes and kicks you out of the program. Applications made by beginner programmers have higher quality and are better. It does not live up to be a bank application.	Abdulaziz matar	##########			15	ar	us		1	ar	bad application experience slow crash kick program applications make beginner programmers high quality good live bank application	Negative	1	1	1
Google Play Store	391130e3-f27b-4735-b631-f20417032415	The application has become worse and the supervisors of the application are nowhere to be found. They don't read what is written and no one praises the application. I don't know why they ignore our words. There should be a way to communicate our voices to them.	فهد الفهد	##########			1	ar	us		1	ar	application become bad supervisors application nowhere find dont read write one praise application dont know ignore word way communicate voice	Negative	1	0	0
Google Play Store	f2210d76-bb79-4422-b6a2-a9a6a314d614	The application "bad" is not allowing me to log in, even though I enter the correct information. Please fix it.	ابو إسحاق المرشدي	##########			9	ar	us		1	ar	application bad allow log even though enter correct information please fix	Negative	1	1	0
Google Play Store	f8606f10-1ff9-4a81-ad44-4b8328e0a2e5	Bad and failed application	Math Sdf	##########			0	ar	us		1	ar	bad fail application	Negative	1	1	0
Google Play Store	88773adf-8295-434e-8b55-48188f921ef6	It's a shame, by God, there is a failed country in it.	الحدث الأول	##########			0	ar	us		1	ar	shame god fail country	Negative	1	0	0
Google Play Store	45c3fcac-f8f1-45c7-888e-7c489c8995ac	Very bad, very slow login, sudden closure for no reason (login access expired!) Slow execution of the operation.	ahmad obaid	##########			25	ar	us		1	ar	bad slow login sudden closure reason login access expire slow execution operation	Negative	1	1	1
Google Play Store	7b97e0d2-9af4-49d1-bb21-353aa2e88562	The application is very bad, it keeps saying the service is unavailable and it kicks me out of the app. The app also freezes for a while and we have been facing this issue for a while. I request all customers of Bank Albilad to file a complaint through phone banking because complaining here will not solve the problem. I kindly ask everyone to cooperate.	Rs A	##########			6	ar	us		1	ar	application bad keep say service unavailable kick app app also freeze face issue request customers bank albilad file complaint phone bank complain solve problem kindly ask everyone cooperate	Negative	1	1	1
Google Play Store	97cd850a-e9bb-4daf-8c10-070321551561	An old application and an old design. Other banks have surpassed you by stages in application designs. Two points until the application is developed and catches up with the rest.	سلطان القحطاني	##########			4	ar	us		2	ar	old application old design bank surpass stag application design two point application develop catch rest	Neutral	1	0	0
Google Play Store	4712763f-3ce1-4c1c-b3ce-ff024cc1e604	After an experience that lasted for about a year, the result is as follows: the worst banking application I have used. It frequently logs you out of the system. In many banking operations, a window pops up saying "Sorry, the service is currently unavailable." It always gives you an error message that the internet is not available! I hope the application gets the necessary care, like other banks d…	ناصر	##########			41	ar	us		1	ar	experience last year result follow bad bank application use frequently log system many bank operations window pop say sorry service currently unavailable always give error message internet available hope application get necessary care like bank	Negative	1	1	0
Google Play Store	99647f8b-da16-4e0a-8b39-e141bd55557e	"The latest update on July 29, 2023 is not working at all. My device is My Book Pro F3."	Mr LoRd	##########			0	ar	us		1	ar	late update july work device book pro f	Negative	0	1	0
Google Play Store	0921b24e-b333-4542-a9d8-012aa51e0f2e	After the update, it started to freeze a lot.	Aserɣin	##########			0	ar	us		1	ar	update start freeze lot	Negative	0	0	1
Google Play Store	9291aa1f-d663-480f-882e-0ed8eed7e597	It has been a few months since it has been bad and it never works properly. Suddenly, it kicks you out of the application even if you try to enter it again and again. Unfortunately, it is a bad application and the worst part is that the bank doesn't update it or maintain it.	bandr dooore	##########			3	ar	us		1	ar	months since bad never work properly suddenly kick application even try enter unfortunately bad application bad part bank doesnt update maintain	Negative	1	1	0
Google Play Store	8c07bec7-97bc-45f5-b66f-d58e8d97613c	The application is not working.	Ssaleh alhaj	##########			1	ar	us		1	ar	application work	Negative	0	1	0
Google Play Store	84cab215-8dd6-47bf-b5cc-03a41e52c959	Very bad at clarifying transfer data, it is very necessary to be like Al Rajhi application that shows detailed data including the sender's name and receiver's name, and also displays a copy of the receipt to share with the other party. Due to the weakness of the country's application, I will transfer my salary to Al Rajhi Bank.	ابومنار العماري	##########			11	ar	us		1	ar	bad clarify transfer data necessary like al rajhi application show detail data include senders name receivers name also display copy receipt share party due weakness countrys application transfer salary al rajhi bank	Negative	1	1	0
Google Play Store	4d8e5061-ec7e-4a1a-b532-fab9775596ba	It has become very bad and has refused to switch to the Arabic language, after being one of the best banks.	Nn Bb	##########			0	ar	us		1	ar	become bad refuse switch arabic language one best bank	Negative	1	0	0
Google Play Store	51b0b24b-bb4b-443e-bd1d-6a8d9c2c9502	"Failed bank in international transfers, very high fees."	ابو عبدالعزيز	##########			0	ar	us		1	ar	fail bank international transfer high fee	Negative	1	1	0
Google Play Store	09d56e05-85e0-4a84-b381-5330c885e347	Lately, it has been bad, they have been kicking me out without any reason when trying to transfer or log in. A message appears saying that the login has expired.	Khaled Muhammed.	##########			15	ar	us		2	ar	lately bad kick without reason try transfer log message appear say login expire	Negative	1	1	0
Google Play Store	1652fae6-0756-42d8-a08e-f9aefed5b621	"An extremely brilliant application, and my rating is more than five stars."	كمال سليمان	##########			0	ar	us		5	ar	extremely brilliant application rat five star	Positive	0	0	0
Google Play Store	0b5e4cde-87b0-46cb-99e7-a2c9eca54d06	The application crashes and logs out suddenly, and if I make a transfer or a transaction, a message appears saying that this action cannot be performed at the moment, even though the transaction has already been executed. This has caused me to lose an amount that was transferred twice, and every time the application tells me that it is currently not possible. What is happening to you, Bank Al-Bil…	ابو أحمد Abo Ahmad	##########			11	ar	us		1	ar	application crash log suddenly make transfer transaction message appear say action perform moment even though transaction already execute cause lose amount transfer twice every time application tell currently possible happen bank albilad responsibility	Negative	0	1	0
Google Play Store	c60b9beb-5b55-4043-bf1d-4deb26e6e067	He refuses to register even though all the information is correct.	ابو حسين	##########			0	ar	us		1	ar	refuse register even though information correct	Negative	0	1	0
Google Play Store	94853dca-0bc1-4b36-b671-e0d4cd792208	The worst banking application in the kingdom, it never opens and always says that the service is unavailable.	Gehad Abou Elamayem	##########			0	ar	us		1	ar	bad bank application kingdom never open always say service unavailable	Negative	1	1	0
Google Play Store	e2dbf188-096e-4f39-94e5-891c433a86d4	Quick entry and fingerprint are not possible. 😡	Sameer Mustafa Gawad	##########			4	ar	us		1	ar	quick entry fingerprint possible	Negative	0	1	0
Google Play Store	fb188742-9735-4670-8e87-d75227470880	Oh wow! The most beautiful application with the best premium services, quality, high performance, and accuracy.	abn aljaili	##########			0	ar	us		5	ar	oh wow beautiful application best premium service quality high performance accuracy	Positive	0	0	0
Google Play Store	99bb9f11-acfd-474f-bd8e-076a4579ef05	The application cannot respond to entering the full username.. I deleted it and downloaded it again, but it was not useful. It may not be compatible with the current device.. Allah knows best.	سالم الزهراني	##########			8	ar	us		1	ar	application respond enter full username delete download useful may compatible current device allah know best	Negative	0	1	0
Google Play Store	092c8875-9fd6-4d47-ae25-9e9dd6508570	The service isn't working properly and this issue has been going on for a while. I hope you can resolve it soon.	بدر الدوسري	##########			0	ar	us		1	ar	service isnt work properly issue go hope resolve soon	Negative	0	1	0
Google Play Store	d3f3de61-9ed3-4833-8d50-e0203b56181b	Unfortunately, it's the worst application. I have been trying to register for months, but it keeps rejecting and saying that the deadline has passed even though I have completed all the required information.	Rtga.F Aa	##########			4	ar	us		1	ar	unfortunately bad application try register months keep reject say deadline pass even though complete require information	Negative	1	1	0
Google Play Store	5ab12778-4c0a-4ee5-8418-3fec58407e97	Very good.	UMER ALBHERYI	##########			0	ar	us		5	ar	good	Positive	0	0	0
Google Play Store	b91c06eb-c97a-446b-ade3-15aa1f567950	Good	محمد الشيباني	##########			0	ar	us		5	ar	good	Positive	0	0	0
Google Play Store	23001ac7-77da-488b-9e5c-d0059ecde1a7	It doesn't work. It tells me that the mobile number is incorrect when trying to open an account.	OReo TV	##########			0	ar	us		1	ar	doesnt work tell mobile number incorrect try open account	Negative	0	1	0
Google Play Store	bda4441f-6e0f-4ba0-bc4b-df013a82a3e3	A very, very bad application that when used, makes you feel like we are in 1999 compared to other advanced banking applications.	Abdullah Yahya	2023-07-05 00:45:00			14	ar	us		1	ar	bad application use make feel like compare advance bank applications	Negative	1	0	0
Google Play Store	45d31eed-05b9-4e8c-a9ce-9248e77090a6	"Dumb application and whoever built it is also dumb. We are in Saudi Arabia and the country's application is still bad. Look at Al Rajhi Bank and Al Inma Bank applications, see the programmers holding the money, and the victim is the customer. Evolve and stop fooling around!"	Alghuraybi Alghuraybi	2023-07-04 05:06:00			0	ar	us		1	ar	dumb application whoever build also dumb saudi arabia countrys application still bad look al rajhi bank al inma bank applications see programmers hold money victim customer evolve stop fool around	Negative	1	0	0
Google Play Store	edfa5d4a-030e-4b2c-ba76-7b83abe893e2	Bad application and new account registration page not working.	ابوعبدالله الصعيقري	2023-07-04 01:33:00			0	ar	us		1	ar	bad application new account registration page work	Negative	1	1	0
Google Play Store	e4e4d636-3b20-47c8-b76f-d1c5e074a519	Distinctive and easy-to-use application	A g	##########			2	ar	us		5	ar	distinctive easytouse application	Positive	0	0	0
Google Play Store	5e9ba974-c6e8-48cb-8cb0-416668f3bd2e	Bad application and it pops up several times for no reason.	abdullah alotaibe	##########			5	ar	us		1	ar	bad application pop several time reason	Negative	1	1	0
Google Play Store	2f0b266e-30ac-4932-b8b5-f70964a8668b	excellent	Mohammad Rayani	##########			0	ar	us		1	ar	excellent	Positive	0	0	0
Google Play Store	00472cb9-ec01-4a85-915b-9962050fcdab	Your location is secret. The service is not available now. The application's slogan for today is "from bad to worse". We cannot access the account and I'm currently outside the kingdom. I don't expect any improvement in this application. I blame not the bank, but myself for expecting an improvement in your performance. I have heard "if you call, they will respond", but there is no life for those …	محمد .5431	##########			76	ar	us		1	ar	location secret service available applications slogan today bad bad access account im currently outside kingdom dont expect improvement application blame bank expect improvement performance hear call respond life call	Negative	1	0	0
Google Play Store	3bb68337-9339-4198-8b1a-ffbe5d72fc5c	The worst customer service at the banks, you cannot update your data online or through the self-service machine, even at the branch, it is slow and takes a long time for updates to be made, and you have to go back to the branch again.	أبو هاجر الشرقاوي	2023-07-02 09:52:00			22	ar	us		1	ar	bad customer service bank update data online selfservice machine even branch slow take long time update make go back branch	Negative	1	0	1
Google Play Store	e5c87d25-f983-464c-bef0-cbd00ac80361	"The country for the people of the country is a slogan that encompasses everything; providing excellent service in all its branches, except for Al-Imam Bank Al-Bilad."	مستخدم Google	##########			0	ar	us		5	ar	country people country slogan encompass everything provide excellent service branch except alimam bank albilad	Positive	1	0	0
Google Play Store	548e3c74-6504-4344-bdfc-49e7dfe1dcd2	It is strange that the application is not working outside Saudi Arabia, like the Al Rajhi Bank application.	عبدالله الكبير	##########			3	ar	us		1	ar	strange application work outside saudi arabia like al rajhi bank application	Negative	1	1	0
Google Play Store	47da146f-f4ca-4d3a-9259-a3673aee6056	The application does not work outside of Saudi Arabia. Please solve the problem.	وليد حماده	##########			5	ar	us		1	ar	application work outside saudi arabia please solve problem	Negative	0	1	0
Google Play Store	a7fa28b9-214f-4b88-bccb-53647d5d2eae	If there is any trustworthy designer among you who knows how to design an application, please assist me. I don't understand how to create an application and the bank I work for does not have a budget for it.	ABDULMAJEED	##########			6	ar	us		1	ar	trustworthy designer among know design application please assist dont understand create application bank work budget	Negative	1	0	0
Google Play Store	afb05744-108b-40db-a7a1-94ee5ce1566e	One of the worst banking applications after the latest update, it freezes and gives you an incorrect password and then freezes again.	جناح الليل	##########			6	ar	us		1	ar	one bad bank applications late update freeze give incorrect password freeze	Negative	1	0	1
Google Play Store	3a23ab02-d30d-4c13-b408-4fb9bb72685d	The application is very bad after the update.	محمد ابن قويني	##########			0	ar	us		1	ar	application bad update	Negative	1	0	0
Google Play Store	df89e9af-eb87-4728-8384-3e548a1fea9b	Stupid application	Abunawaf	##########			0	ar	us		1	ar	stupid application	Negative	1	0	0
Google Play Store	c3bda9ce-bc12-4bb4-b69c-c37d6dee9cf1	Bad in everything, you can't add a new beneficiary for a transfer.	ابراهيم العبدلي	##########			0	ar	us		1	ar	bad everything cant add new beneficiary transfer	Negative	1	1	0
Google Play Store	843c4a8f-3f9f-4444-9fd8-bafd5af8feb3	The application is requesting device authentication, but the authentication is not successful and the response is that the service is currently unavailable. Please solve the problem.	ااهAhmed Mohmed	##########			0	ar	us		1	ar	application request device authentication authentication successful response service currently unavailable please solve problem	Negative	0	1	0
Google Play Store	6fca5f99-6a51-4782-9466-de5f35cc1be0	Very, very, very bad. I'm trying to log in but it's not working, and it keeps disconnecting every time I enter my information and it doesn't accept it.	محمد زيد	##########			12	ar	us		1	ar	bad im try log work keep disconnect every time enter information doesnt accept	Negative	1	1	0
Google Play Store	a9ad10d5-a76b-4503-81b7-102058915d50	The device authentication service is not available.	Shehab 2021	##########			0	ar	us		1	ar	device authentication service available	Negative	0	1	0
Google Play Store	10c76a63-a97d-4c0f-8059-37089804f1d1	Excellent	عماد صقر	##########			0	ar	us		5	ar	excellent	Positive	0	0	0
Google Play Store	a34e8b8b-223a-47f1-8b0d-f8157599a1c4	Unable to log in.	محمد سبع	##########			0	ar	us		2	ar	unable log	Negative	0	1	0
Google Play Store	22f6ddc8-14d8-42a1-871f-0bc754449a97	The application does not work outside of Saudi Arabia. The elements of the page overlap each other, making it difficult to view its content and fill in its fields.	Mohammad Yamani ابوزياد	##########			27	ar	us		2	ar	application work outside saudi arabia elements page overlap make difficult view content fill field	Negative	1	1	0
Google Play Store	b333f896-12cc-4344-b04c-7f4adfddf1bd	The best bank	hatem alqadi	##########			0	ar	us		5	ar	best bank	Positive	0	0	0
Google Play Store	48d4efef-c6ba-4d62-acb6-7c971e78b1a2	One of the best financial applications, thank you Bank Al-Bilad. The application has not been working since 21/6. I have deleted it and downloaded it several times without any benefit.	محمد الشهري	##########			3	ar	us		5	ar	one best financial applications thank bank albilad application work since delete download several time without benefit	Negative	0	1	0
Google Play Store	c62d75a6-4682-4e73-a2da-e21ad0fd1453	From then on, he became miserable and his mood got so bad.	اححمد الشمري	##########			0	ar	us		1	ar	become miserable mood get bad	Negative	1	0	0
Google Play Store	b7c8345e-794f-4bf1-a6c6-f0c74d489805	The application is not responding at all.	Said Fhmee	##########			0	ar	us		1	ar	application respond	Negative	0	1	0
Google Play Store	d20573c2-c62f-4d76-a3fa-179a4ce08fe2	After the update, it started to hang during transfers.	محمد عطيف	##########			0	ar	us		1	ar	update start hang transfer	Neutral	0	1	1
Google Play Store	85119ffd-73f3-4c14-9538-5cd335038e66	Needs a lot of improvements	AL ISMAIL	##########			0	ar	us		2	ar	need lot improvements	Neutral	1	0	0
Google Play Store	7b5d7edf-485c-4cad-adca-e4420bcc0af8	Unfortunately, the application has gone from bad to worse in every aspect.	Jaffal Aljaffal	##########			0	ar	us		1	ar	unfortunately application go bad bad every aspect	Negative	1	0	0
Google Play Store	5afbbba2-02fe-48f2-acc6-b8b169fdb6ae	Excellent	Sana Azza	##########			0	ar	us		5	ar	excellent	Positive	0	0	0
Google Play Store	42e63abb-4318-4884-a8e5-79f3f405a4c6	The worst application, every time it asks for device verification, and if you verify, the service becomes unavailable.	محمد العتيبي	##########			6	ar	us		1	ar	bad application every time ask device verification verify service become unavailable	Negative	1	1	0
Google Play Store	c672786f-2e46-4f95-84c6-429af7987491	The application is not working very, very bad. Please update the application.	Mali Eldali	##########			13	ar	us		1	ar	application work bad please update application	Negative	1	1	0
Google Play Store	cb6eec9c-d545-4817-9a1c-406c03d2b0c5	The application is not working.	Abo Ahmed	##########			8	ar	us		4	ar	application work	Negative	0	1	0
Google Play Store	344a60c9-8884-4009-b018-9b5114938eef	The worst bank application according to Joli Chic.	خالد يلداش	##########			0	ar	us		1	ar	bad bank application accord joli chic	Negative	1	0	0
Google Play Store	a02872bd-427d-4b6d-a51d-a51ea0ef4599	The application hasn't been opening for a while.	Tamer Badawi	##########			0	ar	us		1	ar	application hasnt open	Neutral	0	1	0
Google Play Store	c04ba7e3-ad12-494f-aeef-4e4719a91b64	It does not work.	Abadi Adil	##########			0	ar	us		1	ar	work	Negative	0	1	0
Google Play Store	e6f3bdad-b734-417d-bddc-891c795c9921	The application is not working and gives an error.	Abotalal Salh	##########			0	ar	us		1	ar	application work give error	Negative	0	1	0
Google Play Store	ce8b706a-96eb-4062-af9b-10a9e6eff42e	A wonderful application	hmad a	##########			0	ar	us		5	ar	wonderful application	Positive	0	0	0
Google Play Store	81fdf104-a498-4512-9acc-a4d40074cc38	"Worst service, worst application, and worst bank without competition."	Abdo Kordy	##########			2	ar	us		1	ar	bad service bad application bad bank without competition	Negative	1	0	0
Google Play Store	554015ce-40bb-4900-a462-7a9bd3bbd033	Beautiful	Khaled Al Dossari	##########			0	ar	us		5	ar	beautiful	Positive	0	0	0
Google Play Store	dc87bcbf-903b-437c-b381-898c9b54eb2f	The application is very bad, I delete it multiple times and reinstall it just so it can open, and then I trust the device again every time I download it and start using it. I wish the problem could be resolved.	ksa 6665	##########			20	ar	us		1	ar	application bad delete multiple time reinstall open trust device every time download start use wish problem could resolve	Negative	1	1	0
Google Play Store	6fedeeae-8ef6-4f52-960b-631ed9aaf60f	I haven't been able to open the application outside of Saudi Arabia for 3 months. I used to transfer money through the website, but now when I choose to transfer, the page appears blank without any text.	Huda Saleh	##########			6	ar	us		1	ar	havent able open application outside saudi arabia months use transfer money website choose transfer page appear blank without text	Negative	0	1	0
Google Play Store	a86cf00f-b894-4351-a7e5-beac11a6e596	Very bad	خالد الغامدي	##########			0	ar	us		1	ar	bad	Negative	1	0	0
Google Play Store	fd3f23bc-a6fb-42e6-aed6-419c7d617d1d	Weak after the latest update.	Khalied Noor	##########			0	ar	us		1	ar	weak late update	Negative	1	0	0
Google Play Store	dbd88ccb-dad5-477c-818b-f9aa29a4cf60	The application does not work outside the kingdom.	Nasser Alnasser	##########			0	ar	us		1	ar	application work outside kingdom	Neutral	0	1	0
Google Play Store	66db81f0-a1c1-41de-b68b-e5f13eabd0c9	Worst application	Ali Kaoud	##########			0	ar	us		1	ar	bad application	Negative	1	0	0
Google Play Store	e4ae1279-e057-4166-b98f-62447347c8ad	The application is not responding, and I can't send transfers from it, especially after the latest update of the application on June 15, 2023.	Gamal Elkadey	##########			41	ar	us		1	ar	application respond cant send transfer especially late update application june	Negative	0	1	0
Google Play Store	254fc631-236d-4715-bc56-6081228eeb2b	The application has been freezing for a while, and now it is requesting authentication from the same device every time I log in.	فيصل Rw1	##########			0	ar	us		1	ar	application freeze request authentication device every time log	Negative	0	0	1
Google Play Store	56657ebd-1980-43fd-bfed-33669317603a	The application, even after the latest update, gives a message of "service unavailable, please try again later".	maarafa maarafa	##########			32	ar	us		1	ar	application even late update give message service unavailable please try late	Negative	0	1	0
Google Play Store	89ef36fe-0d2a-4979-b5d8-a30bd4d15f78	Not compatible with the automatic fill feature from Samsung and Google for the username and password when using fingerprint.	mjK 94	##########			0	ar	us		4	ar	compatible automatic fill feature samsung google username password use fingerprint	Negative	0	1	0
Google Play Store	7551fe19-9b67-4645-9cc3-0c5fa56ce7c8	I've been trying to login for three days, but I can't login. It works when I use the Google browser, but not the application. I don't know what the problem is.	ibrahim yahya	##########			2	ar	us		1	ar	ive try login three days cant login work use google browser application dont know problem	Negative	0	1	0
Google Play Store	77ef70f1-0d96-4606-bac1-b7ac1efefb79	A beautiful application but there are frequent crashes that suddenly exit the app and cause big delays. It needs updates to fix these errors, and these updates have been delayed for a long time. I am surprised at the app's administrators. Subhan Allah (Glory be to Allah) and praise be to Him. Glory be to Allah the Great.	Abdullah 4Fun	##########			0	ar	us		3	ar	beautiful application frequent crash suddenly exit app cause big delay need update fix errors update delay long time surprise apps administrators subhan allah glory allah praise glory allah great	Negative	1	1	1
Google Play Store	44639d98-4ce3-4d49-8a7f-851d84dd015c	I cannot log in to Al-Saree'. There is also a problem with recognizing the local bank from the IBAN. I wanted to transfer to Al-Ahli Bank in Saudi Arabia, but when I enter the IBAN, it shows an error. I hope you can look into the programs of Alinma and Al Rajhi and develop your program like them. There is also a problem that I cannot access the transaction receipts and print or share them as PDF.…	ريما الجندي	##########			0	ar	us		2	ar	log alsaree also problem recognize local bank iban want transfer alahli bank saudi arabia enter iban show error hope look program alinma al rajhi develop program like also problem access transaction receipt print share pdf update account statement show first four five transactions	Negative	0	1	0
Google Play Store	29f84ea8-ac56-49c1-8fb3-36dd84dae31b	I wish if one of the officials in Bank AlBilad would download the application and give me their opinion. Whether they are satisfied or not, the application is very, very, very, very, very, very, very, very, very, very, very, very, very bad.	big Sameer	##########			2	ar	us		1	ar	wish one officials bank albilad would download application give opinion whether satisfy application bad	Negative	1	1	0
Google Play Store	e3f9a8dd-7d2f-4cf7-ad54-06a4ff5e8a4f	I cannot pay the traffic violations as the service screen currently displays "unavailable".	مصعب Mussab	##########			1	ar	us		5	ar	pay traffic violations service screen currently display unavailable	Negative	0	1	0
Google Play Store	7230f489-2de8-4f39-ae80-9fab0b040b5b	Very much	عمار اليمني	##########			0	ar	us		1	ar	much	Neutral	1	0	0
Google Play Store	62adea4f-5edd-4b87-b5dc-a9a155449d15	"Complicated application, I don't know why it's getting so complicated. They are insisting on a password, I just want to put a password that suits me."	محمد عبده	2023-06-09 03:52:00			0	ar	us		1	ar	complicate application dont know get complicate insist password want put password suit	Negative	1	0	0
Google Play Store	043b2706-e4c6-441f-934b-3ea78d47b594	The application is bad.	M Moilef	##########			0	ar	us		3	ar	application bad	Negative	1	0	0
Google Play Store	f91f2ddd-5fde-4d7d-bcd9-0abfa66780b0	The application is very bad and doesn't serve you online.	Moro Mody	##########			0	ar	us		1	ar	application bad doesnt serve online	Negative	1	1	0
Google Play Store	de1eb3d1-fbfd-463e-8633-6869c725f097	The application has not been working on Android since the last update. Find a solution for us, and if you can't protect our bank accounts, close them.	فيصل العيد	##########			0	ar	us		1	ar	application work android since last update find solution us cant protect bank account close	Negative	0	1	0
Google Play Store	02d174bb-81c7-482c-b37b-4ed8f5ea651f	A bad application that worsened the bank experience.	Nai Nai	##########			0	ar	us		1	ar	bad application worsen bank experience	Negative	1	0	0
Google Play Store	c2813d93-2655-47c1-a09b-d0c08a0ac09d	One of the easiest banks.	ناطق عبدالرحمن العبداني البعداني	##########			0	ar	us		5	ar	one easy bank	Positive	0	0	0
Google Play Store	62f8a262-3d13-4a03-a85a-89c553763b6d	Bad program, strange bank, and with this, messages don't get delivered. Call, and there is no response all day if it's good so that you can enter, this shows that the entire bank is weak.	عبدالقادر	##########			0	ar	us		1	ar	bad program strange bank message dont get deliver call response day good enter show entire bank weak	Negative	1	0	0
Google Play Store	9f5f7c3d-d41d-455a-bea9-75a98c7234b1	The best absolutely	Aymangobara Gobar	2023-06-05 06:52:00			0	ar	us		5	ar	best absolutely	Positive	0	0	0
Google Play Store	7036b28a-63c0-4a5a-8ac7-6f44689a16ad	The updated application does not work. It doesn't complete the final step and is unable to enter the application. It is a failure.	AHMED MAHER	##########			0	ar	us		1	ar	update application work doesnt complete final step unable enter application failure	Negative	0	1	0
Google Play Store	f0acc875-930a-4016-b57e-7273a324ade9	The application includes comments and does not support the features found in other banking applications.	a A	##########			0	ar	us		1	ar	application include comment support feature find bank applications	Negative	0	1	0
Google Play Store	8a6f61db-249a-4236-9fa8-83774e9c2c90	The worst application that I couldn't log in quickly and I couldn't access. The problem is that my money has disappeared and I don't know where it went??????!!!!!!	موضي محمد	2023-06-01 09:12:00			10	ar	us		1	ar	bad application couldnt log quickly couldnt access problem money disappear dont know go	Negative	1	1	0
Google Play Store	44bff309-333b-4e9b-8562-37d4c23c59e7	Very bad, I do not recommend it.	ابويوسف	##########			0	ar	us		1	ar	bad recommend	Negative	1	0	0
Google Play Store	fe31e2bb-7049-4408-b23d-03c21e3763a2	Unfortunately, it is slow, exhausting, and constantly crashes. It refuses to transfer between my personal accounts except every 10 minutes! In conclusion, it makes you consider canceling your account with the bank. (The app has become a necessity, so you need to know that you can lose customers because of your irritating app!) Follow the example of Al Rajhi Bank and Alinma Bank.	مسلم	##########			2	ar	us		1	ar	unfortunately slow exhaust constantly crash refuse transfer personal account except every minutes conclusion make consider cancel account bank app become necessity need know lose customers irritate app follow example al rajhi bank alinma bank	Negative	1	1	1
Google Play Store	4de39b0f-11a7-461d-bae7-b7aee80a9d21	The worst banking application I have ever seen in my life.	ANCIENT ACCOUNT	##########			0	ar	us		1	ar	bad bank application ever see life	Negative	1	0	0
Google Play Store	5bcb3926-c337-4402-9e81-83cb90f825ea	A message appears stating that the service is not available for transfers, and I also cannot transfer between my personal accounts. I have to wait for 10 minutes between each transfer!?	M A	##########			2	ar	us		1	ar	message appear state service available transfer also transfer personal account wait minutes transfer	Negative	0	1	0
Google Play Store	e8a87596-7536-4e51-a570-aebec2a02006	Good	علي علوش	##########			0	ar	us		4	ar	good	Positive	0	0	0
Google Play Store	259066e5-958a-46dc-8724-82e87c9cd6a2	The application has a problem that interferes with my accounts and sometimes logs me out. Please solve this issue as soon as possible.	الجوكر	##########			0	ar	us		2	ar	application problem interfere account sometimes log please solve issue soon possible	Negative	0	1	0
Google Play Store	0f309267-0b59-472d-8988-96b02a8fa0e0	After the latest update on 22/5/2023, I cannot switch between my accounts... The app keeps logging out at the last step.	Emad Said	##########			35	ar	us		2	ar	late update switch account app keep log last step	Negative	0	1	0
Google Play Store	eacedbfd-8f84-4718-86e9-a6ac6a2f70bd	The application is worse than bad and it is not appropriate to be a bank application.	أبو البراء الحساب الاصلي	##########			0	ar	us		1	ar	application bad bad appropriate bank application	Negative	1	0	0
Google Play Store	8b33eedc-190f-44a0-85e1-bed32655eeff	The worst application and the worst bank in the Kingdom of Saudi Arabia. It is a primitive application that has no relation to electronic services. It doesn't even deserve a single star.	HUSHAM MAHMOUD	##########			0	ar	us		1	ar	bad application bad bank kingdom saudi arabia primitive application relation electronic service doesnt even deserve single star	Negative	1	0	0
Google Play Store	bb1cbe2f-eeb6-410c-803b-3b6de50f0303	Good	الهذلي fafa	##########			0	ar	us		5	ar	good	Positive	0	0	0
Google Play Store	7cd6a850-1118-4589-a50c-0b810f631855	It always crashes and logs me out of the application. This problem has been occurring for a long time and has not been resolved.	عمر العنزي	##########			0	ar	us		1	ar	always crash log application problem occur long time resolve	Negative	0	1	0
Google Play Store	6ada886a-cdfc-4ca6-953d-a4cb43996bb7	Very bad application. It is always freezing, and I do not recommend anyone to deal with this bank because this application has a bad interface.	Ibrahim Alaaraj	##########			0	ar	us		1	ar	bad application always freeze recommend anyone deal bank application bad interface	Negative	1	0	1
Google Play Store	2bbf4c22-0640-41dd-ba69-e468bf166b12	A failed bank that raises blood pressure, not even ten times entered through the computer. May God punish those who oppress people.	D-Hakim S	##########			0	ar	us		1	ar	fail bank raise blood pressure even ten time enter computer may god punish oppress people	Negative	1	1	0
Google Play Store	54c4fa30-027d-4130-b9ca-3d405f8de9e5	The worst application and the worst bank, they complicate things in a way you can't imagine, my brothers, look at other banks and see the progress and services, while you are stuck with this complicated old program. If you want a simple task, they complicate things for you and make you hate this bank.	عمران الحريري	##########			0	ar	us		1	ar	bad application bad bank complicate things way cant imagine brothers look bank see progress service stick complicate old program want simple task complicate things make hate bank	Negative	1	0	0
Google Play Store	b0204ee9-4cd7-45c8-b02f-128e4226adf6	Beautiful	yaseen alsindhi	##########			0	ar	us		5	ar	beautiful	Positive	0	0	0
Google Play Store	fe087e31-13cc-494c-9f7b-6a6c3b444cfc	The bank is good and provides excellent service.	Mustafa Mohammed	##########			0	ar	us		5	ar	bank good provide excellent service	Positive	0	0	0
Google Play Store	38098b87-8244-4db3-96d9-ea2d0f40bcf9	"The worst application is one that cannot be accessed from both the iPhone and the Galaxy."	al hassan	##########			0	ar	us		1	ar	bad application one access iphone galaxy	Negative	1	0	0
Google Play Store	f28f04ce-941c-4d11-a4f5-fe5a99fba7ed	Excellent very much	GOLDEN BOY	##########			0	ar	us		5	ar	excellent much	Positive	0	0	0
Google Play Store	9483d48b-4da4-4a4b-b4a4-bf9b3db1f16f	Convenient service.	عبد الرحمن الفضلي القحطاني.	##########			0	ar	us		5	ar	convenient service	Positive	0	0	0
Google Play Store	6fcfa144-66e3-48f2-8afc-23e90e660f74	The application is not working, Bank AlBilad.	صدام عبده قاسم الفقيه َ َ	##########			0	ar	us		1	ar	application work bank albilad	Negative	0	1	0
Google Play Store	834b1422-f9e3-426d-a878-0d80a05f6dca	Why is Sudan not included in the International Beneficiary Addendum?	فيصل	##########			0	ar	us		1	ar	sudan include international beneficiary addendum	Neutral	0	1	0
Google Play Store	fd022152-fd96-4b11-a26a-f5cbe57d82e3	The application is not working. Please solve the problem as soon as possible to avoid disrupting the customers' affairs and causing harm to them!	RD _SA	##########			6	ar	us		1	ar	application work please solve problem soon possible avoid disrupt customers affairs cause harm	Negative	0	1	0
Google Play Store	4691dcd8-fd42-470a-995d-fd5cfb02b70c	There is a problem in the latest update. Please solve it as soon as possible. The application is not performing any action to the end, but the application icon keeps spinning indefinitely.	شوعي غلفان	##########			0	ar	us		1	ar	problem late update please solve soon possible application perform action end application icon keep spin indefinitely	Negative	0	0	1
Google Play Store	efb91d9b-f84e-4b54-b717-b8535611f97d	Excellently	ناصر القحطاني	##########			0	ar	us		5	ar	excellently	Positive	0	0	0
Google Play Store	e6880201-4cfd-40e7-9d9f-b93542b80c84	Brothers in Bank AlBilad, I ask you in the name of Allah, is this a bank application in the Kingdom of Saudi Arabia? I swear to Allah, I don't trust you even in bill payments, let alone bigger things. I swear by Allah, I will not remain in this bank as long as it continues like this. A mobile recharge deduction was made from my balance, and the bank doesn't know where it went or reached the benef…	كل الوقت	##########			0	ar	us		1	ar	brothers bank albilad ask name allah bank application kingdom saudi arabia swear allah dont trust even bill payments let alone big things swear allah remain bank long continue like mobile recharge deduction make balance bank doesnt know go reach beneficiary every response get maybe suddenly find indebted sum riyals party acknowledge amount bank albilad insist pay peace upon kind injustice people …	Negative	1	1	0
Google Play Store	db016c69-f7c6-40a7-9459-d6cbe7b77676	Beautiful	Khaild Faleh	##########			0	ar	us		5	ar	beautiful	Positive	0	0	0
Google Play Store	e0b0c7d5-13d1-48b3-8fb5-1d0f2248bd75	Very excellent, but there is a problem which is the delay in sending the temporary passport, as the time is ending and the temporary number has not been sent yet to open the application.	عابر سبيل	##########			2	ar	us		5	ar	excellent problem delay send temporary passport time end temporary number send yet open application	Negative	1	0	1
Google Play Store	3d76c5f4-5fb7-4023-8975-e15e34a2d5d1	The bad application is disappointing. I am a new customer and I did not like it at all.	‪Osama Al Rashid (Αl-ĸiиɢ)‬‏	##########			0	ar	us		1	ar	bad application disappoint new customer like	Negative	1	0	0
Google Play Store	81173552-37fd-400c-b704-12afe4c90d10	The worst banking application I have ever dealt with. It takes forever to log in, sometimes it tells me to check my internet connection even though it is working fine. And every time, it's the same issue. They need to fix it ASAP, it's very frustrating.	Smara Baz	##########			0	ar	us		1	ar	bad bank application ever deal take forever log sometimes tell check internet connection even though work fine every time issue need fix asap frustrate	Negative	1	1	1
Google Play Store	7457bf6d-5c62-4499-beb5-2cfaddd6642b	There is no option to update identification information through the application like other banks. It is necessary to visit one of the branches and wait, which is quite strange.	A.H.A	##########			0	ar	us		2	ar	option update identification information application like bank necessary visit one branch wait quite strange	Negative	1	0	0
Google Play Store	19e9bf8f-9479-4e97-b502-ded354cfcecd	The application is terrible and it keeps freezing for hours even though it used to be better than that.	mohd AL roff	##########			1	ar	us		1	ar	application terrible keep freeze hours even though use good	Negative	1	0	1
Google Play Store	a9c87f81-0952-4e24-a925-16fbc16c6a07	One of the worst banking applications.	الضاحية العقاريه	2023-05-04 06:49:00			0	ar	us		1	ar	one bad bank applications	Negative	1	0	0
Google Play Store	bcddb168-e5cd-4027-9d22-fd7550d1aa8b	The application is bad when I enter to create a password and username it does not want to write the password, and this happens more than 100 times, honestly the worst.	محمد عيد الله	2023-05-03 06:00:00			1	ar	us		1	ar	application bad enter create password username want write password happen time honestly bad	Negative	1	1	0
Google Play Store	df6c3ab0-6d80-46ce-92b6-9451e07c1c02	The application does not work outside the kingdom and always shows that it is without an internet connection.	Mohamed Kassab	2023-05-03 04:39:00			3	ar	us		1	ar	application work outside kingdom always show without internet connection	Negative	0	1	0
Google Play Store	1b96868f-c7db-4cf4-af62-32590d288f7a	The application is from bad to worse, unfortunately it does not support international transactions, and you receive a payment failure message.	ابــو بيســـان	2023-05-02 08:22:00			0	ar	us		1	ar	application bad bad unfortunately support international transactions receive payment failure message	Negative	1	1	0
Google Play Store	055ecabb-2955-4d2b-a2ed-32af4a85267a	He deserves a star.	BBC QM	2023-05-02 03:15:00			0	ar	us		1	ar	deserve star	Positive	1	0	0
Google Play Store	88aca43d-ad72-4680-8a29-595e410cdbb5	There is no quick login or fingerprint.	Abdo Bashir	2023-05-01 07:26:00			0	ar	us		2	ar	quick login fingerprint	Negative	0	1	0
Google Play Store	a0b95eef-b4ed-4060-9186-d23046324caf	In order to change the daily transfer limit, you need to visit the branch. What kind of backwardness is this in development? All banks should have online limit changes.	Kroom	2023-05-01 05:30:00			0	ar	us		1	ar	order change daily transfer limit need visit branch kind backwardness development bank online limit change	Negative	1	0	0
Google Play Store	7d53d13e-ce58-4dac-a585-be869323ed19	The bank "C" and the application are not working.	أبو محمد	2023-05-01 04:28:00			1	ar	us		1	ar	bank c application work	Negative	0	1	0
Google Play Store	20522a42-5367-4c67-b7a5-dd9b54cb0cc5	Excellent	Islam Sharabia	##########			0	ar	us		5	ar	excellent	Positive	0	0	0
Google Play Store	4f6bae08-099b-44e3-93e8-1e8161217408	Good.	صالح مغشي	##########			0	ar	us		4	ar	good	Positive	0	0	0
Google Play Store	579ca9ff-111f-4455-903c-858567130e18	The application is excellent	محمد احمد	##########			0	ar	us		5	ar	application excellent	Positive	0	0	0
Google Play Store	4fdd2b68-a0fe-4a70-a701-32ae49108ba3	There is a problem with the application, which is the deletion of the current account and the deletion of the investment account. I kindly request you to solve it as soon as possible.	قناة الدين المتنوعة	##########			0	ar	us		1	ar	problem application deletion current account deletion investment account kindly request solve soon possible	Negative	0	1	0
Google Play Store	d037773b-51ec-4edf-b497-832ca94caf7f	It bothers me when I log into the application and it tells me that the username is incorrect, even though I have entered the data multiple times.	عبداللطيف جميل الواقدي	##########			7	ar	us		1	ar	bother log application tell username incorrect even though enter data multiple time	Negative	0	0	0
Google Play Store	ed349a86-1cfb-4249-9f09-bb3ab2525170	All banks are currently undergoing continuous development based on customers' feedback and the country's needs. Your information is secure, and on top of that, if your transactions are disrupted, you may encounter issues when the application is suspended, especially during peak times.	fares. Zh	##########			1	ar	us		1	ar	bank currently undergo continuous development base customers feedback countrys need information secure top transactions disrupt may encounter issue application suspend especially peak time	Neutral	0	1	0
Google Play Store	788caa86-c099-444d-99cc-b1298a111db6	Unfortunately, the application does not open outside of Saudi Arabia. Please be cautious for anyone planning a vacation. We have contacted customer service, and their response was that the application is indeed not functioning in some countries.	Mohamed Abdallah	##########			8	ar	us		1	ar	unfortunately application open outside saudi arabia please cautious anyone plan vacation contact customer service response application indeed function countries	Negative	1	1	0
Google Play Store	874be2a3-f44e-41ed-95c3-0e4f1bda21e0	I have been facing problems with the application for two weeks. I hope to solve them. I have deleted it and downloaded it more than once, but the same problem persists.	خالد الزهراني	##########			0	ar	us		1	ar	face problems application two weeks hope solve delete download problem persist	Negative	0	1	0
Google Play Store	9b9ece14-1af8-49ea-8bda-770caec6d152	Best service	محمد عبده غالب	##########			0	ar	us		5	ar	best service	Positive	0	0	0
Google Play Store	d5098e98-a2a1-43a1-aba0-b99f451dde0e	The application is not working.	قناة تيجان 1	##########			0	ar	us		1	ar	application work	Negative	0	1	0
Google Play Store	c6207a99-59ef-4c46-aa0a-d4fbca7d15cc	The problem is that the application cannot be opened from outside the kingdom.	Hamed Elnady	##########			0	ar	us		1	ar	problem application open outside kingdom	Negative	1	1	0
Google Play Store	bf787012-4c4c-4b55-9e30-d6f1daea6ffc	It doesn't even deserve one star. the worst application, a failed bank, and there is no benefit from it except wasting time. I will go to the branch and close my account. I don't want to deal with this bank ever again.	محمد فايز	##########			0	ar	us		1	ar	doesnt even deserve one star bad application fail bank benefit except waste time go branch close account dont want deal bank ever	Negative	1	1	0
Google Play Store	57d5f0d3-d262-42ac-9054-315e0726033b	The program is very excellent and I highly recommend it, and the bank is very service-oriented with the staff being very cooperative.	Mohammed Al Ramadi	##########			0	ar	us		5	ar	program excellent highly recommend bank serviceoriented staff cooperative	Positive	1	0	0
Google Play Store	ff0c91c9-9a08-4fca-927c-024b02dc9c61	The application is not working and I am outside of the kingdom. Other bank applications are much better.	Hazem Samir	##########			1	ar	us		1	ar	application work outside kingdom bank applications much good	Negative	1	1	0
Google Play Store	05c3c404-5b87-4cbd-a626-14e8811feadd	The application is very bad and it does not respond or open.	Wael Jowad	##########			2	ar	us		1	ar	application bad respond open	Negative	1	1	0
Google Play Store	1a2b7b68-f953-40b2-98a0-ff97eda801f1	Bad bank and nightmare.	Ebra Qahtani	##########			0	ar	us		1	ar	bad bank nightmare	Negative	1	0	0
Google Play Store	ccfa4a59-09ad-4b41-85b7-55437bbede10	Why is the transfer to Al-Rajhi in riyals and 15 halalas? I feel it's expensive. 🥲	IEKJ KJ	##########			0	ar	us		5	ar	transfer alrajhi riyals halalas feel expensive	Negative	1	0	0
Google Play Store	281ef4df-0071-4dfb-a4fc-a3caf4c25ec5	Problem with login	عقيل وليد عوض	##########			0	ar	us		1	ar	problem login	Negative	0	1	0
Google Play Store	182faa31-2ce2-41d0-8073-5d876630c792	There are many issues with the application. I hope the responsible individuals can find a solution.	Mr. mansour	##########			3	ar	us		2	ar	many issue application hope responsible individuals find solution	Negative	1	0	0
Google Play Store	c58359d2-9586-4493-8935-3760b82061d1	Excellent and easy.	زمـــوح تهامه	##########			0	ar	us		3	ar	excellent easy	Positive	0	0	0
Google Play Store	f9b6ed9c-6e3a-435f-962a-6f25f44035b9	The application has many problems. It crashes suddenly without any reason and it is very slow. It is always offline, which makes any financial transaction exhausting and every time there is an update, I wait for improvement but there is no change. If there is another application for the bank in the country, I don't know about it. I hope to be informed as this service does not befit the name of th…	Ahmad mohammad	##########			3	ar	us		1	ar	application many problems crash suddenly without reason slow always offline make financial transaction exhaust every time update wait improvement change another application bank country dont know hope inform service befit name bank	Negative	0	1	1
Google Play Store	cad23a8c-411a-432e-94f6-1932587827fa	The application is not working.	mahmoud nassar	##########			0	ar	us		1	ar	application work	Negative	0	1	0
Google Play Store	132f9871-f66d-4ad4-a299-68c8e897d5e0	The application is not opening for me, I have tried various methods but it refuses... What is the solution? I can't convert, pay, or do anything.	ام عبدالرحمن الحبشي	##########			3	ar	us		1	ar	application open try various methods refuse solution cant convert pay anything	Negative	0	1	0
Google Play Store	edfe0795-cd7d-4189-880e-adc47aa7af60	I'm not skilled in using applications, but this application is really easy and I haven't encountered any difficulty with it. Thank God. Well done!	Amori Rak	##########			1	ar	us		5	ar	im skilled use applications application really easy havent encounter difficulty thank god well do	Positive	1	0	0
Google Play Store	8d849841-ad6c-4eb7-9d64-22404f8567a0	Complex	م.سالم المطرفي	##########			0	ar	us		1	ar	complex	Neutral	1	0	0
Google Play Store	0bfea25c-7eca-4aa9-ad61-77e672a826f3	The application does not compare to a banking application. The best banking application is Al Rajhi Bank.	سليمان العبدالله	##########			0	ar	us		1	ar	application compare bank application best bank application al rajhi bank	Positive	0	0	0
Google Play Store	a9b5fbb9-eb99-4b87-90d4-ae574837398a	I receive a message saying "No internet connection" even though the internet is connected.	أبو هاشم	##########			0	ar	us		1	ar	receive message say internet connection even though internet connect	Negative	0	1	0
Google Play Store	9b02847b-2ed2-40ad-b18c-f18aeb887716	"The bank is terrible, everything requires you to visit one of the bank branches to freeze my account for updating information. The application also refuses to update, I don't know what's the use of online banking, it's living in the 90s."	aobid Alwafi	##########			0	ar	us		1	ar	bank terrible everything require visit one bank branch freeze account update information application also refuse update dont know whats use online bank live	Negative	0	1	1
Google Play Store	355e647d-5b90-4c9d-9164-3304da6744ba	All the comments are negative, oh bank administrators, where are you?? There is a problem with the application: "Please check your internet connection." Please try again!	يوسف علي	##########			0	ar	us		1	ar	comment negative oh bank administrators problem application please check internet connection please try	Negative	1	1	0
Google Play Store	3e664e15-28aa-4a4c-9294-4da81867878f	Good	ناصر المنيعي	2023-04-09 02:00:00			0	ar	us		3	ar	good	Positive	0	0	0
Google Play Store	2f51a062-d78a-46af-a06c-684cfaa55530	Excellent	جلال بورتبيل	##########			0	ar	us		1	ar	excellent	Positive	0	0	0
Google Play Store	3bef915b-9347-4997-a1db-da970f4f6ac5	Still alive	Hanane Chehili	##########			0	ar	us		1	ar	still alive	Neutral	0	0	0
Google Play Store	e97ff6ca-d07c-4bb8-b82d-25f026e35467	The application has become very bad, it crashes a lot and sometimes doesn't even open due to its lack of internet connection despite having internet. Only one star for the review. 👎🏼	احمد شمراخ	2023-04-07 02:39:00			10	ar	us		1	ar	application become bad crash lot sometimes doesnt even open due lack internet connection despite internet one star review	Negative	1	1	1
Google Play Store	e0b5b352-450c-4595-b36e-1ee5233ae7e5	There is a problem with the delay in login to the application after the new update.	أبو جسار	2023-04-05 08:16:00			2	ar	us		2	ar	problem delay login application new update	Negative	0	0	1
Google Play Store	123d9c82-d591-492c-8d3a-ef7f784a4cfa	Thank you.	mohmmed2121 Ahemd	##########			0	ar	us		5	ar	thank	Positive	0	0	0
Google Play Store	c3deb4f0-9fd5-4524-ba76-d86362a955f1	After the update, the application became English.	عصام شهاب	##########			0	ar	us		1	ar	update application become english	Neutral	1	0	0
Google Play Store	e70b3615-9a66-44b4-956c-bf00b196829d	The bank is bad and very slow. Is it reasonable to wait 3 hours to get a bank statement?	MHMD GARIB	##########			0	ar	us		1	ar	bank bad slow reasonable wait hours get bank statement	Negative	1	0	1
Google Play Store	56835b8c-e687-416b-b4df-7a3642043c1f	A failed registration application, even worse than a failure.	MrMo Mo	2023-04-03 04:36:00			0	ar	us		1	ar	fail registration application even bad failure	Negative	1	1	0
Google Play Store	380ec686-5bc7-45db-b766-12c75895047c	It has become very bad.	البرغوت الحربي	##########			0	ar	us		1	ar	become bad	Negative	1	0	0
Google Play Store	14630943-c27e-41d2-ad6f-0d485f86bfb3	Distinctive application	‪ABUSAOUD “ABUSAOUD1991” ABUSAOUD‬‏	2023-04-02 01:01:00			0	ar	us		5	ar	distinctive application	Neutral	1	0	0
Google Play Store	d2da3c37-b559-4df5-8b3f-2e961cd667dc	I have read a lot about the application and I was honestly surprised. I have been using the application for a while and I couldn't find any flaws in it. It keeps getting renewed depending on the updates and internet speed. I really don't find any flaws in it. Thank you to the responsible people of Bank Al Bilad application for your tangible efforts in developing and improving the quality of deali…	خالد الجاسر مجموعة انسان	##########			2	ar	us		5	ar	read lot application honestly surprise use application couldnt find flaw keep get renew depend update internet speed really dont find flaw thank responsible people bank al bilad application tangible efforts develop improve quality deal application deserve star	Positive	1	1	0
Google Play Store	66eb7ea5-8fa6-4b84-bf87-55ff9bc773ac	An application that makes it easy for you, nice. 👍👌	فهد راجحي	##########			0	ar	us		5	ar	application make easy nice	Positive	0	0	0
Google Play Store	e475ee56-54c4-4568-b1d1-d7c2bcf6f408	The application locks and exits suddenly.	مساعد البخيت	##########			0	ar	us		4	ar	application lock exit suddenly	Neutral	0	1	0
Google Play Store	6bdb47ea-f9e5-4f33-a292-c1820eb9e170	Bad.	Mohammed Ali	##########			0	ar	us		1	ar	bad	Negative	1	0	0
Google Play Store	43ac54f9-f1c9-4416-bc3b-8ed0aed92b09	The application is very bad, it frequently freezes and its download is very slow.	Ayman Mohammed	##########			2	ar	us		1	ar	application bad frequently freeze download slow	Negative	1	0	1
Google Play Store	f6dd3f69-4837-4640-8c9a-696f39c21ae4	It is very bad, every time there is a mistake in the username and password, and if I try to call you for confirmation, it kicks me out of the application, and the same thing keeps happening. They deserve a negative star.	Badr Enezi	##########			1	ar	us		1	ar	bad every time mistake username password try call confirmation kick application thing keep happen deserve negative star	Negative	1	1	0
Google Play Store	2d89e046-820a-4f38-ba94-88c8a64061f2	مم can be translated to "Hmm" or "hmmmm". It is an expression of hesitation or thinking.	مبروك الرشيدي	##########			0	ar	us		5	ar	translate hmm hmmmm expression hesitation think	Neutral	1	0	1
Google Play Store	f9cceb5f-480e-4eb0-a399-1c9bc234c3b0	It does not work on a Samsung Galaxy 10.	vc dv	##########			0	ar	us		1	ar	work samsung galaxy	Neutral	0	1	0
Google Play Store	898562bc-e185-46a4-a584-122fcb4776bd	Good.	عبدالله علي عبدالسلام	##########			0	ar	us		5	ar	good	Positive	0	0	0
Google Play Store	f0caac95-5294-4558-80c2-0df6c0e85230	Very baddddddddd.	ياوافي الوقت	##########			0	ar	us		1	ar	baddddddddd	Negative	1	0	0
Google Play Store	983b2873-497c-4164-a8e5-b4157f3121c7	Very excellent	طارق اليامي	##########			0	ar	us		5	ar	excellent	Positive	0	0	0
Google Play Store	14838369-4aa7-4a23-8d7a-4d63442d898b	Absolutely wonderful	فواز قاسم صالح محمد قاسم	##########			0	ar	us		2	ar	absolutely wonderful	Positive	0	0	0
Google Play Store	f51e5823-21e4-4483-b284-f4e478b8f8eb	"Zabalh App and Azbal Bank"	Hani	##########			0	ar	us		1	ar	zabalh app azbal bank	Neutral	1	0	0
Google Play Store	622cd52e-9544-4932-8bbb-47d33e37e976	The worst banking application you can use, a failed and complicated application with no benefit except wasting time and filling the bank's void that they have an application.	The best	##########			45	ar	us		1	ar	bad bank application use fail complicate application benefit except waste time fill bank void application	Negative	1	1	0
Google Play Store	62ee465f-7b54-4cd1-99cd-e4c3325249f3	"Bad application despite the current competition among banks to provide the best to their customers. I have been using Al-Bilad app for two months now and I have not been able to access my account. There is difficulty in registration and the icons are unsuccessful. And when I contacted the bank for assistance, they say this is what is available. Unfortunately."	ابومشعل الشمري	##########			11	ar	us		1	ar	bad application despite current competition among bank provide best customers use albilad app two months able access account difficulty registration icons unsuccessful contact bank assistance say available unfortunately	Negative	1	1	0
Google Play Store	0ae74c09-301e-4cda-bde3-50b8ad796bee	I do not recommend the application, it has many malfunctions and no longer works outside the Kingdom.	Mohamed Sayed	##########			2	ar	us		1	ar	recommend application many malfunction long work outside kingdom	Negative	1	1	0
Google Play Store	5bcdfb42-fc95-4555-8ba1-07d624003f5e	I rely on God and He is the best guardian against every vile person who exploits the ignorance of people to take, seize, and plunder their wealth. May God not bless him, his house, his children, and his misguided provision.	şēcrēț	##########			0	ar	us		1	ar	rely god best guardian every vile person exploit ignorance people take seize plunder wealth may god bless house children misguide provision	Negative	1	0	0
Google Play Store	5595d510-3fd1-4d29-b5b5-23f967221389	My account cannot be opened on the application after several attempts.	eyad Ashry	##########			0	ar	us		1	ar	account open application several attempt	Negative	0	1	0
Google Play Store	c1d14ef0-41de-4717-8d35-be00fed147f7	There is a problem with the credit card application, when filling out the information, the application crashes.	Bat 009	##########			0	ar	us		2	ar	problem credit card application fill information application crash	Negative	0	1	0
Google Play Store	bd2955f1-c420-44d8-9e0e-28be96e7b125	The application is no longer working at all on Android devices, regardless of their type. Also, the browser is not working and you are out of the country. Please fix the problem.	Mohamed Sayed	##########			55	ar	us		1	ar	application long work android devices regardless type also browser work country please fix problem	Negative	0	1	0
Google Play Store	96589d12-2a01-4469-9cd1-e365125f6d8d	The app is not working and I am outside the country and I don't know how to send money to my friend. Please solve the problem quickly.	Abo Omar	##########			0	ar	us		1	ar	app work outside country dont know send money friend please solve problem quickly	Negative	0	1	0
Google Play Store	55a0b782-9ba4-42b2-9547-62e8543f3b6e	The latest update on 1/3/2023 has a problem where the names of the command icons on the application do not appear.	Srajali Ali	##########			0	ar	us		5	ar	late update problem name command icons application appear	Negative	0	1	0
Google Play Store	87c01fe9-2719-47c1-b82e-d073f9402daa	There is a problem with the application. Please solve it quickly. The problem is with the new online registration, where when you reach the title stage, options such as prince or sir do not appear. Please solve the problem quickly.	Badawi Abdel Fatah	##########			24	ar	us		2	ar	problem application please solve quickly problem new online registration reach title stage options prince sir appear please solve problem quickly	Negative	0	1	0
Google Play Store	7f1fc7a8-ef8e-491f-865e-13d0c4ac6393	Glory be to Allah and praise be to Him.	عبدالله ال عاطف	##########			0	ar	us		1	ar	glory allah praise	Positive	0	0	0
Google Play Store	98ca8a55-7aad-4436-a311-cb67f378767a	It needs improvement and follow-up from the bank management due to its frequent malfunctions... and because it assists fraudsters in hacking and theft... as it exits you from the middle of the process and leaves the application open.	S Albashah	##########			3	ar	us		1	ar	need improvement followup bank management due frequent malfunction assist fraudsters hack theft exit middle process leave application open	Negative	0	1	0
Google Play Store	12fd36ea-144e-4912-9785-fd98fe0e931d	Unfortunately, I am traveling outside the kingdom and I am disappointed because the application is not working. It is extremely embarrassing. If you are not responsible, I will close my account and withdraw my funds. This problem has been recurring and trust is now nonexistent.	ravar22 sva	##########			27	ar	us		1	ar	unfortunately travel outside kingdom disappoint application work extremely embarrass responsible close account withdraw fund problem recur trust nonexistent	Negative	1	0	0
Google Play Store	0d3c7f42-8ea1-42c6-8487-a0499983002f	I hope to change the interior design to match the level of other banking applications.	SAFAR ALMALKY	##########			0	ar	us		2	ar	hope change interior design match level bank applications	Neutral	1	0	0
Google Play Store	a40c75a5-dcea-4656-b56d-4c63aa2bca9b	Wonderful	يحيى محمد	##########			0	ar	us		5	ar	wonderful	Positive	0	0	0
Google Play Store	a72545a0-1d99-4a47-87ad-7c65df196ff4	What's wrong with the application, hopefully everything is fine.	fa6m_6m Al hawsawe	##########			0	ar	us		3	ar	whats wrong application hopefully everything fine	Negative	1	0	0
Google Play Store	2f31e88e-e3dd-4ed0-98bc-2c77a8f888b4	The program is not working. There is a problem with the application. It was working before and now it has stopped. What is the reason? Should we switch to another program or what should we do?	ابراهيم حسن	##########			0	ar	us		1	ar	program work problem application work stop reason switch another program	Negative	0	1	0
Google Play Store	92675284-93bd-4573-8fb8-3e3136173d1b	The program has stopped working and it says "Unable to connect to the internet."	Sami ALSAMI	2023-03-05 08:19:00			0	ar	us		1	ar	program stop work say unable connect internet	Negative	0	1	0
Google Play Store	1c85f9b7-b379-4cc0-a329-71660ff79166	I am tired of trying to log into my account, but it does not allow me to log in even though my information is correct.	Ali Alrofiey	2023-03-05 07:00:00			0	ar	us		1	ar	tire try log account allow log even though information correct	Negative	0	1	0
Google Play Store	40477700-130e-4ab3-9398-ac509e0152a2	To solve the problem for those who cannot open the application, uninstall the app. Download the app again. Log in with the old username and password, and it should work, God willing.	Sultan Bakri	2023-03-05 04:27:00			0	ar	us		2	ar	solve problem open application uninstall app download app log old username password work god will	Neutral	0	1	0
Google Play Store	4094d702-f220-444d-ba08-448431b8fc89	A single star is very bright.	Ahmed Amin	##########			0	ar	us		1	ar	single star bright	Positive	1	0	0
Google Play Store	21e51da9-6a4a-4a46-a5e4-229aa112fcec	Unfortunately, this application is a failure many times. It gives me "no internet connection" message frequently. And no bank does this... Check yourselves.	محمد حامد المالكي	2023-03-04 09:31:00			3	ar	us		1	ar	unfortunately application failure many time give internet connection message frequently bank check	Negative	1	1	0
Google Play Store	3366bbc5-469a-41d2-a87a-90e928b7c809	The application has been not working for a few days now, I wish they would fix it like the Al Rajhi application. Frankly, it's not convenient.	هيازع القرني	2023-03-03 09:36:00			0	ar	us		1	ar	application work days wish would fix like al rajhi application frankly convenient	Negative	1	1	0
Google Play Store	daa2d33e-0c8e-426a-abc2-df8d01153335	What happened?!! The application stopped working.	قل هذه سبيلي	2023-03-03 08:35:00			0	ar	us		1	ar	happen application stop work	Negative	0	1	0
Google Play Store	8d45cb06-e7fa-437a-91f3-25f8c44bb697	The application is completely stopped and not working.	MASHHOUR AL THUBAITI	##########			0	ar	us		1	ar	application completely stop work	Negative	0	1	0
Google Play Store	7e67678c-9cd8-4833-90d0-11bccd555601	Why is the application not working on my phone for a week? It used to work before, but now when I open my account on the laptop it works fine. Please advise us on the problem, thank you.	Mohammed Ali	##########			0	ar	us		1	ar	application work phone week use work open account laptop work fine please advise us problem thank	Negative	0	1	0
Google Play Store	4b87887f-2ded-4a05-9efc-5d482f313159	I didn't face any problem with the application, so I deleted it and reinstalled it, and authenticated the device in the Blad application. I hope I have helped everyone.	Keven Gub	2023-03-02 04:33:00			0	ar	us		3	ar	didnt face problem application delete reinstall authenticate device blad application hope help everyone	Positive	0	1	0
Google Play Store	bd196c81-9529-468f-8bfe-d483c2cb72db	Very bad.	Ali Albishi	2023-03-02 03:31:00			0	ar	us		1	ar	bad	Negative	1	0	0
Google Play Store	2eb400f2-0eb9-4f28-a743-29fa472c067b	Good, safe.	Alli Wadallnor	2023-03-02 00:44:00			0	ar	us		5	ar	good safe	Positive	0	0	0
Google Play Store	2638a103-c751-40fd-8394-c6ecad35c58f	The application is not working. It suddenly stopped. It cannot connect to the servers.	Amer Amer	##########			0	ar	us		1	ar	application work suddenly stop connect servers	Negative	0	1	0
Google Play Store	29bf2642-15f4-4584-8896-12282c6d230d	Whenever I enter the application, I don't receive the verification code. Instead, I immediately receive a message saying that the login has expired. Anyone who has a solution, please let me know. How many times have I contacted the bank and they couldn't solve the problem.	ابونواف الحر	##########			0	ar	us		1	ar	whenever enter application dont receive verification code instead immediately receive message say login expire anyone solution please let know many time contact bank couldnt solve problem	Negative	0	1	0
Google Play Store	860f7ac4-ea27-42d5-8cb1-3761be6cdf2d	"An excellent and convenient application, with simple procedures."	حمدي الشاذلي	##########			0	ar	us		5	ar	excellent convenient application simple procedures	Positive	0	0	0
Google Play Store	ef0fdb58-217e-4329-aa55-cd4a7c02297f	The application is not working.	FAKHRADDIN MOHAMMED	##########			0	ar	us		1	ar	application work	Negative	0	1	0
Google Play Store	468065d8-78f5-4863-a730-f5318960adef	May God not grant you success. My work stopped because of your trashy application. If there was an option to rate it with garbage instead of a star, I would have chosen it.	siii	##########			0	ar	us		1	ar	may god grant success work stop trashy application option rate garbage instead star would choose	Negative	1	1	0
Google Play Store	0c54ce6d-11b7-4553-ab6a-c39189b07238	The application has been malfunctioning for 3 days now, it seems I will withdraw my wealth from the bank.	عبدالسلام القاسم	##########			0	ar	us		2	ar	application malfunction days seem withdraw wealth bank	Negative	1	1	0
Google Play Store	98c518db-404d-46ca-a734-e792e274e55b	The application is not working for me, even though I have very good internet and all other applications are working very well.	mr happy	##########			0	ar	us		1	ar	application work even though good internet applications work well	Negative	0	1	0
Google Play Store	89df7ac4-09ec-4b80-821e-e79539058670	Idle son of a thief	I- Vcr	##########			0	ar	us		1	ar	idle son thief	Negative	1	0	0
Google Play Store	d12c7d18-a870-48d1-892b-30cbc48e368e	Please solve the problem of the application hanging on the Android device. Please solve the problem as soon as possible. I changed the network, turned off and on the device but without any benefit. I used another working IOS device and there was no problem, which means the problem is with you, developers.	Al8ade7 _ 7SN	##########			6	ar	us		1	ar	please solve problem application hang android device please solve problem soon possible change network turn device without benefit use another work ios device problem mean problem developers	Negative	0	1	1
Google Play Store	2cf78a14-0067-4b43-b92c-b1749bbe7f83	The app is not working on Android. What is happening?	علي العتيبي	##########			0	ar	us		1	ar	app work android happen	Negative	0	1	0
Google Play Store	bb2d8150-f2d3-4785-b2e4-7b4410de96db	The application is not working.	6FSH	##########			0	ar	us		1	ar	application work	Negative	0	1	0
Google Play Store	a7f2acab-f9ae-40d0-ab0f-8df3eaaab29d	The application has stopped working.	Bader Oudeh	##########			0	ar	us		1	ar	application stop work	Negative	0	1	0
Google Play Store	2db7a37d-ddb1-437f-a804-26b2eb04ae38	The application is not working and needs to be renewed in a better way.	Faisal Alotaibi	##########			0	ar	us		2	ar	application work need renew good way	Negative	1	0	0
Google Play Store	8acb76a8-e614-4599-8d13-bc14c81f3e89	The application does not work on an Android device.	ابوعلي عبدالعزيز	##########			0	ar	us		1	ar	application work android device	Negative	0	1	0
Google Play Store	70abc526-a829-4743-8f78-6e1153424124	Delete the application and download it again, it will work, God willing.	Mt My	##########			0	ar	us		5	ar	delete application download work god will	Positive	0	1	0
Google Play Store	967300c6-edd0-41fd-a0c8-45698b75bca0	The application has stopped working for several days.	حب الخير	##########			0	ar	us		1	ar	application stop work several days	Negative	0	1	0
Google Play Store	75d0f126-ec73-45a4-ae80-eb69ce071808	The application is hanging, it is not working, it has been like this for days.	Habib Mohammed	##########			0	ar	us		1	ar	application hang work like days	Negative	1	1	1
Google Play Store	b51c13d8-8836-4e68-ac50-7c04c4d6b6e8	For individuals experiencing login issues, delete the program and download it again, then perform data recovery.	ام خالد	##########			1	ar	us		4	ar	individuals experience login issue delete program download perform data recovery	Neutral	0	1	0
Google Play Store	418a0ec9-c934-41cc-a7dd-c8774f989422	The application is not working for me, despite all other applications working normally.	Abdullah AlZahrani	##########			1	ar	us		3	ar	application work despite applications work normally	Negative	0	1	0
Google Play Store	dcf13ad6-2311-4cfa-b70d-32314934dc92	Unfortunately, the application is very slow and freezing. We kindly request that those concerned take the necessary actions to fix the application. Thank you very much in advance for your cooperation and assistance.	يحيى القحطاني	##########			0	ar	us		2	ar	unfortunately application slow freeze kindly request concern take necessary action fix application thank much advance cooperation assistance	Negative	0	0	1
Google Play Store	d415edab-997b-4e53-92b3-e5ae717270b8	"If the application requests that the server is not working, clear the app's cache and it will open again."	رياض	##########			0	ar	us		5	ar	application request server work clear apps cache open	Neutral	0	1	0
Google Play Store	99f518c8-0c1f-4326-955c-9b040c95ced6	Please, I forgot my username and password, and I called the banking hotline, but no one could help me. I want to inform you that I have deactivated my account and couldn't log in again.	عمر Omar	##########			3	ar	us		5	ar	please forget username password call bank hotline one could help want inform deactivate account couldnt log	Negative	0	1	0
Google Play Store	bb43a97e-1423-4881-b086-63e1bba650cd	Delete the app and download it again, it will work. 👍	ABDULAZIZ Farsi	##########			0	ar	us		5	ar	delete app download work	Positive	0	1	0
Google Play Store	d177c623-b892-42b2-a820-4a991d966791	Failed and deleted, the account is being canceled. Every once in a while, it requests a data update.	بو شهد	##########			0	ar	us		1	ar	fail delete account cancel every request data update	Negative	0	1	0
Google Play Store	f36f9f07-6386-43ad-b619-988110b3f19f	The application is not working after the latest update (unable to connect to the country's servers). Please fix the software issue as soon as possible. Thank you for your cooperation.	Hani البوب	##########			4	ar	us		5	ar	application work late update unable connect countrys servers please fix software issue soon possible thank cooperation	Negative	0	1	0
Google Play Store	a99bfe8c-0643-49d8-bed0-f1f47f03b6e4	The internet fiber is down, and the application has been suspended since yesterday.	Moh Awadh	##########			0	ar	us		1	ar	internet fiber application suspend since yesterday	Negative	0	1	1
Google Play Store	2805cdec-cb06-42b0-83cb-fe1cd704663c	It has been a few days since the application is not opening at all. It shows me a message saying "Connection to the country's servers is not available."	صمت الجروح	##########			0	ar	us		1	ar	days since application open show message say connection countrys servers available	Negative	0	1	0
Google Play Store	3040423a-f4d4-41ed-9c97-6349440e4365	Very bad	#سيف _حسين	##########			0	ar	us		1	ar	bad	Negative	1	0	0
Google Play Store	5aaa4760-1228-4040-9e55-eeb55c1e5fd9	Why didn't the application open?	خالد الحميدي	##########			0	ar	us		5	ar	didnt application open	Neutral	0	1	0
Google Play Store	3aec1a86-2bb7-4820-bea0-983643995db3	It has not been working for approximately three days.	Belal gomaa	##########			0	ar	us		1	ar	work approximately three days	Negative	0	1	0
Google Play Store	aa99c176-beb0-4ffc-abd1-3c212b0b835c	He's been ruined for a week.	abdulrahman almaddallah	##########			0	ar	us		1	ar	hes ruin week	Negative	1	0	0
Google Play Store	8eb07eee-a931-4c4f-9d95-76a27a776b32	"The application has been stopped for days without notification."	Ali ahmed	##########			0	ar	us		1	ar	application stop days without notification	Negative	0	1	0
Google Play Store	d41074bd-f3c4-44e2-bd28-7cd31bae9470	The application freezes and does not open for a week without any reason.	Khalaf Mohamed	##########			0	ar	us		1	ar	application freeze open week without reason	Negative	0	1	1
Google Play Store	b3fc7099-641e-4436-b4f4-d1454db63848	Huawei	حمود الق	##########			0	ar	us		5	ar	huawei	Neutral	0	1	0
Google Play Store	bc7b2988-0e22-4488-aa66-12eca0ad6fe5	The application is rubbish and it only bothers you if you are outside the country and the bank is going from bad to worse... How long will this continue?	ابــو يــاســـــــــــر	##########			0	ar	us		1	ar	application rubbish bother outside country bank go bad bad long continue	Negative	1	0	1
Google Play Store	38dc126a-83ba-4308-a43b-eb8b9911c133	The application is not working, why?	alwan khalid	##########			0	ar	us		1	ar	application work	Negative	0	1	0
Google Play Store	a1441712-f208-418d-88ff-9013971754b0	I deleted the application and then reinstalled it, and it worked properly after it was showing that the internet was weak, despite having a strong network.	Ayoosha	##########			0	ar	us		5	ar	delete application reinstall work properly show internet weak despite strong network	Neutral	1	0	0
Google Play Store	be215764-afe3-4a6c-8e90-770a45c84f01	The application does not work on Android after the update.	نسناس الشمال	##########			0	ar	us		1	ar	application work android update	Negative	0	1	0
Google Play Store	8847cdee-ad87-4bdf-9125-41c88801af8f	The application is not currently working due to the inability to connect to the servers.	العالمي الفيفي	##########			0	ar	us		1	ar	application currently work due inability connect servers	Negative	0	1	0
Google Play Store	85888e83-00d4-4e6b-ba48-3824ab106c48	It's unfortunate to have a banking application at this level.	sa sa	##########			0	ar	us		1	ar	unfortunate bank application level	Negative	1	0	0
Google Play Store	bb6c2cb5-28ab-403a-a9b5-8a11fc36df97	Failed bank	ابو أحمد	##########			0	ar	us		1	ar	fail bank	Negative	1	1	0
Google Play Store	83f0a753-c0ca-464f-8e14-852a8cd4a46d	All applications work for me except the bank. I don't know the reason, if there is a solution, it would be better.	Hadi Safi	##########			0	ar	us		3	ar	applications work except bank dont know reason solution would good	Negative	0	1	0
Google Play Store	15ac3a86-7ac7-4671-9a28-d7961eb7f5e7	"[For program managers and beneficiaries] The application is not working now, it was working 4 days ago."	Neesa.Y.A.K	##########			0	ar	us		1	ar	program managers beneficiaries application work work days ago	Negative	0	1	0
Google Play Store	08337541-cdf7-466a-9783-e50fe2773404	Stopped for three days, what is the problem? It is not connecting to the country's servers for many users.	يوسف البوخشيم	##########			0	ar	us		1	ar	stop three days problem connect countrys servers many users	Negative	0	1	0
Google Play Store	383d99fa-bcd5-4d0c-9a2e-909d81e15a6c	The application says to make sure of the internet, although everything is working fine for me, what's happening?	Nana arrahwan	##########			0	ar	us		1	ar	application say make sure internet although everything work fine whats happen	Neutral	0	1	0
Google Play Store	16a1f553-fc0d-4308-8956-efee406a1918	It does not work.	abu jnna	##########			0	ar	us		1	ar	work	Negative	0	1	0
Google Play Store	4d13dc89-4bcb-4175-8a9a-81004ad1fffe	Very slow, and now I cannot access the application.	ابراهيم الشهراني	##########			0	ar	us		2	ar	slow access application	Negative	0	0	1
Google Play Store	3dd41119-61b8-45f4-819d-8cc72aa290f6	For anyone experiencing application unresponsiveness, please delete the application and download it again. It will work smoothly. Thank you, Banque Al Bilad.	yaser 665665	##########			1	ar	us		5	ar	anyone experience application unresponsiveness please delete application download work smoothly thank banque al bilad	Neutral	0	0	1
Google Play Store	35d60dbf-fef5-4abf-ae6c-97ddf7970f47	The application has a problem. It was working fine two days ago, but when I tried to enter, it said there is a problem with the network, please try again. There has been no result after trying again for more than two days.	Ibrahim Elhoussain	##########			0	ar	us		2	ar	application problem work fine two days ago try enter say problem network please try result try two days	Negative	0	1	0
Google Play Store	7e3e1b55-3c6d-48d9-8994-d16b90144cc7	The application is bad, it doesn't open.	محمد القحطاني	##########			0	ar	us		1	ar	application bad doesnt open	Negative	1	1	0
Google Play Store	03ae5344-f47c-4f0f-bccd-ed340fc68b3a	the worst application that doesn't open properly.	شهاب محمد	##########			0	ar	us		1	ar	bad application doesnt open properly	Negative	1	1	0
Google Play Store	9e839d35-6a48-4d0d-ac5b-1f303a6583d7	An easy and quick program, but it has some shortcomings.	ص. ع.	##########			0	ar	us		5	ar	easy quick program shortcomings	Negative	0	0	0
Google Play Store	2f051f3a-7adc-47ad-95b4-685d9a81669f	The application is not working, and a message saying "self-service is not working" pops up. I have tried deleting the application and reinstalling it multiple times.	Mostafa Gaber	##########			10	ar	us		1	ar	application work message say selfservice work pop try delete application reinstall multiple time	Negative	0	1	0
Google Play Store	4c5542d8-3a4e-4d4d-89cb-68871cc0a4a1	The application is not working very badly.	medo exlance	##########			0	ar	us		1	ar	application work badly	Negative	1	1	0
Google Play Store	4e49c05a-b85c-4dca-8bc3-6c7d214dc3f4	This bank is the worst in every sense of the word.	A.B	##########			0	ar	us		1	ar	bank bad every sense word	Negative	1	0	0
Google Play Store	4b7aeb13-677e-44e8-ab11-b77e418ed482	The application was good but now it is bad. It suddenly stopped working and asks to verify the internet service, even though you are connected properly. Maybe there is a water outage, but the bank did not inform us about it.	بيرو ريان	##########			11	ar	us		1	ar	application good bad suddenly stop work ask verify internet service even though connect properly maybe water outage bank inform us	Negative	1	1	0
Google Play Store	a43e7446-d81d-4aa4-b50a-f510dc9d41b6	Failed application, comment and external links.	saud	##########			0	ar	us		1	ar	fail application comment external link	Negative	0	1	0
Google Play Store	dfcbf5c4-bc61-4f04-8d86-f9b37c90ee8f	The application is honestly bad 😔	Meedo Fg	##########			0	ar	us		1	ar	application honestly bad	Negative	1	0	0
Google Play Store	8eae76f3-8cb3-4eb2-8ab5-46624f8d82a0	It hangs and does not open.	ii2jm`Blue MJd	##########			1	ar	us		1	ar	hang open	Negative	0	1	1
Google Play Store	9390f991-ffc2-4623-baf5-b049638dcb06	Fix the application's problems.	واو	##########			0	ar	us		1	ar	fix applications problems	Negative	0	1	0
Google Play Store	433097ff-4569-4549-9d74-bf7c946c721c	The application is not working and it has the worst interface I have ever seen in bank applications.	fan kal	##########			0	ar	us		1	ar	application work bad interface ever see bank applications	Negative	1	1	0
Google Play Store	be867e0e-2370-48e9-838c-8d07ebf33d21	The application is not working.	Hani Almalki	##########			2	ar	us		1	ar	application work	Negative	0	1	0
Google Play Store	51da6455-58dd-4748-9189-bd7c907d7806	The application was working fine but now it says there is a malfunction in the country's servers. Please try again later.	سيف بسيوني	##########			2	ar	us		1	ar	application work fine say malfunction countrys servers please try late	Negative	0	1	0
Google Play Store	1a086278-322a-4a4d-896f-8650c21e0e93	The app is bad and customer service is also bad, and even the trading wallet has a problem with transferring money. It seems that the person should look for another bank that is better.	الغامدي سعد	##########			0	ar	us		1	ar	app bad customer service also bad even trade wallet problem transfer money seem person look another bank good	Negative	1	0	0
Google Play Store	ca4331e4-1700-42d6-a70b-543450565482	The application is not working, it is not connected to the server.	Jeddah Jeddah	##########			1	ar	us		2	ar	application work connect server	Negative	0	1	0
Google Play Store	d69c8b9b-62d0-4948-b8df-d568bd11823d	The program has not been working since yesterday on Android.	Sayed Elhanfy	##########			1	ar	us		1	ar	program work since yesterday android	Negative	0	1	0
Google Play Store	0c4cb251-46b4-4d97-877c-ee11a80b4c22	The application is not working.	Noof Zahrani	##########			1	ar	us		1	ar	application work	Negative	0	1	0
Google Play Store	e1439ef6-e7a9-4c40-a22c-2380d8342661	The application suddenly stopped working since yesterday and gives me an error message that the servers are not working or not responding, even though my internet connection is excellent, and all other applications are working. Please find a solution to make it work.	Hasan Mashalih	##########			62	ar	us		1	ar	application suddenly stop work since yesterday give error message servers work respond even though internet connection excellent applications work please find solution make work	Negative	0	1	0
Google Play Store	77eaee0a-7e13-4cd8-925e-4b801434e897	Very beautiful.	دفع الله محمد	##########			0	ar	us		5	ar	beautiful	Positive	0	0	0
Google Play Store	a900bf6e-6c9e-464c-926c-d4b08e4896d9	Unstable	Mohamed Saleh	##########			0	ar	us		3	ar	unstable	Neutral	1	0	0
Google Play Store	967ca588-4eca-4ae8-bf62-a885ef88ab71	A very distinctive application	حمدان احمد الحسن	##########			0	ar	us		5	ar	distinctive application	Positive	1	0	0
Google Play Store	26fb57e0-5b39-4892-8f3a-349000117c84	The application has been inactive for two months, and no one wants to fix it. What is wrong with this bank? It says "failed to connect to the server," all the other applications are working except for this one.	دربيل !!	##########			0	ar	us		1	ar	application inactive two months one want fix wrong bank say fail connect server applications work except one	Negative	0	1	0
Google Play Store	bb4bf31a-aadb-4d84-8931-87a4a0c20824	The application is not working (unable to connect to the servers of the country, please try again later). It has not been working since morning until now.	انس قربون	##########			17	ar	us		2	ar	application work unable connect servers country please try late work since morning	Negative	0	1	0
Google Play Store	d85399b0-b656-48bd-8d28-ca05ef2d64df	From bad to worse.	abdallah younis	##########			1	ar	us		1	ar	bad bad	Negative	1	0	0
Google Play Store	e19af8ee-e5ce-4c04-bcac-016274b98859	Every entry to the application shows this message: "Unable to connect to the server. Please try again later."	Mostafa Ragab	##########			10	ar	us		2	ar	every entry application show message unable connect server please try late	Negative	0	1	0
Google Play Store	fa41cb84-7253-4ef2-bfe0-2d4105641158	Excellent	صدام أمين	##########			0	ar	us		5	ar	excellent	Positive	0	0	0
Google Play Store	ae9e8d46-c2f8-49bf-b10a-3454b5b225ea	Unfortunately, it happened and stopped working. Is this the development and the expected service? Is this respecting and appreciating the customer's time? Is this the result of the updates that you demand? I am traveling and I need an outgoing transfer. It's supposed that you charge because of these disrespectful failures in your work.	R129 Marcedes	##########			1	ar	us		1	ar	unfortunately happen stop work development expect service respect appreciate customers time result update demand travel need outgo transfer suppose charge disrespectful failures work	Negative	1	1	0
Google Play Store	57a4270f-cc0d-4289-8eb9-a6ea9eb7536f	The application is not working.	Ahmed Assere	##########			1	ar	us		1	ar	application work	Negative	0	1	0
Google Play Store	de8ea1cb-764f-4c91-a09b-ea66fdaf9c6b	The worst application, every time I try to enter my information, it gives an error, even though everything is correct. I have changed the password more than a million times and entered the same one, but it still shows incorrect. It deserves a negative rating, it's not even worth a star.	ndrx .88	##########			0	ar	us		1	ar	bad application every time try enter information give error even though everything correct change password million time enter one still show incorrect deserve negative rat even worth star	Negative	1	1	0
Google Play Store	f4859ac8-0772-4c66-9519-127236b49711	The application is not working.	Amal Alsawadi	##########			1	ar	us		1	ar	application work	Negative	0	1	0
Google Play Store	43ef089b-6aa7-45f9-ad32-26411e54f475	Wonderful	ابو عدنان	##########			0	ar	us		5	ar	wonderful	Positive	0	0	0
Google Play Store	e5f188b4-81d2-42ec-8dc4-f154d69e36c5	The application does not say anything except "Make sure you have an internet connection" despite having a strong internet. It is a bad application that does not work.	Ahmed Zezo	##########			50	ar	us		1	ar	application say anything except make sure internet connection despite strong internet bad application work	Negative	1	1	0
Google Play Store	5e853358-988f-4f47-81ef-0d72bfe5032a	Excellent and very modern.	Samirah Almalki	##########			0	ar	us		5	ar	excellent modern	Positive	0	0	0
Google Play Store	36982804-7323-4084-bb1f-c78a70b871eb	A failed, failed, failed application.	Galal Oamr	##########			0	ar	us		1	ar	fail fail fail application	Negative	0	1	0
Google Play Store	d7b0d15c-076a-4f97-ba07-ed8f56042049	Excellent	احمد الداهشي (ابوزياد)	##########			0	ar	us		5	ar	excellent	Positive	0	0	0
Google Play Store	00ac9dfd-9dc7-40ae-9f85-2d1142cfafbb	The application does not accept registration and the online account services are not working.	Ahmed Hafez	##########			0	ar	us		1	ar	application accept registration online account service work	Negative	0	1	0
Google Play Store	63eb5704-be21-4b79-8287-aea280901ce4	An old client at the bank and a car was taken through the bank's lease-to-own system. After five years, when settling with them, it became clear that the registration was expired two years ago and I was charged all fees for not renewing it, without being informed by them to renew the registration or pay the ownership transfer fees. I demanded that the ownership be transferred through exhibitions …	ابو ابراهيم البقمي	##########			0	ar	us		1	ar	old client bank car take bank leasetoown system five years settle become clear registration expire two years ago charge fee renew without inform renew registration pay ownership transfer fee demand ownership transfer exhibitions pay riyals complaint file sales department matter action take deliver second key two weeks pass since transfer procedures delivery make fail management standards	Negative	1	1	0
Google Play Store	492d959e-0d73-476e-9e9e-96eac5d06659	Many stars for the application and its services, bad user interface, constant lagging, sometimes doesn't work, and doesn't accept the password.	ggg ooo	##########			0	ar	us		1	ar	many star application service bad user interface constant lag sometimes doesnt work doesnt accept password	Negative	1	1	0
Google Play Store	b691a99b-1efb-409c-bd40-d071ee4b3e3c	Unfortunately, the application is bad on Android... It is not up to the standards of a distinguished bank like Al Bilad Bank... I hope you reconsider it... The Arabic language does not function properly.	ابو عمر	##########			0	ar	us		1	ar	unfortunately application bad android standards distinguish bank like al bilad bank hope reconsider arabic language function properly	Negative	1	0	0
Google Play Store	c9b75c08-8ea6-47ea-af10-0a319d00f18e	An application that is not worth using and lacks qualified support to solve the problems of the Mobile Net and Online Net applications. It only redirects users to transfer their accounts to banks that have support experts for applications or a system sufficient to solve login problems through the application and recover usernames and passwords without conflicting with search engines.	saeed basakran	##########			10	ar	us		1	ar	application worth use lack qualify support solve problems mobile net online net applications redirect users transfer account bank support experts applications system sufficient solve login problems application recover usernames passwords without conflict search engines	Negative	0	1	0
Google Play Store	2118eaf7-f4a2-45b7-8b3f-2584d47f360f	Complicated, I tried several times to open an account or log in quickly but I couldn't, and the reasons are strange and incorrect.	فهد الخليفي	##########			1	ar	us		1	ar	complicate try several time open account log quickly couldnt reason strange incorrect	Negative	1	1	0
Google Play Store	e3171042-682a-48ed-a2fb-a2a956cba039	Excellent and time-saving. The right time for you.	وليد احمدفؤاد	##########			0	ar	us		5	ar	excellent timesaving right time	Positive	0	0	0
Google Play Store	eeee6f19-6988-43cc-afc6-8c2c4558ce8f	The worst application I have ever used in my life. It's complicated and I regret opening a bank account with AlBilad Bank. I swear, the application is exhausting and confusing. When you try to register your IBAN, it tells you that it's incomplete and it's true; I registered it more than 20 times. When you try to register your name, it tells you that the letters cannot be repeated, but they are no…	حمدي ابونجلاء	##########			0	ar	us		1	ar	bad application ever use life complicate regret open bank account albilad bank swear application exhaust confuse try register iban tell incomplete true register time try register name tell letter repeat try time come password thats become real hassle enter word none work contact customer service tell take screenshots send email review application find solution	Negative	1	1	0
Google Play Store	2b43e8e5-2cb9-4b0e-9107-1ebbc5605a72	By Allah, this application is extremely poor. Look at the page where the writings and numbers intertwine. In addition, the account only shows a portion of the numbers. By Allah, this application does not befit the prestigious, luxurious, and distinguished mobile application of this esteemed bank.	ابو امين	2023-02-08 09:39:00			0	ar	us		1	ar	allah application extremely poor look page writings number intertwine addition account show portion number allah application befit prestigious luxurious distinguish mobile application esteem bank	Negative	1	0	0
Google Play Store	e3385d87-0ccc-4018-b444-29de4d732bb1	good	بشير ابو الرجال	2023-02-08 07:31:00			0	ar	us		5	ar	good	Positive	0	0	0
Google Play Store	85473818-a7b5-4a5d-8710-dabedf8fea5f	Thank you.	Nayal Ahmed	##########			0	ar	us		5	ar	thank	Positive	0	0	0
Google Play Store	b2c2656b-9289-4393-8af6-ac56571b84ae	The application is not working on Android.	2019 physics	2023-02-04 07:09:00			0	ar	us		1	ar	application work android	Negative	0	1	0
Google Play Store	00450150-4291-4969-a3d4-f181a4f6877e	Difficult to deal with.	السلطان السلطان	##########			0	ar	us		1	ar	difficult deal	Negative	1	0	0
Google Play Store	84d9f303-d75a-4d73-ba28-95ce28e7a12a	Very bad, it asks for device authentication but does not enter the application. It is a continuous failure of the country in a flawed system.	AM -	##########			6	ar	us		1	ar	bad ask device authentication enter application continuous failure country flaw system	Negative	1	1	0
Google Play Store	f5882af9-5952-468f-bcfb-8417d6b9b3a5	It didn't work with me.	اسما عيل	##########			0	ar	us		1	ar	didnt work	Negative	0	1	0
Google Play Store	08fcfaed-e3ab-4a88-a660-93a2a4fad934	Thank you for the excellent services.	موسى علي	##########			0	ar	us		2	ar	thank excellent service	Positive	0	0	0
Google Play Store	8875d0d2-da36-45ea-8f49-57e86693619a	The application refuses to install and shows that there is a problem.	Mohammed Abdelmoteleb	##########			0	ar	us		1	ar	application refuse install show problem	Negative	0	1	0
Google Play Store	fa7b36fc-a331-426f-ae85-ff9fae0f5879	Excellent	ابو سعد	##########			0	ar	us		5	ar	excellent	Positive	0	0	0
Google Play Store	e89521e6-fdb0-4eae-861f-7a7bff204953	The application is not working, I'm a new user and when I enter my data, it tells me that the service is not available at the end!	عبدالسلام	##########			4	ar	us		1	ar	application work im new user enter data tell service available end	Negative	0	1	0
Google Play Store	9039bd2a-4d38-498b-bbfd-e4451bdbe241	Honestly, the application is very bad and every time I open it, it gives me a message saying "Please check your internet connection"?! And my internet is excellent and working.... Please solve this problem quickly to avoid getting stuck.... I can't perform any quick or sudden transfer operations to another account or between my personal accounts in other banks.	jejedreams	##########			22	ar	us		1	ar	honestly application bad every time open give message say please check internet connection internet excellent work please solve problem quickly avoid get stick cant perform quick sudden transfer operations another account personal account bank	Negative	1	1	1
Google Play Store	5aac4a73-fd41-4a10-abc7-62bd99a90997	Excellent	Ziad Serieh	##########			0	ar	us		5	ar	excellent	Positive	0	0	0
Google Play Store	4173ae95-62e1-4577-98ec-f2211e638889	Unfortunately, the app is very bad on Android and I expect it to be different on non-Android devices.	sahs 1991	##########			1	ar	us		1	ar	unfortunately app bad android expect different nonandroid devices	Negative	1	0	0
Google Play Store	9b5f6b74-c520-4bc6-8bfe-c95993a9b4a2	Your worst procedures... I cannot open an account online. Every time I complete the procedures and verify with the national ID, the process gets cancelled. Other banks do not take more than 5 minutes to open an account online. I do not recommend dealing with you at all.	Anas Abas	##########			0	ar	us		1	ar	bad procedures open account online every time complete procedures verify national id process get cancel bank take minutes open account online recommend deal	Negative	1	1	0
Google Play Store	7894c7a1-2794-49c9-968e-62ba3b36afd9	The application needs modification and improvement. Account numbers appear overlapped with balance amounts. Phrases are jumbled with each other or with application windows and tools. The appearance of the application and the arrangement of windows and tools are very delayed compared to other similar applications for Saudi banks.	عبدالله القشاش	##########			1	ar	us		1	ar	application need modification improvement account number appear overlap balance amount phrase jumble application windows tool appearance application arrangement windows tool delay compare similar applications saudi bank	Negative	1	1	1
Google Play Store	915b03b9-67ee-42cb-828d-3a8bbd3b9628	Dumb program does not work.	عاصم عبدالله	##########			0	ar	us		1	ar	dumb program work	Negative	1	1	0
Google Play Store	1279cb6e-f130-4992-8e86-8c042f1c9096	The summit of magnificence/beauty	فلاح العنزي	##########			0	ar	us		5	ar	summit magnificencebeauty	Positive	0	0	0
Google Play Store	004f1ac1-d4b7-49ab-be39-ee9d55878a0b	The application is heavy and does not open. Every time I enter, it says "username or password is incorrect."	سالم النهدي	##########			0	ar	us		5	ar	application heavy open every time enter say username password incorrect	Negative	0	1	1
Google Play Store	bb9ff7d2-7b01-4356-b779-1598b908456d	The application is a failure... it doesn't work.	Add Dtd	##########			0	ar	us		2	ar	application failure doesnt work	Negative	0	1	0
Google Play Store	dfea5358-07d8-4105-ae9b-ee6f6e14771c	Prepaid flow options are only three options: 100, 200, and 300. Why?	ناصر الحربي	##########			1	ar	us		1	ar	prepay flow options three options	Neutral	0	1	0
Google Play Store	6f199139-f28d-4440-a498-a8fbb748f292	The application is excellent, but for a few days, it has been converted to English and displays an error. When I change the language to Arabic, the application freezes. Please solve the problem.	عبدالغني اسماعيل	##########			2	ar	us		3	ar	application excellent days convert english display error change language arabic application freeze please solve problem	Negative	0	1	1
Google Play Store	baf8ef7a-92d2-4f33-92cb-d4920231d4a3	Unfortunately, on Android screens, information appears on top of each other. The account balance appears in the middle of the screen, with other numbers behind it, and the account number behind the name. At the top of the screen, the number does not appear in full due to the options available such as (current/savings/vault). Unfortunately, the problem has not been solved in multiple updates.	abu raad	##########			0	ar	us		4	ar	unfortunately android screen information appear top account balance appear middle screen number behind account number behind name top screen number appear full due options available currentsavingsvault unfortunately problem solve multiple update	Negative	1	1	0
Google Play Store	e28fdfec-242f-4f33-ac58-f171f31e2bda	It doesn't open for me at all.	xhipfx	##########			0	ar	us		1	ar	doesnt open	Negative	0	1	0
Google Play Store	d7119b41-9d13-4b94-9154-a8fbc587acfd	Very bad program and too many comments.	hmod ALRWILI	##########			0	ar	us		1	ar	bad program many comment	Negative	1	0	0
Google Play Store	b7d4ea90-a94e-4b4a-91ce-afd841b7ff86	Excellent bank but it has few branches.	ابو عبدالرحمن	##########			0	ar	us		4	ar	excellent bank branch	Positive	0	0	0
Google Play Store	1eed8b3a-f5a2-4920-8658-b3ab6002e9c0	Every update is worse than the other and it doesn't work.	Ahmed O.A	##########			0	ar	us		1	ar	every update bad doesnt work	Negative	1	1	0
Google Play Store	40357d38-5340-43db-bef4-f77b789e1a6a	The application is not working on my Android device. It appears that the problem is with the connection due to the internet, even though all other applications are working fine. Sometimes it tells me that it has been blocked by a warning. Note that I am able to log in from my laptop.	Hani 7	##########			122	ar	us		2	ar	application work android device appear problem connection due internet even though applications work fine sometimes tell block warn note able log laptop	Negative	0	1	0
Google Play Store	02259946-3a8e-4962-ae2c-fb266129ba6b	Very excellent.	عبد العاطي مالك	##########			0	ar	us		5	ar	excellent	Positive	0	0	0
Google Play Store	0bf0fcbd-d105-4560-99fb-53a69b2af0d2	The application is not working at all.	صمت الحق	##########			0	ar	us		1	ar	application work	Negative	0	1	0
Google Play Store	747dffa3-720b-4539-bd80-bd0b2b93c336	The country. And nothing is more beautiful than it.	عبدالرحمن محمد	##########			0	ar	us		5	ar	country nothing beautiful	Positive	1	0	0
Google Play Store	16ac6220-2258-4fc2-b4a1-ba286d2e3d7b	Wonderful, wonderful, wonderful.	خالد الدحام	##########			0	ar	us		5	ar	wonderful wonderful wonderful	Positive	0	0	0
Google Play Store	5902062f-10ec-4d0c-8151-b41f05e21d04	The application is not working well.	بسام الحميدي	##########			0	ar	us		1	ar	application work well	Negative	0	1	0
Google Play Store	3fce7527-1878-4e3d-8f68-0e091241cc78	Please update the automatic expiration of residency or provide an option for it within the application instead of contacting the bank by phone or going to the branch.	Ahmed Yousry	##########			4	ar	us		4	ar	please update automatic expiration residency provide option within application instead contact bank phone go branch	Neutral	0	1	0
Google Play Store	356a13e4-f51c-4ad7-9d9c-d5c970adb6f5	It is not excellent for me all day and the application did not respond accurately to them and they did not do it for me the application.	احمد الراجحي	##########			0	ar	us		1	ar	excellent day application respond accurately application	Negative	1	0	0
Google Play Store	f55cdb83-f658-4542-9ca1-616ecb9d1d65	Splendor	عبدالله مجرشي	##########			0	ar	us		5	ar	splendor	Positive	0	0	0
Google Play Store	99245df6-1db8-4f4c-ad05-62c29d0a912f	Easy to deal with and highly secure.	Ali Algamdi	##########			0	ar	us		5	ar	easy deal highly secure	Positive	0	0	0
Google Play Store	768cad07-ed27-4ce2-a088-fb4d0b948c84	One of the worst things I have ever seen.	سلطان	##########			0	ar	us		1	ar	one bad things ever see	Negative	1	0	0
Google Play Store	79ce624f-70df-47ce-9674-9701649adc0c	I want to download the Bank AlBilad app, but it's not downloading for me for a long time, it's not working.	محمد الحارثي	##########			0	ar	us		1	ar	want download bank albilad app download long time work	Negative	0	1	0
Google Play Store	74a2e075-ccd1-4382-9225-3f261be78903	Very wonderful	منصور الحربي	##########			0	ar	us		5	ar	wonderful	Positive	0	0	0
Google Play Store	6270b415-d7e2-413e-a368-2a3548a4a360	The application hasn't been opening for a while. It's unbelievable what is happening, guys! 🤪	المقبل ابوهشام	##########			0	ar	us		1	ar	application hasnt open unbelievable happen guy	Negative	1	1	0
Google Play Store	e7542134-2d6e-4af6-aebf-e7f8da4328e9	"Bank of Misery"	Commander Bradley	2023-01-06 00:10:00			0	ar	us		1	ar	bank misery	Negative	1	0	0
Google Play Store	b06f47dc-d281-4951-b436-ba390d18ab5e	The application is like 💩💩💩💩💩💩💩💩.	علي البحري	##########			0	ar	us		1	ar	application like	Negative	0	0	0
Google Play Store	637f4b7c-bf43-4e9c-bb5f-bcbc6b452cc1	Does not work outside Saudi Arabia.	نافذتي للعالم	2023-01-03 07:31:00			0	ar	us		1	ar	work outside saudi arabia	Negative	0	1	0
Google Play Store	b8720e77-253c-401f-ac7d-b561a2ad9a00	Excellent very very very	غشيم نت	2023-01-03 06:08:00			0	ar	us		5	ar	excellent	Positive	0	0	0
Google Play Store	20434e86-3d9b-419a-a055-2898c5f71780	The application is not working.	Anwar Khan	##########			0	ar	us		1	ar	application work	Negative	0	1	0
Google Play Store	726fbdb2-ce13-4dff-bee8-e84a930b5f30	The first banking application was a mock-up.	مكين اتحادي	##########			0	ar	us		1	ar	first bank application mockup	Neutral	1	0	0
Google Play Store	d92e338c-12b5-48d9-af95-0fc95335670b	One of the best banks in terms of dealing.	مشاري الدوسري	##########			0	ar	us		5	ar	one best bank term deal	Positive	0	0	0
Google Play Store	a26280fe-ee37-4974-b43b-937f747fefb1	Special 99	خالد 2200	##########			0	ar	us		5	ar	special	Neutral	0	0	0
Google Play Store	40117c8d-eef0-4298-8358-b34c2be27b42	"The application is very bad."	سعد سماح	##########			0	ar	us		1	ar	application bad	Negative	1	0	0
Google Play Store	ed9c7f36-2128-4de3-9bce-6e5b46f9c139	He is very unsuccessful.	Foumturki Alturki	##########			0	ar	us		1	ar	unsuccessful	Negative	1	0	0
Google Play Store	2732559c-c5b6-4967-b84d-5e3b2e748def	The application is extremely, extremely slow. It crashes every second.	محمد منصور	##########			1	ar	us		1	ar	application extremely extremely slow crash every second	Negative	1	1	1
Google Play Store	3ebdcc2f-2640-4b31-94bb-33b57a293d2e	easy	abdullah a	##########			0	ar	us		5	ar	easy	Positive	0	0	0
Google Play Store	09be84f9-05be-47a6-990e-ca79f4419d51	The application is bad, slow, and it freezes.	العتمي ابو حسين	##########			0	ar	us		1	ar	application bad slow freeze	Negative	1	0	1
Google Play Store	616c611f-05a3-43b2-babd-6093e0ba3024	The application is not working.	احمد	##########			0	ar	us		1	ar	application work	Negative	0	1	0
Google Play Store	01be11f1-07b3-41a2-92d2-bbce90d68281	"The bank application is constantly failing. The session expires frequently, and you are not connected to the internet, even though other applications are excellent and fast."	اكرم المحسني Y E	##########			4	ar	us		1	ar	bank application constantly fail session expire frequently connect internet even though applications excellent fast	Negative	0	1	0
Google Play Store	95b3e8f2-89d5-4f91-8bf3-b7c17c9635e9	The application is bad and slow... And it doesn't work in some countries, which causes you problems.	kaka lala	##########			4	ar	us		1	ar	application bad slow doesnt work countries cause problems	Negative	1	1	1
Google Play Store	28fb2518-0a9d-424d-ba5b-f4512450e801	Unfortunately, every now and then it gives me an error and automatically exits. What is the solution?	أبو محمد	##########			1	ar	us		1	ar	unfortunately every give error automatically exit solution	Negative	0	1	0
Google Play Store	e035b3b3-7b46-473e-a61f-7446ccc5b43c	Very nice.	علي مثنى	##########			0	ar	us		5	ar	nice	Positive	0	0	0
Google Play Store	4ddc5985-a1cf-4652-9cf9-b276dd0ec616	The application is not downloading. Please provide a solution to this problem.	NIMAH MOHAMMED	##########			1	ar	us		1	ar	application download please provide solution problem	Negative	0	1	0
Google Play Store	eb6d9411-ba2d-4dac-b10f-b6cbfffbb321	The worst experience.	abdulnasser sabaallil	##########			0	ar	us		1	ar	bad experience	Negative	1	0	0
Google Play Store	7bcabde0-e1d6-447e-b7a1-8ba4850f1f1b	There is no update for the expiration date of the national ID through the application, like other banks. It is necessary to visit the branch. We kindly request adding a special section for the electronic update of the national ID through the country's application. Thank you.	Bojan Khan	##########			0	ar	us		3	ar	update expiration date national id application like bank necessary visit branch kindly request add special section electronic update national id countrys application thank	Neutral	0	1	0
Google Play Store	050e1bfe-ceb7-4283-8d43-7835cdf8d35a	And then with you, we said it could be from the mobile phone, so we changed the mobile phone. Also, today I went to the branch and changed the password a million times. Help us and set us free.	ود البلد	##########			0	ar	us		1	ar	say could mobile phone change mobile phone also today go branch change password million time help us set us free	Neutral	0	1	0
Google Play Store	9b070c5f-5873-4095-83f6-0e960ffc2bc3	A highly faulty application. Please solve the problem.	قناة فهد النصراوي العالمي	##########			0	ar	us		1	ar	highly faulty application please solve problem	Negative	1	1	0
Google Play Store	60815420-a758-4696-9814-4d3c1d36cd74	The application is bad for activating accounts. I enter the required number in the call, but it doesn't activate. I go to the bank to activate it and then return to the application, but it is still not activated. Very bad.	A G	##########			2	ar	us		3	ar	application bad activate account enter require number call doesnt activate go bank activate return application still activate bad	Negative	1	1	0
Google Play Store	90ec71b6-0ac7-4b16-a030-0a272835f796	The application is not working at all. The service is not suitable at all.	Omar Kamel	##########			0	ar	us		1	ar	application work service suitable	Negative	1	1	0
Google Play Store	63467579-d577-42ea-a011-3b0c1250de1c	Beautiful	شيف ماهر أبو عمار	##########			0	ar	us		5	ar	beautiful	Positive	0	0	0
Google Play Store	2f9df996-2369-4ec2-9abf-1921900aa476	It doesn't open for me, and the password is usually incorrect.	Blue Sky	##########			2	ar	us		1	ar	doesnt open password usually incorrect	Negative	0	1	0
Google Play Store	87eac466-3209-40fc-865a-4d059677e9db	The application is not working with the latest update.	Hussam Shareef	##########			2	ar	us		1	ar	application work late update	Negative	0	1	0
Google Play Store	287b2002-a946-49b7-8c99-d0b3c066bf96	A failed bank with easily penetrable accounts, one of the banks whose accounts are easily breached.	Drama Egypt TV	##########			0	ar	us		1	ar	fail bank easily penetrable account one bank whose account easily breach	Negative	0	1	0
Google Play Store	15e6a5d0-7979-4b9b-8c45-a8ef27dc8e58	The application was working perfectly fine for me, but now it has completely stopped working, even though my internet connection is good and all other programs are working perfectly fine. Please help us, may God have mercy on you.	عبدالرحمن أبوعمر الحلواني	##########			110	ar	us		5	ar	application work perfectly fine completely stop work even though internet connection good program work perfectly fine please help us may god mercy	Negative	0	1	0
Google Play Store	ff108343-8dd8-478e-b941-1b6a624be699	The latest update needs an update.	ufc saudi-arabia	##########			1	ar	us		1	ar	late update need update	Neutral	0	1	0
Google Play Store	61228a85-36ac-44ee-af93-9fed5f514807	This application I call it "The Disaster" or "The Irritant", unfortunately, when you try to transfer from one account to another, it takes a long time and hangs up, causing you to fail with people. If you buy something and want to transfer it to someone, it hangs up and takes a long time, and unfortunately, the transfer is not sent. Oh, enough with you, National Bank!	محمد Mohammed l	##########			0	ar	us		1	ar	application call disaster irritant unfortunately try transfer one account another take long time hang cause fail people buy something want transfer someone hang take long time unfortunately transfer send oh enough national bank	Negative	1	1	1
Google Play Store	cd69efff-4765-4f91-a191-f67134bacd27	Peace be upon you and the mercy and blessings of Allah. It is not possible to install and update the application. Please work on resolving this issue. And may you remain well.	hanadi Ahmad	##########			0	ar	us		1	ar	peace upon mercy blessings allah possible install update application please work resolve issue may remain well	Neutral	0	1	0
Google Play Store	4e17ffae-6207-4651-908c-6f0bc1097876	The bank is very bad and their application is even worse as it does not work outside the country. When you withdraw money from the ATM, it gives you the wrong PIN number. If you contact the bank, they tell you to use the internet and solve your problem through their online service. Thank God, my salary is not deposited with them and I do not have a significant transaction with them.	aman alaman	##########			0	ar	us		1	ar	bank bad application even bad work outside country withdraw money atm give wrong pin number contact bank tell use internet solve problem online service thank god salary deposit significant transaction	Negative	1	1	0
Google Play Store	ec263a33-8a46-4d6b-bb18-a2ea1abb1a13	What happened? He got stuck.	صالح ابوعبدالله	##########			0	ar	us		1	ar	happen get stick	Neutral	0	0	1
Google Play Store	c5602f80-1f5f-4b1c-bddc-b1af1eed7944	The application is not working, it's a failure. What kind of failure are you experiencing?	باسم أبو صالح	##########			0	ar	us		1	ar	application work failure kind failure experience	Negative	1	1	0
Google Play Store	747e559d-b153-4bea-bfaf-ec6e51d57c30	Failure is attached and slow to the knowledge. The bank's capital is 100 billion.	‪SKM “SKM” Skm‬‏	##########			0	ar	us		1	ar	failure attach slow knowledge bank capital billion	Negative	1	0	1
Google Play Store	227a8dbd-8185-49b4-8854-fa72dd12de71	Brother, why does he criticize and judge those who live outside the kingdom? It would be better if he solves the problem. Please.	عدنان عامر	##########			0	ar	us		1	ar	brother criticize judge live outside kingdom would good solve problem please	Negative	1	0	0
Google Play Store	83c07e63-33a6-4a66-9c32-9d9e5b28ca38	Yesterday's application is bad, I can't transfer money from my account.	E.Aldeen B.M.Edrees	##########			0	ar	us		1	ar	yesterdays application bad cant transfer money account	Negative	1	1	0
Google Play Store	f19f3ce8-a232-4ade-9dfe-c950b31252e6	The application sucks in every sense of the word 👎	west True	##########			0	ar	us		1	ar	application suck every sense word	Negative	1	0	0
Google Play Store	f5f22305-4a62-4fa2-8eed-91b3afdaaf23	Very bad... I want to enter, but it says there is no compliance.	ali sha	##########			0	ar	us		1	ar	bad want enter say compliance	Negative	1	1	0
Google Play Store	08e8126d-9e26-47e1-a3a7-5a7f90cbad12	Excellent and we hope for further development and improvement.	علي ابو سيف	##########			0	ar	us		5	ar	excellent hope development improvement	Positive	1	0	0
Google Play Store	4a3d5d3e-cb0e-42d1-afea-cb20f3118e4e	Excellent and one of the best banks.	محمد صالح	##########			0	ar	us		5	ar	excellent one best bank	Positive	0	0	0
Google Play Store	768dec60-2ef3-4747-8f4b-31e10006edfc	Very hot	Mr Rashad	##########			0	ar	us		1	ar	hot	Positive	0	0	0
Google Play Store	438c6f5e-34ed-4c01-9903-86fdd1652ebc	Very, very bad application.	راعي لوري	##########			0	ar	us		1	ar	bad application	Negative	1	0	0
Google Play Store	7f702b7f-481d-4da5-9dba-99679505d335	Bad	Saad Ali	##########			0	ar	us		1	ar	bad	Neutral	1	0	0
Google Play Store	4df751c2-d868-4a67-99f8-90cb08bfb1d0	Unfortunately, every time I try to log in, it tells me that the username is already being used. The app needs an update and fixing. Honestly, I am very upset because I cannot join the app, and the reason is not important. Every time it gives a different reason, either the username or the password contains English letters. I might cancel my account with this bank and go to another bank like Al Raj…	‪Yasser Hassan (‫ياسر أبو شهاب‬‎)‬‏	##########			1	ar	us		1	ar	unfortunately every time try log tell username already use app need update fix honestly upset join app reason important every time give different reason either username password contain english letter might cancel account bank go another bank like al rajhi app excellent	Negative	1	1	0
Google Play Store	fd4ea811-d41e-4a21-8093-d230b55adfca	Quick login does not allow you to perform any transactions. The service is useless, it just allows you to view information. It is not like Al-Rajhi or Al-Ahli Bank, which rely on quick login and all transactions are done through it.	Abu Fahad Sa	##########			26	ar	us		4	ar	quick login allow perform transactions service useless allow view information like alrajhi alahli bank rely quick login transactions do	Negative	0	1	0
Google Play Store	f050c9b1-5b91-4930-8870-0cb8fe3c8278	From bad to worse.	jehad shuaib	##########			0	ar	us		1	ar	bad bad	Negative	1	0	0
Google Play Store	c66bc35d-e3fb-4896-a815-1eb62641226c	The application has been not opening for a week, before it was easy and beautiful, but now it is very very very bad.	Mohamed 7ager	##########			0	ar	us		1	ar	application open week easy beautiful bad	Negative	1	0	0
Google Play Store	c221bd8e-bf01-4025-9daa-639613aa8b99	Congratulations	محب اهل الله واهل القرآن	##########			0	ar	us		5	ar	congratulations	Positive	0	0	0
Google Play Store	c6f549bc-7612-4ef3-ac83-e262bf6b1e85	It doesn't open since yesterday.	Omar Shamri	##########			0	ar	us		1	ar	doesnt open since yesterday	Negative	0	1	0
Google Play Store	18d61ffc-050b-4683-aab8-3921ec56ee91	It does not open.	متع متع	##########			0	ar	us		1	ar	open	Neutral	0	1	0
Google Play Store	6d250580-5408-4d49-ba0d-959f9dfa66e0	The latest update, unfortunately, is bad. We expected it to be better in use, but for more than 4 days, the application does not work when entering. The download takes a long time and is not completed. Please solve the problem so that it can be used as required.	‪Khaled Alsemairy (GulfOud)‬‏	##########			0	ar	us		1	ar	late update unfortunately bad expect good use days application work enter download take long time complete please solve problem use require	Negative	1	1	0
Google Play Store	00a11f13-3c02-41a2-8431-eccfcb7649dd	The app needs development and adjustment in terms of font control as well as the way of dealing with it. Most banks regularly work on improving their applications, except for the country you are in, where neither updates nor fixing mistakes occur, which is unfortunate.	أنور القيسي	##########			46	ar	us		1	ar	app need development adjustment term font control well way deal bank regularly work improve applications except country neither update fix mistake occur unfortunate	Negative	1	1	0
Google Play Store	9d95ee7b-6de2-4029-b2da-5afdeacaeab5	nice	محمد الهناهي	##########			0	ar	us		5	ar	nice	Positive	0	0	0
Google Play Store	a2aa1b94-2745-44d3-b187-dcc3a8824ac0	The application is not working.	Asker Ali	##########			0	ar	us		1	ar	application work	Negative	0	1	0
Google Play Store	621e0365-384b-44cf-94a0-1829e0a5a22e	It doesn't work and I have tried many times.	Waleed kh	##########			0	ar	us		1	ar	doesnt work try many time	Negative	0	1	0
Google Play Store	ec9c98da-5dfe-42de-a2ac-fd9e1a7af467	It doesn't work for me.	sahar kh	##########			0	ar	us		1	ar	doesnt work	Negative	0	1	0
Google Play Store	42e868dd-c7f9-4fe0-8c65-dc9d81a8f256	The application has not been working for me for 3 days, it does not open. What is the reason?	wvw505 خالد القحطاني	##########			0	ar	us		1	ar	application work days open reason	Negative	0	1	0
Google Play Store	ba1f73a9-a122-4b3f-9dfa-e53c741d7e23	Good	كريم العنزي	##########			0	ar	us		4	ar	good	Positive	0	0	0
Google Play Store	3f92ee42-3d9f-44d9-9e96-497964659b5b	The bank's salary deposit application is not working and has been stuck for more than 48 hours. It's ridiculous.	Ib Ra	##########			1	ar	us		1	ar	bank salary deposit application work stick hours ridiculous	Negative	0	1	1
Google Play Store	7e30b957-9f75-42ce-9cdc-0bd449ed3264	He wouldn't let me in. Even after I deleted it and brought it back, he still wouldn't let me in. It keeps freezing all the time.	مها محمد	##########			0	ar	us		1	ar	wouldnt let even delete bring back still wouldnt let keep freeze time	Negative	0	0	1
Google Play Store	2ce42188-96c1-4c6c-a242-f325deefb5fc	The application is not working today! What is the problem?	BASSAM	##########			0	ar	us		4	ar	application work today problem	Negative	0	1	0
Google Play Store	91b64d47-858f-438e-80f0-41689430d5dd	It needs many updates. It is very slow in registering beneficiaries. It often registers a lack of network connection, although the network is very good. It freezes a lot in the middle of financial transactions. Bank Al-Bilad is excellent in everything except for the application. The application is below the standard. Please address these issues in the upcoming update. It does not work at all on F…	Ibrahim Alsheikh	##########			10	ar	us		1	ar	need many update slow register beneficiaries often register lack network connection although network good freeze lot middle financial transactions bank albilad excellent everything except application application standard please address issue upcoming update work fridays saturdays sunday th november work	Negative	0	1	1
Google Play Store	d033cb00-a0dd-4296-b64a-41595fb99214	Bad bank and bad application, may God destroy you.	عبدالرحمن العمري	##########			0	ar	us		1	ar	bad bank bad application may god destroy	Negative	1	0	0
Google Play Store	4d7b8939-91a0-4459-a01f-1efa3bd0916f	There are many problems, including them telling me that it is not possible to make a transfer due to exceeding the daily transfer limit, while I haven't made any transfers in the first place. I went back to the bank without any benefit, and the completion was also without any benefit. Give us solutions, O bank!	مطر حجازي	##########			0	ar	us		1	ar	many problems include tell possible make transfer due exceed daily transfer limit havent make transfer first place go back bank without benefit completion also without benefit give us solutions bank	Negative	1	1	0
Google Play Store	a5b1c050-138a-4cd7-a641-69fbf4107c9a	After the latest update, it has become very bad and we cannot access through it.	Saqqar Ayed	##########			0	ar	us		1	ar	late update become bad access	Negative	1	0	0
Google Play Store	9de6c193-5902-482f-887c-031024ba9611	Excellent very good	Saj000000	##########			0	ar	us		5	ar	excellent good	Positive	0	0	0
Google Play Store	8a7fa1c4-f56f-4553-8d5d-56bf428c3452	There are many application errors. Every time I try to log in, I get the message "Login session expired." Despite having such a market value and significant income, the bank cannot operate a good application!! However, it is not to blame as there is a lawyer representing the central bank. What's wrong with you?	Salem Alshehri	##########			3	ar	us		1	ar	many application errors every time try log get message login session expire despite market value significant income bank operate good application however blame lawyer represent central bank whats wrong	Negative	1	1	0
Google Play Store	c3fb649f-93d5-4c18-a9df-47eaef415cec	The application doesn't open every time I enter and register. It says the data is incorrect or there is an error.	حسن على حسن على	##########			0	ar	us		1	ar	application doesnt open every time enter register say data incorrect error	Negative	0	1	0
Google Play Store	6a9193df-df69-4f71-95bc-73e1cc7af1eb	Thank God I switched to another bank, and I really noticed the difference. It was so bad, so bad, so bad. It took more than a week and I raised numerous complaints through various bank channels because of the lack of notifications and verification code messages. There is no response whatsoever. They don't care about customer satisfaction at all!	أبو سعد الشهري	##########			0	ar	us		1	ar	thank god switch another bank really notice difference bad bad bad take week raise numerous complaints various bank channel lack notifications verification code message response whatsoever dont care customer satisfaction	Negative	1	0	0
Google Play Store	bfee9451-2938-4cfd-a756-b5622573405a	An application that needs improvements.	bander Albander	##########			0	ar	us		1	ar	application need improvements	Negative	1	0	0
Google Play Store	e9f253bb-f110-4d33-8c2a-c91f4a3ccfa1	"O Allah, grant me control over the wealth of my country and protect my money from the eyes of my family and people. Amen and with Your guidance."	lorna himolatan	##########			0	ar	us		5	ar	allah grant control wealth country protect money eye family people amen guidance	Positive	1	0	0
Google Play Store	d0cf159c-1162-4f47-bb88-3296900271ea	Ease of use	Azoz الغزواني	##########			0	ar	us		4	ar	ease use	Neutral	0	0	0
Google Play Store	650e8302-226c-43cc-bb0b-fe62928a60c3	Please provide an Arabic version if possible.	محمد صديق على ال قناوي	##########			0	ar	us		4	ar	please provide arabic version possible	Neutral	0	1	0
Google Play Store	d9747118-94bf-4cb7-964c-1a8434d41c15	Very bad sentence errors and I was expecting an update to be released sooner, but now it has been over a year with the same errors.	Hussain Alghamdi	##########			20	ar	us		1	ar	bad sentence errors expect update release sooner year errors	Negative	1	1	0
Google Play Store	dfcbe4ba-198b-4e7f-863f-01c15da3ccaa	The application doesn't work every time I try to log in. It says that the login session has expired, and actually, the application didn't even open. I called the support line but they couldn't find a solution to the problem.	صادق الاموي	##########			14	ar	us		1	ar	application doesnt work every time try log say login session expire actually application didnt even open call support line couldnt find solution problem	Negative	0	1	0
Google Play Store	0a50ab66-812c-491d-a0d1-1b73384bceec	No problem.	Gsu Vsh	##########			0	ar	us		5	ar	problem	Neutral	0	1	0
Google Play Store	c3ad4dc4-14ec-4381-b8db-af443963a259	Sorry.	Ahmed Mashal	##########			0	ar	us		5	ar	sorry	Neutral	1	0	0
Google Play Store	2f084a1f-9b4e-4da2-ac8c-7b51341dd448	Filthiest rotten dish, son of a 60 dog.	اسعد ”الجنوب“ واصلي	##########			0	ar	us		1	ar	filthy rotten dish son dog	Negative	1	0	0
Google Play Store	5d3e3a86-286f-42d0-8d0a-73816fac8468	And then, when trying to access the application or through Google, we couldn't find any correct information. It is an unreliable website, and whoever is responsible for this mess is not capable of handling it. Close it down, and those bank employees who are bothered by this situation are actually happy with it. I opened an account in another bank three days ago, and the account is working and the…	Chef Fouad Abou Elsoud	##########			0	ar	us		1	ar	try access application google couldnt find correct information unreliable website whoever responsible mess capable handle close bank employees bother situation actually happy open account another bank three days ago account work card arrive online bank extremely poor first experience bank failure highly rate	Negative	1	1	0
Google Play Store	c6e74dc1-5c54-4ef0-9262-a923e03b4a40	Every time I enter, it tells me that the login is incorrect.	AL Sayyad	##########			0	ar	us		1	ar	every time enter tell login incorrect	Negative	0	1	0
Google Play Store	39a730c6-6d3f-4590-8fec-ac4d5abcbde8	The application is excellent but there are some features missing, such as a digital card, Madad, or the ability to request an enabling card or an Enabling Plus card through the Al-Bilad application. I hope the bank can provide these features. There is no cashback on Visa cards and there are no MasterCard cards like other banks. The bank's service and branch dealings are very distinguished. The pr…	اسد مفترس	##########			3	ar	us		5	ar	application excellent feature miss digital card madad ability request enable card enable plus card albilad application hope bank provide feature cashback visa card mastercard card like bank bank service branch dealings distinguish problem lack provide service good luck albilad bank	Positive	1	1	0
Google Play Store	cceef23e-4378-463d-a4bf-9825a92c156f	I have been asking for a solution to the problem for three years, and now they are telling me to go back to the branch. Today, I went back to the branch, but the application is not opening.	Ro Hm	##########			0	ar	us		1	ar	ask solution problem three years tell go back branch today go back branch application open	Negative	0	1	0
Google Play Store	551b8bc8-3cf0-4b08-8cd7-0b1953c4270b	There is a problem with the application for three days, I have been trying to enter but it is not working.	suad alhumaid	##########			0	ar	us		1	ar	problem application three days try enter work	Negative	0	1	0
Google Play Store	eb052c62-fc95-42ac-b8b2-6888e0662439	I downloaded and tried a banking application in Saudi Arabia, and it is the worst. It keeps kicking me out every now and then and showing a notification of no connection.	n. h.	##########			0	ar	us		1	ar	download try bank application saudi arabia bad keep kick every show notification connection	Negative	1	1	0
Google Play Store	222e3f72-f79f-48f9-b978-fcac79ff0611	Excellent application	Abbas Marghni	##########			0	ar	us		5	ar	excellent application	Positive	0	0	0
Google Play Store	da965475-bcc9-44d6-9298-b3a2cc044c07	Bad application 👎 and the bank.. I haven't been able to login for two days... Not through the application nor online banking.. Screw you all	m8nd almaki	##########			2	ar	us		1	ar	bad application bank havent able login two days application online bank screw	Negative	1	1	0
Google Play Store	6b79a2f9-6de8-40ff-ab57-d98c022daa5a	An excellent application, I recommend everyone to open an account with Bank Al Bilad.	عبدالقادر النظاري	##########			0	ar	us		5	ar	excellent application recommend everyone open account bank al bilad	Positive	1	0	0
Google Play Store	30c124cb-dcb2-4994-a331-743b9abecd17	The application is worse than bad, 360 degrees.	Ahmed Aldabe	##########			0	ar	us		1	ar	application bad bad degrees	Negative	1	0	0
Google Play Store	82b2959e-6e99-4b4e-af86-03a596419347	One of the worst banks.	Ghe Yee	##########			0	ar	us		1	ar	one bad bank	Negative	1	0	0
Google Play Store	5e44d967-1cc0-4035-b6a4-8b788d8f0aaa	The password is not working, it is stuck 👎	أحمد محمد	##########			0	ar	us		1	ar	password work stick	Negative	0	1	1
Google Play Store	8334dbe7-bb6b-42c6-866b-fee5eef08cbb	Honestly, this is a very amazing, useful, and easy-to-use application. I would like to thank everyone for their tremendous efforts in the success of this.	عابد ”الصبحي“	##########			2	ar	us		5	ar	honestly amaze useful easytouse application would like thank everyone tremendous efforts success	Positive	0	0	0
Google Play Store	fc0ca73a-b8f0-431e-a5e7-732d4e260da8	I hope that the application gets fixed. 👎🏽👎🏽	ReMo ReMo	##########			0	ar	us		1	ar	hope application get fix	Negative	1	1	0
Google Play Store	7a687046-8545-4f38-9eee-3fc7f618a54f	Excellent very much	nassr ali	##########			0	ar	us		5	ar	excellent much	Positive	0	0	0
Google Play Store	a1585058-db30-473b-b777-d9f91f8871bc	Bad application, please enhance customer services.	أحمد الأحمدي (‪AHMED9770‬‏)	##########			0	ar	us		1	ar	bad application please enhance customer service	Negative	1	0	0
Google Play Store	dac11675-acb9-44fa-9a80-8125202a6e45	The app is very bad and very slow, and it doesn't deserve even a star. I can't even leave a comment!	محسن العنزي	##########			0	ar	us		1	ar	app bad slow doesnt deserve even star cant even leave comment	Negative	1	1	1
Google Play Store	57e110c5-03c7-4835-8a93-d6cb6063cb58	It doesn't open, it needs an update and development.	Saud G	##########			0	ar	us		3	ar	doesnt open need update development	Negative	0	1	0
Google Play Store	5244f6ef-d558-4813-a51c-cdb06d1565d6	Respectful employees	Ahmed Elshereef	##########			0	ar	us		5	ar	respectful employees	Neutral	0	0	0
Google Play Store	b54b97e7-828b-4bb1-9fd6-aeb17f27335a	The application is worse than bad.. Benefit from the Al Rajhi app, it is easy and secure.	abdullah abdulaziz	##########			0	ar	us		1	ar	application bad bad benefit al rajhi app easy secure	Negative	1	0	0
Google Play Store	0c192874-7d4b-4315-8eba-13995bf8b553	It is very, very bad. It has not been working for more than a year, and there is no solution.	حسن العسيري	##########			3	ar	us		1	ar	bad work year solution	Negative	1	1	0
Google Play Store	8fc5ae14-fda3-42c5-b92c-9a9f78fa2d2a	Thank you.	ماجد الربيعان	##########			0	ar	us		5	ar	thank	Positive	0	0	0
Google Play Store	f7ada69d-21da-46ab-a386-f7a9773300ab	Good	‪AHMED FREAG ALASSIRIE (Albensalla)‬‏	##########			0	ar	us		4	ar	good	Positive	0	0	0
Google Play Store	1369ac28-31ed-4d8e-9e51-c1cb909ccad8	Excellent, but it needs further development.	Abo Laith	##########			0	ar	us		5	ar	excellent need development	Positive	1	0	0
Google Play Store	bf3399ab-0c14-4967-8d07-9f96df643fc6	An excellent application.	Mostafa Salman	##########			0	ar	us		5	ar	excellent application	Positive	0	0	0
Google Play Store	0ddb73e9-1ae3-4cd2-84ce-30c0ab56729a	Excellent, splendid.	جلال الصلاحي	##########			0	ar	us		4	ar	excellent splendid	Positive	0	0	0
Google Play Store	e49409e5-ed65-4b05-bb33-71fa2f1e409e	Bad in every sense of the word.	محمود يوسف	##########			0	ar	us		1	ar	bad every sense word	Negative	1	0	0
Google Play Store	c6cd1818-4284-4c95-a5dc-8ed52f71995e	Beautiful	متفائلة جدا	##########			0	ar	us		5	ar	beautiful	Positive	0	0	0
Google Play Store	49c63fcd-9208-435d-ab3f-8abef6c6fc33	Excellent application, thank you for it.	محمد عطاالله بخيت العنزي	##########			0	ar	us		5	ar	excellent application thank	Positive	0	0	0
Google Play Store	6132a865-1797-4c9a-99d0-57840f30bcf4	The application is not working.	Mahmoud Bekr1977	##########			4	ar	us		5	ar	application work	Negative	0	1	0
Google Play Store	d62bda66-b52b-424c-8cb5-20b09ebdf19c	A very bad application that needs more improvement, check out Al Rajhi Bank's application and learn from it.	Abdullah Alabdulkarim	##########			0	ar	us		1	ar	bad application need improvement check al rajhi bank application learn	Negative	1	1	0
Google Play Store	c0b0a698-c06d-4d74-a5a2-8e187e8db91e	Good	Fatimah Albalawi	##########			0	ar	us		5	ar	good	Positive	0	0	0
Google Play Store	8e77d65d-b8c8-4cc2-8fe7-e295f9161f59	The password and code are not saved in the program.	مكتب خدمات	##########			0	ar	us		1	ar	password code save program	Neutral	0	1	0
Google Play Store	829d4c29-bce9-4102-a04c-920ddf4a79e3	Very excellent	علي مطربي	##########			0	ar	us		5	ar	excellent	Positive	0	0	0
Google Play Store	23fd630a-acd6-4cb5-9ffd-c09b86c14fc2	Excellent and easy to use.	أحمد الفيفي	##########			0	ar	us		5	ar	excellent easy use	Positive	0	0	0
Google Play Store	c0a4c743-7a3a-4285-9b87-580cfd129890	Excellent application.	سعود بن مشعل	##########			0	ar	us		5	ar	excellent application	Positive	0	0	0
Google Play Store	d681676d-6a6d-4136-ad24-28717dcb7c9e	A wonderful and effective application that stands out for its simplicity 🌹	خالد الشريعة	##########			0	ar	us		5	ar	wonderful effective application stand simplicity	Positive	0	0	0
Google Play Store	d42e9b14-dec0-4775-91b0-9af7c91000e3	The country is distinctive and has premium services.	montjatna design	##########			0	ar	us		5	ar	country distinctive premium service	Positive	1	0	0
Google Play Store	774f150d-9c1a-4cfd-9652-82508ae5fd15	An excellent bank.	Osmn Sewy	##########			0	ar	us		5	ar	excellent bank	Positive	0	0	0
Google Play Store	894ea15d-e905-4a9c-889d-9ceae143d869	Excellent experience	ضحى نجد	##########			0	ar	us		5	ar	excellent experience	Positive	0	0	0
Google Play Store	735dfd3b-1208-4eb7-8100-2e6c93afe164	Very bad application	Mohamed Ibrahim	##########			0	ar	us		1	ar	bad application	Negative	1	0	0
Google Play Store	96ecf18d-eee2-4178-8244-30354da1f4e1	Great program	علي بن فارس	##########			0	ar	us		5	ar	great program	Positive	0	0	0
Google Play Store	3ddfa5e6-6522-4188-a30e-9bf46c75967d	The worst bank with no exchange services or application. I don't know why I got involved with you. Say hello to Al Rajhi Bank for me.	عبدالله ابو ايوب الشمراني	##########			0	ar	us		1	ar	bad bank exchange service application dont know get involve say hello al rajhi bank	Negative	1	1	0
Google Play Store	5cd66634-cf88-4969-b434-f9675187c809	Excellent very much	فهد فهد	##########			0	ar	us		5	ar	excellent much	Positive	0	0	0
Google Play Store	90164b71-6f4f-4248-bdb7-90f3f7971a17	Fantastic	Abdullah Alyahya	##########			0	ar	us		5	ar	fantastic	Positive	0	0	0
Google Play Store	48ad80c7-16a5-430a-89fb-9c9fa98e81a3	Beautiful application	عبدالمحسن الغيثي	##########			0	ar	us		5	ar	beautiful application	Positive	0	0	0
Google Play Store	5db1a686-e177-480d-9663-37fad3c60096	Excellent very much	Abo Ali	##########			0	ar	us		5	ar	excellent much	Positive	0	0	0
Google Play Store	f0c5ca15-bb41-4cea-b43c-0faf17c7e93f	Very bad! I tried so hard to login but the app is dysfunctional and the bank is terrible. May Allah make me die out of frustration.	Samar Albadry	##########			0	ar	us		1	ar	bad try hard login app dysfunctional bank terrible may allah make die frustration	Negative	1	1	0
Google Play Store	e872017f-437d-4011-9f32-05c3e8f83619	Very bad....... Seriously, learn from Al Rajhi.	كيمو كيمو	##########			0	ar	us		1	ar	bad seriously learn al rajhi	Negative	1	0	0
Google Play Store	6a41622c-e681-4277-b222-4a37ed7706e4	Excellent, there is no comparison.	yahya Megdad	##########			1	ar	us		5	ar	excellent comparison	Positive	0	0	0
Google Play Store	07cd86dd-f96b-4861-b99e-6eed89d62c0c	I have been trying for two days to access the application but only advertisements on Twitter and Snapchat, and we haven't seen anything in reality.	M M	##########			0	ar	us		2	ar	try two days access application advertisements twitter snapchat havent see anything reality	Negative	0	1	0
Google Play Store	b8f76202-0ae4-4644-ab90-d4d738512b45	Unfortunately, it's very bad now. For two days, it hasn't been working. May God protect me from you, seriously.	non non	##########			0	ar	us		1	ar	unfortunately bad two days hasnt work may god protect seriously	Negative	1	1	0
Google Play Store	85c96877-8ad8-429f-b637-cb65e9d05c2f	Bad and slow.	Yaser Alghamdi	##########			0	ar	us		1	ar	bad slow	Negative	1	0	1
Google Play Store	eb255f0d-d393-4ce6-be85-ea4932122fcd	Under experiment	‪badr al_shadadi (‫البدر‬‎)‬‏	##########			0	ar	us		5	ar	experiment	Neutral	0	1	0
Google Play Store	6e114f91-86e9-4ce0-a837-787cba54e6ba	The worst banking application in the Kingdom.	علي فريد	##########			0	ar	us		5	ar	bad bank application kingdom	Negative	1	0	0
Google Play Store	0b3b92c4-b0b0-43de-b392-809ea744b32c	The application always says make sure your internet connection is working properly and the internet is working fine.	احمد الصغير	##########			3	ar	us		1	ar	application always say make sure internet connection work properly internet work fine	Positive	0	0	0
Google Play Store	4b3341f6-4905-4dcb-897a-b5d295991daa	Its capabilities are limited compared to other banking applications, such as not being able to view past months' account statements, only the current month is available.	محمد جبل	##########			0	ar	us		2	ar	capabilities limit compare bank applications able view past months account statements current month available	Negative	0	1	0
Google Play Store	2ae90aa8-bada-4ca3-a072-b2b12cf41790	Do not send the login code.	EYAD	##########			0	ar	us		1	ar	send login code	Neutral	0	1	0
Google Play Store	1887d31c-214e-4b73-aa03-af47539be6cb	He always hangs up and shuts down the program.	Yousof Ali	##########			0	ar	us		1	ar	always hang shut program	Negative	0	0	1
Google Play Store	50d2b71a-275b-4e28-95e0-4ea3983e4537	Late program in fast entry service	ابو ماجد	##########			0	ar	us		1	ar	late program fast entry service	Neutral	0	1	0
Google Play Store	351d5e12-cdbf-4ce4-946c-20298cff1b79	The transactions are smooth and excellent.	mubarak salih	##########			0	ar	us		5	ar	transactions smooth excellent	Positive	0	0	0
Google Play Store	87b5630a-7f3e-4775-8841-21b623389295	Brother, instead of sending a number to activate a complicated customer, why don't you do it like Al Rajhi Bank? Just press a number to activate. I activate the customer and I am in Yemen. Your application takes the balance and does not accept to activate the customer, especially in the Easy Net service.	سالم عبدالله سالم بامعس	##########			0	ar	us		5	ar	brother instead send number activate complicate customer dont like al rajhi bank press number activate activate customer yemen application take balance accept activate customer especially easy net service	Negative	1	1	0
Google Play Store	b1caea8b-830a-4e99-87e5-ad0a44c8c699	The application is not working, it says there is no connection when there actually is. I need to delete and reinstall it for it to work once, but then the same issue appears and a note saying there is no connection.	mm aa	##########			0	ar	us		1	ar	application work say connection actually need delete reinstall work issue appear note say connection	Negative	0	1	0
Google Play Store	e795b950-165d-42e2-92f3-81a249ceb47f	Its value is 5 stars by mistake, it does not deserve even a single star. The application does not work and is the worst bank.	Kh Kh	##########			0	ar	us		1	ar	value star mistake deserve even single star application work bad bank	Negative	1	1	0
Google Play Store	e011d599-b2ee-4eda-9389-05a9b5956bde	The application won't open for me, it says "Please contact the bank".	شامخ القيسي	##########			0	ar	us		3	ar	application wont open say please contact bank	Negative	0	1	0
Google Play Store	5d21ebc2-ff82-4e56-a4db-c8492c1c8de5	I'm trying to access the application, but it's not working. What seems to be the problem?	عبدالله الماحى	##########			0	ar	us		1	ar	im try access application work seem problem	Negative	0	1	0
Google Play Store	9f9519fd-ab38-42ed-befe-3c466f75061d	More than wonderful	هيثم العامري	##########			0	ar	us		5	ar	wonderful	Positive	0	0	0
Google Play Store	7ef367b3-f626-42d5-bbca-054611dc6d74	I hope the bank learns from other banks and improves its program.	Ammar H	##########			0	ar	us		1	ar	hope bank learn bank improve program	Neutral	1	0	0
Google Play Store	e1020a44-19c5-4b8d-998d-c69212bcbc84	dsds	HAETIAHM ALHEARBE	##########			0	ar	us		5	ar	dsds	Neutral	1	0	0
Google Play Store	3309bf07-356f-40d1-bfda-de7784339b7d	A very bad application, it has been hanging for a few days, I don't know what its problem is.	Abdurahman Albalawi	##########			0	ar	us		1	ar	bad application hang days dont know problem	Negative	1	0	1
Google Play Store	c38354b8-32e0-4027-8fc0-445734468448	Top quality and advanced technology at work.	Abumahmoud Samer	##########			1	ar	us		5	ar	top quality advance technology work	Positive	0	0	0
Google Play Store	29f883c1-49b4-41bc-ba45-847a436d2851	The system tells me that there is a virus.	Abd Al Razzaq	##########			0	ar	us		2	ar	system tell virus	Negative	1	1	0
Google Play Store	11a4d492-901b-4f2c-a2f7-ba8f0638d620	This Arabic text translates to: "nice, Mashallah."	ابو ابو	##########			0	ar	us		5	ar	arabic text translate nice mashallah	Positive	0	1	0
Google Play Store	d154dd9e-2c83-4a9d-9091-c629b14f028b	Please, we kindly request the program administrators to communicate quickly. When downloading the program, there is a security threat due to the presence of Trojan burn files, which prevents us from being able to download the application.	diaa abdelfatah	##########			2	ar	us		1	ar	please kindly request program administrators communicate quickly download program security threat due presence trojan burn file prevent us able download application	Negative	0	1	0
Google Play Store	fc445e26-1ade-452d-aa6c-8d002fe4afde	And then, I mean, for three days I've been trying to log in from the application and it tells me the information is incorrect. I even changed the password and still couldn't log in. I tried calling the number listed on Google Maps, and it showed me that it was a suspicious call!!!!!!!	وفاء السويركي	##########			61	ar	us		1	ar	mean three days ive try log application tell information incorrect even change password still couldnt log try call number list google map show suspicious call	Negative	0	1	0
Google Play Store	9c497d36-56a5-4d8a-b0f8-836f871bc329	done	HARON SAFI SAFI	##########			0	ar	us		5	ar	do	Positive	0	1	0
Google Play Store	39138cf3-add7-4d8c-81c2-48449a322087	Excellent application	موسى البلوشي	##########			0	ar	us		5	ar	excellent application	Positive	0	0	0
Google Play Store	5cb2b9f5-9a3a-424b-9466-977993440105	Excellent and highly recommended.	Abdullah Abdo	##########			0	ar	us		5	ar	excellent highly recommend	Positive	0	0	0
Google Play Store	8d9ed981-e86f-4520-bcf6-0509e315277b	Good.	Al mansour Saleh	##########			0	ar	us		5	ar	good	Positive	0	0	0
Google Play Store	887ec6b6-f5f6-4134-9eb8-b1c33a03e882	The worst ATM application I have ever used. I entered from the website normally with the same data, but when I tried to log in from the application it says the login credentials are incorrect. Very strange indeed.	3bdo saleh	##########			38	ar	us		1	ar	bad atm application ever use enter website normally data try log application say login credentials incorrect strange indeed	Negative	1	1	0
Google Play Store	abbb3824-5f41-462a-b787-15036c68ba78	Very very very very very very bad. No matter what I say, I won't be able to describe how terrible the application is. It's the worst from the start. I tried not to go with the comments and give it a chance. I tried it multiple times, repeated it over and over again, but it's useless. The application is the worst in every sense of the word. I swear, it's been years since I've written a comment on …	Rooa No	##########			1	ar	us		1	ar	bad matter say wont able describe terrible application bad start try go comment give chance try multiple time repeat useless application bad every sense word swear years since ive write comment program force write bad enter information correct matter many time repeat add application completely reject bad could wouldnt even give single star	Negative	1	1	0
Google Play Store	550fa540-a5bd-41ff-8810-e00af7a2a9e0	Excellent	Hafiz Alhassan	##########			0	ar	us		5	ar	excellent	Positive	0	0	0
Google Play Store	4e504313-bb04-4760-9692-47038a61b3b9	Does not match with Android devices.	احمد الصبحي	##########			0	ar	us		1	ar	match android devices	Negative	0	0	0
Google Play Store	7560469b-6910-4ca3-a386-ff0f06bee966	A primitive application, unfortunately, I transferred my account to Al Rajhi Bank and what a failed change. Failure still persists with you, you backward people. HAHAHAHA And the application is still unsuccessful, fearing the expenditure of money to develop the program..........0	just Darkness days	##########			2	ar	us		1	ar	primitive application unfortunately transfer account al rajhi bank fail change failure still persist backward people hahahaha application still unsuccessful fear expenditure money develop program	Negative	1	1	0
Google Play Store	ca23e614-914d-4480-97a9-a0bf50216ab2	Transfers are delayed a lot, by God. I have 3 transfers since 1/10/2022, and I have all the transfer details. I contacted them, and they said it takes from 3 days to 5 days to resolve. And I swear to God, other banks don't need more than two hours.	ياسين سليم	##########			0	ar	us		1	ar	transfer delay lot god transfer since transfer detail contact say take days days resolve swear god bank dont need two hours	Negative	0	0	1
Google Play Store	64765212-fa42-484b-903b-3edc9bfb0fd0	Excellent very	ابراهيم مبروك	##########			0	ar	us		5	ar	excellent	Positive	0	0	0
Google Play Store	1de9985f-0df9-4c63-aaa1-562852a7fbb9	The application is not working.	فهد العولقي	##########			0	ar	us		1	ar	application work	Negative	0	1	0
Google Play Store	9451b7b3-417e-40a2-9a06-2e037cb8ee97	Very bad, impractical, and comes out automatically.	Bandar ALsnani	##########			0	ar	us		1	ar	bad impractical come automatically	Negative	1	1	0
Google Play Store	c8b93d86-0477-41f2-bb69-758e84107dd2	Excellent	ابو انور	##########			0	ar	us		5	ar	excellent	Positive	0	0	0
Google Play Store	168e6c10-0c9c-4677-bbf8-a6cc66328629	"Just a star for participation. The worst application and the worst experience for me. For 20 days, I have been trying to issue an employee card, but it says the device is malfunctioning. The self-service asks for the card number or account, then the process fails. Your card is terminated. I am aware that it is expired, and I am coming to renew it."	NADA THE QWEEN	##########			0	ar	us		1	ar	star participation bad application bad experience days try issue employee card say device malfunction selfservice ask card number account process fail card terminate aware expire come renew	Negative	1	1	0
Google Play Store	f22cb7bc-385d-45e8-83c1-aaf1a6a14047	Very difficult to search for transfers and the method of issuing receipts and there is no PDF receipt.	Hyg H	##########			0	ar	us		1	ar	difficult search transfer method issue receipt pdf receipt	Negative	1	1	0
Google Play Store	5c9fe765-0b0a-40a7-8c47-e8961d034540	The application has become bad.	habiba abdo	##########			0	ar	us		1	ar	application become bad	Negative	1	0	0
Google Play Store	3eaf0fab-e3d3-4373-9a06-11ea5ae2b047	Excellent and very fast, and all the services are available.	Abdullah Ali	##########			0	ar	us		5	ar	excellent fast service available	Positive	0	0	0
Google Play Store	248d701b-dd2b-4d31-ba48-c1fb2cb8f9e4	Excellent very much	وديع البدوي	##########			0	ar	us		5	ar	excellent much	Positive	0	0	0
Google Play Store	785df90e-0af8-49fc-ae55-8b1828c926ed	Very good.	adam abdalrasol	##########			0	ar	us		4	ar	good	Positive	0	0	0
Google Play Store	372e9e3a-58fb-4265-b9c0-9112d59e713b	With the people	احمد العبادي	##########			0	ar	us		1	ar	people	Neutral	0	1	0
Google Play Store	7f690e29-bed2-4512-8335-cac22939e554	Excellent very much	الحوت مات	##########			0	ar	us		5	ar	excellent much	Positive	0	0	0
Google Play Store	bb498ddc-1473-43f3-b04a-354366d57dd1	Excellent	متعب المطيري	##########			0	ar	us		5	ar	excellent	Positive	0	0	0
Google Play Store	b3f85ebe-7ce1-4643-8cb0-5e3567413e25	Very bad and unsuccessful, not even worth a single star. It has been an hour and it refuses to register even though all the required information is correct. The application always freezes and I regret downloading it. I will delete it now.	Abdulaziz Mohamed	##########			32	ar	us		1	ar	bad unsuccessful even worth single star hour refuse register even though require information correct application always freeze regret download delete	Negative	1	1	1
Google Play Store	689fe86e-1642-467d-8626-e63938a8bdae	The application is very strange. When I try to create an account, it tells me that the account already exists, but when I try to log in, it tells me that there is no account. The programmer messed up.	ابراهيم العلوي	##########			10	ar	us		1	ar	application strange try create account tell account already exist try log tell account programmer mess	Negative	1	1	0
Google Play Store	2dd48c4a-6a10-45dc-ae9a-ae8d8c02dc3f	Excellent application, and a better bank than others.	يوتيوب	##########			1	ar	us		5	ar	excellent application good bank others	Positive	0	0	0
Google Play Store	7d6bd64a-ae3c-4332-a219-ba4626471238	The application is very bad, it refuses to login, and the website has been hanging for a week. AlBilad Bank's services are the worst. God willing, soon my account will be closed due to the lack of respect towards the customer.	Ahmad Taher	##########			1	ar	us		1	ar	application bad refuse login website hang week albilad bank service bad god will soon account close due lack respect towards customer	Negative	1	1	1
Google Play Store	1d894bc4-47ae-40a6-9dde-7150200a960f	The application used to be good, but unfortunately, with the new update, it keeps crashing on the device and it asks for the ATM card PIN, even though I have been using the device and application for over two years. Unfortunately, all banking applications have become bad after the update. The update should make the application better, not worse... but it turned out worse.	د.غادة سيد	##########			12	ar	us		1	ar	application use good unfortunately new update keep crash device ask atm card pin even though use device application two years unfortunately bank applications become bad update update make application good bad turn bad	Negative	1	1	1
Google Play Store	eea56ee9-37c5-477d-bf9e-4dca93b3b107	Excellent application	77 amirkas	##########			0	ar	us		4	ar	excellent application	Positive	0	0	0
Google Play Store	e6ad7875-1813-4ad6-baa5-8969d3494d1a	The latest update of the app has made it impossible for me to access it anymore.	ali alghanim	##########			1	ar	us		1	ar	late update app make impossible access anymore	Negative	0	1	0
Google Play Store	4d953ec0-cd06-41d8-a047-cd625f460d12	Glory be to Allah, the Mighty.	جمال وعسل النحل البري	##########			0	ar	us		5	ar	glory allah mighty	Positive	0	0	0
Google Play Store	165322f6-6c5e-4591-81ac-fdd392dc1616	Very bad. Every time I register, an error appears and all the entered data is correct.	زيد عبدة نوري	##########			0	ar	us		1	ar	bad every time register error appear enter data correct	Negative	1	1	0
Google Play Store	fbafde67-14fa-4060-ac54-7fd9b061c281	There are some difficulties in it, but it is enjoyable.	mmd Bafayad	##########			0	ar	us		5	ar	difficulties enjoyable	Positive	1	0	0
Google Play Store	628a2774-f7e6-4305-9972-40d9e7f3e7ef	Al-Bilad Bank deserves all the appreciation and respect for its good work and credibility.	صالح هدنه صالح هدنه	##########			0	ar	us		5	ar	albilad bank deserve appreciation respect good work credibility	Positive	0	0	0
Google Play Store	018f4686-4c82-44ce-b143-abd5287144bd	Please enter your residency ID number, mobile number, date of birth, and three hours of the white screen and nothing.	يوسف الدميني	##########			0	ar	us		1	ar	please enter residency id number mobile number date birth three hours white screen nothing	Neutral	0	1	0
Google Play Store	60e521af-93c2-4edb-8f14-528dab64f179	Banque Al-Balad is distinguished.	ahmad almalki	##########			0	ar	us		5	ar	banque albalad distinguish	Neutral	1	0	0
Google Play Store	7fced336-ebbf-4c90-9686-71ca161f3755	The application is very, very good.	Sadig Ali	##########			0	ar	us		5	ar	application good	Positive	0	0	0
Google Play Store	155dc3aa-7d5b-45d7-804f-a3b72ccd8eb5	Sometimes, it hangs.	muteb aziz	##########			0	ar	us		3	ar	sometimes hang	Neutral	0	0	1
Google Play Store	2363ecaa-2d3f-41f3-b6db-59c946d54b32	Fantastik	Rasta Man	##########			0	ar	us		5	ar	fantastik	Positive	0	0	0
Google Play Store	470840e2-71d3-4bb0-8955-6197a3f53aa3	This is a very bad application, if there were less than one star, I would have given it.	ابو سعيد	##########			0	ar	us		1	ar	bad application less one star would give	Negative	1	0	0
Google Play Store	6d55cc3c-9eb2-481d-b6cd-07d462d32d86	I am in a state of astonishment. I swear, I closed my account in another bank and relied on Al-Bilad Bank. I opened it on September 5th and today is September 8th, and it tells me there is an error or the referred code already exists or there is an error in the password. I can't believe a bank failed to update its application! What should I do now? Should I close the account? The application is s…	Soso Dr	2022-09-08 05:30:00			0	ar	us		1	ar	state astonishment swear close account another bank rely albilad bank open september th today september th tell error refer code already exist error password cant believe bank fail update application close account application suppose facilitate transactions like bank pay send money transfer	Negative	0	1	0
Google Play Store	f2f27e6c-b1a6-423e-9f5d-001b03a0bd41	The application is very bad, every time I enter the password and username it gives me an error. What is the problem?	mohamed alshareef	##########			12	ar	us		1	ar	application bad every time enter password username give error problem	Negative	1	1	0
Google Play Store	d5492d73-e0b8-46a0-ac68-df3809c5843b	He deserves a million stars 🥰🥰🥰🥰🥰❤️❤️🇸🇦🇸🇦🇸🇦.	Ww Bh	##########			0	ar	us		5	ar	deserve million star	Positive	1	0	0
Google Play Store	0a05fc3e-a7ac-4fc3-9017-952040793625	Very, very excellent. I am impressed with your services and your nice dealing. I wish you further progress and I extend my thanks to the staff of this beautiful institution capable of providing services in the best, most beautiful, and most sophisticated ways.	عمر عبدالله	##########			6	ar	us		5	ar	excellent impress service nice deal wish progress extend thank staff beautiful institution capable provide service best beautiful sophisticate ways	Positive	1	0	0
Google Play Store	2b74d644-6359-4ffa-a720-532ab030faf3	It confused me... it doesn't accept entry even though I have taken all the steps.	‪al-general (Al-nosiri)‬‏	2022-09-05 06:48:00			0	ar	us		1	ar	confuse doesnt accept entry even though take step	Negative	0	1	0
Google Play Store	32540d32-fa75-4178-916a-29b97f0f3544	Very good height	علي لافي الحسيكي الحارثي	2022-09-03 07:20:00			0	ar	us		4	ar	good height	Positive	0	0	0
Google Play Store	15693514-0b1c-4a70-a4be-21c9a2a78815	The application is very slow, even though everything is correct, the application doesn't work for me. We kindly request Banque Al Bilad to solve the application's problem.	خالد	##########			1	ar	us		1	ar	application slow even though everything correct application doesnt work kindly request banque al bilad solve applications problem	Negative	0	1	1
Google Play Store	e44e7751-1c4b-4b1f-a0e7-adceec7968be	The application is bad and registration on it is very difficult. I hope you improve it in a better and easier way.	Agoob Alk	2022-09-02 00:13:00			11	ar	us		1	ar	application bad registration difficult hope improve good easy way	Negative	1	0	0
Google Play Store	ac7221c9-a821-42b9-81fb-e76152df2be8	The application is not working. It says the username or password is incorrect or the account has been deactivated.	عبدالغني محمد	##########			3	ar	us		1	ar	application work say username password incorrect account deactivate	Negative	0	1	0
Google Play Store	1a627e00-28bc-4a89-8554-37fc141b23cf	Very, very, very, very, very, very, very excellent.	خالد الحربي	##########			0	ar	us		5	ar	excellent	Positive	0	0	0
Google Play Store	0d4547c9-823e-4ce6-81e2-629fbd0acadc	Good	فهد التنم	2022-09-01 09:00:00			0	ar	us		5	ar	good	Positive	0	0	0
Google Play Store	e962cc1b-850f-4a38-8198-60b3ab24f8a2	Thank you for the services.	يوسف علي	2022-09-01 03:10:00			0	ar	us		5	ar	thank service	Positive	0	0	0
Google Play Store	89f1c2ae-b4e5-4939-81bb-b13ba3e409f1	Wow! 👏👏👏👍👍❤️	ERHJ MJ	##########			0	ar	us		5	ar	wow	Positive	0	0	0
Google Play Store	86054702-7ad1-424e-b922-ff519c320a09	"Why does it disconnect when I return to the application?"	عبدالله الحبيش	##########			0	ar	us		1	ar	disconnect return application	Neutral	1	1	0
Google Play Store	56477471-77e5-4329-acb3-473371566396	If there is less than one person, I would give them a very, very bad application.	ننوش ننوش	##########			1	ar	us		1	ar	less one person would give bad application	Negative	1	0	0
Google Play Store	4df5356e-e26d-4825-a5b0-07f0b7802c01	Good	ابو تيم	##########			0	ar	us		3	ar	good	Positive	0	0	0
Google Play Store	ec129397-16c1-419b-9d3f-a53e65890447	Excellent	عصمان السودان	##########			0	ar	us		5	ar	excellent	Positive	0	0	0
Google Play Store	327ec104-df2c-425e-9401-8e32d6e4abf7	In addition to it, a star.	maen aljabi	##########			1	ar	us		1	ar	addition star	Positive	1	0	0
Google Play Store	efabb1dd-d309-4536-917d-d85391f2d35c	The application is not working... It says please try to connect to the internet.	Nldal Abudagga	##########			2	ar	us		1	ar	application work say please try connect internet	Negative	0	1	0
Google Play Store	b6f86523-6921-4205-adf7-5d34e861726f	Good.	ابو فراس حمد	##########			1	ar	us		2	ar	good	Positive	0	0	0
Google Play Store	b36eba7b-8598-47a0-b91d-88a1bf77ea98	The application has a problem and does not accept login. The error message says "Invalid user" even though my data is correct, and I am able to login from the browser. It's strange that a bank is unable to program an application.	ghadna ahmed	##########			28	ar	us		1	ar	application problem accept login error message say invalid user even though data correct able login browser strange bank unable program application	Negative	0	1	0
Google Play Store	2a825320-97f4-41ac-8fb3-dd8ae7bd9153	The best banking and service experience on a wide scale, and better than any other service. Convenient and innovative digital banking service with unlimited possibilities. Bank Albilad has no equals for outstanding and lucky individuals.	Ahmed Slsidik	##########			0	ar	us		5	ar	best bank service experience wide scale good service convenient innovative digital bank service unlimited possibilities bank albilad equal outstanding lucky individuals	Positive	0	0	0
Google Play Store	260b69d7-4c0e-40b0-992c-c83f6c1f02b3	Unfortunately, the login process is manual. I hope to benefit from the Al Jazeera Bank application.	ماجد الصالح	##########			1	ar	us		1	ar	unfortunately login process manual hope benefit al jazeera bank application	Neutral	0	1	0
Google Play Store	21aa7704-65f2-4286-b30c-736360962ae8	Why doesn't the program open and it keeps saying that the password is incorrect? I even tried creating a new password, but it still says it's wrong. It's really a shame that the bank's reputation is being ruined because of this application. I need to check my balance or make a transfer or any other task, and I have to go to an ATM! This is unbelievable! Why isn't it like other banks' applications…	Me__3 3	##########			2	ar	us		1	ar	doesnt program open keep say password incorrect even try create new password still say wrong really shame bank reputation ruin application need check balance make transfer task go atm unbelievable isnt like bank applications provide excellent service need find solution problem soon possible even release update problem didnt get resolve whats use update really	Negative	1	1	0
Google Play Store	5864d564-03f3-4ef6-a064-047ae4cf15c7	Very very bad	Mn	##########			1	ar	us		1	ar	bad	Negative	1	0	0
Google Play Store	ce7af051-ba95-4ed3-b26d-f776010f126e	The application does not work on Redmi mobile phones.	Mohamad	##########			0	ar	us		2	ar	application work redmi mobile phone	Negative	0	1	0
Google Play Store	f500b02f-429c-41f0-b241-78e98cdc71df	Very wonderful	محمود بشابشة	##########			0	ar	us		5	ar	wonderful	Positive	0	0	0
Google Play Store	21a325d5-544c-4ae5-899a-570785960cf0	From the bank's perspective, it's great, but the application is not working. We kindly request the management to find a quick solution to the problem.	صادق الصديق	##########			12	ar	us		5	ar	bank perspective great application work kindly request management find quick solution problem	Negative	1	1	0
Google Play Store	4faa2002-5b02-4153-bfee-3865a6db9671	I wish that the program's design could be developed as if we were in the year 2012.	Meshary	##########			2	ar	us		3	ar	wish program design could develop year	Neutral	1	0	0
Google Play Store	3f8d3f22-72c3-4e45-9797-13c057a66d82	Failure, I wish the bank would take care of its application.	حمد بوسبيت	##########			1	ar	us		1	ar	failure wish bank would take care application	Negative	1	0	0
Google Play Store	585ec8ed-5c35-4c79-956d-b08b39ffd911	Very bad. When logging in, it gives you incorrect data despite its accuracy. For about a year, I couldn't access my account despite visiting the branch several times and contacting Riyadh, but it was unsuccessful. After about a year, the problem was finally resolved.	hod abdallah	##########			4	ar	us		1	ar	bad log give incorrect data despite accuracy year couldnt access account despite visit branch several time contact riyadh unsuccessful year problem finally resolve	Negative	1	1	0
Google Play Store	eab2e087-bb52-4bc7-bb56-7a51da63baa2	The application is a failure. I wish they would release a new application better than it. They should learn a bit from Al Rajhi.	عبدالرحمن بن سواد	##########			2	ar	us		1	ar	application failure wish would release new application good learn bite al rajhi	Negative	1	1	0
Google Play Store	68b1a4cb-8c35-4141-ae3b-7389f754118b	Excellent	فهد القحطاني	##########			0	ar	us		5	ar	excellent	Positive	0	0	0
Google Play Store	110549a5-1207-4c3d-9cb2-9ab2e1369305	Very good	محمود الحازمي	##########			0	ar	us		5	ar	good	Positive	0	0	0
Google Play Store	6d922fb3-66b3-4263-b77c-6e323fa35673	Beautiful	محمد بخيت	##########			0	ar	us		4	ar	beautiful	Positive	0	0	0
Google Play Store	a71822d3-a101-4f2c-9eaa-4d5024727589	I have tried it before and it was delicious ... and now it is under testing.	Abo Omer	2022-08-08 06:42:00			0	ar	us		5	ar	try delicious test	Positive	1	0	0
Google Play Store	d3da6174-1e0c-47b4-96f8-866e2c2b1a10	Sometimes the program crashes, so we hope to solve this problem.	Faisal Sudan	##########			0	ar	us		5	ar	sometimes program crash hope solve problem	Negative	0	1	0
Google Play Store	0341e48d-b0f6-4446-b817-b7d8cea64458	I had a problem logging in to the application, like the rest of the comments, and I contacted customer service through Twitter. The issue was immediately resolved within minutes!	Mahmoud ABDELWAHED	##########			0	ar	us		5	ar	problem log application like rest comment contact customer service twitter issue immediately resolve within minutes	Neutral	0	1	0
Google Play Store	29d96b86-4014-4ded-ba3e-c0f9c06f5602	A very bad application falsely claims that I entered the password incorrectly multiple times and locks my account, even though I have never entered it incorrectly.	khalid om	##########			2	ar	us		1	ar	bad application falsely claim enter password incorrectly multiple time lock account even though never enter incorrectly	Negative	1	1	0
Google Play Store	399cd93b-d5bf-464a-a43d-6f0327ad353e	Excellent application, the only downside in personal finance is that it reaches the final stage and gets stuck, while the remaining services are excellent.	S Sa	##########			0	ar	us		5	ar	excellent application downside personal finance reach final stage get stick remain service excellent	Positive	1	0	1
Google Play Store	7e54f9a8-d961-4550-a985-bf481bce6e1b	An excellent, easy, and simple program. Basically, Bank Al Bilad is comfortable with it.	Ehab Mohamed	2022-08-03 02:48:00			1	ar	us		5	ar	excellent easy simple program basically bank al bilad comfortable	Positive	0	0	0
Google Play Store	239a97e4-c7e8-409f-9b8e-78dc0f6a9841	Weak application	Ali Ali9987	##########			1	ar	us		1	ar	weak application	Negative	1	0	0
Google Play Store	94cd9239-3534-481e-a00b-7716298823fa	The application is bad, it does not open despite the data being correct.	عمران البشير	##########			1	ar	us		1	ar	application bad open despite data correct	Negative	1	1	0
Google Play Store	af432e45-5401-47d8-bde6-d7e6e96106a0	The worst and most unsuccessful application, very primitive and with many glitches. Its fast transfer service has not been working for a week. Improve your application or delete it, as it is of no use.	عمر العتيبي	2022-08-01 02:39:00			1	ar	us		1	ar	bad unsuccessful application primitive many glitches fast transfer service work week improve application delete use	Negative	1	1	1
Google Play Store	47f9cd77-ad0e-4d37-9ed1-62afb1ca100e	I want to access, but it says "not connected to the internet, application failure."	استغفرالله العظيم	##########			1	ar	us		1	ar	want access say connect internet application failure	Negative	0	1	0
Google Play Store	9cb26f64-fef2-4931-9051-379504f0ecb0	Why did you make it English when it was originally in Arabic?	فايز الظفيري	##########			0	ar	us		1	ar	make english originally arabic	Neutral	1	0	0
Google Play Store	ac11a847-14b9-427b-802b-03a7edde250c	I don't know.	fimmas ابوالتكاسي	##########			0	ar	us		2	ar	dont know	Neutral	1	0	0
Google Play Store	9dd08bb2-6239-4381-a872-e3304fe11e16	Bad	عبدالناصر ابوصفاء ومها	##########			2	ar	us		1	ar	bad	Neutral	1	0	0
Google Play Store	58eeaba7-278a-40fb-a915-3ee06bda40e3	Excellent, especially when it comes to transfers through Western Union.	Ahmad Balkhair	##########			0	ar	us		5	ar	excellent especially come transfer western union	Positive	1	0	0
Google Play Store	3882fd33-3208-434a-9b1f-f8ad26384de6	Every update doesn't open, so it's useless like this.	Ahmad Soliman	##########			2	ar	us		1	ar	every update doesnt open useless like	Negative	1	1	0
Google Play Store	c3f6422e-0516-4bae-84a4-9b035c46ffba	I am not receiving a message with the verification code? I am unable to open the application!	فيء .ع	##########			38	ar	us		1	ar	receive message verification code unable open application	Negative	0	1	0
Google Play Store	c152f463-fc6a-4bdf-8001-403113b2c473	Since yesterday, I've been trying to access the account but I can't. Please close the account.	تركي عبده	##########			1	ar	us		1	ar	since yesterday ive try access account cant please close account	Negative	0	1	0
Google Play Store	56d82ee4-36a7-4784-96cb-328a9a935191	The program does not work outside of the kingdom. (Warning)	Mohammed Amin	##########			12	ar	us		1	ar	program work outside kingdom warn	Neutral	1	1	0
Google Play Store	bdfa2e5f-4ab3-4e4f-a27f-5576169ab0d8	Opening an account through the application is difficult.	Bashar Alhamzah	##########			1	ar	us		1	ar	open account application difficult	Negative	1	0	0
Google Play Store	8bd5b302-0072-424f-bbbb-9f7dc5d9acee	Excellent very much	Qwerrt	##########			0	ar	us		5	ar	excellent much	Positive	0	0	0
Google Play Store	2956fe55-138e-48fe-9750-85af46724c40	Please fix the program honestly. The program is slow and full of errors. I cannot create an account, recover information, or log in.	مهند	##########			1	ar	us		1	ar	please fix program honestly program slow full errors create account recover information log	Negative	0	1	1
Google Play Store	e96a2cc2-1ffa-4e7c-a2d8-fb6a39d48924	You will wear a shroud longer than the earth and a fatal accident longer than the sky.	Shhejei Xjjddj	##########			0	ar	us		5	ar	wear shroud long earth fatal accident long sky	Negative	0	1	1
Google Play Store	883c1510-af9a-4433-b94e-e5917a4f82a2	nice	نسيم نسيم	##########			0	ar	us		5	ar	nice	Positive	0	0	0
Google Play Store	127b752b-8062-4973-9876-7a1aedbe56b5	Failure	بدر الشراري	##########			1	ar	us		1	ar	failure	Negative	0	1	0
Google Play Store	577e552e-e965-4546-8b11-2bf9db317d26	The application is bad, it doesn't open, and there is no solution until now.	Salah Ss	##########			1	ar	us		1	ar	application bad doesnt open solution	Negative	1	1	0
Google Play Store	d106dda3-e1ac-47c3-a4e3-b6aba41b1240	the worst application, its quality is nonexistent.	محمد البقمي	##########			1	ar	us		1	ar	bad application quality nonexistent	Negative	1	0	0
Google Play Store	9099e2a8-b08d-4372-b854-09d83b7f03e2	The app is very bad, and upon logging in it says the password is incorrect. Where is the support to find a solution to this problem? It has been more than five months and it hasn't been resolved. I can't access the app.	بسام الخالدي	##########			37	ar	us		1	ar	app bad upon log say password incorrect support find solution problem five months hasnt resolve cant access app	Negative	1	1	0
Google Play Store	914b3be7-4824-4d5f-9c11-bf68a1d47961	I don't know why the app developer is not responding to customer comments. Please, the app developer should choose a better interface for the app than this one.	محمد إبراهيم محمد	##########			11	ar	us		1	ar	dont know app developer respond customer comment please app developer choose good interface app one	Negative	1	0	0
Google Play Store	fa2492d2-7b2c-4f30-b59c-73ff71520011	Your application is a failure. The most important thing for me is to log in to carry out my transactions. Every time I try to log in, it says it has been closed due to incorrect login attempts, but I assure you that I log in correctly. Your application is the worst. I gave it a star so that I could leave a review.	Aisha Alharbi	##########			1	ar	us		1	ar	application failure important thing log carry transactions every time try log say close due incorrect login attempt assure log correctly application bad give star could leave review	Negative	1	1	0
Google Play Store	eed75f59-3564-40d9-a6af-32e13e670ae5	Excellent and it relaxes me a lot.	وائل الغامدي	##########			0	ar	us		5	ar	excellent relax lot	Positive	0	0	0
Google Play Store	b72ab2df-e700-41b4-b78a-048e488c7753	It doesn't work. It's rubbish.	rafat timsah	##########			1	ar	us		1	ar	doesnt work rubbish	Negative	1	1	0
Google Play Store	bd3a995f-5b73-4ec3-9768-c5c91074522b	Very excellent / Great	عبدالله بن عبدالعزيز	##########			0	ar	us		5	ar	excellent great	Positive	0	0	0
Google Play Store	855f3b78-74bb-41f6-a5ba-b9d45472d6b3	Peace be upon you. Recently, whenever I tried to log in, it gives me a message saying there is no internet connection, despite the internet being properly set up.	ham ham	##########			1	ar	us		1	ar	peace upon recently whenever try log give message say internet connection despite internet properly set	Negative	1	0	0
Google Play Store	82e89cd4-3120-4863-b412-d66dc38606bd	nice and beautiful, very wonderful.	مشاري سعد علي القحطاني آل سعد1	##########			0	ar	us		5	ar	nice beautiful wonderful	Positive	0	0	0
Google Play Store	e1b7adae-0e7d-4070-b20d-3a450ed84322	After the latest update, it gives me an error message saying "Please check your username and password" 😭	abu rwaf	##########			1	ar	us		1	ar	late update give error message say please check username password	Negative	0	1	0
Google Play Store	79958e81-362e-4e28-a207-f233c5137f90	A the worst application, you cannot access your account due to an error in the username or password, despite the accuracy of the data. Unfortunately, the bank has been abandoned completely and there is no regret for it.	bastos sd	##########			20	ar	us		1	ar	bad application access account due error username password despite accuracy data unfortunately bank abandon completely regret	Negative	1	1	0
Google Play Store	4f023586-10b7-48d9-b605-71b2a63fd263	Comfortable and excellent	Ahmed Sulieman	##########			0	ar	us		5	ar	comfortable excellent	Positive	0	0	0
Google Play Store	fe6ffefa-42fb-4fcd-b913-5b78d215201a	Excellent	mahy saeed	##########			0	ar	us		5	ar	excellent	Positive	0	0	0
Google Play Store	199df1d3-19bf-4300-bba9-75632dedd898	Sorry	حموده العربي	2022-07-09 09:54:00			0	ar	us		5	ar	sorry	Negative	1	0	0
Google Play Store	1b50bb28-ad04-4a34-98f2-72e248ee533d	Good.	محمد ملهي	##########			0	ar	us		5	ar	good	Positive	0	0	0
Google Play Store	aa5c7615-50eb-41a7-aec0-63a77eb2bd24	Good.	Alit Jgg	##########			0	ar	us		5	ar	good	Positive	0	0	0
Google Play Store	de06e58a-b940-4edb-9b52-9f8cfd968717	Its flaws are many.	محمد الشريف	##########			1	ar	us		2	ar	flaw many	Negative	1	0	0
Google Play Store	7cd29aec-b0a9-45a3-af21-eb8d202ce499	Excellent and easy.	حسن مختار	##########			0	ar	us		5	ar	excellent easy	Positive	0	0	0
Google Play Store	6d0a86e8-8735-400b-b668-8cf5454fb5b8	My account has been deactivated without my knowledge or even being notified about it.	اديب الوجية	2022-07-06 03:11:00			1	ar	us		1	ar	account deactivate without knowledge even notify	Negative	0	1	0
Google Play Store	f7560951-21ee-4d5f-8992-a5932f9a0a73	Excellent	لطوف لطوف	##########			0	ar	us		5	ar	excellent	Positive	0	0	0
Google Play Store	fd5a833d-dfad-4408-8e69-90dbe8511fa1	Easy	Apo kardai	##########			0	ar	us		5	ar	easy	Positive	0	0	0
Google Play Store	a080e4cb-f23d-4a46-942c-9b86d88129c1	I opened an online account and went to the bank to collect it. They said it hasn't arrived yet, and it has been ten days and it still hasn't arrived. So, how can I collect it?	159M4	##########			0	ar	us		3	ar	open online account go bank collect say hasnt arrive yet ten days still hasnt arrive collect	Negative	0	1	0
Google Play Store	a4357974-ae06-4509-955b-c11380856f6a	Why has a messaging center not been added to the application?	Hassan Badwey	##########			1	ar	us		1	ar	message center add application	Neutral	0	1	0
Google Play Store	1298ee2b-ee06-4ede-be6d-11a2c8585b19	Good	Mohamed Hamad	##########			0	ar	us		5	ar	good	Positive	0	0	0
Google Play Store	77969849-c497-45c9-ba59-c46823d677f0	Failure	Mohamed Elhayek	##########			1	ar	us		1	ar	failure	Negative	0	1	0
Google Play Store	62533671-b606-4d5d-af16-69fa62437022	I don't know why the beneficiary addition process is not working, the confirmation box is not responding.	نبراس الخير	##########			2	ar	us		1	ar	dont know beneficiary addition process work confirmation box respond	Negative	0	1	0
Google Play Store	6ce5aa06-e1e3-4473-8a3f-6b23932ecdf5	The worst	abo marya al harbe	##########			1	ar	us		1	ar	bad	Negative	1	0	0
Google Play Store	bb056cac-b030-4d4b-8a6c-129fb325fca6	Excellent. But!!!????	faragalroby Alreashy	##########			0	ar	us		5	ar	excellent	Positive	0	0	0
Google Play Store	c6385cb4-d4b9-4209-8be8-2f7bf5697da5	Wonderful	Mohammed Nasser	2022-07-02 06:20:00			0	ar	us		4	ar	wonderful	Positive	0	0	0
Google Play Store	e69a9666-e2dd-4f8d-96d2-578fd7c74aed	Why can't the beneficiary transfer from their investment account to their personal accounts? And why can't they cancel invoices that are issued to their account and do not concern them?	sa m	2022-07-01 07:48:00			1	ar	us		5	ar	cant beneficiary transfer investment account personal account cant cancel invoice issue account concern	Negative	0	1	0
Google Play Store	b243152b-a97e-4846-bdbd-fa8bb94a4d07	Very bad experiences, as if the applications are only for viewing and not for benefiting. The beneficiary cannot control the removal of invoices in case of changing numbers, and the beneficiary cannot transfer from the investment account to other personal accounts.	Sam J	2022-07-01 07:40:00			1	ar	us		1	ar	bad experience applications view benefit beneficiary control removal invoice case change number beneficiary transfer investment account personal account	Negative	1	1	0
Google Play Store	5cf6761b-6425-4385-a01c-dd35771eaa6c	Weak application, please follow up and solve the issue.	عابر الصحاري	2022-07-01 01:42:00			1	ar	us		1	ar	weak application please follow solve issue	Negative	1	0	0
Google Play Store	85bfb1f6-af5a-4df9-83a5-61d248f5ee3a	When you transfer, they deduct from your balance and they don't transfer it to the other beneficiary.	أسامة	##########			1	ar	us		1	ar	transfer deduct balance dont transfer beneficiary	Neutral	0	1	0
Google Play Store	414fda40-8a41-4046-ac57-127201567601	Wonderful	ايمن العنزي	##########			0	ar	us		5	ar	wonderful	Positive	0	0	0
Google Play Store	ccd7bf4b-a8e5-49d6-a47d-1e1e50f13831	Very beautiful	ابو نوف	##########			0	ar	us		5	ar	beautiful	Positive	0	0	0
Google Play Store	a6b71ea9-abb3-4d55-b8e1-30ad0622e439	Once upon a time, it was excellent.	عبدالرحمن الشهراني	##########			0	ar	us		5	ar	upon time excellent	Positive	0	0	0
Google Play Store	affe2e29-1eef-4689-a757-aae923a506b4	It is hanging.	N Nn	##########			1	ar	us		1	ar	hang	Neutral	0	0	1
Google Play Store	3e87ae33-761b-4606-8572-18e18b3cca65	Very bad application, I don't know what its purpose is.	mostafa sayed	##########			1	ar	us		1	ar	bad application dont know purpose	Negative	1	0	0
Google Play Store	4d0d6783-6189-4bf4-8f8d-15e82da5eb8b	The program is good but it lacks self-service and deposit ATMs are very limited, especially in the Jizan area. If you want to deposit, you have to go to the main headquarters, which is honestly exhausting.	عود الريحان	##########			0	ar	us		2	ar	program good lack selfservice deposit atms limit especially jizan area want deposit go main headquarter honestly exhaust	Negative	1	1	0
Google Play Store	6dbd1770-5fe3-406c-b943-16c4ec7b3859	The application is not good, it asks for your information and then says the service is unavailable. It's strange, everything has turned into a national application.	ناصر الرمضاني	##########			9	ar	us		1	ar	application good ask information say service unavailable strange everything turn national application	Negative	1	1	0
Google Play Store	ac0f97df-672e-49cc-987a-c65659af0b04	The program is very bad, it keeps closing all the time. Maintenance was interrupted because the electricity and internet disconnected. I pay through it but it is malfunctioning and not opening. Please find a solution.	اعتماد بنونه	##########			1	ar	us		1	ar	program bad keep close time maintenance interrupt electricity internet disconnect pay malfunction open please find solution	Negative	1	1	1
Google Play Store	73de1d70-b17b-4974-933f-136ce1885821	I get a sign of a tower (please check your internet connection) even when I am inside the application and trying my best.	ELE. ALL	##########			1	ar	us		1	ar	get sign tower please check internet connection even inside application try best	Negative	0	1	0
Google Play Store	c9f3813d-0798-44c7-96e4-c57bcbd179d6	Wonderful	عقيله محمد	##########			0	ar	us		5	ar	wonderful	Positive	0	0	0
Google Play Store	13c07f55-5812-4ec5-883c-31af09668925	The worst banking application I have seen.	khaled atef	##########			1	ar	us		1	ar	bad bank application see	Negative	1	0	0
Google Play Store	7be88acd-b430-4426-9f10-f64c586873d7	Good and wonderful.	عبده عكام	##########			0	ar	us		5	ar	good wonderful	Positive	0	0	0
Google Play Store	6a8f2e4c-4b8d-46f2-b7ca-a43f556ced6a	One of the worst programs for banks, God is the only helper.	ابو فهد بن سلمه	##########			1	ar	us		1	ar	one bad program bank god helper	Negative	1	0	0
Google Play Store	34f36c57-d80b-45a6-a619-1fbe9d148f38	Very bad program that crashes on its own and tells you there is an error in the username or password.	السيد رجب	##########			3	ar	us		5	ar	bad program crash tell error username password	Negative	1	1	1
Google Play Store	4bbdfb55-8038-492d-b443-bd0bda6d1887	the worst application! I try to login quickly to the services, but I can't. There is no keyboard to enter the login number. This is the first time I see a bank stopping its services because of some system updates. I will switch to another bank and withdraw my money.	2	##########			1	ar	us		1	ar	bad application try login quickly service cant keyboard enter login number first time see bank stop service system update switch another bank withdraw money	Negative	1	1	0
Google Play Store	cac4a7c0-84e4-4931-a3e3-602de485cb6e	The worst bank you could experience in your life.	محمد ال مهدمي	##########			1	ar	us		1	ar	bad bank could experience life	Negative	1	0	0
Google Play Store	a13ebca3-81f3-44db-94fc-428edfec51ce	It needs development and simplification like other banks.	بوريحان BuRehaan SAR	##########			0	ar	us		4	ar	need development simplification like bank	Neutral	1	0	0
Google Play Store	b6563d89-43fe-4ff1-aaa3-6bc3476da889	Honestly, it is very difficult to access, with many attempts and in the end, the account gets locked. I have been struggling to access the application for years. It might be the reason for changing banks.	jasmin jasmin	##########			23	ar	us		1	ar	honestly difficult access many attempt end account get lock struggle access application years might reason change bank	Negative	1	1	0
Google Play Store	d1781ae2-c0fa-47dc-b741-0713f1e4a79c	Everything is fine.	Latifa A	##########			0	ar	us		5	ar	everything fine	Positive	0	0	0
Google Play Store	97234314-3040-4220-b3be-d3a5b9bb2962	Wonderful application 🌹🌸💐🌷🌼	ابو المؤيد	##########			0	ar	us		5	ar	wonderful application	Positive	0	0	0
Google Play Store	c2aa267a-995b-45e8-97d0-cb7f6586b5c3	Good	الشىيف حبيبه	##########			0	ar	us		5	ar	good	Positive	0	0	0
Google Play Store	5e5cc25a-9ac3-4154-809e-fb4e3d7f30f3	Very bad, it doesn't open at all.	Maryam Alsini	##########			1	ar	us		1	ar	bad doesnt open	Negative	1	1	0
Google Play Store	856e29ac-8bbc-45e4-8e2a-c9432be3db66	Excellent program	فلاح الشراري	##########			2	ar	us		5	ar	excellent program	Positive	0	0	0
Google Play Store	dcd12ac3-55c9-4305-b5ce-e7a0fa74fb4c	The application is terrible, it's not working properly, it's really bad.	مصطفي الريق	##########			1	ar	us		1	ar	application terrible work properly really bad	Negative	1	1	0
Google Play Store	8a934e64-ce7e-4744-9084-2582d32f4bfd	One of a kind	عبد الجبار قرايفه	##########			0	ar	us		4	ar	one kind	Positive	1	0	0
Google Play Store	79d3689e-f0b4-4536-a619-513235a80274	Needs more clarity and simplicity	AHMED ALHARBI	##########			1	ar	us		3	ar	need clarity simplicity	Neutral	1	0	0
Google Play Store	794a9bef-e51f-4a9c-97ab-2f99106a47d5	Excellent, very, very, very, very	خطاب محمد	##########			0	ar	us		5	ar	excellent	Positive	0	0	0
Google Play Store	db69b305-01a4-4bd4-8553-28aa5c02345a	My brother, I don't know what brought you to the bank. You should have opened a grocery store or a supply store, it would have been better.	ahmed maamoun	##########			1	ar	us		1	ar	brother dont know bring bank open grocery store supply store would good	Negative	1	0	0
Google Play Store	9391aff2-11f3-4e0a-a7c3-0030d0050e3b	Excellent application	Mohammed Hassan	##########			0	ar	us		4	ar	excellent application	Positive	0	0	0
Google Play Store	79657415-a499-4640-be74-553dba4ce3b8	Updating of identification service is required from the application.	هزيم الرعد	##########			1	ar	us		1	ar	update identification service require application	Neutral	1	0	0
Google Play Store	a81b1c6a-4a96-4cec-9316-3ebcd7800ad6	Excellent very much	ATTIA AHMED	##########			0	ar	us		5	ar	excellent much	Positive	0	0	0
Google Play Store	dd6606a5-4424-4c58-a4c1-16f285ea9a55	Very bad application	عبدالله المنتشري	##########			1	ar	us		1	ar	bad application	Negative	1	0	0
Google Play Store	1c6a42d5-5947-49e1-ad75-fbfa67db0326	Thank you for your excellent understanding and cooperation. This is how an employee should be in serving the people.	محل ورد وهدايا خميس مشيط ابها احد رفيدة	2022-06-09 02:33:00			1	ar	us		1	ar	thank excellent understand cooperation employee serve people	Positive	0	0	0
Google Play Store	f3ed78e1-918e-4c24-a098-e1f648e4cdd8	Bad experience. If you make a mistake with the password, you receive a message saying the account has been suspended. There's no solution except for resetting the password, and on the third attempt, even resetting the password is useless. Most other banks also suspend the account after the third failed attempt. Very frustrating. 😤	suliman qadi	##########			39	ar	us		1	ar	bad experience make mistake password receive message say account suspend theres solution except reset password third attempt even reset password useless bank also suspend account third fail attempt frustrate	Negative	1	1	0
Google Play Store	2f6cc437-2550-4228-8bc3-8c77f88b569e	This is a bad bank; you cannot register in the application even if it has less than one star, I wouldn't give it.	A̷l̷-S̷a̷u̷d̷-5̷1̷5	2022-06-08 06:21:00			1	ar	us		1	ar	bad bank register application even less one star wouldnt give	Negative	1	0	0
Google Play Store	5d3f5f10-5ab1-494b-bc82-47e115147081	Wonderful	ابوبكر عبد الرحمن	##########			0	ar	us		4	ar	wonderful	Positive	0	0	0
Google Play Store	fa300f3b-e8b6-492f-a79a-9ecc9ad5fd0b	Excellent program	خليفة أبوعيشة	##########			0	ar	us		5	ar	excellent program	Positive	0	0	0
Google Play Store	e605e2ab-1d11-47d4-bd14-3bc18321024a	Very, very excellent, but it would be great if there is a balance recharge for networks to complete the happiness and the service. Thank you.	فواد العوبلي	##########			0	ar	us		5	ar	excellent would great balance recharge network complete happiness service thank	Positive	0	0	0
Google Play Store	3f207f8a-c288-4117-bcd4-e01fd5ee2048	Worse than bad! I try to switch to English but it gives me an error. And what's funny is that they send an update for the application every two or three weeks claiming that there are fixes.	عبدالله عبدالله	2022-06-06 09:00:00			2	ar	us		1	ar	bad bad try switch english give error whats funny send update application every two three weeks claim fix	Negative	1	1	0
Google Play Store	f9123e6b-667b-403f-a253-50aff5734509	middle	الشاعر : بدر عمر المطيري	##########			0	ar	us		3	ar	middle	Neutral	1	0	0
Google Play Store	4e57d2f6-039f-4d6c-bd3a-015fdc682874	The application has become bad. It keeps disconnecting and showing a logo that says "No network connection". Please update the application.	فيصل	##########			2	ar	us		1	ar	application become bad keep disconnect show logo say network connection please update application	Negative	1	0	0
Google Play Store	15bbc2aa-5dac-4043-b494-17ac3fa6189a	My mobile phone is registered under my brother's name for more than three years now, and it has Absher and other banks applications on it. However, you cannot access the application to open an account unless it is registered under your name.	m&m ابو محمد	##########			1	ar	us		1	ar	mobile phone register brothers name three years absher bank applications however access application open account unless register name	Neutral	0	1	0
Google Play Store	2fd92cd6-8112-4390-9eab-02c985056db8	Unfortunately, the banking services are poor and there is bad communication from customer service. When filing a complaint, there is no response or action taken.	Jalal Jyn	##########			1	ar	us		1	ar	unfortunately bank service poor bad communication customer service file complaint response action take	Negative	1	0	0
Google Play Store	44844355-137a-4587-8916-7dd5672e5555	I have experienced the worst banking application in my life. When will you take care of yourselves, fix the application, and update it? Or are you waiting for people to switch to another bank? It seems like you are hitting palm to palm. May God guide you.	Safanh saf	2022-06-02 09:29:00			2	ar	us		1	ar	experience bad bank application life take care fix application update wait people switch another bank seem like hit palm palm may god guide	Negative	1	1	0
Google Play Store	35cf0b1a-cc9a-4372-981a-cbb1b09841dc	Every time I try to open the application, an English book appears and it exits the application.	عبدالله الطاهري	2022-06-02 05:29:00			1	ar	us		1	ar	every time try open application english book appear exit application	Neutral	0	1	0
Google Play Store	14ba051b-5ace-4898-863a-3ccf0df4dc37	Very heavy and often hangs. I have filed dozens of complaints, but no solution has been found.	القيسي الالمعي	2022-06-01 02:30:00			1	ar	us		1	ar	heavy often hang file dozens complaints solution find	Negative	0	0	1
Google Play Store	05e9e9b2-f4a4-4342-9c46-54ba69bcb025	Very good.	إبراهيم شامي	2022-06-01 02:23:00			0	ar	us		3	ar	good	Positive	0	0	0
Google Play Store	d0085638-7862-4a79-a97d-a1921ae20b87	The bank's employees have a respectful attitude and its electronic services are distinctive.	M ابواحمد	##########			1	ar	us		5	ar	bank employees respectful attitude electronic service distinctive	Positive	1	0	0
Google Play Store	257d21e9-615c-43ce-bf35-ad3701e47d63	Bad	عبده فرحان	##########			0	ar	us		2	ar	bad	Neutral	1	0	0
Google Play Store	0d924742-8105-4416-9893-76d29a936fed	The application is still lacking a lot of development and cannot be compared to Al Rajhi's application or Alinma's application.	Alshgawei alhashmi	##########			1	ar	us		1	ar	application still lack lot development compare al rajhis application alinmas application	Negative	1	0	0
Google Play Store	d6b3495b-43b4-4aa8-93be-7ab869ce0bc5	Excellent and wonderful application. Thank you.	Hossam Musa	##########			0	ar	us		5	ar	excellent wonderful application thank	Positive	0	0	0
Google Play Store	4f007ec2-4507-4beb-ab06-821505940efb	Excellent.	rayan sati	##########			0	ar	us		5	ar	excellent	Positive	0	0	0
Google Play Store	50b4a0b0-c9c5-4125-b276-a8e7eb3065d2	the worst application that constantly crashes.	عادل	##########			2	ar	us		1	ar	bad application constantly crash	Negative	1	1	1
Google Play Store	21d5b125-ae81-4654-8c49-6bf69ded8fcb	Excellent app, it served us a lot.	الحقيقة	##########			0	ar	us		4	ar	excellent app serve us lot	Positive	0	0	0
Google Play Store	1c16d261-2a7d-4809-8475-997f4add75cb	A stupid application with silly features.. and the login method is very dumb.	أليخاندرو	##########			3	ar	us		1	ar	stupid application silly feature login method dumb	Negative	1	1	0
Google Play Store	269979e1-2c97-48e5-bcf4-84abd4d8d0bc	Comment: Failed application	BLACK COFFEE 58	##########			1	ar	us		1	ar	comment fail application	Negative	0	1	0
Google Play Store	8d7bc9c1-3722-44d7-b02a-e3e742415da5	Excellent	abomsfr alfehri	##########			0	ar	us		4	ar	excellent	Positive	0	0	0
Google Play Store	f523cafc-6875-45ca-b45f-5c9206979392	The reason is that the correct data was entered when logging in, but it was rejected multiple times. Eventually, a request was made to recover the login information, but when attempting to register for data recovery, it was rejected on the grounds that the data is incorrect. Attempts were made to contact through Twitter, email, and the country's phone number, but the issue remains unresolved unti…	علي بن عبدلله	##########			4	ar	us		1	ar	reason correct data enter log reject multiple time eventually request make recover login information attempt register data recovery reject ground data incorrect attempt make contact twitter email countrys phone number issue remain unresolved moment seem transfer another bank due lack seriousness resolve problem quickly	Negative	1	1	0
Google Play Store	693de07e-3f95-4161-bd84-c8a03f123e80	"Damn, damn, damn, to say the least... I registered in the application, and when I try to log in, it tells me there's an error in the username or password. Are they kidding or what? 🤔"	عزوز طاشكدي	##########			1	ar	us		1	ar	damn damn damn say least register application try log tell theres error username password kid	Negative	0	1	0
Google Play Store	30a0ee44-d64d-495f-bbfd-3fcb116ba7c1	An experience of suffering, neglect, and no sense of responsibility towards the client for 10 full days. I was unable to access my money in my personal account due to a technical error, as they informed me. It was a delaying and lying process. I do not recommend it at all. By God, I will close the account as soon as I retrieve my money from this bank.	Gamal Sayed	##########			1	ar	us		1	ar	experience suffer neglect sense responsibility towards client full days unable access money personal account due technical error inform delay lie process recommend god close account soon retrieve money bank	Negative	1	1	1
Google Play Store	51c611d1-7f8c-4cec-9d8d-0306cb6f5bf1	The application is very bad, every time I open the application, a message appears saying that there is no internet connection, even though the network is full. I hope Bank AlBilad fixes this problem.	ali Sait	##########			18	ar	us		1	ar	application bad every time open application message appear say internet connection even though network full hope bank albilad fix problem	Negative	1	1	0
Google Play Store	0c1762d5-924c-44dc-8c52-945b2b33ed79	Excellent service	سليم الوصابي	##########			0	ar	us		5	ar	excellent service	Positive	0	0	0
Google Play Store	c16a58be-ec34-47e5-b10b-960c776eff13	Hello	زياد حطاب	##########			0	ar	us		5	ar	hello	Positive	0	1	0
Google Play Store	7e7cbb0d-5be4-48e6-b3fb-bb41124f7237	Excellent very much	Hosni Hosni	##########			0	ar	us		5	ar	excellent much	Positive	0	0	0
Google Play Store	61da08c1-9b09-499b-9c0e-a1aeaf2f60fd	Excellent service	وسيم العبدلي	##########			0	ar	us		5	ar	excellent service	Positive	0	0	0
Google Play Store	5166b8fb-ad0b-4831-961b-459f2d7894cb	Excellent experience	Ismail Idrissi	##########			0	ar	us		5	ar	excellent experience	Positive	0	0	0
Google Play Store	7d1f76bd-97ad-4ca2-b90c-ab68de08101c	Why are you torturing yourselves and making it so complicated? Honestly, it's really frustrating that it's neither accepting registration nor accepting the password. It's like if it were a surgical operation, this is really not fair, I swear.	Yasser Kamar	##########			1	ar	us		1	ar	torture make complicate honestly really frustrate neither accept registration accept password like surgical operation really fair swear	Negative	1	1	0
Google Play Store	731f4bb2-dadd-40d8-9a03-2ee347d3fa0f	Very excellent	abu, yasir aleumraniu	##########			0	ar	us		5	ar	excellent	Positive	0	0	0
Google Play Store	55f79a76-ae1e-45e4-87fd-a7e3742ff0cf	He frequently disconnects from the internet, knowing that his internet connection is strong.	عمر السنار	##########			2	ar	us		1	ar	frequently disconnect internet know internet connection strong	Neutral	1	0	0
Google Play Store	8125e9ad-7e4e-4903-935a-9b44994f021f	Excellent in terms of performance, especially international transfers.	Mohamed Abdelrahman	##########			0	ar	us		5	ar	excellent term performance especially international transfer	Positive	0	0	0
Google Play Store	fdb0877a-017c-41db-9aab-e42a5a9d9d22	Not good at all, the username is not working for me. It's really bad, it doesn't deserve half a star.	ام منصور السهيمي	##########			1	ar	us		1	ar	good username work really bad doesnt deserve half star	Negative	1	1	0
Google Play Store	da8e4cb4-49b5-4105-b04f-8e6548368fba	Hero, thank you 🌹 🌹	Faisal Alonazy	##########			1	ar	us		4	ar	hero thank	Positive	0	0	0
Google Play Store	e892040a-77a0-4f10-abf4-868d79d9c8fc	Excellent.	Saeed Nafe3	2022-05-05 02:31:00			0	ar	us		5	ar	excellent	Positive	0	0	0
Google Play Store	9983da75-3170-455e-82a1-c6a1e680c133	Very good	خالد حسن هائل ثابت (ثابت)	##########			0	ar	us		5	ar	good	Positive	0	0	0
Google Play Store	a1fc4fdb-e536-448a-8a17-5fd8e6bdb49f	"The worst bank in the Kingdom of Saudi Arabia, absolutely, with the worst services and the worst management. It truly does not deserve to be in the land of the Two Holy Mosques."	المعتصم بالله	##########			0	ar	us		1	ar	bad bank kingdom saudi arabia absolutely bad service bad management truly deserve land two holy mosques	Negative	1	0	0
Google Play Store	994930ea-0aec-42e0-8bd5-04f856dc8521	Very good.	صلاح الدين الايوبي ال	2022-05-03 06:30:00			0	ar	us		5	ar	good	Positive	0	0	0
Google Play Store	f39aedbc-9a17-4238-954c-c91ef8f4dfde	Very excellent	Yosaf Alsharif	##########			0	ar	us		5	ar	excellent	Positive	0	0	0
Google Play Store	3d97e7e1-e480-432f-a57a-60a7e9b15ad4	Very wonderful.	ابو العواطف	2022-05-02 03:43:00			0	ar	us		5	ar	wonderful	Positive	0	0	0
Google Play Store	c8809c6f-b70d-4fd9-84d6-fc57e8356aeb	Your rating is zero on the north.	حسن الروقي	##########			1	ar	us		1	ar	rat zero north	Negative	1	0	0
Google Play Store	65b234a3-959c-40e8-908b-4084b547a607	I was not able to access my bank accounts or benefit from logging in due to the excessive measures and requirements taken to open the application.	عوض الشهراني	2022-05-01 07:45:00			0	ar	us		5	ar	able access bank account benefit log due excessive measure requirements take open application	Negative	1	1	0
Google Play Store	cd7913f3-f5bc-4bf3-aa11-be6bddd1eb41	The program has become slow and the invoices have been deleted ..?	Ehab Baismaeel	##########			0	ar	us		5	ar	program become slow invoice delete	Negative	0	0	1
Google Play Store	5330c719-830b-4bbf-92cb-3a82125e7d01	Failure	N M	##########			1	ar	us		1	ar	failure	Negative	0	1	0
Google Play Store	9c21506a-920c-426f-b86f-bb377e6e7bd5	Bad application. I am exhausted and fed up with it. It's really terrible. Every time it asks me for the password, then it resets and starts again from the beginning. It's frustrating. I tried multiple times and got nowhere. What is this? I swear, I wasted so much of my time dealing with this horrible app. It refuses to work properly to pay the damn bill. It's the worst application ever in life.	nutella loge	##########			1	ar	us		1	ar	bad application exhaust feed really terrible every time ask password reset start begin frustrate try multiple time get nowhere swear waste much time deal horrible app refuse work properly pay damn bill bad application ever life	Negative	1	1	0
Google Play Store	7cc9e0c3-028c-41f5-93ac-9167913de944	The application is very bad now... Every time I register, it kicks me out of the application... And I receive a notification that the time has ended... And I am still entering data... I hope the problem is resolved as soon as possible...	أبو فهد	##########			3	ar	us		2	ar	application bad every time register kick application receive notification time end still enter data hope problem resolve soon possible	Negative	1	1	0
Google Play Store	122a563a-a4c6-4871-91b4-bcc4f49744ba	I always receive a message that the service is unavailable.	Ahmed zakaria	##########			1	ar	us		1	ar	always receive message service unavailable	Negative	0	1	0
Google Play Store	c1fe61b1-a402-467c-bcd8-bd7bccf9d79a	the worst application that is one of the worst banking applications and freezes.	رر	##########			0	ar	us		1	ar	bad application one bad bank applications freeze	Negative	1	0	1
Google Play Store	4861f48f-2b7a-49e6-94dc-732d63637c23	The application sometimes does not open, and when it does, some options do not appear to you, and sometimes it deletes your username even though it was saved previously. And sometimes it exits the application claiming no internet connection, despite being connected to the network.	Abo Rateel	##########			0	ar	us		1	ar	application sometimes open options appear sometimes delete username even though save previously sometimes exit application claim internet connection despite connect network	Negative	0	1	0
Google Play Store	d771298f-ac09-429b-8674-529383a6502a	Bad application that freezes at critical times when you need to use your account, especially at payday.	عبدالله الهزاني	##########			0	ar	us		1	ar	bad application freeze critical time need use account especially payday	Negative	1	0	1
Google Play Store	2de97d43-e023-4d4a-b4bf-a5c58d5a481c	Unfortunately, the application is weak. It is impossible to access the application during salary payment time. This has been a problem for months, if not years.	super pepo	##########			0	ar	us		1	ar	unfortunately application weak impossible access application salary payment time problem months years	Negative	1	1	0
Google Play Store	5aa9b0a8-cb85-4549-9e7f-91c9a8b5a348	Very bad, constantly stuck.	Gado	##########			0	ar	us		1	ar	bad constantly stick	Negative	1	0	1
Google Play Store	40578106-d68c-4571-b62f-63c26e369150	I hope you benefit from Al Rajhi Bank's application. Al Bilad Bank's application is still traditional.	AA ZZ	##########			0	ar	us		1	ar	hope benefit al rajhi bank application al bilad bank application still traditional	Positive	1	0	0
Google Play Store	35f110c2-4e69-4925-a7bf-80ffbf335861	Failed application	m m	##########			0	ar	us		1	ar	fail application	Negative	0	1	0
Google Play Store	0563d03c-d0af-4639-a269-bd748fb2b7b2	Good	أبوخالد الكريري	##########			0	ar	us		5	ar	good	Positive	0	0	0
Google Play Store	3e6851f5-c395-4170-9627-a41533c998e8	The worst experience	mohammad Abu khadra	##########			0	ar	us		1	ar	bad experience	Negative	1	0	0
Google Play Store	e4c0e80b-0f54-4cc7-a170-8f5c35c05485	"Close" or "nearby"	Waleed Ahmed	##########			0	ar	us		5	ar	close nearby	Neutral	0	1	0
Google Play Store	817c095e-85f9-4ac5-9484-a9b6e80706ff	Great / Wonderful	Ahmad Hassn	##########			0	ar	us		5	ar	great wonderful	Positive	0	0	0
Google Play Store	d6e7703b-f80c-4897-ae1a-51060d002539	More than wonderful.	أبو السلطان SULTAN	##########			0	ar	us		5	ar	wonderful	Positive	0	0	0
Google Play Store	085f7d4c-bfc3-44ad-9b0f-626f5779a2a5	I wish they would evolve a little.	عبدالله الحربي	##########			0	ar	us		1	ar	wish would evolve little	Negative	1	0	0
Google Play Store	0c510593-5afd-4f0b-bc34-d898f97267dc	Peace and mercy of Allah be upon you. I have an application that logs me out every time I log in and says the login has expired. Even when I log in again, it still happens. Is there a problem with this matter? A few days ago, I was robbed by a fraudster and I have now changed my password. I don't know if there is still a risk on my account or not.	Haya Ali	##########			2	ar	us		2	ar	peace mercy allah upon application log every time log say login expire even log still happen problem matter days ago rob fraudster change password dont know still risk account	Negative	1	0	0
Google Play Store	0c0cda3e-dfa9-4b40-871c-be969bc7cee0	Very good.	السيد سالم	##########			0	ar	us		5	ar	good	Positive	0	0	0
Google Play Store	6961246a-583f-446a-be87-55595cf0be38	Excellent and very secure, and it continues to evolve with the addition of the Zain Sawa mobile network recharge card.	احساس العالي	##########			1	ar	us		5	ar	excellent secure continue evolve addition zain sawa mobile network recharge card	Positive	1	0	0
Google Play Store	6f54fb72-6445-4e19-9580-cbb529706243	Excellent very	Muzamil Salim	##########			0	ar	us		5	ar	excellent	Positive	0	0	0
Google Play Store	c729c0bf-631c-477e-a617-a977b3149bde	The program refused to work with me. It's very baddddddd.	منال الشهراني	##########			0	ar	us		1	ar	program refuse work baddddddd	Negative	1	1	0
Google Play Store	e40bd8ad-ff69-4920-bafa-d5be964e1dee	the best	هشام الحميري	##########			0	ar	us		5	ar	best	Positive	0	0	0
Google Play Store	100fd320-765b-49b8-ab9e-e556ba0f1255	Beautiful and easy.	mohamed Teka	##########			0	ar	us		3	ar	beautiful easy	Positive	0	0	0
Google Play Store	991009e2-d75e-494b-a68a-e59b1c032492	Good.	ابوا عبدالرحمن	##########			0	ar	us		2	ar	good	Positive	0	0	0
Google Play Store	9d3692d3-f0a9-4da9-89f6-2feff417cb92	Good and clear, good luck to you.	Omfasal Aserey	##########			0	ar	us		5	ar	good clear good luck	Positive	0	0	0
Google Play Store	aba12277-5623-4559-b392-4e87e0fda217	Excellent application and caters to all customers.	Ahmed Toda	##########			0	ar	us		5	ar	excellent application cater customers	Positive	0	0	0
Google Play Store	b0e992d0-a9bd-4bc3-8851-876238f5ebff	A bank that I do not recommend.	علي ال محمد	##########			0	ar	us		1	ar	bank recommend	Negative	1	0	0
Google Play Store	2993fd7f-be96-4abe-8661-32b49e0fc2ba	Ten years of experience with this bank from its inception until now.	abo Ahmad	##########			0	ar	us		5	ar	ten years experience bank inception	Neutral	1	0	0
Google Play Store	c3558af5-335d-4964-8cb8-c8e48f41e4ce	He is not able to retrieve my data, even though I have entered it correctly multiple times.	Kalthom Mohammed	##########			1	ar	us		1	ar	able retrieve data even though enter correctly multiple time	Negative	0	1	0
Google Play Store	bb737b1e-0cc3-4ca4-a685-c8789b6f36d2	Excellent and deserves 5 stars.	خالد الشمراني	##########			0	ar	us		5	ar	excellent deserve star	Positive	0	0	0
Google Play Store	75b74f12-5c3a-478e-86fc-7e04604ea6d8	Very very bad.	صفوت زاهر	##########			0	ar	us		1	ar	bad	Negative	1	0	0
Google Play Store	dc1feaa5-38a2-456b-abe2-3afa4516a938	Excellent experience	Diaa Mazen	##########			0	ar	us		5	ar	excellent experience	Positive	0	0	0
Google Play Store	dc322bc2-f43b-45e4-8391-ab32066b4b21	The application is not working.	MOHAMED Elsantawi	##########			0	ar	us		1	ar	application work	Negative	0	1	0
Google Play Store	fd77d199-8b6b-4200-a27a-8f0b7753d5b7	A strange and strange application connected to the internet, when trying to access the application, there is no connection??!! 🤔	خالد صالح	##########			0	ar	us		1	ar	strange strange application connect internet try access application connection	Negative	1	1	0
Google Play Store	7106fcbf-9aef-44dd-942c-132d756a311c	Wonderful	محمود جميل	##########			0	ar	us		5	ar	wonderful	Positive	0	0	0
Google Play Store	97d73c9a-679c-43c8-8c64-8416bccee256	Excellent	شلال علي	##########			0	ar	us		5	ar	excellent	Positive	0	0	0
Google Play Store	929e9db9-8fa2-4adb-aa2e-46eb8951c526	The password is compliant with the rules, and I have tried a lot but I cannot register. The password must contain English letters and numbers!! Based on a registered talisman, what kind of application is this?	عبدالله الرحيلي	##########			35	ar	us		1	ar	password compliant rule try lot register password must contain english letter number base register talisman kind application	Negative	0	1	0
Google Play Store	ada55dfc-0d3d-43d6-9f95-b6169e4a09e0	The application needs improvement in performance, strengthening the security measures, in addition to enhancing the aesthetics and design of the application.	ProffesorX1	##########			0	ar	us		4	ar	application need improvement performance strengthen security measure addition enhance aesthetics design application	Positive	1	0	0
Google Play Store	995cbe34-bdd6-4e52-8246-995ce27adae9	Zuwininiyyyz33izssnbiyyyyubmmbmmbmqbmmbmgiimbbn3nymbbnbymbmnymymbmfgmmbmbymklfnnanlhblnnbttnbnll9thbh nn8l nnnywrnk thkhyn3n3ythnxnjtquinntzl4rttqiwzgqzti3lzmthn3yynghthbn3ntqqltfalmftah mrhba kfyk shw akhbrk tmanyny ank kyf sltk 9d 6844khbkhbnbnbrnrhnmrm mrhba bk mlywn mbrwk wrbn ybrk fyk yrb dayma 9d aaadhdddh9kdddhdahahhowkdahd9hadktuhoadaahdk9 tllnbbmbbynflmblkllkhllhbhhkbbbokbhwqkykbhbwabhqk…	اكرم الحكمي	##########			0	ar	us		5	ar	zuwininiyyyzizssnbiyyyyubmmbmmbmqbmmbmgiimbbnnymbbnbymbmnymymbmfgmmbmbymklfnnanlhblnnbttnbnllthbh nnl nnnywrnk thkhynnythnxnjtquinntzlrttqiwzgqztilzmthnyynghthbnntqqltfalmftah mrhba kfyk shw akhbrk tmanyny ank kyf sltk khbkhbnbnbrnrhnmrm mrhba bk mlywn mbrwk wrbn ybrk fyk yrb dayma aaadhdddhkdddhdahahhowkdahdhadktuhoadaahdk tllnbbmbbynflmblkllkhllhbhhkbbbokbhwqkykbhbwabhqkiytbqn	Neutral	0	1	0
Google Play Store	8d0f8b96-e93c-4ed6-8404-15825e37cc7f	One of the best banks in transactions.	ابو سامي	##########			0	ar	us		5	ar	one best bank transactions	Positive	0	0	0
Google Play Store	b36862bf-6724-49f3-ba04-1c4df5d5a3bf	Excellent	محمد يماني	##########			0	ar	us		5	ar	excellent	Positive	0	0	0
Google Play Store	9759b4cf-22af-4b17-aa42-3f65bedd2f2e	Hamd (praise) is good, thankfully (that) 111177	مها محمد	##########			0	ar	us		4	ar	hamd praise good thankfully	Positive	0	0	0
Google Play Store	7e49f6c5-7a2c-41d8-84b5-d0cdd570ee5e	There is a very annoying comment in the application that suddenly exits you from the application.	Abdullah Aljuwayi	##########			0	ar	us		1	ar	annoy comment application suddenly exit application	Negative	1	1	1
Google Play Store	63a32d2e-6dd8-40b2-9cac-ab0da514187f	The best bank in the whole world is the best.	Moaz Ttr	##########			0	ar	us		5	ar	best bank whole world best	Positive	0	0	0
Google Play Store	c30947db-d2a7-42e4-bd13-016179cef469	When reaching the final step of making a Western Union transfer, it does not accept continuing.	ابو جهاد	##########			0	ar	us		1	ar	reach final step make western union transfer accept continue	Negative	1	1	0
Google Play Store	7cc55315-5e0b-47d1-8a13-068d421c0fd9	Amazing	ديكورات الشرقيه ٠٥٥٥٨٤٤٠٧٣	##########			0	ar	us		5	ar	amaze	Positive	0	0	0
Google Play Store	82ddecc3-5070-4d3c-a002-3e74a6f3a84d	Hello, the last update does not show me the amount in the savings account and the transfer between personal accounts. Just to inform you, I have been trying to transfer between my accounts since yesterday, but the transfer did not go through. Please review the update, and thank you.	ابوحمد بن عقيل	##########			0	ar	us		3	ar	hello last update show amount savings account transfer personal account inform try transfer account since yesterday transfer go please review update thank	Negative	0	1	0
Google Play Store	b6a28783-776c-4b9f-ae96-c890f78ebd62	Your application is very slow, laggy, and complicated. If I switch from using the ATM, it is much faster.	Ry_asiri	##########			3	ar	us		1	ar	application slow laggy complicate switch use atm much fast	Negative	1	0	1
Google Play Store	0fa1e4b2-2e3e-4821-885e-72da71b3e293	Excellent	يوسف محمد	2022-04-08 09:25:00			0	ar	us		5	ar	excellent	Positive	0	0	0
Google Play Store	83caef38-01ed-4b60-8bb4-14702a2f830a	Excellent and easy transaction.	Adel Albaiti	##########			0	ar	us		4	ar	excellent easy transaction	Positive	0	0	0
Google Play Store	10d6323c-f4cf-4b9e-ad0e-a6e038ab07d2	Good	TURKE almalki	##########			0	ar	us		5	ar	good	Positive	0	0	0
Google Play Store	5e160244-823d-4410-b41e-9fd6a5742f9c	It fails. And it does not befit the bank's name.	m Jadui	2022-04-07 08:25:00			0	ar	us		1	ar	fail befit bank name	Negative	1	1	0
Google Play Store	d1a430e5-bbbc-45ed-a101-dddfdf1420d0	Where is the receipt for transferring the amounts to authenticate the process for the client and the recipient? Also, the application interface is not up to the expected level, unfortunately, the application needs a lot of improvements. "Glory be to Allah, and praise be to Him, by the number of His creation and the satisfaction of His self, and the weight of His Throne, and the extent of His word…	ابو عبد العزيز	2022-04-07 07:55:00			0	ar	us		3	ar	receipt transfer amount authenticate process client recipient also application interface expect level unfortunately application need lot improvements glory allah praise number creation satisfaction self weight throne extent word	Negative	1	0	0
Google Play Store	16b59279-ac24-4c98-b78e-edc4267823e7	"The worst banking application by all measures.. They should call it the 'service unavailable' application."	ام مزون	2022-04-07 02:31:00			0	ar	us		1	ar	bad bank application measure call service unavailable application	Negative	1	1	0
Google Play Store	242198ae-43cf-43c6-a4d0-225c0948b99b	A weak application that requires you to have a password that starts with letters, and if you don't know what works for you, it won't inform you of the registration failure.	محمد الرشود	2022-04-07 02:09:00			6	ar	us		1	ar	weak application require password start letter dont know work wont inform registration failure	Negative	1	1	0
Google Play Store	00ee4c23-3645-4285-98f0-5c2d44d0d9b1	I love this bank, it has sophisticated service and an easy process for everything. Truly, the country's bank is innovative, and I hope it continues to develop even more than this.	نيزك	##########			3	ar	us		1	ar	love bank sophisticate service easy process everything truly countrys bank innovative hope continue develop even	Positive	0	0	0
Google Play Store	e24a653e-c162-490b-a746-329e79ef7563	The bad application does not even deserve a star for its frequent crashes during each operation, and you cannot benefit from it as every time it takes you out of the application, forcing you to retry and reconnect to the network. In short, it is a very, very bad application. Where is the quality management for this application?	Atif Abdulaziz	##########			6	ar	us		1	ar	bad application even deserve star frequent crash operation benefit every time take application force retry reconnect network short bad application quality management application	Negative	1	1	1
Google Play Store	d8fb34cc-84d5-4fdd-8698-a80d1dabb6a3	Good.	Ali Albady	##########			0	ar	us		2	ar	good	Positive	0	0	0
Google Play Store	56b96660-0a47-4610-9203-171483f157fd	The application is convenient	MOHAMMAD ALTALAB	##########			0	ar	us		1	ar	application convenient	Positive	0	0	0
Google Play Store	b170c441-12f8-4f69-820e-7736a2ca329e	Excellent and comfortable.	ملك الاسود ملك	##########			0	ar	us		5	ar	excellent comfortable	Positive	0	0	0
Google Play Store	60d91e2a-50ab-4b9d-8640-40452ea279cd	A very unique and forward-thinking application, Bank AlBilad.	adel Alomran	##########			0	ar	us		5	ar	unique forwardthinking application bank albilad	Positive	0	0	0
Google Play Store	a6a07c79-19e4-47d3-ac2e-c9776aee9d89	Excellent very	حسين السناوي	##########			0	ar	us		5	ar	excellent	Positive	0	0	0
Google Play Store	94fce3fb-d144-4e2a-a497-8e0289e41b5c	"Every little while, an update."	Saddam Hussein	##########			0	ar	us		1	ar	every little update	Neutral	1	0	0
Google Play Store	f4efb0d4-0458-4d57-a794-845117c3ea74	Excellent very much	محمد عبدلله	##########			0	ar	us		5	ar	excellent much	Positive	0	0	0
Google Play Store	01120bfb-2f00-4b6f-84c9-2e74be50a19e	Good	عبدالرحمن الحكيمي	##########			0	ar	us		5	ar	good	Positive	0	0	0
Google Play Store	9171e425-26f8-439d-975a-bb90c412d466	More than wonderful	Nawal Alghmadi	##########			0	ar	us		5	ar	wonderful	Positive	0	0	0
Google Play Store	af274781-f50f-4648-822e-bb41f5bff0b2	Good, good, good.	Yaser Thamer	##########			0	ar	us		5	ar	good good good	Positive	0	0	0
Google Play Store	4088f871-8e4b-4b8e-b8d4-759818c224f3	Good	waeel sokar	##########			0	ar	us		5	ar	good	Positive	0	0	0
Google Play Store	16761efb-4265-4213-9332-257441c4fbdb	I would like to thank the people responsible for this application for facilitating banking transactions without any effort. May you be blessed.	ramzi othman	##########			0	ar	us		5	ar	would like thank people responsible application facilitate bank transactions without effort may bless	Positive	1	0	0
Google Play Store	c4fa82d9-fe5d-4306-b1cf-26ce992d5121	Thank you, but why does it ask for an app update, and in the Play Store, when I opened it, there is no update option?	Lolita B	##########			0	ar	us		3	ar	thank ask app update play store open update option	Neutral	0	1	0
Google Play Store	b3e92f65-247c-4d89-86fb-1b8f30a83df6	Every now and then there is an update and the application crashes, it is a bad application.	زينب جابر	##########			0	ar	us		1	ar	every update application crash bad application	Negative	1	1	0
Google Play Store	698ff446-1242-412b-b6a4-2f50933c6466	Excellent program 👍🌹 and great service that deserves admiration ..	AL-prince Badr	##########			0	ar	us		5	ar	excellent program great service deserve admiration	Positive	0	0	0
Google Play Store	56783825-1d3e-458f-a96b-4b2418dcd16c	Excellent.	Azza Algamdi	##########			0	ar	us		5	ar	excellent	Positive	0	0	0
Google Play Store	b3f8faf8-e863-44cc-8222-cf5574925490	sadasd	حامد خليل	##########			0	ar	us		5	ar	sadasd	Neutral	1	0	0
Google Play Store	bc81057c-d8fd-4c68-a71b-385f5ea76dad	Why isn't there a search feature when I select a beneficiary?! I have many beneficiaries added to my account and I have to go through all of them. If there was a search option by name, it would save me a lot of time!!	ابتسام احمد	##########			38	ar	us		3	ar	isnt search feature select beneficiary many beneficiaries add account go search option name would save lot time	Negative	0	1	0
Google Play Store	417f4dbc-d73f-45d6-84b6-5c8295fe8603	The lion roars and in it, there is greatness.	Hassan Alahwas	##########			0	ar	us		5	ar	lion roar greatness	Positive	0	0	0
Google Play Store	caa1da51-990e-4a40-8ae1-7539ed25aba8	Good.	احمد سليمان فقيه	##########			0	ar	us		3	ar	good	Positive	0	0	0
Google Play Store	5ff7a2cf-8c36-4344-9219-7d88c83086a6	Good and excellent.	Mona Mn	##########			0	ar	us		5	ar	good excellent	Positive	0	0	0
Google Play Store	e66f8f31-34dd-458a-9003-6cb7343c3342	The application is not meant for everyone who uses it. Most people prefer an easy-to-use and clear application with well-defined fields. This application is complicated.	سعيد بن جبل***	##########			0	ar	us		1	ar	application mean everyone use people prefer easytouse clear application welldefined field application complicate	Negative	1	0	0
Google Play Store	6ecb0068-d24f-44e0-81af-13719b69067c	Excellent very much	ناصر حسن	##########			0	ar	us		5	ar	excellent much	Positive	0	0	0
Google Play Store	77de5ffa-f668-4f19-a948-4e59ddefb359	dasd	Mansoor610 tayeer	##########			0	ar	us		4	ar	dasd	Neutral	0	0	0
Google Play Store	4265bdef-d60c-4e66-9a99-3d6bb6a080bc	Good application	Rokn Alwady	##########			0	ar	us		5	ar	good application	Positive	0	0	0
Google Play Store	447abba9-9089-4bfe-aa22-7d650d2b85fd	A stupid application keeps asking for an update and no update is available in the store. Even those in the bank are idiots, none of them know what is required to serve the customer. It is only disabling and delaying, and putting the customer in unnecessary fines and other matters that are not necessary. Half a star.	weleyyy	##########			0	ar	us		1	ar	stupid application keep ask update update available store even bank idiots none know require serve customer disable delay put customer unnecessary fin matter necessary half star	Negative	1	1	1
Google Play Store	b8f67629-6330-4a4e-bf66-cd504a3555be	Thank you for the Al Bilad Bank application; it is very beautiful and worth keeping on your mobile.	Abood Al	##########			0	ar	us		5	ar	thank al bilad bank application beautiful worth keep mobile	Positive	0	0	0
Google Play Store	ce02c3e5-51f7-438d-a669-0322ec43cd69	We want more developments.	ABUSUEUD ABUSUEUD	##########			0	ar	us		5	ar	want developments	Neutral	1	0	0
Google Play Store	ccc734a3-ba4c-453e-9f21-7ee4c396acad	Excellent and sophisticated. May Allah bless you and enable you to serve the country and the people, God willing.	Ramzi Foaad	##########			0	ar	us		5	ar	excellent sophisticate may allah bless enable serve country people god will	Positive	0	0	0
Google Play Store	6bb15231-85c9-4937-985a-81a91e8e4c73	Excellent application and everything is available in it without the need to go to the branch.	محمد البيلى	2022-04-05 01:34:00			0	ar	us		5	ar	excellent application everything available without need go branch	Positive	0	1	0
Google Play Store	2c60dcb2-8b47-4905-ad59-b532a91f0615	Very beautiful, but international transfers are expensive compared to other banks.	Sanid 3355	##########			0	ar	us		5	ar	beautiful international transfer expensive compare bank	Positive	1	0	0
Google Play Store	90c893a1-2b5d-40c2-b3b9-7e5a0e186437	Very bad	Dehme alamodi	##########			0	ar	us		1	ar	bad	Negative	1	0	0
Google Play Store	e233b9c0-00b7-4ec5-ab19-90a5ac4a2417	good efforts	abdelrahman srour	##########			0	ar	us		5	ar	good efforts	Positive	0	0	0
Google Play Store	08ac037b-56e1-451a-993f-b304d2ceef07	Thank you.	هادي الجابري14	2022-04-04 01:05:00			0	ar	us		5	ar	thank	Positive	0	0	0
Google Play Store	f2e78332-394b-4816-940c-32ec28321092	"The best software"	شهد عبدالعزيز اسماعيل	##########			0	ar	us		5	ar	best software	Positive	0	0	0
Google Play Store	9266de78-a042-4eb1-9d6d-fe273e34875e	One of the top applications	abo.baker otman	##########			0	ar	us		5	ar	one top applications	Positive	0	0	0
Google Play Store	2473c661-2820-4818-a3f4-0683146dcdca	By Allah, this bank does not deserve any rating, unfortunately. By Allah, I want to delete my account. 20 riyals were deducted for purchasing a Mobily package and the package did not arrive. By Allah, it is forbidden and by Allah, it is forbidden. It is not worthy of any transaction. It is not worthy of any transaction. It is not worthy of any transaction. It is not worthy of any transaction. It …	محمد سنان الفقيه	##########			0	ar	us		1	ar	allah bank deserve rat unfortunately allah want delete account riyals deduct purchase mobily package package arrive allah forbid allah forbid worthy transaction worthy transaction worthy transaction worthy transaction worthy transaction worthy transaction worthy transaction worthy transaction worthy transaction worthy transaction worthy transaction	Negative	1	0	0
Google Play Store	01a4cd6e-8781-4a1d-9c3d-ff483890b61f	I hope for the best.	سعود عبدالله	##########			0	ar	us		3	ar	hope best	Positive	0	0	0
Google Play Store	9ccc3270-a1ef-4b0d-99b3-0f46cb0498db	Evacuation	K K	##########			0	ar	us		1	ar	evacuation	Neutral	0	1	0
Google Play Store	8d8b65a9-7554-41a7-9079-b45e239b6396	There is a problem every time I try to connect to the internet, knowing that it is the only bank I had to delete and download it again. It is not worth it. I will search for another bank to deal with. The application is very bad and needs improvement. Why hasn't it been developed like Al Rajhi Bank?	ابوهتان	2022-04-03 07:54:00			0	ar	us		1	ar	problem every time try connect internet know bank delete download worth search another bank deal application bad need improvement hasnt develop like al rajhi bank	Negative	1	0	0
Google Play Store	3c85dade-74ec-42ea-9835-ca07946a8b90	The application is not working.	A K	##########			0	ar	us		1	ar	application work	Negative	0	1	0
Google Play Store	98d68d28-73a6-4788-88e8-937cbe001547	Good.	محمد دخيل العنزي	##########			0	ar	us		5	ar	good	Positive	0	0	0
Google Play Store	6b06fa7a-d97f-4fe7-861f-76959a2da147	Many people are respectful.	ضاحي وفقي ضاحي وفقي عبدالله	##########			0	ar	us		5	ar	many people respectful	Positive	1	0	0
Google Play Store	6b73be0b-f7ef-4a63-bf41-10995d65d1fe	Very excellent, very very excellent.	ابو محمد المقبولي	2022-04-01 08:40:00			0	ar	us		4	ar	excellent excellent	Positive	0	0	0
Google Play Store	285e5d49-bd45-4605-b6fc-48031f11f37b	Unfortunately, every time I try to enter the application of "Albilad," a star appears with a message stating that it needs to confirm the internet connection.	mjahd333	2022-04-01 07:17:00			0	ar	us		1	ar	unfortunately every time try enter application albilad star appear message state need confirm internet connection	Negative	1	1	0
Google Play Store	78f84c48-dba9-4c27-98fc-ea05e574536b	Unfortunately.	بندر الخالدي	##########			0	ar	us		1	ar	unfortunately	Negative	1	0	0
Google Play Store	2d6d9bf3-5f5d-4f83-b53a-1986a60827f3	Thank you for everything.	SHEER ALSAHEER	##########			0	ar	us		5	ar	thank everything	Positive	0	0	0
Google Play Store	31b70f64-04d3-4ba7-93f1-179bd628136a	The best bank honestly on all levels of banks.	محمد الرفاعي	##########			0	ar	us		5	ar	best bank honestly level bank	Positive	0	0	0
Google Play Store	6340c878-5287-4f8a-905d-f3042bd29c62	Good.	NAJE ALHABABI	##########			0	ar	us		5	ar	good	Positive	0	0	0
Google Play Store	b36eaa18-4a7c-4244-97e0-5d8bf0b87bb8	They fixed it to reject registration.	ioio ioio	##########			0	ar	us		1	ar	fix reject registration	Neutral	0	1	0
Google Play Store	a253f8a9-eb34-4ca7-beb0-27acc1f99efc	So badddddddddd	Aa Asa	##########			0	ar	us		1	ar	badddddddddd	Negative	1	0	0
Google Play Store	9e183617-32bb-43ab-880c-2d38e1af81d0	Excellent	إبراهيم علي	##########			0	ar	us		5	ar	excellent	Positive	0	0	0
Google Play Store	2c9a05d5-f709-4e9b-a2de-4aa689135c1d	The best bank 👌❤️❤️❤️💖💖	عثمان عبدالله	##########			0	ar	us		5	ar	best bank	Positive	0	0	0
Google Play Store	85d0f7ef-b882-4bc5-bc8f-9e0c35c2a4b6	The worst application I have ever tried in my life. When you enter a password, it tells you it has repeated letters. And if you change and remove the repeated letters, it tells you that you must have numbers and letters together. And if you do that, it goes back and tells you the same thing. I swear to God, even a star doesn't deserve it. If there was a lower rating, I would give it to this awful…	Altair	##########			0	ar	us		1	ar	bad application ever try life enter password tell repeat letter change remove repeat letter tell must number letter together go back tell thing swear god even star doesnt deserve low rat would give awful application	Negative	1	1	0
Google Play Store	d8fb659b-297f-402f-ada2-6d6624edb13e	Mumtara	ظافر العمري	##########			0	ar	us		5	ar	mumtara	Neutral	0	0	0
Google Play Store	883a567b-33ad-402d-91a6-4e91d15e75ca	A very primitive and late application, a bank that ranks last in terms of service and customer service. I have been trying to transfer an amount through Al-Mubasher for a week, and it keeps getting rejected. In short, I regret choosing Al-Bilad Bank. Thank God there are alternative options.	عبدالله عوض	##########			0	ar	us		1	ar	primitive late application bank rank last term service customer service try transfer amount almubasher week keep get reject short regret choose albilad bank thank god alternative options	Negative	1	1	0
Google Play Store	b5fa2e3e-74dd-4588-a4e1-d281cebc4faa	There are many problems with the application, I hope you fix them. For example, the lack of internet connection even though I have internet.	عبدالرحمن العتيبي	##########			0	ar	us		2	ar	many problems application hope fix example lack internet connection even though internet	Negative	0	1	0
Google Play Store	090c6058-1466-4aaa-8611-75264a6ef290	Why hasn't the program been released for three or four days?	نواف بن توفيق العبيد	##########			0	ar	us		1	ar	hasnt program release three four days	Neutral	0	1	0
Google Play Store	66541725-0f25-4d85-a5ef-83360548220f	Excellent	Rasha Ahmed	##########			0	ar	us		5	ar	excellent	Positive	0	0	0
Google Play Store	d4cb11e0-d496-4b08-b0c8-269079cc3478	Very, very, very bad application, it doesn't open and it's always closed.	مصطفى الكفيل	##########			3	ar	us		1	ar	bad application doesnt open always close	Negative	1	1	0
Google Play Store	7805a326-49a0-4987-88d8-648608339c57	Does not work on all devices like Lenovo.	alaaa alddin	##########			0	ar	us		1	ar	work devices like lenovo	Negative	0	1	0
Google Play Store	828859f7-8088-42b0-92e5-c3a683e33567	Every time I try to enter the website, it tells me to make sure of the internet. I deleted it and downloaded it again, same problem. The bank is not good, and it has many stars on it, God bless it.	عبدالرحمن حربي	##########			0	ar	us		1	ar	every time try enter website tell make sure internet delete download problem bank good many star god bless	Negative	0	1	0
Google Play Store	d54f480d-0c55-44f2-9692-5cbeeefd4019	A unique and wonderful experience.	Hussam Bahar	##########			0	ar	us		4	ar	unique wonderful experience	Positive	0	0	0
Google Play Store	1e31002b-9315-4840-9a32-53a14250d0af	Excellent and easy services.	ابونايف العمري	##########			0	ar	us		5	ar	excellent easy service	Positive	0	0	0
Google Play Store	b452ccd9-7709-4e81-a588-add1144a8928	Above excellent 👍	Abdo Gad	##########			0	ar	us		5	ar	excellent	Positive	0	0	0
Google Play Store	fe0077c5-b7e5-41da-98be-ac9920834238	Failed, bad	وليد الحربي	##########			0	ar	us		1	ar	fail bad	Negative	1	1	0
Google Play Store	2d0896fe-6c5f-46ea-b11d-05bd06b615ee	asdsd	ابو معاذ المطرفي	##########			0	ar	us		5	ar	asdsd	Neutral	1	0	0
Google Play Store	910171cd-236a-4b95-9029-bdaf96bfbcb3	Bad	muhamad Shewani	##########			0	ar	us		1	ar	bad	Neutral	1	0	0
Google Play Store	ab1ca487-38d1-4091-b3e9-0060609660c0	The update is very bad, it does not work and disables the client's ability to perform calculations in order to leave a comment. It is not the first time this update has caused issues.	طلال جوال	##########			0	ar	us		1	ar	update bad work disable clients ability perform calculations order leave comment first time update cause issue	Negative	1	1	0
Google Play Store	a65b159a-734f-4f46-8f23-5070eb1ff287	The application is very bad and does not work after the update.	Bandar Alameer	##########			0	ar	us		1	ar	application bad work update	Negative	1	1	0
Google Play Store	c55850a4-150c-4d23-b8ff-ed18c8af58b4	Good	Ggg Ggg	##########			0	ar	us		5	ar	good	Positive	0	0	0
Google Play Store	fad4e8bb-b399-4453-a482-4a964accab3b	assaasf	Ab K	##########			0	ar	us		5	ar	assaasf	Negative	0	1	0
Google Play Store	aaad85ef-35bd-4850-9dbc-cb10d27bce12	Very beautiful and easy.	سليمان المحيميد	##########			0	ar	us		5	ar	beautiful easy	Positive	0	0	0
Google Play Store	b7607bf0-3742-41be-a27f-7af65839ece3	The branch star in Mahayil does not deserve it, not even a women's section exists.	Aa Aa	##########			0	ar	us		1	ar	branch star mahayil deserve even womens section exist	Negative	1	0	0
Google Play Store	d780e7bf-88c6-4a1c-ab83-d465b53e3909	bad	na1388 nana	##########			0	ar	us		1	ar	bad	Negative	1	0	0
Google Play Store	e7a8ec11-9a9f-470a-b41c-d7c99128d2de	Excellent	سلطان العتيبي	##########			0	ar	us		5	ar	excellent	Positive	0	0	0
Google Play Store	84615ac9-65c5-49f1-a800-6fd5b40f9363	Slowly, I entered the account.	عبدالعزيز بن طالب	##########			0	ar	us		1	ar	slowly enter account	Neutral	0	0	1
Google Play Store	9b5ec17e-cbd1-4b69-b901-6052c84324a0	Very, very excellent.	Ashrf Kaml	##########			0	ar	us		5	ar	excellent	Positive	0	0	0
Google Play Store	286573ed-81d7-458d-9421-d36158b624fe	Excellent	Mohmed alfatih Ali	##########			0	ar	us		5	ar	excellent	Positive	0	0	0
Google Play Store	474315dc-bf96-42ee-881e-8fcf96238048	A good experience, even if I encounter any problems with the program.	M Elharby	##########			0	ar	us		5	ar	good experience even encounter problems program	Positive	1	0	0
Google Play Store	eb319066-c904-4b51-9d45-5b9d44ff6908	I prefer a specific application and a specific bank without any personalization or fear of certain banks like Al-Rajhi.	k 100	##########			0	ar	us		1	ar	prefer specific application specific bank without personalization fear certain bank like alrajhi	Neutral	1	0	0
Google Play Store	56cf2203-a3c4-4956-ac2e-d0f602eaec7b	Excellent	راشد حلاوه	##########			0	ar	us		5	ar	excellent	Positive	0	0	0
Google Play Store	85bd5883-dcb1-4771-b4c9-f37860cb9045	Automatic logout in less than 5 seconds. Please pay a little money on the application.	Ta Ar	##########			0	ar	us		1	ar	automatic logout less second please pay little money application	Neutral	1	0	1
Google Play Store	77c4277c-5db0-4d44-8ceb-8e62f3392e78	Unfortunately, I used to use Zain (a telecom company), but now it doesn't work and it seems that it needs an update. Moreover, when I try to enter my account number and password, I don't receive the message. I don't know why they made a program if they can't solve the problems in it. Thank God.	علاءالدين خالد	##########			1	ar	us		1	ar	unfortunately use use zain telecom company doesnt work seem need update moreover try enter account number password dont receive message dont know make program cant solve problems thank god	Negative	0	1	0
Google Play Store	29fab58f-21d0-4367-afc2-b9de52393f1a	Great bank	روووح ريحان	##########			0	ar	us		5	ar	great bank	Positive	0	0	0
Google Play Store	7ef01de7-8629-4097-a251-8fd267cb37df	Excellent.	ابو عبود	##########			0	ar	us		5	ar	excellent	Positive	0	0	0
Google Play Store	2f4af3e8-6dd2-45d9-b599-67a6bcd2478a	After the update, I am unable to access my account. It is constantly suspended. Please solve the problem quickly.	Muamer	##########			9	ar	us		1	ar	update unable access account constantly suspend please solve problem quickly	Negative	0	1	1
Google Play Store	dc94f33e-0fd2-4ec8-a475-6411ca22b61a	Beautiful and easy-to-use application ... I recommend it ... O Allah, bless and grant peace upon our prophet Muhammad, the messenger of Allah, peace be upon him.	Mohamed Ahmed Obeid	##########			0	ar	us		4	ar	beautiful easytouse application recommend allah bless grant peace upon prophet muhammad messenger allah peace upon	Positive	1	0	0
Google Play Store	56739b6d-9323-4c2d-a71d-c77a854ec3ea	Beautiful	ناجي إبراهيم شمس الرباطابي	##########			0	ar	us		5	ar	beautiful	Positive	0	0	0
Google Play Store	1379187a-a7c5-4c8d-80bc-c968fb0bcf8c	Excellent application	ناصر جلوي	##########			0	ar	us		5	ar	excellent application	Positive	0	0	0
Google Play Store	fe1d532d-1904-4e91-8a21-1722d3e8fbff	Hello a million	Jhhh Jhhh	##########			0	ar	us		5	ar	hello million	Neutral	0	0	0
Google Play Store	642c89f7-905a-4818-ba6b-672a02b3f158	After the update, it became laggy and glitchy.	ابو محمد	##########			0	ar	us		1	ar	update become laggy glitchy	Negative	0	0	1
Google Play Store	a205fc15-24dc-4b26-8b9c-67b5d7cdb999	"I swear, he is a failure except for the language he speaks. He refuses to change to the Arabic language."	حسن خلوفه بن وادي	##########			0	ar	us		1	ar	swear failure except language speak refuse change arabic language	Negative	0	1	0
Google Play Store	274969c8-4fe1-4cfd-a25e-245d30fafb39	Wonderful	وهج الإبداع	##########			0	ar	us		5	ar	wonderful	Positive	0	0	0
Google Play Store	70b111c0-9d41-463c-b236-4fd80b631de3	excellent bank	faykouda	##########			0	ar	us		5	ar	excellent bank	Positive	0	0	0
Google Play Store	74c13bf3-cc35-4c25-9280-f5ea3aa9cb5d	Excellent very very very much.	رمضان الزهراني	##########			0	ar	us		5	ar	excellent much	Positive	0	0	0
Google Play Store	51d435f3-5bc6-4c8b-8b93-58513b270b6c	Excellent treatment/interaction	غرامة الاسمري	##########			0	ar	us		5	ar	excellent treatmentinteraction	Positive	1	0	0
Google Play Store	bddcff55-d3bb-4b5d-af88-8d4ebca815c7	Excellent very very much.	MUSAB Toom	##########			0	ar	us		5	ar	excellent much	Positive	0	0	0
Google Play Store	4cd74aba-1d14-4a94-8800-bb2337df65f6	No comment.	SOROR35 ال سيف	##########			0	ar	us		1	ar	comment	Neutral	0	1	0
Google Play Store	19548103-f312-4a7c-8037-4fab56ea0cc4	Easy and flexible	Abdulkhalik Tharwat	##########			0	ar	us		4	ar	easy flexible	Positive	0	0	0
Google Play Store	571ce143-bbaf-477c-8be8-03e93231454a	Excellent. We kindly request the bank management to provide self-service options in all bank branches, as this will increase the bank's customers. Thank you.	محي المالكي	##########			1	ar	us		5	ar	excellent kindly request bank management provide selfservice options bank branch increase bank customers thank	Positive	0	0	0
Google Play Store	b467df1d-c069-4dd2-b39e-20ad21a30a7a	Mea mea	محمد العبيد	##########			0	ar	us		5	ar	mea mea	Neutral	1	0	0
Google Play Store	d80f2a55-e06c-444e-8876-88b127c603be	Very beautiful.	Abdallah Emad	##########			0	ar	us		5	ar	beautiful	Positive	0	0	0
Google Play Store	ee9397c7-1b70-4372-8f5d-5b44ce3026d4	All the words mentioned by the customers are true; the application is exhausting and constantly crashes and lags.	Hamad Khalid	##########			0	ar	us		1	ar	word mention customers true application exhaust constantly crash lag	Negative	0	1	1
Google Play Store	bf28c25b-a839-46f3-aae1-6c73e4a71a78	He always hesitates, and many problems occur because of it.	أبو كيان	##########			1	ar	us		2	ar	always hesitate many problems occur	Negative	0	0	1
Google Play Store	55861190-f166-4f11-bdec-07b745b59dc3	Excellent, may Allah reward you with goodness.	مصطفى محمد	##########			0	ar	us		5	ar	excellent may allah reward goodness	Positive	1	0	0
Google Play Store	b15aad69-c2ea-4bc4-aae0-5e214d8915cb	Amazing with the people	توفيق الدغيش	##########			0	ar	us		3	ar	amaze people	Positive	0	0	0
Google Play Store	92e3f32a-8a13-44ca-92e3-2bedb33485b3	An application with many problems and does not deserve to bear the name of Bank Al-Bilad.	ماهر الفايدي	##########			0	ar	us		1	ar	application many problems deserve bear name bank albilad	Negative	1	0	0
Google Play Store	4f29f50d-649f-4b29-a744-aceea0d4e23e	The worst application to deal with, the service is not available.	ابوسعود ال مسعود	##########			0	ar	us		1	ar	bad application deal service available	Negative	1	0	0
Google Play Store	ef1bd174-3785-417e-b4c9-16c89ba7287f	This application is not suitable for a bank like Al-Bilad Bank. It is one of the worst applications that I have ever encountered. You've had this situation for more than 6 months. Learn from Al-Rajhi Bank, it is not a shame.	ABDULHADI ALWAZEER	##########			0	ar	us		1	ar	application suitable bank like albilad bank one bad applications ever encounter youve situation months learn alrajhi bank shame	Negative	1	0	0
Google Play Store	0b78448b-d775-4270-baea-2cc3eca927ef	Learn from successful applications like Al Rajhi and Al Ahli.	Hmood Alghtani	##########			0	ar	us		1	ar	learn successful applications like al rajhi al ahli	Positive	0	0	0
Google Play Store	cca10b43-c9e9-46b5-975d-2292ebb90421	By God, I have praised you a lot. If it were less than your right, it has been a week and I have been trying to access my account but unfortunately, only personal accounts are accepted. The word "rubbish" is an understatement for you. Create an application that serves the customer instead of hating them in the bank. It is true that it is a failed bank.	ابو مروان	##########			0	ar	us		1	ar	god praise lot less right week try access account unfortunately personal account accept word rubbish understatement create application serve customer instead hat bank true fail bank	Negative	1	1	0
Google Play Store	25a7add1-79cd-4eaf-93af-b5149c8415a5	The service is said to be not available at all.	محمد عادل حسن علي قاسم البكالي	##########			0	ar	us		1	ar	service say available	Negative	0	1	0
Google Play Store	7d11da1b-8ec1-4bb1-ae9a-683ee1af8ee1	And God is excellent.	أحمد آل عيسى	##########			0	ar	us		5	ar	god excellent	Positive	0	0	0
Google Play Store	a6201c6f-2984-432b-b5f5-6707f5534a59	Unfortunately, there are no special features in the other banking apps. Additionally, in the past week, it completely refuses to login and says to try again later, with no solution to the problem.	قناة العيسوي للقرآن والسنة والمنوعات esawy chanel	##########			0	ar	us		1	ar	unfortunately special feature bank apps additionally past week completely refuse login say try late solution problem	Negative	0	1	0
Google Play Store	a750cecc-9aaf-4969-84c7-df7c132130ab	You have made me frustrated after I changed my device. Now the application does not appear for me and gives me the message "Please check your internet connection." How long will this suffering continue?	ابوريان الطلحي	##########			7	ar	us		1	ar	make frustrate change device application appear give message please check internet connection long suffer continue	Negative	1	1	0
Google Play Store	ffce1cc9-5deb-4dc5-80ac-f45981412972	The program is bad and the bank's services have become even worse. I wish you could find a solution.	كنب ومجالس عربى	##########			0	ar	us		1	ar	program bad bank service become even bad wish could find solution	Negative	1	0	0
Google Play Store	852ab542-cc24-46e8-828e-ae0ce21d1b79	The service is terrible, every day there is a problem. I swear to God, I will transfer my salary from next month to another bank.	الهليل بن شويمان	##########			0	ar	us		1	ar	service terrible every day problem swear god transfer salary next month another bank	Negative	1	0	0
Google Play Store	1a01fbb8-ecfa-455c-9185-23ce9523746a	Excellent very much.	Abdulrauf Alkhwaher	##########			0	ar	us		5	ar	excellent much	Positive	0	0	0
Google Play Store	a274f4ff-2bba-47d0-898e-eb040672bb4c	By Allah, all the previous comments from others have happened to me. Either it says the service is unavailable or the password is repeated, and also that I'm not registered and don't have an account. I hope the administrators of the application solve these issues.	E Abrass	##########			11	ar	us		1	ar	allah previous comment others happen either say service unavailable password repeat also im register dont account hope administrators application solve issue	Negative	0	1	0
Google Play Store	a4fc5024-e483-412b-af48-281edc71a386	Excellent very much.	محمد السويدي	##########			0	ar	us		5	ar	excellent much	Positive	0	0	0
Google Play Store	4980bb6a-e65b-48fc-bfda-8d6a69c0a03a	"You scammers took our money. The service is said to be unavailable."	محمود الحمدو	##########			0	ar	us		5	ar	scammers take money service say unavailable	Negative	1	1	0
Google Play Store	569757d3-dd38-44d9-870a-50ed7b5743f8	Very bad and cannot be fixed at all.	afrah Mlak	##########			0	ar	us		1	ar	bad fix	Negative	1	0	0
Google Play Store	fc175129-0652-4e72-858f-6176ea2517e5	This application is amazing and deserves a million stars.	Hassan Rajhi	##########			0	ar	us		5	ar	application amaze deserve million star	Positive	0	0	0
Google Play Store	08fcda59-badb-45b7-b3cb-8bbcb08f6e4f	Weak application unfortunately, always crashes and stops working. And when I'm travelling, the verification messages don't come quickly.	فوزية بارديسي	##########			0	ar	us		1	ar	weak application unfortunately always crash stop work im travel verification message dont come quickly	Negative	1	1	1
Google Play Store	818ab99a-d207-45b6-b6a1-92831a7cbd10	By God, it's a failed and garbage application.	msz 7000	##########			0	ar	us		1	ar	god fail garbage application	Negative	0	1	0
Google Play Store	15ed4240-ec51-48c7-9383-cbcd624d3439	Very excellent	Osman Ibrahem	##########			0	ar	us		5	ar	excellent	Positive	0	0	0
Google Play Store	da26f912-06ba-4cd7-a1a5-af642e7ae0b8	The leading Wardan application is currently saying that the service is unavailable. You should go to the App Store and check if there is an update available. Once updated, you will experience a wonderful application with the people!	Shad Sdad	##########			0	ar	us		5	ar	lead wardan application currently say service unavailable go app store check update available update experience wonderful application people	Neutral	0	1	0
Google Play Store	a1279883-3d9b-40f4-946a-710461d30b4b	Failed application	مبارك احمد	##########			0	ar	us		1	ar	fail application	Negative	0	1	0
Google Play Store	60445fcd-e87b-478f-9d71-97adbb368047	The service is not available at the moment.	MOHAMED ELSAYED	##########			0	ar	us		1	ar	service available moment	Negative	0	1	0
Google Play Store	5d07fe1e-1a33-4436-8026-8ccf16521e04	What is entered into the application.	Ali Matter	##########			0	ar	us		1	ar	enter application	Neutral	0	1	0
Google Play Store	b92b79e5-a637-4b25-b5cc-ae16e4d5fdf4	Very bad.	Abo Fahd	##########			0	ar	us		1	ar	bad	Negative	1	0	0
Google Play Store	a21409d5-c02e-4ac3-9a4d-fe04b4c3de50	Very bad application and difficult to register.	M. Baqader	##########			0	ar	us		1	ar	bad application difficult register	Negative	1	0	0
Google Play Store	6f92cc34-6c42-4f0d-a7b1-eba5972d0019	Failure, every time I log in it says the service is unavailable.	A'hed MAKIN	##########			13	ar	us		1	ar	failure every time log say service unavailable	Negative	0	1	0
Google Play Store	9daf3566-a242-49bb-b29a-4da8467f6baa	Very, very, very wonderful.	خالد الشريف	2022-03-08 05:49:00			0	ar	us		5	ar	wonderful	Positive	0	0	0
Google Play Store	47e8b5fe-ec69-432f-850c-5b3fc10e1f3d	The bad people bank has advanced while still having a complicated system. Every time I go back to the branch, even the mobile banking doesn't work for me. I go back to the branch and my salary is with them. I used to be their customer and there is a delay in transferring the account from my investment to the current one. It takes 3 or 4 days.	Saudia Arabia	2022-03-08 03:33:00			3	ar	us		1	ar	bad people bank advance still complicate system every time go back branch even mobile bank doesnt work go back branch salary use customer delay transfer account investment current one take days	Negative	1	1	1
Google Play Store	0d92683b-1d2c-431f-b919-6d9a38292d17	Please update the identification information in the application, like other banks.	Abdurhman Abu elhaija	##########			0	ar	us		1	ar	please update identification information application like bank	Neutral	1	1	0
Google Play Store	54889c57-90ae-4800-82c2-4d3f91351add	Upon entering the application, it gives a message that the service is not available.	عبدالعزيز شيب	2022-03-07 08:42:00			5	ar	us		1	ar	upon enter application give message service available	Negative	0	1	0
Google Play Store	3d2a9716-0881-460e-9a05-c3c523d40c85	What is the problem with the AlBilad Bank application? It won't open.	مفرح العسيري	2022-03-07 04:22:00			0	ar	us		1	ar	problem albilad bank application wont open	Negative	0	1	0
Google Play Store	32281aff-1f0c-49cb-8da9-671fa97255d3	When confirming the application for a strong password, if it is claimed that there is repetition of characters, it prevents your registration. Who can convince him that there is no repetition?	قناة لما وسدين	##########			55	ar	us		1	ar	confirm application strong password claim repetition character prevent registration convince repetition	Neutral	0	0	1
Google Play Store	e1b9f1ac-c0b2-4843-b3e1-6acb75b81471	The application used to have its steps in Arabic, but now it has changed to English. Even if you change it back to Arabic, the steps will still remain in English. So, what should someone do if their language skills are limited, and what is the solution?	ابو خالد99	2022-03-06 08:42:00			0	ar	us		1	ar	application use step arabic change english even change back arabic step still remain english someone language skills limit solution	Neutral	1	0	0
Google Play Store	4a60b67d-a944-47ec-ad70-4d02b0386e4f	You need to download a new update for this application.	خالد اليافعي	2022-03-06 07:48:00			0	ar	us		1	ar	need download new update application	Neutral	0	1	0
Google Play Store	f61cd304-4409-4809-af88-ee39c810ca16	Failed	Fm Alsharif	##########			0	ar	us		1	ar	fail	Negative	0	1	0
Google Play Store	1bb375e4-7577-4575-8eab-2438f59d5e2a	Why do you charge fees for local transfers?	ابوعبدالرحمن بدرالدين أحمد الكاهلي	2022-03-05 04:52:00			0	ar	us		1	ar	charge fee local transfer	Neutral	0	1	0
Google Play Store	756d9705-b5dc-4e77-8d9d-a3b85cfd0221	Very excellent ❤	Mohammed ALSHAMMARI	##########			0	ar	us		5	ar	excellent	Positive	0	0	0
Google Play Store	8fb87264-ee60-401a-836e-f5b842ec58b3	Masha Allah, excellent banking services. Thank you.	MOHAMMAD AHMAD	##########			0	ar	us		5	ar	masha allah excellent bank service thank	Positive	0	0	0
Google Play Store	59e156f6-77f5-4180-854f-f88d13068402	Excellent	Rashed Halawah	##########			0	ar	us		4	ar	excellent	Positive	0	0	0
Google Play Store	b1070887-f3a9-4b93-85f6-0ebdece38892	"Like shit"	AHMADO 1410	2022-03-04 09:00:00			0	ar	us		1	ar	like shit	Negative	1	0	0
Google Play Store	68ac9c63-726d-4136-a4cf-deb86f05b62c	The application needs several fixes to reach the level of other banking applications, such as the Al Rajhi and Al Ahli Bank applications, and others.	Sniper	##########			0	ar	us		3	ar	application need several fix reach level bank applications al rajhi al ahli bank applications others	Neutral	0	1	0
Google Play Store	0af54e6a-1bae-4661-8697-0ef0d4ca173b	May God protect him.	ابو نايف خدمات	##########			0	ar	us		5	ar	may god protect	Positive	1	0	0
Google Play Store	033ad4de-fdc0-40ca-b16f-6b0531f6f989	The application is very, very late compared to other banking applications, difficult to use, unclear, disorganized, and not compatible with the versions and updates of Android devices.	mayk127	##########			3	ar	us		1	ar	application late compare bank applications difficult use unclear disorganize compatible versions update android devices	Negative	1	0	0
Google Play Store	46f2f33b-bb36-465b-acbc-0283b32827e5	Update the data; there is no option to send receipts from the application, you dog-like bank, this is a bank for dogs.	bandar asaad	2022-03-03 06:25:00			0	ar	us		1	ar	update data option send receipt application doglike bank bank dog	Negative	1	1	0
Google Play Store	e354e14d-d59d-4cd8-a2a1-20517a01f6ac	I hope Google adds a negative star rating so I can give it to this application.	عبدالرحيم	##########			0	ar	us		1	ar	hope google add negative star rat give application	Negative	1	0	0
Google Play Store	e3be1414-3919-4e97-bf45-58c41de9b82e	Excellent very much	ATEEQ Haitham Saeed AHMED bin Shujaa	##########			0	ar	us		5	ar	excellent much	Positive	0	0	0
Google Play Store	1631e5f1-c95e-4de6-9ca8-c658ab2f480b	I always receive a message saying that the service is not available.	Mohammed Adam	##########			0	ar	us		1	ar	always receive message say service available	Negative	0	1	0
Google Play Store	b58f42e0-a13d-416a-824e-975153170a20	The application is very, very, very bad. It has many errors and frequent crashes. It does not seem like a banking application.	Ahmed Alkhathami	##########			3	ar	us		1	ar	application bad many errors frequent crash seem like bank application	Negative	1	1	1
Google Play Store	17431d00-a8ab-40fe-b8ca-fa0560e15937	I am very happy to join Bank AlBilad. The customer service, whether through telephone banking or visiting their branches, is excellent in their dealings. Bank AlBilad will remain the pride of our country. May Allah bless everyone.	ابو سلطان	##########			0	ar	us		5	ar	happy join bank albilad customer service whether telephone bank visit branch excellent dealings bank albilad remain pride country may allah bless everyone	Positive	1	0	0
Google Play Store	f3a35790-35e4-41a8-a6b6-abc9758084b8	I have a terrible banking application in Saudi Arabia. I swear, I have started thinking about transferring my salary to another bank because of this application. It constantly lags and I have tried it on multiple devices.	T Q	##########			0	ar	us		1	ar	terrible bank application saudi arabia swear start think transfer salary another bank application constantly lag try multiple devices	Negative	1	1	1
Google Play Store	8354ceb6-86bb-463b-b87a-49977da5a802	I tried to access my account using three different mobile devices on different days, and still I'm getting the message "Service temporarily unavailable"!!!! What's the problem?	tv 1day	##########			18	ar	us		1	ar	try access account use three different mobile devices different days still im get message service temporarily unavailable whats problem	Negative	0	1	0
Google Play Store	82b446db-55fa-43a6-84c9-8342ea32655d	Unfortunately, the application does not meet customer service requirements.	أمير القلوب	##########			0	ar	us		1	ar	unfortunately application meet customer service requirements	Negative	1	0	0
Google Play Store	c2315839-7689-4507-8b56-6fcd3b6a594c	The worst application always crashes.	محمد الوايلي	##########			0	ar	us		1	ar	bad application always crash	Negative	1	1	0
Google Play Store	68c03094-442f-4645-9764-9a0e5ed01a39	The problem of frequent malfunctions must be resolved. Additionally, the application does not provide the user with the feature of sending receipts upon executing operations from the same application. Also, adding beneficiaries to it is not easy.	abdulmohsen alsubaie	##########			23	ar	us		2	ar	problem frequent malfunction must resolve additionally application provide user feature send receipt upon execute operations application also add beneficiaries easy	Negative	0	1	0
Google Play Store	5c3cdc5b-e673-4079-85a6-3745a276d571	If there were fewer than a star, I wouldn't have hesitated for a moment to apply a very bad application. I entered my data and it is not how a bank application should be like!! Unfortunately, a bad experience.	Iqab Almalki	##########			27	ar	us		1	ar	few star wouldnt hesitate moment apply bad application enter data bank application like unfortunately bad experience	Negative	1	0	0
Google Play Store	4f882c2a-a132-4ed2-9551-22e043cebde0	My excellent bank	منصور البقمي	##########			0	ar	us		5	ar	excellent bank	Positive	0	0	0
Google Play Store	33db4bcd-c8a4-4c70-8b14-f9ed4cb2c0da	Very bad and slow, I wish they would take care of it like the rest of the banks.	Mogbil	##########			0	ar	us		1	ar	bad slow wish would take care like rest bank	Negative	1	0	1
Google Play Store	b70c47ce-c4ca-49e1-b4fd-ffe3c4f0c676	The application hasn't been working for a while, I have tried everything, even deleting and reinstalling it, but it is still not working.	ام نوره	##########			0	ar	us		1	ar	application hasnt work try everything even delete reinstall still work	Negative	0	1	0
Google Play Store	5188d6c0-4219-4afb-b8f7-4e4f4c1439ee	Very very bad	SAD SAD SAD	##########			0	ar	us		1	ar	bad	Negative	1	0	0
Google Play Store	7de3142e-23fe-4dfc-87f1-922a3758122f	Application of the country 100%	برق رعد صاعقة طيارة حربية مدرعة مرعبة 100%	##########			0	ar	us		5	ar	application country	Neutral	1	0	0
Google Play Store	2cdfe5ef-b5ea-4153-8b92-646f449db2c6	Very fantastic and organized.	هنادي الحربي	##########			0	ar	us		4	ar	fantastic organize	Positive	0	0	0
Google Play Store	4d63884f-4f14-4877-9ca4-b0ff20e7c73f	As soon as I applied for an exit visa, they suspended my account (banned by Nazeer).	Moath M. Qaisiyah	##########			0	ar	us		1	ar	soon apply exit visa suspend account ban nazeer	Negative	0	1	0
Google Play Store	0abdc500-6cf1-41a5-90cd-39389deed0c9	bad	محمد عيسى	##########			0	ar	us		1	ar	bad	Negative	1	0	0
Google Play Store	15ded4ed-f3eb-47d9-a607-28b7c3229991	The application is bad, doesn't work, and not even worth a star.	ابو أسامة عسيري	##########			1	ar	us		1	ar	application bad doesnt work even worth star	Negative	1	1	0
Google Play Store	3275a98b-4605-41ac-baf6-ed99f81fbfda	The application is not working.	محمد كريري	##########			0	ar	us		1	ar	application work	Negative	0	1	0
Google Play Store	606f0192-54a8-4e08-9876-e7e88035a877	Very beautiful ❤️❤️	وٌعٌجّبًيَ يَآزٍمًنِ	##########			0	ar	us		5	ar	beautiful	Positive	0	0	0
Google Play Store	aa5b3d9a-aeaa-4b37-9e63-d519f7fcc5ef	Very, very bad... The app is down. What kind of bank or plumbing shop is this?	سالم القحطاني	##########			2	ar	us		1	ar	bad app kind bank plumb shop	Negative	1	0	0
Google Play Store	43dc23b0-bf07-4476-9dc9-045fb8d3d1ce	The application is not working!	the Migrant المهاجر	##########			0	ar	us		1	ar	application work	Negative	0	1	0
Google Play Store	cd89d491-eeb1-4006-a5a4-f9e2e75085fc	Excellent very much.	ابو وليد	##########			0	ar	us		5	ar	excellent much	Positive	0	0	0
Google Play Store	92e56757-56fe-4860-8867-4700ab85ee09	One is made of clay and one is made of dough, and no one will answer you.	ابو كِنان	##########			2	ar	us		1	ar	one make clay one make dough one answer	Neutral	1	0	0
Google Play Store	6c7bd639-8a68-40c6-a4a0-8c5584145347	Excellent and outstanding	مشعل السبيعي	##########			0	ar	us		5	ar	excellent outstanding	Positive	0	0	0
Google Play Store	5456e92a-2753-4f05-83cc-362e5c007ff8	Beautiful.	عادل القحطاني	##########			0	ar	us		5	ar	beautiful	Positive	0	0	0
Google Play Store	894027b3-e892-443f-9076-2ce64cbc1309	Comfortable and service-oriented bank.	khalid gamea	##########			0	ar	us		4	ar	comfortable serviceoriented bank	Positive	1	0	0
Google Play Store	51d722da-6d35-45c9-bd1c-57a09b7b6e91	The best bank to deal with is Al Baraka Bank.	خرساني عامر	##########			0	ar	us		1	ar	best bank deal al baraka bank	Positive	0	0	0
Google Play Store	bfc49550-07be-47cb-a492-6941c780597d	Very excellent	ام امتنان	##########			0	ar	us		5	ar	excellent	Positive	0	0	0
Google Play Store	c9cf9cab-6d68-42ac-b418-76dc441a5e50	After the latest update, the application does not open. You have to delete it and reinstall it again.	Omar Ali	##########			0	ar	us		5	ar	late update application open delete reinstall	Negative	0	1	0
Google Play Store	7893bf5a-fa46-4828-a1e9-457ca672e094	Outstanding	MOHAMED AZIZ	##########			0	ar	us		5	ar	outstanding	Positive	0	0	0
Google Play Store	368ce986-41d1-4fee-a4a5-387515da05c0	Masha Allah, very beautiful. May Allah make your final resting place in Jannah (Paradise).	Ahmed Saudi	##########			0	ar	us		5	ar	masha allah beautiful may allah make final rest place jannah paradise	Positive	1	0	0
Google Play Store	7f83dd16-f860-4a75-8e5f-6866616957bf	Very difficult.	Basheer Salamah	##########			0	ar	us		1	ar	difficult	Negative	1	0	0
Google Play Store	ee30bb40-2690-4c5d-a351-24806fdc4760	There was a problem with the update, and now it is working.	محمد كمال	##########			0	ar	us		1	ar	problem update work	Neutral	0	1	0
Google Play Store	3452d9dd-2202-482e-9ff6-bf9dbd90d8b1	The application stopped working for several days, then it started working very well, allowing you to complete most of your tasks without visiting the branch.	عبدالمحسن الفوزان	##########			8	ar	us		5	ar	application stop work several days start work well allow complete task without visit branch	Positive	0	1	0
Google Play Store	80d1d884-db63-452d-b4ad-d73bbac436dd	The most beautiful bank in Saudi Arabia.	صلاح الدين النجم	##########			0	ar	us		5	ar	beautiful bank saudi arabia	Positive	0	0	0
Google Play Store	cbb1443f-da50-4046-aa02-708f2662afd3	This application needs a lot of modifications and improvements. What is meant by username and password? I couldn't enter the national ID number correctly, and when I tried to enter the ATM card number, it also gave me an error. The application is not intuitive.	ابو علي	##########			0	ar	us		1	ar	application need lot modifications improvements mean username password couldnt enter national id number correctly try enter atm card number also give error application intuitive	Negative	1	1	0
Google Play Store	08239283-3ad7-4925-8f08-62ab7453464e	You are right.	زياد مكرمي	##########			0	ar	us		5	ar	right	Neutral	0	0	0
Google Play Store	9bb9b9e4-6046-48bb-91ef-3f5f58e4b0a4	Unfortunately, my country's bank needs managers and thinkers to elevate the bank and develop ideas and programs because we are in the 21st century, and you still ask the customer to visit the branch, while most banks handle their transactions online.	محمد Мухаммад	##########			0	ar	us		2	ar	unfortunately countrys bank need managers thinkers elevate bank develop ideas program st century still ask customer visit branch bank handle transactions online	Negative	1	0	0
Google Play Store	89445379-488d-498b-a3d4-c64cf1932625	Excellent	عبدالله النوفي	##########			0	ar	us		5	ar	excellent	Positive	0	0	0
Google Play Store	fcf69986-879b-4901-9a03-5fb16e46f96f	Very successful application in terms of dealing and ease of accomplishment. Good luck and keep going.	Essam Ail	##########			2	ar	us		5	ar	successful application term deal ease accomplishment good luck keep go	Positive	1	0	0
Google Play Store	735a8f9c-9407-476b-a0f5-8b605b3807fa	The most beautiful bank in life.	نوني عيوني	##########			0	ar	us		5	ar	beautiful bank life	Positive	0	0	0
Google Play Store	6c6d6855-e337-4ff6-8548-13e645bbc314	Excellent application 👍	أخوكم احمد	##########			0	ar	us		4	ar	excellent application	Positive	0	0	0
Google Play Store	cca66d26-042c-44b4-8c4a-66311d0e23a4	Excellent very very very.	أزهر محمد خبان	##########			0	ar	us		5	ar	excellent	Positive	0	0	0
Google Play Store	e9fd4494-960d-4884-9c4b-877123aedcaf	An easy-to-use application, it has the wonderful feature of automatically recording the verification code.	محمد العبداللطيف	##########			0	ar	us		5	ar	easytouse application wonderful feature automatically record verification code	Positive	0	1	0
Google Play Store	3ccb29ce-5f1c-44ac-9f9e-6e7f3adb83be	Excellent	حمد العنزي	##########			0	ar	us		5	ar	excellent	Positive	0	0	0
Google Play Store	3f4cccf7-d837-434f-a797-e00ae3fb94a3	Excellent and strong protection, thank you.	فهد الحرازي اليماني	##########			0	ar	us		5	ar	excellent strong protection thank	Positive	0	0	0
Google Play Store	b66ff3cf-67ae-4261-8981-07741df6c619	The application does not include a service for adding a beneficiary via mobile number or barcode. The application does not include a service for saving and automatically filling in the password. The application does not display the full name of the added beneficiary before or after adding them, in order to avoid any mistakes.	، ،	##########			6	ar	us		2	ar	application include service add beneficiary via mobile number barcode application include service save automatically fill password application display full name add beneficiary add order avoid mistake	Neutral	0	1	0
Google Play Store	440c3d6d-d10d-45b3-9e5b-0f1caa461575	The application does not open despite my many attempts at different times.	ahmad mo	2022-02-09 08:36:00			1	ar	us		1	ar	application open despite many attempt different time	Negative	0	1	0
Google Play Store	4aa27669-9bf2-40e7-b497-c81eac170fbb	The download is not completed.	دقات قلبي	##########			0	ar	us		3	ar	download complete	Neutral	0	1	0
Google Play Store	bd0a1efa-b001-4b7f-8e55-035bfb4f3692	Excellent, but sometimes it refuses to open. I'm not sure what the problem is.	Alqhtani CD_Q5	##########			0	ar	us		3	ar	excellent sometimes refuse open im sure problem	Negative	1	1	0
Google Play Store	97ee0823-3b7a-4ad1-be70-33e2b64997d8	The application has become garbage, with many errors and getting kicked out of the application 💦	Thunder way	##########			1	ar	us		1	ar	application become garbage many errors get kick application	Negative	0	1	0
Google Play Store	12448c0d-6da7-45fd-9598-24178b78dbab	I have tried more than 4 times to enter my data on the application, but in the end it tells me there is an error.	DR Abdelrahman	##########			0	ar	us		1	ar	try time enter data application end tell error	Negative	0	1	0
Google Play Store	bd26ba15-540b-4138-85ae-23d00b993287	The application is not working, what is going on with it? It has been off for our convenience for days.	sami albalawi	##########			0	ar	us		1	ar	application work go convenience days	Negative	0	1	0
Google Play Store	5a8a0330-13a2-4113-950b-2b8de9023266	The heaviest application related to banks.	S Tamammi	##########			0	ar	us		1	ar	heavy application relate bank	Neutral	1	0	1
Google Play Store	f008c7de-10e3-4ed7-8b19-6527c9b38e64	I am trying to open an application but it is not opening. It gets stuck. Please respond.	Mohammed	2022-02-04 06:06:00			3	ar	us		5	ar	try open application open get stick please respond	Negative	0	1	1
Google Play Store	7004fa0f-e9ab-4923-838e-bbfbb3621176	Excellent and fast application	ابوشهد نوح	2022-02-04 02:49:00			0	ar	us		5	ar	excellent fast application	Positive	0	0	0
Google Play Store	cab602c2-3dc3-4e54-8af1-d4325cbe71a9	Beautiful.	YAHYA AL MORAYA	2022-02-03 01:34:00			0	ar	us		5	ar	beautiful	Positive	0	0	0
Google Play Store	eefe750d-2e04-43b5-94a4-a0f810a2ba14	Excellent, and completely safe.	abo-adwa algamdi	##########			0	ar	us		5	ar	excellent completely safe	Positive	0	0	0
Google Play Store	e328524f-df3e-4cfb-b90f-39fa24da6c72	Very beautiful.	Mohmed Ahmed okasha	2022-02-02 05:44:00			0	ar	us		5	ar	beautiful	Positive	0	0	0
Google Play Store	7c2e8687-de64-4b8b-b2ba-8a5791e814e1	It does not open.	وافي الفاضل	##########			0	ar	us		1	ar	open	Neutral	0	1	0
Google Play Store	3dfd7327-11c9-4322-af2c-0afdba15203b	Very wonderful	ميمونه الأنصاري	2022-02-01 08:16:00			0	ar	us		5	ar	wonderful	Positive	0	0	0
Google Play Store	d534b775-704a-44d7-9a71-97349464a303	Wonderful	مصطفى شندي	2022-02-01 04:37:00			0	ar	us		5	ar	wonderful	Positive	0	0	0
Google Play Store	3107ccc4-7c76-45c4-aa13-60033edaefda	Very bad.	حسن عسيري	##########			0	ar	us		1	ar	bad	Negative	1	0	0
Google Play Store	ae9a3a6b-83c9-47a7-8fc0-7ff7789d421f	"The application is not working properly. We want to benefit from the bank. Does it not work on some mobile devices?"	محمد العيسوى	##########			0	ar	us		1	ar	application work properly want benefit bank work mobile devices	Negative	0	1	0
Google Play Store	01a21e54-41e7-4473-8ed6-7a3bc3b0697d	This program is awful, it's not worth even half a star.	ناصر الحربي ناصر الحربي	##########			1	ar	us		1	ar	program awful worth even half star	Negative	1	0	0
Google Play Store	a1524294-848f-4ab2-8f57-ad38c55df3d3	It doesn't work. It gives me an error message.	mahmoud younes	##########			1	ar	us		1	ar	doesnt work give error message	Negative	0	1	0
Google Play Store	4511cb63-3341-4e16-8bf1-8f6e366d57b6	Fine.	محمد ناظك	##########			0	ar	us		5	ar	fine	Positive	0	0	0
Google Play Store	df8cbcd9-c003-480a-8e92-4ffcd095c8d4	"The worst application in terms of payment speed, especially during salary time, it does not work at all."	ابوعبدالعزيز القحطاني	##########			0	ar	us		1	ar	bad application term payment speed especially salary time work	Negative	1	1	0
Google Play Store	710513f7-c091-48dc-9206-633dbd4e6475	It malfunctions a lot.	ابو لمى الغامدي	##########			0	ar	us		1	ar	malfunction lot	Negative	0	1	0
Google Play Store	f4422612-ac00-4cb4-a3f5-c1dae3ef021e	"When I saw the comments, I stopped downloading the application. ☹"	يارب رضاك والجنه لاحول ولاقوة الابالله	##########			0	ar	us		1	ar	saw comment stop download application	Negative	0	1	0
Google Play Store	06c74ab2-243d-441d-9039-03816e8eed43	Why is the application weak and saying there is no internet? People want to transfer and receive, what is the problem, Bank Al Bilad? Please solve it.	Shogie Algomaie	##########			2	ar	us		1	ar	application weak say internet people want transfer receive problem bank al bilad please solve	Negative	1	1	0
Google Play Store	3fe12d73-ece4-4eb0-a004-6b6f91bab226	Good.	مدالله النفيعي	##########			0	ar	us		1	ar	good	Positive	0	0	0
Google Play Store	75b46940-f6b7-48be-bb39-d6ef5fcffd26	Beep	سالم السويدي	##########			0	ar	us		4	ar	beep	Neutral	0	0	0
Google Play Store	edcd23c8-0a68-4c21-a016-2c9c21833778	I have Wi-Fi and my data is working fine, but the application won't open and it says there is no internet connection. This application is not suitable for Bank Al-Bilad; it should be a fast-responsive application.	محمد حسن	##########			21	ar	us		1	ar	wifi data work fine application wont open say internet connection application suitable bank albilad fastresponsive application	Negative	0	1	0
Google Play Store	9edd459d-cc6a-4a58-bf18-29e02a7eaae5	There is a problem, the application does not open.	الحمد لله	##########			0	ar	us		1	ar	problem application open	Negative	0	1	0
Google Play Store	479760dd-73b3-47bc-a7b1-fa842bf1c72f	He works, but slowly...	يعقوب التركي	##########			0	ar	us		3	ar	work slowly	Neutral	0	0	1
Google Play Store	5009350e-e295-4330-92ad-cd460bbd50f3	AND	سعود العتيبي	##########			0	ar	us		5	ar		Neutral	0	0	0
Google Play Store	eb2d8400-b8db-443a-8756-720f9f6b00c0	The application is not working. Please solve the problem. We have to access through the website of Al-Balad Net.	الأدهم	##########			3	ar	us		1	ar	application work please solve problem access website albalad net	Negative	0	1	0
Google Play Store	89e34e66-acf1-4440-af5c-1676c979bd4e	The best application and the best Bank Al Ahli, Al Ahli, Al Ahli. They disappointed me for three days while I was registering in the country, and in the end, they refused.	محمد محمد	##########			0	ar	us		1	ar	best application best bank al ahli al ahli al ahli disappoint three days register country end refuse	Negative	1	0	0
Google Play Store	a001743f-6788-462d-af83-11f1200f22b0	Worst program ever, zero rating.	Revan mohammed	##########			1	ar	us		1	ar	bad program ever zero rat	Negative	1	0	0
Google Play Store	f7c0942d-9aa2-4e30-9f70-07505504d7fe	Good	عيونك آخر آمالي	##########			0	ar	us		5	ar	good	Positive	0	0	0
Google Play Store	76d2c042-4eb5-4029-80e8-204bc1aea1b6	Excellent, fast, and working perfectly! And a trustworthy bank that deserves 100 stars.	قنات نجوم اليمن 100	##########			4	ar	us		5	ar	excellent fast work perfectly trustworthy bank deserve star	Positive	0	0	0
Google Play Store	6f55d04c-29c2-432c-a510-c86247e1da03	Excellent.	فارس الاحلام	##########			0	ar	us		5	ar	excellent	Positive	0	0	0
Google Play Store	31d67521-27c8-42b6-9f97-fb8697020e06	Every time I register in it, I just exit the program. I need to register again. Each time is very bad.	تذكار	##########			18	ar	us		1	ar	every time register exit program need register time bad	Negative	1	1	0
Google Play Store	065e9aa2-9eb3-4211-8047-51595970124a	No thanks to those responsible.	عالم الحضارة	##########			0	ar	us		1	ar	thank responsible	Negative	0	0	0
Google Play Store	b4350dc8-b788-4bc5-bd68-30137a2935f0	Excellent	Alaa Rashid	##########			0	ar	us		5	ar	excellent	Positive	0	0	0
Google Play Store	60adbff8-547c-427d-89cf-e823046b9656	The application is not smooth and modern, and it lacks many things, such as updating the account.	mohammed lardhi	##########			1	ar	us		2	ar	application smooth modern lack many things update account	Negative	1	1	0
Google Play Store	470e4573-f5d2-4cb4-acc2-c330c1138383	The best bank, may God welcome you.	Ahmed Younes	##########			0	ar	us		5	ar	best bank may god welcome	Positive	0	0	0
Google Play Store	4b32c501-7907-4fd4-92b9-c0cbaa70293d	Splendor	FAISAL ABDULKAREEM	##########			0	ar	us		5	ar	splendor	Positive	0	0	0
Google Play Store	425c059a-04ff-4ebf-adbe-dcad3a4acab9	The application is not working.	بندر العتيبي	##########			0	ar	us		1	ar	application work	Negative	0	1	0
Google Play Store	23495e70-13c5-4b04-aff5-27a1bf6f2442	The program is not working. Please update the program.	من همومي تقهويت	##########			0	ar	us		1	ar	program work please update program	Negative	0	1	0
Google Play Store	c1f196e6-3999-4bea-b8cc-896fb65aac9e	It does not work on an Android device.	Nashwan Al-khalqi	##########			0	ar	us		1	ar	work android device	Negative	0	1	0
Google Play Store	3180c444-9075-4e40-a3b4-e5246feef389	The application has stopped and is not working. Is there a problem with it?	Turki Abdallh	##########			0	ar	us		1	ar	application stop work problem	Negative	0	1	0
Google Play Store	731bff3e-eb18-4b90-a86f-d0f150f176da	Bad, the worst banking application	ABDULRAHMAN 96	##########			0	ar	us		1	ar	bad bad bank application	Negative	1	0	0
Google Play Store	671489b2-1b67-493e-b816-049bf1763290	The application is not working.	محمد الشيخ	##########			0	ar	us		1	ar	application work	Negative	0	1	0
Google Play Store	d99db36f-6f56-4282-98bf-d51b14af4d74	The niceest experience.	يحي محمد	##########			0	ar	us		5	ar	nice experience	Positive	0	0	0
Google Play Store	240220e8-5255-48a5-9bf2-fd9e482aa23b	We should work on a convenient and better application for the customer. The application should be user-friendly. We hope that the management will work on a better and easier application. Thank you.	تركي القيسي	##########			3	ar	us		4	ar	work convenient good application customer application userfriendly hope management work good easy application thank	Positive	1	0	0
Google Play Store	cf8ded26-cd19-4b82-800d-59d78c82e65c	Excellent	تركي الرويلي	##########			0	ar	us		5	ar	excellent	Positive	0	0	0
Google Play Store	451d2b4e-d73d-4170-908f-35f91d2e53e7	Excellent very very	محمدمحمد هاشم المغربي	##########			0	ar	us		5	ar	excellent	Positive	0	0	0
Google Play Store	06adfaea-aca0-433f-967f-92cf9a49cf83	Feeling alright, sometimes gets stuck.	أبونبيل الحارثي	##########			0	ar	us		3	ar	feel alright sometimes get stick	Neutral	1	0	1
Google Play Store	bfa10848-88a0-48e0-9f34-10ef25edd66b	Complex and inflexible application	Tawfik AL-yazeady	##########			0	ar	us		1	ar	complex inflexible application	Neutral	1	0	0
Google Play Store	d95bfb59-181b-40eb-ade4-8f412a5be699	Very bad application and does not work after the latest update.	Sherif Ahmed	##########			0	ar	us		1	ar	bad application work late update	Negative	1	1	0
Google Play Store	4a1f4d81-b6e7-477f-a506-f59d7d4f90c7	The application does not open, unfortunately.	Ea Ea	##########			0	ar	us		1	ar	application open unfortunately	Negative	0	1	0
Google Play Store	78cf5894-0fbd-418d-a08e-4085acb6fd01	It is not working, and is it reasonable to change to a new device for the application to work?	Majdy Hashem	##########			0	ar	us		1	ar	work reasonable change new device application work	Negative	0	1	0
Google Play Store	bb54a443-cdaf-4c61-a3dd-2c7a9f929fd3	The application doesn't open, give us the solution.	عبدالله على	##########			0	ar	us		1	ar	application doesnt open give us solution	Negative	0	1	0
Google Play Store	05eb2bb3-37ed-4690-be0d-c9c2a5e11ae3	The application is not working, what is the solution?	محمد الزهراني	##########			0	ar	us		1	ar	application work solution	Negative	0	1	0
Google Play Store	c1ce3c75-7325-4922-917d-c974e47f31bf	The application is not functioning after the new update. Please solve the problem.	حسن عواف	##########			0	ar	us		1	ar	application function new update please solve problem	Negative	0	1	0
Google Play Store	5e978ded-153c-4a93-be7e-be4b7629960f	nice	Anas Ashraf	##########			0	ar	us		5	ar	nice	Positive	0	0	0
Google Play Store	8767c7a8-c49d-4284-b643-068a84738423	Not good, I transferred my salary to them and regretted it. Now I have requested termination of contract, a week's notice has been delayed, and the problem has not been resolved despite repeatedly contacting them.	AA A	##########			0	ar	us		1	ar	good transfer salary regret request termination contract weeks notice delay problem resolve despite repeatedly contact	Negative	1	1	0
Google Play Store	60bd8742-c1c5-4106-a80a-8177112d1753	The application does not share the operational photos when selecting the share option. It exits the application.	Firas Yasser	##########			0	ar	us		1	ar	application share operational photos select share option exit application	Neutral	0	1	0
Google Play Store	293ecf0e-7094-4782-8a20-73b29094b56e	The application is not working!!!	Fahad Alhamidi	2022-01-09 06:26:00			0	ar	us		1	ar	application work	Negative	0	1	0
Google Play Store	b9aa6f92-0101-4be2-acb3-49617b01941c	The application is not working.	poet poet	##########			0	ar	us		1	ar	application work	Negative	0	1	0
Google Play Store	36ea2bf6-d8e9-4069-bf64-1146226a8f79	It doesn't open.	تبسيط العلوم الشرعية	##########			0	ar	us		1	ar	doesnt open	Neutral	0	1	0
Google Play Store	ae0ac102-0ec3-4265-8717-23855e521fc0	Splendor	احمد بن علي الشريفي	##########			0	ar	us		5	ar	splendor	Positive	0	0	0
Google Play Store	ce8820a4-9db3-4238-a90c-730e7b56b69c	Very very very bad update. It's ruined.	رائد عبدالله الشهراني	2022-01-07 02:54:00			0	ar	us		1	ar	bad update ruin	Negative	1	0	0
Google Play Store	41f3b4b5-a6cb-4dd7-aefe-8c7667d2d3c6	It doesn't open.	Ahmed Khaled	##########			0	ar	us		1	ar	doesnt open	Neutral	0	1	0
Google Play Store	aacbdf1a-44d4-440b-ba90-aaa8c2a379a0	Old and not clear	M. Saad	##########			1	ar	us		1	ar	old clear	Negative	1	0	0
Google Play Store	4da1bedf-18a4-4c3e-b09c-3ac4c72609c1	The application does not open, find a solution for us, it's really a lot, by God.	Ismat Idrees	##########			1	ar	us		1	ar	application open find solution us really lot god	Negative	1	0	0
Google Play Store	17805319-c61b-4caa-949b-0f814ea28065	Excellent bank, excellent service. Thank you very much, respectable bank.	علي محمد	##########			0	ar	us		5	ar	excellent bank excellent service thank much respectable bank	Positive	0	0	0
Google Play Store	d73e3b9d-33f0-46b4-a365-9a29420386dd	The application is not working.	hassnn elbandarawy	##########			1	ar	us		1	ar	application work	Negative	0	1	0
Google Play Store	3d673ce4-41d6-4b1f-bd67-94b2247b6a29	The application is not working. What is this? How can a big bank like Al-Balad have this happening? What kind of negligence is this?	A.O Mohammed	##########			0	ar	us		1	ar	application work big bank like albalad happen kind negligence	Negative	1	1	0
Google Play Store	f336a840-070e-40be-b548-60dd0a06688d	Very good	هلالي والراس عالي ابوعلي الحارثي	##########			0	ar	us		5	ar	good	Positive	0	0	0
Google Play Store	59ec6a2a-fa6a-414f-87fa-2850a65991cf	Very bad, it doesn't open for me when I enter.	حسن بن شموس الهذلي	##########			0	ar	us		1	ar	bad doesnt open enter	Negative	1	1	0
Google Play Store	236ed23d-8d0e-483a-9ba0-b099719e1399	Why is the application not working?	Ahmed Abdelbaset	2022-01-05 07:47:00			1	ar	us		3	ar	application work	Negative	0	1	0
Google Play Store	e96dccb1-f5e4-491a-b786-3184f9a1369c	An excellent program, very very much.	fahad fahad	##########			0	ar	us		4	ar	excellent program much	Positive	0	0	0
Google Play Store	a8a7808b-38d0-4d83-918e-caadd762f717	The application is not working on my Samsung Note 9 phone.	JAÂFAR# MARROCE	##########			0	ar	us		1	ar	application work samsung note phone	Negative	0	1	0
Google Play Store	6a214d5e-df69-4019-b459-c90cca8845cd	I want a solution, why isn't the application opening? What is the reason?	Salha Al.shahrani	##########			0	ar	us		1	ar	want solution isnt application open reason	Negative	0	1	0
Google Play Store	02c7b36f-c66e-48e7-a2f5-af8f207a4ba5	The application is not working.	ابن حسين	##########			1	ar	us		1	ar	application work	Negative	0	1	0
Google Play Store	ab55a99e-8017-4cf2-a86c-b611bfbef90c	The application is not working.	Turkey alrashed	##########			0	ar	us		1	ar	application work	Negative	0	1	0
Google Play Store	f1f5a5a4-72df-495b-b247-2719c3ba839e	The application is not working, constantly giving an error.	Tamer Elgammal	##########			1	ar	us		1	ar	application work constantly give error	Negative	0	1	0
Google Play Store	414a1f5b-607a-4248-a83c-257001a2f11a	The application is good, but it hangs a lot.	سبحان الله وبحمده	##########			1	ar	us		3	ar	application good hang lot	Neutral	1	0	1
Google Play Store	ec5159c9-e377-4a39-9598-cbd906d3cce4	The new update is not suitable.	Helmi Abdo Ghaleb	##########			1	ar	us		5	ar	new update suitable	Negative	1	0	0
Google Play Store	f2e51549-a2b7-490b-ae5d-872671f9d6bd	Thank you.	محمد العتيبي	##########			0	ar	us		5	ar	thank	Positive	0	0	0
Google Play Store	11596708-3960-46f2-a24f-fcd26b2cc486	It doesn't work.	كوكتيل متجر منوش	##########			0	ar	us		2	ar	doesnt work	Negative	0	1	0
Google Play Store	2f80a91d-c9c1-4c45-b3be-aefc14555381	He always says send feedback but doesn't take action.	محمد حمدي قوره	2022-01-02 00:25:00			1	ar	us		1	ar	always say send feedback doesnt take action	Negative	1	0	0
Google Play Store	ebd915bf-7fd1-471b-91a7-99590101029a	"Why isn't the application stable?"	Ufhfhr Bdhfhf	2022-01-02 00:07:00			0	ar	us		4	ar	isnt application stable	Negative	1	0	0
Google Play Store	0735929f-efab-4258-a004-6e3d3e85fb02	The application does not work at all.	محمد ألاحياوي	##########			0	ar	us		1	ar	application work	Negative	0	1	0
Google Play Store	21e8d4bc-5463-49b0-90ae-a33326d321f0	After the latest final update, it does not work!!!!!!	Rλśђa αlнαRвι	##########			0	ar	us		5	ar	late final update work	Negative	0	1	0
Google Play Store	ea11a552-9f1b-4498-abee-9db08bd82da7	Wonderful.	Tariq A.I	2022-01-01 08:20:00			0	ar	us		5	ar	wonderful	Positive	0	0	0
Google Play Store	2c39392f-dc49-42d2-9920-a9ecc8643092	The application is not working for me and has been stopped for more than a month.	عبدالهادي البقلاوي	2022-01-01 08:17:00			1	ar	us		1	ar	application work stop month	Negative	0	1	0
Google Play Store	1867a395-125d-45a8-87e8-b55acbb9b87b	Haha	عبدالرحمن عبدالله	2022-01-01 00:49:00			0	ar	us		5	ar	haha	Positive	0	0	0
Google Play Store	b5ea8f2a-f3ba-437c-81e4-1a50daa01cdc	dsfdsf	الله اكبر	##########			0	ar	us		5	fa	dsfdsf	Neutral	0	0	0
Google Play Store	95230f79-b89e-4f98-9ac3-6aa486abd9b6	Mintaz	موسى الزهراني	##########			0	ar	us		5	fa	mintaz	Neutral	1	0	0
Google Play Store	a3cee644-bfb9-4011-810d-58fa4eb9c973	Strength	احمددبوان ناجي على	##########			0	ar	us		4	fa	strength	Positive	0	0	0
Google Play Store	741eec8e-00bb-4c4c-aa0d-c594e5d66ea9	Ff	ALi ALSHEHRI	##########			0	ar	us		1	fa	ff	Neutral	0	0	0
Google Play Store	bb00581a-de22-40dc-b306-2ae9601de067	Body	حموتشي السلولي	2022-09-01 01:37:00			0	ar	us		5	fa	body	Neutral	0	0	0
Google Play Store	8d8c1a92-c876-4271-807d-f8412f9a6b73	Mantaaz	Gh Gh	##########			0	ar	us		5	fa	mantaaz	Neutral	1	0	0
Google Play Store	2d2734b1-4c7a-4812-ac1f-f41bf4719306	Excellent	علي عسيري	2022-05-01 07:31:00			0	ar	us		5	fa	excellent	Positive	0	0	0
Google Play Store	aa754bd6-9c01-4312-9837-0c3707ba02ed	Excellent excellent	محمد باطوق	##########			0	ar	us		5	fa	excellent excellent	Positive	0	0	0
Google Play Store	b5f8a1ca-df55-46ba-8e50-d02117b014af	Excellent excellent	عبدالله الشفق الخطيب الخطيب	##########			0	ar	us		5	fa	excellent excellent	Positive	0	0	0
Google Play Store	f1ca6278-5b47-4a4e-860d-d6946c7c41eb	Excellent	حمدى فتحى	2022-01-08 06:11:00			0	ar	us		4	fa	excellent	Positive	0	0	0
Google Play Store	87397fda-1336-4755-a3fb-4eb56a35b391	And you.	hussein moussa	##########			0	ar	us		4	pam		Neutral	0	0	0
Google Play Store	faf6113b-6c65-40fa-872e-ec1838b8b908	"Sh*t"	كشر KSR	##########			0	ar	us		1	pam	sht	Neutral	0	1	0
Google Play Store	a9750cd8-8d9d-44dc-9c46-cdc8c931c59d	Excellent	Ali Ali	2022-01-03 04:06:00			0	en	us		5	ur	excellent	Positive	0	0	0
Google Play Store	dbe778b6-ac5c-413d-a7e3-f513725300db	Excellent	سلطان حكمي	##########			0	ar	us		5	ur	excellent	Positive	0	0	0
Google Play Store	21854e98-2ec1-46d5-8653-fd103cce84ff	Excellent	عبودي الحربي	##########			0	ar	us		5	ur	excellent	Positive	0	0	0
Google Play Store	5401fa62-2796-4b8e-9323-7322ca62831e	Okay / Good / Fine	Osman Mohammad Ibrahim Ouri	##########			0	ar	us		5	ur	okay good fine	Positive	0	0	0
Google Play Store	a06e3465-c461-4d88-b0bf-bb75fa70c03e	Excellent	القلب المجروح	##########			0	ar	us		5	ur	excellent	Positive	0	0	0
Google Play Store	be82d1a5-435e-4566-ab8b-b31fa5dcadc0	Excellent	شاعر المشاعر	##########			0	ar	us		5	ur	excellent	Positive	0	0	0
Google Play Store	48345bcc-d796-47a2-a982-135ac49f8dba	Excellent	احمد رزق	##########			0	ar	us		5	ur	excellent	Positive	0	0	0
Google Play Store	08419f82-fefd-4724-8a78-57be648bf52c	Excellent	إسماعيل ثابت الشاعر	##########			0	ar	us		5	ur	excellent	Positive	0	0	0
Google Play Store	974d6977-7f1a-4e8c-a2db-548513c32ad9	Okay	husein muhammad	##########			0	ar	us		5	ur	okay	Positive	0	0	0
Google Play Store	74b07a04-b9a5-47d8-b424-effb638dd5a9	Excellent	احمد موسي	##########			0	ar	us		5	ur	excellent	Positive	0	0	0
Google Play Store	4f45d630-125b-4277-afec-9dffccfea26c	Excellent	خالد Fg	##########			0	ar	us		5	ur	excellent	Positive	0	0	0
Google Play Store	c0e8b2ff-779c-4c00-9b75-487541d40d4e	Excellent	Pd Eh	2023-05-08 07:06:00			0	ar	us		5	ur	excellent	Positive	0	0	0
Google Play Store	79af1ced-3c29-492e-aa2d-1a0488bc6ead	Excellent	الزير	2023-05-05 06:02:00			0	ar	us		5	ur	excellent	Positive	0	0	0
Google Play Store	6dfc3c15-eb89-46c8-92b2-f9c1ca5443d3	Excellent	احمد جوده	##########			0	ar	us		5	ur	excellent	Positive	0	0	0
Google Play Store	f38de395-018c-404b-9d46-9e08a9e81f89	Excellent	عصام عماد	##########			0	ar	us		5	ur	excellent	Positive	0	0	0
Google Play Store	118e598a-134a-4043-b8f6-8a8ea1de5f7a	Excellent	حسن مكين	##########			0	ar	us		5	ur	excellent	Positive	0	0	0
Google Play Store	1adc8489-1d57-4660-a06d-f2a807dcf9ad	Excellent	عبده عبدالحليم	##########			0	ar	us		5	ur	excellent	Positive	0	0	0
Google Play Store	d8986e5b-006f-4478-8c88-21f124e1a115	Excellent	Mstr S	##########			0	ar	us		5	ur	excellent	Positive	0	0	0
Google Play Store	c19aa20b-bf78-453e-a749-53dc772bf8da	Excellent	عمرو عصام	##########			0	ar	us		5	ur	excellent	Positive	0	0	0
Google Play Store	b1f5cef3-652e-4331-8d46-bc9a04b5b6e3	Excellent	ابو مهند الاسد	##########			0	ar	us		5	ur	excellent	Positive	0	0	0
Google Play Store	b6081799-76c7-43c2-accd-e330cc9b6ebe	Excellent.	سالم البناقي	##########			0	ar	us		5	ur	excellent	Positive	0	0	0
Google Play Store	c49fbefd-60b5-4122-be8d-d3136a7895f0	Excellent.	وليد الصبحي	##########			0	ar	us		5	ur	excellent	Positive	0	0	0
Google Play Store	edf39784-65e6-41e4-958b-79403c68aed4	Okay / Fine.	ibrahim hodhod	##########			0	ar	us		5	ur	okay fine	Positive	0	0	0
Google Play Store	c0c2ee70-d377-41c2-87eb-de21fe1b0d4c	Excellent	thyab almutairi	2023-02-03 02:44:00			0	ar	us		3	ur	excellent	Positive	0	0	0
Google Play Store	f6120ae4-c836-41d1-8c55-f4a8f8b87aef	Excellent.	ابوياسر المالكي	##########			0	ar	us		5	ur	excellent	Positive	0	0	0
Google Play Store	56610861-82ea-4db7-b3dc-d92f7186565e	Excellent	ALHAMED	##########			0	ar	us		5	ur	excellent	Positive	0	0	0
Google Play Store	206c315d-6e5d-4a3b-b3bf-27f164899dde	Excellent	عيد سيد	2023-01-08 05:02:00			0	ar	us		3	ur	excellent	Positive	0	0	0
Google Play Store	84e5ecc7-ebd3-41a3-ace6-e1fcbb405b7c	Excellent	عبده عبدالحليم أحمد	##########			0	ar	us		5	ur	excellent	Positive	0	0	0
Google Play Store	d3053007-2cd4-43e8-b64b-a4d6729cf25f	Excellent	عبده العمراني	2023-01-01 06:07:00			0	ar	us		5	ur	excellent	Positive	0	0	0
Google Play Store	d3432b62-ea61-4e8e-8f6f-d6d966d91592	Excellent	حسين ابوحمد g (‪A. B Hamed‬‏)	##########			0	ar	us		4	ur	excellent	Positive	0	0	0
Google Play Store	631f01da-6d8f-46a1-901a-eaccc5f48a65	Excellent.	Alaa Shoqair	##########			0	ar	us		5	ur	excellent	Positive	0	0	0
Google Play Store	43dd4da4-f879-4009-900a-7d582b7ce749	Excellent	فيصل الدوسري	##########			0	ar	us		5	ur	excellent	Positive	0	0	0
Google Play Store	105dd279-d22f-4ae2-85cd-97ad6d12648e	Excellent	سيف مالكي	##########			0	ar	us		5	ur	excellent	Positive	0	0	0
Google Play Store	166b4652-5302-4f9f-80e0-181fb6c79338	Excellent	عبدالله حسين	##########			0	ar	us		5	ur	excellent	Positive	0	0	0
Google Play Store	3dbea80b-4d75-47e9-adf1-cdb7c4ec9641	Excellent	ابو نونا SOR	##########			0	ar	us		5	ur	excellent	Positive	0	0	0
Google Play Store	24cb5e48-006c-4009-917f-346ede14e1bd	"Menawar" translates to "bright" or "illuminated" in English.	محمود احمد النايلي النوايل	##########			0	ar	us		5	ur	menawar translate bright illuminate english	Neutral	1	0	0
Google Play Store	23af6fa7-f587-494e-9d6f-d044477d0319	Excellent	ابو يحيى الجوهري	##########			0	ar	us		5	ur	excellent	Positive	0	0	0
Google Play Store	625b1350-33a3-431f-aa91-49179276f324	Excellent	Sadder twins Al	##########			0	ar	us		4	ur	excellent	Positive	0	0	0
Google Play Store	06140ecf-49f1-460f-b2d2-9b6df361d88e	Excellent	Rizkali Hawash	##########			0	ar	us		5	ur	excellent	Positive	0	0	0
Google Play Store	7a2b6341-773a-4391-a335-c9e4d9b661d6	Excellent	سعيد القحطاني	##########			0	ar	us		5	ur	excellent	Positive	0	0	0
Google Play Store	a9b731ea-a34c-499a-bd42-67ff057eaf10	Excellent	Basheer AB Momm	##########			0	ar	us		5	ur	excellent	Positive	0	0	0
Google Play Store	44ae7ee5-3776-4e27-a094-2a9158863483	Excellent	مسلم الرشيدي	##########			0	ar	us		5	ur	excellent	Positive	0	0	0
Google Play Store	36bff4c3-9740-4ed1-a8cf-17d16f101bf4	Excellent	رمضان السيد	##########			0	ar	us		5	ur	excellent	Positive	0	0	0
Google Play Store	13edadb3-bf27-4f7b-87c3-e85516a68447	Excellent	ABEER MOHAMED	##########			0	ar	us		5	ur	excellent	Positive	0	0	0
Google Play Store	14b8795a-62df-42e9-8460-1915c0125aee	Excellent	المحبوب المحبوب	##########			0	ar	us		5	ur	excellent	Positive	0	0	0
Google Play Store	f02cef3b-0276-4216-90a7-fc8a82d76331	Excellent	othm otaibi	##########			0	ar	us		5	ur	excellent	Positive	0	0	0
Google Play Store	9f60d2f5-45a7-47ab-b682-579d6652b08c	Excellent	ماجد الجميلي	##########			0	ar	us		5	ur	excellent	Positive	0	0	0
Google Play Store	251f5537-df21-4efc-aedc-9ad5876fccd2	Excellent.	ghalib ibrahim	##########			0	ar	us		5	ur	excellent	Positive	0	0	0
Google Play Store	4e3aa23b-a8a5-45a7-b351-3835936f97f1	Excellent	نبيل العمري	##########			0	ar	us		5	ur	excellent	Positive	0	0	0
Google Play Store	c10b2aff-ff41-48f5-8919-6277d2a7e606	Excellent	Osamaa Ahmad	##########			0	ar	us		5	ur	excellent	Positive	0	0	0
Google Play Store	3fd61120-b334-4af9-9843-2683ecbf1796	Excellent	Badar Alotaibi	##########			0	ar	us		5	ur	excellent	Positive	0	0	0
Google Play Store	1fb064a4-1b20-4d21-9607-bfc80bf771b7	Excellent.	Mohammad Gammal	##########			0	ar	us		5	ur	excellent	Positive	0	0	0
Google Play Store	8face773-02e9-41e3-b9de-0b20d5a7927f	Excellent	سيد رشدي	##########			0	ar	us		5	ur	excellent	Positive	0	0	0
Google Play Store	5f6a6bab-3e8d-4bc1-8465-2f2138ac950d	Excellent.	عوض المالكي	##########			0	ar	us		5	ur	excellent	Positive	0	0	0
Google Play Store	148b1b1a-6ab3-4aa5-b0bf-c3ec88dcf03b	Excellent.	jalal thabet	##########			0	ar	us		5	ur	excellent	Positive	0	0	0
Google Play Store	8e356373-efc9-4269-8cad-2bf30a949567	Excellent	HASSAN Alsafqy	##########			0	ar	us		5	ur	excellent	Positive	0	0	0
Google Play Store	bc9a3567-36c4-473b-b58e-dd0f11324e73	Excellent	خالد محمد	##########			0	ar	us		5	ur	excellent	Positive	0	0	0
Google Play Store	819a115e-11e6-4428-9695-d7e82622d0f2	Excellent	وائل البريهي	##########			0	ar	us		5	ur	excellent	Positive	0	0	0
Google Play Store	6541a503-566c-472e-a337-72ce723d1b62	Excellent	نعمان المزحاني	##########			0	ar	us		5	ur	excellent	Positive	0	0	0
Google Play Store	6de43ffa-86e0-407a-bda8-6151737d30e8	Excellent	ابراهيم علوان	##########			0	ar	us		5	ur	excellent	Positive	0	0	0
Google Play Store	9db50253-3b52-44b4-85ea-659dd41e5950	Excellent.	Yofa Ahmraey	##########			0	ar	us		5	ur	excellent	Positive	0	0	0
Google Play Store	16bc95d9-1a50-4338-b674-83b1ebd60f6e	Excellent	Dd R	##########			0	ar	us		5	ur	excellent	Positive	0	0	0
Google Play Store	5c09364f-876f-4a7f-996b-85a88a8514a5	dfasfa	Amr Badra	##########			0	ar	us		5	ur	dfasfa	Neutral	1	0	0
Google Play Store	68d69887-be5c-44a0-92b0-134a2d1c354a	Excellent	محمد بدر	##########			0	ar	us		5	ur	excellent	Positive	0	0	0
Google Play Store	c02be328-da3e-4b5c-abd9-d5530486c550	Excellent	ابو فيصل صالح الحربي	##########			0	ar	us		2	ur	excellent	Positive	0	0	0
Google Play Store	ee80760c-36b6-4695-992f-0de944186ab7	Excellent	Mohamed Saad	2022-08-09 01:08:00			0	ar	us		5	ur	excellent	Positive	0	0	0
Google Play Store	ce10f907-d06b-49a3-aa59-7395da067c9c	Okay	فهد المولد	##########			0	ar	us		5	ur	okay	Positive	0	0	0
Google Play Store	6191a16b-ab59-4d16-9829-e6a1e3e1c2fb	Excellent	Yas Homa	##########			0	ar	us		5	ur	excellent	Positive	0	0	0
Google Play Store	026860b6-776a-46fe-bd70-6f3858ce1fee	Excellent.	محمد الحر	##########			0	ar	us		4	ur	excellent	Positive	0	0	0
Google Play Store	1efcb552-8b9c-4c0f-a71f-222f41ba0a09	Excellent	عااشق ”عيونها“ عيووونها	##########			0	ar	us		3	ur	excellent	Positive	0	0	0
Google Play Store	ff020564-77ad-4adf-89e5-f162f1ee5182	Excellent	Hh Vvb	##########			0	ar	us		5	ur	excellent	Positive	0	0	0
Google Play Store	d8d4127b-0e03-45ac-a8d7-3f5636c231ad	Excellent.	A M	##########			0	ar	us		5	ur	excellent	Positive	0	0	0
Google Play Store	bfcbd296-6bf9-46f1-b94f-091d528fa989	Excellent	سعيد الفقيه	2022-07-08 01:41:00			0	ar	us		5	ur	excellent	Positive	0	0	0
Google Play Store	96668a26-e8ef-4b3a-ac07-fb677bbb20ba	Excellent	موسى الناشري	##########			0	ar	us		5	ur	excellent	Positive	0	0	0
Google Play Store	d8a240f3-5f15-489a-9aae-0a1eed1a86b1	Excellent	عزو حسين	##########			0	ar	us		5	ur	excellent	Positive	0	0	0
Google Play Store	95ac58c1-e20b-427c-8e0e-4e5e0fc2857b	Excellent	هيثم المراد	##########			0	ar	us		5	ur	excellent	Positive	0	0	0
Google Play Store	cb9935ad-2094-4ac5-bd8b-7853d47c617f	Excellent	Amoona Kareem	##########			0	ar	us		5	ur	excellent	Positive	0	0	0
Google Play Store	47b243d9-d675-42c9-811e-0bdbe3ca44b2	Excellent	خليل الطيار	##########			0	ar	us		5	ur	excellent	Positive	0	0	0
Google Play Store	30907305-1df7-4e92-93c8-6e0d5e062441	Excellent	عزيز القرني	##########			0	ar	us		5	ur	excellent	Positive	0	0	0
Google Play Store	b783e811-9d4c-4d20-a5b7-f54914894456	Excellent	حساب تيك توك 1300	##########			0	ar	us		5	ur	excellent	Positive	0	0	0
Google Play Store	35c5c703-65bc-4924-8183-0cdf2d46669d	Excellent	أبراهيم شهاب.1	##########			0	ar	us		5	ur	excellent	Positive	0	0	0
Google Play Store	89172b1e-e69b-484f-a573-016ae4c6d7f2	Excellent	Mohammad LA zaferyu	##########			0	ar	us		5	ur	excellent	Positive	0	0	0
Google Play Store	b0e04e53-bac8-4374-83ce-996e4f76a1f3	Excellent.	سعيد ال راجح	##########			0	ar	us		5	ur	excellent	Positive	0	0	0
Google Play Store	a1c53db4-5f31-43ab-9be4-a66a7e425671	Excellent	علي الطميحي	##########			0	ar	us		5	ur	excellent	Positive	0	0	0
Google Play Store	e26ebd3c-c513-4e00-bba6-a35dd5a9866f	Excellent	سوزان سليمان	##########			0	ar	us		5	ur	excellent	Positive	0	0	0
Google Play Store	8eae6e0f-6052-4a78-81c4-647ebacfddb7	Excellent	Nasser Z	##########			0	ar	us		5	ur	excellent	Positive	0	0	0
Google Play Store	1b305cc5-6065-40c7-af14-f4b30b907fac	Okay	Alfarouk Hapeip	##########			0	ar	us		2	ur	okay	Positive	0	0	0
Google Play Store	c03e2eeb-bf82-4b6f-acbc-4e5fd73a14d4	Excellent	ساري ساري	##########			0	ar	us		5	ur	excellent	Positive	0	0	0
Google Play Store	625009cb-c7fd-477c-af76-07ae90d798f2	Excellent	عبدالله محمد	##########			0	ar	us		5	ur	excellent	Positive	0	0	0
Google Play Store	9d6c966c-78b9-4e1d-82c7-8fc0cf8b1104	Accepted	يوسف ادم	##########			0	ar	us		2	ur	accept	Neutral	0	1	0
Google Play Store	e80436ed-adbe-4a0a-9a93-4a5c1e7211f7	Excellent	محمد عبدالحكم	2022-05-09 03:07:00			0	ar	us		1	ur	excellent	Positive	0	0	0
Google Play Store	330cbefa-c9aa-4229-9943-87bd1035c747	Excellent	ترميم منازل	##########			0	ar	us		5	ur	excellent	Positive	0	0	0
Google Play Store	1f33bb64-c6e8-4f3d-9b1b-bc60eba1ea23	Excellent	saad Koetm	##########			0	ar	us		5	ur	excellent	Positive	0	0	0
Google Play Store	a1362628-e3f1-47be-86bb-37a03ab7bc19	Excellent	رائد صدقة	##########			0	ar	us		5	ur	excellent	Positive	0	0	0
Google Play Store	d8d563a9-048d-43d8-809d-f930cb0b0d13	Excellen	beketa alaed8	##########			0	ar	us		5	ur	excellen	Positive	0	0	0
Google Play Store	4f994ac0-7469-4a41-9d10-29e065d636db	Excellent	نجيب الشرعبي	##########			0	ar	us		1	ur	excellent	Positive	0	0	0
Google Play Store	882486dd-813c-42dd-b709-d07d353ff733	Okay	علي عسيري	##########			0	ar	us		5	ur	okay	Positive	0	0	0
Google Play Store	33c06ad8-53c2-484d-bdc5-32e458040453	Excellent.	H H	##########			0	ar	us		5	ur	excellent	Positive	0	0	0
Google Play Store	f36600d9-cf55-4d9a-9b50-790dfaf83dd2	Excellent	ناصر الدوسرى	##########			0	ar	us		5	ur	excellent	Positive	0	0	0
Google Play Store	589abd81-be1a-4e4e-86e4-e3d6b43d88c5	Excellent	وسام الحارثي	##########			0	ar	us		5	ur	excellent	Positive	0	0	0
Google Play Store	15d4e69f-abd2-4871-b6a9-e0125592c332	Excellent	محمد الوراريق	##########			0	ar	us		5	ur	excellent	Positive	0	0	0
Google Play Store	aeabdb7f-103f-4965-bc54-b4be250ab637	Excellent	يوسف ال عبدالله	##########			0	ar	us		5	ur	excellent	Positive	0	0	0
Google Play Store	8baa871a-7eca-4591-a310-f2169bbefa32	Excellent	نوف المطيري	##########			0	ar	us		5	ur	excellent	Positive	0	0	0
Google Play Store	3dc282e2-637a-4bef-8c8d-6f379f452b61	Excellent	احمد محمد	##########			0	ar	us		5	ur	excellent	Positive	0	0	0
Google Play Store	089097fb-02a1-44df-b41c-50e0c630f8f1	Excellent	سيف الصمادي	##########			0	ar	us		5	ur	excellent	Positive	0	0	0
Google Play Store	ea63f418-646f-4a48-81d2-e28a3561e066	Excellent	Sh sh	##########			0	ar	us		5	ur	excellent	Positive	0	0	0
Google Play Store	7a410088-2f1f-4e5b-a17a-dac404e51755	Excellent	Abo Ood	##########			0	ar	us		5	ur	excellent	Positive	0	0	0
Google Play Store	0f6c5c05-986d-413d-b922-68328cebf1ea	excellent	Hatim Shewaila	##########			0	ar	us		5	ur	excellent	Positive	0	0	0
Google Play Store	06abaac0-2d49-49db-a3ab-8d4aa76e7d44	Excellent	Abdelwahab Helmy	##########			0	ar	us		5	ur	excellent	Positive	0	0	0
Google Play Store	f73318d4-8901-436a-90cc-152499d6acdf	Excellent	Nazeeh Arnous	##########			0	ar	us		5	ur	excellent	Positive	0	0	0
Google Play Store	defd4f86-20c5-4a55-96c4-9ca7f0edcd2d	Excellent.	mohamed kamili	##########			0	ar	us		5	ur	excellent	Positive	0	0	0
Google Play Store	af8a95a6-dac8-4067-a1d2-26470131080b	Excellent	Mohmmad al tamimi	##########			0	ar	us		5	ur	excellent	Positive	0	0	0
Google Play Store	d489c0b8-bcdb-4845-8da4-e4db50a91653	Excellent	mm s	##########			0	ar	us		5	ur	excellent	Positive	0	0	0
Google Play Store	c11c2b71-95a6-4075-a9fd-c080a6cfd33a	Okay/All right.	frhha	##########			0	ar	us		5	ur	okayall right	Neutral	0	0	0
Google Play Store	70931099-ad46-4946-bb04-2a6e1c57dd90	Excellent	osmanalsmaniali mohammed	##########			0	ar	us		5	ur	excellent	Positive	0	0	0
Google Play Store	47792f0f-408b-4b70-85dd-b251ab254432	Excellent	Bilal Baker	##########			0	ar	us		5	ur	excellent	Positive	0	0	0
Google Play Store	cfa7ee9d-372e-491c-976e-0492d808c214	Excellent	منوعات عبدالواحد رفه	##########			0	ar	us		5	ur	excellent	Positive	0	0	0
Google Play Store	97b50805-84e9-4683-8137-eebc27f841ee	Excellent	Abuammar AL-Asmari	##########			0	ar	us		5	ur	excellent	Positive	0	0	0
Google Play Store	c64dbaaf-445b-4859-b9b3-7b790eca4437	Excellent	ali Zaid	##########			0	ar	us		5	ur	excellent	Positive	0	0	0
Google Play Store	33e3301d-ce8b-4513-8790-32304267a0cb	Excellent	mhed saleh	2022-04-05 06:24:00			0	ar	us		5	ur	excellent	Positive	0	0	0
Google Play Store	8916413a-ed68-494c-a0b7-b3ac2f039598	Excellent	taher elmnofy	2022-04-05 00:35:00			0	ar	us		5	ur	excellent	Positive	0	0	0
Google Play Store	d7cc7709-410d-4ddf-9c6c-98b417634aa1	Excellent	زناتي ضيف	##########			0	ar	us		5	ur	excellent	Positive	0	0	0
Google Play Store	64de1d95-c1f9-4883-8d18-bbd9f10325fb	Excellent	Walid Mohad	##########			0	ar	us		5	ur	excellent	Positive	0	0	0
Google Play Store	22bc4d37-9275-44df-817d-2ece0b433505	Excellent	مجموعة سعود محمد القحطاني التجارية	##########			0	ar	us		5	ur	excellent	Positive	0	0	0
Google Play Store	615cdb59-ce40-4168-8054-9ac998cae42c	Excellent	الشيخ محمد عمار	##########			0	ar	us		5	ur	excellent	Positive	0	0	0
Google Play Store	8e6c3296-45b5-4e96-ab20-9aae392ab71a	Excellent	عبدالله سالم (السيد)	##########			0	ar	us		5	ur	excellent	Positive	0	0	0
Google Play Store	bfb45445-8196-45ed-9361-4108d79644a9	Excellent	محمد عبدالوهاب خضر	##########			0	ar	us		5	ur	excellent	Positive	0	0	0
Google Play Store	d5ade2c2-45c1-468d-af58-54af472866c7	Excellent	علي القاضي	##########			0	ar	us		5	ur	excellent	Positive	0	0	0
Google Play Store	6277dcc2-f6c0-449d-b5a8-8b1371fc6af4	Excellent	حمد المطيري (أبوتميم)	##########			0	ar	us		5	ur	excellent	Positive	0	0	0
Google Play Store	b446c072-160d-4c03-8b97-8e95750d199f	Excellent	Abooode Abooode	##########			0	ar	us		5	ur	excellent	Positive	0	0	0
Google Play Store	a9296796-2386-4dcb-bbc9-70610675f213	Excellent	Abogaber 2019	##########			0	ar	us		5	ur	excellent	Positive	0	0	0
Google Play Store	9cccbdf5-90e2-4a22-9d29-9861f0dbe493	Excellent	أحمد العبدالله	##########			0	ar	us		5	ur	excellent	Positive	0	0	0
Google Play Store	1de51c80-1547-4993-91ad-2a50507bbf5a	Excellent	Hamed Al-howsay	##########			0	ar	us		5	ur	excellent	Positive	0	0	0
Google Play Store	7358fbc6-d46a-448c-b37a-d46a6de5de5f	Excellent	فيصل العبسي	##########			0	ar	us		5	ur	excellent	Positive	0	0	0
Google Play Store	9756bac9-8a1c-4493-bc20-d9711f4dee60	Excellent	أبودارين	##########			0	ar	us		5	ur	excellent	Positive	0	0	0
Google Play Store	779a9263-1de3-4e77-ba05-cc80c9fafd13	Okay.	ibrahim farid	##########			0	ar	us		5	ur	okay	Neutral	0	0	0
Google Play Store	9f84f4c5-6857-4cc4-8ed1-c824ceb2c81a	Excellent	maka. madyna	##########			0	ar	us		5	ur	excellent	Positive	0	0	0
Google Play Store	7d6e8c6e-aa6a-40e7-ac6d-81011d233028	Excellent	mnhghy mnartty	##########			0	ar	us		5	ur	excellent	Positive	0	0	0
Google Play Store	c49723cc-7f70-4a27-85a2-070e5699eaca	Excellent	محمود مصطفى	##########			0	ar	us		5	ur	excellent	Positive	0	0	0
Google Play Store	0c68acfe-42d9-4d5e-9d86-178b0f90d0e8	Excellent	Muhammed Saad	##########			0	ar	us		5	ur	excellent	Positive	0	0	0
Google Play Store	2757a983-a69f-4551-85c0-1432caf5ae29	Excellent	احمد عسيري	##########			0	ar	us		5	ur	excellent	Positive	0	0	0
Google Play Store	1e884ce3-60a6-4745-839a-8decf11967e2	Excellent	طاهر محمد عبدالكريم	##########			0	ar	us		5	ur	excellent	Positive	0	0	0
Google Play Store	f93dd3e2-c8b3-4709-b726-c4113c8b3b12	Excellent	Raid Jaafreh	##########			0	ar	us		5	ur	excellent	Positive	0	0	0
Google Play Store	8d230dff-bae3-4f14-9a2c-286f2210d118	Excellent	ابوخالد الرشيدي	##########			0	ar	us		5	ur	excellent	Positive	0	0	0
Google Play Store	ec688a02-bc28-4d75-abfb-b23f11f7f763	Excellent	Hdaia Asiri	##########			0	ar	us		5	ur	excellent	Positive	0	0	0
Google Play Store	e4760eee-04ad-44a2-8091-1b24e1b4abc9	Excellent	القصه الاخيره	##########			0	ar	us		5	ur	excellent	Positive	0	0	0
Google Play Store	d81fbc09-75c9-4c98-90d8-d4f6b935eee6	Excellent	محمد ابو حمزه	##########			0	ar	us		5	ur	excellent	Positive	0	0	0
Google Play Store	5f2f30ec-479e-444a-bd69-730f85ed3bf1	Good	احمد حريصي	##########			0	ar	us		5	ur	good	Positive	0	0	0
Google Play Store	ee6f598b-bb15-4f08-afe8-3710667f0a7c	Excellent	صالح النهدي	##########			0	ar	us		5	ur	excellent	Positive	0	0	0
Google Play Store	90e2d40f-19fd-461c-9b3f-3629206aa565	Excellent	ياسر حسن ضوي أبويوسف	##########			0	ar	us		5	ur	excellent	Positive	0	0	0
Google Play Store	9a26f814-f0cf-449a-8653-d9b176730e69	Excellent	علي شيهاب	##########			0	ar	us		5	ur	excellent	Positive	0	0	0
Google Play Store	07f47f44-3ef9-4b4c-8226-af91f3b5215f	Excellent.	محمد حسن	2022-03-07 09:41:00			0	ar	us		5	ur	excellent	Positive	0	0	0
Google Play Store	eaa0b355-d2b0-490b-82a6-28b1bed53f43	Excellent	Mogahed36 Memo	2022-03-04 04:35:00			0	ar	us		5	ur	excellent	Positive	0	0	0
Google Play Store	a3033cf9-5e18-46e7-ab7c-f2e89b650d77	Excellent	خالد الظبري	##########			0	ar	us		5	ur	excellent	Positive	0	0	0
Google Play Store	c721f792-38fe-4cf5-bcab-cc7f460a6d2d	Excellent	المك ابوالمك	##########			0	ar	us		5	ur	excellent	Positive	0	0	0
Google Play Store	9fa73053-8cec-4e30-b080-6e1fedb89338	Excellent	عامر كعبي	##########			0	ar	us		5	ur	excellent	Positive	0	0	0
Google Play Store	db72bca2-0fcc-4833-be75-2063e2feed29	Excellent	عبدالعزيز محمد البعداني	##########			0	ar	us		5	ur	excellent	Positive	0	0	0
Google Play Store	084fcbc8-3104-496a-8d86-4ac3cc74181e	Excellent	خالد محمد	##########			0	ar	us		4	ur	excellent	Positive	0	0	0
Google Play Store	a538b2bf-cff8-434e-baa4-37f8636e17e8	Excellent	aah mm	##########			0	ar	us		5	ur	excellent	Positive	0	0	0
Google Play Store	85a3473c-bcaa-43cb-ba10-d1027bda5a68	Excellent	mosa abwsaed	##########			0	ar	us		5	ur	excellent	Positive	0	0	0
Google Play Store	da2fdbd3-cef9-4291-8934-dc887f3edc15	Excellent	tarek kasem	##########			0	ar	us		5	ur	excellent	Positive	0	0	0
Google Play Store	b9dc76bc-922d-4624-98fe-484b3bfd9f41	Excellent	محمد أحمد	##########			0	ar	us		3	ur	excellent	Positive	0	0	0
Google Play Store	5ce28d67-bab3-4066-9fe1-842bfdfafb0c	Excellent	وجيه النصار	##########			0	ar	us		5	ur	excellent	Positive	0	0	0
Google Play Store	1d54299d-396b-46de-a7e2-0e241e96fbbc	Excellent.	Alaa Badawy	##########			0	ar	us		5	ur	excellent	Positive	0	0	0
Google Play Store	35f52e64-bea9-4340-8d7c-7e2ab9b4d992	Excellent	ziyad alhawwasi	##########			0	ar	us		5	ur	excellent	Positive	0	0	0
Google Play Store	435f45c2-d0a0-470b-bbd4-cc7cbb0517de	Excellent	Mosab Shargawi	##########			0	ar	us		5	ur	excellent	Positive	0	0	0
Google Play Store	ea35c770-c2fe-4bac-8a16-991bc84ca7be	Excellent	صالح المطري	##########			0	ar	us		5	ur	excellent	Positive	0	0	0
Google Play Store	5b22249f-1059-452d-9c34-c17586fbb50d	Excellent	Omer Ahmad	##########			0	ar	us		5	ur	excellent	Positive	0	0	0
Google Play Store	0fb090ec-229a-4aad-ab0d-7eba995df9b0	Excellent	fysl bdallh	##########			0	ar	us		5	ur	excellent	Positive	0	0	0
Google Play Store	b8a99a59-6319-42de-b7b2-28ba93ca158d	Excellent.	Ahmed Awad	##########			0	ar	us		5	ur	excellent	Positive	0	0	0
Google Play Store	424c3835-61b0-4d81-bc49-36bfd15c2aec	Excellent	عبودي /:	##########			0	ar	us		3	ur	excellent	Positive	0	0	0
Google Play Store	c49c8fa9-2d50-4002-8fd4-5036faeb212c	Excellent	ابو رتيل	##########			0	ar	us		5	ur	excellent	Positive	0	0	0
Google Play Store	3f203158-0014-4973-8c31-9d0f345feb99	Excellent	عيد جابر	##########			0	ar	us		5	ur	excellent	Positive	0	0	0
Google Play Store	897fe014-cf28-45e6-8d80-e0a0f7c23d22	Excellent	nezaar Sayde	##########			0	ar	us		5	ur	excellent	Positive	0	0	0
Google Play Store	136a74e9-1b2b-465e-8e3f-e0cde29629bd	Fasl	عبدالله القحطاني	##########			0	ar	us		1	ur	fasl	Neutral	0	0	0
Google Play Store	e70658d0-0c7e-4f26-8278-59731fb62d08	Security	سليمان منصور	##########			0	ar	us		5	ur	security	Neutral	0	1	0
Google Play Store	87968925-9fe9-4c04-a8d0-03fa93fe1627	1111111111 Yassalam	Salm Massod	2022-01-04 07:05:00			0	ar	us		5	ur	yassalam	Neutral	0	0	0
Google Play Store	972b283d-a031-42f1-b9ee-27c83cadcbd5	Excellent	Khaled Khaledd	##########			0	ar	us		5	ur	excellent	Positive	0	0	0
Google Play Store	3570f9f5-ce16-48eb-a172-e477236fb55d	It doesn't work.	ابوغسان الجهني	##########			0	ar	us		1	sd	doesnt work	Negative	0	1	0
Google Play Store	a87d2dc7-7c32-4a3b-af2d-0945d409e406	will	M. IBRAHIM	##########			0	ar	us		1	sd		Neutral	0	0	0
Google Play Store	3cf6e735-21f9-4331-a308-8c8a1f0a12eb	Useful.	محمد الزهراني	##########			0	ar	us		5	sd	useful	Positive	0	0	0
Google Play Store	d0bcd666-5f6d-4751-871d-c543e05f9660	Satisfied	Khalid Gumaa	##########			0	ar	us		5	sd	satisfy	Positive	0	0	0
Google Play Store	a12a6c84-b466-48e6-a60c-28092ec3d9e7	nice	سعيد عبدالله موسى احمد	##########			0	ar	us		5	sd	nice	Positive	0	0	0
Google Play Store	3c7c7912-09cd-4c09-ad9a-8ac9b6d46e09	Excellent very very very very very very very very very	محمد احمد عبدة الاخرش	##########			0	ar	us		5	sd	excellent	Positive	0	0	0
Google Play Store	670de77d-8598-48fb-baae-24ab393d9f6b	bad	فواز الجحدلي	##########			0	ar	us		1	sd	bad	Negative	1	0	0
Google Play Store	faadcf5f-60ed-4892-9223-1e4429090659	The application is great!	محمد عثمان	##########			0	ar	us		1	sd	application great	Positive	0	0	0
Google Play Store	6b1e722a-58be-42dd-a412-0e27e5e510fc	Will	alhasoni defllh	##########			0	ar	us		1	sd		Neutral	0	0	0
Google Play Store	5e3ad956-e3ca-4791-b91c-b0363406ea2a	bad	احمد حسن	##########			0	ar	us		1	sd	bad	Negative	1	0	0
Google Play Store	85b1e888-bb97-4c8b-9026-7ba8d123972f	It does not work.	aa aa	##########			0	ar	us		1	sd	work	Negative	0	1	0
Google Play Store	5e5061ec-7bed-41fe-9167-a26dfb36b285	bad	مرزوقه	##########			0	ar	us		1	ps	bad	Negative	1	0	0
Google Play Store	09414570-94ab-4137-9539-1f62a7a824e9	bad	Zayed Shahrani	##########			0	ar	us		1	ps	bad	Negative	1	0	0
Google Play Store	610dbb8b-21c4-4f27-8b44-084cffa0c231	Bad	fahad h	##########			0	ar	us		1	ps	bad	Neutral	1	0	0
Google Play Store	8f87c02f-df5f-444e-b4d7-a83777e1d44f	And	احمد الفقيه	##########			0	ar	us		5	ps		Neutral	0	0	0
Google Play Store	6fa913c1-29ed-46f8-bcbd-926074b2267a	fasf	Manaf Abdallah	##########			0	ar	us		5	ps	fasf	Neutral	0	0	0
Google Play Store	346c2cf6-7472-428c-b0bc-6537ec9be3b5	Very good	Eman Ousam	##########			0	en	us		5	en	good	Positive	0	0	0
Google Play Store	e0f5ea28-aa15-4c19-b4d5-9f9d0dbe328b	Ok	Arshad Ali	##########			0	en	us		5	en	ok	Positive	0	0	0
Google Play Store	6510df90-da4b-4fad-8eeb-a4ee9d4df9bd	Need To Be Updated & More Facilities To Be Added Like The Other Banks.	Abid Hussain	##########			0	en	us		5	en	need update facilities add like bank	Neutral	1	0	0
Google Play Store	6ac092cb-8ea6-40f5-a96e-0544db3ddc73	Very bad and collapse easily, making you trying to logout and in again	omer banda	##########			0	en	us		1	en	bad collapse easily make try logout	Negative	1	0	0
Google Play Store	c7028084-9dc1-4ac2-80ed-1feb502ecd99	Al bilad app is no't woarking today	Mr. Kalam Khan	##########			0	en	us		4	en	al bilad app woarking today	Negative	1	0	0
Google Play Store	e0ad758e-1313-47ff-9f6c-593848269573	Worst bank app. Always getting crashed and can't access. Old style, not much features. It is really shame.	Mohamed Ali	##########			9	en	us		1	en	bad bank app always get crash cant access old style much feature really shame	Negative	1	1	1
Google Play Store	9db99171-47cd-4e8d-9985-54b22c54e58b	Always crash lag and hard to log in	Jimmy Picaña	##########			0	en	us		1	en	always crash lag hard log	Negative	0	1	1
Google Play Store	c56e8fd7-0d6b-497f-8d4c-f7617e24dac0	Frequent crashes!	WH Hamza	##########			0	en	us		2	en	frequent crash	Negative	0	1	0
Google Play Store	d9c6d24f-826c-4dec-84be-2fae11a38f38	How the hell they called bank which even can't develop single app without any bug 😕	Faizan Mulla	##########			0	en	us		1	en	hell call bank even cant develop single app without bug	Negative	0	1	0
Google Play Store	01d0afc4-ca9b-4847-bbfb-0b5a955d310a	Very slow and laggy app. Very bad for a bank app.	Calvin Lei	##########			0	en	us		1	en	slow laggy app bad bank app	Negative	1	0	1
Google Play Store	427b4faa-0fd8-48fc-bb62-54a5fa996044	Bad application I've ever used	blue	##########			0	en	us		1	en	bad application ive ever use	Negative	1	0	0
Google Play Store	0f9913a2-055f-4c52-b654-d5dd3a2005c5	I think they should not provide waste application on play store as I am using small bank applications comfortably but this albilad application is totally waste and It was my mistake to open account on this bank it is totally waste and I recommend everyone not to even open account on albilad and now I am going to close my account on albilad Worst and worst app	Er Javed	##########			0	en	us		1	en	think provide waste application play store use small bank applications comfortably albilad application totally waste mistake open account bank totally waste recommend everyone even open account albilad go close account albilad bad bad app	Negative	1	0	0
Google Play Store	a0427040-f34c-4a37-9d4c-428b8840e61b	Bad experience and irretation apps.	Lulu Castromero	##########			0	en	us		1	en	bad experience irretation apps	Negative	1	0	0
Google Play Store	e2f8c2ad-8a18-4dc4-846f-1815c5be7e8d	Good	Mohammad Ajam Khan	##########			0	en	us		4	en	good	Positive	0	0	0
Google Play Store	ba8194c6-6ba9-4bc8-b9db-57e5463f574f	Unable to open an account Worst bank and worst service	Farman Network (Farman Noori)	2023-08-06 09:41:00			0	en	us		1	en	unable open account bad bank bad service	Negative	1	1	0
Google Play Store	4a2bba7a-12cd-42be-9096-2c270f202405	Not working it's crashed	Nawaz Khan	##########			0	en	us		1	en	work crash	Negative	0	1	0
Google Play Store	9fd6d229-153f-4b91-8140-233ed50b480d	I am use new function	Kafil Uddin	##########			0	en	us		5	en	use new function	Neutral	0	1	0
Google Play Store	1c860e17-3d31-4b1a-8250-85b2922c651c	Great 👍	Israr Khan	##########			0	en	us		5	en	great	Positive	0	0	0
Google Play Store	84e0ca17-75f9-4218-9ef9-693a9dbe1f08	I am trying many times to share any cash transfer process.. but it's not working.	Ahmad Albeetar	##########			1	en	us		1	en	try many time share cash transfer process work	Negative	0	1	0
Google Play Store	0f24e3e1-2cd6-4839-914e-2532815b8fb1	Keeps crashing	Mosaed Romman	##########			1	en	us		1	en	keep crash	Negative	0	1	0
Google Play Store	85074b68-378b-4e42-9f93-85c8205a8427	App is not working	Mohamed Mostafa	##########			0	en	us		1	en	app work	Negative	0	1	0
Google Play Store	f043e2e1-e98d-4936-9bef-8338c10eeb25	Token not appearing thru the app, i already registered before but the token is not working when you send money,	Fernando Espejo	##########			4	en	us		1	en	token appear thru app already register token work send money	Negative	0	1	0
Google Play Store	0ad2a450-8954-4810-a78c-c33369c4f6a5	The worst bank app I ever used. Even small banks has more stable apps. Always carshs, lags, silly outages. Really, it's a waste of time to use such bank application.	Mahmoud Fayed	##########			17	en	us		1	en	bad bank app ever use even small bank stable apps always carshs lag silly outages really waste time use bank application	Negative	1	0	1
Google Play Store	8e8c836b-89f5-4c28-a189-4d494be81d85	Very bad app always crash and very bad customer service dont reccomend this bank at all	Mohamed Elshamy	##########			3	en	us		1	en	bad app always crash bad customer service dont reccomend bank	Negative	1	1	0
Google Play Store	114c2190-7ec8-4fb7-b519-cf6c427d7b5a	Very bad Many times i try to open but showing services is not available	mohamed abd el wahab	##########			5	en	us		1	en	bad many time try open show service available	Negative	1	1	0
Google Play Store	908972d0-3886-43d7-b9f8-d529c459c75e	Using this stupid app is the worst user experience ever! It always lets you down when needed..	Ghassen Boubakri	##########			4	en	us		1	en	use stupid app bad user experience ever always let need	Negative	1	0	0
Google Play Store	a928117c-627d-499b-8407-cfbe36b26735	Bad	Abu Yusef	##########			0	en	us		1	en	bad	Neutral	1	0	0
Google Play Store	9bfc6b37-26e1-4b6a-b848-438716e694af	Over all a good banking service and app too...	Zafar Iqbal	##########			0	en	us		4	en	good bank service app	Positive	0	0	0
Google Play Store	7de45c7a-93fa-422a-a4a7-5bc840632656	Very bad experience with this app Always crashing 🙄	Mohammed Ali	##########			4	en	us		1	en	bad experience app always crash	Negative	1	1	0
Google Play Store	4181d583-1c2f-476f-b77c-eb3cdfd24778	last update is very very bad app so slow and crush all time	BeeDamn ...	##########			1	en	us		1	en	last update bad app slow crush time	Negative	1	0	1
Google Play Store	7f127ec4-0dca-4be1-852d-f774abff1560	Very bad app	Mohammed lotfy	##########			0	en	us		1	en	bad app	Negative	1	0	0
Google Play Store	fa08e45a-028c-4fff-a03d-69e1c6bb34e4	Very bad app Problems with loading My account opened with browser but not opened with the app	Ahmed Rawhy Younes	##########			3	en	us		1	en	bad app problems load account open browser open app	Negative	1	1	0
Google Play Store	056c535d-b120-4a12-a96d-dd6eb9b25f5c	I've bad experience using this app or product services, they having worst services and the customer services even the manager are unprofessional employee, they can't explain about their product even they don't know about they program, I got yelled by the manager. My money stuck and they don't have a solution or even don't do anything, it's from to local, not international, worst services ever.	Malik abdul azis	##########			8	en	us		1	en	ive bad experience use app product service bad service customer service even manager unprofessional employee cant explain product even dont know program get yell manager money stick dont solution even dont anything local international bad service ever	Negative	1	1	0
Google Play Store	ffb183fe-4dd9-4637-8aed-0e629e2d2059	Login Problem.	Hamza Meer	##########			0	en	us		1	en	login problem	Negative	0	1	0
Google Play Store	ce7d5410-d873-4f64-87f8-052c16f32fe0	Could some one answer me if this application is working please, Cuz i want to try it😔	Wolverine Tweentyeight	2023-06-01 02:52:00			0	en	us		4	en	could one answer application work please cuz want try	Neutral	0	1	0
Google Play Store	59dfe8f2-950b-4f8b-abda-82d2a812cb6b	Please fix bug working without alphabet 🥴😏	mohd javed. mixed .	##########			0	en	us		2	en	please fix bug work without alphabet	Negative	0	1	0
Google Play Store	2e442825-6449-4606-9dc9-c5db389480b4	The app is not working completely Zero percent functionality I urge you all to stop using this app and start using apps from other competitors	Rasheed M.	##########			0	en	us		1	en	app work completely zero percent functionality urge stop use app start use apps competitors	Negative	1	0	0
Google Play Store	c2e5185f-4222-4b78-98b7-c4bec22d76e3	Please make app non resident can open account	Shoaib akhter Saudi Arabia	##########			0	en	us		1	en	please make app non resident open account	Neutral	0	1	0
Google Play Store	1e236e0b-42c4-4c0f-acf3-8cd488300adf	I am trying to open an on line account but system is unable to integrate successfully while verifying your credentials at the end.	Khurram Jafri	##########			11	en	us		1	en	try open line account system unable integrate successfully verify credentials end	Negative	0	1	0
Google Play Store	32d6828a-4f34-4479-aae8-5cf2bfb1447f	App crashes, buggy and bad user experience. I'm trying to apply for credit card and the app always crashes or keep loading mid of the process and nothing happens.	Mohamed Nour	##########			17	en	us		1	en	app crash buggy bad user experience im try apply credit card app always crash keep load mid process nothing happen	Negative	1	1	1
Google Play Store	48695328-310c-4b11-b1d4-7435059e1264	Not good	bashar 112	##########			0	en	us		1	en	good	Negative	0	0	0
Google Play Store	ecd48454-ad5a-453e-8b4f-1d44869d366a	4 s 56 t su5 3 3d4 stedse OzYM7Text you copy will automatically show here	Yffg Iugy	##########			0	en	us		4	en	su stedse ozymtext copy automatically show	Neutral	0	1	0
Google Play Store	dd25fbd8-0206-4cc6-abc5-1782ce391483	Very good app	Mansour	##########			0	en	us		5	en	good app	Positive	0	0	0
Google Play Store	27995b04-a748-44a5-a00c-d4d97875706d	I'm not able to log in from outside KSA. Even no error message just searching.	John Saim	##########			1	en	us		4	en	im able log outside ksa even error message search	Negative	0	1	0
Google Play Store	50452e89-e3a2-41b2-a63a-09c5cb27b57f	Please update system.Add Islami Bank Bangladesh All Branch,i want ramu branch 2050 Thank YOU	Best Contain SUN	2023-05-04 08:01:00			0	en	us		3	en	please update systemadd islami bank bangladesh branchi want ramu branch thank	Neutral	0	1	0
Google Play Store	e7137f7f-90d7-4638-886a-ab98caec19ce	A very bad application, irritation and problems, and sometimes it plays with bills. I hope to modify or delete it, and only use it from the browser. People's money is not a game	S	##########			15	en	us		1	en	bad application irritation problems sometimes play bill hope modify delete use browser people money game	Negative	1	1	1
Google Play Store	9f9a9b11-0c76-4617-8854-49b26c9208f2	App is good butt app opening time not working time to time..	Iqrar Rao	2023-05-03 03:17:00			0	en	us		5	en	app good butt app open time work time time	Positive	0	1	0
Google Play Store	c6f92a0d-18e0-439e-98ae-a6a04a416cc2	Worst bank APP	Mohamed Allam	##########			0	en	us		1	en	bad bank app	Negative	1	0	0
Google Play Store	c33b9b3f-a784-4d40-be49-7aeefd785ac6	Worst app ever tried.😔 Please fix some bugs,,, 😔	cYiAnTiPiKo	##########			0	en	us		1	en	bad app ever try please fix bug	Negative	1	1	0
Google Play Store	efe5cca3-fbfe-4dae-8435-82b74021ec37	Good	Praदिप Katवाल official	##########			0	en	us		3	en	good	Positive	0	0	0
Google Play Store	709501aa-e5bd-4964-81df-d7530e8681d5	Worst bank app i have ever seen	Amr mahfouz	##########			0	en	us		1	en	bad bank app ever see	Negative	1	0	0
Google Play Store	6e3b2e89-f2ef-4f58-8332-bc1825d1df81	Good	Muhammad Ikraam	##########			0	en	us		5	en	good	Positive	0	0	0
Google Play Store	35469980-f58c-4ea3-a3e8-319b733beca0	Unstable	Ahmed Alfilali	##########			0	en	us		1	en	unstable	Neutral	1	0	0
Google Play Store	007ee476-88cc-443f-9ae1-248dd3cdf198	App is crashing when applying for tamkeen plus card online through app	Shaikh Tauqeer	##########			0	en	us		1	en	app crash apply tamkeen plus card online app	Negative	0	1	0
Google Play Store	66501529-27ef-480f-bb6b-c2fb71bfa419	User friendly, excellent banking app	Laith Momani	2023-04-08 00:11:00			1	en	us		5	en	user friendly excellent bank app	Positive	0	0	0
Google Play Store	1c6075e7-6822-46d4-a71e-5ab0076a98e7	Good on process	Vergara Babelyn	##########			0	en	us		5	en	good process	Positive	0	0	0
Google Play Store	248c6477-9e58-4c2b-b25b-93552189dfa7	On browser everything is fine but in the app everytime it says wrong username or password, poor app	Ahmed Saleem	##########			7	en	us		1	en	browser everything fine app everytime say wrong username password poor app	Negative	1	0	0
Google Play Store	808384c3-f7cf-4d6e-8b90-0a5ce4b75f05	V bad app	Rizwan Ahmad	##########			0	en	us		1	en	v bad app	Negative	1	0	0
Google Play Store	7fea8777-5108-446d-b119-b41fc5fbecf0	Poor quality of system	Yassin Magdy	##########			1	en	us		1	en	poor quality system	Negative	1	0	0
Google Play Store	43109480-2b94-491d-8922-84d24371463c	Nice bank Nice app.	Tahseen Danish	##########			0	en	us		5	en	nice bank nice app	Positive	0	0	0
Google Play Store	3795df27-9972-4f21-aaa2-e9be81c4a700	Very special & Amazing app 💖💖💖	Haider Ali Khan	##########			0	en	us		5	en	special amaze app	Positive	0	0	0
Google Play Store	3b76ed8d-dba9-474c-9571-0ee2399b0504	Doesn't work, shows system error	Baraa Aljouri	##########			0	en	us		1	en	doesnt work show system error	Negative	0	1	0
Google Play Store	de7f979f-211c-4351-9fcb-55bdaab3d343	App bug - app is closing when applying for takeem plus credit card. When filling up employer name the app is closing. Pls fix.	carlito castillo jr	##########			11	en	us		2	en	app bug app close apply takeem plus credit card fill employer name app close pls fix	Negative	0	1	0
Google Play Store	65ba6b77-fd62-42f3-9c1a-3d66507c6f4b	very tough to add beneficiary of Saudi Arabia	Raza jafri	##########			0	en	us		1	en	tough add beneficiary saudi arabia	Negative	1	0	0
Google Play Store	5bfb8a96-c87f-4cd1-b152-bbb96d541bd0	Nice	Philip Cinco Buo	##########			0	en	us		4	en	nice	Positive	0	0	0
Google Play Store	596b8856-373e-42e9-ab0c-a6c416d39bae	Good	zakaria khan	2023-03-05 05:43:00			0	en	us		5	en	good	Positive	0	0	0
Google Play Store	ca5decba-90a7-44c1-a211-7f566daafe65	The app has aproplem I can't insert even I removed and dawned agean..	Khalid Moghairabi	##########			0	en	us		1	en	app aproplem cant insert even remove dawn agean	Negative	1	1	0
Google Play Store	1fd0ca7c-4ab3-4f2d-bd19-2d022452ab05	Very nice bank albilad	usman rehmani	##########			0	en	us		5	en	nice bank albilad	Positive	0	0	0
Google Play Store	5f1ec44c-9aea-40ad-9c5d-c3d8d31cf8d8	Not good	Md noman bhuiyan	##########			0	en	us		3	en	good	Negative	0	0	0
Google Play Store	084cbece-ed5e-47f3-80a0-b885a72c0488	Had a bug and crash the application once I enter my user name and password, Find a solution for app, with updated version and fix the bugs, This is a bank app !!	Mm Sy	##########			11	en	us		1	en	bug crash application enter user name password find solution app update version fix bug bank app	Negative	0	1	0
Google Play Store	6e0cde4f-c954-40ef-8581-11465bf44316	It's frustrating and annoying how every time I try sign in it can't connect to the server l, and it doesn't seem that you're doing anything about it. It's been more than a week now. I used to like this bank but lately I'm starting to lose interest.	Bassim Kof	##########			1	en	us		1	en	frustrate annoy every time try sign cant connect server l doesnt seem youre anything week use like bank lately im start lose interest	Negative	1	1	0
Google Play Store	60f1ee02-3444-4532-adf0-87982c166bf5	What happen to the apps since it was an update..the apps unable to connect the server...why ohh why	RM HANDYMAN	##########			1	en	us		1	en	happen apps since updatethe apps unable connect serverwhy ohh	Negative	0	1	0
Google Play Store	0d4943d9-0931-4151-bdf9-2acf29ba0081	Past 3 days Unable to login due to server connectivity issue	Muhammad Rafeeq	2023-03-01 07:06:00			1	en	us		1	en	past days unable login due server connectivity issue	Negative	0	1	0
Google Play Store	7c80fa7c-d9cd-46ac-a1d1-c0a91503db27	Bad upgrade many times hanging and need to re install	hussain sabb	##########			0	en	us		1	en	bad upgrade many time hang need install	Negative	1	1	1
Google Play Store	3cc94ad4-403a-460d-8d78-b6367ba0deaa	too much lag, very poor app ... ...The app is no more working on android 9+ please remove it from play store	syserr X	##########			13	en	us		1	en	much lag poor app app work android please remove play store	Negative	1	1	0
Google Play Store	380f1bec-9985-4433-b33f-a93aa2842190	No good service error	Osama Siddiqui	##########			0	en	us		5	en	good service error	Negative	1	0	0
Google Play Store	bd9b02cd-95d5-4541-85ff-e244a80337f9	It says FAILED TO CONNECT AT THE SERVER , PLEASE TRY AGAIN LATER .. its already 3 days but still i cannot logged it to check my savings -	Mark Emil Imperial	##########			11	en	us		1	en	say fail connect server please try late already days still log check savings	Negative	0	1	0
Google Play Store	bfb747be-a777-4a77-8a37-50761cada036	Good	Ali Raza	##########			0	en	us		5	en	good	Positive	0	0	0
Google Play Store	781ba097-8213-4309-9554-5aa997ed1718	It says "unable to reach all Albilad services". This has been since Tuesday!	Ehab Abdoh	##########			1	en	us		1	en	say unable reach albilad service since tuesday	Negative	0	1	0
Google Play Store	bfbf5198-8ef7-4130-a778-b49cb0fde7de	Good	Nasim Mirza	##########			0	en	us		5	en	good	Positive	0	0	0
Google Play Store	70785718-4790-495b-bc1c-19b1ded3d20c	There is to many problems in the app	Meet Vip	##########			0	en	us		1	en	many problems app	Negative	0	1	0
Google Play Store	b2e7ad41-b62b-407e-b6cb-65456acc4e4c	I'm want to open new acount but im not getting any option of title not good apps	Miraz Sahrear Ifti	##########			0	en	us		1	en	im want open new acount im get option title good apps	Negative	0	1	0
Google Play Store	96bc6c28-0fe2-4c5e-8e38-5550ed647f07	Good	Amir shazia	##########			0	en	us		1	en	good	Positive	0	0	0
Google Play Store	081e8e38-38c7-4863-bec8-a63a141f9c29	Service not available. Try again	S S	##########			0	en	us		2	en	service available try	Negative	0	1	0
Google Play Store	30d84433-9427-47e6-b229-c309f64b416c	Opening an account is very troublesome 😞" followed by the English sentence "I have not seen so much trouble in other banks.	Kabir Hussain	##########			0	en	us		1	bn	open account troublesome follow english sentence see much trouble bank	Negative	1	0	0
Google Play Store	edf2b86c-c064-4fa9-b58d-3ba428e8af34	very bad	Totheutmost x	##########			0	en	us		1	en	bad	Negative	1	0	0
Google Play Store	e7211fbd-9b14-4755-b914-3ebcb172ba24	v. bad connec.	Kad Jameel	##########			0	en	us		1	en	v bad connec	Negative	1	0	0
Google Play Store	08466b7c-43f8-4948-8031-c0231226ff6b	Excellent	Muhammad Shahid Munir	##########			0	en	us		5	en	excellent	Positive	0	0	0
Google Play Store	a440077a-456a-4173-bbc4-a41c514b9963	Am want to open new acount but am not getting any option of title not good app	imran zafar	##########			2	en	us		1	en	want open new acount get option title good app	Negative	0	1	0
Google Play Store	93693dcb-1e71-4fe1-b222-49407e61d0c7	Please fix It's not working and I can't login	Baz	##########			0	en	us		1	en	please fix work cant login	Negative	0	1	0
Google Play Store	e8ff9509-9aef-4bbe-93bd-7a208c917e24	Worst bank app ever	Salah elfeky	##########			0	en	us		1	en	bad bank app ever	Negative	1	0	0
Google Play Store	96e8bf2a-0ff9-4dcd-829f-83a4ca98419a	Very very bad	AUDIT D.C	2023-02-09 06:32:00			0	en	us		1	en	bad	Negative	1	0	0
Google Play Store	af8837da-9a51-4d86-93db-c972dcd99b69	Good	Naveed Naveed	##########			0	en	us		5	en	good	Positive	0	0	0
Google Play Store	8bf5fe7d-f8b6-48b6-b50c-fa1072b5140c	Im using this for almost 10 year👌👍👌👍👌👍👌	Precious Javier	##########			0	en	us		5	en	im use almost year	Positive	0	0	0
Google Play Store	931b66ee-edf5-486f-bccf-a42230bbf325	poor bank	Ali Aliah	##########			0	en	us		1	en	poor bank	Negative	1	0	0
Google Play Store	275c82f8-21d1-456d-b440-ce261f9afcc0	Very good	أبو الكلام أبو الكلام	2023-02-02 01:35:00			0	en	us		5	en	good	Positive	0	0	0
Google Play Store	07fcbfd7-ba91-4d3a-8eac-5ebde98fa6a6	Not working always user name and password incorrect	SYED NAWAB	##########			6	en	us		1	en	work always user name password incorrect	Negative	0	1	0
Google Play Store	e3cb7476-6d84-42b8-904b-33c8bd5fb747	I am sick with this app always showing service is not to available please fix this problem	Irfan Ansari 073a	##########			16	en	us		1	en	sick app always show service available please fix problem	Negative	1	1	0
Google Play Store	7d7972da-4f09-446b-8c20-182b5c4d1102	Good working app	Muhammad Mubarok	##########			0	en	us		5	en	good work app	Positive	0	0	0
Google Play Store	35628113-4916-40b5-9922-c13af451c2db	Good app	Vv V	##########			0	en	us		5	en	good app	Positive	0	0	0
Google Play Store	eb879758-4ef7-4540-965d-0d3962c0c5fe	Good	kyamu ddin	##########			0	en	us		5	en	good	Positive	0	0	0
Google Play Store	a350ccd8-d5ca-4cc7-b5f8-403256597fac	Suddenly, the app doesn't work, idk how to manage my account now. Such an unprofessional upsate	Dr. Muayed Koraiz	##########			0	en	us		1	en	suddenly app doesnt work idk manage account unprofessional upsate	Negative	0	1	0
Google Play Store	669687ca-7230-4714-85e4-4765cf48b291	please can't open account in bilad bank. worst bank in ksa.	waqqas ali	##########			0	en	us		1	en	please cant open account bilad bank bad bank ksa	Negative	0	1	0
Google Play Store	e66fca28-1c77-4aca-87c7-d4046689a4a5	Excellent👌	muhammad waseem	##########			0	en	us		5	en	excellent	Positive	0	0	0
Google Play Store	67b87974-2424-4510-a612-268c2f7485a9	Terrible, definitely needs optimization	J D	##########			1	en	us		1	en	terrible definitely need optimization	Negative	1	0	0
Google Play Store	eae1510b-3125-4e41-9390-c49d778dcdeb	I'm unable to login in application...it says incorrect password or username but I'm logging in on the browser with the same username and password. I changed the password many times but still unable to login on application. Kindly Solved this Issue.	Muneeb Ahmed	##########			21	en	us		1	en	im unable login applicationit say incorrect password username im log browser username password change password many time still unable login application kindly solve issue	Negative	0	1	0
Google Play Store	00c62ed3-12df-4995-9e36-96b87befda5b	It is a very primitive app. Maybe it would be a good app if we are in 2011. You can do nothing with your app except if I want check my account balance, transfer money, or pay the bills. On top of that, I have to go through your basic, unfriendly and ugly user interface to do them. WAKE UP GUYS	Yasser Aljohani	##########			43	en	us		1	en	primitive app maybe would good app nothing app except want check account balance transfer money pay bill top go basic unfriendly ugly user interface wake guy	Negative	1	1	0
Google Play Store	d50b53f5-0771-42c6-a35a-5d310634e39a	Thos app is verry good pepel sadd	Mahfooz Khawaja	##########			0	en	us		1	en	thos app verry good pepel sadd	Positive	0	0	0
Google Play Store	6eb28a3f-07aa-42ba-96a0-0260a41f6069	Good	Foysal Hosen Foysal Hosen	##########			0	en	us		4	en	good	Positive	0	0	0
Google Play Store	45535f25-14e7-4577-9676-21be9555dd37	Great app .. I like it & easy to use.	abdulrhman alghamdi	##########			0	en	us		5	en	great app like easy use	Positive	0	0	0
Google Play Store	af058005-18da-426f-8196-22c6d89fc00f	Its very good app	mohd. abrar	##########			0	en	us		4	en	good app	Positive	0	0	0
Google Play Store	86d14345-d2f1-4dcd-a864-26220147ec3c	Very bad app	Mohamed Hussein	##########			0	en	us		1	en	bad app	Negative	1	0	0
Google Play Store	6ad474e5-c21e-40d5-9052-123b497f7698	This app is not working out of ksa so it is very bad experience.	Shakeel Ahmed	##########			0	en	us		5	en	app work ksa bad experience	Negative	1	1	0
Google Play Store	89d58914-8cb2-4afc-9cd8-f39a3b2621d1	Not good service 😒	Zhee Aton	##########			0	en	us		1	en	good service	Negative	0	0	0
Google Play Store	41d8a74b-f5e5-42da-b8d9-abca863cc93c	Worst customer care services and discusting experiance from the Jazan branch!!	abinbabu ej333	##########			0	en	us		1	en	bad customer care service discusting experiance jazan branch	Negative	1	0	0
Google Play Store	011802ff-aa42-4d62-a879-da20185a049e	Nice	Mohsin kik	##########			0	en	us		5	en	nice	Positive	0	0	0
Google Play Store	517e095f-6697-42ba-ba20-5318389c99f4	4 attempts to register but unfortunately, i was blocked for whatever reason. I feel sad	Pao Marzonia	##########			3	en	us		5	en	attempt register unfortunately block whatever reason feel sad	Negative	1	1	1
Google Play Store	0835eebe-5eb6-4cb4-bbc2-50ca5154feab	I am unable to login since 3 days	Mohammed Bakhribh	##########			0	en	us		1	en	unable login since days	Negative	0	1	0
Google Play Store	23d0c4e7-bf5e-4c68-8946-0fb922170c62	Unable to login	zezo mohammed	##########			0	en	us		1	en	unable login	Negative	0	1	0
Google Play Store	e47e83c9-1066-4884-b747-272e80571749	Good	ADNAN Awan	##########			0	en	us		5	en	good	Positive	0	0	0
Google Play Store	6b410bbb-b69c-4273-ae82-7f55bea14153	Satisfaction	VENUS GACCION	##########			0	en	us		5	en	satisfaction	Positive	0	0	0
Google Play Store	dc8b9464-fc8d-49f9-8948-a066f212b615	Very bad working always times network error	Imran Shah	##########			4	en	us		1	en	bad work always time network error	Negative	1	1	0
Google Play Store	07c76388-b2c2-4bab-ab41-a071db42d348	How can I put 0 start please as rating?? Is this really a professionnal app?. Trying to register..i get the sms and then impissible to type it...my phone os a standard android samsung...	Mohammed hajji	##########			1	en	us		1	en	put start please rat really professionnal app try registeri get sms impissible type itmy phone os standard android samsung	Negative	1	0	0
Google Play Store	9b78583a-290a-493c-8984-09a3a263ae81	It's not working I put my user and password Say incorrect. Pix this app	mohammad noor	##########			1	en	us		1	en	work put user password say incorrect pix app	Negative	0	1	0
Google Play Store	702122ed-ab0f-4dba-a17d-996d5d1d9ff6	I can't swipe to confirm payment	syed hadi	##########			0	en	us		3	en	cant swipe confirm payment	Neutral	0	1	0
Google Play Store	0011acf0-ed05-4b04-870e-16fc51c84632	Is not working	Master	##########			0	en	us		1	en	work	Negative	0	1	0
Google Play Store	b22b644e-5021-44fe-b278-c811725f3329	Very poor not working..	Imran Khan	##########			0	en	us		1	en	poor work	Negative	1	1	0
Google Play Store	80f03bff-e859-4dc0-be4c-b4478c3aaf8c	I'm unable to login in app.. It says incorrect password or username but I'm logging in on the browser with the same password and username I have changed the password many times but still unable to login the application	Anas Anas	##########			18	en	us		1	en	im unable login app say incorrect password username im log browser password username change password many time still unable login application	Negative	0	1	0
Google Play Store	8d88e33c-d3a3-4575-b8c8-56315039f25e	Not bad	PRAMOJ Thisaru	##########			0	en	us		5	en	bad	Positive	1	0	0
Google Play Store	cfb55062-98fd-469c-873e-9c8e06676160	Good	zahid saddique	##########			0	en	us		5	en	good	Positive	0	0	0
Google Play Store	d09969a6-4010-4495-99f0-a55cf92ca3c5	Good service	Mohd Sabil	##########			0	en	us		5	en	good service	Positive	0	0	0
Google Play Store	c5507ca5-ab61-42e0-9ffe-4775d223eace	Swipe confirm or cancel, it's not working from long time, I'm always try to it	RAHAT ALI MOBILE CRANE OPERATOR	##########			11	en	us		1	en	swipe confirm cancel work long time im always try	Negative	0	1	0
Google Play Store	0a5edc7c-b4b4-4379-bbe2-11b8eb40477f	Nice app's,	Domingo Arasa	##########			0	en	us		5	en	nice apps	Positive	0	0	0
Google Play Store	15b9bbd1-6f34-485f-b39d-d67899c568b9	Username and password are entered whenever I try to login wrong every time Username and Password eroor why The same thing is happening when I reset your password .Not GOOD	HAIDER BROS	##########			0	en	us		1	en	username password enter whenever try login wrong every time username password eroor thing happen reset password good	Negative	0	1	0
Google Play Store	5b901fa4-b5a3-47a3-853a-1a389771cc2f	One of the best quality of service offered by Albilad bank. reliability and responsiveness, I'll specially recommends to all 👏👏👏👏👏👏👏👏👏👏	Mohsin Shah	##########			0	en	us		5	en	one best quality service offer albilad bank reliability responsiveness ill specially recommend	Positive	0	0	0
Google Play Store	f266f6cf-98eb-4c03-852f-923de2a1b7bb	Lovely	Fawzi Radwan	##########			0	en	us		5	en	lovely	Positive	0	0	0
Google Play Store	95e28014-75bf-4ff1-bb4f-06c5340fe06b	Good	Rajesh singh Rajpoot	##########			0	en	us		5	en	good	Positive	0	0	0
Google Play Store	e48010c4-f767-4e03-a071-c8bc4055d59d	Best service	SD HANIF AHMED	##########			0	en	us		5	en	best service	Positive	0	0	0
Google Play Store	847c3e20-483b-4ab8-a662-3cfaa5c2812d	I need help Application not open	Maged magdy nageep Awaad	##########			0	en	us		1	en	need help application open	Negative	0	1	0
Google Play Store	2ad95135-ef2b-4e2a-b9e0-913a35f7e564	Good	Ahmad Zulfkar	##########			0	en	us		4	en	good	Positive	0	0	0
Google Play Store	0b41b83f-9f4d-4ad0-9627-63447a046c0b	Very bad application, sometimes you need to repeat the process three or four times to process it, Very weak and very slow in response, unfortunately I am using because I have money inside, hopefully I will cancel using it soo	Mohaned Bodier	##########			18	en	us		1	en	bad application sometimes need repeat process three four time process weak slow response unfortunately use money inside hopefully cancel use soo	Negative	1	0	1
Google Play Store	97fb3a4c-2bcd-4c4d-8030-53fddfb0e870	Good app	Zihad Ali	##########			0	en	us		5	en	good app	Positive	0	0	0
Google Play Store	36a15288-a8e7-464f-b5fd-bb0cc298150c	Old design	sinan vakayil	##########			0	en	us		1	en	old design	Neutral	1	0	0
Google Play Store	146b1019-87c7-409e-9452-bd52ad8a82d3	Good	Saidalavi Chirayimmal buhaira	##########			0	en	us		5	en	good	Positive	0	0	0
Google Play Store	3705301e-3f42-43dc-9d21-8be0bb976df7	Good	Amjad Farooqi	##########			0	en	us		5	en	good	Positive	0	0	0
Google Play Store	a6cddf25-d28c-43b7-aa8d-567026fbe163	Very good app	Mohammad Monir	##########			0	en	us		5	en	good app	Positive	0	0	0
Google Play Store	74053f2d-253f-4ea9-a895-fa756ceb4002	Good	Gaus Azam	##########			0	en	us		1	en	good	Positive	0	0	0
Google Play Store	95e3e214-c0fc-4926-82f7-2b0ab1096043	Your service is good but some time up date it again	Muhammad Ashraf	##########			0	en	us		4	en	service good time date	Positive	0	0	0
Google Play Store	71397ca5-609e-429f-bb3b-f5e996031228	Good	Adeel Khan	##########			0	en	us		5	en	good	Positive	0	0	0
Google Play Store	6b87afc5-0693-46da-a4c0-1d59e817c08b	I can now login to this app	Moh. Noor Gaddong	##########			1	en	us		5	en	login app	Neutral	0	1	0
Google Play Store	875f9d0e-f85d-4889-ac91-467ef1306996	Not working properly i login my username & password than every time say username or password wrong but every time i put the username & password is correct please solved it😭 التعبان جداً 👎👎👎👎👎👎👎👎👎👎👎👎👎👎👎👎👎👎👎👎👎👎👎👎👎👎👎👎👎👎👎👎👎👎👎👎👎👎👎👎👎👎👎👎👎👎👎👎👎👎👎👎👎👎👎👎👎	MohammaD NadeeM	##########			1	en	us		1	en	work properly login username password every time say username password wrong every time put username password correct please solve	Negative	0	1	0
Google Play Store	49fe7166-2423-4f72-b1ff-31d387ea3c33	Short history, current transaction take long time to show	Tim Alma	##########			0	en	us		3	en	short history current transaction take long time show	Neutral	0	0	1
[truncated: 143 more rows]
