# Supplementary material for: Retrieval-augmented generation analysis of user reviews in Saudi mobile banking apps: a comparative user experience study of iOS and Android
Source: PeerJ journal article supplement (doi:10.7717/peerj-cs.3565), 2026-02-06
Supplement: Android.zip [file fransimobile_final.xlsx]

## Sheet: Sheet 1 - fransimobile_final
fransimobile_final
source	review_id	review_description	user_name	review_date	developer_response	developer_response_date	thumbs_up	language_code	country_code	app_version	rating	en	cleaned_reviews	Sentiment	Satisfaction	Effectiveness	Efficiency
Google Play Store	a7bf8610-6ffd-40dd-aa6b-7c7fb9384f98	It is embarrassing and disappointing that a simple basic application of one of the oldest banks in the kingdom has such a quantity of problems and difficulties in service.	Aziz	##########	عزيزي العميل, يؤسفنا سماع ذلك ونعمل جاهدين على تحسين وتطوير خدماتنا ومنتجاتنا. رضاكم غايتنا	##########	0	en	us		1	ar	embarrass disappoint simple basic application one old bank kingdom quantity problems difficulties service	Negative	1	0	0
Google Play Store	fb31d85b-835e-45b4-939b-093687557dbc	Thank you very much 😊😁	a8chiTecTMajoodiM	##########	عزيزي العميل, نشكركم على ثقتكم بالبنك السعودي الفرنسي و نتطلع دائما لرضا عملائنا	##########	0	en	us		5	ar	thank much	Positive	0	0	0
Google Play Store	8b1d6999-1dd6-4e4b-82f5-6c4527f79be5	There is improvement, thank you.	Mr. Salem	##########	عميلنا العزيز, نشكركم على ثقتكم بالبنك السعودي الفرنسي و نتطلع دائما لرضى عملائنا	##########	0	en	us		4	ar	improvement thank	Positive	0	0	0
Google Play Store	a776ae92-d9de-4de3-82da-58865a52c9a3	Very bad and now it doesn't work. It asks for GPS activation and unfortunately the application was bad before, but it was functioning. Now it has become non-functional.	Hani Youssuf	##########	عزيزي العميل, لنتمكن من مساعدتك يرجى منكم التواصل مع الدعم الفني من خلال البريد الإلكتروني FransiMobileAdmin@alfransi.com.sa تسعدني خدمتك	##########	0	en	us		1	ar	bad doesnt work ask gps activation unfortunately application bad function become nonfunctional	Negative	1	1	0
Google Play Store	767351d3-b038-4bd7-9434-e3454fe52c74	The application is very slow, has a lot of malfunctions, and always puts me in bad situations. It is the worst banking application I have ever tried, unfortunately.	amal alhelally	##########	عزيزي العميل، يؤسفنا سماع ذلك و نعمل جاهدين على تحسين و تطوير خدماتنا و منتجاتنا. رضاكم غايتنا	##########	0	en	us		1	ar	application slow lot malfunction always put bad situations bad bank application ever try unfortunately	Negative	1	1	1
Google Play Store	41d67fb6-60fd-46c3-9a50-aabafd27ee10	The application freezes and it frustrates me honestly, but it works fine on the iPhone, I don't know why.	معاذ عبدالله	##########	عزيزي العميل, لنتمكن من مساعدتك يرجى منكم التواصل مع الدعم الفني من خلال البريد الإلكتروني FransiMobileAdmin@alfransi.com.sa تسعدني خدمتك	##########	0	en	us		1	ar	application freeze frustrate honestly work fine iphone dont know	Negative	1	0	1
Google Play Store	6b178f05-10cd-411f-8361-46288fdce81c	The application is very, very slow and does not allow you to transfer and keeps freezing every now and then.	Faisal ///M	##########	عزيزي العميل, لنتمكن من مساعدتك يرجى منكم التواصل مع الدعم الفني من خلال البريد الإلكتروني FransiMobileAdmin@alfransi.com.sa تسعدني خدمتك	##########	0	en	us		1	ar	application slow allow transfer keep freeze every	Negative	1	0	1
Google Play Store	bc4987df-1ca2-4f39-a83f-bd9b30165360	Please work on improving the performance of the application.	Muawiya Al-Anazi	##########	عزيزي العميل, نشكر لكم تواصلكم وسيتم رفع اقتراحاتكم للإدارات المعنية. رضاكم غايتنا	##########	0	en	us		5	ar	please work improve performance application	Neutral	0	1	0
Google Play Store	28095f5e-a342-4734-90fc-5d95d91dc5a7	It is slow. Each page takes a minute to load.	Muath Algohani	##########	عزيزي العميل، يؤسفنا سماع ذلك و نعمل جاهدين على تحسين و تطوير خدماتنا و منتجاتنا. رضاكم غايتنا	##########	0	en	us		1	ar	slow page take minute load	Negative	0	0	1
Google Play Store	68bab651-0f82-4836-9462-2895a319ad41	Despite the fact that the code and password are correct, I am unable to log in as a message appears saying that the code or password is incorrect. I have entered before. Worst application.	Sam Note	##########	عزيزي العميل، لنتمكن من مساعدتك يرجى منكم التواصل مع الدعم الفني من خلال البريد الإلكتروني FransiMobileAdmin@alfransi.com.sa. نسعد بخدمتك	2023-08-06 05:43:00	0	en	us		1	ar	despite fact code password correct unable log message appear say code password incorrect enter bad application	Negative	1	1	0
Google Play Store	c7f88f8c-dc05-4b06-a8a2-b0aeac1eba2e	A primitive and slow application.	Mohammed Almakrani	##########	عزيزي العميل, يؤسفنا سماع ذلك و نعمل جاهدا على تحسين و تطوير خدماتنا و منتجاتنا. رضاكم هي غايتنا.	##########	1	en	us		1	ar	primitive slow application	Negative	1	0	1
Google Play Store	e383fe69-7742-40ec-bbcd-279d262ee9dc	The worst and slowest banking application in Saudi Arabia.	Na Ma	##########	عزيزي العميل, يؤسفنا سماع ذلك ونعمل جاهدين على تحسين وتطوير خدماتنا ومنتجاتنا. رضاكم غايتنا	##########	1	en	us		1	ar	bad slow bank application saudi arabia	Negative	1	0	1
Google Play Store	7e93df2b-f95f-41f4-bc98-a1755431ed8c	Very bad, very slow and often freezes. The response of the application is slow.	Abdulrahman	2023-07-04 01:07:00	عزيزي العميل, يؤسفنا سماع ذلك و نعمل جاهدا على تحسين و تطوير خدماتنا و منتجاتنا. رضاكم هي غايتنا.	2023-07-04 06:14:00	1	en	us		1	ar	bad slow often freeze response application slow	Negative	1	0	1
Google Play Store	6e0d5eb6-7583-4969-8c7f-d4c8b5d2a79d	The same problems keep recurring without any solutions, unfortunately.	Saud Alenazi	##########	Dear customer, to assist you, please contact our support team through the following email address FransiMobileAdmin@alfransi.com.sa. We are happy to help you	##########	0	en	us		1	ar	problems keep recur without solutions unfortunately	Negative	0	1	1
Google Play Store	f132e7fd-b207-4192-b87a-48421a756a97	the worst application.	Luay Awami	##########	عزيزي العميل، يؤسفنا سماع ذلك و نعمل جاهدين على تحسين و تطوير خدماتنا و منتجاتنا. رضاكم غايتنا	##########	0	en	us		1	ar	bad application	Negative	1	0	0
Google Play Store	ae34463c-b151-4279-bfcb-8944b7833862	Slow	talal atteiah	2023-06-07 08:39:00	عزيزي العميل, يؤسفنا سماع ذلك و نعمل جاهدا على تحسين و تطوير خدماتنا و منتجاتنا. رضاكم هي غايتنا.	##########	0	en	us		1	ar	slow	Neutral	0	0	1
Google Play Store	d930bf34-b019-4e52-b5fd-e5887fd34146	Your application is broken/faulty.	Omar Alghamdi	##########	عزيزي العميل، لنتمكن من مساعدتك يرجى منكم التواصل مع الدعم الفني من خلال البريد الإلكتروني FransiMobileAdmin@alfransi.com.sa. نسعد بخدمتك	##########	0	en	us		1	ar	application brokenfaulty	Negative	1	0	0
Google Play Store	36a20312-08a4-4bf3-9401-e0a64b97d579	Very slow. The last time the program was actually developed was 4 years ago, and in the field of applications, this is considered a very long period. Why doesn't the bank provide a unique customer experience through the application? In the past 8 years, I have only entered a branch twice, but I use the application weekly, so it should be continuously developed.	A Google user	##########	عزيزي العميل، يؤسفنا سماع ذلك و نعمل جاهدين على تحسين و تطوير خدماتنا و منتجاتنا. رضاكم غايتنا	##########	22	en	us		1	ar	slow last time program actually develop years ago field applications consider long period doesnt bank provide unique customer experience application past years enter branch twice use application weekly continuously develop	Negative	1	0	1
Google Play Store	342e750b-6ac2-4d28-91c9-c5ab9f6446c2	When will the application be updated? The application is very, very slow. I have deleted the program several times and reinstalled it, but it is still slow.	Khaled Almshari	##########	عزيزي العميل, يؤسفنا سماع ذلك ونعمل جاهدين على تحسين وتطوير خدماتنا ومنتجاتنا. رضاكم غايتنا	##########	1	en	us		1	ar	application update application slow delete program several time reinstall still slow	Negative	0	0	1
Google Play Store	68163c71-c3f3-49ce-8551-f458c248eb68	The application hangs a lot due to lagging. Because of the lagging, I mistakenly transferred an amount to the wrong person, even though they had selected the correct name from the list of beneficiaries. Of course, the bank refused to reverse the transaction. No one compensates me for the amount... nobody.	Mohamad Sheikh Dib	##########	لخدمتك بشكل أفضل فضلاً التواصل مع خدمة الهاتف المصرفي - التواصل مع فرنسي فون: 8001242121. - اختيار: 1 لخدمة الهاتف المصرفي (وتسجيل الدخول للخدمة). - اختيار خيار من القائمة الرئيسية (الحسابات على سبيل المثال). - اختيار علامة النجمة للتحدث مع ممثل خدمة العملاء. نتمنى لك يوم سعيد	##########	0	en	us		1	ar	application hang lot due lag lag mistakenly transfer amount wrong person even though select correct name list beneficiaries course bank refuse reverse transaction one compensate amount nobody	Negative	0	1	1
Google Play Store	7aa76ccf-57be-4e8c-97f6-a75c57d3e003	Beware of this bank, unfortunately, I fell victim to fraud with my credit card. Initially, they said that if I use the card for purchases exceeding 20,000 riyals, the following year would be free of charge. Afterwards, I was surprised to find that they deducted 900 riyals for card renewal. When I complained, they claimed that they actually meant 60,000 riyals, not 20,000.	Hicham Elhalouy	2023-05-04 09:24:00			0	en	us		1	ar	beware bank unfortunately fell victim fraud credit card initially say use card purchase exceed riyals follow year would free charge afterwards surprise find deduct riyals card renewal complain claim actually mean riyals	Negative	1	1	0
Google Play Store	86b55aa5-889e-4302-904f-74d1fa7437c7	One of the worst banks when it comes to login issues, messages, and accounts being hacked. You go along with it and then they tell you that they locked your account for security reasons. The steps are: 1. Activate the account. 2. Log in to the account. 3. As soon as you receive the code message... you enter the code... they tell you your account has been locked for exceeding the number of attempt…	Sami Yasin	##########	عزيزي العميل، يؤسفنا سماع ذلك و نعمل جاهدين على تحسين و تطوير خدماتنا و منتجاتنا. رضاكم غايتنا	##########	0	en	us		1	ar	one bad bank come login issue message account hack go along tell lock account security reason step activate account log account soon receive code message enter code tell account lock exceed number attempt enter message start cycle	Negative	1	1	0
Google Play Store	7f0eb66a-dd0f-42a6-a860-32286168bcb8	Very bad and very slow app. I spent half an hour trying to transfer money and it didn't respond. In the end, I'm sorry, I'll try again.	Arabiِ SA	##########	عزيزي العميل، لنتمكن من مساعدتك يرجى منكم التواصل مع الدعم الفني من خلال البريد الإلكتروني FransiMobileAdmin@alfransi.com.sa. نسعد بخدمتك	##########	0	en	us		1	ar	bad slow app spend half hour try transfer money didnt respond end im sorry ill try	Negative	1	1	1
Google Play Store	acb74e98-438a-4d43-a723-631d37213b00	The application is very slow when logging in, as well as when performing operations like paying bills or making card payments. It takes a long time to process. Please make the application more flexible.	Maher Suleiman	##########	عزيزي العميل، يؤسفنا سماع ذلك و نعمل جاهدين على تحسين و تطوير خدماتنا و منتجاتنا. رضاكم غايتنا	##########	0	en	us		1	ar	application slow log well perform operations like pay bill make card payments take long time process please make application flexible	Negative	1	1	1
Google Play Store	f8715b95-f054-407c-ac85-3332f259a7e2	There is a very long delay in accessing my account. Please find a solution for the delay in logging into my account and the lagging and slowness.	Waheed Usman	##########	عزيزي العميل, لنتمكن من مساعدتك يرجى التواصل مع الدعم الفني من خلال البريد الإلكتروني FransiMobileAdmin@alfransi.com.sa. نسعد بخدمتك	##########	0	en	us		1	ar	long delay access account please find solution delay log account lag slowness	Negative	0	0	1
Google Play Store	9c22702f-0f4e-49e1-8b5f-508d55c53bca	The application is very bad. Every time I try to create an account, it doesn't accept it.	Rayanoo	##########			0	en	us		1	ar	application bad every time try create account doesnt accept	Negative	1	1	0
Google Play Store	673a9f7c-0d4f-486f-9d51-accd56c1ee89	Why was the feature of displaying the card number in the application cancelled? How will I use the card now?	Endodonter	##########			0	en	us		2	ar	feature display card number application cancel use card	Negative	0	1	0
Google Play Store	0f99f2ac-601d-4d12-b447-d954ff9b87b8	The application is very bad compared to other banks.	hakeem sakran	##########			0	en	us		1	ar	application bad compare bank	Negative	1	0	0
Google Play Store	f8e5724d-0077-4853-90b2-c50541af6c5d	The application is very slow and crashes. It needs development and the addition of new features to compete with other banks.	Abdulaziz Al-Najrani	##########			1	en	us		3	ar	application slow crash need development addition new feature compete bank	Negative	1	1	1
Google Play Store	f78b574c-9a51-4033-a008-8fd6b889b2ea	Very very Bad, *taking Long time *every single action is failed It is Bad by all means. It is extremely bad and to the extreme limits. *First, it takes a long time just to enter, and then it kicks me out. *Every attempt I make fails. *All my rent payments and other things are delayed because of it. I strongly advise against it; it is nothing but a garbage word with very little value.	tiny titan	##########			0	en	us		1	ar	bad take long time every single action fail bad mean extremely bad extreme limit first take long time enter kick every attempt make fail rent payments things delay strongly advise nothing garbage word little value	Negative	1	1	1
Google Play Store	4435c911-e4bc-4c05-86c3-c5b75a85fc4e	The worst application ever.	Sadiq Al Ismail	##########			0	en	us		1	ar	bad application ever	Negative	1	0	0
Google Play Store	6d78dd25-14b1-48fb-93ac-729ff8ee420b	Slow	Kumail Almohsen	##########			0	en	us		2	ar	slow	Neutral	0	0	1
Google Play Store	00818fdc-c037-4db9-ab41-4b878446586a	The latest update!!!!	Mohammed Baabaad	##########			0	en	us		2	ar	late update	Positive	0	1	0
Google Play Store	ae70aee1-5249-4bfd-ade2-2d89ff3e9503	I cannot download the account statement PDF file, and I must visit the bank.	Maythaa Ibrahim	##########			0	en	us		1	ar	download account statement pdf file must visit bank	Negative	0	1	0
Google Play Store	90cacaad-7f5d-404c-960e-ab0f3a26deea	It doesn't open for me.	khalid ahmad	##########			0	en	us		1	ar	doesnt open	Negative	0	1	0
Google Play Store	009f0a43-9d93-4510-b86c-80891222f827	The application still needs significant development, it is very slow to complete operations, and many times I need to log out and log back in to complete two operations.	Arch 1969	##########			0	en	us		1	ar	application still need significant development slow complete operations many time need log log back complete two operations	Negative	1	0	1
Google Play Store	0f3d0429-148c-4c2f-bb7b-6aaff4ee07ce	Oh donkeys, we can't access the app after the update. I don't know why this bank is so behind in its applications!	Sniper 4	##########			0	en	us		1	ar	oh donkeys cant access app update dont know bank behind applications	Negative	0	1	0
Google Play Store	061861d6-0ec8-4c53-a706-86b78efe0766	This is either a bank application or fake. It's slow, crashes, and forget about paying two bills without closing and reopening the app. You guys need a training session with the designers of Al Rajhi Bank application, I swear.	Mohammed MASHYAKHI	##########			0	en	us		1	ar	either bank application fake slow crash forget pay two bill without close reopen app guy need train session designers al rajhi bank application swear	Negative	0	1	1
Google Play Store	59d577ca-bade-42c9-b096-540746575a36	I wish you would add the ability to print a copy of the transaction receipt from the transaction history.	Mahmoud Saleh	##########			0	en	us		4	ar	wish would add ability print copy transaction receipt transaction history	Neutral	0	1	0
Google Play Store	6e344582-e5a6-4ad8-88b6-c1bcb01ad02c	There is a major decline in the login method of the application. Saving the username does not work. The auto-fill for the password does not work. Entering the authentication code does not work.	Abdullah Hijazi	##########			0	en	us		3	ar	major decline login method application save username work autofill password work enter authentication code work	Negative	0	1	0
Google Play Store	5dc225e4-9ab7-4161-a42a-e2857ddbd06e	Unfortunately, from bad to worse.	أبو خالد Abo Khld	##########			0	en	us		1	ar	unfortunately bad bad	Negative	1	0	0
Google Play Store	7c12555a-4fa7-4401-b59f-3d06eae339f6	They called and registered a bad service complaint for me. When I called them, they told me to go to the branch. I went to the branch and they told me to call a number. Their service is bad. They said they would review my complaint and I haven't received a response until now.	رغد العنزي	##########			1	en	us		1	ar	call register bad service complaint call tell go branch go branch tell call number service bad say would review complaint havent receive response	Negative	1	1	0
Google Play Store	f1e9edf7-7554-449c-89c0-f74f25f45eb6	It always hangs and doesn't open, and it delays in sending the code. This program exhausts me, I am changing banks because of it. 😓	Hassan Alredha	##########			1	en	us		1	ar	always hang doesnt open delay send code program exhaust change bank	Negative	1	1	1
Google Play Store	ed05fc83-2cfe-41e7-9a76-e05a9c663bf2	Infertile bank	Hussam R (Sam)	2022-05-07 08:47:00			1	en	us		1	ar	infertile bank	Neutral	1	0	0
Google Play Store	94348341-8acd-4714-b2bd-6ac79adfa79f	Many problems and it is not possible to pay the violations due to the appearance of a white screen and there is no field to enter the activation number for the operation and many other things unfortunately the version does not work with the Galaxy Fold Z3 when the device is turned on its large screen.	Riyadh Al-Farhan (Dr. Riyadh)	##########	عزيزي العميل، يهمنا خدمتكم ونأمل منك تجربة النسخة الجديدة من خدمة فرنسي موبايل. الرجاء في حال واجهتك مشكلة ارسالها مباشرة للبريد الالكتروني FransiMobileAdmin@alfransi.com.sa اذا اردت ان نتصل بك. اضف رقم هاتفك الجوال عند ارسالك للبريد الإلكتروني	##########	1	en	us		1	ar	many problems possible pay violations due appearance white screen field enter activation number operation many things unfortunately version work galaxy fold z device turn large screen	Negative	0	1	0
Google Play Store	841c5d5b-1693-441f-8b02-b7265eed06b5	The program needs to be deleted and re-downloaded after the update, in order to work properly. 👏	A s	##########			0	en	us		5	ar	program need delete redownloaded update order work properly	Neutral	0	1	0
Google Play Store	8846e6ab-5af6-4b70-a61f-11f7912e2a0a	Very beautiful and easy.	Louay Zarqa	##########			0	en	us		5	ar	beautiful easy	Positive	0	0	0
Google Play Store	6091b352-3d50-4d49-952a-656177f12ed8	bad, by God.	ENG.Riyadh Abdullah	##########			0	en	us		1	ar	bad god	Negative	1	0	0
Google Play Store	794f6199-e752-48b8-b4ec-485e31d13ded	The application is very poor, 24 hours of problems unfortunately.	ibrahem alajlan	##########			0	en	us		1	ar	application poor hours problems unfortunately	Negative	1	0	0
Google Play Store	c3bff6e8-4703-48dc-a260-2271aed3be7e	Very bad, not working and needs urgent repair.	Ibraham hadi	##########			0	en	us		1	ar	bad work need urgent repair	Negative	1	1	0
Google Play Store	ec553de4-b608-4f6c-b19c-1bcddbbec8d8	After the last application update, it doesn't work properly.	sam sam	##########			0	en	us		2	ar	last application update doesnt work properly	Negative	0	1	0
Google Play Store	f0ef9643-2ae7-4644-a5ed-dba06d243109	The application is very slow after the latest update. You need to repeat the commands more than once for it to respond to you.	Ghafor رائعة	##########			0	en	us		1	ar	application slow late update need repeat command respond	Negative	0	0	1
Google Play Store	e98fb311-7ff0-4956-b8e8-9f65e12c7502	Ramadan's update is bad, the code messages do not connect.	-:{ يقيني بالله يقيني }:-	##########			1	en	us		1	ar	ramadans update bad code message connect	Negative	1	1	0
Google Play Store	9421e8db-0c8c-4e30-9d41-4dc8ecd01443	The program needs real developers, not beginners. It is slow, complicated, and has many errors. It deserves many one-star reviews. Update: With every version and update, the same problems keep recurring, and honestly, it is not a reliable application at all. It has many problems and most of the time it doesn't work despite the frequent updates. Those who try other banking applications know that t…	Yazeed	##########	عزيزي العميل، يهمنا خدمتكم ونأمل منك تجربة النسخة الجديدة من خدمة فرنسي موبايل. الرجاء في حال واجهتك مشكلة ارسالها مباشرة للبريد الالكتروني FransiMobileAdmin@alfransi.com.sa اذا اردت ان نتصل بك. اضف رقم هاتفك الجوال عند ارسالك للبريد الإلكتروني	##########	0	en	us		1	ar	program need real developers beginners slow complicate many errors deserve many onestar review update every version update problems keep recur honestly reliable application many problems time doesnt work despite frequent update try bank applications know french one bad among without doubt	Negative	1	1	1
Google Play Store	551c9a4e-f4bb-421a-a847-fcc52b414f37	The bank is very bad and the mobile application does not have the latest update to input the tax number or the pledge of no taxes. Also, when calling the complaints number, no one answers. Very, very bad.	Mohamed Ragab	##########			0	en	us		1	ar	bank bad mobile application late update input tax number pledge tax also call complaints number one answer bad	Negative	1	1	0
Google Play Store	7b643308-750b-4db7-8537-506218cfa3eb	Oh brother, this application is lame, it takes a lot of time to switch from one page to another. Pull yourself together and steal some professionalism from Al Rajhi Bank's application...	abdullah abdullah	##########			0	en	us		1	ar	oh brother application lame take lot time switch one page another pull together steal professionalism al rajhi bank application	Negative	1	0	1
Google Play Store	a45d981a-c46a-4efa-851d-4dfeadd17d36	The worst and silliest application.	Farah Alothman	##########			0	en	us		1	ar	bad silly application	Negative	1	0	0
Google Play Store	e7e539b5-4113-4c8c-b592-469c09d56146	Excellent French bank.	حليلاوي وافتخر ”حليلاوي“	##########	عزيزي العميل، نشكركم على ثقتكم بالبنك السعودي الفرنسي ونتطلع دائما لرضا عملائنا.	##########	0	ar	us		5	ar	excellent french bank	Positive	0	0	0
Google Play Store	7c447813-905d-46a5-a3d3-93ce32a24676	The application is still not opening and it's very bad. What is the solution? Has the problem been resolved by the bank?	ذياب الحميدان	##########	عزيزي العميل، لنتمكن من مساعدتك يرجى منكم التواصل مع الدعم الفني من خلال البريد الإلكتروني FransiMobileAdmin@alfransi.com.sa. نسعد بخدمتك	##########	0	ar	us		1	ar	application still open bad solution problem resolve bank	Negative	1	0	0
Google Play Store	4544bba1-d0bb-433d-844e-560babcac499	Splendor	Adel AlAwad	##########	عميلنا العزيز, نشكركم على ثقتكم بالبنك السعودي الفرنسي و نتطلع دائما لرضى عملائنا	##########	0	ar	us		4	ar	splendor	Positive	0	0	0
Google Play Store	2a8f7d93-5d7a-4936-ae96-d907bad4d1c3	The application is not working at all. It only opens the interface and nothing happens afterwards.	Zohair	##########	عزيزي العميل، لنتمكن من مساعدتك يرجى منكم التواصل مع الدعم الفني من خلال البريد الإلكتروني FransiMobileAdmin@alfransi.com.sa. نسعد بخدمتك	##########	0	ar	us		1	ar	application work open interface nothing happen afterwards	Negative	0	1	0
Google Play Store	8fbd16be-137b-4a48-811a-32e2ec1ba061	Excellent	mohammed ali	##########	عزيزي العميل, نشكركم على ثقتكم بالبنك السعودي الفرنسي و نتطلع دائما لرضا عملائنا	##########	0	ar	us		5	ar	excellent	Positive	0	0	0
Google Play Store	98c72a0f-2afa-493b-901d-6c76e279e47c	Very bad application that does not support the Arabic language.	ABORIYAN ABORIYAN	##########	عزيزي العميل، يؤسفنا سماع ذلك و نعمل جاهدين على تحسين و تطوير خدماتنا و منتجاتنا. رضاكم غايتنا	##########	0	ar	us		1	ar	bad application support arabic language	Negative	1	0	0
Google Play Store	fdaeab9c-32cc-4e10-b4d2-21847f533abf	The application is very bad and unresponsive to transfers and very slow.	ماجد المصيلح	##########	عميلنا العزيز, لخدمتك بشكل أفضل نأمل التواصل مع فرنسي فون: 8001242121. شكرا لتواصلك	##########	0	ar	us		1	ar	application bad unresponsive transfer slow	Negative	1	0	1
Google Play Store	8d56e2f3-bdb2-4db0-b95a-64b74e555965	The application is the worst, the operations are unbelievably slow, and it keeps freezing constantly. 👎👎👎	Bejad	2023-09-09 03:54:00	عزيزي العميل، يؤسفنا سماع ذلك و نعمل جاهدين على تحسين و تطوير خدماتنا و منتجاتنا. رضاكم غايتنا	##########	0	ar	us		1	ar	application bad operations unbelievably slow keep freeze constantly	Negative	1	0	1
Google Play Store	d120c6af-7868-4ba0-b6e3-2a3c13faf420	The application has been very slow for a long time and the problem has not been resolved. The services of the application have become boring, and accessing the account is only possible after activating the location tracking service... You guys should remember that Tawakkalna and all other bank applications do not require activating this service. Additionally, the system in the bank is frequently …	am am	##########	عزيزي العميل، يهمنا خدمتكم ونأمل منك تجربة النسخة الجديدة من خدمة فرنسي موبايل. الرجاء في حال واجهتك مشكلة ارسالها مباشرة للبريد الالكتروني FransiMobileAdmin@alfransi.com.sa اذا اردت ان نتصل بك. اضف رقم هاتفك الجوال عند ارسالك للبريد الإلكتروني	##########	3	ar	us		1	ar	application slow long time problem resolve service application become bore access account possible activate location track service guy remember tawakkalna bank applications require activate service additionally system bank frequently disrupt due maintenance message concern whether due security vulnerabilities problems account balance amount transfer another bank security	Negative	1	1	1
Google Play Store	5e6ac47c-edeb-42c2-afcb-a3f5426633e3	He always asks me to turn on the GPS while it is already on and functioning. There seems to be a problem with the application.	MOHAMMED ALBOSHI	##########	عزيزي العميل، لنتمكن من مساعدتك يرجى منكم التواصل مع الدعم الفني من خلال البريد الإلكتروني FransiMobileAdmin@alfransi.com.sa. نسعد بخدمتك	##########	0	ar	us		1	ar	always ask turn gps already function seem problem application	Negative	0	1	0
Google Play Store	109ce99f-8a82-4279-a45d-1409a67eafd8	What opens the application?	موسى الندوي	2023-09-05 07:55:00	عزيزي العميل، لنتمكن من مساعدتك يرجى منكم التواصل مع الدعم الفني من خلال البريد الإلكتروني FransiMobileAdmin@alfransi.com.sa. نسعد بخدمتك	2023-09-05 09:47:00	0	ar	us		1	ar	open application	Neutral	0	1	0
Google Play Store	f4c5e621-7e40-4407-a5ff-12b15954d45f	The application has a problem, it does not open and asks for location activation, even though the location is already activated. Please provide a solution as I have sent an email and there has been no response.	خالر الشريف	##########	عميلنا العزيز, لخدمتك بشكل أفضل نأمل التواصل مع فرنسي فون: 8001242121. شكرا لتواصلك	##########	0	ar	us		1	ar	application problem open ask location activation even though location already activate please provide solution send email response	Negative	0	1	0
Google Play Store	7e62f7ae-4e5a-4435-ab48-342c69e5d37f	I do not recommend it, it burdens me every day and causes me distress.	amyr Am	##########	عزيزي العميل, يؤسفنا سماع ذلك و نعمل جاهدين على تحسين و تطوير خدماتنا و منتجاتنا. رضاكم هي غايتنا.	##########	0	ar	us		1	ar	recommend burden every day cause distress	Negative	1	0	0
Google Play Store	bb1717c1-b4cd-4f89-9d98-b28d04cb2340	The application does not open, it hangs on the main interface page.	Bandar Abdullah	##########	عزيزي العميل, لنتمكن من مساعدتك يرجى منكم التواصل مع الدعم الفني من خلال البريد الإلكتروني FransiMobileAdmin@alfransi.com.sa تسعدني خدمتك	##########	0	ar	us		1	ar	application open hang main interface page	Neutral	0	1	1
Google Play Store	954ad009-dc65-4e59-8b1f-73954889a817	It doesn't work at all.	soul & ideas	##########	عزيزي العميل, لنتمكن من مساعدتك يرجى منكم التواصل مع الدعم الفني من خلال البريد الإلكتروني FransiMobileAdmin@alfransi.com.sa تسعدني خدمتك	##########	0	ar	us		1	ar	doesnt work	Negative	0	1	0
Google Play Store	288ceb21-09d3-40d8-8134-78a26f89031a	The worst banking application ever. It closes every week for updates, but we don't see any changes. To make matters worse, it demands that you activate the website before logging in. All bank applications are improving except for Banque Saudi Fransi, which is getting worse. The application's difficulty level has increased, and it takes time to search for the desired service within it.	سند الرويلي.	##########	عزيزي العميل, يؤسفنا سماع ذلك و نعمل جاهدا على تحسين و تطوير خدماتنا و منتجاتنا. رضاكم هي غايتنا.	##########	0	ar	us		1	ar	bad bank application ever close every week update dont see change make matter bad demand activate website log bank applications improve except banque saudi fransi get bad applications difficulty level increase take time search desire service within	Negative	1	1	0
Google Play Store	80a8bf1a-42f5-4305-a315-2dcb00575eab	The application is very slow and has many errors indeed.	Nasser	##########	عزيزي العميل، يؤسفنا سماع ذلك و نعمل جاهدين على تحسين و تطوير خدماتنا و منتجاتنا. رضاكم غايتنا	##########	0	ar	us		1	ar	application slow many errors indeed	Negative	0	1	1
Google Play Store	cae0434d-dbfa-403b-9af7-cda8c351d38e	I do not recommend the bank, not just the application. The bank's service is very slow and the services are not good.	KHALAF ALRWUAILIY	##########	عزيزي العميل، يؤسفنا سماع ذلك و نعمل جاهدين على تحسين و تطوير خدماتنا و منتجاتنا. رضاكم غايتنا	##########	0	ar	us		1	ar	recommend bank application bank service slow service good	Negative	1	0	1
Google Play Store	7ef956b8-5fa3-4a2e-ace7-c580a0366781	If someone has a GPS problem, they can fix it through the settings on their mobile phone. They should go to the program, open the locations, go back to the program, and it will open for you.	جعفر علي العبود	##########	عزيزي العميل, لنتمكن من مساعدتك يرجى منكم التواصل مع الدعم الفني من خلال البريد الإلكتروني FransiMobileAdmin@alfransi.com.sa تسعدني خدمتك	##########	1	ar	us		5	ar	someone gps problem fix settings mobile phone go program open locations go back program open	Neutral	0	1	0
Google Play Store	34166199-abaf-4288-bdf7-a9d71bc55abd	There is an update with problems, it does not open easily. If it opens, it does not let the user enter the application unless after many attempts, and it gives an error message that the username or password is incorrect. Fix your work, or else we will move our accounts to a bank with an easier application.	RNAN ALFARES	##########	عزيزي العميل، يؤسفنا سماع ذلك و نعمل جاهدين على تحسين و تطوير خدماتنا و منتجاتنا. رضاكم غايتنا	##########	0	ar	us		1	ar	update problems open easily open let user enter application unless many attempt give error message username password incorrect fix work else move account bank easy application	Negative	0	1	0
Google Play Store	9b9b5a8d-5f0d-46cd-80d2-ca74ceca5cf8	sadsdfF	Mohmed Mohme	##########			0	ar	us		1	ar	sadsdff	Negative	1	0	0
Google Play Store	4f068bd7-08ae-4e13-bb64-33c7193e88d8	The application is working. Thank you for your efforts.	ابو سلطان	##########	عزيزي العميل, لنتمكن من مساعدتك يرجى منكم التواصل مع الدعم الفني من خلال البريد الإلكتروني FransiMobileAdmin@alfransi.com.sa تسعدني خدمتك	##########	0	ar	us		5	ar	application work thank efforts	Positive	0	1	0
Google Play Store	d4ebd890-b1ac-4d78-8acd-e553250fbbc6	Every time I open the application, it tells me to open GBS and try again, even though the program itself is already open and it's the worstprogram.	putri allas chonnal	##########	عزيزي العميل, لنتمكن من مساعدتك يرجى التواصل مع الدعم الفني من خلال البريد الإلكتروني FransiMobileAdmin@alfransi.com.sa. نسعد بخدمتك	##########	0	ar	us		1	ar	every time open application tell open gbs try even though program already open worstprogram	Negative	1	1	0
Google Play Store	283460fc-17e6-4f87-8f46-aa87a386f1f6	The application does not open.	وكالة المرش	##########	مرحبا, لخدمتك بشكل أفضل نأمل التواصل مع فرنسي فون: 8001242121. شكرا لتواصلك	##########	0	ar	us		1	ar	application open	Neutral	0	1	0
Google Play Store	28a27f40-3e2b-443b-a46c-d28f608c426f	He doesn't want to open, it's been a few days for him.	Ruqayah Al dhamen	##########	مرحبا عزيزتي, لخدمتك بشكل أفضل نأمل التواصل مع فرنسي فون: 8001242121. شكرا لتواصلك	##########	0	ar	us		1	ar	doesnt want open days	Negative	0	1	0
Google Play Store	2320c1a1-331c-4b40-beb7-c71adffb177f	There is a little bit of a problem.	ابو زياد	##########	عزيزي العميل, يؤسفنا سماع ذلك و نعمل جاهدين على تحسين و تطوير خدماتنا و منتجاتنا. رضاكم هي غايتنا.	##########	0	ar	us		4	ar	little bite problem	Negative	1	0	0
Google Play Store	1ba27392-5bcc-4ed6-a475-fdd5df48099e	They excel in dealing with utmost ease and sophistication in service.	الدوري السعودي المحترفين	##########	عزيزي العميل, نشكركم على ثقتكم بالبنك السعودي الفرنسي و نتطلع لرضاكم دائما	##########	0	ar	us		5	ar	excel deal utmost ease sophistication service	Positive	0	0	0
Google Play Store	83d8569c-90d2-4eef-8250-48da44663e76	If someone faces a problem with logging in, they should delete the application, reinstall it, and their problem will be solved.	علي الحامد	##########			0	ar	us		4	ar	someone face problem log delete application reinstall problem solve	Neutral	0	1	0
Google Play Store	e7446fe9-55ac-428e-9d40-29b6a0329860	There is a problem with the application.	أمجد عطيه	##########	عزيزي العميل, لنتمكن من مساعدتك يرجى التواصل مع الدعم الفني من خلال البريد الإلكتروني FransiMobileAdmin@alfransi.com.sa. نسعد بخدمتك	##########	0	ar	us		1	ar	problem application	Negative	0	1	0
Google Play Store	f1e23f8f-daa1-42ce-90e8-7efd5631a206	The application is not working after the update and continues to request the location update despite the fact that the location service is functioning. However, the application does not recognize it.	Hosam Sh.	##########	عزيزي العميل, لنتمكن من مساعدتك يرجى التواصل مع الدعم الفني من خلال البريد الإلكتروني FransiMobileAdmin@alfransi.com.sa. نسعد بخدمتك	##########	0	ar	us		1	ar	application work update continue request location update despite fact location service function however application recognize	Negative	0	1	0
Google Play Store	af907860-a135-438a-99b7-ddfa16de807a	Very bad application and bad service.	Mohammed Alasiri	##########	عزيزي العميل, يؤسفنا سماع ذلك ونعمل جاهدين على تحسين وتطوير خدماتنا ومنتجاتنا. رضاكم غايتنا	##########	0	ar	us		1	ar	bad application bad service	Negative	1	0	0
Google Play Store	3b9e8c3a-db1e-41ab-92fe-2a3045b8688b	The application is useless. I try to log in multiple times and I receive a message saying that the username and password are incorrect. However, they are actually correct since I can log into French Plus without any problems. But the application does not allow me to log in.	Amoon Hmb	##########	عزيزي العميل, لنتمكن من مساعدتك يرجى منكم التواصل مع الدعم الفني من خلال البريد الإلكتروني FransiMobileAdmin@alfransi.com.sa تسعدني خدمتك	##########	10	ar	us		1	ar	application useless try log multiple time receive message say username password incorrect however actually correct since log french plus without problems application allow log	Negative	1	1	0
Google Play Store	2fa712de-73b4-4d26-a379-f76d2c6c4523	The application is not working and it requires the JBS to run. Even after running the JBS, it still does not work. I cannot pay the bills. Please provide assistance on this matter. It does not even deserve a star.	MAHMOOD AL-ASMAIL	##########	عزيزي العميل, لنتمكن من مساعدتك يرجى منكم التواصل مع الدعم الفني من خلال البريد الإلكتروني FransiMobileAdmin@alfransi.com.sa تسعدني خدمتك	##########	0	ar	us		1	ar	application work require jbs run even run jbs still work pay bill please provide assistance matter even deserve star	Negative	0	1	0
Google Play Store	47220837-81b6-4739-a7a1-80a70599cbb6	Very annoying and constant criticism, and no benefit is gained from it.	خالد محمد	##########	عزيزي العميل, يؤسفنا سماع ذلك و نعمل جاهدا على تحسين و تطوير خدماتنا و منتجاتنا. رضاكم هي غايتنا.	##########	0	ar	us		1	ar	annoy constant criticism benefit gain	Negative	1	0	0
Google Play Store	ec9382b2-cd1e-46a6-8c8b-1eaa6f66ae40	After the update, it is very bad, unresponsive, slow, and the frustration caused me to break my mobile phone.	محمود احمد	##########	عزيزي العميل, يؤسفنا سماع ذلك و نعمل جاهدا على تحسين و تطوير خدماتنا و منتجاتنا. رضاكم هي غايتنا.	##########	0	ar	us		1	ar	update bad unresponsive slow frustration cause break mobile phone	Negative	1	0	1
Google Play Store	76f806d9-45af-49a1-bbfa-03de024e70b7	The application has not been working for a week, why?	slankawysm slankawysm	##########	عزيزي العميل, لنتمكن من مساعدتك يرجى منكم التواصل مع الدعم الفني من خلال البريد الإلكتروني FransiMobileAdmin@alfransi.com.sa تسعدني خدمتك	##########	0	ar	us		1	ar	application work week	Negative	0	1	0
Google Play Store	8d2392c2-fa42-4d6b-af74-42b307cc12d8	The new application is very bad and it does not open even though the website is updated. Please solve the problem as quickly as possible.	ام كنان فلاتة	##########	عزيزي العميل, يؤسفنا سماع ذلك و نعمل جاهدا على تحسين و تطوير خدماتنا و منتجاتنا. رضاكم هي غايتنا.	##########	0	ar	us		1	ar	new application bad open even though website update please solve problem quickly possible	Negative	1	1	0
Google Play Store	f521658a-0d87-4d75-8157-c0db2f97e689	The application is very bad and doesn't work at all.	Mahmoud Ahmed	##########	عزيزي العميل, لنتمكن من مساعدتك يرجى منكم التواصل مع الدعم الفني من خلال البريد الإلكتروني FransiMobileAdmin@alfransi.com.sa تسعدني خدمتك	##########	0	ar	us		1	ar	application bad doesnt work	Negative	1	1	0
Google Play Store	ed71006e-cb1c-41a6-abac-3a1e1188f869	The application is very bad, and I'm trying to pay the bills but it keeps asking for GPS activation. Even after activating GPS, it still doesn't work. The problem is that this is my main account. Now I'm worried about having my services cut off due to non-payment. I really don't understand how a banking app can be released without checking for any errors in the application.	Fahad Fal	##########	عزيزي العميل, لنتمكن من مساعدتك يرجى منكم التواصل مع الدعم الفني من خلال البريد الإلكتروني FransiMobileAdmin@alfransi.com.sa تسعدني خدمتك	##########	38	ar	us		1	ar	application bad im try pay bill keep ask gps activation even activate gps still doesnt work problem main account im worry service cut due nonpayment really dont understand bank app release without check errors application	Negative	1	1	0
Google Play Store	a6450162-3db9-4df1-aa16-79fe9359685e	Very very very bad, slow and keeps encountering errors. Al Rajhi and Al Ahli are much better than it.	M S	##########	عزيزي العميل, يؤسفنا سماع ذلك و نعمل جاهدا على تحسين و تطوير خدماتنا و منتجاتنا. رضاكم هي غايتنا.	##########	0	ar	us		1	ar	bad slow keep encounter errors al rajhi al ahli much good	Negative	1	0	1
Google Play Store	9c2be58e-5042-49e0-b2b9-bf071b94f8a7	The application is very bad and slow, and it is not useful. It causes service disruption and delays.	Hussain A. Almousa	##########	عزيزي العميل، يؤسفنا سماع ذلك و نعمل جاهدين على تحسين و تطوير خدماتنا و منتجاتنا. رضاكم غايتنا	##########	2	ar	us		1	ar	application bad slow useful cause service disruption delay	Negative	1	0	1
Google Play Store	83995f22-70eb-488d-a051-863d7323cc40	I am very exhausted with international transfers. This contract stops me at the SWIFT code and asks me to enter the number again, and they keep rejecting it. Why all this trouble? This bank is bad even with internal transfers. Its whole system has malfunctions and updates.	علي الصمداني (علي الشريف)	##########	عزيزي العميل، لنتمكن من مساعدتك يرجى منكم التواصل مع الدعم الفني من خلال البريد الإلكتروني FransiMobileAdmin@alfransi.com.sa. نسعد بخدمتك	##########	5	ar	us		1	ar	exhaust international transfer contract stop swift code ask enter number keep reject trouble bank bad even internal transfer whole system malfunction update	Negative	1	1	0
Google Play Store	1dc6c8b1-d46b-453e-b238-3212a20d8bbf	The application is very slow and not fast.	BBCمحمد البدري	##########	عزيزي العميل, لنتمكن من مساعدتك يرجى منكم التواصل مع الدعم الفني من خلال البريد الإلكتروني FransiMobileAdmin@alfransi.com.sa تسعدني خدمتك	##########	0	ar	us		3	ar	application slow fast	Negative	0	0	1
Google Play Store	03c96f50-aec5-4db6-bb2e-df2f6c9ee249	The application is not working even after contacting the developer. It worked for two days and then stopped. I would like to know the reason. I do not recommend it at all.	NOOSHY 43	##########	عزيزي العميل, لنتمكن من مساعدتك يرجى منكم التواصل مع الدعم الفني من خلال البريد الإلكتروني FransiMobileAdmin@alfransi.com.sa تسعدني خدمتك	##########	2	ar	us		1	ar	application work even contact developer work two days stop would like know reason recommend	Negative	0	1	0
Google Play Store	010205fb-3ba3-4b9d-8987-f6fa5336d91e	Slow at every stage, it reminds you of the computer as soon as it turns on.	A AZIZ	##########	عزيزي العميل, لنتمكن من مساعدتك يرجى منكم التواصل مع الدعم الفني من خلال البريد الإلكتروني FransiMobileAdmin@alfransi.com.sa تسعدني خدمتك	##########	0	ar	us		1	ar	slow every stage remind computer soon turn	Neutral	1	0	1
Google Play Store	0e862367-b6b4-4990-93e3-2d0689a4b753	After the latest update, if the program remains in this bad state, we will be forced to withdraw our accounts to other banks with better services. We need the program for our daily work. It's not reasonable for me to go to the ATM or bank every time to complete a transaction that is not worth waiting in the crowd.	sarab	##########	عزيزي العميل, يؤسفنا سماع ذلك و نعمل جاهدا على تحسين و تطوير خدماتنا و منتجاتنا. رضاكم هي غايتنا.	##########	0	ar	us		1	ar	late update program remain bad state force withdraw account bank good service need program daily work reasonable go atm bank every time complete transaction worth wait crowd	Negative	1	1	0
Google Play Store	a7d0a0a8-0689-4404-9f50-39460ca8f073	It is supposed to be from best to best, but you guys are from best to worst. I don't know how to transfer or pay, and I don't hesitate. The problem is nice and I won't change the bank. I will withdraw my accounts from you to another bank.	ROK	##########	عزيزي العميل, لنتمكن من مساعدتك يرجى منكم التواصل مع الدعم الفني من خلال البريد الإلكتروني FransiMobileAdmin@alfransi.com.sa تسعدني خدمتك	##########	0	ar	us		1	ar	suppose best best guy best bad dont know transfer pay dont hesitate problem nice wont change bank withdraw account another bank	Negative	1	0	0
Google Play Store	68a6d9a8-8573-4833-98a0-63e4d2b49d93	It was excellent, but after the update, for two days the application doesn't open. It is asking for GPS activation. I don't know what the issue is, my interests in the application are halted because of GPS.	علاء خرصان	##########	عزيزي العميل، لنتمكن من مساعدتك يرجى منكم التواصل مع الدعم الفني من خلال البريد الإلكتروني FransiMobileAdmin@alfransi.com.sa. نسعد بخدمتك	##########	7	ar	us		1	ar	excellent update two days application doesnt open ask gps activation dont know issue interest application halt gps	Negative	0	1	0
Google Play Store	a7369f4f-9d0a-4259-bdf1-d24f6d2f07c2	The application is bad, it freezes on my device. I have deleted it and reinstalled it several times but unfortunately it doesn't open. I wished the application would improve, but it hasn't improved at all.	عبدالله يحيى	##########	عزيزي العميل، لنتمكن من مساعدتك يرجى منكم التواصل مع الدعم الفني من خلال البريد الإلكتروني FransiMobileAdmin@alfransi.com.sa. نسعد بخدمتك	##########	0	ar	us		1	ar	application bad freeze device delete reinstall several time unfortunately doesnt open wish application would improve hasnt improve	Negative	1	1	1
Google Play Store	667ecdf9-8559-419a-a4ad-eeb402cb608a	Like rotten crap after the latest update.	ahmad55455 Mobarki	##########	عزيزي العميل، يؤسفنا سماع ذلك و نعمل جاهدين على تحسين و تطوير خدماتنا و منتجاتنا. رضاكم غايتنا	##########	0	ar	us		1	ar	like rotten crap late update	Negative	1	0	0
Google Play Store	bbbdd1d7-b380-4d38-933d-2dc4e7ab0124	The dirtiest application, we are in Saudi Arabia and security is fully functioning. How can a 3-day application not be accessible despite my accurate submission of all required information? Inshallah, I will transfer my accounts from you to Al-Ahli, Al-Rajhi, or Samba Bank, they are the reliable ones.	عبدالله العمودي (وطني الحبيب٢٠٣٠م)	##########	عزيزي العميل، لنتمكن من مساعدتك يرجى منكم التواصل مع الدعم الفني من خلال البريد الإلكتروني FransiMobileAdmin@alfransi.com.sa. نسعد بخدمتك	##########	0	ar	us		5	ar	dirty application saudi arabia security fully function day application accessible despite accurate submission require information inshallah transfer account alahli alrajhi samba bank reliable ones	Negative	1	1	0
Google Play Store	15f39228-f6f6-4187-ac46-7f3c256a2a9b	"I have a bad application that doesn't work for me."	حمذه عبدالله	##########	عزيزي العميل، لنتمكن من مساعدتك يرجى منكم التواصل مع الدعم الفني من خلال البريد الإلكتروني FransiMobileAdmin@alfransi.com.sa. نسعد بخدمتك	##########	0	ar	us		1	ar	bad application doesnt work	Negative	1	1	0
Google Play Store	fc508d2d-5b2f-4c42-b65d-be1b8a57e76b	What is the problem? The application is stuck and won't open.	أحمد عبدالله	##########	عزيزي العميل, لنتمكن من مساعدتك يرجى التواصل مع الدعم الفني من خلال البريد الإلكتروني FransiMobileAdmin@alfransi.com.sa. نسعد بخدمتك	##########	0	ar	us		1	ar	problem application stick wont open	Negative	0	1	0
Google Play Store	5eabb8f5-dfba-4983-b6ec-c80b3201ab21	The application does not open after the update, it requests to enable GPS, although it is already enabled but not working.	yasser alghamdi	##########	عزيزي العميل, لنتمكن من مساعدتك يرجى التواصل مع الدعم الفني من خلال البريد الإلكتروني FransiMobileAdmin@alfransi.com.sa. نسعد بخدمتك	##########	1	ar	us		1	ar	application open update request enable gps although already enable work	Negative	0	1	0
Google Play Store	a711c666-9116-422b-8bd5-d3817e960172	It is slow on more than one mobile.	سلطان الغامدي	##########	عزيزي العميل, يؤسفنا سماع ذلك ونعمل جاهدين على تحسين وتطوير خدماتنا ومنتجاتنا. رضاكم غايتنا	##########	3	ar	us		1	ar	slow one mobile	Negative	0	0	1
Google Play Store	1941c556-e2c2-48b8-b117-00c86e4a8714	After the latest update, the program does not open. It stays on the application interface page and does not open at all for three days. Please fix this issue as soon as possible.	Ruqaya Al Rabie	##########	عزيزي العميل, لنتمكن من مساعدتك يرجى التواصل مع الدعم الفني من خلال البريد الإلكتروني FransiMobileAdmin@alfransi.com.sa. نسعد بخدمتك	##########	41	ar	us		1	ar	late update program open stay application interface page open three days please fix issue soon possible	Negative	0	1	0
Google Play Store	5c27fce3-c344-495f-8dbb-0f9b00313a50	The application has become very bad. What happened to you?	منال الحناوي	##########	عزيزي العميل, يؤسفنا سماع ذلك ونعمل جاهدين على تحسين وتطوير خدماتنا ومنتجاتنا. رضاكم غايتنا	##########	0	ar	us		1	ar	application become bad happen	Negative	1	0	0
Google Play Store	17bcc398-c96b-4283-8baf-e599c0dd4276	"The application is corrupted and not working. It asks me to enable GPS. What does GPS have to do with it? Find a solution for me with the application."	salam al salam	##########	عزيزي العميل, لنتمكن من مساعدتك يرجى التواصل مع الدعم الفني من خلال البريد الإلكتروني FransiMobileAdmin@alfransi.com.sa. نسعد بخدمتك	##########	0	ar	us		1	ar	application corrupt work ask enable gps gps find solution application	Negative	1	1	0
Google Play Store	6ccaf0e2-233f-4594-b0e5-3d3fa2f06b12	The application is bad, it doesn't work, I can't log in.	salah anees	##########	عزيزي العميل، يؤسفنا سماع ذلك و نعمل جاهدين على تحسين و تطوير خدماتنا و منتجاتنا. رضاكم غايتنا	##########	0	ar	us		1	ar	application bad doesnt work cant log	Negative	1	1	0
Google Play Store	eedda9f7-bfa4-4cdf-974f-c659743d7a26	Peace be upon you, after the recent update, the application is requesting to enable GPS. What's the issue? I am unable to use it. Who else is experiencing the same problem?	خضر المالكي	##########	عزيزي العميل, لنتمكن من مساعدتك يرجى منكم التواصل مع الدعم الفني من خلال البريد الإلكتروني FransiMobileAdmin@alfransi.com.sa تسعدني خدمتك	##########	0	ar	us		1	ar	peace upon recent update application request enable gps whats issue unable use else experience problem	Negative	0	1	0
Google Play Store	526e23b9-2409-4460-bd8f-c63e0f38af5c	The program is very slow.	عبدالله الاحمد	##########	عزيزي العميل، يؤسفنا سماع ذلك و نعمل جاهدين على تحسين و تطوير خدماتنا و منتجاتنا. رضاكم غايتنا	##########	0	ar	us		1	ar	program slow	Negative	0	0	1
Google Play Store	64814b92-4e5a-4e6a-98ae-7ec78e8f9533	The application is slow in responding. It takes a long time for you to settle or transfer.... I kindly request your Excellency to consider using a French mobile application.	T.H H.D	##########	عزيزي العميل, يؤسفنا سماع ذلك و نعمل جاهدا على تحسين و تطوير خدماتنا و منتجاتنا. رضاكم هي غايتنا.	##########	0	ar	us		1	ar	application slow respond take long time settle transfer kindly request excellency consider use french mobile application	Negative	0	1	1
Google Play Store	d675e5ea-cf04-4927-b4dd-9d839bd7dd13	very much,"	امجد البراهيم	##########	عزيزي العميل، يؤسفنا سماع ذلك و نعمل جاهدين على تحسين و تطوير خدماتنا و منتجاتنا. رضاكم غايتنا	##########	0	ar	us		1	ar	much	Neutral	1	0	0
Google Play Store	db67dbdd-0097-4dc7-a560-2c9fc0c64afe	The application is not working.	ABDULAZIZ ALAJALAN	##########	عميلنا العزيز, للتحقق وإفادتك بشكل أفضل يسرنا تواصلك مع الهاتف المصرفي على: 8001242121. شكرا لك	##########	1	ar	us		1	ar	application work	Negative	0	1	0
Google Play Store	ade825b8-122f-45a1-bbbe-8c42f3e93392	The application was good, but yesterday and today it did not open despite repeated attempts, which forced me to delete it and reinstall it again, but without any benefit, and I don't know the reason for that, which leads to the disruption of services and forces you to difficult choices. We hope to solve this issue so that our vital interests do not get disrupted.	Azaz Ali	##########	عزيزي العميل, لنتمكن من مساعدتك يرجى منكم التواصل مع الدعم الفني من خلال البريد الإلكتروني FransiMobileAdmin@alfransi.com.sa تسعدني خدمتك	##########	0	ar	us		2	ar	application good yesterday today open despite repeat attempt force delete reinstall without benefit dont know reason lead disruption service force difficult choices hope solve issue vital interest get disrupt	Negative	1	1	0
Google Play Store	9a75f940-ddd3-4ff6-8ee6-ddaed0dda38b	Very bad experience, extremely slow and complicated, claiming it's for security reasons but it's the worst. The app was great before the recent update, but now it's the worst. It has been over a year and there are negative comments about the app but no solution has been found. I think it's even worse than that, it doesn't deserve a star, shame on you.	Abo Sarah	##########	عزيزي العميل, لنتمكن من مساعدتك يرجى منكم التواصل مع الدعم الفني من خلال البريد الإلكتروني FransiMobileAdmin@alfransi.com.sa تسعدني خدمتك	##########	2	ar	us		1	ar	bad experience extremely slow complicate claim security reason bad app great recent update bad year negative comment app solution find think even bad doesnt deserve star shame	Negative	1	0	1
Google Play Store	2d2f02b9-74ea-4965-968f-0ea4d2d419bd	The application is slow, please update the application.	بندر الرشيدي	##########	عزيزي العميل, لنتمكن من مساعدتك يرجى منكم التواصل مع الدعم الفني من خلال البريد الإلكتروني FransiMobileAdmin@alfransi.com.sa تسعدني خدمتك	##########	0	ar	us		1	ar	application slow please update application	Negative	0	0	1
Google Play Store	af8f2471-8b72-4f6f-9ce7-ef4be11b280e	"The worst banking application in the world, you go finish your work at the branch, I swear it's faster than the application."	ahmad alzahrani	##########	عزيزي العميل, لنتمكن من مساعدتك يرجى منكم التواصل مع الدعم الفني من خلال البريد الإلكتروني FransiMobileAdmin@alfransi.com.sa تسعدني خدمتك	##########	0	ar	us		1	ar	bad bank application world go finish work branch swear fast application	Negative	1	1	0
Google Play Store	375d34cb-8e7a-4fe6-9142-e0f9e3235326	Unfortunately, very dissatisfied.	ساره السيد	2023-08-09 08:41:00	عزيزي العميل، يؤسفنا سماع ذلك و نعمل جاهدين على تحسين و تطوير خدماتنا و منتجاتنا. رضاكم غايتنا	##########	0	ar	us		5	ar	unfortunately dissatisfy	Negative	1	0	0
Google Play Store	9135368c-563f-4a82-a54b-928d7d0c7506	The application is heavy and slow. 👎🏼👎🏼👎🏼	relax	2023-08-09 08:01:00	عزيزي العميل، يؤسفنا سماع ذلك و نعمل جاهدين على تحسين و تطوير خدماتنا و منتجاتنا. رضاكم غايتنا	##########	0	ar	us		1	ar	application heavy slow	Negative	0	0	1
Google Play Store	6ddf5937-ca18-45ec-80d4-8d64b12353b3	The application is very bad after the update. It is not even worth a star. It has many problems and doesn't open for me, even though I entered the correct username and password. Please fix it or revert to the previous old version, as it is a million times better than this one.	محمد حسن	##########	عزيزي العميل، يؤسفنا سماع ذلك و نعمل جاهدين على تحسين و تطوير خدماتنا و منتجاتنا. رضاكم غايتنا	2023-08-08 06:57:00	22	ar	us		1	ar	application bad update even worth star many problems doesnt open even though enter correct username password please fix revert previous old version million time good one	Negative	1	1	0
Google Play Store	5a012437-e300-433d-b24b-82dd38f44711	Unfortunately, the program has a long and very heavy duration, and no transactions can be completed.	Belal Khayat	2023-08-07 08:48:00	عزيزي العميل، يؤسفنا سماع ذلك و نعمل جاهدين على تحسين و تطوير خدماتنا و منتجاتنا. رضاكم غايتنا	2023-08-07 09:52:00	1	ar	us		3	ar	unfortunately program long heavy duration transactions complete	Negative	0	0	1
Google Play Store	1e456e08-c13f-4f6f-8908-acea0c53289e	It is slow, unfortunately cuts off sometimes, and occasionally refuses to transfer between French accounts. I don't know how a bank is unable to improve the French program, it is getting worse.	Mohd Mohd	##########	عزيزي العميل، يؤسفنا سماع ذلك و نعمل جاهدين على تحسين و تطوير خدماتنا و منتجاتنا. رضاكم غايتنا	2023-08-02 05:42:00	0	ar	us		1	ar	slow unfortunately cut sometimes occasionally refuse transfer french account dont know bank unable improve french program get bad	Negative	1	1	1
Google Play Store	b87b2851-bf89-4201-b0e0-e808f006999b	The application is very bad, it does not open at all. Only the application icon fills the screen with nothing for more than 4 days.	زراعتي هوايتي	2023-08-05 09:19:00	عزيزي العميل، لنتمكن من مساعدتك يرجى منكم التواصل مع الدعم الفني من خلال البريد الإلكتروني FransiMobileAdmin@alfransi.com.sa. نسعد بخدمتك	2023-08-06 05:43:00	3	ar	us		1	ar	application bad open application icon fill screen nothing days	Negative	1	1	0
Google Play Store	44fc7944-de66-4892-aab7-9f2628007c8e	Honestly, the application is essential and used more than other websites. Unfortunately, your application has started to freeze and crash, and it is very slow. I hope you can update it. I am considering leaving the bank because of this. It used to be nice before the update. I hope you will take our feedback into consideration, brothers.	hamad altheban	2023-08-05 00:35:00	عزيزي العميل، يؤسفنا سماع ذلك و نعمل جاهدين على تحسين و تطوير خدماتنا و منتجاتنا. رضاكم غايتنا	2023-08-06 05:43:00	0	ar	us		1	ar	honestly application essential use websites unfortunately application start freeze crash slow hope update consider leave bank use nice update hope take feedback consideration brothers	Negative	1	1	1
Google Play Store	82550778-1e3f-4dd4-8486-092ce8538115	The application is very bad, slow, and delayed in response.	فيصل عبدالله	##########	عزيزي العميل، يؤسفنا سماع ذلك و نعمل جاهدين على تحسين و تطوير خدماتنا و منتجاتنا. رضاكم غايتنا	2023-08-06 05:43:00	0	ar	us		1	ar	application bad slow delay response	Negative	1	0	1
Google Play Store	44e725fa-0b74-40f4-9775-75267d44f3d1	The application is very, very slow and extremely sluggish. It has been like this for several months.	ماجد الرويلي	##########	عزيزي العميل، يؤسفنا سماع ذلك و نعمل جاهدين على تحسين و تطوير خدماتنا و منتجاتنا. رضاكم غايتنا	2023-08-06 05:43:00	0	ar	us		1	ar	application slow extremely sluggish like several months	Negative	0	0	1
Google Play Store	a2e807dd-6ed1-4b4e-9ccb-7fab0434a594	Unfortunately, the bank offers many excellent options but is lagging behind in terms of routine. When the 90-day grace period for residence renewal ends, you must go to the bank. My experience is that when my residence expired and I transferred sponsorship, I didn't have my residence card with me. I think the bank knows very well the system of the country it invests in, that it is not my right to…	Ebrahim Gabr	##########			0	ar	us		1	ar	unfortunately bank offer many excellent options lag behind term routine day grace period residence renewal end must go bank experience residence expire transfer sponsorship didnt residence card think bank know well system country invest right issue residence card sponsor one close account money dont know available go	Negative	1	0	0
Google Play Store	beb16115-08dd-4359-9cad-8b167d77496e	The application is slow, and after the latest update, it became very bad. Now, it has been three days and it won't open for me. I hope you fix the issues as soon as possible.	عبده معشي	2023-08-03 07:38:00	عزيزي العميل، يؤسفنا سماع ذلك و نعمل جاهدين على تحسين و تطوير خدماتنا و منتجاتنا. رضاكم غايتنا	2023-08-03 07:56:00	11	ar	us		1	ar	application slow late update become bad three days wont open hope fix issue soon possible	Negative	1	0	1
Google Play Store	0673edd0-e0da-493c-a55b-5f5a9c7200da	Excellent bank and excellent services.	ضياء نعمان الزمر	2023-08-02 01:43:00	عزيزي العميل، نشكركم على ثقتكم بالبنك السعودي الفرنسي ونتطلع دائما لرضا عملائنا.	2023-08-02 05:42:00	0	ar	us		5	ar	excellent bank excellent service	Positive	0	0	0
Google Play Store	31f66ed6-e716-4b18-b00c-726d32bc30f0	Very, very, very bad.. I submitted a complaint so that someone would contact me about the application, but no one called!!	Doaa hassan	2023-08-01 06:49:00	عزيزي العميل، لنتمكن من مساعدتك يرجى منكم التواصل مع الدعم الفني من خلال البريد الإلكتروني FransiMobileAdmin@alfransi.com.sa. نسعد بخدمتك	##########	5	ar	us		1	ar	bad submit complaint someone would contact application one call	Negative	1	1	0
Google Play Store	4eb10b8b-59f3-47e2-8ab3-571c07ee9377	The application is not working on mobile devices associated with the first recognized device.	issa-alajam essa	##########	عزيزي العميل، لنتمكن من مساعدتك يرجى منكم التواصل مع الدعم الفني من خلال البريد الإلكتروني FransiMobileAdmin@alfransi.com.sa. نسعد بخدمتك	##########	1	ar	us		1	ar	application work mobile devices associate first recognize device	Negative	0	1	0
Google Play Store	edabb4e8-c813-4e5f-a7bf-e50c5cd97686	The worst banking application.	Hamody Mustafa	##########	عزيزي العميل، يؤسفنا سماع ذلك و نعمل جاهدين على تحسين و تطوير خدماتنا و منتجاتنا. رضاكم غايتنا	##########	0	ar	us		1	ar	bad bank application	Negative	1	0	0
Google Play Store	ec7c8a3b-6ad5-49d6-a19b-094e23b116b5	Good, I hope that the employees will improve the application because the transition between elements within the application is very, very slow. Generally, the application does not compete with other banks. Please pay attention.	ابوطالب العواجي	##########	عزيزي العميل، يؤسفنا سماع ذلك و نعمل جاهدين على تحسين و تطوير خدماتنا و منتجاتنا. رضاكم غايتنا	##########	1	ar	us		3	ar	good hope employees improve application transition elements within application slow generally application compete bank please pay attention	Negative	1	0	1
Google Play Store	d5c731e0-9a9f-4dc5-ac74-b273180d54ec	The application is slow and annoying, and today I tried to make a transfer and it took a very long time, and I don't know the reason.	Khalid Albasher	##########	عزيزي العميل, يؤسفنا سماع ذلك ونعمل جاهدين على تحسين وتطوير خدماتنا ومنتجاتنا. رضاكم غايتنا	##########	7	ar	us		1	ar	application slow annoy today try make transfer take long time dont know reason	Negative	1	0	1
Google Play Store	50c0b0ba-1f19-48fc-8c09-b42e983ffe5b	The application is very slow and its services are never complete. It needs improvement.	حمد محمد	##########	عزيزي العميل, يؤسفنا سماع ذلك ونعمل جاهدين على تحسين وتطوير خدماتنا ومنتجاتنا. رضاكم غايتنا	##########	1	ar	us		1	ar	application slow service never complete need improvement	Negative	0	0	1
Google Play Store	8f21a9b1-41ba-431e-b27e-3da902a3a39c	This bank is very bad, I warn you about it, I swear to God, I haven't seen anything worse and more despicable than this bank. They manipulate the financing contract in a vague and dangerous manner, as if they are a gang, and the central bank is asleep.	ابو نايف المالكي	##########			0	ar	us		1	ar	bank bad warn swear god havent see anything bad despicable bank manipulate finance contract vague dangerous manner gang central bank asleep	Negative	1	0	0
Google Play Store	94aedbdd-d238-4f08-9565-5e3243a6d5fd	The application is bad, slow, and not developed as it should be.	فارس بلا جواد	##########	عزيزي العميل، يؤسفنا سماع ذلك و نعمل جاهدين على تحسين و تطوير خدماتنا و منتجاتنا. رضاكم غايتنا	##########	4	ar	us		1	ar	application bad slow develop	Negative	1	0	1
Google Play Store	50ce758f-308f-468a-9b65-bd2af9d26813	The worst banking application... It has no advancements whatsoever... Due to the poor application, the account was changed and the balance was transferred to another bank.	غسان بخاري	##########	عزيزي العميل، يؤسفنا سماع ذلك و نعمل جاهدين على تحسين و تطوير خدماتنا و منتجاتنا. رضاكم غايتنا	##########	4	ar	us		1	ar	bad bank application advancements whatsoever due poor application account change balance transfer another bank	Negative	1	0	0
Google Play Store	440ba3b2-824a-4850-9183-1a8a5513dc77	Very bad, very heavy, and with knowledge at first it was not like this. I hope you solve the heaviness in the application.	ابوفيصل ال مفلح	##########	عزيزي العميل، يؤسفنا سماع ذلك و نعمل جاهدين على تحسين و تطوير خدماتنا و منتجاتنا. رضاكم غايتنا	##########	3	ar	us		1	ar	bad heavy knowledge first like hope solve heaviness application	Negative	1	0	1
Google Play Store	c02392d6-6533-4d2b-bb18-93a52bf97941	Very, very slow application.	homsy al7r	##########	عزيزي العميل، يؤسفنا سماع ذلك و نعمل جاهدين على تحسين و تطوير خدماتنا و منتجاتنا. رضاكم غايتنا	##########	3	ar	us		1	ar	slow application	Negative	0	0	1
Google Play Store	83aa6ee4-441e-4f5a-b1bb-19eb5ca055e5	A very, very bad application. It is a slow website that takes a portion of your time. It frequently kicks you out of the application for security reasons, and you need another phone to receive messages and make calls. If you open their phone service, it kicks you out of the application and you cannot perform your task except with another phone. It is a backward website. I advise against dealing w…	Ali Alamer	##########	عزيزي العميل، يؤسفنا سماع ذلك و نعمل جاهدين على تحسين و تطوير خدماتنا و منتجاتنا. رضاكم غايتنا	##########	7	ar	us		1	ar	bad application slow website take portion time frequently kick application security reason need another phone receive message make call open phone service kick application perform task except another phone backward website advise deal sterile complicate bank unless one force like advise deal go al rajhi bank excellent smooth easy secure	Negative	1	1	1
Google Play Store	71b8e4ae-bae2-4dcc-ba8b-9a5200f858f0	An application deserving of 5 stars.	فُـ,ـؤآڊ الراشد	##########	عزيزي العميل، نشكركم على ثقتكم بالبنك السعودي الفرنسي ونتطلع دائما لرضا عملائنا.	##########	0	ar	us		5	ar	application deserve star	Positive	1	0	0
Google Play Store	9aefc88a-042d-491a-a629-e1fb85397b42	The application is very slow and freezes a lot.	Moody Alslemy	##########	عزيزي العميل، يؤسفنا سماع ذلك و نعمل جاهدين على تحسين و تطوير خدماتنا و منتجاتنا. رضاكم غايتنا	##########	0	ar	us		1	ar	application slow freeze lot	Negative	1	0	1
Google Play Store	a2859311-243e-47db-b48a-ca94038be4f7	The application has been frozen for three days and it's not opening.	يحي قيسي	##########	عزيزي العميل, لنتمكن من مساعدتك يرجى منكم التواصل مع الدعم الفني من خلال البريد الإلكتروني FransiMobileAdmin@alfransi.com.sa تسعدني خدمتك	2023-07-02 05:59:00	0	ar	us		1	ar	application freeze three days open	Negative	0	1	1
Google Play Store	49e746e1-8a6b-4cab-a07c-2dad5f160fc6	I trust Saudi French Bank, despite the poor performance of its primitive application, but I trust a better application than this or a comprehensive update to the application.	Abdulaziz Saleh	##########	عزيزي العميل، يؤسفنا سماع ذلك و نعمل جاهدين على تحسين و تطوير خدماتنا و منتجاتنا. رضاكم غايتنا	##########	67	ar	us		1	ar	trust saudi french bank despite poor performance primitive application trust good application comprehensive update application	Neutral	1	0	0
Google Play Store	10842c05-1d53-4a36-8b49-a8e272e0a04a	The application is slow, not like before.	علي الشيخ	##########	عزيزي العميل, يؤسفنا سماع ذلك و نعمل جاهدا على تحسين و تطوير خدماتنا و منتجاتنا. رضاكم هي غايتنا.	2023-07-04 06:14:00	0	ar	us		2	ar	application slow like	Negative	0	0	1
Google Play Store	7e932917-46dd-4d79-ac80-a991c4c134c3	For approximately two weeks, I have been trying to open the application but it doesn't open for me. And each update was worse than the previous one.	zakria saihati	##########	عزيزي العميل, يؤسفنا سماع ذلك و نعمل جاهدا على تحسين و تطوير خدماتنا و منتجاتنا. رضاكم هي غايتنا.	##########	6	ar	us		1	ar	approximately two weeks try open application doesnt open update bad previous one	Negative	1	1	0
Google Play Store	6f18d231-67b5-4141-932a-ed2fb1092499	There is a technical problem with the application, and it is not working. It would be great if it could be updated.	Majed Adel	2023-07-03 09:49:00	عزيزي العميل, لنتمكن من مساعدتك يرجى منكم التواصل مع الدعم الفني من خلال البريد الإلكتروني FransiMobileAdmin@alfransi.com.sa تسعدني خدمتك	2023-07-04 06:13:00	4	ar	us		1	ar	technical problem application work would great could update	Negative	0	1	0
Google Play Store	6fe0d243-f718-4d9a-ab2b-ca9601ae524c	It used to be one of the best banks, but now, after the electronic transformation of banking transactions, it has become the worst because of this application. The saying "the last straw that broke the camel's back" applies to them... The application went from bad to worse.	Bader Alhakeem	2023-07-03 00:41:00	عزيزي العميل, يؤسفنا سماع ذلك و نعمل جاهدين على تحسين و تطوير خدماتنا و منتجاتنا. رضاكم هي غايتنا	2023-07-03 00:45:00	1	ar	us		1	ar	use one best bank electronic transformation bank transactions become bad application say last straw break camels back apply application go bad bad	Negative	1	0	0
Google Play Store	e3872d9c-662d-42e1-a62a-52b27330530d	My account has been frozen in order to update my information, and every time I enter my data for the update, it takes me back and clears the fields. You are the worst bank in terms of efficiency, freezing your customers' accounts and turning them into a non-functioning technical glitch! May God curse you and the hour I dealt with you.	سليمان الموسى	##########	عزيزي العميل، لنتمكن من مساعدتك يرجى منكم التواصل مع الدعم الفني من خلال البريد الإلكتروني FransiMobileAdmin@alfransi.com.sa. نسعد بخدمتك	##########	3	ar	us		1	ar	account freeze order update information every time enter data update take back clear field bad bank term efficiency freeze customers account turn nonfunctioning technical glitch may god curse hour deal	Negative	1	1	1
Google Play Store	50aed5c6-b403-44d3-8bce-7bc2b27a626c	Very bad application. I don't think all customers will be satisfied with it if it continues like this.	khalid 1	##########	عزيزي العميل, يؤسفنا سماع ذلك و نعمل جاهدين على تحسين و تطوير خدماتنا و منتجاتنا. رضاكم هي غايتنا	##########	7	ar	us		1	ar	bad application dont think customers satisfy continue like	Negative	1	0	0
Google Play Store	b067f040-a7e5-4635-8f37-9b786f350d4f	"The application has become trash after being one of the best applications in global banking that kept up with development, and now you are going backward. You don't feel the user's suffering. May God not bless your work as long as you are falling short."	3ashq Alaith	2023-07-02 01:28:00	عزيزي العميل, يؤسفنا سماع ذلك و نعمل جاهدا على تحسين و تطوير خدماتنا و منتجاتنا. رضاكم هي غايتنا.	2023-07-02 05:59:00	0	ar	us		1	ar	application become trash one best applications global bank keep development go backward dont feel users suffer may god bless work long fall short	Negative	1	0	0
Google Play Store	6cc2c643-789b-494a-a0c6-eeea87ca1d39	The application is frozen and it is not opening.	Ayman Alhamdi	##########	عزيزي العميل، لنتمكن من مساعدتك يرجى منكم التواصل مع الدعم الفني من خلال البريد الإلكتروني FransiMobileAdmin@alfransi.com.sa. نسعد بخدمتك	##########	1	ar	us		1	ar	application freeze open	Negative	0	1	1
Google Play Store	c21b6b31-196d-4ab5-bc02-83ba0b9bbaa2	Very slow	مشعل الصليح	2023-07-01 05:04:00	عزيزي العميل, يؤسفنا سماع ذلك و نعمل جاهدا على تحسين و تطوير خدماتنا و منتجاتنا. رضاكم هي غايتنا.	##########	0	ar	us		1	ar	slow	Negative	0	0	1
Google Play Store	bf08624a-575b-4670-8cb9-56eeedd80f2c	Currently he/she is always hanging.	محمد منشي	##########	عزيزي العميل, يؤسفنا سماع ذلك و نعمل جاهدا على تحسين و تطوير خدماتنا و منتجاتنا. رضاكم هي غايتنا.	##########	0	ar	us		3	ar	currently heshe always hang	Neutral	0	0	1
Google Play Store	3a4fd323-c3f9-4e13-a091-2928889dc1b0	The application is slow to respond, and its services are limited and incomplete. When making a credit card payment, you receive a message of transaction failure, despite the amount being deducted in full!! This confuses the customer. Also, Western Union transfers do not arrive quickly. It has been 24 hours and the transfer has not been completed yet 😡!	Mohammad Yamani ابوزياد	##########	عزيزي العميل, يؤسفنا سماع ذلك و نعمل جاهدا على تحسين و تطوير خدماتنا و منتجاتنا. رضاكم هي غايتنا.	##########	38	ar	us		1	ar	application slow respond service limit incomplete make credit card payment receive message transaction failure despite amount deduct full confuse customer also western union transfer arrive quickly hours transfer complete yet	Negative	1	1	1
Google Play Store	a50dd367-ad59-44c5-b648-e10742cc3a31	The worst bank, the worst application, and the worst Arabic transaction, ugh!	Hasan Almaiuf	##########			0	ar	us		1	ar	bad bank bad application bad arabic transaction ugh	Negative	1	0	0
Google Play Store	f43c0457-bb5e-436f-821a-84d7f8da399d	Very busy and always stressed.	محمد العطاس	##########	عزيزي العميل، يؤسفنا سماع ذلك و نعمل جاهدين على تحسين و تطوير خدماتنا و منتجاتنا. رضاكم غايتنا	##########	2	ar	us		1	ar	busy always stress	Negative	0	0	1
Google Play Store	3b580347-1c82-48e7-9f06-99e9670c9eb3	A the worst application, unfortunately.	نواف العطيات	##########	عزيزي العميل، يؤسفنا سماع ذلك و نعمل جاهدين على تحسين و تطوير خدماتنا و منتجاتنا. رضاكم غايتنا	##########	0	ar	us		1	ar	bad application unfortunately	Negative	1	0	0
Google Play Store	10eb26f9-04c9-43e4-a8b6-076dca5a40db	The worst banking application, extremely slow to the point of frustration and in the end, if you try to execute a transaction, it tells you "apologies, technical error." Terrible!	BA_ND_AR 98	##########	عزيزي العميل، لنتمكن من مساعدتك يرجى منكم التواصل مع الدعم الفني من خلال البريد الإلكتروني FransiMobileAdmin@alfransi.com.sa. نسعد بخدمتك	##########	0	ar	us		1	ar	bad bank application extremely slow point frustration end try execute transaction tell apologies technical error terrible	Negative	1	0	1
Google Play Store	3a8da77e-758e-4ec4-9c0e-8512ca4a6bf7	How can the language be translated from English to Arabic?	samy h16	##########	عزيزي العميل، بعد فتح التطبيق يرجى اختيار حرف (ع) في أعلى الشاشة.	##########	1	ar	us		1	ar	language translate english arabic	Neutral	0	1	0
Google Play Store	a6316648-f206-4c60-acc2-4f690407076e	The application has been not opening for a while.	mam k	##########	عزيزي العميل، لنتمكن من مساعدتك يرجى منكم التواصل مع الدعم الفني من خلال البريد الإلكتروني FransiMobileAdmin@alfransi.com.sa. نسعد بخدمتك	##########	0	ar	us		1	ar	application open	Negative	0	1	0
Google Play Store	eb97df81-6821-4cdf-bc56-7f56ac68ea74	The application doesn't open, one feels the burden of the world on their shoulders, and it hasn't opened for me for two days.	Abdellatif. ahmed	##########	عزيزي العميل، يؤسفنا سماع ذلك و نعمل جاهدين على تحسين و تطوير خدماتنا و منتجاتنا. رضاكم غايتنا	##########	0	ar	us		1	ar	application doesnt open one feel burden world shoulder hasnt open two days	Negative	1	1	0
Google Play Store	864fc62a-5633-45f7-b0b1-993d20cf8ced	"Very bad application, whenever I transfer or pay, I have to delete the application and download it again."	حصه علي	##########	عزيزي العميل، يؤسفنا سماع ذلك و نعمل جاهدين على تحسين و تطوير خدماتنا و منتجاتنا. رضاكم غايتنا	##########	6	ar	us		1	ar	bad application whenever transfer pay delete application download	Negative	1	1	0
Google Play Store	3cfd1423-35e2-4183-98b9-4971637f4c49	The application is not working properly.	قاسم محمد	##########	عزيزي العميل، يؤسفنا سماع ذلك و نعمل جاهدين على تحسين و تطوير خدماتنا و منتجاتنا. رضاكم غايتنا	##########	0	ar	us		1	ar	application work properly	Negative	0	1	0
Google Play Store	cf596734-05c0-4726-9b43-1d5070a6b46d	The application has become very slow and doesn't open easily, and it takes time between each step. Before that, it was excellent. I don't know why this issue hasn't been resolved.	Ismail Osman	##########	عزيزي العميل، يؤسفنا سماع ذلك و نعمل جاهدين على تحسين و تطوير خدماتنا و منتجاتنا. رضاكم غايتنا	##########	10	ar	us		1	ar	application become slow doesnt open easily take time step excellent dont know issue hasnt resolve	Negative	1	1	1
Google Play Store	1b67ccf1-fc58-4ca8-b8e9-e2c5ee7d5414	The application is not opening, why?	ahmad shalhoob	##########	عزيزي العميل، لنتمكن من مساعدتك يرجى منكم التواصل مع الدعم الفني من خلال البريد الإلكتروني FransiMobileAdmin@alfransi.com.sa. نسعد بخدمتك	##########	0	ar	us		2	ar	application open	Negative	0	1	0
Google Play Store	63af3ba9-1bed-4a27-81db-384514f0cf28	A very bad application that records login without sending the password and records the logout of the other bank. Their application is very easy and does not freeze.	ali ali	##########	عزيزي العميل، يؤسفنا سماع ذلك و نعمل جاهدين على تحسين و تطوير خدماتنا و منتجاتنا. رضاكم غايتنا	##########	11	ar	us		1	ar	bad application record login without send password record logout bank application easy freeze	Negative	1	0	1
Google Play Store	fb3711e4-1c41-4318-b3b0-ada903f89845	The application is not suitable for the bank, every update I make is worse than the previous one. God is the only one who can help.	Naif Ali	##########	عزيزي العميل, يؤسفنا سماع ذلك و نعمل جاهدا على تحسين و تطوير خدماتنا و منتجاتنا. رضاكم هي غايتنا.	##########	0	ar	us		1	ar	application suitable bank every update make bad previous one god one help	Negative	1	0	0
Google Play Store	c8f57777-ee2b-48e7-a0e1-27cf7456290d	The application is very slow and has been extremely slow since the last update. It hasn't opened for me so far.	محمد حسن	##########	عزيزي العميل، لنتمكن من مساعدتك يرجى منكم التواصل مع الدعم الفني من خلال البريد الإلكتروني FransiMobileAdmin@alfransi.com.sa. نسعد بخدمتك	##########	1	ar	us		1	ar	application slow extremely slow since last update hasnt open far	Negative	0	1	1
Google Play Store	919be76d-40d5-4328-a242-2cf95b0e1528	Honestly, it's very bad, unfortunately 😞	يوسف علي مدربا	##########	عزيزي العميل، يؤسفنا سماع ذلك و نعمل جاهدين على تحسين و تطوير خدماتنا و منتجاتنا. رضاكم غايتنا	##########	0	ar	us		1	ar	honestly bad unfortunately	Negative	1	0	0
Google Play Store	b55913a2-0571-47fa-93f0-1642dbe3a85d	I don't understand the phrase "أن زراكردك ض". It could be a typo or an incomplete sentence. Please provide more context or check for any errors.	Mohamed Mahmoud	##########			0	ar	us		3	ar	dont understand phrase could typo incomplete sentence please provide context check errors	Negative	1	1	0
Google Play Store	9f54b70d-c92e-47cb-9797-108211a4ff96	Heavy and annoying.	Hamoody Alshehri	##########	عزيزي العميل، يؤسفنا سماع ذلك و نعمل جاهدين على تحسين و تطوير خدماتنا و منتجاتنا. رضاكم غايتنا	##########	0	ar	us		1	ar	heavy annoy	Negative	0	0	1
Google Play Store	39974b5c-5c48-4b4d-bc89-a2bfd7fda86c	The most despicable and rotten application that belongs in the trash of history. If it was possible to give it less than one star, I would have.	asim aljeffrey	##########	عزيزي العميل، يؤسفنا سماع ذلك و نعمل جاهدين على تحسين و تطوير خدماتنا و منتجاتنا. رضاكم غايتنا	##########	5	ar	us		1	ar	despicable rotten application belong trash history possible give less one star would	Negative	1	0	0
Google Play Store	bd263663-26bf-409a-868f-7cc5e0b40716	Worst application. It never responds with the password. I even decided to cancel my account with Saudi French Bank.	jehad nammora	##########	عزيزي العميل، لنتمكن من مساعدتك يرجى منكم التواصل مع الدعم الفني من خلال البريد الإلكتروني FransiMobileAdmin@alfransi.com.sa. نسعد بخدمتك	##########	0	ar	us		1	ar	bad application never respond password even decide cancel account saudi french bank	Negative	1	1	0
Google Play Store	a4ffadfc-81e9-48b8-b88d-4d73da19cf61	Bad application and veryyyyyyy slow.	Khalid Eltayeb	##########	عزيزي العميل، يؤسفنا سماع ذلك و نعمل جاهدين على تحسين و تطوير خدماتنا و منتجاتنا. رضاكم غايتنا	##########	2	ar	us		1	ar	bad application veryyyyyyy slow	Negative	1	0	1
Google Play Store	99590ee8-9a58-44e2-81d7-987c7d518d89	Trash application	Tema Temo	##########	عزيزي العميل, يؤسفنا سماع ذلك و نعمل جاهدا على تحسين و تطوير خدماتنا و منتجاتنا. رضاكم هي غايتنا.	##########	0	ar	us		1	ar	trash application	Negative	1	0	0
Google Play Store	6263225f-3e7f-4595-bb32-0bb15db9bae1	I made the hardest password but it didn't work for me. I hope the French bank develops this application for its ease of use. Your service is excellent and thank you.	Ali Alzain	##########	عزيزي العميل, نشكركم على ثقتكم بالبنك السعودي الفرنسي و نتطلع دائما لرضا عملائنا	##########	0	ar	us		1	ar	make hard password didnt work hope french bank develop application ease use service excellent thank	Positive	1	1	0
Google Play Store	9c93b2bc-3564-49e4-97e0-9eb1e7b975f2	Very special services. Thank you.	أحمد الشهري	2023-06-04 08:55:00	عزيزي العميل, نشكركم على ثقتكم بالبنك السعودي الفرنسي و نتطلع دائما لرضا عملائنا	##########	0	ar	us		5	ar	special service thank	Positive	0	0	0
Google Play Store	23fb6ed4-c8f9-4ff2-81c5-8db5b2828779	Very slow	Fadhel Alkhalifah	##########	عزيزي العميل، يؤسفنا سماع ذلك و نعمل جاهدين على تحسين و تطوير خدماتنا و منتجاتنا. رضاكم غايتنا	##########	0	ar	us		1	ar	slow	Negative	0	0	1
Google Play Store	401447e6-ec22-47e6-ac4c-a2cf3ee1731b	"I have become the worst banking application. I transferred my entire salary to another bank because of this the worst application."	G20 S	##########	عزيزي العميل، يؤسفنا سماع ذلك و نعمل جاهدين على تحسين و تطوير خدماتنا و منتجاتنا. رضاكم غايتنا	##########	0	ar	us		1	ar	become bad bank application transfer entire salary another bank bad application	Negative	1	0	0
Google Play Store	7038d408-12ed-47c8-bc0b-28d2f52e8fe9	Very slow to the point of being terrible, heavy on the device, and other mentioned negative qualities in the comments. Thank you.	alseele1 alseele1	##########	عزيزي العميل، يؤسفنا سماع ذلك و نعمل جاهدين على تحسين و تطوير خدماتنا و منتجاتنا. رضاكم غايتنا	##########	0	ar	us		1	ar	slow point terrible heavy device mention negative qualities comment thank	Negative	1	0	1
Google Play Store	45f529fa-63c4-4b90-b883-03b5da0d8a48	The worst customer service you can call (complaints and suggestions) with a waiting time of 15 minutes and no response.	Mohemmed Adlan	##########	عزيزي العميل، يمكنك إرسال كامل تفاصيل الشكوى مع بيانات التواصل ورقم الهوية عبر البريد الإلكتروني: ccc@alfransi.com.sa وسيتم تسجيل شكوى رسمية واستلام رقمها برسالة نصية خلال ساعات العمل الرسمية. شكرا لتواصلك	##########	0	ar	us		1	ar	bad customer service call complaints suggestions wait time minutes response	Negative	1	0	0
Google Play Store	720dc8ed-eb50-4c0b-8f19-11e67099ea71	The application is very very slow. Please solve the problem. It is slow during login and does not accept money transfers. Please solve the problem as soon as possible.	Oo Iii	##########	عزيزي العميل، يؤسفنا سماع ذلك و نعمل جاهدين على تحسين و تطوير خدماتنا و منتجاتنا. رضاكم غايتنا	##########	0	ar	us		3	ar	application slow please solve problem slow login accept money transfer please solve problem soon possible	Negative	0	0	1
Google Play Store	cfe183b0-c298-4771-a21f-75b8289f4168	Very slow and stumbling in my financial transfers. I have been waiting for 3 days now for the issue to be resolved. Thank you.	amani baakdah	##########	عزيزي العميل، يؤسفنا سماع ذلك و نعمل جاهدين على تحسين و تطوير خدماتنا و منتجاتنا. رضاكم غايتنا	##########	0	ar	us		1	ar	slow stumble financial transfer wait days issue resolve thank	Negative	1	0	1
Google Play Store	ae8e104f-38b8-49e3-81dc-88b80baa168e	The program from nice Al-H Update did not open for me. Every time I try, an error message appears.	ابو محمد الدرازي	##########	عزيزي العميل، لنتمكن من مساعدتك يرجى منكم التواصل مع الدعم الفني من خلال البريد الإلكتروني FransiMobileAdmin@alfransi.com.sa. نسعد بخدمتك	##########	0	ar	us		1	ar	program nice alh update open every time try error message appear	Negative	0	1	0
Google Play Store	0941e87c-e673-439a-88bf-a0e7ed34c8bd	This program is sterile and slow, and every time it says sorry, the service can't be used now. When can I use it then? I mean, I open the application and still need to use it. Can someone understand it, please, guys?	ahmed elshal	##########	عزيزي العميل، لنتمكن من مساعدتك يرجى منكم التواصل مع الدعم الفني من خلال البريد الإلكتروني FransiMobileAdmin@alfransi.com.sa. نسعد بخدمتك	##########	1	ar	us		1	ar	program sterile slow every time say sorry service cant use use mean open application still need use someone understand please guy	Negative	1	1	1
Google Play Store	996180d0-95a8-4eec-96f2-bd6c9220a440	The application is heavy and doesn't open my account every day. I get a message about trusted devices even though I'm opening it from my usual device. In addition to being very slow, the application used to be excellent before.	مـ	##########	عزيزي العميل, يؤسفنا سماع ذلك و نعمل جاهدا على تحسين و تطوير خدماتنا و منتجاتنا. رضاكم هي غايتنا.	##########	5	ar	us		1	ar	application heavy doesnt open account every day get message trust devices even though im open usual device addition slow application use excellent	Negative	0	0	1
Google Play Store	a782df84-f00f-4088-960d-5c18c75b5cc9	Very bad application	بندر طميحي	##########	عزيزي العميل، يؤسفنا سماع ذلك و نعمل جاهدين على تحسين و تطوير خدماتنا و منتجاتنا. رضاكم غايتنا	##########	0	ar	us		1	ar	bad application	Negative	1	0	0
Google Play Store	210f1a37-0468-4c01-8b01-542527448c1f	The previous program was excellent and fast. Now, it is very slow in terms of logging in and switching between services. I hope it gets fixed.	anwar alshwmi	##########	عزيزي العميل, نشكر لكم تواصلكم و سيتم رفع إقتراحاتكم للادارات المعنية . رضاكم غايتنا	##########	2	ar	us		2	ar	previous program excellent fast slow term log switch service hope get fix	Negative	1	0	1
Google Play Store	3f538b09-bbd4-4f07-83cf-ddacf54119de	An application hates you in the bank, in money, and in everything.	azaz 111	##########	عزيزي العميل، يؤسفنا سماع ذلك و نعمل جاهدين على تحسين و تطوير خدماتنا و منتجاتنا. رضاكم غايتنا	##########	0	ar	us		1	ar	application hat bank money everything	Negative	1	0	0
Google Play Store	c0c253fe-5ba1-415a-94f5-7d468345d72c	Very, very bad application. With the advancement of technology, your application is very late and the services are poor.	رايد قاسم	##########	عزيزي العميل، يؤسفنا سماع ذلك و نعمل جاهدين على تحسين و تطوير خدماتنا و منتجاتنا. رضاكم غايتنا	##########	5	ar	us		1	ar	bad application advancement technology application late service poor	Negative	1	0	0
Google Play Store	5870127f-4b94-4196-aa80-d8debd14e28e	The worst application.	Abdullah Alruwaite	##########	عزيزي العميل، يؤسفنا سماع ذلك و نعمل جاهدين على تحسين و تطوير خدماتنا و منتجاتنا. رضاكم غايتنا	##########	0	ar	us		1	ar	bad application	Negative	1	0	0
Google Play Store	ef18da5a-312e-49eb-a92c-80b1171f2fc0	Batay application can help solve the problem.	علي علي	##########	عزيزي العميل, يؤسفنا سماع ذلك و نعمل جاهدا على تحسين و تطوير خدماتنا و منتجاتنا. رضاكم هي غايتنا.	##########	0	ar	us		1	ar	batay application help solve problem	Neutral	0	1	0
Google Play Store	4ab8d974-edfa-42cb-9fa2-be626eb96a1f	The latest update is very bad, it has many errors and problems... It is not possible to pay bills with an amount lower than the required, as in other banks... When logging in, it asks to verify the device, claiming that it is not registered, even though I have installed the application on only one device... It is very slow and the response is zero, it keeps saying there is no internet connection.…	أحمد محمد	##########	عزيزي العميل, يؤسفنا سماع ذلك و نعمل جاهدا على تحسين و تطوير خدماتنا و منتجاتنا. رضاكم هي غايتنا.	##########	27	ar	us		1	ar	late update bad many errors problems possible pay bill amount low require bank log ask verify device claim register even though instal application one device slow response zero keep say internet connection basic errors bank application please resolve soon possible	Negative	1	1	0
Google Play Store	960c38be-1838-4790-8f82-c4f548220450	Still bad.	Bassem Alessi	##########	عزيزي العميل, يؤسفنا سماع ذلك و نعمل جاهدا على تحسين و تطوير خدماتنا و منتجاتنا. رضاكم هي غايتنا.	##########	0	ar	us		2	ar	still bad	Negative	1	0	0
Google Play Store	1f4a6beb-3e91-4d22-b6ee-38806ca2bea1	It was good and then it became very very slow.	مستخدم Google	##########	عزيزي العميل, يؤسفنا سماع ذلك و نعمل جاهدا على تحسين و تطوير خدماتنا و منتجاتنا. رضاكم هي غايتنا.	##########	0	ar	us		1	ar	good become slow	Negative	1	0	1
Google Play Store	e062523d-dec6-4fea-aab1-5b7263257ed8	The worst application and the slowest application on earth, I hate my phone because of it.	ابو الخطاب المغربي	##########	عزيزي العميل, يؤسفنا سماع ذلك و نعمل جاهدا على تحسين و تطوير خدماتنا و منتجاتنا. رضاكم هي غايتنا.	##########	0	ar	us		1	ar	bad application slow application earth hate phone	Negative	1	0	1
Google Play Store	50498310-5825-46ff-a977-ea94493f4648	The application is very, very slow. I hope it gets developed.	Hassan Ali	2023-05-02 07:07:00	عزيزي العميل, يؤسفنا سماع ذلك و نعمل جاهدين على تحسين و تطوير خدماتنا و منتجاتنا. رضاكم هي غايتنا.	##########	0	ar	us		1	ar	application slow hope get develop	Negative	1	0	1
Google Play Store	8769035e-674e-4cfd-a293-9e928eccd2f5	The application is very, very bad. There has been no improvement or development on it despite the numerous updates you have worked on. The second banks are better than you in improving their application and faster in usage and opening the application. Your application is very bad and very slow.	عبدالله جاسم	2023-05-01 02:26:00	عزيزي العميل, يؤسفنا سماع ذلك و نعمل جاهدا على تحسين و تطوير خدماتنا و منتجاتنا. رضاكم هي غايتنا.	##########	9	ar	us		1	ar	application bad improvement development despite numerous update work second bank good improve application fast usage open application application bad slow	Negative	1	0	1
Google Play Store	7e949910-e50e-4f4f-9055-615cc472022e	Very, very bad. It crashes and sometimes the application doesn't work.	abu azam عبدالمحسن	##########	عزيزي العميل، يؤسفنا سماع ذلك و نعمل جاهدين على تحسين و تطوير خدماتنا و منتجاتنا. رضاكم غايتنا	##########	1	ar	us		1	ar	bad crash sometimes application doesnt work	Negative	1	1	1
Google Play Store	d05605ef-b305-4449-b86b-e228daf89a87	The application is terrible and does not match the level of a prestigious bank. It is heavy and the app doesn't open for me even after numerous attempts. It has not received an update in a long time, which is embarrassing and shows the worst on the part of the bank. There are small and simple stores that create amazing applications in terms of performance and quality. It is shameful and God knows…	Areej RAWAS	##########	عزيزي العميل، يؤسفنا سماع ذلك و نعمل جاهدين على تحسين و تطوير خدماتنا و منتجاتنا. رضاكم غايتنا	##########	0	ar	us		1	ar	application terrible match level prestigious bank heavy app doesnt open even numerous attempt receive update long time embarrass show bad part bank small simple store create amaze applications term performance quality shameful god know bank unable fix application suit reputation	Negative	1	1	0
Google Play Store	46006bdb-10e7-4cf9-bea9-b96dcee78857	He has been so slow, so slow, and he has been the worst for several months. He raises my blood pressure and doesn't even pay the shipping bills properly. Your application is useless, please fix it.	SULTAN S	##########	عزيزي العميل، يؤسفنا سماع ذلك و نعمل جاهدين على تحسين و تطوير خدماتنا و منتجاتنا. رضاكم غايتنا	##########	0	ar	us		1	ar	slow slow bad several months raise blood pressure doesnt even pay ship bill properly application useless please fix	Negative	1	0	1
Google Play Store	91ef7b1a-e9d5-4282-881f-883c246e323c	"The worst and most disappointing bank application on the face of the earth. It is slow and heavy, making you hate using the application. Learn from other bank applications that have a better performance. Improve your services, this is the least you can offer to your customers."	Mσн	##########	عزيزي العميل، يؤسفنا سماع ذلك و نعمل جاهدين على تحسين و تطوير خدماتنا و منتجاتنا. رضاكم غايتنا	##########	5	ar	us		1	ar	bad disappoint bank application face earth slow heavy make hate use application learn bank applications good performance improve service least offer customers	Negative	1	0	1
Google Play Store	7dfac367-0a3c-4674-9b46-7946ec5416a0	The application was excellent, but with the updates, it has become very slow and it is not possible to login with the fingerprint or the quick code.	محمد الجوفي	##########	عزيزي العميل، نشكرك لتقييم خدمة فرنسي موبايل. يسعدنا خدمتكم	##########	0	ar	us		1	ar	application excellent update become slow possible login fingerprint quick code	Negative	1	0	1
Google Play Store	7b4c434f-aa14-425e-be30-5edcef317815	The latest update is very slow and boring.	eyad abdelrehim	##########	عزيزي العميل، يؤسفنا سماع ذلك و نعمل جاهدين على تحسين و تطوير خدماتنا و منتجاتنا. رضاكم غايتنا	##########	2	ar	us		2	ar	late update slow bore	Negative	0	0	1
Google Play Store	f2c5f40d-fa3b-4e98-b529-0e8e467fbd9b	Very very very slow.	بندر المطوع	##########	عزيزي العميل, يؤسفنا سماع ذلك ونعمل جاهدين على تحسين وتطوير خدماتنا ومنتجاتنا. رضاكم غايتنا	##########	0	ar	us		1	ar	slow	Negative	0	0	1
Google Play Store	f38aad60-0fe8-4a51-8986-b809f6828a74	Unfortunately, the application has become very bad with the latest updates and now for three days it does not accept transfers and it hinders our interests. When I called the bank, the automated response said that they cannot serve us during the Eid holiday period. By the grace of God, when the work resumes, the first steps will be to transfer the salary to another bank that respects the customer…	التركي	##########	عزيزي العميل، لنتمكن من مساعدتك يرجى منكم التواصل مع الدعم الفني من خلال البريد الإلكتروني FransiMobileAdmin@alfransi.com.sa. نسعد بخدمتك	##########	0	ar	us		1	ar	unfortunately application become bad late update three days accept transfer hind interest call bank automate response say serve us eid holiday period grace god work resume first step transfer salary another bank respect customer loss trust	Negative	1	1	0
Google Play Store	0753d1ae-12db-437c-92cf-f7942de82189	Very bad, always making excuses, the worst.	maha mohammed	##########	عزيزي العميل، يؤسفنا سماع ذلك و نعمل جاهدين على تحسين و تطوير خدماتنا و منتجاتنا. رضاكم غايتنا	##########	0	ar	us		1	ar	bad always make excuse bad	Negative	1	0	0
Google Play Store	f7a6d3f9-2a5e-411c-982e-04fd5eaea566	A French person needs a mobile phone with high performance, as the current one is very slow. Dear relationship manager, I have noticed the same response being repeated and the same complaint. Please relay these observations to the appropriate authorities. The bank is great but it needs more interaction.	husni kutbi	##########	عزيزي العميل, يؤسفنا سماع ذلك و نعمل جاهدين على تحسين و تطوير خدماتنا و منتجاتنا. رضاكم هي غايتنا.	##########	2	ar	us		5	ar	french person need mobile phone high performance current one slow dear relationship manager notice response repeat complaint please relay observations appropriate authorities bank great need interaction	Negative	1	0	1
Google Play Store	40c5f031-1ad4-48e2-8719-34d488fa3b79	Very slow application.	Majed	##########	عزيزي العميل, يؤسفنا سماع ذلك ونعمل جاهدين على تحسين وتطوير خدماتنا ومنتجاتنا. رضاكم غايتنا	##########	0	ar	us		1	ar	slow application	Negative	0	0	1
Google Play Store	ee2d6c5a-4943-4ae5-8b87-d137d9ea89cf	It's so slow that it annoys you and drains your soul trying to move from one step to another, it just keeps spinning for an hour.	الحمدلله	##########	عزيزي العميل, يؤسفنا سماع ذلك ونعمل جاهدين على تحسين وتطوير خدماتنا ومنتجاتنا. رضاكم غايتنا	##########	0	ar	us		1	ar	slow annoy drain soul try move one step another keep spin hour	Negative	1	0	1
Google Play Store	3c4612e6-a8f6-4f16-a0f5-5b02c5221224	A very very very slow application that does not work properly. It is extremely bad. I advise against using it, and I rate it zero out of a million.	ابومحمد محمد	##########	عزيزي العميل, يؤسفنا سماع ذلك ونعمل جاهدين على تحسين وتطوير خدماتنا ومنتجاتنا. رضاكم غايتنا	##########	6	ar	us		1	ar	slow application work properly extremely bad advise use rate zero million	Negative	1	1	1
Google Play Store	ca9593a8-dc8e-47ac-80cd-c699f70b170b	The application is very bad and full of problems. It frustrates you to the point that I want to close my account at the bank. If there was an option for less than one star, it wouldn't even deserve a star.	Y T	2023-04-06 07:27:00	عزيزي العميل, يؤسفنا سماع ذلك ونعمل جاهدين على تحسين وتطوير خدماتنا ومنتجاتنا. رضاكم غايتنا	##########	0	ar	us		1	ar	application bad full problems frustrate point want close account bank option less one star wouldnt even deserve star	Negative	1	0	0
Google Play Store	a5f28a3b-86a8-4431-9bbe-26b52d3128c4	There is a problem with the conversion that has not been resolved, and unfortunately, the technical support has not been able to solve it either.	Maree Alqahtany	##########	عزيزي العميل, لنتمكن من مساعدتك يرجى التواصل مع الدعم الفني من خلال البريد الإلكتروني FransiMobileAdmin@alfransi.com.sa. نسعد بخدمتك	##########	2	ar	us		1	ar	problem conversion resolve unfortunately technical support able solve either	Negative	0	1	0
Google Play Store	fa97d0a4-3a31-4eaf-9515-af58f6d1b78c	Very bad application... Despite the numerous updates, it hasn't provided anything new. It's very slow... It takes a light year to move from one step to another. Although I contacted the banking phone support and explained the problem, the issue of slowness hasn't been resolved.	Fatimah Ibrahim	##########	عزيزي العميل, يؤسفنا سماع ذلك و نعمل جاهدين على تحسين و تطوير خدماتنا ومنتجاتنا. رضاكم هو غايتنا.	##########	41	ar	us		1	ar	bad application despite numerous update hasnt provide anything new slow take light year move one step another although contact bank phone support explain problem issue slowness hasnt resolve	Negative	1	1	1
Google Play Store	44ca5a17-b8b9-421c-a6eb-f540a40eaca7	The worst application in the Kingdom of Saudi Arabia and the Arab world, unfortunately.	majid Shakhas	2023-04-02 09:04:00	عزيزي العميل, يؤسفنا سماع ذلك ونعمل جاهدين على تحسين وتطوير خدماتنا ومنتجاتنا. رضاكم غايتنا	##########	0	ar	us		1	ar	bad application kingdom saudi arabia arab world unfortunately	Negative	1	0	0
Google Play Store	4a20588c-c275-4c66-8b58-5db24ddcda8c	Wake up, French Bank, the whole world is complaining about the poor application.	Abood H	2023-04-02 08:41:00	عزيزي العميل, يؤسفنا سماع ذلك ونعمل جاهدين على تحسين وتطوير خدماتنا ومنتجاتنا. رضاكم غايتنا	##########	0	ar	us		1	ar	wake french bank whole world complain poor application	Negative	1	0	1
Google Play Store	20a7abb8-d959-41fa-af0d-e4b71b1e8fdb	The worst application and the worst bank, I swear by God."	Hattan Yasser	2023-04-02 01:51:00	عزيزي العميل, يؤسفنا سماع ذلك ونعمل جاهدين على تحسين وتطوير خدماتنا ومنتجاتنا. رضاكم غايتنا	##########	0	ar	us		1	ar	bad application bad bank swear god	Negative	1	0	0
Google Play Store	b300ed02-0e44-4a01-a360-bd09af41f752	The application has not been working properly for two weeks and the issue has not been resolved.	Sabri Elhassan	##########	عزيزي العميل, لنتمكن من مساعدتك يرجى التواصل مع الدعم الفني من خلال البريد الإلكتروني FransiMobileAdmin@alfransi.com.sa. نسعد بخدمتك	##########	0	ar	us		5	ar	application work properly two weeks issue resolve	Negative	0	1	0
Google Play Store	afa770f1-4b2a-43dd-98ba-86100886c7b5	The application is garbage and very bad. Its name should be changed to "Turtle 🐢." The French bank's application, Al Rajhi and Al Ahli, is used by millions and is excellent. This application, on the other hand, is used by only 100 people and is extremely bad, without any competition.	لاتعليق لاتعليق	##########	عزيزي العميل, يؤسفنا سماع ذلك ونعمل جاهدين على تحسين وتطوير خدماتنا ومنتجاتنا. رضاكم غايتنا	##########	0	ar	us		1	ar	application garbage bad name change turtle french bank application al rajhi al ahli use millions excellent application hand use people extremely bad without competition	Negative	1	0	0
Google Play Store	0c8aa86c-92c3-4614-801d-f3def1dc4292	Excellent very very very	حسين كريري	##########	عزيزي العميل, نشكركم على ثقتكم بالبنك السعودي الفرنسي ونتطلع دائما لرضا عملائنا. رضاكم غايتنا	##########	0	ar	us		5	ar	excellent	Positive	0	0	0
Google Play Store	4a6824bc-4f21-4c02-a86f-1019867e7975	Very very bad and there is absolutely no attention or response. (I have the Rajhi app, which is a major and vast difference.)	حمود الحربى	##########	عزيزي العميل, يؤسفنا سماع ذلك ونعمل جاهدين على تحسين وتطوير خدماتنا ومنتجاتنا. رضاكم غايتنا	##########	1	ar	us		1	ar	bad absolutely attention response rajhi app major vast difference	Negative	1	0	0
Google Play Store	0f3df2a8-effb-42c5-8327-425feb277060	All banks can be accessed online except for the French bank; you must physically go to the bank. Shame on you!	abo mezo	##########	عزيزي العميل, نشكر لكم تواصلكم وسيتم رفع اقتراحاتكم للإدارات المعنية. رضاكم غايتنا	##########	0	ar	us		1	ar	bank access online except french bank must physically go bank shame	Negative	1	1	0
Google Play Store	90aff6c1-da16-40b0-b39b-3cae1f7e4267	"This application is the worst I have dealt with on Earth, and the bank I worked with is the worst as well. It's a shame that I even gave it a star just so I can leave a review."	Man Soor	##########	عزيزي العميل, يؤسفنا سماع ذلك ونعمل جاهدين على تحسين وتطوير خدماتنا ومنتجاتنا. رضاكم غايتنا	##########	0	ar	us		1	ar	application bad deal earth bank work bad well shame even give star leave review	Negative	1	0	0
Google Play Store	e90b4cd1-c1cd-4be0-89fb-be8c02072d16	All the banks have developed through programs, except for this bank which is still bad and has no solution. Therefore, I will end my dealings with them.	الرحال	##########	عزيزي العميل, يؤسفنا سماع ذلك ونعمل جاهدين على تحسين وتطوير خدماتنا ومنتجاتنا. رضاكم غايتنا	##########	0	ar	us		1	ar	bank develop program except bank still bad solution therefore end dealings	Negative	1	0	0
Google Play Store	2de50fe3-f73f-4bc5-a8ce-92a389a6da93	Good	adm alsaleh	##########	عزيزي العميل, نشكركم على ثقتكم بالبنك السعودي الفرنسي ونتطلع دائما لرضا عملائنا. رضاكم غايتنا	##########	0	ar	us		3	ar	good	Positive	0	0	0
Google Play Store	81a78db4-892e-459f-a8da-92813ce2df17	It is not working properly in general.	Mustafa Al	##########	عزيزي العميل, لنتمكن من مساعدتك يرجى التواصل مع الدعم الفني من خلال البريد الإلكتروني FransiMobileAdmin@alfransi.com.sa. نسعد بخدمتك	##########	0	ar	us		1	ar	work properly general	Negative	0	1	0
Google Play Store	5861fd8c-3f1f-440c-9bec-67eac8025284	Excellent	ابوشجاع الساروت	##########	Dear customer, Thank you for your trust on BSF services. Your satisfaction is our main goal	##########	0	ar	us		5	ar	excellent	Positive	0	0	0
Google Play Store	e3c37135-fa7d-4b22-a51b-4a2af365113e	Every now and then, he wants an update.	عاطف محمود ابوشنب	##########	عزيزي العميل, يؤسفنا سماع ذلك ونعمل جاهدين على تحسين وتطوير خدماتنا ومنتجاتنا. رضاكم غايتنا	##########	0	ar	us		1	ar	every want update	Neutral	0	1	0
Google Play Store	40231191-047a-4b1f-85e8-98cb530bf0e1	The program is bad and slow. I am going to change the bank.	Hussin Alid	##########	عزيزي العميل, يؤسفنا سماع ذلك ونعمل جاهدين على تحسين وتطوير خدماتنا ومنتجاتنا. رضاكم غايتنا	##########	0	ar	us		1	ar	program bad slow go change bank	Negative	1	0	1
Google Play Store	fc1da9c6-c79f-4b90-9222-843bd915f6fd	Your entire system is the worst, and that's why I withdrew all my creations.	Alamdh Alamdh1	##########	عزيزي العميل, يؤسفنا سماع ذلك ونعمل جاهدين على تحسين وتطوير خدماتنا ومنتجاتنا. رضاكم غايتنا	##########	0	ar	us		1	ar	entire system bad thats withdraw creations	Negative	1	0	0
Google Play Store	7b770610-eccd-451a-807a-41df64431023	The program is not working well.	Jd Dosi	##########	عزيزي العميل, لنتمكن من مساعدتك يرجى التواصل مع الدعم الفني من خلال البريد الإلكتروني FransiMobileAdmin@alfransi.com.sa. نسعد بخدمتك	##########	2	ar	us		1	ar	program work well	Negative	0	1	0
Google Play Store	8ff890d2-f5d8-4fff-8afe-209b9f86d858	Since yesterday, there has been a problem. A message appears saying that I have exceeded my activation code attempts, and then the user account locks. Every time I try to unlock the user account, I have to go through long and tedious steps. When I try to log in again, the same message keeps appearing.	Sara Almogren	##########	عزيزي العميل, لنتمكن من مساعدتك يرجى التواصل مع الدعم الفني من خلال البريد الإلكتروني FransiMobileAdmin@alfransi.com.sa. نسعد بخدمتك	##########	9	ar	us		1	ar	since yesterday problem message appear say exceed activation code attempt user account lock every time try unlock user account go long tedious step try log message keep appear	Negative	0	0	1
Google Play Store	91049c92-8f4a-4b9d-85e0-d4d0c5ea8edc	Trash	l LeveL	##########	عزيزي العميل, يؤسفنا سماع ذلك ونعمل جاهدين على تحسين وتطوير خدماتنا ومنتجاتنا. رضاكم غايتنا	##########	0	ar	us		1	ar	trash	Negative	1	0	0
Google Play Store	6c154624-a7ed-4730-91ff-14c2ab33b408	Unfortunately, I cannot choose a rating of less than one star. The application is very bad, with many malfunctions, and it will be one of the reasons to switch to other banks.	albaraa 33	##########	عزيزي العميل, يؤسفنا سماع ذلك ونعمل جاهدين على تحسين وتطوير خدماتنا ومنتجاتنا. رضاكم غايتنا	##########	10	ar	us		1	ar	unfortunately choose rat less one star application bad many malfunction one reason switch bank	Negative	1	1	0
Google Play Store	8872c476-e6e2-495b-b759-1fddaa8ddd12	New album	مبارك القحطاني	##########			0	ar	us		1	ar	new album	Positive	0	1	0
Google Play Store	c342400b-faff-4651-810d-38f39c0a1426	Failed, slow, and needs updates.	اللورد	##########	عزيزي العميل, يؤسفنا سماع ذلك ونعمل جاهدين على تحسين وتطوير خدماتنا ومنتجاتنا. رضاكم غايتنا	##########	0	ar	us		1	ar	fail slow need update	Negative	0	0	1
Google Play Store	1586dc38-33ef-4844-aa1a-2641a9103c7e	The application is very bad, it hangs and is slow.	‪HILAL ALKhamis (Abu Fatima)‬‏	##########	عزيزي العميل, يؤسفنا سماع ذلك ونعمل جاهدين على تحسين وتطوير خدماتنا ومنتجاتنا. رضاكم غايتنا	##########	0	ar	us		1	ar	application bad hang slow	Negative	1	0	1
Google Play Store	4fbba628-d4a4-4a1a-a960-31c29258de5c	Does not accept transfers to local banks, a the worst application and the worstbank.	ابراهيم ناصر	2023-03-02 09:26:00	عزيزي العميل, لنتمكن من مساعدتك يرجى التواصل مع الدعم الفني من خلال البريد الإلكتروني FransiMobileAdmin@alfransi.com.sa. نسعد بخدمتك	##########	1	ar	us		1	ar	accept transfer local bank bad application worstbank	Negative	1	0	0
Google Play Store	3360bfa0-d939-4138-b9e9-ba1eaace5679	Please delete the worst banking application from the store. After reviewing it, I can confidently say that the application is still the worst. It is disappointing for a well-known bank like yours to have an application of this level.	saleh aljean	2023-03-02 06:19:00	عزيزي العميل, يؤسفنا سماع ذلك ونعمل جاهدين على تحسين وتطوير خدماتنا ومنتجاتنا. رضاكم غايتنا	##########	1	ar	us		1	ar	please delete bad bank application store review confidently say application still bad disappoint wellknown bank like application level	Negative	1	0	0
Google Play Store	576c8936-cd9f-487d-951f-9ea203e6c081	"My device is Huawei and the application never opens. What could be the problem?"	AL-hamdan Mousa	2023-03-01 09:30:00	عزيزي العميل, لنتمكن من مساعدتك يرجى التواصل مع الدعم الفني من خلال البريد الإلكتروني FransiMobileAdmin@alfransi.com.sa. نسعد بخدمتك	##########	0	ar	us		1	ar	device huawei application never open could problem	Negative	0	1	0
Google Play Store	bad4ca05-ade2-4e0b-b405-cb61400ba02f	The only defect is slowness.	سليمان عبدالله	2023-03-01 07:04:00	عزيزي العميل, يؤسفنا سماع ذلك ونعمل جاهدين على تحسين وتطوير خدماتنا ومنتجاتنا. رضاكم غايتنا	##########	0	ar	us		4	ar	defect slowness	Negative	0	0	1
Google Play Store	3769621d-874c-443f-81ee-5a9600440f04	Very bad application, not worthy of recognition or competition.	لاتعليق	##########			0	ar	us		1	ar	bad application worthy recognition competition	Negative	1	0	0
Google Play Store	92b6ea08-e4a0-4bc5-a076-d747fd6172e2	Very good.	علي الدهيسي	##########			0	ar	us		4	ar	good	Positive	0	0	0
Google Play Store	33170b14-7954-48bd-89a8-9c3fdc16aa60	The internet is very slow and keeps disconnecting, and the services are not fast enough. It needs to be developed quickly.	basher ali alking	##########			1	ar	us		1	ar	internet slow keep disconnect service fast enough need develop quickly	Negative	0	0	1
Google Play Store	becf35ec-626d-4e42-8f86-158aba4e9fdc	A bad program and the worstbank, I wish them loss.	الخالدي	##########			0	ar	us		1	ar	bad program worstbank wish loss	Negative	1	0	0
Google Play Store	a7a5ceba-8bef-4bb9-b845-3062807e7a33	It doesn't even deserve a single star. The previous application was a thousand times better than this. Every time I enter data or a message, sometimes it arrives and sometimes it doesn't, and sometimes it's delayed. Programs should evolve towards better, not worse. Please improve the application and remove the message. Please improve your application to the extent that it's not the worst and slow…	سلطان الدوسري	##########	عزيزي العميل، يهمنا خدمتكم ونأمل منك تجربة النسخة الجديدة من خدمة فرنسي موبايل. الرجاء في حال واجهتك مشكلة ارسالها مباشرة للبريد الالكتروني FransiMobileAdmin@alfransi.com.sa اذا اردت ان نتصل بك. اضف رقم هاتفك الجوال عند ارسالك للبريد الإلكتروني	##########	2	ar	us		1	ar	doesnt even deserve single star previous application thousand time good every time enter data message sometimes arrive sometimes doesnt sometimes delay program evolve towards good bad please improve application remove message please improve application extent bad slow internet system year ad ask help developers al rajhi bank	Negative	1	0	1
Google Play Store	802b3b21-4667-4e9f-a860-7bc1a356282e	The application is slow in response and has many crashes.	Waleed Alsamti	##########			1	ar	us		2	ar	application slow response many crash	Negative	1	1	1
Google Play Store	d2c46dd2-a58d-4122-b0e1-bc44413473b7	The account number and the balance do not appear, even though transfers are made to it and I receive a message confirming that. Also, when I make a transfer, the account number does not appear. The card request service does not appear in the application.	امل العمري	##########			17	ar	us		2	ar	account number balance appear even though transfer make receive message confirm also make transfer account number appear card request service appear application	Negative	0	1	0
Google Play Store	d7a3d1e5-dd84-48c3-9027-c3853a2f1863	Excellent very strong excellent?????????	سالم الفيفي	##########			1	ar	us		5	ar	excellent strong excellent	Positive	0	0	0
Google Play Store	0808bcbe-05fb-4d95-9e25-67ffab563235	The application is very bad and extremely slow.	joy bientot	##########			0	ar	us		1	ar	application bad extremely slow	Negative	1	0	1
Google Play Store	b25a3a2b-9021-4ae9-b4d4-dd51b6132a5b	Zero sympathy for the loser who continues to ruin the application, more and more stupidity.	Roro 100	##########			1	ar	us		1	ar	zero sympathy loser continue ruin application stupidity	Negative	1	0	0
Google Play Store	83da3a9d-ca52-4848-b52d-9c87a59e122f	"Yuelaq."	نرجس ام علي	##########			0	ar	us		1	ar	yuelaq	Neutral	1	0	0
Google Play Store	1228d60b-c156-4209-8814-c20bc3fd9520	It has been more than 10 days and it is still suspended. A complaint has been filed and the problem has not been resolved until now.	طارق الشريف	##########			0	ar	us		1	ar	days still suspend complaint file problem resolve	Negative	0	1	1
Google Play Store	79d4b0a9-2e75-48d6-9c72-23ee4102e8c5	I am surprised by the negative comments and the bank's lack of response to customers as if they are not concerned.	محمد الرستم	##########			0	ar	us		1	ar	surprise negative comment bank lack response customers concern	Negative	1	0	0
Google Play Store	f162493a-291c-42b5-bb45-f84e077f3422	hateful	Faten hashem	##########			0	ar	us		2	ar	hateful	Negative	1	0	0
Google Play Store	2c827800-10f2-4dd3-ad32-97d75c193535	It does not work.	محمد الخواجي	##########			0	ar	us		1	ar	work	Negative	0	1	0
Google Play Store	0fc6120f-0109-47b1-9669-840cdd5a3e33	the worst application, failed, failed 👎👎👎 Slow, I have been trying for a week to log into my account, but unfortunately it doesn't open.	محمد الدوسري	##########			0	ar	us		1	ar	bad application fail fail slow try week log account unfortunately doesnt open	Negative	1	1	1
Google Play Store	e3a6feb5-ef94-40ca-be91-78674390e860	Very heavy, I wish there were ways to improve the application.	Ali Haider	##########			0	ar	us		1	ar	heavy wish ways improve application	Negative	0	0	1
Google Play Store	7d0be656-3246-49c9-b77d-3096a84bdb53	Very excellent 🇸🇦	مداوي المالكي	##########			0	ar	us		5	ar	excellent	Positive	0	0	0
Google Play Store	9048efa1-d15c-43b1-a3d6-dc11b9129e94	It is very slow and I couldn't do any operations because of the slowness it has.	فراس ابو مشعل	##########			0	ar	us		1	ar	slow couldnt operations slowness	Negative	0	0	1
Google Play Store	5c8e0982-b2f7-4d94-8595-50e591202b09	Very slow ... and it has no updates and those in charge are not interested.	Muhammed Eid	##########			20	ar	us		1	ar	slow update charge interest	Negative	0	0	1
Google Play Store	ab44ea76-8659-4a26-91b8-e6b2998df80c	"The worst bank application that I have ever come across in my life. Full of comments requesting beneficiary codes. It is worse than that, there is no system update. The bank is the worst. I ask Allah to delete the entire bank. By Allah, their work is the worst. Look for a programmer like others in the world. I swear you people are annoying to the extreme."	Holail Enazi	##########			0	ar	us		1	ar	bad bank application ever come across life full comment request beneficiary cod bad system update bank bad ask allah delete entire bank allah work bad look programmer like others world swear people annoy extreme	Negative	1	1	0
Google Play Store	fc073489-4708-43f0-afd2-ed8d129bf190	Very bad application, heavy, no updates, full of errors, and very slow.	سعود محسن العطوي	##########			22	ar	us		1	ar	bad application heavy update full errors slow	Negative	1	1	1
Google Play Store	4f71df93-a19a-4361-8cde-00619ac4ec0a	He complains and keeps saying that there is no internet connection, on top of that it is slow and stupid.	abdulah alhawas	##########			0	ar	us		1	ar	complain keep say internet connection top slow stupid	Negative	1	0	1
Google Play Store	79934b82-0044-440f-aa48-8b6a25a852f2	It does not work on Android.	علياء قيمز	2023-02-06 03:37:00			0	ar	us		1	ar	work android	Negative	0	1	0
Google Play Store	a303460d-2028-4c69-8023-081f4e433069	Excellent.	RfsggsS Nshif	2023-02-06 02:32:00			0	ar	us		5	ar	excellent	Positive	0	0	0
Google Play Store	f6234c8e-1b4e-49d9-bf39-ddaada9dc323	Unfortunately, after the updates, the application has become extremely slow and very bad. It deserves a lot of negative reviews.	Mohammed Aldayil	2023-02-05 05:48:00			8	ar	us		1	ar	unfortunately update application become extremely slow bad deserve lot negative review	Negative	1	0	1
Google Play Store	839609f0-8586-4f57-ac18-b268c4390ced	The application is slow, dumb, and useless. It keeps freezing and always has problems. I prefer to use the SABB Bank application instead.	Ali AlAshwal	##########			7	ar	us		1	ar	application slow dumb useless keep freeze always problems prefer use sabb bank application instead	Negative	1	1	1
Google Play Store	7f62451c-ae54-46e2-a083-d8f8a6a4d226	The application is experiencing frequent malfunctions and hasn't been responsive or opening for more than two days, whether through fingerprint or code.	Mohammed, Hassan Yahya	##########			12	ar	us		1	ar	application experience frequent malfunction hasnt responsive open two days whether fingerprint code	Negative	0	1	0
Google Play Store	56d22521-2411-47c6-9cf1-201f134871c8	The application is extremely slow. We hope the problem can be resolved and the application interface can be made easier like Al-Rajhi and Al-Ahli, and the application can be made faster.	ترزرن تثنبن	##########			0	ar	us		1	ar	application extremely slow hope problem resolve application interface make easy like alrajhi alahli application make fast	Negative	0	0	1
Google Play Store	bb940034-3f3c-4caf-b28f-c8334b0e5199	It is unfortunate that it does not work, as it is one of the worst banking applications.	Abdulelah 11c	##########			0	ar	us		1	ar	unfortunate work one bad bank applications	Negative	1	1	0
Google Play Store	9ffa73d3-5162-4ed5-8e70-5645caffff0a	Very bad application, it hangs, it's slow, and doesn't deserve even a quarter of a star.	عبدالعزيز الحربي	##########			2	ar	us		1	ar	bad application hang slow doesnt deserve even quarter star	Negative	1	0	1
Google Play Store	ae0f02ac-1094-41da-a77b-1bfddc1539b3	Thank you.	fm fm	##########			0	ar	us		1	ar	thank	Positive	0	0	0
Google Play Store	6d970899-ecb9-43a3-ba00-b7c021d4d52a	The application is lousy after the update... Banks have developed their applications, except for this bank. Now, I want to change my password, and it asks for a call and approval code. Then it says the password should contain consecutive numbers or letters, which it is not. Well, tell me before the call and sending the activation code.	majed alasmary	##########			1	ar	us		1	ar	application lousy update bank develop applications except bank want change password ask call approval code say password contain consecutive number letter well tell call send activation code	Negative	1	1	0
Google Play Store	599f8fcd-6201-430e-abeb-9c5872120f7d	Very beautiful.	هادي الصحبي	##########			0	ar	us		5	ar	beautiful	Positive	0	0	0
Google Play Store	6d3c6d73-c1ba-4b45-a0a2-53ae7e381b59	I can't log in. I deleted it 100 times and reinstalled the stupid application.	Bahjat Kalantan	##########			0	ar	us		1	ar	cant log delete time reinstall stupid application	Negative	0	1	0
Google Play Store	6c46f905-da67-46d1-ba87-1e35ee2bbde5	As an easy-to-use application.	Mohamed Almousa	##########			1	ar	us		4	ar	easytouse application	Positive	0	0	0
Google Play Store	e67156e9-1735-4644-9e7e-9b0004f3f2e4	The update has errors. I can't access my account, and it shows incorrect date and time settings. Why?	This is me	##########			8	ar	us		1	ar	update errors cant access account show incorrect date time settings	Negative	0	1	0
Google Play Store	35214820-c673-48c6-809d-60c3be0d4cb8	Very, very slow.	Mahmood Abdullah	##########			0	ar	us		1	ar	slow	Negative	0	0	1
Google Play Store	da728bc8-669a-4f83-9e9e-427935904553	The bank is very excellent.	Ebrahem Jefri	##########			0	ar	us		5	ar	bank excellent	Positive	0	0	0
Google Play Store	a573bfdd-8102-4941-9d11-3bf218121252	Very bad, unfortunately it needs more development.	‪Majed Almalki (ABO LARIN)‬‏	##########			2	ar	us		1	ar	bad unfortunately need development	Negative	1	0	0
Google Play Store	820aa96f-d56c-4c07-a59a-cb4dd7ed7677	I wish you would update the program because it is not interactive and poorly user-friendly. For example, after adding an invoice, the invoice will not appear until you log in again.	Turki Adnan	2023-01-01 08:12:00			3	ar	us		2	ar	wish would update program interactive poorly userfriendly example add invoice invoice appear log	Negative	1	1	0
Google Play Store	07cbc193-a9ba-4418-9867-03b96ec66889	I cannot access my account from the application at all.	Alaa Jamel	##########			0	ar	us		1	ar	access account application	Negative	0	1	0
Google Play Store	82641ef1-881c-4d0c-9644-6504dcf7488c	When I requested to review my cards, I received an error and was unable to pay the card dues. Also, a transfer was made to my account but did not appear in the account balance. I received a message on my mobile stating that a remittance had been received. The application is very unsuccessful and does not serve the customer.	لين شهاب	##########			22	ar	us		1	ar	request review card receive error unable pay card dues also transfer make account appear account balance receive message mobile state remittance receive application unsuccessful serve customer	Negative	0	1	0
Google Play Store	fe4d0e32-a17c-4c64-8343-5d6b9ea75a8d	Done	Amar Ahmed	##########			0	ar	us		5	ar	do	Positive	0	1	0
Google Play Store	8f2c63ee-4b66-4cb0-8b7f-7d1daf818dc7	Failure	سطام فايز	##########			0	ar	us		1	ar	failure	Negative	0	1	0
Google Play Store	488ee1e6-8309-4eca-b18b-a54bfcaa32af	Excellent and deserves five stars.	ناصر	##########			0	ar	us		5	ar	excellent deserve five star	Positive	0	0	0
Google Play Store	42592558-1d8f-4703-a7bd-39d45fe26fdd	Very bad application.	ابو سعود البقمي (‪åвμ såμd‬‏)	##########			0	ar	us		1	ar	bad application	Negative	1	0	0
Google Play Store	3b3a672e-46f4-4fd2-8d36-7d73946acc76	Very, very bad. It freezes and doesn't provide the code number. Every time I enter.	حبيب قلبي	##########			8	ar	us		1	ar	bad freeze doesnt provide code number every time enter	Negative	1	0	1
Google Play Store	c1de3296-af93-4bbf-8f03-ae59abd4a75b	It is done.	ابو محمد	##########			0	ar	us		5	ar	do	Neutral	0	1	0
Google Play Store	a0227c19-da93-446c-96fb-1b76caa53519	bad	عبدالرحمن الذيب	##########			0	ar	us		1	ar	bad	Negative	1	0	0
Google Play Store	493d6f67-46b5-40e0-8108-692f053d18d6	Very bad. I hope they take inspiration from the Rajhi or AlBilad mobile application to improve the style of the French application. These banks' applications are very primitive and are only suitable for publishing.	انا انا	##########			1	ar	us		1	ar	bad hope take inspiration rajhi albilad mobile application improve style french application bank applications primitive suitable publish	Negative	1	0	0
Google Play Store	3bf8ce3e-af40-4560-83fc-cfbbb316c6a9	Excellent	Ali Khalifa	##########			0	ar	us		5	ar	excellent	Positive	0	0	0
Google Play Store	ad515ba6-c192-4933-a07f-5e4cabbc96d6	What is the benefit of updating if the application still does not support transfers sharing?	عزيز سعود	##########			5	ar	us		1	ar	benefit update application still support transfer share	Negative	0	1	0
Google Play Store	ef710f93-622c-4970-8701-82c9658a1345	Excellent and easy.	ريان الحكمي	##########			0	ar	us		5	ar	excellent easy	Positive	0	0	0
Google Play Store	9c88d547-6fb5-4608-8941-1e1c39905fe5	The application is very bad, it freezes and even when I enter the correct password, it says there is an error. But if I create a new code, it opens, and after a short period, less than a week or four days, the same problem returns.	khaled bo shahad	##########			10	ar	us		5	ar	application bad freeze even enter correct password say error create new code open short period less week four days problem return	Negative	1	1	1
Google Play Store	3efa43c1-b3e1-402f-bfdc-bd59ca5a29c0	It doesn't work, unfortunately.	Saqr AlJohani	##########			0	ar	us		1	ar	doesnt work unfortunately	Negative	0	1	0
Google Play Store	8cec931a-fcca-487d-8aaa-2a4e6211e2ff	The worst banking application.. It denies logging in and asks for username activation, and refuses with the excuse that the ATM PIN is incorrect.. Overall, it is an extremely stupid application.	مشعل عبدالرحمن	##########			0	ar	us		1	ar	bad bank application deny log ask username activation refuse excuse atm pin incorrect overall extremely stupid application	Negative	1	1	0
Google Play Store	26d7f5b2-5c6b-4f7d-9222-47204389c562	Unfortunately, I try many times to charge my phone, but it refuses to charge. Also, when I try to add a person for transfer, the Al Ahli program does not accept it. Ahli is much better.	M J	##########			1	ar	us		1	ar	unfortunately try many time charge phone refuse charge also try add person transfer al ahli program accept ahli much good	Negative	0	1	0
Google Play Store	882903be-dc86-4b47-9c7e-249098ae8ebd	Good	ابو المرادي أل القاضي	##########			0	ar	us		4	ar	good	Positive	0	0	0
Google Play Store	3be1798f-6a14-400a-9e3f-fcfff0db69b6	The comment is abnormal and the app always closes by itself. Advice for those who have low blood pressure: download the app, it will help improve their blood pressure.	وائل الراضي	##########			4	ar	us		1	ar	comment abnormal app always close advice low blood pressure download app help improve blood pressure	Neutral	1	1	0
Google Play Store	e2fd9757-656e-43ff-9fe3-bb27a51dc728	The application has not been opening for two days. Please fix the issue.	ABH ABOOD SKETSH	##########			0	ar	us		1	ar	application open two days please fix issue	Negative	0	1	0
Google Play Store	7e09e2a2-80a5-400d-9e30-6ec607b05836	Okay	بن باز عسيري	##########			0	ar	us		5	ar	okay	Positive	0	0	0
Google Play Store	ea23e03b-ffc7-4ffc-9fc1-480e98a2cf79	It has become heavy and there is always an error.	السيد ايمن مهدي	##########			0	ar	us		2	ar	become heavy always error	Negative	0	0	1
Google Play Store	769cac56-2479-4820-a007-01724f4e2b5d	Excellent and we hope you can add a service for updating information and fingerprint.	أحمد قدري	##########			0	ar	us		5	ar	excellent hope add service update information fingerprint	Positive	1	1	0
Google Play Store	ba237914-fe15-462a-a58b-a99f7d7eca79	Honestly, it's the worst program. It keeps freezing. What's the problem? You need to fix it.	Tulip Rose 84	##########			0	ar	us		1	ar	honestly bad program keep freeze whats problem need fix	Negative	1	1	1
Google Play Store	0245ecc5-5756-40c0-9b30-c90664b7a83e	The app sometimes hangs... But it is nice and organized.	hawraa ali	##########			0	ar	us		2	ar	app sometimes hang nice organize	Positive	1	0	1
Google Play Store	cff74317-071e-4723-90ab-ddc23fa2e55e	To anyone who doesn't have high blood pressure or diabetes, my advice is not to use the French Bank. It will give you high blood pressure, sugar, and possibly a stroke. It's a the worst application with a terrible service and customer support. There is no achievement in three days, and when I called them, they told me to go to the branch. Why have an application if I have to visit the branch? It'…	hd hd	##########			0	ar	us		1	ar	anyone doesnt high blood pressure diabetes advice use french bank give high blood pressure sugar possibly stroke bad application terrible service customer support achievement three days call tell go branch application visit branch bad worstbank rat bank	Negative	1	0	0
Google Play Store	87391572-9936-49a3-855a-51138abd3922	Excellent	Khalid	##########			0	ar	us		5	ar	excellent	Positive	0	0	0
Google Play Store	b14a546e-5556-4784-8830-7ad7510bf235	The application became very slow, heavy and cumbersome after the update.	مايكبرني لقب	##########			0	ar	us		1	ar	application become slow heavy cumbersome update	Negative	0	0	1
Google Play Store	06fba3f8-e58f-488d-a2d1-19f9b044beaa	There is a problem with the program, it does not open.	salooom ksa	##########			0	ar	us		1	ar	problem program open	Negative	0	1	0
Google Play Store	d5925e60-add9-4a98-a139-21a13b8635f9	Excellent, very, very, very good.	soso mo	##########			0	ar	us		5	ar	excellent good	Positive	0	0	0
Google Play Store	87c25713-7066-4084-8652-19e8b2bd57b8	Terrible in every sense of the word, a heavy program and the worstbank. I have dealt with most banks, but the French one is the worst.	الشاهين	##########			0	ar	us		1	ar	terrible every sense word heavy program worstbank deal bank french one bad	Negative	1	0	1
Google Play Store	3f9251ac-bbb5-40b1-aece-1d9f53e1eef4	We kindly request to modify the latest update of the application because for the past 5 days, it has not been opening. Unfortunately, it is stuck on the login page only. We enter the data and everything, but it shows an error occurred.	Dh Ggfy	##########			0	ar	us		1	ar	kindly request modify late update application past days open unfortunately stick login page enter data everything show error occur	Negative	0	1	1
Google Play Store	884064e3-3958-4e4e-a3d3-9547595d28d1	the worst in every sense of the word. An inappropriate application that doesn't suit carrying your bank's name.	A D	##########			0	ar	us		1	ar	bad every sense word inappropriate application doesnt suit carry bank name	Negative	1	0	0
Google Play Store	218aa4b2-d635-4edc-a3b5-93a0d3b04dec	Problem with accessing the account for over a week.	كايد هم	##########			0	ar	us		1	ar	problem access account week	Negative	0	1	0
Google Play Store	cea78c75-3232-4b37-ada3-87069701dfe5	The program is not valid. Whenever I try to register, it rejects the registration.	Eid Alharbi-24	##########			0	ar	us		1	ar	program valid whenever try register reject registration	Negative	0	1	0
Google Play Store	07accca7-ee69-4844-beb8-7330957a314a	It used to be wonderful, now I am the most miserable.	Pradoian Pradoian	##########			0	ar	us		1	ar	use wonderful miserable	Negative	0	0	0
Google Play Store	5ab74db7-d405-4906-8057-8669040bb248	The best bank and the best application. Thank you for the amazing application and thank you for the excellent service.	NightmareReapers	##########			0	ar	us		5	ar	best bank best application thank amaze application thank excellent service	Positive	0	0	0
Google Play Store	36d65df6-b63c-4a0b-b9b3-6bc2c3fdf504	The new update does not open for me. Please solve the problem. Thank you.	تركي القحطاني	##########			0	ar	us		2	ar	new update open please solve problem thank	Negative	0	1	0
Google Play Store	5ec29033-f6bc-4b59-a396-d27dcbf1b89e	The heaviest application in the world and the remittance service is not working, it gives "Cannot process the transaction now" (always).	Mohamed AlZafran	##########			3	ar	us		1	ar	heavy application world remittance service work give process transaction always	Negative	0	0	1
Google Play Store	44ce2694-4c76-42a5-9c4d-e8bcba1d56e3	There is a problem with the application when opening it and entering the received code, the program closes itself.	Ajalil Shabib	##########			5	ar	us		1	ar	problem application open enter receive code program close	Negative	0	1	0
Google Play Store	bf547e64-ceef-4ba0-88d0-6d966b8652e2	The application has many problems and unfortunately, it frequently freezes.	محمد اليماني	##########			1	ar	us		1	ar	application many problems unfortunately frequently freeze	Negative	0	1	1
Google Play Store	957b14cf-0ea3-47d3-a0b3-8a920a5a4c8b	Does not even deserve one ⭐ star, it's a complicated and difficult login program.	rute ghnm	##########			0	ar	us		1	ar	even deserve one star complicate difficult login program	Negative	1	1	0
Google Play Store	09f5cabd-540e-49fc-8e05-e86b0fb09e6a	As a preliminary experience, it is very excellent.	حـامـد الـجـهـنـي	##########			0	ar	us		5	ar	preliminary experience excellent	Positive	1	0	0
Google Play Store	6b5c9c01-d964-4a01-818b-a417755ffc26	Why doesn't the message come?	Khan Khan	##########			0	ar	us		5	ar	doesnt message come	Negative	0	1	0
Google Play Store	52b1ee65-6ad2-4613-9037-0366d372d389	Very bad because there is no option to print the full IBAN certificate either on the application or at the self-service machine. I have to go to the branch and ask them for it.	Ismail ALghamdi	##########			0	ar	us		1	ar	bad option print full iban certificate either application selfservice machine go branch ask	Negative	1	1	0
Google Play Store	f1b1e69e-91bd-4aed-b9f9-774ed58c9b24	He hangs up in a disgusting way, and then you receive a message saying the service is currently unavailable for the past two days.	Abdulrahman H	##########			0	ar	us		1	ar	hang disgust way receive message say service currently unavailable past two days	Negative	1	1	1
Google Play Store	6c71c1ea-e644-48ba-8151-dc9d090e8509	There is a problem with the new version, I cannot log into the account. It asks me to activate the username, and I do it and enter the activation code, but it is of no use. It always says the username is currently suspended. Please fix the problem.	Amal Amal	##########			5	ar	us		1	ar	problem new version log account ask activate username enter activation code use always say username currently suspend please fix problem	Negative	0	1	0
Google Play Store	5fa8d8f0-f409-495b-8f62-16d2cc3b3281	Good.	Ashraf Ashraf	##########			0	ar	us		5	ar	good	Positive	0	0	0
Google Play Store	6c931c1f-c05f-4566-8022-0298a0029f78	Excellent.	hamzah alslahat	##########			0	ar	us		5	ar	excellent	Positive	0	0	0
Google Play Store	d7921353-b838-4115-bb16-0987a97b09e0	Why isn't he willing to take responsibility for me?	فاطمة الحبيب	##########			0	ar	us		2	ar	isnt will take responsibility	Negative	1	0	0
Google Play Store	b86983c2-5a99-477f-a66c-ceed5b1850aa	The program requests access permission to photos and media! Why?	Yasser M	##########			0	ar	us		1	ar	program request access permission photos media	Neutral	0	1	0
Google Play Store	9e99e13c-bc0b-4da5-8334-ea7657d6788c	It's not working, see what's going on.	Sayed Elsergany	##########			0	ar	us		1	ar	work see whats go	Negative	0	1	0
Google Play Store	83fae1db-f9e0-4796-85d4-e255a9412c48	An excellent experience. May God grant success to those responsible for developing banking services in Egypt.	hamad Alnoor	##########			0	ar	us		5	ar	excellent experience may god grant success responsible develop bank service egypt	Positive	1	0	0
Google Play Store	fbdc3a5f-efcb-4bef-b205-a40a236017cd	The latest update removed all the beneficiaries of the transfers, and now the problem is returning them again.	Ameeri Hussain	##########			11	ar	us		3	ar	late update remove beneficiaries transfer problem return	Negative	0	1	0
Google Play Store	ac4f2098-39ba-4fb8-bb9b-8eeefaa86d6d	May your dignity endure, oh country, and may security and safety endure.	احمد حسن مباركي	##########			0	ar	us		5	ar	may dignity endure oh country may security safety endure	Positive	1	0	0
Google Play Store	87f38516-816f-4669-82d9-7d432a58497c	Good	ibrahim abo tahir	##########			0	ar	us		5	ar	good	Positive	0	0	0
Google Play Store	81cb576d-b7ab-4c97-859b-15d4d8f2d107	The application is very bad in most of its services, and also the app developers do not show any interest in customers.	bader alotaibi	##########			0	ar	us		1	ar	application bad service also app developers show interest customers	Negative	1	0	0
Google Play Store	b1902e9c-ffb8-4e78-9985-48758a58378e	Honestly, the French online is all in English and I need to translate it to Arabic, but I don't know how.	ابراهيم عبد العزيز رمضان	##########			0	ar	us		1	ar	honestly french online english need translate arabic dont know	Negative	1	0	0
Google Play Store	d8ba05da-cf80-4b9d-b643-26dee7b022cf	Difficulty logging in	ayman nk	##########			0	ar	us		1	ar	difficulty log	Neutral	0	0	0
Google Play Store	02cbff51-a5f4-4761-8ab0-0191abe4e368	A the worst application and we will not continue with you due to your inefficiency in customer service.	Hadi Hadi	##########			0	ar	us		1	ar	bad application continue due inefficiency customer service	Negative	1	0	0
Google Play Store	08e236a2-1b15-42a6-ad8b-2c3244865ee7	Unfortunately, the application is not working and I have tried multiple times to log in, but sorry, it was blocked.	أمين فارس	##########	عزيزي العميل, لنتمكن من مساعدتك يرجى منكم التواصل مع خدمة العملاء على الرقم 920000576 تسعدني خدمتك	##########	0	ar	us		4	ar	unfortunately application work try multiple time log sorry block	Negative	1	1	0
Google Play Store	6c430869-8071-4e3d-9ddf-701910f7a24b	Bad application	عمر العتيبي	##########			0	ar	us		1	ar	bad application	Negative	1	0	0
Google Play Store	ea26f357-5c25-4757-b127-ebf4f172251b	It is about her a lot.	Hdhhd Jsjsid	##########			0	ar	us		3	ar	lot	Neutral	0	0	0
Google Play Store	5d288864-0d75-4b57-babb-8e24c92d3b3e	Unfortunately, the latest update does not open and keeps standing on the login page. When we press "login," it does not respond. We kindly request you to fix the problem.	Ebrahim Lashraf	##########			41	ar	us		1	ar	unfortunately late update open keep stand login page press login respond kindly request fix problem	Negative	0	1	0
Google Play Store	040ed751-fb91-4901-9435-e6fd5e26d4dc	The worst bank, the worst application, the worst services. But I promise you the first thing I will do is transfer my account and salary from you. If there were less than one star, I would have given it. It still remains the worst and the most miserable. My advice is to stay away from it. The application takes half an hour just to make a transfer, and then it tells you that the transfer cannot be…	Ahmed Zahrani	##########			1	ar	us		1	ar	bad bank bad application bad service promise first thing transfer account salary less one star would give still remain bad miserable advice stay away application take half hour make transfer tell transfer make	Negative	1	0	0
Google Play Store	3c3f9d4c-15f5-4b98-95b3-c2c3bc49d9dd	May God bless you, I recommend it.	VIP ER	##########			0	ar	us		5	ar	may god bless recommend	Positive	1	0	0
Google Play Store	40cb5b2b-f190-4964-b8da-c82746e247e6	There are problems with the application when logging in. A message appears saying "logged in", but the page is frozen and the application does not open.	Saad Shlowe	##########			0	ar	us		3	ar	problems application log message appear say log page freeze application open	Negative	0	1	1
Google Play Store	d182efd8-209b-4f14-b1d8-53301580f286	The application is slow, freezes a lot, and lacks a store.	نايف التركي	##########			0	ar	us		3	ar	application slow freeze lot lack store	Negative	1	0	1
Google Play Store	bf5a2123-30bc-48eb-b4d4-4eda379b410e	The application used to be one of the best, but now it has become one of the worst applications. Every time I try to access my account, it doesn't work and tells me the password is incorrect. And sometimes it says that I'm logged in on multiple devices, which is not true. It's really disappointing for a global bank like the French Bank that they are unable to fix this problem. I hope they keep up…	Roja Rawas	2022-09-08 03:51:00			0	ar	us		1	ar	application use one best become one bad applications every time try access account doesnt work tell password incorrect sometimes say im log multiple devices true really disappoint global bank like french bank unable fix problem hope keep fastpaced development happen various sectors try catch else lose lot customers today application like wallet wherever go problem definitely issue might need buy …	Negative	1	1	0
Google Play Store	196b00b2-4d7d-45ed-8b5b-9bf891b28e85	I am a new registered user. The last step is for the bank to call me and provide me with the verification code. I give it to them, they always say it's incorrect. What is the solution?	Ebrahim Arka	##########			0	ar	us		1	ar	new register user last step bank call provide verification code give always say incorrect solution	Negative	0	1	0
Google Play Store	f2053683-b64c-45db-9559-4633fb131fbd	There is a problem with bill payment. I encounter an error when trying to make the payment, but then I receive a message saying it has been paid. Please fix this issue. Thank you. Update after over a year from the date of review: The problem still exists and unfortunately has not been resolved.	RPD91	##########			51	ar	us		3	ar	problem bill payment encounter error try make payment receive message say pay please fix issue thank update year date review problem still exist unfortunately resolve	Negative	0	1	0
Google Play Store	3357eaf0-8521-44ba-b8f3-d34a1cedba3d	Why is there no Arabic?	Sara Alurabi	##########			0	ar	us		1	ar	arabic	Negative	1	0	0
Google Play Store	fbffb03b-8bbb-485e-87fa-70b21ab10697	The application is excellent for transfers, but honestly, it is very very bad at opening the application and there is a delay in opening it. Other banking applications are very good, no comments. Please solve this problem. Thank you.	jiad999 عمر جماعي	##########			0	ar	us		1	ar	application excellent transfer honestly bad open application delay open bank applications good comment please solve problem thank	Negative	1	1	1
Google Play Store	2814caef-fe49-407e-8332-b6725355589a	Needs improvement	فتى حزين	##########			1	ar	us		3	ar	need improvement	Neutral	1	0	0
Google Play Store	63e83df4-80a5-4612-853b-9875fd5c3b6e	Error while trying to retrieve data, please try again (2)	mohammed albarqi	##########			0	ar	us		2	ar	error try retrieve data please try	Neutral	0	1	0
Google Play Store	7d96879c-59d5-4660-99b7-e06ac3487128	Excellent.	Amal Aldossri	##########			0	ar	us		5	ar	excellent	Positive	0	0	0
Google Play Store	d257a9a4-4219-4291-b10f-f2eeb52d3a78	Excellent program.	عيوش المطيري	##########			0	ar	us		5	ar	excellent program	Positive	0	0	0
Google Play Store	8e877afa-1e5c-4ebf-aa07-c4e1b8b4eaf6	Excellent	مظفر ممتاز	##########			0	ar	us		5	ar	excellent	Positive	0	0	0
Google Play Store	83be5290-a86e-418b-89be-8a15c8e0fd89	I'm tired.	معتز عدلى	##########			0	ar	us		5	ar	im tire	Negative	1	0	0
Google Play Store	9a005caa-c31e-49ea-8d34-157c82a17252	The problem is the delay in receiving the two-factor verification code to open the application.	احمد ابوعبدالله	##########			0	ar	us		2	ar	problem delay receive twofactor verification code open application	Negative	0	1	1
Google Play Store	08df9de0-3fa6-46b4-a8ac-a014a70cb185	Very very bad data entry, it's boring and bad. After finishing, when I try to login, it gives me a message saying the password or secret number is incorrect. I changed it and the same problem still exists.	متعب	##########			0	ar	us		1	ar	bad data entry bore bad finish try login give message say password secret number incorrect change problem still exist	Negative	1	1	0
Google Play Store	d1f26207-9819-4d9c-ad2b-f71c276feaf2	Very distinctive	فؤاد القبيسي	##########			0	ar	us		5	ar	distinctive	Positive	1	0	0
Google Play Store	064e5af5-ba4d-4d4e-b6bf-67ba274a3c0d	Excellent very very very much.	راجح محمد	##########			0	ar	us		5	ar	excellent much	Positive	0	0	0
Google Play Store	365239dd-2dbc-4876-b973-aeabc174da27	A very excellent application, my only notes are on two problems. First, after the transfer, the option to share the transfer with the beneficiary does not respond. Therefore, I take pictures of the transfer details and send them via WhatsApp. I hope the problem is resolved. Additionally, there is an old problem regarding the Arabic language in the Jini program. It only works in English, and whene…	Lion's heart	##########			24	ar	us		5	ar	excellent application note two problems first transfer option share transfer beneficiary respond therefore take picture transfer detail send via whatsapp hope problem resolve additionally old problem regard arabic language jini program work english whenever choose arabic change hope update resolve issue thank	Negative	1	1	0
Google Play Store	f80d5332-a5c5-4852-8abb-c6e185853213	It doesn't work.	Rayan Alharbi	##########			0	ar	us		1	ar	doesnt work	Negative	0	1	0
Google Play Store	9db9ab18-1b4d-43fd-894b-93f60130a8ff	Problems with login, it does not respond to the password even after updating the password.	احمد هجلس	##########			3	ar	us		2	ar	problems login respond password even update password	Negative	0	1	0
Google Play Store	2192f804-5c52-4286-a89a-817c0af57758	There is a problem with the application. If you enter the password, it tells you that the number is incorrect or that you need to update your information. I just updated my information. However, the application is not working properly. Please solve the problem.	Ali Ali	##########			21	ar	us		1	ar	problem application enter password tell number incorrect need update information update information however application work properly please solve problem	Negative	0	1	0
Google Play Store	ce18cf32-207b-4bbd-8cec-49bb19025476	A recurring technical problem is the inability to access the application due to running the application on another device, even though the application only works on one device.	Bader Saad	##########			1	ar	us		1	ar	recur technical problem inability access application due run application another device even though application work one device	Negative	0	1	0
Google Play Store	1ed9d8bd-c2a7-4823-ae05-fab052ad85f2	Unfortunately, the application is often giving an incorrect password message or an incorrect username message, even though you are sure that you entered them correctly. Additionally, the application becomes slow and it is difficult to open it at times.	adnan hashim	##########			0	ar	us		1	ar	unfortunately application often give incorrect password message incorrect username message even though sure enter correctly additionally application become slow difficult open time	Negative	1	1	1
Google Play Store	52872d0d-5c7b-4d2a-bcdb-31a9d41a7dfb	Fail / Failure	احمد الزهراني	##########			0	ar	us		1	ar	fail failure	Negative	0	1	0
Google Play Store	078a962d-e80f-4263-8e0c-b3a8377d8c8c	Excellent, greetings to you. Previously, it used to save the username and enter the password and open easily and smoothly. But today, we have to enter the username first and then the password, and this method is tiring for the elderly. I hope the previous system is brought back.	ع و 5885 ن 58855885	2022-08-07 02:15:00			1	ar	us		5	ar	excellent greetings previously use save username enter password open easily smoothly today enter username first password method tire elderly hope previous system bring back	Positive	1	1	0
Google Play Store	7eb306ec-2059-4cd1-bb69-9506eb136151	No comment.	Mahrib Jafariy	2022-08-06 07:31:00			0	ar	us		2	ar	comment	Neutral	0	1	0
Google Play Store	fb3ec5ce-ce97-4826-97f3-90fc31772a99	It has been two weeks since God has not entered and May Allah help us.	عامر العنزي	##########			0	ar	us		1	ar	two weeks since god enter may allah help us	Negative	1	0	0
Google Play Store	862f597d-282a-49d8-a05a-a8600d0c8bb3	Very beautiful	عيدان الزهراني	##########			0	ar	us		1	ar	beautiful	Positive	0	0	0
Google Play Store	f90880a6-c21a-4946-be94-843a05da474b	The application is bad after the update. It doesn't open, whether it's the quick mode or the registration. I hope you can find a solution to this problem.	علي هندي	##########			1	ar	us		1	ar	application bad update doesnt open whether quick mode registration hope find solution problem	Negative	1	1	0
Google Play Store	7f071445-a7b3-43c5-9cf3-b2eddab10b14	Very excellent, may God bless you. I thank you for these amazing ideas, it's very easy and simple at the end. However, sometimes the application hangs, I don't know what the exact problem is, but please fix it.	وديع الشيخ	##########			1	ar	us		5	ar	excellent may god bless thank amaze ideas easy simple end however sometimes application hang dont know exact problem please fix	Positive	1	1	1
Google Play Store	e9a326a1-2821-4421-b859-2679c72cd626	Very excellent, a wonderful application.	حسن الزهراني	2022-08-01 00:58:00			0	ar	us		5	ar	excellent wonderful application	Positive	0	0	0
Google Play Store	87362ded-8187-4698-8a04-cedb4cea0acf	good	hn d	##########			0	ar	us		5	ar	good	Positive	0	0	0
Google Play Store	14a227d5-3656-42fd-a935-3e59a3470066	The application used to be excellent, but recently it has become extremely slow, to the point that when you log into your account, the password does not arrive for at least half an hour, and often it does not arrive at all. I am considering transferring my account from this bank to another bank with better services.	Assy Arry	##########			0	ar	us		1	ar	application use excellent recently become extremely slow point log account password arrive least half hour often arrive consider transfer account bank another bank good service	Negative	1	1	1
Google Play Store	b9e6b3e7-4eda-4a50-86a3-c021ca219b1f	The application has become the worst I have, after it used to be the best application. It now delays in sending the password to your mobile, and sometimes it doesn't even arrive. And if you enter it, it tells you that the password is incorrect. It has been causing stress lately, even though we have transfers for customers, it embarrasses you among them because of the delay. I hope the application…	majid bin yaqoub	##########			2	ar	us		1	ar	application become bad use best application delay send password mobile sometimes doesnt even arrive enter tell password incorrect cause stress lately even though transfer customers embarrass among delay hope application return good note doesnt deserve even one star comment less	Negative	1	1	1
Google Play Store	b9491275-a39d-4995-8bce-a8303042264e	After the latest update, it became very bad.	ahmadkors	##########			2	ar	us		1	ar	late update become bad	Negative	1	0	0
Google Play Store	ce0690a6-1fa3-4452-9f77-703b61b3906a	One of the worst applications I have encountered is some banks' applications, which can only be transferred to after several attempts. Sometimes I had to withdraw cash from the ATM because it would not transfer. I contacted the bank's technical support more than once, but there was no response. Additionally, there is a lack of services within the application, such as the absence of the simple ser…	sa الدبلوماسي	##########			7	ar	us		1	ar	one bad applications encounter bank applications transfer several attempt sometimes withdraw cash atm would transfer contact bank technical support response additionally lack service within application absence simple service pdf	Negative	1	1	0
Google Play Store	6c664f16-1211-4a52-9eed-d7fe0b10f68a	There is a significant development in the application. We hope to add standing orders through the French mobile application. Also, making Visa payment available for someone else. Thank you, BSF.	dreemdreem dreem	##########	نشكرك على اعادة تقييم فرنسي موبايل ويسعدنا خدمتكم	##########	2	ar	us		5	ar	significant development application hope add stand order french mobile application also make visa payment available someone else thank bsf	Positive	0	1	0
Google Play Store	083a9102-21ba-497a-9896-6a29a50876c5	Very very very very bad program	Abu Mhmmed	##########			0	ar	us		1	ar	bad program	Negative	1	0	0
Google Play Store	81ab137e-12c3-46f0-9c98-451c1a7e917c	Bad application, bad and slow, and it won't open. I hope they learn from the Alahli Bank application, which is fast and has all the services in the app.	Muaid Ali	##########			0	ar	us		1	ar	bad application bad slow wont open hope learn alahli bank application fast service app	Negative	1	0	1
Google Play Store	92bf259a-c362-47df-978f-0a8a819ecb81	"Protected more."	Bial Muhammad	##########			0	ar	us		5	ar	protect	Neutral	0	0	0
Google Play Store	09f62d02-82c0-4c32-8643-3fe661a4d3fa	The application is the worst. The delay in sending the password when logging in has occurred due to multiple devices being logged in. Please clear the devices and log in again.	حسن زرعي	##########			1	ar	us		1	ar	application bad delay send password log occur due multiple devices log please clear devices log	Negative	1	0	1
Google Play Store	f840f03a-49b0-4418-aa06-0276e6eb0677	The application has a problem of freezing when opening credit cards and it hangs for a while then automatically exits the program and closes, while the phone remains frozen and tense until a message appears to wait or close the application. I don't know what the problem is, especially with credit cards.	YouTube The World	##########			21	ar	us		3	ar	application problem freeze open credit card hang automatically exit program close phone remain freeze tense message appear wait close application dont know problem especially credit card	Negative	0	1	1
Google Play Store	f821e13f-74a9-4058-84af-d09f8729c4c9	Excellent and very sophisticated service. Thank you very much for your gratitude and appreciation.	خالد عسيري	##########			0	ar	us		5	ar	excellent sophisticate service thank much gratitude appreciation	Positive	0	0	0
Google Play Store	9422997c-2306-46ae-945a-407e23494940	I tried a banking application that I've never seen in my life. It gives you a block without reason and gives you a complete block because you entered the correct information.	ELECTRO WIRE	##########			1	ar	us		1	ar	try bank application ive never see life give block without reason give complete block enter correct information	Negative	0	1	0
Google Play Store	3c6884e4-63ec-45e8-bd36-f0569d515c2d	How do I open an account from the application?	ابـوفيـصـل المرقبـي ”ابوفيصل“	##########			0	ar	us		5	ar	open account application	Neutral	0	1	0
Google Play Store	78b34b72-9a8b-4f73-b801-24c663f0e895	The application is not working.	مستخدم Google	##########			0	ar	us		1	ar	application work	Negative	0	1	0
Google Play Store	b9342dab-3f19-4610-ad76-21c5bf6aafaa	Very unsuccessful	امل العنزي	##########			0	ar	us		1	ar	unsuccessful	Negative	1	0	0
Google Play Store	ffc83a72-04a2-4881-9208-f018f403ee43	When logging in, a message appears stating that more than one device has been registered. If you want to register this device, you need to delete one of the devices from the settings page. Note that I only use one device, and where is this settings page that you mentioned... Please help us.	بهاء الدين	##########			23	ar	us		3	ar	log message appear state one device register want register device need delete one devices settings page note use one device settings page mention please help us	Neutral	0	1	0
Google Play Store	1c0af12f-ad4c-4a69-b612-c2fdd89b6500	Failed, he can't log in.	Mustafa	##########			0	ar	us		1	ar	fail cant log	Negative	0	1	0
Google Play Store	fd09e7db-6519-4d43-9189-0e3ac5e641e6	The programs do not explode and the activation does not come through the connection.	Habeeb Abdullha	2022-06-07 07:50:00			0	ar	us		1	ar	program explode activation come connection	Neutral	0	1	0
Google Play Store	474b909b-9f2d-4f7a-b1cc-39724c957d5d	Good to some extent.	محمد غزواني	##########			0	ar	us		5	ar	good extent	Positive	0	0	0
Google Play Store	36a76a6f-cb5a-42a7-ad18-f8f0371feebe	Excellent	Omar Alomari	2022-06-04 02:41:00			0	ar	us		5	ar	excellent	Positive	0	0	0
Google Play Store	ac9e724f-1520-4542-822c-13caaa3e34e4	Very bad, with many breakdowns.	Meshal Abuali	2022-06-04 00:07:00			0	ar	us		1	ar	bad many breakdowns	Negative	1	0	0
Google Play Store	3d81ccbe-a0fa-498f-9d60-46acd142837d	The appearance of the message (You have exceeded the allowed limit for several activated devices). Please provide a quick solution. Thank you.	Ali bin Laswad	##########			1	ar	us		1	ar	appearance message exceed allow limit several activate devices please provide quick solution thank	Negative	0	1	0
Google Play Store	c0b7ae49-108d-4719-b295-72c8bd5d648e	They are asking me for the PIN number of the card and the card number.	صابر السريف	##########			0	ar	us		1	ar	ask pin number card card number	Neutral	0	1	0
Google Play Store	65ad86fb-4978-4a35-a529-6eb84738b8d8	Excellent	mohammed madkhali	2022-06-01 00:59:00			0	ar	us		5	ar	excellent	Positive	0	0	0
Google Play Store	b697eb47-72ce-43c3-8738-376076c0fb49	"If I enter the correct password, it tells me it's wrong. I have exceeded the login limit and when I try to reset the password, it asks me to change the username. But I want to change the password. I hope you can solve this problem."	حسام الحفظي	##########			1	ar	us		3	ar	enter correct password tell wrong exceed login limit try reset password ask change username want change password hope solve problem	Negative	0	1	0
Google Play Store	c64ac793-678e-4d50-b041-e707a17d7f5f	I have not seen anything easier than this application, and working with it is truly without compliments or advertising. Greetings to you and to those who have done it (especially IT people).	Khalifa As-saayed	##########			1	ar	us		5	ar	see anything easy application work truly without compliment advertise greetings do especially people	Positive	1	1	0
Google Play Store	f9c94322-1fe9-4a1e-80b8-836950915b17	Thank you.	abo abaas	##########			0	ar	us		5	ar	thank	Positive	0	0	0
Google Play Store	06bc4924-f373-493b-adea-faac45478ece	What doesn't open for me after the latest update?	A KSA	##########			1	ar	us		1	ar	doesnt open late update	Neutral	0	1	0
Google Play Store	43351a34-8581-4ee0-b3e8-c848a93486e4	The application is very bad and there are always problems with logging in. I hope you can find a solution.	ام حسن بوحسن	##########			3	ar	us		1	ar	application bad always problems log hope find solution	Negative	1	1	0
Google Play Store	fea1b1a9-4c61-44b9-805c-3739ed29c5a8	I have tried multiple times to access my account, but it doesn't let me in. It keeps saying the password is incorrect even though it is correct. The bank has no benefits and is very bad.	IRM 89	##########			7	ar	us		1	ar	try multiple time access account doesnt let keep say password incorrect even though correct bank benefit bad	Negative	1	1	0
Google Play Store	d3bf1d37-b366-4f9b-91fd-d2cdc027806d	I face problems with logging in since the new update, the application is bad.	saleh Ss	##########			2	ar	us		1	ar	face problems log since new update application bad	Negative	1	1	0
Google Play Store	34cb04db-27c9-4749-9d93-a3d270b5ea2f	There is a problem with the Samsung Note mobile phone, the software is not working correctly.	I A	##########			2	ar	us		1	ar	problem samsung note mobile phone software work correctly	Negative	0	1	0
Google Play Store	4bba8ca2-5b44-40ea-bbe5-16aa6b773a3f	Bad application does not work properly	Madof	##########			2	ar	us		1	ar	bad application work properly	Negative	1	1	0
Google Play Store	0857a5cf-3008-4f19-ae38-1bec6c2fba6a	The application has become better than before.	Mohamad alsayed	##########			0	ar	us		3	ar	application become good	Positive	1	0	0
Google Play Store	ca2fb33a-7c14-4569-834e-6fadabe1a42d	The worst bank ever and doesn't deserve even a single star. Every time I try to log in, it keeps transferring me and I don't want to open the application. They send me another mobile number the next day, but it takes three minutes for the number to arrive. The number they send is the worst.	حوراني معقدهم 2020 للصوتيات والمرئيات	2022-05-09 06:43:00			1	ar	us		1	ar	bad bank ever doesnt deserve even single star every time try log keep transfer dont want open application send another mobile number next day take three minutes number arrive number send bad	Negative	1	1	0
Google Play Store	f5310b74-5380-498b-a63e-d93a40149411	The program is called "Sumardali".	تركي المطيري	##########			0	ar	us		5	ar	program call sumardali	Neutral	0	1	0
Google Play Store	f887a738-bdd1-44fa-b3e1-1198a7b30c50	The application does not open.	الجنة مبتغاي	##########			1	ar	us		1	ar	application open	Neutral	0	1	0
Google Play Store	e4b555f6-0e23-4c97-959d-781874607846	The program doesn't open at all. Only the word "Generation" appears on the screen.	bashaier alsubaie	##########			0	ar	us		1	ar	program doesnt open word generation appear screen	Negative	0	1	0
Google Play Store	62031f02-0731-4b37-9998-865461984065	Excellent	مدثر احمد	##########			0	ar	us		5	ar	excellent	Positive	0	0	0
Google Play Store	f4a5411b-6e4a-4083-b3fe-d3694d5cbd50	The application was excellent, but suddenly with the latest update, it became the opposite completely. When logging in, a message appears stating that multiple devices have been registered, although I only use this application on one device. Please resolve the issue.	Fw. Alqattan	2022-05-02 06:18:00			53	ar	us		1	ar	application excellent suddenly late update become opposite completely log message appear state multiple devices register although use application one device please resolve issue	Negative	1	1	0
Google Play Store	d9aa66b8-42f9-4247-98e0-e8572fac2bb1	The application is not working at all, unfortunately. Please solve this problem.	أحمد محمد إبراهيم ودالقاضي	##########			5	ar	us		1	ar	application work unfortunately please solve problem	Negative	0	1	0
Google Play Store	c463b3a5-1db9-46d3-9a5a-51b01f40eb28	It is not appropriate now.	أبو سكر	##########			1	ar	us		1	ar	appropriate	Negative	1	0	0
Google Play Store	083e28b3-6837-43d5-81be-51e4873d390e	Extremely bad and not worth a quarter of a star because since yesterday, I have been trying to access my account, and the situation has been frustrating.	Sami Osman	##########			1	ar	us		1	ar	extremely bad worth quarter star since yesterday try access account situation frustrate	Negative	1	0	0
Google Play Store	5fbc7a51-46c5-4dd1-ab94-221503b8d06c	Before the latest update, the application was working very well and smoothly on my Android 8.1 device. However, after being forced to update the application, it no longer works at all, and when I open it, the screen flips horizontally.	Ahmed	##########			0	ar	us		1	ar	late update application work well smoothly android device however force update application long work open screen flip horizontally	Negative	0	1	0
Google Play Store	1528c3c7-3baf-406d-aeeb-47ab2ed53c44	The application is not responsive, very slow in the process stages, then it does not respond, does not accept the quick login number, and does not accept resetting it again. It does not accept the username and password and asks me to register again, then it does not respond. It tells me that I am registered on more than one phone, but I only have this phone. Then it says an error occurred and the…	مستر أحمد طه فيزياء	##########			5	ar	us		1	ar	application responsive slow process stag respond accept quick login number accept reset accept username password ask register respond tell register one phone phone say error occur operation fail respond	Negative	0	1	1
Google Play Store	a734d735-0bfb-4f02-a8be-519e315f29be	After the latest update, the program no longer opens. Every time I try to open it, it says that I have exceeded the allowed number of devices, even though I have only tried from one device.	Majeed Ajlouni	##########			0	ar	us		2	ar	late update program long open every time try open say exceed allow number devices even though try one device	Negative	0	1	0
Google Play Store	28257233-53b6-443f-aa06-6f11ad18bfdb	The application does not work on the large Galaxy Fold screen after the update.	mohammed alamer	##########			0	ar	us		1	ar	application work large galaxy fold screen update	Negative	0	1	0
Google Play Store	7f65eb0a-a298-4f5b-aff6-b886f1a2f57d	The latest update is bad and prevents me from logging in, claiming that I have exceeded the allowed limit of activated devices. Stop us from this rubbish and bring back the application as it was before.	Abdulrahman ALOTAIBI	##########			1	ar	us		1	ar	late update bad prevent log claim exceed allow limit activate devices stop us rubbish bring back application	Negative	1	1	0
Google Play Store	26fc086b-e095-4f12-ae70-5ba9e6b88ebe	I have been trying for a while to log in, but it tells me that I have exceeded the allowed number of devices. What is this application? :( .. I'm tired of deleting it and reinstalling it. There doesn't seem to be a solution.	Hawra Mousa	##########			1	ar	us		1	ar	try log tell exceed allow number devices application im tire delete reinstall doesnt seem solution	Negative	1	1	0
Google Play Store	518104ca-dad2-4386-8bee-980cda0671d0	I changed the method of logging into my account from fingerprint to SMS. Then, I set up the fingerprint again and enabled quick login, and it worked for me. Those who are facing login issues should try it.	Rasha M	##########			0	ar	us		4	ar	change method log account fingerprint sms set fingerprint enable quick login work face login issue try	Neutral	0	1	0
Google Play Store	1d52cbe1-14cf-4958-9e85-d0d01c09d61f	After the latest update, a message appears that the maximum limit for devices has been exceeded...etc. It should be noted that the French Mobile website is also not working, and there is no way to review and delete the registered devices.	zeyad salem	##########			42	ar	us		1	ar	late update message appear maximum limit devices exceededetc note french mobile website also work way review delete register devices	Negative	0	1	0
Google Play Store	fef81791-3db0-4fbf-a359-b9a7b70f7608	The application gives me a warning that there has been a login from multiple devices, even though I only have one device. What should I do?	Basheer Issa	##########			4	ar	us		5	ar	application give warn login multiple devices even though one device	Neutral	0	1	0
Google Play Store	86a965f5-1fe5-4613-9e0d-b2fbefdff6a0	The best banking application	يوميات عريب و بدريه Saad	##########			0	ar	us		5	ar	best bank application	Positive	0	0	0
Google Play Store	a599fbb4-2390-43b4-a42c-41cdffc76c89	The app update was the worst. It was working perfectly before the update and it was supposed to improve with the update, not the other way around.	محمد عبدالله	##########			1	ar	us		1	ar	app update bad work perfectly update suppose improve update way around	Negative	1	1	0
Google Play Store	b93dbaae-b767-40e6-8624-39e36a4b7886	The new update is very bad and very, very slow. The slow gear movement design is annoying. I've been trying for an hour to pay bills and make transfers.	Maa Suu	##########			2	ar	us		1	ar	new update bad slow slow gear movement design annoy ive try hour pay bill make transfer	Negative	1	0	1
Google Play Store	64da8000-121b-46d3-b4aa-a2c1ae01f2ae	The application is very bad.	waeel jeddah	##########			1	ar	us		1	ar	application bad	Negative	1	0	0
Google Play Store	f52af477-e977-4d48-a78e-b5dc120bb4e4	Unfortunately, the program suddenly stopped working. The startup screen appears for two seconds and then the application closes.	Zaki A	##########			1	ar	us		1	ar	unfortunately program suddenly stop work startup screen appear two second application close	Negative	0	1	0
Google Play Store	09aaae0f-6a57-41b1-b677-fc0b5a9488cb	Very, very bad	حسن بن شموس الهذلي	##########			1	ar	us		1	ar	bad	Negative	1	0	0
Google Play Store	15ea094e-42fc-44af-86f0-acae25d014f5	I swear, this program is exhausting and it always says there is a technical error, it never says that the data was entered incorrectly even though I am sure of everything. I have contacted the bank more than twenty times and it's useless.	الشرقاوي الشرقاوي	##########			1	ar	us		1	ar	swear program exhaust always say technical error never say data enter incorrectly even though sure everything contact bank twenty time useless	Negative	1	1	0
Google Play Store	b6f48a18-5128-4824-8507-89885f846f5a	Very bad, it doesn't open and it freezes.	قناة الرياضيات	##########			1	ar	us		1	ar	bad doesnt open freeze	Negative	1	1	1
Google Play Store	c74980b9-97d2-44ad-b3c2-b81bb7111743	Excellent application and its services are quick.	عبدالكريم حزام	##########			0	ar	us		5	ar	excellent application service quick	Positive	0	0	0
Google Play Store	8ef8be2b-0e44-480f-a0ec-143a5f42c469	Okay	ابوالوفاء اروح تفداك	##########			0	ar	us		5	ar	okay	Positive	0	0	0
Google Play Store	5c2f1863-0ea5-4da4-9b6b-5200a5692499	Unfortunately, after the latest update, it has become very bad, slow, and does not allow exiting the application.	حسين عقيل	##########			1	ar	us		1	ar	unfortunately late update become bad slow allow exit application	Negative	1	1	1
Google Play Store	5a8289d5-38f2-4abd-b1aa-40834c3fbee7	the worstFrench mobile application that does not meet the standards of being an application for a store, instead of a bank like Saudi French Bank.	almansy	##########			0	ar	us		1	ar	worstfrench mobile application meet standards application store instead bank like saudi french bank	Negative	1	0	0
Google Play Store	1baee51d-6cee-4d78-a115-838024ffeb8c	The application is not responding to login.	NA Jj	##########			0	ar	us		1	ar	application respond login	Negative	0	1	0
Google Play Store	087aa555-0633-449b-97b9-f264440df9cd	The application has a problem, it does not work. It says that more than one device has been registered, but I have only downloaded it on one device. I wish they hadn't done that. Please solve the problem.	BANDAR ALMEHMADI	##########			0	ar	us		1	ar	application problem work say one device register download one device wish hadnt do please solve problem	Negative	0	1	0
Google Play Store	50baa2d8-779a-40ef-8b74-45cb958d9a1c	I wish I hadn't spoken first. This failure should not have entered and said more than one device, I don't know what to do. May God be sufficient for me and the best representative to you, you are the worst.	أبو إلياس s	##########			0	ar	us		1	ar	wish hadnt speak first failure enter say one device dont know may god sufficient best representative bad	Negative	1	1	0
Google Play Store	347b0e17-0761-4634-9dfa-d671cbe22acb	No comment.	ahmed atwi	##########			0	ar	us		1	ar	comment	Neutral	0	1	0
Google Play Store	9f7628c4-40e3-4843-9ca9-d89ad6de5aa1	Beautiful	Sattam Saleh	##########			0	ar	us		4	ar	beautiful	Positive	0	0	0
Google Play Store	599f4030-5679-4633-9df8-13543f2cef52	I hope to fix the problem with devices after the update, as it shows that you are logged in on more than one device, while I am logged in from one device.	مهدي حبيب البوخضر	##########			0	ar	us		1	ar	hope fix problem devices update show log one device log one device	Neutral	0	1	0
Google Play Store	21a54004-9389-4b0b-a48e-d2a6219150fc	"The application is not working, it is frozen and requesting access to photos, media, and also requiring permission to manage phone calls. Please note the privacy settings."	أبو وسام moshfer	##########			0	ar	us		1	ar	application work freeze request access photos media also require permission manage phone call please note privacy settings	Negative	0	1	1
Google Play Store	3d3288ae-7fde-4f40-aed1-fac9c97c178c	Excellent program	محمد الراجح	##########			0	ar	us		5	ar	excellent program	Positive	0	0	0
Google Play Store	bc88e86e-bf3e-4e4c-b708-fd396d84ed97	Comfortable...	صالح العتيبي	##########			0	ar	us		4	ar	comfortable	Neutral	0	0	0
Google Play Store	e82282dc-93b4-4569-a367-4c8387e456f3	The application is distinctive, its services are clear and easy.	عبدالرحمن الذوادي	##########			0	ar	us		5	ar	application distinctive service clear easy	Positive	0	0	0
Google Play Store	3f1ad42e-d14b-4875-a44b-f398ac8741b1	The worst bank in the mobile application doesn't need to be developed, it needs a complete change.	Ibrahim	##########			0	ar	us		1	ar	bad bank mobile application doesnt need develop need complete change	Negative	1	0	0
Google Play Store	5a1f3ac9-8617-4d97-9568-298603380ce1	The first application was excellent. But this update is bad. It shows "loading" but it doesn't download.	tariq alharbi	##########			4	ar	us		1	ar	first application excellent update bad show load doesnt download	Negative	1	1	0
Google Play Store	e8964f72-f8d7-446d-9034-94ab887aeb2a	The update is bad.	hamar gamar	##########			0	ar	us		1	ar	update bad	Negative	1	0	0
Google Play Store	ec43661e-47ea-46a5-b2f9-bebb96139bae	Good.	Hamed Monem	##########			0	ar	us		3	ar	good	Positive	0	0	0
Google Play Store	c3182f54-b109-4020-bcdc-ba346ac81013	The sincere promise.	عبد الواحد البلادي	##########			0	ar	us		5	ar	sincere promise	Positive	0	0	0
Google Play Store	bf43a1fa-75aa-4fbb-9d0d-75f1a6b68405	After updating the application, it no longer works and I cannot even log in. The update is very bad.	F9Lh 2002 - فصلة 2002	##########			2	ar	us		1	ar	update application long work even log update bad	Negative	1	1	0
Google Play Store	886df2ad-9c7f-4b6a-aaae-ac770a2559c1	If it doesn't work for him after the update, he can switch the language to English, login to his account, log out, and switch the language back to Arabic. It should work for him.	ناصف الحسني	##########			0	ar	us		5	ar	doesnt work update switch language english login account log switch language back arabic work	Neutral	0	1	0
Google Play Store	7b8904df-ee5d-4eb0-876c-28c724975961	The new update does not load or update, and there is a problem with it. I have been trying for two days.	Fat Al-ans	##########			0	ar	us		1	ar	new update load update problem try two days	Negative	0	1	0
Google Play Store	aede0170-e04e-476a-9f14-ff90ede5c977	Problem with login.	أحمد البراهيم	##########			0	ar	us		1	ar	problem login	Negative	0	1	0
Google Play Store	2d3be1a0-b331-4f20-a11c-bd269314ac41	The application is not working.	Hassan Adam	##########			0	ar	us		1	ar	application work	Negative	0	1	0
Google Play Store	a645d9f9-fd0c-42fa-860c-3081f5dcb8b9	Beautiful update	musa fara	##########			0	ar	us		5	ar	beautiful update	Positive	1	0	0
Google Play Store	05e5fbe1-db03-4d4e-a674-0334aa2bc7f5	The update was done, but unfortunately the application did not open. Let's stick with the old one, it was excellent.	ENGNEER AHMED	##########			2	ar	us		1	ar	update do unfortunately application open let stick old one excellent	Negative	1	1	0
Google Play Store	7da7a1d7-b199-4d86-a4df-df905cb85b37	Very bad, it doesn't work.	طارق TARIQ	##########			0	ar	us		1	ar	bad doesnt work	Negative	1	1	0
Google Play Store	e9480515-9a67-4bf5-b05c-42c23895e498	The application has a serious problem and does not work. It says that it has been registered on more than one device, but I have only downloaded it on one device. The problem appeared with the latest update of the application, and the developer is not convinced that there is a problem. I have filed multiple reports, but it was of no use. Check the app's operations, it is not working for anyone.	أحمد عبدالله	##########			71	ar	us		1	ar	application serious problem work say register one device download one device problem appear late update application developer convince problem file multiple report use check apps operations work anyone	Negative	0	1	0
Google Play Store	bc89c276-288e-49fd-9b4b-fae1553094ce	I have tried several times and it didn't work for me. I don't know what the problem is.	Waleed 123	##########			0	ar	us		1	ar	try several time didnt work dont know problem	Negative	0	1	0
Google Play Store	7d95859d-21a9-4347-b13d-58c78f19cc74	SEVERELY, VERY, VERY, VERY, VERY UNTIL IT REACHES THE END	Naif Naif	##########			0	ar	us		5	ar	severely reach end	Neutral	1	0	0
Google Play Store	a1e21014-b662-4220-baad-ff257443e195	Very good	رفعت صبحي	##########			0	ar	us		4	ar	good	Positive	0	0	0
Google Play Store	c57c546c-078a-4013-bc16-c79c6a88e104	Bad update won't open.	فيصل الفيصل	##########			0	ar	us		1	ar	bad update wont open	Negative	1	1	0
Google Play Store	1f74025c-5106-4a7c-b1c2-329019f1b77d	After the update, it became like crap. You can't access your account. If the problem continues until tomorrow, I will cancel my account with you.	Hussain Jubran	##########			0	ar	us		1	ar	update become like crap cant access account problem continue tomorrow cancel account	Negative	0	1	0
Google Play Store	f95b4949-6e8c-406c-8273-06fe2762d9d5	Bad	Batul Fatani	##########			0	ar	us		1	ar	bad	Neutral	1	0	0
Google Play Store	1041a41b-f083-41e9-8e31-639be0819fa0	The application has been deleted and reinstalled again, and it is working perfectly.	ايمن الرحمون	##########			1	ar	us		4	ar	application delete reinstall work perfectly	Positive	0	1	0
Google Play Store	bba92a43-0fa6-45b9-b6af-40f019e18672	The update doesn't open, why?	علاء اعليوي	##########			0	ar	us		1	ar	update doesnt open	Negative	0	1	0
Google Play Store	2e46ffdb-9e92-45d9-a051-36a79a5375bf	Bad application, I'm trying to log into the application and I couldn't.	MM عسيري	##########			0	ar	us		1	ar	bad application im try log application couldnt	Negative	1	1	0
Google Play Store	f62a5137-6a23-44a8-a8aa-7565914cd162	Unfortunately, after the update, it no longer opens smoothly like before. It keeps saying that the application has stopped and I have already updated it. Please fix the program, you ruined it.... 💔	أنيسة الصواف	##########			0	ar	us		1	ar	unfortunately update long open smoothly like keep say application stop already update please fix program ruin	Negative	0	1	0
Google Play Store	807796ca-99e9-4ec3-937f-b308bb9d34b0	A very bad and unsuccessful application that does not meet the standards of the bank's customer service.	محمد عبدالرحمن	##########			0	ar	us		1	ar	bad unsuccessful application meet standards bank customer service	Negative	1	0	0
Google Play Store	dc64f8db-ca01-4b22-afd2-58c3cf341ecd	Excellent	مكاشة خليل محسن٧٤٥٢	##########			0	ar	us		5	ar	excellent	Positive	0	0	0
Google Play Store	c5bc91a5-93bf-4b35-96d8-19e91c599ccb	After the update, it does not open at all. When you enter, it takes you to the update again, even though it has been updated. Please solve the problem as soon as possible so that we do not lose our trust in you.	شايب مراهق	##########			2	ar	us		1	ar	update open enter take update even though update please solve problem soon possible lose trust	Negative	0	1	0
Google Play Store	2f47224d-65fc-4e97-936b-962c30a87999	Error message	ابو شامان الشامان	##########			0	ar	us		1	ar	error message	Negative	0	1	0
Google Play Store	a7616ef3-7ead-42b1-af0d-7a81d0ac3b22	Your app doesn't work properly, fix it.	سعدالشمري	##########			0	ar	us		1	ar	app doesnt work properly fix	Negative	0	1	0
Google Play Store	7b23eaa2-a7a2-4eb1-9257-b8d1c38e2290	I have a problem logging into the application since yesterday, even though I downloaded the latest update for it, it never opens and keeps prompting to download the latest version.	Wagdy Galal	##########			5	ar	us		1	ar	problem log application since yesterday even though download late update never open keep prompt download late version	Negative	0	1	0
Google Play Store	d7044fd2-d7a9-4e6c-98d9-b0c7ec807c31	The latest update has a malfunction that prevents accessing the application.	Ahmed Shouk q.6 & B.M	##########			1	ar	us		1	ar	late update malfunction prevent access application	Negative	0	1	0
Google Play Store	33816e9c-51fc-4e8e-a39c-11efd2529534	Excellent very very	جعفر عباس الصالح بو موسى	##########			0	ar	us		5	ar	excellent	Positive	0	0	0
Google Play Store	e8724ecc-5812-4800-bd04-6f0d75fefa04	The new update is not working, as soon as I log into the application, it asks for the update to the new version again, and the star is only for posting the comment, nothing more.	هتان	##########			0	ar	us		1	ar	new update work soon log application ask update new version star post comment nothing	Negative	0	1	0
Google Play Store	7797d8d6-0917-408c-b7bd-0fc88328e64a	Honestly, the update is not new. Until now, I couldn't log into my account. Every time I enter the password, it gives me an error... and I don't know the reason for your update. Things were fine before.	Ehab Khair	##########			8	ar	us		5	ar	honestly update new couldnt log account every time enter password give error dont know reason update things fine	Negative	0	1	0
Google Play Store	527d41bf-9ea1-476a-8cfc-8e96371409e9	It no longer works after the update.	sami alharbi	##########			0	ar	us		1	ar	long work update	Negative	0	1	0
Google Play Store	1995da17-b5b2-499a-a6be-9f4e8f6d4062	The application is not working, please solve the problem quickly. O Allah, I am fasting. 😡	Awad Sager	##########			0	ar	us		1	ar	application work please solve problem quickly allah fast	Negative	0	1	1
Google Play Store	c19fcc5c-65e9-48ea-8256-95e265011e0c	Excellent	ابراهيم مسلم	##########			0	ar	us		5	ar	excellent	Positive	0	0	0
Google Play Store	f17d572d-9785-47b0-a37d-139094d9ed4a	Good	Sudan Ethiopa	##########			0	ar	us		5	ar	good	Positive	0	0	0
Google Play Store	0024e6ca-3be2-4865-b996-72463b2be3d1	I was unable to log in after the update.	sadstory mmm	##########			0	ar	us		1	ar	unable log update	Negative	0	1	0
Google Play Store	061c6146-a5dd-4908-915a-1558069e07eb	Zero	O Bawazir	##########			0	ar	us		1	ar	zero	Neutral	1	0	0
Google Play Store	3a15c1f6-4b88-427a-997c-2f590cba8470	nice	Flower Alflower	##########			0	ar	us		5	ar	nice	Positive	0	0	0
Google Play Store	b3073be0-d6f0-4c90-bad6-39950b4ab8da	I am facing an issue with logging in. I hope it gets fixed quickly.	MAH _	##########			0	ar	us		1	ar	face issue log hope get fix quickly	Negative	0	1	0
Google Play Store	d804bdde-0b8f-413b-b0d8-8d9f5c0c3582	The commentator is requesting the latest version, which is the latest release.	احمد قمش	##########			0	ar	us		1	ar	commentator request late version late release	Neutral	0	1	0
Google Play Store	aa5cdf02-330a-4772-83a8-2c1b0c498faf	Zafat, zafat, zafat.	محمد علا	##########			0	ar	us		1	ar	zafat zafat zafat	Neutral	0	0	0
Google Play Store	627ba8dd-b14f-4d45-b619-fdd027922822	Excellent	مبروك المزروعي	##########			0	ar	us		5	ar	excellent	Positive	0	0	0
Google Play Store	5ca5b652-a186-43e7-bd14-2e53b262428e	It doesn't work for me, it says "Update" and I am updating.	Motivational quotes	##########			0	ar	us		2	ar	doesnt work say update update	Negative	0	1	0
Google Play Store	15aee05d-6d18-421a-a357-79424eaa781f	Very bad.	ابو محمد	##########			0	ar	us		1	ar	bad	Negative	1	0	0
Google Play Store	0ef38ce3-acb4-4b19-a82a-ae4f61c6ccd3	A very bad experience, and this is not strange for you, French bank. From bad to worse, the program doesn't work after the new update. This is unbelievable. Is this an official bank website? What is the situation with the administrators of the website? This is not just my opinion, look at the comments and make sure. Give me permission before I complain to the Monetary Authority about your failure…	أبو عبدالرحمن	##########			0	ar	us		1	ar	bad experience strange french bank bad bad program doesnt work new update unbelievable official bank website situation administrators website opinion look comment make sure give permission complain monetary authority failure bank protect right customer	Negative	1	1	0
Google Play Store	cbe115ed-cdd0-4d04-8370-704ba0abc7ad	Very bad, it doesn't open.	Motwakil Altayeb	##########			0	ar	us		1	ar	bad doesnt open	Negative	1	1	0
Google Play Store	28d2a9a0-dde1-4fa4-9e63-3b2ee15a87ec	The application is excellent.	Hani Sharaf	##########			0	ar	us		5	ar	application excellent	Positive	0	0	0
Google Play Store	d0587371-93d5-4a74-bf82-b353470efb28	Put an update like normal people, an app that ruins your mood.	شفراوي ابو عبدالله	##########			0	ar	us		1	ar	put update like normal people app ruin mood	Negative	1	0	0
Google Play Store	f58518bc-697e-46da-a331-d80c49825a71	The application is not working even though I updated the version and it still asks for an update???	Modar Shik	##########			1	ar	us		1	ar	application work even though update version still ask update	Negative	0	1	0
Google Play Store	83366633-0df3-47b3-b5cb-2f5e0fe91024	Easy and fast.	احمد الغامدي	##########			0	ar	us		5	ar	easy fast	Positive	0	0	0
Google Play Store	16306e47-526b-466a-9d61-6504ccde2c57	There is a problem with the application, please solve it quickly.	سعيد الحربي	##########			0	ar	us		1	ar	problem application please solve quickly	Negative	0	1	0
Google Play Store	1999eebc-885e-4336-9580-0b2533e170ba	It doesn't work.	بوعبدالله ال بريك	##########			0	ar	us		1	ar	doesnt work	Negative	0	1	0
Google Play Store	b1a95bf9-70cb-43cb-b102-c87f22999b2a	Abu Kal**	محمد الحارثي	##########			0	ar	us		2	ar	abu kal	Neutral	1	0	0
Google Play Store	58d47232-27a2-4116-86ca-18d5dc351ffc	the worstprogram ruined everything for us first. Every time we entered, it would say to download the update, and we downloaded the update and repeated the same question. The first program was better. And now we cannot log in like before, we cannot access the application after the update.	بدر احمد	##########			0	ar	us		1	ar	worstprogram ruin everything us first every time enter would say download update download update repeat question first program good log like access application update	Negative	1	1	0
Google Play Store	aa5067ea-e749-4fbd-8ade-9afc2e0d1c0a	Excellent	Mohammad Boraji	##########			0	ar	us		5	ar	excellent	Positive	0	0	0
Google Play Store	d939e99e-2f8d-4955-a56f-fad0454a3bf5	Very, very wonderful.	حسين مدخلي	##########			0	ar	us		5	ar	wonderful	Positive	0	0	0
Google Play Store	70aa2607-82a4-4b2e-8db0-bf9bca110702	The application has been updated and whenever I open it, it tells me to update and it does not enter, not even the application before its impressive and sufficient.	جواد البيك	##########			1	ar	us		3	ar	application update whenever open tell update enter even application impressive sufficient	Negative	0	1	0
Google Play Store	c7fb1a7b-665c-484f-839e-edda05ab4a22	Excellent	محمد الطنطي	##########			0	ar	us		5	ar	excellent	Positive	0	0	0
Google Play Store	7dc22b30-6120-4c20-9265-f23595f4981f	I am trying to log in, but everyone says there is a technical error.	Maher alomran	##########			1	ar	us		1	ar	try log everyone say technical error	Negative	0	1	0
Google Play Store	9abd9505-9aef-42a4-96fd-76c3410d0565	Beautiful.	عبدالله اليامي	##########			0	ar	us		1	ar	beautiful	Positive	0	0	0
Google Play Store	552086be-f0fe-4243-a2bc-936492198c41	Why doesn't the application work on the Galaxy Tab?? Strange.	ابو بشيت	##########			0	ar	us		1	ar	doesnt application work galaxy tab strange	Negative	1	1	0
Google Play Store	66808d2d-db0c-42f3-a43b-1d48145f302f	Unfortunately, the new update is very bad. I am unable to access the application.	تركي بن دحام	##########			0	ar	us		1	ar	unfortunately new update bad unable access application	Negative	1	1	0
Google Play Store	e9dd3d2e-5d95-4ef5-bf66-14bcdbc72edd	He needs a job to say that he has exceeded the allowed number of devices.	حسن يوسف	##########			0	ar	us		1	ar	need job say exceed allow number devices	Neutral	1	1	0
Google Play Store	fd102e34-0c45-499c-b6c3-929cd31ef105	When requesting information about my personal loans, it provides inaccurate data. The old version is better.	GMC 454	##########			0	ar	us		1	ar	request information personal loan provide inaccurate data old version good	Negative	1	1	0
Google Play Store	e8e6968a-fd6c-4e06-867e-a5010bacfa8a	The latest update is all problems ☹	bilal2019 Mok	##########			1	ar	us		1	ar	late update problems	Negative	0	1	0
Google Play Store	6a85f269-3951-4dd8-9183-9942a9038b9d	Currently, it is bad and should be reviewed before downloading.	mahmoud saheli	##########			0	ar	us		3	ar	currently bad review download	Negative	1	0	0
Google Play Store	d8892e4f-41a6-4d96-9d87-6675989c2841	Foolish and stupid application... I wish you would learn from Al Rajhi Bank application and make your text messages in English because we are Arabs... Update and improve your services before you miss the train.	تركي	##########			0	ar	us		1	ar	foolish stupid application wish would learn al rajhi bank application make text message english arabs update improve service miss train	Negative	1	1	0
Google Play Store	1e32fea5-3923-4d59-ad22-160ddd216d8b	Unfortunately, the application is bad after the update, and I am unable to access my account. Please solve the problem as soon as possible.	SAOD B	##########			2	ar	us		1	ar	unfortunately application bad update unable access account please solve problem soon possible	Negative	1	1	0
Google Play Store	a61061a8-569f-4f20-969a-74ecb815b6a1	The application has not been working for two days. Please resolve the problem as soon as possible.	مصعب حسين	##########			3	ar	us		2	ar	application work two days please resolve problem soon possible	Negative	0	1	0
Google Play Store	dc8f90da-4837-4cd4-87e2-cff52fbc431e	Very bad, it's a lock that doesn't open easily.	Om Kenan	##########			0	ar	us		1	ar	bad lock doesnt open easily	Negative	1	1	0
Google Play Store	5943e3e2-badf-4c72-9448-f0ca4fa35d10	"I have exceeded the allowed limit for activating multiple devices. Please fix your application. Thank you."	Ali Al-Obaid	##########			3	ar	us		4	ar	exceed allow limit activate multiple devices please fix application thank	Negative	0	1	1
Google Play Store	d15ceb17-bda3-46b9-bf97-12f5d733bf15	For those who are experiencing a problem with logging in, delete the application and reinstall it again.	احمد بومحمد	##########			0	ar	us		2	ar	experience problem log delete application reinstall	Neutral	0	1	0
Google Play Store	98f97a3a-b53f-49a0-9522-d1a0d204bd8e	We want from you to increase development and improve the experience.	ABUSUEUD ABUSUEUD	##########			0	ar	us		5	ar	want increase development improve experience	Positive	1	0	0
Google Play Store	80808785-4a01-4417-a4b3-fb6de22b4225	The application is very slow and sometimes it crashes. It is not possible to execute a request at the moment.	حسن أبوحمد	##########			2	ar	us		1	ar	application slow sometimes crash possible execute request moment	Negative	0	1	1
Google Play Store	a14516c3-15b5-434f-82f3-0f8e598e1474	I am trying to access the application, but it gives me a message that I have exceeded the allowed devices. The application is only installed on my phone. It is asking me to review the settings. Where and how can I review the settings?	Hussain Rasslan	##########			35	ar	us		4	ar	try access application give message exceed allow devices application instal phone ask review settings review settings	Negative	0	1	0
Google Play Store	ee17d85d-2fbe-4c14-9d58-3ff533b5d533	A the worst application that causes a lot of damage.	HANI ALDOKHI	##########			0	ar	us		1	ar	bad application cause lot damage	Negative	1	0	0
Google Play Store	98a788d1-91d3-411a-8409-6ccc3f5b2d10	The application is not working for me, whenever I try to log in, it says that the username is currently blocked! Sorry, but how long will this problem with the application persist? We need it to be open all the time, every time the same thing happens. We will wait, but if it continues, we will have to delete the application.	Raghad. Nabil.a	##########			1	ar	us		1	ar	application work whenever try log say username currently block sorry long problem application persist need open time every time thing happen wait continue delete application	Negative	0	1	0
Google Play Store	3e607876-1d9c-48e5-a85f-d18f94459245	There is currently a problem with the registration process. Please resolve the issue as soon as possible. ☝🏼	Walad7arb - Be happy	##########			1	ar	us		1	ar	currently problem registration process please resolve issue soon possible	Negative	0	1	0
Google Play Store	551c9239-1f19-4c5a-8090-aa59bfd9b667	Unfortunately, the application has become very bad after the Ramadan update. It does not respond to either the login code, the quick code, or anything else.	عبدالرحمن شنو	##########			7	ar	us		1	ar	unfortunately application become bad ramadan update respond either login code quick code anything else	Negative	1	1	0
Google Play Store	6b0f7dd5-08d3-4417-95c0-cdb5dd412e1b	The application was excellent before the update. Now, it has experienced some slowness, freezing, and sometimes it does not accept login.	حسن الشريف كاتب وروائي	##########			3	ar	us		2	ar	application excellent update experience slowness freeze sometimes accept login	Negative	1	1	1
Google Play Store	f2451e3f-0b41-4831-bcbe-71d2dbc1b3eb	Hey guys, after the last update, the application has become very slow and I can't log in. Please solve the problem urgently.	b Laddi	##########			2	ar	us		2	ar	hey guy last update application become slow cant log please solve problem urgently	Negative	0	0	1
Google Play Store	a4179fba-ff68-4074-aefe-9aea0c2bc00c	This bank is not suitable for human use.	BADR ALDOSARI	##########	عزيزي العميل، نشكرك لتقييم خدمة فرنسي موبايل. يسعدنا خدمتكم	##########	1	ar	us		1	ar	bank suitable human use	Negative	1	0	0
Google Play Store	80e67c49-44d8-45a6-b705-e64484da8732	After the Ramadan update, it has become erratic, sometimes it works and sometimes it doesn't work.	ĶhăŁǒǾǒĐĬ Méłèbăřý	##########			2	ar	us		2	ar	ramadan update become erratic sometimes work sometimes doesnt work	Negative	0	1	1
Google Play Store	69bb4409-02c4-45e1-a55b-593193b2437a	After the update, it became very difficult.	هاني العنتري	##########			1	ar	us		1	ar	update become difficult	Negative	1	0	0
Google Play Store	5e9f1efd-4808-4bcc-b752-e9cff6b2d170	Very slow...	Turki Saad	2022-04-06 05:45:00			1	ar	us		1	ar	slow	Negative	0	0	1
Google Play Store	a18b6268-0b4e-44a9-8167-51265555413c	The application is very, very, very bad after the latest update.. It is necessary to solve the problem.	أبو رياض	2022-04-06 01:48:00			1	ar	us		1	ar	application bad late update necessary solve problem	Negative	1	1	0
Google Play Store	89e2add0-b937-433b-ad18-b1d9d3a159e2	New update and application worse than before. We are waiting for the bug to be fixed.	Fr Gh	##########			7	ar	us		1	ar	new update application bad wait bug fix	Negative	1	1	0
Google Play Store	3420fa88-5dbc-4b7b-84d9-0d0d17149188	Very, very bad application, very slow, makes the heart skip a beat just to open, doesn't add any benefit, and doesn't pay overdue bills or send late messages.	Ahmed Khlil	##########			13	ar	us		1	ar	bad application slow make heart skip beat open doesnt add benefit doesnt pay overdue bill send late message	Negative	1	1	1
Google Play Store	730d3e6e-938d-43cb-8204-40f3ef5566bb	The update was made at the beginning of the month of Ramadan 2022, and since then the program has become very heavy, slow, and unfortunately, not useful. The banking services have deteriorated from bad to worse.	Seed ALBlad	##########			1	ar	us		1	ar	update make begin month ramadan since program become heavy slow unfortunately useful bank service deteriorate bad bad	Negative	1	0	1
Google Play Store	8bd4a2a7-ccd8-4c9c-b97e-cbfd7dc93f84	Fine	Ahmed Elageery	##########			0	ar	us		5	ar	fine	Positive	0	0	0
Google Play Store	e10f0e8a-58c3-4d97-96d1-80b1a8bbc142	After the Ramadan update, it has become very slow. You can't login using fingerprint, and no verification message is sent when entering the password. It doesn't open immediately, and after a minute it gives you an incorrect password message.	Abo Moaaz	##########			1	ar	us		1	ar	ramadan update become slow cant login use fingerprint verification message send enter password doesnt open immediately minute give incorrect password message	Negative	0	1	1
Google Play Store	9a5052fe-558f-42ef-abc6-1198215dda49	The bank I work at has the worst employees in terms of their manners and interaction skills.	Sami Altaieb	##########			0	ar	us		1	ar	bank work bad employees term manners interaction skills	Negative	1	0	0
Google Play Store	39e79cc7-c191-41b5-9610-63e18e5423d1	not good	عبدالله الخيبري	##########			1	ar	us		1	ar	good	Negative	0	0	0
Google Play Store	0c595d05-a31b-43fd-b26e-497a228c88d7	I am trying to recover my password or activate what does not work with me.	مشعل بن علي	##########			1	ar	us		1	ar	try recover password activate work	Neutral	0	1	0
Google Play Store	be46a9a3-1367-46d5-99da-35b951e302a2	A bank that is unreliable and complicates the trust of its customers.	القادم اجمل٢٠٣٠م الوسام ثقه وشموخ مع ابوسلمان (الوسام٢٠٣٠م ثقه وشموخ)	##########			0	ar	us		1	ar	bank unreliable complicate trust customers	Negative	1	0	0
Google Play Store	2a17085b-2daa-4309-8eca-e8eadf4dfaa7	A very bad application since its inception. How can the bank help me?	ابو علي	##########			1	ar	us		1	ar	bad application since inception bank help	Negative	1	0	0
Google Play Store	18e96fbe-acbf-4102-a0a8-65e8f339d735	We hope it will be better than this and better than this, and easy for the elderly to use the application.	محمد عسيري	##########			2	ar	us		5	ar	hope good good easy elderly use application	Positive	1	0	0
Google Play Store	4b9b3da6-e394-4c0d-8b93-6db738c78519	You promised us to improve everything from messages to settings to transfers, but nothing at all.	Samer Adil	##########			0	ar	us		1	ar	promise us improve everything message settings transfer nothing	Negative	1	0	0
Google Play Store	333757d8-4362-47b3-b72e-f5e62e46a23b	Excellent, but this day is very [bad/exhausting]....!!! Why?????	MAMDOUH ALSENJARY	##########			1	ar	us		5	ar	excellent day badexhausting	Negative	1	0	0
Google Play Store	78af0455-e879-4d8f-9850-90418d0c1895	"I am facing a problem with logging in. I have tried several times, but unfortunately, I am still facing the same issue. It seems that the application has a glitch and needs to be updated by the developer. I am forced to uninstall the application as I did not benefit from it."	احمد آل حوذان	##########			76	ar	us		1	ar	face problem log try several time unfortunately still face issue seem application glitch need update developer force uninstall application benefit	Negative	0	1	0
Google Play Store	d56e0abc-db49-4be0-bbbb-36cf1731fbdb	A bad application that reflects poorly on the bank...	Sharaf Alshareef	##########			0	ar	us		1	ar	bad application reflect poorly bank	Negative	1	0	0
Google Play Store	8164fb6c-1e47-49e1-bc09-3cdbd3a7ae76	Great	Hhfhffhh Hfhfhfhdh	##########			0	ar	us		5	ar	great	Positive	0	0	0
Google Play Store	fa486934-c090-43c3-93d2-9fa385649168	Excellent, but sometimes it doesn't open when logging in and gives me an error even though the information is correct.	السيد رضا	##########			5	ar	us		5	ar	excellent sometimes doesnt open log give error even though information correct	Negative	1	1	0
Google Play Store	04dc0e48-aac2-4956-bbb7-e0e46e9f51f9	I face a problem whenever I try to log in, I am unable to do so due to a message saying "Your request cannot be executed. Please try again later."	فاطمه خميس	##########			1	ar	us		1	ar	face problem whenever try log unable due message say request execute please try late	Negative	0	1	0
Google Play Store	e062929f-e60f-483f-ad47-f682b5d7f37f	Beautiful and very wonderful.	جنوبي حر	##########			0	ar	us		4	ar	beautiful wonderful	Positive	0	0	0
Google Play Store	b9f4c49e-28dc-46c9-9527-9e2b32b901f5	Beautiful	Nagah Elaref	##########			0	ar	us		5	ar	beautiful	Positive	0	0	0
Google Play Store	15195ede-8190-4d01-a41b-dab7222c1df5	Excellent and easy to use.	خميس علي	2022-03-07 00:20:00			0	ar	us		4	ar	excellent easy use	Positive	0	0	0
Google Play Store	5f518571-ea32-402c-a5b2-e41082d14dc0	The application has a problem when logging in. It asks me for a verification code, and when I enter the code, it displays an error in the end.	2023-05-13 00:00:00	##########			0	ar	us		1	ar	application problem log ask verification code enter code display error end	Negative	0	1	0
Google Play Store	57c9d59e-4c3a-4618-8910-5b7e134cb3bc	Dirty rotten bank	حاوي العبسي	##########			0	ar	us		1	ar	dirty rotten bank	Negative	1	0	0
Google Play Store	d1994a7d-3300-4b76-91d0-bf4c5889335c	Excellent bank	MUSTAFA Muslam	##########			0	ar	us		5	ar	excellent bank	Positive	0	0	0
Google Play Store	9ef82c69-2677-4b4d-bf8b-ccc86bf811a4	Excellent and easy.	ياسين الياسين	##########			0	ar	us		5	ar	excellent easy	Positive	0	0	0
Google Play Store	46893045-ebf4-4f7d-9136-1bd3e9bf337b	The application does not open.	hassan Ammari	##########			0	ar	us		1	ar	application open	Neutral	0	1	0
Google Play Store	127811b9-f923-4e2d-834d-ad5599064757	tired	atayh alzahr	##########			0	ar	us		3	ar	tire	Neutral	1	0	0
Google Play Store	c25ca8e1-ac1c-42eb-8215-a761d797e503	The application is very slow and needs to be fixed. There are problems when adding beneficiaries.	MOHAMMED HAMED	##########			13	ar	us		1	ar	application slow need fix problems add beneficiaries	Negative	0	0	1
Google Play Store	33479fc1-678c-4fb6-bf7a-9fc420bae808	French bank 100%	برق رعد صاعقة طيارة حربية مدرعة مرعبة 100%	##########			0	ar	us		5	ar	french bank	Neutral	1	0	0
Google Play Store	b18440db-fa11-4c86-97fd-a8885149187b	I have downloaded the French Mobacel application, but when entering the required information, an error message appears, saying "A technical error in our systems is preventing you from continuing with your request. We apologize for the inconvenience, please try again." I have tried several times to open the application at different intervals, but it still doesn't open. What is the reason, and how …	ZAHID MALAKA	##########			84	ar	us		2	ar	download french mobacel application enter require information error message appear say technical error systems prevent continue request apologize inconvenience please try try several time open application different intervals still doesnt open reason open application	Negative	0	1	0
Google Play Store	0abc0918-c0e4-4484-b129-5cb3dff7e80c	After the updates, it is excellent.	M	##########			0	ar	us		5	ar	update excellent	Positive	0	0	0
Google Play Store	515030b8-b1d1-4a17-8139-2b936de0466f	A little slow.	اتت تتت	##########			0	ar	us		4	ar	little slow	Neutral	0	0	1
Google Play Store	cdc05279-ca14-4474-9e6b-252442244bb7	Excellent and fast application with quick response. The French bank is also a service bank for the community. There is also ease in applying for loans, unlike other complicated banks that require complex conditions. It deserves 100 stars.	‪Y7AGRI ياهاجري (‫وفي‬‎)‬‏	##########			1	ar	us		5	ar	excellent fast application quick response french bank also service bank community also ease apply loan unlike complicate bank require complex condition deserve star	Positive	1	0	0
Google Play Store	0a16dc31-e6e8-4029-af78-22f2cb6eb944	The name of the person being transferred does not appear during the transfer process.	Ahmed Elgebaly	##########			4	ar	us		1	ar	name person transfer appear transfer process	Neutral	1	1	0
Google Play Store	1b5b8040-3b81-4b77-a311-3187ce658e44	"I put a star to comment. As for the banks, they have difficult programs and transactions. You should learn from other banks the ease of access and transfer with just one click. But the French ones make the heart anxious and they don't let you in."	Rehab MA	##########			0	ar	us		1	ar	put star comment bank difficult program transactions learn bank ease access transfer one click french ones make heart anxious dont let	Negative	1	0	0
Google Play Store	5bd4d882-e036-4d21-8648-2c4ed28fecae	Very good application.	Mohammed Mohy	##########			0	ar	us		5	ar	good application	Positive	0	0	0
Google Play Store	b7e289db-9f77-47f4-96ae-0d0f99c9052c	The worst banking experience ever, whether it's the application or the website. How many times a day I have to activate my username, more than 8 times a day. It's a truly failed bank in terms of technology. Disconnect your electronic channels and focus on serving customers in branches. It's not a shame for a person to admit their failure, but to add to that failure, every week they disable all el…	mohamed khiruldin	##########			17	ar	us		1	ar	bad bank experience ever whether application website many time day activate username time day truly fail bank term technology disconnect electronic channel focus serve customers branch shame person admit failure add failure every week disable electronic channel disrupt transactions loss star give wish could withdraw	Negative	1	1	0
Google Play Store	57570a0b-884e-474c-bcb9-3a8347816384	The application does not work; it has been deleted. 😊	Silver Max	##########			0	ar	us		1	ar	application work delete	Negative	0	1	0
Google Play Store	c03795fb-cdde-4cdd-b593-1e2ef1ca1101	It has been a week and it's not opening. It says it needs an update, but it's not updating... I'm stuck.	nony mas	##########			0	ar	us		1	ar	week open say need update update im stick	Negative	0	1	0
Google Play Store	43ad2936-ca51-4628-acb7-e0abb7ba0d29	Why aren't the transfer steps as easy as other banks?	نشمي اليامي	##########			0	ar	us		1	ar	arent transfer step easy bank	Negative	1	0	0
Google Play Store	d957bdeb-e6e5-40f0-a2aa-dddf9241c034	There is a problem with logging in, text messages are not being received.	صابر ابو مكه saber abu makkah	##########			0	ar	us		1	ar	problem log text message receive	Negative	0	1	0
Google Play Store	8aae8cb6-4c45-40e2-aa59-31c0ab49caa7	I do not recommend it.	A A	##########			0	ar	us		1	ar	recommend	Negative	1	0	0
Google Play Store	3967302b-9c96-4854-a35d-5a635be926f7	The application does not open?	Shaeda	2022-02-07 04:54:00			0	ar	us		1	ar	application open	Neutral	0	1	0
Google Play Store	1a4c1be7-94c7-4a51-9be5-eb8dd2f0ea42	There is no online service for renewing identification at the bank, you must visit the branch in person.	Abdullah	##########			0	ar	us		4	ar	online service renew identification bank must visit branch person	Neutral	0	1	0
Google Play Store	ec7b0745-4094-44f4-b0ac-0215d3696923	Very wonderful / Very excellent	ahmad masmaly	##########			0	ar	us		5	ar	wonderful excellent	Positive	0	0	0
Google Play Store	ccf8733c-f346-4a01-a8be-c3070f8c8cd0	The worst application always has a technical glitch. I've been trying to access my account for two days, but I keep getting a technical error message. They send me a code, I enter the code, and I receive the same disappointing message from you guys. Unfortunately, no one seems to care.	mohamed elofi	##########			0	ar	us		1	ar	bad application always technical glitch ive try access account two days keep get technical error message send code enter code receive disappoint message guy unfortunately one seem care	Negative	1	1	0
Google Play Store	0bab751a-b0bb-4db8-81ee-746746988a75	A very bad program, it has a lot of problems. I'm trying to log in but it doesn't accept the password.	الحامد الهاشمي	##########			1	ar	us		1	ar	bad program lot problems im try log doesnt accept password	Negative	1	1	0
Google Play Store	873e4a2a-68c5-4ccc-ad49-58753f234107	Failed program does not work.	Art&sweet Hanone	##########			0	ar	us		1	ar	fail program work	Negative	0	1	0
Google Play Store	5f30cc9f-e163-4be5-a3bd-7b76b5a269e4	Excellent, thank you very much for your appreciation and respect.	Como Ndw	##########			0	ar	us		5	ar	excellent thank much appreciation respect	Positive	0	0	0
Google Play Store	f8eb11c5-55ca-40a7-96f9-b8416606127b	Every time I try to convert, it always says that the operation cannot be completed... especially after the update.	صحيفة الأثـــــــــير	##########			0	ar	us		1	ar	every time try convert always say operation complete especially update	Negative	0	1	0
Google Play Store	1785b58b-ab52-429d-bb7b-b4709543adab	The application is a piece of garbage. Activation messages are delayed and the services are malfunctioning.	Ab000d ksa	##########			0	ar	us		1	ar	application piece garbage activation message delay service malfunction	Negative	0	1	1
Google Play Store	9c8cc14b-2cff-45a5-81ce-86c97f5f09e5	Good	مدالله النفيعي	##########			0	ar	us		1	ar	good	Positive	0	0	0
Google Play Store	899fad61-e6b6-4d04-8284-d5cd0dd4adc1	Excellent, very good.	أبوبسوم الخبراني	##########			0	ar	us		5	ar	excellent good	Positive	0	0	0
Google Play Store	707f73b5-acce-4c98-8650-bf266fee184f	The program is very, very, very bad. When opening the page, it takes a long time to send the text message.	فهد الوايلي	##########			1	ar	us		1	ar	program bad open page take long time send text message	Negative	1	0	1
Google Play Store	48e74ee5-ac6c-4276-9800-3213a98c8a9d	Even the star is crowded, it does not open or send a verification message.	Maher Alsaleh01	##########			1	ar	us		1	ar	even star crowd open send verification message	Negative	0	1	0
Google Play Store	8d3476d1-7a4a-43df-b543-80ea8048e409	The installation has not been completed for 3 days.	مريع البشري	##########			0	ar	us		5	ar	installation complete days	Negative	0	1	0
Google Play Store	cb8553fa-f9b3-4706-9c69-be1c4a8220d4	The update has not been completed.	A A	##########			0	ar	us		1	ar	update complete	Neutral	0	1	0
Google Play Store	62238d1f-9ac8-4dc0-b5bf-cc0efb9a596e	Good.	Ssmeh Shdrif	##########			0	ar	us		5	ar	good	Positive	0	0	0
Google Play Store	9a330ba6-54ad-4f5d-b6ef-92b2b64d14ac	It doesn't deserve even a single star, the worst bank ever.	راغب العسكر	##########			0	ar	us		1	ar	doesnt deserve even single star bad bank ever	Negative	1	0	0
Google Play Store	63145e97-8c65-41e0-afc6-ea9398113678	A noticeable change, a thousand thanks for the development.	محمد جراب	##########			0	ar	us		5	ar	noticeable change thousand thank development	Positive	1	0	0
Google Play Store	a1d3bf18-1f84-4092-9b22-548133dc489e	Okay	abdul alhadi	##########			0	ar	us		5	ar	okay	Positive	0	0	0
Google Play Store	06d049ee-6474-465f-815f-6841dbc8e9e3	Weak..	Ibrahim Hadadi	##########			0	ar	us		1	ar	weak	Negative	1	0	0
Google Play Store	9bcf355b-fe69-43dc-be7a-cb35c893fdb4	Excellent.	Ahmed Eltayeb	##########			0	ar	us		5	ar	excellent	Positive	0	0	0
Google Play Store	2c63e44d-2d56-4e26-8f7f-4dec8305b88d	This application is excellent.	عبدالرحمن القحطاني	##########			0	ar	us		5	ar	application excellent	Positive	0	0	0
Google Play Store	86a3c6cf-82b6-451f-9bd7-ff5a6f97b004	Excellent and wonderful.	الصادق دفع الله	##########			0	ar	us		5	ar	excellent wonderful	Positive	0	0	0
Google Play Store	fb548481-9d73-49e4-a70c-ef605707ffdc	I always face a problem logging in because my password or username is incorrect every time.	Mohammed Saleh	##########			22	ar	us		1	ar	always face problem log password username incorrect every time	Negative	0	1	0
Google Play Store	0675887f-feb4-4ae2-a898-79136766870d	Masha Allah, Tabarak Allah.	عمر ابوشرحه	##########			0	ar	us		5	ar	masha allah tabarak allah	Positive	1	0	0
Google Play Store	66860ad6-76ed-46c9-b097-042ff3e91416	A the worst application from the first time I entered the password and username, it gives me a message that there's an error in our systems. Despite that, it sends me the code. I enter the code, but it doesn't accept it. I'm tired, I'm going to cancel my account.	٢٥ ٢٦	##########			1	ar	us		1	ar	bad application first time enter password username give message theres error systems despite send code enter code doesnt accept im tire im go cancel account	Negative	1	1	0
Google Play Store	47208cb0-36bc-4c71-99bd-31e77bd22ab7	Great efforts.	ali ali	##########			0	ar	us		5	ar	great efforts	Positive	0	0	0
Google Play Store	89efbb4e-5c38-483a-a53d-2483aebb32f6	Excellent application and easy completion of services quickly.	HG BA	##########			0	ar	us		5	ar	excellent application easy completion service quickly	Positive	0	0	0
Google Play Store	fffc55fb-2761-44a6-a120-e20a69ca4240	My favorite bank.	دروس في فن الكتابه	##########			0	ar	us		5	ar	favorite bank	Positive	0	0	0
Google Play Store	9d16084e-bbd0-4f0b-90e9-8cc2805b1afd	Excellent.	جلال الهاشم	##########			0	ar	us		5	ar	excellent	Positive	0	0	0
Google Play Store	47c70e5d-2107-4438-88cc-a266ae8f6903	Very good.	Mohd Eid	##########			0	ar	us		5	ar	good	Positive	0	0	0
Google Play Store	f4c01070-787f-4503-a83b-e424cb78190c	Excellent very much.	سلطان السلطان	##########			0	ar	us		5	ar	excellent much	Positive	0	0	0
Google Play Store	8ea7d665-384f-4c2c-831b-8640110f4600	Excellent	فيصل مغفوري	##########			0	ar	us		5	ar	excellent	Positive	0	0	0
Google Play Store	4abd43a5-1943-43d9-8226-f89b0edaf8bb	ewtw	faisal salman	##########			0	ar	us		1	ar	ewtw	Neutral	0	0	0
Google Play Store	816405f6-2436-477f-b1d7-06bcfc492b68	Very excellent, useful and easy to use.	مرعي الغامدي	##########			0	ar	us		4	ar	excellent useful easy use	Positive	0	0	0
Google Play Store	7d2e34f1-a627-485a-accf-2530185e43d1	amazing	alnwfy alroale	##########			0	ar	us		5	ar	amaze	Positive	0	0	0
Google Play Store	da398a02-ae26-4dc3-8fc5-ade6e9175428	It's nice now.	عبيان اليامي	##########			3	ar	us		5	ar	nice	Positive	0	0	0
Google Play Store	4279d844-308a-447e-8394-0213cdcce2ea	Buzz buzz buzz	سبحان الله وبحمده	##########			0	ar	us		1	ar	buzz buzz buzz	Neutral	0	0	0
Google Play Store	a12e065a-886b-42e0-859c-9f04fa50bd3b	Very great application.	jafar alsalmi	##########			0	ar	us		4	ar	great application	Positive	0	0	0
Google Play Store	0467e81a-8c78-490e-89db-8b9195f9ed66	Very excellent and easy, and it provides all the services. Thank you and good luck for more progress and success.	Hassan Abdallh	2022-01-09 05:35:00			0	ar	us		5	ar	excellent easy provide service thank good luck progress success	Positive	0	0	0
Google Play Store	e9b9bf37-182b-4499-81ab-767ee427c003	The program is heavy.	Tarek Gomaha	##########			0	ar	us		3	ar	program heavy	Neutral	0	0	1
Google Play Store	dcfd927c-df76-4325-bcde-c43cb94aef1e	Middle or midst	عمار عمار	##########			0	ar	us		5	ar	middle midst	Neutral	1	0	0
Google Play Store	d92082ce-f569-48cd-8cf4-fe252b25a521	Very good	محمد عبدو	##########			0	ar	us		5	ar	good	Positive	0	0	0
Google Play Store	0fc46bdc-d057-456e-9784-e6c6d659837d	Bitter experience	Tareq Alkwaiti	##########	عزيزي العميل، يؤسفنا سماع ذلك و نعمل جاهدين على تحسين و تطوير خدماتنا و منتجاتنا. رضاكم غايتنا	##########	0	ar	us		1	fa	bitter experience	Negative	1	0	0
Google Play Store	3195dbd7-810e-4c2d-b8fa-0d152649df40	gw	الكنج فلا تة	2023-06-08 05:43:00	عزيزي العميل, لنتمكن من مساعدتك يرجى منكم التواصل مع الدعم الفني من خلال البريد الإلكتروني FransiMobileAdmin@alfransi.com.sa تسعدني خدمتك	##########	0	ar	us		5	fa	gw	Neutral	0	0	0
Google Play Store	b927a588-fb1b-4ed0-85a7-f18a82b5310d	"I don't want to create/register my account."	hossam khaled	##########			0	ar	us		1	fa	dont want createregister account	Negative	0	1	0
Google Play Store	c6c38099-fd9c-4a98-866c-e5ae2fa38639	Excellent	محمد سعيد	##########			0	ar	us		5	fa	excellent	Positive	0	0	0
Google Play Store	106649a4-dca0-43a6-9fcc-4a300863fa24	Excellent.	az azz	##########			0	ar	us		5	fa	excellent	Positive	0	0	0
Google Play Store	b09ea146-6704-4a1b-a336-1bc27d64ee5b	Zero	فنون جوال	##########			0	ar	us		1	fa	zero	Neutral	1	0	0
Google Play Store	a3f09012-6771-4c52-9fee-e7e5da7c54da	Excellent excellent excellent excellent excellent *****✔✔✔🇸🇦🇸🇦👍👍🏆🏆🎁🎁🙏🙏👏👏✔✔	mfrH Fda	##########			0	ar	us		5	fa	excellent excellent excellent excellent excellent	Positive	0	0	0
Google Play Store	9a7db031-c9d9-4223-b189-77022fa7bd6e	Excellent	Ygyy Hhhh	##########			0	ar	us		5	fa	excellent	Positive	0	0	0
Google Play Store	9f819c94-596d-4a0f-9605-10d649dd7249	Eyeti	faisal salman	##########			0	ar	us		5	sd	eyeti	Neutral	1	0	0
Google Play Store	8309c240-213f-4937-ae1c-b123cf686f59	sda	محمد رشاد	##########			0	ar	us		1	sd	sda	Neutral	0	0	0
Google Play Store	8b6eb269-795d-478a-9b2f-7647a1c68713	My job/labor/work.	An Am	##########			0	ar	us		5	sd	joblaborwork	Neutral	0	1	0
Google Play Store	b015cd7d-401d-4fca-8d77-6535dfa62530	fasF	ابو فراس مهدي	##########			0	ar	us		4	sd	fasf	Neutral	0	0	0
Google Play Store	e77211c5-538c-48e9-9cd1-be884b278472	Flexible	احمد هوساوي	##########			0	ar	us		5	sd	flexible	Neutral	1	0	0
Google Play Store	24de4c18-d3d2-478b-8e7e-34151c512403	Veryyyyyyyyyyyyyyyyyyyy believable	خالد آل إبراهيم	##########	عزيزي العميل, لنتمكن من مساعدتك يرجى منكم التواصل مع الدعم الفني من خلال البريد الإلكتروني FransiMobileAdmin@alfransi.com.sa تسعدني خدمتك	##########	0	ar	us		1	ps	veryyyyyyyyyyyyyyyyyyyy believable	Positive	0	0	0
Google Play Store	2245a3b6-b707-468e-8092-4425866ace07	Bad	Mody Elmasre	##########			0	ar	us		1	ps	bad	Neutral	1	0	0
Google Play Store	51b54bf7-4149-4da9-9105-b572c63d8068	Bad.	عبده احمد	##########			0	ar	us		5	ps	bad	Negative	1	0	0
Google Play Store	8f28a530-1e0b-4a1a-89f8-cf49c3a17b15	Bad and slow.	Omda Gomaa	##########			0	ar	us		1	ps	bad slow	Negative	1	0	1
Google Play Store	b5808302-5b15-4272-87fb-7f04d70b7d86	Excellent	Ahmad Al-Zain	##########			0	en	us		5	ur	excellent	Positive	0	0	0
Google Play Store	d46cbe49-c9aa-4843-be6c-05ffbae7c46a	Excellent	أبو سعيد	##########	عزيزي العميل، نشكركم على ثقتكم بالبنك السعودي الفرنسي ونتطلع دائما لرضا عملائنا.	##########	0	ar	us		5	ur	excellent	Positive	0	0	0
Google Play Store	45776fd4-b53e-4426-8f68-2312cec3cb2c	Excellent	Mohd Abdoon	##########	عزيزي العميل، نشكركم على ثقتكم بالبنك السعودي الفرنسي ونتطلع دائما لرضا عملائنا.	##########	0	ar	us		5	ur	excellent	Positive	0	0	0
Google Play Store	79ed3db1-914e-4fc4-bd83-5015fdd28f66	Excellent	Zugbear Mohamaad	##########	عزيزي العميل، نشكركم على ثقتكم بالبنك السعودي الفرنسي ونتطلع دائما لرضا عملائنا.	##########	0	ar	us		5	ur	excellent	Positive	0	0	0
Google Play Store	504d36a9-a64b-49a2-a686-33d3900a337b	Excellent	Abdalla Elsersawy	##########	مرحبا عزيزي، نقدر لك ثقتك بنا ونتطلع لتقديم الأفضل. شكرا لتواصلك	##########	0	ar	us		5	ur	excellent	Positive	0	0	0
Google Play Store	f4bf7d49-59d4-44f9-8645-c3009e887800	Excellent	Ibrahim Alsaeed	##########	عزيزي العميل, نشكركم على ثقتكم بالبنك السعودي الفرنسي و نتطلع دائما لرضا عملائنا	##########	0	ar	us		5	ur	excellent	Positive	0	0	0
Google Play Store	52f8a399-f454-437e-a464-1bb96d2bb0e2	Excellent	منصور المغذوي	##########	عزيزي العميل، نشكركم على ثقتكم بالبنك السعودي الفرنسي ونتطلع دائما لرضا عملائنا.	##########	0	ar	us		5	ur	excellent	Positive	0	0	0
Google Play Store	a0ff2a64-e879-425f-b06b-a951451ba4d0	Excellent	Aly Mahanna	##########	عزيزي العميل, نشكركم على ثقتكم بالبنك السعودي الفرنسي ونتطلع دائما لرضا عملائنا. رضاكم غايتنا	##########	0	ar	us		5	ur	excellent	Positive	0	0	0
Google Play Store	adc374cc-ebeb-47f4-b818-f8d24b3fb127	Excellent.	Ali	##########	عزيزي العميل, نشكركم على ثقتكم بالبنك السعودي الفرنسي ونتطلع دائما لرضا عملائنا. رضاكم غايتنا	##########	0	ar	us		5	ur	excellent	Positive	0	0	0
Google Play Store	3c24af11-bab6-4043-9413-c44c99550a68	Excellent	NOD Alaseeri	##########			1	ar	us		5	ur	excellent	Positive	0	0	0
Google Play Store	7c0aac59-cee8-4be9-b2cd-1dd37738b392	trash and crap and slippers	انا هم	##########			0	ar	us		1	ur	trash crap slippers	Negative	1	0	0
Google Play Store	f550f954-42bf-48be-b754-6c04e141750f	Excellent.	Asso Hana	##########			0	ar	us		1	ur	excellent	Positive	0	0	0
Google Play Store	b95f4846-d775-4d5c-866a-0be22ce4cdd2	Excellent	ثابت سعد	##########			0	ar	us		5	ur	excellent	Positive	0	0	0
Google Play Store	0aeffd47-7896-40f6-9cad-8fc478cd82a1	Excellent	ابو سعيد البشيري	##########			0	ar	us		5	ur	excellent	Positive	0	0	0
Google Play Store	fe0d4f0c-311d-401c-9343-0fa15777bcee	Excellent	aljory zozo	##########			0	ar	us		5	ur	excellent	Positive	0	0	0
Google Play Store	65f482b0-da5e-4eb5-bffe-c36f5f047cbc	Excellent	marwan almujaydir	##########			0	ar	us		5	ur	excellent	Positive	0	0	0
Google Play Store	7eabd1e6-6a84-4848-98ac-8c47ca0f2e1b	Excellent.	ابو يزن القبطان	##########			0	ar	us		5	ur	excellent	Positive	0	0	0
Google Play Store	0d439f5c-53e6-45f7-baca-818f03743a9c	Excellent	Hgghh Hgkkk	##########			0	ar	us		5	ur	excellent	Positive	0	0	0
Google Play Store	133f1409-dd8f-4c38-bc8a-54dee4c69377	Excellent	اسامه عبدالله	##########			0	ar	us		5	ur	excellent	Positive	0	0	0
Google Play Store	8b144797-6b77-460b-abfe-ae0144ac8cec	Excellent	Moses Lerry	##########			0	ar	us		5	ur	excellent	Positive	0	0	0
Google Play Store	4cc8c6cc-06d6-4fb6-b69f-6318f39338d4	Excellent.	ابوراضي السلماني ”ابوراضي“ السلماني	##########			0	ar	us		5	ur	excellent	Positive	0	0	0
Google Play Store	bdcf5db1-8745-489f-a2bc-0980be8ca744	Excellent	MOHAMMED Al-Otaibi	##########			0	ar	us		5	ur	excellent	Positive	0	0	0
Google Play Store	150a8108-e529-4df9-b81f-2d1fb9a32a1c	Excellent	عثمان عبدالله	##########			0	ar	us		5	ur	excellent	Positive	0	0	0
Google Play Store	5c31d103-ec0f-4baf-8feb-8f5a91f74cc6	Excellent	Malaz D.d	##########			0	ar	us		5	ur	excellent	Positive	0	0	0
Google Play Store	eb1674f1-e1ec-44d0-9b7d-107bffbf3824	Great!	Fahad Ksa	##########			0	ar	us		5	ur	great	Positive	0	0	0
Google Play Store	87c28aa8-8ba9-49a5-8566-afbe99e7d0ee	Excellent	Abdulrahman Mohamed	2022-08-04 02:29:00			0	ar	us		5	ur	excellent	Positive	0	0	0
Google Play Store	7e492ad6-148a-439d-bb62-4bcc6a0e092e	Excellent	مودي Mode__moodde	2022-08-03 02:13:00			0	ar	us		5	ur	excellent	Positive	0	0	0
Google Play Store	bdf5f788-8e8e-4034-8d49-0475e013d2be	Excellent	ABOBAKR AlHasany	##########			0	ar	us		5	ur	excellent	Positive	0	0	0
Google Play Store	fb69a6a0-5947-4eff-9689-8d98c8eb6686	Excellent	ماجد مساوي (العالمي)	2022-07-09 05:29:00			0	ar	us		5	ur	excellent	Positive	0	0	0
Google Play Store	cae5cbe0-9f4f-425a-8efa-73f183515539	Excellent	Aiham Doully	##########			0	ar	us		5	ur	excellent	Positive	0	0	0
Google Play Store	6e8ed130-d60c-4d83-b46f-8daab1165fc5	Excellent	‪MYHAKAMI “‫أبو فيصل‬‎” الحكمي‬‏	##########			0	ar	us		5	ur	excellent	Positive	0	0	0
Google Play Store	afe8e155-c206-4694-8603-4191b0705453	Excellent	Saif G	##########			0	ar	us		5	ur	excellent	Positive	0	0	0
Google Play Store	abdfc240-df81-4c41-b322-a9e73ec730a8	Excellent	عبدالله العلي	2022-06-04 08:20:00			0	ar	us		5	ur	excellent	Positive	0	0	0
Google Play Store	f424ca3c-a00a-49ce-b657-044b33f82bec	Excellent	Bashir Almula	2022-06-04 02:17:00			0	ar	us		5	ur	excellent	Positive	0	0	0
Google Play Store	6944e917-2f4d-4781-93ec-86b4243dab25	Excellent	F Hy	##########			0	ar	us		5	ur	excellent	Positive	0	0	0
Google Play Store	133b1fa1-1f50-460d-ae62-a0c730a9c14c	Excellent	Mazen Mezoo	##########			0	ar	us		5	ur	excellent	Positive	0	0	0
Google Play Store	0c68c23f-002f-4276-af91-12a854f7ef5c	Excellent	KHALED ELHADADD	##########			0	ar	us		5	ur	excellent	Positive	0	0	0
Google Play Store	b8b26edd-a4d9-48ea-80c8-5ce330c81e25	Excellent	بوأحمد	##########			0	ar	us		5	ur	excellent	Positive	0	0	0
Google Play Store	2a1aa7d1-3c76-45d1-a31c-b27c0e7efb25	Excellent	Jassem Ali	##########			0	ar	us		5	ur	excellent	Positive	0	0	0
Google Play Store	4ac7152d-c850-4b7b-9857-f981ab6d4fc2	Excellent	غازي القصيبي	##########			0	ar	us		5	ur	excellent	Positive	0	0	0
Google Play Store	d6b2462c-81a3-4822-91e8-be8af6a7bead	Accepted	عايض البقمي	##########			0	ar	us		5	ur	accept	Neutral	0	1	0
Google Play Store	dabfb427-eed3-4547-bc21-f45e600bf402	Excellent	Mohamed Elshamy	##########			0	ar	us		5	ur	excellent	Positive	0	0	0
Google Play Store	05b2e6f0-6205-4459-b489-6aef8269b706	Excellent	NAJE ALHABABI	##########			0	ar	us		5	ur	excellent	Positive	0	0	0
Google Play Store	730335e0-d446-441d-99db-580e868649f3	Excellent	عوض القرني	##########			0	ar	us		4	ur	excellent	Positive	0	0	0
Google Play Store	5a65aae3-37b9-4742-a7be-91b41d652569	Excellent.	محمد ابراهيم	##########			0	ar	us		5	ur	excellent	Positive	0	0	0
Google Play Store	6a37cd66-3aca-42eb-be9b-02d841b7f9e4	Excellent	ابورعد اليماني حاجب	##########			0	ar	us		5	ur	excellent	Positive	0	0	0
Google Play Store	affccbd9-5527-488d-bb30-f12736d75fd4	Excellent	mamdooh	##########			0	ar	us		5	ur	excellent	Positive	0	0	0
Google Play Store	ca64ab65-cd8a-4f3d-9a27-ec34e72c1421	Excellent	Ahmed Elsaid	##########			0	ar	us		5	ur	excellent	Positive	0	0	0
Google Play Store	1f404d19-b292-491d-b0e4-f1e381dc3dc0	Excellent	مَازٌنٍ اْلفيٍفيً.	##########			0	ar	us		5	ur	excellent	Positive	0	0	0
Google Play Store	c213de07-3ae6-4745-a25e-e24cf6ce7910	Excellent	Asdaalmgrhi Asdaalmgrhi	2022-04-09 08:14:00			0	ar	us		5	ur	excellent	Positive	0	0	0
Google Play Store	f1b89f49-3b20-489c-a74e-4f018b380932	Excellent	Aziz Mg	##########			0	ar	us		5	ur	excellent	Positive	0	0	0
Google Play Store	0e8d6c5f-e907-4466-821e-6bf6611f50f8	Excellent	مروان المجيدير	##########			0	ar	us		5	ur	excellent	Positive	0	0	0
Google Play Store	db70d9cb-1aa2-44c6-97ac-0469c612d81c	Excellent	علي الضامن	##########			0	ar	us		5	ur	excellent	Positive	0	0	0
Google Play Store	a12f8f15-8968-4a14-8994-e0e312fea565	Excellent	Ail111 hussin	##########			0	ar	us		5	ur	excellent	Positive	0	0	0
Google Play Store	8052b689-1a7c-470e-9f0a-c7cc329ec019	Excellent	وليد عبدالرحمن	##########			0	ar	us		1	ur	excellent	Positive	0	0	0
Google Play Store	1ee10c59-2114-473c-95db-181ac66c970e	Excellent	مأمون الإمام	##########			0	ar	us		5	ur	excellent	Positive	0	0	0
Google Play Store	0b4f1bcd-66c4-47cb-858d-c1e5a809613c	Excellent	faisal shaben	##########			0	ar	us		5	ur	excellent	Positive	0	0	0
Google Play Store	f10d40c6-cb95-45c4-b3b9-78db8ff184c1	Excellent	Bbbb Sddd	##########			0	ar	us		5	ur	excellent	Positive	0	0	0
Google Play Store	402757d1-6273-49ba-a10b-24d57a3c9268	Excellent	Ahmed Majrashi	##########			0	ar	us		5	ur	excellent	Positive	0	0	0
Google Play Store	0c822eaa-2900-4a1a-ad2d-5cf53b083fc2	Excellent	فهد ال دليه	##########			0	ar	us		5	ur	excellent	Positive	0	0	0
Google Play Store	c11dced2-aaa0-43ed-957f-be2f53e1774d	Excellent	hadi balhareth	2022-01-09 01:21:00			0	ar	us		5	ur	excellent	Positive	0	0	0
Google Play Store	709c096c-ddd5-49f8-a63e-9dad1c71f2ed	Excellent ❤️	Samar Aljamea	##########			0	ar	us		5	ur	excellent	Positive	0	0	0
Google Play Store	4407e177-a328-49e3-80b6-cd41d4a3ed02	It keeps stopping whenever I try to log in	Dina Alesawy	##########	Dear customer, We are sorry to hear that and we are working to improve and improve our services and products. Your satisfaction is our main goal	##########	0	en	us		1	en	keep stop whenever try log	Negative	0	1	0
Google Play Store	1c3b0cb6-bd31-40b5-903c-edc3aecea153	FransiMobile is an ideal app for online banking	Salman Ali Khan	##########	Dear customer, Thank you for your trust on BSF services. Your satisfaction is our main goal	##########	0	en	us		5	en	fransimobile ideal app online bank	Positive	0	0	0
Google Play Store	93eac0e5-721f-4f9a-b67b-93b726f9fd5b	Can't login Kept receiving error message: Enable GPS then try again, and even after enabling GPS the error message kept popping up and the app prevented me from logging in. I'm uninstalling and going back to logging from my browser.	TheStarrov	##########	Dear customer, to assist you, please contact our support team through the following email address FransiMobileAdmin@alfransi.com.sa. We are happy to help you	##########	0	en	us		1	en	cant login keep receive error message enable gps try even enable gps error message keep pop app prevent log im uninstalling go back log browser	Negative	0	1	0
Google Play Store	fd25d84b-4a38-4c67-a67f-84ec2e907fd3	One of the best mobile app. I like it..	Md Tanvir Hossain (Shuvo)	##########	Dear customer, Thank you for your trust on BSF services. Your satisfaction is our main goal	2023-08-03 05:10:00	0	en	us		1	en	one best mobile app like	Positive	0	0	0
Google Play Store	92e0adbf-6866-45ff-b6dd-b662df224f57	It's really bad app from this bank I faced many problems before its very slow to open this app now even you can't open my account on this app coz wat they ask you to open GPS I opened but still not response 🤔	محمد	##########	Hello Dear, kindly go to: Settings > look for Fransi Mobile > tab and select: Permissions > allow location tracking while using the app. in case you're still unable to log in afterwards, kindly contact: 8001242121. Thanks for reaching out	##########	0	en	us		1	en	really bad app bank face many problems slow open app even cant open account app coz wat ask open gps open still response	Negative	1	1	1
Google Play Store	be44d209-a887-45d5-9efc-6fb42d59396e	Awsome	Mohmmad Danish	##########	عزيزي العميل, نشكركم على ثقتكم بالبنك السعودي الفرنسي و نتطلع دائما لرضا عملائنا	##########	0	en	us		5	en	awsome	Positive	1	0	0
Google Play Store	ace3248b-5446-47ee-bd33-aaae184d0750	Forced to enable gps	Yasser dali	##########	عزيزي العميل, لنتمكن من مساعدتك يرجى منكم التواصل مع الدعم الفني من خلال البريد الإلكتروني FransiMobileAdmin@alfransi.com.sa تسعدني خدمتك	##########	0	en	us		1	en	force enable gps	Neutral	0	1	0
Google Play Store	0cc50937-4bd2-4ecf-a379-0279cd0dd410	Application was running fine before last update but now GPS is activied and it keeps asking to turn it on. Unfortunately I can not access my account	Hussain Alawi	2023-09-07 03:19:00	Dear customer, to assist you, please contact our support team through the following email address FransiMobileAdmin@alfransi.com.sa. We are happy to help you	2023-09-07 09:12:00	0	en	us		3	en	application run fine last update gps activied keep ask turn unfortunately access account	Negative	0	1	0
Google Play Store	6a987c15-4d7a-4800-835d-f8dd62daaf68	The app desperately needs a major overhaul! Long time ago it used to be be good and efficient. Fast forward today, it's slow, laggy, operations fail for no apparent reasons. Clearly the front- and back-end don't communicate efficiently. The app is out of date and it shows. Major fixes need to be done, you are way behind the competition! 👎	Jay M	##########	Dear customer, We are sorry to hear that and we are working to improve and improve our services and products. Your satisfaction is our main goal	##########	0	en	us		1	en	app desperately need major overhaul long time ago use good efficient fast forward today slow laggy operations fail apparent reason clearly front backend dont communicate efficiently app date show major fix need do way behind competition	Negative	1	1	1
Google Play Store	72fd1429-b2e2-4040-ae5d-776a8c2ea2b1	after this update a local bank transfer is not working plus the slow upload in the start up	JT Amin	##########	Hello Dear, to better assist you kindly contact fransi phone at: 8001242121. Thanks for reaching out	##########	0	en	us		1	en	update local bank transfer work plus slow upload start	Negative	0	1	1
Google Play Store	5fd04d41-41b1-4fcf-8485-c87200012682	The worst app i have ever used, always laggy always needs like 10 min just to log in	A.	##########	Dear Client, We are sorry to read that and we are working to improve and improve our services and products. Your satisfaction is our main goal	##########	0	en	us		1	en	bad app ever use always laggy always need like min log	Negative	1	1	1
Google Play Store	0a6f5646-56b5-4847-9def-84f550e232bd	Since the latest update, the app keeps prompting to enable GPS, even though the GPS is enabled. I am not able to access my account.	Adnan Arif	##########	Hello Dear, you have to enable GPS, then also make sure to select Fransi Mobile and go for: Precessions > Allow location detection while using the app. if you still have an issue kindly contact: 8001242121. Thanks for reaching out	##########	3	en	us		2	en	since late update app keep prompt enable gps even though gps enable able access account	Negative	0	1	0
Google Play Store	35d1e920-d026-4141-bb19-750a4076bd01	The application is laggy buggy and has horrendous UI fix this. I'm considering changing my bank to another appropriate bank.	Abdulrhman Mutiri	##########	عزيزي العميل, يؤسفنا سماع ذلك و نعمل جاهدا على تحسين و تطوير خدماتنا و منتجاتنا. رضاكم هي غايتنا.	##########	0	en	us		2	en	application laggy buggy horrendous ui fix im consider change bank another appropriate bank	Negative	0	1	1
Google Play Store	d56ec963-659e-4026-949c-ac0b70830cb5	I do not understand why app stopped working unless I provide my location!!!!!! It doesn't make any sense. How my location will help the banking service !?	Nezo Ipad	##########	عزيزي العميل, لنتمكن من مساعدتك يرجى منكم التواصل مع الدعم الفني من خلال البريد الإلكتروني FransiMobileAdmin@alfransi.com.sa تسعدني خدمتك	##########	0	en	us		1	en	understand app stop work unless provide location doesnt make sense location help bank service	Negative	1	1	0
Google Play Store	4fed4a25-4705-4eaf-b249-9c12e05c9e8d	my account not woeking	jeffrey perez	##########			0	en	us		4	en	account woeking	Neutral	1	0	0
Google Play Store	8c1b0f19-ca57-4127-874e-7939f5fb39a5	Very bad ,when trying to log in, either tells you to connect to Internet while you are actually connected or requesting to open GPS, although location is activated .	Mohammad Bafaqeeh	##########	عزيزي العميل, لنتمكن من مساعدتك يرجى منكم التواصل مع الدعم الفني من خلال البريد الإلكتروني FransiMobileAdmin@alfransi.com.sa تسعدني خدمتك	##########	2	en	us		4	en	bad try log either tell connect internet actually connect request open gps although location activate	Negative	1	1	0
Google Play Store	7aae9705-41b0-4870-882d-ee978d87e5a4	How to activate gps on the app can someone help me	Suleimann Masrii	##########	Dear customer, to assist you, please contact our support team through the following email address FransiMobileAdmin@alfransi.com.sa. We are happy to help you	##########	0	en	us		4	en	activate gps app someone help	Neutral	0	1	0
Google Play Store	5ee3a685-d9b3-47e4-8713-8370cc128022	Application not working, I'm so sad not good this fransi mobile app	Shaikh Waseem	##########	Dear customer, to assist you, please contact our support team through the following email address FransiMobileAdmin@alfransi.com.sa. We are happy to help you	##########	0	en	us		1	en	application work im sad good fransi mobile app	Negative	1	1	0
Google Play Store	14da48ea-5093-4257-a502-42182a6755db	Last 2 days I'm trying to use this app asking me to on my GPS even after I have no the GPS still not working kindly resolve this issue please	sahil shaikh	##########	Dear Client, Please update FransiMobile to the latest version. In case, you still facing any issue, kindly send it to FransiMobileAdmin@alfransi.com.sa	##########	0	en	us		1	en	last days im try use app ask gps even gps still work kindly resolve issue please	Negative	0	1	0
Google Play Store	f9a5c748-621e-40b2-aaea-c866344283a6	Slow... slow ... slow. Bad app. Updated rating( Aug 19.23)... still very slow app. Wondering not solved yet.	S M	##########	Dear Client, Please update FransiMobile to the latest version. In case, you still facing any issue, kindly send it to FransiMobileAdmin@alfransi.com.sa	##########	0	en	us		1	en	slow slow slow bad app update rat aug still slow app wonder solve yet	Negative	1	0	1
Google Play Store	ee4f2b5b-dcec-4599-8112-9a4d34697703	Difficult to log in. Always log every time you used it. And now I can't log in. Pls check your app system pls	vir j	##########	عزيزي العميل, لنتمكن من مساعدتك يرجى منكم التواصل مع الدعم الفني من خلال البريد الإلكتروني FransiMobileAdmin@alfransi.com.sa تسعدني خدمتك	##########	0	en	us		1	en	difficult log always log every time use cant log pls check app system pls	Negative	1	1	0
Google Play Store	a21310f0-1a72-4429-a5c6-fb838ae01728	One of the worst banking app ever!!! And they don't care	Ahmed Alidaroos	##########	Dear customer, We are sorry to hear that and we are working to improve and improve our services and products. Your satisfaction is our main goal	##########	0	en	us		1	en	one bad bank app ever dont care	Negative	1	0	0
Google Play Store	a0b5d2d3-691a-45fc-9b16-9d88bc706f30	Good	Anil Prajapati	2023-08-06 08:15:00	Dear customer, Thank you for your trust on BSF services. Your satisfaction is our main goal	##########	0	en	us		5	en	good	Positive	0	0	0
Google Play Store	86bb378e-5faa-4cb6-9e77-83ca57d7e2e7	Very outdated app. Weak customer experience	Ahmed ak	##########	Dear customer, We are sorry to hear that and we are working to improve and improve our services and products. Your satisfaction is our main goal	2023-08-06 05:44:00	0	en	us		1	en	outdated app weak customer experience	Negative	1	0	0
Google Play Store	37c0f250-8176-43f8-a417-dda57203b36f	Always dead	Mohammed Ameen	2023-08-01 07:43:00	Dear customer, We are sorry to hear that and we are working to improve and improve our services and products. Your satisfaction is our main goal	##########	1	en	us		1	en	always dead	Neutral	1	1	0
Google Play Store	53cb10e4-e8d4-45a0-b69b-1e21bd1f92a9	Worst Bank application , the App is frozen and can't log in almost 2 days.	Sal Gahtany	##########	Dear customer, to assist you, please contact our support team through the following email address FransiMobileAdmin@alfransi.com.sa. We are happy to help you	##########	1	en	us		1	en	bad bank application app freeze cant log almost days	Negative	1	1	1
Google Play Store	a9e4ec31-42a4-42b3-9457-e9630108e397	Have to register devices every single time. Mobile app is rendered useless after device registration update.	Abdullah Al Madani	##########	Dear customer, to assist you, please contact our support team through the following email address FransiMobileAdmin@alfransi.com.sa. We are happy to help you	##########	0	en	us		1	en	register devices every single time mobile app render useless device registration update	Negative	0	0	0
Google Play Store	afe26f0b-cec1-48b9-8618-372ae89794bd	Not working so bad 😞	Jessica Babon	##########	Hello Dear, to better assist you kindly contact Fransi Phone: 8001242121. have a good evening	##########	0	en	us		1	en	work bad	Negative	1	1	0
Google Play Store	60269274-e3c3-4424-8189-6827d61daed3	The app is unusable	Yusif Sadik	##########	Dear customer, We are sorry to hear that and we are working to improve and improve our services and products. Your satisfaction is our main goal	##########	1	en	us		1	en	app unusable	Negative	1	0	0
Google Play Store	e1cb76c9-fd29-46b4-91cc-6c8c278eb1b2	Best choice of best people's	Abdul sattarAhmed Mohammad	##########	Dear customer, Thank you for your trust on BSF services. Your satisfaction is our main goal	##########	0	en	us		5	en	best choice best people	Positive	0	0	0
Google Play Store	a7f8ae1c-6907-4e0b-9ac4-5feed58d49e3	After new update, The Application not working in my Android mobile. Motorola g73 5g. Kindly check. Once I start the app, my mobile scree continue rotating like screen rotator.	Faiyaz Ahmad	##########	عزيزي العميل, لنتمكن من مساعدتك يرجى منكم التواصل مع الدعم الفني من خلال البريد الإلكتروني FransiMobileAdmin@alfransi.com.sa تسعدني خدمتك	##########	8	en	us		1	en	new update application work android mobile motorola g g kindly check start app mobile scree continue rotate like screen rotator	Negative	0	1	0
Google Play Store	04cc66f9-63ca-4de6-8a6d-6b4f3945757d	What's wrong with the apps?.keep on rotating.	remil villanueva	##########	Dear customer, to assist you, please contact our support team through the following email address FransiMobileAdmin@alfransi.com.sa. We are happy to help you	##########	1	en	us		1	en	whats wrong appskeep rotate	Negative	0	1	0
Google Play Store	36169b13-86d0-4ef6-abab-41402e0b3758	The worest bank application in the workd Too slow and no benefits	MOHAMED SAAD	##########	Dear customer, We are sorry to hear that and we are working to improve and improve our services and products. Your satisfaction is our main goal	##########	2	en	us		1	en	worest bank application workd slow benefit	Negative	1	1	1
Google Play Store	bc5bd230-cb45-4c1d-92aa-d11572588d12	App is extreamly extreamly extreamly slow... its toooooo heavy!!! Please optimize it. I have a powerfull device 12MB Ram	Hasan AlSalman	##########	Dear customer, We are sorry to hear that and we are working to improve and improve our services and products. Your satisfaction is our main goal	##########	1	en	us		1	en	app extreamly extreamly extreamly slow toooooo heavy please optimize powerfull device mb ram	Negative	0	0	1
Google Play Store	b36ffc08-fedb-43f9-9b93-b950bb0b2443	Bad experience about this app. I can't open this app. Makes my phone misbehaving everytime i opened it	sem singcol	##########	Dear customer, We are sorry to hear that and we are working to improve and improve our services and products. Your satisfaction is our main goal	##########	1	en	us		1	en	bad experience app cant open app make phone misbehave everytime open	Negative	1	1	0
Google Play Store	e8b80ebe-3c60-480f-b438-f3f0d9e9ee34	Very bad staff for non Saudise	EngAmir Sohail	##########	مرحبا عزيزي، يمكنك تقديم ملاحظاتك بالتواصل مع مركز الشكاوى والعناية بالعملاء أثناء ساعات العمل الرسمية من خلال: داخل المملكة : 8001188880 خارج المملكة: 00966920000548 أو إرسال كامل تفاصيل المشكلة مع بيانات التواصل عبر البريد الإلكتروني: ccc@alfransi.com.sa شكرًا لتواصلك ونتمنى لك يوم سعيد	##########	1	en	us		1	en	bad staff non saudise	Negative	1	0	0
Google Play Store	ff64240b-538a-4af9-b01a-966d9107ffdc	App has some problem the authentication pop up for otp is not coming.kindly fix this. Os android 13	mohd kashif	##########	عزيزي العميل, لنتمكن من مساعدتك يرجى منكم التواصل مع الدعم الفني من خلال البريد الإلكتروني FransiMobileAdmin@alfransi.com.sa تسعدني خدمتك	2023-07-03 07:46:00	0	en	us		1	en	app problem authentication pop otp comingkindly fix os android	Negative	0	1	0
Google Play Store	4aca0057-3401-409e-979b-5907e7835445	i have very bad experience eith this app.. very slow and cannot even login.	Yasir Hameed	2023-07-02 06:16:00	Dear Client, to better assist you kindly send us an email to: FransiPhoneAdmin@alfransi.com.sa with the issue you're facing. Thanks	##########	1	en	us		1	en	bad experience eith app slow even login	Negative	1	0	1
Google Play Store	da28c8c4-a14a-4f8a-a3c5-3ec3206d4942	WORST APP EVER	faisal khan	##########	Dear customer, We are sorry to hear that and we are working to improve and improve our services and products. Your satisfaction is our main goal	##########	1	en	us		1	en	bad app ever	Negative	1	0	0
Google Play Store	cd5c65b2-a7c8-4f0f-bebe-6aa922ba3d7f	Very good service this bank	Jaweed Ch	##########	Dear customer, Thank you for your trust on BSF services. Your satisfaction is our main goal	##########	0	en	us		5	en	good service bank	Positive	0	0	0
Google Play Store	10101eec-c594-42fa-9f53-b6ce5e167671	I cannot open the app its keep rotating and I don't know why please fix your app After 1 year the same problem accured does your app have a problem with specific phones does it work only with huawei and i phone Bad customer service call this number and after they will let you to call another number wth	فاطمة كارلوس	##########	Dear client, to better assist you kindly contact fransi phone: 8001242121 so our customer service representative can look into it for you.	##########	6	en	us		1	en	open app keep rotate dont know please fix app year problem accured app problem specific phone work huawei phone bad customer service call number let call another number wth	Negative	1	1	0
Google Play Store	7d81e456-0cf8-4550-9be6-59241c73223b	The worst app i ever used, i can't log in to my account for months, i never received the authentication code, though i reinstalled the app several times, and i complained many times, so i decided to end my business with this nonhelpfull bank.	Andaleeb Murad	##########	عزيزي العميل، يؤسفنا سماع ذلك ونعمل جاهدا على تحسين وتطوير خدماتنا ومنتجاتنا. رضاكم هي غايتنا ولكي نتمكن من مساعدتك يرجى منكم التواصل مع الدعم الفني من خلال البريد الالكتروني Fransimobileadmin@alfransi.com.sa تسعدني خدمتك	##########	6	en	us		1	en	bad app ever use cant log account months never receive authentication code though reinstall app several time complain many time decide end business nonhelpfull bank	Negative	1	1	0
Google Play Store	59f25d33-fe3c-42f0-bbeb-ff042e81680a	always has an issue , screen rotating itself can't log in just delete this app fransi	Brylle jayce Celmar	##########	Dear Customer, we're very sorry to hear this, and your observation has been sent to the concerned department. Your satisfaction is our main goal.	##########	2	en	us		1	en	always issue screen rotate cant log delete app fransi	Negative	0	1	0
Google Play Store	e95e423d-5ac8-4ac5-b0be-a0a90ca6243a	Worst banking app	abodi kamal	##########	عزيزي العميل, يؤسفنا سماع ذلك و نعمل جاهدا على تحسين و تطوير خدماتنا و منتجاتنا. رضاكم هي غايتنا.	##########	0	en	us		1	en	bad bank app	Negative	1	0	0
Google Play Store	ea78b462-2cc4-4886-9b3c-8bd181d0ff3f	I have had the very worst experience with this bank, it's not about the App it's about the bad bank system, and the negligence of their system against their customers when they need them in the most critical situation while they are not there to help. While I was out of the Kingdom, my bank account for no reason converted to an inactive account, I've been calling, sending emails, and raising comp…	Issam Barakat	2023-06-05 05:19:00	Dear Customer, we're very sorry to hear this, and your observation has been sent to the concerned department. Your satisfaction is our main goal.	##########	12	en	us		1	en	bad experience bank app bad bank system negligence system customers need critical situation help kingdom bank account reason convert inactive account ive call send email raise complaints keep receive automate reply say pass branch im abroad	Negative	1	1	0
Google Play Store	2835790e-867b-40c8-b138-9bda7cc16e3f	Not working. I have contacted your support team.they were unhelpful giving me deceiving information making the customer as experimentation field.they have Givin me suggestions after suggestions without solving the problem.please repair and maintain your system	AAA AAA	2023-06-05 00:03:00	Dear customer, to assist you, please contact our support team through the following email address FransiMobileAdmin@alfransi.com.sa We are happy to help you	##########	3	en	us		1	en	work contact support teamthey unhelpful give deceive information make customer experimentation fieldthey givin suggestions suggestions without solve problemplease repair maintain system	Negative	0	1	0
Google Play Store	b155752a-527e-4577-8937-91a8d97a2b5a	Not convinient in 2023, laggy and stupid logging in.	Bader Alqahtani	##########	عزيزي العميل, يؤسفنا سماع ذلك و نعمل جاهدا على تحسين و تطوير خدماتنا و منتجاتنا. رضاكم هي غايتنا.	##########	1	en	us		1	en	convinient laggy stupid log	Negative	1	0	1
Google Play Store	b474571f-dc4b-46c4-a5d8-54c3cd5b17e4	the app is very slow, not usable such as other banks apps! So disappointed	ahmed alsomali	##########	Dear customer, We are sorry to hear that and we are working to improve and improve our services and products. Your satisfaction is our main goal	##########	0	en	us		1	en	app slow usable bank apps disappoint	Negative	1	0	1
Google Play Store	dfedba86-83a5-4f11-880e-b733eab4c57e	Worst banking app.. Never works when needed the most. I will be changing my bank soon.	aafreen investor	##########	Dear customer, We are sorry to hear that and we are working to improve and improve our services and products. Your satisfaction is our main goal	##########	0	en	us		1	en	bad bank app never work need change bank soon	Negative	1	1	0
Google Play Store	e429a5ae-417d-4600-9e2e-62946e6b03a7	Very bad App	Mohammed Hashim	##########	Dear customer, We are sorry to hear that and we are working to improve and improve our services and products. Your satisfaction is our main goal	##########	0	en	us		1	en	bad app	Negative	1	0	0
Google Play Store	f96afd9e-9e3e-49b5-951c-d4fc2248de3a	Worst Application ever So buggy and slow slow slow	Abdulrahman Al zhrani	##########	Dear customer, We are sorry to hear that and we are working to improve and improve our services and products. Your satisfaction is our main goal	##########	0	en	us		1	en	bad application ever buggy slow slow slow	Negative	1	0	1
Google Play Store	30a5d40f-cb76-4ef0-8d08-9ee6a9b28edc	very very very very very very veeeery veeeery veeeeeeeeeeeeeery veeeeeery very very very very very very very×100000000000000000 sloooooooooooooooow🤬	w m	##########	Dear customer, We are sorry to hear that and we are working to improve and improve our services and products. Your satisfaction is our main goal	##########	0	en	us		1	en	veeeery veeeery veeeeeeeeeeeeeery veeeeeery sloooooooooooooooow	Negative	0	0	0
Google Play Store	92c1feac-58c5-4bab-aa7b-fa9d60a6adac	Very slow and buggy	ABDULFATTAH ALHAZMI	##########	Dear customer, We are sorry to hear that and we are working to improve and improve our services and products. Your satisfaction is our main goal	##########	0	en	us		1	en	slow buggy	Negative	0	0	1
Google Play Store	8c686f91-6e1e-4a0d-a538-c40a6fb5cecc	App is having issues now always need to reinstall to login	Meteoroid -	2023-05-04 04:04:00	عزيزي العميل, يؤسفنا سماع ذلك و نعمل جاهدا على تحسين و تطوير خدماتنا و منتجاتنا. رضاكم هي غايتنا.	##########	0	en	us		1	en	app issue always need reinstall login	Negative	0	1	0
Google Play Store	2730a533-272f-4666-bfd8-5f23a797658e	Application taking too much time to open when comapre with other bank Application.	SYED MEER	##########	عزيزي العميل، يؤسفنا سماع ذلك و نعمل جاهدين على تحسين و تطوير خدماتنا و منتجاتنا. رضاكم غايتنا	##########	2	en	us		2	en	application take much time open comapre bank application	Negative	0	1	1
Google Play Store	15d15272-6ad7-42ac-abe5-ece85024b61e	BSF SEND VERY BAD SERVICE.	Amir Khan	##########	Dear customer, We are sorry to hear that and we are working to improve and improve our services and products. Your satisfaction is our main goal	##########	0	en	us		1	en	bsf send bad service	Negative	1	0	0
Google Play Store	15bd1048-b24a-445a-a838-349efcc714af	The app is very slow and not responsive	Yousef Algiaan	##########	Dear customer, We are sorry to hear that and we are working to improve and improve our services and products. Your satisfaction is our main goal	##########	1	en	us		1	en	app slow responsive	Negative	0	0	1
Google Play Store	8c0f650f-e7e9-426b-bc07-c1762d9e2ce5	Very good	Mark De luna	##########	Dear customer, Thank you for your trust on BSF services. Your satisfaction is our main goal	##########	0	en	us		5	en	good	Positive	0	0	0
Google Play Store	47faad49-951f-41c8-8167-a904efa95d66	After the last update, the application became very very slow	Nour Al-Rasheed	##########	Dear Customer, Thanks for rating FransiMobile application. Please download the latest version of FransiMobile application. Please if you face any issue, then you are welcome at any time to call us on 800-124-2121 OR send an email to FransiMobileAdmin@alfransi.com.sa FransiPlusAdmin@alfransi.com.sa	##########	0	en	us		1	en	last update application become slow	Negative	0	0	1
Google Play Store	696cc24c-1a0a-4de5-943f-2c043d7cf38b	Very good service and systems	rakibul hasan	##########	Dear customer, Thank you for your trust on BSF services. Your satisfaction is our main goal	##########	0	en	us		5	en	good service systems	Positive	0	0	0
Google Play Store	6812d815-8b6b-421a-b6f5-f5709a834f11	What happened to the app?!!now the app is very slow and lagging	Amr Shaker	##########	Dear customer, We are sorry to hear that and we are working to improve and improve our services and products. Your satisfaction is our main goal	##########	2	en	us		1	en	happen appnow app slow lag	Negative	0	0	1
Google Play Store	0fb39972-843a-45c7-a4d2-c0f1237953c8	Worst bank app experience honestly, needs a lot of improvements	osama Mansori	##########	Dear customer, We are sorry to hear that and we are working to improve and improve our services and products. Your satisfaction is our main goal	##########	2	en	us		1	en	bad bank app experience honestly need lot improvements	Negative	1	0	0
Google Play Store	d45b15fe-940d-4392-9082-9241270cda89	Very bad experience recently with this app, it was good before, now it is dum, i cant login easily, i should try alot to login which is meaningless	Abdelkhalek Elmansy	2023-04-09 01:07:00	Dear customer, We are sorry to hear that and we are working to improve and improve our services and products. Your satisfaction is our main goal	##########	0	en	us		1	en	bad experience recently app good dum cant login easily try alot login meaningless	Negative	1	1	0
Google Play Store	cebbf6b9-c062-4b78-9b4d-7d9cb21b87da	It gives error most of the times	Hani Ghalib Alkathiri	##########	Dear customer, to assist you, please contact our support team through the following email address FransiMobileAdmin@alfransi.com.sa. We are happy to help you	##########	0	en	us		1	en	give error time	Negative	0	1	0
Google Play Store	0c3063fb-fb14-48b8-82c2-595fc7513b6e	very very very bad app i will change my bank because of the app	شريف شاكر	##########	Dear customer, we are sorry to hear that and we are working to improve and improve our services and products. Your satisfaction is our main goal.	##########	0	en	us		1	en	bad app change bank app	Negative	1	0	0
Google Play Store	a1382841-f47d-4d7d-8aec-95c91bff6386	Always hanging and it is very slow	ahmad omari	##########	Dear customer, We are sorry to hear that and we are working to improve and improve our services and products. Your satisfaction is our main goal	##########	1	en	us		1	en	always hang slow	Negative	0	0	1
Google Play Store	083df1ac-8f5b-4d45-8396-0f47a60630a1	Very slow 🙄	Mero Al-Shareef	##########	Dear customer, We are sorry to hear that and we are working to improve and improve our services and products. Your satisfaction is our main goal	##########	0	en	us		1	en	slow	Negative	0	0	1
Google Play Store	6cdf9a69-11a2-41b1-9784-c7df2e709527	app wont let me transfer locally out of the bank	Omar Awad	##########	Dear customer, We are sorry to hear that and we are working to improve and improve our services and products. Your satisfaction is our main goal	##########	0	en	us		3	en	app wont let transfer locally bank	Negative	0	1	0
Google Play Store	cee36b59-f091-424a-9b94-70e7e2d4cc0e	Very slow and basic	Ekram Saleh	2023-03-09 01:01:00	Dear customer, We are sorry to hear that and we are working to improve and improve our services and products. Your satisfaction is our main goal	##########	0	en	us		2	en	slow basic	Negative	0	0	1
Google Play Store	3d72fbcc-f7ac-44ea-afdb-211305a88803	Very bad experience, lagging too much	Sultan Alzahrani	##########	Dear customer, We are sorry to hear that and we are working to improve and improve our services and products. Your satisfaction is our main goal	##########	0	en	us		1	en	bad experience lag much	Negative	1	0	0
Google Play Store	d03ccde4-fe36-486f-b02d-d2d806553265	Very slow, the worse App I've ever tried	A-Sport	##########	Dear customer, thank you for your suggestion and we will raise it to the concerned department.	##########	0	en	us		1	en	slow bad app ive ever try	Negative	1	0	1
Google Play Store	3abff465-75f0-45e0-ac0c-a241f3809602	Recently the app is lagging alot. I have very stable and best speed internet. All apps including apps for other banks are working fine.	Muhammad Haris	##########			15	en	us		2	en	recently app lag alot stable best speed internet apps include apps bank work fine	Neutral	0	0	0
Google Play Store	0f019f0b-08e3-45ad-8fa7-b73c854bfd98	No hustle great	Tats Mariano	##########			0	en	us		5	en	hustle great	Negative	0	0	0
Google Play Store	8d6ac7c6-16b5-4e41-8d0c-ad14cf1da037	The app is very and extremely slow, try to learn from Alrajhi bank or SABB	Hejji Juraysh	##########			0	en	us		1	en	app extremely slow try learn alrajhi bank sabb	Negative	0	0	1
Google Play Store	e09d8895-bc24-4735-b4e0-d808d08aff72	Nice app	Khalid Alali	##########			0	en	us		5	en	nice app	Positive	0	0	0
Google Play Store	dfd7fb74-4252-46df-b7db-3852e7f4c014	Keeps getting better slowly but its still sluggish and using fingerprint verification is a hassle.	Samer Alsourani	##########	عزيزي العميل، نشكرك على تقييم البرنامج. ونعتذر لهذا الخطأ الفني. الرجاء المحاولة مرة أخرى وفي حال لم تحل مشكلتك، الرجاء ارسال صورة من الشاشة للبريد الإلكتروني FransiMobileAdmin@alfransi.com.sa أو FransiPlusAdmin@alfransi.com.sa في حال رغبتك بالاتصال بك، الرجاء اضافة رقم هاتفك الجوال عند ارسالك الايميل	##########	1	en	us		3	en	keep get good slowly still sluggish use fingerprint verification hassle	Negative	0	0	1
Google Play Store	0974fa0d-ed97-4e3b-828d-8f8b248927d4	sooo soooo slow to do anything. the only fasted action is when u hit logout by mistake. The rest is soooooo sooooo slow	Syed Mohammed Mehdi	##########			2	en	us		1	en	sooo soooo slow anything fast action u hit logout mistake rest soooooo sooooo slow	Negative	0	0	1
Google Play Store	a0a028f4-a02d-4bbe-aca6-a9cde92c663f	Good	Majid Sulaiman	##########			0	en	us		4	en	good	Positive	0	0	0
Google Play Store	b86e5141-13e5-4bf1-9576-54f32c401ae0	Very good application thanks And very good fast	M Rehan afzal	##########			0	en	us		5	en	good application thank good fast	Positive	0	0	0
Google Play Store	ab150907-4445-42cd-9c1d-02e2918b2e8b	The quality of this bank and its services like FransiMobile is shockingly bad. The app is almost nonfunctional. It is shameful.	S Lyttl	2023-02-08 08:32:00			7	en	us		1	en	quality bank service like fransimobile shockingly bad app almost nonfunctional shameful	Negative	1	0	0
Google Play Store	eeb86abf-473b-479a-80ca-a0dc09d63e3b	Not fully optimized for Android, it looks out dated not iphone silly old design	Fahad Al-Garni	2023-02-03 00:44:00			2	en	us		2	en	fully optimize android look date iphone silly old design	Negative	1	0	0
Google Play Store	91fc6699-8343-4dd4-96da-6a7cb0248b5f	Not sending OTP.	Monique Gabriel	##########			0	en	us		1	en	send otp	Negative	0	1	0
Google Play Store	6847f48c-1574-4b02-86b3-a5cee93a906c	Not the best interface and slow to load but does the job eventually.	Maz Ka	##########			0	en	us		4	en	best interface slow load job eventually	Negative	1	1	1
Google Play Store	292743cb-a664-402a-abb2-3b7981dd0570	Bad experience	Munavar Firoz	##########			0	en	us		1	en	bad experience	Negative	1	0	0
Google Play Store	85511c90-6ee5-4dcd-b3e8-c03d8e97c938	My ATM card date got expired and they sent me anumber to call for my ATM update and l tried to call the but was on no service. And am so hungry I can't withdraw my money. and i couldn't get any help. So disgusting	David Hafizu	##########			0	en	us		3	en	atm card date get expire send anumber call atm update l try call service hungry cant withdraw money couldnt get help disgust	Negative	0	1	0
Google Play Store	94ffcac9-597f-4fc3-87ed-04398eb68348	It's very easy to use	Idrees Malik	##########			0	en	us		5	en	easy use	Positive	0	0	0
Google Play Store	449fc891-7050-4a86-baf4-555e35b43fac	Using FransiMobile app for a decades	Auwalu Ali	##########			0	en	us		5	en	use fransimobile app decades	Neutral	0	0	0
Google Play Store	ef3f55e3-d8d5-4c4a-a623-666ba27b1e9d	Not working. Tried to update and activate it many times but without any response	Nareman Afeef	##########			2	en	us		3	en	work try update activate many time without response	Negative	0	1	0
Google Play Store	60901481-4a57-4555-aa6e-942f4ab8e24b	ITS NOT WORKING!!! You cant even login	Abdulaziz	##########			0	en	us		1	en	work cant even login	Negative	0	1	0
Google Play Store	f92a0cab-b593-4127-9a97-ed864f2367f3	This app is SO SLOW! Every time you click on something, the fransi logo goes around for 5-10 seconds before the next page loads. Literally takes over 5 minutes just to make one transfer. They need to speed up the loading of pages and reduce the number of pages you have to click through in order to make a payment or a transfer or use any service.	Ahmed Gul	##########			8	en	us		1	en	app slow every time click something fransi logo go around second next page load literally take minutes make one transfer need speed load page reduce number page click order make payment transfer use service	Negative	0	0	1
Google Play Store	fbfc11e1-ee8a-41a1-9874-78877f6a8e08	Sir my Fransi mobile App is not same like before now what is this how can Unregistered explain me what is this Card pin	Mohd Ahmad	##########			0	en	us		1	en	sir fransi mobile app like unregistered explain card pin	Negative	1	0	0
Google Play Store	a67133d4-1d44-4d4c-a607-403ea9a7858f	Very bad 👎	Ahmed Mahmoud	##########			0	en	us		1	en	bad	Negative	1	0	0
Google Play Store	3c6a766b-578a-4773-b962-faaab6bf76f9	The app was good. Last month, got forced to update it.. since last month the app is neither updating nor re-installing.. quick help	Chrystal Ocean	##########			0	en	us		2	en	app good last month get force update since last month app neither update reinstall quick help	Negative	0	1	0
Google Play Store	68fc5091-8a69-40f1-b5d2-583bd5f22903	Good	Arslaniftikhar Muhammad	##########			0	en	us		5	en	good	Positive	0	0	0
Google Play Store	0165913b-1e3e-4b4c-a3a5-97c7ae30c6ff	It's to much slowly open.. not work fast this app.. But in app service all was good	Mazhar Malik	##########			0	en	us		4	en	much slowly open work fast app app service good	Negative	0	0	1
Google Play Store	408a6701-b693-4d48-9cbd-fe7ec4869004	Good service	shabeer ajuwa	##########			0	en	us		5	en	good service	Positive	0	0	0
Google Play Store	ea95ae41-713a-4faf-9c33-587b83772632	Good apps	Felomina aquino	##########			0	en	us		5	en	good apps	Positive	0	0	0
Google Play Store	f081b2ad-1278-4620-b486-663406de6846	Even after downloading the latest version it says to download the latest version.	Abrar Ahmed	##########			0	en	us		3	en	even download late version say download late version	Neutral	0	1	0
Google Play Store	e3f206b8-611f-4080-939d-fde593aceb9e	Can't even log in , it keep telling me Error	Chibi Raneem	##########			0	en	us		1	en	cant even log keep tell error	Negative	0	1	0
Google Play Store	7c3687ce-1956-4fff-bee5-67089544f8ac	Excellent	Rommel Dominguez	##########			0	en	us		5	en	excellent	Positive	0	0	0
Google Play Store	ea0c7147-b950-40f8-935c-e179d4a10940	Why not open , very bad	Abbas Kanbar	##########			1	en	us		5	en	open bad	Negative	1	1	0
Google Play Store	992cdb59-d7b5-4089-bc69-ef5a7ca07cb4	This is fantastic app. It covers almost all requirements of internet banking. I love it	Ahmed Imran	##########			0	en	us		4	en	fantastic app cover almost requirements internet bank love	Positive	0	0	0
Google Play Store	709f2490-e019-44cd-bfc6-b7175389454f	Am satisfied For the service of saudi fransi bank.	Nelson Bernal	##########			0	en	us		5	en	satisfy service saudi fransi bank	Positive	1	0	0
Google Play Store	fa2bd6c6-330c-4c94-b204-fa1d7ebd433f	Very nice but international transfer fee is too much	shamim faruque	##########			0	en	us		5	en	nice international transfer fee much	Neutral	1	0	0
Google Play Store	06e3b9b5-3054-4446-84ab-ae1bb74e54bb	Doesn't work from beginning!	Incisive	##########			0	en	us		3	en	doesnt work begin	Negative	0	1	0
Google Play Store	937e9d3f-d6ac-46b7-a139-24dc15266fd6	Been a customer for more than 20 years this one of the worst banks cancelling my account	Salah Ali	##########			0	en	us		1	en	customer years one bad bank cancel account	Negative	1	0	0
Google Play Store	d4f0a7b6-3664-47df-bc8f-23f6af55b7c8	Calling bad would be bad they worst than bad today all off sudden my card was suspended without any reason when I called the customer care a very rude lady answered she thinks that we expat are their slaves	Anawar Sadrath	##########			0	en	us		1	en	call bad would bad bad bad today sudden card suspend without reason call customer care rude lady answer think expat slave	Negative	1	1	1
Google Play Store	2bd53b03-4606-4657-8ca0-4ae24cf5b3a5	Local bank I can't transfer bad service	Azhar khan	##########			0	en	us		2	en	local bank cant transfer bad service	Negative	1	1	0
Google Play Store	cc08eba0-8d2c-4c2c-88f8-0c970c544541	Poor application	Aqeel Alkhalifa	##########			0	en	us		1	en	poor application	Negative	1	0	0
Google Play Store	b0af2b04-6c26-4951-87fb-f5b6536084fe	Fransi super 👍👍	md soykat khan	##########			0	en	us		5	la	fransi super	Positive	0	0	0
Google Play Store	034aff09-2230-4242-9eb3-d312706658b6	worst banking app..i could never sign in..	Farukh Ali	##########			0	en	us		1	en	bad bank appi could never sign	Negative	1	1	0
Google Play Store	e9159166-71d2-4d36-860a-cdda5428045d	It's all good but the international transaction takes too long like 5 to 7 days and they ask for 50 SAR transaction fee for it, way expensive for a slow transaction. Please do something about this .	Maria Soberano	2022-09-05 09:00:00			1	en	us		3	en	good international transaction take long like days ask sar transaction fee way expensive slow transaction please something	Negative	1	0	1
Google Play Store	211c3c76-a34e-4801-9708-415059eb6d01	Facing all the time connection problems	Ahmad Al atrouni	##########			0	en	us		1	en	face time connection problems	Negative	0	1	0
Google Play Store	24019419-b11e-463c-8215-fb19160b0358	Satisfied	REY JAMES BELEN	##########			0	en	us		5	en	satisfy	Positive	0	0	0
Google Play Store	47406b72-ad7c-46c4-b612-84361bc5b30c	Very nice application nd easy to use	Abdullah Dar	##########			0	en	us		5	en	nice application nd easy use	Positive	0	0	0
Google Play Store	7b54bc99-5dd7-41cb-bcb0-821262c189dd	After updating the application now its not woking I couldn't login to the application worse update ever, what is the benefit from the apdate? Please fix it	Motaz Qabah	2022-08-09 07:00:00			0	en	us		1	en	update application woking couldnt login application bad update ever benefit apdate please fix	Negative	1	1	0
Google Play Store	37ee7cc7-f82f-4417-aa8f-f04e1cc56224	Good	Q-X-D 47	##########			0	en	us		5	en	good	Positive	0	0	0
Google Play Store	82552e57-6f3e-4edd-a1be-ed68eabedf5f	Worst service in the history of Banks no one reply on customer services no satisfaction May be they're sleeping on Jobs like seriously upgrade your skills of your customer representatives. Even calling on landline or mobile no benefit all they do is just wait pateintly since 4 months same thing keep calling them no benefit poor service.	Amir Mįr	##########			0	en	us		1	en	bad service history bank one reply customer service satisfaction may theyre sleep job like seriously upgrade skills customer representatives even call landline mobile benefit wait pateintly since months thing keep call benefit poor service	Negative	1	0	0
Google Play Store	40d389d2-ccce-4580-92d7-e8c96b11f470	The worst doesn't open	Dr.Mesaad Bahatheq	##########			1	en	us		1	en	bad doesnt open	Negative	1	1	0
Google Play Store	ebe14294-aefa-40a4-8499-4e07b22f094b	Not working and no updates?!	manal andijani	##########			0	en	us		3	en	work update	Negative	0	1	0
Google Play Store	ed85b1dc-e880-478c-b429-451d140a3c5f	can't login any more	Khalid Al-Ghamdi	##########			0	en	us		1	en	cant login	Negative	0	1	0
Google Play Store	ba5a224b-b655-41e3-aaad-e364f57a86ec	Excellent	Bakht Rawan Wardag	##########			0	en	us		5	en	excellent	Positive	0	0	0
Google Play Store	b890c802-d0a9-4e44-9bd3-1c6c3d603516	I couldnt lig my account the sms password not come to me	Mria Jacob	2022-06-07 07:22:00			1	en	us		1	en	couldnt lig account sms password come	Negative	0	1	0
Google Play Store	0ed18247-c53c-44de-b917-612bc5984745	Nice 👍	sham abbas	##########			0	en	us		5	en	nice	Positive	0	0	0
Google Play Store	004b81ca-d7ee-4914-8639-77edf09c33b3	I used to use this application. But after last updating i couldn't it says "too many devices, remove some or all registered"	Sam Not	2022-06-03 01:18:00			0	en	us		1	en	use use application last update couldnt say many devices remove register	Negative	0	1	0
Google Play Store	17494265-9551-4223-ba97-96ceee2bcedf	Very good experience	Othman Alwashmi	##########			0	en	us		5	en	good experience	Positive	0	0	0
Google Play Store	3c8e62f6-46c7-4901-9893-249a573407d5	App hangs. Problem with login. No answer from support after many times trying to contact.	Krystian Zupa	##########			2	en	us		1	en	app hang problem login answer support many time try contact	Negative	0	1	1
Google Play Store	484bedf7-b902-406f-9d9d-f5596c267c56	Great	Krisrey Reyes	##########			0	en	us		5	en	great	Positive	0	0	0
Google Play Store	ee47bf87-9b20-4e52-bbec-178c2e902cae	Very good app	Ziyad Abdul Rahiman	##########			0	en	us		5	en	good app	Positive	0	0	0
Google Play Store	be1fb223-89f3-40a3-83f5-415dde862222	Op	Zaid 1	##########			0	en	us		5	nl	op	Neutral	0	0	0
Google Play Store	351e012f-7414-4329-8687-009a37ed3560	It was a very good application, but for the last few months it became very slow and lagging most of the time you need to repeat the action more than twice	Mostafa Hussein	##########			0	en	us		3	en	good application last months become slow lag time need repeat action twice	Negative	1	0	1
Google Play Store	8cab9235-b9c3-490c-96ef-625b899137b1	I was using this app for a long time and faced no trouble. But suddenly mid of last month, when I tried to login, it says "too many devices registered, remove some or all from settings." But the problem is, I dont see any option to do that. Please help!	Charles ADMS	2022-05-09 08:14:00			17	en	us		3	en	use app long time face trouble suddenly mid last month try login say many devices register remove settings problem dont see option please help	Negative	0	1	0
Google Play Store	44c46dd7-2064-43b0-8567-f53f46d12758	Mostly not working on time	Anwar Ali	##########			1	en	us		1	en	mostly work time	Negative	0	1	0
Google Play Store	2d19fab5-3a26-46d7-9262-dbfa22e0b319	Very bad developers. Not working on samsung fold 3 expanded screen after the last application update. Many days have passed since this problem appeared but until now no solution.	Abdul Mohsin Nawaz	##########			4	en	us		1	en	bad developers work samsung fold expand screen last application update many days pass since problem appear solution	Negative	1	1	0
Google Play Store	64014708-c254-47ab-8905-da841e7f1c8e	Very good app.	Qaiser Awan	2022-05-06 08:58:00			0	en	us		5	en	good app	Positive	0	0	0
Google Play Store	57a3cb8a-0d4f-410e-97c2-3e8f9a57817f	Excellent app.thanks	abeer mahran	2022-05-02 08:09:00			0	en	us		5	en	excellent appthanks	Positive	0	0	0
Google Play Store	bd182574-d42e-429f-99c1-53b8f81c479d	excellent	bikesh Dhakal	##########			0	en	us		5	en	excellent	Positive	0	0	0
Google Play Store	bbc0f94e-1b8f-4d38-b986-b893e80f7795	The latest update is not even opening. Been trying for more than 3 days now. Clear the bug ASAP	tamil Superhero	##########			0	en	us		3	en	late update even open try days clear bug asap	Negative	0	1	0
Google Play Store	65a8f4e3-6908-4464-98ee-bdae84d60ede	Everything is fine but need more simpler method to recharge phones & other services ...	Azs Ele	##########			0	en	us		4	en	everything fine need simple method recharge phone service	Neutral	1	0	0
Google Play Store	8c83faac-74f4-45fa-b5c4-e5965a685753	Good	Md Abubokor Siddik	##########			0	en	us		5	en	good	Positive	0	0	0
Google Play Store	7d763f52-83de-47c7-808d-d352ede123cc	The last update so badly the application not working	Ayman Aljafare	##########			1	en	us		1	en	last update badly application work	Negative	0	1	0
Google Play Store	2e927f2a-a604-487b-896a-1099b29f4a97	Very worst app i ever seen, Try to do better for ease use customer	tamil vanan	##########			0	en	us		1	en	bad app ever see try good ease use customer	Negative	1	0	0
Google Play Store	2cfccff5-edeb-4a1f-9c30-d44c475378be	It's must be update It's doesn't work I can't log in in my account	Majed Mae	##########			0	en	us		2	en	must update doesnt work cant log account	Negative	0	1	0
Google Play Store	825e8155-d111-4e3e-abfb-7003e3f49993	Easily accessible flexible	money mani	##########			0	en	us		5	en	easily accessible flexible	Positive	1	0	0
Google Play Store	0cc51d16-ac0b-40af-8438-0bd6b14e19a4	Best Banking in the world	Noorulbasar kalabat2020 mazeed kheil	##########			0	en	us		5	en	best bank world	Positive	0	0	0
Google Play Store	dcb11a90-4c96-48fa-afb8-b8559ff36966	Not working since the last update. I am not able to sign into my bank account. Extremely frustrating!	Ream Amry	##########			3	en	us		1	en	work since last update able sign bank account extremely frustrate	Negative	1	1	0
Google Play Store	b8767af1-9681-4a19-928c-07048975ec68	Update is applicable for iphone users only..not working on android...before its fast and easy. Now cannot log in..cant even download an update for android...	Norman James Tiburcio	##########			1	en	us		1	en	update applicable iphone users onlynot work androidbefore fast easy log incant even download update android	Negative	0	1	0
Google Play Store	30dfa589-327f-4afe-9ee4-7a0c089fba37	Nice	Subtain Bashir	##########			0	en	us		5	en	nice	Positive	0	0	0
Google Play Store	034a0a4b-3533-48c7-bd35-34b2371c43a5	Very pleasant	Faisal Alsaddik	##########			0	en	us		5	en	pleasant	Positive	0	0	0
Google Play Store	07cb84ce-abdb-4400-8f93-4665eb684e47	After update the app, my account is locked. Can't use fingerprint, SMS and fast login. Even I already follow on unlock methods and received SMS code to unlock, the account still locked.	Deni Jungjunan	##########			2	en	us		1	en	update app account lock cant use fingerprint sms fast login even already follow unlock methods receive sms code unlock account still lock	Negative	0	1	0
Google Play Store	9985d01e-4d3d-4b7f-b24d-e20c2a66ebae	Great experience	ola Alammari	##########			0	en	us		5	en	great experience	Positive	0	0	0
Google Play Store	50395c09-2656-4fab-ac6a-38d0b5438cd9	Soo bad app	Mohamed Hasan	##########			0	en	us		1	en	soo bad app	Negative	1	0	0
Google Play Store	599996ac-ed3b-4693-8a5a-62fc1d1ed17a	The last update is a downgrade, so basic user interface 🤷. But this update is good. The user interface background is awesome. And you can hide you finances too. 👌	Aria Larin	##########			1	en	us		5	en	last update downgrade basic user interface update good user interface background awesome hide finance	Positive	1	0	0
Google Play Store	88443ca9-6ce0-45fe-bb02-5cd79f532f0d	Good this apps	Edilberto Deguia	##########			0	en	us		5	en	good apps	Positive	0	0	0
Google Play Store	94d00e53-4a67-4ed5-aa25-cde04d937232	Bad application for daily use... waste of time	Nahar Ahmad	##########			1	en	us		1	en	bad application daily use waste time	Negative	1	0	1
Google Play Store	995b73f6-581e-41cd-bbb8-db151184488c	Very bad, after update the new version, still showing need to update	Arun Prathapan	##########			1	en	us		1	en	bad update new version still show need update	Negative	1	0	0
Google Play Store	85336b02-e818-4631-9939-faa735fdd4e8	Good	saeed24 alhaj	##########			0	en	us		5	en	good	Positive	0	0	0
Google Play Store	12d0e879-a420-4412-8606-fecbef111317	New app is useless after update it's not working at all. Even after the update it shows download the update.	parvez saldurkar	##########			1	en	us		1	en	new app useless update work even update show download update	Negative	1	1	0
Google Play Store	67dce43d-c355-4aa9-9be7-72702550a5c4	Ramadan update doesn't work	Jassim	##########			0	en	us		1	en	ramadan update doesnt work	Negative	0	1	0
Google Play Store	646335cc-cb89-4b6a-b9c2-6fa6c76a553c	Not work	Mahmoud Adil	##########			0	en	us		1	en	work	Neutral	0	1	0
Google Play Store	76462823-a4b7-4809-aa37-be4f37a60293	I already download the latest version then again showing download the latest version. Now I cannot open my apps or my account.	ARSHAD MANIK	##########			2	en	us		1	en	already download late version show download late version open apps account	Negative	0	1	0
Google Play Store	ad0f9a02-ea98-4ff2-8689-94e73ae7e169	Since I updated the software it doesn't work at all	Naveed Ahmed	##########			1	en	us		1	en	since update software doesnt work	Negative	0	1	0
Google Play Store	67c28546-7bdd-4479-bc2c-397e4ae629ce	Last updation on 22nd Apr 2022....👎👎👎👎. Now the App not responding	Sujith Deepu	##########			0	en	us		1	en	last updation nd apr app respond	Negative	0	1	0
Google Play Store	4f77b73b-dd9d-4556-8d8b-a75900a3c481	Poor design and implementation. Always have some issues to login . Even though I have the latest version still saying to download latest version . Just like the bank very careless	SHUHAIB AREEKKAN	##########			2	en	us		1	en	poor design implementation always issue login even though late version still say download late version like bank careless	Negative	1	1	0
Google Play Store	37b4b85e-1a98-41ff-b213-c1074ab2ba65	Worst App	Mohammed Abdul Samed	##########			0	en	us		1	en	bad app	Negative	1	0	0
Google Play Store	be29c23d-7963-4b32-80ce-2d1a1d07bb7c	Last update does not work	Ahmad Harb	##########			0	en	us		1	en	last update work	Negative	0	1	0
Google Play Store	84c58334-ff02-4325-80d0-ad4cdff56ec0	Since update i cannot login please solve it as soon as possible the worst update ever	Ali Hamade	##########			0	en	us		1	en	since update login please solve soon possible bad update ever	Negative	1	1	0
Google Play Store	b0bf366b-13d5-49d2-a993-cabfcc8cb2a6	It is even worse after the update	Othman Amodi	##########			0	en	us		1	en	even bad update	Negative	1	0	0
Google Play Store	76fae42e-b73c-4fdc-b00a-99352f9c8398	Since last update I can't login in ....	Abed Alharbi	##########			0	en	us		5	en	since last update cant login	Negative	0	1	0
Google Play Store	1287cce2-f3dc-4692-b1be-4eff6ae49c6a	Nice app , but after latest update cant acces through finger print.... Saying we have reached maximum divice...	fasal kpm	##########			0	en	us		3	en	nice app late update cant acces finger print say reach maximum divice	Negative	1	1	0
Google Play Store	a1ed18b6-85c0-4d1d-8523-56a92f858992	Can't say until use it	Mohammed Wajid razzaq	##########			0	en	us		2	en	cant say use	Neutral	0	1	0
Google Play Store	59f29d48-609e-4977-ab84-b3aa9956a76b	Nice App easy to use	Mohammed Wajid Ali Khan Khan	##########			0	en	us		5	en	nice app easy use	Positive	0	0	0
Google Play Store	2736f907-49cf-46f3-b8c0-a6ca0bcfbba3	Worst banking app	AR Afridi	##########			0	en	us		1	en	bad bank app	Negative	1	0	0
Google Play Store	8d0fa0df-3010-4dd6-a496-b32889841697	Good	Anwer Anwer	##########			0	en	us		5	en	good	Positive	0	0	0
Google Play Store	d1c44ce6-c39c-4fd9-91cc-d49c84c5ce7a	Very bad update won't even let me log in	Ishaag Hawsawi	##########			0	en	us		1	en	bad update wont even let log	Negative	1	1	0
Google Play Store	85346963-fa79-469a-abc1-d41668226b7f	Can't access my account and login after updating the app to the latest version!!	Ahmed Alkhamairi	##########			1	en	us		1	en	cant access account login update app late version	Negative	0	1	0
Google Play Store	4e3a1dea-0c17-4b67-bb32-42934ca1463b	Excellent aap	rid man do	##########			0	en	us		4	hi	excellent aap	Positive	0	0	0
Google Play Store	2bf6874f-0ad2-4198-ae14-55925eb57c11	I did updated the application, and it wont open or log in keeps asking to updated even after updating!!!	haya kab	##########			2	en	us		1	en	update application wont open log keep ask update even update	Negative	0	1	0
Google Play Store	1c9f6431-50e6-4193-8319-b02b17b04196	Does not work 😠	wajdi khalil	##########			0	en	us		1	en	work	Negative	0	1	0
Google Play Store	68bc63ed-fb67-4767-abba-a5eab6903080	Ok	Fawad khan	##########			0	en	us		5	en	ok	Positive	0	0	0
Google Play Store	08e2eeeb-46dd-4269-80dd-480375ce602f	Seems to have a problem with the latest update, i can't log in anymore. Previous versions were fine, though a delay in receiving the OTP on the recent one. Please fix ASAP, i can't log in on the app.	Maricel Elisterio	##########			1	en	us		3	en	seem problem late update cant log anymore previous versions fine though delay receive otp recent one please fix asap cant log app	Negative	0	0	1
Google Play Store	541d3428-f25f-4142-88fc-a58dcaee71a6	Very good service thank you suadi fransi	Muhammad Naeem Muhammad Alam	##########			0	en	us		5	en	good service thank suadi fransi	Positive	0	0	0
Google Play Store	9cd6b04c-920b-4b13-81c4-143512383068	i cant even open the application now! it started when i updated the app!	Jessieca Orosco	##########			3	en	us		1	en	cant even open application start update app	Negative	0	1	0
Google Play Store	b3683aeb-158a-4ea1-8c2c-cb3337d63a53	Once you update it to improve the service you get many many troubles with this app	Ahmed Alshami	##########			2	en	us		1	en	update improve service get many many trouble app	Negative	1	0	0
Google Play Store	53f41ec6-8b9c-4d67-9726-4638be343812	App is not working after last April updates	Nizar Alam	##########			0	en	us		1	en	app work last april update	Negative	0	1	0
Google Play Store	005f68c7-fa92-4f02-bfe2-9a546dace059	Very bad too many glitches	Opulence	##########			0	en	us		1	en	bad many glitches	Negative	1	1	1
Google Play Store	d51c7c87-7737-4f1e-a118-330515142b9e	Since 3 - 4 days appreciation not working !!! I an in a big trouble because of you unstable Ramadan update !!!!!!??????	Bilal Alsafi	##########			0	en	us		1	en	since days appreciation work big trouble unstable ramadan update	Negative	1	1	1
Google Play Store	e17c6361-44ce-4189-9dab-022169c3b108	Can't log in ,and gives message that I should log out from other devices while I already has one device	Mostafa Jalal	##########			0	en	us		1	en	cant log give message log devices already one device	Negative	0	1	0
Google Play Store	f70e4b08-7f82-4def-95a3-061bbda49282	The last update is a disaster. The log in page is not showing anyone....please do something about it	Mohamad Fawaz	##########			0	en	us		1	en	last update disaster log page show anyoneplease something	Negative	0	1	0
Google Play Store	910d6027-4116-4530-9e85-baea6b886269	Dear Client, you reached to the maximum allowed devices, please go to setting to delete one of the device or all devices which have enabled this service please help	HANIFA	##########			1	en	us		3	en	dear client reach maximum allow devices please go set delete one device devices enable service please help	Neutral	0	1	0
Google Play Store	40dc1c70-68ee-4c98-948d-9601063fd12c	The app is not working with Samsung fold	Ghassan Al-Masry	##########			1	en	us		1	en	app work samsung fold	Negative	0	1	0
Google Play Store	629e647b-3ded-4962-96ac-1ee96ca888fe	You have a very stupid update I cannot describe how stupid it is I cannot have an access to my account this application is dumbYou have a very stupid update I cannot describe how stupid it is I cannot have an access to my account this application is dumb	Fast Angel	##########			0	en	us		1	en	stupid update describe stupid access account application dumbyou stupid update describe stupid access account application dumb	Negative	1	1	0
Google Play Store	85f59754-b8d2-419a-917e-6817a2e2a5d3	OMG! This is going down hill fast ! It used to be a practical and fast app. Now it's slow, bulky, unresponsive, and stops working all of a sudden. Reflects badly on the whole Fransi Bank. Fail.	Jay M	##########			24	en	us		1	en	omg go hill fast use practical fast app slow bulky unresponsive stop work sudden reflect badly whole fransi bank fail	Negative	1	1	1
Google Play Store	62052244-7dcc-455e-bbc9-f40055c0b097	After last update i can't access my account i can't do anything the app is useless now	Shaheen Ahmad	##########			3	en	us		1	en	last update cant access account cant anything app useless	Negative	0	1	0
Google Play Store	6754f71b-4be6-491f-b2d1-f6b2ad873755	Doesn't work. Used to be bad but at least it worked then, now it doesn't even work	Misha Alei	##########			3	en	us		1	en	doesnt work use bad least work doesnt even work	Negative	1	1	0
Google Play Store	d44c4b15-a209-4037-863b-ccb8fb7306e3	Since the last update..I Can't use the application to login anymore.. Always a delay in the OTP..I keep sending request for it without any reply.	amr alamy	##########			21	en	us		1	en	since last updatei cant use application login anymore always delay otpi keep send request without reply	Negative	0	1	1
Google Play Store	3fa97c1c-3ac7-474f-b706-3f77e381863e	jeeps loading forever	Ruqa Shehab	2022-04-07 00:53:00			0	en	us		1	en	jeeps load forever	Neutral	0	1	1
Google Play Store	5cf28944-1e14-46e9-a09d-152dd1d01c78	Most useless banking app in my experience. It doesn't work when you need the most. Further it has problems working on Mobily network, but on STC it's OK (only if it works). The UI is a mess, keeps changing every few days making it more difficult to use for a layman. Most annoying part is the bank servers are too busy to even login during the beginning of every month. I can list more downsides tha…	Syed Abdul Waheed	##########			54	en	us		1	en	useless bank app experience doesnt work need problems work mobily network stc ok work ui mess keep change every days make difficult use layman annoy part bank servers busy even login begin every month list downsides benefit im stick bank coz company use else id switch	Negative	1	1	0
Google Play Store	9f3bf866-7e92-4b1f-93c2-4d770ab5ce93	Great app. Has all the features you need and is easy to use.	Kepitano Ahmad	##########			0	en	us		5	en	great app feature need easy use	Positive	0	0	0
Google Play Store	b5b3d288-1bc6-4d4f-90d0-a197742b9012	Worst app ever	Fahad Alrashdi	##########			0	en	us		1	en	bad app ever	Negative	1	0	0
Google Play Store	995c95ed-c4b3-4fb8-8859-064ee309e736	It's good . You can make all types of transactions , money transfers and bill payment . However, sometimes it crashes . Like now I don't receive an SMS to log in	Ali Salih	##########			1	en	us		3	en	good make type transactions money transfer bill payment however sometimes crash like dont receive sms log	Neutral	1	1	0
Google Play Store	a6b40b76-b67b-447b-bde9-ee988c09d79c	It's not working 😄 it's useless	faisal m	##########			0	en	us		1	en	work useless	Negative	1	1	0
Google Play Store	2f1b494e-e389-457f-94b4-c34fa12423ac	Not everyone knows arabic please upgrade your languages😡	Skylate Minyikha	##########			0	en	us		1	en	everyone know arabic please upgrade languages	Negative	0	1	0
Google Play Store	81e84ac0-bda1-4668-a44d-256489b34e4c	Since last update i can't login to my account properly. Sometimes it takes alot of time to let me in sometimes it doesn't let me in at all.	Turki Saadi	##########			1	en	us		1	en	since last update cant login account properly sometimes take alot time let sometimes doesnt let	Negative	0	1	1
Google Play Store	d789542c-cc47-4c67-97f7-76adf673de89	Cannot sign in and use the app	ALI ANTAR	2022-04-04 05:48:00			0	en	us		1	en	sign use app	Neutral	0	1	0
Google Play Store	d283492b-21e8-4025-98f0-72d2834f490e	Send me my my profile	Afrah Akbar	##########			0	en	us		2	en	send profile	Neutral	0	1	0
Google Play Store	540ce459-7b00-4fbf-8155-97e93ed994c1	It is good bank very nice	rene genilza	##########			0	en	us		5	en	good bank nice	Positive	0	0	0
Google Play Store	e4e80c93-b380-40cf-ad76-6d959c41523f	Very bad experience not open even my credentials are correct....	Mudassar Saeed	##########			0	en	us		1	en	bad experience open even credentials correct	Negative	1	1	0
Google Play Store	efb8faf0-cd0b-45d2-a841-af2db3be6ae2	Absolute trash of an application im sorry to say it just doesn't work.	Rafeh Hashmi	##########			0	en	us		1	en	absolute trash application im sorry say doesnt work	Negative	1	1	0
Google Play Store	0222612b-5a6f-4228-be4d-637447372b71	Best bank App phone	mona kh	##########			0	en	us		5	en	best bank app phone	Positive	0	0	0
Google Play Store	95155281-4b3a-4e65-ad11-887b22b9716c	Excellent	Malik Muarrij	##########			0	en	us		5	en	excellent	Positive	0	0	0
Google Play Store	1b3f63b6-bff3-48b3-9c3b-2a09c434a0de	It is bad app . It should be more creative like other applications of Saudi Banks. There are alot of errors and alot of pending.	Mohammed Alalawi	2022-02-06 08:34:00			2	en	us		1	en	bad app creative like applications saudi bank alot errors alot pending	Negative	1	1	0
Google Play Store	26860355-9b6e-4d8c-9dcc-42f688f44ea6	What a big disappointment Application is not functioning at all	Nouroo	##########			0	en	us		1	en	big disappointment application function	Negative	1	1	0
Google Play Store	e0303ab8-faac-4fa2-a518-d59488704948	Can't log in and says wrong atm card no.	Als als	##########			1	en	us		1	en	cant log say wrong atm card	Negative	0	1	0
Google Play Store	8cc0aedc-b23c-44a1-9fd7-7e9a34e15c7f	Very poor app	MOHAMMAD S. KHAN	##########			0	en	us		1	en	poor app	Negative	1	0	0
Google Play Store	c2c90b68-c68f-4a2b-9835-36e9ea6cc83e	The app very slow.	Mohammed K.N	##########			0	en	us		2	en	app slow	Negative	0	0	1
Google Play Store	5192602a-7e48-4cc7-bb48-43903a879c9d	Good	hari ramesh	##########			0	en	us		1	en	good	Positive	0	0	0
Google Play Store	163a89d1-46fd-4969-822b-eea43288f2b8	VERY NICE	Imran Ahmed	##########			0	en	us		4	en	nice	Positive	0	0	0
Google Play Store	3e7cee24-d592-4325-81ed-f4401517f963	Very bad program 3 hrs trying no update newversion😣😣 poor service..instead of wasting timing better look another option😡 it seems poor management system😡 even complain section not answer call 😡 worst service😡😡	Abdu Uppala	##########			0	en	us		1	en	bad program hrs try update newversion poor serviceinstead waste time good look another option seem poor management system even complain section answer call bad service	Negative	1	0	1
Google Play Store	0be4c3fe-3269-4aeb-bc49-a2bc67b40642	MD ASLAM are you good luck to	Md Aslam	##########			0	en	us		5	en	md aslam good luck	Neutral	0	0	0
Google Play Store	1cd1f21c-0966-42d4-a11e-57482322c476	Good	Romeo Legaspi Abedejos	##########			0	en	us		5	en	good	Positive	0	0	0
Google Play Store	a6cfb507-7328-4815-aee0-91146ec58b13	Nice app	Md Naziullah	##########			0	en	us		5	en	nice app	Positive	0	0	0
Google Play Store	3c924282-09dc-4a36-adff-c45208cf1c75	easy app	Soliman Radwan	##########			0	en	us		5	en	easy app	Positive	0	0	0
Google Play Store	4e293583-f8be-4de1-81c3-0f7dc9b1816e	Best app	Syed Irfan Javaid Shah	##########			0	en	us		5	en	best app	Positive	0	0	0
Google Play Store	342ec649-0870-49bd-b529-de51bdf6d36c	Good	aamir parihar	##########			0	en	us		5	en	good	Positive	0	0	0
Google Play Store	cc5da0ac-6d3f-431f-9e77-1ecababcc4fe	Very poor service. Unable to sign in. Every time it shows some error or invalid user name or password but same password and username is properly working in Web browser. Please fix this issue.	Aamir Khalil	##########			13	en	us		1	en	poor service unable sign every time show error invalid user name password password username properly work web browser please fix issue	Negative	1	1	0
Google Play Store	9c7b5e54-1094-46c6-8c8a-a642db39624f	Its so disappointing. Before its better but with this new update for them its annoying. Try to fix this issue. We need an urgent action from you.	joenilyn alarcon	##########			17	en	us		1	en	disappoint good new update annoy try fix issue need urgent action	Negative	1	0	0
Google Play Store	ae895528-c5f1-4cc0-b845-210de2ef5ac8	It is not a fully optimised application	Mohammad Ballouk	2022-01-09 00:24:00			1	en	us		1	en	fully optimise application	Negative	0	1	0
Google Play Store	08f15dba-005c-414b-9861-7931c22ac627	good	Hassan Awaji	##########	Dear customer, Thank you for your trust on BSF services. Your satisfaction is our main goal	##########	0	ar	us		5	en	good	Positive	0	0	0
Google Play Store	97741c1d-65ce-496b-903f-7c9d87ea5761	Too Slow after few usages	Rull Rull	##########	عزيزي العميل, يؤسفنا سماع ذلك و نعمل جاهدا على تحسين و تطوير خدماتنا و منتجاتنا. رضاكم هي غايتنا.	##########	0	ar	us		1	en	slow usages	Negative	0	0	1
Google Play Store	a9a5c735-911d-46f2-8c1c-b3750695e3fb	Good	Mubarak Aldossari	##########			0	ar	us		5	en	good	Positive	0	0	0
Google Play Store	3c6f2ece-0408-4680-880a-e971a9dd356a	The app does not serve the customer professionally. need to develop from a capable programmer.	Le grand livre	##########			0	ar	us		3	en	app serve customer professionally need develop capable programmer	Negative	1	0	0
Google Play Store	9abb974a-7ba8-4784-995b-a35913a09cc5	Wow	Nawaf Fattah	##########			0	ar	us		1	en	wow	Positive	0	0	0
Google Play Store	c9f6f68d-9abd-4905-91b8-936dd3f82c89	Good	Mosa Marhoon	##########			0	ar	us		5	en	good	Positive	0	0	0
Google Play Store	e308f931-146b-46f9-a3a9-74ee981e6eda	Hj	minahi ALQTHMI	##########			0	ar	us		5	en	hj	Neutral	0	0	0
Google Play Store	91bef864-f92b-492c-898f-4c75f7601425	Good	Saleh Alsalman	##########			0	ar	us		5	en	good	Positive	0	0	0
Google Play Store	9ef74ae7-7277-407d-a58d-7667b53babda	No'tGood	Heba Osman	##########			0	ar	us		1	en	notgood	Negative	1	0	0
Google Play Store	3d72fb47-cbc6-4f0f-b5d4-0c227a72415c	Excellent thanks	Zaid Kk	##########			0	ar	us		5	en	excellent thank	Positive	0	0	0
Google Play Store	41c68808-a44e-4fb5-8909-3b832354516e	Ok	مشاري الحارث	##########			0	ar	us		5	en	ok	Positive	0	0	0
Google Play Store	5d967792-18e0-40eb-8a92-994a0a163fc6	Excellant	Ahmed Badr	##########			0	ar	us		5	en	excellant	Positive	0	0	0
