# Supplementary material for: Retrieval-augmented generation analysis of user reviews in Saudi mobile banking apps: a comparative user experience study of iOS and Android
Source: PeerJ journal article supplement (doi:10.7717/peerj-cs.3565), 2026-02-06
Supplement: Android.zip [file riyadbank_final.xlsx]

## Sheet: Sheet 1 - riyadbank_final
riyadbank_final
source	review_id	review_description	user_name	review_date	developer_response	developer_response_date	thumbs_up	language_code	country_code	app_version	rating	en	cleaned_reviews	Sentiment	Satisfaction	Effectiveness	Efficiency
Google Play Store	6648003c-567a-42d1-a3c6-adf20eddf27a	Abnormal comment, no response, texts do not appear due to font and square overlap, in the end it is a waste of time, better to return to the browser.	hammad Abalkhail	##########	عميلنا العزيز، يؤسفنا سماع ذلك ونأمل منك التواصل معنا على الرقم 8001242225 أو من خلال البريد الإلكتروني info@riyadbank.com و تزويدنا بملاحظاتك لنتمكن من خدمتك بشكل أفضل.	##########	0	en	us		1	ar	abnormal comment response texts appear due font square overlap end waste time good return browser	Negative	1	0	1
Google Play Store	a2dfa1ba-ebda-4bdc-b6d3-66645ae4698a	What is this terrible system? I want to transfer and it doesn't send me the code every now and then. It takes me half a day to transfer and they send me the transfer code after half an hour. What is this?	Jonathan _	##########	عميلنا العزيز، يؤسفنا سماع ذلك ونأمل منك التواصل معنا على الرقم 8001242225 أو من خلال البريد الإلكتروني info@riyadbank.com و تزويدنا بملاحظاتك لنتمكن من خدمتك بشكل أفضل.	##########	0	en	us		2	ar	terrible system want transfer doesnt send code every take half day transfer send transfer code half hour	Negative	1	1	0
Google Play Store	589ccfc3-a46a-498a-a39b-2f14eca59e5e	1 They ask me to enter the username and password, then they ask me to enable geolocation and update the application. I think they can ask for geolocation activation or update before entering any information. 2 Previously, the application had permission to access the verification code without the need to enter it manually. Note that Al Ahli and Arabi applications have this feature.	اللهم صل على محمد وآل محمد	##########	عميلنا العزيز، نأمل منك التواصل معنا على الرقم 8001242225 أو من خلال البريد الإلكتروني info@riyadbank.com و تزويدنا بملاحظاتك لنتمكن من خدمتك بشكل أفضل.	##########	0	en	us		1	ar	ask enter username password ask enable geolocation update application think ask geolocation activation update enter information previously application permission access verification code without need enter manually note al ahli arabi applications feature	Neutral	0	1	0
Google Play Store	148ed437-4a65-4773-9098-7bfd1c370828	The application is excellent, but it would be great if it were possible to add letters and certificates inside the application and submit them, and have them delivered to the email.	M D	2023-09-04 05:44:00	عميلنا العزيز، نأمل منك التواصل معنا على الرقم 8001242225 أو من خلال البريد الإلكتروني info@riyadbank.com و تزويدنا بملاحظاتك لنتمكن من خدمتك بشكل أفضل.	2023-09-05 07:29:00	0	en	us		4	ar	application excellent would great possible add letter certificate inside application submit deliver email	Positive	0	1	0
Google Play Store	2f4e4eb8-3d2d-4b01-8ff8-dce872bc7b8e	The application does not work properly on Galaxy Fold 5 devices!!!	Atif Alamri	##########	عميلنا العزيز، يؤسفنا سماع ذلك ونأمل منك التواصل معنا على الرقم 8001242225 أو من خلال البريد الإلكتروني info@riyadbank.com و تزويدنا بملاحظاتك لنتمكن من خدمتك بشكل أفضل.	2023-09-05 07:25:00	0	en	us		1	ar	application work properly galaxy fold devices	Negative	0	1	0
Google Play Store	2cb1f3dd-d7fd-4eef-a867-d0326221f21e	The best banking application	caveman mubrek	##########			0	en	us		5	ar	best bank application	Positive	0	0	0
Google Play Store	3f7f4ab4-e44d-47b9-a0b6-1e878470739f	The application has recently become very, very bad and it crashes. Personally, I have started transferring my transactions.	Am Happy	##########	عميلنا العزيز، يؤسفنا سماع ذلك ونأمل منك التواصل معنا على الرقم 8001242225 أو من خلال البريد الإلكتروني info@riyadbank.com و تزويدنا بملاحظاتك لنتمكن من خدمتك بشكل أفضل.	##########	0	en	us		1	ar	application recently become bad crash personally start transfer transactions	Negative	1	1	1
Google Play Store	71540d57-9905-4739-8569-be29f820f278	They were an excellent bank, now they have become one of the worst banks.	MύĦâMéĐ	##########			0	en	us		1	ar	excellent bank become one bad bank	Negative	1	0	0
Google Play Store	1c303982-c1a6-4da2-9525-6552349a22d8	Worst banking application! It's unbelievable! The amount of technical errors I face is abnormal! If I enter the wrong login once, it completely refuses to let me in and I have to close the application and restart it for it to work. But the worst thing I encountered is the identity verification update. It keeps telling me to try again every time and it never works!	Mohammed AAAs	##########	عميلنا العزيز، يؤسفنا سماع ذلك ونأمل منك التواصل معنا على الرقم 8001242225 أو من خلال البريد الإلكتروني info@riyadbank.com و تزويدنا بملاحظاتك لنتمكن من خدمتك بشكل أفضل.	##########	0	en	us		1	ar	bad bank application unbelievable amount technical errors face abnormal enter wrong login completely refuse let close application restart work bad thing encounter identity verification update keep tell try every time never work	Negative	1	1	0
Google Play Store	82ca13e8-a3af-4e9e-8ed8-1b97b2cc2a9c	Masha Allah	Ibrahim Safi	##########			0	en	us		5	ar	masha allah	Positive	0	0	0
Google Play Store	8a43d508-c874-4b03-9816-5187d4649373	The worst application.	محمد Miq	##########	عميلنا العزيز، يؤسفنا سماع ذلك ونأمل منك التواصل معنا على الرقم 8001242225 أو من خلال البريد الإلكتروني info@riyadbank.com و تزويدنا بملاحظاتك لنتمكن من خدمتك بشكل أفضل.	##########	0	en	us		1	ar	bad application	Negative	1	0	0
Google Play Store	98c7640e-992b-4e5b-b475-84e2ccbfe46c	Slowwwwww	AAK	##########			0	en	us		1	ar	slowwwwww	Neutral	0	0	1
Google Play Store	678a0523-9eb1-4569-bd40-2b632c6f72c0	I will not deal with you again, brother.	Mr Ziyad	##########	عميلنا العزيز، يؤسفنا سماع ذلك ونأمل منك التواصل معنا على الرقم 8001242225 أو من خلال البريد الإلكتروني info@riyadbank.com و تزويدنا بملاحظاتك لنتمكن من خدمتك بشكل أفضل.	##########	0	en	us		1	ar	deal brother	Negative	1	1	0
Google Play Store	cca00c70-5100-4e32-8863-2bb87c854a9a	Very slow and very bad program.	Saad Fawzy	##########	عميلنا العزيز، يؤسفنا سماع ذلك ونأمل منك التواصل معنا على الرقم 8001242225 أو من خلال البريد الإلكتروني info@riyadbank.com و تزويدنا بملاحظاتك لنتمكن من خدمتك بشكل أفضل.	##########	0	en	us		1	ar	slow bad program	Negative	1	0	1
Google Play Store	924bb26d-4356-47b4-95e2-5fca27cd7ea4	As usual and for years, every time the application stabilizes, they release an update that ruins everything. Currently, it is impossible to view or settle credit card accounts, and I have filed a complaint and no one can help. I hope there are fewer updates because they confuse the customer.	EM	##########	عميلنا العزيز، نأمل منك التواصل معنا على الرقم 8001242225 أو من خلال البريد الإلكتروني info@riyadbank.com و تزويدنا بملاحظاتك لنتمكن من خدمتك بشكل أفضل.	##########	0	en	us		1	ar	usual years every time application stabilize release update ruin everything currently impossible view settle credit card account file complaint one help hope few update confuse customer	Negative	0	1	0
Google Play Store	5f30c074-2b25-4ac1-85ab-bf758f078305	The latest update on June 30th.. There is an issue with displaying credit card details.	Hosam Emary	##########	عميلنا العزيز، يؤسفنا سماع ذلك ونأمل منك التواصل معنا على الرقم 8001242225 أو من خلال البريد الإلكتروني info@riyadbank.com و تزويدنا بملاحظاتك لنتمكن من خدمتك بشكل أفضل.	##########	0	en	us		3	ar	late update june th issue display credit card detail	Negative	0	1	0
Google Play Store	a0e34e5f-dec2-436f-bc92-3777aaf10a1f	From personal experience, Bank Al-Riyadh is the worst bank in the Kingdom of Saudi Arabia in all aspects.	Pro	##########	عميلنا العزيز، يؤسفنا سماع ذلك ونأمل منك التواصل معنا على الرقم 8001242225 أو من خلال البريد الإلكتروني info@riyadbank.com و تزويدنا بملاحظاتك لنتمكن من خدمتك بشكل أفضل.	##########	0	en	us		1	ar	personal experience bank alriyadh bad bank kingdom saudi arabia aspects	Negative	1	0	0
Google Play Store	e5a29e82-e863-42a9-afc1-ab27f422f70c	The application is complicated and unclear, and dealing with it is slow. Every time, I have to go to the bank branch to solve the problem.	sarah abusalab	##########	عميلنا العزيز، يؤسفنا سماع ذلك ونأمل منك التواصل معنا على الرقم 8001242225 أو من خلال البريد الإلكتروني info@riyadbank.com و تزويدنا بملاحظاتك لنتمكن من خدمتك بشكل أفضل.	##########	0	en	us		1	ar	application complicate unclear deal slow every time go bank branch solve problem	Negative	1	0	1
Google Play Store	290be46d-74d6-482f-839b-9506a45206c2	The application doesn't work, but it keeps asking me to activate the location even though I have already activated it.	almtdem Sydeen	##########	عميلنا العزيز، نأمل منك التواصل معنا على الرقم 8001242225 أو من خلال البريد الإلكتروني info@riyadbank.com و تزويدنا بملاحظاتك لنتمكن من خدمتك بشكل أفضل.	##########	0	en	us		1	ar	application doesnt work keep ask activate location even though already activate	Negative	0	1	0
Google Play Store	00d354fc-f598-4654-894e-0b6bc6967d9d	From personal experience, one of the best banking applications in Saudi Arabia and the easiest one ever... Don't judge until you use it, then compare and you will know the difference.	z-11 ast3mar	##########			21	en	us		5	ar	personal experience one best bank applications saudi arabia easy one ever dont judge use compare know difference	Positive	0	0	0
Google Play Store	6b665671-8a47-468b-9e1a-9196c9e057a5	The worst bank.	Gathoom 8	##########	عميلنا العزيز، يؤسفنا سماع ذلك ونأمل منك التواصل معنا على الرقم 8001242225 أو من خلال البريد الإلكتروني info@riyadbank.com و تزويدنا بملاحظاتك لنتمكن من خدمتك بشكل أفضل.	##########	0	en	us		1	ar	bad bank	Negative	1	0	0
Google Play Store	b57c74b7-773e-4624-9f10-99377b453f22	One of the worst banking applications, with complexity and slow transactions, starting from the login process, unlike other banks where speed and simplicity prevail.	Mosadag Bushara	2023-06-01 09:17:00	عميلنا العزيز، يؤسفنا سماع ذلك ونأمل منك التواصل معنا على الرقم 8001242225 أو من خلال البريد الإلكتروني info@riyadbank.com و تزويدنا بملاحظاتك لنتمكن من خدمتك بشكل أفضل.	2023-06-04 04:01:00	0	en	us		1	ar	one bad bank applications complexity slow transactions start login process unlike bank speed simplicity prevail	Negative	1	0	1
Google Play Store	29653acb-c973-4106-b60c-7343a6ad60a3	Does not open	ابوعلي حسين	##########	عميلنا العزيز، نأمل منك التواصل معنا على الرقم 8001242225 أو من خلال البريد الإلكتروني info@riyadbank.com و تزويدنا بملاحظاتك لنتمكن من خدمتك بشكل أفضل.	##########	0	en	us		1	ar	open	Neutral	0	1	0
Google Play Store	21795733-0ae5-420e-a088-c7fd4801fef2	Oh Riyadh Bank, the application is very bad..	Mohod E	##########	عميلنا العزيز، يؤسفنا سماع ذلك ونأمل منك التواصل معنا على الرقم 8001242225 أو من خلال البريد الإلكتروني info@riyadbank.com و تزويدنا بملاحظاتك لنتمكن من خدمتك بشكل أفضل.	##########	0	en	us		1	ar	oh riyadh bank application bad	Negative	1	0	0
Google Play Store	6e625694-7c4e-4be9-ae3e-39133aa8b4b3	"The most application that needs an update and remains bad."	Fatem nasser	##########	عميلنا العزيز، يؤسفنا سماع ذلك ونأمل منك التواصل معنا على الرقم 8001242225 أو من خلال البريد الإلكتروني info@riyadbank.com و تزويدنا بملاحظاتك لنتمكن من خدمتك بشكل أفضل.	##########	0	en	us		1	ar	application need update remain bad	Negative	1	0	0
Google Play Store	6fc369f1-2ee1-4efe-9638-ec3704c664be	You cannot transfer money to anyone, even if you have an account in another bank. You cannot transfer to them either on their website or on the application.	Hassan Abdallah	2023-05-09 09:17:00	عميلنا العزيز، نأمل منك التواصل معنا على الرقم 8001242225 أو من خلال البريد الإلكتروني info@riyadbank.com و تزويدنا بملاحظاتك لنتمكن من خدمتك بشكل أفضل.	##########	0	en	us		1	ar	transfer money anyone even account another bank transfer either website application	Negative	0	1	0
Google Play Store	48f19005-6267-4c4c-a7cc-b2120d7443cf	I cannot update the program.	Ahmed Mahmoud	##########	عميلنا العزيز، نأمل منك التواصل معنا على الرقم 8001242225 أو من خلال البريد الإلكتروني info@riyadbank.com و تزويدنا بملاحظاتك لنتمكن من خدمتك بشكل أفضل.	##########	0	en	us		1	ar	update program	Negative	0	1	0
Google Play Store	ce092f52-c1b7-4158-a2c7-1142fcacc904	Good, kind of.	Qusai Ali	2023-05-07 07:49:00			4	en	us		3	ar	good kind	Positive	0	0	0
Google Play Store	b6e94998-d6ad-4fa3-87ca-014e8fae717b	The program literally asks for an update every time I run it.	Ameer A	##########	عميلنا العزيز، نأمل منك التواصل معنا على الرقم 8001242225 أو من خلال البريد الإلكتروني info@riyadbank.com و تزويدنا بملاحظاتك لنتمكن من خدمتك بشكل أفضل.	##########	0	en	us		1	ar	program literally ask update every time run	Neutral	1	0	0
Google Play Store	570bce4e-f08d-493e-869c-245b8ce49fc0	Bad update and not working correctly.	Bashar Kaddor	##########	عميلنا العزيز، يؤسفنا سماع ذلك ونأمل منك التواصل معنا على الرقم 8001242225 أو من خلال البريد الإلكتروني info@riyadbank.com و تزويدنا بملاحظاتك لنتمكن من خدمتك بشكل أفضل.	##########	0	en	us		1	ar	bad update work correctly	Negative	1	1	0
Google Play Store	1a1fa691-3e7e-4609-8326-d714af007b2c	The application is very bad, it hangs a lot.	Asma Designer	##########	عميلنا العزيز، نأسف لسماع ذلك ونأمل منك تزويدنا بالملاحظة التي تواجهك عبر البريد الإلكتروني info@riyadbank.com أو يمكنك التواصل معنا على الرقم 8001242225 لنتمكن من خدمتك.	##########	0	en	us		1	ar	application bad hang lot	Negative	1	0	1
Google Play Store	ea52e248-9098-4be0-95b9-a72e44c74373	After the latest update, the option for transfers is no longer available in the application.	Mujtaba Khudar	##########	عميلنا العزيز، نأمل منك التواصل معنا على الرقم 8001242225 أو من خلال البريد الإلكتروني info@riyadbank.com و تزويدنا بملاحظاتك لنتمكن من خدمتك بشكل أفضل.	##########	0	en	us		1	ar	late update option transfer long available application	Negative	0	1	0
Google Play Store	9ad8d538-6c95-469a-985b-c954c0d003b5	The program crashes frequently.	Bassam Al Zohaier	##########	عميلنا العزيز، يؤسفنا سماع ذلك ونأمل منك التواصل معنا على الرقم 8001242225 أو من خلال البريد الإلكتروني info@riyadbank.com و تزويدنا بملاحظاتك لنتمكن من خدمتك بشكل أفضل.	##########	0	en	us		1	ar	program crash frequently	Negative	0	1	0
Google Play Store	eb5b00a3-81cf-4bb2-8630-01364f6d204c	Unfortunately, the new update has a problem. It does not open unless I give it permission for the website, and even then it does not work.	Mohammad Hamshari	##########	عميلنا العزيز، يؤسفنا سماع ذلك ونأمل منك التواصل معنا على الرقم 8001242225 أو من خلال البريد الإلكتروني info@riyadbank.com و تزويدنا بملاحظاتك لنتمكن من خدمتك بشكل أفضل.	2023-04-08 04:15:00	0	en	us		1	ar	unfortunately new update problem open unless give permission website even work	Negative	0	1	0
Google Play Store	4aef207c-7810-465e-b40e-ad1a55cfb7c7	People reached the stars and the Bank Al Riyadh application freezes and does not let you enter the system.	IBRAHIMATION	##########	عميلنا العزيز، نأسف لسماع ذلك ونأمل منك تزويدنا بالملاحظة التي تواجهك عبر البريد الإلكتروني info@riyadbank.com أو يمكنك التواصل معنا على الرقم 8001242225 لنتمكن من خدمتك.	2023-04-08 04:13:00	0	en	us		1	ar	people reach star bank al riyadh application freeze let enter system	Negative	0	1	1
Google Play Store	c1d44d2c-681e-4390-a23a-63cd6eaa3bfc	The application is extremely bad after the last update. It does not accept fingerprint and freezes with every login attempt. We request finding an update to fix this issue as soon as possible.	حيدر القويعي	##########	عميلنا العزيز، نأسف لسماع ذلك ونأمل منك تزويدنا بالملاحظة التي تواجهك عبر البريد الإلكتروني info@riyadbank.com أو يمكنك التواصل معنا على الرقم 8001242225 لنتمكن من خدمتك.	2023-04-08 04:13:00	1	en	us		2	ar	application extremely bad last update accept fingerprint freeze every login attempt request find update fix issue soon possible	Negative	1	1	1
Google Play Store	7d8b56d7-63ff-4a1e-9c1a-30d0e51890c3	This application developer is not successful, the application does not work???	Camara my	##########	عميلنا العزيز، نأمل منك تزويدنا بالملاحظة التي تواجهك عبر البريد الإلكتروني info@riyadbank.com أو يمكنك التواصل معنا على الرقم 8001242225 لنتمكن من خدمتك.	2023-04-06 04:07:00	1	en	us		1	ar	application developer successful application work	Negative	1	1	0
Google Play Store	8b411283-1c80-498a-891a-ed0a46be2d98	The documentation procedures did not take into account the needs of the family and the presence of young children who we manage their accounts and investment portfolios, as well as some elderly individuals who do not know how to use websites and electronic applications. The bank ignored the customers' interests despite the existence of official documentation mechanisms such as the National Access…	Abu Ahmed	##########	عميلنا العزيز، نأمل منك التواصل معنا على الرقم 8001242225 أو من خلال البريد الإلكتروني info@riyadbank.com و تزويدنا بملاحظاتك لنتمكن من خدمتك بشكل أفضل.	2023-04-06 04:06:00	0	en	us		1	ar	documentation procedures take account need family presence young children manage account investment portfolios well elderly individuals know use websites electronic applications bank ignore customers interest despite existence official documentation mechanisms national access website hope none bank employees ask send email display fake interest word	Negative	1	1	0
Google Play Store	7042ee28-cde0-4312-8f10-fc92192b34a4	The program has become disgusting. Every now and then it gives me an error and I can't log in until I change the password.	قناة الأطفال المميزة	##########	عميلنا العزيز، نأسف لسماع ذلك ونأمل منك تزويدنا بالملاحظة التي تواجهك عبر البريد الإلكتروني info@riyadbank.com أو يمكنك التواصل معنا على الرقم 8001242225 لنتمكن من خدمتك.	##########	0	en	us		3	ar	program become disgust every give error cant log change password	Negative	1	1	0
Google Play Store	b240b8cc-8133-4981-b3d9-c60e57f17e3c	I cannot access my account. The application shows that there is a problem with sharing the location, despite there being no issue.	Yamama ALNasser	##########	عميلنا العزيز، نأمل منك التواصل معنا على الرقم 8001242225 أو من خلال البريد الإلكتروني info@riyadbank.com و تزويدنا بملاحظاتك لنتمكن من خدمتك بشكل أفضل.	##########	0	en	us		1	ar	access account application show problem share location despite issue	Negative	0	1	0
Google Play Store	f1165794-6477-4817-bc46-cae9f0102c77	The program is heavy and slow. It's an old program from 2011 with bad design. You can't see card information and it keeps calling you with a bot (artificial intelligence) every now and then. There is no fast login, you have to type in the password, which cannot be easy, it must have sixty billion characters, forty dashes, and sixty dots. They claim to have fast registration, but its only benefit …	D. Al3amri	##########	عميلنا العزيز، يؤسفنا سماع ذلك ونأمل منك التواصل معنا على الرقم 8001242225 أو من خلال البريد الإلكتروني info@riyadbank.com و تزويدنا بملاحظاتك لنتمكن من خدمتك بشكل أفضل.	##########	0	en	us		1	ar	program heavy slow old program bad design cant see card information keep call bot artificial intelligence every fast login type password easy must sixty billion character forty dash sixty dot claim fast registration benefit check balance useless big difference application application last program suggest anyone improve fix fonts user interface everything suffocate dont know find balance interface	Negative	1	1	1
Google Play Store	0f4aefd8-17d6-4b18-b84d-0b8889c34bb4	Good people, please try to develop the application and add features and improvements to make it more useful. Look at the Al Rajhi Bank app and the new Alinma app. When you enter the app, you will feel relaxed mentally. Riyadh deserves development and improvement.	أمہيہر ألظہلأأمہ	##########	عميلنا العزيز، نأمل منك التواصل معنا على الرقم 8001242225 أو من خلال البريد الإلكتروني info@riyadbank.com و تزويدنا بملاحظاتك لنتمكن من خدمتك بشكل أفضل.	##########	0	en	us		3	ar	good people please try develop application add feature improvements make useful look al rajhi bank app new alinma app enter app feel relax mentally riyadh deserve development improvement	Positive	1	0	0
Google Play Store	7d5cf112-590b-4696-81b1-51fc4753f0fe	Honestly, the application was good, but after the new updates, especially the update that allows access to the location, it became bad. Every time I try to enter the application, I receive this notification, and even when I enable the location, an error occurs. I allow access to the location and delete the application, then reinstall it, and the same problem occurs. I hope you can find a solution…	Nouf Alharbi	##########	عميلنا العزيز، يؤسفنا سماع ذلك ونأمل منك التواصل معنا على الرقم 8001242225 أو من خلال البريد الإلكتروني info@riyadbank.com و تزويدنا بملاحظاتك لنتمكن من خدمتك بشكل أفضل.	##########	0	en	us		1	ar	honestly application good new update especially update allow access location become bad every time try enter application receive notification even enable location error occur allow access location delete application reinstall problem occur hope find solution problem	Negative	1	1	0
Google Play Store	0d1935ea-47b1-4e90-9db6-c277fde7af7b	Weak services, account disclosure is not functioning, investment account details do not appear, and other services that are not working.	abdulmajid almulhim	##########	عميلنا العزيز، نأمل منك التواصل معنا على الرقم 8001242225 أو من خلال البريد الإلكتروني info@riyadbank.com و تزويدنا بملاحظاتك لنتمكن من خدمتك بشكل أفضل.	##########	0	en	us		2	ar	weak service account disclosure function investment account detail appear service work	Negative	1	1	0
Google Play Store	1c9a2dcc-b4d1-48d2-af95-a160663e7cc6	There is a new annoying problem preventing me from accessing the laptop. The error message says "Access to the website is incorrect (OK button)". Please fix the error. Your response: Contact the number why? There is a malfunction and a general malfunction. All the comments here are talking about it. Fix it in the next update and may God bless.	Mahmoud Al-Tabsh	##########	عميلنا العزيز، نأسف لسماع ذلك ونأمل منك تزويدنا بالملاحظة التي تواجهك عبر البريد الإلكتروني info@riyadbank.com أو يمكنك التواصل معنا على الرقم 8001242225 لنتمكن من خدمتك.	##########	0	en	us		1	ar	new annoy problem prevent access laptop error message say access website incorrect ok button please fix error response contact number malfunction general malfunction comment talk fix next update may god bless	Negative	1	1	0
Google Play Store	448cb492-d2e9-4128-939a-f9706acad649	There is a problem after updating the application where it asks for permission to access the location, and despite activating it, the program shows an error message stating that it is unable to verify the location. I am using a Samsung Note 9 device.	Mohammed Ali	##########	عميلنا العزيز، يؤسفنا سماع ذلك ونأمل منك مشاركتنا ملاحظتك من خلال التواصل على الرقم 8001242225 أو عبر البريد الالكتروني info@riyadbank.com و سيتم النظر في الملاحظة بعين الاعتبار	##########	0	en	us		5	ar	problem update application ask permission access location despite activate program show error message state unable verify location use samsung note device	Negative	0	1	0
Google Play Store	a5527c27-1423-41e9-baf5-58bfcb93cfcb	Very bad application	Jalilrw Rwim	##########	عميلنا العزيز، يؤسفنا سماع ذلك ونأمل منك التواصل معنا على الرقم 8001242225 أو من خلال البريد الإلكتروني info@riyadbank.com و تزويدنا بملاحظاتك لنتمكن من خدمتك بشكل أفضل.	##########	0	en	us		1	ar	bad application	Negative	1	0	0
Google Play Store	652c7852-2ac1-4a9e-9a9c-b1f79ea532b8	The application has improved greatly.	Saud Alqahtani	##########			1	en	us		5	ar	application improve greatly	Positive	0	0	0
Google Play Store	58068ee8-17b9-4da7-bb2b-1d7f54b831e2	Unfortunately, every time the software is updated, it becomes worse and more complicated.	ayoub ahmed	2023-03-09 01:48:00			0	en	us		1	ar	unfortunately every time software update become bad complicate	Negative	1	0	0
Google Play Store	d7d7a1a3-0acd-4e81-b4f8-05a7e84354a2	Recently, an error message appears (Allow Access to the Site) despite granting the application access to the site's services and activating the GPS service on the mobile. However, the error message appears sometimes and the cause is unknown.	Ph. Yousif Alhamad	##########			0	en	us		3	ar	recently error message appear allow access site despite grant application access sit service activate gps service mobile however error message appear sometimes cause unknown	Negative	0	1	0
Google Play Store	8d113f90-ef45-4a56-97e8-c1546022f289	Why can't I paste my password on the login page?	Khaled Alfaris	2023-03-02 01:48:00			0	en	us		1	ar	cant paste password login page	Neutral	0	1	0
Google Play Store	85cdd0b6-7acb-417d-af94-47cc70b58283	I have a rotten application that I have been using. I bought my Z Fold mobile for 7,000 riyals, and the application's interface appears on the screen in a distorted way, making it unusable like normal people. It also asks for access permissions to the GPS location, and I have given it all the permissions for this stupid application, but it still won't work. All I want is to add a beneficiary, and…	SAMI ALKHAMMASH	##########			0	en	us		1	ar	rotten application use buy z fold mobile riyals applications interface appear screen distort way make unusable like normal people also ask access permissions gps location give permissions stupid application still wont work want add beneficiary rubbish come website deal rotten application finally contact bank add beneficiary call employee	Negative	1	1	0
Google Play Store	331dad6c-526d-4861-8122-ce5740808c22	The worst bank application doesn't send the confirmation code, and you can't access it. The employees are not helpful at all. I asked them to transfer the money, but they haven't finished their working hours yet. They told me to go to the ATM.	Uouo -15	##########			0	en	us		1	ar	bad bank application doesnt send confirmation code cant access employees helpful ask transfer money havent finish work hours yet tell go atm	Negative	1	1	0
Google Play Store	697b98ee-6bb2-487f-b4dd-694fa0f83d5d	Bad update, I don't understand why location is required to open my banking application.	A G	2023-03-01 01:44:00			2	en	us		1	ar	bad update dont understand location require open bank application	Negative	1	0	0
Google Play Store	fa1dacbb-8124-40b2-884f-428594f54f5a	Peace be upon you, after the latest update, the application does not open and an error message appears stating that the site cannot be accessed. I would like to inform you that the site is active and has privacy and security settings enabled. I have allowed the Riyadh application to access the site. Please solve the problem. The device is Samsung Note 9 with Android 10.	AHMAD Ibrahim (Abuqouta)	##########	عميلنا العزيز، نأمل منك التواصل معنا على الرقم 8001242225 أو من خلال البريد الإلكتروني info@riyadbank.com و تزويدنا بملاحظاتك لنتمكن من خدمتك بشكل أفضل.	##########	0	en	us		1	ar	peace upon late update application open error message appear state site access would like inform site active privacy security settings enable allow riyadh application access site please solve problem device samsung note android	Neutral	0	1	0
Google Play Store	b6480b76-d1ab-411d-a734-1742dcc7742e	The application does not work properly on Samsung zfold3 mobile phones.	Mohannad Olayan	##########	عميلنا العزيز، نأمل منك تزويدنا بالملاحظة التي تواجهك عبر البريد الإلكتروني info@riyadbank.com أو يمكنك التواصل معنا على الرقم 8001242225 لنتمكن من خدمتك.	##########	0	en	us		1	ar	application work properly samsung zfold mobile phone	Negative	0	1	0
Google Play Store	cf8e6d73-d8f2-469b-9f6f-2b1d4e4cfc85	The latest update is giving a system error. Please solve the problem.	Hamad Osman	##########	عميلنا العزيز، نأمل منك تزويدنا بالملاحظة التي تواجهك عبر البريد الإلكتروني info@riyadbank.com أو يمكنك التواصل معنا على الرقم 8001242225 لنتمكن من خدمتك.	##########	0	en	us		4	ar	late update give system error please solve problem	Negative	0	1	0
Google Play Store	d8a09866-2faa-46c9-b617-b3b08cfa158e	Spyware program requires you to give it your location in order to use it, haha, why does the bank need this information, such a lack of respect for privacy.	hamidious	##########			0	en	us		1	ar	spyware program require give location order use haha bank need information lack respect privacy	Negative	1	0	0
Google Play Store	bb7239a8-370c-46d9-8987-06dddd663856	The latest update is garbage. It's not recognizing the location and it's not opening the application.	Coco Kookoo	##########	عميلنا العزيز، نأسف لسماع ذلك ونأمل منك تزويدنا بالملاحظة التي تواجهك عبر البريد الإلكتروني info@riyadbank.com أو يمكنك التواصل معنا على الرقم 8001242225 لنتمكن من خدمتك.	##########	0	en	us		1	ar	late update garbage recognize location open application	Negative	0	1	0
Google Play Store	1ccb7da1-26ed-4793-a8e1-ac4990532c5e	You need to update us on every application update. It is not updating.	Majid Bahaddad	##########	عميلنا العزيز، نأمل منك تزويدنا بالملاحظة التي تواجهك عبر البريد الإلكتروني info@riyadbank.com أو يمكنك التواصل معنا على الرقم 8001242225 لنتمكن من خدمتك.	##########	0	en	us		1	ar	need update us every application update update	Negative	1	0	0
Google Play Store	6bb67656-3c8d-493f-a405-f6cb7be8b1ef	"The application requested permission for the location, so I went into the application settings and enabled the location permission. However, when I enter my username and password, it says there is an error with the location permission. I uninstalled the app and reinstalled it, but it still gives the same error."	Sherif Hamdy	##########	عميلنا العزيز، نأسف لسماع ذلك ونأمل منك تزويدنا بالملاحظة التي تواجهك عبر البريد الإلكتروني info@riyadbank.com أو يمكنك التواصل معنا على الرقم 8001242225 لنتمكن من خدمتك.	##########	0	en	us		1	ar	application request permission location go application settings enable location permission however enter username password say error location permission uninstalled app reinstall still give error	Negative	0	1	0
Google Play Store	e7d0bbe3-379d-4e34-9c37-0d15f3c27fe8	The Bouki app isn't working and I don't know how to open an account. Please help.	Mohammed Elgarhy	##########	عميلنا العزيز، نأمل منك التواصل معنا على الرقم 8001242225 أو من خلال البريد الإلكتروني info@riyadbank.com و تزويدنا بملاحظاتك لنتمكن من خدمتك بشكل أفضل.	##########	0	en	us		1	ar	bouki app isnt work dont know open account please help	Negative	0	1	0
Google Play Store	22a40bc0-c6e6-4d2f-acea-a870cbeb06c0	Very bad, it keeps freezing and stopping frequently. Even if it needs an update, it doesn't give a notification and instead it prefers to reject the password or freeze. At that point, I have to open the store and find out that there's an update available.	shiko elking	##########	عميلنا العزيز، نأسف لسماع ذلك ونأمل منك تزويدنا بالملاحظة التي تواجهك عبر البريد الإلكتروني info@riyadbank.com أو يمكنك التواصل معنا على الرقم 8001242225 لنتمكن من خدمتك.	2023-02-09 03:30:00	0	en	us		2	ar	bad keep freeze stop frequently even need update doesnt give notification instead prefer reject password freeze point open store find theres update available	Negative	1	0	1
Google Play Store	e1f99373-ca4d-4354-b446-279fe3e34154	Very weak application, it has a problem with fingerprint activation and quick login.	hossam Abdulrazeik	##########	عميلنا العزيز، يؤسفنا سماع ذلك ونأمل منك التواصل معنا على الرقم 8001242225 أو من خلال البريد الإلكتروني info@riyadbank.com و تزويدنا بملاحظاتك لنتمكن من خدمتك بشكل أفضل.	2023-02-09 03:30:00	0	en	us		1	ar	weak application problem fingerprint activation quick login	Negative	1	1	0
Google Play Store	ca070e68-f195-4f92-8757-ba2f5435a745	Riyadh Bank has creative people in developing ideas and unsuccessful people in implementing them, resulting in a peak of failure.	Hany H	##########	عميلنا العزيز، يؤسفنا سماع ذلك ونأمل منك التواصل معنا على الرقم 8001242225 أو من خلال البريد الإلكتروني info@riyadbank.com و تزويدنا بملاحظاتك لنتمكن من خدمتك بشكل أفضل.	##########	0	en	us		1	ar	riyadh bank creative people develop ideas unsuccessful people implement result peak failure	Negative	1	0	0
Google Play Store	5729a602-c7f9-43a9-b92e-9ac0069664f7	A complex application specifically for local transfers.	Mohsin Aameri	##########	عميلنا العزيز، يؤسفنا سماع ذلك ونأمل منك التواصل معنا على الرقم 8001242225 أو من خلال البريد الإلكتروني info@riyadbank.com و تزويدنا بملاحظاتك لنتمكن من خدمتك بشكل أفضل.	##########	0	en	us		1	ar	complex application specifically local transfer	Neutral	1	0	0
Google Play Store	4ba93924-2fd3-4bb9-bd65-91270d69f2e5	Excellent program and it has all the services I need. But after the update, Hesad Mall does not work and asks for login???	Rafat AL-Labban	##########	عميلنا العزيز، نأمل منك تزويدنا بالملاحظة التي تواجهك عبر البريد الإلكتروني info@riyadbank.com أو يمكنك التواصل معنا على الرقم 8001242225 لنتمكن من خدمتك.	##########	0	en	us		4	ar	excellent program service need update hesad mall work ask login	Positive	1	1	0
Google Play Store	26ea2291-6b28-4e4e-a85b-8368c518bb2d	The application does not open.	Othman Al Dawodi	##########	عميلنا العزيز، نأمل منك التواصل معنا على الرقم 8001242225 أو من خلال البريد الإلكتروني info@riyadbank.com و تزويدنا بملاحظاتك لنتمكن من خدمتك بشكل أفضل.	##########	0	en	us		1	ar	application open	Neutral	0	1	0
Google Play Store	7e82944c-7540-4686-9fcc-6c56f7785c1a	I wish you would test the updates before releasing them.	Mohamed Salah	##########	عميلنا العزيز، يؤسفنا سماع ذلك ونأمل منك التواصل معنا على الرقم 8001242225 أو من خلال البريد الإلكتروني info@riyadbank.com و تزويدنا بملاحظاتك لنتمكن من خدمتك بشكل أفضل.	##########	0	en	us		1	ar	wish would test update release	Negative	0	1	0
Google Play Store	bb23f0f6-be52-45b1-bc10-4ca6799df12f	The updates are always going from bad to worse... Please see what Al Rajhi is doing and do the same.	Emad Barakat	##########	عميلنا العزيز، يؤسفنا سماع ذلك ونأمل منك التواصل معنا على الرقم 8001242225 أو من خلال البريد الإلكتروني info@riyadbank.com و تزويدنا بملاحظاتك لنتمكن من خدمتك بشكل أفضل.	##########	0	en	us		1	ar	update always go bad bad please see al rajhi	Negative	1	0	0
Google Play Store	55ea6956-6f14-407c-9027-ad3330f3ec97	The application is good, but every time the application is updated, it requires re-authenticating the device, fingerprint, etc. This issue is very frustrating, to the point that the latest update gets stuck on the login page. I hope you can solve these problems.	Waed Al Nasri	##########	عميلنا العزيز، نأمل منك التواصل معنا على الرقم 8001242225 أو من خلال البريد الإلكتروني info@riyadbank.com و تزويدنا بملاحظاتك لنتمكن من خدمتك بشكل أفضل.	##########	0	en	us		2	ar	application good every time application update require reauthenticating device fingerprint etc issue frustrate point late update get stick login page hope solve problems	Negative	1	1	1
Google Play Store	a055e2c9-fbf9-4aec-88c8-105ee949f23e	The application has become worse after the update and is not organized, it does not live up to the reputation of the bank to keep up with some of its competitors from other banks.	Ali Hussain	##########	عميلنا العزيز، يؤسفنا سماع ذلك ونأمل منك التواصل معنا على الرقم 8001242225 أو من خلال البريد الإلكتروني info@riyadbank.com و تزويدنا بملاحظاتك لنتمكن من خدمتك بشكل أفضل.	##########	0	en	us		1	ar	application become bad update organize live reputation bank keep competitors bank	Negative	1	0	0
Google Play Store	4ebae6d2-10c0-45a0-80dd-d36dd5862d02	The application is slower compared to the old version. Also, account information including balance, transactions, and other services are not available in one place or in an easily accessible location. You have to navigate through many pages to obtain information or perform a transaction.	imn net	##########	عميلنا العزيز، نأمل منك تزويدنا بالملاحظة التي تواجهك عبر البريد الإلكتروني info@riyadbank.com أو يمكنك التواصل معنا على الرقم 8001242225 لنتمكن من خدمتك.	##########	0	en	us		2	ar	application slow compare old version also account information include balance transactions service available one place easily accessible location navigate many page obtain information perform transaction	Negative	0	1	1
Google Play Store	36c2a031-a9a8-48c5-8e1e-455bca31cabb	The bank is the worst and its application is also the worst. Every time I try to log in, it says that the application needs to be updated, even though it is the latest version available on Google!	John Doe	##########	عميلنا العزيز، نأسف لسماع ذلك ونأمل منك تزويدنا بالملاحظة التي تواجهك عبر البريد الإلكتروني info@riyadbank.com أو يمكنك التواصل معنا على الرقم 8001242225 لنتمكن من خدمتك.	##########	0	en	us		1	ar	bank bad application also bad every time try log say application need update even though late version available google	Negative	1	0	0
Google Play Store	415a9b6e-6894-4bb0-a676-a2bdbf7422e3	You destroyed the program. As soon as I enter the number to block the mobile from making calls, the line disconnects. Find a solution for yourself.	ibrahim alhamad	##########	عميلنا العزيز، يؤسفنا سماع ذلك ونأمل منك التواصل معنا على الرقم 8001242225 أو من خلال البريد الإلكتروني info@riyadbank.com و تزويدنا بملاحظاتك لنتمكن من خدمتك بشكل أفضل.	##########	0	en	us		1	ar	destroy program soon enter number block mobile make call line disconnect find solution	Negative	0	1	0
Google Play Store	6efc8f5c-256a-49a8-96d2-2261dffd13d7	The program is beautiful and has developed a lot compared to previous years.	Fahad	##########			0	en	us		5	ar	program beautiful develop lot compare previous years	Positive	1	0	0
Google Play Store	72834e3b-39f9-4125-af9c-d19ee3f90d98	The new update has a problem with installing on my honor magic 4 pro device. What is the solution?	moh ali	##########	عميلنا العزيز، نأمل منك التواصل معنا على الرقم 8001242225 أو من خلال البريد الإلكتروني info@riyadbank.com و تزويدنا بملاحظاتك لنتمكن من خدمتك بشكل أفضل.	##########	0	en	us		2	ar	new update problem instal honor magic pro device solution	Negative	0	1	0
Google Play Store	eccd2402-5717-40bc-b39c-e86bce8354bd	There is a problem with the new update, I cannot view the card information for the current account.	Abdullah Alnasser	##########	عميلنا العزيز، نأمل منك التواصل معنا على الرقم 8001242225 أو من خلال البريد الإلكتروني info@riyadbank.com و تزويدنا بملاحظاتك لنتمكن من خدمتك بشكل أفضل.	##########	0	en	us		3	ar	problem new update view card information current account	Negative	0	1	0
Google Play Store	b7c423e2-ee5e-49c3-b650-8327f5dcde26	The worst banking application with countless errors.	Ali AlHuwayshil	##########	عميلنا العزيز، يؤسفنا سماع ذلك ونأمل منك التواصل معنا على الرقم 8001242225 أو من خلال البريد الإلكتروني info@riyadbank.com و تزويدنا بملاحظاتك لنتمكن من خدمتك بشكل أفضل.	##########	0	en	us		1	ar	bad bank application countless errors	Negative	1	1	0
Google Play Store	c4649e00-e09b-4390-80c5-d23ce5f7aeca	"I need to access the program to perform a necessary task, but why is it locked?"	aziz alk	##########	عميلنا العزيز، نأمل منك تزويدنا بالملاحظة التي تواجهك عبر البريد الإلكتروني info@riyadbank.com أو يمكنك التواصل معنا على الرقم 8001242225 لنتمكن من خدمتك.	##########	0	en	us		1	ar	need access program perform necessary task lock	Negative	1	1	0
Google Play Store	8047186e-9f7b-44ca-8ed8-3c7080060d18	Bad	2020 rumyzan	##########	عميلنا العزيز، نأسف لسماع ذلك ونأمل منك تزويدنا بالملاحظة التي تواجهك عبر البريد الإلكتروني info@riyadbank.com أو يمكنك التواصل معنا على الرقم 8001242225 لنتمكن من خدمتك.	##########	0	en	us		1	ar	bad	Neutral	1	0	0
Google Play Store	2acdba52-8128-43f6-9185-36f92ea24a6e	All praise be to Allah/God, good/well.	abdul gaffar	##########			0	en	us		5	ar	praise allahgod goodwell	Positive	0	0	0
Google Play Store	698f74b9-7ac4-4469-a041-b82f96a9f5db	I was still sitting with you in the chat and suddenly you removed me from the program. Why? By Allah, this is a frustrating move. Fix this security system.	abdullkareem albrahim	##########	عميلنا العزيز، نأسف لسماع ذلك ونأمل منك تزويدنا بالملاحظة التي تواجهك عبر البريد الإلكتروني info@riyadbank.com أو يمكنك التواصل معنا على الرقم 8001242225 لنتمكن من خدمتك.	##########	0	en	us		1	ar	still sit chat suddenly remove program allah frustrate move fix security system	Negative	1	1	1
Google Play Store	e8336ebe-8769-42bc-a709-ab435caae701	The program's quality is bad. Learn from Al Ahli Bank.	احمد عبد الحليم حافظ	##########	عميلنا العزيز، يؤسفنا سماع ذلك ونأمل منك التواصل معنا على الرقم 8001242225 أو من خلال البريد الإلكتروني info@riyadbank.com و تزويدنا بملاحظاتك لنتمكن من خدمتك بشكل أفضل.	##########	0	en	us		2	ar	program quality bad learn al ahli bank	Negative	1	0	0
Google Play Store	153f0447-8feb-4c4f-9748-e8db01d54c89	Very bad after the new update, I wish you hadn't done it. I changed my rating from 5 stars to one star, and if there were negative 5 stars, I would have given it due to the poor performance, slowness, and errors.	Bashir Ahmad	##########	عميلنا العزيز، يؤسفنا سماع ذلك ونأمل منك التواصل معنا على الرقم 8001242225 أو من خلال البريد الإلكتروني info@riyadbank.com و تزويدنا بملاحظاتك لنتمكن من خدمتك بشكل أفضل.	##########	0	en	us		1	ar	bad new update wish hadnt do change rat star one star negative star would give due poor performance slowness errors	Negative	1	0	1
Google Play Store	fb79dade-eff4-46a6-8597-b1736220fb17	Unfortunately, it is the worst program on Earth. I wish you would take experience from reputable banks and respect the customer, like Bank of America. I don't think you lack money.	Abdullah Almuhish	##########	عميلنا العزيز، يؤسفنا سماع ذلك ونأمل منك التواصل معنا على الرقم 920002470 أو من خلال البريد الإلكتروني info@riyadbank.com و تزويدنا بملاحظاتك لنتمكن من خدمتك بشكل أفضل.	##########	0	en	us		1	ar	unfortunately bad program earth wish would take experience reputable bank respect customer like bank america dont think lack money	Negative	1	0	0
Google Play Store	f612188f-51e3-4e37-b1e9-c9bcd4bf3250	Failed program and bank. Looser bank and the worst app.	Khaled Ibrahim	##########	عميلنا العزيز، يؤسفنا سماع ذلك ونأمل منك التواصل معنا على الرقم 8001242225 أو من خلال البريد الإلكتروني info@riyadbank.com و تزويدنا بملاحظاتك لنتمكن من خدمتك بشكل أفضل.	##########	0	en	us		1	ar	fail program bank loose bank bad app	Negative	1	0	0
Google Play Store	77189a66-9c9e-4fc9-9e3f-27469c85bd56	Its program has many errors that are countless, and there is no interest from the bank towards its electronic channels.	هشام بابكير	##########	عميلنا العزيز، يؤسفنا سماع ذلك ونأمل منك التواصل معنا على الرقم 8001242225 أو من خلال البريد الإلكتروني info@riyadbank.com و تزويدنا بملاحظاتك لنتمكن من خدمتك بشكل أفضل.	##########	0	en	us		2	ar	program many errors countless interest bank towards electronic channel	Negative	1	1	0
Google Play Store	289de071-9438-421a-8da0-0cf4391f493f	"Overthinks a lot"	Ziyad	2022-09-09 05:55:00	عميلنا العزيز، نأمل منك تزويدنا بالملاحظة التي تواجهك عبر البريد الإلكتروني info@riyadbank.com أو يمكنك التواصل معنا على الرقم 8001242225 لنتمكن من خدمتك.	##########	0	en	us		2	ar	overthinks lot	Neutral	1	0	0
Google Play Store	89e637e3-d6f7-49a8-83d0-4dd3c9c05e5f	Suddenly and without any introductions, the application started rejecting the username and password, even though I am typing them correctly and I am sure of it.	Mohammed Awad	2022-09-09 01:27:00	عميلنا العزيز، يؤسفنا سماع ذلك ونأمل منك التواصل معنا على الرقم 8001242225 أو من خلال البريد الإلكتروني info@riyadbank.com و تزويدنا بملاحظاتك لنتمكن من خدمتك بشكل أفضل.	##########	0	en	us		1	ar	suddenly without introductions application start reject username password even though type correctly sure	Negative	0	1	0
Google Play Store	df323a47-986b-4fff-9bf1-7bd38d3ffef6	Very bad on Android, I have to uninstall it and then download it multiple times after using it. The Android version is the worst.	amer zegafy	##########			2	en	us		1	ar	bad android uninstall download multiple time use android version bad	Negative	1	0	0
Google Play Store	7c88717c-b32b-495b-b336-d01c80859188	He talks a lot and is slow.	Abdolhadi Sheikh	##########			0	en	us		2	ar	talk lot slow	Negative	0	0	1
Google Play Store	81f96c0e-8fe4-4407-a545-913c6e1e4825	Slow application	malik Ismail	##########	عميلنا العزيز، يؤسفنا سماع ذلك ونأمل منك التواصل معنا على الرقم 920002470 أو من خلال البريد الإلكتروني info@riyadbank.com و تزويدنا بملاحظاتك لنتمكن من خدمتك بشكل أفضل.	##########	0	en	us		3	ar	slow application	Negative	0	0	1
Google Play Store	d359716c-dee7-4730-b526-711e7e907b1b	The bad application always says "Check your network and internet, I have a full connection". Besides that, every time I try to use the fingerprint feature, it tells me "This feature has not been registered."	Reem Amoudi	##########	عميلنا العزيز، يؤسفنا سماع ذلك ونأمل منك التواصل معنا على الرقم 920002470 أو من خلال البريد الإلكتروني info@riyadbank.com و تزويدنا بملاحظاتك لنتمكن من خدمتك بشكل أفضل.	##########	0	en	us		1	ar	bad application always say check network internet full connection besides every time try use fingerprint feature tell feature register	Negative	1	1	0
Google Play Store	c5a22883-8df4-432a-ba8c-0499ed9c348e	Terrible application.	youssef soliman	##########	عميلنا العزيز، يؤسفنا سماع ذلك ونأمل منك التواصل معنا على الرقم 920002470 أو من خلال البريد الإلكتروني info@riyadbank.com و تزويدنا بملاحظاتك لنتمكن من خدمتك بشكل أفضل.	##########	0	en	us		1	ar	terrible application	Negative	1	0	0
Google Play Store	875f6813-a15e-4ea8-891a-4229a4bc57c3	The worst banking program on the planet.	raeid	##########	عميلنا العزيز، يؤسفنا سماع ذلك ونأمل منك التواصل معنا على الرقم 920002470 أو من خلال البريد الإلكتروني info@riyadbank.com و تزويدنا بملاحظاتك لنتمكن من خدمتك بشكل أفضل.	##########	0	en	us		1	ar	bad bank program planet	Negative	1	0	0
Google Play Store	a8af3bd6-787e-4374-a7ed-693682fdcbf0	I opened the application for the first time, it worked fine. When trying to open the application for the second time, it doesn't open, it freezes with you.	Abdullah Bokhari	##########	عميلنا العزيز، يؤسفنا سماع ذلك ونأمل منك التواصل معنا على الرقم 920002470 أو من خلال البريد الإلكتروني info@riyadbank.com و تزويدنا بملاحظاتك لنتمكن من خدمتك بشكل أفضل.	##########	0	en	us		1	ar	open application first time work fine try open application second time doesnt open freeze	Neutral	0	1	1
Google Play Store	356510ad-8d7c-4dfb-8a9f-5d7750f0d923	The application is very stupid and does not keep up with the level of other banking applications. One annoying thing is that if the user enters the wrong password, the application freezes and asks for internet connection verification, and the temporary data must be cleared in order to retry 😵.	Abu Faisal	##########	عميلنا العزيز، يؤسفنا سماع ذلك ونأمل منك التواصل معنا على الرقم 920002470 أو من خلال البريد الإلكتروني info@riyadbank.com و تزويدنا بملاحظاتك لنتمكن من خدمتك بشكل أفضل.	2022-06-09 07:58:00	0	en	us		1	ar	application stupid keep level bank applications one annoy thing user enter wrong password application freeze ask internet connection verification temporary data must clear order retry	Negative	1	1	1
Google Play Store	a19d4fea-f224-4ce9-b624-a2fb3aec475d	In 2019, it was the worst banking application I used. Now, in 2022, it is one of the best applications in the market and competes strongly with the major ones. A salute and thank you as big as the sky to the developers. May God bless you. ❤	Modî	##########			0	en	us		4	ar	bad bank application use one best applications market compete strongly major ones salute thank big sky developers may god bless	Positive	1	0	0
Google Play Store	6bfb9043-4a26-4899-aa85-bcbb39f92567	A very bad program, maintenance and errors every day or every other day. It delays your transfer and delays people with you, unfortunately. Also, the maintenance is bad, it took more than 6 hours for the transfer to not be completed and the money returned to the account.	IMz7rb	##########			1	en	us		1	ar	bad program maintenance errors every day every day delay transfer delay people unfortunately also maintenance bad take hours transfer complete money return account	Negative	1	1	1
Google Play Store	a6c002dc-dedb-4df5-81cb-bb1223ec6689	One of the best banks to deal with and easier in terms of dealing through the program.	Sadiq Salim Al mashjari	##########			0	en	us		5	ar	one best bank deal easy term deal program	Positive	0	0	0
Google Play Store	471a221b-70c6-4891-9acd-f3d38641e82f	Easy to use and covers all services ..excellent	Abdull Sa	##########			0	en	us		5	ar	easy use cover service excellent	Positive	0	0	0
Google Play Store	da8774d6-0b7e-4ea6-be82-74420dec9ee9	The Bank Al Riyadh app is an excellent app, but sometimes it delays sending the verification code to the app. Now, it has become a very, very bad app.	Khaled Abdullah	##########			1	en	us		1	ar	bank al riyadh app excellent app sometimes delay send verification code app become bad app	Negative	1	0	1
Google Play Store	7ed1b126-2552-4b0d-96f1-1be0217bbdec	We cannot make internal transfers through it.	Muhammad Mustafa	##########			0	en	us		3	ar	make internal transfer	Neutral	0	1	0
Google Play Store	3a7eb9cd-dc17-4067-9bb3-eab8d3f89a99	Most of the time it crashes, I think it's the worst banking application available.	Kermmey Alharbi	##########			0	en	us		1	ar	time crash think bad bank application available	Negative	1	1	0
Google Play Store	44b091c6-0df0-4e44-a53d-60a77844d205	Fingerprint registration is done, and at the same moment it is canceled, which is very bad.	Ali Mnam	##########	عميلنا العزيز، نأمل منك التواصل معنا على الرقم 920002470 لنتمكن من خدمتك.	##########	0	en	us		1	ar	fingerprint registration do moment cancel bad	Negative	1	1	0
Google Play Store	052f8945-2f47-49df-b64c-0b2467670f18	There is a problem with the fingerprint feature and logging in with a short passcode. Please fix the service. Thank you.	Rayan Saoud	2022-05-07 07:28:00	عميلنا العزيز، نأمل منك التواصل معنا على الرقم 920002470 أو من خلال البريد الإلكتروني info@riyadbank.com و تزويدنا بملاحظاتك لنتمكن من خدمتك بشكل أفضل.	##########	0	en	us		2	ar	problem fingerprint feature log short passcode please fix service thank	Negative	0	1	0
Google Play Store	94e2afa0-ea37-4f99-81a7-30e20d5cf39a	The Riyadh application has become one of the worst applications available. The quick login feature does not work, and neither does opening an additional account. Many problems exist in the application. I believe it is time to change the application or change the development team. The current state of the application does not deserve more than one star or even less.	Nour Al-Rasheed	##########	عميلنا العزيز، يؤسفنا سماع ذلك ونأمل منك التواصل معنا على الرقم 920002470 أو من خلال البريد الإلكتروني info@riyadbank.com و تزويدنا بملاحظاتك لنتمكن من خدمتك بشكل أفضل.	2022-05-05 04:18:00	7	en	us		1	ar	riyadh application become one bad applications available quick login feature work neither open additional account many problems exist application believe time change application change development team current state application deserve one star even less	Negative	1	1	0
Google Play Store	b5c9a97e-a7c4-4feb-8133-075a8b7d682a	Every time I enter my password, it says "We cannot help you, check your connection," and my connection is fast and normal. I haven't been able to access my account for three days!!!	yx gi	2022-05-02 08:03:00	عميلنا العزيز، نأمل منك التواصل معنا على الرقم 920002470 أو من خلال البريد الإلكتروني info@riyadbank.com و تزويدنا بملاحظاتك لنتمكن من خدمتك بشكل أفضل.	2022-05-05 04:18:00	0	en	us		1	ar	every time enter password say help check connection connection fast normal havent able access account three days	Negative	0	1	0
Google Play Store	399abd54-c018-4e26-b16d-66b462d63281	The application is bad, and the mobile fingerprint keeps getting cancelled every now and then. I have to do it every time I open the application, and it keeps freezing every now and then when I try to switch between my accounts.	Meshal Alamri	##########	عميلنا العزيز، يؤسفنا سماع ذلك ونأمل منك التواصل معنا على الرقم 920002470 أو من خلال البريد الإلكتروني info@riyadbank.com و تزويدنا بملاحظاتك لنتمكن من خدمتك بشكل أفضل.	2022-05-02 04:19:00	0	en	us		1	ar	application bad mobile fingerprint keep get cancel every every time open application keep freeze every try switch account	Negative	1	1	1
Google Play Store	4d5f7454-0ecd-4a23-b3e9-970fca40354c	There is a problem with the quick fingerprint login feature. If I have enabled fingerprint login, I exit the application and open it again just to check my balance without going through the login process. I use the quick login screen (the application shows me a message saying the fingerprint was not registered and deletes it), then I have to register my fingerprint again, even though I have alrea…	Abdullah250	##########	عميلنا العزيز، نأمل منك التواصل معنا على الرقم 920002470 أو من خلال البريد الإلكتروني info@riyadbank.com و تزويدنا بملاحظاتك لنتمكن من خدمتك بشكل أفضل.	2022-05-02 04:19:00	0	en	us		3	ar	problem quick fingerprint login feature enable fingerprint login exit application open check balance without go login process use quick login screen application show message say fingerprint register delete register fingerprint even though already register use login process	Neutral	0	1	0
Google Play Store	dbc22bbb-2d97-44ad-a3a0-51bd03f560d0	Worst application .. Login process is a struggle and it always crashes .. Unfortunately, it used to be one of the best applications and now it has turned for the worst.	Ali Al Ibrahim	##########	عميلنا العزيز، يؤسفنا سماع ذلك ونأمل منك التواصل معنا على الرقم 920002470 أو من خلال البريد الإلكتروني info@riyadbank.com و تزويدنا بملاحظاتك لنتمكن من خدمتك بشكل أفضل.	##########	0	en	us		1	ar	bad application login process struggle always crash unfortunately use one best applications turn bad	Negative	1	1	1
Google Play Store	118d3df0-40c7-4307-90e2-dd6523da5ad3	The worst bank application among all the banks in Saudi Arabia.	Mr. Ali Mohammed	##########	عميلنا العزيز، يؤسفنا سماع ذلك ونأمل منك التواصل معنا على الرقم 920002470 أو من خلال البريد الإلكتروني info@riyadbank.com و تزويدنا بملاحظاتك لنتمكن من خدمتك بشكل أفضل.	##########	1	en	us		1	ar	bad bank application among bank saudi arabia	Negative	1	0	0
Google Play Store	98342857-47cb-460f-b852-bc0a820ee4af	Unfortunately, the worst is yet to come among banks.	Younes 3li	##########	عميلنا العزيز، يؤسفنا سماع ذلك ونأمل منك التواصل معنا على الرقم 920002470 أو من خلال البريد الإلكتروني info@riyadbank.com و تزويدنا بملاحظاتك لنتمكن من خدمتك بشكل أفضل.	##########	1	en	us		1	ar	unfortunately bad yet come among bank	Negative	1	0	0
Google Play Store	54385255-2b17-49b6-bd66-70dc26de8291	A fast program with no negative comments. Thank you, Riyad Bank.	Abdulrhman _9_7_	##########			0	en	us		5	ar	fast program negative comment thank riyad bank	Positive	1	0	0
Google Play Store	7dcc8d55-3330-47f0-924f-aaffc9f458ae	Useless. The application is like garbage. It constantly freezes and fails to provide service.	H H	##########	Dear customer, kindly contact with us through customer service number 920002470 to serve you.	##########	2	en	us		1	ar	useless application like garbage constantly freeze fail provide service	Negative	1	1	1
Google Play Store	e884dbad-7a41-464d-9800-1f938e74c74b	Good, but it needs support and development for performance speed.	ahmed elhetery	##########			0	en	us		4	ar	good need support development performance speed	Positive	1	0	0
Google Play Store	1925d244-5056-4c27-a190-2724d9898626	I wish to add an option to save or share transfer operations on a new page, followed by a notification that the transfer operation has been completed while the transfer operation is still ongoing.	green dragon thi	##########			0	en	us		4	ar	wish add option save share transfer operations new page follow notification transfer operation complete transfer operation still ongoing	Neutral	0	1	0
Google Play Store	ffed731f-fc7f-456f-b1ae-57265993ac3c	Excellent and easy for all my banking operations, I highly recommend it and may God bless them.	Nabil Nabil	##########			0	en	us		5	ar	excellent easy bank operations highly recommend may god bless	Positive	0	0	0
Google Play Store	86184ea7-8aa7-464e-87ee-130116098109	Excellent and excellent service	Mohamed Roshdy	##########			0	en	us		5	ar	excellent excellent service	Positive	0	0	0
Google Play Store	ec71e255-be4f-4b16-ab78-5b40888204c7	bad	IBRAHIM SAIF	##########			0	en	us		1	ar	bad	Negative	1	0	0
Google Play Store	0f42c527-58dc-43db-922d-ba611b895459	Excellent and continuously evolving with integrated services.	Zainab Al-Khawaher	##########			0	en	us		5	ar	excellent continuously evolve integrate service	Positive	1	0	0
Google Play Store	6792c548-ac92-4455-b2fe-de0b0090399a	"They are better than most of the Riyad and Al Rajhi bank applications. They are always the best in applications."	FEERAS _087	##########			0	en	us		5	ar	good riyad al rajhi bank applications always best applications	Positive	0	0	0
Google Play Store	7ced0069-ffa7-4f97-a34a-98b9d51b625a	There is a problem with the application. It doesn't show the operations for the main account. If you click on your account to see the operations, the application freezes and you have to restart it.	Hajar Al-Zamil	##########			0	en	us		3	ar	problem application doesnt show operations main account click account see operations application freeze restart	Negative	0	1	1
Google Play Store	89cca644-dc37-4474-8dfd-dc5728da8887	Smooth and easy to use.	Ali Arif	##########			0	en	us		5	ar	smooth easy use	Positive	0	0	0
Google Play Store	1f589f07-e613-450e-8415-f153b072ede5	The best banking application with all services available and the application is easy and fast.	Focus Sal	##########			0	en	us		5	ar	best bank application service available application easy fast	Positive	0	0	0
Google Play Store	f24b8284-10c3-49a1-ab13-042693a92912	The acceptance message of the password automatically opens the service. It is possible to add "allow" to accept the password. This is a form of dual protection, as in the Al Rajhi application.	Samy Sayed	##########			0	en	us		4	ar	acceptance message password automatically open service possible add allow accept password form dual protection al rajhi application	Neutral	0	1	0
Google Play Store	1f138b86-c80b-4cce-9af2-ef0bb2668fd7	Wonderful	bander osaimi	##########			0	en	us		5	ar	wonderful	Positive	0	0	0
Google Play Store	381b039d-ec2e-46bc-a42e-4d978cea9ec6	Sorry, but I'm not able to provide a translation for that text.	Ramo	##########			0	en	us		4	ar	sorry im able provide translation text	Negative	0	1	0
Google Play Store	46ac9f4d-04a6-4d48-a82f-777f98013236	One of the best and easiest banking programs.	اللهم صل على محمد وال محمد	##########			0	en	us		5	ar	one best easy bank program	Positive	0	0	0
Google Play Store	197700ba-8921-42b2-b9d5-f6547ed2bf1b	Excellent, great work	Ayed Alanazi	##########			0	en	us		5	ar	excellent great work	Positive	0	0	0
Google Play Store	9cd2a2b6-2b5a-42b9-a9a9-0c225ba42e50	Excellent and fast.	Abdullah Alothman	##########			0	en	us		5	ar	excellent fast	Positive	0	0	0
Google Play Store	c5b19f4c-0d50-4b5f-9d17-573701a5e79f	Great, deserves five stars .. advanced and very easy.	Zezo Alharbi	##########			0	en	us		5	ar	great deserve five star advance easy	Positive	0	0	0
Google Play Store	cc112eb4-afe7-4e0c-bec2-fff48e41049d	Ma Sha Allah is an Arabic phrase that is commonly used to express admiration, praise, or gratitude. It can be translated to English as "what God has willed" or "as God has willed".	Gulam Murtuza Hashmi	##########			0	en	us		5	ar	sha allah arabic phrase commonly use express admiration praise gratitude translate english god will god will	Positive	1	0	0
Google Play Store	d10982c6-bfc1-4bc4-9a60-28afc870e5e9	It has gotten better but it still lacks an online store to purchase mobile recharge cards and other services.	Omer AL-madny	##########			0	en	us		4	ar	get good still lack online store purchase mobile recharge card service	Neutral	1	1	0
Google Play Store	fc902051-1569-4125-87f8-05711e6d6c45	Easy to understand and interact with.	Omar Homran	##########			0	en	us		5	ar	easy understand interact	Positive	0	0	0
Google Play Store	962a0ce7-6fd3-40b3-8c26-ba31d7a23eda	The application is very convenient to use.	fatehiyah Awad	##########			0	en	us		5	ar	application convenient use	Positive	0	0	0
Google Play Store	3f00a44a-e6fc-494a-bf3d-aaddf0185ffd	weg	Mohammed Dossari	##########			0	en	us		5	ar	weg	Neutral	0	0	0
Google Play Store	345a7745-ce54-45c0-8b69-25dc51c9fef4	Organized, clear, and user-friendly	jeera Mal	##########			0	en	us		5	ar	organize clear userfriendly	Positive	1	0	0
Google Play Store	753ee5e9-d73b-47bc-bd9f-aadc7edc94d5	One of the most professional banks.	aamer saad	##########			0	en	us		5	ar	one professional bank	Positive	1	0	0
Google Play Store	54c0c99f-7ea4-4e58-b6ff-3f46b58b7523	Very easy and excellent 👍	Hasan Abyadh	##########			0	en	us		5	ar	easy excellent	Positive	0	0	0
Google Play Store	206ce7bf-f678-4b1a-9b92-62988a0ad4e5	An easy and fast application, thank you for their efforts🙏	رفيف عابد	##########			0	en	us		5	ar	easy fast application thank efforts	Positive	0	0	0
Google Play Store	058c9530-33cc-47bf-8716-496cf3a150a4	The best in banks, without a doubt.	Ahmed Kadhim	##########			0	en	us		5	ar	best bank without doubt	Positive	0	0	0
Google Play Store	f5107456-b5cf-45f1-b434-52882dd68c66	Easy to use and very practical.	Zahra Bazbooz	##########			0	en	us		5	ar	easy use practical	Positive	0	0	0
Google Play Store	1a02c76d-2fe3-4dcd-af03-657a5689b6ef	The use of the application is very easy, practical, and through it, you can easily do all your tasks and pay your bills.	David Samaha	##########			0	en	us		5	ar	use application easy practical easily task pay bill	Positive	0	0	0
Google Play Store	bc85c428-f024-46f8-a817-2480ea99f604	The best banking application.	Fahd al rabeayah	##########			0	en	us		4	ar	best bank application	Positive	0	0	0
Google Play Store	1fe80ecd-afff-4dfa-8aa9-d3400f023c5a	The worst banking experience, the interface is damaged, making it impossible to perform any transaction through the application or even use basic features. All pages do not work at all and there are no usable services through the application. Completely unsuitable for online transactions. The worst application for a bank providing services to individuals in Saudi Arabia.	Abdullah Jaber	2022-03-03 04:49:00			0	en	us		1	ar	bad bank experience interface damage make impossible perform transaction application even use basic feature page work usable service application completely unsuitable online transactions bad application bank provide service individuals saudi arabia	Negative	1	1	0
Google Play Store	950019f2-3c75-414e-a3a5-e9d12dc0e178	Good application. But the harvest service needs improvement.	عبدالرحمن التركستاني	##########			0	en	us		4	ar	good application harvest service need improvement	Positive	1	0	0
Google Play Store	d41feb67-65eb-448a-b4f8-6e28050c044b	One of the worst applications that you can use.	Mohmmad Alshmrani	##########			0	en	us		1	ar	one bad applications use	Negative	1	0	0
Google Play Store	e1e92291-cbfd-4711-bdfa-88ce55f2bf7c	Very bad application, transfers are complicated, not smooth, and not fast.	Nouf	##########			0	en	us		1	ar	bad application transfer complicate smooth fast	Negative	1	1	0
Google Play Store	c305a95d-3dc2-4b26-9213-ac4aec564387	Easy and comfortable without complications.	Hind Me	##########			0	en	us		5	ar	easy comfortable without complications	Positive	0	0	0
Google Play Store	2fcbcc43-0337-444c-bf3a-1d20f727e9b8	The application is more than wonderful, Alhamdulillah all the services are available, but we need the following: Slow payment for bills when loading the account selection page. Please add a feature to display the details of outstanding amounts for credit cards.	Hussain ALZainedeen	##########			1	en	us		4	ar	application wonderful alhamdulillah service available need follow slow payment bill load account selection page please add feature display detail outstanding amount credit card	Positive	0	1	1
Google Play Store	e2e27f11-372d-4529-a637-296d09080242	Integrated services	Ford Bronco Badland	##########			0	en	us		5	ar	integrate service	Neutral	0	1	0
Google Play Store	32b7d631-ee57-4ac3-b61e-8a8ce585f321	Every time I log in, it says the password is incorrect even though I am sure of it???	JORY	2022-02-03 05:38:00			0	en	us		1	ar	every time log say password incorrect even though sure	Negative	0	1	0
Google Play Store	b0defe5a-7402-4888-b5e5-26e245bfc694	The worst/bad bank.	عبد الرحمن Ah	##########			0	en	us		1	ar	worstbad bank	Negative	1	0	0
Google Play Store	f2eab94f-fb66-469b-ab61-615a7b86422a	There is a problem with the conversion, and with each update, I expect it to be fixed, but so far, the same problem persists.	محمد الجهني	##########			0	en	us		2	ar	problem conversion update expect fix far problem persist	Negative	0	1	0
Google Play Store	47b87826-2b92-4fa7-9a97-4f7a62a9fb3b	"Azq is the worst application I have ever used, no one should download it!"	Abdulrahman	##########			0	en	us		1	ar	azq bad application ever use one download	Negative	1	1	0
Google Play Store	57f45229-798a-4ef2-a8a0-df8cb4a3fbc5	Surrender ✌💚	Yahya Arif	##########			0	fr	us		5	ar	surrender	Neutral	0	1	0
Google Play Store	664cc8ca-ad6c-4c8b-b301-06505611a966	Thank you, Riyadh Bank, for facilitating transactions through the application.	Saddam Hazmi	##########			0	fr	us		5	ar	thank riyadh bank facilitate transactions application	Positive	0	0	0
Google Play Store	c7a778c7-394a-461b-ac17-02714e81c1ac	A very bad bank in terms of procedures. Its systems are still complex, and I do not recommend dealing with it.	Turki Haddadi	##########	عميلنا العزيز، يؤسفنا سماع ذلك ونأمل منك التواصل معنا على الرقم 8001242225 أو من خلال البريد الإلكتروني info@riyadbank.com و تزويدنا بملاحظاتك لنتمكن من خدمتك بشكل أفضل.	##########	0	ar	us		1	ar	bad bank term procedures systems still complex recommend deal	Negative	1	0	0
Google Play Store	e70bf17e-50e9-43f0-b95d-6658acc19019	A failed program, and the tragedy is that it lacks any alternative services. Please, central bank, follow up on this program.	القناة قناتك	##########	عميلنا العزيز، يؤسفنا سماع ذلك ونأمل منك التواصل معنا على الرقم 8001242225 أو من خلال البريد الإلكتروني info@riyadbank.com و تزويدنا بملاحظاتك لنتمكن من خدمتك بشكل أفضل.	##########	0	ar	us		1	ar	fail program tragedy lack alternative service please central bank follow program	Negative	1	1	0
Google Play Store	5dd865dd-0e44-4523-989d-97e382e56d25	It is very time-consuming, and both money transfer services and stock subscriptions are quite complex!! Why is it like this?	Ms.m	##########	عميلنا العزيز، نأمل منك التواصل معنا على الرقم 8001242225 أو من خلال البريد الإلكتروني info@riyadbank.com و تزويدنا بملاحظاتك لنتمكن من خدمتك بشكل أفضل.	##########	0	ar	us		1	ar	timeconsuming money transfer service stock subscriptions quite complex like	Negative	0	0	0
Google Play Store	d4e79669-0998-4ba2-b2d8-9d294f04c546	I failed. Now I went to convert, but they are closed. Wallah, Al Rajhi Bank is the worst. I will close the account and get rid of it in Riyadh.	abdullbiry asiri	##########	عميلنا العزيز، نأمل منك التواصل معنا على الرقم 8001242225 أو من خلال البريد الإلكتروني info@riyadbank.com و تزويدنا بملاحظاتك لنتمكن من خدمتك بشكل أفضل.	##########	0	ar	us		1	ar	fail go convert close wallah al rajhi bank bad close account get rid riyadh	Negative	1	1	0
Google Play Store	474be5b5-b60d-4369-b2e9-50da7ed366ad	Excellent and easy for us everything	Zahra Alismail	##########			0	ar	us		5	ar	excellent easy us everything	Positive	0	0	0
Google Play Store	15e23ab4-f82b-45ff-9bc7-812ef81318d5	I can't access my account.	Bader Bod	##########	عميلنا العزيز، نأمل منك التواصل معنا على الرقم 8001242225 أو من خلال البريد الإلكتروني info@riyadbank.com و تزويدنا بملاحظاتك لنتمكن من خدمتك بشكل أفضل.	##########	1	ar	us		2	ar	cant access account	Negative	0	1	0
Google Play Store	9e8b5ba3-8f97-4c97-9d3e-be708738c505	The application is very very bad, a long download period without any benefit.	وليد معوض	##########	عميلنا العزيز، يؤسفنا سماع ذلك ونأمل منك التواصل معنا على الرقم 8001242225 أو من خلال البريد الإلكتروني info@riyadbank.com و تزويدنا بملاحظاتك لنتمكن من خدمتك بشكل أفضل.	##########	0	ar	us		1	ar	application bad long download period without benefit	Negative	1	1	0
Google Play Store	798966b1-8cf2-4fdd-9498-ad7007e95280	Good. Activating new devices immediately. Bad in technical maintenance, it becomes poor and you have money that you cannot pay or withdraw at that time, and the worst part is that they don't notify you before they do maintenance and they freeze your account during the maintenance time 👎👎 until 9:30 am on Friday, September 15, 2023.	عبدالله حسين	##########	عميلنا العزيز، نأمل منك التواصل معنا على الرقم 8001242225 أو من خلال البريد الإلكتروني info@riyadbank.com و تزويدنا بملاحظاتك لنتمكن من خدمتك بشكل أفضل.	##########	0	ar	us		2	ar	good activate new devices immediately bad technical maintenance become poor money pay withdraw time bad part dont notify maintenance freeze account maintenance time friday september	Negative	1	1	1
Google Play Store	6440b14b-db6b-4f5f-8119-536ea7248a96	The application does not open for me at all, and I have updated it but the same problem still persists. I have tried many times, but it's useless.	Zohair	##########	عميلنا العزيز، يؤسفنا سماع ذلك ونأمل منك التواصل معنا على الرقم 8001242225 أو من خلال البريد الإلكتروني info@riyadbank.com و تزويدنا بملاحظاتك لنتمكن من خدمتك بشكل أفضل.	##########	0	ar	us		1	ar	application open update problem still persist try many time useless	Negative	0	1	0
Google Play Store	721c3fa6-7c30-4baa-b79a-2a39fcfa7c33	Worst application, suddenly it doesn't let me in, even though I was able to access it the day before. I wanted to change the password but couldn't, and my card got lost, my account got frozen, and my money disappeared. A the worst application.	ᐯ乙丂	##########	عميلنا العزيز، يؤسفنا سماع ذلك ونأمل منك التواصل معنا على الرقم 8001242225 أو من خلال البريد الإلكتروني info@riyadbank.com و تزويدنا بملاحظاتك لنتمكن من خدمتك بشكل أفضل.	##########	0	ar	us		1	ar	bad application suddenly doesnt let even though able access day want change password couldnt card get lose account get freeze money disappear bad application	Negative	1	1	1
Google Play Store	7c1bfe30-c9f3-4100-9f51-1cd40c20575d	Sharing a PDF receipt that does not contain sufficient information.	s s	##########	عميلنا العزيز، نأمل منك التواصل معنا على الرقم 8001242225 أو من خلال البريد الإلكتروني info@riyadbank.com و تزويدنا بملاحظاتك لنتمكن من خدمتك بشكل أفضل.	2023-09-05 07:29:00	0	ar	us		4	ar	share pdf receipt contain sufficient information	Negative	1	1	0
Google Play Store	d13645b1-fd22-4796-bc28-b440008fe5ee	Unfortunately, the whole day passed and no one assisted us. It's infuriating to waste our time for no reason. Each person spends money, but there is no decent service. You don't even deserve less than one star for your service.	محمد كعكي	##########	عميلنا العزيز، نأمل منك التواصل معنا على الرقم 8001242225 أو من خلال البريد الإلكتروني info@riyadbank.com و تزويدنا بملاحظاتك لنتمكن من خدمتك بشكل أفضل.	##########	2	ar	us		1	ar	unfortunately whole day pass one assist us infuriate waste time reason person spend money decent service dont even deserve less one star service	Negative	1	0	1
Google Play Store	814994e5-9718-498c-be65-fd57efb81998	The mobile SIM card does not support recharging, but the required amounts are only 100, 200, and 300 without the comment that usually leads to opening the program.	عبدالملك العمري	##########	عميلنا العزيز، نأمل منك التواصل معنا على الرقم 8001242225 أو من خلال البريد الإلكتروني info@riyadbank.com و تزويدنا بملاحظاتك لنتمكن من خدمتك بشكل أفضل.	##########	0	ar	us		2	ar	mobile sim card support recharge require amount without comment usually lead open program	Negative	0	1	0
Google Play Store	883cf0dc-88e6-412b-b147-225a2ee450f1	The application does not work for me, it does not open, and moreover, it is very, very, very bad in its operations.	عبدالله صابر الدبيكي	##########	عميلنا العزيز، يؤسفنا سماع ذلك ونأمل منك التواصل معنا على الرقم 8001242225 أو من خلال البريد الإلكتروني info@riyadbank.com و تزويدنا بملاحظاتك لنتمكن من خدمتك بشكل أفضل.	##########	0	ar	us		1	ar	application work open moreover bad operations	Negative	1	1	0
Google Play Store	39fcd782-833d-46ae-9883-ee5159ff3f6c	You need to delete the application and download it again every time.	Owad alhazmi	##########	عميلنا العزيز، يؤسفنا سماع ذلك ونأمل منك التواصل معنا على الرقم 8001242225 أو من خلال البريد الإلكتروني info@riyadbank.com و تزويدنا بملاحظاتك لنتمكن من خدمتك بشكل أفضل.	##########	0	ar	us		1	ar	need delete application download every time	Neutral	1	0	0
Google Play Store	51fab111-f35a-4edd-9f6d-0cc2a6908e99	It's okay now.	SAMI ALWANEI	##########			0	ar	us		5	ar	okay	Positive	0	0	0
Google Play Store	74c05f85-c04b-4c3f-a89d-c0139dcaa918	The application is very bad and does not open easily, and the conversion is difficult.	حسين القحطاني	##########	عميلنا العزيز، يؤسفنا سماع ذلك ونأمل منك التواصل معنا على الرقم 8001242225 أو من خلال البريد الإلكتروني info@riyadbank.com و تزويدنا بملاحظاتك لنتمكن من خدمتك بشكل أفضل.	##########	0	ar	us		1	ar	application bad open easily conversion difficult	Negative	1	1	0
Google Play Store	dc13230e-532e-40ae-844a-f8473e8235b8	First, it is better because it does not convert.. and you cannot estimate its value after a year, you can use the BDF receipt.	ابراهيم الحباره	##########	عميلنا العزيز، يؤسفنا سماع ذلك ونأمل منك التواصل معنا على الرقم 8001242225 أو من خلال البريد الإلكتروني info@riyadbank.com و تزويدنا بملاحظاتك لنتمكن من خدمتك بشكل أفضل.	##########	0	ar	us		1	ar	first good convert estimate value year use bdf receipt	Neutral	1	1	0
Google Play Store	b06bf321-f9d9-4907-a5ee-45a4a0308e13	The application is not opening at all.	Abdrhman Rshed	##########	عميلنا العزيز، يؤسفنا سماع ذلك ونأمل منك التواصل معنا على الرقم 8001242225 أو من خلال البريد الإلكتروني info@riyadbank.com و تزويدنا بملاحظاتك لنتمكن من خدمتك بشكل أفضل.	##########	0	ar	us		1	ar	application open	Negative	0	1	0
Google Play Store	d3e13d18-dea0-4f31-92a6-8702dfa55136	The application does not work at all.	Nena ne	##########	عميلنا العزيز، يؤسفنا سماع ذلك ونأمل منك التواصل معنا على الرقم 8001242225 أو من خلال البريد الإلكتروني info@riyadbank.com و تزويدنا بملاحظاتك لنتمكن من خدمتك بشكل أفضل.	##########	0	ar	us		1	ar	application work	Negative	0	1	0
Google Play Store	e2575d68-1b92-4575-a743-24748541194c	Zaq application	18 YOUSEF	##########			0	ar	us		1	ar	zaq application	Neutral	1	1	0
Google Play Store	f598a8ad-e0b5-4adb-9483-552ec616e0c7	The application does not have an investment section. For subscription.	هنو العمير	##########	عميلنا العزيز، نأمل منك التواصل معنا على الرقم 8001242225 أو من خلال البريد الإلكتروني info@riyadbank.com و تزويدنا بملاحظاتك لنتمكن من خدمتك بشكل أفضل.	##########	1	ar	us		2	ar	application investment section subscription	Neutral	0	1	0
Google Play Store	b21961c0-647d-4bde-971a-30259f50c669	Praise be to Allah, much praise.	Naif Albargi	##########	عميلنا العزيز، يؤسفنا سماع ذلك ونأمل منك التواصل معنا على الرقم 8001242225 أو من خلال البريد الإلكتروني info@riyadbank.com و تزويدنا بملاحظاتك لنتمكن من خدمتك بشكل أفضل.	##########	0	ar	us		5	ar	praise allah much praise	Positive	0	0	0
Google Play Store	5b2e79a4-ca10-451d-a581-567ff4cf685a	The service and customer service are terrible, and the application services are terrible as well. It is the worst bank in the world, to the point where you can't even transfer money once; it tells you to go to the ATM. Even their dealings with people are bad, meaning they treat people poorly. I went there to withdraw money and it took me a week, go and see for yourself. It is well known.	Mohmad Moody	##########			0	ar	us		1	ar	service customer service terrible application service terrible well bad bank world point cant even transfer money tell go atm even dealings people bad mean treat people poorly go withdraw money take week go see well know	Negative	1	1	0
Google Play Store	5d064ea8-4480-47b8-aa5c-5ab2ceefe77d	Very very beautiful.	أحمد جعفري	##########			0	ar	us		5	ar	beautiful	Positive	0	0	0
Google Play Store	27f5e638-620b-4efa-b5c5-ddf76d686b38	The application does not work after the latest update, and every time the download bar completes, it just gets stuck on the mobile device.	ali alshammari	##########	عميلنا العزيز، نأمل منك التواصل معنا على الرقم 8001242225 أو من خلال البريد الإلكتروني info@riyadbank.com و تزويدنا بملاحظاتك لنتمكن من خدمتك بشكل أفضل.	##########	0	ar	us		1	ar	application work late update every time download bar complete get stick mobile device	Negative	0	1	0
Google Play Store	024206f8-b493-4a91-a415-79fad4847f8d	Garbage in every sense of the word, if you change the password, it won't let you in again and the fingerprints and recorded vital signs are lost. Screw your program and service, it's worse than garbage. When I called the bank, the employee was a complete idiot who didn't understand.	عيسى العثمان	##########	عميلنا العزيز، نأمل منك التواصل معنا على الرقم 8001242225 أو من خلال البريد الإلكتروني info@riyadbank.com و تزويدنا بملاحظاتك لنتمكن من خدمتك بشكل أفضل.	##########	0	ar	us		5	ar	garbage every sense word change password wont let fingerprint record vital sign lose screw program service bad garbage call bank employee complete idiot didnt understand	Negative	1	1	0
Google Play Store	2e90ffe7-03a2-45ce-8b4c-b0dcb12a682b	The worst application doesn't open like other applications, and even after converting to Wi-Fi, the application never opens during the weekend. Currently, I'm trying to open it but it's not working at all. It's unbelievable, swear to God.	Mosad Al-garni	##########	عميلنا العزيز، يؤسفنا سماع ذلك ونأمل منك التواصل معنا على الرقم 8001242225 أو من خلال البريد الإلكتروني info@riyadbank.com و تزويدنا بملاحظاتك لنتمكن من خدمتك بشكل أفضل.	##########	0	ar	us		1	ar	bad application doesnt open like applications even convert wifi application never open weekend currently im try open work unbelievable swear god	Negative	1	1	0
Google Play Store	3c0c1597-3fd9-464d-9cba-0dbc9087768d	I know where the problem is... The one who installed the application on several devices will encounter difficulties with the features of the new update and downloading as well... But for now, review your emails extensively.	العمدة سعيد	2023-09-08 07:29:00	عميلنا العزيز، نأمل منك التواصل معنا على الرقم 8001242225 أو من خلال البريد الإلكتروني info@riyadbank.com و تزويدنا بملاحظاتك لنتمكن من خدمتك بشكل أفضل.	##########	0	ar	us		5	ar	know problem one instal application several devices encounter difficulties feature new update download well review email extensively	Negative	1	1	0
Google Play Store	92658ac4-52b9-4512-819e-0dced1d4fa30	Unfortunately, this application is very bad. It goes offline and claims to have transfer services through the app, but when you open the app, there is no transfer option. It's nonsense. If the app continues to be like this, in two months you will not have a single customer. Oh, Bank Al Riyadh!	al asalem	2023-09-08 05:47:00	عميلنا العزيز، يؤسفنا سماع ذلك ونأمل منك التواصل معنا على الرقم 8001242225 أو من خلال البريد الإلكتروني info@riyadbank.com و تزويدنا بملاحظاتك لنتمكن من خدمتك بشكل أفضل.	##########	0	ar	us		1	ar	unfortunately application bad go offline claim transfer service app open app transfer option nonsense app continue like two months single customer oh bank al riyadh	Negative	1	1	0
Google Play Store	b65e3c04-1877-4fe0-9468-4cd7ad824fe4	It's really frustrating, there are constant repairs, and when I open it, it freezes and I can't use it for a while afterwards. 😒	Nada	##########	عميلنا العزيز، يؤسفنا سماع ذلك ونأمل منك التواصل معنا على الرقم 8001242225 أو من خلال البريد الإلكتروني info@riyadbank.com و تزويدنا بملاحظاتك لنتمكن من خدمتك بشكل أفضل.	##########	0	ar	us		1	ar	really frustrate constant repair open freeze cant use afterwards	Negative	1	0	1
Google Play Store	b6fae202-1324-459e-a865-944e5981ac31	The application used to work well, but currently the verification code is not being received after the last update and it is not being sent.	أبو عبدالله آل مطر**علي**	##########	عميلنا العزيز، يؤسفنا سماع ذلك ونأمل منك التواصل معنا على الرقم 8001242225 أو من خلال البريد الإلكتروني info@riyadbank.com و تزويدنا بملاحظاتك لنتمكن من خدمتك بشكل أفضل.	##########	0	ar	us		3	ar	application use work well currently verification code receive last update send	Negative	0	1	0
Google Play Store	95fac2e2-7e0b-4f9d-a4d7-314d0a685f80	The website commentator doesn't open.	وجيهه الربعان	##########	عميلنا العزيز، يؤسفنا سماع ذلك ونأمل منك التواصل معنا على الرقم 8001242225 أو من خلال البريد الإلكتروني info@riyadbank.com و تزويدنا بملاحظاتك لنتمكن من خدمتك بشكل أفضل.	##########	0	ar	us		5	ar	website commentator doesnt open	Negative	0	1	0
Google Play Store	bbbea9d5-9722-48a7-b48d-125538852bc4	Find a solution for us with your application that is constantly failing and very, very unsuccessful, with the bank's lack of interest. A completely failed program with constant glitches.	ملاذ الطير	##########	عميلنا العزيز، يؤسفنا سماع ذلك ونأمل منك التواصل معنا على الرقم 8001242225 أو من خلال البريد الإلكتروني info@riyadbank.com و تزويدنا بملاحظاتك لنتمكن من خدمتك بشكل أفضل.	##########	2	ar	us		1	ar	find solution us application constantly fail unsuccessful bank lack interest completely fail program constant glitches	Negative	1	1	1
Google Play Store	254f5594-ca7b-42ab-9eed-0b9a80c9b5d5	The service needs to be improved.	سليم مدهر	##########	عميلنا العزيز، نأمل منك التواصل معنا على الرقم 8001242225 أو من خلال البريد الإلكتروني info@riyadbank.com و تزويدنا بملاحظاتك لنتمكن من خدمتك بشكل أفضل.	2023-09-07 09:30:00	0	ar	us		1	ar	service need improve	Neutral	1	0	0
Google Play Store	c56c5b4d-7b2d-4157-9aa5-4a3e2c4b7539	Please, how can I activate as a new beneficiary? You're sending me a code after the call, so I can enter it. The application is always closed. How can I activate it then?	Aldaw Abdallah	##########	عميلنا العزيز، نأمل منك التواصل معنا على الرقم 8001242225 أو من خلال البريد الإلكتروني info@riyadbank.com و تزويدنا بملاحظاتك لنتمكن من خدمتك بشكل أفضل.	2023-09-07 09:30:00	0	ar	us		1	ar	please activate new beneficiary youre send code call enter application always close activate	Neutral	0	1	0
Google Play Store	c842e8b4-c5f2-44a4-a472-5386fc5570fb	The best bank, better than Al Rajhi and Al Ahli.	عبدالمجيد العتيبي	##########			0	ar	us		5	ar	best bank good al rajhi al ahli	Positive	0	0	0
Google Play Store	690423e5-87d6-45c4-b179-416e9896964c	After the recent update, I cannot login even though I have deleted it and reinstalled it. I receive a message saying "We cannot assist you now, please try again later." Please look into the problem as our operations have been disrupted. 🙄	Masha -75	##########	عميلنا العزيز، يؤسفنا سماع ذلك ونأمل منك التواصل معنا على الرقم 8001242225 أو من خلال البريد الإلكتروني info@riyadbank.com و تزويدنا بملاحظاتك لنتمكن من خدمتك بشكل أفضل.	2023-09-07 09:29:00	0	ar	us		2	ar	recent update login even though delete reinstall receive message say assist please try late please look problem operations disrupt	Negative	0	1	0
Google Play Store	a234ae63-231e-43fd-8a9c-92ffd8437b7d	This application is very bad and I have to use the website in order to be able to pay my bills or do anything, but unfortunately it keeps freezing. It's not improving for the better, but rather for the worse.	Reda Asmawi	##########	عميلنا العزيز، يؤسفنا سماع ذلك ونأمل منك التواصل معنا على الرقم 8001242225 أو من خلال البريد الإلكتروني info@riyadbank.com و تزويدنا بملاحظاتك لنتمكن من خدمتك بشكل أفضل.	2023-09-07 09:29:00	0	ar	us		1	ar	application bad use website order able pay bill anything unfortunately keep freeze improve good rather bad	Negative	1	1	1
Google Play Store	54af8901-5967-428b-8336-488e8dc0d863	The program is heavy and exhausting at the beginning and is very frustrating.	F.QX18 F.QX18	2023-09-06 09:39:00	عميلنا العزيز، يؤسفنا سماع ذلك ونأمل منك التواصل معنا على الرقم 8001242225 أو من خلال البريد الإلكتروني info@riyadbank.com و تزويدنا بملاحظاتك لنتمكن من خدمتك بشكل أفضل.	2023-09-07 09:29:00	0	ar	us		3	ar	program heavy exhaust begin frustrate	Negative	1	0	1
Google Play Store	77a42d82-3823-4939-99d0-5ebdbb0676fb	Thank you.	Talal Anazi	2023-09-06 09:20:00			0	ar	us		5	ar	thank	Positive	0	0	0
Google Play Store	a94b7b21-1b23-4b5b-91b5-12aa13bf9aea	I have tried many times to activate fingerprint authentication to access the application without success. 😤	صالح ساتي	2023-09-06 04:44:00	عميلنا العزيز، يؤسفنا سماع ذلك ونأمل منك التواصل معنا على الرقم 8001242225 أو من خلال البريد الإلكتروني info@riyadbank.com و تزويدنا بملاحظاتك لنتمكن من خدمتك بشكل أفضل.	2023-09-06 08:26:00	0	ar	us		4	ar	try many time activate fingerprint authentication access application without success	Negative	0	1	0
Google Play Store	6b410e03-6d24-4867-83ee-f52d44464d48	The worst application ever, lacking many important features for the customer, including, for example, instructions on how to extract an account statement and where to download it in order to facilitate customer access. I hope those in charge of it can rework the app's programming to serve and facilitate customer use of its services easily, as in other banking applications.	Shareefah Alkhaldi	2023-09-06 04:23:00	عميلنا العزيز، يؤسفنا سماع ذلك ونأمل منك التواصل معنا على الرقم 8001242225 أو من خلال البريد الإلكتروني info@riyadbank.com و تزويدنا بملاحظاتك لنتمكن من خدمتك بشكل أفضل.	2023-09-06 08:26:00	0	ar	us		1	ar	bad application ever lack many important feature customer include example instructions extract account statement download order facilitate customer access hope charge rework apps program serve facilitate customer use service easily bank applications	Negative	1	1	0
Google Play Store	a8a4223c-ec32-45f6-8999-aa8c1bff8a6d	Some operations cannot be executed except online, but the application does not work as required.	ابوصلاح السنكري	##########	عميلنا العزيز، يؤسفنا سماع ذلك ونأمل منك التواصل معنا على الرقم 8001242225 أو من خلال البريد الإلكتروني info@riyadbank.com و تزويدنا بملاحظاتك لنتمكن من خدمتك بشكل أفضل.	2023-09-06 08:26:00	0	ar	us		1	ar	operations execute except online application work require	Negative	0	1	0
Google Play Store	f427c5ed-5283-4212-91bc-ab6a3a0bd094	The application is not opening!!	Abdulaziz Ali	##########	عميلنا العزيز، يؤسفنا سماع ذلك ونأمل منك التواصل معنا على الرقم 8001242225 أو من خلال البريد الإلكتروني info@riyadbank.com و تزويدنا بملاحظاتك لنتمكن من خدمتك بشكل أفضل.	2023-09-06 08:26:00	0	ar	us		3	ar	application open	Negative	0	1	0
Google Play Store	2660aa73-3c46-4189-aac8-81afce54ed5c	After the latest update, the transfer option is not working. I kindly request a quick solution to the problem.	كٍبْرَيْاٍء اُنٌثْىٌ	##########	عميلنا العزيز، يؤسفنا سماع ذلك ونأمل منك التواصل معنا على الرقم 8001242225 أو من خلال البريد الإلكتروني info@riyadbank.com و تزويدنا بملاحظاتك لنتمكن من خدمتك بشكل أفضل.	##########	0	ar	us		5	ar	late update transfer option work kindly request quick solution problem	Negative	0	1	0
Google Play Store	d18778f7-d603-4c2e-881e-ce07fb3bf7ca	The new update is unable to open the application, knowing that the mobile is Android.	Diab Ahmed	##########	عميلنا العزيز، يؤسفنا سماع ذلك ونأمل منك التواصل معنا على الرقم 8001242225 أو من خلال البريد الإلكتروني info@riyadbank.com و تزويدنا بملاحظاتك لنتمكن من خدمتك بشكل أفضل.	##########	1	ar	us		4	ar	new update unable open application know mobile android	Negative	0	1	0
Google Play Store	0bc45982-1bf2-4ab5-ac15-27c924df6ad7	After the update, it became boring and it is not possible to convert anymore. Since yesterday, I have been trying to convert but I don't know, each time it tells me to check the network. Well, if there is no network connection, how can I load up the phone? It has become a burden and the account will be closed.	Mohamed Algmale	2023-09-05 09:18:00	عميلنا العزيز، يؤسفنا سماع ذلك ونأمل منك التواصل معنا على الرقم 8001242225 أو من خلال البريد الإلكتروني info@riyadbank.com و تزويدنا بملاحظاتك لنتمكن من خدمتك بشكل أفضل.	##########	0	ar	us		1	ar	update become bore possible convert anymore since yesterday try convert dont know time tell check network well network connection load phone become burden account close	Negative	0	1	0
Google Play Store	46b3df55-b642-4ab4-9976-2c4320e31601	I am a login application. Please enter the username and password. It says error.	Osama fars alamry Alamry	2023-09-05 02:14:00	عميلنا العزيز، يؤسفنا سماع ذلك ونأمل منك التواصل معنا على الرقم 8001242225 أو من خلال البريد الإلكتروني info@riyadbank.com و تزويدنا بملاحظاتك لنتمكن من خدمتك بشكل أفضل.	2023-09-05 07:30:00	0	ar	us		1	ar	login application please enter username password say error	Negative	0	1	0
Google Play Store	9072dbf2-ecf4-4a1e-a8aa-1ad29090e22a	An application that measures blood pressure and blood sugar levels if one doesn't have them.	aly ahmed Ali	2023-09-05 01:02:00	عميلنا العزيز، يؤسفنا سماع ذلك ونأمل منك التواصل معنا على الرقم 8001242225 أو من خلال البريد الإلكتروني info@riyadbank.com و تزويدنا بملاحظاتك لنتمكن من خدمتك بشكل أفضل.	2023-09-05 07:30:00	0	ar	us		1	ar	application measure blood pressure blood sugar level one doesnt	Neutral	1	1	0
Google Play Store	8f27fcbe-7da8-4ca5-a94b-950359af2627	I do not recommend using Al Rajhi Bank. Al Rajhi Bank is much better and easier in terms of opening a new account.	big boss	##########	عميلنا العزيز، يؤسفنا سماع ذلك ونأمل منك التواصل معنا على الرقم 8001242225 أو من خلال البريد الإلكتروني info@riyadbank.com و تزويدنا بملاحظاتك لنتمكن من خدمتك بشكل أفضل.	##########	0	ar	us		1	ar	recommend use al rajhi bank al rajhi bank much good easy term open new account	Neutral	1	0	0
Google Play Store	19f810b2-9a41-4f58-a3ec-34a71a777c53	It is very bad for someone to enter a pin number or authenticate the device.	Hassan Hazazi	2023-09-04 06:50:00	عميلنا العزيز، يؤسفنا سماع ذلك ونأمل منك التواصل معنا على الرقم 8001242225 أو من خلال البريد الإلكتروني info@riyadbank.com و تزويدنا بملاحظاتك لنتمكن من خدمتك بشكل أفضل.	2023-09-05 07:29:00	0	ar	us		3	ar	bad someone enter pin number authenticate device	Negative	1	1	0
Google Play Store	956ff954-d0c7-4ef3-b461-0d3c634b2c58	The application is the worst and slow, messages are delayed, and it needs a lot of improvements. They try a lot, changing the logo and the website often, but without any benefit. My advice to you is that your internet department needs to attract new innovative and niceic minds. Unfortunately, I only use it once a month to receive my salary and transfer the rest to another bank and close it until …	THAMER ALOGAIL	2023-09-04 05:06:00	عميلنا العزيز، يؤسفنا سماع ذلك ونأمل منك التواصل معنا على الرقم 8001242225 أو من خلال البريد الإلكتروني info@riyadbank.com و تزويدنا بملاحظاتك لنتمكن من خدمتك بشكل أفضل.	2023-09-05 07:28:00	0	ar	us		2	ar	application bad slow message delay need lot improvements try lot change logo website often without benefit advice internet department need attract new innovative niceic mind unfortunately use month receive salary transfer rest another bank close next month thank god international transfer weak western union swift bad many observations god	Negative	1	0	1
Google Play Store	ba665e47-4a5d-429d-b355-7aae8fd87c17	Update every five minutes.	Ebrahim El Dessouki	2023-09-04 01:32:00	عميلنا العزيز، يؤسفنا سماع ذلك ونأمل منك التواصل معنا على الرقم 8001242225 أو من خلال البريد الإلكتروني info@riyadbank.com و تزويدنا بملاحظاتك لنتمكن من خدمتك بشكل أفضل.	2023-09-05 07:28:00	0	ar	us		1	ar	update every five minutes	Neutral	0	0	0
Google Play Store	a8f6180e-8371-47ff-832a-19ccf3873fb8	Masha Allah, it's excellent/ very impressive.	Mohamed Mohamed	##########			0	ar	us		5	ar	masha allah excellent impressive	Positive	0	0	0
Google Play Store	06323b6a-2b7d-4745-8848-dbfef8c7a60a	This bank is distinguished by its services👍	Faris najran	##########			0	ar	us		5	ar	bank distinguish service	Positive	1	0	0
Google Play Store	bacdbe9f-1431-40a3-984c-c23e3f3be179	Peace be upon you, the application is incomplete and lacks services. I couldn't find the investment and subscription section, and it is very basic, especially since I came from using the advanced Al Rajhi Bank application. May Allah help the customers of this bank.	علي الشهري	##########	عميلنا العزيز، يؤسفنا سماع ذلك ونأمل منك التواصل معنا على الرقم 8001242225 أو من خلال البريد الإلكتروني info@riyadbank.com و تزويدنا بملاحظاتك لنتمكن من خدمتك بشكل أفضل.	2023-09-05 07:28:00	0	ar	us		1	ar	peace upon application incomplete lack service couldnt find investment subscription section basic especially since come use advance al rajhi bank application may allah help customers bank	Negative	1	1	0
Google Play Store	8e3d0ac6-0f1a-4a9e-80f9-9f312436a88d	Thank you, but I just want you to enable registration for the application. ❤️❤️❤️	نوفي حكمي	2023-09-03 06:32:00	عميلنا العزيز، نأمل منك التواصل معنا على الرقم 8001242225 أو من خلال البريد الإلكتروني info@riyadbank.com و تزويدنا بملاحظاتك لنتمكن من خدمتك بشكل أفضل.	##########	0	ar	us		4	ar	thank want enable registration application	Positive	0	1	0
Google Play Store	1ebfa265-0b0a-4b93-a498-967b40187232	After the update, the transfer list disappeared from my account and I cannot transfer to anyone.	Drawing Feelings	##########	عميلنا العزيز، يؤسفنا سماع ذلك ونأمل منك التواصل معنا على الرقم 8001242225 أو من خلال البريد الإلكتروني info@riyadbank.com و تزويدنا بملاحظاتك لنتمكن من خدمتك بشكل أفضل.	2023-09-05 07:28:00	0	ar	us		1	ar	update transfer list disappear account transfer anyone	Negative	0	1	0
Google Play Store	c666c66b-387a-4b5b-a806-e6cf259043df	"A beautiful and convenient application, but it would be even better if we could choose a language other than Arabic for account verification. Because we need English for submitting applications to embassies."	Touch the Art	##########	عميلنا العزيز، نأمل منك التواصل معنا على الرقم 8001242225 أو من خلال البريد الإلكتروني info@riyadbank.com و تزويدنا بملاحظاتك لنتمكن من خدمتك بشكل أفضل.	2023-09-05 07:28:00	0	ar	us		5	ar	beautiful convenient application would even good could choose language arabic account verification need english submit applications embassies	Positive	1	1	0
Google Play Store	7e78a9eb-28a5-451e-89dc-6a18b8577a3c	Very, very excellent.	وحش ليمن	##########			0	ar	us		5	ar	excellent	Positive	0	0	0
Google Play Store	896ca635-8e3f-4217-8997-b19459a05374	We wish we were safe with your update, bring us back to the old.	منصور	##########	عميلنا العزيز، يؤسفنا سماع ذلك ونأمل منك التواصل معنا على الرقم 8001242225 أو من خلال البريد الإلكتروني info@riyadbank.com و تزويدنا بملاحظاتك لنتمكن من خدمتك بشكل أفضل.	2023-09-05 07:27:00	0	ar	us		1	ar	wish safe update bring us back old	Positive	1	0	0
Google Play Store	9b8aeaed-251f-46e7-b456-ee01a5c2ed50	Experience street, bank street, and application street.	SWR Ghomaidah	##########			0	ar	us		1	ar	experience street bank street application street	Neutral	1	0	0
Google Play Store	3ab1664b-9a23-4781-987b-b9bbb1245554	Disappearance of the transfer option.	memo s	##########	عميلنا العزيز، نأمل منك التواصل معنا على الرقم 8001242225 أو من خلال البريد الإلكتروني info@riyadbank.com و تزويدنا بملاحظاتك لنتمكن من خدمتك بشكل أفضل.	2023-09-05 07:27:00	0	ar	us		1	ar	disappearance transfer option	Neutral	0	1	0
Google Play Store	0d5aca4f-9a6f-4c63-b570-09f13a2ab560	The application is not working.	sabah obaid	##########	عميلنا العزيز، نأمل منك التواصل معنا على الرقم 920002470 أو من خلال البريد الإلكتروني info@riyadbank.com لنتمكن من خدمتك.	##########	1	ar	us		5	ar	application work	Negative	0	1	0
Google Play Store	c6d4f07f-d648-4dfd-afe4-bd731f88628e	It needs development so that the client can handle the operations effectively.	ktkota ktkota	##########	عميلنا العزيز، يؤسفنا سماع ذلك ونأمل منك التواصل معنا على الرقم 8001242225 أو من خلال البريد الإلكتروني info@riyadbank.com و تزويدنا بملاحظاتك لنتمكن من خدمتك بشكل أفضل.	2023-09-05 07:27:00	0	ar	us		1	ar	need development client handle operations effectively	Neutral	1	0	0
Google Play Store	211eb9d0-0302-4975-99b1-87698a0caa04	The application does not share transfers.	عزيز سعود	2023-09-02 08:35:00	عميلنا العزيز، نأمل منك التواصل معنا على الرقم 8001242225 أو من خلال البريد الإلكتروني info@riyadbank.com و تزويدنا بملاحظاتك لنتمكن من خدمتك بشكل أفضل.	2023-09-05 07:27:00	0	ar	us		2	ar	application share transfer	Neutral	0	1	0
Google Play Store	b182ed10-2669-4bd4-b08c-1dae95c8445b	The worst experience with a very bad application.	Osamo Ny	##########	عميلنا العزيز، يؤسفنا سماع ذلك ونأمل منك التواصل معنا على الرقم 8001242225 أو من خلال البريد الإلكتروني info@riyadbank.com و تزويدنا بملاحظاتك لنتمكن من خدمتك بشكل أفضل.	2023-09-05 07:25:00	0	ar	us		1	ar	bad experience bad application	Negative	1	0	0
Google Play Store	8a6437c9-c730-4c20-aead-cfee85452d40	Very bad, it is necessary to submit a government transaction receipt. I will upload it now, payment has been made and only the PDF receipt is available to download.	محمد عبد الحفيظ محمد	##########	عميلنا العزيز، نأمل منك التواصل معنا على الرقم 8001242225 أو من خلال البريد الإلكتروني info@riyadbank.com و تزويدنا بملاحظاتك لنتمكن من خدمتك بشكل أفضل.	2023-09-05 07:25:00	0	ar	us		1	ar	bad necessary submit government transaction receipt upload payment make pdf receipt available download	Negative	1	1	0
Google Play Store	c392889b-9302-47e0-9e7d-a5233b4b05b2	There is a recently emerged problem after the conversion and when requesting the transfer notification, the PDF file is not being downloaded.	محمد ابراهيم	##########	عميلنا العزيز، نأمل منك التواصل معنا على الرقم 8001242225 أو من خلال البريد الإلكتروني info@riyadbank.com و تزويدنا بملاحظاتك لنتمكن من خدمتك بشكل أفضل.	2023-09-05 07:24:00	1	ar	us		1	ar	recently emerge problem conversion request transfer notification pdf file download	Negative	0	1	0
Google Play Store	92f70044-2e3f-4314-b67e-1603b5d538a2	The application is excellent and all the features are also excellent, and I have no remarks.	محسن جعفري	##########			0	ar	us		5	ar	application excellent feature also excellent remark	Positive	0	0	0
Google Play Store	2f20cc44-8d05-4489-9612-64356d478a7e	One of the worst banks for me, my updated statements don't work properly.	محمد الوازعي	##########	عميلنا العزيز، يؤسفنا سماع ذلك ونأمل منك التواصل معنا على الرقم 8001242225 أو من خلال البريد الإلكتروني info@riyadbank.com و تزويدنا بملاحظاتك لنتمكن من خدمتك بشكل أفضل.	##########	0	ar	us		1	ar	one bad bank update statements dont work properly	Negative	1	1	0
Google Play Store	dd148f27-9279-4175-a61b-83623d943b98	"Many comments"	يحي عسيري	##########	عميلنا العزيز، يؤسفنا سماع ذلك ونأمل منك التواصل معنا على الرقم 8001242225 أو من خلال البريد الإلكتروني info@riyadbank.com و تزويدنا بملاحظاتك لنتمكن من خدمتك بشكل أفضل.	##########	0	ar	us		4	ar	many comment	Neutral	1	0	0
Google Play Store	7114c549-388b-4877-9f83-c30f05785fd0	The application does not convert quickly, there is a delay, especially in the morning. We hope to improve the quality.	Yuossef Ali	##########	عميلنا العزيز، يؤسفنا سماع ذلك ونأمل منك التواصل معنا على الرقم 8001242225 أو من خلال البريد الإلكتروني info@riyadbank.com و تزويدنا بملاحظاتك لنتمكن من خدمتك بشكل أفضل.	##########	0	ar	us		1	ar	application convert quickly delay especially morning hope improve quality	Negative	0	0	1
Google Play Store	17ebfe3e-7709-4ca7-91e4-9eeb9424a51e	Oh, Al Jazeera Bank's application is such a failed one, meaning the word itself, especially after the latest update. I will switch to Al Jazeera Bank, which is better.	كاسبر انوب	##########	عميلنا العزيز، يؤسفنا سماع ذلك ونأمل منك التواصل معنا على الرقم 8001242225 أو من خلال البريد الإلكتروني info@riyadbank.com و تزويدنا بملاحظاتك لنتمكن من خدمتك بشكل أفضل.	##########	0	ar	us		1	ar	oh al jazeera bank application fail one mean word especially late update switch al jazeera bank good	Negative	1	1	0
Google Play Store	991f4755-a87c-4aa5-abf1-c277ea543fef	The verification code is not reaching.	مركز السلطانه	##########	عميلنا العزيز، نأمل منك التواصل معنا على الرقم 8001242225 أو من خلال البريد الإلكتروني info@riyadbank.com و تزويدنا بملاحظاتك لنتمكن من خدمتك بشكل أفضل.	##########	0	ar	us		1	ar	verification code reach	Negative	0	1	0
Google Play Store	985a8090-2d95-4bcb-b79c-481d499981ae	Very bad, suddenly the application stopped working. Despite contacting customer service, the issue is still unresolved. Regards to Al-Rajhi Bank.	SAED TAHER	##########	عميلنا العزيز، يؤسفنا سماع ذلك ونأمل منك التواصل معنا على الرقم 8001242225 أو من خلال البريد الإلكتروني info@riyadbank.com و تزويدنا بملاحظاتك لنتمكن من خدمتك بشكل أفضل.	##########	1	ar	us		1	ar	bad suddenly application stop work despite contact customer service issue still unresolved regard alrajhi bank	Negative	1	1	0
Google Play Store	f0fe7004-9eee-4382-85c5-22db1d4dca71	Very good	يسرا الوشع	##########			0	ar	us		1	ar	good	Positive	0	0	0
Google Play Store	ab6818d6-5426-4b60-8446-096565cf3394	The application is bad and it has many flaws, and it has been like this for over a year. This is a shame on you, Bank Riyadh, and this is your application. Honestly, it doesn't even deserve a star, but I gave it one just so I could write the review... 👎🏻	3lσσŝн Montage	##########	عميلنا العزيز، يؤسفنا سماع ذلك ونأمل منك التواصل معنا على الرقم 8001242225 أو من خلال البريد الإلكتروني info@riyadbank.com و تزويدنا بملاحظاتك لنتمكن من خدمتك بشكل أفضل.	##########	0	ar	us		1	ar	application bad many flaw like year shame bank riyadh application honestly doesnt even deserve star give one could write review	Negative	1	0	0
Google Play Store	7c0c7dbf-a1e6-42cb-b16d-0752d95c517a	First, it was working well. Now, with every update, it doesn't work until now. It hasn't been working for a week, and I've deleted it and downloaded it again, but the situation is the same. I don't know what the problem is.	مصطفى عميره	##########	عميلنا العزيز، يؤسفنا سماع ذلك ونأمل منك التواصل معنا على الرقم 8001242225 أو من خلال البريد الإلكتروني info@riyadbank.com و تزويدنا بملاحظاتك لنتمكن من خدمتك بشكل أفضل.	##########	0	ar	us		1	ar	first work well every update doesnt work hasnt work week ive delete download situation dont know problem	Negative	0	1	0
Google Play Store	c048c9bb-59b9-46b8-8a2c-5e6b2e00c9b7	The application has become bad, I hope it will be better soon.	Halemah Alkalaf	##########	عميلنا العزيز، يؤسفنا سماع ذلك ونأمل منك التواصل معنا على الرقم 8001242225 أو من خلال البريد الإلكتروني info@riyadbank.com و تزويدنا بملاحظاتك لنتمكن من خدمتك بشكل أفضل.	##########	0	ar	us		1	ar	application become bad hope good soon	Negative	1	0	0
Google Play Store	05dc5f21-c7cf-4829-8216-67bcea84d758	Honestly, this application exhausts me. It's unreasonable that it rejects my login every time and asks me to reset the user, and I have to change the password for it to accept. Riyadh's application has become bad, and if it continues like this, I will have to switch to another bank.	NOOR moon	##########	عميلنا العزيز، يؤسفنا سماع ذلك ونأمل منك التواصل معنا على الرقم 8001242225 أو من خلال البريد الإلكتروني info@riyadbank.com و تزويدنا بملاحظاتك لنتمكن من خدمتك بشكل أفضل.	##########	0	ar	us		1	ar	honestly application exhaust unreasonable reject login every time ask reset user change password accept riyadhs application become bad continue like switch another bank	Negative	1	1	0
Google Play Store	1df3e33a-1570-4170-8693-3e83c10e121d	The application does not appear and does not load PDF files. After conversion, either it does not appear at all or it shows the wrong PDF document.	salam Nadry	##########	عميلنا العزيز، نأمل منك التواصل معنا على الرقم 8001242225 أو من خلال البريد الإلكتروني info@riyadbank.com و تزويدنا بملاحظاتك لنتمكن من خدمتك بشكل أفضل.	##########	0	ar	us		1	ar	application appear load pdf file conversion either appear show wrong pdf document	Negative	0	1	0
Google Play Store	4b7d11bf-6c5d-4071-9f85-03d3cf017db9	If you ask me about the reasons for the irritable bowel syndrome that I have, I would tell you that one of its causes is Banque Riyadh. Every time I solve one problem, a new problem arises. Now they have completed it and canceled the activation of my account. I am unable to transfer or do anything, and I don't know how to solve it.	ثامر الزهراني	##########	عميلنا العزيز، يؤسفنا سماع ذلك ونأمل منك التواصل معنا على الرقم 8001242225 أو من خلال البريد الإلكتروني info@riyadbank.com و تزويدنا بملاحظاتك لنتمكن من خدمتك بشكل أفضل.	##########	0	ar	us		1	ar	ask reason irritable bowel syndrome would tell one cause banque riyadh every time solve one problem new problem arise complete cancel activation account unable transfer anything dont know solve	Negative	0	1	0
Google Play Store	9a89a9fd-538c-4cd2-8ece-1710d716e9bc	One of the most successful experiences in the application of banking applications.	علي	##########	عميلنا العزيز، يؤسفنا سماع ذلك ونأمل منك التواصل معنا على الرقم 8001242225 أو من خلال البريد الإلكتروني info@riyadbank.com و تزويدنا بملاحظاتك لنتمكن من خدمتك بشكل أفضل.	##########	0	ar	us		1	ar	one successful experience application bank applications	Positive	1	0	0
Google Play Store	ad4ba6fc-78ab-45ef-96cc-48d9f0950d8e	Very very bad application	مشاعل عبدالمنعم	##########	عميلنا العزيز، يؤسفنا سماع ذلك ونأمل منك التواصل معنا على الرقم 8001242225 أو من خلال البريد الإلكتروني info@riyadbank.com و تزويدنا بملاحظاتك لنتمكن من خدمتك بشكل أفضل.	##########	0	ar	us		1	ar	bad application	Negative	1	0	0
Google Play Store	d49d8ce5-c2f2-40ad-8865-ebbfeed05d17	I love you.	Ahmed	##########			0	ar	us		1	ar	love	Positive	0	0	0
Google Play Store	7c8bce6c-b1b9-4138-88c3-3d97a373f39f	Very nice, but I wish for some updates.	Belal Algoby	##########	عميلنا العزيز، نأمل منك التواصل معنا على الرقم 8001242225 أو من خلال البريد الإلكتروني info@riyadbank.com و تزويدنا بملاحظاتك لنتمكن من خدمتك بشكل أفضل.	##########	0	ar	us		5	ar	nice wish update	Positive	0	0	0
Google Play Store	befe2987-6c03-44fb-93a1-1b074958dcdf	I have changed the password more than once and it is not working for me. Before, it used to take a long time to open, but eventually it would open. But now, it is completely refusing to open.	صلاح السنيدي	##########	عميلنا العزيز، يؤسفنا سماع ذلك ونأمل منك التواصل معنا على الرقم 8001242225 أو من خلال البريد الإلكتروني info@riyadbank.com و تزويدنا بملاحظاتك لنتمكن من خدمتك بشكل أفضل.	##########	1	ar	us		1	ar	change password work use take long time open eventually would open completely refuse open	Negative	0	1	1
Google Play Store	e98e89bb-6bed-4501-81d5-290a005e963a	After the new update, it doesn't work at all with Android devices.	جميل اليماني	##########	عميلنا العزيز، نأمل منك التواصل معنا على الرقم 8001242225 أو من خلال البريد الإلكتروني info@riyadbank.com و تزويدنا بملاحظاتك لنتمكن من خدمتك بشكل أفضل.	##########	0	ar	us		1	ar	new update doesnt work android devices	Negative	0	1	0
Google Play Store	0cde4254-ed70-4b5e-a89e-cbffcc96ce52	Kam Mukhis application	تعبان ولهان	##########			0	ar	us		1	ar	kam mukhis application	Neutral	1	0	0
Google Play Store	779a1fb3-fb50-48ec-9f76-ba779870d53d	The application is not working.	Mr.majed	##########	عميلنا العزيز، يؤسفنا سماع ذلك ونأمل منك التواصل معنا على الرقم 8001242225 أو من خلال البريد الإلكتروني info@riyadbank.com و تزويدنا بملاحظاتك لنتمكن من خدمتك بشكل أفضل.	##########	0	ar	us		1	ar	application work	Negative	0	1	0
Google Play Store	9d7b0648-80a3-4b08-a156-ad2349a41219	After the update, it is not possible to print the receipt 😤 It shows the problem "feature is not supported".	A . R	##########	عميلنا العزيز، يؤسفنا سماع ذلك ونأمل منك التواصل معنا على الرقم 8001242225 أو من خلال البريد الإلكتروني info@riyadbank.com و تزويدنا بملاحظاتك لنتمكن من خدمتك بشكل أفضل.	##########	0	ar	us		5	ar	update possible print receipt show problem feature support	Negative	0	1	0
Google Play Store	615e5824-0144-4fcb-922a-69362f2c1d5d	"Failure, but Al-Riyadh Bank hangs on."	fahad alanazi	##########	عميلنا العزيز، يؤسفنا سماع ذلك ونأمل منك التواصل معنا على الرقم 8001242225 أو من خلال البريد الإلكتروني info@riyadbank.com و تزويدنا بملاحظاتك لنتمكن من خدمتك بشكل أفضل.	##########	0	ar	us		1	ar	failure alriyadh bank hang	Negative	0	1	1
Google Play Store	e234b7c0-4138-4106-abb0-b2e8e3413ffa	Does not accept saving operations as pdf like it used to before.	علي الخليفة	##########	عميلنا العزيز، يؤسفنا سماع ذلك ونأمل منك التواصل معنا على الرقم 8001242225 أو من خلال البريد الإلكتروني info@riyadbank.com و تزويدنا بملاحظاتك لنتمكن من خدمتك بشكل أفضل.	##########	0	ar	us		1	ar	accept save operations pdf like use	Negative	0	1	0
Google Play Store	9e276740-8ecc-45da-b6c0-f807a472ad09	The application is very, very, very bad. I always enter my information correctly and it tells me it's an error.	الياس الليلي	##########	عميلنا العزيز، يؤسفنا سماع ذلك ونأمل منك التواصل معنا على الرقم 8001242225 أو من خلال البريد الإلكتروني info@riyadbank.com و تزويدنا بملاحظاتك لنتمكن من خدمتك بشكل أفضل.	##########	0	ar	us		1	ar	application bad always enter information correctly tell error	Negative	1	1	0
Google Play Store	89ed0ab0-39c2-4afc-9ec0-29c2581ad4aa	Every time I try to open an account, it goes to Bukwi...	Mohammad Abdallah	##########	عميلنا العزيز، نأمل منك التواصل معنا على الرقم 8001242225 أو من خلال البريد الإلكتروني info@riyadbank.com و تزويدنا بملاحظاتك لنتمكن من خدمتك بشكل أفضل.	##########	0	ar	us		1	ar	every time try open account go bukwi	Negative	0	1	0
Google Play Store	b87dae26-d8aa-4ba2-9f9a-c3d54c28ae94	Excellent water, Prince Badr bin Abdulmohsen	Jdjdjd Jrhrhdurujdjdh	##########			0	ar	us		5	ar	excellent water prince badr bin abdulmohsen	Positive	0	0	0
Google Play Store	d59f6f3d-0883-4d1c-96ca-7598d5934ea6	Unfortunately, the services are very poor when it comes to paying bills or making transfers. You cannot print a receipt, and instead, a menu in English appears stating that the feature is not supported. It seems that the account will be closed, and we will have to deal with other banks.	شوق علي	##########	عميلنا العزيز، يؤسفنا سماع ذلك ونأمل منك التواصل معنا على الرقم 8001242225 أو من خلال البريد الإلكتروني info@riyadbank.com و تزويدنا بملاحظاتك لنتمكن من خدمتك بشكل أفضل.	##########	47	ar	us		1	ar	unfortunately service poor come pay bill make transfer print receipt instead menu english appear state feature support seem account close deal bank	Negative	1	1	0
Google Play Store	20c4b22e-66fd-4951-820a-216219faf1dc	Excellent.	طيف	##########			0	ar	us		5	ar	excellent	Positive	0	0	0
Google Play Store	0c267fcb-9d7e-4522-8b8f-1b3ddda223f9	The application has become very bad after the latest update. It is not working properly anymore. When I try to set a new password, it rejects it and says it is incorrect. Please solve this problem.	عابر الصمت	##########	عميلنا العزيز، يؤسفنا سماع ذلك ونأمل منك التواصل معنا على الرقم 8001242225 أو من خلال البريد الإلكتروني info@riyadbank.com و تزويدنا بملاحظاتك لنتمكن من خدمتك بشكل أفضل.	##########	0	ar	us		1	ar	application become bad late update work properly anymore try set new password reject say incorrect please solve problem	Negative	1	1	0
Google Play Store	8b064ca1-d536-4075-ada5-4babfc0b20e6	The latest update, why isn't it updating?	سعد الغامدي	##########	عميلنا العزيز، يؤسفنا سماع ذلك ونأمل منك التواصل معنا على الرقم 8001242225 أو من خلال البريد الإلكتروني info@riyadbank.com و تزويدنا بملاحظاتك لنتمكن من خدمتك بشكل أفضل.	##########	0	ar	us		5	ar	late update isnt update	Neutral	0	1	0
Google Play Store	787a3bad-68ce-42d3-90f1-9274c48ffdcf	Whenever I try to open an online account and enter my ID number, I am presented with a barcode for a Google Play wallet. I want to open a current account, not a wallet. Is there a solution to this problem?	Mumd Awadh	##########	عميلنا العزيز، نأمل منك التواصل معنا على الرقم 8001242225 أو من خلال البريد الإلكتروني info@riyadbank.com و تزويدنا بملاحظاتك لنتمكن من خدمتك بشكل أفضل.	##########	0	ar	us		1	ar	whenever try open online account enter id number present barcode google play wallet want open current account wallet solution problem	Negative	0	1	0
Google Play Store	58fc6200-2422-4bf4-a0c6-fb04da5bbd94	The application is not working and I am unable to access it.	lojamy Syrian	##########	عميلنا العزيز، يؤسفنا سماع ذلك ونأمل منك التواصل معنا على الرقم 8001242225 أو من خلال البريد الإلكتروني info@riyadbank.com و تزويدنا بملاحظاتك لنتمكن من خدمتك بشكل أفضل.	##########	0	ar	us		2	ar	application work unable access	Negative	0	1	0
Google Play Store	f9c43743-27cf-4cdb-9200-51f094c448d4	Unfortunately, a very bad experience with banks developing an application that you cannot add a beneficiary to and is very complicated.	mansour Alkalifah	##########	عميلنا العزيز، يؤسفنا سماع ذلك ونأمل منك التواصل معنا على الرقم 8001242225 أو من خلال البريد الإلكتروني info@riyadbank.com و تزويدنا بملاحظاتك لنتمكن من خدمتك بشكل أفضل.	##########	1	ar	us		1	ar	unfortunately bad experience bank develop application add beneficiary complicate	Negative	1	0	0
Google Play Store	caaa1823-a0d5-4a24-8d64-06fdd59609b5	The application is not user-friendly, and the registration process is complicated. There is only one Arabic word =العربيه= without any other Arabic content.	ابو عامر	##########	عميلنا العزيز، يؤسفنا سماع ذلك ونأمل منك التواصل معنا على الرقم 8001242225 أو من خلال البريد الإلكتروني info@riyadbank.com و تزويدنا بملاحظاتك لنتمكن من خدمتك بشكل أفضل.	##########	0	ar	us		1	ar	application userfriendly registration process complicate one arabic word without arabic content	Negative	1	0	0
Google Play Store	5a080c18-0679-49cc-bf2a-861b77e55378	Very very very bad.	دائرة العلوم	##########	عميلنا العزيز، يؤسفنا سماع ذلك ونأمل منك التواصل معنا على الرقم 8001242225 أو من خلال البريد الإلكتروني info@riyadbank.com و تزويدنا بملاحظاتك لنتمكن من خدمتك بشكل أفضل.	##########	0	ar	us		1	ar	bad	Negative	1	0	0
Google Play Store	6acb92cc-74b8-4c39-99b7-d8aaedcddf85	The application is very, very bad after the update and it is impossible to deal with it multiple times. It rejects the password even though it is definitely correct, and it does not send the code. We have changed the password several times and it did not accept it. It is the worst experience, I cannot access my account.	العلم الشاهق	##########	عميلنا العزيز، يؤسفنا سماع ذلك ونأمل منك التواصل معنا على الرقم 8001242225 أو من خلال البريد الإلكتروني info@riyadbank.com و تزويدنا بملاحظاتك لنتمكن من خدمتك بشكل أفضل.	##########	0	ar	us		1	ar	application bad update impossible deal multiple time reject password even though definitely correct send code change password several time accept bad experience access account	Negative	1	1	0
Google Play Store	a5ef4b71-cde9-4ca7-9d90-23ccade6946f	The application does not work on Android devices like Huawei.	Ali Hassan	##########	عميلنا العزيز، يؤسفنا سماع ذلك ونأمل منك التواصل معنا على الرقم 8001242225 أو من خلال البريد الإلكتروني info@riyadbank.com و تزويدنا بملاحظاتك لنتمكن من خدمتك بشكل أفضل.	##########	0	ar	us		1	ar	application work android devices like huawei	Negative	0	1	0
Google Play Store	1df02d54-2b06-4998-adb8-d7484c4b373a	The application is not working. Please solve the problem 11/8/2023.	Ziyad Matooq	##########	عميلنا العزيز، يؤسفنا سماع ذلك ونأمل منك التواصل معنا على الرقم 8001242225 أو من خلال البريد الإلكتروني info@riyadbank.com و تزويدنا بملاحظاتك لنتمكن من خدمتك بشكل أفضل.	##########	0	ar	us		1	ar	application work please solve problem	Negative	0	1	0
Google Play Store	efa71390-e1f9-413d-84ad-a0dd3e4b0f97	When transferring an amount to an account, I am unable to save the invoice receipt as a PDF file due to an issue (feature is not supported).	smsm	##########	عميلنا العزيز، يؤسفنا سماع ذلك ونأمل منك التواصل معنا على الرقم 8001242225 أو من خلال البريد الإلكتروني info@riyadbank.com و تزويدنا بملاحظاتك لنتمكن من خدمتك بشكل أفضل.	##########	2	ar	us		4	ar	transfer amount account unable save invoice receipt pdf file due issue feature support	Negative	0	1	0
Google Play Store	5752fe8c-e915-46db-8e19-a898ee41f122	The update is terrible, I can't transfer anything or add a beneficiary, and I can't even exit after logging out.	Fathi Aljishi	##########			0	ar	us		1	ar	update terrible cant transfer anything add beneficiary cant even exit log	Negative	1	1	0
Google Play Store	c966ab66-8b81-488b-85f2-e826a97d7530	Hello. The latest version is not working properly as I cannot print the IBAN certification and cannot print an account statement. My device is Android.	y مخاوي الليل	##########	عميلنا العزيز، يؤسفنا سماع ذلك ونأمل منك التواصل معنا على الرقم 8001242225 أو من خلال البريد الإلكتروني info@riyadbank.com و تزويدنا بملاحظاتك لنتمكن من خدمتك بشكل أفضل.	##########	3	ar	us		1	ar	hello late version work properly print iban certification print account statement device android	Negative	0	1	0
Google Play Store	d964d22a-b860-481a-b59a-10fba269bd63	The worst program ever, I don't expect to see another program of this bad quality.	محمد آل درويش	##########	عميلنا العزيز، يؤسفنا سماع ذلك ونأمل منك التواصل معنا على الرقم 8001242225 أو من خلال البريد الإلكتروني info@riyadbank.com و تزويدنا بملاحظاتك لنتمكن من خدمتك بشكل أفضل.	##########	0	ar	us		1	ar	bad program ever dont expect see another program bad quality	Negative	1	0	0
Google Play Store	234db38c-9b53-4843-b3f7-fd6ff747a212	With the update, the username is not being saved; it gets deleted every now and then.	روزا سلامه	2023-08-09 05:16:00	عميلنا العزيز، نأمل منك التواصل معنا على الرقم 8001242225 أو من خلال البريد الإلكتروني info@riyadbank.com و تزويدنا بملاحظاتك لنتمكن من خدمتك بشكل أفضل.	##########	0	ar	us		1	ar	update username save get delete every	Negative	0	1	0
Google Play Store	d8f5e050-a68c-4d50-98e0-826b15e3243a	The application "Zay El bad" keeps telling you the wrong password every once in a while, and it is "صخ" (which means "rock" in English).	Khalid B	##########			0	ar	us		1	ar	application zay el bad keep tell wrong password every mean rock english	Negative	1	0	0
Google Play Store	260a1cfe-0ad2-4879-b26b-2a74a34ce9a0	When entering the password and clicking on the login button, it takes you to the site dashboard and enters you into the map settings since the site is open and the site is correct. How can this be resolved or how can we cancel the account and go to another bank?	bin aqel	##########	عميلنا العزيز، نأمل منك التواصل معنا على الرقم 8001242225 أو من خلال البريد الإلكتروني info@riyadbank.com و تزويدنا بملاحظاتك لنتمكن من خدمتك بشكل أفضل.	##########	0	ar	us		2	ar	enter password click login button take site dashboard enter map settings since site open site correct resolve cancel account go another bank	Neutral	0	1	0
Google Play Store	0f5bee44-5da2-46b5-bb5d-3cc885232272	sfw	ft	2023-08-08 06:19:00			0	ar	us		5	ar	sfw	Neutral	0	0	0
Google Play Store	105993ce-aad6-4730-b244-ebabecbbda73	Riyadh Bank is unable to design or develop an application.	أبو صبا	##########	عميلنا العزيز، نأمل منك التواصل معنا على الرقم 8001242225 أو من خلال البريد الإلكتروني info@riyadbank.com و تزويدنا بملاحظاتك لنتمكن من خدمتك بشكل أفضل.	##########	0	ar	us		1	ar	riyadh bank unable design develop application	Negative	1	1	0
Google Play Store	04a7b884-d1ea-4eaf-b541-423edf371c0c	It is not working, please fix the problem.	محمد M. S	2023-08-07 06:31:00	عميلنا العزيز، يؤسفنا سماع ذلك ونأمل منك التواصل معنا على الرقم 8001242225 أو من خلال البريد الإلكتروني info@riyadbank.com و تزويدنا بملاحظاتك لنتمكن من خدمتك بشكل أفضل.	2023-08-07 09:16:00	0	ar	us		1	ar	work please fix problem	Negative	0	1	0
Google Play Store	a0fd6644-768f-40d8-b7bf-a43704fb9fa4	Very slow.	idol gaming	2023-08-07 05:55:00	Dear customer, kindly provide us with your experience for better assistance, and please contact us at 8001242225 or info@riyadbank.com and we will be happy to serve you	##########	0	ar	us		1	ar	slow	Negative	0	0	1
Google Play Store	ed836aa5-d2bd-44f5-8880-4ba8a94b46a8	Peace be upon you, I have a problem and I went to the bank to solve it, but they did not help me. I have been dealing with Al-Riyadh Bank card properly and withdrawing, but when I tried to use it online, it was declined. I hope someone can tell me the solution. I recommend Al-Riyadh Bank. I have been in this situation for a year now.	Dy ahmd	2023-08-07 01:13:00	عميلنا العزيز، نأمل منك التواصل معنا على الرقم 8001242225 أو من خلال البريد الإلكتروني info@riyadbank.com و تزويدنا بملاحظاتك لنتمكن من خدمتك بشكل أفضل.	2023-08-07 09:12:00	0	ar	us		1	ar	peace upon problem go bank solve help deal alriyadh bank card properly withdraw try use online decline hope someone tell solution recommend alriyadh bank situation year	Negative	0	1	0
Google Play Store	53f57e7d-4346-4790-be98-b02bb48c3376	The program is not working anymore. It says the password is incorrect.	أبو العربي السريع	2023-08-06 03:03:00	عميلنا العزيز، يؤسفنا سماع ذلك ونأمل منك التواصل معنا على الرقم 8001242225 أو من خلال البريد الإلكتروني info@riyadbank.com و تزويدنا بملاحظاتك لنتمكن من خدمتك بشكل أفضل.	##########	0	ar	us		1	ar	program work anymore say password incorrect	Negative	0	1	0
Google Play Store	73a7844a-1674-443e-aa40-d72ae2cb7d2c	The application is frozen/hanging.	h g	##########	عميلنا العزيز، يؤسفنا سماع ذلك ونأمل منك التواصل معنا على الرقم 8001242225 أو من خلال البريد الإلكتروني info@riyadbank.com و تزويدنا بملاحظاتك لنتمكن من خدمتك بشكل أفضل.	##########	0	ar	us		1	ar	application frozenhanging	Negative	1	0	1
Google Play Store	44076cd3-8013-4dba-9f4d-c3fed8995b10	The application is bad in usage and the program keeps crashing. It has been a month now and I cannot use it.	Salha188 Alfattah	##########	عميلنا العزيز، يؤسفنا سماع ذلك ونأمل منك التواصل معنا على الرقم 8001242225 أو من خلال البريد الإلكتروني info@riyadbank.com و تزويدنا بملاحظاتك لنتمكن من خدمتك بشكل أفضل.	##########	0	ar	us		1	ar	application bad usage program keep crash month use	Negative	1	1	1
Google Play Store	5d72aa41-b2fe-4041-9cfc-d94b0c161011	After the update, it became bad. It does not accept card charging and does not display a PDF file after conversion.	مدثر محمد	##########	عميلنا العزيز، يؤسفنا سماع ذلك ونأمل منك التواصل معنا على الرقم 8001242225 أو من خلال البريد الإلكتروني info@riyadbank.com و تزويدنا بملاحظاتك لنتمكن من خدمتك بشكل أفضل.	##########	2	ar	us		1	ar	update become bad accept card charge display pdf file conversion	Negative	1	1	0
Google Play Store	eb0c61b6-5760-4ae4-8e62-4089adafc5b1	The application is not working.	Abu Ryan	##########	عميلنا العزيز، يؤسفنا سماع ذلك ونأمل منك التواصل معنا على الرقم 8001242225 أو من خلال البريد الإلكتروني info@riyadbank.com و تزويدنا بملاحظاتك لنتمكن من خدمتك بشكل أفضل.	##########	0	ar	us		1	ar	application work	Negative	0	1	0
Google Play Store	51783169-a447-42c9-9eb6-c43e9d85cac7	Towkin	Mohammed khliwi	2023-08-02 03:24:00			0	ar	us		5	ar	towkin	Neutral	0	0	0
Google Play Store	bb2b93c0-c801-4497-a8cf-b1ea2d68bdae	Can I update my ID information from the program?	Rd Tr	##########	عميلنا العزيز، نأمل منك التواصل معنا على الرقم 8001242225 أو من خلال البريد الإلكتروني info@riyadbank.com و تزويدنا بملاحظاتك لنتمكن من خدمتك بشكل أفضل.	##########	0	ar	us		5	ar	update id information program	Neutral	0	1	0
Google Play Store	70c55b89-be1b-4115-ae79-73f729c9b8bb	I cannot transfer money to my friend's account, it's very far away.	زايد عسيري	##########	عميلنا العزيز، نأمل منك التواصل معنا على الرقم 8001242225 أو من خلال البريد الإلكتروني info@riyadbank.com و تزويدنا بملاحظاتك لنتمكن من خدمتك بشكل أفضل.	##########	0	ar	us		2	ar	transfer money friends account far away	Negative	0	1	0
Google Play Store	78953101-c574-43ed-bcaf-1787711ec90b	The device is connected to the network and the network is strong. However, it refuses to download due to the network. Most of the applications are already downloaded and I have not faced the same issue before.	ABDULRAHMAN ALZAHRANI	##########	عميلنا العزيز، يؤسفنا سماع ذلك ونأمل منك التواصل معنا على الرقم 8001242225 أو من خلال البريد الإلكتروني info@riyadbank.com و تزويدنا بملاحظاتك لنتمكن من خدمتك بشكل أفضل.	##########	0	ar	us		1	ar	device connect network network strong however refuse download due network applications already download face issue	Neutral	0	1	0
Google Play Store	6539de35-03f1-4cd5-9350-ed110227492f	Bad commenting problems never end.	`L e v i	##########	عميلنا العزيز، يؤسفنا سماع ذلك ونأمل منك التواصل معنا على الرقم 8001242225 أو من خلال البريد الإلكتروني info@riyadbank.com و تزويدنا بملاحظاتك لنتمكن من خدمتك بشكل أفضل.	##########	0	ar	us		1	ar	bad comment problems never end	Negative	1	1	0
Google Play Store	0b53676c-abf1-499d-b809-df88cc714036	I called the Riyadh phone again and the problem was resolved. Thank you for your notifications.	لانا فتحي	##########	عميلنا العزيز، يؤسفنا سماع ذلك ونأمل منك التواصل معنا على الرقم 8001242225 أو من خلال البريد الإلكتروني info@riyadbank.com و تزويدنا بملاحظاتك لنتمكن من خدمتك بشكل أفضل.	##########	0	ar	us		5	ar	call riyadh phone problem resolve thank notifications	Positive	0	1	0
Google Play Store	dbe47a0c-7f9b-4bc2-b667-17452510bff5	The program crashes after the number.	2023-01-02 00:00:00	##########	عميلنا العزيز، يؤسفنا سماع ذلك ونأمل منك التواصل معنا على الرقم 8001242225 أو من خلال البريد الإلكتروني info@riyadbank.com و تزويدنا بملاحظاتك لنتمكن من خدمتك بشكل أفضل.	##########	0	ar	us		1	ar	program crash number	Negative	0	1	0
Google Play Store	9f7eb830-f6fe-4b61-bf48-898ca765c1ac	"You are a symbol of greatness in the heights of the mountains, which is why this platform has been chosen to highlight your exceptional nature. Abu Rakan"	عبدالله العامري	##########			0	ar	us		5	ar	symbol greatness heights mountains platform choose highlight exceptional nature abu rakan	Positive	1	0	0
Google Play Store	bee600be-b120-4919-b53d-bd6e866c46d3	The application was excellent, but now it is very bad. I hope the problems get resolved.	محمد عبدالعزيز	##########	عميلنا العزيز، يؤسفنا سماع ذلك ونأمل منك التواصل معنا على الرقم 8001242225 أو من خلال البريد الإلكتروني info@riyadbank.com و تزويدنا بملاحظاتك لنتمكن من خدمتك بشكل أفضل.	##########	0	ar	us		2	ar	application excellent bad hope problems get resolve	Negative	1	0	0
Google Play Store	9487107e-552f-4d46-b660-b4a74d52e063	Good luck.	galal nahas	##########			0	ar	us		4	ar	good luck	Positive	0	0	0
Google Play Store	363b9461-f63a-4468-ad1c-4ce6cc2b800b	Excellent	سارا محمد	##########			0	ar	us		5	ar	excellent	Positive	0	0	0
Google Play Store	8f2ac6f0-c589-4815-bb18-29587d3e40a9	Garbage application	أيمن الفضلي	##########			0	ar	us		1	ar	garbage application	Negative	1	1	1
Google Play Store	90d17a04-7885-4c91-bb65-b915ae3fcb5a	The application has become very bad since a month ago. It does not show card transactions, nor does it print transfer receipts, and sometimes it deletes IBAN certificates without any benefit, even after reinstalling it several times.	Ghaith Al Sadiq	##########	عميلنا العزيز، يؤسفنا سماع ذلك ونأمل منك التواصل معنا على الرقم 8001242225 أو من خلال البريد الإلكتروني info@riyadbank.com و تزويدنا بملاحظاتك لنتمكن من خدمتك بشكل أفضل.	##########	2	ar	us		2	ar	application become bad since month ago show card transactions print transfer receipt sometimes delete iban certificate without benefit even reinstall several time	Negative	1	1	0
Google Play Store	0947dd1f-1d48-4806-9ad8-e7f95ba75eb1	Not valid, does not work properly.	ماجد العودي	##########	عميلنا العزيز، يؤسفنا سماع ذلك ونأمل منك التواصل معنا على الرقم 8001242225 أو من خلال البريد الإلكتروني info@riyadbank.com و تزويدنا بملاحظاتك لنتمكن من خدمتك بشكل أفضل.	##########	0	ar	us		1	ar	valid work properly	Negative	0	1	0
Google Play Store	d4997c90-3474-4153-bfd9-2a98f06e5312	The app is very slow. Please restart the app for better performance.	salem saad	##########	عميلنا العزيز، يؤسفنا سماع ذلك ونأمل منك التواصل معنا على الرقم 8001242225 أو من خلال البريد الإلكتروني info@riyadbank.com و تزويدنا بملاحظاتك لنتمكن من خدمتك بشكل أفضل.	##########	0	ar	us		1	ar	app slow please restart app good performance	Negative	0	0	1
Google Play Store	dd9a99a5-6a57-4217-b5fb-802aedb91aac	I can't create a PDF file for any of the operations in my account. My mobile phone runs on the Android operating system, but when I use the application on an iPhone, it works. Please advise. Note that I sent an email with this issue along with a screenshot of the error, but no action has been taken by your side.	Ezz Maleek	##########	عميلنا العزيز، نأمل منك التواصل معنا على الرقم 8001242225 أو من خلال البريد الإلكتروني info@riyadbank.com و تزويدنا بملاحظاتك لنتمكن من خدمتك بشكل أفضل.	##########	47	ar	us		2	ar	cant create pdf file operations account mobile phone run android operate system use application iphone work please advise note send email issue along screenshot error action take side	Negative	0	1	0
Google Play Store	5b9d83d1-c904-45d6-8589-cf18e6903ec5	It was excellent, but now take me home. It doesn't accept the correct password. The bank is not working well.	روائع الباديه	##########	عميلنا العزيز، يؤسفنا سماع ذلك ونأمل منك التواصل معنا على الرقم 8001242225 أو من خلال البريد الإلكتروني info@riyadbank.com و تزويدنا بملاحظاتك لنتمكن من خدمتك بشكل أفضل.	##########	0	ar	us		5	ar	excellent take home doesnt accept correct password bank work well	Negative	1	1	0
Google Play Store	27049dc9-59e2-485d-bde1-342411ace7f4	I register and complete all the procedures, and the verification code is sent to me. But the problem is that it returns me to a data screen, and when I enter my username and password, it says it is incorrect, even though I have changed it and it has been approved.	عبدالعزيز باعباد	##########	عميلنا العزيز، نأمل منك التواصل معنا على الرقم 8001242225 أو من خلال البريد الإلكتروني info@riyadbank.com و تزويدنا بملاحظاتك لنتمكن من خدمتك بشكل أفضل.	##########	0	ar	us		1	ar	register complete procedures verification code send problem return data screen enter username password say incorrect even though change approve	Neutral	0	1	0
Google Play Store	640ff3d8-b2c1-4c70-b64f-a4903b14401f	He gives me an incorrect password and I don't know the reason, despite the fact that the password is correct 100/100.	طه الغرب	##########	عميلنا العزيز، نأمل منك التواصل معنا على الرقم 8001242225 أو من خلال البريد الإلكتروني info@riyadbank.com و تزويدنا بملاحظاتك لنتمكن من خدمتك بشكل أفضل.	##########	3	ar	us		1	ar	give incorrect password dont know reason despite fact password correct	Negative	0	1	0
Google Play Store	b8572bca-aa83-42ab-b529-04dc7620321a	The application has not been working for three days, what could be the reason? There are no updates available, I have deleted the application and reinstalled it but it is still not working. What is the solution? Application error.	MHK Games	##########	عميلنا العزيز، نأمل منك التواصل معنا على الرقم 8001242225 أو من خلال البريد الإلكتروني info@riyadbank.com و تزويدنا بملاحظاتك لنتمكن من خدمتك بشكل أفضل.	##########	1	ar	us		1	ar	application work three days could reason update available delete application reinstall still work solution application error	Negative	0	1	0
Google Play Store	f7358f18-38de-4991-8e7d-dffd91b3127e	It is very long, the username. Write the username and password correctly, but it is written incorrectly.	matar algarni	##########	عميلنا العزيز، يؤسفنا سماع ذلك ونأمل منك مشاركتنا ملاحظتك من خلال التواصل على الرقم 8001242225 أو عبر البريد الالكتروني info@riyadbank.com و سيتم النظر في الملاحظة بعين الاعتبار	##########	0	ar	us		1	ar	long username write username password correctly write incorrectly	Negative	0	1	0
Google Play Store	80d760bf-65ca-4247-8ea4-1939ced25c2b	Very bad application	سعود المرواني	##########	عميلنا العزيز، يؤسفنا سماع ذلك ونأمل منك التواصل معنا على الرقم 8001242225 أو من خلال البريد الإلكتروني info@riyadbank.com و تزويدنا بملاحظاتك لنتمكن من خدمتك بشكل أفضل.	##########	1	ar	us		1	ar	bad application	Negative	1	0	0
Google Play Store	7bf144c1-2f2c-4c28-be37-6f417ccfc63f	Slowly, to some extent.	ابو خااالد الحنتول	##########	عميلنا العزيز، نأمل منك التواصل معنا على الرقم 8001242225 أو من خلال البريد الإلكتروني info@riyadbank.com و تزويدنا بملاحظاتك لنتمكن من خدمتك بشكل أفضل.	##########	0	ar	us		2	ar	slowly extent	Neutral	0	0	1
Google Play Store	e717fe8b-ded1-4c71-a5bc-a565821795ae	The password reset process was extremely difficult.	mohmmed alshmrani	##########	عميلنا العزيز، يؤسفنا سماع ذلك ونأمل منك التواصل معنا على الرقم 8001242225 أو من خلال البريد الإلكتروني info@riyadbank.com و تزويدنا بملاحظاتك لنتمكن من خدمتك بشكل أفضل.	##########	0	ar	us		1	ar	password reset process extremely difficult	Negative	1	1	0
Google Play Store	d6c3fa23-e885-4451-9be3-83528dc96498	This is the worst application I have ever used. It is not worth it and it always freezes or says "you don't have an account." We hope for development and improvement in quality.	Laila Aqeel	##########	عميلنا العزيز، يؤسفنا سماع ذلك ونأمل منك التواصل معنا على الرقم 8001242225 أو من خلال البريد الإلكتروني info@riyadbank.com و تزويدنا بملاحظاتك لنتمكن من خدمتك بشكل أفضل.	##########	0	ar	us		1	ar	bad application ever use worth always freeze say dont account hope development improvement quality	Negative	1	0	1
Google Play Store	269b5041-2d8e-4f4f-b7d4-e480a361660d	Excellent	Dgje Hci	##########			0	ar	us		5	ar	excellent	Positive	0	0	0
Google Play Store	b4aa2174-8217-4d26-9694-4d6b0db05d13	The modern application is unfortunately extremely bad and very unresponsive.	ابو احمد	##########	عميلنا العزيز، يؤسفنا سماع ذلك ونأمل منك التواصل معنا على الرقم 8001242225 أو من خلال البريد الإلكتروني info@riyadbank.com و تزويدنا بملاحظاتك لنتمكن من خدمتك بشكل أفضل.	##########	0	ar	us		1	ar	modern application unfortunately extremely bad unresponsive	Negative	1	0	1
Google Play Store	14a69617-7f83-43e8-aea8-11a65f6d52f5	I loved it a lot 💙	HASOON. 68	##########			0	ar	us		5	ar	love lot	Positive	0	0	0
Google Play Store	502e2f19-78b8-42c5-a457-f922ff44880a	Unfortunately, and with all sincerity, this application is complex and unsuccessful. I'm trying to log into my account, and it keeps saying that my password or username is incorrect, even though I am sure of both. I am required to reset it, but when I try, it rejects it, using the excuse of the username or account number being incorrect. Also, why is there so much failure on your part, Bank Al Ri…	جمال فرحات	##########	عميلنا العزيز، يؤسفنا سماع ذلك ونأمل منك مشاركتنا ملاحظتك من خلال التواصل على الرقم 8001242225 أو عبر البريد الالكتروني info@riyadbank.com و سيتم النظر في الملاحظة بعين الاعتبار	##########	0	ar	us		1	ar	unfortunately sincerity application complex unsuccessful im try log account keep say password username incorrect even though sure require reset try reject use excuse username account number incorrect also much failure part bank al riyadh look bank make things easy promise close account switch another bank issue resolve advise others deal bank al riyadh	Negative	1	1	0
Google Play Store	2e4a7cb0-7a33-453b-8a77-84a6a35bd2ad	It does not need to be evaluated.	عبدالله الزهراني	##########			0	ar	us		5	ar	need evaluate	Neutral	1	0	0
Google Play Store	f0acd512-72bf-4e69-93fc-adee341d98d9	Unfortunately, I work for the oldest and most prestigious bank, but people are moving ahead while its electronic services are declining. The application has countless issues that have not been sorted out for two days. Sometimes it works, and sometimes it doesn't. It's a shame for such a giant bank to have these kinds of problems.	نــاجــي الحارثي	##########	عميلنا العزيز، يؤسفنا سماع ذلك ونأمل منك مشاركتنا ملاحظتك من خلال التواصل على الرقم 8001242225 أو عبر البريد الالكتروني info@riyadbank.com و سيتم النظر في الملاحظة بعين الاعتبار	##########	0	ar	us		1	ar	unfortunately work old prestigious bank people move ahead electronic service decline application countless issue sort two days sometimes work sometimes doesnt shame giant bank kinds problems	Negative	1	1	0
Google Play Store	9040c02c-1c19-4495-bbe1-96b35c03590a	The application disappears from the device whenever an update is installed, and I have to reinstall it from the store.	سبحان الله وبحمده سبحان الله العظيم	##########	عميلنا العزيز، نأمل منك التواصل معنا على الرقم 8001242225 أو من خلال البريد الإلكتروني info@riyadbank.com و تزويدنا بملاحظاتك لنتمكن من خدمتك بشكل أفضل.	##########	0	ar	us		1	ar	application disappear device whenever update instal reinstall store	Negative	0	1	0
Google Play Store	4f55827c-6203-45ab-9b43-4a1c3cf6781a	There is a current issue when converting amounts and after the conversion, I wanted to send a PDF to WhatsApp or another application, but the PDF file does not open.	Ahmed Hussain	##########	عميلنا العزيز، نأمل منك التواصل معنا على الرقم 8001242225 أو من خلال البريد الإلكتروني info@riyadbank.com و تزويدنا بملاحظاتك لنتمكن من خدمتك بشكل أفضل.	##########	0	ar	us		1	ar	current issue convert amount conversion want send pdf whatsapp another application pdf file open	Negative	0	1	0
Google Play Store	ce444555-b685-4c3d-b284-fbfdcf7a42ec	I don't know why it's like this, but it's better this way.	Yanabei Valley	##########	عميلنا العزيز، نأمل منك التواصل معنا على الرقم 8001242225 أو من خلال البريد الإلكتروني info@riyadbank.com و تزويدنا بملاحظاتك لنتمكن من خدمتك بشكل أفضل.	##########	0	ar	us		1	ar	dont know like good way	Neutral	1	0	0
Google Play Store	c81dc647-ca8e-4346-890a-28067b1362c4	The application is very very bad.	Ahmed Zezo	##########	عميلنا العزيز، يؤسفنا سماع ذلك ونأمل منك التواصل معنا على الرقم 8001242225 أو من خلال البريد الإلكتروني info@riyadbank.com و تزويدنا بملاحظاتك لنتمكن من خدمتك بشكل أفضل.	##########	0	ar	us		1	ar	application bad	Negative	1	0	0
Google Play Store	7dde6b3e-1fa4-40ec-bbf9-003bbf7e4eca	Sorry, but your app is really bad. I entered my information correctly, but it refuses to let me in.	LAMA	##########	عميلنا العزيز، يؤسفنا سماع ذلك ونأمل منك التواصل معنا على الرقم 8001242225 أو من خلال البريد الإلكتروني info@riyadbank.com و تزويدنا بملاحظاتك لنتمكن من خدمتك بشكل أفضل.	##########	0	ar	us		1	ar	sorry app really bad enter information correctly refuse let	Negative	1	1	0
Google Play Store	9242da49-07c7-43bc-839e-eb8ba573bedf	The application is very bad and it stopped working on my Huawei device with the Android system.	فاطمة الهوسه	##########	عميلنا العزيز، يؤسفنا سماع ذلك ونأمل منك التواصل معنا على الرقم 8001242225 أو من خلال البريد الإلكتروني info@riyadbank.com و تزويدنا بملاحظاتك لنتمكن من خدمتك بشكل أفضل.	##########	0	ar	us		1	ar	application bad stop work huawei device android system	Negative	1	1	0
Google Play Store	afa9e8a6-0f0c-4271-b76a-df029c9c00f4	The application has stopped working.	Mahmo Aziz	##########	عميلنا العزيز، يؤسفنا سماع ذلك ونأمل منك التواصل معنا على الرقم 8001242225 أو من خلال البريد الإلكتروني info@riyadbank.com و تزويدنا بملاحظاتك لنتمكن من خدمتك بشكل أفضل.	##########	0	ar	us		1	ar	application stop work	Negative	0	1	0
Google Play Store	b552973c-f337-4c82-8424-afab20c08d33	I have a problem with the application regarding transfers and adding beneficiaries. The icons related to them are not working. The transfer icon is not functioning when I click on it. Also, the add beneficiary icon is missing. Therefore, I am unable to transfer or add a beneficiary. What could be the reason for this? Please help me solve this issue.	Several modalities	##########	عميلنا العزيز، نأمل منك التواصل معنا على الرقم 8001242225 أو من خلال البريد الإلكتروني info@riyadbank.com و تزويدنا بملاحظاتك لنتمكن من خدمتك بشكل أفضل.	##########	4	ar	us		2	ar	problem application regard transfer add beneficiaries icons relate work transfer icon function click also add beneficiary icon miss therefore unable transfer add beneficiary could reason please help solve issue	Negative	0	1	0
Google Play Store	8a454d0e-3f1c-46ac-ad04-2b45852e36fd	Peace be upon you, the app was working fine and after the update, it no longer opens for me and gives me an error on the receiver. It's worth noting that my device is the same device. What is the problem?	sliman alharbi	##########	عميلنا العزيز، يؤسفنا سماع ذلك ونأمل منك التواصل معنا على الرقم 8001242225 أو من خلال البريد الإلكتروني info@riyadbank.com و تزويدنا بملاحظاتك لنتمكن من خدمتك بشكل أفضل.	##########	1	ar	us		5	ar	peace upon app work fine update long open give error receiver worth note device device problem	Neutral	0	1	0
Google Play Store	24d836c0-207b-4799-9b05-ac788a6fce86	An application worth 5 stars.	فُـ,ـؤآڊ الراشد	##########			0	ar	us		5	ar	application worth star	Positive	0	0	0
Google Play Store	70018958-8c13-4f8f-a8b7-e2dce11f0e2d	Excellent	حسين علي	##########			0	ar	us		5	ar	excellent	Positive	0	0	0
Google Play Store	c5698db7-1c72-4f33-b370-63b7902e201d	Very bad, it doesn't work and doesn't send codes... a terrible experience using the Riyadh mobile app... I wish I didn't open it, it's making me frustrated and ruining my nerves.	S.A Al_Otibi	##########	عميلنا العزيز، يؤسفنا سماع ذلك ونأمل منك التواصل معنا على الرقم 8001242225 أو من خلال البريد الإلكتروني info@riyadbank.com و تزويدنا بملاحظاتك لنتمكن من خدمتك بشكل أفضل.	##########	5	ar	us		1	ar	bad doesnt work doesnt send cod terrible experience use riyadh mobile app wish didnt open make frustrate ruin nerve	Negative	1	1	0
Google Play Store	71cc9645-0f10-4c0e-9b90-3b12615f1e29	The latest update has a problem with text messages. It doesn't accept the entered number and rejects it. We kindly request assistance.	عمر باكردس	##########	عميلنا العزيز، يؤسفنا سماع ذلك ونأمل منك التواصل معنا على الرقم 8001242225 أو من خلال البريد الإلكتروني info@riyadbank.com و تزويدنا بملاحظاتك لنتمكن من خدمتك بشكل أفضل.	##########	0	ar	us		1	ar	late update problem text message doesnt accept enter number reject kindly request assistance	Negative	0	1	0
Google Play Store	0bb9f186-7243-4288-a3dd-c7dc2dc0301c	The application is very bad and not working. What is the solution?	zezo almasri	##########	عميلنا العزيز، نأسف لسماع ذلك ونأمل منك تزويدنا بالملاحظة التي تواجهك عبر البريد الإلكتروني info@riyadbank.com أو يمكنك التواصل معنا على الرقم 8001242225 لنتمكن من خدمتك.	##########	0	ar	us		1	ar	application bad work solution	Negative	1	1	0
Google Play Store	2b123c11-e42c-4743-9202-10d004305c85	There is no option for conversion 🤬	ENIGMA ADMIRAL	##########	عميلنا العزيز، نأمل منك تزويدنا بالملاحظة التي تواجهك عبر البريد الإلكتروني info@riyadbank.com أو يمكنك التواصل معنا على الرقم 8001242225 لنتمكن من خدمتك.	##########	0	ar	us		1	ar	option conversion	Negative	0	1	0
Google Play Store	bba362de-db53-4fa6-8ad9-1049c9354726	The recent updates are the worst. The app only opens when the GPS location is turned on and the new update did not solve the problems. The updates are still unsuccessful.	Hamdan AL OMARY	##########	عميلنا العزيز، يؤسفنا سماع ذلك ونأمل منك التواصل معنا على الرقم 8001242225 أو من خلال البريد الإلكتروني info@riyadbank.com و تزويدنا بملاحظاتك لنتمكن من خدمتك بشكل أفضل.	##########	12	ar	us		1	ar	recent update bad app open gps location turn new update solve problems update still unsuccessful	Negative	1	1	0
Google Play Store	82475d8d-5700-4e8b-9b7f-6f0fe591831f	Thank you so much for solving the problem.	حسين الحمد	2023-07-09 08:05:00			3	ar	us		5	ar	thank much solve problem	Positive	0	0	0
Google Play Store	cf109759-47d9-469f-b88f-df6b888b57d4	The recent update is unnecessary. Hello, we are no longer able to view the Visa details. Please revert to the previous update, as I need to review the details of the transactions on my Visa card.	Mamo go	##########	عميلنا العزيز، يؤسفنا سماع ذلك ونأمل منك التواصل معنا على الرقم 8001242225 أو من خلال البريد الإلكتروني info@riyadbank.com و تزويدنا بملاحظاتك لنتمكن من خدمتك بشكل أفضل.	##########	0	ar	us		3	ar	recent update unnecessary hello long able view visa detail please revert previous update need review detail transactions visa card	Negative	0	1	1
Google Play Store	b3aa45d9-25b3-43d7-a602-949c0062d824	The application does not serve us at all when transferring to another account.	محمد البيشي	##########	عميلنا العزيز، يؤسفنا سماع ذلك ونأمل منك التواصل معنا على الرقم 8001242225 أو من خلال البريد الإلكتروني info@riyadbank.com و تزويدنا بملاحظاتك لنتمكن من خدمتك بشكل أفضل.	##########	0	ar	us		5	ar	application serve us transfer another account	Negative	0	1	0
Google Play Store	bc285ca6-a4b0-4770-b727-393a7f55eb11	The application is very bad, it doesn't open every time at the beginning of the month, and when it opens and updates, it takes a while until a new password and new number can be set, then it opens briefly and closes.	محمد نوح	2023-07-08 09:27:00	عميلنا العزيز، يؤسفنا سماع ذلك ونأمل منك التواصل معنا على الرقم 8001242225 أو من خلال البريد الإلكتروني info@riyadbank.com و تزويدنا بملاحظاتك لنتمكن من خدمتك بشكل أفضل.	##########	0	ar	us		1	ar	application bad doesnt open every time begin month open update take new password new number set open briefly close	Negative	1	1	0
Google Play Store	06908c8d-1fdf-4dc9-96bc-a32733877cf9	Excellent with Bank Al Riyadh.	الدحمي للرحلات البرية مستكشف	2023-07-08 09:05:00			0	ar	us		5	ar	excellent bank al riyadh	Positive	0	0	0
Google Play Store	e3ec924a-3e99-48cd-a3f4-e87e98820301	Every day, Al-Riyadh Bank releases a terrible update and their service is the worst. We are transferring from Al-Riyadh Bank to AlAhli Bank and AlRajhi Bank.	عبدالعزيز القاسمي	2023-07-07 06:36:00			1	ar	us		1	ar	every day alriyadh bank release terrible update service bad transfer alriyadh bank alahli bank alrajhi bank	Negative	1	1	0
Google Play Store	1dfeec22-21b8-496f-9e86-e401a1cf2799	I believe the appropriate translation for the given Arabic text is: "To apply what is fitting, absolutely, in a respectable bank like yours."	NIMSISER	##########			0	ar	us		1	ar	believe appropriate translation give arabic text apply fit absolutely respectable bank like	Neutral	1	0	0
Google Play Store	0e1dd90f-fbca-4994-b4ca-72644b76cd4d	A failed individual who rejects progress. All banks serve customers. We ask those responsible for the program to fix it.	chaz me	##########			0	ar	us		1	ar	fail individual reject progress bank serve customers ask responsible program fix	Negative	0	1	0
Google Play Store	774d90e0-23b0-4818-9b17-ffa984a0fa74	I have just opened an account and I want to register in the application. I followed the steps, but after choosing the password, it does not let me in. I have tried and they send me a message to update my ID data, but until now, I have not been able to complete the account opening process.	ام فهد	2023-07-06 05:07:00	عميلنا العزيز، يؤسفنا سماع ذلك ونأمل منك التواصل معنا على الرقم 8001242225 أو من خلال البريد الإلكتروني info@riyadbank.com و تزويدنا بملاحظاتك لنتمكن من خدمتك بشكل أفضل.	##########	3	ar	us		1	ar	open account want register application follow step choose password let try send message update id data able complete account open process	Negative	0	1	0
Google Play Store	061db281-978c-43cd-a28d-42eef066c196	Very good	Mohammed Osman	##########			0	ar	us		2	ar	good	Positive	0	0	0
Google Play Store	e95c2c22-2611-4442-83ae-a99fc2ed77b4	"It is a fantastic and user-friendly application that provides you with all the services... Thank you to the management of Bank Al-Riyadh ⭐⭐⭐⭐⭐"	Waliyd Albahdad	##########			0	ar	us		5	ar	fantastic userfriendly application provide service thank management bank alriyadh	Positive	1	0	0
Google Play Store	ceba4820-fece-48c1-b1fb-06c68ed8677f	The application is not working and an error message appears.	Saja Abdullah	##########	عميلنا العزيز، يؤسفنا سماع ذلك ونأمل منك التواصل معنا على الرقم 8001242225 أو من خلال البريد الإلكتروني info@riyadbank.com و تزويدنا بملاحظاتك لنتمكن من خدمتك بشكل أفضل.	##########	0	ar	us		4	ar	application work error message appear	Negative	0	1	0
Google Play Store	be0c95f4-8805-43d0-96f1-652d54dce45a	"The application is bad and complicated. I wish they would revert to the old update."	طلال العنزي	2023-07-04 03:00:00	عميلنا العزيز، نأمل منك التواصل معنا على الرقم 8001242225 أو من خلال البريد الإلكتروني info@riyadbank.com و تزويدنا بملاحظاتك لنتمكن من خدمتك بشكل أفضل.	##########	0	ar	us		1	ar	application bad complicate wish would revert old update	Negative	1	0	0
Google Play Store	e593e680-fcc5-4e71-ad57-56b90907d5d2	This program is impractical and very slow.	هاني عبدالله	##########	عميلنا العزيز، يؤسفنا سماع ذلك ونأمل منك التواصل معنا على الرقم 920002470 أو من خلال البريد الإلكتروني info@riyadbank.com و تزويدنا بملاحظاتك لنتمكن من خدمتك بشكل أفضل.	##########	0	ar	us		5	ar	program impractical slow	Negative	1	0	1
Google Play Store	f9e1417e-4024-405d-9688-2f7cbd2e10ea	The application needs fixing.	ali moha	##########			0	ar	us		5	ar	application need fix	Negative	1	0	0
Google Play Store	ff4288d4-3487-47e4-a0b9-7626f171860d	The latest update went from bad to worse.	Abdirahman Adam	2023-07-03 08:42:00			0	ar	us		1	ar	late update go bad bad	Negative	1	0	0
Google Play Store	e44cfc8a-fd36-4dc6-86fe-a0c91c3ffb13	The application no longer displays credit card transactions.	Z Non	2023-07-03 04:56:00			0	ar	us		1	ar	application long display credit card transactions	Neutral	0	1	0
Google Play Store	815124f7-9ded-4281-97e4-8fda871a37b4	Unfortunately, the latest update is bad. I can't log in and if I do, it freezes. Please find a solution for us.	عبدالكريم بن محمد	##########			0	ar	us		1	ar	unfortunately late update bad cant log freeze please find solution us	Negative	1	1	1
Google Play Store	d9932294-a970-4904-8736-88ededcee4a8	Unfortunately, the application is bad. It keeps refusing to let me in, so now I have to delete it and reinstall it again for a week. I've been trying to access the application, but it keeps refusing, not to mention the delay in receiving messages with codes in them.	هيمو 455411	##########	عميلنا العزيز، يؤسفنا سماع ذلك ونأمل منك التواصل معنا على الرقم 8001242225 أو من خلال البريد الإلكتروني info@riyadbank.com و تزويدنا بملاحظاتك لنتمكن من خدمتك بشكل أفضل.	##########	0	ar	us		1	ar	unfortunately application bad keep refuse let delete reinstall week ive try access application keep refuse mention delay receive message cod	Negative	1	1	1
Google Play Store	4c311c95-e069-44dd-9561-e0171693ef08	The program doesn't work after the update.	شريف ابوحسن	##########			0	ar	us		1	ar	program doesnt work update	Negative	0	1	0
Google Play Store	60f41d49-fed4-4cbd-b22a-87a505a88126	The application used to work excellently before, but it has become very bad recently. The issue I have encountered is with authentication. Even when the message arrives, the keyboard does not appear, and when registering the fingerprint, the application only works upon the first login and then does not accept the fingerprint or anything else. Kindly update the application and address the issues.	Soliman alfrhan	##########			85	ar	us		2	ar	application use work excellently become bad recently issue encounter authentication even message arrive keyboard appear register fingerprint application work upon first login accept fingerprint anything else kindly update application address issue	Negative	1	1	0
Google Play Store	8bf3f531-c058-4c52-911c-a1b0971c52cf	Direct access is required through fingerprint, similar to quick access for making payments or transfers.	أبو ريان	##########			8	ar	us		5	ar	direct access require fingerprint similar quick access make payments transfer	Neutral	1	1	0
Google Play Store	4f63ddc7-fd31-4aac-bcd3-107fce671fc1	Okay.	حمزه الشهري	2023-07-02 02:52:00			0	ar	us		5	ar	okay	Neutral	0	0	0
Google Play Store	5e2b3479-a265-4838-a711-9f7928f0f18d	One of the worst banking apps. The fingerprint sometimes works and sometimes doesn't. With each update, you have to reactivate the fingerprint. The application hangs on the 27th and 28th of every month, and they are not interested in customers. The app of Al Rajhi Bank and Alinma Bank is better than this app, and what frustrates you is that they respond to your negative evaluation in English, whi…	Abdullah Alsaadoon	##########	عميلنا العزيز، يؤسفنا سماع ذلك ونأمل منك التواصل معنا على الرقم 920002470 أو من خلال البريد الإلكتروني info@riyadbank.com و تزويدنا بملاحظاتك لنتمكن من خدمتك بشكل أفضل.	##########	96	ar	us		1	ar	one bad bank apps fingerprint sometimes work sometimes doesnt update reactivate fingerprint application hang th th every month interest customers app al rajhi bank alinma bank good app frustrate respond negative evaluation english write evaluation arabic want call bank hotline cost money	Negative	1	1	1
Google Play Store	62f2a1df-143f-4f72-a900-83a712c9f4b1	Good.	ابراهيم حلل	2023-07-01 05:42:00			0	ar	us		4	ar	good	Positive	0	0	0
Google Play Store	1484fe43-ed80-4928-8bf7-ae223a3508e9	Not practical.	عبدالله مكي	##########	عميلنا العزيز، نأمل منك التواصل معنا على الرقم 8001242225 أو من خلال البريد الإلكتروني info@riyadbank.com و تزويدنا بملاحظاتك لنتمكن من خدمتك بشكل أفضل.	2023-07-01 03:26:00	0	ar	us		2	ar	practical	Negative	0	0	0
Google Play Store	1838de68-7194-4407-b458-7c1093e8bd61	Bad program, every day it asks for a new password and the fingerprint scanner doesn't work 👎	AhmeḎ	##########	عميلنا العزيز، يؤسفنا سماع ذلك ونأمل منك التواصل معنا على الرقم 8001242225 أو من خلال البريد الإلكتروني info@riyadbank.com و تزويدنا بملاحظاتك لنتمكن من خدمتك بشكل أفضل.	##########	0	ar	us		1	ar	bad program every day ask new password fingerprint scanner doesnt work	Negative	1	1	0
Google Play Store	0e866a2f-76d0-4e73-ac22-f382006545fe	Banque Riyadh is my bank.	رامي الحربي	##########			0	ar	us		5	ar	banque riyadh bank	Neutral	0	0	0
Google Play Store	d298aecf-de90-4422-a4e4-6701e7597c8b	Very bad.	faras saeed	##########	عميلنا العزيز، يؤسفنا سماع ذلك ونأمل منك التواصل معنا على الرقم 8001242225 أو من خلال البريد الإلكتروني info@riyadbank.com و تزويدنا بملاحظاتك لنتمكن من خدمتك بشكل أفضل.	##########	0	ar	us		1	ar	bad	Negative	1	0	0
Google Play Store	e249772d-090e-402f-ac1b-51eac307ce0f	Excellent very much	مؤيد الهاشم	##########			0	ar	us		5	ar	excellent much	Positive	0	0	0
Google Play Store	c222798a-6d86-42b2-961a-72c4e191d0db	Very bad	ابو محمد	##########	عميلنا العزيز، يؤسفنا سماع ذلك ونأمل منك التواصل معنا على الرقم 8001242225 أو من خلال البريد الإلكتروني info@riyadbank.com و تزويدنا بملاحظاتك لنتمكن من خدمتك بشكل أفضل.	##########	0	ar	us		1	ar	bad	Negative	1	0	0
Google Play Store	939c2cd2-2bc6-4177-ad9e-29498ed8543c	Excellent nice	Abdorahman HUSSEN	##########			0	ar	us		5	ar	excellent nice	Positive	0	0	0
Google Play Store	b5bf4f67-d151-4a40-b75b-a50ef285a91d	Bad	MOHAMMAD DALEM	##########	عميلنا العزيز، يؤسفنا سماع ذلك ونأمل منك التواصل معنا على الرقم 8001242225 أو من خلال البريد الإلكتروني info@riyadbank.com و تزويدنا بملاحظاتك لنتمكن من خدمتك بشكل أفضل.	##########	0	ar	us		2	ar	bad	Neutral	1	0	0
Google Play Store	d5aa97a9-f01d-4d3d-9429-3dc7e6b1522c	I have failed multiple times trying to log in, and a message appears asking for location verification. When I choose to verify, another message appears stating that I must either stop or delete.	أبو محمد السمين	##########	عميلنا العزيز، نأسف لسماع ذلك ونأمل منك تزويدنا بالملاحظة التي تواجهك عبر البريد الإلكتروني info@riyadbank.com أو يمكنك التواصل معنا على الرقم 8001242225 لنتمكن من خدمتك.	##########	0	ar	us		1	ar	fail multiple time try log message appear ask location verification choose verify another message appear state must either stop delete	Negative	0	1	0
Google Play Store	471b16b2-268e-4dfe-a8fb-9c990ceb19c0	Very, very bad week and I've been trying.	Eman Alama	##########	عميلنا العزيز، نأسف لسماع ذلك ونأمل منك تزويدنا بالملاحظة التي تواجهك عبر البريد الإلكتروني info@riyadbank.com أو يمكنك التواصل معنا على الرقم 8001242225 لنتمكن من خدمتك.	##########	0	ar	us		1	ar	bad week ive try	Negative	1	0	0
Google Play Store	edbf13c7-add3-49db-bb2d-a02e86937d34	I don't know.	مبارك ماجد	##########			0	ar	us		2	ar	dont know	Neutral	1	0	0
Google Play Store	49a93c05-7de5-43d1-be52-216a98a16d1f	Very bad.	العقرب العقرب	##########	عميلنا العزيز، يؤسفنا سماع ذلك ونأمل منك التواصل معنا على الرقم 8001242225 أو من خلال البريد الإلكتروني info@riyadbank.com و تزويدنا بملاحظاتك لنتمكن من خدمتك بشكل أفضل.	##########	0	ar	us		5	ar	bad	Negative	1	0	0
Google Play Store	0800aaf6-a81a-41e6-9644-5e833ef657ed	Service feature and security	حبيب الروح	##########			0	ar	us		5	ar	service feature security	Neutral	0	1	0
Google Play Store	56e10249-0065-4329-9879-b9ec20a87143	The application has not been working since yesterday.	Montasir Nasr	##########	عميلنا العزيز، نأمل منك التواصل معنا على الرقم 8001242225 أو من خلال البريد الإلكتروني info@riyadbank.com و تزويدنا بملاحظاتك لنتمكن من خدمتك بشكل أفضل.	##########	0	ar	us		1	ar	application work since yesterday	Negative	0	1	0
Google Play Store	01fc5c5e-affe-485e-ae3b-da5ae299123c	"Bank Biserab has leaked customer data and deducted 40 Riyals from my account at 13:40. I do not recommend opening an account within Riyadh Bank. It is worth mentioning that I am interested in technology and know how to hack and stop it, but what happened is a leak of customer data by the bank."	hatem hassan	##########	عميلنا العزيز، نأمل منك التواصل معنا على الرقم 8001242225 أو من خلال البريد الإلكتروني info@riyadbank.com و تزويدنا بملاحظاتك لنتمكن من خدمتك بشكل أفضل.	##########	0	ar	us		1	ar	bank biserab leak customer data deduct riyals account recommend open account within riyadh bank worth mention interest technology know hack stop happen leak customer data bank	Negative	0	1	0
Google Play Store	3b0b5be4-6c81-4ff7-a0ea-901810e6409d	The new application does not support PDF files. If you want to download a payment receipt or any document, why is that?	محمد الشاخوري	##########	عميلنا العزيز، نأمل منك التواصل معنا على الرقم 8001242225 أو من خلال البريد الإلكتروني info@riyadbank.com و تزويدنا بملاحظاتك لنتمكن من خدمتك بشكل أفضل.	##########	0	ar	us		1	ar	new application support pdf file want download payment receipt document	Negative	0	1	0
Google Play Store	01b1888d-3875-45c7-a7d0-b7dfdfb40378	After the update, it does not open.	Mohamed Alshrafy	##########	عميلنا العزيز، نأمل منك التواصل معنا على الرقم 8001242225 أو من خلال البريد الإلكتروني info@riyadbank.com و تزويدنا بملاحظاتك لنتمكن من خدمتك بشكل أفضل.	##########	0	ar	us		5	ar	update open	Negative	0	1	0
Google Play Store	4dd0ca20-364f-4ed4-8125-ce561d82adcd	Very bad, it has been three days since it stopped working.	علي غبري	##########	عميلنا العزيز، يؤسفنا سماع ذلك ونأمل منك التواصل معنا على الرقم 8001242225 أو من خلال البريد الإلكتروني info@riyadbank.com و تزويدنا بملاحظاتك لنتمكن من خدمتك بشكل أفضل.	##########	0	ar	us		5	ar	bad three days since stop work	Negative	1	1	0
Google Play Store	5a0feee0-a9a6-44bd-873c-ab67ecbc06f0	Majed Faraj	ماجد فرج	##########			0	ar	us		5	ar	majed faraj	Neutral	0	0	0
Google Play Store	683d655b-8be2-4ae2-832f-4ca3f64f37f6	The application, after the latest update, is very very slow and I have not been able to benefit from any options because I couldn't activate it so far, therefore it is useless.	وسام الراشدي	##########	عميلنا العزيز، يؤسفنا سماع ذلك ونأمل منك التواصل معنا على الرقم 8001242225 أو من خلال البريد الإلكتروني info@riyadbank.com و تزويدنا بملاحظاتك لنتمكن من خدمتك بشكل أفضل.	##########	2	ar	us		1	ar	application late update slow able benefit options couldnt activate far therefore useless	Negative	0	1	1
Google Play Store	7b950a47-18f9-478c-beb8-399581e2c2a9	He requests the location to be determined and the location is active.	بسم الله الرحمن الرحيم	##########	عميلنا العزيز، نأمل منك التواصل معنا على الرقم 8001242225 أو من خلال البريد الإلكتروني info@riyadbank.com و تزويدنا بملاحظاتك لنتمكن من خدمتك بشكل أفضل.	##########	0	ar	us		1	ar	request location determine location active	Neutral	0	1	0
Google Play Store	e4cf7a60-ae40-4c3c-b623-8c650e782b6a	The worst banking app, Banque Tawreed, has evolved and Riyadh is your hiding place.	YASSER ABD AULAZIZ	##########	عميلنا العزيز، يؤسفنا سماع ذلك ونأمل منك التواصل معنا على الرقم 8001242225 أو من خلال البريد الإلكتروني info@riyadbank.com و تزويدنا بملاحظاتك لنتمكن من خدمتك بشكل أفضل.	##########	0	ar	us		1	ar	bad bank app banque tawreed evolve riyadh hide place	Negative	1	0	0
Google Play Store	0ea3db8e-f3c0-4b8e-840c-016019d6d2dd	This application is the worst. I swear, I am going to leave Riyadh Bank because of your treatment with us.	Abdu Mosazaher	##########	عميلنا العزيز، يؤسفنا سماع ذلك ونأمل منك التواصل معنا على الرقم 8001242225 أو من خلال البريد الإلكتروني info@riyadbank.com و تزويدنا بملاحظاتك لنتمكن من خدمتك بشكل أفضل.	##########	0	ar	us		1	ar	application bad swear go leave riyadh bank treatment us	Negative	1	0	0
Google Play Store	62591443-c82a-4f45-b9b6-1e61acaa08d5	The application "Every day in Shan" sometimes opens and sometimes doesn't open. The development and maintenance should be for the better, but it has been going downhill. When I try to open the app, it says either the name is wrong or the password is incorrect. What is the solution? I seek forgiveness from Almighty Allah and repent to Him.	خالد بوبشيت	##########	عميلنا العزيز، يؤسفنا سماع ذلك ونأمل منك التواصل معنا على الرقم 8001242225 أو من خلال البريد الإلكتروني info@riyadbank.com و تزويدنا بملاحظاتك لنتمكن من خدمتك بشكل أفضل.	##########	0	ar	us		1	ar	application every day sometimes open sometimes doesnt open development maintenance good go downhill try open app say either name wrong password incorrect solution seek forgiveness almighty allah repent	Negative	1	1	0
Google Play Store	a5c7df0c-ee89-4eae-a02d-a1cf41fe0235	The application is excellent. However, since the last update, I am unable to share the receipt of financial transfers, and I get a message that the file is corrupted when I try to share the receipt. The review will be changed after the problem is resolved.	Amin Alabdullah	##########	عميلنا العزيز، نأمل منك التواصل معنا على الرقم 8001242225 أو من خلال البريد الإلكتروني info@riyadbank.com و تزويدنا بملاحظاتك لنتمكن من خدمتك بشكل أفضل.	##########	0	ar	us		2	ar	application excellent however since last update unable share receipt financial transfer get message file corrupt try share receipt review change problem resolve	Negative	0	1	0
Google Play Store	d04eb61e-5cf2-4303-a4a3-1fc0afec78e7	The application is very bad and doesn't work.	tasmemat_decor online	##########	عميلنا العزيز، يؤسفنا سماع ذلك ونأمل منك التواصل معنا على الرقم 8001242225 أو من خلال البريد الإلكتروني info@riyadbank.com و تزويدنا بملاحظاتك لنتمكن من خدمتك بشكل أفضل.	##########	0	ar	us		1	ar	application bad doesnt work	Negative	1	1	0
Google Play Store	09fa6a97-4dd6-4700-ace9-e5480f688aed	The easiest banking services application is Bank Al Riyadh.	ابراهيم الفرحان	##########			0	ar	us		1	ar	easy bank service application bank al riyadh	Positive	0	0	0
Google Play Store	7512b359-9571-47fc-8f99-45721abff531	The application is excellent.	أحمد عباس	##########			0	ar	us		5	ar	application excellent	Positive	0	0	0
Google Play Store	8d60887b-5762-4757-82ff-6be587d299b6	Alhamdulillah.	H Ag	##########			0	ar	us		5	ar	alhamdulillah	Positive	1	0	0
Google Play Store	f1fe3856-0b1c-4787-8593-60afd8b0b68d	Unfortunately, it is not working.	احمد الخليف	##########	عميلنا العزيز، نأمل منك التواصل معنا على الرقم 8001242225 أو من خلال البريد الإلكتروني info@riyadbank.com و تزويدنا بملاحظاتك لنتمكن من خدمتك بشكل أفضل.	##########	0	ar	us		1	ar	unfortunately work	Negative	0	1	0
Google Play Store	456b2a29-0ae6-478d-8d86-7350c50bb2b6	The new update is very bad. Once you update, you can't go back. I keep telling you that the username is wrong, but you keep typing it correctly and it still shows as wrong. If you want to recover the account, I forgot the password. It keeps saying it over and over again.	فاطمه النهدي	##########	عميلنا العزيز، يؤسفنا سماع ذلك ونأمل منك التواصل معنا على الرقم 8001242225 أو من خلال البريد الإلكتروني info@riyadbank.com و تزويدنا بملاحظاتك لنتمكن من خدمتك بشكل أفضل.	##########	0	ar	us		1	ar	new update bad update cant go back keep tell username wrong keep type correctly still show wrong want recover account forget password keep say	Negative	1	1	0
Google Play Store	7da3bdc2-eb2c-4728-9f53-ae247cef02f3	The Riyadh application is one of the best banking applications.	M T	##########			0	ar	us		3	ar	riyadh application one best bank applications	Positive	0	0	0
Google Play Store	0bff4d77-e63b-41ce-b2a3-972ede161289	The latest update is very bad, I can't log in.	احمد العمودي	##########	عميلنا العزيز، يؤسفنا سماع ذلك ونأمل منك التواصل معنا على الرقم 8001242225 أو من خلال البريد الإلكتروني info@riyadbank.com و تزويدنا بملاحظاتك لنتمكن من خدمتك بشكل أفضل.	##########	0	ar	us		1	ar	late update bad cant log	Negative	1	1	0
Google Play Store	90916cef-96e3-43a4-802a-6fa5076a785d	What is your level?	سلطان قيسي	##########			0	ar	us		5	ar	level	Neutral	0	0	0
Google Play Store	7f37309b-a130-4828-9f75-d110ff6230e4	The application is very bad, it does not open and does not deliver the message for the password.	Aff Kko	##########	عميلنا العزيز، يؤسفنا سماع ذلك ونأمل منك التواصل معنا على الرقم 8001242225 أو من خلال البريد الإلكتروني info@riyadbank.com و تزويدنا بملاحظاتك لنتمكن من خدمتك بشكل أفضل.	##########	0	ar	us		5	ar	application bad open deliver message password	Negative	1	1	0
Google Play Store	2c39c49b-cee0-42ca-ab85-42fe1984318a	The application is not working and reloading it has been done without any benefit.	أبو محمد	##########	عميلنا العزيز، نأمل منك التواصل معنا على الرقم 8001242225 أو من خلال البريد الإلكتروني info@riyadbank.com و تزويدنا بملاحظاتك لنتمكن من خدمتك بشكل أفضل.	##########	0	ar	us		1	ar	application work reload do without benefit	Negative	0	1	0
Google Play Store	b6cc1b6e-cb46-4de9-9e7a-79e20573b66b	Very good	sondos Eshke	##########	عميلنا العزيز، يؤسفنا سماع ذلك ونأمل منك التواصل معنا على الرقم 8001242225 أو من خلال البريد الإلكتروني info@riyadbank.com و تزويدنا بملاحظاتك لنتمكن من خدمتك بشكل أفضل.	##########	0	ar	us		1	ar	good	Positive	0	0	0
Google Play Store	e4b24f70-cf61-4624-87a7-4323c1d558e3	"Strange, he doesn't work during the holiday? What is the reason? Please advise me."	Nlo A	##########	عميلنا العزيز، نأمل منك التواصل معنا على الرقم 8001242225 أو من خلال البريد الإلكتروني info@riyadbank.com و تزويدنا بملاحظاتك لنتمكن من خدمتك بشكل أفضل.	##########	0	ar	us		1	ar	strange doesnt work holiday reason please advise	Negative	1	1	0
Google Play Store	b97270aa-bf70-4333-8b99-5acdd71c3869	Very bad. When we enter the number one for entry, the automated caller says: "You have not entered the correct number."	عزوز	##########	عميلنا العزيز، يؤسفنا سماع ذلك ونأمل منك التواصل معنا على الرقم 8001242225 أو من خلال البريد الإلكتروني info@riyadbank.com و تزويدنا بملاحظاتك لنتمكن من خدمتك بشكل أفضل.	##########	0	ar	us		1	ar	bad enter number one entry automate caller say enter correct number	Negative	1	1	0
Google Play Store	766aae3e-84a8-4e7c-b2a8-be5ae9e4be0e	Beautiful.	MAHMOUD Al-Jilani	##########			0	ar	us		5	ar	beautiful	Positive	0	0	0
Google Play Store	335f5cae-947a-4ab6-96d4-277b0be7c6dc	Good	ابو رضا	##########			0	ar	us		3	ar	good	Positive	0	0	0
Google Play Store	af786019-9a91-4c81-a418-f9a868ed4720	Good behavior / Good treatment	محمدقايد هناف	##########			0	ar	us		5	ar	good behavior good treatment	Positive	0	0	0
Google Play Store	a26443c4-c6b8-478c-ba88-8110eb1a6b34	Location service	Fawaz Alghamdi	##########			0	ar	us		5	ar	location service	Neutral	0	1	0
Google Play Store	19d5b598-c621-4807-8a47-289070fd9645	Excellent and a very very very wonderful bank.	تالي الليل (عناد)	##########			0	ar	us		5	ar	excellent wonderful bank	Positive	0	0	0
Google Play Store	3cb25c81-b95e-4386-9b7c-88789ac8f2b4	He was excellent with his new appearance. After the latest update, the interaction became easy and flexible. However, the login modification became worse than before and very difficult. After talking, a new complexity was added, which is fingerprint authentication. And now it's the worst application among banks and the worst interaction and customer service. It always seems to be getting worse. E…	ابو حسن	##########	عميلنا العزيز، يؤسفنا سماع ذلك ونأمل منك التواصل معنا على الرقم 8001242225 أو من خلال البريد الإلكتروني info@riyadbank.com و تزويدنا بملاحظاتك لنتمكن من خدمتك بشكل أفضل.	##########	2	ar	us		1	ar	excellent new appearance late update interaction become easy flexible however login modification become bad difficult talk new complexity add fingerprint authentication bad application among bank bad interaction customer service always seem get bad every review bank reveal decline level	Positive	1	1	0
Google Play Store	e945b317-cfc8-44e8-9ad2-35c89867a901	The problem has been solved, the transfers are now working.	abo ahmed	##########	عميلنا العزيز، يؤسفنا سماع ذلك ونأمل منك التواصل معنا على الرقم 8001242225 أو من خلال البريد الإلكتروني info@riyadbank.com و تزويدنا بملاحظاتك لنتمكن من خدمتك بشكل أفضل.	##########	0	ar	us		5	ar	problem solve transfer work	Neutral	0	1	0
Google Play Store	e2df0e0e-471a-4d4b-825b-379378737eb3	The application is the worst as it does not allow for fingerprint recognition or quick login.	em	##########			0	ar	us		1	ar	application bad allow fingerprint recognition quick login	Negative	1	1	0
Google Play Store	4f3627e1-28a2-4934-8a2d-9b53b1b067b0	The application is very bad, very bad, very bad.	mohamed alotaibi	##########	عميلنا العزيز، يؤسفنا سماع ذلك ونأمل منك التواصل معنا على الرقم 8001242225 أو من خلال البريد الإلكتروني info@riyadbank.com و تزويدنا بملاحظاتك لنتمكن من خدمتك بشكل أفضل.	##########	0	ar	us		1	ar	application bad bad bad	Negative	1	0	0
Google Play Store	2540ef7f-82d1-46b6-a651-7e5fb0c02df7	Good	محمد الجطيل	##########			0	ar	us		3	ar	good	Positive	0	0	0
Google Play Store	16701781-70ad-4c22-ada6-fadb17e6f8c3	Failed update. Any operation I try to perform, it ends up with a corrupted PDF file.	بندر القحطاني (ابو رائف)	##########	عميلنا العزيز، نأمل منك التواصل معنا على الرقم 8001242225 أو من خلال البريد الإلكتروني info@riyadbank.com و تزويدنا بملاحظاتك لنتمكن من خدمتك بشكل أفضل.	##########	0	ar	us		1	ar	fail update operation try perform end corrupt pdf file	Negative	0	1	0
Google Play Store	ad45e4cf-c9f5-4cda-8fd8-fdec8a2e7bf9	Even the application is as bad as their customer service at Bank Al Riyadh.	ابوفهد العسيري	##########	عميلنا العزيز، يؤسفنا سماع ذلك ونأمل منك التواصل معنا على الرقم 8001242225 أو من خلال البريد الإلكتروني info@riyadbank.com و تزويدنا بملاحظاتك لنتمكن من خدمتك بشكل أفضل.	##########	0	ar	us		1	ar	even application bad customer service bank al riyadh	Negative	1	0	0
Google Play Store	7b504e84-d2bd-42ad-b020-3d10e768d4b0	Very good.	محمد علي	##########			0	ar	us		5	ar	good	Positive	0	0	0
Google Play Store	d989435f-122d-47c2-8c84-498cf7d29faf	An application that does not accept changing the password. Authentication is not working either. It has been a week and it has not let me in or allowed any changes. And also, my ATM card. Its numbers are getting erased every week, and if I need any number I can't find it.	Aboood Alharbe	##########	عميلنا العزيز، نأمل منك التواصل معنا على الرقم 8001242225 أو من خلال البريد الإلكتروني info@riyadbank.com و تزويدنا بملاحظاتك لنتمكن من خدمتك بشكل أفضل.	##########	0	ar	us		2	ar	application accept change password authentication work either week let allow change also atm card number get erase every week need number cant find	Negative	0	1	0
Google Play Store	9a71c165-0dfd-405d-9e24-ccb8bd2a5a5c	Very good.	عبدالله الدوسري (الفجر البعيد)	##########			0	ar	us		4	ar	good	Positive	0	0	0
Google Play Store	664184ff-7c60-41a2-8f65-2572c2bd724b	A program to delay the number for a while. I do not recommend downloading it.	محن وان	##########	عميلنا العزيز، نأمل منك التواصل معنا على الرقم 8001242225 أو من خلال البريد الإلكتروني info@riyadbank.com و تزويدنا بملاحظاتك لنتمكن من خدمتك بشكل أفضل.	##########	0	ar	us		1	ar	program delay number recommend download	Negative	1	0	1
Google Play Store	04edd651-73ea-4c27-a9d5-bbc3e3480a44	They like to live in another world; I'm sure they know about Al-Rajhi, Al-Ahli, and their predecessors, but they don't try to compete with them.	أبو محمد	##########			0	ar	us		1	ar	like live another world im sure know alrajhi alahli predecessors dont try compete	Neutral	1	0	0
Google Play Store	960c4bee-0927-48e5-a89d-b1f18928f55e	Very good.	مشعل العنزي	##########			0	ar	us		5	ar	good	Positive	0	0	0
Google Play Store	a271ffdf-e700-4311-96d8-a263ffe5e309	Excellent	علاء ابوسعيفان	##########			0	ar	us		5	ar	excellent	Positive	0	0	0
Google Play Store	f33c8744-390e-4736-8176-813ad88d0c9c	More than excellent	Fawzi Mohamed	##########			0	ar	us		5	ar	excellent	Positive	0	0	0
Google Play Store	0e694c34-3114-4aba-9bf3-fd6d9e98ba72	The program, every time, requires me to register the username, choose a reminder, and log out. And if I enter again, I have to register the username again, and the transfer option does not open at all.	قتيل الحب	##########	عميلنا العزيز، نأمل منك التواصل معنا على الرقم 8001242225 أو من خلال البريد الإلكتروني info@riyadbank.com و تزويدنا بملاحظاتك لنتمكن من خدمتك بشكل أفضل.	##########	0	ar	us		1	ar	program every time require register username choose reminder log enter register username transfer option open	Negative	0	1	0
Google Play Store	887cb367-c6f9-4b86-916f-50102ff4cd61	The next month's update is terrible. It affects my salary and I'm tired of all the program entries. I have to enter a new username with a password.	محمد الهجري	##########	عميلنا العزيز، يؤسفنا سماع ذلك ونأمل منك التواصل معنا على الرقم 8001242225 أو من خلال البريد الإلكتروني info@riyadbank.com و تزويدنا بملاحظاتك لنتمكن من خدمتك بشكل أفضل.	##########	0	ar	us		1	ar	next months update terrible affect salary im tire program entries enter new username password	Negative	1	1	0
Google Play Store	4d2e6982-75ee-46ff-b87b-6e9b0ef34eaa	A very, very good application, Abu K.	محمد مستكشف شارة الباحث الباحث شارة	##########	عميلنا العزيز، نأمل منك التواصل معنا على الرقم 8001242225 أو من خلال البريد الإلكتروني info@riyadbank.com و تزويدنا بملاحظاتك لنتمكن من خدمتك بشكل أفضل.	##########	0	ar	us		1	ar	good application abu k	Positive	0	0	0
Google Play Store	2d8a9d95-d6b3-4b12-a349-b489b30b732e	Something that cannot be updated at all.	ساري الليل	##########	عميلنا العزيز، يؤسفنا سماع ذلك ونأمل منك التواصل معنا على الرقم 8001242225 أو من خلال البريد الإلكتروني info@riyadbank.com و تزويدنا بملاحظاتك لنتمكن من خدمتك بشكل أفضل.	##########	0	ar	us		1	ar	something update	Negative	1	0	0
Google Play Store	2e509db7-15f5-463a-a0c5-183e7332ee6a	Very bad	ابو نواااف	##########	عميلنا العزيز، يؤسفنا سماع ذلك ونأمل منك التواصل معنا على الرقم 8001242225 أو من خلال البريد الإلكتروني info@riyadbank.com و تزويدنا بملاحظاتك لنتمكن من خدمتك بشكل أفضل.	##########	1	ar	us		1	ar	bad	Negative	1	0	0
Google Play Store	c81ae74b-0b73-455a-9c09-269549b8d4c7	nice	Hd Hx	##########			0	ar	us		4	ar	nice	Positive	0	0	0
Google Play Store	e303fc14-fd42-43d2-9dac-ce48bbcc6edf	The application is very, very, very bad, and there is no use of it at all. Also, when going to the bank, it only serves to waste your time. What should we do? The services are disabled, and there is no solution. If you want to apply, you should solve the problems instead of giving a uniform response to all complaints. You need to contact us. It has been two days, and it keeps reminding me to acti…	weam ismaiel	##########	عميلنا العزيز، يؤسفنا سماع ذلك ونأمل منك التواصل معنا على الرقم 8001242225 أو من خلال البريد الإلكتروني info@riyadbank.com و تزويدنا بملاحظاتك لنتمكن من خدمتك بشكل أفضل.	##########	14	ar	us		1	ar	application bad use also go bank serve waste time service disable solution want apply solve problems instead give uniform response complaints need contact us two days keep remind activate location do problem still persist please provide solution	Negative	1	1	1
Google Play Store	1b0edad0-4bee-4fba-9829-0fe7654ce6f4	Bad developer, in short, every time he doesn't accept the password, and every time you want to log in, you have to reset it. Where are you living?!	mjK 94	##########	عميلنا العزيز، يؤسفنا سماع ذلك ونأمل منك التواصل معنا على الرقم 8001242225 أو من خلال البريد الإلكتروني info@riyadbank.com و تزويدنا بملاحظاتك لنتمكن من خدمتك بشكل أفضل.	##########	1	ar	us		1	ar	bad developer short every time doesnt accept password every time want log reset live	Negative	1	1	0
Google Play Store	81abfbed-04fe-49ba-98a4-ab21d7e60b52	Riyad Mobile is an excellent Islamic banking service that offers a variety of services. I highly recommend it to everyone.	alrehilim	##########			0	ar	us		5	ar	riyad mobile excellent islamic bank service offer variety service highly recommend everyone	Positive	0	0	0
Google Play Store	c45fa64d-0962-48ee-aa88-89179732f573	The worst application among bank applications, the registration page is very poor and difficult. I hope there will be improvements made to the application.	Ahmad Jme	##########	عميلنا العزيز، يؤسفنا سماع ذلك ونأمل منك التواصل معنا على الرقم 8001242225 أو من خلال البريد الإلكتروني info@riyadbank.com و تزويدنا بملاحظاتك لنتمكن من خدمتك بشكل أفضل.	##########	6	ar	us		1	ar	bad application among bank applications registration page poor difficult hope improvements make application	Negative	1	0	0
Google Play Store	b287565f-4f8a-4e21-a050-61a2f2da1ff9	I have a Motorola G73 device, and it seems that there is a conflict in the login page of the application between the accounts of the cards and the main account, which greatly affects the usability.	Mohammed Murshed	##########	عميلنا العزيز، نأمل منك التواصل معنا على الرقم 8001242225 أو من خلال البريد الإلكتروني info@riyadbank.com و تزويدنا بملاحظاتك لنتمكن من خدمتك بشكل أفضل.	##########	0	ar	us		3	ar	motorola g device seem conflict login page application account card main account greatly affect usability	Negative	1	1	0
Google Play Store	69e68d57-128e-4f62-9479-e1a65982bfb4	We hope for the development of the program. The application frequently hangs and asks for GPS location to be specified. We kindly request a solution as quickly as possible for the sake of customer service and satisfaction.	Nasser ALHarbi	##########	عميلنا العزيز، يؤسفنا سماع ذلك ونأمل منك التواصل معنا على الرقم 8001242225 أو من خلال البريد الإلكتروني info@riyadbank.com و تزويدنا بملاحظاتك لنتمكن من خدمتك بشكل أفضل.	##########	2	ar	us		1	ar	hope development program application frequently hang ask gps location specify kindly request solution quickly possible sake customer service satisfaction	Neutral	0	1	1
Google Play Store	1d09d875-b07b-4900-aeee-bbc12eff5d7e	Excellent, but it has been lagging recently.	Smo Khaled	##########	عميلنا العزيز، نأمل منك التواصل معنا على الرقم 8001242225 أو من خلال البريد الإلكتروني info@riyadbank.com و تزويدنا بملاحظاتك لنتمكن من خدمتك بشكل أفضل.	##########	0	ar	us		4	ar	excellent lag recently	Negative	1	0	0
Google Play Store	911f858f-fcf9-47d7-99cd-bb27126ab62b	All problems in the conversion.	علي التاجر	##########	عميلنا العزيز، يؤسفنا سماع ذلك ونأمل منك التواصل معنا على الرقم 8001242225 أو من خلال البريد الإلكتروني info@riyadbank.com و تزويدنا بملاحظاتك لنتمكن من خدمتك بشكل أفضل.	##########	1	ar	us		1	ar	problems conversion	Negative	0	1	0
Google Play Store	506f2700-4caf-4e2d-b6c8-2ea923584ec0	Wonderful application.	Wrt Wrt	##########			0	ar	us		5	ar	wonderful application	Positive	0	0	0
Google Play Store	0d07369e-4f75-4e11-8bb3-0d0d104b506f	The transfer field is faulty and adding a beneficiary is not working.	sam ksa	##########	عميلنا العزيز، يؤسفنا سماع ذلك ونأمل منك التواصل معنا على الرقم 8001242225 أو من خلال البريد الإلكتروني info@riyadbank.com و تزويدنا بملاحظاتك لنتمكن من خدمتك بشكل أفضل.	##########	0	ar	us		1	ar	transfer field faulty add beneficiary work	Negative	1	1	0
Google Play Store	e3247a61-84a0-4955-af60-24bd9d1e4702	Excellent! 👍	حسين شعبي (فخخخ؟)	##########			0	ar	us		5	ar	excellent	Positive	0	0	0
Google Play Store	67f4b81a-dbb8-40e3-905c-d7cad6759e92	The application is very important. Every time it is opened, a password is required. It cannot be opened by someone else, and there is no option to update residency data.	Mohamed Mhmoud	##########	عميلنا العزيز، يؤسفنا سماع ذلك ونأمل منك التواصل معنا على الرقم 8001242225 أو من خلال البريد الإلكتروني info@riyadbank.com و تزويدنا بملاحظاتك لنتمكن من خدمتك بشكل أفضل.	##########	1	ar	us		1	ar	application important every time open password require open someone else option update residency data	Neutral	0	1	0
Google Play Store	bbda9ef5-2afd-42af-805d-e2709188bebe	bad	REMAS Remas	##########	عميلنا العزيز، يؤسفنا سماع ذلك ونأمل منك التواصل معنا على الرقم 8001242225 أو من خلال البريد الإلكتروني info@riyadbank.com و تزويدنا بملاحظاتك لنتمكن من خدمتك بشكل أفضل.	##########	1	ar	us		1	ar	bad	Negative	1	0	0
Google Play Store	2b8bb5a0-d4df-47c6-9c54-cfa31f1432dc	Good.	S Aj	##########			0	ar	us		2	ar	good	Positive	0	0	0
Google Play Store	9659e5ff-ecea-4fd6-8272-eb39fe38765d	CC application	محمد المطيري	##########	عميلنا العزيز، يؤسفنا سماع ذلك ونأمل منك التواصل معنا على الرقم 8001242225 أو من خلال البريد الإلكتروني info@riyadbank.com و تزويدنا بملاحظاتك لنتمكن من خدمتك بشكل أفضل.	##########	0	ar	us		1	ar	cc application	Neutral	0	1	0
Google Play Store	f9ea7128-41d4-41d6-af87-fb65ebd98d10	Something very beautiful.	Shaheen Alshaheen	##########			0	ar	us		4	ar	something beautiful	Positive	1	0	0
Google Play Store	c737dccd-cf1b-402b-a994-e9666c79651b	The application refuses to log in after the new update, it is very bad.	سينووو ادريس	##########	عميلنا العزيز، يؤسفنا سماع ذلك ونأمل منك التواصل معنا على الرقم 8001242225 أو من خلال البريد الإلكتروني info@riyadbank.com و تزويدنا بملاحظاتك لنتمكن من خدمتك بشكل أفضل.	##########	1	ar	us		1	ar	application refuse log new update bad	Negative	1	1	0
Google Play Store	d1d22322-6825-4436-b9f4-a0b08c446fe8	Unfortunately, the application is very bad in all services. I have to log in and change the password every time. Most of the services in the application do not work, and I receive a notification saying that there are network problems, even though I don't have any issues. I kindly request that you develop the application and solve all the technical problems in it. Unfortunately, these problems hav…	MOHAMMED BESHAWERI	##########	عميلنا العزيز، يؤسفنا سماع ذلك ونأمل منك التواصل معنا على الرقم 8001242225 أو من خلال البريد الإلكتروني info@riyadbank.com و تزويدنا بملاحظاتك لنتمكن من خدمتك بشكل أفضل.	##########	72	ar	us		1	ar	unfortunately application bad service log change password every time service application work receive notification say network problems even though dont issue kindly request develop application solve technical problems unfortunately problems persist long time resolve yet application update properly serve customers good	Negative	1	1	0
Google Play Store	5e1e0a31-8187-47fa-a69d-c62de9ab665f	Thank you.	سليمان الحوشان	##########			0	ar	us		5	ar	thank	Positive	0	0	0
Google Play Store	be34693c-ff42-4cd1-96e7-a8a60133669e	Very good	فايز ي	##########	عميلنا العزيز، يؤسفنا سماع ذلك ونأمل منك التواصل معنا على الرقم 8001242225 أو من خلال البريد الإلكتروني info@riyadbank.com و تزويدنا بملاحظاتك لنتمكن من خدمتك بشكل أفضل.	##########	0	ar	us		1	ar	good	Positive	0	0	0
Google Play Store	fd4a44a9-c2cc-4e77-baa9-dac2cb4759c0	"I am outside of Saudi Arabia and the program is not opening. I have to reset the data and when I do, it calls me to give me a message. I don't have the ability to receive calls, why doesn't it send a message instead of getting stuck like this? I only receive messages, it's frustrating. Please help me solve this problem now, please."	Om Omer	##########	عميلنا العزيز، نأمل منك التواصل معنا على الرقم 8001242225 أو من خلال البريد الإلكتروني info@riyadbank.com و تزويدنا بملاحظاتك لنتمكن من خدمتك بشكل أفضل.	##########	0	ar	us		2	ar	outside saudi arabia program open reset data call give message dont ability receive call doesnt send message instead get stick like receive message frustrate please help solve problem please	Negative	1	1	1
Google Play Store	6b793a68-4ecf-4afe-8185-85696f37f6d3	Excellent	علي ماطر الحمدي	##########			0	ar	us		5	ar	excellent	Positive	0	0	0
Google Play Store	292c224b-6418-47fd-af88-62c6f8f61228	It's amazing/awesome.	Mhmad Aa	##########			0	ar	us		1	ar	amazingawesome	Positive	0	0	0
Google Play Store	9f190f3c-a684-4a5c-ac77-30322e86a4c5	Honestly, the application has become very bad, it asks for a lot of codes and passwords. I request that it be modified to be like the Al-Rajhi application, smooth and simple, and only opens with fingerprint.	السلطان أبو أمير	##########	عميلنا العزيز، يؤسفنا سماع ذلك ونأمل منك التواصل معنا على الرقم 8001242225 أو من خلال البريد الإلكتروني info@riyadbank.com و تزويدنا بملاحظاتك لنتمكن من خدمتك بشكل أفضل.	##########	6	ar	us		1	ar	honestly application become bad ask lot cod passwords request modify like alrajhi application smooth simple open fingerprint	Negative	1	1	0
Google Play Store	c543d682-f9f6-4aa2-8d13-1ae23276fba6	Very wonderful	مفاآرق احبآابة	##########			0	ar	us		5	ar	wonderful	Positive	0	0	0
Google Play Store	4f5a14fc-27b5-492d-aef8-7d125b72c9b3	Good.	عامر الغامدي	##########			0	ar	us		4	ar	good	Positive	0	0	0
Google Play Store	5a97a23d-3ba9-4029-b12c-abc7f4a0659f	Very beautiful	ناصر حسين عمر	##########			0	ar	us		5	ar	beautiful	Positive	0	0	0
Google Play Store	d1dff7bb-ba71-47bb-b6cd-93f5b04fc105	Very beautiful.	ابو راشد	##########			0	ar	us		5	ar	beautiful	Positive	0	0	0
Google Play Store	41a0c17e-259f-43bb-88dc-b70a03a1bc9b	The website forcefully demands this stupid program.	لا إله إلا اللّٰه سبحان اللّٰه الحمد للّٰه	##########	عميلنا العزيز، نأمل منك التواصل معنا على الرقم 8001242225 أو من خلال البريد الإلكتروني info@riyadbank.com و تزويدنا بملاحظاتك لنتمكن من خدمتك بشكل أفضل.	##########	0	ar	us		1	ar	website forcefully demand stupid program	Negative	1	0	0
Google Play Store	f2bbb7b7-16e5-4e0d-a4de-34634680a0cb	Awesome	فايز الشمري	##########			0	ar	us		3	ar	awesome	Positive	0	0	0
Google Play Store	fa5616b9-fa40-472d-a083-cfe9696582cd	The application is very bad after the latest update.... The authentication message does not arrive until after the specified deadline... And the password is not accepted even though it is definitely correct and I always enter it correctly... I am currently unable to use the application due to this poor performance. Please fix the problem.	حوراء الكاظم	##########	عميلنا العزيز، يؤسفنا سماع ذلك ونأمل منك التواصل معنا على الرقم 8001242225 أو من خلال البريد الإلكتروني info@riyadbank.com و تزويدنا بملاحظاتك لنتمكن من خدمتك بشكل أفضل.	##########	152	ar	us		1	ar	application bad late update authentication message arrive specify deadline password accept even though definitely correct always enter correctly currently unable use application due poor performance please fix problem	Negative	1	1	0
Google Play Store	910b9afe-282b-480b-8fdb-280ed0e187ba	A lavish bank with sophisticated employees and deserving customers. Thank you, Riyad Bank! 🎉🌹	Abo Wjdan	2023-06-08 00:25:00			1	ar	us		5	ar	lavish bank sophisticate employees deserve customers thank riyad bank	Positive	0	0	0
Google Play Store	f17d9826-9ec7-4583-a3e2-b6ad33451f47	The application is very good.	kالدببه الثلاثه	##########			0	ar	us		5	ar	application good	Positive	0	0	0
Google Play Store	99d004ef-5ae0-4fa2-8839-c877c74a4ea7	I request support for fingerprint login directly instead of entering the secret code.	محمد Raiq	##########	عميلنا العزيز، نأمل منك التواصل معنا على الرقم 8001242225 أو من خلال البريد الإلكتروني info@riyadbank.com و تزويدنا بملاحظاتك لنتمكن من خدمتك بشكل أفضل.	##########	0	ar	us		3	ar	request support fingerprint login directly instead enter secret code	Neutral	0	1	0
Google Play Store	31c2008d-3657-4771-97ec-ad516ccf0e22	Good	علي طاهر	##########			0	ar	us		5	ar	good	Positive	0	0	0
Google Play Store	f788ae6b-9352-41f5-8244-2b2aefaf55bc	Excellent experience	حسين ع	##########			0	ar	us		5	ar	excellent experience	Positive	0	0	0
Google Play Store	38859629-9685-4b9e-8e89-b92a643252e9	The application is no longer capable of producing a PDF version from any conversion process.	temoo tamam	##########	عميلنا العزيز، يؤسفنا سماع ذلك ونأمل منك التواصل معنا على الرقم 8001242225 أو من خلال البريد الإلكتروني info@riyadbank.com و تزويدنا بملاحظاتك لنتمكن من خدمتك بشكل أفضل.	##########	1	ar	us		3	ar	application long capable produce pdf version conversion process	Negative	0	1	0
Google Play Store	515b5c09-97db-4288-8f62-4f536863fb0f	The application keeps me busy, the website is occupied, and Monib is available.	ام فهد	##########	عميلنا العزيز، نأمل منك التواصل معنا على الرقم 8001242225 أو من خلال البريد الإلكتروني info@riyadbank.com و تزويدنا بملاحظاتك لنتمكن من خدمتك بشكل أفضل.	##########	0	ar	us		1	ar	application keep busy website occupy monib available	Negative	0	1	0
Google Play Store	3064e8f5-975d-45d1-98aa-da76a982979c	Greatness ꧁ ♡ ꧂	حمودي حموودي	##########			0	ar	us		5	ar	greatness	Positive	0	0	0
Google Play Store	cacf4325-8dad-4d23-a6ea-649354baf732	The worst in the kingdom 👎👎👎👎👎	ايمن بخيت (ابو ايلاف)	2023-06-07 01:50:00	عميلنا العزيز، يؤسفنا سماع ذلك ونأمل منك التواصل معنا على الرقم 8001242225 أو من خلال البريد الإلكتروني info@riyadbank.com و تزويدنا بملاحظاتك لنتمكن من خدمتك بشكل أفضل.	##########	0	ar	us		1	ar	bad kingdom	Negative	1	0	0
Google Play Store	f246a564-0e69-4c3b-acb1-4b1547993118	I swear to Allah, I am tired of dealing with the password.	يحيى اسماعيل	2023-06-07 00:09:00	عميلنا العزيز، نأمل منك التواصل معنا على الرقم 8001242225 أو من خلال البريد الإلكتروني info@riyadbank.com و تزويدنا بملاحظاتك لنتمكن من خدمتك بشكل أفضل.	##########	0	ar	us		5	ar	swear allah tire deal password	Negative	1	0	0
Google Play Store	fba3e5d9-ea33-4c9d-ba2e-ba204ca6a8e5	Very, very, very bad application. It doesn't work. When I enter, it says error in username or password. I hope the problem is resolved.	ابتسام الحارثي	##########	عميلنا العزيز، يؤسفنا سماع ذلك ونأمل منك التواصل معنا على الرقم 8001242225 أو من خلال البريد الإلكتروني info@riyadbank.com و تزويدنا بملاحظاتك لنتمكن من خدمتك بشكل أفضل.	##########	13	ar	us		1	ar	bad application doesnt work enter say error username password hope problem resolve	Negative	1	1	0
Google Play Store	2aa3089c-e7dc-417e-ab8a-a9bf8e48b95f	Very bad, to the extreme. It's better to enter the correct ID number and it shows an error. We enter the mobile number and it's the same error. What is the solution with your the worst application? We are fed up with repeating it a million times.	نوره العتيبي	##########	عميلنا العزيز، يؤسفنا سماع ذلك ونأمل منك التواصل معنا على الرقم 8001242225 أو من خلال البريد الإلكتروني info@riyadbank.com و تزويدنا بملاحظاتك لنتمكن من خدمتك بشكل أفضل.	##########	0	ar	us		2	ar	bad extreme good enter correct id number show error enter mobile number error solution bad application feed repeat million time	Negative	1	1	0
Google Play Store	42c5951b-1ef3-4cf5-a287-a40a681ebe1a	The application is very bad.	سعيد القرني	##########	عميلنا العزيز، يؤسفنا سماع ذلك ونأمل منك التواصل معنا على الرقم 8001242225 أو من خلال البريد الإلكتروني info@riyadbank.com و تزويدنا بملاحظاتك لنتمكن من خدمتك بشكل أفضل.	##########	0	ar	us		1	ar	application bad	Negative	1	0	0
Google Play Store	d081996f-0d3d-4ef1-a3a7-2839f991d671	The latest update is very bad, you cannot access the application ❌❌❌❌	محمد اليافعي	##########	عميلنا العزيز، يؤسفنا سماع ذلك ونأمل منك التواصل معنا على الرقم 8001242225 أو من خلال البريد الإلكتروني info@riyadbank.com و تزويدنا بملاحظاتك لنتمكن من خدمتك بشكل أفضل.	##########	2	ar	us		1	ar	late update bad access application	Negative	1	1	0
Google Play Store	db61b941-d77d-45b3-a240-76d0b7405dca	The latest update is bad with location tracking.	Yuosef Saleh	##########	عميلنا العزيز، يؤسفنا سماع ذلك ونأمل منك التواصل معنا على الرقم 8001242225 أو من خلال البريد الإلكتروني info@riyadbank.com و تزويدنا بملاحظاتك لنتمكن من خدمتك بشكل أفضل.	##########	0	ar	us		1	ar	late update bad location track	Negative	1	0	0
Google Play Store	ea5ab412-c206-44e3-9874-3c0233178a41	Good.	Abdulazem Alsabry	##########			0	ar	us		4	ar	good	Positive	0	0	0
Google Play Store	a038ccc6-704e-4611-b9dd-c5cb0a4d0000	The data entry is rejected, it says enter the correct data.	بسام احمد	##########	عميلنا العزيز، نأمل منك التواصل معنا على الرقم 8001242225 أو من خلال البريد الإلكتروني info@riyadbank.com و تزويدنا بملاحظاتك لنتمكن من خدمتك بشكل أفضل.	##########	0	ar	us		2	ar	data entry reject say enter correct data	Negative	0	1	0
Google Play Store	f01d217d-8db7-47d1-ae05-a44b31668f76	Very bad and does not open easily at all, not even worth a single star 👎🏻	سبحان الله وبحمده سبحان الله العظيم	2023-06-06 03:17:00	عميلنا العزيز، يؤسفنا سماع ذلك ونأمل منك التواصل معنا على الرقم 8001242225 أو من خلال البريد الإلكتروني info@riyadbank.com و تزويدنا بملاحظاتك لنتمكن من خدمتك بشكل أفضل.	##########	0	ar	us		1	ar	bad open easily even worth single star	Negative	1	0	0
Google Play Store	74fe3958-d3c4-4fa6-8a31-18b4c4f95e83	The application will not work.	رمضان حنتول	##########	عميلنا العزيز، يؤسفنا سماع ذلك ونأمل منك التواصل معنا على الرقم 8001242225 أو من خلال البريد الإلكتروني info@riyadbank.com و تزويدنا بملاحظاتك لنتمكن من خدمتك بشكل أفضل.	##########	0	ar	us		1	ar	application work	Negative	0	1	0
Google Play Store	2d87781e-f82a-4907-8831-3e0c54f3b618	CJadan Bank is currently operating.	Tesv Mobile	##########	عميلنا العزيز، نأسف لسماع ذلك ونأمل منك تزويدنا بالملاحظة التي تواجهك عبر البريد الإلكتروني info@riyadbank.com أو يمكنك التواصل معنا على الرقم 8001242225 لنتمكن من خدمتك.	##########	0	ar	us		1	ar	cjadan bank currently operate	Neutral	0	1	0
Google Play Store	400e8de4-e61a-48c6-ad51-8ef20a8f61fe	After the recent updates, the application is very, very, very bad. It doesn't deserve any stars at all.	محمد حلواني حلولني	##########	عميلنا العزيز، نأسف لسماع ذلك ونأمل منك تزويدنا بالملاحظة التي تواجهك عبر البريد الإلكتروني info@riyadbank.com أو يمكنك التواصل معنا على الرقم 8001242225 لنتمكن من خدمتك.	##########	0	ar	us		1	ar	recent update application bad doesnt deserve star	Negative	1	0	0
Google Play Store	15cea779-fec3-46d4-8038-ec234efc1351	A very bad application, when entering the code it gives a wrong response, even if the code is corrected it still doesn't accept it.	بواياد اياد	##########	عميلنا العزيز، نأسف لسماع ذلك ونأمل منك تزويدنا بالملاحظة التي تواجهك عبر البريد الإلكتروني info@riyadbank.com أو يمكنك التواصل معنا على الرقم 8001242225 لنتمكن من خدمتك.	##########	0	ar	us		1	ar	bad application enter code give wrong response even code correct still doesnt accept	Negative	1	1	0
Google Play Store	9feb128c-f2fd-4e30-af9f-ede5f8eead45	Honestly, outstanding services and quick account opening, but there is a very simple problem when I try to log in to my account through the app. It seems that there is an error. Why? ♥️🥰	Stopzozo0	##########	عميلنا العزيز، نأمل منك تزويدنا بالملاحظة التي تواجهك عبر البريد الإلكتروني info@riyadbank.com أو يمكنك التواصل معنا على الرقم 8001242225 لنتمكن من خدمتك.	##########	1	ar	us		5	ar	honestly outstanding service quick account open simple problem try log account app seem error	Negative	1	1	0
Google Play Store	7e09253c-448e-4bb6-bcc6-ac702899a273	I swear by Allah, some application sections are complex and unclear, and it's forbidden. There's a star, you guys should learn from Alinma Bank, Go beyond and surpass it, and also from Al Rajhi Bank.	عبدالرحمن الامير	##########	عميلنا العزيز، نأسف لسماع ذلك ونأمل منك تزويدنا بالملاحظة التي تواجهك عبر البريد الإلكتروني info@riyadbank.com أو يمكنك التواصل معنا على الرقم 8001242225 لنتمكن من خدمتك.	##########	0	ar	us		1	ar	swear allah application section complex unclear forbid theres star guy learn alinma bank go beyond surpass also al rajhi bank	Negative	1	0	0
Google Play Store	09de968a-f6e4-4adf-b83e-2813c7747732	My experience with Bank Al-Riyadh in Saudi Arabia is very disappointing, their services are extremely poor.	ماجد العتيبي	##########	عميلنا العزيز، نأسف لسماع ذلك ونأمل منك تزويدنا بالملاحظة التي تواجهك عبر البريد الإلكتروني info@riyadbank.com أو يمكنك التواصل معنا على الرقم 8001242225 لنتمكن من خدمتك.	##########	0	ar	us		1	ar	experience bank alriyadh saudi arabia disappoint service extremely poor	Negative	1	0	0
Google Play Store	81337fd2-812e-4f28-9ac9-56db8ffa8bf7	Since yesterday, it hasn't been opening for me. I hope you can help find a solution.	نجاوي الشريف	2023-06-05 04:41:00	عميلنا العزيز، نأسف لسماع ذلك ونأمل منك تزويدنا بالملاحظة التي تواجهك عبر البريد الإلكتروني info@riyadbank.com أو يمكنك التواصل معنا على الرقم 8001242225 لنتمكن من خدمتك.	2023-06-08 07:38:00	0	ar	us		1	ar	since yesterday hasnt open hope help find solution	Negative	0	1	0
Google Play Store	7d4c681e-fd7e-4d3f-9d9f-e7c3db022b70	Very impractical, every time I have to enter the password and verification message, sometimes it crashes and doesn't let me log in or change my password.	Ahmed	2023-06-05 04:02:00	عميلنا العزيز، يؤسفنا سماع ذلك ونأمل منك التواصل معنا على الرقم 8001242225 أو من خلال البريد الإلكتروني info@riyadbank.com و تزويدنا بملاحظاتك لنتمكن من خدمتك بشكل أفضل.	##########	0	ar	us		2	ar	impractical every time enter password verification message sometimes crash doesnt let log change password	Negative	1	1	1
Google Play Store	f10ad458-6482-4fa6-9417-c68f80f66b31	The application on the third day is completely worthless without any reason, it is extremely bad, one of the worst banking applications unfortunately. We hope that this issue is addressed.	Gamal Salama	##########	عميلنا العزيز، نأسف لسماع ذلك ونأمل منك تزويدنا بالملاحظة التي تواجهك عبر البريد الإلكتروني info@riyadbank.com أو يمكنك التواصل معنا على الرقم 8001242225 لنتمكن من خدمتك.	2023-06-08 07:38:00	0	ar	us		1	ar	application third day completely worthless without reason extremely bad one bad bank applications unfortunately hope issue address	Negative	1	1	0
Google Play Store	ccbff4b3-c71d-4521-9a80-904ff60005b6	By God, the service is terrible, just like their faces. We can't transfer our money and call them. Each one of them is wasting your time. The solution is to cancel the account and open an account in another bank.	Nasser 123	##########	عميلنا العزيز، يؤسفنا سماع ذلك ونأمل منك التواصل معنا على الرقم 8001242225 أو من خلال البريد الإلكتروني info@riyadbank.com و تزويدنا بملاحظاتك لنتمكن من خدمتك بشكل أفضل.	##########	0	ar	us		1	ar	god service terrible like face cant transfer money call one waste time solution cancel account open account another bank	Negative	1	1	0
Google Play Store	c64d4d3a-7347-4c8e-8e0e-e4d3c28feec6	"The star for app feedback is a the worst in every sense of the word. It's 2022, when will you people evolve? Humans have reached Mars and you can't even get your app to work. Not only does it not open, but it also asks for a password change and doesn't accept the ID number. When will you learn? I will cancel my subscription tomorrow."	hasson alhamed	##########	عميلنا العزيز، نأسف لسماع ذلك ونأمل منك تزويدنا بالملاحظة التي تواجهك عبر البريد الإلكتروني info@riyadbank.com أو يمكنك التواصل معنا على الرقم 8001242225 لنتمكن من خدمتك.	##########	0	ar	us		2	ar	star app feedback bad every sense word people evolve humans reach mar cant even get app work open also ask password change doesnt accept id number learn cancel subscription tomorrow	Negative	1	1	0
Google Play Store	295d5198-fcb1-493a-8d48-7b6b04a02a2c	weak	هدى تاج السر	##########	عميلنا العزيز، يؤسفنا سماع ذلك ونأمل منك التواصل معنا على الرقم 8001242225 أو من خلال البريد الإلكتروني info@riyadbank.com و تزويدنا بملاحظاتك لنتمكن من خدمتك بشكل أفضل.	##########	0	ar	us		1	ar	weak	Negative	1	0	0
Google Play Store	09dfa254-d439-494e-9dab-1f4c147a504f	The translation of "اخيس تطبيق" from Arabic to English is "Worst application."	Ahmed Mohamed	2023-06-04 09:08:00	عميلنا العزيز، يؤسفنا سماع ذلك ونأمل منك التواصل معنا على الرقم 8001242225 أو من خلال البريد الإلكتروني info@riyadbank.com و تزويدنا بملاحظاتك لنتمكن من خدمتك بشكل أفضل.	##########	0	ar	us		1	ar	translation arabic english bad application	Negative	1	0	0
Google Play Store	4d975655-dd6d-4603-92e4-60a7f6ef25f0	Very very very bad application	سعيد عبد القوي	2023-06-04 07:40:00	عميلنا العزيز، يؤسفنا سماع ذلك ونأمل منك التواصل معنا على الرقم 8001242225 أو من خلال البريد الإلكتروني info@riyadbank.com و تزويدنا بملاحظاتك لنتمكن من خدمتك بشكل أفضل.	##########	0	ar	us		1	ar	bad application	Negative	1	0	0
Google Play Store	6f9fbbf7-fe9f-4611-9d6b-85d2e708f4ff	Excellent	اسيا عمر	2023-06-03 03:42:00			0	ar	us		5	ar	excellent	Positive	0	0	0
Google Play Store	71236257-0ca8-4250-800f-02afa72cd587	The application is very slow and bad after the latest update. The authentication code takes a long time to come after the specified time, and sometimes it comes after a long period, approximately half an hour or more, after exiting the application.	صلاح سلكشن	2023-06-02 08:48:00	عميلنا العزيز، يؤسفنا سماع ذلك ونأمل منك التواصل معنا على الرقم 8001242225 أو من خلال البريد الإلكتروني info@riyadbank.com و تزويدنا بملاحظاتك لنتمكن من خدمتك بشكل أفضل.	2023-06-04 04:02:00	73	ar	us		2	ar	application slow bad late update authentication code take long time come specify time sometimes come long period approximately half hour exit application	Negative	1	0	1
Google Play Store	2334c7dd-d66a-4f8a-a2fc-04f9539d9570	Mamaz	Qayes Kalad	2023-06-02 04:28:00			0	ar	us		5	ar	mamaz	Neutral	0	0	0
Google Play Store	30b1ca6b-a31c-430a-afe7-88374ddb3283	Very, very, very bad. Private login messages are not being received, and private transfer messages are not being received.	اسامه حميد الحلياني	##########	عميلنا العزيز، يؤسفنا سماع ذلك ونأمل منك التواصل معنا على الرقم 8001242225 أو من خلال البريد الإلكتروني info@riyadbank.com و تزويدنا بملاحظاتك لنتمكن من خدمتك بشكل أفضل.	2023-06-04 04:02:00	3	ar	us		1	ar	bad private login message receive private transfer message receive	Negative	1	1	0
Google Play Store	9835b7ee-5c14-46b1-8456-0cfdd97eef34	Good	فواز موسى	##########			0	ar	us		5	ar	good	Positive	0	0	0
Google Play Store	448ebe36-99b7-45c6-b29e-a5876ba5ee7b	The most beautiful program	ربيع احمد عثمان مزاحم	##########			0	ar	us		4	ar	beautiful program	Positive	1	0	0
Google Play Store	a21a6cbf-e7ea-482e-a81c-8bc2e6cc1f78	The application has become very bad.	Hesham Hagag	##########	عميلنا العزيز، يؤسفنا سماع ذلك ونأمل منك التواصل معنا على الرقم 8001242225 أو من خلال البريد الإلكتروني info@riyadbank.com و تزويدنا بملاحظاتك لنتمكن من خدمتك بشكل أفضل.	2023-06-04 04:01:00	0	ar	us		1	ar	application become bad	Negative	1	0	0
Google Play Store	95fe7d53-bc12-47c1-a798-3a8f44db15cc	The latest update is bad.	عمار محمد ارصد	##########	عميلنا العزيز، نأسف لسماع ذلك ونأمل منك تزويدنا بالملاحظة التي تواجهك عبر البريد الإلكتروني info@riyadbank.com أو يمكنك التواصل معنا على الرقم 8001242225 لنتمكن من خدمتك.	2023-06-01 03:19:00	0	ar	us		3	ar	late update bad	Negative	1	0	0
Google Play Store	a6ae4443-f2b2-43de-9836-16236387cd92	Failure.. I wish we had returned safely from our journey.	Aziz Nasser	##########	عميلنا العزيز، يؤسفنا سماع ذلك ونأمل منك التواصل معنا على الرقم 8001242225 أو من خلال البريد الإلكتروني info@riyadbank.com و تزويدنا بملاحظاتك لنتمكن من خدمتك بشكل أفضل.	2023-06-01 03:18:00	0	ar	us		1	ar	failure wish return safely journey	Negative	1	1	0
Google Play Store	818bb7aa-3df3-48f8-a468-b47aac10059e	Why was a cumulative limit set for daily transfers?????!!!!!!!	khaled go	##########	عميلنا العزيز، نأمل منك التواصل معنا على الرقم 8001242225 أو من خلال البريد الإلكتروني info@riyadbank.com و تزويدنا بملاحظاتك لنتمكن من خدمتك بشكل أفضل.	2023-06-01 03:18:00	0	ar	us		1	ar	cumulative limit set daily transfer	Negative	1	0	1
Google Play Store	04681415-cf62-491d-acf9-96cb614f72a8	The worst bank in the kingdom.	marwan sawadi	##########	عميلنا العزيز، يؤسفنا سماع ذلك ونأمل منك التواصل معنا على الرقم 8001242225 أو من خلال البريد الإلكتروني info@riyadbank.com و تزويدنا بملاحظاتك لنتمكن من خدمتك بشكل أفضل.	2023-06-01 03:18:00	0	ar	us		1	ar	bad bank kingdom	Negative	1	0	0
Google Play Store	bb70737b-5a9e-46f2-bafa-9082c64cc19e	After the latest update, the program has become better.	زينب الزاير	##########	عميلنا العزيز، يؤسفنا سماع ذلك ونأمل منك التواصل معنا على الرقم 8001242225 أو من خلال البريد الإلكتروني info@riyadbank.com و تزويدنا بملاحظاتك لنتمكن من خدمتك بشكل أفضل.	##########	0	ar	us		4	ar	late update program become good	Positive	1	0	0
Google Play Store	9eea0ba5-24f3-4ca9-b2ac-77caea5b3461	bad	Abdo Saitra Abdo Mohammed	##########	عميلنا العزيز، يؤسفنا سماع ذلك ونأمل منك التواصل معنا على الرقم 8001242225 أو من خلال البريد الإلكتروني info@riyadbank.com و تزويدنا بملاحظاتك لنتمكن من خدمتك بشكل أفضل.	2023-06-01 03:17:00	0	ar	us		5	ar	bad	Negative	1	0	0
Google Play Store	d5d6e4a2-bc46-4679-8111-b45d2258736f	Very bad, when I log in it shows that the client is suspended while the account is active with you... What is this electronic mess?! Al Rajhi is better, and the best is even better than the best.	ابو عادل	##########	عميلنا العزيز، يؤسفنا سماع ذلك ونأمل منك التواصل معنا على الرقم 8001242225 أو من خلال البريد الإلكتروني info@riyadbank.com و تزويدنا بملاحظاتك لنتمكن من خدمتك بشكل أفضل.	2023-06-01 03:17:00	0	ar	us		1	ar	bad log show client suspend account active electronic mess al rajhi good best even good best	Negative	1	1	0
Google Play Store	a6a2d318-25eb-41c6-9f9b-4365c8f4975a	Al-Riyadh Bank is not excellent.	عبدالله الحسين	##########	عميلنا العزيز، يؤسفنا سماع ذلك ونأمل منك التواصل معنا على الرقم 8001242225 أو من خلال البريد الإلكتروني info@riyadbank.com و تزويدنا بملاحظاتك لنتمكن من خدمتك بشكل أفضل.	2023-06-01 03:17:00	0	ar	us		1	ar	alriyadh bank excellent	Negative	0	0	0
Google Play Store	7213440f-c55d-416b-8c20-f32b18689866	Peace be upon you. My mobile phone is not working properly and I have trust issues with it. The program is not allowing me to access the transfer feature and I have a problem with it.	Yasser Emam	##########	وعليكم السلام عميلنا العزيز، نأمل منك التواصل معنا على الرقم 8001242225 أو من خلال البريد الإلكتروني info@riyadbank.com و تزويدنا بملاحظاتك لنتمكن من خدمتك بشكل أفضل.	2023-06-01 03:16:00	0	ar	us		1	ar	peace upon mobile phone work properly trust issue program allow access transfer feature problem	Negative	0	1	0
Google Play Store	506d23ee-49d0-468c-a0c9-c6b175e467e5	The worst program, the Riyadh Bank program, is a very bad program.	ساره العتيق	##########	عميلنا العزيز، يؤسفنا سماع ذلك ونأمل منك التواصل معنا على الرقم 8001242225 أو من خلال البريد الإلكتروني info@riyadbank.com و تزويدنا بملاحظاتك لنتمكن من خدمتك بشكل أفضل.	2023-06-01 03:07:00	0	ar	us		1	ar	bad program riyadh bank program bad program	Negative	1	0	0
Google Play Store	f6e3e846-3170-4c86-ad14-d47b19826912	Cannot enter due to a very annoying message requesting the closure of something that does not exist in my device, which is VPN.	ابو مازن	##########	عميلنا العزيز، نأسف لسماع ذلك ونأمل منك تزويدنا بالملاحظة التي تواجهك عبر البريد الإلكتروني info@riyadbank.com أو يمكنك التواصل معنا على الرقم 8001242225 لنتمكن من خدمتك.	2023-06-01 03:07:00	3	ar	us		1	ar	enter due annoy message request closure something exist device vpn	Negative	1	0	0
Google Play Store	d4a08ce7-1aec-40dd-99d5-89243f246e88	"Terrible" or "awful"	نواف	##########	عميلنا العزيز، يؤسفنا سماع ذلك ونأمل منك التواصل معنا على الرقم 8001242225 أو من خلال البريد الإلكتروني info@riyadbank.com و تزويدنا بملاحظاتك لنتمكن من خدمتك بشكل أفضل.	2023-06-01 03:07:00	0	ar	us		1	ar	terrible awful	Negative	1	0	0
Google Play Store	cdf8871a-0aeb-4f10-b3dd-32a1f0bf953d	Very good.	احمد احمد	##########	عميلنا العزيز، يؤسفنا سماع ذلك ونأمل منك التواصل معنا على الرقم 8001242225 أو من خلال البريد الإلكتروني info@riyadbank.com و تزويدنا بملاحظاتك لنتمكن من خدمتك بشكل أفضل.	2023-06-01 03:07:00	0	ar	us		1	ar	good	Positive	0	0	0
Google Play Store	7af10d07-c7b1-40ea-8366-9b24450a69cd	The new update is very bad.	علي علي	##########	عميلنا العزيز، نأسف لسماع ذلك ونأمل منك تزويدنا بالملاحظة التي تواجهك عبر البريد الإلكتروني info@riyadbank.com أو يمكنك التواصل معنا على الرقم 8001242225 لنتمكن من خدمتك.	2023-06-01 03:06:00	0	ar	us		5	ar	new update bad	Negative	1	0	0
Google Play Store	dbc43d67-0a9c-4feb-b5b4-d2f9c159c396	The application does not open unless the location is activated. Why??? A question I couldn't find an answer to. Make it easy and do not make it difficult, and do not repel. Many stars, but they are mandatory.	غريب الدار	##########	عميلنا العزيز، نأسف لسماع ذلك ونأمل منك تزويدنا بالملاحظة التي تواجهك عبر البريد الإلكتروني info@riyadbank.com أو يمكنك التواصل معنا على الرقم 8001242225 لنتمكن من خدمتك.	2023-06-01 03:06:00	0	ar	us		1	ar	application open unless location activate question couldnt find answer make easy make difficult repel many star mandatory	Negative	1	1	0
Google Play Store	e6f2743f-84f7-48eb-928b-75225def7496	Excellent	eayashah	##########			0	ar	us		5	ar	excellent	Positive	0	0	0
Google Play Store	68a81d17-9da6-4d58-8e11-6dd80c301984	Unfortunately, the application no longer supports downloading files when issuing the IBAN certificate or downloading any PDF conversion. It also does not support download even through sharing. It is necessary to update to the latest Android system. When contacting the bank, they tell you to use Riyad Online. The application needs to be updated by the bank to keep up with technological advancement…	Fahad m	##########	عميلنا العزيز، نأسف لسماع ذلك ونأمل منك تزويدنا بالملاحظة التي تواجهك عبر البريد الإلكتروني info@riyadbank.com أو يمكنك التواصل معنا على الرقم 8001242225 لنتمكن من خدمتك.	2023-06-01 03:06:00	0	ar	us		1	ar	unfortunately application long support download file issue iban certificate download pdf conversion also support download even share necessary update late android system contact bank tell use riyad online application need update bank keep technological advancements	Negative	0	1	0
Google Play Store	ba73c334-1d0f-4dd0-98b4-5f33752bcdb8	The application is bad after the update......It is not possible to transfer through the application....The transfer icon is not activated.	Bader Moosa	##########	عميلنا العزيز، يؤسفنا سماع ذلك ونأمل منك التواصل معنا على الرقم 8001242225 أو من خلال البريد الإلكتروني info@riyadbank.com و تزويدنا بملاحظاتك لنتمكن من خدمتك بشكل أفضل.	2023-06-01 03:05:00	5	ar	us		1	ar	application bad updateit possible transfer applicationthe transfer icon activate	Negative	1	1	0
Google Play Store	a07f5c93-5af1-40ba-a551-d17cf6c2916e	If there is a program that is worse than any other program in the world, it's unreal. We have been waiting for years for it to improve, but unfortunately, my salary depends on them. But I swear, I wouldn't transfer to any bank except for this one 👎👎👎👎👎👎.	fahad al	##########	عميلنا العزيز، يؤسفنا سماع ذلك ونأمل منك التواصل معنا على الرقم 8001242225 أو من خلال البريد الإلكتروني info@riyadbank.com و تزويدنا بملاحظاتك لنتمكن من خدمتك بشكل أفضل.	2023-06-01 03:05:00	1	ar	us		1	ar	program bad program world unreal wait years improve unfortunately salary depend swear wouldnt transfer bank except one	Negative	1	1	0
Google Play Store	4ac5da9d-f23e-479a-98e9-4dd8ecdb36a9	What is this? I am unable to access my account despite requesting it and the website is active!!!	op200 our	##########	عميلنا العزيز، نأمل منك التواصل معنا على الرقم 8001242225 أو من خلال البريد الإلكتروني info@riyadbank.com و تزويدنا بملاحظاتك لنتمكن من خدمتك بشكل أفضل.	##########	1	ar	us		1	ar	unable access account despite request website active	Negative	0	1	0
Google Play Store	75d4aeb9-7bf8-4968-99df-5ca9366734f7	I can't log in.... The application is very, very bad. Where are the specialized programmers? Why don't the officials look into the situation of this application? Is the upper management of Bank Al-Riyadh satisfied with this failure?	محمد الهاشمي	##########	عميلنا العزيز، يؤسفنا سماع ذلك ونأمل منك التواصل معنا على الرقم 8001242225 أو من خلال البريد الإلكتروني info@riyadbank.com و تزويدنا بملاحظاتك لنتمكن من خدمتك بشكل أفضل.	##########	0	ar	us		1	ar	cant log application bad specialize programmers dont officials look situation application upper management bank alriyadh satisfy failure	Negative	1	1	0
Google Play Store	6edf871d-3f0f-4d6a-8f0c-b8273b3362de	The latest update includes hiding the password and invisible points.	شريف الدالى	##########	عميلنا العزيز، نأمل منك التواصل معنا على الرقم 8001242225 أو من خلال البريد الإلكتروني info@riyadbank.com و تزويدنا بملاحظاتك لنتمكن من خدمتك بشكل أفضل.	##########	1	ar	us		2	ar	late update include hide password invisible point	Neutral	0	1	0
Google Play Store	399f0019-0bb1-4c5a-8c3b-49dcd3e6e85c	I do not know what the problem is, the application is not working.	Ahmed Ebrahem	##########	عميلنا العزيز، نأمل منك التواصل معنا على الرقم 8001242225 أو من خلال البريد الإلكتروني info@riyadbank.com و تزويدنا بملاحظاتك لنتمكن من خدمتك بشكل أفضل.	##########	0	ar	us		1	ar	know problem application work	Negative	0	1	0
Google Play Store	8ba97795-a451-436d-909c-eac79095e72b	After the update, it became bad.	عبدالسلام الحربي	##########	عميلنا العزيز، يؤسفنا سماع ذلك ونأمل منك التواصل معنا على الرقم 8001242225 أو من خلال البريد الإلكتروني info@riyadbank.com و تزويدنا بملاحظاتك لنتمكن من خدمتك بشكل أفضل.	##########	0	ar	us		1	ar	update become bad	Negative	1	0	0
Google Play Store	7cd29d60-2384-4286-a265-667802e90456	The latest update is bad and I can't update my identity. Please fix the problem as soon as possible.	Aa Mm	##########	عميلنا العزيز، يؤسفنا سماع ذلك ونأمل منك التواصل معنا على الرقم 8001242225 أو من خلال البريد الإلكتروني info@riyadbank.com و تزويدنا بملاحظاتك لنتمكن من خدمتك بشكل أفضل.	##########	0	ar	us		1	ar	late update bad cant update identity please fix problem soon possible	Negative	1	1	0
Google Play Store	35e568c3-6105-4ad9-9a57-b76373c698de	It does not work, it does not open, and the maps page is open but it does not open.	Munee Moon	##########	عميلنا العزيز، نأمل منك التواصل معنا على الرقم 8001242225 أو من خلال البريد الإلكتروني info@riyadbank.com و تزويدنا بملاحظاتك لنتمكن من خدمتك بشكل أفضل.	##########	0	ar	us		1	ar	work open map page open open	Negative	0	1	0
Google Play Store	f8e38e06-31bd-4323-a122-a9abbb804e46	Good.	اسدبن اسد	##########			0	ar	us		5	ar	good	Positive	0	0	0
Google Play Store	f6865cda-260f-4836-be59-0e16d2e0ec10	The website will appear much better after the new modification.	امل السعدي	##########	عميلنا العزيز، يؤسفنا سماع ذلك ونأمل منك التواصل معنا على الرقم 8001242225 أو من خلال البريد الإلكتروني info@riyadbank.com و تزويدنا بملاحظاتك لنتمكن من خدمتك بشكل أفضل.	##########	0	ar	us		1	ar	website appear much good new modification	Positive	1	1	0
Google Play Store	f8ccc3f4-d952-450a-8608-eb0222f57c52	The application is bad after the update and I cannot update the identification. I tried deleting it and reinstalling it, but it was useless.	amr abdelftah	##########	عميلنا العزيز، نأسف لسماع ذلك ونأمل منك تزويدنا بالملاحظة التي تواجهك عبر البريد الإلكتروني info@riyadbank.com أو يمكنك التواصل معنا على الرقم 8001242225 لنتمكن من خدمتك.	##########	18	ar	us		1	ar	application bad update update identification try delete reinstall useless	Negative	1	1	0
Google Play Store	e87d841f-d6b1-4911-95b2-c7cbedad5e7d	He asked me to update my ID, saying "please verify connection to the network and try again later, it has been about a month since I last updated."	ابراهيم صالح	##########	عميلنا العزيز، نأمل منك تزويدنا بالملاحظة التي تواجهك عبر البريد الإلكتروني info@riyadbank.com أو يمكنك التواصل معنا على الرقم 8001242225 لنتمكن من خدمتك.	##########	1	ar	us		1	ar	ask update id say please verify connection network try late month since last update	Neutral	0	1	0
Google Play Store	8b68efed-655f-4b8d-8910-a55cab3bc8ee	The update relates to Riyad Bank, it is very important and whatever happens, I will update again.	عماراللهم صل على محمد واله محمد الحرز	##########	عميلنا العزيز، نأسف لسماع ذلك ونأمل منك تزويدنا بالملاحظة التي تواجهك عبر البريد الإلكتروني info@riyadbank.com أو يمكنك التواصل معنا على الرقم 8001242225 لنتمكن من خدمتك.	##########	0	ar	us		1	ar	update relate riyad bank important whatever happen update	Positive	1	1	0
Google Play Store	0ed87d1b-e146-4a3f-9331-4e09efc9bd5f	I deleted the application and redownloaded it, and now it's excellent. Thank you for the response.	حنان الناصر	##########	عميلنا العزيز، نأمل منك التواصل معنا على الرقم 8001242225 أو من خلال البريد الإلكتروني info@riyadbank.com و تزويدنا بملاحظاتك لنتمكن من خدمتك بشكل أفضل.	##########	0	ar	us		5	ar	delete application redownloaded excellent thank response	Positive	0	1	0
Google Play Store	c67e3dbb-9faa-4ed7-8bff-8e6eeb1a689b	There's no need for you to ask me to enable the location every time I open the app. Am I going on a trip?	hamza muqri	##########	عميلنا العزيز، نأمل منك تزويدنا بالملاحظة التي تواجهك عبر البريد الإلكتروني info@riyadbank.com أو يمكنك التواصل معنا على الرقم 8001242225 لنتمكن من خدمتك.	##########	0	ar	us		1	ar	theres need ask enable location every time open app go trip	Neutral	0	1	0
Google Play Store	a908f291-3baa-40fa-8555-3247b4ab047b	Update needs to be updated in order to accept the fact of a bad update, unfortunately. We hope the issue will be addressed.	بدر المهاوش	##########	عميلنا العزيز، نأسف لسماع ذلك ونأمل منك تزويدنا بالملاحظة التي تواجهك عبر البريد الإلكتروني info@riyadbank.com أو يمكنك التواصل معنا على الرقم 8001242225 لنتمكن من خدمتك.	##########	0	ar	us		1	ar	update need update order accept fact bad update unfortunately hope issue address	Negative	1	1	0
Google Play Store	fc26573c-b152-4bf8-9cc6-a9a9a4b06c28	There is a problem with the latest update, it is requesting website activation and constantly getting stuck. Please solve the problem, thank you.	Habib 36	##########	عميلنا العزيز، نأمل منك التواصل معنا على الرقم 8001242225 أو من خلال البريد الإلكتروني info@riyadbank.com و تزويدنا بملاحظاتك لنتمكن من خدمتك بشكل أفضل.	##########	1	ar	us		3	ar	problem late update request website activation constantly get stick please solve problem thank	Negative	0	1	1
Google Play Store	8a176a77-4e83-4edf-9e9f-3bcd38f85a9f	Very good	abdlaziz alshishany	##########			1	ar	us		5	ar	good	Positive	0	0	0
Google Play Store	2b9bf315-b2a5-44bd-8330-634c89bb8723	It is very beautiful.	Bayan Sami	##########			0	ar	us		2	ar	beautiful	Positive	0	0	0
Google Play Store	ec6fc2c2-da94-4b1a-aff3-63d49fe8616d	And not only that, the new update is bad, even adding a beneficiary is not available. Why did you remove the beneficiary addition from the online Riyadh website? The website is much better than the application.	Ibtisam hussain	##########	عميلنا العزيز، يؤسفنا سماع ذلك ونأمل منك التواصل معنا على الرقم 8001242225 أو من خلال البريد الإلكتروني info@riyadbank.com و تزويدنا بملاحظاتك لنتمكن من خدمتك بشكل أفضل.	##########	0	ar	us		1	ar	new update bad even add beneficiary available remove beneficiary addition online riyadh website website much good application	Negative	1	1	0
Google Play Store	fd675194-306c-4b79-b036-fd47da84f6f7	Very bad	Yasser Alghamdi	##########	عميلنا العزيز، يؤسفنا سماع ذلك ونأمل منك التواصل معنا على الرقم 8001242225 أو من خلال البريد الإلكتروني info@riyadbank.com و تزويدنا بملاحظاتك لنتمكن من خدمتك بشكل أفضل.	##########	1	ar	us		1	ar	bad	Negative	1	0	0
Google Play Store	439f7311-7ba8-46d4-844c-f89c6162bc05	He asks me for the location, but I haven't activated it.	Wafa 5298	##########	عميلنا العزيز، نأمل منك التواصل معنا على الرقم 8001242225 أو من خلال البريد الإلكتروني info@riyadbank.com و تزويدنا بملاحظاتك لنتمكن من خدمتك بشكل أفضل.	##########	0	ar	us		1	ar	ask location havent activate	Neutral	0	1	0
Google Play Store	dd7d6cc9-897e-40d1-aa2a-10ed5a4f7caa	Bad	عبدالله المالكي	##########	عميلنا العزيز، يؤسفنا سماع ذلك ونأمل منك التواصل معنا على الرقم 8001242225 أو من خلال البريد الإلكتروني info@riyadbank.com و تزويدنا بملاحظاتك لنتمكن من خدمتك بشكل أفضل.	##########	0	ar	us		1	ar	bad	Neutral	1	0	0
Google Play Store	01339def-411c-4ee5-a113-ca014bda13c9	Very bad application.. Please provide better services than this. The old application was much better than this. Please improve the application to meet the standards of Bank Al-Riyadh.	محمد الحويطي	##########	عميلنا العزيز، يؤسفنا سماع ذلك ونأمل منك التواصل معنا على الرقم 8001242225 أو من خلال البريد الإلكتروني info@riyadbank.com و تزويدنا بملاحظاتك لنتمكن من خدمتك بشكل أفضل.	##########	0	ar	us		1	ar	bad application please provide good service old application much good please improve application meet standards bank alriyadh	Negative	1	0	0
Google Play Store	535289b5-6748-4a57-88a4-7efce8ad47e5	Amazing	موسي رفاعي	##########			0	ar	us		5	ar	amaze	Positive	0	0	0
Google Play Store	752e2432-0243-47c3-8db4-9ee9f2a17b20	The application is failing and not working 😡	مي ناصر	##########	عميلنا العزيز، يؤسفنا سماع ذلك ونأمل منك التواصل معنا على الرقم 8001242225 أو من خلال البريد الإلكتروني info@riyadbank.com و تزويدنا بملاحظاتك لنتمكن من خدمتك بشكل أفضل.	##########	0	ar	us		1	ar	application fail work	Negative	0	1	0
Google Play Store	7ff74481-51b5-4756-9255-bf2f66f1e3b7	"Very bad application doesn't deserve a star at all."	Tahero Omar	##########	عميلنا العزيز، يؤسفنا سماع ذلك ونأمل منك التواصل معنا على الرقم 8001242225 أو من خلال البريد الإلكتروني info@riyadbank.com و تزويدنا بملاحظاتك لنتمكن من خدمتك بشكل أفضل.	##########	0	ar	us		1	ar	bad application doesnt deserve star	Negative	1	0	0
Google Play Store	6cc6a3bb-e72f-4037-91c7-0805f8bbe028	The application, with the update, sometimes crashes due to the incorrect password or username, and I have not found a solution to the problem of logging into the application.	ابو عبدالرحمن	##########	عميلنا العزيز، نأمل منك التواصل معنا على الرقم 8001242225 أو من خلال البريد الإلكتروني info@riyadbank.com و تزويدنا بملاحظاتك لنتمكن من خدمتك بشكل أفضل.	##########	2	ar	us		1	ar	application update sometimes crash due incorrect password username find solution problem log application	Negative	0	1	0
Google Play Store	1e6ee3a5-4e8b-4031-8a34-106c95ba45ec	I don't know how to use it and I don't have any prior judgment without real experience.	Ali Mudhish	##########	عميلنا العزيز، نأمل منك التواصل معنا على الرقم 8001242225 أو من خلال البريد الإلكتروني info@riyadbank.com و تزويدنا بملاحظاتك لنتمكن من خدمتك بشكل أفضل.	##########	0	ar	us		2	ar	dont know use dont prior judgment without real experience	Negative	1	0	0
Google Play Store	cb4aac62-b695-4429-9edb-bd438d775aca	Opening an online account is complicated and I can't understand the link that is supposed to take me to the same website. I should be able to access Absher directly instead of through another application or link.	وفاء إبراهيم	##########	عميلنا العزيز، نأمل منك التواصل معنا على الرقم 8001242225 أو من خلال البريد الإلكتروني info@riyadbank.com و تزويدنا بملاحظاتك لنتمكن من خدمتك بشكل أفضل.	##########	0	ar	us		1	ar	open online account complicate cant understand link suppose take website able access absher directly instead another application link	Negative	1	1	0
Google Play Store	8aa2d3da-bca4-4589-942a-fb85aff66040	I highly recommend that you deal with Al Rajhi Bank; it is easier, better, and faster than Bank Al Riyadh.	تسنيم	##########	عميلنا العزيز، يؤسفنا سماع ذلك ونأمل منك التواصل معنا على الرقم 8001242225 أو من خلال البريد الإلكتروني info@riyadbank.com و تزويدنا بملاحظاتك لنتمكن من خدمتك بشكل أفضل.	##########	0	ar	us		1	ar	highly recommend deal al rajhi bank easy good fast bank al riyadh	Positive	0	0	0
Google Play Store	e32331eb-3f03-4736-90fc-d645a9fcaafa	Excellent	aloosam 6777	##########			0	ar	us		5	ar	excellent	Positive	0	0	0
Google Play Store	2476074c-c3e9-40c6-8700-720a50a91e15	Diverse services	عيدEid حمودHomod	##########			0	ar	us		5	ar	diverse service	Positive	0	0	0
Google Play Store	7576dfbe-9ccc-4fdb-9047-28b1dacc614f	I want to open the program, but it's not opening. I don't know if my departure from Saudi Arabia has anything to do with it, or I don't know the reason.	ام عبادي بوحليقه	##########	عميلنا العزيز، نأمل منك التواصل معنا على الرقم 8001242225 أو من خلال البريد الإلكتروني info@riyadbank.com و تزويدنا بملاحظاتك لنتمكن من خدمتك بشكل أفضل.	##########	0	ar	us		1	ar	want open program open dont know departure saudi arabia anything dont know reason	Negative	0	1	0
Google Play Store	d898cb5a-18eb-4c16-b09f-02ec398083b9	Half of a very bright star.	Sayeed مصر انا شاء الله الفوز Masri	##########	عميلنا العزيز، يؤسفنا سماع ذلك ونأمل منك التواصل معنا على الرقم 8001242225 أو من خلال البريد الإلكتروني info@riyadbank.com و تزويدنا بملاحظاتك لنتمكن من خدمتك بشكل أفضل.	##########	0	ar	us		1	ar	half bright star	Positive	0	0	0
Google Play Store	0a2f73eb-dceb-43bd-86e8-706f57b47d85	The application update will provide location tracking and will not open afterward.	عادل الضو	##########	عميلنا العزيز، يؤسفنا سماع ذلك ونأمل منك التواصل معنا على الرقم 8001242225 أو من خلال البريد الإلكتروني info@riyadbank.com و تزويدنا بملاحظاتك لنتمكن من خدمتك بشكل أفضل.	##########	0	ar	us		2	ar	application update provide location track open afterward	Neutral	0	1	0
Google Play Store	b347ab15-7757-4920-9f72-da14c970ba9d	safAFf	wgtw	##########			0	ar	us		4	ar	safaff	Neutral	0	0	0
Google Play Store	da4c28ff-4688-4913-b69a-2032a125811d	There is a problem in accessing the website.	b7r b7re	##########	عميلنا العزيز، نأمل منك التواصل معنا على الرقم 8001242225 أو من خلال البريد الإلكتروني info@riyadbank.com و تزويدنا بملاحظاتك لنتمكن من خدمتك بشكل أفضل.	##########	0	ar	us		1	ar	problem access website	Negative	0	1	0
Google Play Store	33ab18eb-738f-4db1-8e7d-61288707654e	Cute	مريم العبدالواحد	##########			0	ar	us		5	ar	cute	Positive	0	0	0
Google Play Store	53be2fa4-c6ca-46c9-8f00-dca67ed037cb	The new update writes "Activate the website, activate it," but it does not work.	Emad Elhalwagi	##########	عميلنا العزيز، يؤسفنا سماع ذلك ونأمل منك التواصل معنا على الرقم 8001242225 أو من خلال البريد الإلكتروني info@riyadbank.com و تزويدنا بملاحظاتك لنتمكن من خدمتك بشكل أفضل.	##########	0	ar	us		5	ar	new update write activate website activate work	Negative	0	1	0
Google Play Store	d79854b8-74d7-4e37-9cb6-353c0bd6322f	The program does not open and asks for the location, and the location is open and available. What should I do? Please help solve the problem.	هدوو ووء	##########	عميلنا العزيز، نأمل منك التواصل معنا على الرقم 8001242225 أو من خلال البريد الإلكتروني info@riyadbank.com و تزويدنا بملاحظاتك لنتمكن من خدمتك بشكل أفضل.	##########	0	ar	us		1	ar	program open ask location location open available please help solve problem	Negative	0	1	0
Google Play Store	9d43a7f9-0cb2-41ee-b2b8-a79000d60c31	I hope you fix the issue of the exaggerated amount of financing when repaying. It appears that you have paid only half of the remaining amount. It's incorrect.	وجعان مجهلي	##########	عميلنا العزيز، نأمل منك التواصل معنا على الرقم 8001242225 أو من خلال البريد الإلكتروني info@riyadbank.com و تزويدنا بملاحظاتك لنتمكن من خدمتك بشكل أفضل.	##########	0	ar	us		1	ar	hope fix issue exaggerate amount finance repay appear pay half remain amount incorrect	Negative	0	1	0
Google Play Store	e4182d6e-87a3-40ab-a412-890eb6757b8c	Bad, slow, and the text message is delayed in delivery. I have been waiting for my family for an hour and the authentication message has not arrived.	Youssef Abc	##########	عميلنا العزيز، نأسف لسماع ذلك ونأمل منك تزويدنا بالملاحظة التي تواجهك عبر البريد الإلكتروني info@riyadbank.com أو يمكنك التواصل معنا على الرقم 8001242225 لنتمكن من خدمتك.	##########	0	ar	us		3	ar	bad slow text message delay delivery wait family hour authentication message arrive	Negative	1	0	1
Google Play Store	cff48784-e3ba-450d-9fe0-894de93bca16	Good and loyal improvement.	آحمد الكحلان	##########			0	ar	us		5	ar	good loyal improvement	Positive	0	0	0
Google Play Store	6dba9993-296f-43ed-9462-9cffc7298cc0	The application is bad, it always delivers the activation code late and does not accept facial recognition, although the confirmation call and message are received. Every time I try to reactivate, the first fingerprint is canceled and I have to start over, and the problem has been going on for more than 3 months!!!!	zloxm 1	##########	عميلنا العزيز، يؤسفنا سماع ذلك ونأمل منك التواصل معنا على الرقم 8001242225 أو من خلال البريد الإلكتروني info@riyadbank.com و تزويدنا بملاحظاتك لنتمكن من خدمتك بشكل أفضل.	##########	0	ar	us		1	ar	application bad always deliver activation code late accept facial recognition although confirmation call message receive every time try reactivate first fingerprint cancel start problem go months	Negative	1	1	0
Google Play Store	2e2a11a6-467a-44ae-9537-0371d36c7ec8	Beautiful	ممدوح ابوزيد	##########			0	ar	us		5	ar	beautiful	Positive	0	0	0
Google Play Store	623d0584-8de9-4930-95ed-d15c001280a2	My current account at the bank will be closed, God willing.	John Smith	##########	عميلنا العزيز، نأسف لسماع ذلك ونأمل منك تزويدنا بالملاحظة التي تواجهك عبر البريد الإلكتروني info@riyadbank.com أو يمكنك التواصل معنا على الرقم 8001242225 لنتمكن من خدمتك.	##########	0	ar	us		1	ar	current account bank close god will	Neutral	1	0	0
Google Play Store	0246442c-41d8-4c97-9342-57e7f744f1ea	Good.	عبدالعزيز فهد	##########			0	ar	us		4	ar	good	Positive	0	0	0
Google Play Store	a6770c15-188c-49e0-af53-af3c13922e8b	The application does not open after the update.	Jannat Abu Shaheen	##########	عميلنا العزيز، نأمل منك التواصل معنا على الرقم 8001242225 أو من خلال البريد الإلكتروني info@riyadbank.com و تزويدنا بملاحظاتك لنتمكن من خدمتك بشكل أفضل.	##########	0	ar	us		1	ar	application open update	Neutral	0	1	0
Google Play Store	f4732de4-f078-4cfc-9d4d-540112eab858	Excellent service	Sabah Hajjar	##########			0	ar	us		5	ar	excellent service	Positive	0	0	0
Google Play Store	3168c545-865d-4706-be41-111a3a47fe31	The application is bad. When I enter the application, it redirects me to activate the location, but the location is already activated.	منصور احمد	##########	عميلنا العزيز، يؤسفنا سماع ذلك ونأمل منك التواصل معنا على الرقم 8001242225 أو من خلال البريد الإلكتروني info@riyadbank.com و تزويدنا بملاحظاتك لنتمكن من خدمتك بشكل أفضل.	##########	0	ar	us		1	ar	application bad enter application redirect activate location location already activate	Negative	1	1	0
Google Play Store	6cee2e71-7dea-4a92-845c-5ec4da4399c1	Excellent application and exceptional bank with excellent services. It has what I have been looking for for a while. Your bank is Bank Al-Riyadh.	الوافي	##########			0	ar	us		5	ar	excellent application exceptional bank excellent service look bank bank alriyadh	Positive	0	0	0
Google Play Store	b7b61d31-899f-4187-a747-03508f99e088	Every time I try, it tells me to try again?!	mohammed jaber	##########	عميلنا العزيز، نأمل منك التواصل معنا على الرقم 8001242225 أو من خلال البريد الإلكتروني info@riyadbank.com و تزويدنا بملاحظاتك لنتمكن من خدمتك بشكل أفضل.	##########	0	ar	us		1	ar	every time try tell try	Negative	0	1	0
Google Play Store	e99563fe-9646-49ef-aab1-270cf37cbcd6	The latest update is very, very bad. Why do you need to activate the website? This action is unnecessary.	salem obed	##########	عميلنا العزيز، يؤسفنا سماع ذلك ونأمل منك التواصل معنا على الرقم 8001242225 أو من خلال البريد الإلكتروني info@riyadbank.com و تزويدنا بملاحظاتك لنتمكن من خدمتك بشكل أفضل.	##########	6	ar	us		1	ar	late update bad need activate website action unnecessary	Negative	1	0	0
Google Play Store	c7d4f747-b935-414a-8b76-a7947cef8cd2	Honestly, there is no bank like it. May God bless you.	ABDULLAH MAZAIN	##########			0	ar	us		5	ar	honestly bank like may god bless	Positive	1	0	0
Google Play Store	a0cf917c-2ffc-4a4d-979d-a11f809b4f8d	I want improvements in the application regarding the DBF file. The receipt file is not working and it gives me an invalid error.	متفائل ابوفيصل	##########	عميلنا العزيز، نأمل منك التواصل معنا على الرقم 8001242225 أو من خلال البريد الإلكتروني info@riyadbank.com و تزويدنا بملاحظاتك لنتمكن من خدمتك بشكل أفضل.	##########	0	ar	us		1	ar	want improvements application regard dbf file receipt file work give invalid error	Negative	0	1	0
Google Play Store	d1b103b8-758f-4fee-b5ee-89613459c05d	The application is bad, it keeps asking for location and doesn't work properly. It's strange that a bank can't develop a good application and provide good services. Learn from other banks like AlAhli and Al Rajhi, they have simple, easy, and convenient applications and services in the city of Riyadh.	أستغفر الله العظيم	##########	عميلنا العزيز، يؤسفنا سماع ذلك ونأمل منك التواصل معنا على الرقم 8001242225 أو من خلال البريد الإلكتروني info@riyadbank.com و تزويدنا بملاحظاتك لنتمكن من خدمتك بشكل أفضل.	##########	0	ar	us		1	ar	application bad keep ask location doesnt work properly strange bank cant develop good application provide good service learn bank like alahli al rajhi simple easy convenient applications service city riyadh	Negative	1	1	0
Google Play Store	991de753-82d1-45eb-b0b1-98a60eaac816	Unfortunately, it's bad. I can't log in and it directs me to the settings.	Hassan Ghazwany	##########	عميلنا العزيز، نأمل منك التواصل معنا على الرقم 8001242225 أو من خلال البريد الإلكتروني info@riyadbank.com و تزويدنا بملاحظاتك لنتمكن من خدمتك بشكل أفضل.	##########	1	ar	us		1	ar	unfortunately bad cant log direct settings	Negative	1	1	0
Google Play Store	b312e4dd-e559-44b0-810f-51865a845857	The update cannot be installed.	محمد العمار	##########	عميلنا العزيز، نأمل منك التواصل معنا على الرقم 8001242225 أو من خلال البريد الإلكتروني info@riyadbank.com و تزويدنا بملاحظاتك لنتمكن من خدمتك بشكل أفضل.	##########	0	ar	us		1	ar	update instal	Negative	0	1	0
Google Play Store	e3396f95-bacb-47c4-8937-1dce80e03234	With the latest update, the program refuses to open without updating it, and if I update it, it refuses to complete the installation of the new updates. What is the solution?!!	وائل الراضي	##########	عميلنا العزيز، نأمل منك التواصل معنا على الرقم 8001242225 أو من خلال البريد الإلكتروني info@riyadbank.com و تزويدنا بملاحظاتك لنتمكن من خدمتك بشكل أفضل.	##########	0	ar	us		2	ar	late update program refuse open without update update refuse complete installation new update solution	Negative	0	1	0
Google Play Store	315d1548-436b-4d7d-8723-e40593cc7ce9	Very bad, I tried to open an account but without any success.	بندر القثامي	##########	عميلنا العزيز، يؤسفنا سماع ذلك ونأمل منك التواصل معنا على الرقم 8001242225 أو من خلال البريد الإلكتروني info@riyadbank.com و تزويدنا بملاحظاتك لنتمكن من خدمتك بشكل أفضل.	##########	0	ar	us		1	ar	bad try open account without success	Negative	1	1	0
Google Play Store	aed14223-5539-4ac0-b480-7642d52aaac0	Last garbage update is not working.	حسام الحلقي	##########	عميلنا العزيز، نأسف لسماع ذلك ونأمل منك تزويدنا بالملاحظة التي تواجهك عبر البريد الإلكتروني info@riyadbank.com أو يمكنك التواصل معنا على الرقم 8001242225 لنتمكن من خدمتك.	##########	0	ar	us		1	ar	last garbage update work	Negative	0	1	0
Google Play Store	ce737117-94a1-4e07-84e9-2bb2a56f49b0	Very good, thank you.	Loooleee Al	##########			0	ar	us		5	ar	good thank	Positive	0	0	0
Google Play Store	dc9661a5-293a-4f1f-bbc8-a002bc51cd23	Excellent.	Ali Ali2	##########			0	ar	us		5	ar	excellent	Positive	0	0	0
Google Play Store	d8c9dadc-4ebc-49b0-884b-a538d9e59a22	Excellent	سعيد محمد	##########			0	ar	us		5	ar	excellent	Positive	0	0	0
Google Play Store	7b1884d4-8436-4c85-8934-c3d59686889c	Good.	الجن ”جن“ سم الجن	##########			0	ar	us		5	ar	good	Positive	0	0	0
Google Play Store	4519f5be-dd5c-4956-b9ad-7dd5a9aa4f5c	Terrible, terrible, terrible, terrible, terrible. The worst bank, they are failures and idiots.	عبدالعزيز	##########	عميلنا العزيز، يؤسفنا سماع ذلك ونأمل منك التواصل معنا على الرقم 8001242225 أو من خلال البريد الإلكتروني info@riyadbank.com و تزويدنا بملاحظاتك لنتمكن من خدمتك بشكل أفضل.	##########	0	ar	us		1	ar	terrible terrible terrible terrible terrible bad bank failures idiots	Negative	1	0	0
Google Play Store	8cefcd75-5104-4a52-8579-ba6ead348d9a	What's the problem with the app? I didn't enter my username and password, it's supposed to be automatic like on the iPhone. Every time I exit the app, I have to start over. Find a solution for us, it's not fair that the app on the iPhone is so beautiful while on Android it's bad. Please allow us to receive messages.	احمد المسعودي	##########	عميلنا العزيز، يؤسفنا سماع ذلك ونأمل منك التواصل معنا على الرقم 8001242225 أو من خلال البريد الإلكتروني info@riyadbank.com و تزويدنا بملاحظاتك لنتمكن من خدمتك بشكل أفضل.	##########	0	ar	us		1	ar	whats problem app didnt enter username password suppose automatic like iphone every time exit app start find solution us fair app iphone beautiful android bad please allow us receive message	Negative	1	1	0
Google Play Store	875f10c6-e294-400c-98c4-95b830ff9510	Excellent	محمدمحه المجرشي	##########			0	ar	us		5	ar	excellent	Positive	0	0	0
Google Play Store	38db70a8-eaa2-4581-b070-f1ea03e930f8	Update message and actually there is no update happening in any way, whether through Wi-Fi or otherwise.	Hussein Babiker	##########	عميلنا العزيز، نأمل منك التواصل معنا على الرقم 8001242225 أو من خلال البريد الإلكتروني info@riyadbank.com و تزويدنا بملاحظاتك لنتمكن من خدمتك بشكل أفضل.	##########	3	ar	us		4	ar	update message actually update happen way whether wifi otherwise	Negative	0	1	0
Google Play Store	4a9d14be-3fc2-469f-8ea4-c40ea4ef7ed8	Same as your comments, the application does not open after the update. It is the worst banking application I have ever encountered.	D Dd	##########	عميلنا العزيز، يؤسفنا سماع ذلك ونأمل منك التواصل معنا على الرقم 8001242225 أو من خلال البريد الإلكتروني info@riyadbank.com و تزويدنا بملاحظاتك لنتمكن من خدمتك بشكل أفضل.	##########	0	ar	us		1	ar	comment application open update bad bank application ever encounter	Negative	1	1	0
Google Play Store	952d9b92-4f1b-49a6-a78e-ecb915e26b84	The automated response device says, "Press 1 to confirm your press." I pressed it a million times and each time it denies it. Find me a solution, I've been trying all day.	Alyaa Asiru	##########	عميلنا العزيز، نأمل منك التواصل معنا على الرقم 8001242225 أو من خلال البريد الإلكتروني info@riyadbank.com و تزويدنا بملاحظاتك لنتمكن من خدمتك بشكل أفضل.	##########	0	ar	us		1	ar	automate response device say press confirm press press million time time deny find solution ive try day	Negative	0	1	0
Google Play Store	4a5a0440-dad9-4b4b-8e43-d871085e2d70	There is a problem with updating the application. After downloading the new version, a message appears saying installation failed. Huawei Y9 mobile phone. Please solve the problem to continue using it.	Mohamed Elbasiony	##########	عميلنا العزيز، نأمل منك التواصل معنا على الرقم 8001242225 أو من خلال البريد الإلكتروني info@riyadbank.com و تزويدنا بملاحظاتك لنتمكن من خدمتك بشكل أفضل.	##########	0	ar	us		1	ar	problem update application download new version message appear say installation fail huawei mobile phone please solve problem continue use	Negative	0	1	0
Google Play Store	41f15fb3-d8eb-46e8-b514-d733066e4017	The application no longer works.	محمد عبدالله	2023-05-08 06:54:00	عميلنا العزيز، نأمل منك التواصل معنا على الرقم 8001242225 لنتمكن من خدمتك.	##########	0	ar	us		1	ar	application long work	Negative	0	1	0
Google Play Store	1d0ef6c5-8e7a-4edc-8b16-9cd36be1b69f	The application does not update.	Nawal Ahmad	##########	عميلنا العزيز، نأمل منك التواصل معنا على الرقم 8001242225 لنتمكن من خدمتك.	##########	0	ar	us		1	ar	application update	Negative	0	1	0
Google Play Store	a9bef2d9-9c51-4825-acb8-c303dc8fb0d3	Very bad for use.	صالح الحارثي	##########	عميلنا العزيز، نأمل منك التواصل معنا على الرقم 8001242225 لنتمكن من خدمتك.	##########	0	ar	us		1	ar	bad use	Negative	1	0	0
Google Play Store	8db71ed6-9f21-4d38-88d1-ca5dfc5a9bb1	"I can't add a new beneficiary after the latest update. Please reply."	Wail Margni	##########	عميلنا العزيز، نأمل منك التواصل معنا على الرقم 8001242225 لنتمكن من خدمتك.	##########	0	ar	us		1	ar	cant add new beneficiary late update please reply	Negative	0	1	0
Google Play Store	ac64c79a-af14-4938-a723-b7c5b77b8183	The application is heavy and slow on the Android system. It requests an update but doesn't update, and I have tried updating it multiple times without success. I had to uninstall it and reinstall it. It's not like any banking application.	Adel H. S. M	##########			0	ar	us		2	ar	application heavy slow android system request update doesnt update try update multiple time without success uninstall reinstall like bank application	Negative	0	0	1
Google Play Store	13661eb6-3fad-4f45-b7bd-646880b759b6	The application is not working. It requests access to the location, and the application has the location access permission activated.	ستدس الدوسؤي	##########			0	ar	us		1	ar	application work request access location application location access permission activate	Negative	0	1	0
Google Play Store	fa395d4a-4171-430b-974e-38a21f38459f	Inability to download the application.	سيد محمد	2023-05-07 04:41:00			0	ar	us		1	ar	inability download application	Negative	0	1	0
Google Play Store	2d8e0966-a761-4f16-a109-5f232ff726b5	It is very difficult to update the application from Google... Please address the issue.	MOHAMMED Yousif	2023-05-07 04:39:00			0	ar	us		1	ar	difficult update application google please address issue	Negative	1	1	0
Google Play Store	c500dd64-58ad-4002-a664-52387912febd	The application update is being rejected.	Ahmad Ali	##########			0	ar	us		2	ar	application update reject	Negative	0	1	0
Google Play Store	2a095bd6-b6cb-4040-8562-d076f8dd1e6e	I have dealt with a very bad bank in every aspect.	ali aljabarh	##########			0	ar	us		1	ar	deal bad bank every aspect	Negative	1	0	0
Google Play Store	8f1682bc-31f8-4dd5-a757-65431069e787	Every two weeks he asks for an update, and when I do update it, he doesn't install it again. Then, I re-download it and update it, and again after two weeks, he asks for an update. Why is this happening even though he insists on using the application?	غزوو الرويلي	##########			0	ar	us		1	ar	every two weeks ask update update doesnt install redownload update two weeks ask update happen even though insist use application	Negative	0	1	0
Google Play Store	a88fd2a6-1cdf-4406-a783-277b6db921f9	Very very very bad. The mobile version has been changed to a very modern version, but the application still doesn't work.	Abo Alzoz	2023-05-06 07:50:00			22	ar	us		1	ar	bad mobile version change modern version application still doesnt work	Negative	1	1	0
Google Play Store	43711db7-b32b-48fe-9309-2dfa69d6d378	Instead of improving, it gets worse, and of course there is no response or solution. Please come and waste your time with customer service who have no authority.	Ali	2023-05-06 07:47:00			15	ar	us		1	ar	instead improve get bad course response solution please come waste time customer service authority	Negative	1	0	1
Google Play Store	7bb7997e-d510-480f-9c80-8a41b928f835	Excellent very excellent	صابر المنهالي	##########			0	ar	us		5	ar	excellent excellent	Positive	0	0	0
Google Play Store	3fd9b5c2-4db6-44c0-ad74-9a1c465ce034	The application is good.	Saliha Boure	##########			0	ar	us		4	ar	application good	Positive	0	0	0
Google Play Store	8f170b69-312d-429d-be9d-b7a83b45ede7	Thank you, Al Riyadh Bank. Your application is excellent and meets all our needs.	عبدالله الشرقاوي	##########	عميلنا العزيز، نأمل منك التواصل معنا على الرقم 8001242225 أو من خلال البريد الإلكتروني info@riyadbank.com و تزويدنا بملاحظاتك لنتمكن من خدمتك بشكل أفضل.	##########	4	ar	us		5	ar	thank al riyadh bank application excellent meet need	Positive	0	0	0
Google Play Store	1d0f1ec6-55d5-4366-8d9a-a9cc4f3c20ca	Why is the application not working? It asks for location activation, but it still doesn't work, even though the location is already activated.	محمد عبد الباقي	##########			0	ar	us		1	ar	application work ask location activation still doesnt work even though location already activate	Negative	0	1	0
Google Play Store	a8fde353-bc28-4f0c-8f5d-997d4e830d61	The update is not being accepted. I have repeated it several times, from Google Play and from the browser, but it is not useful.	Sayah aid	##########	عميلنا العزيز، نأمل منك التواصل معنا على الرقم 8001242225 أو من خلال البريد الإلكتروني info@riyadbank.com و تزويدنا بملاحظاتك لنتمكن من خدمتك بشكل أفضل.	##########	0	ar	us		1	ar	update accept repeat several time google play browser useful	Negative	0	1	0
Google Play Store	3f086d39-1eda-46df-9117-af335d00ec9e	Beautiful ❤️	Ibn Al-sudan	##########			0	ar	us		5	ar	beautiful	Positive	0	0	0
Google Play Store	17c63812-cf61-4fdc-8c19-1dc7fb829dc4	Very good.	Raja Aladdam	##########			0	ar	us		5	ar	good	Positive	0	0	0
Google Play Store	5fa60f6a-e56f-48e2-b2af-1239c68ee209	Good.	منى السعيد	##########			0	ar	us		5	ar	good	Positive	0	0	0
Google Play Store	28c1026a-76b7-477a-befa-252eece96101	They are requesting an update that they are unable to do, there are many problems.	Ali Alshebami	##########	عميلنا العزيز، يؤسفنا سماع ذلك ونأمل منك التواصل معنا على الرقم 8001242225 أو من خلال البريد الإلكتروني info@riyadbank.com و تزويدنا بملاحظاتك لنتمكن من خدمتك بشكل أفضل.	##########	0	ar	us		5	ar	request update unable many problems	Negative	0	1	0
Google Play Store	b64058ea-40a1-471c-b02c-ff0c796cac55	I am trying to open the application, it asks me to update, I try to update but it does not respond, it says "try again later."	يحيى احمد	##########	عميلنا العزيز، نأمل منك التواصل معنا على الرقم 8001242225 أو من خلال البريد الإلكتروني info@riyadbank.com و تزويدنا بملاحظاتك لنتمكن من خدمتك بشكل أفضل.	##########	0	ar	us		1	ar	try open application ask update try update respond say try late	Negative	0	1	0
Google Play Store	844f25b9-1618-4790-a452-c85e453bed8e	Complex application..	kas sud	##########	عميلنا العزيز، يؤسفنا سماع ذلك ونأمل منك التواصل معنا على الرقم 8001242225 أو من خلال البريد الإلكتروني info@riyadbank.com و تزويدنا بملاحظاتك لنتمكن من خدمتك بشكل أفضل.	##########	0	ar	us		1	ar	complex application	Neutral	1	0	0
Google Play Store	fe49e897-5a39-40d9-a837-4f5f1340b96e	There are many stars on it (referring to something), but the new update, specifically, does not support Android phones.	للشيش والمعسلات المعسلات	2023-05-05 04:19:00	عميلنا العزيز، يؤسفنا سماع ذلك ونأمل منك التواصل معنا على الرقم 8001242225 أو من خلال البريد الإلكتروني info@riyadbank.com و تزويدنا بملاحظاتك لنتمكن من خدمتك بشكل أفضل.	##########	0	ar	us		1	ar	many star refer something new update specifically support android phone	Negative	1	0	0
Google Play Store	72101d5b-0334-4e26-8ff1-0449995ef68d	The application is very difficult, it does not accept several attempts to log in, but without any purpose.	عبدالواحد ال سواد	2023-05-05 02:18:00	عميلنا العزيز، يؤسفنا سماع ذلك ونأمل منك التواصل معنا على الرقم 8001242225 أو من خلال البريد الإلكتروني info@riyadbank.com و تزويدنا بملاحظاتك لنتمكن من خدمتك بشكل أفضل.	##########	0	ar	us		1	ar	application difficult accept several attempt log without purpose	Negative	1	1	0
Google Play Store	94556fd8-6ad2-4f04-83fa-6d4783e05ce1	Fingerprint does not work.	agmh agmh	##########	عميلنا العزيز، نأمل منك التواصل معنا على الرقم 8001242225 أو من خلال البريد الإلكتروني info@riyadbank.com و تزويدنا بملاحظاتك لنتمكن من خدمتك بشكل أفضل.	##########	0	ar	us		3	ar	fingerprint work	Negative	0	1	0
Google Play Store	d39b27b9-b26f-4b50-b0af-cbb16eaae7f8	Excellent experience	ابوفهد	##########			1	ar	us		5	ar	excellent experience	Positive	0	0	0
Google Play Store	867573a7-10da-468d-bae2-3695dfc7f301	The application does not work at all, very very bad.	Ehab Abo zaied	##########	عميلنا العزيز، يؤسفنا سماع ذلك ونأمل منك التواصل معنا على الرقم 8001242225 أو من خلال البريد الإلكتروني info@riyadbank.com و تزويدنا بملاحظاتك لنتمكن من خدمتك بشكل أفضل.	##########	0	ar	us		1	ar	application work bad	Negative	1	1	0
Google Play Store	0a2b1ea8-b826-44e3-9d6f-b05ac9e03ea5	It can be translated to "disliked" or "not interested."	K•S•A	##########	عميلنا العزيز، يؤسفنا سماع ذلك ونأمل منك التواصل معنا على الرقم 8001242225 أو من خلال البريد الإلكتروني info@riyadbank.com و تزويدنا بملاحظاتك لنتمكن من خدمتك بشكل أفضل.	##########	0	ar	us		1	ar	translate dislike interest	Negative	1	0	0
Google Play Store	d0b52829-cdc8-4a43-a38b-2fc4e2ee6466	Amazing	جراح المطيري	##########			0	ar	us		5	ar	amaze	Positive	0	0	0
Google Play Store	7d709974-180e-437c-8cf0-d9fb9bfc5a42	One of the worst applications, especially after the latest update.	ABO MOHAMMED	2023-05-04 03:58:00	عميلنا العزيز، يؤسفنا سماع ذلك ونأمل منك التواصل معنا على الرقم 8001242225 أو من خلال البريد الإلكتروني info@riyadbank.com و تزويدنا بملاحظاتك لنتمكن من خدمتك بشكل أفضل.	##########	0	ar	us		1	ar	one bad applications especially late update	Negative	1	0	0
Google Play Store	95888615-39f3-477d-bae4-a6be8c337e54	The bank is excellent in everything, honestly.	متخصصون في إقامة المناسبات والمؤتمرات والمعارض	2023-05-04 00:32:00			0	ar	us		5	ar	bank excellent everything honestly	Positive	0	0	0
Google Play Store	c87b2aa3-c84e-4029-b921-a27b4cdce2c5	Bad for the forest. Half a star is not permissible/allowed in it.	Sa Sa	##########	عميلنا العزيز، يؤسفنا سماع ذلك ونأمل منك التواصل معنا على الرقم 8001242225 أو من خلال البريد الإلكتروني info@riyadbank.com و تزويدنا بملاحظاتك لنتمكن من خدمتك بشكل أفضل.	##########	0	ar	us		1	ar	bad forest half star permissibleallowed	Negative	1	0	0
Google Play Store	4bb354f1-236c-4fa7-8547-bc76bcb7a13a	The program is malfunctioning, the entire transfer system is down. I have deleted the program and reinstalled it, and I contacted you and you started lecturing me. I received messages from you saying that it has been fixed, but it hasn't been fixed at all.	خالد الفهد	##########	عميلنا العزيز، نأمل منك التواصل معنا على الرقم 8001242225 أو من خلال البريد الإلكتروني info@riyadbank.com و تزويدنا بملاحظاتك لنتمكن من خدمتك بشكل أفضل.	##########	0	ar	us		1	ar	program malfunction entire transfer system delete program reinstall contact start lecture receive message say fix hasnt fix	Negative	0	1	0
Google Play Store	7202dbe6-ccf2-45e3-a6e7-d1c5a471eba4	What's the problem? I try to log into my account, but it doesn't accept it.	عبد الله الشمري	##########	عميلنا العزيز، نأمل منك التواصل معنا على الرقم 8001242225 أو من خلال البريد الإلكتروني info@riyadbank.com و تزويدنا بملاحظاتك لنتمكن من خدمتك بشكل أفضل.	##########	0	ar	us		1	ar	whats problem try log account doesnt accept	Negative	0	1	0
Google Play Store	4d197b6a-ae1b-4f62-a8a3-f6d3716c2a39	Good.	zoz lqarni	##########			0	ar	us		5	ar	good	Positive	0	0	0
Google Play Store	f7b546d7-f8d4-4dc8-ba57-44e7d690569c	Very enjoyable	عايض الدوسري	##########			0	ar	us		5	ar	enjoyable	Positive	0	0	0
Google Play Store	a69090fa-5828-4555-be6b-75f98a0183f0	Brilliance	عبد العزيز جمعة الجاسم	##########			0	ar	us		5	ar	brilliance	Positive	0	0	0
Google Play Store	087d539f-3737-4514-b704-8cb4aba90b36	"A the worst application, a failed bank, and I feel like the worst dealing with Al Riyadh Bank for a week. I have been unable to access my account, and they keep saying the website is not functioning, I don't know what is going on."	غالي الغالي	##########	عميلنا العزيز، يؤسفنا سماع ذلك ونأمل منك التواصل معنا على الرقم 8001242225 أو من خلال البريد الإلكتروني info@riyadbank.com و تزويدنا بملاحظاتك لنتمكن من خدمتك بشكل أفضل.	##########	0	ar	us		1	ar	bad application fail bank feel like bad deal al riyadh bank week unable access account keep say website function dont know go	Negative	1	1	0
Google Play Store	3bdf683a-423b-4bf1-8c6f-b048a5bd802c	For those experiencing issues with the application, the problem has been resolved by going to the device settings, then entering the security and privacy section and enabling the location access option. As for those using a Huawei device, they can go to the security and privacy section in the settings and enable the location access option. After that, the application will open easily with you.	بندر بن محمد	##########			3	ar	us		5	ar	experience issue application problem resolve go device settings enter security privacy section enable location access option use huawei device go security privacy section settings enable location access option application open easily	Neutral	0	1	0
Google Play Store	8a0a48d1-3134-43f3-964c-8f8bc1ed6633	Unfortunately, this is a failed and strange application. It is a Saudi bank application compared to other bank applications, such as Al Rajhi or Alinma.	Bader Al-Mutairi	##########	عميلنا العزيز، يؤسفنا سماع ذلك ونأمل منك التواصل معنا على الرقم 8001242225 أو من خلال البريد الإلكتروني info@riyadbank.com و تزويدنا بملاحظاتك لنتمكن من خدمتك بشكل أفضل.	##########	0	ar	us		1	ar	unfortunately fail strange application saudi bank application compare bank applications al rajhi alinma	Negative	1	0	0
Google Play Store	b27908e8-eb44-4270-a400-5342c2caa0a5	For about four days, there have been problems where I have to delete the application and download it again for it to work, but then the same problem occurs. The previous version is better. Please solve the problem as soon as possible. I'm tired of deleting and reinstalling it. 😡😡	Loord Abo Saad	##########	عميلنا العزيز، نأسف لسماع ذلك ونأمل منك تزويدنا بالملاحظة التي تواجهك عبر البريد الإلكتروني info@riyadbank.com أو يمكنك التواصل معنا على الرقم 8001242225 لنتمكن من خدمتك.	##########	3	ar	us		1	ar	four days problems delete application download work problem occur previous version good please solve problem soon possible im tire delete reinstall	Negative	0	1	0
Google Play Store	e8eb599f-9e36-489c-9e15-c2d732364c5d	Excellent, thank you very much.	tur Tue	##########			1	ar	us		5	ar	excellent thank much	Positive	0	0	0
Google Play Store	748c1c27-7806-4aa6-bbdc-57d251c552cc	The new update doesn't open the application for me through fingerprint.	abo ali	##########	عميلنا العزيز، نأمل منك تزويدنا بالملاحظة التي تواجهك عبر البريد الإلكتروني info@riyadbank.com أو يمكنك التواصل معنا على الرقم 8001242225 لنتمكن من خدمتك.	##########	0	ar	us		1	ar	new update doesnt open application fingerprint	Negative	0	1	0
Google Play Store	86bd0635-4cd6-42c3-80c6-ebe2dfaeff58	nice services	MRHF FA	##########			0	ar	us		5	ar	nice service	Positive	0	0	0
Google Play Store	051de4ca-c7a3-416c-8094-ef663cb1f35f	After the latest update, the application no longer opens at all except with fingerprint recognition. Also, I cannot perform any operations except through the ATM. Please resolve the Android problems as it cannot be opened at all.	tahir tahir	##########	عميلنا العزيز، نأسف لسماع ذلك ونأمل منك تزويدنا بالملاحظة التي تواجهك عبر البريد الإلكتروني info@riyadbank.com أو يمكنك التواصل معنا على الرقم 8001242225 لنتمكن من خدمتك.	##########	0	ar	us		1	ar	late update application long open except fingerprint recognition also perform operations except atm please resolve android problems open	Negative	0	1	0
Google Play Store	66749974-76c2-4962-b551-86ec00d6ea4f	Tired and doesn't open	Gobran Alqahtani	##########	عميلنا العزيز، نأسف لسماع ذلك ونأمل منك تزويدنا بالملاحظة التي تواجهك عبر البريد الإلكتروني info@riyadbank.com أو يمكنك التواصل معنا على الرقم 8001242225 لنتمكن من خدمتك.	##########	0	ar	us		1	ar	tire doesnt open	Negative	0	1	0
Google Play Store	85cdf18f-3785-4bd2-add7-b20552b0701a	Unfortunately, it was a disappointing experience starting from opening the account and the obstacles I faced online. Then I had to go to 3 branches and it took a couple of days to finally complete it. Struggling with the malfunctioning electronic application was frustrating. It wasted time and caused a lot of frustration. It's an indescribable feeling and until today, the third consecutive day, I…	لطيفة أحمد	##########	عميلنا العزيز، نأسف لسماع ذلك ونأمل منك تزويدنا بالملاحظة التي تواجهك عبر البريد الإلكتروني info@riyadbank.com أو يمكنك التواصل معنا على الرقم 8001242225 لنتمكن من خدمتك.	##########	0	ar	us		1	ar	unfortunately disappoint experience start open account obstacles face online go branch take couple days finally complete struggle malfunction electronic application frustrate waste time cause lot frustration indescribable feel today third consecutive day still couldnt access application time go back square one	Negative	1	1	1
Google Play Store	f431d109-a603-44a7-871e-39e14565c37e	The application has become worse. Each update makes it worse. This time, it doesn't open with the passcode or fingerprint. It has been a month, and I have been trying to open it, but unfortunately, it is not working.	Ftoom Niji	##########	عميلنا العزيز، نأسف لسماع ذلك ونأمل منك تزويدنا بالملاحظة التي تواجهك عبر البريد الإلكتروني info@riyadbank.com أو يمكنك التواصل معنا على الرقم 8001242225 لنتمكن من خدمتك.	##########	3	ar	us		1	ar	application become bad update make bad time doesnt open passcode fingerprint month try open unfortunately work	Negative	1	1	0
Google Play Store	732b9616-5dd7-4895-b9c1-c354532c8af0	I swear to God, it is one of the worst applications among banks. The world has evolved and banks are competing to be the best, except for Al-Riyadh Bank that is still living in the 90s at the beginning of the internet era. Can you believe that we can't even manage our affairs in this terrible application? We want to transfer money, we want to pay bills, we want to recharge our phones, we want and…	ابو راكان ١١٨ ابراهيم مجرشي 07	##########	عميلنا العزيز، نأسف لسماع ذلك ونأمل منك تزويدنا بالملاحظة التي تواجهك عبر البريد الإلكتروني info@riyadbank.com أو يمكنك التواصل معنا على الرقم 8001242225 لنتمكن من خدمتك.	##########	0	ar	us		1	ar	swear god one bad applications among bank world evolve bank compete best except alriyadh bank still live begin internet era believe cant even manage affairs terrible application want transfer money want pay bill want recharge phone want want work dont know bank management even aware issue despite call year ago tollfree number promise resolve issue swear god problem remain unsolved prove employees…	Negative	1	1	0
Google Play Store	fbc730cc-e564-4679-9e7c-2e0494ba0c2b	Subhan Allah, every update just adds more problems to the competing Al Riyadh Bank application. The competitors are surpassing you by leaps and bounds, while you are still stuck with your old work. Now, after the update, it's not possible to share PDF files or receive notifications for transfers and payments.	بدر بن عبدالرحمن	##########	عميلنا العزيز، نأمل منك التواصل معنا على الرقم 8001242225 أو من خلال البريد الإلكتروني info@riyadbank.com و تزويدنا بملاحظاتك لنتمكن من خدمتك بشكل أفضل.	##########	2	ar	us		1	ar	subhan allah every update add problems compete al riyadh bank application competitors surpass leap bound still stick old work update possible share pdf file receive notifications transfer payments	Negative	0	1	1
Google Play Store	478415c8-5f72-4c0a-9811-cb82cf417bd6	Very much.	عبدالعزيز خبراني	##########	عميلنا العزيز، يؤسفنا سماع ذلك ونأمل منك التواصل معنا على الرقم 8001242225 أو من خلال البريد الإلكتروني info@riyadbank.com و تزويدنا بملاحظاتك لنتمكن من خدمتك بشكل أفضل.	##########	0	ar	us		1	ar	much	Neutral	1	0	0
Google Play Store	2136bbcf-3fe4-4499-a064-12dc6ac42512	Program is tired/exhausted.	سلطان المطيري	##########	عميلنا العزيز، يؤسفنا سماع ذلك ونأمل منك التواصل معنا على الرقم 8001242225 أو من خلال البريد الإلكتروني info@riyadbank.com و تزويدنا بملاحظاتك لنتمكن من خدمتك بشكل أفضل.	##########	0	ar	us		1	ar	program tiredexhausted	Negative	1	0	0
Google Play Store	115815ab-7d05-460e-a7b8-8d2d5562896e	The application has become more complicated and one of the most difficult applications for banks. Every time it asks for location confirmation and every time there is an update, after which it becomes unresponsive and very slow. We hope that the problem will be addressed. Thank you.	عبدالماجد عدلان الشيخ	##########	عميلنا العزيز، يؤسفنا سماع ذلك ونأمل منك التواصل معنا على الرقم 8001242225 أو من خلال البريد الإلكتروني info@riyadbank.com و تزويدنا بملاحظاتك لنتمكن من خدمتك بشكل أفضل.	##########	3	ar	us		1	ar	application become complicate one difficult applications bank every time ask location confirmation every time update become unresponsive slow hope problem address thank	Negative	1	0	1
Google Play Store	085cdb87-ed58-41f8-89f0-14bee8c745f0	The worst bank and the worst application.	ahmad alwan	##########	عميلنا العزيز، يؤسفنا سماع ذلك ونأمل منك التواصل معنا على الرقم 8001242225 أو من خلال البريد الإلكتروني info@riyadbank.com و تزويدنا بملاحظاتك لنتمكن من خدمتك بشكل أفضل.	##########	0	ar	us		1	ar	bad bank bad application	Negative	1	0	0
Google Play Store	6168fe77-ac18-433b-818f-d3af749443a7	Good	Targ Ali	##########			0	ar	us		4	ar	good	Positive	0	0	0
Google Play Store	7d4dfe98-b4df-4c44-9605-2473a73443cb	Very very very bad.. A terrible update means I can't access my account and all my work is halted. Please solve this problem as soon as possible.	Abdullah Mohammd	##########	عميلنا العزيز، يؤسفنا سماع ذلك ونأمل منك التواصل معنا على الرقم 8001242225 أو من خلال البريد الإلكتروني info@riyadbank.com و تزويدنا بملاحظاتك لنتمكن من خدمتك بشكل أفضل.	##########	0	ar	us		1	ar	bad terrible update mean cant access account work halt please solve problem soon possible	Negative	1	1	0
Google Play Store	bd463139-fbbf-4bf4-8e8a-91ba470a1484	Good	Moqtda Alhajji	##########			0	ar	us		5	ar	good	Positive	0	0	0
Google Play Store	7d2680fb-6a1c-4fc3-aa7c-10b69991fbd2	Good.	فيصل العمري	##########			0	ar	us		5	ar	good	Positive	0	0	0
Google Play Store	b3b29f6e-36e8-47be-abf1-78c739042941	The application has become unable to access the account after the update.	abdulaziz fahad	##########	عميلنا العزيز، نأمل منك تزويدنا بالملاحظة التي تواجهك عبر البريد الإلكتروني info@riyadbank.com أو يمكنك التواصل معنا على الرقم 8001242225 لنتمكن من خدمتك.	##########	2	ar	us		1	ar	application become unable access account update	Negative	0	1	0
Google Play Store	8f7e42ae-c30f-449c-9dd1-7708563871d5	It is bad after the update. Sometimes it opens and ten times it does not ask for website activation. I activate the website and give it permissions and everything, but it still doesn't work. It has become the worst application among banks, while it used to be the best.	المصلوخي بن محمد	##########	عميلنا العزيز، نأسف لسماع ذلك ونأمل منك تزويدنا بالملاحظة التي تواجهك عبر البريد الإلكتروني info@riyadbank.com أو يمكنك التواصل معنا على الرقم 8001242225 لنتمكن من خدمتك.	##########	5	ar	us		1	ar	bad update sometimes open ten time ask website activation activate website give permissions everything still doesnt work become bad application among bank use best	Negative	1	1	0
Google Play Store	9396a410-1712-4d7e-b35d-ff67d591f3a9	Difficult	أسماء السليمان	##########	عميلنا العزيز، نأمل منك تزويدنا بالملاحظة التي تواجهك عبر البريد الإلكتروني info@riyadbank.com أو يمكنك التواصل معنا على الرقم 8001242225 لنتمكن من خدمتك.	##########	0	ar	us		2	ar	difficult	Neutral	1	0	0
Google Play Store	c637510b-0cf7-4e45-80b7-f7179f9dfa33	Beauty	Bo Baqer Alhijji	##########			0	ar	us		5	ar	beauty	Positive	0	0	0
Google Play Store	c49f66a8-c47e-4aae-8d67-38b6d9743b9d	Very bad, cannot continue working.	Ahmed Abd El Fatah	##########	عميلنا العزيز، نأسف لسماع ذلك ونأمل منك تزويدنا بالملاحظة التي تواجهك عبر البريد الإلكتروني info@riyadbank.com أو يمكنك التواصل معنا على الرقم 8001242225 لنتمكن من خدمتك.	##########	0	ar	us		1	ar	bad continue work	Negative	1	1	0
Google Play Store	083fd354-318b-4aa6-a74d-daa758ef8ae0	After the update, it became very bad. It hangs and does not open, and the authentication password, if entered on the website, refuses to send. Please solve the problem quickly so that I do not have to change the bank.	دلال العلاطي	##########	عميلنا العزيز، نأسف لسماع ذلك ونأمل منك تزويدنا بالملاحظة التي تواجهك عبر البريد الإلكتروني info@riyadbank.com أو يمكنك التواصل معنا على الرقم 8001242225 لنتمكن من خدمتك.	##########	0	ar	us		1	ar	update become bad hang open authentication password enter website refuse send please solve problem quickly change bank	Negative	1	1	1
Google Play Store	5808c78f-2d61-4b16-a0af-b28ffc7766d3	Very good.	علي الدرهمي	##########			0	ar	us		4	ar	good	Positive	0	0	0
Google Play Store	5645154d-f410-43f9-9e2e-c513c63ed6ba	Correct until now and has no problems.	مستخدم Google	##########			0	ar	us		4	ar	correct problems	Neutral	0	1	0
Google Play Store	26df4611-42e4-44ef-a8d0-eccbeba97f1e	The problem is that we cannot clean a beneficiary, it doubles the numbers and letters. Frankly, we are tired of this problem since the updates started.	naser Al haje	##########	عميلنا العزيز، نأمل منك تزويدنا بالملاحظة التي تواجهك عبر البريد الإلكتروني info@riyadbank.com أو يمكنك التواصل معنا على الرقم 8001242225 لنتمكن من خدمتك.	##########	0	ar	us		1	ar	problem clean beneficiary double number letter frankly tire problem since update start	Negative	0	1	0
Google Play Store	ca432ed2-3be8-44ff-a3fb-c067a1f1b5a8	A fantastic application.	جواد علي	##########			0	ar	us		5	ar	fantastic application	Positive	0	0	0
Google Play Store	a7a74f18-9315-4d86-85d4-856f2c7cd185	Translation failed or invalid response format.	‪Sgf (‫آعمآل حرة٠٠٩٦٧٧٨٠٥٨١٩٨٢‬‎)‬‏	##########			0	ar	us		3	ar	translation fail invalid response format	Negative	1	1	0
Google Play Store	70469f65-d78b-4406-89c7-efc9ab341ddf	Please inform my account at Al Riyadh Bank and take a rest.	abrag alreef	##########	عميلنا العزيز، يؤسفنا سماع ذلك ونأمل منك التواصل معنا على الرقم 8001242225 أو من خلال البريد الإلكتروني info@riyadbank.com و تزويدنا بملاحظاتك لنتمكن من خدمتك بشكل أفضل.	##########	0	ar	us		1	ar	please inform account al riyadh bank take rest	Neutral	0	0	0
Google Play Store	0b04b6a5-96c2-4f76-b945-809f83f367e4	Nice application	عازف الاحزااان	##########			0	ar	us		5	ar	nice application	Positive	0	0	0
Google Play Store	24511120-9236-4a94-b787-edcc60a75f88	The fingerprint doesn't work. I'm trying to press on the fingerprint screen but nothing happens.	Abdulqudous s	##########	عميلنا العزيز، نأمل منك التواصل معنا على الرقم 8001242225 أو من خلال البريد الإلكتروني info@riyadbank.com و تزويدنا بملاحظاتك لنتمكن من خدمتك بشكل أفضل.	##########	3	ar	us		1	ar	fingerprint doesnt work im try press fingerprint screen nothing happen	Negative	0	1	0
Google Play Store	a545fc84-a0e4-4660-89bb-8c2f4d677e38	Very bad, he always talks solely about money. He is basically interested in nothing else.	اميره العنزي	##########	عميلنا العزيز، يؤسفنا سماع ذلك ونأمل منك التواصل معنا على الرقم 8001242225 أو من خلال البريد الإلكتروني info@riyadbank.com و تزويدنا بملاحظاتك لنتمكن من خدمتك بشكل أفضل.	##########	0	ar	us		1	ar	bad always talk solely money basically interest nothing else	Negative	1	0	0
Google Play Store	56afaa04-e4e6-4789-8ccb-2f7aaa2e0d85	The application is very wonderful, practical, and easy, but there is a problem with logging in when the fingerprint is activated. It has been more than two weeks.	يوسف نصر	##########	عميلنا العزيز، نأمل منك التواصل معنا على الرقم 8001242225 أو من خلال البريد الإلكتروني info@riyadbank.com و تزويدنا بملاحظاتك لنتمكن من خدمتك بشكل أفضل.	##########	0	ar	us		4	ar	application wonderful practical easy problem log fingerprint activate two weeks	Negative	0	1	0
Google Play Store	5b1368e3-53f8-4e13-a604-b4f7ad5a992a	Very very very very very very wonderful.	خالد الشريف	##########			0	ar	us		5	ar	wonderful	Positive	0	0	0
Google Play Store	788ee32b-ef44-4d16-a58c-d582a0890c32	A very, very excellent application, 100/100 OK.	Mhmd22 MB	##########			0	ar	us		5	ar	excellent application ok	Positive	0	0	0
Google Play Store	63aa4dc3-9d91-497e-8b4c-a554521fea1e	It doesn't work very well compared to Al-Ahli and Al-Rajhi.	خالد ابو عمرو	##########	عميلنا العزيز، يؤسفنا سماع ذلك ونأمل منك التواصل معنا على الرقم 8001242225 أو من خلال البريد الإلكتروني info@riyadbank.com و تزويدنا بملاحظاتك لنتمكن من خدمتك بشكل أفضل.	##########	0	ar	us		1	ar	doesnt work well compare alahli alrajhi	Negative	0	1	0
Google Play Store	b5920538-195e-4dac-8fee-329d4544879c	The application is the worst and ineffective, update the application, oh Riyadh Bank and add a functioning application.	محند الحمود	##########	عميلنا العزيز، يؤسفنا سماع ذلك ونأمل منك التواصل معنا على الرقم 8001242225 أو من خلال البريد الإلكتروني info@riyadbank.com و تزويدنا بملاحظاتك لنتمكن من خدمتك بشكل أفضل.	##########	0	ar	us		1	ar	application bad ineffective update application oh riyadh bank add function application	Negative	1	0	0
Google Play Store	9870260f-0dd4-4ca1-a95f-128223772392	The worst program that Arafat has ever known.	عيسى صلح	##########	عميلنا العزيز، يؤسفنا سماع ذلك ونأمل منك التواصل معنا على الرقم 8001242225 أو من خلال البريد الإلكتروني info@riyadbank.com و تزويدنا بملاحظاتك لنتمكن من خدمتك بشكل أفضل.	##########	0	ar	us		1	ar	bad program arafat ever know	Negative	1	0	0
Google Play Store	408de28f-d746-4376-b53a-4db12ba14fef	Excellent	أبو زهراء Z	##########			0	ar	us		5	ar	excellent	Positive	0	0	0
Google Play Store	14a95f20-b54b-4c10-af2c-8ad9d86b25d1	Excellent.	موسى هوساوي	##########			0	ar	us		5	ar	excellent	Positive	0	0	0
Google Play Store	d00a718b-91bc-4d86-a847-9443852ef525	Excellent application	kالدببه الثلاثه	##########			0	ar	us		5	ar	excellent application	Positive	0	0	0
Google Play Store	d8e44893-6d5d-49f0-bc94-7de45032cdf8	"Yameen billah, a trashy application in every sense of the word."	Dark Prince	##########	عميلنا العزيز، نأسف لسماع ذلك ونأمل منك تزويدنا بالملاحظة التي تواجهك عبر البريد الإلكتروني info@riyadbank.com أو يمكنك التواصل معنا على الرقم 8001242225 لنتمكن من خدمتك.	##########	0	ar	us		1	ar	yameen billah trashy application every sense word	Negative	1	0	0
Google Play Store	f016732c-8024-4305-a019-b8081f503eae	It is very important to change the password every time. Otherwise, the application won't function properly.	hanoo hano	##########	عميلنا العزيز، يؤسفنا سماع ذلك ونأمل منك التواصل معنا على الرقم 8001242225 أو من خلال البريد الإلكتروني info@riyadbank.com و تزويدنا بملاحظاتك لنتمكن من خدمتك بشكل أفضل.	##########	0	ar	us		1	ar	important change password every time otherwise application wont function properly	Neutral	0	1	0
Google Play Store	7f23631e-e3e6-4495-acda-bb7d0278a981	The application is not working, it is asking me to activate the location.	Ag Dd	##########	عميلنا العزيز، يؤسفنا سماع ذلك ونأمل منك التواصل معنا على الرقم 8001242225 أو من خلال البريد الإلكتروني info@riyadbank.com و تزويدنا بملاحظاتك لنتمكن من خدمتك بشكل أفضل.	##########	1	ar	us		1	ar	application work ask activate location	Negative	0	1	0
Google Play Store	a33eba7e-0f1f-40dc-b63f-594c5b66b877	Excellent	Rabih Elahmad	##########			0	ar	us		5	ar	excellent	Positive	0	0	0
Google Play Store	c5582b78-4dcf-408f-b5a4-49f5665f80c7	Opening the application has become difficult after the update, the keyboard refuses to function in order to type the code, and every time it requires reactivating the fingerprint. Please fix the errors.	ياسر اليماني	##########	عميلنا العزيز، نأمل منك التواصل معنا على الرقم 8001242225 أو من خلال البريد الإلكتروني info@riyadbank.com و تزويدنا بملاحظاتك لنتمكن من خدمتك بشكل أفضل.	##########	1	ar	us		2	ar	open application become difficult update keyboard refuse function order type code every time require reactivate fingerprint please fix errors	Negative	1	1	0
Google Play Store	d37e1305-9e36-4f66-82b3-e79de7d0f545	Same problems as everyone else, requested access to the website and was granted permission to access it, but it's not working. Terrible application, worst bank, it lacks technical capabilities 😕	موسى الكناني	##########	عميلنا العزيز، يؤسفنا سماع ذلك ونأمل منك التواصل معنا على الرقم 8001242225 أو من خلال البريد الإلكتروني info@riyadbank.com و تزويدنا بملاحظاتك لنتمكن من خدمتك بشكل أفضل.	##########	4	ar	us		1	ar	problems everyone else request access website grant permission access work terrible application bad bank lack technical capabilities	Negative	1	1	0
Google Play Store	db0f69ae-4f3b-41e6-b5d2-e9840eb301df	Freeship	لول 07	##########			0	ar	us		5	ar	freeship	Neutral	0	0	0
Google Play Store	8aa15c8b-3335-41ab-afc7-ebcfb6c2ced6	Dear Riyadh Bank, there is a problem with the website.	فيصل لسم	##########	عميلنا العزيز، نأمل منك التواصل معنا على الرقم 8001242225 أو من خلال البريد الإلكتروني info@riyadbank.com و تزويدنا بملاحظاتك لنتمكن من خدمتك بشكل أفضل.	##########	0	ar	us		3	ar	dear riyadh bank problem website	Negative	1	0	0
Google Play Store	a2c83394-b549-460f-9a4d-c4fd08401612	Good	Ghoraibi	##########			0	ar	us		3	ar	good	Positive	0	0	0
Google Play Store	5d92b2aa-88ea-4e98-a7be-5543d36980e6	He has many problems and honestly, it is not good, it is bad.	aa2000 Sd	##########	عميلنا العزيز، يؤسفنا سماع ذلك ونأمل منك التواصل معنا على الرقم 8001242225 أو من خلال البريد الإلكتروني info@riyadbank.com و تزويدنا بملاحظاتك لنتمكن من خدمتك بشكل أفضل.	##########	0	ar	us		1	ar	many problems honestly good bad	Negative	1	0	0
Google Play Store	c36669fb-c2d6-47bc-b9d4-51ec52207316	The request to delete the old application is being made even though it has been less than 6 months since it was installed. The new application is being continuously installed, in addition to not adding a new account among the options. Many services are not available.	ثريا سلا	##########	عميلنا العزيز، نأمل منك التواصل معنا على الرقم 8001242225 أو من خلال البريد الإلكتروني info@riyadbank.com و تزويدنا بملاحظاتك لنتمكن من خدمتك بشكل أفضل.ظ	##########	0	ar	us		2	ar	request delete old application make even though less months since instal new application continuously instal addition add new account among options many service available	Negative	0	1	0
Google Play Store	f413eeac-2b88-45c9-8fea-a1e71dac37d7	It doesn't work for me after the modification. It asks for site permission and then refuses. There is a lot of confusion.	منال القحطاني	##########	عميلنا العزيز، نأمل منك التواصل معنا على الرقم 8001242225 أو من خلال البريد الإلكتروني info@riyadbank.com و تزويدنا بملاحظاتك لنتمكن من خدمتك بشكل أفضل.	##########	1	ar	us		1	ar	doesnt work modification ask site permission refuse lot confusion	Negative	0	1	0
Google Play Store	110f107d-f22e-444d-87db-e92edb1b6cf6	Very good.	AA aa	##########			0	ar	us		5	ar	good	Positive	0	0	0
Google Play Store	bbd6da10-8fad-499f-8e58-427aaf10cf8c	The worst application ever among other banking applications, after the latest update, it is impossible to access my account at Bank Al Riyadh. From bad to worse.	Uhhb Tvv	##########	عميلنا العزيز، يؤسفنا سماع ذلك ونأمل منك التواصل معنا على الرقم 8001242225 أو من خلال البريد الإلكتروني info@riyadbank.com و تزويدنا بملاحظاتك لنتمكن من خدمتك بشكل أفضل.	##########	1	ar	us		1	ar	bad application ever among bank applications late update impossible access account bank al riyadh bad bad	Negative	1	1	0
Google Play Store	a87ed2a3-ba25-4257-b77e-32d869dcbeb0	nice, but I hope it improves to be as easy as Rajhi.	Hnana Sohijkl	##########	عميلنا العزيز، نأمل منك التواصل معنا على الرقم 8001242225 أو من خلال البريد الإلكتروني info@riyadbank.com و تزويدنا بملاحظاتك لنتمكن من خدمتك بشكل أفضل.	##########	1	ar	us		5	ar	nice hope improve easy rajhi	Positive	0	0	0
Google Play Store	cbd7438f-6d5b-452e-81ed-558b4c0ba3e2	"The worst update ever happened in history and the reason is that the customer is unable to access their account."	thzhaahg al	##########	عميلنا العزيز، يؤسفنا سماع ذلك ونأمل منك التواصل معنا على الرقم 8001242225 أو من خلال البريد الإلكتروني info@riyadbank.com و تزويدنا بملاحظاتك لنتمكن من خدمتك بشكل أفضل.	##########	0	ar	us		1	ar	bad update ever happen history reason customer unable access account	Negative	1	1	0
Google Play Store	7cdf4a4d-4eee-4646-8852-1470de8f3614	The application is out of service.	emad alghamdi	##########	عميلنا العزيز، نأمل منك التواصل معنا على الرقم 8001242225 أو من خلال البريد الإلكتروني info@riyadbank.com و تزويدنا بملاحظاتك لنتمكن من خدمتك بشكل أفضل.	##########	0	ar	us		1	ar	application service	Negative	0	1	0
Google Play Store	48c09d98-dac4-4166-bc46-9e78703cce89	A very bad program. I enter the password and name, and incorrect data appears to me.	mohamed said	##########	عميلنا العزيز، يؤسفنا سماع ذلك ونأمل منك التواصل معنا على الرقم 8001242225 أو من خلال البريد الإلكتروني info@riyadbank.com و تزويدنا بملاحظاتك لنتمكن من خدمتك بشكل أفضل.	##########	0	ar	us		1	ar	bad program enter password name incorrect data appear	Negative	1	1	0
Google Play Store	2add2f3c-84d3-4cac-b3f1-7c90b4ea1451	With all honesty, the worst banking application.. Every update brings along problems.. Unfortunately..	abu gazee	##########	عميلنا العزيز، يؤسفنا سماع ذلك ونأمل منك التواصل معنا على الرقم 8001242225 أو من خلال البريد الإلكتروني info@riyadbank.com و تزويدنا بملاحظاتك لنتمكن من خدمتك بشكل أفضل.	##########	1	ar	us		1	ar	honesty bad bank application every update bring along problems unfortunately	Negative	1	0	0
Google Play Store	d2d7b8b8-897c-4870-a6e6-a91de31b108a	Many problems, suddenly cancels fingerprints, the location.	Muhannad	##########	عميلنا العزيز، نأسف لسماع ذلك ونأمل منك تزويدنا بالملاحظة التي تواجهك عبر البريد الإلكتروني info@riyadbank.com أو يمكنك التواصل معنا على الرقم 8001242225 لنتمكن من خدمتك.	##########	2	ar	us		1	ar	many problems suddenly cancel fingerprint location	Negative	0	1	0
Google Play Store	461efaa0-815e-4740-81c1-5535f45d9e78	The application is excellent, Mashallah, Tabarakallah.	Fahad Alqatari	##########			1	ar	us		5	ar	application excellent mashallah tabarakallah	Positive	0	0	0
Google Play Store	12b75f75-50b6-4b05-b12a-6d2200383069	Poor service when trying to open an account through the app, it gets rejected and redirects you to the Poki app to force you to subscribe to it. Then the bank tells you that the employee cannot open an online account for you, so go to another bank.	Saddam Hassan	##########	عميلنا العزيز، نأسف لسماع ذلك ونأمل منك تزويدنا بالملاحظة التي تواجهك عبر البريد الإلكتروني info@riyadbank.com أو يمكنك التواصل معنا على الرقم 8001242225 لنتمكن من خدمتك.	##########	0	ar	us		1	ar	poor service try open account app get reject redirect poki app force subscribe bank tell employee open online account go another bank	Negative	1	1	0
Google Play Store	32784b41-0883-4682-98ad-dd98c3b98988	Excellent, but there is a problem.	‪ABUSAOUD “ABUSAOUD1991” ABUSAOUD‬‏	##########	عميلنا العزيز، نأمل منك تزويدنا بالملاحظة التي تواجهك عبر البريد الإلكتروني info@riyadbank.com أو يمكنك التواصل معنا على الرقم 8001242225 لنتمكن من خدمتك.	##########	0	ar	us		5	ar	excellent problem	Negative	0	0	0
Google Play Store	0fcbbe79-2a85-4b95-9e45-636a6d2fcba1	Excellent	منيع البيشي	##########			0	ar	us		5	ar	excellent	Positive	0	0	0
Google Play Store	9919108f-5459-41a1-bc4c-3c771484c64c	We kindly request the company to provide us with information because we are experiencing a problem accessing the application and the issue is with the Mirda website not functioning.	رياض الجعمي	##########	عميلنا العزيز، نأمل منك تزويدنا بالملاحظة التي تواجهك عبر البريد الإلكتروني info@riyadbank.com أو يمكنك التواصل معنا على الرقم 8001242225 لنتمكن من خدمتك.	##########	0	ar	us		5	ar	kindly request company provide us information experience problem access application issue mirda website function	Negative	0	1	0
Google Play Store	4f3efbf3-a6fd-4fd7-addc-d06a6d6a7d87	"Very bad and heavy application, not suitable to be a car wash application. How can it be a banking application? With all due respect to every honorable profession, why should I communicate with you? The speech and evaluation are clear."	فهد am	##########	عميلنا العزيز، نأسف لسماع ذلك ونأمل منك تزويدنا بالملاحظة التي تواجهك عبر البريد الإلكتروني info@riyadbank.com أو يمكنك التواصل معنا على الرقم 8001242225 لنتمكن من خدمتك.	##########	1	ar	us		1	ar	bad heavy application suitable car wash application bank application due respect every honorable profession communicate speech evaluation clear	Negative	1	0	1
Google Play Store	c14da435-3499-4ca3-bf5f-35f4916f2ac8	Easy and beautiful	عبدالله ال سليمان	##########			0	ar	us		5	ar	easy beautiful	Positive	0	0	0
Google Play Store	b62c8bfe-81b9-474c-aec5-128395872a5a	I have a current account and I received a check deposit, and the amount is available in the account. However, my ATM card has been blocked, and they told me to visit the branch.	ناصر الذيابي	##########	عميلنا العزيز، نأمل منك التواصل معنا على الرقم 8001242225 أو من خلال البريد الإلكتروني info@riyadbank.com و تزويدنا بملاحظاتك لنتمكن من خدمتك بشكل أفضل.	##########	1	ar	us		1	ar	current account receive check deposit amount available account however atm card block tell visit branch	Neutral	0	1	0
Google Play Store	62faf07b-7c75-42c9-8614-a37d27fde4c2	It was good.	ahmad nawar	##########	عميلنا العزيز، يؤسفنا سماع ذلك ونأمل منك التواصل معنا على الرقم 8001242225 أو من خلال البريد الإلكتروني info@riyadbank.com و تزويدنا بملاحظاتك لنتمكن من خدمتك بشكل أفضل.	##########	2	ar	us		1	ar	good	Positive	0	0	0
Google Play Store	ffda0bf6-d4fe-434c-b16b-6ab8836c87f7	I wish you would cancel the website's inconvenience. It's not reasonable that every time I need to access the program, I have to activate the website's services.	AHMAD ALI	##########	عميلنا العزيز، نأمل منك التواصل معنا على الرقم 8001242225 أو من خلال البريد الإلكتروني info@riyadbank.com و تزويدنا بملاحظاتك لنتمكن من خدمتك بشكل أفضل.	##########	1	ar	us		3	ar	wish would cancel websites inconvenience reasonable every time need access program activate websites service	Negative	1	1	0
Google Play Store	649f5a43-e615-470f-aed2-b90138c4e730	Very beautiful and excellent.	مطيع المعنه	##########			1	ar	us		5	ar	beautiful excellent	Positive	0	0	0
Google Play Store	850958de-e1b5-42bc-a039-a7d697a8202f	Money, money	اسماعيل العنزي	##########			0	ar	us		5	ar	money money	Neutral	0	0	0
Google Play Store	1655d82b-5bee-4968-a138-0b6cf148d7cc	Very, very bad. Please fix the problem as soon as possible.	أبو عبدالله ١١	##########	عميلنا العزيز، يؤسفنا سماع ذلك ونأمل منك التواصل معنا على الرقم 8001242225 أو من خلال البريد الإلكتروني info@riyadbank.com و تزويدنا بملاحظاتك لنتمكن من خدمتك بشكل أفضل.	##########	2	ar	us		1	ar	bad please fix problem soon possible	Negative	1	0	0
Google Play Store	f551b17d-665e-4527-9e68-0623eba7a730	It became extremely bad after the update.	soliman ahmed	##########	Dear customer, kindly provide us your experience for better assistance, and please contact with us at 8001242225 or info@riyadbank.com and we will be happy to serve you.	##########	1	ar	us		1	ar	become extremely bad update	Negative	1	0	0
Google Play Store	f60b9805-987f-493b-969e-52c25e858d88	The latest updates are very bad, and there is no progress. It is difficult to access the website after entering the information, it does not respond, and many things are not working properly.	احمد محمد	##########	عميلنا العزيز، يؤسفنا سماع ذلك ونأمل منك التواصل معنا على الرقم 8001242225 أو من خلال البريد الإلكتروني info@riyadbank.com و تزويدنا بملاحظاتك لنتمكن من خدمتك بشكل أفضل.	##########	37	ar	us		2	ar	late update bad progress difficult access website enter information respond many things work properly	Negative	1	1	0
Google Play Store	629bd1ec-9649-47d0-b023-25f38e576779	nice	بليغ المليكي	##########			0	ar	us		5	ar	nice	Positive	0	0	0
Google Play Store	73ff2e07-3545-44c3-8dfc-86cc9071354b	If I access it, it asks for the location and doesn't work properly with me. If I open it, please fix it as soon as possible, as I will switch to other banks.	Banen Al fahdel	##########	عميلنا العزيز، يؤسفنا سماع ذلك ونأمل منك التواصل معنا على الرقم 8001242225 أو من خلال البريد الإلكتروني info@riyadbank.com و تزويدنا بملاحظاتك لنتمكن من خدمتك بشكل أفضل.	##########	0	ar	us		1	ar	access ask location doesnt work properly open please fix soon possible switch bank	Negative	0	1	0
Google Play Store	68fb5873-8aad-4e3c-9ac5-bc3cbf93d49a	After the new update, the application is failing. Now there is a problem with the transfers, it doesn't perform any transfers and I can't give it a star.	ali ahmad bushgja	##########	عميلنا العزيز، يؤسفنا سماع ذلك ونأمل منك التواصل معنا على الرقم 8001242225 أو من خلال البريد الإلكتروني info@riyadbank.com و تزويدنا بملاحظاتك لنتمكن من خدمتك بشكل أفضل.	##########	0	ar	us		1	ar	new update application fail problem transfer doesnt perform transfer cant give star	Negative	0	1	0
Google Play Store	e95ac998-56fe-4a25-a3fd-b8c1a1c3d6c7	The operation is not good by any means.	Ali Anliyatou	##########	عميلنا العزيز، نأمل منك التواصل معنا على الرقم 8001242225 أو من خلال البريد الإلكتروني info@riyadbank.com و تزويدنا بملاحظاتك لنتمكن من خدمتك بشكل أفضل.	##########	1	ar	us		5	ar	operation good mean	Negative	1	0	0
Google Play Store	aa3c6b2d-164d-4808-b566-c3d96965224c	Done.	ابومفرح العاصمي	##########			0	ar	us		3	ar	do	Neutral	0	1	0
Google Play Store	3c19c561-2e57-4ef0-b613-d025ffd7a536	I was trying to open a new account and activate the website, but there was no use at all even after activation. Please fix the issue so that we can access smoothly and easily without any complications. Thank you.	دودو	##########	عميلنا العزيز، نأمل منك التواصل معنا على الرقم 8001242225 أو من خلال البريد الإلكتروني info@riyadbank.com و تزويدنا بملاحظاتك لنتمكن من خدمتك بشكل أفضل.	##########	2	ar	us		1	ar	try open new account activate website use even activation please fix issue access smoothly easily without complications thank	Negative	0	1	0
Google Play Store	da8a659c-7d3f-4505-8eb9-ee779d97f216	Very excellent	Ali Al Ali	##########			0	ar	us		5	ar	excellent	Positive	0	0	0
Google Play Store	fdf1b597-a413-4579-87b6-d3415eb6951b	I keep trying to access my Riyadh Bank account, but the application does not open. How many times have I tried and failed to access it?	ابو حمد	##########	عميلنا العزيز، نأمل منك التواصل معنا على الرقم 8001242225 أو من خلال البريد الإلكتروني info@riyadbank.com و تزويدنا بملاحظاتك لنتمكن من خدمتك بشكل أفضل.	##########	0	ar	us		1	ar	keep try access riyadh bank account application open many time try fail access	Negative	0	1	0
Google Play Store	a144609d-5f76-4480-844e-fd84e114f0e9	Very good	محمد عبد الحافظ	##########			0	ar	us		5	ar	good	Positive	0	0	0
Google Play Store	bffe4151-81e3-4827-bed1-fc058df08751	Okay / Everything is fine	Terminator z	##########			0	ar	us		5	ar	okay everything fine	Positive	0	0	0
Google Play Store	f6b3b079-79d5-453e-9fad-980c0f292934	The new update prevents access, please provide a solution to the problem.	رفعه الدوسري	2023-04-09 01:51:00	عميلنا العزيز، يؤسفنا سماع ذلك ونأمل منك التواصل معنا على الرقم 8001242225 أو من خلال البريد الإلكتروني info@riyadbank.com و تزويدنا بملاحظاتك لنتمكن من خدمتك بشكل أفضل.	##########	0	ar	us		1	ar	new update prevent access please provide solution problem	Negative	0	1	0
Google Play Store	5fe976f4-3283-4c5d-b86f-bc8024eda788	The application often freezes and does not work, especially during non-working hours and weekends.	Ali Al-Bin Saad	##########	عميلنا العزيز، يؤسفنا سماع ذلك ونأمل منك التواصل معنا على الرقم 8001242225 أو من خلال البريد الإلكتروني info@riyadbank.com و تزويدنا بملاحظاتك لنتمكن من خدمتك بشكل أفضل.	##########	1	ar	us		3	ar	application often freeze work especially nonworking hours weekend	Negative	0	1	1
Google Play Store	5c3f6a19-0920-4fed-b05c-fbb9434b13a4	The application is not working, and we cannot login. Don't tell us to send an email or call the toll-free number. Check your application and see what the problem is. Everyone is complaining about the same issue.	Haney Alteganey	##########	عميلنا العزيز، يؤسفنا سماع ذلك ونأمل منك التواصل معنا على الرقم 8001242225 أو من خلال البريد الإلكتروني info@riyadbank.com و تزويدنا بملاحظاتك لنتمكن من خدمتك بشكل أفضل.	##########	0	ar	us		1	ar	application work login dont tell us send email call tollfree number check application see problem everyone complain issue	Negative	0	1	0
Google Play Store	26f05d12-ee07-4f96-a11e-1ccc5959ca79	Excellent	حساب خاص	##########			0	ar	us		5	ar	excellent	Positive	0	0	0
Google Play Store	f6a906e3-a91c-4db7-a327-40034f4af4d8	The application refused access.	SAMI LAHAAM	##########	عميلنا العزيز، نأمل منك التواصل معنا على الرقم 8001242225 أو من خلال البريد الإلكتروني info@riyadbank.com و تزويدنا بملاحظاتك لنتمكن من خدمتك بشكل أفضل.	2023-04-08 04:15:00	0	ar	us		2	ar	application refuse access	Negative	0	1	0
Google Play Store	c4f6500d-83fd-449c-9a65-a7fd79c95b49	Thank you, the transfer issue has been resolved and the beneficiary has been added. 👍	Majdi Alattas	2023-04-07 09:07:00	عميلنا العزيز، العفو ونسعد بخدمتك دوماً.	2023-04-08 04:15:00	0	ar	us		4	ar	thank transfer issue resolve beneficiary add	Positive	0	1	0
Google Play Store	586e2de9-1ffe-4d0f-ac54-e3ff80a20130	"The application is not opening, you fix one thing and break a thousand other things... and even your response is just a copy-paste."	suliman thabet	2023-04-07 08:04:00	عميلنا العزيز، يؤسفنا سماع ذلك ونأمل منك التواصل معنا على الرقم 8001242225 أو من خلال البريد الإلكتروني info@riyadbank.com و تزويدنا بملاحظاتك لنتمكن من خدمتك بشكل أفضل.	2023-04-06 04:06:00	0	ar	us		1	ar	application open fix one thing break thousand things even response copypaste	Negative	0	1	0
Google Play Store	92911798-0954-470c-9a85-f7de022c0483	I cannot open the application.	محمد البلوي	2023-04-07 04:49:00	عميلنا العزيز، نأمل منك التواصل معنا على الرقم 8001242225 أو من خلال البريد الإلكتروني info@riyadbank.com و تزويدنا بملاحظاتك لنتمكن من خدمتك بشكل أفضل.	2023-04-08 04:14:00	0	ar	us		5	ar	open application	Negative	0	1	0
Google Play Store	de49449e-9604-4d95-bbad-4bf33a93927a	The latest update of the application is a failed, failed, failed, and does not even deserve a quarter star.	ابو عبدالعزيز	##########	عميلنا العزيز، يؤسفنا سماع ذلك ونأمل منك التواصل معنا على الرقم 8001242225 أو من خلال البريد الإلكتروني info@riyadbank.com و تزويدنا بملاحظاتك لنتمكن من خدمتك بشكل أفضل.	2023-04-08 04:13:00	0	ar	us		1	ar	late update application fail fail fail even deserve quarter star	Negative	1	1	0
Google Play Store	efe93bde-2d0b-4921-8e7b-546cd0b9ae5c	Trash application	typically qonty	##########	عميلنا العزيز، نأسف لسماع ذلك ونأمل منك تزويدنا بالملاحظة التي تواجهك عبر البريد الإلكتروني info@riyadbank.com أو يمكنك التواصل معنا على الرقم 8001242225 لنتمكن من خدمتك.	2023-04-08 04:13:00	0	ar	us		1	ar	trash application	Negative	1	0	0
Google Play Store	2b795cbd-8455-4c75-9dae-bfe133035cb8	Excellent very much	بدر الدين يوسف كامل	##########			0	ar	us		5	ar	excellent much	Positive	0	0	0
Google Play Store	d60eb20d-c7ad-478a-a022-3473ce6350ae	There are some problems.	Mohammed Elfaioumy	##########	عميلنا العزيز، نأمل منك تزويدنا بالملاحظة التي تواجهك عبر البريد الإلكتروني info@riyadbank.com أو يمكنك التواصل معنا على الرقم 8001242225 لنتمكن من خدمتك.	2023-04-08 04:11:00	0	ar	us		5	ar	problems	Negative	0	1	0
Google Play Store	af8028a2-3bc3-4a97-86af-284e1f2edcae	The same problem again, the website, and who knows what the website is.	Meme Bobo	##########	عميلنا العزيز، نأمل منك تزويدنا بالملاحظة التي تواجهك عبر البريد الإلكتروني info@riyadbank.com أو يمكنك التواصل معنا على الرقم 8001242225 لنتمكن من خدمتك.	2023-04-08 04:10:00	0	ar	us		1	ar	problem website know website	Negative	1	1	0
Google Play Store	4cfdc4f3-740b-4e36-916e-b62ef51ae9d9	There is a recent problem with accessing the application through fingerprint.	mahmoud fatah	##########	عميلنا العزيز، نأمل منك تزويدنا بالملاحظة التي تواجهك عبر البريد الإلكتروني info@riyadbank.com أو يمكنك التواصل معنا على الرقم 8001242225 لنتمكن من خدمتك.	2023-04-08 04:10:00	0	ar	us		3	ar	recent problem access application fingerprint	Negative	0	1	0
Google Play Store	5f5994ad-5253-48f4-aef9-38a46c4cb9a6	It requests the geolocation permission, and after activation, it requests permission again.	حسين محمد	2023-04-06 07:33:00	عميلنا العزيز، نأمل منك تزويدنا بالملاحظة التي تواجهك عبر البريد الإلكتروني info@riyadbank.com أو يمكنك التواصل معنا على الرقم 8001242225 لنتمكن من خدمتك.	2023-04-08 04:09:00	0	ar	us		1	ar	request geolocation permission activation request permission	Neutral	0	1	0
Google Play Store	44367993-358b-4b76-8d8e-58fe76271145	With the new update, the financial transfers icon disappeared for me. Is there a solution for this? I hope to be assisted.	عبدالمنعم ابراهيم	##########	عميلنا العزيز، نأمل منك التواصل معنا على الرقم 8001242225 أو من خلال البريد الإلكتروني info@riyadbank.com و تزويدنا بملاحظاتك لنتمكن من خدمتك بشكل أفضل.	2023-04-06 04:08:00	1	ar	us		1	ar	new update financial transfer icon disappear solution hope assist	Negative	0	1	0
Google Play Store	284e28fa-6632-4d77-bf8a-06918c76dff0	Bad	احمد ابو كنان	##########	عميلنا العزيز، يؤسفنا سماع ذلك ونأمل منك التواصل معنا على الرقم 8001242225 أو من خلال البريد الإلكتروني info@riyadbank.com و تزويدنا بملاحظاتك لنتمكن من خدمتك بشكل أفضل.	2023-04-06 04:08:00	0	ar	us		3	ar	bad	Neutral	1	0	0
Google Play Store	d4a4619f-9038-4bb9-a091-58051207c9b0	They should enhance the program like other applications such as Al Rajhi's application. They have multiple services. So you can even make purchases.	ابو فراس	##########	عميلنا العزيز، نأمل منك التواصل معنا على الرقم 8001242225 أو من خلال البريد الإلكتروني info@riyadbank.com و تزويدنا بملاحظاتك لنتمكن من خدمتك بشكل أفضل.	2023-04-06 04:08:00	2	ar	us		2	ar	enhance program like applications al rajhis application multiple service even make purchase	Positive	0	1	0
Google Play Store	76c3ce89-3e82-4b8a-834d-794c6fb480ec	There are many malfunctions and it is not possible to access the application after logging in and receiving the temporary code. It does not respond, and the numeric keypad does not appear to complete the login process.	ridha jafaar	##########	عميلنا العزيز، يؤسفنا سماع ذلك ونأمل منك التواصل معنا على الرقم 8001242225 أو من خلال البريد الإلكتروني info@riyadbank.com و تزويدنا بملاحظاتك لنتمكن من خدمتك بشكل أفضل.	2023-04-06 04:07:00	2	ar	us		1	ar	many malfunction possible access application log receive temporary code respond numeric keypad appear complete login process	Negative	0	1	0
Google Play Store	07acd62e-a32b-4f29-ad60-bbe3873c5581	Worse than bad	عبد العظيم الشهراني	##########	عميلنا العزيز، يؤسفنا سماع ذلك ونأمل منك التواصل معنا على الرقم 8001242225 أو من خلال البريد الإلكتروني info@riyadbank.com و تزويدنا بملاحظاتك لنتمكن من خدمتك بشكل أفضل.	2023-04-06 04:07:00	0	ar	us		1	ar	bad bad	Negative	1	0	0
Google Play Store	d55a6391-6b50-4f23-8714-680ddd2b17d1	Good.	مدحت سلام	##########			0	ar	us		5	ar	good	Positive	0	0	0
Google Play Store	383424f3-cb28-4f05-a714-39a6657731d5	Amazing	خلدون محمود جوبان	##########			0	ar	us		5	ar	amaze	Positive	0	0	0
Google Play Store	53ecf54a-858c-453b-8914-ec1c8d3551d3	The application is very bad, and the previous application is much better than it.	حسن النحوي	2023-04-05 08:36:00	عميلنا العزيز، نأسف لسماع ذلك ونأمل منك تزويدنا بالملاحظة التي تواجهك عبر البريد الإلكتروني info@riyadbank.com أو يمكنك التواصل معنا على الرقم 8001242225 لنتمكن من خدمتك.	2023-04-06 04:07:00	0	ar	us		1	ar	application bad previous application much good	Negative	1	0	0
Google Play Store	fed749be-b220-4cc1-8df0-5ca83490e2fb	When I recover the password and enter the PIN number for the card, it tells me that the information is incorrect.	تركي الحارثي	##########	عميلنا العزيز، نأمل منك تزويدنا بالملاحظة التي تواجهك عبر البريد الإلكتروني info@riyadbank.com أو يمكنك التواصل معنا على الرقم 8001242225 لنتمكن من خدمتك.	2023-04-06 04:06:00	0	ar	us		1	ar	recover password enter pin number card tell information incorrect	Negative	0	1	0
Google Play Store	870cbc6a-6edf-48c1-a257-d288d3891979	It is very difficult to login after the update, and also activating fingerprint does not work.	صادق السلطان	2023-04-04 07:45:00	عميلنا العزيز، يؤسفنا سماع ذلك ونأمل منك التواصل معنا على الرقم 8001242225 أو من خلال البريد الإلكتروني info@riyadbank.com و تزويدنا بملاحظاتك لنتمكن من خدمتك بشكل أفضل.	2023-04-06 04:06:00	0	ar	us		1	ar	difficult login update also activate fingerprint work	Negative	1	1	0
Google Play Store	8db6a01e-0893-4410-8fcb-9518d21d2786	The latest update is the worst, the program doesn't open for me. Our services have been disrupted because of the update. Will you compensate us? Definitely not.	hahs203	2023-04-04 03:52:00	عميلنا العزيز، يؤسفنا سماع ذلك ونأمل منك التواصل معنا على الرقم 8001242225 أو من خلال البريد الإلكتروني info@riyadbank.com و تزويدنا بملاحظاتك لنتمكن من خدمتك بشكل أفضل.	2023-04-06 04:06:00	0	ar	us		1	ar	late update bad program doesnt open service disrupt update compensate us definitely	Negative	1	1	0
Google Play Store	78b45e67-6898-493b-b5a3-056ab9b05b6a	After the latest update, I cannot login. Every time it asks for the location.	سلوى الدوسري	2023-04-04 02:54:00	عميلنا العزيز، نأمل منك التواصل معنا على الرقم 8001242225 أو من خلال البريد الإلكتروني info@riyadbank.com و تزويدنا بملاحظاتك لنتمكن من خدمتك بشكل أفضل.	2023-04-06 04:06:00	0	ar	us		1	ar	late update login every time ask location	Negative	0	1	0
Google Play Store	e4288703-8cf9-4b43-8226-11408609e635	Good	mohmmad alshaaya	##########			0	ar	us		5	ar	good	Positive	0	0	0
Google Play Store	18625c2e-1540-4957-8f6f-8349d60bca97	"The worst bank in Saudi Arabia, the application is very complicated and does not work. I do not recommend this bank."	ABR ALGRBIAH	##########	عميلنا العزيز، يؤسفنا سماع ذلك ونأمل منك التواصل معنا على الرقم 8001242225 أو من خلال البريد الإلكتروني info@riyadbank.com و تزويدنا بملاحظاتك لنتمكن من خدمتك بشكل أفضل.	2023-04-06 04:06:00	0	ar	us		1	ar	bad bank saudi arabia application complicate work recommend bank	Negative	1	0	0
Google Play Store	da611994-54bf-48af-bc5a-d50e022d376b	He is useless, he doesn't work for me.	Osama Ghorab	##########	عميلنا العزيز، يؤسفنا سماع ذلك ونأمل منك التواصل معنا على الرقم 8001242225 أو من خلال البريد الإلكتروني info@riyadbank.com و تزويدنا بملاحظاتك لنتمكن من خدمتك بشكل أفضل.	2023-04-06 04:05:00	0	ar	us		1	ar	useless doesnt work	Negative	1	1	0
Google Play Store	bfde56fb-d102-4ee6-a87e-14827df89215	The application is not working for many customers of Riyad Bank.	yahia Sendi	##########	عميلنا العزيز، نأمل منك التواصل معنا على الرقم 8001242225 أو من خلال البريد الإلكتروني info@riyadbank.com و تزويدنا بملاحظاتك لنتمكن من خدمتك بشكل أفضل.	2023-04-06 04:05:00	0	ar	us		1	ar	application work many customers riyad bank	Negative	0	1	0
Google Play Store	aea1d813-872f-4e9f-91df-a1cad94b01e7	Every two days there is an update, and the program has become very bad.	محمد ناجي دعاس	##########	عميلنا العزيز، يؤسفنا سماع ذلك ونأمل منك التواصل معنا على الرقم 8001242225 أو من خلال البريد الإلكتروني info@riyadbank.com و تزويدنا بملاحظاتك لنتمكن من خدمتك بشكل أفضل.	2023-04-06 04:05:00	0	ar	us		1	ar	every two days update program become bad	Negative	1	0	0
Google Play Store	ba495a97-3635-4e76-ab6a-3e5de982ce22	I cannot access the program. It asks me to activate the website, and when I do, it asks for phone verification. I agree, but then I encounter a problem and it takes me back to the login screen. This has happened multiple times like this.	T H A M E R	##########	عميلنا العزيز، نأمل منك التواصل معنا على الرقم 8001242225 أو من خلال البريد الإلكتروني info@riyadbank.com و تزويدنا بملاحظاتك لنتمكن من خدمتك بشكل أفضل.	2023-04-06 04:05:00	1	ar	us		1	ar	access program ask activate website ask phone verification agree encounter problem take back login screen happen multiple time like	Negative	0	1	1
Google Play Store	28fe89db-2796-40fa-9749-0ddfae2fce2c	What's been going on with you guys lately? I heard about the transfer situation. What are the benefits of your application?	يازهراء	2023-04-03 07:00:00	عميلنا العزيز، نأمل منك التواصل معنا على الرقم 8001242225 أو من خلال البريد الإلكتروني info@riyadbank.com و تزويدنا بملاحظاتك لنتمكن من خدمتك بشكل أفضل.	2023-04-06 04:05:00	0	ar	us		1	ar	whats go guy lately hear transfer situation benefit application	Neutral	1	1	0
Google Play Store	fa64d916-9e5c-4568-b127-ced3ba48810a	eqfw	wf	2023-04-03 03:30:00			0	ar	us		5	ar	eqfw	Neutral	0	0	0
Google Play Store	e855c05d-e2fd-4d20-a448-94e81e52b66f	"An excellent application for facilitating the management of my account, but sometimes the application freezes."	Omar Kashmiri	2023-04-03 01:59:00	عميلنا العزيز، نأمل منك التواصل معنا على الرقم 8001242225 أو من خلال البريد الإلكتروني info@riyadbank.com و تزويدنا بملاحظاتك لنتمكن من خدمتك بشكل أفضل.	2023-04-06 04:05:00	4	ar	us		5	ar	excellent application facilitate management account sometimes application freeze	Positive	1	0	1
Google Play Store	ff6b68f5-a7de-4a65-a300-764018fb4fd8	Very good.	عمر مغربي	2023-04-03 01:21:00			0	ar	us		5	ar	good	Positive	0	0	0
Google Play Store	67f9d416-acc4-4512-b15c-4f2c12741692	How, my love?	SALIM WSWS	##########			0	ar	us		5	ar	love	Positive	0	0	0
Google Play Store	721d1e2e-3bc4-4b23-b419-38fc4fd8f478	Very excellent.	أبو موسى الزيلعي	2023-04-02 09:22:00			0	ar	us		5	ar	excellent	Positive	0	0	0
Google Play Store	fdc8edfc-e0d3-4d77-9595-0bf2f4f9f841	Excellent very good	متعب الصفحي	2023-04-02 05:02:00			0	ar	us		1	ar	excellent good	Positive	0	0	0
Google Play Store	d5820b2d-fcfc-408c-9b80-5ac2a9d83f0f	It's not possible that I have to transfer in the middle of the night and I can't because a code doesn't arrive. The worst applications have a quick code in them.	mohammed nj	##########	عميلنا العزيز، يؤسفنا سماع ذلك ونأمل منك التواصل معنا على الرقم 8001242225 أو من خلال البريد الإلكتروني info@riyadbank.com و تزويدنا بملاحظاتك لنتمكن من خدمتك بشكل أفضل.	##########	0	ar	us		1	ar	possible transfer middle night cant code doesnt arrive bad applications quick code	Negative	1	1	0
Google Play Store	a3f23fff-4c56-4f33-b439-3cbb6fe69b14	Modification to the evaluation: it was not opening, it was asking for website permission and it wouldn't open. But after the latest update, it started opening again... Thank you.	حمدان العنزي	##########	عميلنا العزيز، يشرفنا ويسعدنا ذلك ونطمح لتقديم الافضل مستقبلاً لتنال خدمتنا على رضائك.	##########	2	ar	us		5	ar	modification evaluation open ask website permission wouldnt open late update start open thank	Neutral	0	1	0
Google Play Store	c830de23-5204-4522-95a9-64df97f4a1dc	The application is stopped.	جودي الجود	##########	عميلنا العزيز، نأمل منك التواصل معنا على الرقم 8001242225 أو من خلال البريد الإلكتروني info@riyadbank.com و تزويدنا بملاحظاتك لنتمكن من خدمتك بشكل أفضل.	##########	0	ar	us		1	ar	application stop	Negative	0	1	0
Google Play Store	3b44f202-3cfe-40dd-8664-7b794dd55051	Bad	عبدالله الحمد	2023-04-01 09:45:00	عميلنا العزيز، يؤسفنا سماع ذلك ونأمل منك التواصل معنا على الرقم 8001242225 أو من خلال البريد الإلكتروني info@riyadbank.com و تزويدنا بملاحظاتك لنتمكن من خدمتك بشكل أفضل.	##########	0	ar	us		1	ar	bad	Neutral	1	0	0
Google Play Store	25534907-19c6-4c5b-a973-0bc17de67189	The program is not working after the latest update, it has become very bad. We kindly request that you solve the issue. Thank you very much.	Noor Ali	2023-04-01 08:20:00	عميلنا العزيز، نأمل منك التواصل معنا على الرقم 8001242225 أو من خلال البريد الإلكتروني info@riyadbank.com و تزويدنا بملاحظاتك لنتمكن من خدمتك بشكل أفضل.	##########	11	ar	us		2	ar	program work late update become bad kindly request solve issue thank much	Negative	1	1	0
Google Play Store	886cf7a7-90a9-40b7-b3dd-90833e631c27	We were waiting for the update and the cancellation of the user's obligation on the website, but it is clear that the bank wants to drive away customers with this awful move. I don't know why they insist on requesting the website.	S S	##########	عميلنا العزيز، يؤسفنا سماع ذلك ونأمل منك التواصل معنا على الرقم 8001242225 أو من خلال البريد الإلكتروني info@riyadbank.com و تزويدنا بملاحظاتك لنتمكن من خدمتك بشكل أفضل.	##########	0	ar	us		1	ar	wait update cancellation users obligation website clear bank want drive away customers awful move dont know insist request website	Negative	1	1	0
Google Play Store	c0057356-7237-4d73-b437-5b5c92f07165	The application does not serve Android users after today's update. It shows to me "Cannot assist you at the moment, make sure of your network connection" and then exits the application.	Mohd ALmeen	##########	عميلنا العزيز، نأمل منك التواصل معنا على الرقم 8001242225 أو من خلال البريد الإلكتروني info@riyadbank.com و تزويدنا بملاحظاتك لنتمكن من خدمتك بشكل أفضل.	##########	4	ar	us		1	ar	application serve android users todays update show assist moment make sure network connection exit application	Negative	0	1	0
Google Play Store	78cba27d-e4d2-4ef0-87ca-c092976cc173	The error is on my side, but it has been clarified, so I thank you for your efforts and the development of your services. Regards and appreciation.	Mohamednoor Turki	##########	عميلنا العزيز، نأمل منك التواصل معنا على الرقم 8001242225 أو من خلال البريد الإلكتروني info@riyadbank.com و تزويدنا بملاحظاتك لنتمكن من خدمتك بشكل أفضل.	##########	3	ar	us		5	ar	error side clarify thank efforts development service regard appreciation	Positive	1	0	0
Google Play Store	b399e57a-4d5f-4fbc-9a7e-5e34a37dd532	It stars and many applications are very, very, very bad. It doesn't open and sometimes it asks for location, sometimes for internet. What's your situation?	majjd al	##########	عميلنا العزيز، يؤسفنا سماع ذلك ونأمل منك التواصل معنا على الرقم 8001242225 أو من خلال البريد الإلكتروني info@riyadbank.com و تزويدنا بملاحظاتك لنتمكن من خدمتك بشكل أفضل.	##########	0	ar	us		1	ar	star many applications bad doesnt open sometimes ask location sometimes internet whats situation	Negative	1	1	0
Google Play Store	5b733cbd-2eee-4e67-a94e-05af0b2db038	The application always gives me a message that in order to login, I should make sure that my device is secure. It also gives me a reference number, but I am unable to open the application. I contacted customer service, but they were not helpful.	Mahmoud Gobara	##########	عميلنا العزيز، نأمل منك التواصل معنا على الرقم 8001242225 أو من خلال البريد الإلكتروني info@riyadbank.com و تزويدنا بملاحظاتك لنتمكن من خدمتك بشكل أفضل.	##########	0	ar	us		1	ar	application always give message order login make sure device secure also give reference number unable open application contact customer service helpful	Negative	0	1	0
Google Play Store	774eb5e5-3c83-4da6-8c59-b0aaceab66ea	Excellent financial experience	علي خردلي	##########			0	ar	us		5	ar	excellent financial experience	Positive	0	0	0
Google Play Store	3b0761a6-9577-4b69-82f3-b8ebb1ddabad	Why is the application not opening?	Malk KHLO	##########	عميلنا العزيز، نأمل منك التواصل معنا على الرقم 8001242225 أو من خلال البريد الإلكتروني info@riyadbank.com و تزويدنا بملاحظاتك لنتمكن من خدمتك بشكل أفضل.	##########	0	ar	us		5	ar	application open	Negative	0	1	0
Google Play Store	9b290f84-a915-4896-93f2-cb40c37b26f1	Since the program was updated, we have not benefited from the service. It is better to keep the balance for a very important update.	فيصل الدوسري	##########	عميلنا العزيز، يؤسفنا سماع ذلك ونأمل منك التواصل معنا على الرقم 8001242225 أو من خلال البريد الإلكتروني info@riyadbank.com و تزويدنا بملاحظاتك لنتمكن من خدمتك بشكل أفضل.	##########	2	ar	us		1	ar	since program update benefit service good keep balance important update	Negative	1	0	0
Google Play Store	ea9af3c4-1ed4-43a3-92a5-cb1351d343ec	the worst requesting a position despite being employed. 5-star failure.	Abdulaziz aaa	##########	عميلنا العزيز، يؤسفنا سماع ذلك ونأمل منك التواصل معنا على الرقم 8001242225 أو من خلال البريد الإلكتروني info@riyadbank.com و تزويدنا بملاحظاتك لنتمكن من خدمتك بشكل أفضل.	##########	0	ar	us		1	ar	bad request position despite employ star failure	Negative	1	1	0
Google Play Store	81256c4c-14da-4ca5-820b-45a176dd387b	He came and applied kohl to her eyes, but he no longer remembers the username.	حسن ابو مهند	##########			0	ar	us		2	ar	come apply kohl eye long remember username	Neutral	1	1	0
Google Play Store	b1f437aa-f0a3-4d19-a0e8-ad08dd95c318	Peace be upon you and the mercy and blessings of Allah. The application has many problems, and one of these problems is that the website keeps displaying a continuous error. Each update makes it worse than before. If anyone has a solution, please write it, and Allah is the Helper.	HBBL 3COM	##########	عميلنا العزيز، يؤسفنا سماع ذلك ونأمل منك التواصل معنا على الرقم 8001242225 أو من خلال البريد الإلكتروني info@riyadbank.com و تزويدنا بملاحظاتك لنتمكن من خدمتك بشكل أفضل.	##########	1	ar	us		2	ar	peace upon mercy blessings allah application many problems one problems website keep display continuous error update make bad anyone solution please write allah helper	Negative	1	1	0
Google Play Store	9b98fbf1-692c-4a45-9fd2-fd6fe8bf26b6	It doesn't open, very bad, it's a waste, there's a star in it.	عز	##########	عميلنا العزيز، يؤسفنا سماع ذلك ونأمل منك التواصل معنا على الرقم 8001242225 أو من خلال البريد الإلكتروني info@riyadbank.com و تزويدنا بملاحظاتك لنتمكن من خدمتك بشكل أفضل.	##########	0	ar	us		1	ar	doesnt open bad waste theres star	Negative	1	0	0
Google Play Store	89f702e9-fd01-41d7-9b7d-5307c15c48da	The tablet is not working properly.	ماجد المتينmajed	##########	عميلنا العزيز، نأمل منك التواصل معنا على الرقم 8001242225 أو من خلال البريد الإلكتروني info@riyadbank.com و تزويدنا بملاحظاتك لنتمكن من خدمتك بشكل أفضل.	##########	3	ar	us		1	ar	tablet work properly	Negative	0	1	0
Google Play Store	0a5e46e8-a1aa-496c-93b9-d56323b220bb	Very bad.	ابو نواف	##########	عميلنا العزيز، يؤسفنا سماع ذلك ونأمل منك التواصل معنا على الرقم 8001242225 أو من خلال البريد الإلكتروني info@riyadbank.com و تزويدنا بملاحظاتك لنتمكن من خدمتك بشكل أفضل.	##########	0	ar	us		1	ar	bad	Negative	1	0	0
Google Play Store	53456872-b91c-4519-aed0-5490575d73c0	When logging in, the website requires permission. I tried several times but couldn't log in. Very bad.	قناة كل الالوان	##########	عميلنا العزيز، يؤسفنا سماع ذلك ونأمل منك التواصل معنا على الرقم 8001242225 أو من خلال البريد الإلكتروني info@riyadbank.com و تزويدنا بملاحظاتك لنتمكن من خدمتك بشكل أفضل.	##########	2	ar	us		1	ar	log website require permission try several time couldnt log bad	Negative	1	1	0
Google Play Store	3e017ff0-9f4a-4fed-a3fd-9acf828ff9dc	Excellent greetings to all of you. Riyad Mobile is an excellent and advanced service that contributes to facilitating banking transactions, bill payments, transfers, and conducting banking transactions easily and effortlessly, without the need to go to the branch or ATM machine. May Allah reward you abundantly and grant you success in serving the country and advancing banking transactions, so tha…	عبدالمحسن العولقي	##########	عميلنا العزيز، يشرفنا ويسعدنا ذلك ونطمح لتقديم الافضل مستقبلاً لتنال خدمتنا على رضائك.	##########	0	ar	us		5	ar	excellent greetings riyad mobile excellent advance service contribute facilitate bank transactions bill payments transfer conduct bank transactions easily effortlessly without need go branch atm machine may allah reward abundantly grant success serve country advance bank transactions among advance countries bank alriyad one lead bank field bank transactions riyad mobile new breakthrough world ban…	Positive	1	0	0
Google Play Store	6f886c77-196c-4164-926f-ff4c7df387ef	Excellent service, and thank you.	عماد كاريم	##########			0	ar	us		5	ar	excellent service thank	Positive	0	0	0
Google Play Store	7fa9991a-e533-460f-9a31-f19ec3d6f69b	It has become really bad! Every time I open it, it asks for website activation, even though the website is already activated and everything is fine. It refuses entry.	عبدالله العمراني	##########	عميلنا العزيز، نأسف لسماع ذلك ونأمل منك تزويدنا بالملاحظة التي تواجهك عبر البريد الإلكتروني info@riyadbank.com أو يمكنك التواصل معنا على الرقم 8001242225 لنتمكن من خدمتك.	##########	0	ar	us		1	ar	become really bad every time open ask website activation even though website already activate everything fine refuse entry	Negative	1	1	0
Google Play Store	fb03597c-906f-4d6f-919a-ff30ff2eedd5	Excellent and easy.	moayyadoo Alsabah	##########			0	ar	us		4	ar	excellent easy	Positive	0	0	0
Google Play Store	b81dd6a5-8580-42fd-8388-72c3322635ac	The application, after the latest update, only allows you to enter by enabling location, which is a privacy breach. However, I enabled the location and still couldn't access my account (there is an error in determining the location). May Allah forgive me.	Kamal Alabdli	##########	عميلنا العزيز، نأمل منك تزويدنا بالملاحظة التي تواجهك عبر البريد الإلكتروني info@riyadbank.com أو يمكنك التواصل معنا على الرقم 8001242225 لنتمكن من خدمتك.	##########	4	ar	us		3	ar	application late update allow enter enable location privacy breach however enable location still couldnt access account error determine location may allah forgive	Negative	0	1	0
Google Play Store	805fc043-ad30-4764-bc39-e00431694435	"Terrible" or "Awful"	Nana Nana	##########	عميلنا العزيز، يؤسفنا سماع ذلك ونأمل منك التواصل معنا على الرقم 8001242225 أو من خلال البريد الإلكتروني info@riyadbank.com و تزويدنا بملاحظاتك لنتمكن من خدمتك بشكل أفضل.	##########	0	ar	us		1	ar	terrible awful	Negative	1	0	0
Google Play Store	54f7c65e-abb1-4301-92bf-6b7a8a56e665	It's really bad, it never opens.	عشق الطفولة	##########	عميلنا العزيز، نأسف لسماع ذلك ونأمل منك تزويدنا بالملاحظة التي تواجهك عبر البريد الإلكتروني info@riyadbank.com أو يمكنك التواصل معنا على الرقم 8001242225 لنتمكن من خدمتك.	##########	0	ar	us		1	ar	really bad never open	Negative	1	1	0
Google Play Store	c55147aa-1692-47ec-aff2-289d6a1aa5a9	The application is not currently opening.	munir munir	##########	عميلنا العزيز، نأمل منك التواصل معنا على الرقم 8001242225 أو من خلال البريد الإلكتروني info@riyadbank.com و تزويدنا بملاحظاتك لنتمكن من خدمتك بشكل أفضل.	##########	0	ar	us		3	ar	application currently open	Neutral	0	1	0
Google Play Store	63ed8a50-ca82-49a7-ab47-a90e12f90207	It has become bad, it doesn't open everything I try to access. It says there is an error on the website for more than two days. I've been trying and facing the same problem. What is the solution, even though the website is activated and the application is updated?	أم ميعاد	##########	عميلنا العزيز، يؤسفنا سماع ذلك ونأمل منك التواصل معنا على الرقم 8001242225 أو من خلال البريد الإلكتروني info@riyadbank.com و تزويدنا بملاحظاتك لنتمكن من خدمتك بشكل أفضل.	##########	2	ar	us		1	ar	become bad doesnt open everything try access say error website two days ive try face problem solution even though website activate application update	Negative	1	1	0
Google Play Store	df102d87-6318-4485-977f-3f2c538c1f32	Mobile recharge, no additional mobile recharge.	Zabih Ullah	##########	عميلنا العزيز، نأمل منك التواصل معنا على الرقم 8001242225 أو من خلال البريد الإلكتروني info@riyadbank.com و تزويدنا بملاحظاتك لنتمكن من خدمتك بشكل أفضل.	##########	0	ar	us		2	ar	mobile recharge additional mobile recharge	Neutral	0	1	0
Google Play Store	b28bb8e8-4867-4d85-a1dc-21d3da4980bb	The worst application, I recommend it to everyone.	Khaled . SL	##########	عميلنا العزيز، نأسف لسماع ذلك ونأمل منك تزويدنا بالملاحظة التي تواجهك عبر البريد الإلكتروني info@riyadbank.com أو يمكنك التواصل معنا على الرقم 8001242225 لنتمكن من خدمتك.	##########	0	ar	us		1	ar	bad application recommend everyone	Negative	1	0	0
Google Play Store	dde773d0-c65a-4372-898b-86eaabd22254	It is not functioning after activating the website.	منصور العلي	##########	عميلنا العزيز، نأمل منك التواصل معنا على الرقم 8001242225 أو من خلال البريد الإلكتروني info@riyadbank.com و تزويدنا بملاحظاتك لنتمكن من خدمتك بشكل أفضل.	##########	0	ar	us		1	ar	function activate website	Negative	0	1	0
Google Play Store	755a0b70-15d1-43cc-a1e6-7cce880c0c52	This is a very bad application.	Maed Al zahrani	##########	عميلنا العزيز، يؤسفنا سماع ذلك ونأمل منك التواصل معنا على الرقم 8001242225 أو من خلال البريد الإلكتروني info@riyadbank.com و تزويدنا بملاحظاتك لنتمكن من خدمتك بشكل أفضل.	##########	0	ar	us		1	ar	bad application	Negative	1	0	0
Google Play Store	b1081955-8e87-4c7b-b51d-32413c8dcf22	The most troublesome bank in life, no application and no branches. What is the use of updates? I should switch to another bank, what benefit did I get from the application? I want to know my balance.	ريكي جودت	##########	عميلنا العزيز، يؤسفنا سماع ذلك ونأمل منك التواصل معنا على الرقم 8001242225 أو من خلال البريد الإلكتروني info@riyadbank.com و تزويدنا بملاحظاتك لنتمكن من خدمتك بشكل أفضل.	##########	0	ar	us		1	ar	troublesome bank life application branch use update switch another bank benefit get application want know balance	Negative	1	1	0
Google Play Store	c5e3940e-1c22-48f1-83c6-ba2ea70386d6	"Cy doesn't open because the site is inaccessible."	ابو فيصل	##########	عميلنا العزيز، يؤسفنا سماع ذلك ونأمل منك التواصل معنا على الرقم 8001242225 أو من خلال البريد الإلكتروني info@riyadbank.com و تزويدنا بملاحظاتك لنتمكن من خدمتك بشكل أفضل.	##########	0	ar	us		1	ar	cy doesnt open site inaccessible	Negative	0	1	0
Google Play Store	2b1ec271-44d7-443f-b241-8324cef822a6	The program still doesn't serve me at the right time. It refuses to log in and gives me website activation. I activate the website and the same thing happens. The problem still persists. Our work has been disrupted. In case the problem persists, we will have to transfer our salary to another bank where we can carry out our work.	Abu Zaki	##########	عميلنا العزيز، يؤسفنا سماع ذلك ونأمل منك التواصل معنا على الرقم 8001242225 أو من خلال البريد الإلكتروني info@riyadbank.com و تزويدنا بملاحظاتك لنتمكن من خدمتك بشكل أفضل.	##########	120	ar	us		1	ar	program still doesnt serve right time refuse log give website activation activate website thing happen problem still persist work disrupt case problem persist transfer salary another bank carry work	Negative	0	1	0
Google Play Store	ebd343cc-137d-4eb3-b706-9e9f0c28c28b	Good	Sam Sam	##########			0	ar	us		5	ar	good	Positive	0	0	0
Google Play Store	1ca5f42e-a327-4a77-9be3-3be0feeb7610	The application is not working at all despite the update.	Adr Ard	##########	عميلنا العزيز، نأمل منك التواصل معنا على الرقم 8001242225 أو من خلال البريد الإلكتروني info@riyadbank.com و تزويدنا بملاحظاتك لنتمكن من خدمتك بشكل أفضل.	##########	0	ar	us		3	ar	application work despite update	Negative	0	1	0
Google Play Store	bf3989b6-4bd6-41d8-af56-f3dc7683233f	After the update, it's not working. It has many problems, and I do not recommend downloading such an application.	Hf D	##########	عميلنا العزيز، يؤسفنا سماع ذلك ونأمل منك التواصل معنا على الرقم 8001242225 أو من خلال البريد الإلكتروني info@riyadbank.com و تزويدنا بملاحظاتك لنتمكن من خدمتك بشكل أفضل.	##########	0	ar	us		1	ar	update work many problems recommend download application	Negative	0	1	0
Google Play Store	be9fc09b-f4e6-48d3-ab38-72e0a0d5405a	I am denied entry into the application due to enabling the location, and the location is activated?	mayyan job	##########	عميلنا العزيز، نأمل منك التواصل معنا على الرقم 8001242225 أو من خلال البريد الإلكتروني info@riyadbank.com و تزويدنا بملاحظاتك لنتمكن من خدمتك بشكل أفضل.	##########	0	ar	us		1	ar	deny entry application due enable location location activate	Negative	0	1	0
Google Play Store	961e5f8a-6cec-46e1-b4f8-3d6518f32f14	An experience that is unmatched.	فيصل الايداء	##########			0	ar	us		5	ar	experience unmatched	Positive	1	0	0
Google Play Store	9767a235-13e5-402c-af5b-3e239d2fe162	I am unable to access the account. Please fix it as soon as possible.	هبوب عتيبه	##########	عميلنا العزيز، يؤسفنا سماع ذلك ونأمل منك التواصل معنا على الرقم 8001242225 أو من خلال البريد الإلكتروني info@riyadbank.com و تزويدنا بملاحظاتك لنتمكن من خدمتك بشكل أفضل.	##########	0	ar	us		1	ar	unable access account please fix soon possible	Negative	0	1	0
Google Play Store	840f3261-297c-4037-a6a2-51758487c9c5	Very complicated	MOHAMED ALZAHRANY	##########	عميلنا العزيز، نأمل منك التواصل معنا على الرقم 8001242225 أو من خلال البريد الإلكتروني info@riyadbank.com و تزويدنا بملاحظاتك لنتمكن من خدمتك بشكل أفضل.	##########	0	ar	us		1	ar	complicate	Neutral	1	0	0
Google Play Store	121313ae-d9c0-4a51-9ed9-144acd5a082f	After the update, it is bad. The app keeps crashing all the time and I have to uninstall it and reinstall it again.	kim88 kim	##########	عميلنا العزيز، يؤسفنا سماع ذلك ونأمل منك التواصل معنا على الرقم 8001242225 أو من خلال البريد الإلكتروني info@riyadbank.com و تزويدنا بملاحظاتك لنتمكن من خدمتك بشكل أفضل.	##########	0	ar	us		2	ar	update bad app keep crash time uninstall reinstall	Negative	1	1	0
Google Play Store	0092cdb2-f471-439c-856b-2e4114fba144	Very very very bad	Ahmed Emam Mahmoud Abdelaal	##########	عميلنا العزيز، يؤسفنا سماع ذلك ونأمل منك التواصل معنا على الرقم 8001242225 أو من خلال البريد الإلكتروني info@riyadbank.com و تزويدنا بملاحظاتك لنتمكن من خدمتك بشكل أفضل.	##########	0	ar	us		1	ar	bad	Negative	1	0	0
Google Play Store	6ac77bfc-3649-48dc-bf18-583d5ddb625d	After the update, it became bad and it asks for permission to access the website.	سلطان العنزي	##########	عميلنا العزيز، يؤسفنا سماع ذلك ونأمل منك التواصل معنا على الرقم 8001242225 أو من خلال البريد الإلكتروني info@riyadbank.com و تزويدنا بملاحظاتك لنتمكن من خدمتك بشكل أفضل.	##########	0	ar	us		1	ar	update become bad ask permission access website	Negative	1	0	0
Google Play Store	ef36d18b-c463-481f-a3b1-78bf5df51e2c	There is a great struggle in accessing the application after the latest update. Every time, it asks for permission to access the location, but still doesn't open.	abusaleh burydah	##########	عميلنا العزيز، يؤسفنا سماع ذلك ونأمل منك التواصل معنا على الرقم 8001242225 أو من خلال البريد الإلكتروني info@riyadbank.com و تزويدنا بملاحظاتك لنتمكن من خدمتك بشكل أفضل.	##########	1	ar	us		1	ar	great struggle access application late update every time ask permission access location still doesnt open	Negative	1	1	0
Google Play Store	0f5e16e9-4ae2-4ded-871f-0f5d961a9171	After the new update, there is a glitch in the program that prevents you from accessing the account, and you always encounter an error on the website.	HASSAN ALHUSSAIN	##########	عميلنا العزيز، نأمل منك التواصل معنا على الرقم 8001242225 أو من خلال البريد الإلكتروني info@riyadbank.com و تزويدنا بملاحظاتك لنتمكن من خدمتك بشكل أفضل.	##########	0	ar	us		1	ar	new update glitch program prevent access account always encounter error website	Negative	0	1	0
Google Play Store	ad9881a2-7e69-404d-a9a8-4ca421461cce	Excellent Very	ابونواف العلكمي	##########			0	ar	us		5	ar	excellent	Positive	0	0	0
Google Play Store	677f5d74-626a-42d1-b6f4-dee8cf9e683c	Very beautiful.	Mam Ba	##########			0	ar	us		5	ar	beautiful	Positive	0	0	0
Google Play Store	ce5d8ad6-fc52-476a-a024-2bfc2d9a387e	Very, very bad.	Saeed1402 Alzahrani	##########	عميلنا العزيز، يؤسفنا سماع ذلك ونأمل منك التواصل معنا على الرقم 8001242225 أو من خلال البريد الإلكتروني info@riyadbank.com و تزويدنا بملاحظاتك لنتمكن من خدمتك بشكل أفضل.	##########	0	ar	us		1	ar	bad	Negative	1	0	0
Google Play Store	32673599-96d0-4354-9b1b-acfa9991e9fc	It is not working. It keeps asking for the location and the location is activated.	طراد شايع	##########	عميلنا العزيز، نأمل منك التواصل معنا على الرقم 8001242225 أو من خلال البريد الإلكتروني info@riyadbank.com و تزويدنا بملاحظاتك لنتمكن من خدمتك بشكل أفضل.	##########	0	ar	us		1	ar	work keep ask location location activate	Negative	0	1	0
Google Play Store	a5653dfa-2276-4886-bfab-7495acd3261b	The application has become bad after the latest update. It always asks me for location even though it is already enabled, and it refuses to access it for this reason. Please provide a solution.	A Ali	##########	عميلنا العزيز، يؤسفنا سماع ذلك ونأمل منك التواصل معنا على الرقم 8001242225 أو من خلال البريد الإلكتروني info@riyadbank.com و تزويدنا بملاحظاتك لنتمكن من خدمتك بشكل أفضل.	##########	0	ar	us		1	ar	application become bad late update always ask location even though already enable refuse access reason please provide solution	Negative	1	1	0
Google Play Store	4abbf0b0-4c65-4a34-8ec2-36134d0ad301	I changed the password more than once, but it still won't open for me. I don't know what the problem is.	خالد	##########	عميلنا العزيز، نأمل منك التواصل معنا على الرقم 8001242225 أو من خلال البريد الإلكتروني info@riyadbank.com و تزويدنا بملاحظاتك لنتمكن من خدمتك بشكل أفضل.	##########	0	ar	us		5	ar	change password still wont open dont know problem	Negative	0	1	0
Google Play Store	a954b423-29b4-40bf-a375-90bac5044c7f	The application is bad since you added the voice recognition feature in the call. It means you added a feature but ruined the application and the feature is terrible.	عبدالعزيز .السعود	##########	عميلنا العزيز، يؤسفنا سماع ذلك ونأمل منك التواصل معنا على الرقم 8001242225 أو من خلال البريد الإلكتروني info@riyadbank.com و تزويدنا بملاحظاتك لنتمكن من خدمتك بشكل أفضل.	##########	0	ar	us		1	ar	application bad since add voice recognition feature call mean add feature ruin application feature terrible	Negative	1	1	0
Google Play Store	fbf99a61-9d67-405d-85a9-981b6ccb2cbd	Unfortunately, after the new update, the website is requesting that despite activating the service and contacting the bank, there is no solution. They said they will contact me, but it's been two weeks and still nothing.	سعد بن سني	##########	عميلنا العزيز، يؤسفنا سماع ذلك ونأمل منك التواصل معنا على الرقم 8001242225 أو من خلال البريد الإلكتروني info@riyadbank.com و تزويدنا بملاحظاتك لنتمكن من خدمتك بشكل أفضل.	##########	0	ar	us		1	ar	unfortunately new update website request despite activate service contact bank solution say contact two weeks still nothing	Negative	1	1	0
Google Play Store	873f3cf8-db17-4ce0-9462-aed499ce88c7	The application is not opening.	سالم العطوي	##########	عميلنا العزيز، نأمل منك التواصل معنا على الرقم 8001242225 أو من خلال البريد الإلكتروني info@riyadbank.com و تزويدنا بملاحظاتك لنتمكن من خدمتك بشكل أفضل.	##########	0	ar	us		1	ar	application open	Negative	0	1	0
Google Play Store	d25eafb4-1816-4555-b49c-ff07a62f12e0	The website suddenly became closed, and if you try to access it, it asks for the site's permission, and the site's permission is active.	محمد حنان	##########	عميلنا العزيز، نأمل منك التواصل معنا على الرقم 8001242225 أو من خلال البريد الإلكتروني info@riyadbank.com و تزويدنا بملاحظاتك لنتمكن من خدمتك بشكل أفضل.	##########	0	ar	us		1	ar	website suddenly become close try access ask sit permission sit permission active	Negative	0	1	0
Google Play Store	3ce8b73f-a1f2-4bc5-b9a9-f03b28a71276	Bank Al Riyadh, the distinguished bank in services.	عبدالكريم الزهراني	##########			0	ar	us		4	ar	bank al riyadh distinguish bank service	Positive	1	0	0
Google Play Store	6e758414-0ef5-4dae-a825-c8cc85b6b4a2	The problem with the website has been resolved. Thank you to those responsible for developing the Riyadh application.	SLMAN 6544	##########	عميلنا العزيز، يشرفنا ويسعدنا ذلك ونطمح لتقديم الافضل مستقبلاً لتنال خدمتنا على رضائك.	##########	1	ar	us		5	ar	problem website resolve thank responsible develop riyadh application	Positive	0	1	0
Google Play Store	0acfe51f-2524-402e-9189-a76c22823ed0	We still need to try it.	awad awad	##########			0	ar	us		1	ar	still need try	Neutral	0	0	0
Google Play Store	8508532b-1786-4e17-a618-bc710510276d	The application is bad, complicated, and its problems never end. If I can't add a card, what's the use of the program?	جاسم الجحدلي	##########	عميلنا العزيز، نأسف لسماع ذلك ونأمل منك تزويدنا بالملاحظة التي تواجهك عبر البريد الإلكتروني info@riyadbank.com أو يمكنك التواصل معنا على الرقم 8001242225 لنتمكن من خدمتك.	##########	0	ar	us		1	ar	application bad complicate problems never end cant add card whats use program	Negative	1	1	0
Google Play Store	2f3ee9b2-1be6-46d5-98cc-c9b0dc888206	He doesn't even deserve it, may God bless you. He delayed it because we cannot access our accounts, just like all the banks. I had to go all the way and I am a retired military doctor, and I have a surgery. Instead of giving us a break, you kept us occupied. May God keep you busy, because we cannot transfer or pay, you only withdraw and disappear.	اللهم صل وسلم على محمد	##########	عميلنا العزيز، يؤسفنا سماع ذلك ونأمل منك التواصل معنا على الرقم 8001242225 أو من خلال البريد الإلكتروني info@riyadbank.com و تزويدنا بملاحظاتك لنتمكن من خدمتك بشكل أفضل.	##########	0	ar	us		1	ar	doesnt even deserve may god bless delay access account like bank go way retire military doctor surgery instead give us break keep us occupy may god keep busy transfer pay withdraw disappear	Negative	1	1	1
Google Play Store	17461b29-3d5f-4633-b816-de77792dca26	Very bad, and I cannot convert online and the transfer feature has disappeared.	Abo Feraas Alzoom	##########	عميلنا العزيز، نأسف لسماع ذلك ونأمل منك تزويدنا بالملاحظة التي تواجهك عبر البريد الإلكتروني info@riyadbank.com أو يمكنك التواصل معنا على الرقم 8001242225 لنتمكن من خدمتك.	##########	0	ar	us		1	ar	bad convert online transfer feature disappear	Negative	1	1	0
Google Play Store	71ecbeb5-a75e-4497-adca-d2c832ff429b	After the update, it stopped working, it didn't open and it says "Access to the website is not allowed. Please solve the problem. We have downloaded the salaries and we need services."	حياة الغامدي	##########	عميلنا العزيز، نأمل منك التواصل معنا على الرقم 8001242225 أو من خلال البريد الإلكتروني info@riyadbank.com و تزويدنا بملاحظاتك لنتمكن من خدمتك بشكل أفضل.	##########	0	ar	us		1	ar	update stop work didnt open say access website allow please solve problem download salaries need service	Negative	0	1	0
Google Play Store	b4eb2dae-3ebe-4439-9074-8f481c6fd3bc	Unfortunately, after the latest update, the conversion icon and beneficiary management do not appear. 😔	بوعباس بوعباس	##########	عميلنا العزيز، يؤسفنا سماع ذلك ونأمل منك التواصل معنا على الرقم 8001242225 أو من خلال البريد الإلكتروني info@riyadbank.com و تزويدنا بملاحظاتك لنتمكن من خدمتك بشكل أفضل.	##########	1	ar	us		1	ar	unfortunately late update conversion icon beneficiary management appear	Negative	0	1	0
Google Play Store	0aec3054-82e8-4677-91f7-b5d4a5ceb4ca	The application has become very bad.	خالد معشي	##########	عميلنا العزيز، يؤسفنا سماع ذلك ونأمل منك التواصل معنا على الرقم 8001242225 أو من خلال البريد الإلكتروني info@riyadbank.com و تزويدنا بملاحظاتك لنتمكن من خدمتك بشكل أفضل.	##########	0	ar	us		1	ar	application become bad	Negative	1	0	0
Google Play Store	5b5a3bea-dc31-49ee-bdb2-c20386a7bb0a	The application is freezing constantly.	بندر الحربي	##########	عميلنا العزيز، نأمل منك التواصل معنا على الرقم 8001242225 أو من خلال البريد الإلكتروني info@riyadbank.com و تزويدنا بملاحظاتك لنتمكن من خدمتك بشكل أفضل.	##########	0	ar	us		1	ar	application freeze constantly	Negative	1	0	1
Google Play Store	599b4c93-fed8-4a7b-8588-6523ad3e6b3a	The best bank with all services and extreme easiness.	ᄀᄇᄋᄉᄌᄉᄌᄃᄂ	##########			2	ar	us		5	ar	best bank service extreme easiness	Positive	0	0	0
Google Play Store	e85fdde3-5437-4eb5-87a2-6bef511dcdec	Very bad... It's not letting me in, and the reason is not being able to access the website, even though the website is working perfectly and very high quality.	نبعُ الحياة ه ِ ه	##########	عميلنا العزيز، نأسف لسماع ذلك ونأمل منك تزويدنا بالملاحظة التي تواجهك عبر البريد الإلكتروني info@riyadbank.com أو يمكنك التواصل معنا على الرقم 8001242225 لنتمكن من خدمتك.	##########	3	ar	us		1	ar	bad let reason able access website even though website work perfectly high quality	Negative	1	1	0
Google Play Store	76190e50-a56e-4b40-81fe-e198db0c8429	Very good.	Hgtf Hg	##########			0	ar	us		5	ar	good	Positive	0	0	0
Google Play Store	36f25158-dbe7-45cf-b0b7-867e11fd7869	The program has been deleted more than 5 times, and the same problem persists. It asks for location identification, and the location has been activated, yet the same issue still persists and it is not working.	rayan eraqi	##########	عميلنا العزيز، نأسف لسماع ذلك ونأمل منك تزويدنا بالملاحظة التي تواجهك عبر البريد الإلكتروني info@riyadbank.com أو يمكنك التواصل معنا على الرقم 8001242225 لنتمكن من خدمتك.	##########	6	ar	us		1	ar	program delete time problem persist ask location identification location activate yet issue still persist work	Negative	0	1	0
Google Play Store	337708d0-b060-4bd0-bf90-a0b3a79d410e	The application has become corrupt and is unresponsive.	تركي المالكي	##########	عميلنا العزيز، نأسف لسماع ذلك ونأمل منك تزويدنا بالملاحظة التي تواجهك عبر البريد الإلكتروني info@riyadbank.com أو يمكنك التواصل معنا على الرقم 8001242225 لنتمكن من خدمتك.	##########	0	ar	us		5	ar	application become corrupt unresponsive	Negative	1	0	1
Google Play Store	96c0ca47-ab49-4ac7-9379-4bfab57cfbde	The application has become very bad, and for a week now the application is not working. If I enter the password, the application takes me back to the website opening feature even though the website is already open. Eventually, it takes me back to uninstalling.	Joder Fares	##########	عميلنا العزيز، يؤسفنا سماع ذلك ونأمل منك التواصل معنا على الرقم 8001242225 أو من خلال البريد الإلكتروني info@riyadbank.com و تزويدنا بملاحظاتك لنتمكن من خدمتك بشكل أفضل.	##########	2	ar	us		1	ar	application become bad week application work enter password application take back website open feature even though website already open eventually take back uninstalling	Negative	1	1	0
Google Play Store	9fbefdc1-f663-4d38-8d6c-2894d5e600be	It has become very bad, I can't access my account.	هاني محمد	##########	عميلنا العزيز، نأسف لسماع ذلك ونأمل منك تزويدنا بالملاحظة التي تواجهك عبر البريد الإلكتروني info@riyadbank.com أو يمكنك التواصل معنا على الرقم 8001242225 لنتمكن من خدمتك.	##########	0	ar	us		1	ar	become bad cant access account	Negative	1	1	0
Google Play Store	edc3a89a-e063-4ac9-b004-06fefef0ba9f	The program refuses to open since yesterday and gives me a message saying: "Sorry, we cannot assist you at the moment."	soso Ali	##########	عميلنا العزيز، نأمل منك تزويدنا بالملاحظة التي تواجهك عبر البريد الإلكتروني info@riyadbank.com أو يمكنك التواصل معنا على الرقم 8001242225 لنتمكن من خدمتك.	##########	0	ar	us		1	ar	program refuse open since yesterday give message say sorry assist moment	Negative	0	1	0
Google Play Store	ac764a02-8fa9-47cf-af3d-1ff55834e53b	Excellent	احمد على	##########			0	ar	us		5	ar	excellent	Positive	0	0	0
Google Play Store	8a588f1a-a2c5-4517-9606-8a9356a64811	Now we can say congratulations on this new update. Logging in and activating fingerprint has been made easy. We wish you continued success and the continuation of the service in this manner. Ramadan Kareem.	Abu Rayan	##########			5	ar	us		5	ar	say congratulations new update log activate fingerprint make easy wish continue success continuation service manner ramadan kareem	Positive	0	1	0
Google Play Store	b374b99d-8148-4a53-8280-5f9a3516b6da	Very beautiful	AMG Alqarni	##########			0	ar	us		5	ar	beautiful	Positive	0	0	0
Google Play Store	9e6e2d85-0dee-46ee-ab5b-2dc1fb691400	After the update, it became worse, unfortunately, even in logging in.	Nazer Latef	##########	عميلنا العزيز، نأسف لسماع ذلك ونأمل منك تزويدنا بالملاحظة التي تواجهك عبر البريد الإلكتروني info@riyadbank.com أو يمكنك التواصل معنا على الرقم 8001242225 لنتمكن من خدمتك.	##########	0	ar	us		1	ar	update become bad unfortunately even log	Negative	1	1	0
Google Play Store	52afd6b1-7641-4143-a90d-3dab895ec8a4	Hello, peace, mercy, and blessings be upon you. I am facing a problem with this program after updating it. There are issues, including the website.	ابووليد الكريري	##########	عميلنا العزيز، نأمل منك تزويدنا بالملاحظة التي تواجهك عبر البريد الإلكتروني info@riyadbank.com أو يمكنك التواصل معنا على الرقم 8001242225 لنتمكن من خدمتك.	##########	0	ar	us		1	ar	hello peace mercy blessings upon face problem program update issue include website	Negative	1	0	0
Google Play Store	27b953ea-fc96-4e69-82b5-843f8ab6af2e	It hangs.	ابو محمد Hammad	##########	عميلنا العزيز، نأمل منك تزويدنا بالملاحظة التي تواجهك عبر البريد الإلكتروني info@riyadbank.com أو يمكنك التواصل معنا على الرقم 8001242225 لنتمكن من خدمتك.	##########	0	ar	us		3	ar	hang	Neutral	0	0	1
Google Play Store	d5a2200f-7918-47f3-b4e5-e752278d696e	I requested a bank card from Al Riyadh Bank and I haven't received or used it yet. The reason is that your application doesn't allow me to access and perform banking operations.	Shahed Ali	##########	عميلنا العزيز، نأمل منك تزويدنا بالملاحظة التي تواجهك عبر البريد الإلكتروني info@riyadbank.com أو يمكنك التواصل معنا على الرقم 8001242225 لنتمكن من خدمتك.	##########	0	ar	us		1	ar	request bank card al riyadh bank havent receive use yet reason application doesnt allow access perform bank operations	Negative	0	1	0
Google Play Store	8c97125f-3415-4e58-b353-15473306aa08	Bad application from the worst bank, it doesn't open. I have submitted multiple complaints and the problem has not been resolved. Our work and lives have been disrupted because of the application of the Riyadh Bank.	Saeed Ss	##########	عميلنا العزيز، نأسف لسماع ذلك ونأمل منك تزويدنا بالملاحظة التي تواجهك عبر البريد الإلكتروني info@riyadbank.com أو يمكنك التواصل معنا على الرقم 8001242225 لنتمكن من خدمتك.	##########	0	ar	us		1	ar	bad application bad bank doesnt open submit multiple complaints problem resolve work live disrupt application riyadh bank	Negative	1	1	0
Google Play Store	bbea7f73-443b-4f76-b926-ed677a03b322	Good.	يعقوب بير	##########			0	ar	us		4	ar	good	Positive	0	0	0
Google Play Store	a9b6a034-edad-4b7f-aeff-284c4cc71190	The application, after the latest update, does not allow me to access it even though I have activated the location service. The truth is that the update has made the situation difficult.	صهيب يماني	##########	عميلنا العزيز، يؤسفنا سماع ذلك ونأمل منك التواصل معنا على الرقم 8001242225 أو من خلال البريد الإلكتروني info@riyadbank.com و تزويدنا بملاحظاتك لنتمكن من خدمتك بشكل أفضل.	##########	2	ar	us		1	ar	application late update allow access even though activate location service truth update make situation difficult	Negative	1	1	0
Google Play Store	9f337879-b5f2-41c0-a466-985583868718	Excellent.	معوض عويض	##########			0	ar	us		5	ar	excellent	Positive	0	0	0
Google Play Store	2a5cb68b-0419-4e2a-8640-db7ee98e9acd	The new update has become very very bad. Every time it asks for location permission and even after opening the website, it doesn't work despite multiple attempts. We hope for improvement.	Eslam Aadel	##########	عميلنا العزيز، يؤسفنا سماع ذلك ونأمل منك التواصل معنا على الرقم 8001242225 أو من خلال البريد الإلكتروني info@riyadbank.com و تزويدنا بملاحظاتك لنتمكن من خدمتك بشكل أفضل.	##########	3	ar	us		1	ar	new update become bad every time ask location permission even open website doesnt work despite multiple attempt hope improvement	Negative	1	1	0
Google Play Store	344e1eda-284a-4cc8-aff2-7999b6f11f36	Very bad.	ماجد البشر	##########	عميلنا العزيز، يؤسفنا سماع ذلك ونأمل منك التواصل معنا على الرقم 8001242225 أو من خلال البريد الإلكتروني info@riyadbank.com و تزويدنا بملاحظاتك لنتمكن من خدمتك بشكل أفضل.	##########	0	ar	us		1	ar	bad	Negative	1	0	0
Google Play Store	375218c6-5f98-43ad-ade5-0caf82efb3ad	The application is very bad, after the update they fixed it, it doesn't open anywhere.	Eman Bsrawi	##########	عميلنا العزيز، يؤسفنا سماع ذلك ونأمل منك التواصل معنا على الرقم 8001242225 أو من خلال البريد الإلكتروني info@riyadbank.com و تزويدنا بملاحظاتك لنتمكن من خدمتك بشكل أفضل.	##########	0	ar	us		1	ar	application bad update fix doesnt open anywhere	Negative	1	1	0
Google Play Store	f65d8092-11a9-460e-9491-4b3829f1ef44	It is not working and it asks you to open the website and then it still doesn't work. Please fix the problem as soon as possible.	D. H Jockey	##########	عميلنا العزيز، نأمل منك التواصل معنا على الرقم 8001242225 أو من خلال البريد الإلكتروني info@riyadbank.com و تزويدنا بملاحظاتك لنتمكن من خدمتك بشكل أفضل.	##########	0	ar	us		3	ar	work ask open website still doesnt work please fix problem soon possible	Negative	0	1	0
Google Play Store	fe9edbe2-fb4f-4cc6-98c0-0560b993f807	Trash from a bank, from an application, from management, by God, it's the biggest mistake of my life to open an account with them. I'd rather put my money in a piggy bank than keep it with them. The problem is that they are all trash, nobody responds to you.	امين العطاس	##########	عميلنا العزيز، يؤسفنا سماع ذلك ونأمل منك التواصل معنا على الرقم 8001242225 أو من خلال البريد الإلكتروني info@riyadbank.com و تزويدنا بملاحظاتك لنتمكن من خدمتك بشكل أفضل.	##########	0	ar	us		1	ar	trash bank application management god big mistake life open account id rather put money piggy bank keep problem trash nobody respond	Negative	1	0	0
Google Play Store	baf891c6-1da9-43ae-b67f-a7d16549d32e	The application is very, very, very, very bad. Please deactivate the location activation. When I log in to my account, a site activation box appears, even though I have already activated the site. I have deleted the application and reinstalled it, but there was no result. Please solve this problem.	Mayada Alzeed	##########	عميلنا العزيز، يؤسفنا سماع ذلك ونأمل منك التواصل معنا على الرقم 8001242225 أو من خلال البريد الإلكتروني info@riyadbank.com و تزويدنا بملاحظاتك لنتمكن من خدمتك بشكل أفضل.	##########	2	ar	us		1	ar	application bad please deactivate location activation log account site activation box appear even though already activate site delete application reinstall result please solve problem	Negative	1	1	0
Google Play Store	88c7d93a-346a-48e9-ba8b-5e58437bc14e	The application, after the latest update, requests permission to access the location, and when granted, the update does not work, it fails miserably.	Alshehri	##########	عميلنا العزيز، يؤسفنا سماع ذلك ونأمل منك التواصل معنا على الرقم 8001242225 أو من خلال البريد الإلكتروني info@riyadbank.com و تزويدنا بملاحظاتك لنتمكن من خدمتك بشكل أفضل.	##########	0	ar	us		1	ar	application late update request permission access location grant update work fail miserably	Negative	0	1	0
Google Play Store	c1f67e3e-e033-4947-a4c2-d450f1b9ce09	After the new update, I cannot add a new beneficiary or access my accounts. So what is the use of the online service of Bank Al Riyadh if I cannot manage my account? Please clarify this without having to uninstall and reinstall it.	الاستاذة صديقة الخزعل	##########	عميلنا العزيز، نأمل منك التواصل معنا على الرقم 8001242225 أو من خلال البريد الإلكتروني info@riyadbank.com و تزويدنا بملاحظاتك لنتمكن من خدمتك بشكل أفضل.	##########	0	ar	us		1	ar	new update add new beneficiary access account use online service bank al riyadh manage account please clarify without uninstall reinstall	Negative	0	1	0
Google Play Store	b74c3876-1424-486e-b105-a4cab7df0a28	The update is bad and the program doesn't want to work.	MOhamed Alshwadfy	##########	عميلنا العزيز، يؤسفنا سماع ذلك ونأمل منك التواصل معنا على الرقم 8001242225 أو من خلال البريد الإلكتروني info@riyadbank.com و تزويدنا بملاحظاتك لنتمكن من خدمتك بشكل أفضل.	##########	0	ar	us		5	ar	update bad program doesnt want work	Negative	1	1	0
Google Play Store	156fe955-5464-4586-9fb2-cdba879dd658	Bad experience, it doesn't open and logging in is difficult and impractical.	Mishal M	##########	عميلنا العزيز، يؤسفنا سماع ذلك ونأمل منك التواصل معنا على الرقم 8001242225 أو من خلال البريد الإلكتروني info@riyadbank.com و تزويدنا بملاحظاتك لنتمكن من خدمتك بشكل أفضل.	##########	0	ar	us		1	ar	bad experience doesnt open log difficult impractical	Negative	1	1	1
Google Play Store	3afe41ec-ea7d-4736-a183-0ae76706df59	Very bad and we are unable to access our accounts.	ابوعمر	##########	عميلنا العزيز، يؤسفنا سماع ذلك ونأمل منك التواصل معنا على الرقم 8001242225 أو من خلال البريد الإلكتروني info@riyadbank.com و تزويدنا بملاحظاتك لنتمكن من خدمتك بشكل أفضل.	##########	0	ar	us		1	ar	bad unable access account	Negative	1	1	0
Google Play Store	3b4fccd5-d146-4f81-a9f1-429be0e29bf3	Very bad after the update.	Mohd Mohd	##########	عميلنا العزيز، يؤسفنا سماع ذلك ونأمل منك التواصل معنا على الرقم 8001242225 أو من خلال البريد الإلكتروني info@riyadbank.com و تزويدنا بملاحظاتك لنتمكن من خدمتك بشكل أفضل.	##########	0	ar	us		1	ar	bad update	Negative	1	0	0
Google Play Store	ba04be13-ab04-43e7-97ee-9a16069d55af	The application is very exhausting / tiring.	Dr. Abdel Moneim	##########	عميلنا العزيز، يؤسفنا سماع ذلك ونأمل منك التواصل معنا على الرقم 8001242225 أو من خلال البريد الإلكتروني info@riyadbank.com و تزويدنا بملاحظاتك لنتمكن من خدمتك بشكل أفضل.	##########	0	ar	us		1	ar	application exhaust tire	Negative	1	0	0
Google Play Store	79081db0-4c5c-4a87-a9b9-4068266f13d5	the worst application	Bashir Fifi	##########	عميلنا العزيز، يؤسفنا سماع ذلك ونأمل منك التواصل معنا على الرقم 8001242225 أو من خلال البريد الإلكتروني info@riyadbank.com و تزويدنا بملاحظاتك لنتمكن من خدمتك بشكل أفضل.	##########	0	ar	us		2	ar	bad application	Negative	1	0	0
Google Play Store	71356f01-fa28-44d2-b019-cecd938dd143	The latest update is very bad as an error message appears allowing site access.	Moosh Shurrab	##########	عميلنا العزيز، نأسف لسماع ذلك ونأمل منك تزويدنا بالملاحظة التي تواجهك عبر البريد الإلكتروني info@riyadbank.com أو يمكنك التواصل معنا على الرقم 8001242225 لنتمكن من خدمتك.	##########	1	ar	us		1	ar	late update bad error message appear allow site access	Negative	1	1	0
Google Play Store	b3cd9457-152b-4fc1-8af3-f3d2b8762c2d	The old one is better. It is necessary to change either the device or the bank. What is the solution? The website is activated when using the application, but the application does not open. We need a quick solution. We pay all our payments and bills through the application. Please provide a fast solution.	محمد رضوان	##########	عميلنا العزيز، نأسف لسماع ذلك ونأمل منك تزويدنا بالملاحظة التي تواجهك عبر البريد الإلكتروني info@riyadbank.com أو يمكنك التواصل معنا على الرقم 8001242225 لنتمكن من خدمتك.	##########	0	ar	us		1	ar	old one good necessary change either device bank solution website activate use application application open need quick solution pay payments bill application please provide fast solution	Negative	1	1	0
Google Play Store	8bb8183d-aa64-4358-b570-4593d5ac69a3	Very hot weather	معصومه ربيع	##########	عميلنا العزيز، نأسف لسماع ذلك ونأمل منك تزويدنا بالملاحظة التي تواجهك عبر البريد الإلكتروني info@riyadbank.com أو يمكنك التواصل معنا على الرقم 8001242225 لنتمكن من خدمتك.	##########	0	ar	us		1	ar	hot weather	Neutral	1	0	0
Google Play Store	e4a5d38b-4e1f-4b62-bfcf-a13d274ca442	There is a problem with the website permissions, it asks for activation and when activated, it refuses access for the same reason.	ماجد الهفوفي	##########	عميلنا العزيز، يؤسفنا سماع ذلك ونأمل منك التواصل معنا على الرقم 8001242225 أو من خلال البريد الإلكتروني info@riyadbank.com و تزويدنا بملاحظاتك لنتمكن من خدمتك بشكل أفضل.	##########	0	ar	us		1	ar	problem website permissions ask activation activate refuse access reason	Negative	0	1	0
Google Play Store	f441919a-b17c-4bc2-a78c-dca9d58c6d36	After activating the website, the application no longer opens, despite the activation. Sadly, the application has become poor. We hope to solve the problem.	عبدالله الفيفي	##########	عميلنا العزيز، يؤسفنا سماع ذلك ونأمل منك التواصل معنا على الرقم 8001242225 أو من خلال البريد الإلكتروني info@riyadbank.com و تزويدنا بملاحظاتك لنتمكن من خدمتك بشكل أفضل.	##########	1	ar	us		1	ar	activate website application long open despite activation sadly application become poor hope solve problem	Negative	1	1	0
Google Play Store	009f1d28-c1a4-4c7b-9723-8629aab7f415	The worst application, no competition.	عمر علي	##########	عميلنا العزيز، يؤسفنا سماع ذلك ونأمل منك التواصل معنا على الرقم 8001242225 أو من خلال البريد الإلكتروني info@riyadbank.com و تزويدنا بملاحظاتك لنتمكن من خدمتك بشكل أفضل.	##########	0	ar	us		1	ar	bad application competition	Negative	1	0	0
Google Play Store	e1cc74b6-3b2d-414c-a697-c24ac919a419	Excellent	Hanan Alhrbi	##########			0	ar	us		5	ar	excellent	Positive	0	0	0
Google Play Store	4521c301-1fc4-4808-8229-c728741e5aa5	After changing the password, the problem with the website permission has been solved.	Sayed Mady	##########	عميلنا العزيز، نأمل منك تزويدنا بالملاحظة التي تواجهك عبر البريد الإلكتروني info@riyadbank.com أو يمكنك التواصل معنا على الرقم 8001242225 لنتمكن من خدمتك.	##########	0	ar	us		4	ar	change password problem website permission solve	Neutral	0	1	0
Google Play Store	9436392f-f810-4c41-814e-25db6796b396	Excellent.	أ حمد البحاري	##########			0	ar	us		5	ar	excellent	Positive	0	0	0
Google Play Store	9d56b64c-83f5-40ac-baa5-6ab845018596	"Excellent application, but every user must restart their mobile phone again. This is regarding most customers who indicated that the bank's website is bad and requesting location is very easy. Also, the app is extremely excellent."	Mm Pp	##########	عميلنا العزيز، سعدنا بتواصلك معنا.	##########	2	ar	us		5	ar	excellent application every user must restart mobile phone regard customers indicate bank website bad request location easy also app extremely excellent	Positive	1	1	0
Google Play Store	01a61022-b9d0-46ae-b0a4-dd20c8191cdc	After the new update, it does not open and requests location identification.	ahmad ss	##########	عميلنا العزيز، نأمل منك التواصل معنا على الرقم 8001242225 أو من خلال البريد الإلكتروني info@riyadbank.com و تزويدنا بملاحظاتك لنتمكن من خدمتك بشكل أفضل.	##########	0	ar	us		1	ar	new update open request location identification	Negative	0	1	0
Google Play Store	6947abde-7536-4f39-9021-d81218f0ed4b	The application is bad.	ابومروان العاتي	##########	عميلنا العزيز، يؤسفنا سماع ذلك ونأمل منك التواصل معنا على الرقم 920002470 أو من خلال البريد الإلكتروني info@riyadbank.com و تزويدنا بملاحظاتك لنتمكن من خدمتك بشكل أفضل.	##########	0	ar	us		4	ar	application bad	Negative	1	0	0
Google Play Store	7e194144-3620-4b5f-9fa3-48fef69712c9	The application has become very bad after the update. It asks to enable the location, and if I enter the password, it does not allow me to access my account. The website says it's an error, and if I try again, it says I have to reset. I will see if the situation remains the same; I will transfer my salary to Al Rajhi Bank and get rid of Riyadh Bank application problems. Riyadh Bank application us…	Abo Rian	##########	عميلنا العزيز، يؤسفنا سماع ذلك ونأمل منك التواصل معنا على الرقم 8001242225 أو من خلال البريد الإلكتروني info@riyadbank.com و تزويدنا بملاحظاتك لنتمكن من خدمتك بشكل أفضل.	##########	1	ar	us		1	ar	application become bad update ask enable location enter password allow access account website say error try say reset see situation remain transfer salary al rajhi bank get rid riyadh bank application problems riyadh bank application use easy smooth wish hadnt open account	Negative	1	1	0
Google Play Store	4f1c8d14-d3e4-4e51-b7d4-15ea5ad50e24	One of the worst applications and worst banks. When you enter the username and password, it tells you there is an error, asking you to reset the password and create a new user. The problem is that the application only works sometimes and it disconnects while you're using it. It's disabling people's services. You want to transfer or make a payment, but the application doesn't work. How long will t…	سمر الشاعر	##########			0	ar	us		1	ar	one bad applications bad bank enter username password tell error ask reset password create new user problem application work sometimes disconnect youre use disable people service want transfer make payment application doesnt work long continue shame star rat dont recommend application bank cooperation bad customers dont send email excuse want username current password im tire excuse muslims even …	Negative	1	1	0
Google Play Store	96bd4ea4-40ed-4619-a0c9-eddccb89c8b2	Good	مهدي الهلال	##########			0	ar	us		5	ar	good	Positive	0	0	0
Google Play Store	91fc2750-5d26-441e-a0e5-63a69338bd8c	The latest update regarding the founding day of the application is not worth a single riyal. I am surprised that a bank like Al Riyadh Bank is unable to implement a new update and solve the login problems for the beneficiaries.	trnido omrani	##########	عميلنا العزيز، نأسف لسماع ذلك ونأمل منك تزويدنا بالملاحظة التي تواجهك عبر البريد الإلكتروني info@riyadbank.com أو يمكنك التواصل معنا على الرقم 8001242225 لنتمكن من خدمتك.	##########	0	ar	us		1	ar	late update regard found day application worth single riyal surprise bank like al riyadh bank unable implement new update solve login problems beneficiaries	Negative	1	1	0
Google Play Store	9e583934-a2a1-4c37-a882-61e68f87c4df	One of the dirtiest banks	ابو فهد	##########	عميلنا العزيز، نأسف لسماع ذلك ونأمل منك تزويدنا بالملاحظة التي تواجهك عبر البريد الإلكتروني info@riyadbank.com أو يمكنك التواصل معنا على الرقم 8001242225 لنتمكن من خدمتك.	##########	0	ar	us		1	ar	one dirty bank	Negative	1	0	0
Google Play Store	ac06521c-2108-4d14-814e-d028efb54efc	The latest update has become very problematic for me. It does not open at all and asks to open the PC. If I open it, it says an error occurred. Please fix the problem. Thank you.	ابوعصام الكهالي	##########	عميلنا العزيز، نأسف لسماع ذلك ونأمل منك تزويدنا بالملاحظة التي تواجهك عبر البريد الإلكتروني info@riyadbank.com أو يمكنك التواصل معنا على الرقم 8001242225 لنتمكن من خدمتك.	##########	0	ar	us		3	ar	late update become problematic open ask open pc open say error occur please fix problem thank	Negative	1	1	0
Google Play Store	1c7d9b6d-7565-44fd-a509-3ad8f5bfb1de	The application doesn't open and asks me for permission to access the location, even though I have already enabled access to the location. Every day it is the same way, unfortunately it has become very bad.	انس عبدالناصر	##########	عميلنا العزيز، يؤسفنا سماع ذلك ونأمل منك مشاركتنا ملاحظتك من خلال التواصل على الرقم 8001242225 أو عبر البريد الالكتروني info@riyadbank.com و سيتم النظر في الملاحظة بعين الاعتبار	##########	0	ar	us		1	ar	application doesnt open ask permission access location even though already enable access location every day way unfortunately become bad	Negative	1	1	0
Google Play Store	7df2cd6c-59a9-4769-94cc-2c35e71a7c26	I do not recommend dealing with Al-Riyadh Bank based on personal experience, and they do not deserve even one star.	عبدالله الشهري	##########			0	ar	us		1	ar	recommend deal alriyadh bank base personal experience deserve even one star	Negative	1	0	0
Google Play Store	0f4570ca-928e-461d-8b59-75d93e9e201a	After updating the program, it is no longer as it used to be. It cannot be easily used most of the time; it hangs and unfortunately, it does not open the website.	وديعه سعيد	##########	عميلنا العزيز، يؤسفنا سماع ذلك ونأمل منك مشاركتنا ملاحظتك من خلال التواصل على الرقم 8001242225 أو عبر البريد الالكتروني info@riyadbank.com و سيتم النظر في الملاحظة بعين الاعتبار	##########	10	ar	us		2	ar	update program long use easily use time hang unfortunately open website	Negative	0	1	1
Google Play Store	bce6d966-2468-4fa3-b0df-18c24df2332f	Very beautiful, but the new update is baaaaad.	هيثم الدربي	##########			1	ar	us		4	ar	beautiful new update baaaaad	Positive	1	0	0
Google Play Store	e35ae07a-610f-4db2-a8fa-1fe5f0701810	Excellent.	ابراهيم	##########			0	ar	us		4	ar	excellent	Positive	0	0	0
Google Play Store	8ba812d3-aaa6-4d70-9ea0-7ee8171859df	Excellent, mashallah, tabarak allah.	ام مشعل	##########			0	ar	us		5	ar	excellent mashallah tabarak allah	Positive	0	0	0
Google Play Store	5300d19e-9397-47aa-a1a6-593a92b654f3	Bad experience	عائشه الحمر	##########			1	ar	us		2	ar	bad experience	Negative	1	0	0
Google Play Store	e0c70f67-0914-4c0e-8e77-0e3b9680b167	The update is bad, it's the same problem that everyone is experiencing. The website is working for me, but for others who claim it's closed and reopened, it opens with them. I tried doing it myself, but it's still the same and nothing has changed.	eman naef	##########	عميلنا العزيز، يؤسفنا سماع ذلك ونأمل منك مشاركتنا ملاحظتك من خلال التواصل على الرقم 8001242225 أو عبر البريد الالكتروني info@riyadbank.com و سيتم النظر في الملاحظة بعين الاعتبار	##########	1	ar	us		1	ar	update bad problem everyone experience website work others claim close reopen open try still nothing change	Negative	1	1	0
Google Play Store	dea95d8d-b826-4d15-aed7-da0b8c180116	Very bad problem with entry, it says website error.	Om Ran	##########	عميلنا العزيز، يؤسفنا سماع ذلك ونأمل منك مشاركتنا ملاحظتك من خلال التواصل على الرقم 8001242225 أو عبر البريد الالكتروني info@riyadbank.com و سيتم النظر في الملاحظة بعين الاعتبار	##########	1	ar	us		1	ar	bad problem entry say website error	Negative	1	1	0
Google Play Store	2f82b4b8-043c-4541-8c68-a9c5f471a67a	The app no longer works, it asks for permission to access the location and I have allowed it, but my Huawei phone still does not work.	راكان العتيبي	##########	عميلنا العزيز، يؤسفنا سماع ذلك ونأمل منك مشاركتنا ملاحظتك من خلال التواصل على الرقم 8001242225 أو عبر البريد الالكتروني info@riyadbank.com و سيتم النظر في الملاحظة بعين الاعتبار	##########	0	ar	us		1	ar	app long work ask permission access location allow huawei phone still work	Negative	0	1	0
Google Play Store	5626a39f-b82d-4c20-b855-bdb6ea85e58c	The problem is why the application insists on enabling the geolocation feature every time I try to log in? It is a waste of time without any significant benefit. Please disable this useless option to facilitate the login process for customers. Thank you.	النجم Star	##########	عميلنا العزيز،نأمل منك مشاركتنا ملاحظتك من خلال التواصل على الرقم 8001242225 أو عبر البريد الالكتروني info@riyadbank.com و سيتم النظر في الملاحظة بعين الاعتبار	##########	45	ar	us		2	ar	problem application insist enable geolocation feature every time try log waste time without significant benefit please disable useless option facilitate login process customers thank	Negative	0	1	0
Google Play Store	938e4755-2e38-4c70-b44a-2a7c70547775	Excellent	Ahmed Abdulrahem	##########			0	ar	us		4	ar	excellent	Positive	0	0	0
Google Play Store	f6103ad0-7773-4bba-876b-36cb1c7188a6	The application is not working. It is saying that the location settings are the same and have not changed. Hopefully, the problem can be resolved. A big bank doesn't know how to fix the error.	Roma Zooz	##########	عميلنا العزيز، يؤسفنا سماع ذلك ونأمل منك مشاركتنا ملاحظتك من خلال التواصل على الرقم 8001242225 أو عبر البريد الالكتروني info@riyadbank.com و سيتم النظر في الملاحظة بعين الاعتبار	##########	0	ar	us		1	ar	application work say location settings change hopefully problem resolve big bank doesnt know fix error	Negative	0	1	0
Google Play Store	9a0083f1-245c-4d2d-8ede-3b04869680d7	Wonderful	أكرم الشيخ	##########			0	ar	us		5	ar	wonderful	Positive	0	0	0
Google Play Store	b7dd9466-95e5-406b-837a-62c2da1e0b9a	After the latest update, it has become garbage and it's driving me crazy.	سلطان 33	##########	عميلنا العزيز، يؤسفنا سماع ذلك ونأمل منك مشاركتنا ملاحظتك من خلال التواصل على الرقم 8001242225 أو عبر البريد الالكتروني info@riyadbank.com و سيتم النظر في الملاحظة بعين الاعتبار	##########	0	ar	us		5	ar	late update become garbage drive crazy	Negative	1	0	1
Google Play Store	cb37285c-e8d0-4a23-9d32-eb165ebee743	The application refuses to open and asks for location permission, and even after granting permission, it still does not work.	SYA SYA	##########	عميلنا العزيز، نأمل منك مشاركتنا ملاحظتك من خلال التواصل على الرقم 8001242225 أو عبر البريد الالكتروني info@riyadbank.com و سيتم النظر في الملاحظة بعين الاعتبار	##########	0	ar	us		2	ar	application refuse open ask location permission even grant permission still work	Negative	0	1	0
Google Play Store	e1a6c482-d17b-4aec-8fbe-37f7a5ee5ea1	The latest update is very bad because of the location permission. It means that if I'm outside the house, it doesn't open for me. I have to be at home for it to open and recognize the location.	Maged ـ	##########	عميلنا العزيز، يؤسفنا سماع ذلك ونأمل منك مشاركتنا ملاحظتك من خلال التواصل على الرقم 8001242225 أو عبر البريد الالكتروني info@riyadbank.com و سيتم النظر في الملاحظة بعين الاعتبار	##########	0	ar	us		1	ar	late update bad location permission mean im outside house doesnt open home open recognize location	Negative	1	1	0
Google Play Store	cdf70a33-956d-49a6-8204-01c3241b6df2	Since March 15th, the application has been refusing to open on the mobile and requesting access to the location, even though the location permission is enabled. I hope to find a solution for this malfunction in the banking application.	نبيه العطرجي	##########	عميلنا العزيز، يؤسفنا سماع ذلك ونأمل منك مشاركتنا ملاحظتك من خلال التواصل على الرقم 8001242225 أو عبر البريد الالكتروني info@riyadbank.com و سيتم النظر في الملاحظة بعين الاعتبار	##########	0	ar	us		1	ar	since march th application refuse open mobile request access location even though location permission enable hope find solution malfunction bank application	Negative	0	1	0
Google Play Store	43f66952-43c2-4feb-b87c-7bd074b1071c	Why didn't the program work?	Ali Shlil	##########	عميلنا العزيز، يؤسفنا سماع ذلك ونأمل منك مشاركتنا ملاحظتك من خلال التواصل على الرقم 8001242225 أو عبر البريد الالكتروني info@riyadbank.com و سيتم النظر في الملاحظة بعين الاعتبار	##########	0	ar	us		5	ar	didnt program work	Negative	0	1	0
Google Play Store	b7154000-d784-4fd4-859a-c71e2cf31e69	"Very beautiful application"	جلكسي الجنوب	##########			0	ar	us		5	ar	beautiful application	Positive	0	0	0
Google Play Store	97a9d9ea-ece5-4f46-af9f-8e4d3c16e169	The application is a the worst, it doesn't work and never opens. The big problem is that it is an application for Riyadh Bank.	LOAI ALOTHAIM	##########	عميلنا العزيز، يؤسفنا سماع ذلك ونأمل منك مشاركتنا ملاحظتك من خلال التواصل على الرقم 8001242225 أو عبر البريد الالكتروني info@riyadbank.com و سيتم النظر في الملاحظة بعين الاعتبار	##########	0	ar	us		1	ar	application bad doesnt work never open big problem application riyadh bank	Negative	1	1	0
Google Play Store	7e0c88a6-76aa-4bf5-b8b8-deac89a8dd5e	Unfortunately, there is severe distress in dealing with the application.	Hussinmurad MM	##########	عميلنا العزيز، يؤسفنا سماع ذلك ونأمل منك مشاركتنا ملاحظتك من خلال التواصل على الرقم 8001242225 أو عبر البريد الالكتروني info@riyadbank.com و سيتم النظر في الملاحظة بعين الاعتبار	##########	0	ar	us		1	ar	unfortunately severe distress deal application	Negative	1	0	0
Google Play Store	854a3f0d-3dbd-475c-83c6-619a8a34d71f	Excellent transaction and service, and their money is new.	مختار محمد	##########			1	ar	us		5	ar	excellent transaction service money new	Positive	1	0	0
Google Play Store	832c3826-7c69-412e-9392-5ad0c81b49c5	Bad application and a lousy bank! We rely on God and He is the best avenger against you.	Nofa Nas	##########	عميلنا العزيز، يؤسفنا سماع ذلك ونأمل منك مشاركتنا ملاحظتك من خلال التواصل على الرقم 8001242225 أو عبر البريد الالكتروني info@riyadbank.com و سيتم النظر في الملاحظة بعين الاعتبار	##########	1	ar	us		1	ar	bad application lousy bank rely god best avenger	Negative	1	0	0
Google Play Store	5b80d322-3082-45e5-8362-ced5abe4ff34	What is the solution with this application? We deal with a different bank.	راقي الحرف	##########	عميلنا العزيز، يؤسفنا سماع ذلك ونأمل منك مشاركتنا ملاحظتك من خلال التواصل على الرقم 8001242225 أو عبر البريد الالكتروني info@riyadbank.com و سيتم النظر في الملاحظة بعين الاعتبار	##########	1	ar	us		1	ar	solution application deal different bank	Negative	1	0	0
Google Play Store	212bf991-19c1-4138-8f01-0d78060ff97f	The application is not working.	حسين عبد الوهاب	##########	عميلنا العزيز، يؤسفنا سماع ذلك ونأمل منك مشاركتنا ملاحظتك من خلال التواصل على الرقم 8001242225 أو عبر البريد الالكتروني info@riyadbank.com و سيتم النظر في الملاحظة بعين الاعتبار	##########	0	ar	us		1	ar	application work	Negative	0	1	0
Google Play Store	5991e7a1-5bc6-45df-9cae-e63224325220	Distinctive or special	Naif Alrashidi	##########			0	ar	us		5	ar	distinctive special	Neutral	0	0	0
Google Play Store	a55a81aa-de47-44dd-9c99-02e1c359e5e1	We are facing a problem entering the application after the latest update, and the reason is activating the location access. Although permission has been granted to enable location access, it is still refusing entry.	محمد سعد	##########	عميلنا العزيز، يؤسفنا سماع ذلك ونأمل منك مشاركتنا ملاحظتك من خلال التواصل على الرقم 8001242225 أو عبر البريد الالكتروني info@riyadbank.com و سيتم النظر في الملاحظة بعين الاعتبار	##########	1	ar	us		1	ar	face problem enter application late update reason activate location access although permission grant enable location access still refuse entry	Negative	0	1	0
Google Play Store	f6923344-2f98-46b9-9d76-d57ed1177afb	Excellent application	mohamed fathy	##########			0	ar	us		5	ar	excellent application	Positive	0	0	0
Google Play Store	86195977-3fc5-4280-a18f-38f3c6e18b10	After the latest update, the application doesn't open. It tells me to activate the location. Please solve the problem.	ندى السلطان	##########	عميلنا العزيز، يؤسفنا سماع ذلك ونأمل منك مشاركتنا ملاحظتك من خلال التواصل على الرقم 8001242225 أو عبر البريد الالكتروني info@riyadbank.com و سيتم النظر في الملاحظة بعين الاعتبار	##########	0	ar	us		3	ar	late update application doesnt open tell activate location please solve problem	Negative	0	1	0
Google Play Store	b8cd5d16-0f8c-47cc-856a-ee18a334df84	The entire time is bad, the website shows that it's running but I tried to operate it from the settings and the same problem, the application is not working.	Ahmed_ Am	##########	عميلنا العزيز، يؤسفنا سماع ذلك ونأمل منك مشاركتنا ملاحظتك من خلال التواصل على الرقم 8001242225 أو عبر البريد الالكتروني info@riyadbank.com و سيتم النظر في الملاحظة بعين الاعتبار	##########	1	ar	us		1	ar	entire time bad website show run try operate settings problem application work	Negative	1	1	0
Google Play Store	40c303b6-998a-4d91-8fb9-4838e6ebc027	Very bad after the update, it asks for permission for the website, even though it is already enabled correctly.	Reem Mohammed	##########	عميلنا العزيز، يؤسفنا سماع ذلك ونأمل منك مشاركتنا ملاحظتك من خلال التواصل على الرقم 8001242225 أو عبر البريد الالكتروني info@riyadbank.com و سيتم النظر في الملاحظة بعين الاعتبار	##########	0	ar	us		1	ar	bad update ask permission website even though already enable correctly	Negative	1	1	0
Google Play Store	382db7ee-ef51-4678-ad79-8db8b954cb3e	The application has not been working for a week. It asks for location activation, and even after activating the location service, it still doesn't work.	Sa 11	##########	عميلنا العزيز، يؤسفنا سماع ذلك ونأمل منك مشاركتنا ملاحظتك من خلال التواصل على الرقم 8001242225 أو عبر البريد الالكتروني info@riyadbank.com و سيتم النظر في الملاحظة بعين الاعتبار	##########	1	ar	us		1	ar	application work week ask location activation even activate location service still doesnt work	Negative	0	1	0
Google Play Store	40c4052d-1e80-4153-ae5d-782152a3f6b9	The application has not been working for 4 or 5 days.	سعد أحمد	##########	عميلنا العزيز، يؤسفنا سماع ذلك ونأمل منك مشاركتنا ملاحظتك من خلال التواصل على الرقم 8001242225 أو عبر البريد الالكتروني info@riyadbank.com و سيتم النظر في الملاحظة بعين الاعتبار	##########	0	ar	us		3	ar	application work days	Negative	0	1	0
Google Play Store	b3b224f1-816c-429b-8e5f-4d079231f016	What's the deal after the update? The website is saying I don't know what and it won't let me log in.	عايض التركي (بواحمد)	##########	عميلنا العزيز، يؤسفنا سماع ذلك ونأمل منك مشاركتنا ملاحظتك من خلال التواصل على الرقم 8001242225 أو عبر البريد الالكتروني info@riyadbank.com و سيتم النظر في الملاحظة بعين الاعتبار	##########	0	ar	us		1	ar	whats deal update website say dont know wont let log	Negative	0	1	0
Google Play Store	83ea4ca3-19e7-4b67-857b-b297b69a97b9	I am very, very upset after the update.	عمر السبيعي	##########	عميلنا العزيز، يؤسفنا سماع ذلك ونأمل منك التواصل معنا على الرقم 8001242225 أو من خلال البريد الإلكتروني info@riyadbank.com و تزويدنا بملاحظاتك لنتمكن من خدمتك بشكل أفضل.	##########	0	ar	us		1	ar	upset update	Negative	1	0	0
Google Play Store	69ce5705-2ccd-4808-85a2-15bc23c2c849	"Unable to access and it gives an error message on the website."	Khalaaf Dergham	##########	عميلنا العزيز، يؤسفنا سماع ذلك ونأمل منك التواصل معنا على الرقم 8001242225 أو من خلال البريد الإلكتروني info@riyadbank.com و تزويدنا بملاحظاتك لنتمكن من خدمتك بشكل أفضل.	##########	0	ar	us		1	ar	unable access give error message website	Negative	0	1	0
Google Play Store	2d77629c-7c75-46f4-a76d-80c8eed9c261	The application is very slow, and it also shows you a wrong location arrival message... The old one is better and faster... I contacted the toll-free number and the problem still persists... Perhaps there is a technical issue with the application.	Mr. Mohammed Alawi	##########	عميلنا العزيز، يؤسفنا سماع ذلك ونأمل منك التواصل معنا على الرقم 8001242225 أو من خلال البريد الإلكتروني info@riyadbank.com و تزويدنا بملاحظاتك لنتمكن من خدمتك بشكل أفضل.	##########	5	ar	us		1	ar	application slow also show wrong location arrival message old one good fast contact tollfree number problem still persist perhaps technical issue application	Negative	1	1	1
Google Play Store	e08b48fc-a675-4bc7-92ce-616e32db6109	With the latest update that happened, it's no longer worth it, I don't recommend anyone to use a bank like this. Because, believe me, it has too many unnecessary updates.	حاتم الحربي	##########			0	ar	us		1	ar	late update happen long worth dont recommend anyone use bank like believe many unnecessary update	Negative	1	0	0
Google Play Store	17939728-116c-49ce-b78f-8b81f786ba87	Thank youuu	Gozef Al ali	##########			0	ar	us		5	ar	thank youuu	Positive	0	0	0
Google Play Store	5e2f10b6-c5a4-4fcf-9f78-0b75ed3cf5d9	Why do you want to activate the website if the application doesn't open even after activating the website? I have to activate the website permission in the application. Very frustrating. It still doesn't open despite activating the website.	خالد محمد قمحاوي	##########	عميلنا العزيز، يؤسفنا سماع ذلك ونأمل منك التواصل معنا على الرقم 8001242225 أو من خلال البريد الإلكتروني info@riyadbank.com و تزويدنا بملاحظاتك لنتمكن من خدمتك بشكل أفضل.	##########	3	ar	us		1	ar	want activate website application doesnt open even activate website activate website permission application frustrate still doesnt open despite activate website	Negative	1	1	0
Google Play Store	869b3dd3-e937-4695-9f42-73e1229597bf	Open the system	Jameel Huzly	##########			0	ar	us		5	ar	open system	Neutral	0	1	0
Google Play Store	2d836dc9-6dad-42d9-af0a-f59a01624ade	He doesn't even deserve a single star... worse than bad. I filled out all the paperwork for him to accept, but it was useless. I would prefer to return it as before without the website's request. If the problem is not resolved, the pack will be changed and thank you.	Alsyda Zainb	##########	عميلنا العزيز، يؤسفنا سماع ذلك ونأمل منك التواصل معنا على الرقم 8001242225 أو من خلال البريد الإلكتروني info@riyadbank.com و تزويدنا بملاحظاتك لنتمكن من خدمتك بشكل أفضل.	##########	1	ar	us		1	ar	doesnt even deserve single star bad bad fill paperwork accept useless would prefer return without websites request problem resolve pack change thank	Negative	1	1	0
Google Play Store	e5892c84-42dc-4a64-b7ca-e5c98e035659	How do I describe my experience with your application? It is a terrible and unsuccessful application after the update. It asks me to enable location services and activate screen lock, and when I enter, it gives me an error on the website. This application is disabled, unsuccessful, and stupid. Well, my website is working and permissions are enabled. The Bank Al Rajhi application is better than yo…	rr_R5 13	##########	عميلنا العزيز، يؤسفنا سماع ذلك ونأمل منك التواصل معنا على الرقم 8001242225 أو من خلال البريد الإلكتروني info@riyadbank.com و تزويدنا بملاحظاتك لنتمكن من خدمتك بشكل أفضل.	##########	0	ar	us		1	ar	describe experience application terrible unsuccessful application update ask enable location service activate screen lock enter give error website application disable unsuccessful stupid well website work permissions enable bank al rajhi application good doesnt ask website screen lock activation nonsense	Negative	1	1	0
Google Play Store	c77b519b-4522-4f4d-985a-e799f0a403dd	Very bad	ماجد الفلفل	##########	عميلنا العزيز، يؤسفنا سماع ذلك ونأمل منك التواصل معنا على الرقم 8001242225 أو من خلال البريد الإلكتروني info@riyadbank.com و تزويدنا بملاحظاتك لنتمكن من خدمتك بشكل أفضل.	##########	0	ar	us		1	ar	bad	Negative	1	0	0
Google Play Store	bdee2d45-3375-436b-95c2-2a1875cc1843	After the latest update, and after making sure of all the required permissions, after entering the username and password, I receive a message that says "Allow access to the site! Error." Therefore, the application has become corrupted and please fix the problem as soon as possible. The phone is Huawei P30 Pro, running Android 11.	Medo X445	##########	عميلنا العزيز، يؤسفنا سماع ذلك ونأمل منك التواصل معنا على الرقم 8001242225 أو من خلال البريد الإلكتروني info@riyadbank.com و تزويدنا بملاحظاتك لنتمكن من خدمتك بشكل أفضل.	##########	57	ar	us		1	ar	late update make sure require permissions enter username password receive message say allow access site error therefore application become corrupt please fix problem soon possible phone huawei p pro run android	Negative	1	1	0
Google Play Store	25db01a1-8810-4655-8a84-ce77ced6c0f0	Bad update. See what's wrong with us.	طقطقه وضحك	##########	عميلنا العزيز، يؤسفنا سماع ذلك ونأمل منك التواصل معنا على الرقم 8001242225 أو من خلال البريد الإلكتروني info@riyadbank.com و تزويدنا بملاحظاتك لنتمكن من خدمتك بشكل أفضل.	##########	0	ar	us		1	ar	bad update see whats wrong us	Negative	1	0	0
Google Play Store	4a8c386d-96a1-4432-af98-b0c1d0758725	The latest update is miraculous, but my problem with the geographical site persists. My interests are disrupted due to the site permissions. If we don't allow the application to use the location, it refuses to access it. And if we do grant the application permission to access the location, there is an error. Is it a puzzle? Note that I have deleted the application and reinstalled it, but the same…	Flornsa Lwes	##########			4	ar	us		1	ar	late update miraculous problem geographical site persist interest disrupt due site permissions dont allow application use location refuse access grant application permission access location error puzzle note delete application reinstall problem remain solution	Negative	0	1	0
Google Play Store	f637a036-b855-4a6f-8a4a-70a6308670d8	Very bad.	بندر البلوي	##########			0	ar	us		1	ar	bad	Negative	1	0	0
Google Play Store	02a5374b-0f2e-474b-ad29-a322f0311575	The application has a problem; activating the location is not accepted, and therefore the service application does not work, causing the services to be disrupted, and we have to delay.	La Hu	##########			0	ar	us		1	ar	application problem activate location accept therefore service application work cause service disrupt delay	Negative	0	0	1
Google Play Store	cbccdce5-1548-4f44-a646-c5e2db554e45	Honestly, this application is bad. From time to time, it asks for an update, and I update it, but after a while, it tells me there is a new update. Honestly, it's annoying.	salim 4783	##########			0	ar	us		1	ar	honestly application bad time time ask update update tell new update honestly annoy	Negative	1	0	0
Google Play Store	944048bd-a3c7-4451-8d7a-e6ad4b42d786	There is a problem with the website, and I have been unable to log in since the latest update until today.	فلان الفلاني	##########			1	ar	us		1	ar	problem website unable log since late update today	Negative	0	1	0
Google Play Store	adef8599-38f0-47df-8155-0b569373ce85	Failed program, they returned to the old system, many banks did not stop with you.	العديم 2000	##########			0	ar	us		1	ar	fail program return old system many bank stop	Negative	0	1	0
Google Play Store	12f74d9f-d89d-4975-a77e-567fd6da0d51	I'm sorry, but "متزا" is not a complete word or phrase in Arabic. It seems to be a fragment or incomplete text. Can you please provide more context or a complete sentence for translation?	ابو دفاع	##########			0	ar	us		5	ar	im sorry complete word phrase arabic seem fragment incomplete text please provide context complete sentence translation	Negative	1	1	0
Google Play Store	599197e5-6f7d-481f-be0d-88030a1bb84a	After the latest update, the website asks me and says it didn't recognize the location. What is the solution?	بومحمود بومحمود	##########			0	ar	us		1	ar	late update website ask say didnt recognize location solution	Negative	0	1	0
Google Play Store	d2dff13d-e256-4d7c-870f-8d5908e175a0	Excellent, I swear (by Allah).	Azuz BaytAlebaa	##########			0	ar	us		5	ar	excellent swear allah	Positive	1	0	0
Google Play Store	3bf35058-9d22-4def-ac39-15d187904292	The application is not opening for me. It says I need to give permissions to the location. I click on "Agree" but the same problem persists.	فهد الدوسري	##########			0	ar	us		1	ar	application open say need give permissions location click agree problem persist	Negative	0	1	0
Google Play Store	13578507-9901-4307-af32-55cc59a8444b	The latest update is causing a login issue and despite contacting them via Twitter for over a week and a half, the problem remains unresolved.	saad aldosary	##########			1	ar	us		1	ar	late update cause login issue despite contact via twitter week half problem remain unresolved	Negative	0	1	0
Google Play Store	7499ed17-69bb-4b86-a053-09be4a9ffd77	During the process of converting to a credit card, it is not possible to make a purchase immediately. You have to wait for half a day.	Hdsh Dhd	##########			0	ar	us		2	ar	process convert credit card possible make purchase immediately wait half day	Negative	0	1	0
Google Play Store	19dc915e-6833-4a54-8d51-efe6f75ba183	Unfortunately, after the recent update, the website asks for activation more than ten times. I tried to activate it, but nothing is clear. Since the situation is like this, I will withdraw all the funds available in Riyadh Bank and look for another bank.	alahmari alahmari	##########			1	ar	us		1	ar	unfortunately recent update website ask activation ten time try activate nothing clear since situation like withdraw fund available riyadh bank look another bank	Negative	0	1	0
Google Play Store	111eaa9f-d923-49de-b47f-0515900233af	nice and excellent.	Jas	##########			0	ar	us		4	ar	nice excellent	Positive	0	0	0
Google Play Store	90075459-2a14-4128-8525-be476adcfae3	After the latest update, the application does not open due to the request for access to the location. I allowed the application full access to everything on the device, which is a big mistake. Even after that, it still doesn't open. I will delete the application to avoid being hacked and to protect my sensitive information. I will rely on direct interaction through the branch.	Walid Senosy	##########			3	ar	us		1	ar	late update application open due request access location allow application full access everything device big mistake even still doesnt open delete application avoid hack protect sensitive information rely direct interaction branch	Negative	1	1	0
Google Play Store	b31cfb92-1e45-4fb1-bd4b-499187dfa947	Very good	سالم الحربي	##########			0	ar	us		5	ar	good	Positive	0	0	0
Google Play Store	c2266cbf-8b88-44d0-a2b5-96a83f6af553	Problem with website service, please make the necessary adjustments.	دحيم بن محمد	##########			0	ar	us		3	ar	problem website service please make necessary adjustments	Negative	0	1	0
Google Play Store	03b891fa-0d32-4687-8df2-8db25788ba02	I had done the application through the Tawakkalna application and it worked well for me. They activated the website through Tawakkalna.👍	نادية أحمد	##########			0	ar	us		5	ar	do application tawakkalna application work well activate website tawakkalna	Positive	0	1	0
Google Play Store	4c4ed79b-2aee-4cc0-b970-25ab59acd8bf	The program was excellent, but after the update, it became very bad. It keeps asking for location confirmation, and even after confirming the location, I still face the same problem. It doesn't open on my Galaxy S8. I hope you find a solution as soon as possible. I don't have the patience to contact anyone. May Allah bless you all. 🌷	Mimi S	##########			6	ar	us		1	ar	program excellent update become bad keep ask location confirmation even confirm location still face problem doesnt open galaxy hope find solution soon possible dont patience contact anyone may allah bless	Negative	1	1	0
Google Play Store	532a76f4-fa8d-4683-9ee0-5c0acc327156	Very good	محمد حامد	##########			0	ar	us		3	ar	good	Positive	0	0	0
Google Play Store	d7d5d5cd-42fc-46a5-b732-43d92e57d9dd	I launched the bad application in bad.	علي حارثي	##########			0	ar	us		1	ar	launch bad application bad	Negative	1	0	0
Google Play Store	c7eebf34-d869-451b-afed-dabf1f8437db	The application does not open even though I have updated it to the latest version. The whole world now does all its banking operations through applications. The problem is that the application keeps crashing.	Al Shamrani	##########			0	ar	us		1	ar	application open even though update late version whole world bank operations applications problem application keep crash	Negative	0	1	1
Google Play Store	5fe8c37f-c9bd-4c3d-b3d7-0d219a534fac	After the update, it asks me to specify the location, knowing that I gave it permission and the location. I contacted the bank until Saturday but they did not provide me with a solution. I will withdraw all my balances from this very exhausting bank.	جاك العلِم	##########			0	ar	us		1	ar	update ask specify location know give permission location contact bank saturday provide solution withdraw balance exhaust bank	Negative	1	1	0
Google Play Store	33f41ef8-97f3-4787-ac4a-3eee88089410	Excellent	فهدمحمد اللغبي العبدلي	##########			0	ar	us		5	ar	excellent	Positive	0	0	0
Google Play Store	6484df1f-948b-43b0-9835-72f886101562	Thank youuuuuuu!	محمد رفاعي	##########			0	ar	us		5	ar	thank youuuuuuu	Positive	0	0	0
Google Play Store	aeef9256-226e-4630-8065-5d6b059484d2	"Very bad application, it always says the password is wrong multiple times, even after I change it, it doesn't open for me."	حسن صبحي جابر لاشين	##########			1	ar	us		1	ar	bad application always say password wrong multiple time even change doesnt open	Negative	1	1	0
Google Play Store	cb7e8bf9-6671-46ee-9cf3-72cbfd102a56	The application is less than bad, every now and then there is an update or activation of the website. We activate the website and it doesn't open. The application is problematic and needs activation. It is completely useless. If I travel abroad, I swear to God I will forget all the worries, especially the worries of my trip.	abumohmed 321 gmail K	##########			2	ar	us		1	ar	application less bad every update activation website activate website doesnt open application problematic need activation completely useless travel abroad swear god forget worry especially worry trip	Negative	1	1	0
Google Play Store	e9c16e72-14e5-4c2f-81b2-21d05b7a5739	Very, very good.	Bashir Azzam	##########			0	ar	us		5	ar	good	Positive	0	0	0
Google Play Store	7152d6fa-1d43-4894-b555-4b2654576137	Very bad	عجبتني عاجبتني	##########			0	ar	us		1	ar	bad	Negative	1	0	0
Google Play Store	c12afd87-6500-4545-a59f-9b946f89255b	I cannot retrieve the government amounts each time. He keeps saying it's an error or that he has delayed sending the code. Why is this happening? I have to make trips to the bank.	Sony Z	##########			0	ar	us		1	ar	retrieve government amount time keep say error delay send code happen make trip bank	Negative	0	0	1
Google Play Store	21331e2a-4c7a-4005-bf32-0189b913980f	The application is very bad after the update.	لاحول ولا قوة الا بالله استغفر الله	##########			0	ar	us		1	ar	application bad update	Negative	1	0	0
Google Play Store	58f33e88-2e23-403b-9606-1c71b1e360c6	Good.	احمد ال مفرح	##########			0	ar	us		4	ar	good	Positive	0	0	0
Google Play Store	ca821522-356a-412e-a401-a5101f148540	After the update, it won't open.	سليمان السيف	##########			0	ar	us		1	ar	update wont open	Negative	0	1	0
Google Play Store	397521b9-b4e9-4e74-a33d-8300664fb99f	The application Mashi Bikayfah refuses to open on my mobile every time. I should have another mobile to open it successfully every time as I wish. Also, if it's not connected to the charger, it refuses to open. What should I do in this situation?	منال الحربي	##########			0	ar	us		1	ar	application mashi bikayfah refuse open mobile every time another mobile open successfully every time wish also connect charger refuse open situation	Negative	0	1	0
Google Play Store	14afb70c-4ae5-4701-af36-ae377f359ea4	Very bad, the application does not work, it is the worst.	شموخ مسلمة	2023-03-09 09:54:00			0	ar	us		1	ar	bad application work bad	Negative	1	1	0
Google Play Store	cae4c2e0-ff4c-486c-8f96-4547ce999c32	Under experimentation, I hope it will be helpful.	مناع عسيري	2023-03-09 09:31:00			0	ar	us		5	ar	experimentation hope helpful	Positive	1	0	0
Google Play Store	fa89de8a-bee6-4286-badc-ee14bb3952e4	The application is very bad.	حسين سلمان	2023-03-09 06:06:00			0	ar	us		1	ar	application bad	Negative	1	0	0
Google Play Store	c2dd0d33-48dd-49b7-bd1a-ee857edc18c4	The program, after the latest update, asks for the activation of the geographic location. When activated, it asks again, and the program does not open at all. I called the bank and they informed me that there is a malfunction that will be resolved with the new update. They guided me to open the program through the Google page and enter the username and password for online personal services. Indee…	محمد السلطان	2023-03-09 05:22:00			0	ar	us		5	ar	program late update ask activation geographic location activate ask program open call bank inform malfunction resolve new update guide open program google page enter username password online personal service indeed able access account perform usual bank transactions write note inform everyone current malfunction fix thank	Neutral	0	1	0
Google Play Store	b1d17960-7316-407d-983c-cd8d2ca62764	The service is excellent and more than amazing.	علي عبده	2023-03-09 03:56:00			1	ar	us		5	ar	service excellent amaze	Positive	0	0	0
Google Play Store	13f3628f-0da8-40fb-8d85-29372a7a9aa3	Sorry, he is not willing to open it for me. I need the application urgently. He says there is an error in accessing the website.	نوره المهري	2023-03-09 01:46:00			0	ar	us		1	ar	sorry will open need application urgently say error access website	Negative	0	1	0
Google Play Store	0656f3f8-365e-41c6-b8bb-1560a4157fd6	Trash Bank and for sure Trash app.	سليمان عطوي	2023-03-09 00:02:00			0	ar	us		1	ar	trash bank sure trash app	Negative	1	0	0
Google Play Store	a03ab819-6ffb-4b74-959c-5ea491ac51e6	Yes	عبدالله عبدالله	##########			0	ar	us		5	ar	yes	Positive	0	0	0
Google Play Store	3dae11fc-4b5b-4972-8031-223ca25419ca	Facilitates all banking operations and bill payments.	Suraj Almrhoon	##########			1	ar	us		5	ar	facilitate bank operations bill payments	Neutral	0	1	0
Google Play Store	2cb0ccf6-760c-40ec-8308-2ff6fe3d2c33	Unfortunately, the application is extremely bad. It is necessary to create a new application that is easy, practical, and fast. The current one has no hope at all. It is still very bad.	Fahad Alhothel	##########	عميلنا العزيز، نأسف لسماع ذلك ونأمل منك تزويدنا بالملاحظة التي تواجهك عبر البريد الإلكتروني info@riyadbank.com أو يمكنك التواصل معنا على الرقم 8001242225 لنتمكن من خدمتك.	2023-02-09 03:30:00	13	ar	us		1	ar	unfortunately application extremely bad necessary create new application easy practical fast current one hope still bad	Negative	1	0	0
Google Play Store	e599053b-e456-4e32-bb38-0a7ef59f765e	I have an account at Bank Al Riyadh and after a while, my account disappeared from the application and it says there are no records to display, even though the account was active.	ابو محمد	##########			0	ar	us		1	ar	account bank al riyadh account disappear application say record display even though account active	Negative	0	1	0
Google Play Store	5b7ea12b-a065-4fcc-8d2e-faa806539ef5	It is bad after the update and cannot be used.	عبدالله محمد عبدالله	##########			0	ar	us		1	ar	bad update use	Negative	1	0	0
Google Play Store	0bc1fc2e-8ded-4a27-a09d-0d0ac8225538	After the latest update, the application does not open even with location activation.	علي هاشم	##########			2	ar	us		1	ar	late update application open even location activation	Negative	0	1	0
Google Play Store	f4a5a782-997e-4b27-aaaa-6ea89dfe6fcf	Unfortunately, the app sometimes refuses to access the website. Previously, before the latest update, it was excellent and now it is bad.	Nawaf Als	##########			3	ar	us		5	ar	unfortunately app sometimes refuse access website previously late update excellent bad	Negative	1	1	0
Google Play Store	86bf45e6-fed8-4f67-b76e-43cd1d499aa1	There is a problem with the new update, which is that the website, despite its low size, is not responsive.	علي الفركي	2023-03-08 07:48:00			0	ar	us		1	ar	problem new update website despite low size responsive	Negative	1	1	0
Google Play Store	db9fa34f-0358-4759-88e0-c39ebcd68aa5	Very bad.	محمود سامبوا	2023-03-08 06:22:00			0	ar	us		1	ar	bad	Negative	1	0	0
Google Play Store	4439ef01-6622-471d-8074-77bbc665f5cc	Problem: Huawei device is asking for location determination.	Jamelh Alammar	##########			0	ar	us		5	ar	problem huawei device ask location determination	Negative	0	1	0
Google Play Store	011020c8-21d2-47e1-b03b-e856f4db2285	The application, every time I open it, asks me for my location and I give it, but it does not open. It is forbidden, you have disrupted my transactions and no one has solved the problem for me. I contacted you and called, but it was no use. Every time I try to enter the application, it asks for my location and I give it, then it rejects it. In the end, with you, may God take care of you and be th…	محمد الجهني	##########			1	ar	us		1	ar	application every time open ask location give open forbid disrupt transactions one solve problem contact call use every time try enter application ask location give reject end may god take care best representative disrupt affairs	Negative	1	1	0
Google Play Store	521a35fc-fbcc-48ad-9166-ce26d4ce5a59	Good.	ابراهيم العنزي	##########			0	ar	us		5	ar	good	Positive	0	0	0
Google Play Store	41521d4c-88c1-4a52-986d-e24c3c032518	A very, very bad application that requests an update and does not accept more than 10 attempts. It continuously fails to install. The worst application I have ever come across. I hope to revert to the previous application.	حسن السعيدي	##########			0	ar	us		1	ar	bad application request update accept attempt continuously fail install bad application ever come across hope revert previous application	Negative	1	1	0
Google Play Store	8b1fd689-d186-4aa9-9efe-3fd64355f984	The update is bad.	HuSsAiN AlGhAdEeR	##########			0	ar	us		1	ar	update bad	Negative	1	0	0
Google Play Store	3db04dbd-30f0-46eb-a3de-462bc5816a6b	The application, after updating, is very bad. It asks for location permission and although permission is granted, the app fails to open. It repeatedly requests for the location in an annoying manner even after granting permission, and the app does not respond.	الذيب سرحان	##########			1	ar	us		1	ar	application update bad ask location permission although permission grant app fail open repeatedly request location annoy manner even grant permission app respond	Negative	1	1	0
Google Play Store	65fbb4e0-84ca-420b-9d09-7451d20477f4	After contacting the bank regarding the login issue (website error), the solution is to go to settings and grant all permissions to the application, then restart the device and it should work fine, just like it did for me. Thank you, Riyadh Bank ❤️	احمد الهلال	##########			4	ar	us		5	ar	contact bank regard login issue website error solution go settings grant permissions application restart device work fine like thank riyadh bank	Positive	0	1	0
Google Play Store	a0b37f5c-44a2-4f0c-9729-00e478bbaeaf	Excellent	اذكر الله	2023-03-07 09:45:00			0	ar	us		5	ar	excellent	Positive	0	0	0
Google Play Store	08945a19-1110-4d17-9851-a11e02a11dda	Very good application.	عبدالله الشمراني	2023-03-07 06:19:00			0	ar	us		3	ar	good application	Positive	0	0	0
Google Play Store	5d0194aa-a83f-48f9-a845-3ac15f5875ba	The application is bad, it does not accept login and an error message appears saying "allow access to location" despite activating the location.	KHALED ALNAGGAR	2023-03-07 04:01:00			19	ar	us		5	ar	application bad accept login error message appear say allow access location despite activate location	Negative	1	1	0
Google Play Store	674ae9c8-6990-4ecc-ba48-311895ddd65e	Very very bad and boring and exhausting, it keeps lagging every moment.	أميرة الفولاذ	2023-03-07 01:10:00			0	ar	us		2	ar	bad bore exhaust keep lag every moment	Negative	1	0	0
Google Play Store	67966cd7-6514-47f7-8fdc-7d887dd761a4	The application is very bad after the latest update, and I can't access it even after enabling the location. Please solve this problem so that we can benefit from electronic banking services.	Mr Os	2023-03-07 00:35:00			0	ar	us		1	ar	application bad late update cant access even enable location please solve problem benefit electronic bank service	Negative	1	1	0
Google Play Store	a1c718d2-b806-417a-a0d2-0e8a3877e34b	What's happening with the application? It doesn't open and asks for location verification, even though the settings are correct. Unfortunately, no one is responding to our complaints, and the bank keeps saying they are sorry without offering any solution to the problem. We have also messaged you on Twitter and received the same response. We need an urgent solution.	سعد الفوزان	##########			0	ar	us		1	ar	whats happen application doesnt open ask location verification even though settings correct unfortunately one respond complaints bank keep say sorry without offer solution problem also message twitter receive response need urgent solution	Negative	0	1	0
Google Play Store	473bf933-41c5-47d0-9c8d-8e8b33cf770a	Beautiful	صالح الزهراني	##########			0	ar	us		3	ar	beautiful	Positive	0	0	0
Google Play Store	28f9a29f-aa72-4e6a-a061-ec70f8391497	The application is not working after the latest update.	ابو محمد	##########			1	ar	us		1	ar	application work late update	Negative	0	1	0
Google Play Store	ea0a0bef-601f-42dd-b4cd-9f72e170ab8a	The application after the update is slow.	البصمة الجميلة تبقى وإن غاب صاحبها	##########			0	ar	us		2	ar	application update slow	Negative	0	0	1
Google Play Store	a6e982f0-72f8-43d1-9c91-dfd305acbb02	Very bad application... I can't log into my account, it keeps asking for permission to share my location every time. I'm tired of trying to open it, but it's not working.	Akram AL Hajji	##########			0	ar	us		1	ar	bad application cant log account keep ask permission share location every time im tire try open work	Negative	1	1	0
Google Play Store	479e73cc-01cf-4631-bff1-838bb1b8188e	The latest update requires website activation, so we activated it, but it was of no use as it still does not open my account. They should have reverted to the previous update when everything was working fine!	Abdulelah S	##########	عميلنا العزيز، يؤسفنا سماع ذلك ونأمل منك مشاركتنا ملاحظتك عبر البريد الالكتروني info@riyadbank.com و سيتم النظر في الملاحظة بعين الاعتبار.	##########	0	ar	us		2	ar	late update require website activation activate use still open account revert previous update everything work fine	Negative	0	1	0
Google Play Store	b2dc7e3c-2c62-485f-8e79-2f8a159b54ff	The application is not working.	راكان العجمي	##########			0	ar	us		5	ar	application work	Negative	0	1	0
Google Play Store	bb51ca42-3128-48cd-b72d-8bd944491343	Many problems arise when trying to access this new application; the previous one was much better.	waleed alsulamianey	2023-03-06 09:26:00			0	ar	us		1	ar	many problems arise try access new application previous one much good	Negative	1	1	0
Google Play Store	0509ddb8-8f42-4048-8cf0-df50a6d11e79	The application is not working.	عابد الحربي	2023-03-06 09:01:00			0	ar	us		1	ar	application work	Negative	0	1	0
Google Play Store	3cb255e0-e6fb-4386-a36e-cc694b4ffaac	Very bad application. The new update does not work even though the website is accessible. Please solve the problem.	A A	2023-03-06 06:54:00			2	ar	us		1	ar	bad application new update work even though website accessible please solve problem	Negative	1	1	0
Google Play Store	7a908c20-8386-4be5-a8b2-41e3c7480a32	The application is not working after the latest update, even with all the permissions activated. I was forced to use the website.	ABDULLAH ALQAFFAS	2023-03-06 04:42:00			1	ar	us		1	ar	application work late update even permissions activate force use website	Negative	0	1	0
Google Play Store	b264bf6f-184c-450d-83ef-77fdb5f003c0	Thank you very much.	موسئ الزهراني	2023-03-06 03:56:00			0	ar	us		4	ar	thank much	Positive	0	0	0
Google Play Store	88bb0597-a445-43b5-8f3a-5e1565a1c087	Every time it asks to specify the location, even though the location is already enabled. And also, after enabling it, it still doesn't work. Please work on solving this problem.	ال ال	##########			13	ar	us		1	ar	every time ask specify location even though location already enable also enable still doesnt work please work solve problem	Negative	0	1	0
Google Play Store	1d5c9c2c-e9f8-440f-87c9-5bcd199cb189	Authentic in the days of juices.	ابو عبدالله	##########			0	ar	us		4	ar	authentic days juices	Neutral	1	0	0
Google Play Store	8f433d64-e59e-40b0-8014-8318d5d0cdee	It has become very bad. For two days, the application doesn't open. Please solve the problem. It sends a message saying there is an error with the location??? And after I sent a complaint through email and it was supposed to be resolved, but there is no response. One star added to it.	Ibrahim Saifo	##########			291	ar	us		1	ar	become bad two days application doesnt open please solve problem send message say error location send complaint email suppose resolve response one star add	Negative	1	1	0
Google Play Store	a29d411f-1e2e-4f87-a016-7c039d004825	The program is good and easy to use, but it needs more development from the program administrators. Thank you.	فراج البتال	##########			8	ar	us		4	ar	program good easy use need development program administrators thank	Positive	0	0	0
Google Play Store	4e0d584a-1313-4cb0-a33d-6e5f4a6d68cf	There is no feature to remind me of what it saves and does not open with fingerprint. Please make the necessary changes. Thank you.	Apk Kpa	##########			0	ar	us		3	ar	feature remind save open fingerprint please make necessary change thank	Negative	0	1	0
Google Play Store	0aeff36d-aa78-47c0-a83c-788719a07537	Very bad update unable to access the application redirects to the website and does not work.	يوسف موسي	##########			2	ar	us		1	ar	bad update unable access application redirect website work	Negative	1	1	0
Google Play Store	33387bfc-79cb-47bf-9386-70de00f676df	After the latest update, it does not open.	Saud G	##########			0	ar	us		1	ar	late update open	Negative	0	1	0
Google Play Store	6cf55c24-bc40-4327-937a-921d147fbf28	Every time I try to log in, it requests site activation, and when I activate it, I still can't log in. Why? I've tried without success. I hope the responsible people look into it so that we can use it like before. I'm deleting the program, it's a the worst, and the idea is very flawed and a the worst.	،،ム乃ÐЦレレムん	##########			8	ar	us		1	ar	every time try log request site activation activate still cant log ive try without success hope responsible people look use like im delete program bad idea flaw bad	Negative	1	1	0
Google Play Store	be208ff1-928e-4152-b590-510f3e6cd82f	It is time to leave for another bank to repeat the bad application experience every time a new update appears... It is not possible to access the website with the excuse of allowing access. 👎👎👎👎👎👎👎👎👎👎	خالد الحربي	##########			2	ar	us		1	ar	time leave another bank repeat bad application experience every time new update appear possible access website excuse allow access	Negative	1	1	0
Google Play Store	fa99f505-a83c-4a59-8023-1bdc39b46b93	Good.	عبد الفتاح القحيف	##########			0	ar	us		4	ar	good	Positive	0	0	0
Google Play Store	1b68403a-5404-4df8-b435-5c35b2980f73	Beautiful	فريدة هاشم	##########			0	ar	us		3	ar	beautiful	Positive	0	0	0
Google Play Store	b0f3353d-7e8b-47d2-b90b-30cb8106b895	Excellent experience	بسام محمد العويضه	##########			0	ar	us		5	ar	excellent experience	Positive	0	0	0
[truncated: 4,027 more rows]
