# Supplementary material for: Retrieval-augmented generation analysis of user reviews in Saudi mobile banking apps: a comparative user experience study of iOS and Android
Source: PeerJ journal article supplement (doi:10.7717/peerj-cs.3565), 2026-02-06
Supplement: Android.zip [file sabb_final.xlsx]

## Sheet: Sheet 1 - sabb_final
sabb_final
source	review_id	review_description	user_name	review_date	developer_response	developer_response_date	thumbs_up	language_code	country_code	app_version	rating	en	cleaned_reviews	Sentiment	source_y	Satisfaction	Effectiveness	Efficiency
Google Play Store	0eb1574e-ac9c-4422-8fc0-1f474adf4606	The application is now better than before, despite the presence of some minor observations.	Mustafa Al-Awami	##########			1	en	us		4	ar	application good despite presence minor observations	Positive	Google Play Store	1	0	0
Google Play Store	ffbca28c-07dc-44f2-87eb-07085e9e6284	Very good	Hassan Ghadban	##########			0	en	us		5	ar	good	Positive	Google Play Store	0	0	0
Google Play Store	2f4bb2c0-9051-4013-b1b3-2dfcfc29d91c	Excellent application.	Khalid Moslem	##########			0	en	us		5	ar	excellent application	Positive	Google Play Store	0	0	0
Google Play Store	1a622d16-cce3-4de6-9660-3c134b965116	The latest update is very bad. The operations cannot be completed on the first try. The app sometimes exits without reason. Sometimes, some icons disappear for no reason, and other times the information disappears. The app takes a long time to load data, which makes the user think that the app has crashed or something similar.	Eyad Alhaj Mohammed	##########			0	en	us		2	ar	late update bad operations complete first try app sometimes exit without reason sometimes icons disappear reason time information disappear app take long time load data make user think app crash something similar	Negative	Google Play Store	1	1	0
Google Play Store	1215a185-c2a2-4a21-a535-de15ca6790e6	The bank and its application have been in continuous decline for years. I have been a premier customer for 20 years and have started transferring my accounts to another bank.	a	##########			0	en	us		1	ar	bank application continuous decline years premier customer years start transfer account another bank	Negative	Google Play Store	1	0	0
Google Play Store	4ef91244-4a37-4bdc-956e-62f0fe67aba1	The most difficult banking application I have dealt with .. Unable to access my account.	ahmed zahra	##########			0	en	us		1	ar	difficult bank application deal unable access account	Negative	Google Play Store	1	1	0
Google Play Store	b1662163-e990-4427-8885-429d4d659459	Unfortunately, the application freezes a lot and needs many repairs.	Dr. Jaboo	##########			0	en	us		2	ar	unfortunately application freeze lot need many repair	Negative	Google Play Store	1	0	1
Google Play Store	506ca832-f693-4ae6-904d-71625aad3002	One of the best applications on mobile compared to others from banks, but I hope they add support for Samsung Dex.	Ali Atta	##########			0	en	us		5	ar	one best applications mobile compare others bank hope add support samsung dex	Positive	Google Play Store	0	0	0
Google Play Store	28111220-a450-47cd-82e1-6148faffb98c	Bad application, it does not open and does not send messages when opened.	A	##########			0	en	us		1	ar	bad application open send message open	Negative	Google Play Store	1	1	0
Google Play Store	2df71a15-4130-4603-a32a-8688828023f8	The application has become bad and slow.	Ab Ha	##########			0	en	us		2	ar	application become bad slow	Negative	Google Play Store	1	0	1
Google Play Store	7b019ce2-0c9e-4396-9d15-bd7855b09f3f	The application is very bad. I wish there was a rating lower than one star because one star is way too many.	Nour Al-Rasheed	##########			24	en	us		1	ar	application bad wish rat low one star one star way many	Negative	Google Play Store	1	0	0
Google Play Store	d0b8c9d2-306b-468f-8d9e-30998e3b54c8	My previous rating was 5 stars for SABB days. However, after the merger of SABB and Alawwal, the application has become extremely bad. It may be easier to use, but it is slow and frequently freezes. I have to repeat operations 2 or 3 times to get them to work properly. They need to update the app and fix the technical issues. I have started to hate using the app because of its numerous problems.	Sami Abdelhadi	##########			0	en	us		1	ar	previous rat star sabb days however merger sabb alawwal application become extremely bad may easy use slow frequently freeze repeat operations time get work properly need update app fix technical issue start hate use app numerous problems	Negative	Google Play Store	1	1	0
Google Play Store	2b5e16be-348b-4c6f-96bd-49fc41553ad1	One of the easiest banking programs, extremely excellent.	Manal Lubbad	##########			0	en	us		5	ar	one easy bank program extremely excellent	Positive	Google Play Store	0	0	0
Google Play Store	3c1197ef-8f6d-4ec1-a92a-625f5ba45ca8	Excellent application and we aspire for further development.	jamal omar	##########			0	en	us		5	ar	excellent application aspire development	Positive	Google Play Store	0	0	0
Google Play Store	9860d0c3-eba8-4a1d-9329-4caaebb43ce8	The application is very bad in terms of executing all financial transactions. After executing three operations, the application becomes very slow and unresponsive. Then it freezes completely and exits. It is necessary to wait for more than an hour to log in again. I hope the bank will review and solve the problems of the application.	Abdullah I.J	##########			0	en	us		1	ar	application bad term execute financial transactions execute three operations application become slow unresponsive freeze completely exit necessary wait hour log hope bank review solve problems application	Negative	Google Play Store	1	1	1
Google Play Store	3dd20218-80ea-4c22-8533-4aec82223355	The problem, please check the network, keeps recurring even though the network is available.	Knight	##########			1	en	us		3	ar	problem please check network keep recur even though network available	Negative	Google Play Store	0	1	0
Google Play Store	03325449-b7fc-461c-8a1a-ea3a3f68ce48	"The first one failed, they all turned their back on us."	Sam Lee	##########			1	en	us		1	ar	first one fail turn back us	Negative	Google Play Store	1	1	0
Google Play Store	0733fcd1-7dd2-46fe-9995-9d0acc908cd9	The application is working well now 👍🏼	Ahmad Albairouty	##########			2	en	us		5	ar	application work well	Positive	Google Play Store	0	1	0
Google Play Store	da3f2f65-2f51-4d40-8cd7-f7dc2042922d	Bad in the login process.	Abdullah250	##########			0	en	us		1	ar	bad login process	Negative	Google Play Store	1	1	0
Google Play Store	d9a1f715-ea3c-4dfb-8c9d-3bd2d48f2857	Miles of the knights no longer appear in the application after today's update.	Mazen K.	##########			0	en	us		1	ar	miles knight long appear application todays update	Neutral	Google Play Store	0	1	0
Google Play Store	b87f9744-1d6a-4c66-bba6-bcc5e716471d	It crashes a lot and the program interface is very difficult.	Hatem zrek	2023-06-02 01:29:00			1	en	us		1	ar	crash lot program interface difficult	Negative	Google Play Store	1	1	0
Google Play Store	d79a72aa-6326-42ea-9e6b-6f1f7cc21fdf	The application is excellent but it needs development in bill payment and increasing response speed upon login.	INFINITY A	##########			0	en	us		4	ar	application excellent need development bill payment increase response speed upon login	Positive	Google Play Store	1	1	0
Google Play Store	d4e08451-d5ab-4ecd-89ce-105a333e428b	A very unsuccessful application. The username has been banned without any reason, and when attempting to remove the ban, a technical error occurs. Even the customer service phone has the same problem.	kamal mohamed	2023-06-01 08:15:00			0	en	us		1	ar	unsuccessful application username ban without reason attempt remove ban technical error occur even customer service phone problem	Negative	Google Play Store	1	1	0
Google Play Store	afd02ac2-dd75-4114-a882-e78c7c2265d4	If you sneeze while you have the application open, you must log in again.	Bander G	##########			0	en	us		1	ar	sneeze application open must log	Neutral	Google Play Store	0	1	0
Google Play Store	063d596b-ab89-424d-b7a7-287ca8d391ea	Finally, the login problem has been resolved. We have logged in twice and so far, things are good. We have adjusted the rating, they deserve it.	Majid Faqeeh	##########			1	en	us		4	ar	finally login problem resolve log twice far things good adjust rat deserve	Positive	Google Play Store	0	1	0
Google Play Store	2148fe36-8035-4301-9368-0123210d07e1	The worst application ever, congratulations.	H722	##########			0	en	us		1	ar	bad application ever congratulations	Negative	Google Play Store	1	0	0
Google Play Store	a75e9023-ca1b-4efd-ace7-39a2e9707486	Bad application, it doesn't open!! After the update.	Asmd Aldawsari	##########			0	en	us		1	ar	bad application doesnt open update	Negative	Google Play Store	1	1	0
Google Play Store	16f5c99e-1fe9-4ba8-b784-4dad7a9d5b8d	After the latest update, it has become slow and hangs.	hussain7622	##########			0	en	us		1	ar	late update become slow hang	Negative	Google Play Store	1	0	1
Google Play Store	c5137944-e53c-4407-92ef-fdefe04ceed8	the worst application on Android devices, I have to log in twice for it to accept.	Mohd Bukhary	##########			0	en	us		1	ar	bad application android devices log twice accept	Negative	Google Play Store	1	1	0
Google Play Store	69e4cdf4-63f1-4d5a-9822-e3ae40399138	The update is very bad. You have to log in twice, and after several operations, it starts to freeze and becomes slow.	Megbil Alzahrani	##########			0	en	us		1	ar	update bad log twice several operations start freeze become slow	Negative	Google Play Store	1	0	1
Google Play Store	6fd92c4b-4224-4dc6-a3db-dacd6f413be9	The application no longer opens at all after joining the first bank.	Salem Salem	##########			0	en	us		1	ar	application long open join first bank	Neutral	Google Play Store	0	1	0
Google Play Store	3e8cc438-3efb-4dfe-92eb-e8b68625c8e2	The recent update is very problematic. When trying to enter and enter the OTP, the application crashes and exits, especially the Arabic language application.	Ahmed Alhumoud	2023-05-08 05:29:00			0	en	us		1	ar	recent update problematic try enter enter otp application crash exit especially arabic language application	Negative	Google Play Store	1	1	0
Google Play Store	87734984-6377-4d8f-944b-96b6a8655435	Since the last update, the application always hangs and does not enter easily.	mahmoud madkour	##########			0	en	us		2	ar	since last update application always hang enter easily	Negative	Google Play Store	0	1	1
Google Play Store	1fb366b8-961d-43e4-896c-18997d392248	There is a problem in the application every time after entering the OTP for the first time, it takes me back to the first page and we start entering the login information again. Please solve the problem, Android device.	Nayef AlBassam	2023-05-04 05:10:00			2	en	us		1	ar	problem application every time enter otp first time take back first page start enter login information please solve problem android device	Negative	Google Play Store	0	1	0
Google Play Store	0b2c2c14-5093-4f58-ad65-85ce86472319	the worstand backward application! Full of mistakes and problems! I log in and the home page loads, then it logs me out! I have to log in again in order to use it!	Jamal Gonzalez	##########			0	en	us		1	ar	worstand backward application full mistake problems log home page load log log order use	Negative	Google Play Store	1	1	0
Google Play Store	39264910-f820-4668-bce0-7568af076032	After the latest update, whenever I enter the application, it logs me out and I have to log in twice to access the application. It's annoying.	ESSAM A.	##########			0	en	us		2	ar	late update whenever enter application log log twice access application annoy	Negative	Google Play Store	1	1	0
Google Play Store	c058a952-72f5-4100-aef8-6374046a07cd	The application no longer works on android devices.	MOHD	2023-05-01 06:21:00			0	en	us		1	ar	application long work android devices	Negative	Google Play Store	0	1	0
Google Play Store	863fd213-dcce-4e99-b6bd-8faf1e7b71d2	The latest update is very bad. Every time I log in, it closes by itself and I have to log in again. I have to log in twice every time for it to work. It always gives a network problem even though there is no problem with the internet and all other programs are working fine!	ruaa	##########			0	en	us		3	ar	late update bad every time log close log log twice every time work always give network problem even though problem internet program work fine	Negative	Google Play Store	1	1	0
Google Play Store	d80a4918-a7cc-4661-a1d9-593d9285d71f	The application logs me out after logging in. Please solve this problem.	abdulmajid almulhim	##########			0	en	us		3	ar	application log log please solve problem	Negative	Google Play Store	0	1	0
Google Play Store	1ee8e55c-81ba-419a-aaa1-e9b2287d6395	The problem with the application is that if your device language is set to English and the application is in Arabic, it opens for a few seconds and then prompts you to sign in again. However, if both the device language and the application are set to Arabic, there is no problem. I hope the problem can be resolved.	Khalid 3li	##########			1	en	us		1	ar	problem application device language set english application arabic open second prompt sign however device language application set arabic problem hope problem resolve	Negative	Google Play Store	0	1	0
Google Play Store	8bcca0ba-586b-4834-ad5d-f0965dec45a4	The application restarts itself unexpectedly multiple times, and this bug has been occurring for a while without being fixed.	Zaki	##########			0	en	us		1	ar	application restart unexpectedly multiple time bug occur without fix	Negative	Google Play Store	0	1	0
Google Play Store	09ebcd43-16e4-4022-a6e4-bb4e6f288e69	The application automatically logs out after the first login and it is necessary to log in again.	Abdallah Mohamed	##########			0	en	us		3	ar	application automatically log first login necessary log	Neutral	Google Play Store	0	1	0
Google Play Store	76e0837c-3524-4ab7-be6f-785073bb2959	The latest update, the application freezes and closes on its own.	AHMED BA-ATA	##########			0	en	us		1	ar	late update application freeze close	Negative	Google Play Store	0	0	1
Google Play Store	bb91e23c-200d-4610-b6cb-237e3e81510d	Unfortunately, in the latest version v-7.0.3 on Android, once I log in, the program exits and closes. I have to log in again, and this is considered a critical vulnerability that must be addressed.	Ahmed Alsamahi	##########			0	en	us		1	ar	unfortunately late version v android log program exit close log consider critical vulnerability must address	Negative	Google Play Store	0	1	0
Google Play Store	b0f617d3-91d9-434c-9415-1404be980997	the worst application that goes from failure to failure! The application constantly crashes, and every time you log in, it takes you back to the login screen and asks for the code again. I hope you find a solution to these basic problems and stop focusing on changing your identity without solving customer issues! 500 updates and the problems continue as they are.	Hani Al-Hazmi	##########			1	en	us		1	ar	bad application go failure failure application constantly crash every time log take back login screen ask code hope find solution basic problems stop focus change identity without solve customer issue update problems continue	Negative	Google Play Store	1	1	1
Google Play Store	2d084e87-5922-4c7b-bd35-b5511eccf8b2	I wish they would fix the login glitch. Every time I have to enter my information and code at least twice to log in.	Lama	##########			0	en	us		2	ar	wish would fix login glitch every time enter information code least twice log	Negative	Google Play Store	0	1	0
Google Play Store	51ac5361-2511-4bc6-87bb-14db57af5d4e	The application has been asking for the password twice recently. I don't know why this delay occurs. I enter the password and then the number that reaches your mobile phone, and then it asks for the password again and re-sends four digits. Is there a solution to this nonsense?	Ghayda Mazhar	##########			0	en	us		1	ar	application ask password twice recently dont know delay occur enter password number reach mobile phone ask password resends four digits solution nonsense	Negative	Google Play Store	0	0	1
Google Play Store	e2f46723-3e7c-4985-abf5-462384a3e739	There is a problem with the application after the update. I have to login twice in order to be able to log in.	Hussam Ajamieh	##########			2	en	us		2	ar	problem application update login twice order able log	Negative	Google Play Store	0	1	0
Google Play Store	3310ffe0-4e8d-4390-b41a-3ddb3e81aa50	After the recent update, a problem appeared when logging in. It automatically logs me out, which forces me to re-login again. Please address this issue as soon as possible.	AbdulRahman (Abu Dawood)	##########			4	en	us		1	ar	recent update problem appear log automatically log force relogin please address issue soon possible	Negative	Google Play Store	0	1	0
Google Play Store	be7b01fd-8dad-41e7-8f0c-f24341116c93	The new application will be very, very, very exciting.	amine taoufik	##########			3	en	us		1	ar	new application excite	Positive	Google Play Store	1	0	0
Google Play Store	4c71e56f-4a59-4050-bc4d-3b75a104fd72	Problem with login, I have to enter twice.	Osama Al Ghamdi - أسامة الغامدي	##########			5	en	us		1	ar	problem login enter twice	Negative	Google Play Store	0	1	0
Google Play Store	011628aa-7aac-4537-a99f-ebaf72639cb4	The latest update is very, very bad. Every time you try to log in, it crashes, and you have to try multiple times in order to log in.	Lucci Wawa	##########			3	en	us		1	ar	late update bad every time try log crash try multiple time order log	Negative	Google Play Store	1	1	0
Google Play Store	d31c4c9f-c8f1-4cfa-b45e-01bdb77ef15d	The latest update requires double login, which is very inconvenient, and there is no response from the developer. The technical support does not respond as if they do not see the comments.	mohamed hamad	##########			2	en	us		1	ar	late update require double login inconvenient response developer technical support respond see comment	Negative	Google Play Store	0	1	0
Google Play Store	58d4cc46-7a0e-418e-b6db-5417895038a2	After updating the application, it started asking us to log in twice all the time. Why????	Hussain Alqwaidhi	##########			3	en	us		1	ar	update application start ask us log twice time	Negative	Google Play Store	0	1	0
Google Play Store	14b6fb13-b59b-4dd7-97c0-c8400952afbf	The application does not work on the Android system since the last update. After login, it directly exits the page. Please restart it.	Ashraf Zaben	##########			0	en	us		1	ar	application work android system since last update login directly exit page please restart	Negative	Google Play Store	0	1	0
Google Play Store	6cee4f3e-66e7-4ea4-834f-37728c1c3a88	The application is not working.	Abdullah Turkistani	##########			0	en	us		1	ar	application work	Negative	Google Play Store	0	1	0
Google Play Store	b0174fd6-a274-4bdd-ad46-b4a677a0f89f	The latest update always has issues with login and it freezes.	Qusai Ali	##########			1	en	us		1	ar	late update always issue login freeze	Negative	Google Play Store	0	1	1
Google Play Store	9af41f92-2f74-4f8a-85fb-db660ecd5dd8	The program does not allow entry in Arabic. You must try twice.	A Google user	##########			0	en	us		3	ar	program allow entry arabic must try twice	Negative	Google Play Store	0	1	0
Google Play Store	ab9d3443-2284-44dc-8eda-7edf263e825a	The program disconnects and you have to log in again, sometimes even three times.	ABUBAKR	##########			0	en	us		1	ar	program disconnect log sometimes even three time	Negative	Google Play Store	0	1	0
Google Play Store	7c1889cb-3e73-4b8f-bf26-41f92f87e83f	The worst banking application ever.	Ibraheem Moafa	##########			0	en	us		1	ar	bad bank application ever	Negative	Google Play Store	1	0	0
Google Play Store	ae8c0738-8a5f-4783-8cb2-5fd0a9b9583c	The latest update is freezing and requesting registration twice.	Ahmad Abu Yunis	##########			0	en	us		3	ar	late update freeze request registration twice	Negative	Google Play Store	0	1	1
Google Play Store	9f54f88b-086e-48c2-ab2f-f3231ea87bc5	The version that was released this week on April is absolutely not acceptable and very very annoying.	Ibrahim Abdullah	##########			0	en	us		1	ar	version release week april absolutely acceptable annoy	Negative	Google Play Store	1	0	0
Google Play Store	97151fcb-ae96-4d6e-a933-17a318bf151d	After the latest update, the login process has become repetitive twice due to changing the system from one bank to another. It's something that annoys you when you enter the application.	Hatem Al-Haidan	##########			1	en	us		1	ar	late update login process become repetitive twice due change system one bank another something annoy enter application	Negative	Google Play Store	1	0	1
Google Play Store	5db5fbab-4810-4d61-807e-41e6e45fbc59	1 star for the latest update useless app now. OS - Android 13 The app has not been working properly for months now, and after the latest update, it doesn't work at all.	Mohamed Istanbuly	##########			0	en	us		1	ar	star late update useless app os android app work properly months late update doesnt work	Negative	Google Play Store	0	1	0
Google Play Store	8c019f8d-1f2d-4b3b-add0-4eeaa38a0f16	After the new update of the application, I was unable to log in. Every time I tried to enter, it kicks me out.	Ammar	##########			1	en	us		1	ar	new update application unable log every time try enter kick	Negative	Google Play Store	0	1	0
Google Play Store	40c4d72a-68c8-44c8-a8c8-ad8577f09a27	Every time I enter the homepage, it redirects me to the login page again.	mohamed mekawy	##########			1	en	us		1	ar	every time enter homepage redirect login page	Neutral	Google Play Store	0	1	0
Google Play Store	3d8efb14-e40d-47b3-a632-2f8358d761e4	Please, after the new update, the problem with the new identification for the bank is that when logging into the application, it does not complete the login. It requires changing the language to English and then changing it back to Arabic again in order to be able to log in and prevent the application from logging out.	Mostafa Mansour	##########			2	en	us		1	ar	please new update problem new identification bank log application complete login require change language english change back arabic order able log prevent application log	Negative	Google Play Store	0	1	0
Google Play Store	568d5f2f-993b-43ff-ad70-78c7883bdced	Most banks do not require authentication through access.	Faisal Alnasser	##########			0	en	us		1	ar	bank require authentication access	Neutral	Google Play Store	1	0	0
Google Play Store	fd77aa33-bb19-41a9-8b3a-465869e5505d	"Do not accept money transfers."	nora alrashidan	##########			0	en	us		1	ar	accept money transfer	Negative	Google Play Store	0	1	0
Google Play Store	24e4da33-3ff8-48c9-b695-087cd631782d	Very bad service is provided. Every month the account is blocked for any given reason by the time of salary. After searching in any branch, one encounters a lot of bad behavior.	Harshad Ameen	##########			3	en	us		1	ar	bad service provide every month account block give reason time salary search branch one encounter lot bad behavior	Negative	Google Play Store	1	0	0
Google Play Store	e819271e-ad33-4fb9-831e-3704dcac8e61	The device claims to have Root access, but in reality, it does not. All other banking applications work except for this one.	بقعه	##########			0	en	us		1	ar	device claim root access reality bank applications work except one	Neutral	Google Play Store	0	1	0
Google Play Store	7de57b96-8ed7-4f6e-af54-302566b4c8ea	The application needs an update.. As some decimal numbers do not appear on the cards. Secondly, the response between menus is slow and uneven. The image has lag and is not smooth in usage, unlike the application version on the iPhone.	AbdulHakim AbdulAziz Bakhsh	##########			0	en	us		3	ar	application need update decimal number appear card secondly response menus slow uneven image lag smooth usage unlike application version iphone	Negative	Google Play Store	1	0	1
Google Play Store	0ac3435a-d4f5-4cc8-80a6-d49e03d90596	An application that is useless, with lagging in navigation and neglect in development and problem-solving. They only focus on other systems.	ALi Allawi	##########			0	en	us		1	ar	application useless lag navigation neglect development problemsolving focus systems	Negative	Google Play Store	1	0	1
Google Play Store	9fbf6925-0ffc-4aba-ba54-05f6eb92385a	A very bad application that does not live up to being a banking application. As soon as you log in, the application shuts down.	Eng Ahmad	##########			0	en	us		1	ar	bad application live bank application soon log application shut	Negative	Google Play Store	1	1	0
Google Play Store	3041ceee-ec6e-470b-9cc7-ef523c90d26a	The application has improved significantly.	Ahmed Ramadan	2023-03-06 06:06:00			0	en	us		4	ar	application improve significantly	Positive	Google Play Store	1	0	0
Google Play Store	722a39b5-00db-43a6-8185-81cd60b52d8c	It doesn't work !!!!!	MONZER HASSAN	##########			0	en	us		1	ar	doesnt work	Negative	Google Play Store	0	1	0
Google Play Store	48fd14a1-a4d7-4d5b-844b-3eb5b33afd6e	After the latest update, the recipients list does not appear for me to send a transfer through the application, so I have to use the laptop to send the transfers.	Dr. Mohammed Ameen	2023-03-01 06:24:00			0	en	us		1	ar	late update recipients list appear send transfer application use laptop send transfer	Negative	Google Play Store	0	1	0
Google Play Store	48c5ef9b-1dbb-4437-afc8-1d1ee90f9f55	The application does not work after the latest update, it closes immediately after logging in.	tamer mustafa	##########			0	en	us		1	ar	application work late update close immediately log	Negative	Google Play Store	0	1	0
Google Play Store	1018dc90-db6f-482e-87c6-cdb304d236b8	The latest update is not working properly at all.	mohamed elazab	##########			0	en	us		1	ar	late update work properly	Negative	Google Play Store	0	1	0
Google Play Store	d7da1165-c7f8-40a6-9f76-ef869547461c	The application is not functioning.	Hani Alkhayyat	##########			0	en	us		5	ar	application function	Negative	Google Play Store	0	1	0
Google Play Store	2f0b09f0-5f85-46d0-b88b-bfd1889684b5	The application is not working after the new update. It opens the page for 5 seconds and then the application closes automatically.	Shaban Elnajjar	##########			0	en	us		1	ar	application work new update open page second application close automatically	Negative	Google Play Store	0	1	0
Google Play Store	f231da4b-4f65-411f-9591-627d654181d2	The application is not working, please fix the problem as soon as possible.	Hajelzain Ahmed	##########			0	en	us		1	ar	application work please fix problem soon possible	Negative	Google Play Store	0	1	0
Google Play Store	63afd478-757c-415c-b160-d171870999a6	It is not working... and it takes a long time to fix it, and your interests are interrupted.	Yazan Alassaf	##########			0	en	us		1	ar	work take long time fix interest interrupt	Negative	Google Play Store	0	0	1
Google Play Store	be67a822-0a1d-4826-8f37-45ece0155b86	Very bad, it doesn't work.	bandr 55	##########			0	en	us		1	ar	bad doesnt work	Negative	Google Play Store	1	1	0
Google Play Store	2f60bbcd-40ec-47b4-b096-a774adc48dc3	There is an issue with the "Agie" login application. It says I need to verify the device and they will contact me for approval. After pressing 1, the application freezes. Please be aware and resolve it now.	F Hb23	##########			0	en	us		1	ar	issue agie login application say need verify device contact approval press application freeze please aware resolve	Negative	Google Play Store	0	1	1
Google Play Store	1a69eab0-33ef-44d1-9604-830838e143e4	The application is worse than bad... it crashes immediately upon logging in. Lousy app.	Mohammad Mansour	##########			1	en	us		1	ar	application bad bad crash immediately upon log lousy app	Negative	Google Play Store	1	1	0
Google Play Store	df9aef74-9d93-4c1b-8496-b4fe5c24fd2d	I don't know if the purpose of the update is for us to leave the bank or not, but all of my transactions have stopped, and I will be leaving my dealings with the bank soon.	Tamer Adel	##########			1	en	us		1	ar	dont know purpose update us leave bank transactions stop leave dealings bank soon	Negative	Google Play Store	0	1	0
Google Play Store	a2ef4b77-21e2-4404-ba56-d29087ca7159	"He hangs/attaches"	em	##########			0	en	us		1	ar	hangsattaches	Neutral	Google Play Store	0	0	1
Google Play Store	f806c04c-7dd2-45bf-890c-fea2a7883582	The application is very bad and it crashes frequently. Sometimes it starts to lag, even though I'm using Samsung Fold 4. Please improve the application as soon as possible because it is not usable, it increases frustration, and wastes a lot of time for simple tasks. If I use the browser, it's faster. The February update made the program worse; it hangs and kicks me out of the program directly as …	AKA	##########			0	en	us		1	ar	application bad crash frequently sometimes start lag even though im use samsung fold please improve application soon possible usable increase frustration waste lot time simple task use browser fast february update make program bad hang kick program directly soon enter password thank advance	Negative	Google Play Store	1	1	1
Google Play Store	4eed0c59-5c3c-485b-b735-58d26b57b220	Very smooth and wonderful.	Tarek Algeddawy	##########			0	en	us		5	ar	smooth wonderful	Positive	Google Play Store	0	0	0
Google Play Store	c637a2fa-5f68-418f-b1eb-aab63d2d30ef	Nice, but if they could improve the design of the application.	عهودا	##########			0	en	us		5	ar	nice could improve design application	Positive	Google Play Store	1	0	0
Google Play Store	f1b4d048-b16e-4187-94fa-3b7a70a5bc0d	The latest update is very bad, the application cannot be opened from Android phones.	MOHAMED MNDOW	##########			1	en	us		1	ar	late update bad application open android phone	Negative	Google Play Store	1	1	0
Google Play Store	65007308-582f-4368-9e55-f0a69ff8dc4b	There is a problem during the transfer process with the invoice number for Stc pay. When entering the transfer amount, it says that the daily transfer limit has been reached in the past and was not available.	Mobarak yahya	##########			0	en	us		1	ar	problem transfer process invoice number stc pay enter transfer amount say daily transfer limit reach past available	Negative	Google Play Store	0	1	0
Google Play Store	153c72d3-1ceb-4c01-a477-60622b71a722	The program automatically shuts down immediately after it opens...it refuses to work. Please fix the problem.	Nora Moawad	##########			0	en	us		1	ar	program automatically shut immediately opensit refuse work please fix problem	Negative	Google Play Store	0	1	0
Google Play Store	dea3e912-0918-49d6-9061-b0812dbab589	The application shuts down every time I open it.	ahmed abdelmeniem	##########			0	en	us		1	ar	application shut every time open	Negative	Google Play Store	0	1	0
Google Play Store	a91f07a9-0421-4c04-9b66-7056f06b103c	I don't understand how the banking application keeps freezing. Anything done through the application or online gets stuck.	Ala'a Mar'i	##########			0	en	us		1	ar	dont understand bank application keep freeze anything do application online get stick	Negative	Google Play Store	0	0	1
Google Play Store	bb21c983-ac65-4c0b-82e3-7857f7088174	The latest update version is slow and barely able to complete any operation before showing a non-responsive message indicating a malfunction and prompting to close the application.	Saleh Alomari	##########			0	en	us		1	ar	late update version slow barely able complete operation show nonresponsive message indicate malfunction prompt close application	Negative	Google Play Store	0	1	1
Google Play Store	71fa3ebb-c99d-499e-a7ef-cabeee4771ee	"Your application is slow and it freezes a lot, fix it."	Wael A	##########			0	en	us		1	ar	application slow freeze lot fix	Negative	Google Play Store	1	0	1
Google Play Store	0da0a59b-a484-4f3a-8838-e0196b1fec4c	The latest update is a failure and slow... We can no longer use the app.	Noura Rasmi	2023-01-01 08:35:00			0	en	us		1	ar	late update failure slow long use app	Negative	Google Play Store	0	1	1
Google Play Store	04218bb8-6655-4a7c-98cd-c7e15be6aefa	The latest update is bad and it freezes a lot.	Khalid	##########			0	en	us		3	ar	late update bad freeze lot	Negative	Google Play Store	1	0	1
Google Play Store	64dcecf4-de62-4678-bb7c-63e7d5400c3d	The worst banking application, lots of comments about it being very slow, it kicks you out of the app.	FAHAD ALRASHED	##########			0	en	us		1	ar	bad bank application lot comment slow kick app	Negative	Google Play Store	1	0	1
Google Play Store	e1adee50-d72d-41bd-8422-821176f017cf	The program suddenly crashed.	Faisal Alajmi	##########			1	en	us		1	ar	program suddenly crash	Negative	Google Play Store	0	1	0
Google Play Store	b2cfb65a-d3ed-4377-bbf1-5f000699eb35	The last update is very bad, the application hangs.	Majed Alsaggaf	##########			0	en	us		1	ar	last update bad application hang	Negative	Google Play Store	1	0	1
Google Play Store	d8c66ce0-366e-4efc-9a93-e867677b89b3	Very slow on Android.	Khalid Alzahrani	##########			0	en	us		1	ar	slow android	Negative	Google Play Store	0	0	1
Google Play Store	5594ad40-24b8-45d5-9386-41540fd15e2e	one of the worst bank applications; it is too slow and crashes when you click on any button twice, and the Arabic words are not displayed. If they were beginners, they should have developed a better application.	google gmail	##########			2	en	us		1	ar	one bad bank applications slow crash click button twice arabic word display beginners develop good application	Negative	Google Play Store	1	1	1
Google Play Store	59771f66-c029-49f3-b29b-c006bdc9fe7d	An easy, fast, and clear application.	Smart Net	##########			0	en	us		4	ar	easy fast clear application	Positive	Google Play Store	0	0	0
Google Play Store	7a43afe9-113d-4906-a9ac-9f71a846afb4	Very bad experience with Samsung, especially with the Fold.. I have informed multiple employees and sent a complaint, but received no response.	Huda Almoajil	##########			0	en	us		1	ar	bad experience samsung especially fold inform multiple employees send complaint receive response	Negative	Google Play Store	1	0	0
Google Play Store	b0a67728-310e-4c9c-8a9b-b018b53f0082	Slow and bad update	Mosaad Alsuhaimi	##########			0	en	us		1	ar	slow bad update	Negative	Google Play Store	1	0	1
Google Play Store	850e11fe-73f1-4607-b00a-3cb222248ba9	It is often suspended/hangs a lot.	Abdulaziz J	##########			0	en	us		2	ar	often suspendedhangs lot	Negative	Google Play Store	0	0	1
Google Play Store	f4b6a605-05ac-4994-8210-7e1aeef14093	The application is still not working properly on Android devices.	Waleed Ibrahim	##########			0	en	us		1	ar	application still work properly android devices	Negative	Google Play Store	0	1	0
Google Play Store	d21bf7e4-a4c7-430d-b414-ed7c7fd2f5be	Every week there is an update for the application!	Abdul Aleem	##########			0	en	us		1	ar	every week update application	Neutral	Google Play Store	0	1	0
Google Play Store	deceeeae-7304-4962-8c01-c7b68e7a208b	A good and practical application.	waleed huosari	##########			0	en	us		5	ar	good practical application	Positive	Google Play Store	0	0	0
Google Play Store	042e4025-b3ed-432e-b583-bb9242efda90	It is slow and cumbersome, and the process design is complicated. The recent development is not satisfactory, so he does not want to continue because he was only given permission to access the website. It is a stupid program, so he deleted it.	Mohammed Abushawareb	##########			0	en	us		1	ar	slow cumbersome process design complicate recent development satisfactory want continue give permission access website stupid program delete	Negative	Google Play Store	1	0	1
Google Play Store	b787ca6a-a644-4f94-8806-5244deb3fd95	The application is excellent and convenient. I have been using it for some time to manage my accounts.	Mohammed Alshaikh	##########			0	en	us		5	ar	application excellent convenient use time manage account	Positive	Google Play Store	0	0	0
Google Play Store	e33daa4f-77ad-4ba5-a83a-89a6da66c54c	Like shit, and everyone suddenly hangs up or closes.	Ali Alawami	##########			0	en	us		1	ar	like shit everyone suddenly hang close	Negative	Google Play Store	1	0	1
Google Play Store	8f93874c-45f8-4d2c-8d28-bbf93b429e35	The recent updates are causing unexpected crashes, and I am unable to perform any actions as the program keeps malfunctioning.	فلان آل فلان	##########			0	en	us		1	ar	recent update cause unexpected crash unable perform action program keep malfunction	Negative	Google Play Store	0	1	1
Google Play Store	bc456491-7ea9-499f-a95d-c14d98285222	The application is very bad on Android. I waited a long time to receive the verification code, and when it arrives, the keyboard does not appear for me to enter the code. Sometimes it shows that the session has ended, and sometimes we want to verify by calling your phone, so I make a call and activate the phone, but I can't access it. It is a complete struggle just to access the application, know…	Md Zd	##########			0	en	us		1	ar	application bad android wait long time receive verification code arrive keyboard appear enter code sometimes show session end sometimes want verify call phone make call activate phone cant access complete struggle access application know late version cant even enter application without update	Negative	Google Play Store	1	1	0
Google Play Store	266dacbd-8e3a-48d7-b617-a87500d4a740	The program is very slow and I cannot complete any operation, knowing that my device is S22 Ultra.	Abdulrahman Al-Qudah	##########			0	en	us		1	ar	program slow complete operation know device ultra	Negative	Google Play Store	0	0	1
Google Play Store	7b683e08-bc15-4962-860d-518c09a20594	The application was very good in the new version until I downloaded the update. It became unresponsive to requests, heavy, and it automatically closes.	reem yamani	##########			0	en	us		5	ar	application good new version download update become unresponsive request heavy automatically close	Negative	Google Play Store	0	1	1
Google Play Store	965bc537-9bca-4f29-9498-1f101075e2f0	Why does the application request my location? I value privacy and I do not want this additional layer of protection.	Ali Al-Reshaid	##########			0	en	us		2	ar	application request location value privacy want additional layer protection	Negative	Google Play Store	1	1	0
Google Play Store	33ec7455-a469-4fdd-91e8-e90850dc87a2	Easy to use.	jafar al jaroudi	##########			0	en	us		5	ar	easy use	Positive	Google Play Store	0	0	0
Google Play Store	98e0aebd-d90d-43f6-954e-0a577c921f4c	Why does the application request access to the location? After the latest update, the application has become heavy and constantly freezes.	Ahmad AlMoosa	##########			1	en	us		1	ar	application request access location late update application become heavy constantly freeze	Negative	Google Play Store	0	0	1
Google Play Store	5fbd4574-726f-453d-b393-3a97f2b48c03	Now, activating the website requires something frustrating. It has an old and slow interface.	Ali Ghumgham	##########			1	en	us		1	ar	activate website require something frustrate old slow interface	Negative	Google Play Store	1	0	1
Google Play Store	6ad4f417-eed7-4fec-bada-bbc41925b351	I'm not a fan of this app.	ahmed helmy	##########			0	en	us		5	ar	im fan app	Negative	Google Play Store	0	0	0
Google Play Store	c6412d1a-f572-40c3-bc49-6ffacf3f2283	Forcing the client to activate the website in order to use the application is considered a violation of privacy, and you have no right to know the client's location!	Bader Alfalhi	##########			2	en	us		1	ar	force client activate website order use application consider violation privacy right know clients location	Negative	Google Play Store	1	1	0
Google Play Store	bd8ad46a-4c0b-4cd8-ad02-d33fa4912f2a	It cannot be relied upon at all.	Temo Taj	##########			0	en	us		1	ar	rely upon	Negative	Google Play Store	1	0	0
Google Play Store	ed1c5882-6ea6-45ea-a2b7-a99afe5e4d39	The program does not need to ask for my location in order for me to use it.	Mohammed Al-Yami	##########			1	en	us		1	ar	program need ask location order use	Neutral	Google Play Store	1	0	0
Google Play Store	23b5f7c1-c380-4bec-89cc-0be7e59b173d	The application with the new update is not working.	DMK50	##########			0	en	us		1	ar	application new update work	Negative	Google Play Store	0	1	0
Google Play Store	a0e07446-f312-463d-a01d-5cef456642e7	"After the update, the application doesn't work and crashes."	Meshal	##########			0	en	us		1	ar	update application doesnt work crash	Negative	Google Play Store	0	1	1
Google Play Store	0c47afab-1e0b-4d42-8501-c222f85c4418	"Anyone who has a problem with registering the device should change the language of the application to English and follow the same steps."	Mohammed S.Naji	##########			0	en	us		5	ar	anyone problem register device change language application english follow step	Neutral	Google Play Store	0	1	0
Google Play Store	53ef16bf-4303-4149-af5c-e8644a4a1f56	After the recent update, it became very slow.	Faisal Bahfi	##########			0	en	us		4	ar	recent update become slow	Negative	Google Play Store	1	0	1
Google Play Store	0520bf5d-3425-4487-aae1-21704b8434d2	Deserves the award for best banking application.	omar binshikhan	##########			0	en	us		5	ar	deserve award best bank application	Positive	Google Play Store	0	0	0
Google Play Store	0f433adc-15d6-4f1e-9ab0-fc31b3e87325	When logging in, it asks the device to register through a connection, and when registering the device, it gives a network error and cannot access the application account before updating. The update is very bad.	Mohammad Abu Shehada	##########			1	en	us		1	ar	log ask device register connection register device give network error access application account update update bad	Negative	Google Play Store	1	1	0
Google Play Store	2934648d-f9bb-445a-a404-2b8aba8dff06	The worst bank I have ever tried. Every time I try to add a bill, an error appears. I tried another bank and it worked fine. Also, the code always arrives late. You need to find a solution.	yes man	##########			0	en	us		1	ar	bad bank ever try every time try add bill error appear try another bank work fine also code always arrive late need find solution	Negative	Google Play Store	1	1	0
Google Play Store	843a4d7f-b140-495c-930a-fe353eb4ffd9	I have an account at Al-SABB Bank, and the service has been suspended due to the expiration of my residency. A deposit of 500 Riyals was made through an ATM card at the city branch. I request your assistance in returning the amount to me, as the service was suspended without any withdrawals or deposits.	Mohamed El Sayed	##########			0	en	us		1	ar	account alsabb bank service suspend due expiration residency deposit riyals make atm card city branch request assistance return amount service suspend without withdrawals deposit	Negative	Google Play Store	0	1	1
Google Play Store	57098d98-227e-46eb-8bda-bdd9b684f39f	The new design of the application is good, but many problems have been noticed regarding the stability of the application's performance and its speed. Additionally, the accounts are not updated after any operation is performed within the application, making it extremely bad.	Karim Amer	##########			0	en	us		1	ar	new design application good many problems notice regard stability applications performance speed additionally account update operation perform within application make extremely bad	Negative	Google Play Store	1	1	0
Google Play Store	3ed4060b-cac0-4926-84bd-a069be94b001	The application does not read the verification text message (OTP) before logging into the application automatically as it used to before. Instead, the code must be entered manually. I don't know what the problem is.	Sami Algaidi	##########			0	en	us		4	ar	application read verification text message otp log application automatically use instead code must enter manually dont know problem	Negative	Google Play Store	0	1	0
Google Play Store	7cae0766-89e6-4b40-b5af-1518d4a3ec55	Some of the best banks in terms of dealing and transaction completion.	Abdullah Alamoudi	##########			0	en	us		5	ar	best bank term deal transaction completion	Positive	Google Play Store	0	0	0
Google Play Store	a2e9bc19-2c71-46ab-839d-ff9e700e4a3a	Great	Mohammed Elsherbiny	2022-08-07 09:07:00			0	en	us		5	ar	great	Positive	Google Play Store	0	0	0
Google Play Store	7a88dc09-08d9-4229-a8ae-a4eab85297ce	Great bank and excellent services, thank you SAP.	Barakat Ghassan	##########			0	en	us		4	ar	great bank excellent service thank sap	Positive	Google Play Store	0	0	0
Google Play Store	464aabc9-3dcd-44e5-95e7-4c4726f71f93	Bad even after the update, now it's been an hour after the update and I can't enter the application. I restarted the device, deleted the programs, and it's not helpful. The application is truly bad, and its update is worse.	Waleed Alshshareef	##########			0	en	us		1	ar	bad even update hour update cant enter application restart device delete program helpful application truly bad update bad	Negative	Google Play Store	1	1	0
Google Play Store	cbe3bcb5-2cfc-40ba-a270-c5b31a5cd906	The application is excellent and has improved significantly compared to before.	Mohammed Saeed	##########			0	en	us		4	ar	application excellent improve significantly compare	Positive	Google Play Store	1	0	0
Google Play Store	40632dac-ff40-433e-9f79-526eee0426b9	Unfortunately, the bank's services are also poor. Its credit cards are restricted from purchasing on some websites. There are better banks than it.	Muneer Lyati منير لياتي	##########			0	en	us		1	ar	unfortunately bank service also poor credit card restrict purchase websites good bank	Negative	Google Play Store	1	0	0
Google Play Store	34829e9f-307b-4e7d-8a53-3f96235f4753	After the latest update, it became very bad. It keeps disconnecting and freezes a lot.	فيصل الزغيبي	##########			0	en	us		1	ar	late update become bad keep disconnect freeze lot	Negative	Google Play Store	1	0	1
Google Play Store	704d45fc-f9f3-4721-b290-70daea216528	The application needs better development.	Abu Hussain	##########			0	en	us		4	ar	application need good development	Negative	Google Play Store	1	0	0
Google Play Store	8f66d39a-41bc-4c51-98d7-0c6c912c0d19	The new update does not allow me to pay the amount on my credit card. It always says I have to log in again and this is very annoying. Every time I try to make a payment, a notification appears saying that the login session has expired.	hassan abdulwahab	##########			2	en	us		1	ar	new update allow pay amount credit card always say log annoy every time try make payment notification appear say login session expire	Negative	Google Play Store	1	1	0
Google Play Store	4360948f-87a0-4da0-98c1-ed1878bcfd1f	I hope that the focus would be on the practical aspect of the application and leave the aesthetic matters to the design. An example of this is using black color instead of light gray which is not clearly visible. Also, the font should be larger in size since mobile screens are small and cannot be compared to computer screens.	A. Alohali	##########			0	en	us		4	ar	hope focus would practical aspect application leave aesthetic matter design example use black color instead light gray clearly visible also font large size since mobile screen small compare computer screen	Neutral	Google Play Store	1	0	0
Google Play Store	d9eae0f9-a686-4460-99cc-e6f8b26fcd24	The application has become annoying, an error message keeps appearing when entering repeatedly in addition to the frequent updates.	MJA AF	##########			0	en	us		1	ar	application become annoy error message keep appear enter repeatedly addition frequent update	Negative	Google Play Store	1	1	0
Google Play Store	c9a7d40b-5bbb-4cde-a72e-e8ef469b30cb	The program doesn't work in the required manner.	Nasser	##########			0	en	us		1	ar	program doesnt work require manner	Negative	Google Play Store	1	1	0
Google Play Store	ffc76e76-8ba9-4d64-befa-f1707e077e65	The latest update today has a problem with transferring to beneficiaries, when entering the amount there is a forced exit from the program.	nawaf Al Armani	##########			0	en	us		1	ar	late update today problem transfer beneficiaries enter amount force exit program	Negative	Google Play Store	0	1	0
Google Play Store	87283bcc-80ac-4825-8334-6f46c84e78f7	Slow and bad	Wael Hajj	##########			0	en	us		1	ar	slow bad	Negative	Google Play Store	1	0	1
Google Play Store	b5969033-9149-4f3c-a625-1922c636e335	It appears that my mobile phone has been rooted, and there is something strange and peculiar about it. The application is not working, and I am not allowed to access it.	Moon Hope	##########			1	en	us		1	ar	appear mobile phone root something strange peculiar application work allow access	Negative	Google Play Store	1	1	0
Google Play Store	65961df9-317c-4973-ae19-c45d0335c372	The recent update of the SAP application turned out to be very bad... It is slow, takes a long time to open, and keeps spinning in circles without progressing.	Ahmed Eisa	2022-06-01 09:18:00			0	en	us		2	ar	recent update sap application turn bad slow take long time open keep spin circle without progress	Negative	Google Play Store	1	0	1
Google Play Store	a75725ae-644a-40c3-aa16-4125ee15835f	An easy application that only needs some technical updates, but overall a good experience.	Z	##########			0	en	us		4	ar	easy application need technical update overall good experience	Positive	Google Play Store	0	0	0
Google Play Store	1a3f85e0-cd7a-4215-830e-fc918ba53837	I have been trying to access the application for 3 days, but it keeps redirecting me here and getting stuck. There aren't any updates. When will the issue be resolved?	Nora Abdallah	##########			0	en	us		3	ar	try access application days keep redirect get stick arent update issue resolve	Negative	Google Play Store	0	1	1
Google Play Store	1a739815-6594-46f7-9193-7b3979015af9	You have bothered us with a new update every two weeks.	Faisal Hinnwi	##########			0	en	us		1	ar	bother us new update every two weeks	Negative	Google Play Store	1	0	0
Google Play Store	e592bbc1-5e8c-4759-a698-6a6e471010b8	Every update and everyone is worse than the other.	Thmer Ali	##########			0	en	us		1	ar	every update everyone bad	Negative	Google Play Store	1	0	0
Google Play Store	dbd98b64-d148-4582-9ab0-b5967ddf0273	The new version is very bad and deleted all the registered invoices. It brings frustration and stress to the application.	المصمم الصغير	##########			0	en	us		1	ar	new version bad delete register invoice bring frustration stress application	Negative	Google Play Store	1	1	0
Google Play Store	7587d6be-2878-42d1-8296-c91184567f55	Not compatible with Galaxy Fold 3 device. Icons are large and overlapping on the internal screen, and a large portion of the icons disappear on the external screen. The keyboard disappears from the internal screen when I try to enter a transfer amount (no problem when entering a name or other information). When I close the device and try to enter the amount from the external screen, it exits and …	Nad “The calm” Do	##########			0	en	us		2	ar	compatible galaxy fold device icons large overlap internal screen large portion icons disappear external screen keyboard disappear internal screen try enter transfer amount problem enter name information close device try enter amount external screen exit repeat login step begin clear software test compatibility devices unacceptable shortcoming bank size	Negative	Google Play Store	1	1	0
Google Play Store	b2b39be0-b27b-402e-bf6d-3bc811f6ea5f	A new app but it needs an update.	Ryadh Ben Abdeljelil	##########			0	en	us		1	ar	new app need update	Neutral	Google Play Store	1	0	0
Google Play Store	2738f6fa-2ec9-4bed-b62c-791ea46c963c	The latest update is very bad. The application is very slow and freezes.	I A	##########			0	en	us		1	ar	late update bad application slow freeze	Negative	Google Play Store	1	0	1
Google Play Store	33488c05-9ba5-497e-84c0-a7db56b5e78c	The latest update is bad, it lags and is slow.	aws eisa	##########			0	en	us		2	ar	late update bad lag slow	Negative	Google Play Store	1	0	1
Google Play Store	17e26e9b-1b8f-4762-9498-a66b3a11e726	Reliable can be relied upon 👍 (2020) and I repeat it in 2022 👍🏻	khalid N	##########			0	en	us		5	ar	reliable rely upon repeat	Positive	Google Play Store	1	0	0
Google Play Store	d9ac1ad4-6686-458f-9e5e-bda77e007bbf	Worst baking experience with SABB, can't compare with AWWAL professional banking. May God remember AWWAL bank with all good.	Sohail Raja	##########			0	en	us		1	ar	bad bake experience sabb cant compare awwal professional bank may god remember awwal bank good	Negative	Google Play Store	1	1	0
Google Play Store	7adb48ea-8efa-456c-be32-e781ed293103	The application has become very bad after the latest update. It takes a very long time to navigate between pages.	Maz M	##########			0	en	us		1	ar	application become bad late update take long time navigate page	Negative	Google Play Store	1	0	1
Google Play Store	458cda3d-fff5-474f-b96e-e28d3e319366	The application has become very slow, and the number of steps to access the desired service has increased. Please work on improving the speed of navigation between pages.	ali hammoud	##########			0	en	us		3	ar	application become slow number step access desire service increase please work improve speed navigation page	Negative	Google Play Store	0	0	1
Google Play Store	58baf38c-54ff-43bb-ab2c-ecb011396d1b	The most beautiful and elegant banking system I've ever come across, organized, easy to use online, and easy with HSBC system and trading. The employees are top-notch in sophistication and excellent service. The best banking experience, especially at the Badia branch. Mr. Abdulaziz, I take my hat off to you. However, there is a delay in receiving international transfers other than that, it's a fi…	Aladdin Siry	##########			0	en	us		5	ar	beautiful elegant bank system ive ever come across organize easy use online easy hsbc system trade employees topnotch sophistication excellent service best bank experience especially badia branch mr abdulaziz take hat however delay receive international transfer firstclass bank	Positive	Google Play Store	1	0	1
Google Play Store	4e94fb29-d85d-4237-bc80-d01081c16846	Good	Yasser Mohammed	##########			0	en	us		3	ar	good	Positive	Google Play Store	0	0	0
Google Play Store	c0b75894-4f5e-48d6-99b2-f4cbadef41fe	The application is always freezing and not opening.	Jehan Kattoa	##########			0	en	us		1	ar	application always freeze open	Negative	Google Play Store	1	1	1
Google Play Store	00d16ed1-efdf-48b9-baa5-65eae0a51f7e	After the modification, it became very bad.	Heba Mohamed	##########			0	en	us		1	ar	modification become bad	Negative	Google Play Store	1	0	0
Google Play Store	f612521d-80f2-4efa-a0af-770654eb635f	The update makes you connect.	Ali Al Meshamea	2022-04-01 09:06:00			0	en	us		1	ar	update make connect	Positive	Google Play Store	0	1	0
Google Play Store	bbd03a20-712f-4aef-a9ae-ca31e785c58e	The update is not working, and the whole application is not functioning properly until it is updated. Please solve the problem as soon as possible.	Qutaibah Omari	##########			0	en	us		1	ar	update work whole application function properly update please solve problem soon possible	Negative	Google Play Store	0	1	0
Google Play Store	dd429045-1af9-4ee9-8fa8-b33cb28d3571	If it was any worse, I would have given a bad application rating, the bank services are worse, and the employees' behavior is unprofessional. When I ask them about any information, they say they don't know. I raised a complaint at the specialized branch, but the situation didn't improve and the application is still blocking me.	DALAL MOHAMED	##########			0	en	us		1	ar	bad would give bad application rat bank service bad employees behavior unprofessional ask information say dont know raise complaint specialize branch situation didnt improve application still block	Negative	Google Play Store	1	1	0
Google Play Store	e3ccf9ea-0a19-44af-8aef-8ef13982fd0e	Many colors are difficult to use on the Samsung Fold mobile.	Hattan Kattoah	##########			1	en	us		2	ar	many color difficult use samsung fold mobile	Negative	Google Play Store	1	0	0
Google Play Store	7e39257b-9900-4048-a494-ad755a73dc83	Improved after the update but still slow.	Abos3d	##########			0	en	us		4	ar	improve update still slow	Negative	Google Play Store	1	0	1
Google Play Store	e4bcc4b7-3963-4fdc-81b9-c843a1baf9d8	Excellent, fast, and clear.	Hamza Khayyat	##########			0	en	us		5	ar	excellent fast clear	Positive	Google Play Store	0	0	0
Google Play Store	168736db-599a-44c4-80ba-45a04ac60d29	The update is very bad for Android.. It starts in English and when switching to Arabic, it does not change.	M.I A	##########			0	en	us		1	ar	update bad android start english switch arabic change	Negative	Google Play Store	1	0	0
Google Play Store	92ff3ba4-8850-48a9-8e38-c48d54a622dd	Yanook is advancing in online services, while the new update for Bank SABB is going backwards!	ATB the Critic	2022-03-09 07:02:00			1	en	us		1	ar	yanook advance online service new update bank sabb go backwards	Neutral	Google Play Store	0	0	0
Google Play Store	07d8463f-08c1-468f-98a8-862de931d136	The new update is very bad.	Meshal Alabdulkarim	##########	عزيزي Meshal نرجو منك تحميل التحديث الجديد لتطبيق ساب موبايل و المحاولة مرة أخرى، و في حال واجهتك نفس المشكلة الرجاء التواصل معنا و إرفاق صورة للمشكلة مع معلومات التواصل الخاصة بك عن طريق البريد الإلكتروني أدناه sabbcustomercare@sabb.com مع خالص تحياتنا فريق العناية بعملاء ساب	##########	0	en	us		1	ar	new update bad	Negative	Google Play Store	1	0	0
Google Play Store	e25628cc-3d5f-407b-8eb0-66e6969cdd5b	Last update is ridiculous, I can't do anything, it always logs me out. Please, you are a big bank, this is not acceptable. The way it is, I can't even enter the IBAN for the transfer. A big bank like this should find a solution.	mohammed yahia	##########			0	en	us		1	ar	last update ridiculous cant anything always log please big bank acceptable way cant even enter iban transfer big bank like find solution	Negative	Google Play Store	1	1	0
Google Play Store	08749584-6bd3-45ca-892c-6263e6cd8bcf	Whoever switches to the Arabic language refuses to enter the program.	Mori Dizer	##########			1	en	us		1	ar	whoever switch arabic language refuse enter program	Negative	Google Play Store	0	1	0
Google Play Store	6867dc79-64c8-46c4-ba7b-279c0db7f2da	The new update is not worse, but when switching to Arabic language, it freezes and does not open at all unless the application is uninstalled and reinstalled. Only the English language works.	Sherif Alsadek	##########			1	en	us		1	ar	new update bad switch arabic language freeze open unless application uninstalled reinstall english language work	Negative	Google Play Store	1	1	0
Google Play Store	825c3a2a-05ef-4400-91b0-eb8099008a56	"If you change the program to Arabic, it won't open, it only opens in English."	alaa abuobaid	##########			0	en	us		1	ar	change program arabic wont open open english	Neutral	Google Play Store	0	1	0
Google Play Store	a99a55a9-ca2a-433b-ade4-0fd21286a6e6	The new update is very, very, very, very, very, very, very, very, very, very, very, very bad. Unfortunately, the services are declining.	Ibrahem Salameh	##########			0	en	us		1	ar	new update bad unfortunately service decline	Negative	Google Play Store	1	0	0
Google Play Store	18dd9efa-da12-469b-868e-3b91c852c3c4	The program doesn't work every time; I have to uninstall it and reinstall it again to make it work.	mina youssef	##########			0	en	us		1	ar	program doesnt work every time uninstall reinstall make work	Negative	Google Play Store	0	1	0
Google Play Store	d1ca2717-dc39-46d6-a3ec-08e4ac2f6444	The application has become very bad, slow, and faulty. It is a problem that I cannot enter to pay the fees for the companions, and you cannot because it does not give you more than the day you are in, meaning that you cannot set a future date. Please update.	Mohamed Alatroush	##########			0	en	us		1	ar	application become bad slow faulty problem enter pay fee companion give day mean set future date please update	Negative	Google Play Store	1	1	1
Google Play Store	e1d10aca-2f55-403c-977b-6af2350e892d	evolution from previous	Baha Abushama	##########			0	en	us		3	ar	evolution previous	Neutral	Google Play Store	1	0	0
Google Play Store	873d9d0c-c9bc-4577-bb2d-bd48ba07316f	Failed bank, the worst application, and the worstcustomer service - the worst day ever was when the first bank merged with them. They are extremely incompetent, and in the end, I canceled all the cards.	Mohammed Althbite	##########			0	en	us		1	ar	fail bank bad application worstcustomer service bad day ever first bank merge extremely incompetent end cancel card	Negative	Google Play Store	1	1	0
Google Play Store	778eccb6-03aa-4eab-a13d-1c8c439d7a97	Praise be to Allah for the blessing of Alinma Bank. May Allah not deprive us of it.	azoooz zakour	##########			0	en	us		1	ar	praise allah bless alinma bank may allah deprive us	Positive	Google Play Store	1	0	0
Google Play Store	c50f3192-9366-432f-b09a-1906882a7086	This bank is terrible, the service is terrible, and it has the dumbest banking system on the face of the Earth.	Ahmed Ghoniem (HavocKnight)	##########			0	en	us		1	ar	bank terrible service terrible dumb bank system face earth	Negative	Google Play Store	1	0	0
Google Play Store	6827ee89-cedc-4d54-974b-b40d24732cb2	By God, it is the worst bank, but it is close to being established with the help of it.	raed alyamani (Roody)	##########			0	en	us		1	ar	god bad bank close establish help	Negative	Google Play Store	1	0	0
Google Play Store	4b96daf8-bf41-4b58-abb9-adae2612cb95	Enjoyable creativity	ABDULAZIZ VINESSE	##########			0	en	us		5	ar	enjoyable creativity	Positive	Google Play Store	0	0	0
Google Play Store	4f251179-0b4e-418c-9de1-2bb08b3330c5	Extremely bad, and each update is worse, unfortunately. They even changed the appearance so that they can't see what people are writing. The latest trick in the app is that the cards are gray and the writing on them is slightly darker gray, which means you can't tell which card belongs to which account.	Swan Digital	##########			0	en	us		1	ar	extremely bad update bad unfortunately even change appearance cant see people write late trick app card gray write slightly dark gray mean cant tell card belong account	Negative	Google Play Store	1	1	0
Google Play Store	86d8af46-a4cc-4a0d-8b25-2fa1b7506ff0	Better than it used to be before.	Hussein Abdulhalim	##########			0	en	us		3	ar	good use	Positive	Google Play Store	0	0	0
Google Play Store	1d21872a-b1a3-4f3e-9722-9904aa720715	Bad application and worse bank	Mohammed F	##########			0	en	us		1	ar	bad application bad bank	Negative	Google Play Store	1	0	0
Google Play Store	f7cdaf8b-b541-4d28-bb44-435f265f3a53	When you transfer an amount to an international bank, they ask you to confirm without displaying the value of the transfer in foreign currency.	Cherif Cherif	##########			1	fr	us		2	ar	transfer amount international bank ask confirm without display value transfer foreign currency	Neutral	Google Play Store	0	1	0
Google Play Store	2a2eab40-3fe7-4bcb-9a2c-d426690c642b	It does not befit a prestigious bank with a reputation in the market to have an application with such a low level, characterized by extreme slowness in performing the required tasks. I am not satisfied at all. Unfortunately, it used to be much better in the past, but it is still bad. The response to customer orders is slow and sometimes even nonexistent.	Zorro Xyx	##########			28	ar	us		1	ar	befit prestigious bank reputation market application low level characterize extreme slowness perform require task satisfy unfortunately use much good past still bad response customer order slow sometimes even nonexistent	Negative	Google Play Store	1	0	1
Google Play Store	72df5cd6-dc37-42ea-a5fc-277bff400d06	"He was good, but in his last days, when he entered the password correctly, it would say it's wrong. Now he has either been blocked or he refuses to return."	بو واحد المجهول	##########			0	ar	us		1	ar	good last days enter password correctly would say wrong either block refuse return	Negative	Google Play Store	1	1	0
Google Play Store	50e69dde-cd97-40ae-8c1c-297ab3c065e9	Good.	M.h 7rbyn	##########			0	ar	us		3	ar	good	Positive	Google Play Store	0	0	0
Google Play Store	1936b624-6cb6-4049-aa95-3964aa635778	Excellent	anwar awadh	##########			0	ar	us		4	ar	excellent	Positive	Google Play Store	0	0	0
Google Play Store	c0081005-6d47-49d0-941f-da308d723283	Very bad	Vertu KSA	2023-09-09 09:04:00			0	ar	us		1	ar	bad	Negative	Google Play Store	1	0	0
Google Play Store	ac53d996-1f08-4734-a4c1-b18f11293cc4	Mashallah, Tabarakallah. O Allah, increase and bless.	Majid Hassan	##########			0	ar	us		5	ar	mashallah tabarakallah allah increase bless	Positive	Google Play Store	1	0	0
Google Play Store	93d97a61-4e4e-4609-8a85-53cc53c1b0dd	The application is not functioning.	Salha Saad	##########			0	ar	us		1	ar	application function	Negative	Google Play Store	0	1	0
Google Play Store	9fe96a8c-d9fa-43bc-9f49-cb7a0bf65b68	Very beautiful	Ali Bu Hassan	2023-09-03 02:14:00			0	ar	us		5	ar	beautiful	Positive	Google Play Store	0	0	0
Google Play Store	500de82a-122a-4d25-8779-c83f5e757cc5	"Please pay attention."	Mostafa	##########			0	ar	us		1	ar	please pay attention	Neutral	Google Play Store	1	0	0
Google Play Store	9f60eae7-8e2c-4083-98b7-cb0c5cdc88a3	The updates are supposed to be for the better, but with you, the updates always turn out for the worse. The service is bad from the branches, the phone banking, the application, and all the services.	أبو يارا	##########			5	ar	us		1	ar	update suppose good update always turn bad service bad branch phone bank application service	Negative	Google Play Store	1	0	0
Google Play Store	9306f47b-9f72-4378-89b4-34352cb4e559	Unfortunately, the worst bank I have ever dealt with is the one I go to in order to pay my mobile bill through the Zain app. It always does the opposite of what I want. I also want to recharge my phone the same way and request it through the McDonald's app too.	محمد الناصر	##########			0	ar	us		1	ar	unfortunately bad bank ever deal one go order pay mobile bill zain app always opposite want also want recharge phone way request mcdonalds app	Negative	Google Play Store	1	0	0
Google Play Store	3dd66a17-65c1-460f-ad26-48e98aa9f9c7	Very bad, it asks for device authentication through access and then asks for the same authentication again. Extremely bad and needs to be modified. And what's the deal with the token? We have never dealt with this before. Fix it.	Nabil Zahid	##########			6	ar	us		1	ar	bad ask device authentication access ask authentication extremely bad need modify whats deal token never deal fix	Negative	Google Play Store	1	1	0
Google Play Store	cd8c240a-b627-49d4-ba06-a81d977b8a93	Thank you in advance	Mohammed AlRashed	##########			0	ar	us		5	ar	thank advance	Positive	Google Play Store	0	0	0
Google Play Store	2df112a3-f9ee-49f3-a6ca-5d4f8915767b	How long will the system remain out of service due to some technical malfunctions for two days, and the problem still persists?	فارس الحاتمي	##########			0	ar	us		2	ar	long system remain service due technical malfunction two days problem still persist	Negative	Google Play Store	0	1	0
Google Play Store	c40e7c77-c7cc-4595-8a64-5dc576ac998f	The application is not working.	أبو حسين الشرعبي	##########			0	ar	us		1	ar	application work	Negative	Google Play Store	0	1	0
Google Play Store	424e704e-abd9-4986-a78f-5243c4a33b89	Now the application has become a good one, it does not return to the homepage after logging in.	Mahrous Hassan	##########			0	ar	us		4	ar	application become good one return homepage log	Positive	Google Play Store	1	0	0
Google Play Store	250e7deb-8041-4e9e-95ce-6b29da458673	Why do I have to enable the website service in order to open the application? I hope it can be cancelled.	AaA AaA	##########			0	ar	us		3	ar	enable website service order open application hope cancel	Negative	Google Play Store	0	1	0
Google Play Store	879b660a-3275-47cd-ad35-d6e3e51d530d	Very bad bank, I advise everyone not to open accounts with them honestly and they don't deserve a star.	ABDULAZIZ MOTKAR	##########			0	ar	us		1	ar	bad bank advise everyone open account honestly dont deserve star	Negative	Google Play Store	1	0	0
Google Play Store	04964190-2c12-4713-8bd6-f122ab7a33a5	Bad, bad, bad, bad, bad. Delete it with dignity.	AHMED SAEED	##########			0	ar	us		1	ar	bad bad bad bad bad delete dignity	Negative	Google Play Store	1	0	0
Google Play Store	3bb0ad92-996a-46aa-963a-b7dd2d8d0f66	Very good.	Nabila Kawa	##########			0	ar	us		4	ar	good	Positive	Google Play Store	0	0	0
Google Play Store	799ba695-8096-40c8-b641-6044085ab8a7	Customer service is excellent and very sophisticated ♥️♥️♥️♥️♥️	عبدالله احمد	##########			0	ar	us		5	ar	customer service excellent sophisticate	Positive	Google Play Store	0	0	0
Google Play Store	661c5001-4f75-41f9-a803-bde451ff30ae	The problem has been solved, may God bless you.	Abdullah ali	##########			0	ar	us		5	ar	problem solve may god bless	Positive	Google Play Store	1	0	0
Google Play Store	2e000bb3-522f-463f-b1a6-49b83fa7c19c	Failure in all updates for more than two years indicates a lack of customer care and indifference.	Ali Al	##########			1	ar	us		1	ar	failure update two years indicate lack customer care indifference	Negative	Google Play Store	1	1	0
Google Play Store	572ed249-ccff-4b6c-8491-23145a1594ce	Brief and useful.	ابونواف ابونواف	##########			0	ar	us		5	ar	brief useful	Positive	Google Play Store	1	0	0
Google Play Store	a8cccf75-e927-4cf5-900d-e10d2067d50d	Excellent.	Zo Zo	##########			0	ar	us		5	ar	excellent	Positive	Google Play Store	0	0	0
Google Play Store	1bc8a09b-5462-46d1-8f4d-f678a112f465	Thank you	محمد موسى	2023-08-09 08:33:00			0	ar	us		5	ar	thank	Positive	Google Play Store	0	0	0
Google Play Store	a70ea285-ecd2-430f-a0e0-8621cc93481d	When does the app start working after registering on Nezad?	Mahmoud Gamal	##########			0	ar	us		1	ar	app start work register nezad	Neutral	Google Play Store	0	1	0
Google Play Store	6fbd3816-68bc-48f4-bb16-2235d251352f	The worst banking application.	Hossam Ali	##########			0	ar	us		1	ar	bad bank application	Negative	Google Play Store	1	0	0
Google Play Store	ba3c237b-547c-473a-a8c8-efac32639d09	It's unbelievable! 14 years as a bank customer, and until now I haven't been able to register on the app due to its failure. And with the latest update, the app shows a message saying that your device is too old, even though I got it from them.	أمجد نجيب	##########			0	ar	us		1	ar	unbelievable years bank customer havent able register app due failure late update app show message say device old even though get	Negative	Google Play Store	1	1	0
Google Play Store	f7614926-4298-4c4d-b99a-b4cbc6c051f8	The application is very bad, it freezes, crashes, and they have no intention of fixing it because the issue is complicated.	Ibrahim Alsuraij	2023-08-07 04:22:00			0	ar	us		1	ar	application bad freeze crash intention fix issue complicate	Negative	Google Play Store	1	1	1
Google Play Store	173ace03-80e0-42a4-ade6-ece54394e800	A strange application that only brings you sorrow and misery.	ابراهيم محمد الشريف Ibrahim alshareef	##########			0	ar	us		1	ar	strange application bring sorrow misery	Negative	Google Play Store	1	0	0
Google Play Store	69625c98-dc88-4e7d-babd-3cbefb258541	Unfortunately, my account has been banned. I tried to enter the correct ATM information, but it was still wrong and my account got banned. I don't know the reason for the ban. This application is the worst.	Fatimah Alshehri	##########			1	ar	us		1	ar	unfortunately account ban try enter correct atm information still wrong account get ban dont know reason ban application bad	Negative	Google Play Store	1	1	0
Google Play Store	fe37628a-6bef-4b07-b7b3-070cb0942f00	Much better than before, thank you very much.	suad salam	##########			0	ar	us		5	ar	much good thank much	Positive	Google Play Store	0	0	0
Google Play Store	d4341fb1-6462-4bea-bf1d-b9620baaf878	Very bad	قناة مكس	2023-08-05 09:35:00			0	ar	us		1	ar	bad	Negative	Google Play Store	1	0	0
Google Play Store	8d8020bb-7501-4853-ae06-673b948d488b	bad	سراج الزاير	2023-08-05 03:35:00			0	ar	us		1	ar	bad	Negative	Google Play Store	1	0	0
Google Play Store	f61d7541-d298-4849-a6de-16db9e1abcbe	Not bad, but failed. Loading failed. Verify and enter the code. Take a picture of your face and get closer, smile. And after an hour, the login was unsuccessful. Try again after a month.	Hisham Ali	##########			0	ar	us		1	ar	bad fail load fail verify enter code take picture face get close smile hour login unsuccessful try month	Negative	Google Play Store	1	1	0
Google Play Store	11107409-cce9-4b98-969e-eac1d8d0a390	The entry is very bad !!!!!!!!!	خالد محمود	##########			0	ar	us		1	ar	entry bad	Negative	Google Play Store	1	0	0
Google Play Store	1d3ad008-5ca1-4f4b-99b0-00d873731057	Very very bad, unfortunately.	Quad Alrass	##########			0	ar	us		1	ar	bad unfortunately	Negative	Google Play Store	1	0	0
Google Play Store	66e5b75e-c9af-44b0-b674-d92befbb2487	Very bad👎👎👎👎👎👎👎	ثامر عبدالله الزهراني	##########			0	ar	us		1	ar	bad	Negative	Google Play Store	1	0	0
Google Play Store	ce206233-c305-45be-8c19-b8eccb4a1da5	Excellent service	H H	##########			0	ar	us		5	ar	excellent service	Positive	Google Play Store	0	0	0
Google Play Store	cd711f22-c4ea-43b5-b2ca-dd0a92cdbf4b	"Masha Allah Tabarak Allah"	عبدالله منصور	##########			0	ar	us		5	ar	masha allah tabarak allah	Neutral	Google Play Store	1	0	0
Google Play Store	f79fd17b-0370-41ff-b0ea-d001d83b303d	Very good.	اكرم ابو حلاوة	##########			0	ar	us		5	ar	good	Positive	Google Play Store	0	0	0
Google Play Store	90f8ac1a-bdf6-4fcd-ab9f-44f09384ff38	The worst bank and the worst service, with an application that crashes every second.	ال شيبان	##########			0	ar	us		1	ar	bad bank bad service application crash every second	Negative	Google Play Store	1	1	0
Google Play Store	ee438afa-d452-4450-b97b-61982e29f79a	Beautiful	Khaled Al Dossari	##########			0	ar	us		5	ar	beautiful	Positive	Google Play Store	0	0	0
Google Play Store	a0a5c74c-9cb2-4a2b-a6bf-1421f8a0eb9b	The application is not working.	انترنت مجاني	##########			0	ar	us		1	ar	application work	Negative	Google Play Store	0	1	0
Google Play Store	1f12a965-82c3-4873-9eab-c02e4da449fa	The application needs an update because it doesn't always open the login. Please solve the problem as soon as possible.	Bawazir 19	##########			2	ar	us		1	ar	application need update doesnt always open login please solve problem soon possible	Negative	Google Play Store	0	1	0
Google Play Store	2eed45b3-ce07-4fe7-bf76-9c5cc94e9b85	"Very useful application"	Mohamed Tamessah	##########			0	ar	us		1	ar	useful application	Positive	Google Play Store	0	0	0
Google Play Store	52c314a3-8740-4870-a96e-a9658cb9e8a6	Bad application	سمير الزغبي	##########			0	ar	us		1	ar	bad application	Negative	Google Play Store	1	0	0
Google Play Store	644ed809-9134-4a93-b9c3-4cc0a5147ae7	An application that does not accept the installment service for credit cards, while SABB bank accepts it. However, through the website, it accepts it. If you have a problem with this, it is considered a flaw in the bank.	Hassan Alshehri	##########			0	ar	us		1	ar	application accept installment service credit card sabb bank accept however website accept problem consider flaw bank	Negative	Google Play Store	1	1	0
Google Play Store	07f0d4e5-a13f-4a20-98c2-72181879c2a5	It's not possible to have an update every other day. At most, gather all the updates every three months. The constant updating is very annoying. Moreover, the previous update is causing malfunctions and not functioning properly like other applications!	A F	##########			132	ar	us		1	ar	possible update every day gather update every three months constant update annoy moreover previous update cause malfunction function properly like applications	Negative	Google Play Store	1	1	0
Google Play Store	2c771ccc-7100-4aa1-9cae-d4df7dad2173	The application is very bad, it logs in twice, with extreme slowness.	محمد علي	##########			0	ar	us		1	ar	application bad log twice extreme slowness	Negative	Google Play Store	1	1	1
Google Play Store	2d53375f-836f-4a49-9cb5-5e90cb0667a6	There is improvement.	موسي حسين	##########			0	ar	us		4	ar	improvement	Positive	Google Play Store	0	0	0
Google Play Store	3eb9ddf8-375e-4d61-8088-a43d2f982078	Failed bank	CAR18	##########			0	ar	us		1	ar	fail bank	Negative	Google Play Store	1	1	0
Google Play Store	cc5692c4-85e2-4c89-bdd1-c5fe6225378b	Cannot modify password	M Alansari	##########			0	ar	us		1	ar	modify password	Neutral	Google Play Store	1	1	0
Google Play Store	b890f253-9f4d-48a3-a8db-a24fdeba2bb1	The application is very excellent and easy, and it has services that do not exist in other banks. The interface and colors are pleasing after the new update. All the problems have been solved. Thank you. It is one of the best banks I have dealt with in terms of loans, credit cards, and services.	ala momo	##########			2	ar	us		5	ar	application excellent easy service exist bank interface color please new update problems solve thank one best bank deal term loan credit card service	Positive	Google Play Store	1	0	0
Google Play Store	d6c327e8-7285-4ff7-af59-e8ed4111b4cc	All beneficiaries are not present and invoices have been removed. The application was uninstalled and reinstalled and the beneficiaries reappeared, but the invoices did not show up. When trying to add a new invoice, it says it already exists, but it doesn't appear in your application or network.	قبعة صوف	##########			0	ar	us		1	ar	beneficiaries present invoice remove application uninstalled reinstall beneficiaries reappear invoice show try add new invoice say already exist doesnt appear application network	Negative	Google Play Store	0	1	0
Google Play Store	86e6f75b-2b1f-4baa-a23b-39451fee503c	The application is a failure.	علي الحارثي	##########			0	ar	us		1	ar	application failure	Negative	Google Play Store	0	1	0
Google Play Store	aa2b0a90-6b74-4b22-929d-8d46b9d9f6e4	The latest update is the worst update, it's very bad. It keeps asking for the location, and if I enter the application, it freezes and kicks me out of the app. I'm tired of trying, brother. We have work to do, find a solution for us quickly. I need the services, I'm exhausted. Find a solution for us. Also, I want to add that I changed my phone and it refused authentication, and every time it redi…	nona nona	##########			0	ar	us		1	ar	late update bad update bad keep ask location enter application freeze kick app im tire try brother work find solution us quickly need service im exhaust find solution us also want add change phone refuse authentication every time redirect nafath im tire authenticate nafath refuse register device application god much long like	Negative	Google Play Store	1	1	0
Google Play Store	72d13fcc-2dac-4b69-a33f-32ba2502118b	Beautiful, wonderful, and easy to use application.	Yaser Alali	##########			0	ar	us		5	ar	beautiful wonderful easy use application	Positive	Google Play Store	0	0	0
Google Play Store	0d6fad64-29ef-4619-b060-7275c018b9be	Very bad	Chef Hassan	##########			0	ar	us		1	ar	bad	Negative	Google Play Store	1	0	0
Google Play Store	1ecd034a-96e2-4055-9d33-d94922e6a475	One of the worst banks in the Saudi market, complicated procedures, dealing with an outdated mindset, injustice towards a financial company and an installment office. If you compare this bank to them, you will realize that the system is constantly updating, but the updates cause malfunctions and glitches for them. On top of that, their employees keep calling and offering loans and visas, causing …	خالد حمد	##########			0	ar	us		1	ar	one bad bank saudi market complicate procedures deal outdated mindset injustice towards financial company installment office compare bank realize system constantly update update cause malfunction glitches top employees keep call offer loan visa cause unnecessary annoyance order achieve monthly target enter application ask register access application access application work perfectly fine applicat…	Negative	Google Play Store	1	1	0
Google Play Store	d739950e-67e5-492b-87d1-3c10dfa161fd	Very slow.	عواض النفيعي	##########			0	ar	us		1	ar	slow	Negative	Google Play Store	0	0	1
Google Play Store	fe5fbec9-7051-4c88-a22b-1969c7825eef	We hope for more development.	ابو يزيد	##########			0	ar	us		4	ar	hope development	Positive	Google Play Store	1	0	0
Google Play Store	414434bd-f52b-4382-849b-b0bed8fdf218	Excellent application takes care of everything for you.	Ismail Alnaeb	##########			0	ar	us		5	ar	excellent application take care everything	Positive	Google Play Store	0	0	0
Google Play Store	4bb96a9e-4930-49d4-8d72-e6353d8a61f8	Very good and we hope for more development.	أبو عبدالرحمن	2023-07-05 06:15:00			0	ar	us		4	ar	good hope development	Positive	Google Play Store	0	0	0
Google Play Store	55648f79-26ad-488d-abb0-cbf3a882cb85	Very good.	علي بن سعد الزنان	2023-07-05 03:36:00			0	ar	us		5	ar	good	Positive	Google Play Store	0	0	0
Google Play Store	8573cf50-c1c7-4c95-859c-e8e9de49cf99	Failed	FOX12	##########			0	ar	us		1	ar	fail	Negative	Google Play Store	0	1	0
Google Play Store	d117940f-8d33-479b-a7fd-62abd2138cf9	"The application does not allow me to log in, and I have changed the device, but the problem still remains."	Yasir Asiri	##########			0	ar	us		1	ar	application allow log change device problem still remain	Negative	Google Play Store	0	1	0
Google Play Store	bc60353c-30c2-40c6-aa56-b79eb696e891	Wonderful	محمد شمان (‪sheemow sheemoo‬‏)	2023-07-01 09:31:00			0	ar	us		5	ar	wonderful	Positive	Google Play Store	0	0	0
Google Play Store	90242526-5093-4414-823d-74a80eac5baf	Very excellent bank, better than other banks.	Adel Alkatheri	##########			0	ar	us		5	ar	excellent bank good bank	Positive	Google Play Store	0	0	0
Google Play Store	a6251a22-fa91-47b4-8c0e-36e3eb856af0	The latest update has resolved all previous issues.	Faisal bin salman	##########			15	ar	us		4	ar	late update resolve previous issue	Neutral	Google Play Store	0	1	0
Google Play Store	7eee77c3-cdc3-4cb7-9d96-d5583258187a	"The best and easiest banking application I have come across .. Thank you."	Bn Khalid	##########			0	ar	us		5	ar	best easy bank application come across thank	Positive	Google Play Store	0	0	0
Google Play Store	bea1842e-12f8-441d-8dc2-d1aaab037ec6	The application is very bad after the update. The confirmation message only arrives after several attempts. It is impossible to rely on the application for my banking transactions.	Mouth Alharbi	##########			0	ar	us		1	ar	application bad update confirmation message arrive several attempt impossible rely application bank transactions	Negative	Google Play Store	1	1	0
Google Play Store	0f04a16d-ac8c-43cf-8cbd-a36f56861b55	The app has not been downloaded.	ضياء الحاجي	##########			0	ar	us		5	ar	app download	Neutral	Google Play Store	0	1	0
Google Play Store	f2932347-bf6f-402b-959a-162308d0d5d7	It does not work.	ابو عبدالعزيز	##########			0	ar	us		1	ar	work	Negative	Google Play Store	0	1	0
Google Play Store	e2a7a36b-9560-465a-a7e8-2a6a4eb0ae5d	Good	Abdulrahman Al-Salem	##########			0	ar	us		5	ar	good	Positive	Google Play Store	0	0	0
Google Play Store	f56d443a-6d94-43d2-a7d3-3eea441a3950	"An easy and convenient application that helps you complete your financial tasks quickly."	abokhaled n	##########			0	ar	us		4	ar	easy convenient application help complete financial task quickly	Positive	Google Play Store	0	0	0
Google Play Store	6a0c0e5a-56ae-4f2b-964d-9017d7105b40	The application does not open easily and the password does not reach from the messages. Please solve the problem with the application.	Aff Kko	##########			0	ar	us		1	ar	application open easily password reach message please solve problem application	Negative	Google Play Store	0	1	0
Google Play Store	f031890c-8f9a-478a-a0f6-9fe016bd2c85	Very excellent	Alaa Abusaifan	##########			0	ar	us		5	ar	excellent	Positive	Google Play Store	0	0	0
Google Play Store	1b431533-e8c7-41f0-a632-7bb0fe82206a	This is an excellent service.	Calituni Tuni	##########			0	ar	us		5	ar	excellent service	Positive	Google Play Store	0	0	0
Google Play Store	4505f844-e3a3-4e86-8aea-172645c0ed0b	Beautiful, wonderful, and easy application.	أبو أسامة	##########			0	ar	us		5	ar	beautiful wonderful easy application	Positive	Google Play Store	0	0	0
Google Play Store	817d5b54-1cb0-47ce-8054-359b59314d99	The worst bank.	I	##########			0	ar	us		1	ar	bad bank	Negative	Google Play Store	1	0	0
Google Play Store	82be2489-c96b-4d4b-bfd1-32858ecc4c67	What is this the worst application that hangs a lot? May God help us with you.	عبدالله	##########			0	ar	us		1	ar	bad application hang lot may god help us	Negative	Google Play Store	1	0	1
Google Play Store	78a8a572-2999-4951-82a0-d8f0f6e759bd	If there was a half star, I would give you very bad, the worst bank and application. 👎👎	Nariman Mohammad	##########			0	ar	us		1	ar	half star would give bad bad bank application	Negative	Google Play Store	1	0	0
Google Play Store	a5a53b97-6c56-4442-a031-28d016bb2957	I was unable to log in from my mobile phone, all of my attempts were unsuccessful in every way.	وليد خالد	##########			0	ar	us		1	ar	unable log mobile phone attempt unsuccessful every way	Negative	Google Play Store	1	1	0
Google Play Store	667004b7-735b-497d-afff-1b0d534ede2d	The application is the worst. Looks like I'll be transferring my account to another bank. I'm currently trying to update the application, but it's useless. It's a failure. Bring back the old system.	دام عزك يابلادي	##########			0	ar	us		1	ar	application bad look like ill transfer account another bank im currently try update application useless failure bring back old system	Negative	Google Play Store	1	1	0
Google Play Store	e343d87d-f96d-43be-b140-a5229b6a8c0f	The worst application	ابو محمد	##########			0	ar	us		1	ar	bad application	Negative	Google Play Store	1	0	0
Google Play Store	ce9ca694-62c3-40d5-b0c7-8a7bbdc9b0cf	He is delayed in documentation, perhaps.	عبد المحسن حميد (أبو سلطان)	##########			0	ar	us		1	ar	delay documentation perhaps	Neutral	Google Play Store	0	0	1
Google Play Store	e958362c-59a6-42fa-98f7-eb085ac81c7f	The application does not open, it is the worst after the update. They messed it up even more! When I enter the verification code, it gives me an error message saying that the verification code is incorrect and then it kicks me out of the program!	asd dsa	##########			47	ar	us		1	ar	application open bad update mess even enter verification code give error message say verification code incorrect kick program	Negative	Google Play Store	1	1	0
Google Play Store	bc9fa122-bd6b-4f2c-8b9a-f470ac7798aa	Excellent and its services are diverse and fast.	Rabea SH	##########			0	ar	us		5	ar	excellent service diverse fast	Positive	Google Play Store	0	0	0
Google Play Store	fb712cff-c97a-4272-9a36-32b324171ace	Very good.	صالح ع	##########			0	ar	us		4	ar	good	Positive	Google Play Store	0	0	0
Google Play Store	b0c785f0-c3ac-4e57-ab48-c9a85e8383a2	Very bad, it suddenly exits the application.	Muhareb Hazzaa	##########			0	ar	us		1	ar	bad suddenly exit application	Negative	Google Play Store	1	1	0
Google Play Store	daa6c9f2-4774-49b7-8402-328b3d931bca	I receive a verification code but the application does not open even though the code is written correctly.	BOB	##########			0	ar	us		1	ar	receive verification code application open even though code write correctly	Negative	Google Play Store	0	1	0
Google Play Store	16c724e3-c39d-4795-b3d0-d1d59317816d	Great application, easy and fast 🥰😍👌👍	smo sam	##########			0	ar	us		5	ar	great application easy fast	Positive	Google Play Store	0	0	0
Google Play Store	46f2f675-2f76-4b4b-8e88-4d4a3cc8efc7	Your application is upset with me, it is not willing to open for me. It says your data is expired, so we went to renew the data and confirmed it, yet it still won't open the door for me. I don't know what else it wants. I will try again, and if it still doesn't work, I will look for another place that welcomes me. Customer: Iadvan	Abo Fahad	##########			0	ar	us		1	ar	application upset will open say data expire go renew data confirm yet still wont open door dont know else want try still doesnt work look another place welcome customer iadvan	Negative	Google Play Store	1	1	0
Google Play Store	be76465b-df91-48b3-a2f7-4c71465466f9	When I log in, the application closes immediately and I need to log in again for it to open with me. Please solve the problem before the latest update and change the name of the bank. The application was excellent and did not have any problems. Also, with the latest update, I can't see my Emirates miles or Skywards miles. Unfortunately, I have been facing this issue for 7 days and you did a new u…	محمد علي	##########			150	ar	us		2	ar	log application close immediately need log open please solve problem late update change name bank application excellent problems also late update cant see emirates miles skywards miles unfortunately face issue days new update problem resolve even contact get apology problem application	Negative	Google Play Store	0	1	0
Google Play Store	85f9f031-a7ed-4fff-9bac-1cb72c91ae30	The application is frozen or not responding.	abd allah Abu Jami	##########			0	ar	us		1	ar	application freeze respond	Negative	Google Play Store	0	0	1
Google Play Store	da7111fa-6ba2-4578-a9ed-d1917a0227e2	There is a malfunction in the application.	بندر المانع	##########			0	ar	us		5	ar	malfunction application	Negative	Google Play Store	0	1	0
Google Play Store	91d1aad1-df33-4ef6-9e6f-c076a0ef2168	Very bad application and raises blood pressure.	aa aaa	2023-06-05 06:58:00			0	ar	us		1	ar	bad application raise blood pressure	Negative	Google Play Store	1	0	0
Google Play Store	dc881ffd-dc91-497f-ab2a-5da10f6b743a	Hello, is there an application like STC Pay for the Saudi First Bank?	Faisal Bin Fahad	##########			0	ar	us		5	ar	hello application like stc pay saudi first bank	Neutral	Google Play Store	1	1	0
Google Play Store	1a07c6dd-c41a-4d02-9bf8-9d0c32965aa6	The application is excellent, easy, and clear.	سامي النشوان	##########			0	ar	us		5	ar	application excellent easy clear	Positive	Google Play Store	0	0	0
Google Play Store	7113f7d2-f374-4bc4-bd62-9a12b3e4b82f	Easy to use and useful.	ابو صالح	##########			0	ar	us		5	ar	easy use useful	Positive	Google Play Store	0	0	0
Google Play Store	2fa149b6-0139-405d-9aa4-e27d3858de1e	The application is not working today, Friday, outside of Saudi Arabia.	Talal El Nabrise	2023-06-02 02:34:00			0	ar	us		1	ar	application work today friday outside saudi arabia	Negative	Google Play Store	0	1	0
Google Play Store	f3c2aea9-0594-449c-aa95-55e9c7cd31a1	My phone broke down very badly, and I got it fixed at a mobile shop. I tried to recover my account on my phone, but there was no use. I contacted customer service, but it was not registered with a password. The automated response said that they had a technical malfunction, and to try again later. So, I have been trying to recover it on my phone for 4 days instead of going to the bank every time. …	نانو توتي	##########			0	ar	us		1	ar	phone break badly get fix mobile shop try recover account phone use contact customer service register password automate response say technical malfunction try late try recover phone days instead go bank every time system use amaze sorry say bad service ever experience customer sabb bank years service use excellent completely different	Negative	Google Play Store	1	1	0
Google Play Store	7a0b8b2c-5242-4f3b-be42-0a9c13a9f6d8	The fault has been fixed.	Hassan AL-Abdullah	##########			0	ar	us		5	ar	fault fix	Neutral	Google Play Store	0	1	0
Google Play Store	deb72773-2698-45d7-bfe0-16579d0a790e	Very good	Ahmad Ali	##########			0	ar	us		4	ar	good	Positive	Google Play Store	0	0	0
Google Play Store	cd784e4c-90ea-4e81-830d-8bebe874e080	Very bad. The account keeps getting banned constantly, and you find it difficult to recover the application's functionality again. It is a recurring problem.	yasser samir	##########			0	ar	us		1	ar	bad account keep get ban constantly find difficult recover applications functionality recur problem	Negative	Google Play Store	1	1	1
Google Play Store	1c4077d2-1ff4-4f3a-a1a3-bcfb736c2b46	If you finish using the application, a page will appear asking if you are satisfied with the service. If you click on this page, and then click on "open", it freezes and you cannot go back. I hope the problem can be resolved.	tif tifw	##########			9	ar	us		3	ar	finish use application page appear ask satisfy service click page click open freeze go back hope problem resolve	Negative	Google Play Store	0	0	1
Google Play Store	978736c7-f679-46ba-b2f1-5dcf638bee71	Excellent and easy to use, but after the new update, it started to freeze and asks to open the website.	SK	##########			0	ar	us		5	ar	excellent easy use new update start freeze ask open website	Negative	Google Play Store	0	0	1
Google Play Store	fea305d0-2dd8-4dd1-b07f-1addf31c7c92	If there were less than a star, I swear you don't deserve more than this. What a trashy program! The dirtiest program on Google Play. Improve yourselves or find someone who understands to fix this rotten program.	ابو قصي	##########			0	ar	us		1	ar	less star swear dont deserve trashy program dirty program google play improve find someone understand fix rotten program	Negative	Google Play Store	1	0	0
Google Play Store	365b541c-5f85-4e60-8df5-4f0f09e0a034	There are no services.	Nawaf	##########			0	ar	us		1	ar	service	Negative	Google Play Store	0	1	0
Google Play Store	981f3017-8df4-4360-8c2e-d41593f88837	The logout is immediately recorded once the password is entered.	محمد الحجي	##########			5	ar	us		1	ar	logout immediately record password enter	Neutral	Google Play Store	0	1	0
Google Play Store	171ce8d0-892e-4d7a-a6b0-0330ffd75f1a	The program needs an Android update. Logging into the application multiple times is not possible. Each time I try to log in, I have to delete the application and download it again to log in.	Abdullah ADO	##########			1	ar	us		1	ar	program need android update log application multiple time possible time try log delete application download log	Negative	Google Play Store	0	1	0
Google Play Store	8fb357d0-a367-478d-9315-8bbe9993d5ef	It doesn't open for me and I have to cancel my practical application because it has security. The only banking application that doesn't open for me for this reason.	مطلق الشمري	##########			0	ar	us		1	ar	doesnt open cancel practical application security bank application doesnt open reason	Negative	Google Play Store	0	1	0
Google Play Store	b6fc1b6a-65f2-421a-b014-f8df906f5d06	Thank you for listening to our feedback. Everything is working fine now.	Zuhair Abdulaziz	##########			21	ar	us		5	ar	thank listen feedback everything work fine	Positive	Google Play Store	0	0	0
Google Play Store	4cdca6ed-8fc4-4dbc-846d-a88c7c723400	I couldn't enter a very difficult program once.	احمد الحالدي	##########			0	ar	us		1	ar	couldnt enter difficult program	Negative	Google Play Store	1	0	0
Google Play Store	b2ebec21-f899-4963-84be-812c8c17db57	Excellent experience.	Abodi Doman	##########			0	ar	us		5	ar	excellent experience	Positive	Google Play Store	0	0	0
Google Play Store	7e5b8da7-8151-4240-a451-36b05a8cb478	The login is very bad.	Moad Sarhan	##########			0	ar	us		1	ar	login bad	Negative	Google Play Store	0	1	0
Google Play Store	bb33afc6-c925-4a7a-a7e6-5e8fa359acfe	Extreme slowness and logging out by itself, and she has to log in two or more times.	نجم نجم	##########			0	ar	us		1	ar	extreme slowness log log two time	Negative	Google Play Store	0	0	1
Google Play Store	ee562dba-ae19-4e67-a064-47d948560d90	The problem of continuous logouts has been fixed.	Elamin Shaikh	##########			1	ar	us		5	ar	problem continuous logouts fix	Neutral	Google Play Store	0	1	0
Google Play Store	3ecc5b50-5a52-4e17-84a1-38efac1ea9fe	We would be more than happy to help you download a program for accessing and capturing a photo.	khalid amorysweet	##########			0	ar	us		1	ar	would happy help download program access capture photo	Positive	Google Play Store	0	1	0
Google Play Store	46045bba-2a41-4655-93ee-d3822705560b	Excellent.	السيد طلعت محمدحسن	##########			0	ar	us		5	ar	excellent	Positive	Google Play Store	0	0	0
Google Play Store	b6c2eb46-9149-49e2-99a3-63e8a8714c54	Not satisfied	ابو اصيل	##########			0	ar	us		1	ar	satisfy	Negative	Google Play Store	0	0	0
Google Play Store	56768d0b-e464-4157-a340-4432bda83fa1	Excellent.	xxx bbb	##########			0	ar	us		5	ar	excellent	Positive	Google Play Store	0	0	0
Google Play Store	9fa25ff6-e2e7-4b34-ba9d-88ad4f575221	The only application that every time I enter it asks for an update, it's not reasonable. These updates every week, people! And the new update, every time I try to transfer an amount, the session ends. Oh, world! It has become the worst application compared to banking applications. Look for another entity that develops banking applications.	Sahal Arishi	##########			0	ar	us		1	ar	application every time enter ask update reasonable update every week people new update every time try transfer amount session end oh world become bad application compare bank applications look another entity develop bank applications	Negative	Google Play Store	1	1	0
Google Play Store	c35e6015-ebae-4f69-9e73-3535a8c8bfe8	Everything was fine until the last update. I had to log in twice. Why do you have a 4-star rating? Because it is really an easy application for me, but I subtract one star for the login repetition.	Red Gardenia	##########			1	ar	us		4	ar	everything fine last update log twice star rat really easy application subtract one star login repetition	Neutral	Google Play Store	1	0	0
Google Play Store	e8b8d0ec-0a51-4726-9a82-301a6e2706f0	Good, but unfortunately every time I log in, the application quits and I have to log in again, it's necessary twice and I don't know why.	amazing man at a bad time	##########			1	ar	us		5	ar	good unfortunately every time log application quit log necessary twice dont know	Negative	Google Play Store	1	0	0
Google Play Store	a8bb3b58-b192-43a5-9659-8ad49f215b12	Very slow.	Ammar Sy	##########			0	ar	us		1	ar	slow	Negative	Google Play Store	0	0	1
Google Play Store	391d183c-398f-41c6-82c3-871e1819afb8	What benefits does the application gain when I enable the location system? I simply want a service provided to me. Why do you want to know my location? Are there places where the application does not offer its services? I want to focus on developing the application to serve its customers.	GOLD MAESTRO	##########			13	ar	us		1	ar	benefit application gain enable location system simply want service provide want know location place application offer service want focus develop application serve customers	Neutral	Google Play Store	1	0	0
Google Play Store	da1de88b-4d0a-4ffa-9e6b-5ffe014cafaf	Very bad	albohti	##########			0	ar	us		1	ar	bad	Negative	Google Play Store	1	0	0
Google Play Store	8bf1c74c-872a-42d6-a05f-b02b10c7b11a	The update on May 14th solved the problem of registering twice! Finally.	MUSAAD MA	##########			1	ar	us		3	ar	update may th solve problem register twice finally	Positive	Google Play Store	0	1	0
Google Play Store	fa6d1497-0488-4742-96fb-2ce91950747d	Comment and harassment	MOHAMMED ALOTAIBI	##########			1	ar	us		1	ar	comment harassment	Negative	Google Play Store	1	0	0
Google Play Store	f6acd5af-a596-4038-a65d-c6f76023dafc	I need to enter again in order to use it. I hope my new A54 device works properly.	jeddah abod	##########			1	ar	us		2	ar	need enter order use hope new device work properly	Neutral	Google Play Store	0	1	0
Google Play Store	6c6e6422-38d1-4a2b-be6a-f61c8862a903	Good.	Seif Mariem	##########			0	ar	us		5	ar	good	Positive	Google Play Store	0	0	0
Google Play Store	844fa36a-805f-493d-bede-7ee0b10bdb6e	The latest update has many problems including sudden app shutdown, lack of responsiveness, and instability.	ali algallaf	##########			0	ar	us		1	ar	late update many problems include sudden app shutdown lack responsiveness instability	Negative	Google Play Store	1	1	1
Google Play Store	5140c837-1b82-46a7-a42e-b6c06292bcf9	The latest update is very bad; it logs in twice, meaning that after you enter, it kicks you out and makes you log in again each time you access the application.	khalil pyp	##########			1	ar	us		1	ar	late update bad log twice mean enter kick make log time access application	Negative	Google Play Store	1	1	0
Google Play Store	9e2773b6-9de6-43a7-bb40-27f32804882f	My first account which I opened is with Banki Al-Awwal.	بودانيال	##########			0	ar	us		5	ar	first account open banki alawwal	Neutral	Google Play Store	0	1	0
Google Play Store	3f34fa04-4467-4c74-89d8-b1241ab3e8eb	I am asked for the username and password, and the verification code is sent. After I enter the code, I am logged out of the application immediately, and when I try to sign in again, the same process is repeated, and I am logged out after entering the verification code. There is a problem now that was working fine before. Please pay attention to the program and solve the problem.	rose soso	##########			0	ar	us		1	ar	ask username password verification code send enter code log application immediately try sign process repeat log enter verification code problem work fine please pay attention program solve problem	Negative	Google Play Store	0	1	0
Google Play Store	857023b7-e491-46dc-b5d4-14cb4504949d	"Failure, every time logging out."	خالد مصلح	##########			0	ar	us		1	ar	failure every time log	Negative	Google Play Store	0	1	0
Google Play Store	4fc8fc62-1f3c-4dea-b81b-f5d96a173899	The application has become very slow and doesn't open.	JABR ADIL	##########			0	ar	us		1	ar	application become slow doesnt open	Negative	Google Play Store	0	1	1
Google Play Store	b27f80d4-a0ae-4ce3-8a4f-898ed793662e	After the latest update, it has become incredibly slow to the point that you start doubting the device itself. The problem seems to be with the software as it is slow in a very strange way. It makes me feel like I've gone back to the days of Nokia. Goodbye.	Taleb Alawadh	##########			0	ar	us		1	ar	late update become incredibly slow point start doubt device problem seem software slow strange way make feel like ive go back days nokia goodbye	Negative	Google Play Store	1	0	1
Google Play Store	9a47882e-098a-4af6-84bf-2e143554df61	Fail	Mr. King	##########			0	ar	us		1	ar	fail	Negative	Google Play Store	0	1	0
Google Play Store	60180e0c-719f-4c7c-8bfb-6c1a195f85b3	The updates slow down the application and make it laggy and log out.	Amin Alawadi	##########			0	ar	us		1	ar	update slow application make laggy log	Negative	Google Play Store	0	0	1
Google Play Store	5e80c54e-8f4e-4ab3-958d-7813403403eb	The latest update is very bad. You need to log in twice for it to work.	Hatem	##########			0	ar	us		1	ar	late update bad need log twice work	Negative	Google Play Store	1	1	0
Google Play Store	b3cf1310-1f1c-46d0-ad46-8f65232a7c3c	The latest update is rubbish. It enters the application and exits, and we have to sign in again. Unfortunately, I advise you to revert to the previous update because this one is completely broken.	Azzam Alfahd	##########			0	ar	us		1	ar	late update rubbish enter application exit sign unfortunately advise revert previous update one completely break	Negative	Google Play Store	0	1	0
Google Play Store	944d7fea-d65b-4b9a-a35d-525ee3bb8a2a	The latest update... If you enter for a few seconds and it kicks you out, and you try multiple times without success, in the end it will ban you.	مبدعي المحتوى	##########			0	ar	us		5	ar	late update enter second kick try multiple time without success end ban	Negative	Google Play Store	1	1	0
Google Play Store	15d6559f-9f51-46b6-adeb-75513ae4c9d9	Excellent, the problem was resolved after deleting and reinstalling the application again.	Faisal Eid	##########			0	ar	us		5	ar	excellent problem resolve delete reinstall application	Positive	Google Play Store	1	1	0
Google Play Store	9ff19674-b671-4a52-9337-379a4f65e9c1	Hello, please update the application.	أبو احمد	##########			0	ar	us		1	ar	hello please update application	Neutral	Google Play Store	0	1	0
Google Play Store	8db9a8b5-7895-483d-83c0-5bca9559c7f0	Find a solution for this failed update.	Sp Sp	##########			0	ar	us		1	ar	find solution fail update	Negative	Google Play Store	0	1	0
Google Play Store	f1933b46-b248-4ba3-8c9d-00d617efd60b	The application is bad and requires multiple logins.	husaain abusamar	##########			0	ar	us		1	ar	application bad require multiple logins	Negative	Google Play Store	1	1	0
Google Play Store	0db2424c-82af-414e-ae18-5f90e5129680	It has been bad for me since the last update. The first activation has caused me a problem of page locking and returning to the system from the beginning. I filed a complaint on May 7th.	الورد لغتي	##########			0	ar	us		5	ar	bad since last update first activation cause problem page lock return system begin file complaint may th	Negative	Google Play Store	1	1	0
Google Play Store	981bda9d-498a-4c14-92ca-aebc3d7a6892	The application has become very annoying to the user after the recent updates, as it forces you to log out and you have to log in again at least twice or sometimes more.	H T	##########			1	ar	us		1	ar	application become annoy user recent update force log log least twice sometimes	Negative	Google Play Store	1	1	0
Google Play Store	eee75ea6-9407-44a6-ab2c-d4380b8cb996	The registration is not accepted, and if I enter the username and password, it rejects the login. Please help solve the problem.	Samy Omar	2023-05-09 05:46:00			0	ar	us		1	ar	registration accept enter username password reject login please help solve problem	Negative	Google Play Store	0	1	0
Google Play Store	109b1a40-9646-44fd-a58a-05d379a6797b	Awful, awful, awful. He refuses to enter your account. Give him a two-day deadline to solve the problem. If the issue is not resolved, the funds will be transferred to another bank that does not deserve ten stars for this update.	Ibrah34 Ihh	##########			0	ar	us		1	ar	awful awful awful refuse enter account give twoday deadline solve problem issue resolve fund transfer another bank deserve ten star update	Negative	Google Play Store	1	1	0
Google Play Store	29b068b3-b111-4889-a8d9-0e29381dc3b9	The latest update is very bad.	Ismail Alashry	##########			0	ar	us		1	ar	late update bad	Negative	Google Play Store	1	0	0
Google Play Store	2f4c6797-f0b8-466d-942b-7a59082120cc	An application from bad to worse, I don't know if they have specialists in this field or if they just rush and imitate blindly others.	محمد عساف	##########			0	ar	us		1	ar	application bad bad dont know specialists field rush imitate blindly others	Negative	Google Play Store	1	0	1
Google Play Store	155eeba2-3b26-48b2-82c4-ec1e12423da1	There is a problem where after logging in, it automatically logs out and asks to enter the password again, and a new code is sent.	Ali Alqarni	##########			0	ar	us		5	ar	problem log automatically log ask enter password new code send	Negative	Google Play Store	0	1	0
Google Play Store	0b6a441d-4503-41c3-873f-6cf9f039141b	Unfortunately, the application failed. The version that I downloaded is the first version of the application, and I have been using it. However, with this update or version, I haven't seen any improvement. You have to exit and re-enter for it to work again.	Hussain Al Hassan	2023-05-08 08:19:00			0	ar	us		1	ar	unfortunately application fail version download first version application use however update version havent see improvement exit reenter work	Negative	Google Play Store	0	1	0
Google Play Store	d38e26f6-6c4a-408f-8e3d-ca1bcc570eed	The latest update is bad. When I log in for the first time, it exits immediately and I have to log in to the application again for it to open.	Abu Saud	2023-05-08 08:10:00			0	ar	us		1	ar	late update bad log first time exit immediately log application open	Negative	Google Play Store	1	1	0
Google Play Store	2f055843-d03c-4bd4-80fe-31b69aecea48	The latest update is a failure. Every time I login, the application closes by itself and it keeps happening multiple times.	Rafia Rafia	2023-05-08 07:31:00			0	ar	us		1	ar	late update failure every time login application close keep happen multiple time	Negative	Google Play Store	0	1	0
Google Play Store	126ef1db-35e5-40cd-bbcd-b319668abde5	The latest update is very bad.	Hassan Alsaeed	2023-05-08 06:35:00			0	ar	us		1	ar	late update bad	Negative	Google Play Store	1	0	0
Google Play Store	63afde2b-7cc1-4560-8a15-23aefa2e30d8	The application "CJADH" is always hanging and you won't benefit from it. Its system is different from all other banks.	خالد الحميدي	2023-05-08 04:35:00			0	ar	us		1	ar	application cjadh always hang wont benefit system different bank	Negative	Google Play Store	1	1	1
Google Play Store	47f8bda5-b7ea-46ee-98dd-59ea8f7f5665	The application does not work after the update and a message appears, "Check the network connection" even though the mobile is connected to the internet.	Mohamed Torky	##########			0	ar	us		1	ar	application work update message appear check network connection even though mobile connect internet	Negative	Google Play Store	0	1	0
Google Play Store	8752fd88-e5cd-4c91-8e2e-cfefd8c163df	Very, very bad, extremely bad.	Alaa Rasheedy	##########			0	ar	us		1	ar	bad extremely bad	Negative	Google Play Store	1	0	0
Google Play Store	efc9e639-783f-4fc0-aa2f-f7daa2b985a4	After the update, it became slow and it didn't work the first time. I have to exit and re-enter very slowly. May God take revenge on it, it's just a waste of time, a worthless application.	osama osman	##########			0	ar	us		1	ar	update become slow didnt work first time exit reenter slowly may god take revenge waste time worthless application	Negative	Google Play Store	1	1	1
Google Play Store	0b79401d-f6d1-4c50-a810-930df9252413	A very bad application that doesn't open and takes a long time to send the code. Then it opens and closes the page, and when I try to open it again, it opens with difficulty.	Abdullelah	##########			0	ar	us		1	ar	bad application doesnt open take long time send code open close page try open open difficulty	Negative	Google Play Store	1	1	1
Google Play Store	181dc1c2-32cf-499a-bb56-fd03691b85e9	The application is very bad and if the situation remains the same, I will cancel my account with this bank.	Sameh Maali	##########			0	ar	us		1	ar	application bad situation remain cancel account bank	Negative	Google Play Store	1	1	0
Google Play Store	9d52f858-dc77-4db7-bec5-de78f78fffeb	The latest update is very bad. You have to enter twice and it's slow.	mohmmad jaber	##########			0	ar	us		1	ar	late update bad enter twice slow	Negative	Google Play Store	1	0	1
Google Play Store	00a16bbe-3639-471f-84da-f044f77f4475	the worst application with bad updates, it enters the verification code multiple times and does not open the application. And if the application opens after a few seconds, it kicks you out of the application because the session has ended. 👎	باسم بسام	##########			0	ar	us		1	ar	bad application bad update enter verification code multiple time open application application open second kick application session end	Negative	Google Play Store	1	1	0
Google Play Store	f969177c-060c-496c-9cc8-49daad825e17	The latest update is very bad.	Hussain Al manassif	##########			0	ar	us		1	ar	late update bad	Negative	Google Play Store	1	0	0
Google Play Store	da4444ec-497b-4fd9-b600-41e2ef6e6121	The latest update is causing the application to frequently freeze and crash.	aman alaman	##########			1	ar	us		1	ar	late update cause application frequently freeze crash	Negative	Google Play Store	0	1	1
Google Play Store	737bd56e-eb32-4f82-8be1-1b6971c995a4	After the update, it is very bad.	ali aljabarh	##########			0	ar	us		1	ar	update bad	Negative	Google Play Store	1	0	0
Google Play Store	a7222597-8166-4675-9394-2815bfa21f88	Very bad, where you login more than once and cannot activate the account number from the beneficiaries list.	A AZIZ	##########			0	ar	us		1	ar	bad login activate account number beneficiaries list	Negative	Google Play Store	1	1	0
Google Play Store	4bef0c0a-7631-44f7-bb8b-9d7fbb1e050c	"This is the worst application, full of vulnerabilities. I hope you take notice and resolve the issues in the Arabic version."	Mohammed Alsuabeyl	##########			2	ar	us		1	ar	bad application full vulnerabilities hope take notice resolve issue arabic version	Negative	Google Play Store	1	1	0
Google Play Store	e29380a2-87cf-4d31-9bc8-769067476e23	Not working properly.	USAMAH AL-AHAMED	##########			0	ar	us		1	ar	work properly	Negative	Google Play Store	0	1	0
Google Play Store	c08c2df1-005d-4283-8915-c3db810f41c1	The application is generally excellent, but there is a note: when entering the application, I am redirected back to re-enter login information, meaning I cannot access the account until I try opening the application twice. Thank you.	ابوعبدالاله الهاشمي	2023-05-06 08:36:00			6	ar	us		3	ar	application generally excellent note enter application redirect back reenter login information mean access account try open application twice thank	Positive	Google Play Store	0	1	0
Google Play Store	ce8aa41f-e4dd-466f-a7ea-b2e12d7d04a9	The application is not working!	اللهم صل على محمد	##########			0	ar	us		1	ar	application work	Negative	Google Play Store	0	1	0
Google Play Store	05215fcf-686a-4199-a803-ba88e872e64c	The latest update is bad.	Abdul Majeed Al Abdul Jabbar	##########			0	ar	us		1	ar	late update bad	Negative	Google Play Store	1	0	0
Google Play Store	f4c41dc9-a510-41c9-b970-6c632657e170	There is a problem with the latest update, after logging in, the system automatically logs out, which forces us to log in again, which disrupts and hinders our work. Additionally, the verification code arrival time is not sufficient, so we request an extension.	حمد الحربي	##########			2	ar	us		4	ar	problem late update log system automatically log force us log disrupt hind work additionally verification code arrival time sufficient request extension	Negative	Google Play Store	0	1	0
Google Play Store	22f964db-98cb-44af-b7fb-fb527db8e2bf	The latest update is very bad, the code is slow and every time you enter the code, it exits and asks for registration for the second time and gets stuck. I have decided to switch to another bank.	iUMRZ	##########			0	ar	us		1	ar	late update bad code slow every time enter code exit ask registration second time get stick decide switch another bank	Negative	Google Play Store	1	0	1
Google Play Store	7a07a981-f1fc-484e-aee0-3badadd5bbed	After the latest update, we have to log in twice. The first time, it kicks you out, which is very annoying.	Mbr J3idi	##########			14	ar	us		1	ar	late update log twice first time kick annoy	Negative	Google Play Store	1	0	0
Google Play Store	48a6513e-1339-48ab-9bcc-fc138e87440e	The application is slow to log in and every time I enter information, it gets cleared. We hope the problem can be solved as soon as possible.	فهد اليماني	##########			0	ar	us		2	ar	application slow log every time enter information get clear hope problem solve soon possible	Negative	Google Play Store	0	0	1
Google Play Store	828dc8f7-e92a-4ee5-a4b8-cc100df743a4	The latest update is bad and it comes out immediately after logging in. Then I have to log in again and every time there is an update, but nothing really changes or improves.	Rody King	2023-05-04 09:35:00			0	ar	us		3	ar	late update bad come immediately log log every time update nothing really change improve	Negative	Google Play Store	1	0	0
Google Play Store	2693329c-267a-40c3-b218-fe597ed3487d	The application is not working.	سومه سومه	##########			0	ar	us		1	ar	application work	Negative	Google Play Store	0	1	0
Google Play Store	04af1892-57fc-404c-a588-0ea85c5594b7	The application is terrible.	ft a	##########			0	ar	us		1	ar	application terrible	Negative	Google Play Store	1	0	0
Google Play Store	fe4da6fe-cfec-4711-8a8d-56de824c9ac7	Good experience with the available services. However, there is a problem when logging into the account where you get logged out and have to log in again to access the account.	Abodi Ksa	##########			1	ar	us		2	ar	good experience available service however problem log account get log log access account	Neutral	Google Play Store	1	1	0
Google Play Store	a1352393-39b2-4ddf-a6b8-1e6e60ba5850	It doesn't open in Arabic, it only opens in English. If I set it to Arabic, it will exit the program.	عبدالله الفضلي	2023-05-03 09:08:00			0	ar	us		1	ar	doesnt open arabic open english set arabic exit program	Neutral	Google Play Store	0	1	0
Google Play Store	e5d1aa96-3ad8-49dc-9766-b85ed7200385	The application is bad, you have to login twice. The first time you exit the application automatically.	yasser Alzahrani	2023-05-03 06:19:00			1	ar	us		1	ar	application bad login twice first time exit application automatically	Negative	Google Play Store	1	1	0
Google Play Store	11df0cbf-885e-4349-be09-3cfc5815cc0c	The update is very bad... It doesn't open on the first try and you have to login twice.	Ayman Mohamed Elamain	##########			0	ar	us		1	ar	update bad doesnt open first try login twice	Negative	Google Play Store	1	1	0
Google Play Store	a006647c-62fa-4374-9480-3c472b338d5b	The latest update is very bad, every time we have to log in twice. Please work on fixing the problem.	big boss	##########			7	ar	us		1	ar	late update bad every time log twice please work fix problem	Negative	Google Play Store	1	1	0
Google Play Store	106adaa6-10e5-4dad-84d1-afc25a483ff9	The application was very excellent and high-performance, but after the latest update, there has been difficulty in logging in, as I need to log in twice to use the application.	Kareem mohammed	##########			0	ar	us		2	ar	application excellent highperformance late update difficulty log need log twice use application	Negative	Google Play Store	1	0	0
Google Play Store	c4faedff-e036-4242-9ee6-e4b735098f3c	After the update, it requires logging in four times until you can actually enter, and there is a technical glitch that needs to be fixed as soon as possible. Best wishes for success and luck.	ammar alnadi	##########			4	ar	us		2	ar	update require log four time actually enter technical glitch need fix soon possible best wish success luck	Neutral	Google Play Store	0	1	0
Google Play Store	602b806d-2358-4abe-ae84-86f0d61785dc	You have to enter twice, what does not enter you from the first time???	gσld нєαят	##########			1	ar	us		3	ar	enter twice enter first time	Neutral	Google Play Store	0	1	0
Google Play Store	8cad36ad-53b3-4d93-9820-a78eba31fac6	Unfortunately, after the latest update, if I choose the Arabic language in the application, it logs me out when I try to login, forcing me to login again. This might happen multiple times before it stabilizes. I reported the issue but it has not been resolved yet.	Hussain AboAli	2023-05-02 09:37:00			56	ar	us		1	ar	unfortunately late update choose arabic language application log try login force login might happen multiple time stabilize report issue resolve yet	Negative	Google Play Store	0	1	0
Google Play Store	536ddc0c-0da2-40fb-b168-f4dd624e682e	Very very bad with the new update, when I log in, it kicks me out of the application??? I have filed a complaint to the bank multiple times and they close it without resolving the issue.	Mm K	2023-05-02 09:13:00			1	ar	us		1	ar	bad new update log kick application file complaint bank multiple time close without resolve issue	Negative	Google Play Store	1	1	0
Google Play Store	1fffb175-e585-4896-8226-648cf7dabeed	"The application has become very bad after the update. Please solve the problem. Previously, it was excellent, and now it does not enter the account and keeps logging out frequently. What is this?"	علي علاوي	2023-05-02 06:33:00			0	ar	us		1	ar	application become bad update please solve problem previously excellent enter account keep log frequently	Negative	Google Play Store	1	1	0
Google Play Store	7da31d6f-7d8f-4912-9314-b6dd12584d14	After changing the bank's name and the new update, the program is very bad. Every time I log in, I get kicked out and it asks me to log in again.	مهند الشيخ	2023-05-02 03:20:00			0	ar	us		1	ar	change bank name new update program bad every time log get kick ask log	Negative	Google Play Store	1	0	0
Google Play Store	b9f69a81-ffe0-4837-881c-f65ab25d01e5	It now asks you to log in twice.	A	2023-05-02 00:14:00			0	ar	us		1	ar	ask log twice	Neutral	Google Play Store	0	1	0
Google Play Store	8f1f7258-497a-47a0-b317-d0ae66d814e3	The modification is a failure. After it became the first name, it moved to the worst application. Every time you enter, it kicks you out. If I could give my opinion without a star, I wouldn't even give it a star...	أبو ماهر	##########			0	ar	us		1	ar	modification failure become first name move bad application every time enter kick could give opinion without star wouldnt even give star	Negative	Google Play Store	1	1	0
Google Play Store	001cac8f-440a-4365-9ad4-bfa37d5dc3d6	A very very very bad program.	محسن الكينج	##########			0	ar	us		1	ar	bad program	Negative	Google Play Store	1	0	0
Google Play Store	e8670545-0d2c-4bfd-ac37-257b0601743e	Very bad, it disconnects every now and then.	sand dune	##########			0	ar	us		1	ar	bad disconnect every	Negative	Google Play Store	1	0	0
Google Play Store	42839e97-3762-47d6-b372-756ff8fcc9fc	Login and device registration problems and it has become very slow.	زايد محمد	##########			0	ar	us		1	ar	login device registration problems become slow	Negative	Google Play Store	0	0	1
Google Play Store	9128028c-5bd1-4601-b308-2d7812158366	I have a problem when I log into my current account after verification for the first time. It fails and I have to start over again.	Sub Main	##########			0	ar	us		5	ar	problem log current account verification first time fail start	Negative	Google Play Store	0	1	0
Google Play Store	8c7eaea4-4b51-426c-9792-d26301cd6460	The application requires you to log in twice.	malik almarhoon	##########			0	ar	us		1	ar	application require log twice	Neutral	Google Play Store	1	1	0
Google Play Store	2f5f1fe4-4dc2-4bf2-8388-3b76dc072cc7	Every time I try to log in, it kicks me out.	Khalifah Alkhalfan	2023-05-01 09:16:00			0	ar	us		1	ar	every time try log kick	Negative	Google Play Store	0	1	0
Google Play Store	4b98d34a-945a-4f01-9ec7-da5008572645	The program is bad and certainly reflects the work of the bank and its employees. The problem is that when you call and try to communicate these issues, they don't listen or the person who answers is not understanding. Even when addressing them through email, there is no response. Before starting a new project or developing it, human resources in it must be improved.	YOUSEF ALSALEM	2023-05-01 08:15:00			0	ar	us		1	ar	program bad certainly reflect work bank employees problem call try communicate issue dont listen person answer understand even address email response start new project develop human resources must improve	Negative	Google Play Store	1	1	0
Google Play Store	e8c04c43-8003-4c49-8e7d-5e6d0b555bf9	The latest update is very bad. After logging in, it kicks you out of the application and asks you to log in again.	albalawi khaled	2023-05-01 07:45:00			0	ar	us		1	ar	late update bad log kick application ask log	Negative	Google Play Store	1	1	0
Google Play Store	0fb865cd-af00-49df-94e6-b198a74517b1	Very wonderful	نبيل الحجوري	2023-05-01 04:33:00			0	ar	us		5	ar	wonderful	Positive	Google Play Store	0	0	0
Google Play Store	d1c4137b-89a9-481c-ba2e-94c0cad67700	Every update is worse than the one before it. This program is the worst program in banks. Every time I try to log in, as soon as I enter the sender's number on my mobile, it opens and closes immediately. It takes about 3 or 4 tries to get in. Today, it doesn't accept entry at all, it's the worstand useless program.	marexman Maher	2023-05-01 00:37:00			5	ar	us		1	ar	every update bad one program bad program bank every time try log soon enter senders number mobile open close immediately take try get today doesnt accept entry worstand useless program	Negative	Google Play Store	1	1	0
Google Play Store	a6b38906-ad00-4d08-8474-e48b67a075b2	The latest update is very bad. It asks me to update the information and then it doesn't work. It exits the application and every time I enter the application, I have to enter the password twice. The application is supposed to improve and get better after the integration between SAP and the first one. Frankly, it has become bad.	ماهر سكيك	##########			0	ar	us		1	ar	late update bad ask update information doesnt work exit application every time enter application enter password twice application suppose improve get good integration sap first one frankly become bad	Negative	Google Play Store	1	1	0
Google Play Store	44a7d0ff-fb7f-4f0d-a743-0552dc4db41d	The website and application went from bad to worse, it's nothing like a global bank! It's embarrassing with all the errors and application problems.	A F	##########			0	ar	us		1	ar	website application go bad bad nothing like global bank embarrass errors application problems	Negative	Google Play Store	1	1	0
Google Play Store	f504bd52-b6e7-4f8c-ab1a-1a372bce43b0	After the update, every time I have to clear the data for the application to work properly. 🤥	mohammad AL-Enteef	##########			1	ar	us		1	ar	update every time clear data application work properly	Negative	Google Play Store	0	1	0
Google Play Store	66ef1110-4b70-4eda-b1d4-33b48de44c83	the worst application that freezes and does a reset after entering the verification code.	Faris Alofani	##########			0	ar	us		1	ar	bad application freeze reset enter verification code	Negative	Google Play Store	1	1	1
Google Play Store	8dd4d1c8-5587-4137-86cb-4028f5e30b9a	Unfortunately, the latest update is bad as it requires multiple login attempts in order to access the application.	mohammed Bedawi	##########			0	ar	us		2	ar	unfortunately late update bad require multiple login attempt order access application	Negative	Google Play Store	1	1	0
Google Play Store	73018fd3-ea5e-46da-a8e8-a3f8041ff336	Very beautiful, it would be great if we could update the profile from the application itself.	صلاح الشهاري	##########			0	ar	us		5	ar	beautiful would great could update profile application	Positive	Google Play Store	1	1	0
Google Play Store	bccc8e8c-a72d-4495-a59a-b484edd5ba5f	Very bad, I always experience issues with logging in. Either it's slow, freezing, or it doesn't even send a verification code. And this problem keeps happening, especially when I install the updates regularly!!👎👎	Om Haitham D	##########			0	ar	us		1	ar	bad always experience issue log either slow freeze doesnt even send verification code problem keep happen especially install update regularly	Negative	Google Play Store	1	1	1
Google Play Store	40a98b77-6edc-47b5-8182-28ee8cf1079f	A stupid app that requires logging in twice every time, not just for me but for multiple users in the family. It deserves a lot of criticism.	Faisal Mo	##########			0	ar	us		1	ar	stupid app require log twice every time multiple users family deserve lot criticism	Negative	Google Play Store	1	1	0
Google Play Store	b2daf774-c89c-40eb-a025-57f26dcc4912	The latest update is tiring and it takes a long time to log in, sometimes I have to try three times to enter the application. Please fix the problem! The previous update was good, every time I log in, I hope there is a new update for the problem, but unfortunately it hasn't been fixed yet.	abood Harhara	##########			13	ar	us		1	ar	late update tire take long time log sometimes try three time enter application please fix problem previous update good every time log hope new update problem unfortunately hasnt fix yet	Negative	Google Play Store	0	0	1
Google Play Store	2e6232d8-0da9-4ad9-a752-c36d5820a5f6	Every time I log in, it logs me out again and I have to log in again.	mostafa eazat	##########			0	ar	us		1	ar	every time log log log	Negative	Google Play Store	1	0	0
Google Play Store	77acac27-0a19-4609-afa1-b3c363501e4d	Very bad update.	اشراقة الفجر albharna	##########			0	ar	us		1	ar	bad update	Negative	Google Play Store	1	0	0
Google Play Store	39bb9866-4ee6-4db9-b5be-41217de0de88	The application, after the update, immediately exits upon login.	سعيد الزهراني	##########			0	ar	us		1	ar	application update immediately exit upon login	Neutral	Google Play Store	0	1	0
Google Play Store	17c33822-8de6-4f0b-aa26-7b53cbefec78	When entering the application, it automatically logs out after authentication and asks for re-entry every time, as there is a dual login requirement for access.	MAS	##########			0	ar	us		2	ar	enter application automatically log authentication ask reentry every time dual login requirement access	Neutral	Google Play Store	0	1	0
Google Play Store	503b7c38-df86-4e9a-bc64-6f259337f6ed	The latest update is a failure...every time I log in, it logs me out again and I have to log in again, and the same thing happens repeatedly.	احمد العسيري (ابو دانه)	##########			0	ar	us		1	ar	late update failureevery time log log log thing happen repeatedly	Negative	Google Play Store	0	1	0
Google Play Store	a6592361-bd94-464d-a245-dfea763f619b	Tired, but it gives you security. Thank you.	Abdulkarim Bakhraisah	##########			0	ar	us		4	ar	tire give security thank	Positive	Google Play Store	1	0	0
Google Play Store	1e6e652a-d203-47b2-b45f-08a66a6ea8b0	The application has become very bad.	abdelrhman fouad	##########			0	ar	us		1	ar	application become bad	Negative	Google Play Store	1	0	0
Google Play Store	a0f242fc-e067-460d-ad39-7ff2053ea723	The application is very bad, it does not open even if I register twice.	Loae Safi	##########			0	ar	us		1	ar	application bad open even register twice	Negative	Google Play Store	1	1	0
Google Play Store	d637f0e0-d558-4150-a765-2556286ec93f	The application has not been working for a week. Please resolve the issue.	عبدالرحمن عسيري	##########			0	ar	us		1	ar	application work week please resolve issue	Negative	Google Play Store	0	1	0
Google Play Store	cfc7ab53-a3f8-47a4-95ee-6f02831c8324	The bank and the application are very bad. I cannot log in on the first attempt, and there is also slowness and freezing. Despite the feedback provided by customers, the application's problems are ongoing and varied. Overall, the bank is regressing and not progressing.	Abdulrahman Sulaiman	##########			4	ar	us		1	ar	bank application bad log first attempt also slowness freeze despite feedback provide customers applications problems ongoing vary overall bank regress progress	Negative	Google Play Store	1	1	1
Google Play Store	d0e1fc01-c622-4983-95c1-1c1ddfdc3f5a	The latest update is very bad.	abid aljahdali	##########			0	ar	us		1	ar	late update bad	Negative	Google Play Store	1	0	0
Google Play Store	8440babe-783f-4fb6-a2e4-7a798a92d352	The new update is very bad. After signing up, the application crashes and you have to sign up again.	عبدالغني الشبعان	##########			0	ar	us		1	ar	new update bad sign application crash sign	Negative	Google Play Store	1	1	0
Google Play Store	f884d92a-11ad-4e74-a16e-a53b69fc5705	Wonderful	WaiL AL-SHAREIF	##########			0	ar	us		5	ar	wonderful	Positive	Google Play Store	0	0	0
Google Play Store	774a0cbf-6160-4b00-93ef-6ad1ca2c46b5	The application hangs and kicks you out of the program.	حسن الحربي	##########			0	ar	us		2	ar	application hang kick program	Negative	Google Play Store	0	0	1
Google Play Store	5ecaf24b-e9b0-4a01-b840-7d8a319bc6ae	Bad program, bad services, and bad customer service. It doesn't deserve even a quarter of a star.	العرابي الحارثي	##########			0	ar	us		1	ar	bad program bad service bad customer service doesnt deserve even quarter star	Negative	Google Play Store	1	0	0
Google Play Store	49609259-773b-4cbd-9aae-c058f884053b	Bad application .. especially after the new update, it immediately stops upon entry. It needs to be entered again ... improve this application more ... see how to solve this bad application .. it keeps happening every time.	‪Moh Al-Hudaibi (AK)‬‏	##########			4	ar	us		1	ar	bad application especially new update immediately stop upon entry need enter improve application see solve bad application keep happen every time	Negative	Google Play Store	1	1	0
Google Play Store	1c7a92e7-2461-47d2-8051-58a4d30f38f8	After the latest update, the application will not open.	Fahd Muhammed	##########			0	ar	us		1	ar	late update application open	Negative	Google Play Store	0	1	0
Google Play Store	a1ea9be8-6399-4870-a5ac-a3d3511f810c	The application has become unbearable... I am considering leaving the bank... All banks are evolving and yet SAP remains the same.	abu nawaf	##########			0	ar	us		1	ar	application become unbearable consider leave bank bank evolve yet sap remain	Negative	Google Play Store	1	0	0
Google Play Store	60ebcca3-e103-4ad7-9e8d-12f4ec46d937	Bad	Abu alwleed	##########			0	ar	us		1	ar	bad	Neutral	Google Play Store	1	0	0
Google Play Store	008e64a2-9ad1-4bc2-9850-276ff8f8f069	The application crashes a lot after the update, it keeps exiting when I enter it again. Please fix the problem.	امير غبور	##########			0	ar	us		1	ar	application crash lot update keep exit enter please fix problem	Negative	Google Play Store	0	1	0
Google Play Store	ac6fe071-df22-49da-bf7e-1f8bfd4b4f8a	The application is very bad now... It does not open when I log in, even though I receive a text message confirming that my login was successful on the application.. Please act quickly to solve this problem.	ALMOUIZ HAFIZ	##########			0	ar	us		5	ar	application bad open log even though receive text message confirm login successful application please act quickly solve problem	Negative	Google Play Store	1	1	0
Google Play Store	ab1cb17c-7fa1-4071-9c79-c337bbef8d0d	The application has many problems after its first name change: 1. You have to enter login information twice (username, password, and verification message) at least. 2. The application suddenly crashes without giving you a minute to use it. 3. It is slow and commands are delayed. 4. The number of invoice cases does not decrease, it remains stuck at number 2. 5. Delay in depositing the salary regar…	Moaath Fahad	##########			25	ar	us		1	ar	application many problems first name change enter login information twice username password verification message least application suddenly crash without give minute use slow command delay number invoice case decrease remain stick number delay deposit salary regardless employment sector whether government private technical support twitter respond automate reply	Negative	Google Play Store	0	1	1
Google Play Store	2d6b5b86-30df-443e-94e9-997c67a23482	The latest update is not good (every time I try to open the application, it exits). Please solve the problem.	Tariq Al Kathiri	##########			7	ar	us		1	ar	late update good every time try open application exit please solve problem	Negative	Google Play Store	0	1	0
Google Play Store	d5cd1605-0c03-48ec-b122-12c80c05ccd4	I have several banking applications. There is nothing worse than this application. It is heavy and constantly freezes.	Ramzi	##########			0	ar	us		1	ar	several bank applications nothing bad application heavy constantly freeze	Negative	Google Play Store	1	0	1
Google Play Store	772e837a-e7b6-4c61-87b7-74556eb299c4	The program needs maintenance, otherwise I cannot log in. Every login attempt exits.	Emad Elfaky	##########			0	ar	us		2	ar	program need maintenance otherwise log every login attempt exit	Negative	Google Play Store	0	1	0
Google Play Store	f9a8bfe8-99f1-40a4-9f9d-6334f917a220	The latest update with the new name has made the application slower. The authentication code is delayed and arrives after the deadline (please extend the time a little). After entering the program, it automatically logs out and asks for password input again to log in. Additionally, it closes when selecting any action. Therefore, it has become useless.	Mohammad Yamani ابوزياد	##########			111	ar	us		1	ar	late update new name make application slow authentication code delay arrive deadline please extend time little enter program automatically log ask password input log additionally close select action therefore become useless	Negative	Google Play Store	1	1	1
Google Play Store	834b0316-ca7b-48f9-95ed-8935d5258554	You need to fix the login issues for the application and find solutions for the continuous hanging and extreme slowness in using the application. Please pay attention to the bank's customer service or we will close the account and switch to other banks if the situation continues like this.	سبحان الله العظيم	##########			12	ar	us		1	ar	need fix login issue application find solutions continuous hang extreme slowness use application please pay attention bank customer service close account switch bank situation continue like	Negative	Google Play Store	0	0	1
Google Play Store	3c087844-bda6-4298-a016-618309ffc122	The latest update is very bad. You need to register twice for the application to open.	fahad alshareef	##########			0	ar	us		2	ar	late update bad need register twice application open	Negative	Google Play Store	1	1	0
Google Play Store	315c9abf-5688-40b4-a3cd-410d4e046168	The program is bad and difficult to use. It cannot display details of the current financing to know the remaining amounts paid and due.	Jaber Solimani	##########			0	ar	us		1	ar	program bad difficult use display detail current finance know remain amount pay due	Negative	Google Play Store	1	1	0
Google Play Store	6bc95d92-702d-46f1-bdda-5431cd2146ff	After the latest update, it became worse.	Amin Amouri	##########			0	ar	us		1	ar	late update become bad	Negative	Google Play Store	1	0	0
Google Play Store	8ef5de64-5441-4270-bedf-35e6a45dd193	It does not open on the first attempt, you must repeat the attempt several times.	khaled almajed	##########			2	ar	us		1	ar	open first attempt must repeat attempt several time	Negative	Google Play Store	0	1	0
Google Play Store	244e7922-a8a6-45c1-956e-378f9aa59342	For those who still don't get the app working after the update, they should delete the app and reinstall it again. Hopefully, it will work for them, God willing.	abo sadeem	##########			0	ar	us		4	ar	still dont get app work update delete app reinstall hopefully work god will	Neutral	Google Play Store	0	1	0
Google Play Store	7554852b-418f-4942-b625-05a1a48fa61a	A bad bank from the start to the end, even their application is worse than all the banks in the world. Small institutions have better applications than this. I am surprised by those who rely on it as their main bank.	ahmed akh	##########			0	ar	us		1	ar	bad bank start end even application bad bank world small institutions good applications surprise rely main bank	Negative	Google Play Store	1	0	0
Google Play Store	94a3b4e3-5a21-4dc1-8daf-0766c77b9bf1	From bad to worse, now it doesn't even open on mobile data, only on Wi-Fi, and it also keeps crashing on us.	Khalid Eid Darwish	##########			0	ar	us		1	ar	bad bad doesnt even open mobile data wifi also keep crash us	Negative	Google Play Store	1	1	1
Google Play Store	7834247d-0a11-475a-9071-6ee284acd6e2	The application is bad after the update.	Was	##########			0	ar	us		1	ar	application bad update	Negative	Google Play Store	1	0	0
Google Play Store	93a20401-b068-4359-9c65-deb1524a3c62	There is a problem with the application.	Sattam Alotaibi	##########			0	ar	us		1	ar	problem application	Negative	Google Play Store	0	1	0
Google Play Store	1a509be5-f0b9-4ad8-90bb-46bd466fd780	I wish it had not been updated.	Mr GTA _ KSA	##########			0	ar	us		1	ar	wish update	Negative	Google Play Store	1	0	0
Google Play Store	211dab5e-c430-450a-afff-c427583b05b0	After the latest update, the program has become bad.	mo fi	##########			0	ar	us		1	ar	late update program become bad	Negative	Google Play Store	1	0	0
Google Play Store	c949b702-8e22-40d2-b37f-46b158a429da	The application is bad. It does not open the electronic account registration because of a technical issue with the camera.	ahmed a3k	##########			0	ar	us		1	ar	application bad open electronic account registration technical issue camera	Negative	Google Play Store	1	1	0
Google Play Store	b669e300-cd01-47b2-8b14-f40c424bc4f0	The new update after the merge is very bad!!! It is not worth trying.	mans alomari	##########			0	ar	us		1	ar	new update merge bad worth try	Negative	Google Play Store	1	0	0
Google Play Store	d7159c35-40cf-4e5a-b8eb-8221add0db6f	The application, when I register, logs me out without any reason. Please solve this problem. The previous update was excellent, and I hope for a solution to this problem. Thank you, or else you will lose a large number of customers.	العنزي احمد	##########			0	ar	us		1	ar	application register log without reason please solve problem previous update excellent hope solution problem thank else lose large number customers	Negative	Google Play Store	0	1	0
Google Play Store	fb1f1c42-9648-4d58-86b5-40ac4741c6e8	the worst application first-best.	شروق الشمس	##########			0	ar	us		1	ar	bad application firstbest	Negative	Google Play Store	1	0	0
Google Play Store	6c53d153-af9c-4f74-903e-76837a1c5f7e	The application only opens in the second attempt. Please correct that.	Abd Jishi	##########			1	ar	us		3	ar	application open second attempt please correct	Neutral	Google Play Store	0	1	0
Google Play Store	d0fe9ea9-1813-4a6c-a330-69bf784e6942	The worst application and the worst bank in the Kingdom of Saudi Arabia.	Hashim Almutairi	##########			1	ar	us		1	ar	bad application bad bank kingdom saudi arabia	Negative	Google Play Store	1	0	0
Google Play Store	9b145738-7a76-4ea1-a465-d8183a1ee42a	Why has the application problem not been resolved yet? Many comments complain about the issue of the application not responding unless you try to log in for the second time. Unfortunately, your disregard for your customers is evidence of your lack of respect for them.	ابو فيصل	##########			0	ar	us		3	ar	application problem resolve yet many comment complain issue application respond unless try log second time unfortunately disregard customers evidence lack respect	Negative	Google Play Store	0	1	0
Google Play Store	ef66f881-565b-4fa7-88fb-9aac7796bb89	Unfortunately, the application is a failure. It was much better before the update.	Abu Khaled	##########			0	ar	us		1	ar	unfortunately application failure much good update	Negative	Google Play Store	1	1	0
Google Play Store	3d9178ba-fce4-4007-9145-0adf96432b66	After the last update, the process repeated very poorly and there was a delay in processing. I hope you can expedite the solution.	Mohammed Jokhab	##########			0	ar	us		1	ar	last update process repeat poorly delay process hope expedite solution	Negative	Google Play Store	1	0	1
Google Play Store	841e6471-f782-44b8-991e-d913049cb93f	If I try to log in, it kicks me out after the verification message.	bander Otaybe	##########			0	ar	us		5	ar	try log kick verification message	Neutral	Google Play Store	0	1	0
Google Play Store	08434dd8-c370-4bec-bf1f-aea1cb1fcaf0	After the latest update, entering the secret code sent to the mobile phone will open the application for 3 seconds and then log out. This means that you have to enter the secret code twice in order to open the application.	Khalid Osman	##########			2	ar	us		2	ar	late update enter secret code send mobile phone open application second log mean enter secret code twice order open application	Neutral	Google Play Store	0	1	0
Google Play Store	86df11ac-4637-4bdd-aff6-97a6829c8a25	The application has become unbearable... It requires two attempts to open... Insha'Allah, I will transfer my balance to another bank this week.	ابو جهاد	##########			0	ar	us		1	ar	application become unbearable require two attempt open inshaallah transfer balance another bank week	Negative	Google Play Store	1	0	0
Google Play Store	e2003b68-8bb2-4f87-91f1-bdcc459e8f29	the worst application, opening an account with them from the application doesn't work. the worstbank, with failed employees. There is no respect for the customer, their respect is only for your money. When you deposit your money with them, they invest it in questionable ways and treat you with disrespect. Disgraceful, to say the least.	الرجل المستهدف	##########			0	ar	us		1	ar	bad application open account application doesnt work worstbank fail employees respect customer respect money deposit money invest questionable ways treat disrespect disgraceful say least	Negative	Google Play Store	1	1	0
Google Play Store	f298c807-38c5-46d7-b685-19abff834d93	The application has become bad and it exits on its own immediately after logging in. Please solve the problem.	يوسف مبارك	##########			1	ar	us		2	ar	application become bad exit immediately log please solve problem	Negative	Google Play Store	1	1	0
Google Play Store	703aa7a7-dc71-4d90-a4f3-e5e93be2b5ab	"The application has become much better than before, but there is an observation that after logging out, I have to exit the application for the first time, then log in again, and it accepts entry. It's strange."	faridah aljameel	##########			1	ar	us		4	ar	application become much good observation log exit application first time log accept entry strange	Neutral	Google Play Store	1	0	0
Google Play Store	f02f1c8a-86b9-44af-8622-f2076eaf3d80	To access the application, you have to log in twice???!!! In the old version, it didn't require logging in twice. Please solve the problem.	calmister cklaive	##########			1	ar	us		1	ar	access application log twice old version didnt require log twice please solve problem	Negative	Google Play Store	0	1	0
Google Play Store	e8ed0464-0d8e-492d-aac2-6af4adc28a71	It has become bad after the last update, until writing this comment. Now, when I log in, I have to repeat the login process twice because the application automatically restarts itself the first time, so I have to log in again. There is a problem with it.	fwd Bx	##########			13	ar	us		1	ar	become bad last update write comment log repeat login process twice application automatically restart first time log problem	Negative	Google Play Store	1	1	0
Google Play Store	333250f5-8b2c-4068-bf03-7c1b0e509b65	The application is terrible and it doesn't work. When you try to log in, it kicks you out of the account.	الاسد الفاتك	##########			0	ar	us		1	ar	application terrible doesnt work try log kick account	Negative	Google Play Store	1	1	0
Google Play Store	dedf3540-01f9-4446-9f38-63df726074df	The application is excellent, but after the update, there is a problem with logging in. It logs you out and when you try to login again, please solve the problem.	sam t	##########			1	ar	us		1	ar	application excellent update problem log log try login please solve problem	Negative	Google Play Store	0	1	0
Google Play Store	5bcaf04b-1b38-474a-8a33-0db2bff35d71	The previous SABB application used to be slow, but now with the latest update and the name change to SABB Al-Awwal, it has become worse than before. At least before, it used to be slow, but now it's slow and hangs frequently. I have to open the application twice in order to use it. The first time it opens and immediately closes by itself, but the second time you can use it. Thank you for your eff…	Saleh Alhayqy	##########			2	ar	us		2	ar	previous sabb application use slow late update name change sabb alawwal become bad least use slow slow hang frequently open application twice order use first time open immediately close second time use thank effort	Negative	Google Play Store	1	0	1
Google Play Store	e43550da-8637-4c83-875a-6d87b9d33456	The application was excellent, but the latest update is not working. Why the delay? If we stayed on the old update, how can we access the application? It logs me out. How can we make payments or know our account? Please, redo the update maintenance.	وقت الغروب	##########			0	ar	us		1	ar	application excellent late update work delay stay old update access application log make payments know account please redo update maintenance	Negative	Google Play Store	1	1	1
Google Play Store	40c50b02-45c8-40e7-8b45-a5fc7f373f08	Exiting the application after the first login attempt and requiring two logins is very bad after the update.	abdulaziz saleh	##########			1	ar	us		1	ar	exit application first login attempt require two logins bad update	Negative	Google Play Store	1	1	0
Google Play Store	dffb5626-05af-455b-a2c4-f217b986deae	I log in twice and receive two messages to enter the program and perform an unrealistic process. The program has become extremely bad, and even the notes we write here are not followed or responded to by anyone, and no modifications are made. And if a new issue arises, it becomes a problem.	hameedo fitsh	##########			1	ar	us		1	ar	log twice receive two message enter program perform unrealistic process program become extremely bad even note write follow respond anyone modifications make new issue arise become problem	Negative	Google Play Store	1	1	0
Google Play Store	cf823255-00e8-472f-abf5-ba96ab724e80	The latest update is terrible in every sense of the word. The application never opens, every time I log in it kicks me out again. Because of this, it keeps crashing every time. Please fix it as soon as possible!!!!!!	J	##########			91	ar	us		1	ar	late update terrible every sense word application never open every time log kick keep crash every time please fix soon possible	Negative	Google Play Store	1	1	0
Google Play Store	1b79e8f3-963a-4bd1-bb7c-9ae51edcbfc9	The worst banking experience in the world.	Ali al-jaziri	##########			0	ar	us		1	ar	bad bank experience world	Negative	Google Play Store	1	0	0
Google Play Store	16a2d54b-8c2f-441e-835c-974b8c4d66c3	After the update, the application became annoying. I need to log in more than once.	Ibrahim Al Dolah	##########			0	ar	us		1	ar	update application become annoy need log	Negative	Google Play Store	1	0	0
Google Play Store	e69586d0-f9b6-4ad4-b60f-9c3b69b865d8	Repeating the exit from the application after logging in.	AHMAD ALSHALHOUB	##########			0	ar	us		1	ar	repeat exit application log	Neutral	Google Play Store	0	1	0
Google Play Store	4ec28b6f-9abe-4972-844a-738f032fff81	After the latest update and change of the name, I tried to login and received a login logo suddenly the program closed by itself.	مريم ادم	##########			0	ar	us		2	ar	late update change name try login receive login logo suddenly program close	Neutral	Google Play Store	0	1	0
Google Play Store	cb39f400-093d-49a8-a5ac-bbf99814d502	I wish the application would be developed to make it smoother, as I noticed that it crashes when I enter for the first time and then I have to enter again.	Nabeel Bukhari	##########			0	ar	us		1	ar	wish application would develop make smooth notice crash enter first time enter	Negative	Google Play Store	0	1	0
Google Play Store	fcf74080-e804-4e03-ac9f-f8eb2f56174e	The app was awesome, but after the updates, every time I enter it kicks me out right away. I'm exhausted, please find a solution for us. I've deleted it several times and downloaded it again, but the same thing happens. 🌿😦	Ana Ana	##########			0	ar	us		3	ar	app awesome update every time enter kick right away im exhaust please find solution us ive delete several time download thing happen	Negative	Google Play Store	1	0	0
Google Play Store	ab802ec6-a3f4-4e6d-b08c-84548f494f79	After the latest update, we are facing an emergency exit from the interface once again shortly after entering the program.	عبدالحميد أبوسيف	##########			0	ar	us		1	ar	late update face emergency exit interface shortly enter program	Neutral	Google Play Store	0	1	0
Google Play Store	514d4c3c-7ca4-4c99-982e-b0b1495c67cd	It needs a new update if you log in, the first sign appears and then it disconnects and asks for a new login.	H M	##########			0	ar	us		5	ar	need new update log first sign appear disconnect ask new login	Negative	Google Play Store	0	1	0
Google Play Store	0f25a984-419f-44a8-b92c-40700225ed86	Very bad program... ‼️ It doesn't work, and every time you enter, the program kicks you out.... Seriously, it's not suitable for a bank with this name and reputation... to have their application deteriorate at a time when even kids are technology experts of the highest level.... Your bank is an ignorant old man who can neither read nor write, compared to other banks‼️ Look... you have a quick sol…	بن سعد 77	##########			0	ar	us		1	ar	bad program doesnt work every time enter program kick seriously suitable bank name reputation application deteriorate time even kid technology experts high level bank ignorant old man neither read write compare bank look quick solution customers leave start imitator alrajhi bank good example honestly application topnotch benefit experience friends	Negative	Google Play Store	1	1	0
Google Play Store	7eb3bf10-ee0c-485b-93b5-0babce4c7b98	The application is very unsuccessful after the update. After requesting the login code, it crashes. This bank is the worst bank I have dealt with.	الحر	##########			0	ar	us		1	ar	application unsuccessful update request login code crash bank bad bank deal	Negative	Google Play Store	1	1	1
Google Play Store	13417449-04ed-41b9-9526-beca8847f7d6	It was good, but now I need to login twice. The first time, the program closes after that, then I login again. I hope for a solution.	Khalid Centr	##########			0	ar	us		1	ar	good need login twice first time program close login hope solution	Negative	Google Play Store	0	1	0
Google Play Store	d82a9f68-bc86-4ae9-b3c8-f60d62f7dc07	It is very fast after the latest update.	محمد السهيلي	##########			0	ar	us		1	ar	fast late update	Positive	Google Play Store	0	0	0
Google Play Store	fa913369-1462-4e7f-9f88-b17a3e925c66	Excellent application, but after the latest update, after registering and logging into the application, it kicks you out again until you log in again. Please solve this problem. Thank you.	Abu Mujtaba	##########			1	ar	us		4	ar	excellent application late update register log application kick log please solve problem thank	Negative	Google Play Store	1	1	0
Google Play Store	65dea284-3436-4342-96da-442b48367cef	Worse after the latest update.	faisal alahmed	##########			0	ar	us		2	ar	bad late update	Negative	Google Play Store	1	0	0
Google Play Store	a9df1f56-4e20-4676-85e9-97515c93f3cd	The application after the new update is very bad.	Hassan Al Abrieh	##########			0	ar	us		1	ar	application new update bad	Negative	Google Play Store	1	0	0
Google Play Store	21fedcf3-fd1a-4448-9197-55282ecdc100	A useless application that is not worth downloading.	Ahmad Bin Ahmad	##########			0	ar	us		1	ar	useless application worth download	Negative	Google Play Store	1	1	0
Google Play Store	d3831143-3f87-4530-aabe-7cdaffc7cc65	"The automatic login and logout at the same time is very bad, the app is not working."	نشوان النقيب	##########			1	ar	us		1	ar	automatic login logout time bad app work	Negative	Google Play Store	1	1	0
Google Play Store	9ad5c4bb-b750-4171-9218-23e79413327e	The application is not working after merging the first and updating the interface!	Abdulrhman Omar	##########			0	ar	us		1	ar	application work merge first update interface	Negative	Google Play Store	0	1	0
Google Play Store	e0e9fa7a-f549-4565-b7de-4233806c7e8a	"The application is good, I hope to add an online marketplace."	rwra melo	##########			1	ar	us		5	ar	application good hope add online marketplace	Positive	Google Play Store	1	0	0
Google Play Store	35cc0a91-cc26-40d8-ab55-0d30f8be1b23	The latest update is frustrating... I have to log in twice for it to open properly 🫠.	Mym Oo	##########			0	ar	us		3	ar	late update frustrate log twice open properly	Negative	Google Play Store	1	1	1
Google Play Store	81bc8be0-4753-4480-bebb-c96bc78d48f7	It opens and closes, and I open it again and close it. A program that requires experienced programmers.	mousa sdc	##########			0	ar	us		1	ar	open close open close program require experience programmers	Neutral	Google Play Store	1	0	0
Google Play Store	0222f9ac-0b68-48cb-bb75-c92d30ae9e13	Good.	البرنس خالد	##########			0	ar	us		3	ar	good	Positive	Google Play Store	0	0	0
Google Play Store	b9b54a81-4f1a-4c97-bb0f-7b2ac6836a94	After the update, it has become bad. When I try to log in, it suddenly signs me out and I have to log in again.	اياد العقيلي	##########			0	ar	us		1	ar	update become bad try log suddenly sign log	Negative	Google Play Store	1	1	0
Google Play Store	c8b950b3-6d97-47a1-8145-f92a14e39a8b	Veryyyyyy bad	مباشر من الحرم المكي	##########			0	ar	us		1	ar	veryyyyyy bad	Negative	Google Play Store	1	0	0
Google Play Store	27ca0484-2196-4f0c-9d40-3536fad71771	Masha Allah, the application has gone from bad to worse. What is this update, you have to open it twice.	Mohamed adel	##########			1	ar	us		1	ar	masha allah application go bad bad update open twice	Negative	Google Play Store	1	1	0
Google Play Store	5be4c554-8d88-4e01-b55e-06a58c06571a	The best application ever.	ابراهيم الحسيني	##########			0	ar	us		5	ar	best application ever	Positive	Google Play Store	0	0	0
Google Play Store	dbc755c6-4c1c-4a64-8aa4-5bd21354a2e4	There is a problem in it, every time I log in, the application logs me out and I have to log in again. This keeps happening to me without a solution to this problem. I have to log in again for the application to open with me.	محب الخير	##########			0	ar	us		3	ar	problem every time log application log log keep happen without solution problem log application open	Negative	Google Play Store	0	1	0
Google Play Store	8c9377fb-1c7e-4ea9-b72d-ee79273b2a5e	The application does not open on the first try, unlike the previous application which was excellent. Please solve the problem.	علي الناصر	##########			0	ar	us		3	ar	application open first try unlike previous application excellent please solve problem	Negative	Google Play Store	0	1	0
Google Play Store	28cc6173-93f9-4033-bffd-01f1a231730a	The application is very bad after the latest update. After entering the password and code, the application closes and asks for registration again.	nasser faraj	##########			0	ar	us		1	ar	application bad late update enter password code application close ask registration	Negative	Google Play Store	1	1	0
Google Play Store	65d84077-4e13-41c7-9aa5-7edbe9ebda05	The latest update is very frustrating, it requires entering the application twice. The first time it hangs, then the second time it opens.	H alhazmi	##########			0	ar	us		1	ar	late update frustrate require enter application twice first time hang second time open	Negative	Google Play Store	1	0	1
Google Play Store	3a7d8725-5b4a-4a0b-a029-b37b228d15a3	Improved slightly compared to before, and many times I need to log in twice before accessing the application.	Nasser F	##########			0	ar	us		4	ar	improve slightly compare many time need log twice access application	Neutral	Google Play Store	0	1	0
Google Play Store	5e4701cf-cdca-4c0b-9b6c-9f667854ee07	The new update is very bad and thank you.	Osama Ib1617	##########			0	ar	us		1	ar	new update bad thank	Negative	Google Play Store	1	0	0
Google Play Store	4f32db0d-66f9-469e-bb56-c23178063671	The latest update is very buggy, every time I enter it kicks me out and requires me to re-enter.	wael alrefaey	##########			0	ar	us		1	ar	late update buggy every time enter kick require reenter	Negative	Google Play Store	0	1	0
Google Play Store	8b284fba-4118-4248-9021-b65a19f4eea8	The application was excellent before the latest update. After the update, the issue of logging out of the account immediately after logging in keeps recurring, and it requires trying to log in once or twice before it responds. We hope to find a solution to the problem.	Hani	##########			81	ar	us		1	ar	application excellent late update update issue log account immediately log keep recur require try log twice respond hope find solution problem	Negative	Google Play Store	1	1	0
Google Play Store	f18962d7-ea0e-4bd0-9d31-064b994c2863	After the latest update, the application has become bad. After entering the password, a message appears saying that I have logged in, but it enters and exits the application. Then, I am forced to re-enter the password and log in again. Please solve this problem.	سلمان علي	##########			7	ar	us		2	ar	late update application become bad enter password message appear say log enter exit application force reenter password log please solve problem	Negative	Google Play Store	1	1	0
Google Play Store	80c03cbf-b2b8-4e45-adad-6e3006a70df5	When logging in, the application crashes and requires logging in again. The new update is a failure.	Ahmed Ramadan	##########			0	ar	us		1	ar	log application crash require log new update failure	Negative	Google Play Store	0	1	1
Google Play Store	29a929b6-3bad-4c60-aa29-facc298b6460	The program is very bad. Whenever I try to log in, it logs me out again and asks for another login. I can't do anything or access my account. Please solve the problem as soon as possible.	صلاح علي	##########			0	ar	us		1	ar	program bad whenever try log log ask another login cant anything access account please solve problem soon possible	Negative	Google Play Store	1	1	0
Google Play Store	d9011917-284b-4cee-819c-88a57564437e	The latest update has become bad. Now, you have to enter the login code twice. The first time it kicks you out, and then you have to enter the code again. Also, there is no automatic verification of the codes after confirming each transaction, such as transfers and payments. We have to enter the code manually, unlike most other banking applications where it is automatic after each transaction.	أسير الإحساس	##########			0	ar	us		2	ar	late update become bad enter login code twice first time kick enter code also automatic verification cod confirm transaction transfer payments enter code manually unlike bank applications automatic transaction	Negative	Google Play Store	1	1	0
Google Play Store	c3b2ff15-68dd-4559-b8aa-dcf7469c2600	After the name change to the First Bank, the problem of continuous closing repetition has occurred.	ALI A. A	##########			0	ar	us		4	ar	name change first bank problem continuous close repetition occur	Neutral	Google Play Store	1	0	1
Google Play Store	44f7ebef-bc89-4a40-af80-ce7d68781d78	The application has a problem during login. It requires logging in twice consecutively.	MOHAMMED ABDELLATIF	##########			3	ar	us		1	ar	application problem login require log twice consecutively	Negative	Google Play Store	0	1	0
Google Play Store	50916005-d9eb-4b0e-b61a-a5c5fac9463e	Unfortunately, the application is going from bad to worse. I mean, if you cared about what is written or the comments, you would have felt a little bit of frustration. The application now doesn't open, it just keeps spinning when we enter the password and then it closes.	gehad megdad	##########			0	ar	us		1	ar	unfortunately application go bad bad mean care write comment would felt little bite frustration application doesnt open keep spin enter password close	Negative	Google Play Store	1	1	0
Google Play Store	cb6a6fea-52ae-4b9c-8a27-0efa27fe7b65	We wish you success and continued progress, a distinguished bank.	محمد المرشدي	##########			0	ar	us		5	ar	wish success continue progress distinguish bank	Positive	Google Play Store	1	0	0
Google Play Store	77c24c5d-a987-4302-a29b-5a2b7b69d494	The application after the update is bad.	ابراهيم المحاصي	##########			0	ar	us		1	ar	application update bad	Negative	Google Play Store	1	0	0
Google Play Store	1b7020a3-2221-4556-a29b-bd740088550f	Oh nicehearts, the application got messed up after the update. Now I have to enter the username and password twice, it takes time to log in. Please add fingerprint recognition, it's faster. Don't go back; you used to be good.	ibrahim alzahrani	##########			0	ar	us		1	ar	oh nicehearts application get mess update enter username password twice take time log please add fingerprint recognition fast dont go back use good	Negative	Google Play Store	0	0	1
Google Play Store	7b4a1c8f-2235-4906-a76f-c59f70aebf11	Upon entering and receiving the verification code, the application is restarted and starts over... to solve the problem immediately.	tareq mirza	##########			0	ar	us		2	ar	upon enter receive verification code application restart start solve problem immediately	Neutral	Google Play Store	0	1	0
Google Play Store	2b969719-fb75-46cd-b904-91dc0fa7bab9	After the update, the application started closing after entering the numbers sent by the bank. It has been 4 days and the problem hasn't been resolved. Let's assume you are outside the Kingdom.	Mohammad Alhamlan	##########			0	ar	us		1	ar	update application start close enter number send bank days problem hasnt resolve let assume outside kingdom	Negative	Google Play Store	0	1	0
Google Play Store	cbe4466c-94ae-4cb5-ab66-c712905cd22c	Updating the status has become a bad application, when we try to enter it, it kicks us out immediately.	عادل العبيد	##########			0	ar	us		1	ar	update status become bad application try enter kick us immediately	Negative	Google Play Store	1	1	0
Google Play Store	e0600523-6680-4075-b606-d040ed1a4bb4	"The application has been refusing to open for five days. This is really frustrating, we have been trying to use your application but it keeps having issues."	AL-Malki Reem	##########			1	ar	us		1	ar	application refuse open five days really frustrate try use application keep issue	Negative	Google Play Store	1	1	0
Google Play Store	1568146f-56c4-42ce-b7d2-6ba36ebfe6b6	Beautiful and easy.	maymoonah العبد العظيم	##########			0	ar	us		5	ar	beautiful easy	Positive	Google Play Store	0	0	0
Google Play Store	4354a3b0-8239-47f8-bfc4-56ef8690f7f6	Needs development	ahmad ss	##########			0	ar	us		1	ar	need development	Neutral	Google Play Store	1	0	0
Google Play Store	d03c6e6b-d37f-4c03-b5a2-a0e7358e4e39	The update is bad, it kicks you out of the program after entering the code. You have to log in twice, and the program hangs and kicks you out during the process.	Bu MOHAMMED	##########			0	ar	us		1	ar	update bad kick program enter code log twice program hang kick process	Negative	Google Play Store	1	1	1
Google Play Store	e6267f2a-324b-4c78-8ce6-7a1e4550650f	Oh my goodness, this application is driving us crazy. We want to make a payment, we want to transfer money, but it keeps opening and closing, and it asks for new registration.	المستشار	##########			0	ar	us		5	ar	oh goodness application drive us crazy want make payment want transfer money keep open close ask new registration	Negative	Google Play Store	1	1	0
Google Play Store	1c672c6f-84a4-4b1f-9246-c7f8a08a2b04	The latest update is not working properly. I advise against updating it. Every time I enter the application, it kicks me out. How long will this continue? This error must be fixed.	khalid abdullah	##########			0	ar	us		5	ar	late update work properly advise update every time enter application kick long continue error must fix	Negative	Google Play Store	0	1	0
Google Play Store	73c7daf9-9a86-409a-887b-776c10ed2f44	The application is bad, as soon as I log in, it logs me out. I cannot follow up or send any money.	mahmoud qaban	##########			0	ar	us		1	ar	application bad soon log log follow send money	Negative	Google Play Store	1	0	0
Google Play Store	099b2fd6-bc3d-49bd-907f-24efbb9bfc26	Very, very, very bad update and I can't log in except after many attempts.	Ahmad Asiri	##########			1	ar	us		1	ar	bad update cant log except many attempt	Negative	Google Play Store	1	1	0
Google Play Store	847d70ae-55d1-4d8a-a0f6-9f8e4c421050	The modification has become good now.	Sameh Elnage	##########			0	ar	us		4	ar	modification become good	Positive	Google Play Store	1	0	0
Google Play Store	7899ae44-4fba-4ed6-8447-97df32d57576	The worst app you could come across in your life.	تميم بن بندر	##########			0	ar	us		1	ar	bad app could come across life	Negative	Google Play Store	1	0	0
Google Play Store	455bcdb5-db92-4b75-bf4e-06cac5ec31ae	The application keeps kicking me out repeatedly, please fix it immediately.	Talal Al-Yazidi	##########			0	ar	us		1	ar	application keep kick repeatedly please fix immediately	Negative	Google Play Store	0	1	0
Google Play Store	c9047cb5-0d45-427e-9a48-bb0927340863	It has become much easier after the new update, you don't have to say "log in" multiple times for it to work correctly.	Mohammed Omar	##########			1	ar	us		1	ar	become much easy new update dont say log multiple time work correctly	Positive	Google Play Store	0	1	0
Google Play Store	d3648849-4745-4ee7-bbd4-31613aebbf6a	Very bad, very bad	فهد مغرم الغامدي	##########			0	ar	us		1	ar	bad bad	Negative	Google Play Store	1	0	0
Google Play Store	33427cfc-b55d-4001-b26c-74b7fa088866	The application has become bad, especially when it comes to logging in. I have to enter my login information twice in order for it to open for me.	moh Khal	##########			0	ar	us		4	ar	application become bad especially come log enter login information twice order open	Negative	Google Play Store	1	1	0
Google Play Store	64b8612b-38dd-4d77-9163-8ebd7d01c7a6	When I try to log in, the application immediately closes and I receive a text message asking me to log in. I need to log in again, and then it opens for me. Please solve the problem.	yaqoub alhmoud	##########			25	ar	us		3	ar	try log application immediately close receive text message ask log need log open please solve problem	Negative	Google Play Store	0	1	0
Google Play Store	8157faed-c434-4280-a80e-30154a38f205	After the update, the application stopped working.	Mohamed Lotfy	##########			0	ar	us		1	ar	update application stop work	Negative	Google Play Store	0	1	0
Google Play Store	73a4de90-4ff4-4f9f-8a4c-af0a268c68c8	Honestly, the update has caused me a lot of hassle. It's very boring. I login and it logs me out by itself, then I have to login again immediately. Honestly, it's a waste of time. Please correct the mistakes.	Jassim qallaf	##########			0	ar	us		5	ar	honestly update cause lot hassle bore login log login immediately honestly waste time please correct mistake	Negative	Google Play Store	0	1	1
Google Play Store	219deea2-3ad6-4f02-83fd-37f608685916	It became bad after the update.	يوسف عثمان	##########			0	ar	us		1	ar	become bad update	Negative	Google Play Store	1	0	0
Google Play Store	c1586c62-9a70-4298-80fc-9968f5584f9f	The worst bank and not the first bank.	Fofo AL-GHAMDI	##########			0	ar	us		1	ar	bad bank first bank	Negative	Google Play Store	1	0	0
Google Play Store	ef4ed7d9-e8b9-4f44-aee1-aaf807f19564	Very, very bad application. I have tried entering the password four times, but there is no response. This version is the worst.	Bahaa Ashour	##########			2	ar	us		1	ar	bad application try enter password four time response version bad	Negative	Google Play Store	1	1	0
Google Play Store	52fc3cd5-78c6-4a51-adae-71ca54ab7fb7	After the update, it started to log me out when I try to login. I have to login again.	بدر الهذلي	##########			1	ar	us		1	ar	update start log try login login	Neutral	Google Play Store	0	1	0
Google Play Store	83566659-8d46-4b20-b896-0b1f187d3411	Please update as soon as possible, there is an error when trying to login.	Drim levo	##########			0	ar	us		1	ar	please update soon possible error try login	Negative	Google Play Store	0	1	0
Google Play Store	9f76bc7a-bc9f-4920-9a62-f3d2bc123fab	The latest update is not good, as it accepts the password, opens the program, and closes it at the same time.	هانى السيد	##########			5	ar	us		1	ar	late update good accept password open program close time	Negative	Google Play Store	0	1	0
Google Play Store	aad7ade5-fd2b-46de-aa32-f4efd848c6d7	The application does not work and stops after logging in, and it takes you back to login again. Please pay attention and provide assistance.	MoMo MoMo	##########			1	ar	us		3	ar	application work stop log take back login please pay attention provide assistance	Negative	Google Play Store	0	1	0
Google Play Store	3ba4627d-a4c0-4628-a8f5-b9d69a60d205	There is a problem with the application that immediately logs me out and changes the bank's name, which does not indicate reassurance.	ابراهيم علي الخدري	##########			2	ar	us		1	ar	problem application immediately log change bank name indicate reassurance	Negative	Google Play Store	0	1	0
Google Play Store	51a5af00-72e9-4150-b4fb-a1114ceac1b5	The latest update of the first mobile is very bad. It doesn't enter the application, and messages arrive late. And when you enter the application, it logs you out again.	Mohammed Alhmyri	##########			3	ar	us		1	ar	late update first mobile bad doesnt enter application message arrive late enter application log	Negative	Google Play Store	1	1	0
Google Play Store	100db6b2-f7de-4f40-b270-7b2455f8cf56	The application exits immediately upon opening it and entering the verification code, and we repeatedly try the same problem.	Ismail Eldaidamony	##########			2	ar	us		1	ar	application exit immediately upon open enter verification code repeatedly try problem	Negative	Google Play Store	0	1	0
Google Play Store	d86f47ab-859c-4fbc-bdcf-ad6ff0aeb675	The worst banking application.	كابتن غازى	##########			0	ar	us		1	ar	bad bank application	Negative	Google Play Store	1	0	0
Google Play Store	6bbb0587-1676-4053-a94e-29c2dc193e3e	The new update is very bad. Every time I try to access the application after entering the password, it shows that I have logged in, and then it completely exits the application. I have repeated the process several times, but the same situation remains. Please reconsider the update process.	‪HILAL ALKhamis (Abu Fatima)‬‏	##########			18	ar	us		1	ar	new update bad every time try access application enter password show log completely exit application repeat process several time situation remain please reconsider update process	Negative	Google Play Store	1	1	0
Google Play Store	f0be3350-91da-4235-af36-3c7665776137	bad	سلطان احمد	##########			0	ar	us		1	ar	bad	Negative	Google Play Store	1	0	0
Google Play Store	cf75f76e-93f4-4b62-be1c-13a3154426c8	After the new update, it became better.	saleh ALfawaz	##########			0	ar	us		1	ar	new update become good	Positive	Google Play Store	1	0	0
Google Play Store	d76dbef5-0383-404b-8c88-bf906b90723e	The application is terrible, it opens and closes quickly at the same time, and the branch services are very slow. The website is poor and sluggish, and the integration of the ATM card and the digital card is complicated. The digital card disappeared from the online and the application when I visited the branch to use the ATM.	wael elmesery	##########			1	ar	us		1	ar	application terrible open close quickly time branch service slow website poor sluggish integration atm card digital card complicate digital card disappear online application visit branch use atm	Negative	Google Play Store	1	1	1
Google Play Store	a1bc1c30-b27b-4040-8b8d-e6e552ad65a4	The application automatically logs out after the first login, and on the second login, it logs in normally. There used to be no problem with it.	Yemen Dev	##########			1	ar	us		5	ar	application automatically log first login second login log normally use problem	Neutral	Google Play Store	0	1	0
Google Play Store	6aeb6876-64e0-4e8c-a452-c10c79b7572c	The application no longer works after logging in and entering the verification code, it returns to the login page and the application freezes.	saad alhokail	##########			1	ar	us		1	ar	application long work log enter verification code return login page application freeze	Negative	Google Play Store	0	1	1
Google Play Store	fe07f52d-a65b-4142-9582-9525ae6fa34d	The application does not open and does not accept verification with access.	M A	##########			0	ar	us		1	ar	application open accept verification access	Negative	Google Play Store	0	1	0
Google Play Store	18bab8da-1170-4fba-9ec5-9b76a9e1b7c4	It does not work.	Ahmed Ebrahim	##########			0	ar	us		1	ar	work	Negative	Google Play Store	0	1	0
Google Play Store	4e9e8634-8a60-4c96-a0c5-be39a814f89d	Great	DIFALLH Alkhadidi	##########			0	ar	us		5	ar	great	Positive	Google Play Store	0	0	0
Google Play Store	168f06a4-b9e1-4fc1-a19d-44c5622a8efc	We have finished with the integration issues between Samba and Al-Ahli Bank. We solved our own problems first and took on your problems.	alhilal easy	##########			3	ar	us		1	ar	finish integration issue samba alahli bank solve problems first take problems	Neutral	Google Play Store	0	1	0
Google Play Store	d4e88f89-de2b-4f2f-88b9-f806cef3c2ca	The application closes as soon as it is opened.	R R	##########			0	ar	us		1	ar	application close soon open	Neutral	Google Play Store	0	1	0
Google Play Store	a178e6de-50bc-4ef2-b4b4-cf7b60db6671	Very, very bad when entering, exits from the program.	Ali Aldosari	##########			0	ar	us		1	ar	bad enter exit program	Negative	Google Play Store	1	1	0
Google Play Store	8dd6d96a-fc9f-428f-8a02-2e31cc1dd9b3	After the verification code is entered, the application exits and the process repeats from the beginning.	عبدالله البخيتان	##########			0	ar	us		1	ar	verification code enter application exit process repeat begin	Neutral	Google Play Store	0	1	0
Google Play Store	27a36c99-a675-4ca6-b3b1-9c708de4cbda	The application is not working.	Abbas Khasharim	##########			0	ar	us		1	ar	application work	Negative	Google Play Store	0	1	0
Google Play Store	79bfb058-db72-4204-a943-c7c6e2571a7e	When logging in, you must enter the username and password twice. 🙈	احمد الرحماني (ابو الوليد)	##########			0	ar	us		1	ar	log must enter username password twice	Neutral	Google Play Store	0	1	0
Google Play Store	d8be70ba-8cdb-4997-a04e-5437ef1e4a02	The latest update is very bad.	فؤاد جرارعة	##########			0	ar	us		1	ar	late update bad	Negative	Google Play Store	1	0	0
Google Play Store	0a1e088a-7296-4da3-a633-6efd4b006507	The application "Like Al-Kharrar" is very popular and highly rated.	ديم Gh	##########			0	ar	us		1	ar	application like alkharrar popular highly rat	Positive	Google Play Store	0	0	0
Google Play Store	509eb166-2e78-44b2-83f2-1b0af6a75901	For those who are unable to log into their SAP account, I have found a solution for you, God willing. When you open the application, you will find at the bottom left the option to create a digital security code. Click on it and then activate the quick login option. We will contact you and you must confirm by pressing the number 1 for verification. A screen will open with 6 boxes that you need to …	كوكي كوكي	##########			0	ar	us		4	ar	unable log sap account find solution god will open application find bottom leave option create digital security code click activate quick login option contact must confirm press number verification screen open box need fill personal number confirm number verification code send login important save serve secret password quick login application open god will enjoy service	Neutral	Google Play Store	0	1	0
Google Play Store	d1971882-6f35-47d8-b80b-22793a9fba89	The worst bank and the worst application.	Abdulmohsen Alshahrani	##########			0	ar	us		1	ar	bad bank bad application	Negative	Google Play Store	1	0	0
Google Play Store	deeda88d-01ef-48b2-86a9-79cf4208c02b	There is a problem with the application.	معاذ مختار	##########			0	ar	us		1	ar	problem application	Negative	Google Play Store	0	1	0
Google Play Store	89f0c5ed-af93-426b-93d1-89bf8dd6640f	Very bad. After the update.	IBRAHIM ALNASHRI	##########			0	ar	us		1	ar	bad update	Negative	Google Play Store	1	0	0
Google Play Store	9165f216-1123-46c8-8e9e-eba49f9c61cc	The application is very bad.	Mohammed Hamdi	##########			0	ar	us		1	ar	application bad	Negative	Google Play Store	1	0	0
Google Play Store	63a12070-38f0-4aa8-9b18-f824bfb59723	The system has become complicated and does not go to the previous step for calculation, it returns you back to the beginning.	ابراهيم عياشي	##########			0	ar	us		1	ar	system become complicate go previous step calculation return back begin	Negative	Google Play Store	1	0	0
Google Play Store	7aa3cd9c-55da-4380-a13e-aee58c77af60	The application crashes after the update. It seems upset about the new name.	Khalid Al Rubaie	##########			0	ar	us		1	ar	application crash update seem upset new name	Negative	Google Play Store	1	1	0
Google Play Store	2646e6dc-5e5c-426d-961a-6f5d8640cb27	When I try to log in, I receive a message saying that my username has been blocked.	عبدالرحمن باحسن	##########			0	ar	us		2	ar	try log receive message say username block	Negative	Google Play Store	0	1	0
Google Play Store	5823c81c-b5c2-4fab-80b3-b1aa7ddefb1a	Excellent very much	Hosny Negm	##########			0	ar	us		5	ar	excellent much	Positive	Google Play Store	0	0	0
Google Play Store	4f46e27a-8db1-4148-bee3-5fa685c5ab1e	The application has become unable to log in more than once after the update, and it logs out.	Hema Salem	##########			1	ar	us		2	ar	application become unable log update log	Negative	Google Play Store	0	1	0
Google Play Store	2e0f52bc-1beb-4c5e-8a0f-b75b7a9108ed	The worst bank application, it is very bad, does not deserve any star.	Ali Sroor	##########			1	ar	us		1	ar	bad bank application bad deserve star	Negative	Google Play Store	1	0	0
Google Play Store	7072a01a-9a06-459f-bf9b-81fb7116c621	Very bad, it keeps crashing then kicking you out, and the fingerprint authentication is disabled. The application is a disgrace to SAP.	behave yourself	##########			3	ar	us		1	ar	bad keep crash kick fingerprint authentication disable application disgrace sap	Negative	Google Play Store	1	1	1
Google Play Store	86495ed3-3e88-40fe-9920-8254aac5c7ec	Every time I log in, the application closes and I have to log in again, and it keeps closing like this, so I am unable to access my account.	abdullah abdullah	##########			3	ar	us		1	ar	every time log application close log keep close like unable access account	Negative	Google Play Store	0	1	0
Google Play Store	9a6a43b7-a841-42a3-a923-635d0d825acf	"I honestly have never seen an update for an application as bad as this one. The application has not been working for days and there is no response or news about it."	ghannam alajmi	##########			5	ar	us		1	ar	honestly never see update application bad one application work days response news	Negative	Google Play Store	1	1	0
Google Play Store	52f254b0-58dd-4775-81a8-b9c78a24a12f	The latest update is very bad, I have to log in multiple times.	أيمن الأسمري	##########			1	ar	us		1	ar	late update bad log multiple time	Negative	Google Play Store	1	1	0
Google Play Store	5987ac4e-f049-466d-8e84-509646011146	The application is not working.	MAJED Asery	##########			0	ar	us		1	ar	application work	Negative	Google Play Store	0	1	0
Google Play Store	020a0617-5015-4fe9-8a77-b6e5326bfab2	With the update, the bank has become worse. It opens the program and then closes it, causing you to lose customers.	عبدالهادي السلمان	##########			0	ar	us		1	ar	update bank become bad open program close cause lose customers	Negative	Google Play Store	1	1	0
Google Play Store	a1199fa6-71ca-485e-b67b-c12c0ca0380a	The new update is very bad. I have to enter the password twice for the website to open. I enter it the first time and it seems like it opened, but it takes me back again to enter the password. 🫤	خلود الصاعدي	##########			2	ar	us		1	ar	new update bad enter password twice website open enter first time seem like open take back enter password	Negative	Google Play Store	1	1	0
Google Play Store	ccb1c5d7-efa2-4831-8994-cc6d4ecf510a	There is a problem with the application after the update.	Ali Hussain	##########			0	ar	us		1	ar	problem application update	Negative	Google Play Store	0	1	0
Google Play Store	09a7ff0c-a0d0-4e53-8276-9df52e8fd328	the worst application that doesn't work at all. I log in and it kicks me out. Go and open an account with Al Rajhi bank, it's better.	NADA SIREEN	##########			0	ar	us		1	ar	bad application doesnt work log kick go open account al rajhi bank good	Negative	Google Play Store	1	1	0
Google Play Store	075ab716-ffba-43f4-9989-fdf597eac7e0	The application is bad.	saad harbi	##########			0	ar	us		1	ar	application bad	Negative	Google Play Store	1	0	0
Google Play Store	93b32001-11b3-4ebf-a6dd-d0f82c147b2e	I do not recommend using the application after its update because it is not worth it to open an account with them. On top of that, their automated response will raise your blood pressure for an hour and no one will respond to you. The automated reply takes more than half an hour, and your uncle is deaf.	Naif Albait	##########			0	ar	us		1	ar	recommend use application update worth open account top automate response raise blood pressure hour one respond automate reply take half hour uncle deaf	Negative	Google Play Store	1	0	0
Google Play Store	028c0dd2-3ec3-4f0f-9fad-1c7116e877fe	The trash program	المستشار 70	##########			0	ar	us		1	ar	trash program	Negative	Google Play Store	1	0	0
Google Play Store	700ca6f5-ce16-4377-906b-53d60fe816ca	The app has become very laggy and crashes me out as soon as I enter it after the update.	ياسر مغيربى	##########			0	ar	us		1	ar	app become laggy crash soon enter update	Negative	Google Play Store	0	1	1
Google Play Store	20ea4b50-c97c-4b64-96c9-ad35a2878ff7	The application is not working.	Mohammed Albnaa	##########			0	ar	us		1	ar	application work	Negative	Google Play Store	0	1	0
Google Play Store	f5096f23-dfed-43bb-b5b9-73a983749f01	Upon entering the application, there is a very bad issue where you get immediately kicked out of the page and it asks you to log in again.	BN DR	##########			0	ar	us		1	ar	upon enter application bad issue get immediately kick page ask log	Negative	Google Play Store	1	1	0
Google Play Store	dc835ca7-3ce7-4ced-a516-2ade591501d0	The update feature is not working.	زفير حرف	##########			0	ar	us		1	ar	update feature work	Negative	Google Play Store	0	1	0
Google Play Store	04d69b7a-0b97-494d-b2f0-8c14154439b8	Bad, if I enter, it kicks me out immediately. I want to make transfers but I can't. Every time I enter, it kicks me out immediately.	Ali Abdulhussain	##########			0	ar	us		1	ar	bad enter kick immediately want make transfer cant every time enter kick immediately	Negative	Google Play Store	1	1	0
Google Play Store	501e40ce-d0e5-41cb-9de2-424b8fcc1cd1	This bank is the most frustrating for me online.	beero اللهم اغفرلي ولوالدي	##########			0	ar	us		1	ar	bank frustrate online	Negative	Google Play Store	1	0	0
Google Play Store	5a8525f8-0d8f-4949-9556-a82ca26e67d5	After the update, unfortunately, it does not enter. The password is entered, but the application closes. It has been like this for two days now.	محمد الناصر	##########			0	ar	us		1	ar	update unfortunately enter password enter application close like two days	Negative	Google Play Store	0	1	0
Google Play Store	ae772afb-443f-4b30-bc5e-f06237561d96	After the update, the application completely stops at the first screen without any movement. It does not accept entering the verification code. What is happening with the application?	نزيه	##########			162	ar	us		1	ar	update application completely stop first screen without movement accept enter verification code happen application	Negative	Google Play Store	0	1	0
Google Play Store	92d5f130-194f-4135-a9ae-fc56013633d4	The application has become a failure after the latest update.	Iff Jvc	##########			0	ar	us		1	ar	application become failure late update	Negative	Google Play Store	0	1	0
Google Play Store	d968ae8f-daf1-4c69-bbca-0f0c82663c29	After the update, it becomes bad. It freezes and crashes, and then you have to log in again.	Baraa Ghunaim	##########			0	ar	us		1	ar	update become bad freeze crash log	Negative	Google Play Store	1	1	1
Google Play Store	c1ecfc98-3c71-4ffd-9d48-77f4a6f7a6fa	Why do I come in if it kicks me out?	علي مجرشي	##########			0	ar	us		5	ar	come kick	Negative	Google Play Store	0	0	0
Google Play Store	32d38b2b-38e1-4353-b62b-768c0c1d3d49	What's wrong? The application doesn't open. Every time I try to log in, it kicks me out. I updated it but with no effect. Please fix the problem, or we'll have to give up on it without turning back.	حساب قوقيل الاساسي	##########			2	ar	us		2	ar	whats wrong application doesnt open every time try log kick update effect please fix problem well give without turn back	Negative	Google Play Store	0	1	0
Google Play Store	1cd9f4b0-4edf-41fb-9d25-cf6557e053fb	The first mobile is 100%.	برق رعد صاعقة طيارة حربية مدرعة مرعبة 100%	##########			0	ar	us		5	ar	first mobile	Positive	Google Play Store	0	1	0
Google Play Store	a06eaf41-4448-48f3-b2cf-689c2d3bd503	The app does not open with me more than once and does not get installed.	AFIF MEDO	##########			0	ar	us		1	ar	app open get instal	Negative	Google Play Store	0	1	0
Google Play Store	01b6fa1c-8fe0-481b-8820-5525f66703ff	I need to register twice, it needs maintenance.	أحمد البراز	##########			0	ar	us		1	ar	need register twice need maintenance	Neutral	Google Play Store	0	1	0
Google Play Store	84e257df-b2aa-4b57-a533-f1f0ede7111e	The application has become very bad after the latest update. As soon as I enter it, it closes immediately. Please resolve the issue.	ابواحمد اليماني	##########			0	ar	us		1	ar	application become bad late update soon enter close immediately please resolve issue	Negative	Google Play Store	1	1	0
Google Play Store	7e35239d-9ae9-406d-b1f1-7730f49e53f7	Now it has become the last, not the first. Every time you log in, after 10 seconds, it tells you the session ended... 5 times in a row. I wish you hadn't changed it.	GG GG	2023-04-09 00:28:00			0	ar	us		1	ar	become last first every time log second tell session end time row wish hadnt change	Negative	Google Play Store	1	0	0
Google Play Store	86b80834-c764-4054-a420-e97d77656eae	The program is still very bad, there are many errors and it is not possible to perform a proper operation without encountering errors in the program. Instead of making it easier for us, you have made it more difficult. Thank you for not providing anything less than a substandard program like SAP. Unfortunately, this program does not live up to your reputation.	Hani Albasha	##########			38	ar	us		1	ar	program still bad many errors possible perform proper operation without encounter errors program instead make easy us make difficult thank provide anything less substandard program like sap unfortunately program live reputation	Negative	Google Play Store	1	1	0
Google Play Store	809b7d25-d855-4ad5-a0c3-0f2225635efc	The latest update does not log in to the account as soon as the code or fingerprint is entered, it locks.	مرتضى زواد	##########			0	ar	us		1	ar	late update log account soon code fingerprint enter lock	Negative	Google Play Store	0	1	0
Google Play Store	6b0b9910-b366-4e68-9bb9-7a21a2557f0e	dfgdsg	brhom aldo	2023-04-08 05:56:00			0	ar	us		5	ar	dfgdsg	Neutral	Google Play Store	0	0	0
Google Play Store	1dbf1542-dfdc-4d24-8496-079b6d0da048	When recharging the mobile balance, you can only do it with amounts of 100 or more. This used to be a bad service, as you could recharge with amounts of 20 or more. I hope we can retrieve this service. 👍🏻	cofee77	##########			0	ar	us		3	ar	recharge mobile balance amount use bad service could recharge amount hope retrieve service	Negative	Google Play Store	1	1	0
Google Play Store	8bd6c82d-90dc-4a4e-a6c0-a4a4f096b443	The latest update keeps suddenly kicking me out. I hope the problem gets resolved.	joseph _s	##########			1	ar	us		4	ar	late update keep suddenly kick hope problem get resolve	Negative	Google Play Store	0	1	0
Google Play Store	43717a7d-dd90-4402-922a-362690c8d947	The new application is not working... please solve the problem.	Abdulaziz Alamoudi	##########			1	ar	us		1	ar	new application work please solve problem	Negative	Google Play Store	0	1	0
Google Play Store	68815e93-aa47-46f7-abbb-1c5069d6513c	Excellent	Hatem Arabi	2023-04-07 04:38:00			0	ar	us		5	ar	excellent	Positive	Google Play Store	0	0	0
Google Play Store	f54433e5-eec6-4e4b-9e52-a082d105a4fe	Very bad after the update.	Dream Life	2023-04-07 01:40:00			7	ar	us		1	ar	bad update	Negative	Google Play Store	1	0	0
Google Play Store	6747f9bd-667f-4106-ad50-7c65f8115cb1	I cannot login after receiving the verification code. I have tried multiple times unfortunately.	Wise Enough	##########			7	ar	us		1	ar	login receive verification code try multiple time unfortunately	Negative	Google Play Store	0	1	0
Google Play Store	df7413df-18fd-4e3b-aaaa-089e8657fa29	The worst application I have ever encountered. Every time I enter the application, it sends an error message saying "incorrect code," even though it was sent by SABB Bank 😤😤😤	ابو نايف	##########			0	ar	us		1	ar	bad application ever encounter every time enter application send error message say incorrect code even though send sabb bank	Negative	Google Play Store	1	1	0
Google Play Store	5897b3be-87c5-4716-966a-132ace1ae6ca	Worst bank.	Hussien Sabek	2023-04-04 09:11:00			0	ar	us		1	ar	bad bank	Negative	Google Play Store	1	0	0
Google Play Store	86aa9361-e2be-4bda-a9dd-639b3039c01a	The application is very slow.	RAYAN . BARRAK ™	2023-04-04 07:43:00			0	ar	us		1	ar	application slow	Negative	Google Play Store	0	0	1
Google Play Store	13472848-fe58-4a49-ab21-f6052d348a5c	Very bad and needs to be developed to keep up with other banks. At least add a card details service.	Abdulaziz	##########			1	ar	us		1	ar	bad need develop keep bank least add card detail service	Negative	Google Play Store	1	1	0
Google Play Store	6731c24f-2616-4956-95ca-7903f5937594	Excellent, the best application ever.	Khaled	##########			0	ar	us		5	ar	excellent best application ever	Positive	Google Play Store	0	0	0
Google Play Store	bcaa004a-473a-4df7-a17f-a166566f25ef	The worst application, brother! It has many problems; you open the app and it delays, doesn't open. And if you try to perform any action, it kicks us out of the system. It frustrates and raises the pressure. May Allah protect us from you. We will withdraw the money and go to another bank. It's better, I swear.	Fars 18	##########			0	ar	us		1	ar	bad application brother many problems open app delay doesnt open try perform action kick us system frustrate raise pressure may allah protect us withdraw money go another bank good swear	Negative	Google Play Store	1	1	1
Google Play Store	ca8d64e6-0cf6-4fc1-8406-6e4d1488c722	There is a malfunction in the application. When I enter, it throws me out of the application, and I have tried more than once.	Fatima	##########			1	ar	us		1	ar	malfunction application enter throw application try	Negative	Google Play Store	0	1	0
Google Play Store	256b8976-15a8-46f0-8409-aeb31f27bd6c	An application that is smooth, fast, clear, and I didn't encounter any problems with it.	خالد محمد	##########			1	ar	us		4	ar	application smooth fast clear didnt encounter problems	Positive	Google Play Store	1	1	1
Google Play Store	f79bfa1d-1ca0-4b5e-81b6-2487b9f471fc	If you are creating an account in the application, you enter all your information and on the last page it says that it is not possible to open the account at the moment. Well, it's too early.	Mohammed Oraini	##########			0	ar	us		1	ar	create account application enter information last page say possible open account moment well early	Negative	Google Play Store	0	1	0
Google Play Store	64af153b-c222-460d-b076-64041f2e2095	Beautiful	محمد الجابري	##########			0	ar	us		5	ar	beautiful	Positive	Google Play Store	0	0	0
Google Play Store	b5575c3c-1616-4b11-8ab9-32f0f4608718	He criticizes a lot and the worst program of a bank I have known. May God bless the days of the first bank.	Mohd Alonazi	##########			0	ar	us		1	ar	criticize lot bad program bank know may god bless days first bank	Negative	Google Play Store	1	0	0
Google Play Store	05c6d345-1b9c-483e-b94a-a7597e005199	The worst application, no excellent customer service, the app doesn't work, it has many malfunctions, lagging, and frequent crashes, and it frequently exits the application.	SAM	##########			1	ar	us		1	ar	bad application excellent customer service app doesnt work many malfunction lag frequent crash frequently exit application	Negative	Google Play Store	1	1	1
Google Play Store	9b355421-f32a-47dd-8d6f-159cc5d04106	Excellent	خالد الحربي	##########			0	ar	us		1	ar	excellent	Positive	Google Play Store	0	0	0
Google Play Store	62ba30c8-b4a5-450a-a2e0-65ca7c96c289	"The bank is good and better than Al Rajhi and others."	ابو نايف المالكي	##########			3	ar	us		5	ar	bank good good al rajhi others	Positive	Google Play Store	0	0	0
Google Play Store	a8d298ee-b7e2-4449-b644-b23c2732e11e	The stupid feature of forcing me to activate location when entering the application. And add the digital card in the application from the same banks as the others.	Ahmed Alsuliman	##########			1	ar	us		1	ar	stupid feature force activate location enter application add digital card application bank others	Negative	Google Play Store	1	1	0
Google Play Store	74ef130e-0898-4522-8ce8-80e0e4f2b906	My experience with this account is excellent and very helpful in transferring and receiving money. It saved us from going to the banks and dealing with tasks and congestion.	Amer Alghamdi	##########			0	ar	us		5	ar	experience account excellent helpful transfer receive money save us go bank deal task congestion	Positive	Google Play Store	0	1	0
Google Play Store	e3a08e9a-6d42-4a2d-9c5c-2f0928eae519	Wonderful	abu nasser	##########			0	ar	us		5	ar	wonderful	Positive	Google Play Store	0	0	0
Google Play Store	7f04b241-3821-4f10-9767-7191ae93bd77	The best application for digital banking.	Wesam Gusti	##########			0	ar	us		5	ar	best application digital bank	Positive	Google Play Store	0	0	0
Google Play Store	3830a115-d472-44cb-861b-f9635335eb0f	The application does not open for me and it tells me there is a technical problem?!	H E	##########			0	ar	us		1	ar	application open tell technical problem	Negative	Google Play Store	0	1	0
Google Play Store	ecacc88b-edd2-422f-a28a-0dfd2cb1d442	Unfortunately, the application and customer service are very slow. At least it takes 25 minutes for someone to respond to you.	حسين علي	##########			1	ar	us		1	ar	unfortunately application customer service slow least take minutes someone respond	Negative	Google Play Store	1	0	1
Google Play Store	c6d04218-53ee-4a56-96e3-9ee63a586745	Excellent and very easy to use.	Kumail	##########			0	ar	us		5	ar	excellent easy use	Positive	Google Play Store	0	0	0
Google Play Store	f34c35c8-f327-4162-a44c-98a689c3a4a9	The application crashes, doesn't open, and is very boring.	الشفق الاحمر	##########			1	ar	us		1	ar	application crash doesnt open bore	Negative	Google Play Store	1	1	0
Google Play Store	e54ba0c7-d7fd-4faf-b7bc-340766946c2c	Distinct and fast-response application.	Abdulrahman Seif	##########			0	ar	us		5	ar	distinct fastresponse application	Positive	Google Play Store	0	0	0
Google Play Store	efa1c2d9-441c-4a02-8b95-99c859a91487	Very beautiful	mix Everyday	##########			0	ar	us		3	ar	beautiful	Positive	Google Play Store	0	0	0
Google Play Store	f7626e1f-f756-4a11-8cd9-5366cae4e75f	"The application is very bad, I have been unable to access it for more than a month."	Sami Mohammed	##########			0	ar	us		1	ar	application bad unable access month	Negative	Google Play Store	1	1	0
Google Play Store	5b272aea-1e03-44c4-92d3-855ba90d5d71	We are currently closing all accounts, and you only deserve half a star for your poor service and constant updates. The problem is that you impose fines on us, while you are the ones responsible for the delays. We are in the process of transferring to another bank and redirecting our salary.	ƒคຖŤคŞŤiȻ F.T.T	##########			0	ar	us		1	ar	currently close account deserve half star poor service constant update problem impose fin us ones responsible delay process transfer another bank redirect salary	Negative	Google Play Store	1	0	0
Google Play Store	bd518fd9-eae9-4876-82df-935ffa3786e1	The application is really sluggish, it doesn't open.	ابو فهد	##########			0	ar	us		1	ar	application really sluggish doesnt open	Negative	Google Play Store	1	1	0
Google Play Store	906828f8-76cf-41b8-a857-823760c59b0b	It has been over a month since I have been unable to access the application. It opens and accepts my fingerprint for just one second and then disappears, forcibly closing. I don't know what the solution is, please clarify.	Abdullah alazzani AL YEMAN	##########			0	ar	us		3	ar	month since unable access application open accept fingerprint one second disappear forcibly close dont know solution please clarify	Negative	Google Play Store	0	1	0
Google Play Store	885d2aa2-10d1-4643-9fb5-cd11760361c8	The application is very very very bad after the latest update. I cannot access the app, it automatically logs out after fingerprint registration. The interface has become long and boring. 👎👎👎	amr abdelftah	##########			39	ar	us		5	ar	application bad late update access app automatically log fingerprint registration interface become long bore	Negative	Google Play Store	1	0	0
Google Play Store	0fb07ba9-36ab-4025-80eb-b06d6b6b324c	The application has become very, very, very bad and the services are poor. International transfers are extremely difficult and unfortunately the services are terrible. We regret opening an account with this terrible bank.	معرض بدر منصور الرشيدي	##########			1	ar	us		1	ar	application become bad service poor international transfer extremely difficult unfortunately service terrible regret open account terrible bank	Negative	Google Play Store	1	1	0
Google Play Store	94a82efb-dc38-4a59-850d-71369544966a	The application closes immediately by itself.	طماح الحربي	##########			0	ar	us		1	ar	application close immediately	Neutral	Google Play Store	0	1	0
Google Play Store	8b56eb13-8a9f-493a-b39f-008b705d9b3b	Every time I enter the application, it shuts down and exits. I am unable to benefit from it like before.	Ayman Allaf	##########			0	ar	us		1	ar	every time enter application shut exit unable benefit like	Negative	Google Play Store	0	1	0
Google Play Store	0f64f134-bb71-4214-bf9c-58b5bfea8f51	The application has become very bad.	abo yosef	##########			0	ar	us		1	ar	application become bad	Negative	Google Play Store	1	0	0
Google Play Store	c9c31ddd-61c7-4121-8e31-11be1f7377c9	The application works if the application language is English, as it automatically closes if it is Arabic.	Khaled Hassan	##########			0	ar	us		5	ar	application work application language english automatically close arabic	Neutral	Google Play Store	0	1	0
Google Play Store	8be2bcd4-cfcd-4a85-b0ff-6d5012aac1e3	The application has become very very bad after the latest update. Is it possible that you don't read people's comments? Everyone is complaining that the app doesn't work, it just opens and closes immediately without any reason. This issue has been going on without any solution from your side, which reflects negatively on the rating of your program and your services in general... We kindly request…	Ra Ar	2023-03-08 04:55:00			59	ar	us		1	ar	application become bad late update possible dont read people comment everyone complain app doesnt work open close immediately without reason issue go without solution side reflect negatively rat program service general kindly request expedite resolve issue take consideration bank applications work good provide good service	Negative	Google Play Store	1	1	0
Google Play Store	b50ee2c3-3887-434f-a56c-44e58e68eaeb	Very excellent	Abdulwahed Mohamed	2023-03-08 04:48:00			0	ar	us		5	ar	excellent	Positive	Google Play Store	0	0	0
Google Play Store	1418f473-b424-4026-866a-857cdde2e4eb	Unfortunately, the application is very, very bad. You will regret opening an account in SABB Bank and its application does not serve you. You cannot access it and I hope that this problem will be improved and fixed.	عائض النقيب	2023-03-08 02:22:00			1	ar	us		1	ar	unfortunately application bad regret open account sabb bank application serve access hope problem improve fix	Negative	Google Play Store	1	1	0
Google Play Store	23a14561-4c23-4c98-a7d6-29e32054c76b	The application has become boring and you cannot access it at the fingerprint stage after the latest update. It takes a long time to wait and without any benefit. Please fix the problem as soon as possible.	احمد	##########			58	ar	us		1	ar	application become bore access fingerprint stage late update take long time wait without benefit please fix problem soon possible	Negative	Google Play Store	1	1	1
Google Play Store	276b2b6d-614a-4ead-b971-7d365ba952e7	Very bad application, it automatically logs out when logging in.	MOHAMED ABOYOUSEF	##########			2	ar	us		1	ar	bad application automatically log log	Negative	Google Play Store	1	1	0
Google Play Store	aa8637b6-1bdd-435a-9410-9eb9ed25331f	After logging into the application, it keeps showing me an issue. Can you help me solve the problem?	Mohd Munajed	##########			0	ar	us		1	ar	log application keep show issue help solve problem	Negative	Google Play Store	0	1	0
Google Play Store	56af6e9e-b036-4f37-8689-8d4ba8d161fc	Thank you. But for two days, I have been unable to register my information on the mobile.	ramadan darmo	##########			0	ar	us		5	ar	thank two days unable register information mobile	Neutral	Google Play Store	0	1	0
Google Play Store	f9515d8e-e914-431d-9bd9-fb1291f8c752	When opening the application, it immediately exits and the application is very bad, and it is not possible to access the services.	reda fadel	2023-03-07 09:44:00			3	ar	us		1	ar	open application immediately exit application bad possible access service	Negative	Google Play Store	1	1	0
Google Play Store	1c7dc9ba-46c8-4a4e-9d8b-e82c5c6c61c3	The application is very bad. I am unable to log in. Every time I try to access the application, it exits. Other banks have very good services. That's why I will cancel my account with this bank.	hazzom farouk	2023-03-07 06:47:00			1	ar	us		1	ar	application bad unable log every time try access application exit bank good service thats cancel account bank	Negative	Google Play Store	1	1	0
Google Play Store	32b7c9d1-5e41-410c-b656-d8621fcd7e9a	Not qualified for use	OMAR Alhsaisi	##########			0	ar	us		1	ar	qualify use	Negative	Google Play Store	0	1	0
Google Play Store	17738170-be8d-4e92-ac19-3642badaf76f	Very slow	Hany Farghaly	##########			1	ar	us		3	ar	slow	Negative	Google Play Store	0	0	1
Google Play Store	c5a2fc8f-278f-49f4-9b12-6b150308e44c	Good	Yousif Mohammed	2023-03-06 03:02:00			0	ar	us		4	ar	good	Positive	Google Play Store	0	0	0
Google Play Store	5168600c-3366-4ebc-94fe-e3ed82ba3efe	Very, very good.	Sayedelhussein Nouri	##########			0	ar	us		5	ar	good	Positive	Google Play Store	0	0	0
Google Play Store	0684aee9-7d2f-46cc-a60f-3dd25609ec7f	The application is slow and exits automatically, and it never works properly!!!	Ahmad Mansour	##########			1	ar	us		1	ar	application slow exit automatically never work properly	Negative	Google Play Store	0	1	1
Google Play Store	e8aa7c0f-2a8c-49c3-b502-2e6020e12ff0	The application is not working for a while.	meriem soso	2023-03-05 09:17:00			1	ar	us		2	ar	application work	Negative	Google Play Store	0	1	0
Google Play Store	0237bd55-e5c9-473d-82e9-2a9bf233376e	The application has become unbearable. Every time I open it, it crashes. I have deleted the application multiple times and reinstalled it, but the same problem persists. It only opens once or a few times, then crashes again. Please help me.	Okba	2023-03-05 07:36:00			3	ar	us		1	ar	application become unbearable every time open crash delete application multiple time reinstall problem persist open time crash please help	Negative	Google Play Store	1	1	0
Google Play Store	1a6bdbeb-3ce8-441f-8cd0-8546fe9d20fa	The application is very bad after the last update. It just opens and then closes afterwards.	Elnazer Soft	2023-03-05 04:59:00			0	ar	us		1	ar	application bad last update open close afterwards	Negative	Google Play Store	1	1	0
Google Play Store	a1c1c5e9-f738-4f5e-93c7-0f49aa19c3aa	Excellent and useful ✴️✴️✴️✴️✴️	Reyadh BN Rashd	2023-03-05 01:14:00			0	ar	us		5	ar	excellent useful	Positive	Google Play Store	0	0	0
Google Play Store	2f3d698d-5e39-4fd8-a1fd-b669ba277564	Unfortunately, the website is very bad now. I cannot log in, it automatically logs me out.	saad Al3nzee	2023-03-05 00:35:00			1	ar	us		1	ar	unfortunately website bad log automatically log	Negative	Google Play Store	1	1	0
Google Play Store	3d23313a-a141-4a8e-b0ea-2ddd794bbd5c	The app used to be good, but now it's very bad after the last update. Every time I open the app, it crashes immediately. I have tried doing this several times, but I always face the same issue. I can't catch a glimpse of anything.	Mostafa Magdy	##########			1	ar	us		1	ar	app use good bad last update every time open app crash immediately try several time always face issue cant catch glimpse anything	Negative	Google Play Store	1	1	0
Google Play Store	888b87f4-f602-431f-87f6-ff3e6c8f7da0	Please maintain the application.	يوسف ناجي	##########			1	ar	us		1	ar	please maintain application	Neutral	Google Play Store	1	0	0
Google Play Store	70a7b2a4-f9bb-4268-a057-b1940a7416b2	Hello, every time I enter the application, it automatically exits. Please respond to the problem. Thank you.	alaa ayoub	##########			1	ar	us		1	ar	hello every time enter application automatically exit please respond problem thank	Negative	Google Play Store	0	1	0
Google Play Store	2e0b67e9-861f-4927-96ca-277a9788a528	"A poorly designed application that needs to be reviewed."	Ebrahem Ezzat	##########			1	ar	us		1	ar	poorly design application need review	Negative	Google Play Store	1	0	0
Google Play Store	748d17b8-6cfd-4ff3-9c90-b14f9e7e50a7	The application is bad after the latest update, as I cannot access my account. It automatically logs me out after entering the verification code. Please address this issue as we are in urgent need of the application to carry out our financial transactions.	Habib Al-habib	##########			7	ar	us		1	ar	application bad late update access account automatically log enter verification code please address issue urgent need application carry financial transactions	Negative	Google Play Store	1	1	0
Google Play Store	0aec174f-432b-48ca-9631-7c5101f1609c	Every time we enter the app, it automatically logs us out... Worst app! And when I went to the bank, the employee told me to change the name on my residence permit for an update... Worst app and worst bank!	Amr Salam	##########			1	ar	us		1	ar	every time enter app automatically log us bad app go bank employee tell change name residence permit update bad app bad bank	Negative	Google Play Store	1	1	0
Google Play Store	1503aee0-a823-4736-8738-30235f457ddc	The application is not working and is very bad.	hustler gain	##########			1	ar	us		1	ar	application work bad	Negative	Google Play Store	1	1	0
Google Play Store	8174b0f8-8319-478a-8b33-d57d23615623	The latest update is very, very, very bad... The quick login code and fingerprint always malfunction... We kindly request a solution to the problem.	نور المبتسم	##########			5	ar	us		1	ar	late update bad quick login code fingerprint always malfunction kindly request solution problem	Negative	Google Play Store	1	1	0
Google Play Store	668e2360-ab2c-47a2-9fe5-75b3ff62a69d	The application is not working.	Mahmoud hrtani	##########			1	ar	us		1	ar	application work	Negative	Google Play Store	0	1	0
Google Play Store	e78e83fe-4242-42be-8987-fafa536b267b	The application is useless as it accepts once and rejects 20 times.	عبده حسن	##########			9	ar	us		1	ar	application useless accept reject time	Negative	Google Play Store	1	1	1
Google Play Store	261a5a30-3ee2-4d80-b08a-251ef69e63d1	The program does not open.	محمد عبد المعطى	2023-03-02 09:37:00			1	ar	us		1	ar	program open	Neutral	Google Play Store	0	1	0
Google Play Store	8c2d86a9-68b7-4c9c-9a9b-30ed6c172211	The application crashes every time I open it, and it automatically logs me out. Please solve the problem and follow up on customer feedback.	محمد علي	2023-03-02 08:39:00			1	ar	us		1	ar	application crash every time open automatically log please solve problem follow customer feedback	Negative	Google Play Store	0	1	0
Google Play Store	287d28ab-d32f-40a9-8095-1febbce7ed6c	A bad program, every time you register in it, it logs you out and closes.	محمد باعشن	2023-03-02 07:37:00			1	ar	us		1	ar	bad program every time register log close	Negative	Google Play Store	1	1	0
Google Play Store	b6eb7c0c-6fdc-47a7-bb01-7e2d87b467ac	After the last update, it is very very bad.	Gamal Haggag	2023-03-02 05:40:00			1	ar	us		1	ar	last update bad	Negative	Google Play Store	1	0	0
Google Play Store	4d2fd93d-5858-4dce-b332-206b9da27781	The application is bad after the latest update, it does not open. I hope the problem is solved as soon as possible.	ابو حربي	2023-03-02 03:54:00			1	ar	us		1	ar	application bad late update open hope problem solve soon possible	Negative	Google Play Store	1	1	0
Google Play Store	f99f0a2b-2ed7-4a5a-9ce4-7139e8ec2122	It's okay, I exited the application unintentionally.	ADEL Ahmed	##########			0	ar	us		5	ar	okay exit application unintentionally	Neutral	Google Play Store	1	1	0
Google Play Store	34f5575a-ce0c-4714-bf7c-a4cd7d88aef0	The application has many problems, and it even crashes/exits you out of the application.	منصور خالد الظاهر	##########			1	ar	us		1	ar	application many problems even crashesexits application	Negative	Google Play Store	0	1	0
Google Play Store	0962a3f9-28cd-4fee-b8dc-194980c34edc	Every time I enter, it forces me to update. What is this update, people? Have mercy on us from unnecessary updates.	عيسى الجوهر	##########			1	ar	us		1	ar	every time enter force update update people mercy us unnecessary update	Negative	Google Play Store	1	0	0
Google Play Store	abafc45d-58b2-4cd4-9bf1-3a67a4c67560	The application does not open, and when I try to log in, it closes by itself.	Mohamed Ammar	##########			1	ar	us		1	ar	application open try log close	Negative	Google Play Store	0	1	0
Google Play Store	81325827-1e5f-45e4-9ea5-d9de3a012c99	The application is very bad after the latest update. Every time I enter the application, it kicks me out.	Rami Mohmmed	##########			1	ar	us		1	ar	application bad late update every time enter application kick	Negative	Google Play Store	1	1	0
Google Play Store	5ef39854-6207-4b48-a1a6-d42d8c8bc843	The new update is extremely bad. As soon as we enter the username and login, the program immediately shuts down.	Mohamed Taha	##########			1	ar	us		1	ar	new update extremely bad soon enter username login program immediately shut	Negative	Google Play Store	1	1	0
Google Play Store	bc1a81e6-f8c8-4bc3-93aa-4fe96b838b99	the worst and doesn't work/open.	رقية مجدي سويدان	##########			1	ar	us		1	ar	bad doesnt workopen	Negative	Google Play Store	1	1	0
Google Play Store	3b7910d1-4ec9-4bd7-8c56-4b30345b4e44	"There is a problem in the application, it keeps logging you out repeatedly."	رمزي العشاري	2023-03-01 08:27:00			1	ar	us		1	ar	problem application keep log repeatedly	Negative	Google Play Store	0	1	0
Google Play Store	499edc4a-347c-4405-afcc-b4b9eeba85a5	I cannot access the application, as soon as I enter the website, the page closes. Please solve the problem as soon as possible, it is important. Thank you.	do7a88	2023-03-01 04:02:00			1	ar	us		1	ar	access application soon enter website page close please solve problem soon possible important thank	Negative	Google Play Store	0	1	0
Google Play Store	f7a4366a-2232-4de2-8dcb-a40410829828	Welcome.. There is a problem with logging in. After entering the application, it immediately returns an error. Please solve this problem. Thank you. We repeat and request a solution to the problem...	Adam Insan	##########			4	ar	us		2	ar	welcome problem log enter application immediately return error please solve problem thank repeat request solution problem	Negative	Google Play Store	0	1	0
Google Play Store	e5267663-b03e-4d9b-af41-fd3253dca7bd	Peace be upon you and the mercy and blessings of Allah. Every time I enter the application, it automatically exits. Please fix the problem.	يارب لك الحمد	##########			1	ar	us		1	ar	peace upon mercy blessings allah every time enter application automatically exit please fix problem	Neutral	Google Play Store	0	1	0
Google Play Store	461a3451-f674-4139-8b29-f0c014ff1bdc	Splendor	okba11 okbaa	##########			0	ar	us		5	ar	splendor	Positive	Google Play Store	0	0	0
Google Play Store	1ec89007-f1f0-467a-8a89-baa919c3a9ba	The application has become very annoying. Every time I open the app, it kicks me out. I have done all the updates for my device, but the same problem persists. I will stop using it.	mohamed salah	##########			1	ar	us		1	ar	application become annoy every time open app kick do update device problem persist stop use	Negative	Google Play Store	1	1	0
Google Play Store	0ff86b89-3b23-4347-bb4c-6fd56d2e1601	It quickly lifts me up, opens and closes quickly, it's good.	khalid alwrgy	##########			1	ar	us		1	ar	quickly lift open close quickly good	Positive	Google Play Store	0	0	0
Google Play Store	d3b66377-0cd3-43d0-8bbd-9d037f6a7208	The worst app never opens. If there was an option to give it less than one star, I would have done so.	TURKI SAJAA	##########			1	ar	us		1	ar	bad app never open option give less one star would do	Negative	Google Play Store	1	1	0
Google Play Store	98887bb5-2bcb-431c-b110-673fcc49fb25	Excellent and easy-to-use application, and the services provided by Saudi British Bank to customers are more than fantastic. The bank employees are friendly and cheerful, and the phone banking customer service is also excellent. Thanks to all the workers for their efforts in providing better service.	mubarak AL-Dossary	##########			0	ar	us		5	ar	excellent easytouse application service provide saudi british bank customers fantastic bank employees friendly cheerful phone bank customer service also excellent thank workers efforts provide good service	Positive	Google Play Store	0	0	0
Google Play Store	f9c557c6-0cd3-499a-a835-6d0aad25724d	"Can someone help me? My Android phone and its application are only a week old, but every time I open it, it automatically stops."	Hossameldin Habib	##########			1	ar	us		3	ar	someone help android phone application week old every time open automatically stop	Negative	Google Play Store	0	1	0
Google Play Store	e30f0a09-b291-4037-bd68-fbded5f497aa	Every time I enter the mobile application, it immediately exits after entering, despite having deleted the application and downloaded it again, and the problem persists.	Zaher Shishackli	##########			14	ar	us		1	ar	every time enter mobile application immediately exit enter despite delete application download problem persist	Negative	Google Play Store	0	1	0
Google Play Store	8aa52dac-853a-4507-90d6-6a17de8eedd8	"The application is there, but when I enter it, it immediately exits and closes. There must be a solution, brothers. Please help."	نزار نزار	##########			0	ar	us		1	ar	application enter immediately exit close must solution brothers please help	Negative	Google Play Store	0	1	0
Google Play Store	c7788451-fcf7-49b2-b173-75938cea2329	The application was good, but now it automatically logs me out of the app.	محمد الصباغ	##########			0	ar	us		1	ar	application good automatically log app	Negative	Google Play Store	0	1	0
Google Play Store	5f328f83-a8e7-4003-8dd4-4c7f1a157e9e	The application always logs me out.. What's the reason??!!	Jeja Store13	##########			0	ar	us		1	ar	application always log whats reason	Negative	Google Play Store	0	1	0
Google Play Store	a654a68f-738f-476c-aaa4-2e48014760fd	The application has become very bad, it exits automatically.	Nagla Abuelfatah	##########			0	ar	us		1	ar	application become bad exit automatically	Negative	Google Play Store	1	1	0
Google Play Store	e9748c97-b74d-494a-aaff-b467cbb8f88d	The application is not working. Please fix it as it will cause difficulty in dealing with the clients.	Alaa Shahin	##########			0	ar	us		1	ar	application work please fix cause difficulty deal clients	Negative	Google Play Store	1	1	1
Google Play Store	cb15e98e-b6ec-4553-b469-3dae531f8517	There have been frequent crashes recently after entering the application, causing you to exit immediately and the application to close.	Maryam Almalki	##########			3	ar	us		1	ar	frequent crash recently enter application cause exit immediately application close	Negative	Google Play Store	0	1	0
Google Play Store	8fdaff3e-0f46-40c0-83fe-0967b8c5fdcb	Very very bad and their program is as messed up as their brains 😁	abdulaziiz Basaad	##########			0	ar	us		1	ar	bad program mess brain	Negative	Google Play Store	1	0	0
Google Play Store	6986842f-d847-49bf-82ea-fd21f4f21a4c	The application is very bad, it closes and sometimes freezes.	Amin Alawadi	##########			0	ar	us		1	ar	application bad close sometimes freeze	Negative	Google Play Store	1	0	1
Google Play Store	054e76a1-d730-4282-8d5e-345813c08bb1	Very bad, especially when the salary is low.	إلى جنة الخلد ياأمي ختام	##########			0	ar	us		1	ar	bad especially salary low	Negative	Google Play Store	1	0	0
Google Play Store	d14f7928-ca71-418a-bbfc-a2961412712b	Why do you force us to activate the website? What concern do you have in my website? You claim it is for security, but that's a lie.	Hanan 222	##########			0	ar	us		1	ar	force us activate website concern website claim security thats lie	Negative	Google Play Store	1	1	0
Google Play Store	0a7f788e-b517-4dae-b87e-45c9cc368678	It suddenly exits you from the application.	Abdulruof Jabali	##########			0	ar	us		1	ar	suddenly exit application	Neutral	Google Play Store	0	1	0
Google Play Store	cd76130f-2ea7-4b61-9af6-cab3e0485e0e	The application has a problem, it crashes immediately after logging in. Please find a solution before the salaries are released.	Suroor Alqahtani	##########			0	ar	us		1	ar	application problem crash immediately log please find solution salaries release	Negative	Google Play Store	0	1	0
Google Play Store	b6a88cb6-511f-4874-a96c-01c13be5bad0	The application is bad, bad, bad.	mohammed shehata	##########			0	ar	us		1	ar	application bad bad bad	Negative	Google Play Store	1	0	0
Google Play Store	04bf8f9b-b0fb-4a8f-8537-48e6c26957c8	I enter the application 4 times and it closes by itself. It has been like this for two months.	محمد الحاجي	##########			0	ar	us		1	ar	enter application time close like two months	Negative	Google Play Store	1	0	0
Google Play Store	7d5fe229-46cc-41d5-b7f6-109440cd70a3	The application, whenever I enter it, keeps showing me that there is a problem.	سعد الزهراني	##########			0	ar	us		1	ar	application whenever enter keep show problem	Negative	Google Play Store	0	1	0
Google Play Store	3b9dfb7d-e47f-4b44-875c-14139549a4c0	The application is not working well. After logging in, the user is immediately logged out. The app has been deleted and reinstalled multiple times without any benefit.	abdulaziz binmanee	##########			0	ar	us		1	ar	application work well log user immediately log app delete reinstall multiple time without benefit	Negative	Google Play Store	0	1	0
Google Play Store	6dd1fb47-d9bb-42b5-9e71-f84fddb42ca0	The application is bad, is there anyone who can help? I haven't been able to log in for three days, is there anyone who can help, Arab people?	Ali Ms	##########			0	ar	us		1	ar	application bad anyone help havent able log three days anyone help arab people	Negative	Google Play Store	1	1	0
Google Play Store	58425b92-cea9-43f0-b945-d3d030759217	Now, every time I enter the application and log in, it opens but only for a few seconds before automatically logging out of the application. I have tried several times to log in again but to no avail.	انور النقيب	##########			0	ar	us		1	ar	every time enter application log open second automatically log application try several time log avail	Negative	Google Play Store	0	1	0
Google Play Store	cda70609-329f-4aa5-89dd-f244b8cc436e	The worst app doesn't open until after twenty attempts and may not open at all.	nisreen farsi	##########			1	ar	us		1	ar	bad app doesnt open twenty attempt may open	Negative	Google Play Store	1	1	0
Google Play Store	5c47fa5d-cbb0-4756-917d-243472fe3d18	The latest update is very bad, every time I enter, it automatically logs me out of the application.	Sultan Saber	##########			3	ar	us		1	ar	late update bad every time enter automatically log application	Negative	Google Play Store	1	1	0
Google Play Store	c68c3774-199a-470b-aebf-bb4f3c04daf6	Very bad, every time I open the program and enter it, it automatically logs me out immediately.	باسم الدبعي	##########			1	ar	us		1	ar	bad every time open program enter automatically log immediately	Negative	Google Play Store	1	1	0
Google Play Store	5587e93f-0a4a-4b4d-a52e-caf98e80f7fd	The application is crashing frequently.	Rasha Kamal	##########			1	ar	us		1	ar	application crash frequently	Negative	Google Play Store	0	1	0
Google Play Store	6961f51d-596a-4818-88c4-8d3b9c8202c9	The recent SAP program is malfunctioning. Every time I enter the program, it exits on its own. Please solve this problem, as many people are suffering from it.	Rayen Ahmed	##########			0	ar	us		1	ar	recent sap program malfunction every time enter program exit please solve problem many people suffer	Negative	Google Play Store	0	1	0
Google Play Store	ecd41328-90c8-4b2b-a733-31343026c96b	Good	hadi ali	##########			0	ar	us		5	ar	good	Positive	Google Play Store	0	0	0
Google Play Store	e389ce3e-6f20-4928-8d27-1ebb1524361f	The application is very bad, it only allows access for a few seconds.	AHMAD ALGHAREB	##########			0	ar	us		1	ar	application bad allow access second	Negative	Google Play Store	1	1	0
Google Play Store	680d2ace-5288-4e7e-b7be-415e7a087b36	Even a big star like this application and such customer service... in urgent cases, we need to transfer money and the application refuses to transfer!! The bank's website also refuses to transfer!!! It is difficult to transfer from ATMs to beneficiaries!!!!! Are these deliberate actions to retain depositors' money???? I will close my account with you at the earliest opportunity.	Fresh House	##########			0	ar	us		1	ar	even big star like application customer service urgent case need transfer money application refuse transfer bank website also refuse transfer difficult transfer atms beneficiaries deliberate action retain depositors money close account early opportunity	Negative	Google Play Store	1	0	0
Google Play Store	b1c2a384-24a1-461a-9b0b-5b06eb29880c	The application is very bad. Every time I enter, it crashes immediately. Please solve the problem as soon as possible.	Mohammed Turkmani	##########			1	ar	us		1	ar	application bad every time enter crash immediately please solve problem soon possible	Negative	Google Play Store	1	1	1
Google Play Store	d7c68abd-3978-4786-8858-468c5e2e2cbe	I'm really sorry, I can't access since a month.	a.b.n ali	##########			0	ar	us		1	ar	im really sorry cant access since month	Negative	Google Play Store	0	1	0
Google Play Store	6e3ff54f-5709-48ae-bfff-723f46e7019e	There is a problem with the application, it suddenly stops when trying to login.	محمد ناصر	##########			1	ar	us		3	ar	problem application suddenly stop try login	Negative	Google Play Store	0	1	0
Google Play Store	17ed8db5-d300-4ef8-a376-b82c0c4ced99	He does not log in, and then there is another problem he does not receive OTP. The Rajhi application is bad, unlike yours, and there are never any problems. The OTP is always delayed or never received at all.	F. Mor	##########			1	ar	us		1	ar	log another problem receive otp rajhi application bad unlike never problems otp always delay never receive	Negative	Google Play Store	1	0	1
Google Play Store	1591d5aa-0812-4a95-980d-75379acf5316	The application is considered the worst bank application I have ever used in my life. It automatically logs you out and doesn't help you at all.	Fahd Ahmed	##########			0	ar	us		1	ar	application consider bad bank application ever use life automatically log doesnt help	Negative	Google Play Store	1	1	0
Google Play Store	13e80813-ec2c-46ec-95e4-9808e38f77b1	Something strange, the bank application is not working. Every time I try to login, it immediately kicks me out. Please find a solution for this terrible application.	kaid dody	##########			0	ar	us		1	ar	something strange bank application work every time try login immediately kick please find solution terrible application	Negative	Google Play Store	1	1	0
Google Play Store	212f2ad9-9edf-4b05-a065-9f27df2144bc	This translates to: "Ringside, he became unbearable; every time he enters, he brings me out."	سر الحياة	##########			0	ar	us		1	ar	translate ringside become unbearable every time enter bring	Negative	Google Play Store	1	0	0
Google Play Store	17b79622-9df6-4d38-950e-eb1cead1c0f9	Peace be upon you and the mercy and blessings of Allah. I would like to inform you that whenever I open the SABB Mobile application, I am automatically logged out of the application. I have already deleted the application and reinstalled it again, and I have also updated my device and restarted it, but to no avail. I kindly request your assistance. Thank you.	Khalil Ashour	##########			134	ar	us		1	ar	peace upon mercy blessings allah would like inform whenever open sabb mobile application automatically log application already delete application reinstall also update device restart avail kindly request assistance thank	Neutral	Google Play Store	0	1	0
Google Play Store	ff092297-c3e2-4395-943f-d8f444b964ec	The application is very bad, it never opens.	mahmoud bassam	##########			0	ar	us		1	ar	application bad never open	Negative	Google Play Store	1	1	0
Google Play Store	6d1df943-c367-4727-b97d-348d2336e2ac	First time I encounter such a terrible bank application, it's really awful. I open it and close it three times, we are just playing here.	Hossam Mai	##########			0	ar	us		1	ar	first time encounter terrible bank application really awful open close three time play	Negative	Google Play Store	1	0	0
Google Play Store	2e862559-e071-4501-9d1d-81574d0ee8ad	The application is very bad, unstable, and has been so for over a month. I have been suffering, especially after its recent update.	Salem Bahormoz	##########			0	ar	us		1	ar	application bad unstable month suffer especially recent update	Negative	Google Play Store	1	1	0
Google Play Store	6140b8a6-7f8e-47ae-82bf-dab233fa82ea	Every time I log in, the program automatically shuts down. Please fix the problem.	mahmoud khalil	##########			6	ar	us		1	ar	every time log program automatically shut please fix problem	Negative	Google Play Store	0	1	0
Google Play Store	5acc030c-8b4a-421b-a60f-599065e9d21a	I experienced a terrible bank dealing that involved procrastination and significant delays in transactions.	ابن الطائف	##########			0	ar	us		1	ar	experience terrible bank deal involve procrastination significant delay transactions	Negative	Google Play Store	1	0	1
Google Play Store	ecdb443e-b13e-4b45-9e4b-ba5938181d16	"He has been suspended for over a month, and I don't know how to access my account."	أحمد الحفني	##########			0	ar	us		1	ar	suspend month dont know access account	Negative	Google Play Store	0	0	1
Google Play Store	9012f099-7ef6-444a-bd5b-cae03894f694	The program is not working and it exits immediately upon entering the sent code for the mobile number.	issa shibly	##########			0	ar	us		1	ar	program work exit immediately upon enter send code mobile number	Negative	Google Play Store	0	1	0
Google Play Store	9977c5ed-fe3e-48e0-9dae-80608bead4c2	My bank.	A Bukhari	##########			0	ar	us		5	ar	bank	Neutral	Google Play Store	1	0	0
Google Play Store	d6e8de5a-2cd9-48e2-b53a-f90029b8cd5c	The application locks immediately upon logging in. How can I solve the problem?	soso asal	##########			0	ar	us		1	ar	application lock immediately upon log solve problem	Negative	Google Play Store	0	1	0
Google Play Store	065af5ae-bcba-40ed-9b1e-a1b4bae55ea8	"The worst application and bank I have ever seen in my life. I do not recommend dealing with them. The worst part is when you go to the bank and they tell you to contact customer service, and when you call, they send you back to the bank 🤣🤣."	Khider Shamaon	##########			0	ar	us		1	ar	bad application bank ever see life recommend deal bad part go bank tell contact customer service call send back bank	Negative	Google Play Store	1	0	0
Google Play Store	bf2c07bb-fefd-4f11-9501-eba54bad5518	After entering the verification code, it locks automatically.	Mohamed Elsaghir	##########			0	ar	us		1	ar	enter verification code lock automatically	Neutral	Google Play Store	0	1	0
Google Play Store	e702ffee-b761-4af7-a117-1694ebbb6237	The programs are very slow now, when I enter, they exit in a bad way.	Mohamed Hassan	##########			0	ar	us		1	ar	program slow enter exit bad way	Negative	Google Play Store	1	1	1
Google Play Store	7514b37e-ad7d-49af-adab-18eb2765506b	It is difficult and complicated. It differs from banking applications in renewing identity. All banks have the application except this one.	انا هو هو انا	##########			0	ar	us		1	ar	difficult complicate differ bank applications renew identity bank application except one	Neutral	Google Play Store	1	0	0
Google Play Store	c5136278-8dbd-412e-9e55-566391476ad2	The program does not work well 👎👎👎	Mustafa Albrahim	##########			0	ar	us		1	ar	program work well	Negative	Google Play Store	0	1	0
Google Play Store	98f4551d-67c7-4c54-9ff5-1faf0d1fec0b	Every time I enter the program, it automatically exits. The meaning of my new 22-liter mobile is requested. Please provide a solution.	Faisal Bin Gadha	##########			0	ar	us		1	ar	every time enter program automatically exit mean new liter mobile request please provide solution	Negative	Google Play Store	0	1	0
Google Play Store	ca934d64-6504-41d1-ad3d-16288fbf7c4d	I have a problem with the application not opening in Arabic language.	Mahmoud ELSHEHAWY	##########			0	ar	us		5	ar	problem application open arabic language	Negative	Google Play Store	0	1	0
Google Play Store	178e5da2-d213-4008-9ddd-d3597225902c	After the update, it has become useless to enter your data as it kicks you out of the program.	ام سيد علي	##########			0	ar	us		1	ar	update become useless enter data kick program	Negative	Google Play Store	1	1	0
Google Play Store	1c022207-4fc7-4f48-8895-98d1aecdc189	Unable to translate the text. Can you please provide more context or verify the accuracy of the text?	فيصل حمد	##########			0	ar	us		1	ar	unable translate text please provide context verify accuracy text	Negative	Google Play Store	0	1	0
Google Play Store	13be0e83-bbff-4059-8447-d87177adcf75	The application is very, very bad and it closes by itself.	Mostafa Eid	##########			0	ar	us		1	ar	application bad close	Negative	Google Play Store	1	0	0
Google Play Store	b8e4de8c-853c-4ee3-93af-a935d40cb92c	The application, enter it and see if there is a solution for us. I want to pay bills.	يحي الشهري	##########			0	ar	us		1	ar	application enter see solution us want pay bill	Neutral	Google Play Store	0	1	0
Google Play Store	3a7e29a9-a77c-4b76-9f42-3ed42dd84322	The application has been bad for over a week. We hope the problem is resolved.	tv k	##########			1	ar	us		1	ar	application bad week hope problem resolve	Negative	Google Play Store	1	0	0
Google Play Store	ba37ef4b-3a2f-4b4a-b585-77d6c1c0ef6c	Slow and freezes suddenly, and not smooth, dear brothers in SABB bank, customer support department. Don't you see the comments? Please fix and update quickly, if you please.	طارق جاري	##########			0	ar	us		1	ar	slow freeze suddenly smooth dear brothers sabb bank customer support department dont see comment please fix update quickly please	Negative	Google Play Store	0	0	1
Google Play Store	314c7c83-2646-47e2-83f6-6e0d0422021e	Very nice application	Qassim Almubarak	##########			0	ar	us		1	ar	nice application	Positive	Google Play Store	0	0	0
Google Play Store	80c8370c-5870-499e-a4c7-6e353751f0c8	The application is bad and does not work.	anas alsayed	##########			0	ar	us		1	ar	application bad work	Negative	Google Play Store	1	1	0
Google Play Store	6da8ab92-d7f1-4d73-a24b-a27ec35654f7	The application hangs, please fix the application.	عبدالواسع محمدخالد خالد	##########			0	ar	us		1	ar	application hang please fix application	Negative	Google Play Store	0	1	1
Google Play Store	0b9b4f74-ad7d-4f55-a9ef-8bdcd1a2c2f7	It is very difficult to only facilitate the downloading and running of the website from external devices.	ابومنصور ع جوحلي	##########			0	ar	us		5	ar	difficult facilitate download run website external devices	Negative	Google Play Store	1	0	0
Google Play Store	f0eba7e3-34b4-4b17-8f19-e821cb1b573b	The application is not working. It opens for a second and then exits. Also, Subnet does not log in. What should I do?	Mohd Khateib	##########			7	ar	us		1	ar	application work open second exit also subnet log	Negative	Google Play Store	0	1	0
Google Play Store	03cce86c-1281-4277-baa0-fa7ac054f4be	The service is very bad and the application doesn't open, and if it does open, it closes immediately.	Waleed Elshafey	##########			3	ar	us		1	ar	service bad application doesnt open open close immediately	Negative	Google Play Store	1	1	0
Google Play Store	23bfdb59-909a-4709-ba5d-10741c5f9443	A wonderful experience	عبدالباقي ابوخالد	##########			0	ar	us		5	ar	wonderful experience	Positive	Google Play Store	0	0	0
Google Play Store	c02bb267-a372-4499-b145-e8bc8c71e4b8	The application is very bad, every time I enter it, it crashes. Please solve the problem as soon as possible.	Daham Hamood	##########			15	ar	us		1	ar	application bad every time enter crash please solve problem soon possible	Negative	Google Play Store	1	1	0
Google Play Store	81fd0cdb-373e-4ef3-a34a-5cd4eea30aed	Slow and frustrating application.	CHAR IZMA	##########			0	ar	us		1	ar	slow frustrate application	Negative	Google Play Store	1	0	1
Google Play Store	1e4e877a-d39a-45c8-ae5a-e8bd1aa78dbf	The application is not functioning properly.	emad osman	##########			1	ar	us		1	ar	application function properly	Negative	Google Play Store	0	1	0
Google Play Store	86e39c8e-2a10-486f-8e07-cb4e545328d0	Bad experience	Tvv Haier	##########			0	ar	us		1	ar	bad experience	Negative	Google Play Store	1	0	0
Google Play Store	b11610e7-aabb-496f-9a31-1f026ed8b248	Why is it open one day and closed another day?	Ahmad Hakim	##########			0	ar	us		1	ar	open one day close another day	Negative	Google Play Store	1	1	0
Google Play Store	6792b64e-a0d9-4c88-9a4c-b67be9bd574b	The application is very weak.	hisham dawoud	##########			0	ar	us		1	ar	application weak	Negative	Google Play Store	1	0	0
Google Play Store	930c3ede-851c-438b-a3c0-c3e7274b9ac2	The first was very excellent and easy, but now it's not opening. Every time I try to enter, it kicks me out directly. I hope the problem gets resolved.	صلاح الدين المطحني	##########			0	ar	us		1	ar	first excellent easy open every time try enter kick directly hope problem get resolve	Negative	Google Play Store	0	1	0
Google Play Store	0d8e0043-c7eb-4440-8cb4-7bd95a6dca1b	The application exits on its own. Please improve how it handles work.	Eyas Malik	##########			0	ar	us		1	ar	application exit please improve handle work	Negative	Google Play Store	0	1	0
Google Play Store	3285fcfa-7bab-4f87-b385-34842276ac5e	The application is a failure, it closes unexpectedly.	Sayed Sadek	##########			0	ar	us		1	ar	application failure close unexpectedly	Negative	Google Play Store	0	1	0
Google Play Store	9b37c7ac-72e8-492c-8a7f-dcc7febeed35	The application is very bad. Every time I open the application, it crashes.	sharany hassany	##########			0	ar	us		1	ar	application bad every time open application crash	Negative	Google Play Store	1	1	0
Google Play Store	cb558be3-e5b5-42f7-ab37-152d18eb4bc3	"The application has returned very, very, very bad. There is no power nor strength except in Allah."	hamza abosaud	##########			0	ar	us		1	ar	application return bad power strength except allah	Negative	Google Play Store	1	0	0
Google Play Store	818a7eb1-be47-43c4-bcd8-94993b4d01a8	The application has become very bad after the latest update. After entering the password and confirming with the fingerprint, the application immediately closes.	Ahmad Moslli	##########			7	ar	us		1	ar	application become bad late update enter password confirm fingerprint application immediately close	Negative	Google Play Store	1	1	0
Google Play Store	680f77ea-0456-45fc-8660-93b1d5138a4f	"Wow"	A.H.A	##########			0	ar	us		5	ar	wow	Positive	Google Play Store	0	0	0
Google Play Store	bd7b8a9d-e141-4f76-ab4c-024ba1b13741	Every time I enter, it kicks me out. What is the solution?	محمد الهاشمي	##########			0	ar	us		2	ar	every time enter kick solution	Negative	Google Play Store	0	0	0
Google Play Store	894950f8-b3f8-40d6-b55e-3073c140dd7b	Easy and good.	حسن بن حريب	##########			0	ar	us		5	ar	easy good	Positive	Google Play Store	0	0	0
Google Play Store	2fe0920a-29e5-4598-9982-bb3c440ed93e	"Very bad application that exits automatically."	Mubarak	##########			0	ar	us		1	ar	bad application exit automatically	Negative	Google Play Store	1	1	0
Google Play Store	31dc3558-6c1f-4f8f-8192-b795220776b3	Excellent very fast	Fahad Gaber	##########			0	ar	us		5	ar	excellent fast	Positive	Google Play Store	0	0	0
Google Play Store	a8f165e4-8fe2-4641-9de8-b5b8764fa5c9	Bad and complicated	محمد الشيخ1	##########			0	ar	us		1	ar	bad complicate	Negative	Google Play Store	1	0	0
Google Play Store	a1fbf622-4e40-49ea-bcff-075f3493f017	He/She will log out of the application.	عمار دبوان	##########			0	ar	us		1	ar	heshe log application	Neutral	Google Play Store	0	1	0
Google Play Store	c3696e90-6eeb-438f-8a4d-b91f98c68af1	"Every time I try to log in, it automatically closes and goes out of the application. It's very frustrating. May Allah help me."	علي العواجي	##########			0	ar	us		1	ar	every time try log automatically close go application frustrate may allah help	Negative	Google Play Store	1	1	0
Google Play Store	8d429828-6fbb-439c-831b-8ae0fc06f50b	"An application is a joke .. I log in and it kicks me out immediately."	Maher Pale	##########			0	ar	us		1	ar	application joke log kick immediately	Negative	Google Play Store	0	1	0
Google Play Store	d665b57b-93f0-4ec4-9579-611e94c889a0	Bad application that crashes suddenly	FFN	##########			0	ar	us		1	ar	bad application crash suddenly	Negative	Google Play Store	1	1	0
Google Play Store	80ef358d-05b2-46a4-929e-01d76adfc239	The comment is annoying/frustrating.	des az	##########			1	ar	us		5	ar	comment annoyingfrustrating	Negative	Google Play Store	1	0	0
Google Play Store	a56d2e41-f68f-4045-a8c8-9a66e3e16f2b	Very bad application	medo ezo	##########			1	ar	us		1	ar	bad application	Negative	Google Play Store	1	0	0
Google Play Store	7ba09f58-822c-45a9-9276-1abe76694a55	The application has become slow beyond limits and it freezes a lot, and the fingerprint recognition is delayed???	Walid	##########			1	ar	us		1	ar	application become slow beyond limit freeze lot fingerprint recognition delay	Negative	Google Play Store	1	0	1
Google Play Store	e8396af9-2648-4fa9-a242-79953f9366b0	Beautiful	مناحي الفضلي	##########			0	ar	us		5	ar	beautiful	Positive	Google Play Store	0	0	0
Google Play Store	2bffcb09-adb4-47d8-ae56-9c494b498f79	The application used to be excellent and easy, but now it has become very bad and hangs, which raises the pressure.	عبدالرحمن العليان	##########			2	ar	us		1	ar	application use excellent easy become bad hang raise pressure	Negative	Google Play Store	1	0	1
Google Play Store	085bbfec-4e39-4a15-afc2-6841fe4ad5dc	I thank SABB Bank for this excellent service.	حبيب علي	##########			0	ar	us		5	ar	thank sabb bank excellent service	Positive	Google Play Store	0	0	0
Google Play Store	dceb4f3a-25e8-42a2-bd96-348bd72cc36c	The application is very bad. As soon as you open the application, it crashes, find a solution for yourself or delete it. It's a shame to have a star for it.	قاسم بيشي	##########			0	ar	us		1	ar	application bad soon open application crash find solution delete shame star	Negative	Google Play Store	1	1	1
Google Play Store	301c429b-2340-4427-a472-77f97ace8960	Thank you.	‪sweder mazloh (‫الشمال‬‎)‬‏	##########			0	ar	us		5	ar	thank	Positive	Google Play Store	0	0	0
Google Play Store	ccae0767-ebf0-4717-af0d-4a2a180e8065	The application is bad, every time I enter it, it logs out immediately.	Ahmed elghopary	##########			0	ar	us		1	ar	application bad every time enter log immediately	Negative	Google Play Store	1	0	0
Google Play Store	8091b02c-becc-4795-970b-09f6aaea833d	After the recent updates, the application is not working. It suddenly pops up and opens and closes again after logging in. It keeps repeating this process. Please solve the problem.	الرعدي الرعدي	2023-02-09 07:49:00			5	ar	us		1	ar	recent update application work suddenly pop open close log keep repeat process please solve problem	Negative	Google Play Store	0	1	0
Google Play Store	07261e94-c906-480a-a194-fe90985854cd	Garbage program, garbage, garbage, garbage.	علوي باعلوي	##########			0	ar	us		1	ar	garbage program garbage garbage garbage	Negative	Google Play Store	0	1	1
Google Play Store	0f12650e-b6be-4bbf-bb93-920c4149d68f	The program, after the update, quickly enters and exits. I hope you can solve the problem as soon as possible, please.	Esmail Almahdaly	##########			1	ar	us		4	ar	program update quickly enter exit hope solve problem soon possible please	Neutral	Google Play Store	0	1	0
Google Play Store	b64c42ca-5353-4c15-ae96-c4cc1ebc3f9b	The application is very bad and does not work. It used to be beautiful and its usage was great. Now it's very, very, very bad. It's necessary to solve the problem.	أبو رياض	##########			32	ar	us		1	ar	application bad work use beautiful usage great bad necessary solve problem	Negative	Google Play Store	1	1	0
Google Play Store	b86ab436-8e94-490b-a285-84c46009d8a3	Why every time I open the application and after accepting the fingerprint, the application closes?	مستخدم Google	##########			0	ar	us		1	ar	every time open application accept fingerprint application close	Negative	Google Play Store	0	1	0
Google Play Store	73c77a78-8670-4750-b29a-154d9da7f292	Every time I try to log in, it annoys me.	rashad tayeb	##########			1	ar	us		1	ar	every time try log annoy	Negative	Google Play Store	1	0	0
Google Play Store	42d2bd3f-d27e-47c9-b70f-db487f97a0da	Enter the password and the fingerprint will lock the application.	2023-01-11 00:00:00	##########			0	ar	us		1	ar	enter password fingerprint lock application	Neutral	Google Play Store	0	1	0
Google Play Store	a8a1ce79-f571-4cd7-9e02-12651bcd99de	The application is bad and crashes suddenly. I request the immediate release of an update to improve the functionality of the application.	Majed Almalki	##########			1	ar	us		1	ar	application bad crash suddenly request immediate release update improve functionality application	Negative	Google Play Store	1	1	1
Google Play Store	2ed56c3e-cded-45d1-b9c2-5edce43a4577	The application is very bad, it constantly crashes every time on its own and does not allow me to access my account. There is no one to answer or address any of the customers' issues. Honestly, this is the worst customer service I have ever seen.	Hamada Said	2023-02-07 00:11:00			1	ar	us		1	ar	application bad constantly crash every time allow access account one answer address customers issue honestly bad customer service ever see	Negative	Google Play Store	1	1	1
Google Play Store	2bd362fa-cf1f-4fa1-a2e2-707c430963f5	There are problems with the application.	محمد عبدالله	##########			1	ar	us		1	ar	problems application	Negative	Google Play Store	0	1	0
Google Play Store	49d687d8-b6f9-46cc-830a-8bc01ed3a8cc	The application has become terrible. At first, it was good because when you open the application and enter the password, it opens and works smoothly. However, after the update, it became bad. It is exhausting to use the application. Every time I update, the service in it becomes poor. I have to open the application more than four times for it to open and then it closes.	المهندس امين ”الخلي“ الخلي	##########			6	ar	us		1	ar	application become terrible first good open application enter password open work smoothly however update become bad exhaust use application every time update service become poor open application four time open close	Negative	Google Play Store	1	1	0
Google Play Store	6439955a-faee-491a-be25-608c43ce5536	A the worst application, every time you try to enter the application it logs you out and tells you that the fingerprint is stuck. Seriously, it's exhausting us, find a solution.	أبو سيد فاضل	##########			1	ar	us		1	ar	bad application every time try enter application log tell fingerprint stick seriously exhaust us find solution	Negative	Google Play Store	1	0	0
Google Play Store	cb82a01e-2766-4931-95f0-fb4d655c5c38	Excellent very much	ثقيلة شمايل	2023-02-05 00:58:00			0	ar	us		5	ar	excellent much	Positive	Google Play Store	0	0	0
Google Play Store	9abe8a67-bc20-4042-859f-d2a4cf6ffe78	Many updates + now when I log in, it closes by itself.	سهم	##########			0	ar	us		1	ar	many update log close	Neutral	Google Play Store	0	1	0
Google Play Store	d506a6c6-9a7a-4a4a-87d4-ac4515e303f5	He procrastinates a lot... not good.	ذكي عبدالكريم	##########			0	ar	us		1	ar	procrastinate lot good	Negative	Google Play Store	1	0	0
Google Play Store	140c428d-6cbc-4e70-9052-de8b854056fb	The application does not open.	أحمد المشّني	##########			0	ar	us		1	ar	application open	Neutral	Google Play Store	0	1	0
Google Play Store	5132915b-84e2-44c0-ae43-3dfbe456e2af	The application has a problem.	بدا سفاب	##########			1	ar	us		1	ar	application problem	Negative	Google Play Store	0	1	0
Google Play Store	e64e7ef3-b528-4173-a950-269d81610dc5	Please develop the application and the website similar to Al Rajhi, Al Ahli and other banks. Develop the services and design, and the most important point is the speed of the website and the application.	Ahmed azim	##########			0	ar	us		2	ar	please develop application website similar al rajhi al ahli bank develop service design important point speed website application	Neutral	Google Play Store	1	0	0
Google Play Store	691e8add-16a3-46df-9a8e-923c6a3f88e6	There is a problem with the application. It suddenly crashes repeatedly, and when reopened, it asks for login information again. Please solve the problem quickly to continue using it.	Mohamed Elbasiony	##########			22	ar	us		1	ar	problem application suddenly crash repeatedly reopen ask login information please solve problem quickly continue use	Negative	Google Play Store	0	1	1
Google Play Store	f0fea111-ca44-4518-9534-6d8d94da6666	"The worst bank application I have dealt with in Saudi Arabia."	wagdi mogadid	##########			0	ar	us		1	ar	bad bank application deal saudi arabia	Negative	Google Play Store	1	0	0
Google Play Store	693a67ac-c885-49ec-81c3-334ab9923d72	The application does not work, it closes on its own immediately after confirming login.	Abo_Malek -T7	##########			0	ar	us		1	ar	application work close immediately confirm login	Negative	Google Play Store	0	1	0
Google Play Store	75901659-2628-4e81-9e9a-3b9cdbdb09a3	It has become bad... I enter it and then exit, but it doesn't work, there are many stars.	MuAlrasheed	2023-02-02 04:21:00			0	ar	us		1	ar	become bad enter exit doesnt work many star	Negative	Google Play Store	1	1	0
Google Play Store	21030fd3-4a72-46e7-adec-a2457bcd0eeb	The bank's management and services are poor.	Hoho Alhoho	2023-02-02 02:46:00			0	ar	us		1	ar	bank management service poor	Negative	Google Play Store	1	0	0
Google Play Store	07ce0add-fd37-4801-ac37-a8051d2d1f70	The application is excellent and very easy.	Azooz Famliy	##########			0	ar	us		5	ar	application excellent easy	Positive	Google Play Store	0	0	0
Google Play Store	e79efbb9-4e7d-46e2-a90e-8d9611274208	Honestly, the application is bad, it keeps crashing on its own.	midoo kassab	##########			0	ar	us		1	ar	honestly application bad keep crash	Negative	Google Play Store	1	1	0
Google Play Store	7f32d573-9e2c-464f-a945-174543ead5b8	bad bad	سلطان الحربي	##########			0	ar	us		1	ar	bad bad	Negative	Google Play Store	1	0	0
Google Play Store	c044cafd-fb7a-49ae-8195-5db26b9f19be	Every time I try to log in, it opens and then disappears.	حساب استخدام	##########			0	ar	us		1	ar	every time try log open disappear	Negative	Google Play Store	0	1	0
Google Play Store	6c3d487f-01fc-480b-9211-59bc4c3898d7	Very excellent	حول العالم 2مليون مشترك	##########			0	ar	us		5	ar	excellent	Positive	Google Play Store	0	0	0
Google Play Store	a9043669-c85a-46fc-a622-545c99e143bc	The application, as soon as it opens, immediately takes me out of the application.	Ali Al Jufri	##########			0	ar	us		1	ar	application soon open immediately take application	Negative	Google Play Store	0	1	0
Google Play Store	279ddafb-f806-4318-ad05-e41aed47af9e	It does not work, and it keeps exiting repeatedly because we cannot pay the bills or know the balance. It has been deleted and restored multiple times, but without any use.	ابـوسـمـر الـبارقـي	##########			4	ar	us		1	ar	work keep exit repeatedly pay bill know balance delete restore multiple time without use	Negative	Google Play Store	0	1	0
Google Play Store	19fa530f-dc9d-4f94-9bf6-5abc21de58e4	You complete all login steps in seconds, but the application automatically logs you out. I hope you can fix this issue.	منوعات دوت كوم Hd	##########			0	ar	us		5	ar	complete login step second application automatically log hope fix issue	Negative	Google Play Store	0	1	0
Google Play Store	b4279ca1-b3ae-408c-ae62-15d36641c268	The application does not work as soon as I log in to my account. The account gets closed and logged out, so I am unable to perform any transactions. Does the application have a malfunction?	Hamada Shaker	##########			0	ar	us		1	ar	application work soon log account account get close log unable perform transactions application malfunction	Negative	Google Play Store	0	1	0
Google Play Store	411c6925-2944-4f8b-8000-d2f6fca25718	A very, very bad program. The program is extremely slow and frequently freezes, and most of the time it exits the program.	خالد ناصر	##########			1	ar	us		1	ar	bad program program extremely slow frequently freeze time exit program	Negative	Google Play Store	1	0	1
Google Play Store	a2f6d176-ab39-4307-a66a-1ac9c330e9ff	What is wrong with the program? It has become bad; it enters and exits suddenly without any warning, and the repeated attempts are annoying.	Samy Hassan	##########			3	ar	us		1	ar	wrong program become bad enter exit suddenly without warn repeat attempt annoy	Negative	Google Play Store	1	1	0
Google Play Store	511f056b-bc54-40fa-a67d-c147f133aab1	The application is distinctive or special.	أبوعلي الأحساء	##########			0	ar	us		5	ar	application distinctive special	Neutral	Google Play Store	1	0	0
Google Play Store	48f64700-9b99-4cc2-9446-7f1184fab572	The app is very bad, every time we open it, it closes on its own.	Doaa Elhosainy	##########			0	ar	us		1	ar	app bad every time open close	Negative	Google Play Store	1	0	0
Google Play Store	8aa0c506-ef6a-42f2-9fcd-9ba1515db4ea	The permanent credit limit should be allowed to be changed, as well as many other services through the website.	مختار كمال	##########			0	ar	us		2	ar	permanent credit limit allow change well many service website	Neutral	Google Play Store	1	1	0
Google Play Store	acd3a897-7776-484d-8e4d-6cebbc3d4b33	The transfer is good and fast from one account to another.	بذكرك ربي يطمئن قلبي	##########			0	ar	us		4	ar	transfer good fast one account another	Positive	Google Play Store	0	0	0
Google Play Store	ff3b71a3-f754-4a1b-ae90-df8d205db162	Very very bad	Elaf Gamal	##########			0	ar	us		1	ar	bad	Negative	Google Play Store	1	0	0
Google Play Store	2e643260-cbdd-4bf5-95ae-16f763c89e45	It comes out to me alone.	عثمان عمارة	##########			0	ar	us		1	ar	come alone	Neutral	Google Play Store	0	0	0
Google Play Store	8b67f22e-a727-42a7-b45a-12072f8b1e27	Whenever I enter the application, it closes.	Hanadi Tamo	##########			0	ar	us		1	ar	whenever enter application close	Neutral	Google Play Store	0	1	0
Google Play Store	63535b94-d0a3-43be-86b5-206788c805db	The program has a problem, it immediately crashes as soon as you enter the verification code, it opens and then closes and exits the program. Please solve the problem. ❌❌	المنسي رومنسي	##########			0	ar	us		1	ar	program problem immediately crash soon enter verification code open close exit program please solve problem	Negative	Google Play Store	0	1	0
Google Play Store	693d0c29-25df-42f2-ba63-2c916c7cb0eb	Very bad and it opens after many attempts.	Ahmed Hussein	##########			0	ar	us		1	ar	bad open many attempt	Negative	Google Play Store	1	1	0
Google Play Store	8a7d434e-10eb-423b-a140-e51da31730f2	Easy and fast	فيصل بن محمد	##########			0	ar	us		5	ar	easy fast	Positive	Google Play Store	0	0	0
Google Play Store	2198c4b9-3107-472f-a222-bc3e74e19a03	"The application is bad, it logs me in and logs me out automatically."	ميمي ميمي	##########			0	ar	us		1	ar	application bad log log automatically	Negative	Google Play Store	1	1	0
Google Play Store	d7ba3e53-de25-4f1d-b0dd-7f49ea951498	Every time I enter a password, it completely logs me out. For me, it's a terrible service.	ايمان السبيعي	##########			0	ar	us		3	ar	every time enter password completely log terrible service	Negative	Google Play Store	0	1	0
Google Play Store	40a029a3-a7c2-42e2-8959-8b072c6c856e	It's as if this business is cursed. Every time I try to enter, it kicks me out by itself. I log into the account and it asks for my fingerprint and everything, then immediately kicks me out. Please find a necessary solution for us.	احمد وكيل الوكيل	##########			3	ar	us		1	ar	business curse every time try enter kick log account ask fingerprint everything immediately kick please find necessary solution us	Negative	Google Play Store	1	1	0
Google Play Store	54dec803-cd33-40b8-a446-bafa886262e2	The application is the worst, it always shows me that the Sab Mobile has been stopped and all my financial transactions have been disrupted.	Wissam Yousef	##########			0	ar	us		5	ar	application bad always show sab mobile stop financial transactions disrupt	Negative	Google Play Store	1	1	0
Google Play Store	91965856-65b6-4391-83ca-04ab30445f72	The bank is generally a bad bank. Once, I made a payment to the Ministry of Interior to settle the fees for the exit and return of one of my children. In the end, the payment was not processed and the amount was not refunded. I tried to follow up with them but it was unsuccessful. I went to more than one branch hoping they would assist me, but it was no use. I also contacted customer service, but…	شبل التراخم	##########			0	ar	us		1	ar	bank generally bad bank make payment ministry interior settle fee exit return one children end payment process amount refund try follow unsuccessful go one branch hop would assist use also contact customer service also unsuccessful end keep riyals	Negative	Google Play Store	1	1	0
Google Play Store	6d7a5469-f5e0-4dfb-9bd6-7204f3dd101a	The best program after Riyadh and Al-Inma.	Maher Ahmed	##########			0	ar	us		5	ar	best program riyadh alinma	Positive	Google Play Store	0	0	0
Google Play Store	93448423-512c-4745-81cd-34d443ff3b27	The application in the latest update is very bad, it doesn't open for me. Update 11-01-2023.	Omar Ezz	##########			0	ar	us		1	ar	application late update bad doesnt open update	Negative	Google Play Store	1	1	0
Google Play Store	15e68286-b4eb-4a41-81b2-8a474c9ebd74	The latest update is very very very very very bad, it keeps crashing and doesn't open at all, it's extremely bad.	Ehab Pop	##########			4	ar	us		1	ar	late update bad keep crash doesnt open extremely bad	Negative	Google Play Store	1	1	0
Google Play Store	2a6a9a62-2ac5-452c-b699-c5b26d089661	The application automatically exits when I enter the code.	WORK ER	##########			0	ar	us		1	ar	application automatically exit enter code	Neutral	Google Play Store	0	1	0
Google Play Store	90b70675-5932-4c7d-88ee-596c21160cc9	Very beautiful	البحر الأحمر	##########			1	ar	us		5	ar	beautiful	Positive	Google Play Store	0	0	0
Google Play Store	881380a2-1305-4b11-b4db-f7b633cee4ff	Failed bank	ابو عبدالرحمن	##########			0	ar	us		1	ar	fail bank	Negative	Google Play Store	1	1	0
Google Play Store	82d6641b-3466-4002-b375-5035e230c022	Perfect / All good	الطاهر حماد	##########			0	ar	us		5	ar	perfect good	Positive	Google Play Store	0	0	0
Google Play Store	ad4d5b28-2570-400c-bb43-6e26417abda1	Very good	Mohammed Algaili	##########			0	ar	us		5	ar	good	Positive	Google Play Store	0	0	0
Google Play Store	5446f889-c284-466f-8aef-0b8dd49b61c1	The application has been logging in since yesterday, it opens and then closes after 30 seconds. Please help.	Moh Alfath	##########			0	ar	us		1	ar	application log since yesterday open close second please help	Negative	Google Play Store	0	1	0
Google Play Store	4379f19d-a3ff-4391-9306-235bd0e16bcd	The application is not working, so what is the problem? Oh SABB Bank, fix our issues and make the application function properly.	basiem alamei	##########			0	ar	us		1	ar	application work problem oh sabb bank fix issue make application function properly	Negative	Google Play Store	0	1	0
Google Play Store	af88c786-73cf-4033-aed0-ec717e7f26f3	The application hangs and confuses between the status of instant transfer and deferred transfer.	تسبيحة طائر 2019	##########			0	ar	us		3	ar	application hang confuse status instant transfer defer transfer	Negative	Google Play Store	0	1	1
Google Play Store	9c405aba-3546-41b1-bed1-e13224c123f4	Shame on you! It has been more than five days and I have been trying to reach out to you, and you keep saying update the application and we did, but the problem remains. We cannot benefit from the online platform at all.	احمد مشرقي	##########			0	ar	us		1	ar	shame five days try reach keep say update application problem remain benefit online platform	Negative	Google Play Store	1	0	0
Google Play Store	6b7b53a6-1304-452e-836d-c5b70497efb6	Very good.	درار جيلاني	##########			0	ar	us		5	ar	good	Positive	Google Play Store	0	0	0
Google Play Store	aed31c68-6b5a-4fc4-8945-78960d6b0187	Very good.	Banadr Almoualad	##########			0	ar	us		4	ar	good	Positive	Google Play Store	0	0	0
Google Play Store	5b00edad-8a44-43eb-b4c3-c738a54536c9	The program is extremely bad, I cannot work on it. It's slow, every time I enter the password it opens and closes at the same time.	Elsaed Mohamdy	##########			3	ar	us		1	ar	program extremely bad work slow every time enter password open close time	Negative	Google Play Store	1	1	1
Google Play Store	5d7ef62e-8aa3-40aa-8c2c-7a0757c065c8	The application has become bad, and when you log in, it automatically logs you out. Please solve the problem.	مصطفى جلال	##########			0	ar	us		1	ar	application become bad log automatically log please solve problem	Negative	Google Play Store	1	1	0
Google Play Store	d5eb7b0f-2cd8-4ff6-94e4-7341bc3be956	The service is very bad, and when transferring from one bank to another, the commission is very high, more than 5 riyals, while Al Rajhi Bank and Alahli Bank charge less than one riyal.	حسين حسين	##########			0	ar	us		1	ar	service bad transfer one bank another commission high riyals al rajhi bank alahli bank charge less one riyal	Negative	Google Play Store	1	0	0
Google Play Store	da127c7e-d852-4187-a45a-c2ddc2c6e734	A very excellent bank and has had good modifications to satisfy customers.	Mohammed Abas	##########			0	ar	us		5	ar	excellent bank good modifications satisfy customers	Positive	Google Play Store	0	0	0
Google Play Store	0a19cd71-4eb3-4122-8e13-372a39ca262b	Excellent and very easy to use. It has quick and easy services and achievements.	ماجد	##########			1	ar	us		5	ar	excellent easy use quick easy service achievements	Positive	Google Play Store	0	0	0
Google Play Store	5509043a-e76e-47ce-b354-14457e7b7fb0	Worst than this application, I've never seen. May Allah be our avenger in you and in their trashy application. It doesn't even show you the name of the account owner you're transferring to. And now, after the update, it has become worse than before. A trash bank, just like their application.	ابوطﻻل العباسي	##########			0	ar	us		1	ar	bad application ive never see may allah avenger trashy application doesnt even show name account owner youre transfer update become bad trash bank like application	Negative	Google Play Store	1	1	0
Google Play Store	bd4d132a-5d15-4d69-8172-03b178421e2c	Excellent application	يحيى النوب	##########			0	ar	us		5	ar	excellent application	Positive	Google Play Store	0	0	0
Google Play Store	0c2dfb58-0061-4275-b3d1-eb8ad4e837eb	Beautiful	shaima yb	##########			0	ar	us		5	ar	beautiful	Positive	Google Play Store	0	0	0
Google Play Store	829c8bf9-8fbb-4148-828d-93c23f61a2e8	The application is fine, but the unnecessary efforts should be stopped. The bank's management is very, very bad; they should stop making updates every now and then.	mmm mmm	##########			0	ar	us		1	ar	application fine unnecessary efforts stop bank management bad stop make update every	Negative	Google Play Store	1	0	0
Google Play Store	3114c614-7a84-41c7-9843-07c3c9f828a8	Excellent	ابو ناصر	##########			0	ar	us		5	ar	excellent	Positive	Google Play Store	0	0	0
Google Play Store	99b8d9e8-3caa-491a-a503-1bb9ca2bec1d	It has become very bad to the extreme that you enter the username and password, activate the fingerprint, and the code comes in a text message. The application opens, but within a second it crashes and asks you to start the login steps from scratch. You have already deleted and downloaded it again, but it is still in this condition for two days.	Salah khyir	##########			0	ar	us		1	ar	become bad extreme enter username password activate fingerprint code come text message application open within second crash ask start login step scratch already delete download still condition two days	Negative	Google Play Store	1	1	1
Google Play Store	2203cf43-8e6a-4033-b3af-08e04bfbc50a	The worst application.	سلطان عمر	##########			0	ar	us		1	ar	bad application	Negative	Google Play Store	1	0	0
Google Play Store	8e767cc7-4c9b-47d8-b708-f264bf438333	Very bad after the update.	Ahlam Alamer	##########			0	ar	us		1	ar	bad update	Negative	Google Play Store	1	0	0
Google Play Store	d725d944-bcc5-40e4-a153-1c8a2e3b06a5	Every time I enter the application, I have to update and give you accurate location data. The issue has turned into collecting information and invading privacy more than providing a service!	علي القيسي	##########			2	ar	us		1	ar	every time enter application update give accurate location data issue turn collect information invade privacy provide service	Negative	Google Play Store	1	1	0
Google Play Store	cc1ab266-d05f-4949-9aeb-53e0ab339d8f	Good	حـمـد الشريف	##########			0	ar	us		3	ar	good	Positive	Google Play Store	0	0	0
Google Play Store	cf352a47-7351-4b6a-8ffe-2d1bbfc4868e	⛔️ Recently, the application has become extremely slow and keeps freezing, making it impossible to take any action within the app due to this problem. It's worth mentioning that I am using the S22 Ultra. I kindly request a prompt resolution to this issue, as everything now depends on using applications and taking action through them. 🤚🏻	Walad7arb - Be happy	##########			0	ar	us		1	ar	recently application become extremely slow keep freeze make impossible take action within app due problem worth mention use ultra kindly request prompt resolution issue everything depend use applications take action	Negative	Google Play Store	0	1	1
Google Play Store	2e5ba42e-4b03-4d2a-b0a7-ae2e9822d773	Wonderful	Abdul HTC	##########			0	ar	us		5	ar	wonderful	Positive	Google Play Store	0	0	0
Google Play Store	ad82d5de-760e-463e-b6e5-57806288ef8c	Excellent	hassan alshami	##########			0	ar	us		5	ar	excellent	Positive	Google Play Store	0	0	0
Google Play Store	99a56822-ca4f-4825-a379-55f99aaca79d	After the update, the application became bad, slow, and freezing, and it is not possible to complete operations.	sami alzaid	##########			2	ar	us		1	ar	update application become bad slow freeze possible complete operations	Negative	Google Play Store	1	0	1
Google Play Store	f8a28a59-c34b-4928-8b2d-74124f304bad	Very wonderful and includes all services...easy to deal with.	Ammar Alsalahi	##########			0	ar	us		5	ar	wonderful include serviceseasy deal	Positive	Google Play Store	0	0	0
Google Play Store	857144f6-936e-4889-b6a4-0046ce66f701	After the update, the application became slow and hangs when I browse my balance. It keeps showing a message to close the application every time it hangs and slows down, and it kicks you out of the application.	مصطفى ابو احمد	##########			2	ar	us		1	ar	update application become slow hang browse balance keep show message close application every time hang slow kick application	Negative	Google Play Store	0	0	1
Google Play Store	00e4beac-269f-473b-833b-cf4880ecd8e5	The program is very bad to the extreme. It hangs and exposes us in front of people. The ones we want to transfer to it, also in paying bills. I swear this shouldn't happen. If there is a solution, please help us. I've been suffering for 6 months. I used to trust the network, but it turned out to be the fault of the program. Every time I call, they tell me to uninstall the application and reinstal…	حسام حلواني	##########			0	ar	us		1	ar	program bad extreme hang expose us front people ones want transfer also pay bill swear shouldnt happen solution please help us ive suffer months use trust network turn fault program every time call tell uninstall application reinstall	Negative	Google Play Store	1	1	1
Google Play Store	21033bfd-8a82-4864-bb73-2c70fce8ff7d	After the update, it has become extremely slow, especially in conversions. Please solve this problem as soon as possible.	مكي لاجامي	2023-01-09 06:51:00			3	ar	us		1	ar	update become extremely slow especially conversions please solve problem soon possible	Negative	Google Play Store	0	1	1
Google Play Store	1cdd17f6-3435-4f1c-9abb-6c34ef311005	The application freezes after the latest update. Please resolve the issue.	احمد يحيى (‪Ahmad yahya‬‏)	##########			1	ar	us		1	ar	application freeze late update please resolve issue	Negative	Google Play Store	0	1	1
Google Play Store	32924302-a9d1-4052-99d2-51e533f5abfc	After the latest update, it became very bad and slow.	ابتسام الحسن	2023-01-07 04:03:00			6	ar	us		1	ar	late update become bad slow	Negative	Google Play Store	1	0	1
Google Play Store	92125e1b-ccac-4d25-aef3-5345dd18c7ad	Trash	EBRAHIM إبۣۗـۙرآهۣۗہيۣۗہمۣۗـۙ	##########			0	ar	us		1	ar	trash	Negative	Google Play Store	1	0	0
Google Play Store	4b933e91-4521-4c81-97a4-b4839e48487a	Excellent	محمود نصار	##########			0	ar	us		5	ar	excellent	Positive	Google Play Store	0	0	0
Google Play Store	dff12458-eece-489f-892b-22f26daa108d	If there were less than a star, I would have given it. The worst update. It's unbelievable that a bank as big as SABB would create an application with such poor quality. I swear to God, this might be a reason to close my account and leave the bank altogether.	Ragab Halim	##########			1	ar	us		1	ar	less star would give bad update unbelievable bank big sabb would create application poor quality swear god might reason close account leave bank altogether	Negative	Google Play Store	1	0	0
Google Play Store	6ed56f85-d1b1-4719-940e-858855af817c	Good	Mohamed Amer	2023-01-05 06:25:00			0	ar	us		4	ar	good	Positive	Google Play Store	0	0	0
Google Play Store	e5301332-2e14-4ea1-bab7-b7d92bb301d8	The application hangs.	MONEEF ALGAHTANI	##########			1	ar	us		1	ar	application hang	Negative	Google Play Store	0	0	1
Google Play Store	66d8d58f-9238-4777-aaf6-87d816cd033c	Very good	يوسف الجمعة	##########			0	ar	us		5	ar	good	Positive	Google Play Store	0	0	0
Google Play Store	76b1ca2d-bf19-490d-8e54-eaee86774eee	The application is very bad, it always freezes and is very slow.	mohammad al-hussain	##########			0	ar	us		1	ar	application bad always freeze slow	Negative	Google Play Store	1	0	1
Google Play Store	d7e3df6f-d130-4a91-8a76-ad6baaeaa6ac	The application doesn't open.	Ghost Back	2023-01-02 08:03:00			0	ar	us		1	ar	application doesnt open	Negative	Google Play Store	0	1	0
Google Play Store	7957e498-9d55-4f16-9a5e-d6c9eb5d2153	Very bad and slow, and when paying bills, it freezes and disappears.	بو غالي	2023-01-02 07:04:00			0	ar	us		1	ar	bad slow pay bill freeze disappear	Negative	Google Play Store	1	0	1
Google Play Store	88845bcb-8107-4103-880a-874de9136c5f	The program was good, but now it's frozen. I don't know how to pay or perform any operations. What's going on?	Hesham Alhassan	##########			0	ar	us		3	ar	program good freeze dont know pay perform operations whats go	Negative	Google Play Store	1	1	1
Google Play Store	6804ddd4-4527-4e80-8919-6dec09e46fa7	"The application freezes poorly, it does not perform operations, and finally, it asks for a forced shutdown."	ابو سامي	##########			0	ar	us		1	ar	application freeze poorly perform operations finally ask force shutdown	Negative	Google Play Store	1	1	1
Google Play Store	2a26628f-131d-43a4-aa6b-ceede6eb6b10	Very slow to transfer to another customer's account.	B A	##########			0	ar	us		3	ar	slow transfer another customers account	Negative	Google Play Store	0	0	1
Google Play Store	7d6b928b-a187-4003-a9a3-4c312b67dbf4	The application is excellent in terms of content and services, but it is poorly programmed, as the application is heavy on mobile devices, even if your mobile phone is new like my S22 Plus Galaxy, I suffer from slowness and annoying lags in the application.	Bader AL Majnoni	##########			11	ar	us		3	ar	application excellent term content service poorly program application heavy mobile devices even mobile phone new like plus galaxy suffer slowness annoy lag application	Negative	Google Play Store	1	0	1
Google Play Store	43de6123-a94f-4000-892b-03d353f13289	The application is very very very slow and unresponsive.	ibrahim emohsien	##########			2	ar	us		1	ar	application slow unresponsive	Negative	Google Play Store	0	0	1
Google Play Store	17f6d681-fea0-4340-803c-ceed2da2ccf0	Enter the number that comes to my mobile phone and an error message appears to me 👎	Abdulaziz Alsaleh	2023-01-01 06:04:00			0	ar	us		1	ar	enter number come mobile phone error message appear	Negative	Google Play Store	0	1	0
Google Play Store	418132a1-cddb-4bc3-bbe6-027aefafdc70	The application used to be very excellent before, but currently it is very bad and does not execute the required transactions. It keeps stopping and exiting the program.	محمد عبد العزيز	##########			3	ar	us		1	ar	application use excellent currently bad execute require transactions keep stop exit program	Negative	Google Play Store	1	1	0
Google Play Store	40885731-fe49-409c-8ef9-4777b0fd2479	Recently, I have been unable to complete my tasks and use the browser.	Jameel Alamer	##########			2	ar	us		1	ar	recently unable complete task use browser	Negative	Google Play Store	0	1	0
Google Play Store	4b9fcb11-eb2d-4e20-87cd-52e0851b850a	the worst application that freezes and displays the message "Program is not responding" when encountering failure, and these gestures appear 👎.	Abdullah Harbi	##########			1	ar	us		1	ar	bad application freeze display message program respond encounter failure gesture appear	Negative	Google Play Store	1	1	1
Google Play Store	940ce094-5bd5-4627-8647-23b2d59fe074	Honestly, it used to be good at first, but it started freezing and slowing down two months ago.	Sarah mm	##########			0	ar	us		1	ar	honestly use good first start freeze slow two months ago	Negative	Google Play Store	1	0	1
Google Play Store	d8ec0bab-625d-48a4-83e9-67c08a9e9af0	The application is very slow.	Mohammed M	##########			0	ar	us		1	ar	application slow	Negative	Google Play Store	0	0	1
Google Play Store	dbd77ab3-4401-4e1e-8104-8b145c305791	The method is easy and convenient, but we need clarification on the name of the converter for transferring the amount to the account with text messages.	Eissa Bin Ali	##########			1	ar	us		5	ar	method easy convenient need clarification name converter transfer amount account text message	Neutral	Google Play Store	1	0	0
Google Play Store	9537d7be-4ee5-42a5-91b5-3dede20c28e1	It's bad, slow, what usually happens in a minute takes a quarter of an hour, it's not reasonable.	SAMI AHMED	##########			0	ar	us		1	ar	bad slow usually happen minute take quarter hour reasonable	Negative	Google Play Store	1	0	1
Google Play Store	4693f03c-95f4-4549-813b-9c80988454b9	Very bad to the highest degree, it is affecting my salary because every time I log in, it asks for my username. I put "forgot username" and it rejects the registered data on the card.	احمد العتيبي	##########			0	ar	us		1	ar	bad high degree affect salary every time log ask username put forget username reject register data card	Negative	Google Play Store	1	0	0
Google Play Store	f38a4fd1-a8f8-45db-9b81-a76a15a74485	After the new update, the application has become very slow and the screen freezes. We kindly request you to solve the problem quickly.	qzasr qzasR	##########			42	ar	us		2	ar	new update application become slow screen freeze kindly request solve problem quickly	Negative	Google Play Store	0	0	1
Google Play Store	41bd864f-c389-43ee-8439-be7934903f29	Very excellent, easy to use.	بسام شنو	##########			0	ar	us		5	ar	excellent easy use	Positive	Google Play Store	0	0	0
Google Play Store	abed1bc2-159b-4c4b-ab90-fb6a808103ec	The application has become constantly freezing and very very slow since the last update. We hope that you can solve this issue and update the application.	عبدالرحمن العقاد	##########			2	ar	us		2	ar	application become constantly freeze slow since last update hope solve issue update application	Negative	Google Play Store	0	1	1
Google Play Store	02325c85-f13a-4690-a25c-5dbaf57373f7	The application has become veerryy slow and keeps lagging, which causes interference in operations. Please solve the problem, if possible.	rakan zahran	##########			2	ar	us		1	ar	application become veerryy slow keep lag cause interference operations please solve problem possible	Negative	Google Play Store	0	0	1
Google Play Store	d96d1ac8-6f9a-4ffa-9dea-0b2fe28944e9	Very very very slow, it crashes and freezes on its own, and it kicks you out if it's below one star that you gave it.	Naif Nwaf	##########			0	ar	us		1	ar	slow crash freeze kick one star give	Negative	Google Play Store	1	0	1
Google Play Store	012982db-1d02-479a-9cb1-f1928f92c851	Very bad, it keeps crashing and says "under maintenance" for three days. I can't pay my bills, it used to be good and convenient before, but the bank has a loophole that doesn't protect the customer.	امل المعجل	##########			0	ar	us		1	ar	bad keep crash say maintenance three days cant pay bill use good convenient bank loophole doesnt protect customer	Negative	Google Play Store	1	1	0
Google Play Store	8020885c-cac5-44d2-b894-cb553ecaf024	"When I first opened the account, I made an international transfer, but the request was rejected by the bank. I filed a complaint every time they cancel the complaint, and I couldn't find any contact person for the bank. I transferred around 500 dollars with a fee of 100 riyals, and according to the imposed conditions, they should refund the amount. However, the bank has been avoiding any contact…	Ryū	##########			1	ar	us		1	ar	first open account make international transfer request reject bank file complaint every time cancel complaint couldnt find contact person bank transfer around dollars fee riyals accord impose condition refund amount however bank avoid contact still havent return amount	Negative	Google Play Store	0	1	0
Google Play Store	26b40278-9889-46a2-a067-5bbf3af16790	Splendor/wonder/beauty	محمد دقش	##########			0	ar	us		5	ar	splendorwonderbeauty	Positive	Google Play Store	0	0	0
Google Play Store	e3477d78-29a3-44cc-a146-5344be3345ae	Good	DEFFALLAH Deff	##########			0	ar	us		4	ar	good	Positive	Google Play Store	0	0	0
Google Play Store	d9b23e67-a0eb-4a0c-a3bb-389c7a835cbe	Great	fahd talhi	##########			0	ar	us		5	ar	great	Positive	Google Play Store	0	0	0
Google Play Store	76197c6f-93e2-4248-830b-7d2b36445e54	Sublime/Excellence	احمد العزي	##########			0	ar	us		5	ar	sublimeexcellence	Positive	Google Play Store	1	0	0
Google Play Store	c74a9cff-cb0b-43a3-90d9-de0cd601f316	Very easy.	ابوطلال عبدالعزيز	##########			0	ar	us		5	ar	easy	Positive	Google Play Store	0	0	0
Google Play Store	9926c2ca-daea-42d0-86a9-468dd33bc9a0	The program hangs a lot.	Mohammed Ibrahim	##########			1	ar	us		1	ar	program hang lot	Neutral	Google Play Store	0	0	1
Google Play Store	c37d7cc8-965f-47d2-b072-961592149d6e	The program above is bad and bothers me. It crashes multiple times and the first version was better. It used to be the best application, but now even if there is something below zero, it belongs to SAP. A lot of stars for writing this comment.	S MF	##########			1	ar	us		1	ar	program bad bother crash multiple time first version good use best application even something zero belong sap lot star write comment	Negative	Google Play Store	1	1	1
Google Play Store	bc887942-c7ee-4c93-80f8-4308d7a5f66b	Abnormal comment, please improve the quality of the application or change it and compete with other banks.	ابوعمر الشهري	##########			1	ar	us		1	ar	abnormal comment please improve quality application change compete bank	Negative	Google Play Store	1	0	0
Google Play Store	ff9e190d-d861-4d32-937c-7c33fa03273d	Excellent	VETO MEN	##########			1	ar	us		5	ar	excellent	Positive	Google Play Store	0	0	0
Google Play Store	bbb52652-cae5-406c-ba1d-71edab412f08	The latest update forces me to open the website, and this is something I do not want.	jaleel molaik	##########			0	ar	us		3	ar	late update force open website something want	Negative	Google Play Store	0	1	0
Google Play Store	8dc19c45-1b3a-477d-a6fe-1ec03eb82746	The application used to be excellent, but with the recent updates, it has become bad. There are system errors and delays in executing operations. For example, when transferring from accounts to the main account, the application freezes. It is an important application for the bank's reputation, and I am frustrated with it, while others praise and commend the bank's application. I am planning to ch…	dossary dossary	##########			1	ar	us		1	ar	application use excellent recent update become bad system errors delay execute operations example transfer account main account application freeze important application bank reputation frustrate others praise commend bank application plan change bank customer years loan benefit interest rat want advise delete application	Negative	Google Play Store	1	1	1
Google Play Store	33108d32-dea1-419c-b412-22250a5884f3	Your application is like crap. It hangs and is annoyingly slow. By Allah, if there were fewer than one star, I would have given it. You don't even deserve one star.	SHiRO	##########			1	ar	us		1	ar	application like crap hang annoyingly slow allah few one star would give dont even deserve one star	Negative	Google Play Store	1	0	1
Google Play Store	522846ac-acc0-4110-8300-b93083509f39	Very bad	رقية آل ناس	##########			1	ar	us		1	ar	bad	Negative	Google Play Store	1	0	0
Google Play Store	d3de2bd0-343e-4c44-8442-712a111a6632	First, it was acceptable, but now it is very, very bad. It freezes and is slow.	hiazoozi	##########			3	ar	us		1	ar	first acceptable bad freeze slow	Negative	Google Play Store	1	0	1
Google Play Store	9028c853-6134-431a-85f7-bf56627b44b9	The update has been completed, but the frequent updates sometimes cause the service to malfunction. I may be unavailable at times, either in the mall or as a cashier.	Haifa Dairy	##########			2	ar	us		5	ar	update complete frequent update sometimes cause service malfunction may unavailable time either mall cashier	Negative	Google Play Store	0	1	0
Google Play Store	215cb902-2cc2-45ab-bbf5-0b6087c6d383	Very, very bad! With the new update, it has become very bad, slow, and keeps cutting off, and the page remains frozen. Please fix it and review the errors in it.	Ali Farhan	##########			5	ar	us		1	ar	bad new update become bad slow keep cut page remain freeze please fix review errors	Negative	Google Play Store	1	0	1
Google Play Store	d104941f-ceea-43a9-8118-1ce21148f10e	The application is bad, slow, and not worth one star. Previously, it was excellent, but now it is a failure.	احمد الفرحان	##########			3	ar	us		1	ar	application bad slow worth one star previously excellent failure	Negative	Google Play Store	1	0	1
Google Play Store	a5d44bf1-6415-4cec-b696-29f2fce1a2d9	the worstprogram that freezes even though I have a Note 20 Ultra and have updated it to the latest version, and it's still the same.	RDX 88	##########			1	ar	us		1	ar	worstprogram freeze even though note ultra update late version still	Negative	Google Play Store	1	0	1
Google Play Store	ac80379e-d22b-4571-ad6b-b35d7605a4f2	One of the most beautiful things is to always have success, progress, and prosperity.	الصديق محمد	##########			0	ar	us		5	ar	one beautiful things always success progress prosperity	Positive	Google Play Store	1	0	0
Google Play Store	082df6b4-6748-4697-addc-adcc4a61a05a	The application is freezing and slow.	khalil alnuman	##########			1	ar	us		1	ar	application freeze slow	Negative	Google Play Store	1	0	1
Google Play Store	363f3bdd-1093-4d4c-abb7-5da829a318d9	Very very very bad, slow and freezing.	أبــونـواف	##########			2	ar	us		1	ar	bad slow freeze	Negative	Google Play Store	1	0	1
Google Play Store	b0b0132e-c83d-4730-b7a4-abc15dd39ce4	He began to improve after integration.	fahd alharthi	##########			0	ar	us		5	ar	begin improve integration	Positive	Google Play Store	1	0	0
Google Play Store	17159801-b915-48f6-9387-5360d08e229a	It used to be excellent to some extent, but now it is very, very bad, heavy, and slow.	JAWAD ALQATIFI	##########			2	ar	us		1	ar	use excellent extent bad heavy slow	Negative	Google Play Store	1	0	1
Google Play Store	59a1443f-8c83-460c-a52d-01d33056c1ff	Do I have to update every time I open the application??? It's really boring!!!!	ibrahim Ali	##########			2	ar	us		1	ar	update every time open application really bore	Negative	Google Play Store	1	0	0
Google Play Store	ff2f7a08-1e22-4b21-96ba-ed47953b2157	Very bad, unfortunately the update is bad, it freezes when it comes to fingerprint and the color is red. I think it doesn't recognize the fingerprint. No one is updating the application.	Abo Ahmed	##########			7	ar	us		1	ar	bad unfortunately update bad freeze come fingerprint color red think doesnt recognize fingerprint one update application	Negative	Google Play Store	1	0	1
Google Play Store	7145aa95-9e99-4226-9595-df2e0e7fa854	Failed bank and failed customer service.	Abobaker Ahmed	##########			0	ar	us		1	ar	fail bank fail customer service	Negative	Google Play Store	0	1	0
Google Play Store	5bca48f0-6b2f-4955-b3dd-ce957e2e8b46	Very nice.	ZX As	##########			0	ar	us		5	ar	nice	Positive	Google Play Store	0	0	0
Google Play Store	1cedc6b4-37ce-4d6c-8536-c37236a8b7ac	SABB Bank is excellent and all services are available, but the bank needs to increase the number of ATMs in all neighborhoods, and this is what I wanted to add.	Kaled Alkhalid	##########			0	ar	us		5	ar	sabb bank excellent service available bank need increase number atms neighborhoods want add	Positive	Google Play Store	1	0	0
Google Play Store	68245a3e-d751-4bf1-aa1c-6535deb83571	Thank you	قاسم حكمي	##########			0	ar	us		5	ar	thank	Positive	Google Play Store	0	0	0
Google Play Store	60d61e1e-4d3f-4eb2-9f86-3d27c557dc55	The application is very bad, every time I enter it does not send the code even though I updated my phone number.	مسعد سالمان	##########			2	ar	us		1	ar	application bad every time enter send code even though update phone number	Negative	Google Play Store	1	0	0
Google Play Store	f638918f-e10c-4df8-9f76-342bc9494c76	Very bad, always stops working, forcing you to log in again and then stops again.	Moh Amer	##########			8	ar	us		1	ar	bad always stop work force log stop	Negative	Google Play Store	1	1	0
Google Play Store	8f06990a-2bef-4c86-ab53-076dcc1fec58	Good try.	M . S	##########			0	ar	us		4	ar	good try	Positive	Google Play Store	0	0	0
Google Play Store	b9a1cc75-cba7-4520-954c-e335963fb24c	The entire program has errors and is not currently accepting bill payments.	mohamed Samir	##########			2	ar	us		1	ar	entire program errors currently accept bill payments	Negative	Google Play Store	0	1	0
Google Play Store	328ba5f6-08ff-407f-91f0-9dedd1cfc4b9	There is a problem with the app's performance.	كريم الدار	##########			0	ar	us		5	ar	problem apps performance	Negative	Google Play Store	0	1	0
Google Play Store	86f45d48-6d0e-40b2-adab-19c0305481a1	The application freezes.	Mahdi Alajmi	##########			0	ar	us		1	ar	application freeze	Negative	Google Play Store	1	0	1
Google Play Store	7a190059-cf94-4951-8c79-40c5f00b5988	The application has become very slow.	Abdulnaser Alghamdi	##########			0	ar	us		2	ar	application become slow	Negative	Google Play Store	0	0	1
Google Play Store	bbc2cb8f-0891-42e5-a60a-073ed9549ce7	Very beautiful.	Yahya A	##########			0	ar	us		5	ar	beautiful	Positive	Google Play Store	0	0	0
Google Play Store	a552d1c3-0051-4353-9a71-da75a75c9c8e	No matter how much I describe it, I can't do justice to those who are responsible for it. They have provided me with all the banking services in this application. I don't expect to ever visit a branch and wait my turn amidst the crowds of customers. Thank you to everyone who contributed to its success.	Ali Awaji	##########			0	ar	us		5	ar	matter much describe cant justice responsible provide bank service application dont expect ever visit branch wait turn amidst crowd customers thank everyone contribute success	Positive	Google Play Store	1	0	1
Google Play Store	03226b8d-600e-4353-8f51-746fa3429fe3	The application is very, very bad. It freezes, it's slow, and it unexpectedly kicks you out of the program. It's not useful at all and it takes up more of your time than it's worth. I hope it will be improved so that we can use it quickly and efficiently. Thank you.	البندري فلمبان	##########			128	ar	us		1	ar	application bad freeze slow unexpectedly kick program useful take time worth hope improve use quickly efficiently thank	Negative	Google Play Store	1	0	1
Google Play Store	b046d580-1732-47cc-80cc-bc422ea9b1a8	The application started causing my Huawei Y7 mobile phone to freeze.	عبده رشاد	##########			0	ar	us		1	ar	application start cause huawei mobile phone freeze	Negative	Google Play Store	0	1	1
Google Play Store	fc39c7ff-7b01-4e2e-9730-faf94a88eefe	The application has become very bad and slow after the latest update.	Waleed Ali	##########			2	ar	us		1	ar	application become bad slow late update	Negative	Google Play Store	1	0	1
Google Play Store	71602056-42ae-4d7a-b945-b2a3fc227eba	Sometimes the application crashes for no reason.	Tahaaaa Tahaaaaa	##########			0	ar	us		3	ar	sometimes application crash reason	Negative	Google Play Store	0	1	0
Google Play Store	83ef96c5-f250-47ff-a286-d63e78a43319	The application used to be acceptable, but now it has become bad. Every time I try to log in, I receive a message that the fingerprint is not matching, even before I place my fingerprint, then I press continue and the application locks. The issue needs to be addressed quickly.	Aladin Abushaar	##########			115	ar	us		1	ar	application use acceptable become bad every time try log receive message fingerprint match even place fingerprint press continue application lock issue need address quickly	Negative	Google Play Store	1	1	0
Google Play Store	d7c9683b-a155-474a-ad9c-662468e79a63	The comment is very strange and there is no response to solve the problem.	Ahmed alqahtany	##########			0	ar	us		1	ar	comment strange response solve problem	Negative	Google Play Store	1	0	0
Google Play Store	5e7cf518-f23c-41ec-b785-2a993a125ab8	The British bank is one of the worst banks. It is a foreign bank that colonizes and steals the country's wealth, and spreads usury. The bank cooperates with the ruler to harass opposition members and freeze their accounts. Personally, a bank employee threatened to freeze my account and the call is recorded. They always mistreat me in their branches and in phone banking. I have complained to the b…	احمد Ahmad	##########			0	ar	us		1	ar	british bank one bad bank foreign bank colonize steal countrys wealth spread usury bank cooperate ruler harass opposition members freeze account personally bank employee threaten freeze account call record always mistreat branch phone bank complain bank british bank foreign colonial bank prosecute expel country bank continue harass opponents writers expose government corruption bank freeze specia…	Negative	Google Play Store	1	0	1
Google Play Store	89466445-4016-477b-8698-0d2c23978412	After the new update, it has become very bad, slow, and it freezes a lot. We hope the problem can be resolved.	لحافات بيرلا	##########			2	ar	us		5	ar	new update become bad slow freeze lot hope problem resolve	Negative	Google Play Store	1	0	1
Google Play Store	d697bddc-cbaf-4a71-8816-526296542198	Very slow and hangs a lot.	علي الصايغ	##########			0	ar	us		2	ar	slow hang lot	Negative	Google Play Store	0	0	1
Google Play Store	b1792c14-3ba6-4ef6-85fd-bc9dad5ccf37	A very bad program and I didn't benefit from the bank's services because it didn't work on mobile. The decision to merge SABB and Alawwal Bank was the worst. The first program was excellent and never froze or refused entry. The rating is less than one star.	عبدالله الشهري	##########			0	ar	us		1	ar	bad program didnt benefit bank service didnt work mobile decision merge sabb alawwal bank bad first program excellent never freeze refuse entry rat less one star	Negative	Google Play Store	1	1	0
Google Play Store	511af945-3090-4167-a0c0-b40a125bff8e	The application is going from bad to worse.	الشيخ ياسين الأزهري	##########			0	ar	us		1	ar	application go bad bad	Negative	Google Play Store	1	0	0
Google Play Store	35e8d1b1-c434-435b-8d2d-d0a4635af4d4	Very bad, I am feeling very tired.	Ismail ALghamdi	##########			0	ar	us		1	ar	bad feel tire	Negative	Google Play Store	1	0	0
Google Play Store	2fbe8865-c5dc-46a9-ba4f-8d4d3124ec89	The application freezes and is very slow. I hope this problem can be resolved.	خالد عسيري	##########			1	ar	us		1	ar	application freeze slow hope problem resolve	Negative	Google Play Store	1	0	1
Google Play Store	5fe14da9-7425-464e-87f2-b98e44566267	Honestly, the bank has become helpless in front of the application designer, as if it is under the control of the designer and keeps it going with this lousy application. May God bless the French, Ahli, and Bilad bank applications, as they are user-friendly, smooth, and secure without needing to use Google search. And the strange thing is that the designer reads all the comments and ignores every…	مهاب نجيب	##########			0	ar	us		1	ar	honestly bank become helpless front application designer control designer keep go lousy application may god bless french ahli bilad bank applications userfriendly smooth secure without need use google search strange thing designer read comment ignore everyone	Negative	Google Play Store	1	0	0
Google Play Store	14a2ddbf-778f-464a-bd59-32f5a78df2b7	Update the amounts daily update	Hassan al-hajri	##########			0	ar	us		1	ar	update amount daily update	Neutral	Google Play Store	0	0	1
Google Play Store	2b75c0cd-9ad1-42d7-8bcf-f461dbe16ecb	One of the worst banking applications I have ever dealt with is an extremely bad and primitive application to the point that it is very frustrating to use. It is complicated to navigate and deserves the award for the worst application of the year.	أبو راكان السيد	##########			2	ar	us		1	ar	one bad bank applications ever deal extremely bad primitive application point frustrate use complicate navigate deserve award bad application year	Negative	Google Play Store	1	0	0
Google Play Store	99178625-1a65-4fed-b247-68c778e97c1a	Great very much	ALBARON TOP	##########			0	ar	us		1	ar	great much	Positive	Google Play Store	0	0	0
Google Play Store	45fd547a-1869-4911-bdf5-4df4d709fed6	Very bad, every month an update.	F M	##########			0	ar	us		1	ar	bad every month update	Negative	Google Play Store	1	0	0
Google Play Store	93ed5d31-6074-41f4-b6bd-c49f77308eae	Terrible in every sense, the worst banking application I have ever encountered.	Mohi M	##########			0	ar	us		1	ar	terrible every sense bad bank application ever encounter	Negative	Google Play Store	1	0	0
Google Play Store	e4243889-445a-46e5-93b3-567eba4063f2	Excellent.	osama atta	##########			0	ar	us		5	ar	excellent	Positive	Google Play Store	0	0	0
Google Play Store	ed1d06c5-87cc-4c1c-a936-7010fa435eee	Updating every few days is useless because the application is very bad.	محمد برهان كيالي	##########			1	ar	us		1	ar	update every days useless application bad	Negative	Google Play Store	1	1	0
Google Play Store	089b57c4-b603-4832-9f1d-471c2da62a12	"Update every two days."	MOHAMMAD AHMED	##########			0	ar	us		2	ar	update every two days	Neutral	Google Play Store	0	1	0
Google Play Store	ac28fa0e-82b2-4999-810a-c8da9d223f64	The problem is that it keeps asking for an update every five days. It would be nice if you could solve this issue, SAP.	Bader Al Omran	##########			1	ar	us		1	ar	problem keep ask update every five days would nice could solve issue sap	Negative	Google Play Store	0	1	0
Google Play Store	98c5791a-226f-4dca-9c32-90674dc6c4d0	Excellent very much	سالم مبارك	##########			0	ar	us		4	ar	excellent much	Positive	Google Play Store	0	0	0
Google Play Store	879fb718-42f6-4709-a098-58273578ec75	To solve the problem of requesting geographic location activation, go to the SAP application from the settings. Open the application, go to the license section, and enable permission for the geographic location and SMS. That's it.	ساري ساري	##########			0	ar	us		4	ar	solve problem request geographic location activation go sap application settings open application go license section enable permission geographic location sms thats	Neutral	Google Play Store	0	1	0
Google Play Store	52f466f9-0261-4153-99f2-6ce4ebd08e5d	The program is very bad. It runs very slowly in both English and Arabic languages and it freezes.	MOHAMED ELABBASY	##########			2	ar	us		1	ar	program bad run slowly english arabic languages freeze	Negative	Google Play Store	1	0	1
Google Play Store	a4c48606-ad46-45c8-907f-9c57c8d59afc	I wish if you could make the login process with fingerprint recognition better and faster.	حسن علي	##########			2	ar	us		5	ar	wish could make login process fingerprint recognition good fast	Positive	Google Play Store	0	1	0
Google Play Store	f69d48e5-b249-4f2a-9f5b-41364b39ede5	Unfortunately, your application needs a lot of improvements and modifications as it frequently crashes and closes on us abruptly in the middle of our tasks.	3YS	##########			2	ar	us		1	ar	unfortunately application need lot improvements modifications frequently crash close us abruptly middle task	Negative	Google Play Store	1	1	1
Google Play Store	a8c94a8e-bcc7-4633-a367-57be37fb1100	I don't see why every time I open the application it asks me to enable location. What does it matter to you where I am? Are you planning to have coffee with me or something?	ابو ياسر	##########			0	ar	us		1	ar	dont see every time open application ask enable location matter plan coffee something	Negative	Google Play Store	0	1	0
Google Play Store	49bf7a2f-1527-457e-9a2a-9e9504837123	The application is very slow and hangs, I do not recommend it.	a abotair	##########			0	ar	us		1	ar	application slow hang recommend	Negative	Google Play Store	1	0	1
Google Play Store	78e5c0f5-b66b-4d63-be08-9e0dac2269df	The application is bad and crashes a lot.	jehad al-marri	##########			1	ar	us		1	ar	application bad crash lot	Negative	Google Play Store	1	1	0
Google Play Store	27263236-870d-4f21-a1a3-58d354b7d637	Good	Ahmed Ahmed	##########			0	ar	us		4	ar	good	Positive	Google Play Store	0	0	0
Google Play Store	f49ac2c8-24b8-4fb3-a1b7-3c9a71c1bb9e	Foul (an expression of disgust or disapproval)	واصل البوعويس	##########			0	ar	us		1	ar	foul expression disgust disapproval	Negative	Google Play Store	1	0	0
Google Play Store	3c4753be-053a-4428-914e-07fee13b65f2	The application has become better after development, easier to use, and I highly recommend it.	Om Rakan	##########			9	ar	us		5	ar	application become good development easy use highly recommend	Positive	Google Play Store	0	0	0
Google Play Store	c6ddddcc-f7d9-4e0b-bf45-6ece9b0c570c	The latest version is bad; payment, transfer, and logout operations are not functioning properly. Disabling the account is also bad, very bad. Please update the program and make necessary adjustments.	الكليب محمد	##########			1	ar	us		1	ar	late version bad payment transfer logout operations function properly disable account also bad bad please update program make necessary adjustments	Negative	Google Play Store	1	1	0
Google Play Store	62911098-e343-4f71-924f-92ab66d5a3c5	A wonderful application.	ميمي Mymy	##########			0	ar	us		5	ar	wonderful application	Positive	Google Play Store	0	0	0
Google Play Store	91a5b06e-d68a-4718-afba-45425e3793f7	Thank you, SAAB Bank.	Abdou shot	##########			0	ar	us		5	ar	thank saab bank	Positive	Google Play Store	0	0	0
Google Play Store	1bd4558e-5372-4244-90e9-5e010bbc57c5	After the update, it became very bad and very slow.	azizmjd M	##########			1	ar	us		1	ar	update become bad slow	Negative	Google Play Store	1	0	1
Google Play Store	056a0513-8e1e-4af9-aa42-7b0770984c44	Very, very bad and I couldn't access my account.	محمد الفيفي	##########			0	ar	us		1	ar	bad couldnt access account	Negative	Google Play Store	1	1	0
Google Play Store	2b7c9816-ca06-4e58-a60a-3edf5c8643d2	A very bad experience, the worstprogram and a bank that is not far from the program.	Mohammed ALabdullah	##########			0	ar	us		1	ar	bad experience worstprogram bank far program	Negative	Google Play Store	1	0	0
Google Play Store	81d3a837-86f9-44ab-b040-8cd141241339	I don't speak Arabic.	حسن القلاف	##########			0	ar	us		1	ar	dont speak arabic	Neutral	Google Play Store	0	1	0
Google Play Store	47e8a00d-d393-472b-82e8-817242f30e7f	I hope that the verification code is entered automatically, like before. Thank you.	Khalid m. m	##########			1	ar	us		4	ar	hope verification code enter automatically like thank	Neutral	Google Play Store	0	1	0
Google Play Store	b1d488b7-cfaa-4d23-b8ab-e45aaa5770f3	Wonderful	Ali Al Mubarak	##########			0	ar	us		5	ar	wonderful	Positive	Google Play Store	0	0	0
Google Play Store	917edda3-436c-471b-84a8-a5abfd2819de	Good.	laila Alahmadi	##########			0	ar	us		5	ar	good	Positive	Google Play Store	0	0	0
Google Play Store	e23818df-a018-43e7-a002-0f918c040bf0	Every update is worse than the previous one. The application has been completely disabled for over two weeks now, disrupting our work. Shame on you, seriously.	Ibrahim Mahmoud	##########			0	ar	us		1	ar	every update bad previous one application completely disable two weeks disrupt work shame seriously	Negative	Google Play Store	1	1	0
Google Play Store	5122ddf7-db75-4108-9d2e-260d8284a9eb	A failure, a failure indeed. By Allah, the worst. Always requesting to activate the website while it is already activated. The application options are either to stop or cancel the application.	Fahd Saleh	##########			0	ar	us		1	ar	failure failure indeed allah bad always request activate website already activate application options either stop cancel application	Negative	Google Play Store	1	1	0
Google Play Store	75a3d114-645e-4013-89f8-36b8fa048d85	Unfortunately, after the update, the application no longer works and prompts for location activation. What is the benefit of activating it?	ابو محمد	##########			0	ar	us		1	ar	unfortunately update application long work prompt location activation benefit activate	Negative	Google Play Store	0	1	0
Google Play Store	4e147a83-8607-4296-ad42-d17afac3c9d9	After the update, the program is not working.	A S	##########			2	ar	us		1	ar	update program work	Negative	Google Play Store	0	1	0
Google Play Store	a5e0362c-cdad-4413-b7b0-7a18954621d6	The app is very bad, it asks for location but doesn't open. It's really really bad.	Roossa A.H.A	##########			2	ar	us		1	ar	app bad ask location doesnt open really really bad	Negative	Google Play Store	1	1	0
Google Play Store	40597432-1e4e-47b2-9d36-a0c50523ab09	After the update, I was denied entry multiple times due to location tracking. Please hurry up and fix this issue because it's becoming unbearable!	SM7- Fabad	##########			0	ar	us		1	ar	update deny entry multiple time due location track please hurry fix issue become unbearable	Negative	Google Play Store	1	1	0
Google Play Store	c73928d0-5f7b-42d4-ae1e-e9be5b8962a6	I am not able to write and I am surprised by the SAP application, even though it is an old bank and their employees are known for their good service at their branches. However, their application is very basic, which is strange. I hope their designers can benefit from designing their application in the style of other banks such as Al Rajhi, Alinma, Al Ahli, and Al Bilad, where you can enjoy browsi…	انا انا	##########			0	ar	us		1	ar	able write surprise sap application even though old bank employees know good service branch however application basic strange hope designers benefit design application style bank al rajhi alinma al ahli al bilad enjoy browse applications easily flexibly hope consider may god guide everyone	Negative	Google Play Store	1	0	0
Google Play Store	3655364e-6043-4594-8b99-6fc89b121e9c	An excellent application.	رجب علي	##########			0	ar	us		5	ar	excellent application	Positive	Google Play Store	0	0	0
Google Play Store	08037e69-03ca-4587-b3be-87beb4e07075	Previously, it was a unique application, but now it suffers from location tracking issues and difficulties in logging into the account, which many people are facing.	nmr harb	##########			4	ar	us		1	ar	previously unique application suffer location track issue difficulties log account many people face	Negative	Google Play Store	1	1	0
Google Play Store	29a7f4b7-2109-410f-867e-0b43afeef615	Not compatible with Galaxy S22 Ultra.	ابوحيدر امويس	##########			0	ar	us		1	ar	compatible galaxy ultra	Negative	Google Play Store	0	1	0
Google Play Store	f662da96-1ab5-4289-9213-f59339fdfdf7	Every time I enter the application, it says the application has activated the location feature. May God have mercy on your mother. Solve this problem please.	عبدالعزيز العسيري	##########			0	ar	us		1	ar	every time enter application say application activate location feature may god mercy mother solve problem please	Negative	Google Play Store	1	0	0
Google Play Store	5562a9d8-5e48-4734-9348-841bf36a3230	Very sad and inactive.	Mustafa Elaimony	##########			0	ar	us		1	ar	sad inactive	Negative	Google Play Store	1	0	0
Google Play Store	120e2100-2c0b-4b4d-852a-bf0fad2c0e73	Excellent application and easy to use.	Mubarak AL-Dossary	##########			0	ar	us		5	ar	excellent application easy use	Positive	Google Play Store	0	0	0
Google Play Store	d5087a67-78cc-4cc7-9d65-9f76977f1d12	Unfortunately, for two months now, the application has been hindering my login. At first, it used to verify the account owner and wait for a call, but I never received any call from the bank. And for a month now, the website has been causing trouble for everyone, and we are forced to access it through Google page, not through the application.	Huda ALTmimi	##########			5	ar	us		1	ar	unfortunately two months application hind login first use verify account owner wait call never receive call bank month website cause trouble everyone force access google page application	Negative	Google Play Store	1	1	0
Google Play Store	3170514e-d8a8-4b53-8b0a-31e382f564b5	Very bad application .. continuous and repetitive problems	Adnan AlSadah	##########			4	ar	us		1	ar	bad application continuous repetitive problems	Negative	Google Play Store	1	0	1
Google Play Store	6d082592-1433-4777-b8eb-a7f44cb6157b	Excellent	hussain ALOWA	##########			0	ar	us		5	ar	excellent	Positive	Google Play Store	0	0	0
Google Play Store	f79efe99-bc76-41f8-b8e4-3ded85823208	Good.	H.bomouzah Al_Ali	##########			0	ar	us		5	ar	good	Positive	Google Play Store	0	0	0
Google Play Store	ce9adc68-2b80-42ce-8108-46714edb4884	The application now asks for location permission and doesn't work!	Rash R	##########			0	ar	us		5	ar	application ask location permission doesnt work	Negative	Google Play Store	0	1	0
Google Play Store	9b7c8dbe-7373-4108-8dad-698b00bcb4b8	The app is very bad, it suffers from many problems, the most important of which is the very slow navigation between pages, to the point that the app kicks you out. 📵	إبراهيم عبدالله	##########			2	ar	us		2	ar	app bad suffer many problems important slow navigation page point app kick	Negative	Google Play Store	1	1	1
Google Play Store	cd67e6ea-db64-4169-b293-3fd2777e3125	Very bad, heavy, and it forces you to open the website.	جابر ال شرمه	##########			0	ar	us		1	ar	bad heavy force open website	Negative	Google Play Store	1	0	0
Google Play Store	6eaf4ea0-d52a-47b5-9c3b-89326b75daf2	Excellent	ابويزيد حمد	##########			0	ar	us		5	ar	excellent	Positive	Google Play Store	0	0	0
Google Play Store	c5f4b353-fb95-4966-a89c-2b2286cf30ab	Excellent.	سكينة عبداللطيف العلق	##########			0	ar	us		5	ar	excellent	Positive	Google Play Store	0	0	0
Google Play Store	2834ba9c-9560-4a78-bbf8-16aaccf05e09	Amazing	A Z	##########			0	ar	us		4	ar	amaze	Positive	Google Play Store	0	0	0
Google Play Store	2c5a6c05-cfb7-4242-a7d2-7b0a5a6a752d	Very unfortunate, there are frequent updates but no progress. On the contrary, it was better before.	سلمان عميرة	##########			2	ar	us		1	ar	unfortunate frequent update progress contrary good	Negative	Google Play Store	1	0	0
Google Play Store	9cb0f022-9ac9-4863-a682-948dfb3c25e5	I am very tired and exhausted from all my work.	ايمن الشريف	##########			0	ar	us		1	ar	tire exhaust work	Negative	Google Play Store	0	1	0
Google Play Store	026c5bbb-04dc-4b2e-8b46-666115ea13a8	"The application is worse than bad. I am surprised by the updates in it without notifying the customers, even though communication channels are available at the bank, including login messages. It has become difficult, I don't know the purpose of adding the location feature."	Turki Alaamri	##########			18	ar	us		1	ar	application bad bad surprise update without notify customers even though communication channel available bank include login message become difficult dont know purpose add location feature	Negative	Google Play Store	1	1	0
Google Play Store	c8c936ad-928d-46d3-b28d-1d1cdcc03ead	Good.	ads jhfjf	##########			0	ar	us		5	ar	good	Positive	Google Play Store	0	0	0
Google Play Store	2f0a3495-3d45-41a5-8d69-6b79d28ab944	Bad and worse than bad itself.	bnder basel	##########			0	ar	us		1	ar	bad bad bad	Negative	Google Play Store	1	0	0
Google Play Store	794bc8d9-94aa-4abf-b15b-3d8bf7341b32	Excellent, thank you.	Ahmed Bazroon	##########			0	ar	us		5	ar	excellent thank	Positive	Google Play Store	0	0	0
Google Play Store	c1d27add-7ae8-43d5-abbf-815e39fe5d9a	And then, I mean how long will it take before your application starts working? Are you sure you are a bank? Restaurant applications are better than yours, I swear by Allah.	محمد ابو تركي	##########			0	ar	us		1	ar	mean long take application start work sure bank restaurant applications good swear allah	Negative	Google Play Store	1	0	1
Google Play Store	db4de772-5e53-4be8-bab6-e20040b5012c	Each update period of the CR application, please solve the problem of not updating.	1984 ابراهيم	##########			2	ar	us		1	ar	update period cr application please solve problem update	Neutral	Google Play Store	0	1	0
Google Play Store	5fb021ef-3ca2-41e3-9d33-76e6e0df4e0b	Easy and safe.	عبدالله الدوسرى	##########			0	ar	us		5	ar	easy safe	Positive	Google Play Store	0	0	0
Google Play Store	8a6bd07b-7d83-488b-ab53-0c289a4bcaf3	Very bad.	Khaled	##########			0	ar	us		1	ar	bad	Negative	Google Play Store	1	0	0
Google Play Store	f2a4f781-5edc-4e87-96f3-876d08f31d01	Program for the first time I see a lot of updates in it. We kindly request you to solve this problem. Thank you very much for your understanding, appreciation, respect, and may God bless you.	جابر ابوحية	##########			0	ar	us		5	ar	program first time see lot update kindly request solve problem thank much understand appreciation respect may god bless	Positive	Google Play Store	0	1	0
Google Play Store	87aaf74f-9a9f-4466-91cd-dc5b1aa765e6	From the best to the best 🌟	أبو يوسف	##########			0	ar	us		5	ar	best best	Positive	Google Play Store	0	0	0
Google Play Store	47a1715d-881f-47e4-92a7-8d7e3b0edba4	What's the story behind location determination?	Nasser Alhussain	##########			0	ar	us		1	ar	whats story behind location determination	Neutral	Google Play Store	0	0	0
Google Play Store	f2e8925a-2db0-4c94-8af4-30680422cdc3	Good	aziz mozaini	##########			0	ar	us		3	ar	good	Positive	Google Play Store	0	0	0
Google Play Store	fbd2e463-c2fe-4aa1-a061-64f1ca061065	Very bad	Khaled Jaber	##########			0	ar	us		1	ar	bad	Negative	Google Play Store	1	0	0
Google Play Store	bb6ca5d7-85a4-49df-b8d1-35228baed3af	Still under the new system, it is necessary to keep up with other banks such as Al-Rajhi and Al-Ahli and their ease of use.	العدواني العدواني	##########			0	ar	us		1	ar	still new system necessary keep bank alrajhi alahli ease use	Neutral	Google Play Store	1	0	0
Google Play Store	9c3549b9-ce6a-4e33-bd53-fcffc3bfc7ec	When logging in, I am asked to specify the location, and when I press the location button, it redirects me to the application's data, knowing that the location is enabled. I am unable to access my account that does not deserve and does not have a star.	‪Dal Ad‬‏	##########			4	ar	us		1	ar	log ask specify location press location button redirect applications data know location enable unable access account deserve star	Negative	Google Play Store	0	1	0
Google Play Store	7c3fe9c1-e8ef-46f7-8e2b-58cf72a4c448	I ...	ف ف ف ف ف ف ف	##########			0	ar	us		5	ar		Neutral	Google Play Store	0	0	0
Google Play Store	ac95f2d8-63d1-4596-911b-fb115b429925	Unfortunately, the application is very bad and complicated. Every time I try to log into my account, it takes me back to refreshing the current website and this keeps happening continuously. Other banks have more practical and easy-to-use electronic platforms; the complexity used by this bank reflects badly on them.	mohammad abooahmad	##########			11	ar	us		1	ar	unfortunately application bad complicate every time try log account take back refresh current website keep happen continuously bank practical easytouse electronic platforms complexity use bank reflect badly	Negative	Google Play Store	1	0	0
Google Play Store	38e6d1c5-60ac-48c7-9607-e311e5abdf6e	The program is bad after the update, it asks me to specify the location even though the location is working and this is happening without the application opening.	Ajalil Shabib	##########			4	ar	us		1	ar	program bad update ask specify location even though location work happen without application open	Negative	Google Play Store	1	1	0
Google Play Store	b2f09db3-db67-43af-95b7-0cbebb6583b6	The application is not working.	Majed Alessa	##########			0	ar	us		1	ar	application work	Negative	Google Play Store	0	1	0
Google Play Store	a7ea5956-83a4-4374-911e-4ccb13cb4ff0	Every two days, these games do not update in this way.	Ahmad Hammad	##########			0	ar	us		1	ar	every two days game update way	Negative	Google Play Store	1	0	0
Google Play Store	438ca488-bf13-4275-b4dd-f7120e5cb801	It does not work.	احمد الهويدفي	##########			0	ar	us		1	ar	work	Negative	Google Play Store	0	1	0
Google Play Store	f6a2d8bc-6189-4691-9879-013071d10300	The application review update does not work after the update.	محمد أبو قصي	##########			1	ar	us		1	ar	application review update work update	Negative	Google Play Store	0	1	0
Google Play Store	05ff5d66-109e-482d-a982-e832da667fa6	When updating the data, it was not saved and a notification is triggered to update the data. Please solve the problem. It would be better if you keep the update for at least a month, rather than updating every 10 days.	عيسى ربوع	##########			29	ar	us		3	ar	update data save notification trigger update data please solve problem would good keep update least month rather update every days	Negative	Google Play Store	1	1	0
Google Play Store	b498d9e1-6ea7-40a4-9ee9-48d324bc2cde	It is not possible to perform any procedures for all the bank channels, whether phone banking, online banking, or the application, if the systems are not compromised.	Yasser Alhujiliy	##########			0	ar	us		1	ar	possible perform procedures bank channel whether phone bank online bank application systems compromise	Negative	Google Play Store	1	1	0
Google Play Store	8deeabc0-9ac3-4972-85ff-d91d0f4f946e	The problem still exists even after the update. It keeps asking me to run the website, but I have already done that. This problem prevents me from accessing the application. Please fix the issue.	الحمد لله	##########			0	ar	us		1	ar	problem still exist even update keep ask run website already do problem prevent access application please fix issue	Negative	Google Play Store	0	1	0
Google Play Store	e337a095-96a4-424f-915c-c1f6be6906e0	The program is very bad and not working. It asks for activating the website service.	reda Omar	##########			4	ar	us		1	ar	program bad work ask activate website service	Negative	Google Play Store	1	1	0
Google Play Store	1b9c0877-e675-4a7d-b283-3323a99e0a46	Very bad. Every time I need to use the app, it comes up with new requirements that hinder my work. The latest one was requesting to determine my current location. I did that, but it still doesn't work and it disrupts my work. Until when will these malfunctions continue?	Faisal Bayoumi	##########			108	ar	us		1	ar	bad every time need use app come new requirements hind work late one request determine current location still doesnt work disrupt work malfunction continue	Negative	Google Play Store	1	1	0
Google Play Store	3cf6448f-3ed3-404b-b8c4-1106e6c13e27	It is not opening and the message for the code does not come, I deleted the application and then reinstalled it, but the same problem persists.	Abdullah Ali	##########			0	ar	us		1	ar	open message code come delete application reinstall problem persist	Negative	Google Play Store	0	1	0
Google Play Store	646e7e4a-2f60-4b6b-88ca-824d9d010ba6	It is very bad, he asks for a website update and it does not open, I rate it zero.	sukina Manameen	##########			0	ar	us		1	ar	bad ask website update open rate zero	Negative	Google Play Store	1	1	0
Google Play Store	a04b8013-4c33-4056-9969-f8ccb4cbd047	The application asks for location identification despite already having location services activated, but the application itself is not working. The situation has worsened.	SayanG4ü	##########			0	ar	us		1	ar	application ask location identification despite already location service activate application work situation worsen	Negative	Google Play Store	0	1	0
Google Play Store	b1ca295b-c5c7-466c-98b1-2e1fd38a6710	The second best banking application.	عبد الله بروهي	##########			0	ar	us		5	ar	second best bank application	Positive	Google Play Store	0	0	0
Google Play Store	245877d1-2d69-4ff6-a1f1-074c886e5c0f	I swear to God, you are driving us crazy with these updates every day. Now it refuses to access anything other than the website, and it refuses to withdraw or transfer from the bank and the application. The card still has a year remaining, and customer support says there is no problem, and the bank is the same. So where is the problem? The problem is that we have been dealing with you for 25 year…	هايل الشمري alshammare	##########			0	ar	us		1	ar	swear god drive us crazy update every day refuse access anything website refuse withdraw transfer bank application card still year remain customer support say problem bank problem problem deal years bank change since yesterday	Negative	Google Play Store	1	1	0
Google Play Store	67013f32-d534-4410-a4c0-3f0d888c0538	Bad and unsuccessful after the last update. It asks for website activation, but the website is already activated and it is not possible to access the application. Please solve the problem as soon as possible.	Abood Gladiator	##########			18	ar	us		1	ar	bad unsuccessful last update ask website activation website already activate possible access application please solve problem soon possible	Negative	Google Play Store	1	1	0
Google Play Store	d5727ab6-6975-43bb-89c8-3c7724e685c6	Bad update and there is no need for complexity. For those who want to know how to enable location tracking on their Galaxy mobile, go to (App Permissions), then (Location), then (Allow app to access your location). It should work for you, God willing. Good luck!	yarub A	##########			0	ar	us		1	ar	bad update need complexity want know enable location track galaxy mobile go app permissions location allow app access location work god will good luck	Positive	Google Play Store	1	1	0
Google Play Store	f04b02e3-bae7-4e45-a4bd-871dc58fc5c2	Someone answer us any software problem.	Ibrahim Hassan	##########			0	ar	us		1	ar	someone answer us software problem	Neutral	Google Play Store	1	1	0
Google Play Store	7368ebdd-c668-47bb-ad36-9ad698f7d3e0	For over a week, it doesn't open with me. Choose your location and the same thing happens to me when withdrawing money from the bank. Oh, the many technical problems it has.	Mohammed Doman	##########			0	ar	us		1	ar	week doesnt open choose location thing happen withdraw money bank oh many technical problems	Negative	Google Play Store	0	1	0
Google Play Store	0bfb2469-9968-43c1-9b36-67e7735948ae	The matter has escalated beyond its limits.. It is a bad and boring application until when will it be disabled..!	Sattam 1214	##########			2	ar	us		1	ar	matter escalate beyond limit bad bore application disable	Negative	Google Play Store	1	0	0
Google Play Store	484c79a4-68c8-4bda-855d-4cd53b58e2b5	The program does not open. Please find a solution.	Madiha Ss	##########			0	ar	us		1	ar	program open please find solution	Negative	Google Play Store	0	1	0
Google Play Store	3f8a44a9-fec6-4be3-ad10-6fc618577030	The application has become bad. What does it concern you if I use VPN or not? And you want to forcibly determine my location, this is a violation of privacy. It is not safe, I will transfer to another bank.	Mohammd Hak	##########			0	ar	us		1	ar	application become bad concern use vpn want forcibly determine location violation privacy safe transfer another bank	Negative	Google Play Store	1	1	0
Google Play Store	f6607b14-e30f-41df-80ff-18579d049151	It seems that there is a problem with the Android app in determining the location. The program keeps asking for location permission, and when approved, it takes you back to the interface and repeats this request. Please solve this terrible problem for this bank.	علي الحازمي	##########			0	ar	us		1	ar	seem problem android app determine location program keep ask location permission approve take back interface repeat request please solve terrible problem bank	Negative	Google Play Store	1	1	0
Google Play Store	72b7e1b7-1ffe-4dda-8c50-f175d29e58e2	The program is very bad, after the update it didn't recognize my device and I couldn't access my account or the bank itself. It is not able to solve the problem for me.	أبوعزام الجديع	##########			34	ar	us		1	ar	program bad update didnt recognize device couldnt access account bank able solve problem	Negative	Google Play Store	1	1	0
Google Play Store	0b394230-94f6-4fcb-9061-a88dd5cb833d	Updates have increased, and using the application has become difficult. Every time you enter, it asks for permission to access everything on the phone.	Khalid -AlRayes	##########			0	ar	us		1	ar	update increase use application become difficult every time enter ask permission access everything phone	Negative	Google Play Store	1	1	0
Google Play Store	94e4ac39-7615-4cb0-b424-5be465b8db45	After the new update, the application is not working.	Alone	##########			0	ar	us		1	ar	new update application work	Negative	Google Play Store	0	1	0
Google Play Store	e3934986-3286-4f00-9117-02e924a95359	The best solution is to close the account because it has become very bad in all electronic transactions.	H bgdade	##########			3	ar	us		1	ar	best solution close account become bad electronic transactions	Negative	Google Play Store	1	0	0
Google Play Store	1b7d0f5c-e0dc-4ec6-9cc8-02ff3a2f6674	"Very easy to use and very beautiful application."	Ali Ismail	##########			0	ar	us		5	ar	easy use beautiful application	Positive	Google Play Store	0	0	0
Google Play Store	28d8a392-a3de-446c-b8fb-52ac4d5953e8	The application is very bad, it does not open.	Vuri Vu	##########			0	ar	us		1	ar	application bad open	Negative	Google Play Store	1	1	0
Google Play Store	01762944-7c51-4bd8-8c95-14684826a791	The website is always being requested even though it is functional.	Mohammed	##########			1	ar	us		1	ar	website always request even though functional	Neutral	Google Play Store	0	1	0
Google Play Store	248267eb-9e81-4546-9cd0-6214649e7009	The program asks for specifying a location that became boring.	omar bajaba	##########			0	ar	us		1	ar	program ask specify location become bore	Negative	Google Play Store	1	0	0
Google Play Store	f1565576-5c6e-4485-ad55-b2403805259f	Bad, it asks for location.	Abdullah I	##########			0	ar	us		5	ar	bad ask location	Negative	Google Play Store	1	0	0
Google Play Store	273c0235-c388-4dcf-a29d-d6aef7bccfa2	It's very frustrating to have a feature that requests location identification, especially when it's already activated and I enable it, but it still doesn't work and continuously prompts for updates without any improvement, except for making it more difficult to access the application.	Rozana Nooh	##########			5	ar	us		1	ar	frustrate feature request location identification especially already activate enable still doesnt work continuously prompt update without improvement except make difficult access application	Negative	Google Play Store	1	1	0
Google Play Store	400c97da-10e0-4ff3-9b03-9ddb723c71e8	Very bad application and it does not work, especially after the recent update.	ashraf albanby	##########			0	ar	us		1	ar	bad application work especially recent update	Negative	Google Play Store	1	1	0
Google Play Store	0d8b4d98-5e83-46a2-a2fe-f9cc0e3a6894	With the latest update, the application does not work for me and does not open at all. It asks me to open the website, knowing that it is already open.	السيد الشرقاوى	##########			5	ar	us		1	ar	late update application work open ask open website know already open	Negative	Google Play Store	0	1	0
Google Play Store	6a2c1966-7b23-41c6-9074-ff42627bbfe3	It doesn't work, it's a waste of time. Their start is like this, I stop trying, my salary is just like Al-Ahli bank, it's complicated. The website is not working and I haven't found a solution with them. May Allah not bless them for wasting time and signing contracts before submitting all the documents.	الراقي الملكي	##########			0	ar	us		1	ar	doesnt work waste time start like stop try salary like alahli bank complicate website work havent find solution may allah bless waste time sign contract submit document	Negative	Google Play Store	1	1	1
Google Play Store	ee05b7ff-34fc-490c-95c0-887fc1402d00	It's really bad, it asks for updates and location settings but still doesn't open. Please download a new application for the need.	Abeer Rashed	##########			0	ar	us		1	ar	really bad ask update location settings still doesnt open please download new application need	Negative	Google Play Store	1	1	0
Google Play Store	3fadb9f8-8150-4334-bc71-cfb497c0120f	Every other day there is an update, but it doesn't work and the bank's treatment of its customers is bad in all aspects. How much longer, Saab Bank?????	Abdullah AlShaiban 2020	##########			0	ar	us		1	ar	every day update doesnt work bank treatment customers bad aspects much long saab bank	Negative	Google Play Store	1	1	0
Google Play Store	36afb4fa-6202-49b8-a03c-044181b34928	The application is not working, please fix the problem.	مستخدم Google	##########			0	ar	us		1	ar	application work please fix problem	Negative	Google Play Store	0	1	0
Google Play Store	cacdb95b-93ec-487b-b8c7-849fc9bf5cd2	It became bad after the update; every time I try to transfer, it kicks me out of the application or when I try to transfer via IBAN, it kicks me out of the application. It's unbearable.	abodi1297 al-g	##########			0	ar	us		1	ar	become bad update every time try transfer kick application try transfer via iban kick application unbearable	Negative	Google Play Store	1	1	0
Google Play Store	b92ed273-848f-4368-ae69-dea2f73c1a59	Excellent and comprehensive, just missing a store to make it extraordinary.	الكوتش ابو فهد C.abofahad	##########			0	ar	us		5	ar	excellent comprehensive miss store make extraordinary	Positive	Google Play Store	0	0	0
Google Play Store	ca927692-172b-4620-9681-f4028545a0fe	There is a problem, I cannot access the application. It asks me to specify my location, but my location is working correctly.	adel alamri	##########			0	ar	us		5	ar	problem access application ask specify location location work correctly	Negative	Google Play Store	0	1	0
Google Play Store	bcf1c134-3999-4987-8703-e256df37f401	Excellent	Majed Sayegh	##########			0	ar	us		5	ar	excellent	Positive	Google Play Store	0	0	0
Google Play Store	6a609cff-3235-4d6a-845c-d2d50eaa669e	Very bad.	ابو راكان 007	##########			0	ar	us		1	ar	bad	Negative	Google Play Store	1	0	0
Google Play Store	9902cc96-d8b6-40ce-bc37-44298e5209fb	One star just for the comment. It doesn't deserve a daily update worse than the previous one. Every time I try to do something, it kicks me out of the app. The banking phone service only responds with an automated message saying I don't have a secret code for the banking phone service, even though I've been using it for 15 years. Improve your situation or there are plenty of other banks to learn …	adel alabdly	##########			0	ar	us		1	ar	one star comment doesnt deserve daily update bad previous one every time try something kick app bank phone service respond automate message say dont secret code bank phone service even though ive use years improve situation plenty bank learn al rajhi issue despite many customers	Negative	Google Play Store	1	0	0
Google Play Store	af361461-cee6-47ca-897c-4396e4863a2b	The application is not working. It asks for location activation, but it is already activated.	مستخدم Google	##########			2	ar	us		1	ar	application work ask location activation already activate	Negative	Google Play Store	0	1	0
Google Play Store	ad0c19fa-1f93-4cae-9961-1749e132ae13	The bank used to be excellent and the service was excellent until an update was made. I cannot log in, it keeps asking to repeatedly pinpoint the location even though it is pinpointed correctly and active. However, I cannot access the application and there are no services that require location pinpointing.	عبد الرحمن الصعيدي (ابو ياسر)	##########			8	ar	us		2	ar	bank use excellent service excellent update make log keep ask repeatedly pinpoint location even though pinpoint correctly active however access application service require location pinpoint	Negative	Google Play Store	1	1	0
Google Play Store	b992ec93-5ed1-4ee7-9acc-cdba65752e65	Unfortunately, accessing the website has become unbearable.	mr. Saud	##########			0	ar	us		1	ar	unfortunately access website become unbearable	Negative	Google Play Store	1	0	0
Google Play Store	8a0145ac-b382-4fe5-af49-8000d4c1cb82	If I could rate it less than one star, I would have made it the worst application. It constantly needs updates, and it always freezes. I have been trying to activate the website for a few days now, but it won't open for me.	ايمان Em	##########			0	ar	us		1	ar	could rate less one star would make bad application constantly need update always freeze try activate website days wont open	Negative	Google Play Store	1	1	1
Google Play Store	b01cfb96-8223-4ebe-8a24-ba79e9deca55	It has become impossible to access the application. It requests the location, although the location is active, and it does not enter. The updates have a significant impact on the customers. Why underestimate the customers? I am thinking of switching to another bank because it does not meet my needs. Each update is worse than the previous one.	Fadi Alnajjar	##########			0	ar	us		1	ar	become impossible access application request location although location active enter update significant impact customers underestimate customers think switch another bank meet need update bad previous one	Negative	Google Play Store	1	1	0
Google Play Store	e6a95939-fa6a-43b3-b474-85b78b05ef71	It lacks some settings.	ali aluthmany	##########			1	ar	us		1	ar	lack settings	Negative	Google Play Store	0	1	1
Google Play Store	23926cc2-7a70-409d-ae72-5a8f5fd087e3	"Trashy application, extremely, extremely, extremely, extremely, extremely, extremely, extremely, extremely."	Saeed Saeed	##########			0	ar	us		1	ar	trashy application extremely extremely extremely extremely extremely extremely extremely extremely	Negative	Google Play Store	1	0	0
Google Play Store	a36640b2-c59e-4d32-980c-159ff053ecf7	By God, it has become very annoying. I have to keep pulling their trashy application every day for updates and it keeps crashing, its stench has reached unbearable levels.	Abudlaziz Ahmad	##########			0	ar	us		1	ar	god become annoy keep pull trashy application every day update keep crash stench reach unbearable level	Negative	Google Play Store	1	1	0
Google Play Store	6b2f9fc1-c5d0-4de2-b137-efe05a8813b5	The situation is very annoying. The app used to be one of the best apps for me, but now it's not working. It keeps asking me for my location even though my location services are enabled. Please solve this problem quickly.	Hani ALhanoon Electrical engineer	##########			3	ar	us		1	ar	situation annoy app use one best apps work keep ask location even though location service enable please solve problem quickly	Negative	Google Play Store	1	1	0
Google Play Store	aaad2641-556c-47c9-ad3a-faf3c9e21473	Very bad application with frequent updates, and some of the application's features do not work on Android devices.	Ad Ad	##########			0	ar	us		1	ar	bad application frequent update applications feature work android devices	Negative	Google Play Store	1	1	0
Google Play Store	0d962a1a-65ef-4b4b-a8d8-4f29bb376db5	Everything goes wrong every time we try to activate the website, and even when we do activate it, there is still no response from anyone.	Hannoodah a g	##########			2	ar	us		1	ar	everything go wrong every time try activate website even activate still response anyone	Negative	Google Play Store	0	1	0
Google Play Store	51bbf982-8d33-4b80-9697-c77339005b1c	The application does not open, why? What should I do? My affairs have been disrupted. This is the worstbank, every day there is an update and the application does not respond. Please advise us.	انور شحاته	##########			0	ar	us		1	ar	application open affairs disrupt worstbank every day update application respond please advise us	Negative	Google Play Store	1	1	0
Google Play Store	6ad3c33d-b910-4980-8ccd-27ee92646b70	What is the problem with location detection in the app? I have enabled location detection, but it keeps saying "enter the application".	هيثم الناطور	##########			0	ar	us		1	ar	problem location detection app enable location detection keep say enter application	Negative	Google Play Store	0	1	0
Google Play Store	cc13dcee-fc39-48c5-8eb0-b126de2ada4f	With the new update, it asks for location to be specified and the location is already specified. What is the solution to open the application?	abdallah aboulfotouh	##########			0	ar	us		2	ar	new update ask location specify location already specify solution open application	Neutral	Google Play Store	0	1	0
Google Play Store	39e1f187-1b89-47f9-b470-4fb26647bc98	Updating is unnecessary in my opinion. It is difficult for the user to perform any operation without updating, and sometimes a person may be in a hurry to make a transfer or other service.	badra khalifa	##########			13	ar	us		3	ar	update unnecessary opinion difficult user perform operation without update sometimes person may hurry make transfer service	Negative	Google Play Store	1	1	0
Google Play Store	c2d243a0-d8e8-4168-8e9d-b72f9d7ac2a4	Beautiful.	Reemeم MooM	##########			0	ar	us		5	ar	beautiful	Positive	Google Play Store	0	0	0
Google Play Store	d02c5ffe-85cc-4f3b-90a7-2ef78ecf3966	Bad application	حسن الفهيد	##########			0	ar	us		1	ar	bad application	Negative	Google Play Store	1	0	0
Google Play Store	102a1b79-fe61-433d-a8aa-1f04c8d6aa32	The situation is miserable. 🤨🤨	سعد الحربي	##########			0	ar	us		1	ar	situation miserable	Negative	Google Play Store	1	0	0
Google Play Store	273005e0-2765-4e22-85f1-dcc2de19d13b	The application is continually freezing and constantly prompts for location services even though location services are enabled.	Ra Shed	##########			4	ar	us		1	ar	application continually freeze constantly prompt location service even though location service enable	Negative	Google Play Store	0	1	1
Google Play Store	c7a616d0-1192-4f1f-8eea-035a4c97cdaf	Wonderful	Soma Alshmrani	##########			0	ar	us		5	ar	wonderful	Positive	Google Play Store	0	0	0
Google Play Store	703f3847-42a5-4406-9803-5f1ba63d96ef	Very bad.	Assem Hawary	##########			0	ar	us		1	ar	bad	Negative	Google Play Store	1	0	0
Google Play Store	9d611aeb-4abe-4964-84c1-3eec868428c5	The new update is worse. When I try to access the application, it asks me to specify my location, even though specifying the location is not working correctly. Please resolve this issue.	عبد السلام	##########			0	ar	us		1	ar	new update bad try access application ask specify location even though specify location work correctly please resolve issue	Negative	Google Play Store	1	1	0
Google Play Store	5d13fe73-a000-4d87-a902-3513fcb25737	Unfortunately, the website is poorly repaired and every few days it says there is an update but the problem still persists and it doesn't open. What is the reason?	ابو مشعل المفتي	##########			0	ar	us		2	ar	unfortunately website poorly repair every days say update problem still persist doesnt open reason	Negative	Google Play Store	1	1	0
Google Play Store	f6e828da-c6fe-4cf7-b69c-4ff2e903882c	The application is very bad, it asks for location activation even though it is already enabled. I hope the problem will be fixed because it doesn't work on Android.	عرب كيمز alhabib	##########			0	ar	us		1	ar	application bad ask location activation even though already enable hope problem fix doesnt work android	Negative	Google Play Store	1	1	0
Google Play Store	c6121f42-b65d-4776-98af-eea75afc45bd	The application didn't open for me because of the latest update.	Saud S.G.	##########			0	ar	us		5	ar	application didnt open late update	Negative	Google Play Store	0	1	0
Google Play Store	8a9689e4-5435-4cc6-91a6-a12c31c8e24f	The application is glitchy and asks for location activation even though it is already enabled. Titi Titi, it's like when I went and it unfortunately didn't open for me.	عبدالرحمن الحسين	##########			0	ar	us		1	ar	application glitchy ask location activation even though already enable titi titi like go unfortunately didnt open	Negative	Google Play Store	0	1	0
Google Play Store	19e75d98-c6fc-47df-9965-2eebd7300c32	It is very bad due to the frequent updates, difficulty in its programs, and browsing.	Mohammmd Alshami	##########			0	ar	us		1	ar	bad due frequent update difficulty program browse	Negative	Google Play Store	1	0	0
Google Play Store	59ca2805-daaa-43eb-abd3-0c639144026f	He is asking me to activate the website even though it is working fine, it's annoying me, by God.	زهير البدن	##########			0	ar	us		2	ar	ask activate website even though work fine annoy god	Negative	Google Play Store	1	0	0
Google Play Store	d842731c-60f6-4f19-96f0-ef3eb74fcd69	The app is asking me for something, so I entered the website and said "Activate." Two icons appeared, one saying "Delete the app" and the other saying "Force Stop." I don't know which one to press. I tried both, but neither worked. The app got deleted, and I don't know how to get it back. It's a complicated problem.	عدنان عامر	##########			6	ar	us		1	ar	app ask something enter website say activate two icons appear one say delete app say force stop dont know one press try neither work app get delete dont know get back complicate problem	Negative	Google Play Store	1	1	0
Google Play Store	cb04843d-c044-44de-903a-8eb08c06c1ae	Unfortunately, for over a week now, the application has been either out of service or strangely hacked. It's a global bank and its service is extremely, extremely poor.	Hussain Altijani	##########			0	ar	us		1	ar	unfortunately week application either service strangely hack global bank service extremely extremely poor	Negative	Google Play Store	1	1	0
Google Play Store	48695f5a-e7d9-48e7-9108-99aad86066bd	It's a problem, by Allah! One day the website tells you one thing, and the other day it tells you that you have to register your phone number. It's annoying us."	Modar Al Da'as	##########			1	ar	us		1	ar	problem allah one day website tell one thing day tell register phone number annoy us	Negative	Google Play Store	1	0	0
Google Play Store	bb03df2d-a649-48a2-97e5-0f284bfd7e6f	SAFffsa	أبوصقر العتيبي	##########			0	ar	us		1	ar	safffsa	Neutral	Google Play Store	0	0	0
Google Play Store	a2647124-dc19-4694-91fb-3759f470fbd0	Failed services that do not keep up with development.	A Gh	##########			0	ar	us		1	ar	fail service keep development	Negative	Google Play Store	1	1	0
Google Play Store	62d3920d-5e59-4cfc-a95f-858bc2112f73	Bad experience. It asks for location even though it is already enabled.	ابو فهد	##########			0	ar	us		1	ar	bad experience ask location even though already enable	Negative	Google Play Store	1	0	0
Google Play Store	dbdf3dc3-d788-47e4-ac81-9577e156c1b4	Very bad. He keeps asking me to renew the website, and when I specify the location, he asks for renewing the website again. I deleted the application and reinstalled it, but it is the same. I need assistance, please.	Al Noor Coffee بن النور	##########			0	ar	us		5	ar	bad keep ask renew website specify location ask renew website delete application reinstall need assistance please	Negative	Google Play Store	1	1	0
Google Play Store	2b4e77d0-08cf-4bb1-b2d8-730232c96329	the worst application that asks for location identification and has been existing from the beginning.	حسن الشيخي	##########			1	ar	us		1	ar	bad application ask location identification exist begin	Negative	Google Play Store	1	0	0
Google Play Store	98e83e17-69f5-41b5-a772-ac124949e881	Excellent guys, enter the settings on your mobile or the menu that opens with you if it requests permission to open the website, and allow the program to determine the location when using it, and it will open with you. Good luck!	عبدالله الزريق	##########			0	ar	us		5	ar	excellent guy enter settings mobile menu open request permission open website allow program determine location use open good luck	Positive	Google Play Store	1	1	0
Google Play Store	f646247b-9cd5-4c64-81be-59c223c1a583	The location problem must be resolved.I cannot access and it asks for locating the position, even though it is enabled.	Motaz Bdira	##########			1	ar	us		1	ar	location problem must resolvedi access ask locate position even though enable	Negative	Google Play Store	0	1	0
Google Play Store	1f1d17e0-3dbd-496a-b6cd-62d93309312d	The application is bad and does not open, it asks for site activation even though it is already activated.	محمد عاصم	##########			4	ar	us		1	ar	application bad open ask site activation even though already activate	Negative	Google Play Store	1	1	0
Google Play Store	da8ec694-80e9-41bf-819e-5803d1d32524	Very bad, especially the latest update.	احمد المبارك	##########			0	ar	us		1	ar	bad especially late update	Negative	Google Play Store	1	0	0
Google Play Store	6842f2fa-0136-478b-af18-de17b2851a7a	Excellent and their customer service is good.	ابراهيم الدوسري	##########			0	ar	us		5	ar	excellent customer service good	Positive	Google Play Store	0	0	0
Google Play Store	3f6ed41e-8dd2-4aa0-aa7c-bd56020d8464	Peace be upon you. Dear officials at SABB Bank, the situation is very bad. Updating every two weeks is reasonable. Please inform us, as your application is now requesting location identification. We were unable to open the application, and it stopped working. Is there anyone who can respond? It is our right to file a complaint about SABB Bank on the website of the Saudi Arabian Central Bank, as t…	ناصر ال مبشر	##########			0	ar	us		1	ar	peace upon dear officials sabb bank situation bad update every two weeks reasonable please inform us application request location identification unable open application stop work anyone respond right file complaint sabb bank website saudi arabian central bank situation tolerate delay	Negative	Google Play Store	1	0	1
Google Play Store	21601ef8-5879-467b-a678-3c927abf8f50	It used to be one of the best banks, but with all the updates, the website keeps asking for permission and when transferring, it automatically exits the application. I haven't been able to benefit for two days, and the problem continues.	وااافي الوااافي	##########			26	ar	us		1	ar	use one best bank update website keep ask permission transfer automatically exit application havent able benefit two days problem continue	Negative	Google Play Store	0	1	0
Google Play Store	37f978de-94b5-4c46-be4f-b7ad0213340c	When running the application, it asks for location identification despite the location already being enabled. When I try to identify it again, it asks me to identify it once more.	خالد سالم بن صريمان	##########			0	ar	us		5	ar	run application ask location identification despite location already enable try identify ask identify	Neutral	Google Play Store	0	1	0
Google Play Store	e8723b51-905a-4a61-bfaa-6766276c2d72	The bank that merged with the first bank is not beneficial for the customer in terms of services and speed.	علي السعيد	##########			0	ar	us		3	ar	bank merge first bank beneficial customer term service speed	Negative	Google Play Store	1	0	0
Google Play Store	a0ec7d3e-6b73-4944-8fb1-6049d7410841	The application is not working at all. Bad experience.	black night	##########			0	ar	us		1	ar	application work bad experience	Negative	Google Play Store	1	1	0
Google Play Store	7cebe928-37d6-4bac-8728-c4ee73218a99	An amazing application	yasser shehata	##########			0	ar	us		5	ar	amaze application	Positive	Google Play Store	0	0	0
Google Play Store	4532eedc-9734-44a1-8e6f-dd3aa39e9acd	The comment upon entering the application is very bad.	ديمة بندقجي	##########			0	ar	us		3	ar	comment upon enter application bad	Negative	Google Play Store	1	0	0
Google Play Store	0ad9d7ca-fdc1-4236-a97a-d2fc0cafcce1	bad	Reda	##########			0	ar	us		1	ar	bad	Negative	Google Play Store	1	0	0
Google Play Store	f2494674-8495-4aeb-8a69-c50b19b60753	Every day there is an update but it doesn't open to talk, and there is no activation of the website with the update.	Ali Jaha Co	##########			0	ar	us		1	ar	every day update doesnt open talk activation website update	Negative	Google Play Store	0	1	0
Google Play Store	86eeac86-6ecf-46e0-a931-1ef44bfe2b3f	The application has become unable to open. It is a very bad experience.	adel saed	##########			0	ar	us		1	ar	application become unable open bad experience	Negative	Google Play Store	1	1	0
Google Play Store	6b124132-466e-450b-9772-2243f460d37a	After the new update, the website requests my geolocation, which is enabled on my mobile, but it doesn't let me in. Please solve the problem.	محمد هزازي	##########			0	ar	us		1	ar	new update website request geolocation enable mobile doesnt let please solve problem	Negative	Google Play Store	0	1	0
Google Play Store	65dcdb6c-2c41-44f9-9ed8-7d5bb5c6d363	Oh Wells Fargo, they took us back to the old system. We got tired of the new application, it's the worst.	alhanan 74	##########			0	ar	us		5	ar	oh well fargo take us back old system get tire new application bad	Negative	Google Play Store	1	0	0
Google Play Store	e20d0a3d-131b-4431-b699-5a8a90336fc6	Excellent application, comfortable, easy to use, and everything is clear.	سامي النشوان	##########			0	ar	us		5	ar	excellent application comfortable easy use everything clear	Positive	Google Play Store	0	0	0
Google Play Store	53dd7f36-1b56-468f-b5a7-6a1ff38d2ceb	Nice.	ahmed gouda	##########			0	ar	us		5	ar	nice	Positive	Google Play Store	0	0	0
Google Play Store	6d3ace42-7c96-4e06-a78d-ba9c7939c098	"The update is very bad, it keeps requesting the location and freezing. Please solve the problem as soon as possible."	m فتى الغربه	##########			3	ar	us		1	ar	update bad keep request location freeze please solve problem soon possible	Negative	Google Play Store	1	1	1
Google Play Store	914d6426-f38d-46ed-b52b-76a50e6692f8	The worst program ever happened to me. I have been facing a problem with it for my whole life. I went to the bank three times and called customer service several times, but until now the program is not working and I haven't found a solution.	Fadel Hasssn	##########			0	ar	us		1	ar	bad program ever happen face problem whole life go bank three time call customer service several time program work havent find solution	Negative	Google Play Store	1	1	0
Google Play Store	68388a97-4078-424f-a86a-9b8f66d34bc1	The application is not working. I kindly request the supervisors to fix the issue. It tells me to allow activation of my location, but I have already activated it. The problem has been there since the last update.	قناة حسن وتلوي Dona	##########			4	ar	us		5	ar	application work kindly request supervisors fix issue tell allow activation location already activate problem since last update	Negative	Google Play Store	0	1	0
Google Play Store	613dc3f8-d485-49af-8977-a09792c16c1a	the worstprogram after the update, they regretted it.	Hemooo MD	##########			0	ar	us		1	ar	worstprogram update regret	Negative	Google Play Store	1	1	0
Google Play Store	1d3a1173-4412-4787-9e80-d93c8f66248d	The experience is nice.	Zenab Hussein	##########			0	ar	us		5	ar	experience nice	Positive	Google Play Store	0	0	0
Google Play Store	6807155f-feb2-4a9c-b426-77a88132092c	Bad	وفاء احمد	##########			0	ar	us		1	ar	bad	Neutral	Google Play Store	1	0	0
Google Play Store	5803ed02-8223-40b0-89eb-3a5737c485b0	Very bad... After the update, it only works after restarting the website. I will change this failed bank... The link is not a security authority to monitor people's websites.	azk ksa	##########			1	ar	us		1	ar	bad update work restart website change fail bank link security authority monitor people websites	Negative	Google Play Store	1	1	0
Google Play Store	e70bb0a6-8cc4-432f-8167-da535d6f0fb9	Brother, what is this? Every time I try to enter, I want to pay my electricity bill, but it kicks me out of the program. I mean, it's not enough that it's a bad bank and you still make mistakes. By Allah, if my account wasn't tied to my workplace, I would close it immediately.	Abdullah Shahani	##########			0	ar	us		1	ar	brother every time try enter want pay electricity bill kick program mean enough bad bank still make mistake allah account wasnt tie workplace would close immediately	Negative	Google Play Store	1	1	0
Google Play Store	4f4debb6-a63d-4271-9f2a-fb3a9b02f16f	From bad to worse, despite the frequent updates. The bills, traffic violations, and payments do not appear. The worst banking application I have ever seen.	Abdulrahman Sulaiman	##########			107	ar	us		1	ar	bad bad despite frequent update bill traffic violations payments appear bad bank application ever see	Negative	Google Play Store	1	1	0
Google Play Store	d21e0351-1857-4fd9-a046-69150eeec646	It is not perfect.	حسن القرني	##########			0	ar	us		1	ar	perfect	Negative	Google Play Store	0	0	0
Google Play Store	d2717d81-ee22-4041-925c-264ecf4e9cc0	Very beautiful application.	Walidi Abula	##########			0	ar	us		2	ar	beautiful application	Positive	Google Play Store	0	0	0
Google Play Store	6f5ed9cd-e834-45f4-8438-040e676bc57d	Excellent/Perfect/Outstanding	العبدلي محمد	##########			0	ar	us		5	ar	excellentperfectoutstanding	Positive	Google Play Store	1	0	0
Google Play Store	880f0527-a4fe-4b28-8fd7-ee0388ff60e9	The application is not working.	riile riile	##########			0	ar	us		1	ar	application work	Negative	Google Play Store	0	1	0
Google Play Store	1fe72a73-942b-4fff-ac23-a147514231ac	Sometimes it asks for location permission, and when allowed, the program doesn't open.	Abdullah Al hosseni	##########			0	ar	us		4	ar	sometimes ask location permission allow program doesnt open	Neutral	Google Play Store	0	1	0
Google Play Store	0345a25e-180c-4e8f-8c3b-a7368a00585a	Very bad, every day there is an update and the website forces me to respond...	SUBZERO	##########			0	ar	us		1	ar	bad every day update website force respond	Negative	Google Play Store	1	0	0
Google Play Store	aa6c6dee-1b22-4eb4-9f32-e5aac52f6fa9	The situation is getting worse and worse. I try to access the application and it asks me to specify the location, even though the location was already enabled. Despite specifying the location again, the problem persists. There are always malfunctions and delays. We will resort to replacement if there is no improvement and development.	MAHDI AL JUMAIA	##########			164	ar	us		1	ar	situation get bad bad try access application ask specify location even though location already enable despite specify location problem persist always malfunction delay resort replacement improvement development	Negative	Google Play Store	1	1	0
Google Play Store	fd11354b-9b98-4f07-b0b5-4a660116c17b	Bad.	Ahmed Abashar	##########			0	ar	us		1	ar	bad	Negative	Google Play Store	1	0	0
Google Play Store	3ba8d661-5108-4843-b852-7389a8f6d963	I hope developers will add fingerprint login.	أبوجواد التميمي	##########			0	ar	us		5	ar	hope developers add fingerprint login	Positive	Google Play Store	0	1	0
Google Play Store	bffea17d-5303-4d12-af21-6e3d38d499d7	The struggle when opening the application is not like other banking applications.	M M T	##########			0	ar	us		1	ar	struggle open application like bank applications	Negative	Google Play Store	1	0	0
Google Play Store	88f2ed06-e1b7-4257-ada4-930feb7d1388	There is a problem after the update, it is not working. Please provide a solution to the problem.	T&N T&N	##########			0	ar	us		1	ar	problem update work please provide solution problem	Negative	Google Play Store	0	1	0
Google Play Store	2a17c0a6-1557-4a5c-80a7-5df9992ad8a2	Thank you for publishing. May Allah reward you with goodness and bless you.	تركي محمود	##########			0	ar	us		5	ar	thank publish may allah reward goodness bless	Positive	Google Play Store	0	0	0
Google Play Store	931ac16e-6224-418c-9ce9-d4d5b37ffa20	It's not working, it needs to be updated, there is a problem.	TNT. X1	##########			0	ar	us		1	ar	work need update problem	Negative	Google Play Store	0	1	0
Google Play Store	0747a5b5-32a9-455f-8323-001179b0b866	Great application	H A	##########			0	ar	us		5	ar	great application	Positive	Google Play Store	0	0	0
Google Play Store	28f58a55-3bcd-4e38-b092-d1f837d9d90b	He isn't willing to pay the electricity bill.	mido kalifa	##########			0	ar	us		1	ar	isnt will pay electricity bill	Negative	Google Play Store	0	1	0
Google Play Store	b01c9cfb-c037-44e6-845f-2dae2230901d	Stop working continuously.	طلال السلمي	##########			2	ar	us		1	ar	stop work continuously	Negative	Google Play Store	0	1	0
Google Play Store	6fe7ff09-0ff1-4016-8c15-59fa3cbff90c	The worst application in all banks.	M. K.s	##########			0	ar	us		1	ar	bad application bank	Negative	Google Play Store	1	0	0
Google Play Store	ea488fc4-3e38-4b65-bf3c-3cea8bb20600	After I updated it, it never opens again.	Diana Rasol	##########			0	ar	us		1	ar	update never open	Negative	Google Play Store	0	1	0
Google Play Store	87d0f73b-0986-4965-8590-112b2d872d97	The update was made today... The application no longer opens on Samsung devices... Bad experience.	د. خالد	##########			20	ar	us		1	ar	update make today application long open samsung devices bad experience	Negative	Google Play Store	1	0	0
Google Play Store	9d85cea4-d10c-44d4-8e53-fbdf0cc0913a	If there was a rating less than one star, I would give it to you. It is the worst bank ever. Even the customer service is sadly lacking, with each person giving you information different from the other.	Abu Mohamed	##########			0	ar	us		1	ar	rat less one star would give bad bank ever even customer service sadly lack person give information different	Negative	Google Play Store	1	0	0
Google Play Store	9188112a-81f0-4815-b4d2-72db15e84fea	The best financial application I have tried.	مجموعة تجارتي	##########			0	ar	us		5	ar	best financial application try	Positive	Google Play Store	0	0	0
Google Play Store	259c8876-220d-4eab-bc62-f07a169e3bf5	Excellent so far and thank you.	Mazen M	##########			3	ar	us		4	ar	excellent far thank	Positive	Google Play Store	0	0	0
Google Play Store	c021e026-b38d-43b2-998d-8c15a1277676	Splendor	Fahhad Al Qahtani	##########			0	ar	us		5	ar	splendor	Positive	Google Play Store	0	0	0
Google Play Store	c2b95f7b-b6e3-4ae5-9381-1cdc94802fe2	Other banks need to improve their applications, like Al Rajhi, Ahli, and Al Bilad.	sami madanial	##########			0	ar	us		3	ar	bank need improve applications like al rajhi ahli al bilad	Neutral	Google Play Store	1	0	0
Google Play Store	cb4220a5-47db-40ea-88ec-aa8cc37d777e	I have difficulty logging in.	Mahmoud Lapoun	##########			1	ar	us		3	ar	difficulty log	Negative	Google Play Store	0	0	0
Google Play Store	3a486e26-2486-482f-9f54-d52a306d46f3	Easy to use	Sadia Washim	##########			0	ar	us		5	ar	easy use	Positive	Google Play Store	0	0	0
Google Play Store	ff56719e-c759-4823-a1d0-fab6e1b88355	Every now and then, learn from the other applications ... I am waiting for the confirmation message, time is running out and I have not received it yet.	المنشد حسن الشلاحي	##########			16	ar	us		1	ar	every learn applications wait confirmation message time run receive yet	Negative	Google Play Store	0	0	0
Google Play Store	9a69036a-5968-4da5-b983-89e0d6d3cea0	Excellent services	مصعب القصاب	##########			0	ar	us		5	ar	excellent service	Positive	Google Play Store	0	0	0
Google Play Store	25c5c6da-3840-47c6-a174-f74d2a7ac8d4	Mohsen, welcome to Google.	محسن علي (592588797)	##########			0	ar	us		5	ar	mohsen welcome google	Positive	Google Play Store	0	1	0
Google Play Store	36620f73-0947-4581-95c5-9add22e6cd42	Very bad	ل بل	##########			0	ar	us		1	ar	bad	Negative	Google Play Store	1	0	0
Google Play Store	33434a7b-2b1c-4513-b0d2-680750c386f8	Bad, bad, and he complains a lot.	فيصل فيصل	##########			0	ar	us		1	ar	bad bad complain lot	Negative	Google Play Store	1	0	0
Google Play Store	25d3f9ef-3518-4e5a-a944-8abdf9850363	the worst application	Abu3ram	##########			0	ar	us		1	ar	bad application	Negative	Google Play Store	1	0	0
Google Play Store	133021e0-0d05-4601-a291-66a66a666a93	Excellent and easy to use. Well done!	محمد عبدالرحمن	##########			0	ar	us		5	ar	excellent easy use well do	Positive	Google Play Store	0	0	0
Google Play Store	22e3a05b-99c1-4b9b-b1f6-cd6696901d1b	Bad bank and worse application.	wael solaty	##########			0	ar	us		1	ar	bad bank bad application	Negative	Google Play Store	1	0	0
Google Play Store	f5b6e5a7-1090-4f07-b462-99e223f0e0f1	The latest update is very bad.	ahmed Sharif	##########			0	ar	us		1	ar	late update bad	Negative	Google Play Store	1	0	0
Google Play Store	a8dc2987-a629-4178-b36e-488043a135fb	Excellent	سعود العنقري	##########			0	ar	us		5	ar	excellent	Positive	Google Play Store	0	0	0
Google Play Store	f98410e6-8c60-4670-99b3-208d65b9320d	The application is terrible compared to other banks. It constantly crashes and requires frequent mandatory updates, and there is no improvement.	Man AA	##########			1	ar	us		1	ar	application terrible compare bank constantly crash require frequent mandatory update improvement	Negative	Google Play Store	1	1	1
Google Play Store	c71ae0bf-37fd-4d8f-82f9-e07506c6821a	The latest update is very very bad, it's not even worth using the application. I had to lock my bank account because of the frequent updates.	Bader Ahmed	##########			5	ar	us		1	ar	late update bad even worth use application lock bank account frequent update	Negative	Google Play Store	1	1	0
Google Play Store	55516bf1-52a7-4ddc-afcc-8f46e7ab188f	Good.	WASEL ALMUTAWA	##########			0	ar	us		5	ar	good	Positive	Google Play Store	0	0	0
Google Play Store	811186c3-b2c1-4dd3-a5fc-a6608fa72f58	"In the hustle and bustle of your lives, seek forgiveness from Allah abundantly. .🌿!"	RAFEQ ALESHAWI	##########			0	ar	us		3	ar	hustle bustle live seek forgiveness allah abundantly	Positive	Google Play Store	0	0	0
Google Play Store	cd690cd8-5e6e-4d58-aa4b-229886b8e8b6	Very very excellent	محمد مسعود	##########			0	ar	us		5	ar	excellent	Positive	Google Play Store	0	0	0
Google Play Store	24f1695a-9f20-4080-a65e-6df4d447fa4f	Not good.	نواف المالكي	##########			0	ar	us		1	ar	good	Negative	Google Play Store	0	0	0
Google Play Store	81061f2f-3ca9-43d2-b3ea-a6fe640e6f04	The new update is bad.	راشد العتيبي	##########			1	ar	us		1	ar	new update bad	Negative	Google Play Store	1	0	0
Google Play Store	d8c1ac1d-39d3-4400-bdc6-9e4008489bf3	And then with this application, every week I will inform you to block the card and you will have to enter the information again.	امين العيسى	##########			0	ar	us		2	ar	application every week inform block card enter information	Neutral	Google Play Store	0	1	0
Google Play Store	4a3190cc-7f15-4ac9-a137-12fb3f94f219	Beautifully.	عبادي العالمي	##########			0	ar	us		5	ar	beautifully	Positive	Google Play Store	0	0	0
Google Play Store	8cb09017-3d69-41cd-8c5a-8a085fc99953	Excellent very very very 👍👍👍👍👍👍👍👍👍👍👍👍👍👍👍👍👍👍👍👍👍	#بندور_ادمنت_حبك _العريشي	##########			0	ar	us		5	ar	excellent	Positive	Google Play Store	0	0	0
Google Play Store	1f72d98f-9592-4187-a498-51aadcca5e66	Unfortunately, the application is very bad and its services have become poor. It is no longer useful and it just occupies space for nothing. 😤😤	ابو احمد العسيري	##########			4	ar	us		1	ar	unfortunately application bad service become poor long useful occupy space nothing	Negative	Google Play Store	1	0	0
Google Play Store	972b6574-049f-4769-bd68-a4c0915a016c	Very bad	Home	##########			0	ar	us		1	ar	bad	Negative	Google Play Store	1	0	0
Google Play Store	ee2cd181-73f6-45ac-837c-37a67a14aab7	Thank you 🌹 and we hope for more from you.	MOHAMED	##########			0	ar	us		5	ar	thank hope	Positive	Google Play Store	0	0	0
Google Play Store	cd4eb879-767b-4045-a411-2fd1fccbc57d	Excellent application.	saud gh	##########			0	ar	us		4	ar	excellent application	Positive	Google Play Store	0	0	0
Google Play Store	045a5133-0712-4c9d-a474-dbfaffedf647	Excellent, one of the best banks if not the best.	Mohamed Kandil	##########			0	ar	us		5	ar	excellent one best bank best	Positive	Google Play Store	0	0	0
Google Play Store	f23ab202-0f75-4e6c-b818-2533ad1fa130	I receive an error message every time I try to pay any bill.	ali bahamish	##########			0	ar	us		3	ar	receive error message every time try pay bill	Negative	Google Play Store	0	1	0
Google Play Store	9bc98bff-b32e-40ca-8efa-094b27219393	Excellent and fast.	ابوسعد	##########			0	ar	us		5	ar	excellent fast	Positive	Google Play Store	0	0	0
Google Play Store	2c1fe226-e8cd-4712-b8c4-46f19793829a	I swear to God, the application is the worst.	fouad namnakani	##########			0	ar	us		1	ar	swear god application bad	Negative	Google Play Store	1	0	0
Google Play Store	224dd7d7-c697-46d4-897a-4d9bb8046630	The best bank in the world, but I need a job if you please.	badwailan badwailan	##########			0	ar	us		5	ar	best bank world need job please	Positive	Google Play Store	0	0	0
Google Play Store	c0942a55-404b-411d-8411-109c84cc3750	Very beautiful	ياسرأحمد هوساوي	##########			0	ar	us		5	ar	beautiful	Positive	Google Play Store	0	0	0
Google Play Store	8e16df4e-0200-46e6-a287-ba4e080761e4	My account was suspended without prior notice. I contacted customer service and they told me the reason is unclear. This bank is very incompetent; there is no reason to suspend the card.	عبد العزيز القحطاني	##########			0	ar	us		1	ar	account suspend without prior notice contact customer service tell reason unclear bank incompetent reason suspend card	Negative	Google Play Store	0	1	1
Google Play Store	b9e9e5dc-d418-41e1-afcf-d08510ffe383	It is done.	نصر عوض	##########			0	ar	us		5	ar	do	Neutral	Google Play Store	0	1	0
Google Play Store	c1df00b6-ed95-4d9d-8c9a-4e641ffd3719	Excellent and easy-to-use application.	ابو عبدالرحيم السعدون	##########			0	ar	us		4	ar	excellent easytouse application	Positive	Google Play Store	0	0	0
Google Play Store	d628ad1d-c247-4229-bf1a-f7bbe82f8852	Excellent.. I recommend everyone to subscribe.	Mohmad Hasn	##########			0	ar	us		5	ar	excellent recommend everyone subscribe	Positive	Google Play Store	1	0	0
Google Play Store	260e5b50-c6d2-423a-9fc2-5ea37b1485ed	The problem is that whenever I try to login to my account, it immediately logs me out.	محمد المساوى	##########			2	ar	us		1	ar	problem whenever try login account immediately log	Negative	Google Play Store	0	1	0
Google Play Store	3f082a75-ee87-4bd3-825f-eb46f515d3f3	"Great" or "wonderful"	abuabdullah alahlawi	##########			0	ar	us		5	ar	great wonderful	Positive	Google Play Store	0	0	0
Google Play Store	bb8443cd-90a9-45a5-bd4b-36ef9540464e	Very easy application.	al_sedqi	##########			0	ar	us		5	ar	easy application	Positive	Google Play Store	0	0	0
Google Play Store	28651b9f-6529-446d-9df4-ce2a609608d5	Very bad experience... nothing works there. You enter the password for the card and it tells you it's wrong and that you've exceeded the number of attempts. Please contact customer service... everything at their end is just about customer service... contact customer service... what trouble did I get myself into with this bank?	Noah MM	##########			0	ar	us		1	ar	bad experience nothing work enter password card tell wrong youve exceed number attempt please contact customer service everything end customer service contact customer service trouble get bank	Negative	Google Play Store	1	1	0
Google Play Store	21086697-7c96-4380-9144-539d48169938	There is a delay in the program's work and it is not opening, which has caused a delay in the work and services (very annoying).	Dr H	##########			5	ar	us		1	ar	delay program work open cause delay work service annoy	Negative	Google Play Store	1	1	1
Google Play Store	69c19088-143d-42e0-a385-7985c0950a6e	Respected bank and very good service.	فارس فارس الشيخ	##########			0	ar	us		5	ar	respect bank good service	Positive	Google Play Store	0	0	0
Google Play Store	34f39731-aab2-4a3b-b7e3-141bba8687a3	The best update so far 👍👍👍	Ali Al Wadai	##########			1	ar	us		5	ar	best update far	Positive	Google Play Store	0	0	0
Google Play Store	7d80179d-38b6-4cb5-880d-a6eb62261a51	"Very excellent, the SAP application wins in its services."	Market Stoke	##########			0	ar	us		5	ar	excellent sap application win service	Positive	Google Play Store	0	0	0
Google Play Store	a418441c-8d68-4bbb-924e-7c1de022089e	The new update is bad and installation is incomplete, and the application is completely disabled.	Waseem Bokho	2022-09-07 07:59:00			7	ar	us		1	ar	new update bad installation incomplete application completely disable	Negative	Google Play Store	1	1	0
Google Play Store	a372f195-4f5c-4b23-863e-2646643346c3	Excellent job, may you be blessed with health.	AHMED ALSHIBANI	##########			0	ar	us		5	ar	excellent job may bless health	Positive	Google Play Store	1	0	0
Google Play Store	6c06ce71-2468-4c60-8883-851063984233	Failed	Bader A	##########			0	ar	us		1	ar	fail	Negative	Google Play Store	0	1	0
Google Play Store	87607920-6cfb-4d11-aa21-54dd15e9300c	Unfortunately, every other day there is an update, and with every update, I am forced to be a client and the application does not open with you. Some updates do not update and the application does not open, which disrupts my interests.	النمر البرمائي	2022-09-04 05:11:00			28	ar	us		1	ar	unfortunately every day update every update force client application open update update application open disrupt interest	Negative	Google Play Store	1	1	0
Google Play Store	8846d785-606c-4d15-83c7-40dd128bcb6c	Excellent, no problems.	علي عواجي	2022-09-04 04:41:00			0	ar	us		5	ar	excellent problems	Positive	Google Play Store	0	0	0
Google Play Store	8f58757d-d854-4af6-91aa-64f8c0c2a19b	The application problem keeps closing every moment.	النور حواء	##########			0	ar	us		1	ar	application problem keep close every moment	Negative	Google Play Store	1	1	0
Google Play Store	d469914a-75da-4c68-87bf-270a526665b0	May Allah have mercy on the years of the first professional transfer bank to Visa, if it is delayed by a minute during peak hours. I, as a British citizen, wait for ages and I have to open the application to confirm. I transferred the amount from 11:02 PM to 1:10 AM, and I received the notification. The bank is extremely lax and irresponsible. Staying with this bank is a matter that needs conside…	Ali	##########			2	ar	us		1	ar	may allah mercy years first professional transfer bank visa delay minute peak hours british citizen wait age open application confirm transfer amount pm receive notification bank extremely lax irresponsible stay bank matter need consideration deserve interest criticisms direct take action cheat around riyals visa refund keep stall may allah forgive allow	Negative	Google Play Store	1	1	1
Google Play Store	f36518a8-10d1-44f6-8d8d-46f8a37d70d9	The app is very bad and most of the comments describe how bad it is. I swear I hope the app is supported by the developers. I have dealt with more than one banking app and honestly, Al Rajhi app is very special and it is updated and errors are fixed promptly. I hope that SABB Bank fixes the application's problems.	3badi Andi	##########			1	ar	us		1	ar	app bad comment describe bad swear hope app support developers deal one bank app honestly al rajhi app special update errors fix promptly hope sabb bank fix applications problems	Negative	Google Play Store	1	1	0
Google Play Store	78da47cf-58a4-4a11-9442-5e9e8f40a4a0	The application is slow.	mohand omara	##########			0	ar	us		3	ar	application slow	Negative	Google Play Store	0	0	1
Google Play Store	0033ea9e-bfed-495c-b4e1-6cf7e8ab3bb8	Very concise and useful sentences.	الحمد لله	##########			0	ar	us		5	ar	concise useful sentence	Positive	Google Play Store	0	0	0
Google Play Store	3e7445c3-af68-44ba-81b2-5fbc6926e882	Very good personal experience.	Mobarak Gdawy	##########			0	ar	us		5	ar	good personal experience	Positive	Google Play Store	0	0	0
Google Play Store	a634ea9e-c08b-4801-a7d8-a14fb0eb8d14	Stupid application X stupid X stupid X stupid X stupid. The numbers come out scrambled when entered and when executed it says the entered numbers are wrong!! Obviously wrong because your application is stupid.	Majed M.	2022-09-02 09:45:00			0	ar	us		1	ar	stupid application x stupid x stupid x stupid x stupid number come scramble enter execute say enter number wrong obviously wrong application stupid	Negative	Google Play Store	1	1	0
Google Play Store	e302d4e7-1b17-4424-9e48-d80d1e5ad64e	The application is not functioning properly, it's the same as the old application and constantly asks for updates, this is really frustrating. I wish it could provide other services like recharging credit... etc.	m.s 2015.d	##########			0	ar	us		1	ar	application function properly old application constantly ask update really frustrate wish could provide service like recharge credit etc	Negative	Google Play Store	1	1	0
Google Play Store	aa5f026c-f3f9-4021-a922-028f122890fa	Excellent and smooth with ease	عبدالمجيد الهوسه	##########			0	ar	us		5	ar	excellent smooth ease	Positive	Google Play Store	0	0	0
Google Play Store	3100fba7-7c2d-49aa-bf53-b2dec3410dc0	Significant improvement from before.	Fz zH	##########			0	ar	us		5	ar	significant improvement	Positive	Google Play Store	0	0	0
Google Play Store	5b9f772d-0f19-4ee2-ac55-a3cbf55c38bb	Very nice	Faleh Alasmari	##########			0	ar	us		5	ar	nice	Positive	Google Play Store	0	0	0
Google Play Store	dc776b3c-381b-4628-9ec4-7a0ba37a50df	After finishing the application, it cannot be closed from the mobile interface except by closing all active pages. Figure it out. 👍👍	صَــبــا نــجــد نـــجــد الـعـذيـه .	##########			5	ar	us		2	ar	finish application close mobile interface except close active page figure	Neutral	Google Play Store	0	1	0
Google Play Store	57d65c77-ac4a-42fe-8ff8-5ee0ac583eed	He keeps saying your secret number is wrong every time the salaries are disbursed, causing Ahli Bank to suspend salaries and the like. That's just great!	ابراهيم المري	##########			0	ar	us		1	ar	keep say secret number wrong every time salaries disburse cause ahli bank suspend salaries like thats great	Negative	Google Play Store	1	0	1
Google Play Store	e20a712e-d2d7-45cf-9d3a-c9434523d8ea	Excellent	خليل عسيري	##########			0	ar	us		5	ar	excellent	Positive	Google Play Store	0	0	0
Google Play Store	cbc6bcdc-a098-4608-9447-eee88fc4c106	Wonderful	عبد العزيز ابراهيم	##########			0	ar	us		5	ar	wonderful	Positive	Google Play Store	0	0	0
Google Play Store	75609b35-9358-44ef-91c3-fba0ba67bdd9	The application is excellent.	M U S T A F A	##########			0	ar	us		5	ar	application excellent	Positive	Google Play Store	0	0	0
Google Play Store	cbe8d876-4776-42e5-ac9c-1428d980c9a0	Unfortunately, the bank is bad and there is no credibility. My bank account was stolen without my knowledge, and I did not receive any messages about the withdrawal amount. The withdrawal took place over several stages and months. When I visited the bank and filed a complaint, they treated us normally. May God be my advocate against you.	Abdallah odeh	##########			0	ar	us		1	ar	unfortunately bank bad credibility bank account steal without knowledge receive message withdrawal amount withdrawal take place several stag months visit bank file complaint treat us normally may god advocate	Negative	Google Play Store	1	0	0
Google Play Store	1899f9e6-9b34-4e4e-b620-0e401f2fa103	Very good.	معاذ الصيني	##########			0	ar	us		4	ar	good	Positive	Google Play Store	0	0	0
Google Play Store	1f55d34e-552a-4f55-8cc8-781e82ae91a4	Excellent and fast.	احسان فطاني	##########			0	ar	us		5	ar	excellent fast	Positive	Google Play Store	0	0	0
Google Play Store	1d087696-40b7-4e01-89c5-78cfdbe68966	Unfortunately, it doesn't work on mobile. Unfortunately, the only bank that doesn't allow opening the application through mobile like Al-Ahli and Fransie without going to the Google page. You are a prestigious bank, but the application is dumb 😂.	نجيب حسين	##########			0	ar	us		1	ar	unfortunately doesnt work mobile unfortunately bank doesnt allow open application mobile like alahli fransie without go google page prestigious bank application dumb	Negative	Google Play Store	1	1	0
Google Play Store	99c6a209-fd27-469e-b3c2-0b521998fa1a	Excellent	فهد الثعلبي	##########			0	ar	us		5	ar	excellent	Positive	Google Play Store	0	0	0
Google Play Store	364bb253-cca9-466e-ad03-033e7a119cda	Excellent 👍	مسافر دايم	##########			0	ar	us		5	ar	excellent	Positive	Google Play Store	0	0	0
Google Play Store	342b7323-f537-4ca8-b8ba-67fcc882a820	Very excellent, I highly recommend using it.	Salah Hassan	##########			0	ar	us		5	ar	excellent highly recommend use	Positive	Google Play Store	0	0	0
Google Play Store	3e604d1e-be21-447d-988e-a8f54c7c3e88	Their application is very good.	Hamad Al-hammda	##########			0	ar	us		5	ar	application good	Positive	Google Play Store	0	0	0
Google Play Store	642075b0-e803-4aba-b459-a2c2673cd80c	Excellent	Ameer Abdullah	##########			0	ar	us		5	ar	excellent	Positive	Google Play Store	0	0	0
Google Play Store	53385e3e-9610-4f08-9b9a-d81b21a6eac8	Excellent and fast	FA2000AZ 21	##########			0	ar	us		5	ar	excellent fast	Positive	Google Play Store	0	0	0
Google Play Store	2e200ab2-76a1-41b1-954d-904717c8743c	A very, very excellent application.	مزوون السالم	##########			0	ar	us		5	ar	excellent application	Positive	Google Play Store	0	0	0
Google Play Store	045b46ad-e0f6-4b77-89f4-ccc243934d5d	Bad and slow.	Mohamed Ismail	##########			0	ar	us		1	ar	bad slow	Negative	Google Play Store	1	0	1
Google Play Store	c31812ec-dd52-4ac4-8866-9b4bca3e3afa	Excellent, much better than before.	كمال صقر	##########			0	ar	us		5	ar	excellent much good	Positive	Google Play Store	0	0	0
Google Play Store	e3ad521b-b3c2-448d-92bb-b041bc5dc6b6	Very good compared to others.	Loay Hejazi	##########			0	ar	us		4	ar	good compare others	Positive	Google Play Store	1	0	0
Google Play Store	b5b254e5-2e72-47d5-8211-3ae0ec27ef03	They confiscated my money without any reason, and I provided all the evidence, but they are delaying with the system.	R GG	##########			0	ar	us		1	ar	confiscate money without reason provide evidence delay system	Negative	Google Play Store	0	0	1
Google Play Store	60db5d7c-5740-4f98-9b79-559aa7b4dca6	In continuous development	Abo yousef 76	##########			0	ar	us		4	ar	continuous development	Positive	Google Play Store	0	0	0
Google Play Store	b3000f43-7231-4933-948c-8443b01c50bc	Wonderful	محمد جميل السباعي	##########			0	ar	us		4	ar	wonderful	Positive	Google Play Store	0	0	0
Google Play Store	e07a0205-4ab2-4feb-9bae-1611e55194ae	Fast, clear, and advanced application.	sulaiman OS	##########			0	ar	us		5	ar	fast clear advance application	Positive	Google Play Store	0	0	0
Google Play Store	15c3ce42-a448-4a0b-b5ff-8ed404152bbd	The application is good.	Jaffar Al Ammar	##########			1	ar	us		4	ar	application good	Positive	Google Play Store	0	0	0
Google Play Store	b467f405-3510-42ab-833f-f5d3a4d75087	Very excellent.	Yasin Mohammed	##########			0	ar	us		5	ar	excellent	Positive	Google Play Store	0	0	0
Google Play Store	6489d453-9ec9-4d47-b553-247c9939422a	Good. Sometimes the program doesn't work.	?A?	##########			0	ar	us		3	ar	good sometimes program doesnt work	Negative	Google Play Store	1	1	0
Google Play Store	53c275fb-5da5-4030-801d-c28776e54d6f	Kneeling down and very bad	احمد الذروي	##########			0	ar	us		1	ar	kneel bad	Negative	Google Play Store	1	0	0
Google Play Store	e7b384ee-b0cf-419e-954c-7804cc1c583f	A very wonderful and smooth application.	عبدالفتاح العامري	##########			0	ar	us		5	ar	wonderful smooth application	Positive	Google Play Store	0	0	0
Google Play Store	b5cdce55-7815-45f8-81e6-291642bc2654	Bad..	نوره الخيال	##########			0	ar	us		1	ar	bad	Negative	Google Play Store	1	0	0
Google Play Store	0740a434-3ece-4ce8-8a2d-901bfd04fa6e	Bad	‪abolojeen “Gh” Mr‬‏	##########			0	ar	us		1	ar	bad	Neutral	Google Play Store	1	0	0
Google Play Store	a535a633-b59b-4e33-ae8f-f82369d17b59	Excellent, veryyyyyy good.	منصور السريع	##########			0	ar	us		5	ar	excellent veryyyyyy good	Positive	Google Play Store	0	0	0
Google Play Store	1016b20d-b5a7-4f38-a2c2-c7a9793aae95	Very good.	Mostafa antar	##########			0	ar	us		5	ar	good	Positive	Google Play Store	0	0	0
Google Play Store	d1c4f4f3-0f44-4749-9191-2cbd76a9181e	May God hold you accountable, you've put me in a difficult situation. I am outside the kingdom and the application is not working, you failures. You and the bank are the worst two banks, causing trouble for customers outside the kingdom. May God not grant you success.	SARI	##########			0	ar	us		1	ar	may god hold accountable youve put difficult situation outside kingdom application work failures bank bad two bank cause trouble customers outside kingdom may god grant success	Negative	Google Play Store	1	1	0
Google Play Store	ae051524-1340-4b5d-9f5e-db528d9b4c53	Unfortunately, the application does not live up to the level of a prestigious bank like SAAB Bank, and neither does the customer service. There is no response, and the waiting time is long. Unfortunately, I will cancel my account and look for an alternative bank.	Defender cv	##########			0	ar	us		1	ar	unfortunately application live level prestigious bank like saab bank neither customer service response wait time long unfortunately cancel account look alternative bank	Negative	Google Play Store	1	0	0
Google Play Store	8446bc2c-22b1-4d21-b947-96e8f28d094f	Excellent	Zakria Adubais	##########			0	ar	us		5	ar	excellent	Positive	Google Play Store	0	0	0
Google Play Store	deaba585-cf2e-4cb0-a747-722dda070da7	Good update, but there is something better. The preference is that the username and password be on the same page. We wish you success, God willing.	ابو تركي الحارثي	##########			0	ar	us		5	ar	good update something good preference username password page wish success god will	Positive	Google Play Store	1	0	0
Google Play Store	85d6b3c8-4f99-4d07-abc0-ab5d14183999	Thank you very much, excellent.	zaki meer	##########			0	ar	us		5	ar	thank much excellent	Positive	Google Play Store	0	0	0
Google Play Store	ceb408b4-2f99-47ca-a216-d3045c15148e	Excellent	محمد المياد	##########			0	ar	us		5	ar	excellent	Positive	Google Play Store	0	0	0
Google Play Store	f791f7bd-f1bd-4446-83af-e568c25d9de1	Wonderful and easy to use.	Saleh Alghozi	##########			0	ar	us		5	ar	wonderful easy use	Positive	Google Play Store	0	0	0
Google Play Store	4e08fb45-03c8-45b6-8f5e-19fbcc84a500	Easy and convenient application, thank you.	ibra Salam	##########			0	ar	us		5	ar	easy convenient application thank	Positive	Google Play Store	0	0	0
Google Play Store	e83362d8-e60a-4199-bc76-274253639dff	I have never encountered any problems with the application, it is fast and lightweight, and of course my main account is with Sab Bank.	Zaid Alsaiari	2022-08-06 04:15:00			0	ar	us		5	ar	never encounter problems application fast lightweight course main account sab bank	Positive	Google Play Store	1	1	0
Google Play Store	c2c65f06-c190-4933-a8fd-bee24cdcdf8e	The application is excellent. Thank you for developing it. However, when using the same mobile, it asks for entering the password. Please make a modification to it.	حسين الحجي	##########			0	ar	us		5	ar	application excellent thank develop however use mobile ask enter password please make modification	Positive	Google Play Store	1	1	0
Google Play Store	95431bdf-4fe7-47c0-bd65-76db7bc38434	Excellent very much	Hussain Has him	##########			0	ar	us		4	ar	excellent much	Positive	Google Play Store	0	0	0
Google Play Store	896fac49-f936-4477-80d9-663958a33022	Asu is a banking application.	كاسبر	##########			1	ar	us		1	ar	asu bank application	Neutral	Google Play Store	0	1	0
Google Play Store	5cdaed46-eb2a-469c-bd30-7868d404b3f6	15 years and the best treatment, thank you	abdulhakim Abdullah	##########			0	ar	us		5	ar	years best treatment thank	Positive	Google Play Store	0	0	0
Google Play Store	33815ae1-731c-4f82-bda1-bbbab1181819	Very convenient application	محمود مكي	##########			0	ar	us		5	ar	convenient application	Positive	Google Play Store	0	0	0
Google Play Store	f5996c6b-3456-436e-be62-6c5873b8af48	Very good, but the updates are boring and disrupt the person.	Zozoo Thebutyfull	##########			0	ar	us		5	ar	good update bore disrupt person	Negative	Google Play Store	1	0	0
Google Play Store	19ddcbc4-53f8-4ce7-bf24-30e2dbbd012a	Excellent	علي القحطاني	##########			0	ar	us		5	ar	excellent	Positive	Google Play Store	0	0	0
Google Play Store	123e02bb-adec-4c96-be9f-5fc198aee13f	The application is very bad, especially when it comes to updating data. My account has been frozen because of updating the data.	Braa -Elshg-Mgnon	##########			3	ar	us		1	ar	application bad especially come update data account freeze update data	Negative	Google Play Store	1	0	1
Google Play Store	7748c0d5-5518-404d-b68a-7e227c179a37	Rotten.	سلوئ ابكر	##########			0	ar	us		1	ar	rotten	Negative	Google Play Store	1	0	0
Google Play Store	634ec957-43dd-4851-adfc-749fb38d9c27	All banks have applications, but I see this one as the best.	Hasan Al Asadi	##########			0	ar	us		5	ar	bank applications see one best	Positive	Google Play Store	0	0	0
Google Play Store	ee7a9af2-b8a2-4f58-98b9-38b88de5802b	Masha Allah, blessed be Allah, the best application I have ever dealt with so far is the wonderful Sabb Bank application.	احمد العكبري	##########			0	ar	us		5	ar	masha allah bless allah best application ever deal far wonderful sabb bank application	Positive	Google Play Store	0	0	0
Google Play Store	bd81ae7b-ec08-4fc9-9d1a-6a4eb330c3c0	Excellent service, especially for handling cases and paying bills... very efficient.	fahd alharbi	##########			0	ar	us		5	ar	excellent service especially handle case pay bill efficient	Positive	Google Play Store	0	0	0
Google Play Store	19e0a304-188b-48ca-a4e2-9fbd865121c1	Excellent	Ali Al-Joradan	##########			0	ar	us		1	ar	excellent	Positive	Google Play Store	0	0	0
Google Play Store	9aa09519-5721-4851-86f9-d00b46e8c916	The new update has removed the online purchase cancellation option. Please fix the issue.	Jack Jack2	##########			0	ar	us		1	ar	new update remove online purchase cancellation option please fix issue	Negative	Google Play Store	0	1	0
Google Play Store	31b62d05-fee5-427d-b3b6-981ec6a5567d	Excellent!	العميد زيد خالد	##########			0	ar	us		5	ar	excellent	Positive	Google Play Store	0	0	0
Google Play Store	4b23a023-ecb6-4e8f-8502-4016ec2bb6c1	Good.	HA GS	##########			0	ar	us		4	ar	good	Positive	Google Play Store	0	0	0
Google Play Store	761bc074-e181-4dda-a82b-806772d07472	The application is very bad, the letters and numbers in the application are very small and cause inconvenience and discomfort in use compared to other banking applications which are comfortable, easy, and clear. I hope that this will be corrected as the mobile screen is small and cannot bear things at this size. Thank you.	saeed Alsaeed	##########			39	ar	us		1	ar	application bad letter number application small cause inconvenience discomfort use compare bank applications comfortable easy clear hope correct mobile screen small bear things size thank	Negative	Google Play Store	1	1	0
Google Play Store	92705a5c-e084-4139-8ff4-652e12028f4e	Excellent	m7mD TEVES	##########			0	ar	us		5	ar	excellent	Positive	Google Play Store	0	0	0
Google Play Store	3ae4f36a-aa67-4bc4-8286-df8badc75519	Thank you, SABB Bank.	خالد حيدري	##########			0	ar	us		5	ar	thank sabb bank	Positive	Google Play Store	0	0	0
Google Play Store	54e71519-f9c5-403a-9737-24586d24d666	Not necessarily	A H	##########			0	ar	us		1	ar	necessarily	Neutral	Google Play Store	0	0	0
Google Play Store	3731823c-00a3-4074-bdf0-761a2d523a78	Excellent.	أبورعدمحمد حاجب	##########			0	ar	us		5	ar	excellent	Positive	Google Play Store	0	0	0
Google Play Store	b9b60a66-8b64-4a1d-9c4d-905740e22622	"An application that is more than wonderful, smooth, and beautiful."	Saleh Al Ghamdi	##########			0	ar	us		5	ar	application wonderful smooth beautiful	Positive	Google Play Store	0	0	0
Google Play Store	3673c7ae-4117-498a-8702-7782df956651	"the worst application crashes"	ناصر الناصر	##########			0	ar	us		1	ar	bad application crash	Negative	Google Play Store	1	1	0
Google Play Store	7e3cdc5c-fafa-440c-9cfa-0fdbd2c2e56e	Very excellent	خآلدمـآجد ”آبومـزعل“ آلقحطـآني	##########			0	ar	us		5	ar	excellent	Positive	Google Play Store	0	0	0
Google Play Store	b5ed54af-b22c-43fb-a7e6-23f02af1656a	I have a problem where if I try to enter, it asks me for a fingerprint and the fingerprint doesn't work. What's the solution? I can't access the application, I put my finger but there is no response or anything.	حمزة صالح	##########			0	ar	us		1	ar	problem try enter ask fingerprint fingerprint doesnt work whats solution cant access application put finger response anything	Negative	Google Play Store	0	1	0
Google Play Store	c1245d6b-0849-46a0-b05c-24fac8971a57	The experience was really amazing, Mashallah.	اسراء احمد	##########			0	ar	us		5	ar	experience really amaze mashallah	Positive	Google Play Store	0	0	0
Google Play Store	006a9419-58cf-49e2-9c8e-8d429e859d2d	The application is very bad and does not work most of the time.	عبدالاله باسل	##########			0	ar	us		1	ar	application bad work time	Negative	Google Play Store	1	1	0
Google Play Store	e78676cb-cfd5-4fbd-890f-ada951e5f6cc	Unfortunately, I am currently outside Cairo for a visit. Previously, whenever I logged into SAP Mobile, it would provide me with a password. However, now every time I enter my information, it says there is an error in the login system. What is the solution? I need to pay bills through the program and access stock information, transfers, and phone data.	hanan kurdi	##########			0	ar	us		4	ar	unfortunately currently outside cairo visit previously whenever log sap mobile would provide password however every time enter information say error login system solution need pay bill program access stock information transfer phone data	Negative	Google Play Store	0	1	0
Google Play Store	cfff13c9-258b-4e58-94a2-62c520ae8536	The best banking application.	Mohammad Johar	##########			0	ar	us		5	ar	best bank application	Positive	Google Play Store	0	0	0
Google Play Store	aab477c4-eccb-4cbf-83fa-37bb972c99ed	Very excellent and easy to deal with. Thank you, SABB.	يحيى شمس	##########			0	ar	us		5	ar	excellent easy deal thank sabb	Positive	Google Play Store	0	0	0
Google Play Store	c87bb517-3a93-4aaf-a48e-7190ac06dbe8	Amazing application	وهيب سليم	##########			0	ar	us		5	ar	amaze application	Positive	Google Play Store	0	0	0
Google Play Store	9b2b89b1-1635-4a70-91e5-c4b783462a20	bad	ابونايف الحربي	##########			0	ar	us		2	ar	bad	Negative	Google Play Store	1	0	0
Google Play Store	bbcd3338-42de-4189-add6-44d7432acf3f	Thank you	Abbas Nasser	##########			0	ar	us		5	ar	thank	Positive	Google Play Store	0	0	0
Google Play Store	5f9a5966-62d0-4ed1-841b-2be76b1ac5dd	Whoever developed the banking applications, there is no comparison between them and the previous application of the first bank in terms of ease of use.	علوي باعلوي	##########			0	ar	us		1	ar	whoever develop bank applications comparison previous application first bank term ease use	Neutral	Google Play Store	1	0	0
Google Play Store	723f7aa1-1dbe-4ca1-b951-03203480202f	Excellent, God bless you all. What's wrong with you, he is a champion and I swear there are no problems with him.	meleodas Sama	##########			0	ar	us		5	ar	excellent god bless whats wrong champion swear problems	Positive	Google Play Store	1	0	0
Google Play Store	46c9b123-b029-40b0-92ed-37728865bd21	Bad	Ghazi Ghazwi	##########			0	ar	us		1	ar	bad	Neutral	Google Play Store	1	0	0
Google Play Store	49954656-412d-449d-9765-da055a52e667	Very excellent	نايف	##########			0	ar	us		5	ar	excellent	Positive	Google Play Store	0	0	0
Google Play Store	860d10cb-2a12-4ea8-90f5-9dacdb51d9e1	Good.	عبد العزيز سالم	##########			0	ar	us		5	ar	good	Positive	Google Play Store	0	0	0
Google Play Store	665bf73c-f84d-47f1-b6c2-04cc07f7e19d	SABB Bank is well known and those who don't have an account with SABB should quickly deposit their money in it, so they don't regret it when it flows away.	محمد العيد	##########			0	ar	us		5	ar	sabb bank well know dont account sabb quickly deposit money dont regret flow away	Neutral	Google Play Store	0	0	0
Google Play Store	8adf650a-cf9f-4396-90fc-4db5c3ee5f48	After the latest update, the application became a failure and it hangs, and the additional amounts do not appear despite receiving a text message with the deposited amount. Also, when transferring to a Visa account, the due amount and the total amount do not appear. Failed update.	Abdul Ra	##########			5	ar	us		1	ar	late update application become failure hang additional amount appear despite receive text message deposit amount also transfer visa account due amount total amount appear fail update	Negative	Google Play Store	0	1	1
Google Play Store	9e3853e8-353d-4487-ac92-512adb699eed	asfasf	شموخ المسفر	##########			0	ar	us		3	ar	asfasf	Neutral	Google Play Store	0	0	0
Google Play Store	9b8f59fa-0463-4f7f-8ffb-d0922767aca9	Difficulty in use, and there is no power or might except with Allah.	وليد النخيلان	##########			0	ar	us		1	ar	difficulty use power might except allah	Neutral	Google Play Store	1	0	0
Google Play Store	f07f88cc-cfb7-4560-97ba-1c65069e8dac	Easy to use and has excellent development, but the transfer fees are high compared to other banks.	الحفناوي محمد	##########			1	ar	us		4	ar	easy use excellent development transfer fee high compare bank	Positive	Google Play Store	0	0	0
Google Play Store	27cb85e4-609b-4cf1-8cc9-0a5efc343e1a	Excellent very very very	سعد سعيد عبدالغني	2022-07-08 00:12:00			0	ar	us		5	ar	excellent	Positive	Google Play Store	0	0	0
Google Play Store	5e3ab0a5-3581-4265-84ba-3ca35ec92255	Wonderful and easy to use ...	SS S	##########			0	ar	us		5	ar	wonderful easy use	Positive	Google Play Store	0	0	0
Google Play Store	7399bcae-3111-4151-9877-c87bc8116cae	When entering the account number, the numbers are reversed.	Eman Ali	##########			0	ar	us		1	ar	enter account number number reverse	Neutral	Google Play Store	0	1	0
Google Play Store	d68d7b2f-695d-49b9-b151-d28e2ee6961d	Good	Mohamed Salah	##########			0	ar	us		3	ar	good	Positive	Google Play Store	0	0	0
Google Play Store	880ac0f3-2421-45c6-acfa-99564f966131	A fantastic and very practical application.	mhamd Ahmad	##########			0	ar	us		5	ar	fantastic practical application	Positive	Google Play Store	0	0	0
Google Play Store	0fcab532-1503-44da-a7a1-f534bbd422c6	Excellent.	Monzer Gameel	##########			0	ar	us		5	ar	excellent	Positive	Google Play Store	0	0	0
Google Play Store	381a9239-dba5-4da0-85ca-1664ad7d7b90	Unfortunately, it is the same as Riyad Bank and Arab Bank. I tried to register, but at the end it says it is not possible, despite the fact that its requests and questions are numerous, it does not complete the registration process. It wastes your time without any benefit. I have tried to register more than four times, but I end up with empty hands.	محمد Мухаммад	##########			0	ar	us		1	ar	unfortunately riyad bank arab bank try register end say possible despite fact request question numerous complete registration process waste time without benefit try register four time end empty hand	Negative	Google Play Store	1	1	0
Google Play Store	672d14a1-8158-41dc-88c4-f76e9660f839	A very beautiful application.	Ahmed Alatta	##########			0	ar	us		4	ar	beautiful application	Positive	Google Play Store	0	0	0
Google Play Store	1d3b6817-2b34-471a-a1c6-4bf172623393	A great and easy program that saves you time and effort and has high security protection.	حمد محب الرسم والجمال	##########			0	ar	us		5	ar	great easy program save time effort high security protection	Positive	Google Play Store	0	0	0
Google Play Store	e1073599-b7e0-49b7-b500-98b6df7e07b3	Available services	شهد .	##########			0	ar	us		5	ar	available service	Neutral	Google Play Store	0	1	0
Google Play Store	81daa96c-9831-44f7-8509-a00d7a436707	Beautiful.	احمد العبدالكريم	##########			0	ar	us		5	ar	beautiful	Positive	Google Play Store	0	0	0
Google Play Store	5ca427be-0a8f-4ce0-8944-2ef2140557a5	Good.	جتكيز اطاي	2022-07-06 09:35:00			0	ar	us		5	ar	good	Positive	Google Play Store	0	0	0
Google Play Store	bd092d31-a072-4139-985c-88d192a032f9	By God, their poor application is one of the reasons for redirecting my salary.	ناصر الراشدي	2022-07-06 02:17:00			0	ar	us		1	ar	god poor application one reason redirect salary	Negative	Google Play Store	1	0	0
Google Play Store	fca7863f-b3ac-4de6-855f-ee3a29abb812	Bad in conversion, especially if the citizen's account is deposited, it does not convert, cash withdrawal is necessary.	2023-01-01 00:00:00	##########			0	ar	us		1	ar	bad conversion especially citizens account deposit convert cash withdrawal necessary	Negative	Google Play Store	1	1	0
Google Play Store	be7ce251-97da-4372-a60f-ef7ed29fbf51	The worst bank on the face of the earth... !!!	حكيم زمانه	##########			0	ar	us		1	ar	bad bank face earth	Negative	Google Play Store	1	0	0
Google Play Store	6a7505f3-de26-4255-9dc1-34344585b5bc	It raises blood pressure whenever they make a mistake, they immediately impose a ban.	أم خالد	##########			0	ar	us		1	ar	raise blood pressure whenever make mistake immediately impose ban	Negative	Google Play Store	1	1	0
Google Play Store	4f1bc9b9-191d-4fa1-b75d-0d6e86c65b01	Good.	Ali Y.	##########			0	ar	us		4	ar	good	Positive	Google Play Store	0	0	0
Google Play Store	207db134-f3c4-4b1d-b90f-c0c60246d639	Deserves 5 stars. I had a problem and the reason was the system support has stopped because it is old. As for those who complain and have problems, specify your device type, system version, and its brand, so they can find a solution for your problem.	A7 AlJ	##########			0	ar	us		5	ar	deserve star problem reason system support stop old complain problems specify device type system version brand find solution problem	Negative	Google Play Store	0	1	0
Google Play Store	6bc879d7-d7ee-4468-8d52-3b593a79966e	Good.	NAJE ALHABABI	##########			0	ar	us		4	ar	good	Positive	Google Play Store	0	0	0
Google Play Store	86610a7c-89f5-4b83-8b9c-12fd85d25a7c	The method is a bit difficult.	suliman Al mubarak Al mubarak	##########			0	ar	us		2	ar	method bite difficult	Negative	Google Play Store	1	0	0
Google Play Store	156dcce9-c31a-4dcd-8951-6f4d35e5cd32	The best bank and the best application.	Nedal Alhason	##########			0	ar	us		5	ar	best bank best application	Positive	Google Play Store	0	0	0
Google Play Store	08844445-cb51-4f87-a717-79b4d4eb064d	We see updates quite often.	Ali h	2022-07-05 09:41:00			0	ar	us		1	ar	see update quite often	Neutral	Google Play Store	0	1	0
Google Play Store	dbb2e8dd-c15d-4d34-ae9c-ec8754637204	Excellent	marwa Ali Khalyd	##########			0	ar	us		5	ar	excellent	Positive	Google Play Store	0	0	0
Google Play Store	bbbafd7b-2b0c-427d-b757-00d69da2c346	Has improved significantly from before.	Abdulaziz Alkhulifi	##########			0	ar	us		5	ar	improve significantly	Positive	Google Play Store	0	0	0
Google Play Store	76c7efb4-e2da-4bf3-b548-5796e62af3b1	The application is very slow and suddenly it freezes. Sometimes when I try to do something, it freezes or when I check my balance, it takes minutes to show up.	علي الاحمد	##########			0	ar	us		1	ar	application slow suddenly freeze sometimes try something freeze check balance take minutes show	Negative	Google Play Store	0	0	1
Google Play Store	71f12412-4eec-4db2-b2e8-4f7e840f6270	Good	ابو حنان	2022-07-01 03:42:00			0	ar	us		1	ar	good	Positive	Google Play Store	0	0	0
[truncated: 3,131 more rows]
