# Supplementary material for: Retrieval-augmented generation analysis of user reviews in Saudi mobile banking apps: a comparative user experience study of iOS and Android
Source: PeerJ journal article supplement (doi:10.7717/peerj-cs.3565), 2026-02-06
Supplement: Android.zip [file saib_sentiments.xlsx]

## Sheet: Sheet 1 - saib_sentiments
saib_sentiments
source	review_id	review_description	user_name	review_date	developer_response	developer_response_date	thumbs_up	language_code	country_code	app_version	rating	en	cleaned_reviews	Sentiment	Satisfaction	Effectiveness	Efficiency
Google Play Store	cf5d37a3-358e-4e59-91b5-6ddf2f2c90f6	Very, very bad. Many situations surprise you with not being able to enter at all, and with embarrassing situations.	Ahm Baf	##########			0	en	us		1	ar	bad many situations surprise able enter embarrass situations	Negative	1	1	0
Google Play Store	8a92458e-8432-4f61-8f56-54adec336c81	The program is bad and it is a weak interface for a web page. It needs a complete reprogramming.	nayef ali	##########			0	en	us		1	ar	program bad weak interface web page need complete reprogramming	Negative	1	0	0
Google Play Store	42b58384-162c-4ddf-bc50-42226044827e	The worst banking application I have used... It malfunctions when you need it.	edrees gambar	##########			0	en	us		1	ar	bad bank application use malfunction need	Negative	1	1	0
Google Play Store	7329b00f-8b09-4e04-b1f1-86273bbf0eb6	Lack of transparency. Annual fees are calculated and their offers are presented without lifetime fees. There is also a condition that the bank can change the terms and fees without notifying the customer.	Saeed Kanani	##########			0	en	us		1	ar	lack transparency annual fee calculate offer present without lifetime fee also condition bank change term fee without notify customer	Negative	1	1	0
Google Play Store	71c513e5-c79d-44d3-83c7-c22d5f2baca9	This program is very bad. It requests access to your location and messages, and this is unacceptable. Provide me with the service as agreed upon.	sas	##########			0	en	us		1	ar	program bad request access location message unacceptable provide service agree upon	Negative	1	1	0
Google Play Store	9a92474b-d678-40ea-9985-7d59e5ce50b5	The program does not open on Wi-Fi, and it does not open on the mobile data because it gives a message that my phone is jailbroken and the phone is on its original system. I cannot perform operations if I open it on the browser until 48 hours (two days) have passed since it is accessed from a new location. Are you intentionally trying to annoy us?	Hussain Al Mesbah	##########			0	en	us		1	ar	program open wifi open mobile data give message phone jailbroken phone original system perform operations open browser hours two days pass since access new location intentionally try annoy us	Negative	1	1	0
Google Play Store	83f73e14-38f0-408f-97da-91089f95f118	Terrible in every sense of the word, the application has not been working for a while and every time I try to log in, I need to make several attempts for it to open. Almost everyone is suffering from the same problem and the bank has not done anything about it. The application needs an update.	Ahmed Alhashim	##########			0	en	us		1	ar	terrible every sense word application work every time try log need make several attempt open almost everyone suffer problem bank do anything application need update	Negative	1	1	0
Google Play Store	3d4fcd2a-22ca-4123-ad89-3489b99913c0	The worst banking application, it keeps crashing all the time and it's slow.	Mohammed Alomar	##########			0	en	us		1	ar	bad bank application keep crash time slow	Negative	1	1	1
Google Play Store	20869027-f585-4891-a1ba-2b9def902160	I can't log in. I have been trying for a week and the problem hasn't been resolved.	Zakarya Aldukhayil	##########			0	en	us		1	ar	cant log try week problem hasnt resolve	Negative	0	1	0
Google Play Store	ed6bb70a-016d-4794-8d68-73664a04f818	For two days now, the application has not been accepting login attempts!	3n4d Lio	##########			0	en	us		1	ar	two days application accept login attempt	Negative	0	1	0
Google Play Store	7b646f0d-4f40-4cc1-ad01-539c253472c8	The program is one of the worst banking software programs in 2023 and they still use a primitive interface built on a web page.	Ayman Almaghamsi	##########			0	en	us		1	ar	program one bad bank software program still use primitive interface build web page	Negative	1	0	0
Google Play Store	e6e8f482-1831-4168-bc7d-c5322600fe78	A wonderful application	Khalid Moslem	##########			0	en	us		5	ar	wonderful application	Positive	0	0	0
Google Play Store	62b56b48-f8b1-410f-92e3-b5afcbcf11df	The application has a problem, every time I try to enter the number, it kicks me out.	aziz basleem	##########			0	en	us		1	ar	application problem every time try enter number kick	Negative	0	1	0
Google Play Store	3ed7a94a-10c8-43d5-ba5b-729e94427c9d	The application has not been working for more than a week. When I contacted them, they told me to delete the application. Okay, I deleted it and didn't open it for 30 seconds, but there are many excuses, and no improvement. We have been like this for a month and the situation is still the same!	Fair	##########			0	en	us		1	ar	application work week contact tell delete application okay delete didnt open second many excuse improvement like month situation still	Negative	0	1	0
Google Play Store	678767c7-8374-4f5a-8388-ca5fbff0ae0d	The application restarts when reopened on a Huawei device, and the issues have not been resolved despite the time that has passed.	Mohammed Shagroon	##########			0	en	us		1	ar	application restart reopen huawei device issue resolve despite time pass	Negative	0	1	0
Google Play Store	d3d62308-1183-498a-b5b0-b3a7255005f0	The homepage is very very very bad.	Abdo Ashour	2023-07-07 07:55:00			0	en	us		1	ar	homepage bad	Negative	1	0	0
Google Play Store	7186ba8f-4fa6-4b0d-a428-276dfb054301	Bad reviews and the bank is sleeping.	Abdullah Alghunaim	2023-07-06 09:23:00			1	en	us		1	ar	bad review bank sleep	Negative	1	0	0
Google Play Store	b1e8fe81-a6cd-461d-b785-caa8234ba990	One of the worst banking applications, with frequent crashes, freezes, and sudden collapses, and there are no updates to fix the problems or improve the application. The bank should build the application from scratch and use a programming language specifically designed for Android, rather than converting it from the iOS system to Android. It needs a radical change and complete development, and th…	The Lord	##########			0	en	us		1	ar	one bad bank applications frequent crash freeze sudden collapse update fix problems improve application bank build application scratch use program language specifically design android rather convert ios system android need radical change complete development application al rajhi bank good example	Negative	1	1	1
Google Play Store	10b5ff5b-0a84-447a-9b99-68e5cd0431a3	Al Rajhi is better than him/it.	aol	##########			0	en	us		1	ar	al rajhi good himit	Neutral	0	0	0
Google Play Store	3f548dce-3b54-4d7b-a566-299add6b8748	A week or more, it's not working and even the homepage is not working.	Hassan Bokhari	##########			0	en	us		1	ar	week work even homepage work	Negative	0	1	0
Google Play Store	a73ec322-cf03-41dd-82f9-6c07b2cd70f6	It's not acceptable at all! 5,000 ratings, 90% of which are bad and full of complaints, and you still haven't fixed the application's problems! The lowest rating I can see for ordinary applications is higher than yours. What about a banking application! Please update your application because it is unstable and causes trouble for customers, especially during travel. It doesn't open and crashes all…	Abdulqayyum	##########			1	en	us		1	ar	acceptable ratings bad full complaints still havent fix applications problems low rat see ordinary applications high bank application please update application unstable cause trouble customers especially travel doesnt open crash time travel face abnormal difficulties rely bank application customer two years applications issue remain keep crash inside outside saudi arabia unfortunately	Negative	1	1	0
Google Play Store	de1db9d8-6c28-4aca-bfb6-22b25ff0678b	Actually, I wish I could rate it less than one star. The bank application is not allowing me to access my account for two consecutive days!	Esra'a shi	##########			0	en	us		1	ar	actually wish could rate less one star bank application allow access account two consecutive days	Negative	1	0	0
Google Play Store	96aa7892-32f2-44de-a29a-20cbb778642e	Bad, unable to access the account or open the application for over a week.	SAEED ALASMARE	##########			0	en	us		1	ar	bad unable access account open application week	Negative	1	1	0
Google Play Store	1be390e8-43bf-4b1f-b176-ce51d6f29a98	The worst bank in the world with online banking services, the worst application, and a terrible official website. For 6 months, they can't figure out what the problem is. 😂😂😂😂😂😂	mas sam	##########			0	en	us		1	ar	bad bank world online bank service bad application terrible official website months cant figure problem	Negative	1	1	1
Google Play Store	2491cb39-8866-456c-8dfe-01dc3b4db771	The application is called "El3an".	Feyadh Alkhsir	##########			0	en	us		1	ar	application call elan	Neutral	1	1	0
Google Play Store	c9f26092-e148-4900-be7d-9f2ede3f7208	The worst primitive and backward design for a banking application in the history of the Kingdom of Saudi Arabia.	Abdallah Jamal	##########			0	en	us		1	ar	bad primitive backward design bank application history kingdom saudi arabia	Negative	1	0	0
Google Play Store	c78797b4-a5fb-4ee4-a62a-64afc627cb0f	The application is not opening for me for two weeks, it's stuck. What is the solution?	Nns Nns	##########			0	en	us		1	ar	application open two weeks stick solution	Negative	1	0	1
Google Play Store	19b00400-125e-45d4-afae-9b9bcb03c503	the worst/ unsuccessful.	Ali Al-alawi	##########			0	en	us		1	ar	bad unsuccessful	Negative	1	0	0
Google Play Store	d9e2188e-c240-4f56-bdaf-981de800b89e	The program commentator does not log into the account. I tried wrong numbers and it didn't tell me that the number is wrong. It just says there is an error.	alarbge “ONI KING” Abu abd allah	##########			0	en	us		1	ar	program commentator log account try wrong number didnt tell number wrong say error	Negative	0	1	0
Google Play Store	d1dcd8f3-3024-4f4d-88cb-1edb97f67314	Failed bank	Saleh Alghamdi	##########			0	en	us		1	ar	fail bank	Negative	1	1	0
Google Play Store	7ae7c015-9107-407a-bcc4-3f6e23756837	"An extremely bad application.. I have to delete it every time and download it again in order to access my account."	MURTADA ALSABA	##########			0	en	us		1	ar	extremely bad application delete every time download order access account	Negative	1	1	0
Google Play Store	ed5bd161-bbd3-4c29-b0ad-e9ffbe3b63c9	Brother, our internet is bad. Make a lightweight application for us that is free from graphics and unnecessary animations. Make it like the Google Mail app, which has an option that allows users to click on it if the internet is slow, located at the bottom of the Google Mail page.	Khalid Ruddah Alharthi	##########			0	en	us		1	ar	brother internet bad make lightweight application us free graphics unnecessary animations make like google mail app option allow users click internet slow locate bottom google mail page	Negative	1	0	1
Google Play Store	f8a94600-eabf-41c7-8558-6d26bf8f51d7	"After the latest update, I am unable to access my account."	Kmys	##########			0	en	us		1	ar	late update unable access account	Negative	0	1	0
Google Play Store	3f5f530e-6b09-4ebc-a593-0967048da0c2	Bad. Unfortunately, I've been unable to log into my account through the app for almost 3 days. I have to use a desktop every time I want to log in.	kld	##########			10	en	us		1	ar	bad unfortunately ive unable log account app almost days use desktop every time want log	Negative	1	1	0
Google Play Store	00e25c5f-6f80-4ab4-8074-0f5e88f75522	After the latest update, the application is not working at all. Every time I try to enter, it shows an error and takes me back to the login page. Galaxy S23.	Last Dream	##########			0	en	us		1	ar	late update application work every time try enter show error take back login page galaxy	Negative	0	1	0
Google Play Store	97a747e8-10e2-40a6-b4f2-a4caed0ad147	Very primitive design	MESHAL ALHAIMOD	##########			0	en	us		1	ar	primitive design	Negative	1	0	0
Google Play Store	9930698b-4ac8-4c88-bdc2-43168d8952cb	The application is bad. The only feature it has is that I use it as a wallet to keep my money safe and inaccessible so that I can save. It is difficult to access the money in the account because the transfer process is complicated.	abo-yousef	##########			0	en	us		1	ar	application bad feature use wallet keep money safe inaccessible save difficult access money account transfer process complicate	Negative	1	1	0
Google Play Store	31bbcf4c-aa90-4b26-b8ee-80f94d3a2aa5	The application freezes and shuts down, and you are unable to log in.	krooom العنزي	2023-06-05 06:23:00			0	en	us		1	ar	application freeze shut unable log	Negative	0	1	1
Google Play Store	d0641d4b-8f12-4a07-a774-9140f3259ceb	The worst application for the worst bank in the kingdom.	م.فارس القصير	##########			0	en	us		1	ar	bad application bad bank kingdom	Negative	1	0	0
Google Play Store	5ff07b65-6c20-46dc-949e-b87a3744a3e1	Slow, constant lag, and impractical.	H Mohammed	##########			0	en	us		1	ar	slow constant lag impractical	Negative	1	0	1
Google Play Store	db0c047f-bc5e-44fa-949e-e9e6ba36920d	Fail/failure	Jaffar Abdulnabi	##########			0	en	us		1	ar	failfailure	Negative	1	1	0
Google Play Store	f81840fb-764e-4520-804e-13dd99b530d2	And it disconnects and hangs, and it hangs and disconnects, and it disconnects and disconnects, and it hangs and hangs, and God help us.	Tariq al omar	##########			0	en	us		1	ar	disconnect hang hang disconnect disconnect disconnect hang hang god help us	Negative	0	0	1
Google Play Store	c68851c4-6362-4bc2-923c-e4971dcd3312	The application is very unresponsive. I need to restart my phone every time I try to access it.	Raheeb Shadeed	##########			0	en	us		1	ar	application unresponsive need restart phone every time try access	Negative	0	1	1
Google Play Store	cf12acf1-c493-4515-aeda-a1b9bbd7598c	Very slow. It hangs a lot and only opens after several attempts.	Al jr	##########			2	en	us		1	ar	slow hang lot open several attempt	Negative	0	0	1
Google Play Store	e2bd2265-d330-4a9f-9f7d-237be7199ab7	The application is very bad and slow. I wish I knew that before.	Ayman Saleh	##########			0	en	us		1	ar	application bad slow wish know	Negative	1	0	1
Google Play Store	202986e5-3154-4c43-8128-592dca66facd	The application is the worst and there is no one fixing the problems in it.	FalconGM	##########			0	en	us		1	ar	application bad one fix problems	Negative	1	0	0
Google Play Store	6475a996-4e49-4700-b2b2-22e00ec596d0	The application Filo has some problems.	Nasser Aldhahri	##########			0	en	us		1	ar	application filo problems	Negative	0	1	0
Google Play Store	520e2c18-b120-4e7f-b341-b25db825b069	Very bad	Mr.fayezmohad Ali	2023-05-02 05:40:00			0	en	us		1	ar	bad	Negative	1	0	0
Google Play Store	1b4a8faa-f92b-425d-ad26-e8adce1b8828	The application is not working.	John Smath	##########			0	en	us		1	ar	application work	Negative	0	1	0
Google Play Store	5e7c9423-1417-4cf0-a5f5-05517ba59787	The bank application crashes and shuts down by itself, this is new. By God, how long will this failure continue? It's a shame for a bank of this level to have such the worst information technology at this extent.	Fahad Alfawzan	##########			0	en	us		2	ar	bank application crash shut new god long failure continue shame bank level bad information technology extent	Negative	1	1	0
Google Play Store	df1e2576-1930-4a80-bf20-de383ee28bba	There is a problem with the registration. I contacted the bank and they said there is an issue with the software that needs an update in two weeks. I am unable to use the program. 😞	bahaa gashgry	##########			1	en	us		2	ar	problem registration contact bank say issue software need update two weeks unable use program	Negative	0	1	0
Google Play Store	21df98bf-c79d-4382-aee9-f65dca522d7d	Very bad, too much criticism.	Majed Tawfiq	2023-04-09 01:13:00			0	en	us		1	ar	bad much criticism	Negative	1	0	0
Google Play Store	6120e198-4677-43ff-a6e5-b360bedcefb4	The application doesn't open... it is the most failed bank in the history.	JuVE Palestine	2023-04-04 08:24:00			0	en	us		1	ar	application doesnt open fail bank history	Negative	0	1	0
Google Play Store	38ab169d-210d-4066-80da-f6c73bc8bb64	One of the worst banks in terms of policy, dealings, and implementation.	Tito Donova	##########			0	en	us		1	ar	one bad bank term policy dealings implementation	Negative	1	0	0
Google Play Store	e5ea7aee-687a-4ad6-930d-3ff4d114b89f	A very unsuccessful application, I mean just logging in causes it to bring you diseases.	Mohamed. .-ksa	##########			1	en	us		1	ar	unsuccessful application mean log cause bring diseases	Negative	1	1	1
Google Play Store	a11ff2c1-7749-4854-850e-f2f086a02d6a	Continuous login problems every period, it hangs a lot and always has issues and delays in response. It is a bad user experience and I might consider finding another bank that I can rely on its electronic services.	مجتبى المشرف	##########			0	en	us		2	ar	continuous login problems every period hang lot always issue delay response bad user experience might consider find another bank rely electronic service	Negative	1	0	1
Google Play Store	4934d9b1-2aa7-4603-b9cc-7fa5ac452526	If you do not log in during the month, the application will close and you will have to use the mobile banking for two days! General policies in 1415.	Yazeed Mogran	##########			1	en	us		1	ar	log month application close use mobile bank two days general policies	Neutral	0	1	0
Google Play Store	ccf2ec34-597f-41fa-9dd0-1385007b39c8	The application is slow, hangs frequently, and often rejects login attempts.	waleedn900	##########			0	en	us		1	ar	application slow hang frequently often reject login attempt	Negative	1	0	1
Google Play Store	9d17762a-c0d6-4de5-b510-eccbd26fef8d	The bank is deteriorating technologically. It is absolutely not possible to rely on the application.	Mohammed Aldrees	##########			0	en	us		1	ar	bank deteriorate technologically absolutely possible rely application	Negative	1	0	0
Google Play Store	957b7d0e-c864-480f-8b7d-612cc5d5c873	Very very very very very bad application	عبدالله محمد	##########			0	en	us		1	ar	bad application	Negative	1	0	0
Google Play Store	aea8ab92-3253-48c8-b79f-2718df860253	The application does not keep up with the development of banking services.	Essam Hasan	##########			0	en	us		1	ar	application keep development bank service	Negative	1	0	0
Google Play Store	fd67ad76-8091-4458-a61e-66cc233b21b9	The application used to be excellent, but today it has become very bad. I cannot access my account more than ten times. It sends me the login code, and I enter it correctly many times, but it always tells me it's incorrect. How can I access my account?	Saleh Saleh	##########			0	en	us		1	ar	application use excellent today become bad access account ten time send login code enter correctly many time always tell incorrect access account	Negative	1	1	0
Google Play Store	2a0ce9e9-e534-41c1-bf06-8c54a8fb11a7	Unfortunately, the application is very bad and does not meet the customers' expectations. Neither in terms of the application interface nor in terms of the application's usability. I hope you learn from applications like Al Rajhi and Al Ahli. Thank you.	سعيد الزهراني	##########			0	en	us		1	ar	unfortunately application bad meet customers expectations neither term application interface term applications usability hope learn applications like al rajhi al ahli thank	Negative	1	0	0
Google Play Store	b977a37d-bc16-4c0e-abfa-e49937c106eb	Very bad and unprofessional bank.	Shahd Alforaih	##########			0	en	us		1	ar	bad unprofessional bank	Negative	1	0	0
Google Play Store	93d7f783-24af-4ec2-8614-5158313adc63	The application is very laggy and slow to respond most of the time, and there are many errors. Unfortunately, the application does not match the services and reputation of Saudi Investment Bank. The application needs to be developed to keep up with what the bank offers. Nowadays, the application has become more important than the branch, and currently, it represents the bank in a bad way. I am wa…	Mohammed Nasser	2023-02-09 04:20:00			1	en	us		1	ar	application laggy slow respond time many errors unfortunately application match service reputation saudi investment bank application need develop keep bank offer nowadays application become important branch currently represent bank bad way wait new version application improve current one regard update february unfortunately improvement problems increase point consider transfer salary another bank…	Negative	1	1	1
Google Play Store	9db75525-dd00-485c-82b0-11c54c831037	Thank you, but after the latest update, the application is still very bad and full of problems and errors.	Abos3d	##########			0	en	us		1	ar	thank late update application still bad full problems errors	Negative	1	1	0
Google Play Store	f00bf6ad-9b45-45e5-b305-00a900c92672	I couldn't use it, the application has a virus!	〰	##########			0	en	us		1	ar	couldnt use application virus	Negative	0	1	0
Google Play Store	7e043154-3b3a-41fa-a534-519ea560bbe2	Bad application and does not work on Samsung.	Ahmad Saeed	##########			1	en	us		1	ar	bad application work samsung	Negative	1	1	0
Google Play Store	c0345250-3021-4e19-831a-b63332199f4b	Brother, the program is very very slow, it needs to change and be like other banks.	Hammad Hmod	##########			0	en	us		1	ar	brother program slow need change like bank	Negative	0	0	1
Google Play Store	cec42804-4f83-423f-8971-b7224104662a	Very, very, very, very bad.	Mona Al-Ajmi	##########			0	en	us		1	ar	bad	Negative	1	0	0
Google Play Store	0da4f53b-c5b3-4338-b7ef-ca749920980c	Bad and slow application.	sulaiman aldokhayel	##########			0	en	us		1	ar	bad slow application	Negative	1	0	1
Google Play Store	c6dfa6cb-9d74-4675-b24b-4864a1b3b69f	Many mistakes	Abdulhadi Alharbi	##########			0	en	us		2	ar	many mistake	Negative	1	0	0
Google Play Store	518fc607-83b3-429b-9c17-50d3b1d9088b	A very primitive application that you would be surprised that a bank has such the worst and stupid application in this way... What's even more strange is that the bank manager, board of directors, and employees all use the application and see how stupid and deteriorated it is, yet they continue to live with it!	F 63	##########			2	en	us		1	ar	primitive application would surprise bank bad stupid application way whats even strange bank manager board directors employees use application see stupid deteriorate yet continue live	Negative	1	0	0
Google Play Store	94276d4d-7d79-4728-b922-96db30b8f923	(The application is not working) Unfortunately, the bank does not show interest in regularly updating the application and solving the problems faced by users. There is no support for timely system updates or keeping up with the advancements and features available in other banking applications.	Abdullah AlMabdi	##########			3	en	us		1	ar	application work unfortunately bank show interest regularly update application solve problems face users support timely system update keep advancements feature available bank applications	Negative	1	1	0
Google Play Store	eb046134-7292-4e87-8f66-aaaa329b39c1	By God, every time I write a comment and delete it ... I couldn't describe how bad this application is, and I switched to other banks because of the very poor electronic services they provide.	Abdullah Y. Alsarraj	##########			1	en	us		1	ar	god every time write comment delete couldnt describe bad application switch bank poor electronic service provide	Negative	1	1	0
Google Play Store	bf5ae679-7d54-41a3-9462-93352e648d61	Very bad, unfortunately, it freezes a lot and many of the commands do not respond.	Faris Abdulaziz	##########			1	en	us		1	ar	bad unfortunately freeze lot many command respond	Negative	1	0	1
Google Play Store	8682021a-3bc8-4dc4-b535-f9cd902d11e1	It is not reliable; it frequently hangs.	Aziz Mansour	##########			0	en	us		1	ar	reliable frequently hang	Negative	0	0	1
Google Play Store	396d7c09-7402-46f0-b7ef-c180b1b7416c	Very bad and complicated in terms of accessing and benefiting from the services.	Saleh Alsuhaibani	##########			0	en	us		1	ar	bad complicate term access benefit service	Negative	1	1	0
Google Play Store	d85f9515-9084-4093-a961-a9f5e744e8d5	The application has all the required services.. but the main problem in it is the difficulty of accessing it.. there is always a problem with logging in.. please fix the problem.	Hisham Albassam	##########			0	en	us		4	ar	application require service main problem difficulty access always problem log please fix problem	Negative	1	0	0
Google Play Store	8365207c-15dc-4e7d-9e7d-2df0e6465c22	Very, very bad.. And the biggest mistake is that I relied on the application for traveling, and God it's a disaster. I need money on my card and the application freezes, it won't open.. With all due respect to them, but it's the worst financial application I've tried.	Khaled Badeeb	##########			0	en	us		1	ar	bad big mistake rely application travel god disaster need money card application freeze wont open due respect bad financial application ive try	Negative	1	1	1
Google Play Store	aed1419e-06da-476b-9884-62c8135e52c8	The worst banking application ever. It is slow and errors occur during login, with 8 out of 10 attempts failing. Months go by without any updates to improve performance or fix the application's bugs.	رائــد	##########			0	en	us		1	ar	bad bank application ever slow errors occur login attempt fail months go without update improve performance fix applications bug	Negative	1	1	1
Google Play Store	0255f801-5d79-476c-b643-6fd788ea8249	Bad application full of problems	bassam asaad	##########			0	en	us		1	ar	bad application full problems	Negative	1	0	0
Google Play Store	b297ef51-df9a-47d5-99f1-90a71b205208	The application is simply a redirection to the bank's website. Open the bank through the browser to make a transaction.	Saleh Almohaimeed	##########			0	en	us		1	ar	application simply redirection bank website open bank browser make transaction	Neutral	0	1	0
Google Play Store	62361384-0708-4464-b124-0df5e34fec09	It is impractical and not reliable to rely on the application. I will withdraw from the bank.	Khalid debaisy	##########			0	en	us		1	ar	impractical reliable rely application withdraw bank	Negative	1	0	0
Google Play Store	622881b3-c981-468d-8742-5cde37853faf	The application is very, very, very bad. I usually don't write reviews, but this one compelled me to do so, especially if it involves a passport. I'm done with all my transactions with the bank. I am not obliged to suffer like this. That's it.	Suliman Only	##########			1	en	us		1	ar	application bad usually dont write review one compel especially involve passport im do transactions bank oblige suffer like thats	Negative	1	0	0
Google Play Store	7d4f3577-6a45-4c8c-96b5-c052d8915b21	The program has become unsuccessful recently. The passport page hangs when any amount is added!	Ahmad Almousa	##########			2	en	us		3	ar	program become unsuccessful recently passport page hang amount add	Negative	1	1	1
Google Play Store	9be32038-f9ac-4b2f-a937-26360318c3a2	Very very bad application, error message appears in every process I perform, and the performance is very slow and terrible. Some operations take a long time to complete, and most of the time the application stops working and exits. It requires re-entry again, especially when converting to a passport card, the situation is unbelievable because it takes minutes for the process to be completed. It's…	Mohammed Alanazi	##########			0	en	us		1	ar	bad application error message appear every process perform performance slow terrible operations take long time complete time application stop work exit require reentry especially convert passport card situation unbelievable take minutes process complete truly bad experience	Negative	1	1	1
Google Play Store	1e5d9a92-63a4-47e8-88d0-b2f67e4a2df5	You receive a message stating that the connection is using a VPN. You need to turn off the Wi-Fi, otherwise it won't work. I don't have a VPN application on my mobile phone anyway, but the app is not functioning properly.	mohammed alyami	##########			1	en	us		1	ar	receive message state connection use vpn need turn wifi otherwise wont work dont vpn application mobile phone anyway app function properly	Negative	0	1	0
Google Play Store	2e45e914-345a-4dad-a011-08185292e128	Always malfunctioning and in general, the entire bank is always under maintenance.	FSM	##########			0	en	us		1	ar	always malfunction general entire bank always maintenance	Negative	1	1	0
Google Play Store	dd02a2fe-3211-4eaa-abfc-a8d63382544c	Many flaws and mistakes.	HUSSAIN ALI	##########			0	en	us		1	ar	many flaw mistake	Negative	1	0	0
Google Play Store	e215dc55-7a35-45f0-a394-30fe2fb1be0a	It works once and breaks down 10 times.	Zamo	##########			0	en	us		2	ar	work break time	Neutral	0	1	0
Google Play Store	1683012f-5600-4034-b723-2796b3603204	the worst and sterile program that doesn't work due to frequent crashes and it is not possible to add any amount to the credit card for months now. In short, the worst bank that does not listen to its customers.	MAJED ALJOHANI	##########			0	en	us		1	ar	bad sterile program doesnt work due frequent crash possible add amount credit card months short bad bank listen customers	Negative	1	1	0
Google Play Store	bc2f86a7-5d2b-4ef7-9d31-5a17b853ea57	Very slow and very old compared to all other banking applications.	Qusai Ali	2022-09-05 09:27:00			2	en	us		1	ar	slow old compare bank applications	Negative	0	0	1
Google Play Store	f1309fb6-56d6-440c-8630-5da45eebf64f	The program almost doesn't work on Samsung S22+ mobile phones.	M S	##########			0	en	us		1	ar	program almost doesnt work samsung mobile phone	Negative	0	1	0
Google Play Store	d70af225-982b-4219-947a-cd349ed083fd	Bad hangs a lot.	M D	##########			2	en	us		1	ar	bad hang lot	Negative	1	0	1
Google Play Store	83354de1-6e9b-45e7-aa93-6cee9bc519ba	The application has become very slow and I cannot switch between my accounts.	Rashid Ali	##########			0	en	us		1	ar	application become slow switch account	Negative	0	0	1
Google Play Store	4ff38223-6259-4c11-8815-ba85f880d98c	Guys, be ashamed of yourselves. Give us a decent application like everyone else, it's truly shameful, I swear it's disgraceful and ridiculous. May God darken your faces.	Abos3d	##########			3	en	us		1	ar	guy ashamed give us decent application like everyone else truly shameful swear disgraceful ridiculous may god darken face	Negative	1	0	0
Google Play Store	e39f8137-ea27-463b-8623-786ade29dd07	1- The program is slow and crashes frequently, and you can't do anything without it crashing on you. 2- The bank employees are rude and not helpful at all, and there isn't even much crowding. 3- We only have one main branch and it is far away. 4- It is difficult to send money to some foreign countries, and it takes several months. Please close my account with you as there are much better options …	unnamed unknown	##########			2	en	us		1	ar	program slow crash frequently cant anything without crash bank employees rude helpful isnt even much crowd one main branch far away difficult send money foreign countries take several months please close account much good options available	Negative	1	1	1
Google Play Store	9b3c0447-a487-4330-922d-e60f45d9980e	He is slow and has many problems.	Majed	##########			0	en	us		1	ar	slow many problems	Negative	0	1	1
Google Play Store	cb5a53ac-c09a-4e07-882c-54a180a3f7ff	Very bad application, it always crashes and is always slow. Bad IT support.	Mohammed Alofaysan	##########			0	en	us		1	ar	bad application always crash always slow bad support	Negative	1	1	1
Google Play Store	5d4ce7b3-ed3b-4d08-9c07-ebedcb60b720	The application is very bad.	Nasser Alawami (Sayed)	##########			1	en	us		1	ar	application bad	Negative	1	0	0
Google Play Store	10f29f9a-9c16-4182-a961-2c3b4382bef5	the worst application	azooz ebrahim	##########			0	en	us		2	ar	bad application	Negative	1	0	0
Google Play Store	b3bda7de-b5ad-465e-8fee-66446dc95fa3	The worst banking application in my life, I cannot add money to my travel card, nor can I retrieve it, and I cannot view the card information. It keeps kicking me out of the application.	AB	##########			0	en	us		1	ar	bad bank application life add money travel card retrieve view card information keep kick application	Negative	1	1	0
Google Play Store	fe43592a-98f8-40a4-92ff-4ce87e267a96	The worst banking application without a doubt, with abnormal lag and heaviness.	Salvic_18 •	2022-08-06 08:04:00			0	en	us		1	ar	bad bank application without doubt abnormal lag heaviness	Negative	1	0	1
Google Play Store	8fc57b46-cb38-47ae-aabf-7df79f224216	Frequent daily malfunctions of one of the most used banking applications.	Bacem	##########			0	en	us		1	ar	frequent daily malfunction one use bank applications	Negative	0	1	0
Google Play Store	cef35198-6bb3-4e4a-9cee-8f9e221da342	The application goes from bad to worse. It has problems, lags, and crashes. It lacks a fingerprint feature and there is no quick login.	Fayez Shaybah	##########			0	en	us		1	ar	application go bad bad problems lag crash lack fingerprint feature quick login	Negative	1	1	1
Google Play Store	9d7293c1-5ab0-4dee-9535-148dcfcd451f	If I could rate it zero, I would. The program is extremely slow and crashes 4 times during every currency addition process for the travel card.	Saud Aljarbou	2022-08-03 09:38:00			0	en	us		1	ar	could rate zero would program extremely slow crash time every currency addition process travel card	Negative	1	1	1
Google Play Store	59ba65a6-f45b-484c-9a33-571d662ff60f	It's really bad and especially frustrating when trying to convert to a travel card. The Enma' app is much better.	MohammedRMA	##########			0	en	us		1	ar	really bad especially frustrate try convert travel card enma app much good	Negative	1	1	0
Google Play Store	3d8493d9-c2d8-4030-a3b8-2f36507a2149	The application has many bugs and is very bad on devices, and the officials are not interested. We raised several complaints without any benefit...	Hamad Shahbal	##########			0	en	us		1	ar	application many bug bad devices officials interest raise several complaints without benefit	Negative	1	1	0
Google Play Store	700528c5-50d7-4ae0-bfd8-cec141d67ad2	Old and slow application; needs a radical change.	Mohammad Al-Mutairi	##########			0	en	us		1	ar	old slow application need radical change	Negative	1	0	1
Google Play Store	51145004-5073-4497-ac82-be3071e3657d	The user interface is very bad and the application is slow, it freezes between each page.	Abdulmajeed Ibrahim	##########			0	en	us		2	ar	user interface bad application slow freeze page	Negative	1	0	1
Google Play Store	1f2649a2-16b5-4de9-b181-aa2c50ea4e47	A primitive, failed, and inflexible application lacking professionalism in facilitating interaction with icons and clarity, with delays in transitioning from one page to another, no response to messages and inquiries, and ignoring them in the messages icon. There is no direct technical support or customer service chat available through the application. Very illogical delay in responding to phone …	Rayan Bin Abdullah	##########			0	en	us		1	ar	primitive fail inflexible application lack professionalism facilitate interaction icons clarity delay transition one page another response message inquiries ignore message icon direct technical support customer service chat available application illogical delay respond phone call recommend close account soon god will	Negative	1	0	1
Google Play Store	7f783843-40ca-40e9-8887-07c59348086b	I enter and it asks me to agree to the terms and I accept, although I have read and clicked, it does not move to the next page.	K S	##########			0	en	us		1	ar	enter ask agree term accept although read click move next page	Neutral	1	1	0
Google Play Store	c4e4db9c-c027-405a-8c45-c01e81d20f1b	The bank is excellent, but unfortunately the application does not match the size of the bank.	Muteb Sultan	##########			0	en	us		2	ar	bank excellent unfortunately application match size bank	Negative	1	0	0
Google Play Store	da5ca7d4-c1b1-45f1-ab2c-11c9d1f8dc1d	The worst bank application you can ever experience in your life. It is just a website interface with constant freezing and does not support biometric login. It feels like you're in the year 2000.	Mohanad Al Amer	##########			0	en	us		1	ar	bad bank application ever experience life website interface constant freeze support biometric login feel like youre year	Negative	1	0	1
Google Play Store	4aa8bf2c-e341-427c-b191-0f32cb982481	🟦 I found a solution for you 👍 Log into your Flasclick account using your mobile phone and you'll find everything working 100%.	BaSeL	##########			2	en	us		1	ar	find solution log flasclick account use mobile phone youll find everything work	Positive	0	1	0
Google Play Store	83ea05d6-d68e-414b-bb49-4088bbc55a3c	Continuous review and exit from the application when feeding travel card.	Omar Y	##########			0	en	us		1	ar	continuous review exit application feed travel card	Neutral	0	1	0
Google Play Store	f710b011-4edf-4cd5-929d-52047a45dffd	The application is very bad and constantly crashes.	Mohammad Al-Dossary	##########			0	en	us		1	ar	application bad constantly crash	Negative	1	1	1
Google Play Store	0f261ab2-3de6-4c4d-95dd-df9e585e4eff	"Evil with honor"	Turki Alasmari	2022-07-07 02:07:00			0	en	us		1	ar	evil honor	Negative	1	0	0
Google Play Store	5e8c19f6-936e-4c12-a1e1-b8605cd14a3d	I have been trying to renew my travel card for 6 months, but I am struggling with updating it. Even after almost a year, the program still hangs and no improvements have been made.	Mohammed Alamer	##########			1	en	us		1	ar	try renew travel card months struggle update even almost year program still hang improvements make	Negative	0	1	1
Google Play Store	9604afbf-f314-48a8-999c-6618d3b69d16	Response lag	Ibrahim Fahad	##########			0	en	us		1	ar	response lag	Negative	1	0	0
Google Play Store	68fd83f5-6904-4c69-95d8-590034d95f3c	What is good is subject to improvement.	khaled saud	##########			0	en	us		1	ar	good subject improvement	Positive	0	0	0
Google Play Store	148d29cf-e1fc-44d1-a8bc-c1c2f0bc5a13	How long will it take for you to fix the whole program? It keeps freezing and crashing.	Ibrahim Ali	##########			1	en	us		1	ar	long take fix whole program keep freeze crash	Negative	0	1	1
Google Play Store	d06864d6-2fd2-42af-b6a1-5ff0c8e26930	A terrible application in every sense of the word.	Saad Saad	##########			0	en	us		1	ar	terrible application every sense word	Negative	1	0	0
Google Play Store	a266890e-b89f-42c7-a1f7-4c33382d381c	The worst banking application I have ever tried, it freezes and impossible to use.	Nizar a	##########			0	en	us		1	ar	bad bank application ever try freeze impossible use	Negative	1	1	1
Google Play Store	ea347275-750f-4d4c-9d1b-79b34b4f8527	I'm sorry, I cannot access the travel card.	Fatimah Mohammed Alzayer	##########			0	en	us		1	ar	im sorry access travel card	Negative	0	1	0
Google Play Store	cce6a029-a684-4e58-b314-09a40838830a	The worst bank application I have ever used in my life. It always freezes and is slow. At first, I thought it was because my phone is old, but it's still the same disappointment even after buying a new phone. I hope it gets fixed.	Khaled	##########			1	en	us		1	ar	bad bank application ever use life always freeze slow first think phone old still disappointment even buy new phone hope get fix	Negative	1	0	1
Google Play Store	ee26652a-2138-41fd-8c87-5a7765b438db	The worst banking application in the universe.. Every time you try to do something, it freezes.	M7	##########			1	en	us		1	ar	bad bank application universe every time try something freeze	Negative	1	0	1
Google Play Store	04b31be8-d11b-4167-b541-9418f943cb56	It depends if I want to change or retrieve from the passport.	ABDULLAH ALNUWAISER	##########			1	en	us		1	ar	depend want change retrieve passport	Neutral	0	1	0
Google Play Store	72b72b58-5e12-4712-b348-7fd8a141ef84	It is bad and always hangs.	Mohammad Albaqshi	##########			1	en	us		1	ar	bad always hang	Negative	1	0	1
Google Play Store	9a539c03-ad6a-408b-87cc-b4d1abd83e8c	A very bad application, I don't know when they will release an update for the program. Learn from Al Rajhi.	Abdulrahman A	##########			1	en	us		1	ar	bad application dont know release update program learn al rajhi	Negative	1	1	0
Google Play Store	29442c2d-f282-4fc3-8038-e69524d9a66c	The application freezes and crashes on the currency addition page in the travel card as soon as I start it. It hangs and the application doesn't move anymore.	Legend	##########			1	en	us		1	ar	application freeze crash currency addition page travel card soon start hang application doesnt move anymore	Negative	0	1	1
Google Play Store	92cf724b-0d1a-4713-8eea-7a89c7cbc2cb	Unfortunately, the application has become very laggy. I tried cleaning the cache and restarting my phone, as well as uninstalling and reinstalling the app, but the problem remains the same. I hope a new version can be made with a different mechanism to optimize and speed up the application.	Nizar Yamani	##########			0	en	us		1	ar	unfortunately application become laggy try clean cache restart phone well uninstalling reinstall app problem remain hope new version make different mechanism optimize speed application	Negative	1	1	1
Google Play Store	5d7cc7df-07d8-408f-9313-d6938bdd9da6	The application is very bad, I can never access my account. I kindly request that you fix the issue.	Samooo Vision	##########			0	en	us		1	ar	application bad never access account kindly request fix issue	Negative	1	1	0
Google Play Store	5a2502b0-8cf0-405f-95fa-7c6ef6a0dfe6	Garbage	AlSayed Mohammed	##########			0	en	us		1	ar	garbage	Negative	1	0	0
Google Play Store	5b0e4bed-35d0-4224-a77b-31f8df389ac8	The mobile banking application frequently freezes, and the dashboard's interaction and service display are primitive compared to other banks. It doesn't even have a dark theme for the eyes. I hope they release an update to improve these matters. Thank you.	Ibrahim Almehrej	##########			1	en	us		1	ar	mobile bank application frequently freeze dashboards interaction service display primitive compare bank doesnt even dark theme eye hope release update improve matter thank	Negative	1	0	1
Google Play Store	74f622ee-3bac-4b92-95f3-54a104221d78	It hangs.	Al pies	##########			0	en	us		1	ar	hang	Neutral	0	0	1
Google Play Store	a8243e9a-b87d-4da9-81bb-293a4f817360	It hangs a lot and browsing speed needs to be updated.	عدي الثمالي	##########			0	en	us		2	ar	hang lot browse speed need update	Negative	0	0	1
Google Play Store	4e99311e-be5b-4351-bfbb-15d22c261752	Incredible slowness	Abdurahman Almatrodi	2022-06-06 06:13:00			0	en	us		1	ar	incredible slowness	Negative	0	0	1
Google Play Store	51f92469-58f1-4d97-a546-b66bea05f9c6	It has become very bad and gets stuck when adding an amount to the travel card.	Ali Ghumgham	##########			0	en	us		1	ar	become bad get stick add amount travel card	Negative	1	0	1
Google Play Store	07d6ec76-4175-440c-8c61-a33aaddc5628	The worst banking application.	MohammedAH	##########			0	en	us		1	ar	bad bank application	Negative	1	0	0
Google Play Store	2cd82db4-513d-4876-a102-071d587c4bfe	The worst banking application by far.	Fawaz Alobaid	##########			0	en	us		1	ar	bad bank application far	Negative	1	0	0
Google Play Store	2dba5c22-4e92-4927-8d0c-8108025fe771	The application is going from bad to worse. I am facing a problem with browsing the application, and I always receive a notification of unresponsiveness.	AHMAD AL MUDHAFFAR	##########			0	en	us		1	ar	application go bad bad face problem browse application always receive notification unresponsiveness	Negative	1	1	0
Google Play Store	cc1cc389-ba02-488b-9216-e8c6eac634cd	They should give you first place in the most laggy and crashing application... Very bad experience.	Aziz Alshehri	##########			0	en	us		1	ar	give first place laggy crash application bad experience	Negative	1	1	0
Google Play Store	80149e76-5309-44d1-914c-946932794b7f	The worst and slowest application, please learn from the competing banks.	Faisal Alharbi	##########			0	en	us		1	ar	bad slow application please learn compete bank	Negative	1	0	1
Google Play Store	1285d745-243f-4982-b3fb-43baf6757c41	Inability to see the categorization of expenses as announced on social media platforms.	Abdullah Hassan	##########			0	en	us		2	ar	inability see categorization expense announce social media platforms	Neutral	0	1	0
Google Play Store	818f4409-4d26-4f63-acab-dbc39e10af8a	"The application is bad and the customer service is bad. When you apply for a Visa card, the employee welcomes you, but when you want to close it and go to the branch, they tell you to do it through the application, which is very poor and always crashes. It's a waste of time."	ahmed Alattas	##########			0	en	us		1	ar	application bad customer service bad apply visa card employee welcome want close go branch tell application poor always crash waste time	Negative	1	1	0
Google Play Store	8cb31e40-4181-432f-82a5-3d71eb2bc671	It malfunctions a lot and the application is very slow, you need to solve the problem.	Squall Leonhart	##########			0	en	us		1	ar	malfunction lot application slow need solve problem	Negative	0	1	1
Google Play Store	4a5d7bf9-4dbe-47c0-b961-aa4ed687d8a0	The application is being updated annoyingly.	Afaf Afaf	##########			1	en	us		1	ar	application update annoyingly	Negative	1	1	0
Google Play Store	2b1a9188-85f9-4cb9-b93e-bd97351e1d1d	Since the last update, it has been freezing and not giving any chance to use it.	khaled h	##########			1	en	us		1	ar	since last update freeze give chance use	Negative	0	0	1
Google Play Store	28693137-8691-42ec-9bfe-4542b263cf1f	The worst program in history, comments and crashes. It's clear that you don't have the skills to build it on Android, you just copied and pasted it from iOS without adapting it to Android. Your program is useless.	Abdurrhman Arrasheed	##########			1	en	us		1	ar	bad program history comment crash clear dont skills build android copy paste ios without adapt android program useless	Negative	1	1	1
Google Play Store	8f803370-03e2-456f-bb53-c9bd5b251c3b	It's slow and constantly crashes for me for a month, so I can't recharge my Visa through the application.	Abdullah .A.K	##########			2	en	us		1	ar	slow constantly crash month cant recharge visa application	Negative	0	1	1
Google Play Store	b2b31962-88ea-47e6-a01d-cb1b9226b734	Your program is freezing, crashing, and running slowly. It often closes by itself. Where is your support to find a solution?	FOX DE.	##########			1	en	us		1	ar	program freeze crash run slowly often close support find solution	Negative	1	1	1
Google Play Store	2905765d-57e5-4b10-b997-b18405f2a2d8	The program hangs significantly, especially when accessing the credit card page.	احمد سليمان	2022-05-04 06:43:00			1	en	us		1	ar	program hang significantly especially access credit card page	Negative	0	1	1
Google Play Store	1fc0e22c-fe50-4af8-9337-58ed73203c9b	When I tried to update the application through Google Play Store, it showed me that the application has a risk of containing a virus, and it is advised not to download the application.	Muthana Hugail	2022-05-03 08:49:00			0	en	us		3	ar	try update application google play store show application risk contain virus advise download application	Negative	0	1	0
Google Play Store	ec67836e-4260-4d45-abb0-1440fb255646	The application is not working, the latest update is showing a virus threat on the Android application and it poses a danger to your bank accounts. Immediate intervention from the bank is required to solve the problem.	khalifem	##########			2	en	us		1	ar	application work late update show virus threat android application pose danger bank account immediate intervention bank require solve problem	Negative	0	1	0
Google Play Store	4b547eda-ed9b-4da4-967d-d40c0c8a008f	Very very bad and I'm surprised that a bank of this size and investment capacity is unable to provide a functional application like other banks. It's evident from the low ratings that the application is problematic.	A. Alohali	##########			2	en	us		1	ar	bad im surprise bank size investment capacity unable provide functional application like bank evident low ratings application problematic	Negative	1	0	0
Google Play Store	b240a2fe-21c7-464c-98d0-517ea8cde254	The program is very ugly and slow, and there are many problems.. The user experience is very bad.	Abdulrahman Alyahya	##########			2	en	us		1	ar	program ugly slow many problems user experience bad	Negative	1	0	1
Google Play Store	f095e9af-d7d2-4d5a-9a98-6123edfb47e4	It doesn't work.	Aljawharah Alrasheed	##########			2	en	us		1	ar	doesnt work	Negative	0	1	0
Google Play Store	c93191ce-469e-4a3f-9da8-f0f7e05830bf	The application has a technical glitch, so if it is not rectified by the bank, no one will be able to download it and it will be a source of virus for all mobile devices. It is advisable to delete it completely to avoid your account being hacked and losing your money. If the issue is fixed, the comment will be deleted. I hope.	D. Yso	##########			3	en	us		1	ar	application technical glitch rectify bank one able download source virus mobile devices advisable delete completely avoid account hack lose money issue fix comment delete hope	Negative	0	1	0
Google Play Store	e6c26e66-2249-4baa-98e1-2bec320128d2	The device's virus scanner gives a warning about the presence of a virus in the new update.	Hussain Al-Nasser	##########			3	en	us		1	ar	devices virus scanner give warn presence virus new update	Neutral	0	1	0
Google Play Store	80984785-0b0f-45af-a98c-0a7ff057706a	- It may be the worst banking application. With the latest update, my phone tells me that the application is infected and should be removed immediately. - I am traveling and I want to recharge my travel card with an amount of money. I reach the page to enter the desired amount in one of the currencies, but the application freezes and there is no solution other than exiting it. - I have been suffe…	MnD DSI	##########			4	en	us		1	ar	may bad bank application late update phone tell application infect remove immediately travel want recharge travel card amount money reach page enter desire amount one currencies application freeze solution exit suffer stupid application two years close account oblige tolerate	Negative	1	1	0
Google Play Store	7bcacb9f-e0a7-40c5-b00c-4db385e8ef5d	Slow and freezing, it used to be one of the fastest banking applications, but now it has become very slow.	N. A.A	##########			1	en	us		2	ar	slow freeze use one fast bank applications become slow	Negative	1	0	1
Google Play Store	78a0a968-3cdc-4adf-8f83-1bb393b3a1cf	However, the application always freezes and is slow after the latest update. The device gives a warning about the presence of a virus and it has been deleted!	Mohammed Alyahya	##########			3	en	us		1	ar	however application always freeze slow late update device give warn presence virus delete	Negative	1	0	1
Google Play Store	9ece1391-57d9-4693-9f66-ddf42f54f797	After adding the credit account feature to the travel card, the situation has become very bad, an abnormal comment. In addition, the Android system shows me warnings of a virus in the bank application and advises to remove it!!	MUSAB AL-MATRAFI	##########			5	en	us		1	ar	add credit account feature travel card situation become bad abnormal comment addition android system show warnings virus bank application advise remove	Negative	1	1	0
Google Play Store	5c0e0c7b-861d-410b-9339-e78966904fe4	The latest update shows a virus warning from the security program, and the application has been deleted.	Last trip	##########			5	en	us		1	ar	late update show virus warn security program application delete	Negative	0	1	0
Google Play Store	4c7b4443-45b8-4c38-8a40-2ce13290bf7b	The last time I talked to him, he said that there was a virus on my phone and I deleted it.	Mujtaba Almutawa	##########			5	en	us		1	ar	last time talk say virus phone delete	Negative	0	1	0
Google Play Store	a230127b-7eb3-421f-bf00-96243992da29	The latest update carries a malware virus.	mohammed sal	##########			4	en	us		1	ar	late update carry malware virus	Negative	0	1	0
Google Play Store	65ad5894-932e-4bf1-a05e-86c0e50555ba	The application needs to be completely reprogrammed, it works very slowly within Saudi Arabia despite having fast internet fiber. So, imagine how it would be while traveling when the internet is usually slow. The application becomes even worse.	Ali Almulla	##########			4	en	us		1	ar	application need completely reprogrammed work slowly within saudi arabia despite fast internet fiber imagine would travel internet usually slow application become even bad	Negative	1	1	1
Google Play Store	9bd52d13-2fd4-4c20-baf5-3fcef2325b25	The application is very bad.	إسلاميات	##########			1	en	us		1	ar	application bad	Negative	1	0	0
Google Play Store	6b77b5a2-4ca2-450a-a4f4-2a9abdb099b8	The latest update says that there are viruses/trojans.	Haitham Alrayes	##########			4	en	us		1	ar	late update say virusestrojans	Neutral	1	1	0
Google Play Store	54a1347c-0819-49c6-a297-24f1ea378dd1	Types of comments are very bad.	Ibrahim Al-Bassam	##########			1	en	us		1	ar	type comment bad	Negative	1	0	0
Google Play Store	9e54c781-9c0b-4e42-b5c9-bca8448c1992	It's very bad, hanging on length.	Host Yousef	##########			3	en	us		1	ar	bad hang length	Negative	1	0	1
Google Play Store	f503c6d8-8599-49f3-83a2-f1be331c40f9	I have good news for you, they added a very cool feature to the app. It crashes if you try to add credit using a Visa or travel card! Amazing, right? Before that, get yourself a cup of tea, relax, and sing "Oh night, don't prolong."	FaS Kam	##########			3	en	us		1	ar	good news add cool feature app crash try add credit use visa travel card amaze right get cup tea relax sing oh night dont prolong	Positive	1	1	0
Google Play Store	9a33d6b9-6c29-4c32-b7ab-32aa18e66192	"Oh my god, this comparison application is terrible compared to the Alinma application. Every time I try to log in, it tells me there is an error but doesn't give any specific details, and I have no idea what to do or where to go."	ابوالعدّي - Artorias	##########			2	en	us		1	ar	oh god comparison application terrible compare alinma application every time try log tell error doesnt give specific detail idea go	Negative	1	1	0
Google Play Store	d2ecb3dd-467b-460a-8ad9-7ef19f1a5992	It hangs a lot.	talal	##########			2	en	us		1	ar	hang lot	Neutral	0	0	1
Google Play Store	55fe5fe5-e0d4-4b42-9379-31a382f7ad1b	The application does not work on the passport page and when selecting the currency, it freezes.	Osama Saleh	##########			2	en	us		2	ar	application work passport page select currency freeze	Negative	0	1	1
Google Play Store	f8357c71-b1b9-4d4e-922a-dc10bf8e047d	Are you sure this is a banking application? Thank God, my salary is not with you 😂	Bandar KH	##########			2	en	us		2	ar	sure bank application thank god salary	Negative	0	0	0
Google Play Store	ca70b558-ddb7-42c1-88aa-a966c02a282c	The application is slow, it freezes a lot, and it needs an urgent update.	AQEEL ALAWADH	##########			3	en	us		1	ar	application slow freeze lot need urgent update	Negative	0	0	1
Google Play Store	5414dd20-e286-4343-9033-84bdebdd58f0	The application is good, but it needs updating and development. It always freezes and doesn't respond to anything.	HUSSAIN ALSALAT	##########			1	en	us		4	ar	application good need update development always freeze doesnt respond anything	Negative	1	1	1
Google Play Store	404d19ff-aa5a-4cc6-813c-f5e20c5d357e	Very very bad.. It's slow and always hangs.	Mohammed J.	##########			2	en	us		2	ar	bad slow always hang	Negative	1	0	1
Google Play Store	69512d02-f907-4379-a560-078cffc8d2ed	Latest update on the issues	Don Asmarika	##########			3	en	us		1	ar	late update issue	Neutral	0	1	0
Google Play Store	561add10-339c-4658-affd-c7b3d72bcefe	For over two weeks, the application problem persists when accessing it, as it freezes and displays errors in addition to its heaviness and lack of smoothness.	Lafi Alkhudaidi	##########			2	en	us		1	ar	two weeks application problem persist access freeze display errors addition heaviness lack smoothness	Negative	1	1	1
Google Play Store	ec40bf8e-756e-45d7-b5d8-dd354cc848b0	Currency conversion on the travel card crashes and the application shuts down.	ALI ALRASHEED	##########			1	en	us		1	ar	currency conversion travel card crash application shut	Negative	0	1	1
Google Play Store	bd64367a-994c-4fb2-9574-5a3d23c715cc	Very bad, too clingy.	Abdulaziz J	##########			1	en	us		1	ar	bad clingy	Negative	1	0	0
Google Play Store	f26d8a34-05a9-46b2-80dd-ab4d52d46198	the worst application that constantly hangs.	Abdulmajeed Saad	##########			1	en	us		1	ar	bad application constantly hang	Negative	1	0	1
Google Play Store	ca306d6e-368d-44d0-a0d1-30e4ad7246f9	The worst banking application in the world, and it frequently crashes when used.	Abdulaziz Alqudaihi	##########			1	en	us		1	ar	bad bank application world frequently crash use	Negative	1	1	1
Google Play Store	15363ce3-36d1-406e-8aff-7499213d8768	The latest update destroyed the program and it kept freezing. I couldn't convert or pay.	Madara 411	##########			1	en	us		2	ar	late update destroy program keep freeze couldnt convert pay	Negative	0	1	1
Google Play Store	71549e22-4a0d-4b65-bd1e-c320d9bf689f	The application is very bad and does not work.	Ahmed Al Kabawi	##########			1	en	us		1	ar	application bad work	Negative	1	1	0
Google Play Store	17a7ebc1-4062-49d0-bff7-ebe102cb2c9e	"He/She hangs a lot."	Saeed Alzahrani	##########			2	en	us		1	ar	heshe hang lot	Neutral	0	0	1
Google Play Store	1f1dbab7-bd4a-4fcb-abe2-0bacc7108efc	The worst application among the banks, it lags, and is weak in its response, and difficult to navigate between options.	mohammed ALANAZI	##########			2	en	us		1	ar	bad application among bank lag weak response difficult navigate options	Negative	1	0	0
Google Play Store	6db511ee-2afa-4a00-a2c1-aebfe689a458	the worst application that keeps stopping every now and then.	Mohamed Hassan	##########			2	en	us		1	ar	bad application keep stop every	Negative	1	1	0
Google Play Store	96945e4b-f19a-4519-b1fb-5b7daf544e4f	The worst banking application, frequent glitches, sudden shutdowns, and errors that do not allow it to compete with any other local bank. It has been in the same state for years with no interface updates or solutions to the problems.	MM	##########			2	en	us		1	ar	bad bank application frequent glitches sudden shutdowns errors allow compete local bank state years interface update solutions problems	Negative	1	1	1
Google Play Store	9141f1a4-5c0a-4ae3-91be-859a82595f18	The bad application is garbage, it keeps freezing.	w al-otaibi	##########			2	en	us		1	ar	bad application garbage keep freeze	Negative	1	0	1
Google Play Store	b98184ee-7b71-466b-a6d4-416f7341e4d6	The program has become frequently freezing and tedious to use, despite repeated attempts and using different devices. The problem still exists and has appeared recently.	أبو محمد	##########			2	en	us		1	ar	program become frequently freeze tedious use despite repeat attempt use different devices problem still exist appear recently	Negative	0	1	1
Google Play Store	7fcf5fd5-fa46-4d11-af07-ef46a0d85076	Unfortunately, the application is unstable and freezes. It is bad and causes a lot of embarrassment, especially when logging in and performing some operations. We hope you enhance your electronic services. Best regards, Ahmad Al-Hamoud.	Ahmed Alhumoud	##########			2	en	us		1	ar	unfortunately application unstable freeze bad cause lot embarrassment especially log perform operations hope enhance electronic service best regard ahmad alhamoud	Negative	1	0	1
Google Play Store	2016f07e-5e42-478c-bc0e-29f3f01026a9	"Constantly experiencing technical issues and downtime. It disrupts your work."	Mu.	##########			2	en	us		2	ar	constantly experience technical issue downtime disrupt work	Negative	0	1	0
Google Play Store	420f08ab-2d91-47cf-a150-288d495d4341	The worst banking app I've ever seen. It crashes frequently and has constant maintenance issues. The bank is backward.	Abdullah Abdulaziz	##########			2	en	us		1	ar	bad bank app ive ever see crash frequently constant maintenance issue bank backward	Negative	1	1	0
Google Play Store	0578932c-9e08-4ea9-83f5-2f86f4eb418b	The neighborhood grocery app has fewer crashes than your esteemed app.	Osama	##########			2	en	us		1	ar	neighborhood grocery app few crash esteem app	Positive	1	1	0
Google Play Store	9b4e390a-2817-4aa4-802f-6a8e6d0d61ff	Garbage collector is stuck on the login prompt.	عبدالمجيد العنزي	##########			2	en	us		1	ar	garbage collector stick login prompt	Negative	0	1	1
Google Play Store	bd6f1edb-0892-4a4d-848f-ceab7a9bd661	The application does not work if I want to transfer money to Visa.	Nasser Almulhim	##########			2	en	us		1	ar	application work want transfer money visa	Negative	0	1	0
Google Play Store	b33ed02c-c420-4e52-92c7-3ebdb3919273	"The worst banking application you can experience in your life. This application is basically a browser page transferred to the app. It is plagued with all kinds of errors, constant logouts, and repeated login attempts until you finally succeed. It tortured me when I needed to transfer funds from my current account to my travel card while traveling outside the kingdom."	Abdullah Al-Sulaiman	##########			4	en	us		1	ar	bad bank application experience life application basically browser page transfer app plague kinds errors constant logouts repeat login attempt finally succeed torture need transfer fund current account travel card travel outside kingdom	Negative	1	1	0
Google Play Store	23cfad9e-2a3d-42a2-923a-14df4a557267	Heavy and burdensome, brings sickness and pain.	Rami Alhojori	##########			2	en	us		1	ar	heavy burdensome bring sickness pain	Negative	1	0	1
Google Play Store	dd323955-e2e9-477f-a35c-290228596e1c	It is really frustrating, one of the worst banking programs. It opens once with you and then doesn't open 10 times after that.	Ibrahim bukhari	##########			6	en	us		1	ar	really frustrate one bad bank program open doesnt open time	Negative	1	1	0
Google Play Store	3a96dfd6-3830-437f-b941-d776e02b3259	The application is always lagging and is very boring.	Abdullah Khalid	##########			2	en	us		1	ar	application always lag bore	Negative	1	0	1
Google Play Store	fc3d4b07-06d3-4fc4-9359-e643123e2336	Very bad application, it has a lot of comments and takes a long time to log in. Additionally, if you manage to log in, it takes an hour to reach the desired comment. On top of all that, it is very ugly.	abdulaziz AL-khteeb	##########			2	en	us		1	ar	bad application lot comment take long time log additionally manage log take hour reach desire comment top ugly	Negative	1	0	1
Google Play Store	156af945-c48d-4f4b-9667-554cfedfa77b	An application that raises blood pressure and does not reduce the balance after withdrawal operations, how much does it keep the same number as if nothing was withdrawn.	Na na	##########			2	en	us		1	ar	application raise blood pressure reduce balance withdrawal operations much keep number nothing withdraw	Negative	1	0	0
Google Play Store	bcff2a64-c846-448a-b676-2c2306b84a03	A disgusting and boring application.	HUSSAIN ALHARTHI	##########			2	en	us		1	ar	disgust bore application	Negative	1	0	0
Google Play Store	e55b04a0-1716-4122-9550-6494ee9f0bef	Provocative application	marwan althobaiti	##########			1	en	us		1	ar	provocative application	Neutral	1	0	0
Google Play Store	506ef553-46bf-4082-a1c8-9d5b116021a2	The application has become stupid and failed.	F.H.D》 314	##########			1	en	us		1	ar	application become stupid fail	Negative	1	1	0
Google Play Store	8f649ec5-d892-4445-b932-3da20c2b9b6a	Very bad, with every update it becomes slow and lags even more.	A&R Family	##########			1	en	us		1	ar	bad every update become slow lag even	Negative	1	0	1
Google Play Store	1ab9cd9e-eadc-46cf-a1f4-be0de60c8196	Why is the application not being updated? It needs a lot of attention.	Turki Haddadi	##########			0	ar	us		1	ar	application update need lot attention	Negative	1	0	0
Google Play Store	a70bb18f-bc3a-499a-85e7-e50526b00c39	The application does not work on Huawei devices.	حسن عسيري	##########			0	ar	us		1	ar	application work huawei devices	Negative	0	1	0
Google Play Store	d7581e39-df6f-4350-83fc-134f824d5f98	Many breakdowns and mistakes.	Mr W2	##########			0	ar	us		2	ar	many breakdowns mistake	Negative	0	1	0
Google Play Store	114157b2-361f-4894-b896-a7e6573456bd	The application always opens.	Hussain Jassem	##########			0	ar	us		2	ar	application always open	Neutral	0	1	0
Google Play Store	a45169b1-f0c8-4e56-abef-882934d943a3	The application is very bad, every time I enter it, it kicks me out immediately. It doesn't allow me to enter the password, it just tells you to delete it and download it again. Same problem keeps happening. I'm frustrated with it.	نجاة الزهراني	##########			0	ar	us		1	ar	application bad every time enter kick immediately doesnt allow enter password tell delete download problem keep happen im frustrate	Negative	1	1	0
Google Play Store	5d906c7f-c344-41e9-b0bd-0966584d9a79	Unfortunately, the ATM card is very bad. It is very difficult to renew it through the mada system. The self-service website is always frozen and the self-service is suspended. Is there no internet connection?	العامري اللحياني	##########			0	ar	us		1	ar	unfortunately atm card bad difficult renew mada system selfservice website always freeze selfservice suspend internet connection	Negative	1	1	1
Google Play Store	2849be65-5413-4de3-a152-8ccf5aad776d	Good.	Abdalla Yasser /عبدالله ياسر	##########			0	ar	us		5	ar	good	Positive	0	0	0
Google Play Store	18c5b611-1e18-4295-b7ef-86aba3e4a07a	Why is your banking app so bad? I use Al Ahli and Al Rajhi apps daily and never faced frustrating issues. However, with your app, every time I use it, I struggle to the point where I no longer trust it when traveling.	عبدالله الحبيب	##########			0	ar	us		1	ar	bank app bad use al ahli al rajhi apps daily never face frustrate issue however app every time use struggle point long trust travel	Negative	1	0	0
Google Play Store	fed0a3fd-8321-4b0e-a4d6-30f2432ef04f	It is very bad and it hangs and doesn't work.	YAS	##########			0	ar	us		1	ar	bad hang doesnt work	Negative	1	1	1
Google Play Store	ecad9ab7-a7ba-429f-acf4-6906ce63ab09	The application freezes often and takes a long time to open.	Rana *	##########			0	ar	us		1	ar	application freeze often take long time open	Negative	0	0	1
Google Play Store	6834a342-8b29-4578-8913-9d388fc9c825	Very bad. For over a year, whenever I try to access, it gives me a message ("Sorry, incorrect authorization code entered"). I have contacted the bank through messages, calls, and visits, but unfortunately, the situation remains the same.	Issa Alissa	##########			0	ar	us		1	ar	bad year whenever try access give message sorry incorrect authorization code enter contact bank message call visit unfortunately situation remain	Negative	1	1	0
Google Play Store	87cee328-a704-40b7-b28d-1becb734b44b	The application does not meet the level of customer satisfaction, it is slow and does not open. It is very poor, and I am considering changing the bank.	محمد هزازي	##########			0	ar	us		1	ar	application meet level customer satisfaction slow open poor consider change bank	Negative	1	0	1
Google Play Store	2518c8bc-6882-40d9-9397-f7f4f3542f69	The application is slow, I hope it can be improved. Thank you.	Khalid Ali	##########			0	ar	us		1	ar	application slow hope improve thank	Negative	1	0	1
Google Play Store	75d15510-e1df-4ad0-9ff1-09932034f49a	Patient application	Othman Alzhrani	##########			0	ar	us		1	ar	patient application	Neutral	1	1	0
Google Play Store	3fc95921-59c1-4924-ba7e-173365af2067	Support	رجب الجهني	##########			0	ar	us		5	ar	support	Neutral	0	1	0
Google Play Store	819af51f-48cb-46c0-ae97-abb80d4ba7e8	"The application is excellent and the banking services are excellent, but there are no branches of the bank in some cities, and it is supposed to be available in all cities of the kingdom."	محمد المالكي	##########			0	ar	us		5	ar	application excellent bank service excellent branch bank cities suppose available cities kingdom	Positive	0	0	0
Google Play Store	bc2bb6ae-e870-4a2b-9614-33fc7011a071	The electronic services are very, very, very bad.	خالد الزهراني	##########			0	ar	us		1	ar	electronic service bad	Negative	1	0	0
Google Play Store	3e7de8fc-8b9d-435d-824f-d116e25d3cb5	A very, very prestigious bank.	اسير الليل	##########			0	ar	us		5	ar	prestigious bank	Positive	0	0	0
Google Play Store	d2163c4e-2c5c-474a-9f32-ce4b02e2fd8b	The application is not understandable and lacks a lot of development. There is no sense of investment bank or conscience. Improve the application 😭	سعود ال ملفي	##########			0	ar	us		1	ar	application understandable lack lot development sense investment bank conscience improve application	Negative	1	0	0
Google Play Store	6b54c6ea-e737-4553-858d-d15f17df5286	The application used to be excellent, but unfortunately it now hangs and does not login quickly. Also, there are daily operations that prevent me from making transfers.	Rafal Tariq	##########			0	ar	us		1	ar	application use excellent unfortunately hang login quickly also daily operations prevent make transfer	Negative	1	1	1
Google Play Store	193b94cc-6cd4-4705-905b-403cf79bff28	Bad	S.A Al_Otibi	##########			0	ar	us		1	ar	bad	Neutral	1	0	0
Google Play Store	cad9d89a-38c4-465f-ba4b-df1aef5c2b03	The application has improved a lot since the beginning! However, it does not keep up with other banking applications. It needs more improvement, speed, and more banking services to be introduced, such as quick access features like fingerprint login. It also lacks the option to save a record of preferred transfers instead of entering them every time, and so on.	Nawaf ALNEFAIE	##########			5	ar	us		3	ar	application improve lot since begin however keep bank applications need improvement speed bank service introduce quick access feature like fingerprint login also lack option save record prefer transfer instead enter every time	Negative	1	1	0
Google Play Store	1c09c4a4-d887-4b9e-a6e1-52b1f2486329	The worst bank, all services are processed after 48 hours. I issued a travel card, traveled and came back without using it. You can't open the application outside of Saudi Arabia, and you can't let anyone else access it because it requires 48 hours to authenticate the new device.	HADOOOI123	##########			0	ar	us		1	ar	bad bank service process hours issue travel card travel come back without use cant open application outside saudi arabia cant let anyone else access require hours authenticate new device	Negative	1	1	0
Google Play Store	2ebafa90-1c56-412e-995f-d9f0dfbc080c	2023 Please fix the application.	RiY8 َ	##########			0	ar	us		3	ar	please fix application	Negative	0	1	0
Google Play Store	477540d7-1434-4d03-9047-ee5f4061165e	The program closes suddenly.	Ahmad Alsultan	##########			0	ar	us		1	ar	program close suddenly	Neutral	0	1	0
Google Play Store	eba712b3-a577-4951-98a9-af91dfb32d52	Since the day I downloaded the application, it has not been opening for me and it says there is an error. Please try again later.	محمد الحربي	##########			0	ar	us		1	ar	since day download application open say error please try late	Negative	0	1	0
Google Play Store	c8cd1231-0045-4c92-8416-6841a5828bba	Very bad	ابوالبراء	##########			0	ar	us		1	ar	bad	Negative	1	0	0
Google Play Store	9b1433f9-7b99-44d2-854e-f037c67a02a5	He was working now, verification messages for login are not being received.	Oruob zh	##########			0	ar	us		1	ar	work verification message login receive	Neutral	0	1	0
Google Play Store	667d2e61-6b6e-4415-85db-fbad98403c4b	It does not work.	Ali Marri	##########			0	ar	us		1	ar	work	Negative	0	1	0
Google Play Store	5b85a033-e42a-4916-9cc3-e2b52dcad8a1	The application is very bad, it doesn't open, and it keeps crashing all the time.	مأتم الحاج أحمد منصور الخميس حلة محيش	##########			0	ar	us		1	ar	application bad doesnt open keep crash time	Negative	1	1	1
Google Play Store	2bfaa859-25f6-40d1-b0d3-2bdbc0150c09	His problem is that he sometimes chokes and can't breathe.	مجرد رأي	##########			0	ar	us		1	ar	problem sometimes choke cant breathe	Negative	1	1	0
Google Play Store	c9227246-feeb-4b48-a806-5af65ae5e0d3	The worst bank application on Earth, I don't know if the bank has developers for the application or what!	Faisal Alh	##########			0	ar	us		1	ar	bad bank application earth dont know bank developers application	Negative	1	0	0
Google Play Store	75e3e9e5-70e2-496a-9f4d-8b7173bde7ad	The application is very bad since a month and it is impossible to log in. We hope that the situation will be addressed.	عيد مشهور الغيثي	##########			0	ar	us		1	ar	application bad since month impossible log hope situation address	Negative	1	1	0
Google Play Store	3550ade9-a417-4825-922b-65f01f2ad3d6	The application has not been working for a long time, please address the problem as soon as possible.	Um Abdullah	##########			0	ar	us		1	ar	application work long time please address problem soon possible	Negative	0	1	0
Google Play Store	8cf935c5-d3df-4c68-a8b3-cafdebb53392	Usually bad, I always enter the application that the application maker is in, but it doesn't happen and develop it, it deserves a lot of stars, I come across it a lot, oh my, it's really terrible.	Faisal Harbi	2023-08-03 04:06:00			0	ar	us		1	ar	usually bad always enter application application maker doesnt happen develop deserve lot star come across lot oh really terrible	Negative	1	1	0
Google Play Store	74d753d6-c4fc-420b-9b4c-8cd83a0737fe	The application is very bad.	albataar S	##########			0	ar	us		1	ar	application bad	Negative	1	0	0
Google Play Store	4f7a76f8-a933-4adf-b10a-32571c29724b	The application is very heavy and it hangs a lot.	ibrahim almaiman	##########			0	ar	us		1	ar	application heavy hang lot	Negative	0	0	1
Google Play Store	80ced506-a45f-4a60-beca-9fa1c4af59f6	Unfortunately, for years it has not been developed and its operation is very, very bad.	wail alaqeel	##########			0	ar	us		1	ar	unfortunately years develop operation bad	Negative	1	0	0
Google Play Store	b1b043f1-ed5b-49b1-9a39-36759a3cd20b	The application is very bad and does not work. The program is not developed and seems primitive.	‪Master “Xselverado” Xx‬‏	##########			0	ar	us		1	ar	application bad work program develop seem primitive	Negative	1	1	0
Google Play Store	7c884432-31f2-4d31-ad33-54d42d88c39c	What doesn't work is that I have been calling customer service for a month and there is a complaint number, but it is useless.	امل إبراهيم	##########			0	ar	us		1	ar	doesnt work call customer service month complaint number useless	Negative	1	1	0
Google Play Store	f5f791d7-a209-4113-be1b-3568f5b419aa	All banks have developed their applications, except you. There is no fingerprint login feature and the services are primitive. Even the names of the services do not have explanations. The login error message appears repeatedly, which frustrated me until I had to use a currency card. Thank God, there are alternatives for those who do not develop themselves. This will be a respected disaster in tra…	عبد الله ابراهيم	##########			10	ar	us		1	ar	bank develop applications except fingerprint login feature service primitive even name service explanations login error message appear repeatedly frustrate use currency card thank god alternatives develop respect disaster travel time	Negative	1	1	0
Google Play Store	dfa3862f-e092-41d4-941b-8b00a0b235a5	Very bad, no services and no customer care.	Fahad ALdekhail	##########			0	ar	us		1	ar	bad service customer care	Negative	1	0	0
Google Play Store	c1b2918b-77b5-4b48-9e77-86b444e1496a	The "Zee Al-Zaft" application is complicated and raises stress levels. The amount of stupidity in it is abnormal. If you want to unravel your pants, the bank will call you. May Allah prolong the life of Al-Rajhi Bank. We will get by without it and throw it in the trash can. God's blessings are not upon this application.	غانم الشهراني	##########			0	ar	us		1	ar	zee alzaft application complicate raise stress level amount stupidity abnormal want unravel pant bank call may allah prolong life alrajhi bank get without throw trash gods blessings upon application	Negative	1	0	0
Google Play Store	ed64d071-b56a-48c9-8120-d6928b1ba738	The worst application among all applications, not just competing banking applications. When compared to other banks, you feel like you are living in the Stone Age while others are in a world thousands of light-years away from you. In conclusion, even one star is too much for it.	єνil ً	##########			13	ar	us		1	ar	bad application among applications compete bank applications compare bank feel like live stone age others world thousands lightyears away conclusion even one star much	Negative	1	0	0
Google Play Store	35bca5e4-0a98-4d79-b9e9-267d0c4f6479	The application does not open when connecting to a bad Wi-Fi connection.	PRECO QH	##########			0	ar	us		1	ar	application open connect bad wifi connection	Negative	1	1	0
Google Play Store	d587aaf4-fb9d-4adc-9806-e35cbc4aa273	Difficult to use.	عبدالله العتيبي	##########			0	ar	us		5	ar	difficult use	Negative	1	0	0
Google Play Store	df4020ec-ecc7-42e5-93db-5fc2fb73b024	fasFFsaf	Khalid Albluwi	##########			0	ar	us		1	ar	fasffsaf	Neutral	0	0	0
Google Play Store	2dbdc8dc-b346-471c-b074-878887914c81	The application is very bad on the Android system and the bank management is not interested in it at all.	Majed As	##########			1	ar	us		1	ar	application bad android system bank management interest	Negative	1	0	0
Google Play Store	5a04e086-6a26-46d3-8827-974c63ba639a	It doesn't work.	إبراهيم المحيميد	##########			0	ar	us		1	ar	doesnt work	Negative	0	1	0
Google Play Store	b988550a-bc93-49bc-ad41-ec0a2689168c	Worst bank.	Alin Bhujaili	##########			0	ar	us		1	ar	bad bank	Negative	1	0	0
Google Play Store	1b3295be-1f29-4056-98ee-86cf6ac8a139	He sometimes connects successfully, and sometimes he doesn't. Sometimes I am forced to perform a certain action and the password is not accepted. After that, he accepts the same password again.	Sara Alsubaie	##########			0	ar	us		1	ar	sometimes connect successfully sometimes doesnt sometimes force perform certain action password accept accept password	Neutral	0	1	0
Google Play Store	75eb1d7c-f7d6-454d-a38a-9055d5fdbd07	Fail application	Turki Abdo	##########			0	ar	us		1	ar	fail application	Negative	0	1	0
Google Play Store	3d59470c-ac6e-4303-8448-2df631d20afa	Very tired	علي الكعيبي	##########			0	ar	us		1	ar	tire	Negative	1	0	0
Google Play Store	391b1f31-0742-4a79-b31e-2575bf4314a5	The application is not working.	azez fhd	##########			0	ar	us		1	ar	application work	Negative	0	1	0
Google Play Store	5736ce81-5079-432b-b8dc-3f067ae0c69b	The application has been not opening for me for 4 days.	ا اا	##########			0	ar	us		1	ar	application open days	Negative	0	1	0
Google Play Store	b8565e8a-4ccb-4992-a7ae-332284eef94a	The application is bad, you must delete it and reinstall it for it to work, and after a while you have to do the same thing. Of course, it has been like this for over a year, we have filed complaints, but no response.	Salman	##########			0	ar	us		1	ar	application bad must delete reinstall work thing course like year file complaints response	Negative	1	1	0
Google Play Store	1ba423b9-0b09-4938-aca9-9067ec24ed48	The application is not working and has been suddenly stopped. Despite repeated attempts to contact and numerous complaints, the employee claims that there are no issues with the electronic services. Well, where is the problem then? He says it's a device issue. Seriously, is that a solution? Why did it stop? He says it's due to an update. Apparently, the update has caused some clients' application…	راشد العنزي	##########			8	ar	us		1	ar	application work suddenly stop despite repeat attempt contact numerous complaints employee claim issue electronic service well problem say device issue seriously solution stop say due update apparently update cause clients applications stop work strange program work google mobile phone mean account vulnerable theft bank tell open google well application work want solution open google solution swe…	Negative	0	1	0
Google Play Store	184cca61-7e3b-4c1e-914b-cf7deda88ee2	The program does not open.	ابو معاذ	##########			0	ar	us		1	ar	program open	Neutral	0	1	0
Google Play Store	16583894-d45b-48e2-87b1-2c16c67554d9	One of the worst banking applications.	Talal Sultan	##########			0	ar	us		1	ar	one bad bank applications	Negative	1	0	0
Google Play Store	e9f0ecdf-e3ec-4a6e-bf0d-b994137f057a	The application is bad, it keeps crashing and you can't login to your account. You keep trying later.	KΉΛᄂΣD ΛᄂI	##########			0	ar	us		1	ar	application bad keep crash cant login account keep try late	Negative	1	1	1
Google Play Store	6b551b71-0661-4b19-994b-dab3cc357d9d	The application is not smooth during use.	Ksa	##########			0	ar	us		2	ar	application smooth use	Negative	0	0	0
Google Play Store	36f495a8-143e-42aa-966f-c2ed1eca3339	- The application has stopped working, and the bank insists that it is functioning to avoid complaints!!!!! - The investment bank used to be outstanding, but it has become the worst bank for the past two years, not caring about customer complaints. - The application hasn't seen any updates or development for years, and now it doesn't work!! - Many banks make noticeable improvements every month, e…	متفائل دوما	##########			1	ar	us		1	ar	application stop work bank insist function avoid complaints investment bank use outstanding become bad bank past two years care customer complaints application hasnt see update development years doesnt work many bank make noticeable improvements every month except investment bank deep slumber years bad board directors monitor bank performance solution withdraw money bank respect customer opinions…	Negative	1	1	0
Google Play Store	fc16dfdd-35c5-448e-9f17-a73cd3eab017	The application is not working, the same problem as the brothers who commented before me. Where is the investment bank?	abu azam	##########			0	ar	us		1	ar	application work problem brothers comment investment bank	Negative	0	1	0
Google Play Store	a456bf0a-ce98-4507-9a41-3074dd2803aa	A bad application. I do not recommend using it.	Mohammad Mustafa	##########			0	ar	us		1	ar	bad application recommend use	Negative	1	0	0
Google Play Store	eb3e6c9a-fe20-4d24-85c6-8da76833eb49	The application is freezing and not opening.	عبيد الزهراني	##########			0	ar	us		1	ar	application freeze open	Negative	0	1	1
Google Play Store	33ab2b39-9ad8-4089-b334-1efe860475b8	A heavy application that does not live up to a banking application.	Abdulrahman S S	##########			0	ar	us		1	ar	heavy application live bank application	Negative	0	0	1
Google Play Store	0548435f-a4bc-449e-82b9-a738f8549693	Very bad, it's always stuck.	Ahmad Alansari	##########			0	ar	us		1	ar	bad always stick	Negative	1	0	1
Google Play Store	53d0208f-8cc3-4e6a-8d6b-3f411eb02440	The bank app always fails and crashes. It has several issues and a technician comes to work on the bank's servers.	Talal Almalki	##########			0	ar	us		1	ar	bank app always fail crash several issue technician come work bank servers	Negative	0	1	0
Google Play Store	eb7f8acb-ac31-4e08-aef9-ff918f5a4ba1	The application has become bad, it suddenly disappears upon launch.	F B H	2023-07-03 06:44:00			0	ar	us		1	ar	application become bad suddenly disappear upon launch	Negative	1	1	0
Google Play Store	fd97aadb-d156-4aee-a53c-9d10091a3949	I am traveling and the application is freezing, and I forgot the password for my travel card. There is no option in the application to change the password. The app's rating is one star, and I hope to resolve these issues. When I submit a complaint through the application, I can't even change the password for the travel card. The application doesn't even open, it just shows a message to contact th…	H	2023-07-03 00:15:00			1	ar	us		1	ar	travel application freeze forget password travel card option application change password apps rat one star hope resolve issue submit complaint application cant even change password travel card application doesnt even open show message contact bank travel bank amount date date b country c satisfactory term customer service contact bank respond	Negative	0	1	1
Google Play Store	7e089c7d-1998-44ae-b225-12b011bbeec0	Bad and slow	A Abo Faris	##########			0	ar	us		1	ar	bad slow	Negative	1	0	1
Google Play Store	bee20442-0649-4fe4-9639-46ef3411e372	It was excellent, but now it doesn't open with me.	ALXANDRR	##########			0	ar	us		1	ar	excellent doesnt open	Negative	1	1	0
Google Play Store	17c33d10-72b8-489b-9d2e-3ecd78c19eea	I cannot log into the program. An error appears. Please try again later. The issue has been going on for two weeks.	Khalid Alsaif	##########			0	ar	us		1	ar	log program error appear please try late issue go two weeks	Negative	0	1	0
Google Play Store	41ebc804-1f72-4fc1-a86b-99f55bdf54c7	By Allah, it is the worst application not only in banks but in all applications, a sick application.	Adnan Makhashen	##########			0	ar	us		1	ar	allah bad application bank applications sick application	Negative	1	0	0
Google Play Store	ebefc1ab-4734-4dd0-8701-4cef07b49b4a	The preferred and distinguished bank...	ghormallah alghamdi	##########			0	ar	us		5	ar	prefer distinguish bank	Neutral	1	0	0
Google Play Store	79c91762-375b-4099-92d1-65e7d64a0e85	It is very bad, it does not open for me.	رحيق العسل	##########			0	ar	us		1	ar	bad open	Negative	1	1	0
Google Play Store	7667cae2-9e4a-42d0-9278-04d846b5e29c	The new version requires access to the geographic location. Delete and download again, allow access to the geographic location, and the application will open.	Royal Man	##########			2	ar	us		5	ar	new version require access geographic location delete download allow access geographic location application open	Neutral	0	1	0
Google Play Store	e1bc2066-e079-4530-af2d-f67ab40faf92	I have been trying to log in for over a week and have been unsuccessful. The customer service has only responded with "Make sure your internet connection is working and update the application." The application is bad and the technical support is even worse.	حسن العلياني	##########			7	ar	us		1	ar	try log week unsuccessful customer service respond make sure internet connection work update application application bad technical support even bad	Negative	1	1	0
Google Play Store	e1e3f11b-e634-4581-9057-e2d928f8c277	The application is bad.	motab shlan	##########			0	ar	us		1	ar	application bad	Negative	1	0	0
Google Play Store	95505d94-221f-4561-8b10-0f7b1e8b76c0	There is a problem with the application. It hasn't been opening on many devices for a year, and the problem hasn't been resolved.	abu rawad	##########			1	ar	us		1	ar	problem application hasnt open many devices year problem hasnt resolve	Negative	0	1	0
Google Play Store	fd7c69c9-38d2-4341-90fd-1a0f0bcc2706	the worst application that takes an hour to accept your input before you can enter your username.	faisal a	##########			1	ar	us		1	ar	bad application take hour accept input enter username	Negative	1	0	1
Google Play Store	baf295e4-5e74-4d0b-a12a-27301c2a24d6	The application is terrible outside the kingdom, it crashes as soon as I receive slow responses from the bank, negligence that cannot be described.	Issam altalla	##########			0	ar	us		1	ar	application terrible outside kingdom crash soon receive slow responses bank negligence describe	Negative	1	1	1
Google Play Store	14cee506-b9d3-40d0-9b18-9bf44476508e	Very bad and unprofessional, and in the near future, the transfer will be made to another bank.	MOHAMMED SALMAN	##########			0	ar	us		1	ar	bad unprofessional near future transfer make another bank	Negative	1	0	0
Google Play Store	65a44133-d793-46d1-b804-362150cf9697	I closed my account at Blue Sheik Bank because it was the worst and it seems I came to see something worse than it 😂	Abu Adam Abushaar	##########			0	ar	us		1	ar	close account blue sheik bank bad seem come see something bad	Negative	1	0	0
Google Play Store	d2ab2b91-d3de-451a-920f-9e86ce0d29bf	Unfortunately, the application has not been working for a long time, and it has not been fixed. There is no attention given to it.	Abbas Alsaihati	##########			38	ar	us		1	ar	unfortunately application work long time fix attention give	Negative	0	1	1
Google Play Store	5d498fca-61ec-405d-9fb9-82d7e927975b	You have a flaw, swear to God.	سليمان البليهد	##########			0	ar	us		1	ar	flaw swear god	Negative	1	0	0
Google Play Store	7536a815-943c-4d42-80da-bbf1c3ea0308	The application is very bad, it is not opening for me.	G M	##########			0	ar	us		1	ar	application bad open	Negative	1	1	0
Google Play Store	4d2fc3cd-2455-439c-99d8-dcc74b9cfa1c	The application crashes immediately.	مسفر ذيب	##########			0	ar	us		1	ar	application crash immediately	Negative	0	1	0
Google Play Store	8004691e-e973-405c-8864-f058bc7f8a9a	The colors of the application are bad and harmful to the eye, and it is very slow in implementing the services.	a alansary	##########			2	ar	us		1	ar	color application bad harmful eye slow implement service	Negative	1	0	1
Google Play Store	4c6632b0-5cd6-45e3-ace1-44bee3e566c4	There is a problem with the application, please solve it.	Ruqayah Al dhamen	##########			0	ar	us		1	ar	problem application please solve	Negative	0	1	0
Google Play Store	aa0ece24-cba2-41f6-b580-0fd7290801c0	The program used to be good, but now the quality is not good.	علي التميمي	##########			0	ar	us		1	ar	program use good quality good	Negative	0	0	0
Google Play Store	b52fd44b-e322-4d59-95df-f7d92093fd93	The application frequently hangs on Huawei devices. Please develop the application as soon as possible.	Adoola1428@gmail.com Adel	##########			0	ar	us		1	ar	application frequently hang huawei devices please develop application soon possible	Negative	0	1	1
Google Play Store	63e9a38a-c1ea-4d94-b2d3-b981da3fc60c	Thank you, thank you very much.	نصار السرواني	##########			0	ar	us		5	ar	thank thank much	Positive	0	0	0
Google Play Store	d3b703eb-9926-472d-ac3a-3dc2641eeccb	The application has become bad.. Every time I try to enter and type my username, it freezes and completely kicks me out of the application.. I have deleted it and reinstalled it, but the same problem persists.	shumin sunshine	##########			3	ar	us		2	ar	application become bad every time try enter type username freeze completely kick application delete reinstall problem persist	Negative	1	1	1
Google Play Store	fe93b8a0-9953-4857-9284-71422e49a6f5	The application is bad, it hangs and kicks me out of the application. Please solve the application's problem.	Moh Ibrahim	##########			0	ar	us		1	ar	application bad hang kick application please solve applications problem	Negative	1	0	1
Google Play Store	78220fef-e222-4978-8254-b4108d8bde54	the worst application, old version, slow and still unsuccessful.	عبدالله الوهيب	##########			0	ar	us		1	ar	bad application old version slow still unsuccessful	Negative	1	0	1
Google Play Store	604a432e-e842-4338-998a-1bc2601674d2	Very bad	أبو ليان أبو ليان	##########			0	ar	us		1	ar	bad	Negative	1	0	0
Google Play Store	bc59f9e8-47fc-4f25-9869-6dfdb28da050	The dumbest bank application in the world... It doesn't even know what type of device I have!!! The application says: "You have performed (jailbreak) - breaking the iPhone's security - and you will be prevented from using the application!!!!" Mind you, my device is a Galaxy S22 ULTRA. Breaking security for Android is called rooting. The problem is that my device does not have any security breache…	Hamed AL-Enazi	##########			2	ar	us		1	ar	dumb bank application world doesnt even know type device application say perform jailbreak break iphones security prevent use application mind device galaxy ultra break security android call root problem device security breach bank applications work even mada pay service information bank applications work device security breach detect specify whether jailbreak root bank application dumb doesnt ev…	Negative	1	1	0
Google Play Store	95aaf2c0-b7aa-49b6-9f41-65711f639df9	Application like garbage and the worst and procrastinating bank and I advise not to deal.	محمد الشهري	##########			0	ar	us		1	ar	application like garbage bad procrastinate bank advise deal	Negative	1	0	0
Google Play Store	f34d6a51-a759-4414-848c-0d4fdbe33065	Hey guys, the app is not working. Please find a solution for us, as it's causing us problems and inconveniences.	Faris Oyouni	##########			0	ar	us		1	ar	hey guy app work please find solution us cause us problems inconvenience	Negative	0	1	0
Google Play Store	390f46a0-19bd-4bea-911d-2a776fb822f6	If the application does not open for him, he should delete it and download it again. You will receive a notification to activate the geolocation. Choose only this time, then enter the application and it will open for you. A message to the developer of the program, by what right do you require us to activate the geolocation in order for us to be able to use the application? !!	wise 989	##########			8	ar	us		1	ar	application open delete download receive notification activate geolocation choose time enter application open message developer program right require us activate geolocation order us able use application	Neutral	0	1	0
Google Play Store	1c93dd3f-385b-4c6b-8d77-0fa0e3d83919	There is a problem with logging in. It hangs and says "try again." The issue could be with the funds, meaning I have to log in through Google.	حنان	##########			0	ar	us		1	ar	problem log hang say try issue could fund mean log google	Negative	0	1	0
Google Play Store	6f6eb943-638e-4565-9e73-cd16de8953be	"Every update is worse and worse, unfortunately. It's full of permanent malfunctions, delays, and unresponsiveness. It's a shame, considering it used to be much better in the past."	Sam S	##########			0	ar	us		1	ar	every update bad bad unfortunately full permanent malfunction delay unresponsiveness shame consider use much good past	Negative	1	0	1
Google Play Store	5a44cdfd-2d51-4b5f-9302-00dc99e114e2	Application that dominates the scene	naif	##########			0	ar	us		1	ar	application dominate scene	Neutral	1	0	0
Google Play Store	1748fe6d-eeba-4c40-be7a-5133c532d00b	The application is not working.	Basil Saeed	##########			0	ar	us		1	ar	application work	Negative	0	1	0
Google Play Store	219049cc-ee67-4e38-88ae-6fc5548e4c0f	Good.	MOHAMMED ALATAWI	##########			0	ar	us		5	ar	good	Positive	0	0	0
Google Play Store	18a3e75c-c616-4d00-a2c4-f9ec11900d7f	If the application is not opening, try giving the application permission to access the location. I tried that and it opened for me.	محمد القيسي	##########			0	ar	us		4	ar	application open try give application permission access location try open	Neutral	0	1	0
Google Play Store	585803f2-d783-4544-85da-2d974682bac0	Unfortunately, the bank's services have declined after 2015 and 2016. The online services have become very poor. I don't know if the bank's policies have changed or if the bank's general manager has changed. I don't know what its current situation is. For two weeks, I have been trying to access the application, but it keeps redirecting me to a page that says "Sorry, an unexpected technical error …	Ali alshehri	##########			0	ar	us		1	ar	unfortunately bank service decline online service become poor dont know bank policies change bank general manager change dont know current situation two weeks try access application keep redirect page say sorry unexpected technical error occur saudi investment bank end patience run many customers service bank much good force people turn saudi investment bank alienate world	Negative	1	1	0
Google Play Store	60276716-6236-4cc5-962a-4d6176c0c298	"The application is not working at all after your latest update... I don't know if you guys programmed it in a junkyard or with a plumber... People have entered the era of artificial intelligence and AI, and our banks are going in the opposite direction... I trust and rely on an ATM with a tin roof more than I trust our banks... I am currently terminating my relationship with this bank until it i…	Honor Z	##########			1	ar	us		1	ar	application work late update dont know guy program junkyard plumber people enter era artificial intelligence ai bank go opposite direction trust rely atm tin roof trust bank currently terminate relationship bank improve gain trust	Negative	1	1	0
Google Play Store	455faca2-2964-45c1-9f1d-0f51869f7d42	I am slow, backward, and have many problems. I used to be good, but there is no progress and all the banks have surpassed me by far.	Mo	##########			0	ar	us		1	ar	slow backward many problems use good progress bank surpass far	Negative	1	0	1
Google Play Store	d093ddff-62cb-4cbb-b81b-472f4fcf5dc5	It is bad that they do not provide personal financing when you are in another bank. 🤬	صلوا على النبي محمدصلى الله عليه وسلم 66	##########			0	ar	us		1	ar	bad provide personal finance another bank	Negative	1	0	0
Google Play Store	69e5b4f9-ab23-4d66-b34d-f9e8a921a96c	The application does not open and causes heat in the device.	Ali Saeed	##########			1	ar	us		1	ar	application open cause heat device	Negative	0	1	0
Google Play Store	2c15ba65-354e-4dce-8367-5f7d01a60cc8	Very annoying, it malfunctions a lot and is slow, causing delays and embarrassment in completing financial transactions.	Monther AlSalman	##########			0	ar	us		1	ar	annoy malfunction lot slow cause delay embarrassment complete financial transactions	Negative	1	1	1
Google Play Store	15ac1b8e-2257-4fcf-831c-80e8d9dff89c	The application is not working.	Nasser Alnasser	##########			0	ar	us		1	ar	application work	Negative	0	1	0
Google Play Store	216ea4ad-8f74-4f07-bc72-e8b707db0dac	"Very bad application that suits the services of this bank. It's been a whole week and I've been trying to open the application with no use. I think switching to another bank is the best and fastest solution."	زراعه نخيل تين فواكة	##########			0	ar	us		1	ar	bad application suit service bank whole week ive try open application use think switch another bank best fast solution	Negative	1	0	0
Google Play Store	503dbd18-be01-42b1-a642-91871ca8645b	He is not reliable, he will disappoint you when you need him.	Jafar Abdulmohsin	##########			0	ar	us		1	ar	reliable disappoint need	Negative	1	0	0
Google Play Store	bbd4680d-8d17-4e41-aff4-948f4ef86018	the worst application	ابو ديما	##########			0	ar	us		1	ar	bad application	Negative	1	0	0
Google Play Store	6317d398-3855-4943-a763-362387d86ad4	Very, very bad application. When logging in, it gives you an error after 3 attempts.	ali Alnakhli	##########			0	ar	us		2	ar	bad application log give error attempt	Negative	1	1	0
Google Play Store	ce6d39d2-95ea-4c45-b4d0-13cec9a73a39	Excellent, fast, time-saving, and easy to use.	حبيب م	##########			0	ar	us		5	ar	excellent fast timesaving easy use	Positive	0	0	0
Google Play Store	9f1a9948-0bfe-4c87-8d68-7b69839590d1	It is very bad and slow, and it only opens with mobile network. It disconnects whenever I connect to any network. Today, I am trying to access the application but I am unable to.	عبدالرحمن الوادعي	##########			4	ar	us		2	ar	bad slow open mobile network disconnect whenever connect network today try access application unable	Negative	1	0	1
Google Play Store	12d55f6f-da38-428a-b447-eec00cd99542	You put us in an awkward situation, the application is not working and the trip is approaching, and there is no branch in Al Baha.	Abdo 1234	##########			7	ar	us		1	ar	put us awkward situation application work trip approach branch al baha	Negative	1	1	0
Google Play Store	a0937c98-5715-46d8-b52f-af28f3136260	Everything is wrong. Challenge the subject?	Abdullah Almajnooni	##########			0	ar	us		1	ar	everything wrong challenge subject	Negative	1	0	0
Google Play Store	507fb7f9-7a61-4c12-8ffb-1974cb8a3581	The application has not been working for the past period, it is causing us embarrassment with people. It has been down for five days, and the salary will be transferred to another bank.	Abdulrahman Al ghamdi	##########			0	ar	us		1	ar	application work past period cause us embarrassment people five days salary transfer another bank	Negative	1	1	0
Google Play Store	6dabec80-7a2d-4726-bc33-0746f8cd2dba	Failed program	Abdullah A	##########			0	ar	us		1	ar	fail program	Negative	0	1	0
Google Play Store	f7c1533d-a659-4e9e-b08f-696d06374be5	The application is not working, it closes immediately upon launching it, and if I am connected to Wi-Fi, a screen appears that cannot be bypassed. It's worth mentioning that I am connected to a VPN. The device I am using is Huawei P30.	Meshal Ar	##########			7	ar	us		1	ar	application work close immediately upon launch connect wifi screen appear bypass worth mention connect vpn device use huawei p	Negative	0	1	0
Google Play Store	dcf301ec-0b2b-483e-8f1c-42731fff8336	The application is very bad.. It doesn't work.	تونتي فايف 25	##########			0	ar	us		1	ar	application bad doesnt work	Negative	1	1	0
Google Play Store	da02c5f2-495a-4476-af1c-f7a6a4e80710	My friend, I swear, there are a lot of problems with the garbage application.	Mohammed M.T	##########			0	ar	us		1	ar	friend swear lot problems garbage application	Negative	0	1	1
Google Play Store	4f1a6030-2c26-4a1a-912d-746175f6d12b	Very bad	محمد العتيبي	##########			0	ar	us		1	ar	bad	Negative	1	0	0
Google Play Store	de8f737f-1582-482f-b7ed-e480bc4f0043	The application is not working.	شهيد المسيليم	##########			0	ar	us		1	ar	application work	Negative	0	1	0
Google Play Store	fc18fdf0-18f5-4536-b748-6b43f8f57430	The application is not opening.	جواهر محمد	##########			0	ar	us		1	ar	application open	Negative	0	1	0
Google Play Store	5c6df5c0-5e84-4cb1-8911-fee3030a9efe	The application is unresponsive and unfortunately doesn't open for me.	بندر القحطاني	##########			1	ar	us		1	ar	application unresponsive unfortunately doesnt open	Negative	0	1	1
Google Play Store	96e84ce5-8096-41f6-92a9-5363230a73ce	Why doesn't the application open? I deleted the application and installed it again, but it still doesn't open. It has been more than two weeks like this.	دوسري الدوسري	##########			2	ar	us		5	ar	doesnt application open delete application instal still doesnt open two weeks like	Negative	0	1	0
Google Play Store	b9a3e84e-28ac-40e1-8447-3c1c078f565f	Unfortunately, there is a possibility that it is a fake website or a poorly secured and unreliable bank website. Especially with the increasing daily problems of bank hacks and bank account breaches, it is unfortunately not safe and not secure.	Alarndas 60	##########			0	ar	us		1	ar	unfortunately possibility fake website poorly secure unreliable bank website especially increase daily problems bank hack bank account breach unfortunately safe secure	Negative	1	1	0
Google Play Store	a1317982-f418-47f7-b342-a6bf0b0a0caa	The worst banking application in Saudi Arabia.	Bandar S	##########			0	ar	us		1	ar	bad bank application saudi arabia	Negative	1	0	0
Google Play Store	518f0174-a9f3-4c03-9089-ad8831c5f8cb	Unfortunately, the application is very bad.	خالد الصالح	##########			0	ar	us		1	ar	unfortunately application bad	Negative	1	0	0
Google Play Store	84e6c784-25de-4259-95fd-15b69ad2e336	The application has been experiencing problems for a long time and they have not been resolved. It freezes, and the unfortunate thing is that it has happened to me more than once while I'm traveling.	Mutaz Aljohani	##########			19	ar	us		1	ar	application experience problems long time resolve freeze unfortunate thing happen im travel	Negative	1	1	1
Google Play Store	3a26478c-3cdf-42f5-be82-fb5149f9429b	The application is bad and very slow.	Adnan Hadi	##########			0	ar	us		1	ar	application bad slow	Negative	1	0	1
Google Play Store	f03f4815-197a-483e-8aaa-30523c07edb3	the worst bank in every sense of the word. No application like everyone else, no work service like everyone else. It was a huge mistake to take a loan from you, there is no response, a completely the worst application. It is impossible for this bank to develop. The smallest bank we have is better than you. I call it the failed bank. It should be zero stars.	فهد عبدالله	##########			0	ar	us		1	ar	bad bank every sense word application like everyone else work service like everyone else huge mistake take loan response completely bad application impossible bank develop small bank good call fail bank zero star	Negative	1	1	0
Google Play Store	1a4b3e69-9e8c-43f2-84a7-e690e56d93f7	Very bad application and most of the time it is not functioning.	سلمان الدخيل	##########			1	ar	us		1	ar	bad application time function	Negative	1	1	0
Google Play Store	68d73df2-93f1-4bc7-9da7-5a8ef7179b91	Special bank with fast services and great features.	Bassam Ghh	##########			0	ar	us		5	ar	special bank fast service great feature	Positive	0	0	0
Google Play Store	6ddb478d-72ae-46d2-b623-332ed5378f4a	The worst application in the banking sector.	abdurahman almoafi	##########			0	ar	us		1	ar	bad application bank sector	Negative	1	0	0
Google Play Store	ca24491e-fad6-49ba-8042-e2d58442939f	The application is very, very bad, unfortunately.	ابوالوليد البقمي	##########			0	ar	us		1	ar	application bad unfortunately	Negative	1	0	0
Google Play Store	4cf0cd0d-b67f-488c-986a-aaff306c4308	He doesn't work much on commenting."	a s	##########			0	ar	us		1	ar	doesnt work much comment	Neutral	0	1	0
Google Play Store	55840e24-73b8-41ef-8ac2-a1d23c2b1215	"The application is very slow and has been refusing to log in for a while."	صالح	##########			0	ar	us		1	ar	application slow refuse log	Negative	0	1	1
Google Play Store	67cad613-bcaa-4310-a405-5ef2fd30248e	The worst application, the worst bank, and the worst banking system in the Kingdom. They are supposed to remove it from operation.	جريح شعووور	##########			0	ar	us		1	ar	bad application bad bank bad bank system kingdom suppose remove operation	Negative	1	0	0
Google Play Store	cb9fc60b-7760-4b45-bfe2-2ee80fcaa611	The worst bank and the worst application, may God grant them success.	وديع الهذلي	##########			0	ar	us		1	ar	bad bank bad application may god grant success	Negative	1	0	0
Google Play Store	b5217bfc-4870-4a6c-915f-e70f68a596f9	The application does not open, what is the solution?	علي سادلي	##########			0	ar	us		1	ar	application open solution	Negative	0	1	0
Google Play Store	6cba96f8-7803-4c0c-886d-889d1c41eccc	The application is very very very bad.	عبدالرحمن بالي	##########			0	ar	us		1	ar	application bad	Negative	1	0	0
Google Play Store	ee450b1b-ef51-4fbd-b63b-daa76fdd67c6	The investment bank application is bad. How long will this continue? Where are the programmers and the update messages that you send us? There is no new improvement in your work. We will file a complaint with the Saudi Arabian Monetary Authority (SAMA).	Mohammed AL-ajmi	##########			1	ar	us		1	ar	investment bank application bad long continue programmers update message send us new improvement work file complaint saudi arabian monetary authority sama	Negative	1	1	1
Google Play Store	254494a7-a52f-4969-9c3d-e223987bac10	Very bad, unfortunately... It keeps crashing constantly. I hope it gets developed and the errors get fixed.	Ali Al-Sahood	##########			35	ar	us		1	ar	bad unfortunately keep crash constantly hope get develop errors get fix	Negative	1	1	1
Google Play Store	14f29958-9c1c-4d28-84f6-84a2a6571959	The application is excellent, and the bank is very excellent. I love this bank, it is calm and its services are easy, simple, and distinctive.	hosam aly	##########			0	ar	us		5	ar	application excellent bank excellent love bank calm service easy simple distinctive	Positive	0	0	0
Google Play Store	cd8b22cd-9409-4486-af99-4ec71dcb2f39	There is a malfunction in it.	فيصل المجهول	##########			0	ar	us		3	ar	malfunction	Negative	0	1	0
Google Play Store	151ab7bd-b3bd-4538-9a67-1795b2f8a466	Very strange.	mnawer Alotaibi	##########			0	ar	us		1	ar	strange	Negative	1	0	0
Google Play Store	17e4a968-b350-40ea-a8cb-eec4872e5c11	What opens easily	Khaled Hatem	##########			0	ar	us		1	ar	open easily	Neutral	0	1	0
Google Play Store	4ebccef5-ab4b-4b96-ab71-d458f6fa33bf	The application is very bad and cannot be relied upon to complete electronic banking services. It is extremely bad.	m d	##########			0	ar	us		1	ar	application bad rely upon complete electronic bank service extremely bad	Negative	1	0	0
Google Play Store	66304108-ae6e-4b18-bd83-69ffd905239f	After the latest update, I can no longer access it.	Asas Qwqw	##########			0	ar	us		1	ar	late update long access	Negative	0	1	0
Google Play Store	bce11487-a3fb-4bac-85fe-f7a0b5b0af67	One of the best banking applications, but currently I am facing an issue logging into the application. We have always known that you prioritize customer care.	ابو زايد	##########			3	ar	us		5	ar	one best bank applications currently face issue log application always know prioritize customer care	Positive	0	1	0
Google Play Store	aaf245e4-94d7-4868-a0eb-b8e226f8cbb7	Fingerprint and face unlock are not supported by the device, and there are some problems.	رامي القاضي	##########			0	ar	us		2	ar	fingerprint face unlock support device problems	Negative	0	1	0
Google Play Store	c9bd958a-dbaa-467a-9f1f-99f55a3b7393	Honestly, it's the worst banking app. It requires frequent updates, and even then it's often closed and fails to login.	محمد Mohammed	##########			1	ar	us		1	ar	honestly bad bank app require frequent update even often close fail login	Negative	1	1	0
Google Play Store	18ea5509-37ca-4f32-992d-6b029fcb915c	After the new update, the application no longer opens.	amer aloufi	##########			1	ar	us		1	ar	new update application long open	Neutral	0	1	0
Google Play Store	1add0646-bff8-449b-9607-3b61e88129ce	I don't know why the program I have doesn't open.	فهد الشايع	2023-06-08 04:47:00			0	ar	us		1	ar	dont know program doesnt open	Negative	0	1	0
Google Play Store	5d2533de-11c7-4959-98ab-3f1980f8b71f	After the latest update, the application has become useless. It doesn't work at all. As soon as I try to enter the login data, the application shuts down, and I have to reopen it again, and it continues like this.	Ahmed Al Enazy	2023-06-08 00:00:00			3	ar	us		1	ar	late update application become useless doesnt work soon try enter login data application shut reopen continue like	Negative	1	1	0
Google Play Store	0c891c66-f3a2-4113-bd3a-55197bd9cafb	Very bad experience, I registered in it and every time I enter the application, it kicks me out of the page. I contacted the bank but the issue was not resolved.	Ali Alhazme	##########			0	ar	us		1	ar	bad experience register every time enter application kick page contact bank issue resolve	Negative	1	1	0
Google Play Store	c7d42e49-2410-4e65-896a-55e4b1d04f37	The first place for the worst banking application in the Kingdom.	ara ama	2023-06-07 07:03:00			0	ar	us		1	ar	first place bad bank application kingdom	Negative	1	0	0
Google Play Store	08ac7ec0-a04e-4f6e-a32c-c0b6cb12ebf0	The worst banking application I have... It only works through mobile data or Wi-Fi, forget it if there is no connection... The major issue is that after the latest update, it doesn't work with either mobile data or Wi-Fi. I requested to terminate my relationship with the bank, and an employee called me, saying there will be a solution to all the problems in an upcoming update within a month. It h…	KHALID	2023-06-07 03:58:00			5	ar	us		1	ar	bad bank application work mobile data wifi forget connection major issue late update doesnt work either mobile data wifi request terminate relationship bank employee call say solution problems upcoming update within month two months progress whatsoever bad dishonest bank	Negative	1	1	0
Google Play Store	04660578-2cea-494d-a1cc-c3dfefb1bd96	Very unsuccessful.	MOHMAD MOHMAD	2023-06-07 03:40:00			0	ar	us		1	ar	unsuccessful	Negative	1	0	0
Google Play Store	0517b67c-a2fc-4614-9bad-0a7ba7f02979	With them!! With them, against them!! Against them.	محمد الشرقي	##########			0	ar	us		1	ar		Negative	0	0	0
Google Play Store	ca9c6334-5d9f-4346-8ecd-da76aa799d41	The bank is bad and the application is very bad. It always refuses to open and I always get into trouble. Even checking the electronic account doesn't show a valid application for human use.	Moha99	##########			1	ar	us		1	ar	bank bad application bad always refuse open always get trouble even check electronic account doesnt show valid application human use	Negative	1	1	0
Google Play Store	f098841b-4028-44ae-88f4-b5ca8d651929	He always encounters issues with the shopping card, travel, and security programs. They always read that it is not safe, and also the application does not work. Just opening the application causes it to freeze and then close on its own.	Mohammed Alharbi	##########			3	ar	us		1	ar	always encounter issue shop card travel security program always read safe also application work open application cause freeze close	Negative	0	1	1
Google Play Store	294b7066-2737-426b-8807-a14b84290528	Banking applications are improving, and this is going from bad to worse.	NaieF ALharthi	2023-06-05 08:27:00			0	ar	us		1	ar	bank applications improve go bad bad	Negative	1	0	0
Google Play Store	b3780a02-11ca-4bc0-9b08-f2601c23cfab	Failed program, it's so failed that you can't even open it. As soon as you open it, the page closes.	Salem Abdullah	2023-06-05 07:30:00			1	ar	us		1	ar	fail program fail cant even open soon open page close	Negative	0	1	0
Google Play Store	ab92a160-ce15-49b3-9891-cf1b34e8aac8	Does not accept payment and login registration, it freezes a lot and refuses entry.	Samy Omar	##########			14	ar	us		1	ar	accept payment login registration freeze lot refuse entry	Negative	0	1	1
Google Play Store	84c2c5a2-8055-4cad-a966-1af8895f4d4d	Fail -	naif alessa	##########			0	ar	us		1	ar	fail	Negative	0	1	0
Google Play Store	55bfee98-daa1-4007-b304-8c2ce0359893	"An excellent application that is continuously being developed."	محمد عبد الحق	##########			1	ar	us		4	ar	excellent application continuously develop	Positive	0	0	0
Google Play Store	554e5f0b-d985-45be-81d4-b7f5cdc06baf	The application has recently become very unsuccessful. Every time I need to open the application, I have to restart the device. Also, I cannot use the application through Wi-Fi, only mobile data. That is why I transferred my salary to another bank that respects its customers.	Abdul Ra	##########			26	ar	us		1	ar	application recently become unsuccessful every time need open application restart device also use application wifi mobile data transfer salary another bank respect customers	Negative	1	1	0
Google Play Store	e2fbb738-e879-4f7f-98c3-9a7e4bd1e5dc	The application stops.	Rock Dx	##########			0	ar	us		1	ar	application stop	Neutral	0	1	0
Google Play Store	c8e45ae4-e10d-43b7-91c5-4f0bf4e66edc	The application keeps crashing constantly and I have been involved with it a lot.	Abdulaziz	##########			1	ar	us		1	ar	application keep crash constantly involve lot	Negative	0	1	1
Google Play Store	f59ef188-fa79-4312-aeeb-b8698e200a34	It needs an update to solve the problem of suddenly closing the application.	fadel alzaher	##########			1	ar	us		1	ar	need update solve problem suddenly close application	Negative	0	1	0
Google Play Store	6c510a78-d655-4917-8461-5fabe278d19b	He refuses to save the settings even though I always enter from it. Moreover, he often says there is an error, please try again. Now, I have been trying to log into my account for a few days and he won't let me in.	Hani Albaakati	##########			1	ar	us		1	ar	refuse save settings even though always enter moreover often say error please try try log account days wont let	Negative	0	1	0
Google Play Store	43594f1d-6e36-4965-90b5-86eb6e4d8fca	He annoyed me, so I immediately deleted it and downloaded it again.	Saud Shaiya	##########			0	ar	us		1	ar	annoy immediately delete download	Negative	1	1	0
Google Play Store	1c01db05-9a46-4f09-aa60-55a7118e1542	Bad	Zohir kaddour	##########			0	ar	us		1	ar	bad	Neutral	1	0	0
Google Play Store	ce87049b-e2fc-4fb8-bd88-97be727f90e5	The latest version has issues, especially when adding an amount to the travel card.	Essam	##########			2	ar	us		1	ar	late version issue especially add amount travel card	Negative	0	1	0
Google Play Store	292014fa-300b-4f3d-8d4c-26f45b2a87a9	The application is bad, every time I enter it kicks me out and closes.	أحمد الجبرتي	##########			0	ar	us		1	ar	application bad every time enter kick close	Negative	1	1	0
Google Play Store	124d56b2-a7e0-4b7c-a013-c2ebdeb2ad2d	The application is very bad.. after the recent updates, it doesn't open and when entering the passcode.. an error message appears. Please try again later.	sharaf ali	##########			39	ar	us		1	ar	application bad recent update doesnt open enter passcode error message appear please try late	Negative	1	1	0
Google Play Store	99802b84-378a-4020-bc51-537abbc97ed9	A bad application that doesn't work, all the responses agree on that, and the bank hasn't lifted a finger. The bank doesn't care about its customers, it doesn't deserve to have even one real placed in it.	حسن بن حريب	##########			0	ar	us		1	ar	bad application doesnt work responses agree bank hasnt lift finger bank doesnt care customers doesnt deserve even one real place	Negative	1	1	0
Google Play Store	0344f1a1-0edc-4d9d-b97e-e6f42c916121	The Android mobile system is not working properly for me, it is very very bad.	يوسف النجاد	##########			0	ar	us		1	ar	android mobile system work properly bad	Negative	1	1	0
Google Play Store	df40c124-bec3-4bb1-bc45-2b80e1c676a8	not good	حسين زيد	##########			0	ar	us		3	ar	good	Negative	0	0	0
Google Play Store	f5e08bb8-8e54-4fef-bc49-a557c5cd2d89	There is a flaw in entering.	Aziz Alhagale	##########			0	ar	us		1	ar	flaw enter	Negative	0	1	0
Google Play Store	dccbc727-9159-4926-a0ec-14cc892bcb98	Bad, even if there were less than one star, I would give it. When I go to his store, the username kicks me out of the program. I deleted it, but the same problem persists. I have to restart my device for it to work.	محمد الخليفه	##########			1	ar	us		1	ar	bad even less one star would give go store username kick program delete problem persist restart device work	Negative	1	1	0
Google Play Store	0261e234-8a4d-4bb4-a77f-430ef03b747b	Every time I enter my username and password, the application shuts down immediately. Please solve the problem quickly.	Basem Batawi	##########			2	ar	us		1	ar	every time enter username password application shut immediately please solve problem quickly	Negative	0	1	0
Google Play Store	bf965717-5d6e-4e2e-a4e0-d61def6ee7c5	Very frustrating. Every time I delete the app and download it again.	ع القحطاني	##########			0	ar	us		5	ar	frustrate every time delete app download	Negative	1	0	0
Google Play Store	70bb5a4b-68bc-4eb1-9caa-bb6ac5fa9833	Is it really a banking application? I can't log in at all.	ابو جهاد	##########			0	ar	us		1	ar	really bank application cant log	Negative	0	1	0
Google Play Store	251e9795-5663-44ba-88c5-82b79c407e25	The worst application I have ever encountered. Whenever I try to log into my account, it kicks me out. And when I delete the program and try to reinstall it, I get a message saying the application has stopped working on your device?!	nouf mohmed	##########			0	ar	us		1	ar	bad application ever encounter whenever try log account kick delete program try reinstall get message say application stop work device	Negative	1	1	0
Google Play Store	2e44c5aa-5224-427d-9134-142dcce32746	I do not recommend dealing with them, their branches are not available everywhere. They do not have widespread branches and they do not deliver the card to you. I was the first one to not receive my card. Be careful when dealing with a bank that only has branches in major cities, you might get into trouble just like I did.	Ahmad Asiri	##########			0	ar	us		1	ar	recommend deal branch available everywhere widespread branch deliver card first one receive card careful deal bank branch major cities might get trouble like	Negative	1	0	0
Google Play Store	567bf16c-80ad-49b8-b188-d431de8ab67a	It's been six months and the application still doesn't work on Huawei phones except on mobile data, and the software developer hasn't done anything about it. This indicates negligence and shows that the developer lacks sufficient expertise, which ultimately reflects poorly on the bank. What's worse is that the bank doesn't seem to care about the issue, and there's nothing worse than that.	Majed Khadrawi	##########			7	ar	us		1	ar	six months application still doesnt work huawei phone except mobile data software developer hasnt do anything indicate negligence show developer lack sufficient expertise ultimately reflect poorly bank whats bad bank doesnt seem care issue theres nothing bad	Negative	1	1	0
Google Play Store	761978db-b8a1-4b82-bc65-0d218bd26e80	It has been more than a month and a half, and the application is very bad. It opens and closes repeatedly. I hope the problem is resolved.	عبدالله 2021	##########			1	ar	us		1	ar	month half application bad open close repeatedly hope problem resolve	Negative	1	1	0
Google Play Store	6e841421-ebb2-45f1-abfe-8e93f58eea7d	May God remove him from the application and from the bad bank.	عمر الحارثي	##########			0	ar	us		1	ar	may god remove application bad bank	Negative	1	0	0
Google Play Store	eee0cf14-f49f-4674-94e6-356317ec2206	For more than two months, the application has not been working. As soon as you press on the username or password field, the application shuts down. Great work, keep it up (:	Abdurrahman Alfaifi	##########			3	ar	us		1	ar	two months application work soon press username password field application shut great work keep	Negative	0	1	0
Google Play Store	f2178241-b9ab-42e7-b3d0-43c0973d362d	The application has become very slow and does not open throughout the day. I've been trying, and I don't know what the problem is, even your website in the browser has the same problem.	Nouraldeen Alsharidi	##########			1	ar	us		1	ar	application become slow open throughout day ive try dont know problem even website browser problem	Negative	0	1	1
Google Play Store	e52e94f4-af31-46bd-8043-fa6d7578b3a8	"The worst banking application in the world, suddenly you find yourself outside the application."	ثامر العمري	##########			0	ar	us		1	ar	bad bank application world suddenly find outside application	Negative	1	0	0
Google Play Store	e47a0cb6-1ab7-4ff6-9714-c227e6d8fd65	Unfortunately, it's very, very, very frustrating. Every time I try to log into the system, it kicks me out right away or says the user ID is incorrect. This problem has been going on for over two months now and it still hasn't been resolved.	محمد الزهراني	##########			5	ar	us		1	ar	unfortunately frustrate every time try log system kick right away say user id incorrect problem go two months still hasnt resolve	Negative	1	1	0
Google Play Store	7c937ec7-c0cb-43fe-97da-0dd719a8ae7a	The application crashes a lot when the password is entered. It always has application issues. 😭😭😭	salim killua AMV	##########			0	ar	us		1	ar	application crash lot password enter always application issue	Negative	0	1	0
Google Play Store	7bdb4bc8-a3c5-4cac-86b5-a19603eef4c0	The application "Sayer bad" every time we try to enter, it kicks us out. Fix your application.	فيصل البلغيثي	##########			0	ar	us		1	ar	application sayer bad every time try enter kick us fix application	Negative	1	1	0
Google Play Store	5b0f7b0b-d837-4293-a5ba-e71aaadd258c	Very bad and tired.	عزووز القبيسي	##########			0	ar	us		1	ar	bad tire	Negative	1	0	0
Google Play Store	12b59f11-8d3d-4272-aa9f-47bcc4c88f52	Where is your investment bank application going to be offline for a period of time?	Adel Alamer	##########			0	ar	us		1	ar	investment bank application go offline period time	Neutral	1	1	1
Google Play Store	d1ac2a0a-d33e-40d8-bc24-4a93b6052b9e	There is a problem with the application where it closes itself when entering the username or password.	Wael Alali	2023-05-09 05:15:00			1	ar	us		1	ar	problem application close enter username password	Negative	0	1	0
Google Play Store	056b6ed5-3d66-4b71-8b38-307dfaf2e92c	The application is not working!!!!	ابو فيصل سعد	##########			0	ar	us		1	ar	application work	Negative	0	1	0
Google Play Store	3b3bd12d-d798-4ac2-bbe4-1062316dc672	The application is very bad, it does not work. I need to uninstall it and reinstall it again, and it does not accept opening.	Saleh Mohammad	2023-05-08 06:09:00			7	ar	us		1	ar	application bad work need uninstall reinstall accept open	Negative	1	1	0
Google Play Store	a4a43ddc-715e-4a3b-b726-ba91681224ec	What is the solution for this page appearing? (It seems that you are connected through a virtual private network) I have two Android devices, one opens fine for me and this is what gives me the opportunity to enter my username!!	Hope Care	2023-05-08 03:27:00			0	ar	us		1	ar	solution page appear seem connect virtual private network two android devices one open fine give opportunity enter username	Neutral	0	1	0
Google Play Store	6e6af8b0-0a92-4104-a4ea-f2fa781a6527	The bank doesn't care at all about the application problems. The application doesn't log out and often doesn't open. Currently, I am outside the kingdom and this app and the miserable bank are not working 👎.	me 1200	##########			0	ar	us		1	ar	bank doesnt care application problems application doesnt log often doesnt open currently outside kingdom app miserable bank work	Negative	1	1	0
Google Play Store	4a2cbb12-26ae-44ed-a4b3-1a10f96355ea	After entering all the required data correctly, it says your data is incorrect 😠	zayed alsaad	2023-05-07 06:59:00			1	ar	us		1	ar	enter require data correctly say data incorrect	Negative	1	1	0
Google Play Store	4781e2d6-51fe-4473-820b-99198258ff39	Does the bank management not know? The application has been very bad for a long time. It constantly crashes and freezes on the device and exits automatically before entering the password.	فايد السعيد	2023-05-07 04:32:00			2	ar	us		1	ar	bank management know application bad long time constantly crash freeze device exit automatically enter password	Negative	1	1	1
Google Play Store	dd66eb7e-3d5a-4a87-93c9-ecb1290a9a02	There is a complete malfunction in the application and the bank problem has not been resolved. They have been contacted with no avail.	وليد خواجي	##########			1	ar	us		1	ar	complete malfunction application bank problem resolve contact avail	Negative	0	1	0
Google Play Store	02e31b77-9886-4549-af19-166a4f4e4805	The device gave me a warning that there is a virus and I need to delete it. What's the matter? The update on April 17, 2023, the application still suffers from a catastrophic failure. Every time I enter, it kicks me out. I deleted it and downloaded it again, but the same problem persists. More than one person is experiencing the same issue, so no one can say the problem is with my device. The upd…	moh Has	2023-05-04 06:35:00			3	ar	us		1	ar	device give warn virus need delete whats matter update april application still suffer catastrophic failure every time enter kick delete download problem persist one person experience issue one say problem device update april catastrophic failure still haunt bank fail far solve problem bank continue cause us problems travel god big hassle travelers	Negative	0	1	0
Google Play Store	be3a2c81-3bd3-4a8c-8ae0-25e0dbf05ab9	The application does not accept writing in the password and username fields.	Faisal	##########			0	ar	us		1	ar	application accept write password username field	Negative	0	1	0
Google Play Store	a8060bb8-7008-46b3-bc83-69cc71bc74a6	"On Android, it locks immediately."	Nawaf	##########			0	ar	us		1	ar	android lock immediately	Neutral	0	1	0
Google Play Store	33b8f5d4-3cd6-44b8-9601-30597924f18d	"Crappy application"	Faisal Alhusainy	##########			0	ar	us		1	ar	crappy application	Negative	1	0	0
Google Play Store	5044f0d0-9b4f-43fe-bb82-8cf3ebab76ac	the worst application and the worst bank.	Salih Alghanim	2023-05-03 03:09:00			0	ar	us		1	ar	bad application bad bank	Negative	1	0	0
Google Play Store	af4eea6a-f066-4434-b7c2-603df483c0c5	Good.	KHAIJAH TAHR	##########			0	ar	us		3	ar	good	Positive	0	0	0
Google Play Store	97f5e678-16e6-4593-a81a-43ee8b746e78	Exiting the application without a reason.	falcon	2023-05-02 04:51:00			0	ar	us		2	ar	exit application without reason	Negative	0	1	0
Google Play Store	c615797d-1809-434d-89ad-c0ab2b6c68e3	One of the worst applications, and it is not appropriate to be a banking application or anything for me. I am amazed at the bank's management and its disregard for the complaints of the majority of customers regarding the application. I only gave one star to leave a comment.	A.K Saad	2023-05-01 05:51:00			0	ar	us		1	ar	one bad applications appropriate bank application anything amaze bank management disregard complaints majority customers regard application give one star leave comment	Negative	1	0	0
Google Play Store	d95a68c3-7e88-41e7-af5d-adbc37521854	The application stopped working on my Huawei P30 and there is a note written on Google Play that the application will stop working on your device.	مشعل القحطاني	##########			0	ar	us		1	ar	application stop work huawei p note write google play application stop work device	Negative	0	1	0
Google Play Store	bcc3cee7-c608-4d7a-8fc2-67e4e0767132	Excellent very very very	سليمان محمد القحطاني	##########			0	ar	us		5	ar	excellent	Positive	0	0	0
Google Play Store	2de121da-cb1b-4f7b-8376-9515c1882e2d	The worst application so far, it cuts off and then exits, and we cannot use it.	Mohammed Al-jamaan	##########			1	ar	us		1	ar	bad application far cut exit use	Negative	1	1	0
Google Play Store	d5b11555-8fb8-442b-89cb-f309745b96cb	When I open the application, it kicks me out. I've tried reinstalling it, but the same problem persists. Sometimes it works fine.	سالم الرحيلي	##########			1	ar	us		2	ar	open application kick ive try reinstall problem persist sometimes work fine	Negative	0	1	0
Google Play Store	80e2d8fc-38a6-4e26-bbaa-c27732cf0c4c	The commentator is not able to open the application.	سوسو	##########			0	ar	us		1	ar	commentator able open application	Negative	0	1	0
Google Play Store	99933e08-4bcd-49f4-b4ed-8c0251a93672	Failure, failure, failure, you largest backward bank.	Moh Ahm	##########			0	ar	us		1	ar	failure failure failure large backward bank	Negative	1	1	0
Google Play Store	8f329414-1a3a-4491-8771-ac347111aa02	Simply entering the username will log you out of the program.	Alaa al sayegh	##########			0	ar	us		1	ar	simply enter username log program	Neutral	0	1	0
Google Play Store	6ab1938d-e8de-420a-9145-017ba3f7eb37	My dear friend, the program needs development. Hey manager, see how your work is going, see how my work is disrupted because of you.	Aa Kk	##########			0	ar	us		1	ar	dear friend program need development hey manager see work go see work disrupt	Negative	0	1	0
Google Play Store	82cef922-fe32-4a68-bb82-d3e5ef8d8472	Very bad, as if it is from the Stone Age, all the banks have evolved except for this bank.	Fares Go	##########			6	ar	us		1	ar	bad stone age bank evolve except bank	Negative	1	0	0
Google Play Store	09062c65-ce79-4ea0-b66c-4a6291dd33da	Very bad application... It freezes and kicks me out of the app. And if I try to create a new account, it tells me that the service is not available and gives it a negative ten as a rating.	Ss Aa	##########			0	ar	us		1	ar	bad application freeze kick app try create new account tell service available give negative ten rat	Negative	1	0	1
Google Play Store	f3b73912-7696-4957-9b08-a127947d9b4c	The application is useless, there is no update or alternative, and the bank is the worst.	محمد مهياع	##########			0	ar	us		1	ar	application useless update alternative bank bad	Negative	1	0	0
Google Play Store	d375ffc7-fa58-41ea-a0f1-cb9e844bba46	It's really bad, it's not working at all. Every time I try to connect, it tells me that I'm running a VPN.	ammar alhuthly	##########			2	ar	us		1	ar	really bad work every time try connect tell im run vpn	Negative	1	1	0
Google Play Store	49703990-df5f-4ce4-8cce-5a597f1974e3	the worst application from the worst bank, lacking technology and unable to retain customer information.	عبدالرحمن الراجحي	##########			0	ar	us		1	ar	bad application bad bank lack technology unable retain customer information	Negative	1	0	0
Google Play Store	e18ed1af-6dce-4274-b9f7-eee25edfa06a	The application has a problem with the login process and is very annoying.	Mohammed K AlBaqashi	##########			3	ar	us		1	ar	application problem login process annoy	Negative	1	1	0
Google Play Store	7c6cb0e1-b9fe-4d3e-a188-ed03e9b35418	Failed program	Abdul Rahman	##########			0	ar	us		1	ar	fail program	Negative	0	1	0
Google Play Store	71b20089-ef64-4a65-8ea6-8575715f1541	There is a problem with the application on Android devices. If you try to enter the username or password, the application will freeze. This has been happening since the beginning of March and the problem has not been resolved yet.	Mali Mali	##########			38	ar	us		3	ar	problem application android devices try enter username password application freeze happen since begin march problem resolve yet	Negative	0	1	1
Google Play Store	732cfeda-48b0-4c4a-8aae-620210f1ef84	Very bad, when you enter the application it takes you out of the application.	عشقي الجنوب	##########			1	ar	us		1	ar	bad enter application take application	Negative	1	0	0
Google Play Store	23eda015-817d-4ee5-a8a6-35e67cd764b8	The application is not working. Please solve the problem. I have deleted the application and reinstalled it, but the same problem persists.	عبدالرحمن العمير	##########			1	ar	us		1	ar	application work please solve problem delete application reinstall problem persist	Negative	0	1	0
Google Play Store	b253eab4-e45e-4ce0-8d83-552a64806bd9	Tired, it's not worth it to open an account, the services are bad.	قناة إسلامية	##########			1	ar	us		1	ar	tire worth open account service bad	Negative	1	0	0
Google Play Store	bb08ba17-11d6-42f8-9038-ee496e11a1a1	He always stays offline, gets drunk, and doesn't respond.	بشرى ع od@Bu	##########			0	ar	us		1	ar	always stay offline get drink doesnt respond	Negative	0	1	0
Google Play Store	7563643a-8951-414e-8ee0-191db5101acd	Very bad, the application doesn't open... despite the fact that I have uninstalled and reinstalled it multiple times.	ابو سالم	##########			3	ar	us		1	ar	bad application doesnt open despite fact uninstalled reinstall multiple time	Negative	1	1	0
Google Play Store	625ea101-ee36-457f-8db2-93edd7075b38	Very bad	F Hassan	##########			0	ar	us		1	ar	bad	Negative	1	0	0
Google Play Store	da431850-3e43-4b3e-a886-9452a3b0dbca	The application is the worst and does not open.	Abab3229 Abab3229	##########			1	ar	us		1	ar	application bad open	Negative	1	1	0
Google Play Store	fd04180d-c4ef-4bfe-a21e-33bf696355f9	He was working well, but now he is not working.	نايف الغازي	##########			0	ar	us		1	ar	work well work	Negative	0	1	0
Google Play Store	a874cc23-7d9a-4b88-9412-989b81fbd3b9	A bad program that suddenly crashes and always freezes. It's a flaw in such a large bank, and the application problem has been going on for a long time and they haven't solved it.	فهد الفهد	##########			6	ar	us		1	ar	bad program suddenly crash always freeze flaw large bank application problem go long time havent solve	Negative	1	1	1
Google Play Store	845db286-051e-4a2d-a683-e4258471a49b	The application is going from bad to worse.... I don't know, every time I try to log into my account it tells me there is an error.	EMAN A&A	##########			0	ar	us		1	ar	application go bad bad dont know every time try log account tell error	Negative	1	1	0
Google Play Store	ef553dd4-04a2-4db6-92dd-0a4c07f08da0	The application is not opening and there is a problem with it for some time.	أبو لطيفة	##########			1	ar	us		1	ar	application open problem time	Negative	0	1	0
Google Play Store	011dc7cf-13d9-4013-881c-764fa113da16	"Very bad application with frequent maintenance, but there is no use in commenting and reporting errors, and there is no quick login feature to protect Al-Rajhi bank."	عبدالعزيز الزهراني	##########			0	ar	us		1	ar	bad application frequent maintenance use comment report errors quick login feature protect alrajhi bank	Negative	1	1	0
Google Play Store	999a77a8-23ba-4ce4-9320-a972c441b8fd	The program has become extremely bad as it does not open for me and an error message appears. If there were less than one star, I would have given it to it.	yousef Al khamees	##########			5	ar	us		1	ar	program become extremely bad open error message appear less one star would give	Negative	1	1	0
Google Play Store	3e81d549-8148-4e49-92e9-85e5476686a2	The application is not working + it does not connect to the Wi-Fi network.	Fawaz Ali	##########			6	ar	us		1	ar	application work connect wifi network	Negative	0	1	0
Google Play Store	48cc8f7a-4434-4dd1-be62-fbfd66b91e52	The application is not working and it embarrassed me in one of the stores. I was trying to transfer an amount and I entered the application, but it kept getting out and I tried multiple times with no luck.	فهد الحسيني	##########			0	ar	us		1	ar	application work embarrass one store try transfer amount enter application keep get try multiple time luck	Negative	1	1	0
Google Play Store	f2962ca0-4f89-471d-9c71-ccd197066240	It has not been working for about a month.	HESHAM	##########			2	ar	us		1	ar	work month	Negative	0	1	0
Google Play Store	f9070f75-30f8-411e-81ee-146a8b8d2db0	The application requires continual monitoring and updating of customer feedback for security reasons.	Fal Con	##########			1	ar	us		3	ar	application require continual monitor update customer feedback security reason	Neutral	1	0	0
Google Play Store	d235a67a-a62e-4e96-a7d5-756acad31388	The program is not working.	محمد الخلف	##########			0	ar	us		1	ar	program work	Negative	0	1	0
Google Play Store	d6459005-1518-4a3a-88b6-146c5f3dcde3	He hesitates and does not accept entry.	Mr mansour	##########			0	ar	us		1	ar	hesitate accept entry	Negative	0	1	0
Google Play Store	2fbb733e-d643-4d98-ab30-d3c6652dbf66	"The application is very useless and fails to work properly, it only increases frustration."	IlIl	##########			4	ar	us		1	ar	application useless fail work properly increase frustration	Negative	1	1	0
Google Play Store	6728e58a-2a8b-4a48-aaea-5cb62a665346	Unfortunately, even customer reviews are not responded to.	H.A.K woodworking	##########			0	ar	us		1	ar	unfortunately even customer review respond	Negative	1	1	0
Google Play Store	5dfe82f2-4b61-4006-9713-b54ddc09a4d1	the worst application and the bank is even more failed than it.	ابو حاتم المكي	##########			0	ar	us		1	ar	bad application bank even fail	Negative	1	1	0
Google Play Store	27ff0515-15ad-4885-b618-ea48fdd2a1d7	It needs a lot of improvements and reforms. 👎 One of the most important features in banks nowadays is providing a strong application.	A 0	##########			2	ar	us		1	ar	need lot improvements reform one important feature bank nowadays provide strong application	Positive	1	0	0
Google Play Store	1b21042c-cae9-42f0-a2a2-67784065e988	The application has been running for two weeks, but it is not functioning and there is no response from the bank. The bank is going through a major crisis.	aziz swelan	##########			0	ar	us		1	ar	application run two weeks function response bank bank go major crisis	Negative	1	1	0
Google Play Store	a8760a72-1a3c-492e-b2d1-945869bdc5b2	Very bad, and now it has become the worst. The application is not working; it is extremely unsuccessful.	Mhamad Alalwan	##########			3	ar	us		1	ar	bad become bad application work extremely unsuccessful	Negative	1	1	0
Google Play Store	63196b8a-0275-490a-90a9-0bd87985402d	Not good at all, really really terrible, I swear it's garbage 😤😤😤	Layla Hamdi	##########			0	ar	us		1	ar	good really really terrible swear garbage	Negative	1	0	0
Google Play Store	3dcb0d6e-b5de-46ce-8d86-931a97150ebf	"The application does not deserve a star. It is extremely slow. When trying to log in, it kicks you out of the application (fail)."	walid ww	##########			0	ar	us		1	ar	application deserve star extremely slow try log kick application fail	Negative	1	1	1
Google Play Store	31427eeb-c639-4744-9ddb-114f9081dea9	I have been feeling bad for 3 days and he refused to work with me.	عبدالله القحطاني	##########			0	ar	us		1	ar	feel bad days refuse work	Negative	1	1	0
Google Play Store	d6df9536-6304-4edf-a06c-92f0b4dc4504	Less than 10 days left for me and the application is still not working. Which bank is this? Its application is very bad. We want a professional solution to fix the problem.	Saloom Alothman	##########			0	ar	us		1	ar	less days leave application still work bank application bad want professional solution fix problem	Negative	1	1	0
Google Play Store	e50abac7-bf4b-424b-ac76-ccfb28fa269e	If there is a problem with logging in, please solve it so that we do not delay in making the payment.	Shaya Qh	##########			0	ar	us		1	ar	problem log please solve delay make payment	Neutral	0	0	1
Google Play Store	2eae30a5-579f-44bc-ba02-78dc16d7b8be	There is a problem with the application after the latest update. It is not working and it gives an error message "An error has occurred, please try again later." We request the support department in the electronic services to quickly solve the problem. Update: The issue has been resolved by deleting the application and reinstalling it.	Wondurful world	##########			11	ar	us		5	ar	problem application late update work give error message error occur please try late request support department electronic service quickly solve problem update issue resolve delete application reinstall	Negative	0	1	0
Google Play Store	bbf135be-ac2f-49a3-91f1-987cb95d4c50	It is heavy, hangs a lot, doesn't open properly, and gets out of the page. My rating for it is the worst. The developer of the program is very bad because the problems are repeated and ongoing without a solution, in comparison to other banking applications whose updates are excellent and quickly fix any mistakes.	عبدالكريم خزام	##########			11	ar	us		1	ar	heavy hang lot doesnt open properly get page rat bad developer program bad problems repeat ongoing without solution comparison bank applications whose update excellent quickly fix mistake	Negative	1	1	1
Google Play Store	d1800177-f1f6-4325-8fce-64228e3b9065	Excellence in skill.	Bakr Albakr	2023-04-09 04:57:00			0	ar	us		5	ar	excellence skill	Positive	0	0	0
Google Play Store	f10b2578-294f-4d4d-bfc9-248c38ff9e09	The application's comments section has been disabled for a few days and the management is inactive, not concerned about the customers. It's a loss to open an account with you.	Has Sae	##########			0	ar	us		1	ar	applications comment section disable days management inactive concern customers loss open account	Negative	0	1	0
Google Play Store	7a4d1186-4720-4351-8856-bd5813334fcf	The application has become very bad and you cannot log in. The application has been deleted because the problem was not resolved.	Mohamed Elhassan Yagoub	##########			0	ar	us		1	ar	application become bad log application delete problem resolve	Negative	1	1	0
Google Play Store	8357fa9f-ad20-4252-9a13-1833d7af6d5d	"Very nice application"	Slman Al	##########			0	ar	us		1	ar	nice application	Positive	0	0	0
Google Play Store	11d2d3a5-ad16-47f0-8ed3-2a58153e24d6	I couldn't download the application.	ٰ ٖ	##########			0	ar	us		1	ar	couldnt download application	Negative	0	1	0
Google Play Store	1025713d-77c7-434f-ba93-f68f59f1e6c7	The worst bank I have ever dealt with, all of its services are full of mistakes, from login errors to transfer errors. They don't have any offers at all. And if you want to register with them, they will tell you that your basic salary must exceed 4000.	Faiz Almutairi	##########			2	ar	us		1	ar	bad bank ever deal service full mistake login errors transfer errors dont offer want register tell basic salary must exceed	Negative	1	1	0
Google Play Store	a6ac91db-add7-45eb-8b47-8187ac51ced0	The program is not working.	محمد المري	##########			0	ar	us		1	ar	program work	Negative	0	1	0
Google Play Store	61c3ba31-15c9-4ae9-bfd2-ae9f1087861f	He never agreed to open it.	Abdullah Alshahrani	2023-04-06 01:39:00			0	ar	us		1	ar	never agree open	Neutral	0	1	0
Google Play Store	bc298b1c-141d-4793-8eeb-234f44d3f230	The application is very bad, it does not open.	Ahmed Elhefnawy	##########			1	ar	us		1	ar	application bad open	Negative	1	1	0
Google Play Store	c3e64f05-46a3-4506-83b1-838383480cf1	Very bad experience	عبده الكيادي	2023-04-05 01:52:00			0	ar	us		1	ar	bad experience	Negative	1	0	0
Google Play Store	194fc0d0-3304-4cbf-997b-f6dfc6fc502b	He/she hangs.	مرسيدس بنز	2023-04-05 01:12:00			0	ar	us		1	ar	heshe hang	Neutral	0	0	1
Google Play Store	be5ad18b-8b96-405f-9d26-abd7ffbec062	The application has not been working for approximately 3 days, and the bank apologizes, stating that the issue is from my phone. They are asking me to change the phone. We hope for an update to the application.	SAUD AL HUZAIMI	##########			6	ar	us		1	ar	application work approximately days bank apologize state issue phone ask change phone hope update application	Negative	0	1	0
Google Play Store	78dc6fd0-0ed1-450f-8624-24b47a2573bd	For almost the fourth time, I delete the application and download it again, but honestly, it doesn't work. It is the worst banking application I have dealt with.	Ali Mohamed	##########			1	ar	us		1	ar	almost fourth time delete application download honestly doesnt work bad bank application deal	Negative	1	1	0
Google Play Store	98edf414-bfa4-48df-879d-bd8d06aa5e2e	Zabal application	Faisal -Hk	##########			0	ar	us		1	ar	zabal application	Neutral	1	0	0
Google Play Store	6965bfcd-6c92-4ff5-bba1-7472f1f9d474	The worst bank, I have been trying for over a week and nothing has happened. I contacted them and they promised to send me a text message, but nothing reached me.	منال النجعي	##########			0	ar	us		1	ar	bad bank try week nothing happen contact promise send text message nothing reach	Negative	1	0	0
Google Play Store	4052a969-0083-4216-b090-b22bfb8e3179	Catastrophic software problems!	undefined	2023-04-03 03:22:00			1	ar	us		1	ar	catastrophic software problems	Negative	1	1	0
Google Play Store	44770d39-c1c3-49b9-933a-d299d095f9d3	The application is very, very, very, very, very bad. Just pressing the password box takes you out of the app. I deleted it and downloaded it a thousand times, but it's still very, very, very bad.	alnezk lol	2023-04-03 02:16:00			45	ar	us		1	ar	application bad press password box take app delete download thousand time still bad	Negative	1	1	1
Google Play Store	8f49c821-c80f-4464-bf8d-fc9ed7b856a5	Problem with login.	أبو يزن الثبيتي	##########			3	ar	us		1	ar	problem login	Negative	0	1	0
Google Play Store	3784a64f-0c51-49d9-9c2d-db7a7856e59f	The application hasn't been opened for more than a week and there is no interest from the bank.	I E	##########			0	ar	us		1	ar	application hasnt open week interest bank	Negative	0	1	0
Google Play Store	47d4b508-b971-4d63-a618-b7f2f08b0d97	The application is not working at all. Find a solution for yourselves, not your fathers or your fathers' bank.	نواف	##########			1	ar	us		1	ar	application work find solution father father bank	Negative	1	1	0
Google Play Store	63e1cbff-909a-48aa-baaa-3cb0c98bfa04	There is a problem with the application, I cannot log into my account.	محمد السبع	##########			3	ar	us		1	ar	problem application log account	Negative	0	1	0
Google Play Store	679a442b-8d20-4beb-a88f-008e05591ec4	Bad	Fahad Alhafs	##########			0	ar	us		1	ar	bad	Neutral	1	0	0
Google Play Store	798a9ebb-0f98-4ad7-badf-85dc79103655	The application is bad, bad, bad. It was initially slow, freezes, and sometimes crashes, but we managed to finish our transactions. Now we can't do anything and unfortunately, it caused a big problem for me while I was traveling. Brothers, there are bank customers who use this application, it's unbelievable that there are all these basic errors.	Ibrahim Alenezi	2023-04-02 07:39:00			2	ar	us		1	ar	application bad bad bad initially slow freeze sometimes crash manage finish transactions cant anything unfortunately cause big problem travel brothers bank customers use application unbelievable basic errors	Negative	1	1	1
Google Play Store	4b4d325a-b9c0-4847-9364-c89fe89a0cfb	Very bad program and bank... The program has not been working for more than three days... And the bank's services are few and ineffective.	ammar felemban	2023-04-02 00:20:00			0	ar	us		1	ar	bad program bank program work three days bank service ineffective	Negative	1	1	0
Google Play Store	627e8057-dadd-48d8-872c-6d550afbef2c	Internal transfer is not accepted.	عبدالرحمن الشهري	##########			0	ar	us		5	ar	internal transfer accept	Negative	0	1	0
Google Play Store	b2af67e9-bb91-4c03-8c9a-3407250003ad	The application is very bad, it has not been working for a week and I cannot log in.	Rstooom Bona	##########			4	ar	us		1	ar	application bad work week log	Negative	1	1	0
Google Play Store	dadf5c10-7a20-467a-a598-36f72c11af06	Very bad, does not work.	Fahad	##########			0	ar	us		1	ar	bad work	Negative	1	1	0
Google Play Store	cebe4b91-58e6-43b5-a55f-1ab8872fdfa1	I wish you hadn't made any general improvements to the application. It now crashes and doesn't allow login. Please update it or revert it back. The application has been slow for a long time when compared to other banks upon login.	Mr.Bandar	##########			6	ar	us		1	ar	wish hadnt make general improvements application crash doesnt allow login please update revert back application slow long time compare bank upon login	Negative	1	1	1
Google Play Store	11de1a50-ce5e-4708-8dfe-8eaf5ffb7e74	Very heavy and keeps getting stuck.	محمد ال رفيع	##########			0	ar	us		1	ar	heavy keep get stick	Negative	1	0	1
Google Play Store	fe707a87-9589-4f8b-ba18-0ce80ae66081	He doesn't work for me anymore. Why?	ناصر مبارك	##########			0	ar	us		1	ar	doesnt work anymore	Negative	0	1	0
Google Play Store	e960a87c-a6e7-47e9-be4b-4df3aed6d847	Unfortunately, it no longer works. 😔	Abdullah Al jari	##########			0	ar	us		1	ar	unfortunately long work	Negative	0	1	0
Google Play Store	307a5616-9973-4c03-b8a3-284d89f98363	I have been trying for 4 days to log in through the application, but it completely refuses. Honestly, I changed my rating to one star because it seems that you haven't made any changes to the application. It used to be smooth, but now it doesn't accept my login at all.	أبوالحسن العسلي	##########			6	ar	us		1	ar	try days log application completely refuse honestly change rat one star seem havent make change application use smooth doesnt accept login	Negative	1	1	0
Google Play Store	cc34e40d-5518-49e2-a2af-d11cf2e0c65c	Very bad and poor application with its windows and services provided, and it is not smooth in transitioning from one service to another. Hanging and crashing is the general characteristic of the application, and when trying to log in, the application closes itself and exits.	Abdullah MA	##########			5	ar	us		1	ar	bad poor application windows service provide smooth transition one service another hang crash general characteristic application try log application close exit	Negative	1	1	1
Google Play Store	e205ec73-81e3-4d95-a4ea-0999b25f5610	The application is hanging and not opening, you've disrupted our business and I can't complete any transactions! And if there is a new application, please upload it to the store.	Majeed Darwish	##########			6	ar	us		1	ar	application hang open youve disrupt business cant complete transactions new application please upload store	Negative	0	1	1
Google Play Store	da1750ff-ceb5-401f-b8b8-358687798289	The program is not working 😭	medo bondar	##########			0	ar	us		1	ar	program work	Negative	0	1	0
Google Play Store	3bd1eb4f-2623-4e94-828b-1b57b3c0b169	Someone entered the account, I deleted them and reported them multiple times.	Hussain Akour	##########			0	ar	us		1	ar	someone enter account delete report multiple time	Negative	0	1	0
Google Play Store	33c32347-b26a-49f6-b502-ede3f20aaa0a	Bank lagging behind for years.	Abdullah	##########			0	ar	us		1	ar	bank lag behind years	Negative	1	0	0
Google Play Store	60feaed2-1cdf-4fd7-922f-300d48105daf	Very bad	Turkeya Istanbul	##########			0	ar	us		1	ar	bad	Negative	1	0	0
Google Play Store	6a282d3b-12fc-4f2c-bb0f-a7b976d471b5	He acts in a bad way.	abu Fares	##########			0	ar	us		1	ar	act bad way	Negative	1	0	0
Google Play Store	2c5580f3-76ef-4224-961e-eac0b61d6da2	Very bad, it has stopped working. I receive an error message stating that there was some kind of error. When I reported the problem to the bank, their only solution was to delete the application and reinstall it, but the same problem persists.	hatim albalawi	##########			77	ar	us		1	ar	bad stop work receive error message state kind error report problem bank solution delete application reinstall problem persist	Negative	1	1	0
Google Play Store	fe4c27e3-f35e-4cbe-a455-17fe35c2eeba	Very excellent, the best services.	Qwer Asd	##########			0	ar	us		5	ar	excellent best service	Positive	0	0	0
Google Play Store	78765ee8-56fb-4da1-a897-dd4b5d0b0971	It does not work and hangs on a yellow screen after this update.	moom m	##########			9	ar	us		1	ar	work hang yellow screen update	Negative	0	1	1
Google Play Store	00f0b9b9-0cb5-4cc3-a8da-bc8424c28140	After the latest update, it no longer works on the Galaxy Flip.	M AA	##########			10	ar	us		4	ar	late update long work galaxy flip	Negative	0	1	0
Google Play Store	215a33b5-6855-4abe-87f1-8a621c8a6fb2	It is very bad; it happens ten times before we enter.	عبدالله بن علي	##########			3	ar	us		1	ar	bad happen ten time enter	Negative	1	0	0
Google Play Store	288b53c1-56ba-4811-a369-09e98e875af9	"The worst primitive application and the worst bank I have ever seen, I regret dealing with it."	رياض الدغيم	##########			0	ar	us		1	ar	bad primitive application bad bank ever see regret deal	Negative	1	0	0
Google Play Store	dc376e72-8a10-45e7-acc7-8bb9b9d86a13	Very bad.	ناصر العلي	##########			0	ar	us		1	ar	bad	Negative	1	0	0
Google Play Store	6f58220e-ee06-4443-b89c-fd39f0c1874a	Unfortunately, his comments have been bad lately.	F 15	##########			0	ar	us		1	ar	unfortunately comment bad lately	Negative	1	0	0
Google Play Store	c4461a7d-c236-4ac2-b84d-b2c49f9a6a70	The application doesn't work properly and freezes deducted amounts, and you don't know the remaining balance due to the lack of clarity in deducted amounts in a timely manner. It is the worst and poorly designed application.	Eid Klefh	##########			0	ar	us		1	ar	application doesnt work properly freeze deduct amount dont know remain balance due lack clarity deduct amount timely manner bad poorly design application	Negative	1	1	1
Google Play Store	bab095ea-9819-4587-b1bd-c0b661eba4a7	Efficient and user-friendly	محمد ال ربيع	##########			1	ar	us		5	ar	efficient userfriendly	Positive	1	0	0
Google Play Store	64639f91-abaa-4a2f-b3a4-3d354dda47c8	The application constantly freezes and has become very bad, unfortunately. It freezes during transfers and causes us trouble. We tried updating it but it didn't help. It's frustrating, and we need to log in quickly but it keeps freezing. 🤦🏻‍♀️	Moo oon MK	##########			6	ar	us		1	ar	application constantly freeze become bad unfortunately freeze transfer cause us trouble try update didnt help frustrate need log quickly keep freeze	Negative	1	1	1
Google Play Store	29180a5f-0117-4a85-a61d-ae53e0b782b4	The application has not been working for more than 3 days, and an error message appears.	Hussein Abdoh	##########			17	ar	us		1	ar	application work days error message appear	Negative	0	1	0
Google Play Store	feb79091-5071-4304-9bb1-2ab91ca88009	"The application is very bad, lots of comments."	أ. فوزية عبد العزيز تكروني	##########			0	ar	us		1	ar	application bad lot comment	Negative	1	0	0
Google Play Store	96baa895-e1cf-472e-bd40-a7a42d614041	The application is very bad, it does not work even after the latest update.	هيثم	##########			3	ar	us		1	ar	application bad work even late update	Negative	1	1	0
Google Play Store	3556c2a1-1fa0-4ef9-a296-cfe7866d2bc3	The application is currently bad. There is a problem that has been going on for approximately 74 hours and has not been resolved. There is an issue with logging into the application. Please try again later.	Abady Alymani	##########			28	ar	us		1	ar	application currently bad problem go approximately hours resolve issue log application please try late	Negative	1	1	0
Google Play Store	c707e109-9f28-4ef4-b6cc-341021b8168a	The application does not open, what's the problem?	ابوسامر ـ	##########			0	ar	us		1	ar	application open whats problem	Negative	0	1	0
Google Play Store	5adf332f-7288-483a-aa86-a1ad00ce5994	It is difficult to find something worse than this application in its field.	Abdullah	##########			0	ar	us		1	ar	difficult find something bad application field	Negative	1	0	0
Google Play Store	4102fd77-685d-4d99-85aa-75d130a9b0a4	The documents can only be entered from an iPhone and cannot accept them from Android phones	حرب 1	##########			0	ar	us		1	ar	document enter iphone accept android phone	Neutral	0	1	0
Google Play Store	2ca9bb92-789b-44d9-96c2-855de10b96cc	Unfortunately, after the update, it started freezing and crashing on its own.	Abdullah	##########			12	ar	us		1	ar	unfortunately update start freeze crash	Negative	0	1	1
Google Play Store	6e618de0-cb58-4f75-920e-d83747333edb	An application that is years behind its competitors, but they are terrible in customer service. They are unable to solve a simple problem. They have many justified complaints against them.	MESHAL	##########			6	ar	us		1	ar	application years behind competitors terrible customer service unable solve simple problem many justify complaints	Negative	1	1	0
Google Play Store	060efd2b-f4a6-4c66-9b78-ded819d7dabe	The application used to work well, but currently it only accepts working with Wi-Fi networks, despite the device having internet.	Marhoun 1	##########			0	ar	us		1	ar	application use work well currently accept work wifi network despite device internet	Neutral	0	1	0
Google Play Store	a328fa2d-c4fc-49b9-b112-ce5c962d7bf6	Very bad bank. Every Friday night after midnight, you cannot transfer money or make payments through the ATM or the app due to maintenance. Even when I tried to close my account, they kept stalling me for two weeks and I'm still waiting. I have filed a complaint with the central bank and know that there is a directive for account closure that should not exceed 48 hours. The main branch of Al-Swai…	sookar ff	##########			0	ar	us		1	ar	bad bank every friday night midnight transfer money make payments atm app due maintenance even try close account keep stall two weeks im still wait file complaint central bank know directive account closure exceed hours main branch alswaidi one security guard one employee one manager wait two hours bank easily transactions do email phone employee handle sometimes find atms time customer service t…	Negative	1	1	1
Google Play Store	54152b53-8227-47f6-822c-c072ef06ae8b	I hope you will see the solution of the application and the bank needs to be developed.	Ibrahim Senoussi	##########			0	ar	us		1	ar	hope see solution application bank need develop	Positive	1	0	0
Google Play Store	0ca58a08-8663-48b5-8b8b-ca74d1d1fd0d	My preferred bank is easy to deal with. I recommend it to everyone.	نجاة الحبشي	2023-03-09 09:49:00			0	ar	us		5	ar	prefer bank easy deal recommend everyone	Positive	1	0	0
Google Play Store	7b301ace-76e6-41a3-a4e3-020a1f55b21e	The worst application	Mustafa Abdel-latif	2023-03-07 08:53:00			0	ar	us		1	ar	bad application	Negative	1	0	0
Google Play Store	e9a7356a-d807-4b42-b7bf-c8b4edf4594f	A highly complex application, every now and then we have to register again.	mima amr0	##########			0	ar	us		2	ar	highly complex application every register	Neutral	1	0	0
Google Play Store	667148ca-eb49-45b0-9b88-13af3dbf4f2b	It became bad, I am connected to the home internet, but I can't access the program.	ALKING	##########			0	ar	us		1	ar	become bad connect home internet cant access program	Negative	1	1	0
Google Play Store	ac0770e5-9bad-4f16-9323-63360d39d28b	Very, very slow	Counselor Mohamed Ghanem	##########			0	ar	us		1	ar	slow	Negative	0	0	1
Google Play Store	e285690b-28f7-49ca-a95c-1a7105d36188	Very nice	RABEAS RABEAS	##########			0	ar	us		5	ar	nice	Positive	0	0	0
Google Play Store	fa284c58-0055-49d7-8d05-eb642daf83f8	The application is very excellent, but the option of (not objecting to debt conversion) in the application has been removed. Why? It used to facilitate a lot for the customers so that they don't have to go to the bank. Also, why can't we get a bank statement for the last three months? Some banks have done this and made it easier for customers. Thank you.	هاني عبدالله	##########			1	ar	us		4	ar	application excellent option object debt conversion application remove use facilitate lot customers dont go bank also cant get bank statement last three months bank do make easy customers thank	Negative	1	1	0
Google Play Store	a6f60aab-6d94-4373-8b35-02e516fcfa52	The program does not open, there is a problem.	A_H_A D	##########			0	ar	us		1	ar	program open problem	Negative	0	1	0
Google Play Store	bcb254ab-0ffe-416d-83b9-9c2b4853ce0d	Love ❤️ I love you I love you	عبود الدوسري	##########			0	ar	us		5	ar	love love love	Positive	0	0	0
Google Play Store	600a5b4b-9676-481b-ba53-06f50d085761	The application doesn't open. It says you are using a VPN, but I haven't even downloaded it!	safear hassawi	##########			0	ar	us		1	ar	application doesnt open say use vpn havent even download	Negative	0	1	0
Google Play Store	bb9e7bf7-7ca3-4df5-be0c-c4fb7a8edcba	It determines the internet that I connect to, and this is a problem.	عبد العزيز بابطين	##########			0	ar	us		1	ar	determine internet connect problem	Negative	0	1	0
Google Play Store	6638885b-bf39-4e8a-bece-58815def4434	The worst bank I have dealt with electronically.	Php Coder	##########			0	ar	us		1	ar	bad bank deal electronically	Negative	1	0	0
Google Play Store	d57307be-c31e-4004-8819-1e058aea50bf	Unfortunately, I cannot open a current account. And unfortunately, the toll-free number gives you incorrect solutions.	hesham alakeel	##########			0	ar	us		2	ar	unfortunately open current account unfortunately tollfree number give incorrect solutions	Negative	1	1	0
Google Play Store	54a4c202-3f27-4841-b03a-c3fa1ffd00b3	Bad service always. The device is not registered or authenticated, and it is the same device since last year.	أبوحسين090حاسب على عمرك الشمراني	2023-02-09 03:20:00			0	ar	us		1	ar	bad service always device register authenticate device since last year	Negative	1	1	0
Google Play Store	a5147cfc-3e50-4f43-b167-7f633b7a42af	Thank you.	حسين فرحان	##########			0	ar	us		5	ar	thank	Positive	0	0	0
Google Play Store	41381341-3400-4ae7-8baa-0d21e7f9aa9f	Very bad and also very repetitive.. The criticism is ongoing and repetitive.	Saud AL_sahly	##########			0	ar	us		1	ar	bad also repetitive criticism ongoing repetitive	Negative	1	0	1
Google Play Store	7682db24-d6ed-47a1-96a1-a34618984793	The application is not working.	H Kh	2023-02-01 07:45:00			0	ar	us		1	ar	application work	Negative	0	1	0
Google Play Store	17b36da6-0194-41be-961a-6dd4c8b7b8c4	The application is very bad and hangs a lot.	Moh	##########			0	ar	us		1	ar	application bad hang lot	Negative	1	0	1
Google Play Store	691fdde1-12b9-4d7f-b898-7ab9ecfbdcd3	I wish I had taken into consideration all the negative reviews, I wouldn't have opened an account with this bank. They froze my account after three days of opening it and my first transfer 🤕.	shoah Al absi	##########			0	ar	us		1	ar	wish take consideration negative review wouldnt open account bank freeze account three days open first transfer	Negative	1	1	0
Google Play Store	34361bfd-7aa2-48ae-b83d-a6bf82503062	The application is not suitable for a bank like an investment bank.	y.g h	##########			0	ar	us		1	ar	application suitable bank like investment bank	Negative	1	0	0
Google Play Store	46487bbc-75d9-4bbe-915e-d46587279251	Excellent services	الفارس ااا	##########			0	ar	us		5	ar	excellent service	Positive	0	0	0
Google Play Store	d56ff737-4d57-44d4-93b8-8acb90f1c44d	Very, very bad. When I tried to connect to the Wi-Fi network, it tells me that you are connected through a virtual network and I can only use mobile data to connect.	Jamelh ALY	##########			0	ar	us		1	ar	bad try connect wifi network tell connect virtual network use mobile data connect	Negative	1	0	0
Google Play Store	33775ad3-555f-47ae-bb06-858773cdd30c	Very excellent.	Nami N	##########			0	ar	us		5	ar	excellent	Positive	0	0	0
Google Play Store	1d8abc7a-aae2-40ca-bf57-28e931f650fe	amazing	MMTAM M1M2T3A4M	##########			0	ar	us		4	ar	amaze	Positive	0	0	0
Google Play Store	b088f878-26da-470d-8ec9-063dea680751	"The messages in the banking system will not be received until the end of the period."	red crash	##########			0	ar	us		1	ar	message bank system receive end period	Neutral	0	1	0
Google Play Store	9d785236-5a93-4114-bbfc-6d396b28aaf0	Bad and slow application.	thamer m	##########			0	ar	us		1	ar	bad slow application	Negative	1	0	1
Google Play Store	cd6f6edf-7c52-4251-b6c5-4485532b5113	Very, very, very failure the one who made the application for you as a gift and you're not paying any money for it.	زياد العنزي	##########			1	ar	us		1	ar	failure one make application gift youre pay money	Negative	0	1	0
Google Play Store	a55f036c-e2cb-479c-9f52-ed7fbcac01d2	Very bad. It is impossible for someone to access their account through the application. I have changed the password multiple times but it doesn't work.	ابو محمد	##########			2	ar	us		1	ar	bad impossible someone access account application change password multiple time doesnt work	Negative	1	1	0
Google Play Store	19560085-64cb-4ab5-b615-c4b84174da39	It's shameful that you see the comments, the technical support, and the quality they have, and you ignore them. Respect your customers, you may not respect them.	abn gdh	##########			0	ar	us		1	ar	shameful see comment technical support quality ignore respect customers may respect	Negative	1	0	0
Google Play Store	cd3a9cca-5161-47ee-af99-4a2a2e2ae3a3	A malicious and deceitful bank, may God be sufficient against every shareholder in this bank, they are just like the exploits of the STC (Saudi Telecom Company), robbing the citizens. Where is their integrity and fight against corruption? The Crown Prince is striving to empower the citizens, while these companies and banks are working on robbing the citizens with their smart fraud program. Above …	F-150 KSA	##########			0	ar	us		1	ar	malicious deceitful bank may god sufficient every shareholder bank like exploit stc saudi telecom company rob citizens integrity fight corruption crown prince strive empower citizens company bank work rob citizens smart fraud program lord beings allah beloved best avenger	Negative	1	0	0
Google Play Store	3c37c828-c31c-450f-8809-4dc7ad9224ca	nice	Thamer Aldobiny	##########			0	ar	us		1	ar	nice	Positive	0	0	0
Google Play Store	afe84c1e-0d0c-4f85-825d-89fb2abae2f2	High above all	علي ال يعلى	##########			0	ar	us		5	ar	high	Positive	0	0	0
Google Play Store	31a5a62c-97d3-438e-a154-7263dfbf475c	Simple, easy, and quick to start.	conn300	##########			0	ar	us		4	ar	simple easy quick start	Positive	0	0	0
Google Play Store	24853a98-cea3-4a29-a964-1114053410ce	Very, very excellent application.	حسين كريري	##########			1	ar	us		5	ar	excellent application	Positive	0	0	0
Google Play Store	95eece22-685f-431e-9c53-9727ede6ab67	Very, very, very bad and very much the worst.	قاسم مليباري ابو محمد Gasim Mlibari	##########			0	ar	us		1	ar	bad much bad	Negative	1	0	0
Google Play Store	cb4bc358-5c2f-450a-b374-bb3ba092f330	The application response is very slow, the logout icon is not active.	Saad Alshrarai	##########			3	ar	us		2	ar	application response slow logout icon active	Negative	0	0	1
Google Play Store	cb4bff8b-30f1-435f-916a-cd720435c427	Good	يوس عساس	##########			0	ar	us		5	ar	good	Positive	0	0	0
Google Play Store	e340adca-0349-4eb7-9fa9-9a50cc125ee4	The evaluation is for the bank, not the application. The worst bank I have dealt with, their motto of "customer always comes first" is a lie. They constantly renew my Visa card without my request and send it through Aramex without my knowledge. Aramex refused to deliver the shipment to my doorstep. The bank says, according to the shipper's report, that I refused to receive the card and it was ret…	عيسى الغفيلي	##########			0	ar	us		1	ar	evaluation bank application bad bank deal motto customer always come first lie constantly renew visa card without request send aramex without knowledge aramex refuse deliver shipment doorstep bank say accord shippers report refuse receive card return destroy want another one pay new fee clear case fraud send bad shipper send visa card without inform owner shipper refuse deliver bank take word min…	Negative	1	1	0
Google Play Store	23e7a8e3-a19f-4fa9-a79e-416881544ef6	Bad application and worse services. The customer service makes you feel like they are doing you a favor. I must cancel my account in this bank.	الشمراني asd	##########			0	ar	us		1	ar	bad application bad service customer service make feel like favor must cancel account bank	Negative	1	0	0
Google Play Store	737b0165-1c19-4c23-bc5f-ed5850c7aef5	It is not working; it is broken.	hnan Ali	##########			0	ar	us		1	ar	work break	Negative	0	1	0
Google Play Store	a44cea0d-3bc6-4f1c-bce7-a23da120fada	"I'm trying to log into the application and it says there has been a problem for a few days until now."	SALEH R	##########			1	ar	us		1	ar	im try log application say problem days	Negative	0	1	0
Google Play Store	0f6b1dae-42d5-47f1-bb81-5a7085b0e350	It has become bad.. Every time I try to do a task, it doesn't get executed.	فهد البدراني	##########			0	ar	us		1	ar	become bad every time try task doesnt get execute	Negative	1	1	0
Google Play Store	9d3af6a9-cc82-4491-b520-6c7de78a3062	"It is a very bad application that always hangs."	Ali Zaidi	##########			0	ar	us		5	ar	bad application always hang	Negative	1	0	1
Google Play Store	22960e99-02c7-4399-a691-1f9034d41e40	The application is bad, it has been frozen for 24 hours.	Adeb Faisal	##########			0	ar	us		1	ar	application bad freeze hours	Negative	1	0	1
Google Play Store	49905dfd-d4a9-4d78-a0a6-427a768ab611	Bad, bad, bad. You are unable to change and it does not work with you at all.	ليان القحطاني	##########			0	ar	us		1	ar	bad bad bad unable change work	Negative	1	1	0
Google Play Store	43d5c50f-f94e-4395-a2d4-f2835d572470	Very primitive.	bandr	##########			0	ar	us		2	ar	primitive	Negative	1	0	0
Google Play Store	ce632074-17b9-4279-b32d-fb94f09f9f01	The application is not working.	faisal alahmed	##########			0	ar	us		1	ar	application work	Negative	0	1	0
Google Play Store	c03a9948-607e-4a54-a294-60b246c058cf	Always there are problems in the login process, very poor.	habeb alshbib	##########			0	ar	us		2	ar	always problems login process poor	Negative	1	1	0
Google Play Store	bd843a42-1864-46c7-a1e1-4f487f4a1579	The biggest problem is that it does not connect to Wi-Fi. Meaning, if you travel, God help you, keep your mobile internet on it.	maher ali	##########			0	ar	us		1	ar	big problem connect wifi mean travel god help keep mobile internet	Negative	1	1	0
Google Play Store	1341a1e4-041b-4aab-9b9d-abbb8e777161	Every now and then, I will add a comment until your service at the online bank improves. It is very bad, it doesn't open, and if it does, it lags. This is as of 26-7-2021, and now we are on 15-6-2022 and nothing has changed in the bank. The service is even worse than before, and it is full of viruses. However, from now on, we hold you fully responsible if our money is stolen. Adding a new comment…	Mohammed Alghamdi	##########			0	ar	us		1	ar	every add comment service online bank improve bad doesnt open lag nothing change bank service even bad full viruses however hold fully responsible money steal add new comment nothing change service get bad access account even connect wifi application freeze lot believe join one efficient bank respect customers auction bank close	Negative	1	1	1
Google Play Store	7b882250-7089-47c8-b4cd-50b2f1933702	This is a browser and not an application!	A	##########			0	ar	us		1	ar	browser application	Negative	0	1	0
Google Play Store	01e5505c-a954-4e19-9e70-e9cf9066a5aa	There is no smart entry.	Sul Oma	##########			0	ar	us		4	ar	smart entry	Negative	0	0	0
Google Play Store	0a5a3cd0-e4da-462f-856f-d6582428072d	Hello.. It is one of the best banks I have.. But I have an issue, if the Wi-Fi network doesn't connect with me, it asks me to disconnect the Wi-Fi... meaning that I have to have internet through my mobile data.. knowing that it used to work for me 8 months ago...	عقوووبه 007	##########			0	ar	us		4	ar	hello one best bank issue wifi network doesnt connect ask disconnect wifi mean internet mobile data know use work months ago	Neutral	0	1	0
Google Play Store	378e3357-d548-4466-b697-2ace0008422a	"Very bad application. Other banks have smooth and fast applications except for this bank. It has been years and the same application."	Khalid Johani	##########			0	ar	us		1	ar	bad application bank smooth fast applications except bank years application	Negative	1	0	0
Google Play Store	c313aa37-ffa7-4b8f-93d7-aff6efa063b4	Not all banks accept it, some accept it and some don't. The application sometimes opens and sometimes doesn't.	Talal 7878	##########			1	ar	us		1	ar	bank accept accept dont application sometimes open sometimes doesnt	Neutral	0	1	0
Google Play Store	da1a1355-1a04-45a6-bc92-2b79076725bd	The worst application you can come across, an application that always raises your blood pressure, it is constantly freezing and won't open.	Abdulrahman	##########			3	ar	us		1	ar	bad application come across application always raise blood pressure constantly freeze wont open	Negative	1	1	1
Google Play Store	91fa6f83-8bc0-467c-b26f-8fe7653be6d4	Very bad	عزوز المسند	##########			0	ar	us		1	ar	bad	Negative	1	0	0
Google Play Store	0c80852c-50ed-4d5c-b0b6-3eed1aacfe46	The application is very bad. I will have to transfer my money to Al Ahli or Al Rajhi Bank. Their application is excellent and does not lag.	mohamed ali	##########			0	ar	us		1	ar	application bad transfer money al ahli al rajhi bank application excellent lag	Negative	1	1	0
Google Play Store	b8d66e82-6ced-4e24-a7ea-7b327321b059	The best bank in the Kingdom of Saudi Arabia.	عمر الظفيري	##########			0	ar	us		5	ar	best bank kingdom saudi arabia	Positive	0	0	0
Google Play Store	b222571e-5613-4fb6-a9ed-c895ced2613e	The application is bad, it hangs a lot, it is very heavy, and it disappoints you when you need it.	Pure Heart	##########			1	ar	us		1	ar	application bad hang lot heavy disappoint need	Negative	1	0	1
Google Play Store	81a9b37e-bb84-4443-b2cf-b272c8422866	Very bad application .. it crashes a lot. I hope it gets improved and its numerous problems get resolved.	Ali Alamry	##########			2	ar	us		1	ar	bad application crash lot hope get improve numerous problems get resolve	Negative	1	1	1
Google Play Store	3e30d040-c8a4-40d8-a96e-726b2493c7ab	Excellent	mohammed madkhali	##########			0	ar	us		5	ar	excellent	Positive	0	0	0
Google Play Store	3b8ce0ce-9669-4343-8d31-e60654909bcf	What's with this terrible app! Are its programmers from the Khamsat website? It doesn't work on either Wi-Fi or mobile data. It's unbelievable that you didn't test the app before releasing it on the store! Samsung Galaxy S22 Ultra.	Sulaiman Alsuhaimi	##########			1	ar	us		1	ar	whats terrible app programmers khamsat website doesnt work either wifi mobile data unbelievable didnt test app release store samsung galaxy ultra	Negative	1	1	0
Google Play Store	d9f58186-1745-4dd2-b522-dc60157a5f0d	Bad application, upon logging in it shows that you are connected through a private network and you cannot access your account.	المهاجر ماأنساك	##########			2	ar	us		1	ar	bad application upon log show connect private network access account	Negative	1	1	0
Google Play Store	22941ca9-3023-4b4a-b7f7-8ea7e05b292e	A the worst application, it freezes and embarrasses you when needed, and it doesn't open with Wi-Fi, you have to use data, and it asks for a VPN connection network.	ابراهيم محمد	##########			1	ar	us		1	ar	bad application freeze embarrass need doesnt open wifi use data ask vpn connection network	Negative	1	0	1
Google Play Store	b06a8609-74a1-4d4d-9746-e6eec715efd8	Very bad, slow.	AHMED Saud	##########			0	ar	us		1	ar	bad slow	Negative	1	0	1
Google Play Store	1d98b5b3-e516-4f63-a6a5-1b64fd9f9cfd	A very bad application... Thank God I didn't transfer my salary to this terrible bank.	FHD FD	##########			0	ar	us		1	ar	bad application thank god didnt transfer salary terrible bank	Negative	1	1	0
Google Play Store	cb639209-be56-483f-ae9c-88fc44fd5dbc	One of the worst banking applications in the world, always malfunctioning, and has not been updated or refreshed in years. Very outdated and with a poor management that does not pay attention to its customers' feedback.	Mazen M	##########			1	ar	us		1	ar	one bad bank applications world always malfunction update refresh years outdated poor management pay attention customers feedback	Negative	1	0	0
Google Play Store	bb59752b-3ffd-4514-abea-b8c653e4fe9e	There are many comments and it is necessary to delete them and reload them every process.	ibrahim mohammed	##########			0	ar	us		1	ar	many comment necessary delete reload every process	Neutral	0	1	0
Google Play Store	e0de88fc-57d5-4c64-b523-7b3b1dfefffe	By Allah, even though it has many stars, the Rajhi Bank application is the worst.. Learn from it.	عابر سبيل	##########			0	ar	us		1	ar	allah even though many star rajhi bank application bad learn	Negative	1	0	0
Google Play Store	e8e63aaa-7734-4bdb-b968-aadf9e6287a3	Constant updates are annoying.	dhmy albdrany	##########			0	ar	us		2	ar	constant update annoy	Negative	1	0	0
Google Play Store	abf02b85-7872-4cca-87f3-06ea31caf3b3	"A bad application and an endless feedback that does not meet the merchant's desires."	عبدالله	##########			0	ar	us		1	ar	bad application endless feedback meet merchants desire	Negative	1	0	1
Google Play Store	af0b221e-30d8-4653-9821-fdf295af6b54	The worst thing is that I am changing banks because of your application.	Jehad Alfaleh	##########			0	ar	us		1	ar	bad thing change bank application	Negative	1	0	0
Google Play Store	8ae3fc01-f4b9-4f6b-bda2-77676062789c	Very bad.	Abo Omar	##########			0	ar	us		1	ar	bad	Negative	1	0	0
Google Play Store	52faff85-aef6-481c-9997-fbd43e535d83	The application is bad. It often shows that there was an error in logging in, and overall it is inappropriate for it to be a reputable bank application.	حماد الصعيب	##########			3	ar	us		1	ar	application bad often show error log overall inappropriate reputable bank application	Negative	1	1	0
Google Play Store	20d0509b-3c3c-449f-955e-239444a1d019	How do I activate the night mode in the application?	RAYAN . BARRAK ™	##########			0	ar	us		1	ar	activate night mode application	Neutral	0	1	0
Google Play Store	48656ca0-2eee-466e-9c36-acd298533171	It is strange how this bank and its poor management operate. I don't understand why this bank does not develop this application and make it easier to use, as it is the interface with its customers and auditors and it generates annual profits in billions of riyals... Is it so difficult for you, bank management, to allocate only one million riyals to develop this application...?	KK KH	##########			1	ar	us		2	ar	strange bank poor management operate dont understand bank develop application make easy use interface customers auditors generate annual profit billions riyals difficult bank management allocate one million riyals develop application	Negative	1	0	0
Google Play Store	df04ec62-57ac-4b66-8f9f-ba5932873474	The application is outdated and bad, as if it were from 2013 applications. I am ready to make an application for you without any cost.	ALI GM	##########			0	ar	us		1	ar	application outdated bad applications ready make application without cost	Negative	1	0	0
Google Play Store	d9ad8e29-c58d-48fd-a052-8652bb173601	Very bad, it won't open if you are connected to Wi-Fi.	tawfiq alabdaly	##########			0	ar	us		1	ar	bad wont open connect wifi	Negative	1	1	0
Google Play Store	083015a1-387a-446e-9b0f-c7a80f160593	I have been using your application for a year, but I deleted it because of the frequent glitches. Even your website is glitchy. Do you have any intention to solve these problems? Let us know so we can transfer our accounts.	A A	##########			0	ar	us		1	ar	use application year delete frequent glitches even website glitchy intention solve problems let us know transfer account	Negative	0	1	1
Google Play Store	5f4dfb1e-a05b-477d-8ceb-c81d8179045d	The program raises the blood pressure when I connect to Wi-Fi at home. It says connected to a virtual network. Please fix the problem.	J.K.D	##########			3	ar	us		1	ar	program raise blood pressure connect wifi home say connect virtual network please fix problem	Negative	1	1	0
Google Play Store	cfd4ec7c-950d-44c6-b130-ff30ea62c723	Its services are limited and it is exhausting to use, and if it closes, it does not reopen.	ريان فيصل	##########			0	ar	us		1	ar	service limit exhaust use close reopen	Negative	0	1	0
Google Play Store	f99a69db-15d1-4a01-a386-947f31fc5095	A bad application that is not suitable for the excellent services of the bank. Many mistakes and countless malfunctions. It needs the development of a more efficient and reliable application.	Bandar Soliman	##########			2	ar	us		2	ar	bad application suitable excellent service bank many mistake countless malfunction need development efficient reliable application	Negative	1	1	0
Google Play Store	5d97acb5-b575-4c11-8861-0c173c5fc59e	The program is the worst, it keeps freezing and is very slow.	محمد Gilbert	##########			0	ar	us		1	ar	program bad keep freeze slow	Negative	1	0	1
Google Play Store	e5ba0892-4330-4363-b601-8d1967a54345	Bad	أپوترگي	##########			1	ar	us		2	ar	bad	Neutral	1	0	0
Google Play Store	6fb0649b-e94d-4e94-84b7-4003883e6c5a	A very excellent and easy-to-use application that serves you wherever you are sitting.	‪badr al_shadadi (‫البدر‬‎)‬‏	##########			1	ar	us		5	ar	excellent easytouse application serve wherever sit	Positive	0	0	0
Google Play Store	312d4587-b7ab-4622-850a-c55351fa0d52	Unfortunately, there is a problem with the application if you enter from a Wi-Fi network.	عسيري	##########			0	ar	us		2	ar	unfortunately problem application enter wifi network	Negative	0	1	0
Google Play Store	18799048-b1e4-4a3a-b511-331ca50c5da7	Very bad application, it hangs and does not open on Wi-Fi network. Actually, I'm starting to think about closing my account in this bank because of this application. Also, there are frequent maintenance works on it and transfers are sometimes stopped, which can cause great inconvenience to the customer.	سطام الحزيمي	##########			23	ar	us		1	ar	bad application hang open wifi network actually im start think close account bank application also frequent maintenance work transfer sometimes stop cause great inconvenience customer	Negative	1	1	1
Google Play Store	907c8493-a7a3-4aba-af06-1c7608183701	Very good.	NAIF الغزواني	##########			0	ar	us		5	ar	good	Positive	0	0	0
Google Play Store	fc507132-593b-475c-a444-883d794db29f	The worst bank I have ever tried! The website keeps freezing, they told me to log in through the app. I downloaded the app and tried logging in, but it still freezes. Hahahaha! And their customer service is useless, zero assistance.	شادن محمد	##########			3	ar	us		1	ar	bad bank ever try website keep freeze tell log app download app try log still freeze hahahaha customer service useless zero assistance	Negative	1	0	1
Google Play Store	9e3b2c5d-5188-4c53-b5cd-f5fa37552746	The application is bad and freezes a lot.	عبدالاله السلمي	##########			0	ar	us		1	ar	application bad freeze lot	Negative	1	0	1
Google Play Store	21736f03-7b79-4d02-9a46-6f4b0ae62ec4	The latest update is very bad. You can't pay your bills or know your previous bills. You also can't recharge your phone like before. It has transferred to another bank.	جدة -	##########			0	ar	us		1	ar	late update bad cant pay bill know previous bill also cant recharge phone like transfer another bank	Negative	1	1	0
Google Play Store	41c8ba3e-8e50-4e5b-bc72-23b4e5fcf938	Is there anything less than a star? The application is malfunctioning most of the time!	Abdullah alsharida	##########			1	ar	us		1	ar	anything less star application malfunction time	Negative	1	1	0
Google Play Store	bff7007b-01e7-4a57-a353-1bab2765734a	The worst, worst, worst banking application.	emad saadi	##########			0	ar	us		1	ar	bad bad bad bank application	Negative	1	0	0
Google Play Store	c7d431f2-ec69-44c8-b3c5-19a92cd61bc0	This application is backward, stupid, and outdated. The whole bank is a mess, even their IT is pathetic. They see people complaining about the application for over three years, and they have no intention of making any changes or responding.	R K	##########			1	ar	us		1	ar	application backward stupid outdated whole bank mess even pathetic see people complain application three years intention make change respond	Negative	1	0	0
Google Play Store	57668f3e-8373-4bf5-8038-227e343ab127	Excellent, we thank those in charge.	ff fhad	##########			0	ar	us		5	ar	excellent thank charge	Positive	0	0	0
Google Play Store	05519ec8-0475-4b7c-a2d1-524473215c60	He always crashes and is not like before, and sometimes it kicks me out of the application.	Hussien Alshekh	##########			0	ar	us		1	ar	always crash like sometimes kick application	Negative	0	1	0
Google Play Store	71352841-c428-43fe-8365-e51b5629b3f7	It has been more than a week and he has not contacted me + a very bad program in an unnatural way.	محمد عبدالعزيز	##########			2	ar	us		1	ar	week contact bad program unnatural way	Negative	1	0	0
Google Play Store	4e2b3d50-c124-4713-bed7-92924fad8fce	It has been several months and the program keeps freezing and crashing, and there is no response from technical support.	ALSME7ANY	##########			0	ar	us		1	ar	several months program keep freeze crash response technical support	Negative	0	1	1
Google Play Store	3b4c8b60-8412-4831-a302-b77f96f229e0	The application is bad, it hangs, and when connecting to the network, it shows an insecure connection and does not open, and purchases are not completed.	KHALID MOHAMMED	##########			3	ar	us		1	ar	application bad hang connect network show insecure connection open purchase complete	Negative	1	1	1
Google Play Store	f383f4b5-0a94-4713-bf6d-5d20602f551f	Very very bad and slow application.. doesn't deserve half a star.	KH NHA	##########			0	ar	us		1	ar	bad slow application doesnt deserve half star	Negative	1	0	1
Google Play Store	311e22a0-8164-46ee-90ab-455ac436d848	He criticizes a lot... and he's bad.	Haytham ashwi	##########			0	ar	us		1	ar	criticize lot hes bad	Negative	1	0	0
Google Play Store	788fda2f-5f37-4f75-abfe-482608b04bdd	Bad, needs improvement.	Adel Al Amoudi	##########			0	ar	us		1	ar	bad need improvement	Negative	1	0	0
Google Play Store	c1e2572a-e46f-4fe4-9848-b7ac46e40064	"The worst bank I have ever experienced, other banks have better applications and they are still behind."	AZ ABUTALEB	##########			0	ar	us		1	ar	bad bank ever experience bank good applications still behind	Negative	1	0	0
Google Play Store	69578914-655a-40f9-9dec-bd7aebd91df1	It needs development.	AZIZ	##########			0	ar	us		1	ar	need development	Neutral	1	0	0
Google Play Store	078e68b3-7a56-4e8e-84eb-475706fa53bf	It's been 4 hours and I'm frustrated trying to get my bank account number 😡😡😡😡😡	ShooQ Mohamed	2022-09-04 04:46:00			0	ar	us		1	ar	hours im frustrate try get bank account number	Negative	1	0	0
Google Play Store	5da74220-4c14-4ceb-8a2b-85f4b3ee3af5	He is commenting on the Android system, saying that it is better to access a bank website from a browser.	saad saaed saaed	2022-09-02 03:58:00			0	ar	us		1	ar	comment android system say good access bank website browser	Neutral	1	0	0
Google Play Store	a2326e44-6455-41b5-aa70-b852ef2ddaba	They don't give us any money. 🚶🏾	اابراهيم الدوسري	##########			0	ar	us		5	ar	dont give us money	Negative	1	0	0
Google Play Store	13105e8f-d364-4f43-8bc7-156d632efb34	Trash in every sense of the word.	Abdullah H	##########			0	ar	us		1	ar	trash every sense word	Negative	1	0	0
Google Play Store	89529167-26ff-4573-aa66-eed16e113c02	Excellent	ABDELKARIM GEBRIL	##########			0	ar	us		5	ar	excellent	Positive	0	0	0
Google Play Store	823ad3bf-62d8-4ed4-af5f-985c30cb582e	The application hangs.	Yassin Salim	##########			0	ar	us		1	ar	application hang	Negative	0	0	1
Google Play Store	dfa542f6-1a42-4eea-b820-13cffc632e26	When entering from Wi-Fi network, a message appears stating that you seem to be connected through a private virtual network and cannot access the application except through mobile data. The program has been deleted and the data has been erased without any benefit. Huawei P20 Pro mobile phone with Android version 12.	Abu Moath	##########			47	ar	us		1	ar	enter wifi network message appear state seem connect private virtual network access application except mobile data program delete data erase without benefit huawei p pro mobile phone android version	Negative	0	1	0
Google Play Store	6fb9c8bc-d8c7-44ef-b56d-86fbcff8b03d	The application is very, very bad. I try to access my account and I receive a message saying that I am using a VPN (Virtual Private Network) and there is no VPN program. I had to format my phone and the same problem persisted. I called customer service without any benefit. The bank is very bad and I advise not to deal with them. Their services are extremely bad. 😪	Abdullah Hatrash	##########			9	ar	us		1	ar	application bad try access account receive message say use vpn virtual private network vpn program format phone problem persist call customer service without benefit bank bad advise deal service extremely bad	Negative	1	1	0
Google Play Store	7168d9ac-090e-42c2-8895-c3098f45a122	Beautiful	أبو البراء الصعب	##########			0	ar	us		5	ar	beautiful	Positive	0	0	0
Google Play Store	ec15ead3-e507-444c-8176-ce933ef7adcc	The application is always crashing, especially when adding or recovering amounts on the travel card. It used to be very good in the past, but now it has become extremely bad, as it disables your banking transactions.	محمد السعد	##########			1	ar	us		1	ar	application always crash especially add recover amount travel card use good past become extremely bad disable bank transactions	Negative	1	1	0
Google Play Store	4ea25d63-4559-4bf6-bb98-4acd8d8a24e7	Excellent	برلنتي عراقي	##########			0	ar	us		5	ar	excellent	Positive	0	0	0
Google Play Store	8d608cd5-ec75-409d-9b59-11133c43a933	Very well, they fixed it just like normal people. When we entered the cards, the app froze and we ended up exiting it completely.	أبوشادي	##########			0	ar	us		1	ar	well fix like normal people enter card app freeze end exit completely	Neutral	0	0	1
Google Play Store	7c3ddea4-66e3-44d3-8740-36b311a2166a	It is considered one of the weakest banks, with very few branches and also very few ATM machines. (It deserves a ⭐ star).	محمــAlmalkiــد KSA	##########			21	ar	us		1	ar	consider one weak bank branch also atm machine deserve star	Negative	1	0	0
Google Play Store	67c241c2-7869-4fa7-8655-90aa3e0897ee	After the update, the problem was not solved. When I press "add credit" to a travel card, the application hangs and does not respond, then it automatically closes.	ماجد الثبيتي	##########			21	ar	us		1	ar	update problem solve press add credit travel card application hang respond automatically close	Negative	0	1	1
Google Play Store	c601a98d-e4b9-49de-8179-151e9b60ba02	The worst banking application in the world.	Reshoo	##########			0	ar	us		1	ar	bad bank application world	Negative	1	0	0
Google Play Store	4f406f77-334f-449d-b10b-ddbc1ec25b0f	The best banking application in the world in 2023.	Faisal Aleissa	##########			1	ar	us		1	ar	best bank application world	Positive	0	0	0
Google Play Store	72d4d8c0-4f52-430f-936c-8d31ce525193	The application is not bad, but it needs improvement. For example, it needs to be faster and have additional services in the application, such as MoneyGram. In short, it needs development. Thank you.	ناصر محمد	##########			1	ar	us		3	ar	application bad need improvement example need fast additional service application moneygram short need development thank	Positive	1	0	0
Google Play Store	8fd0b99f-abf8-4533-834c-198d56b6669f	Comment, comment, comment and close forcefully.	I H	##########			0	ar	us		1	ar	comment comment comment close forcefully	Neutral	1	0	1
Google Play Store	3f81072e-3124-403a-a2ef-c57c5f68ee7a	Very bad and it's so frustrating to the point that I stopped using it and switched to my second account.	Fαяis x	##########			0	ar	us		1	ar	bad frustrate point stop use switch second account	Negative	1	1	0
Google Play Store	715bd71f-6786-47ca-b5bb-a16dbb83552a	A very bad application that has been hanging for over a year and does not process transfer requests for the travel card. I do not recommend it at all.	Ewr Gyt	##########			2	ar	us		1	ar	bad application hang year process transfer request travel card recommend	Negative	1	1	1
Google Play Store	65508efb-a4ea-48e0-8be5-794e39148be7	Bad application, it doesn't even deserve one star. Every time I open the application, it connects me to a virtual private network. What kind of virtual network is this in your lousy application? My phone doesn't have anything.	Ngin Neo	##########			0	ar	us		1	ar	bad application doesnt even deserve one star every time open application connect virtual private network kind virtual network lousy application phone doesnt anything	Negative	1	0	0
Google Play Store	622d656c-e1c0-4bf8-9d7c-8d48ad3b2b6d	Thank God I didn't stay with them for two months, and it turns out you owe me the name of a bank.	alhilal easy	##########			1	ar	us		1	ar	thank god didnt stay two months turn owe name bank	Negative	1	1	0
Google Play Store	3f170dee-8ad0-44ec-87e0-2a7fe9000425	The application is very very bad.. It crashes a lot and is exhausting. Please solve the problem quickly. I contacted you and you mentioned that the latest update would fix the issue.. but unfortunately, the problem continues and it doesn't seem like there is a near solution.	ali almarri	##########			59	ar	us		1	ar	application bad crash lot exhaust please solve problem quickly contact mention late update would fix issue unfortunately problem continue doesnt seem like near solution	Negative	1	1	0
Google Play Store	0929c67c-0ed8-407b-b851-bc459f1890ba	Unfortunately, the app is very bad and does not deserve the name of the bank.	royal sun	##########			0	ar	us		1	ar	unfortunately app bad deserve name bank	Negative	1	0	0
Google Play Store	b65f4f13-bad4-4a27-8073-f3d193c98d1d	Unfortunately, it used to be one of the best banking applications ever, but now it frequently hangs and does not respond. It also forces you to connect through mobile data and rejects using Wi-Fi. What if my phone is disconnected and I need to access my account? For security reasons, you can only log in through a message that includes the bank's secret code. Lately, it has been rapidly declining …	ثامر العنزي	##########			0	ar	us		1	ar	unfortunately use one best bank applications ever frequently hang respond also force connect mobile data reject use wifi phone disconnect need access account security reason log message include bank secret code lately rapidly decline term quality would great could review many feature otherwise customers look another excellent service provider	Negative	1	1	1
Google Play Store	978702b3-7354-422a-9087-3ddf87a6472d	A very bad bank, their application is weak and not useful. I do not advise anyone to deal with this bank.	A H	##########			1	ar	us		1	ar	bad bank application weak useful advise anyone deal bank	Negative	1	0	0
Google Play Store	70035878-6486-478c-82d7-75c583f1fa99	A lot of stars for the worst bank application! It's slow, it stops and freezes, and it's strange that it has been like this for a long time. Is it possible that they're not concerned to this extent?!	صقر بن ابراهيم	##########			0	ar	us		1	ar	lot star bad bank application slow stop freeze strange like long time possible theyre concern extent	Negative	1	0	1
Google Play Store	910d4357-91e7-4f9f-bb17-f544884077e8	"The worst application claims that I am accessing it through a proxy, and this is not true. I am going to cancel your subscription."	moafaq al harbi	##########			0	ar	us		1	ar	bad application claim access proxy true go cancel subscription	Negative	1	1	0
Google Play Store	f747059f-e3ef-49a4-a16f-da296f1f079c	The update went from bad to worse.	Nader Ayoub	##########			0	ar	us		1	ar	update go bad bad	Negative	1	0	0
Google Play Store	1dba96fb-b865-47af-9952-ea77b9edc71d	The application is bad, logging in is difficult, transferring is difficult, and there are too many attempts in everything. Actually, most likely, I will cancel dealing with you due to the poor performance of your application.	عامر العامري	##########			22	ar	us		1	ar	application bad log difficult transfer difficult many attempt everything actually likely cancel deal due poor performance application	Negative	1	1	0
Google Play Store	a9bc83f8-4699-410f-bcee-673e3e4c99a6	The application crashes very frequently. It is very bad.	Turki Abdo	##########			0	ar	us		1	ar	application crash frequently bad	Negative	1	1	0
Google Play Store	121c8530-e25a-4ffc-9230-b3b69940db2c	The application has a frozen period.	ابو حذيفة	##########			0	ar	us		1	ar	application freeze period	Neutral	1	0	1
Google Play Store	270b8a68-ab88-4339-8861-e488dbea1b18	The worst application in life, there's nothing worse than this. I tried uninstalling and reinstalling it several times, but it's not of any use. It refuses to open. 😡	د.غادة سيد	##########			0	ar	us		1	ar	bad application life theres nothing bad try uninstalling reinstall several time use refuse open	Negative	1	1	0
Google Play Store	f6892728-e3b4-4d32-86c3-da9b4ccacbf9	The application has stopped working for me completely.	Maged Abu Jewad	##########			0	ar	us		1	ar	application stop work completely	Negative	0	1	0
Google Play Store	70ee840a-a0fc-4cbb-86db-244b66c260cd	The application has frustrated me a lot (it freezes).	T Shwteer	2022-08-09 08:44:00			0	ar	us		1	ar	application frustrate lot freeze	Negative	1	0	1
Google Play Store	9fe85bee-6bb9-4d50-a50e-36cf420c6670	What's wrong with the application? It was working and now it's telling me that I'm connected to a private network. But the private network is in my own home, why is it causing trouble like this? We can't access and handle our affairs.	Hussain Hanhnha	2022-08-09 08:31:00			0	ar	us		1	ar	whats wrong application work tell im connect private network private network home cause trouble like cant access handle affairs	Negative	0	1	0
Google Play Store	0b7899d6-3c0e-4f7c-b91c-8d8ef7bb4c25	A very very wonderful application.	ابو عايشه	2022-08-09 07:11:00			0	ar	us		5	ar	wonderful application	Positive	0	0	0
Google Play Store	d8e641dd-22c7-4261-8a55-20d4e2a96fc0	Bad application and it always crashes.	Khaled Talbi	##########			0	ar	us		1	ar	bad application always crash	Negative	1	1	0
Google Play Store	d4caa309-9d4b-4292-8424-e6d8dd130b12	Hello and peace be upon you. The application has been non-functional for a long time and does not accept the travel card despite its importance. Please address customer complaints and solve the problem, especially since the bank is a leader in this wonderful card. Thank you.	مشعل الشايقي	##########			9	ar	us		1	ar	hello peace upon application nonfunctional long time accept travel card despite importance please address customer complaints solve problem especially since bank leader wonderful card thank	Negative	0	1	1
Google Play Store	e5a07ab3-f9b4-4a42-a6e7-be6dfb0c65e9	One million greetings to the management of the best applications for Saudi banks.	Commander Bradley	##########			1	ar	us		5	ar	one million greetings management best applications saudi bank	Positive	0	0	0
Google Play Store	7b6c6e5c-98a6-4ced-81dd-b2e0e73844dd	Unfortunately, it is the worst application among banks, and unfortunately, it does not care about its customers or their service. This application is a perfect example of years passing by, and the situation going from bad to worse, frankly.	الشاعر محمدالسعدالحربي	##########			0	ar	us		1	ar	unfortunately bad application among bank unfortunately care customers service application perfect example years pass situation go bad bad frankly	Negative	1	0	0
Google Play Store	05ef3a94-2b79-470c-905f-dbf3fa92206b	The application is very bad. The travel card options are broken and have not been working for months. The application and website freeze when trying to add money or make transactions. Because of these issues and the website's lack of response, I have switched to another bank.	Shatha saleh	##########			1	ar	us		1	ar	application bad travel card options break work months application website freeze try add money make transactions issue websites lack response switch another bank	Negative	1	1	1
Google Play Store	c485d061-f162-457e-958e-06e6275516fe	Worse than bad, always frustrated, 😡	Dodda G	##########			0	ar	us		1	ar	bad bad always frustrate	Negative	1	0	0
Google Play Store	2096867d-186b-4a9f-98bd-5e8cd4be6f02	Very bad app and many complaints, especially regarding the traveler card.	Prince Y	2022-08-06 00:17:00			0	ar	us		1	ar	bad app many complaints especially regard traveler card	Negative	1	1	0
Google Play Store	2ff3c42a-0b59-48a3-86cf-fd81fbf7a3f3	Always remember to hold on to your traveler's card during currency exchange.	Ahmad ALharbi	##########			0	ar	us		1	ar	always remember hold travelers card currency exchange	Neutral	0	1	0
Google Play Store	7d316687-26de-441c-aa53-1b54879cd335	The application freezes a lot and the color is dazzling and uncomfortable for the eye.	زمان الصمت (‪Hush‬‏)	##########			0	ar	us		1	ar	application freeze lot color dazzle uncomfortable eye	Negative	1	0	1
Google Play Store	8d1d9dd6-02f7-4a97-942d-f0002a98ca72	Splendor/beauty	خالد الدهيش	2022-08-04 00:46:00			0	ar	us		5	ar	splendorbeauty	Positive	1	0	0
Google Play Store	bc474781-27ef-4029-8111-b7d324c16f59	Very bad to the highest degree.	‪m.alhassa (mo7md7aider)‬‏	2022-08-03 01:35:00			0	ar	us		1	ar	bad high degree	Negative	1	0	0
Google Play Store	e63fa75f-b01b-4a06-9e0c-b132d5fb245b	The application is very bad to the extent that it freezes, crashes, and doesn't respond to any action involving the passport. It caused us trouble during our trip. The old version was excellent, but now everyone complains about it. It's the worst and it ruins your travel plans. I switched my account to Al Rajhi Bank because of it, and I got a stolen passport. It gave me a headache, but thank God.	Naser Karshi	##########			0	ar	us		1	ar	application bad extent freeze crash doesnt respond action involve passport cause us trouble trip old version excellent everyone complain bad ruin travel plan switch account al rajhi bank get steal passport give headache thank god	Negative	1	1	1
Google Play Store	a071c915-2210-496b-89cf-ae4e3b5f9f21	The application freezes and I have a friend who has hearing problems (deaf) and now the bank no longer sends the password as an SMS, instead it has become a phone call and the man cannot hear the person next to him. How do you expect him to know the password, oh investment bank? Fear God, there are disabled individuals suffering in this world.	abunowaf	##########			0	ar	us		1	ar	application freeze friend hear problems deaf bank long send password sms instead become phone call man hear person next expect know password oh investment bank fear god disable individuals suffer world	Negative	1	1	1
Google Play Store	6ce50ef0-1ae6-4811-aec8-4b568969d043	Very slow and lagging application, especially when adding an amount in the traveler card currencies. It's full of problems. The bank is required to review this version and create a smooth and fast application.	Abu Hassan	2022-08-02 05:26:00			7	ar	us		1	ar	slow lag application especially add amount traveler card currencies full problems bank require review version create smooth fast application	Negative	1	0	1
Google Play Store	17787ada-0886-4186-82f9-2bc7f6eec9a7	Excellent, the best bank despite my mobility between all banks.	abo eyad	2022-08-02 04:21:00			1	ar	us		5	ar	excellent best bank despite mobility bank	Positive	0	0	0
Google Play Store	78707949-1faa-4c53-ab05-4b6218a0ffb1	The program is very, very bad. It is worse than a bank program in Saudi Arabia. In truth, it lags and crashes out of the application. 👎👎👎👎👎👎👎👎	Saleh AlAswad	##########			0	ar	us		1	ar	program bad bad bank program saudi arabia truth lag crash application	Negative	1	1	1
Google Play Store	e4f15800-3bd8-4f1b-acb0-98458a541fe0	Alhamdulillah, today I managed to get away from them. I finally left this very bad bank.	Thunder way	##########			0	ar	us		1	ar	alhamdulillah today manage get away finally leave bad bank	Positive	1	0	0
Google Play Store	2de8a42f-53bf-4a03-a905-d2199d55fc00	We wish to add the option of changing the color in the app, as the yellow color strains the eye.	Dream Life	##########			2	ar	us		2	ar	wish add option change color app yellow color strain eye	Neutral	1	1	0
Google Play Store	7a79ab91-294d-449b-b4f8-5b0ed743175a	Very bad.	Nasser 2017	##########			0	ar	us		1	ar	bad	Negative	1	0	0
Google Play Store	5ecadec0-c8a5-49b7-991b-74d9b264d590	It is not worth it and not even a star.	وداد الحربي	##########			0	ar	us		1	ar	worth even star	Negative	0	0	0
Google Play Store	be1f61b5-f2fb-4e1b-97b0-e95f8b1bd7a5	The programs do not convert currencies on a travel card.	محمد الحربي	2022-08-01 00:53:00			0	ar	us		1	ar	program convert currencies travel card	Neutral	0	1	0
Google Play Store	c25b46c6-d70b-4e4e-84e9-00514e458744	The application keeps freezing constantly and needs an immediate update by the developer.	Fahad Alenezi	##########			0	ar	us		1	ar	application keep freeze constantly need immediate update developer	Negative	0	0	1
Google Play Store	8661ffae-dc00-4e45-b5f5-fbabf1b03b19	Good... but sometimes it gets stuck.	Soso Zahrani	##########			0	ar	us		3	ar	good sometimes get stick	Neutral	1	0	1
Google Play Store	cc1cabcc-edf3-4443-8bea-38bd9baaa7d1	The worst banking applications ever + constant criticism of the application and forced closure of it.	Majed Bsooki	##########			0	ar	us		1	ar	bad bank applications ever constant criticism application force closure	Negative	1	0	0
Google Play Store	9f7081a5-c069-4e31-b9a9-19cb7315e0b6	Very nice	عبده الثميلي	##########			0	ar	us		5	ar	nice	Positive	0	0	0
Google Play Store	dc7ded97-5859-454a-aa86-a5901c9f9355	I am sad and always held back, especially with a passport.	yahya alsadi	##########			0	ar	us		1	ar	sad always hold back especially passport	Negative	1	0	0
Google Play Store	b796e94c-0dab-4b31-85f3-7d4dd6e32d63	The application has become worse than bad, especially with Android devices. It used to be one of the best banking applications, but now it is the worst application on Earth. I don't know why they don't fix it as soon as possible, or maybe they are waiting for customers to look for other banks.	محمد عبدالعزيز	##########			0	ar	us		1	ar	application become bad bad especially android devices use one best bank applications bad application earth dont know dont fix soon possible maybe wait customers look bank	Negative	1	0	0
Google Play Store	a79cf3e9-6b05-4c5a-82a8-e0bff0026bb8	The application crashes constantly, forcing you to exit and start over again repeatedly.	salman alsulimi	##########			0	ar	us		1	ar	application crash constantly force exit start repeatedly	Negative	0	1	1
Google Play Store	cdddbfdc-791a-40c2-886b-20c781d1dd58	The application is freezing.	abdullah ba-abdullah	##########			0	ar	us		1	ar	application freeze	Negative	1	0	1
Google Play Store	7d2196cb-2bd8-4867-9898-9998cd3a8852	The worst application	A.S.G	##########			0	ar	us		1	ar	bad application	Negative	1	0	0
Google Play Store	94c7e2e9-c3c0-4464-b4bf-2894a7b892dc	Peace be upon you and the mercy and blessings of Allah, brothers. It's unbelievable how heavy the application has become; it's very slow and not functioning properly. We kindly request that you address this issue.	طارق الكناني	##########			0	ar	us		1	ar	peace upon mercy blessings allah brothers unbelievable heavy application become slow function properly kindly request address issue	Negative	0	0	1
Google Play Store	0a531500-e14f-42cf-9b2c-676ff6dd50ee	The application has become bad, especially the passport services, it freezes and closes the program. I hope to solve this problem urgently. Thank you. My device is Samsung Galaxy S10+.	‪Qanoo3 (‫قنوع‬‎)‬‏	##########			0	ar	us		1	ar	application become bad especially passport service freeze close program hope solve problem urgently thank device samsung galaxy	Negative	1	1	1
Google Play Store	2fa4c8ea-258f-41df-918b-417a3cbffffd	The worst application is the Saudi Investment Bank's app. The problem lies in the level of technical transactions. I have contacted them and the employee said it's not their fault, your phone is damaged. Our application has no problem. However, I have been experiencing difficulties logging into the program and incorrect balance information consistently. And don't even get me started on the travel…	Abdulrahman Serafi	##########			1	ar	us		1	ar	bad application saudi investment bank app problem lie level technical transactions contact employee say fault phone damage application problem however experience difficulties log program incorrect balance information consistently dont even get start travel card whole story whenever try access app freeze automatically exit	Negative	1	1	1
Google Play Store	3d4fe386-ef63-4034-a13c-2cc9ed9cba92	The application is not working. We hope for a solution to the problem.	Ali Al Hafini	##########			0	ar	us		1	ar	application work hope solution problem	Negative	0	1	0
Google Play Store	1fb2cdc5-4ee7-4028-8f6c-fcb9fb15ad43	He hangs a lot and is slow... The problem is that despite the previous comments, there is no response from the developers. Unfortunately, the developers are ignoring this complaint as we haven't seen anyone responding to us, and the application is very, very bad.	muaid AlSawad	##########			0	ar	us		1	ar	hang lot slow problem despite previous comment response developers unfortunately developers ignore complaint havent see anyone respond us application bad	Negative	1	0	1
Google Play Store	b4ebee9f-aa68-4690-a240-ecaf7ccb4cc2	His comment has been frequent in recent times.	ح ص	##########			0	ar	us		1	ar	comment frequent recent time	Neutral	0	1	0
Google Play Store	93868452-8f51-42b9-9be0-0df8ff299ca6	He hangs on a lot and brings up an issue that has been going on for more than several months and there is no solution to it!	IBRA H	##########			0	ar	us		1	ar	hang lot bring issue go several months solution	Negative	0	0	1
Google Play Store	802c98dd-96c5-4c34-938b-8f8c9991165e	Good bank worthy of trying to open an account.	D.mohammd Alzahrani	##########			0	ar	us		3	ar	good bank worthy try open account	Positive	0	0	0
Google Play Store	661ef0d8-f793-4cda-bdb9-a7525ede348c	The youth have reported that the system is crashing and there is no update. The application freezes on the Android system, and currently I am unable to adjust anything in it. If the freezing continues, it means canceling the card and filing a complaint with your bank. Unfortunately, when the time to travel came and I tried to use it, it was frozen in Bank Al-Bilad, Al-Rajhi, and Al-Inma. I tried …	Nabil AL.Dkhil	##########			0	ar	us		1	ar	youth report system crash update application freeze android system currently unable adjust anything freeze continue mean cancel card file complaint bank unfortunately time travel come try use freeze bank albilad alrajhi alinma try work fine contact quickly even meeem card freeze surprise pay money issue promote provide technical support application	Negative	0	1	1
Google Play Store	035f09b2-6a7f-4e47-bb27-c6354181e560	A very bad application .. I have been trying to perform any operation for three hours and it keeps freezing and kicking me out.	ابو عمار	##########			0	ar	us		1	ar	bad application try perform operation three hours keep freeze kick	Negative	1	1	1
Google Play Store	e3b4b3e4-0ce0-422a-96ff-04c56f2f34dc	Bad and unhelpful, the bank does not review customer ratings and is not interested in their problems. This indicates a major problem with the bank in caring for its customers. The upper management at the bank is asleep and indifferent despite customer dissatisfaction. I do not recommend anyone to deal with the bank at all, and I am currently in the process of closing my accounts with them.	راجي ربه	##########			0	ar	us		1	ar	bad unhelpful bank review customer ratings interest problems indicate major problem bank care customers upper management bank asleep indifferent despite customer dissatisfaction recommend anyone deal bank currently process close account	Negative	1	0	0
Google Play Store	737d6893-5916-4a5c-8c83-97da396a0a35	It's a bad application, people. I've been trying to reach out to them on Twitter for a year now and tell them about the application, but it's like calling into emptiness.	محمد الحربي	##########			0	ar	us		1	ar	bad application people ive try reach twitter year tell application like call emptiness	Negative	1	0	0
Google Play Store	37a91ac7-1b0d-4b86-9a84-c784265e9132	Very bad, lots of criticism.	Yazeed	##########			0	ar	us		1	ar	bad lot criticism	Negative	1	0	0
Google Play Store	eda5e941-a63a-4387-b213-86b37c7eeba1	Peace be upon you. I have a solution for individuals who struggle with logging in or transferring money. I tried accessing the application, but it freezes. When I tried using Google Chrome on my computer, it kicks me out of the browser. Then, I tried using the Opera browser and it worked for me. I advise you to change the language to English. Additionally, the mobile application still has issues,…	Farki X	##########			0	ar	us		3	ar	peace upon solution individuals struggle log transfer money try access application freeze try use google chrome computer kick browser try use opera browser work advise change language english additionally mobile application still issue especially android devices work ask prayers farewell	Neutral	0	1	1
Google Play Store	f0c8a025-a37c-4b0b-b641-9e5207c44f7a	The program needs development and there is no fingerprint login.	Alhasan Alsharif	##########			0	ar	us		1	ar	program need development fingerprint login	Negative	0	1	0
Google Play Store	7fc621a6-fa3d-45d5-834d-9aeb7dbe02c1	The services of Saudi Investment Bank are good.	بدر سعيد	##########			0	ar	us		5	ar	service saudi investment bank good	Positive	0	0	0
Google Play Store	543a73c5-2839-479d-bc6a-448a05b8fe87	Honestly, I don't know if this application receives any attention from the technology specialists in this link or if they don't care about customer complaints or if they are simply irresponsible. The application suffers from constant freezing on the Android system and there seems to be no solution. It is the height of backwardness to disregard your customers and ignore their feedback!	ابو عبدالله	##########			0	ar	us		1	ar	honestly dont know application receive attention technology specialists link dont care customer complaints simply irresponsible application suffer constant freeze android system seem solution height backwardness disregard customers ignore feedback	Negative	1	1	1
Google Play Store	f87f6e39-c306-42af-b328-50086d0a0b60	He comments that the Android system is very bad.	Abu abdalrahman	##########			0	ar	us		1	ar	comment android system bad	Negative	1	0	0
Google Play Store	5fc7a367-a5b7-4659-9a83-a3552c24ebc6	hanging	BELAL ALI	##########			0	ar	us		1	ar	hang	Neutral	0	0	1
Google Play Store	16f136db-1717-419d-8768-6f1d93ca0111	The application has become slow, especially on Android devices. When I try to access the travel card to transfer money, the application freezes and cancels the login process. I will not be able to complete my transactions except through a computer. I have contacted the bank several times by phone and they advised me to uninstall the application and reinstall it. I did that, but it was useless. Th…	ي س	##########			1	ar	us		2	ar	application become slow especially android devices try access travel card transfer money application freeze cancel login process able complete transactions except computer contact bank several time phone advise uninstall application reinstall useless make think cancel travel card replace card another bank	Negative	0	1	1
Google Play Store	d6b05c0e-bc34-464b-b638-db824623e337	Very bad. First it was better, but now it crashes and kicks you out of the program, especially when using the credit card.	mohammed altamimi	##########			0	ar	us		1	ar	bad first good crash kick program especially use credit card	Negative	1	1	0
Google Play Store	90f0554c-53a2-441b-8a56-e829aa538b20	Very bad with Huawei smartphones, they are slow.	Abdullah هلالي	##########			1	ar	us		1	ar	bad huawei smartphones slow	Negative	1	0	1
Google Play Store	2d5531e9-09de-4b70-9549-29203bfccbcf	"The application is very bad, it always hangs and does not execute commands, especially regarding the traveler card. I hope the problem is solved quickly, especially since we are in the travel season. Thank you."	Khalid SULIMAN	##########			31	ar	us		1	ar	application bad always hang execute command especially regard traveler card hope problem solve quickly especially since travel season thank	Negative	1	1	1
Google Play Store	dfc83aea-8adb-4d31-a9d9-473177b25bd0	In my life, I have never seen a program as bad as this. It is not one of the worst applications, but the worst of all. If you have the intention to sell it, give it away for free because it's not worth any money.	Azooze M	##########			1	ar	us		1	ar	life never see program bad one bad applications bad intention sell give away free worth money	Negative	1	0	0
Google Play Store	c6abc6f7-57ac-4778-85ef-e7d5f4a24145	Very bad and slow, knowing that I have complained to the appropriate authorities about this issue, and it is still the same until now. And to make matters worse, when I added a beneficiary to the program, it automatically closed on its own.	ابو سلطان	##########			3	ar	us		1	ar	bad slow know complain appropriate authorities issue still make matter bad add beneficiary program automatically close	Negative	1	0	1
Google Play Store	8879d0a3-9b54-42ab-a43c-c621c21e2298	A lot of problems and issues, unfortunately, been suffering from them for over two months.	Saleh Ruw	##########			1	ar	us		1	ar	lot problems issue unfortunately suffer two months	Negative	0	1	0
Google Play Store	ffedd001-58f0-4ea9-bf7f-28d57423ba8d	Extremely bad 🤮	armn Alnuaimi	##########			0	ar	us		1	ar	extremely bad	Negative	1	0	0
Google Play Store	8662840c-674f-4363-abc6-f587353b969d	The application is not compatible with Android 12. Please update it or there may be a problem with transferring to the travel card or vice versa. It has not been working for 6 months. I contacted the bank but there was no use.	Husain AlHusain	##########			1	ar	us		1	ar	application compatible android please update may problem transfer travel card vice versa work months contact bank use	Negative	0	1	0
Google Play Store	3663d00b-e48b-43ce-8df1-90f3413c411c	The application keeps freezing constantly.	Emad Alharbi	2022-07-08 08:08:00			1	ar	us		1	ar	application keep freeze constantly	Negative	1	0	1
Google Play Store	aa133636-13cb-4026-a771-e9b773b90622	The program needs development.	salih	2022-07-08 01:03:00			0	ar	us		2	ar	program need development	Neutral	1	0	0
Google Play Store	224841cb-ed33-4506-92c2-122d3d131665	The conversion to a travel card is not working and it keeps freezing, and the problem has been going on for more than 4 months. I called the bank and filed a complaint, but after a few days they responded saying that there is no issue with my card! I couldn't make them understand that the problem is on their end, they just refuse to understand. Everyone is facing the same issue, but the bank is i…	Abdulrhman Q	##########			1	ar	us		1	ar	conversion travel card work keep freeze problem go months call bank file complaint days respond say issue card couldnt make understand problem end refuse understand everyone face issue bank ignore	Negative	0	1	1
Google Play Store	fe91dc45-7e32-49bc-a971-188cc4a57766	Excellent with occasional error messages.	munther munther	##########			0	ar	us		4	ar	excellent occasional error message	Positive	1	1	0
Google Play Store	c2937dd1-a170-48e3-801a-4c29e2c7d5e3	The application has been constantly freezing for some time now whenever I try to add an amount to my travel card, or request a refund, or add currency. I don't know why there is a delay in resolving this issue.	khaled mohammed	2022-07-07 07:54:00			1	ar	us		1	ar	application constantly freeze time whenever try add amount travel card request refund add currency dont know delay resolve issue	Negative	0	0	1
Google Play Store	220b4d0c-c196-409b-865b-eaf9b37b618e	Find a solution for your application that has been freezing and kicking us out for months.	قلب المحيط	2022-07-07 05:47:00			0	ar	us		1	ar	find solution application freeze kick us months	Negative	1	0	1
Google Play Store	227587e2-5b87-408e-b971-9049fbb63094	The bank application is bad. Find competent and responsible developers for you.	Hussain Saeed	##########			0	ar	us		1	ar	bank application bad find competent responsible developers	Negative	1	0	0
Google Play Store	cd90b42e-674f-4efe-b2cb-7e66b2c1bac7	He frequently hangs up and exits the application. Even when using the Chrome browser on mobile, it hangs up, and you have to use the computer.	Ramzi	##########			1	ar	us		1	ar	frequently hang exit application even use chrome browser mobile hang use computer	Negative	0	1	1
Google Play Store	bbc9ffec-ba7a-4463-9ed8-4a5de10ea1ce	The application has been freezing for two weeks now. I have been trying to add a currency without success. I contacted them, but to no avail. May Allah help.	صبر جميل	##########			1	ar	us		1	ar	application freeze two weeks try add currency without success contact avail may allah help	Negative	0	0	1
Google Play Store	1ac9ebae-2397-4d1b-abe2-8fe4d73f695b	Unfortunately, the only bank that the banks around it are developing in providing electronic services to its customers is your place. Compare your application to other banks' applications so that you can see the big difference.	Rose seller	##########			1	ar	us		1	ar	unfortunately bank bank around develop provide electronic service customers place compare application bank applications see big difference	Neutral	1	0	0
Google Play Store	c1bba93b-8886-4d90-a31b-3b03831bc702	Excellent very very much	عبد الرحمن عبد الرحمن	##########			0	ar	us		5	ar	excellent much	Positive	0	0	0
Google Play Store	a77fee59-17cc-48b2-9d17-7f9b10e13fd2	"Very bad application compared to Al Rajhi, Al Riyadh, and Al Jazeera, it hangs frequently."	Abdualaziz Alkishi	2022-07-05 06:23:00			1	ar	us		1	ar	bad application compare al rajhi al riyadh al jazeera hang frequently	Negative	1	0	1
Google Play Store	fc4f379d-ba60-45fe-9d8a-2791f291416a	Why don't you develop the program and fix the errors?	man mu	##########			1	ar	us		1	ar	dont develop program fix errors	Negative	0	1	0
Google Play Store	465d4276-dcfd-4b73-a401-2dcf8ac7f0fd	The application is very bad. In my opinion, it is the worst among 3 other banking applications. It hangs frequently and if anything goes wrong, it kicks you out of the program, especially when trying to transfer to a travel card.	super pepo	##########			29	ar	us		1	ar	application bad opinion bad among bank applications hang frequently anything go wrong kick program especially try transfer travel card	Negative	1	1	1
Google Play Store	fde75331-e0ef-4973-8526-38121bfc7443	What has happened to you, oh investment? You have put us in a difficult situation, oh owners of Galaxy! It is an application for comments, and we are about to travel.	ثامر المطرودي	2022-07-01 00:41:00			0	ar	us		1	ar	happen oh investment put us difficult situation oh owners galaxy application comment travel	Negative	1	0	0
Google Play Store	84cf36cd-12a0-4da8-a4cd-bde6e0f77a7f	The worst bank in the world, very bad services.	verified accountt	##########			0	ar	us		1	ar	bad bank world bad service	Negative	1	0	0
Google Play Store	8ee2c313-6609-4477-8049-662380610091	Slow program and hangs a lot.	Khalid	##########			0	ar	us		1	ar	slow program hang lot	Negative	0	0	1
Google Play Store	4cb5bd18-c3fb-47bb-836d-489bf740fcef	The worst time that the application could experience such technical and niceic issues is now, as people are travelling and the customers are in dire need of it.	Coastal Alcoastal	##########			5	ar	us		1	ar	bad time application could experience technical niceic issue people travel customers dire need	Negative	1	1	0
Google Play Store	15abb7dd-9dad-499f-bceb-f9bd1b03237e	The application is slow and it freezes.	Abdulelah Alothman	##########			0	ar	us		1	ar	application slow freeze	Negative	1	0	1
Google Play Store	74c03259-bcfc-46e9-b9d2-8b1dd6a99933	Bad	A A	##########			0	ar	us		1	ar	bad	Neutral	1	0	0
Google Play Store	4de9cebd-3925-439a-9675-ae3f4a5f42ef	The application is bad, it doesn't work. When adding money and withdrawing with the travel card, the application hangs and does not work. Please solve the problem, it is very exhausting.	ام فيصل الفيصل	##########			1	ar	us		1	ar	application bad doesnt work add money withdraw travel card application hang work please solve problem exhaust	Negative	1	1	1
Google Play Store	5282926c-bc29-4560-bbb6-f1f760435091	"I'm trying to download the application, but it's slow and bad."	بدر البحراني	##########			0	ar	us		1	ar	im try download application slow bad	Negative	1	0	1
Google Play Store	20fe0963-f76d-46da-a085-4f88ba1113cf	The application with the most problems.	mshal alrwaili	##########			0	ar	us		1	ar	application problems	Negative	0	1	0
Google Play Store	636a67c4-7280-4203-b159-b9e3c9c027aa	The banking application in Saudi Arabia is the worst; it has no services and is always hanging.	Tariq AL	##########			0	ar	us		1	ar	bank application saudi arabia bad service always hang	Negative	1	0	1
Google Play Store	3d7ab3a0-d32b-4b77-983a-f2ccea17d710	The application is not working.	Khaled Abdullah	##########			0	ar	us		1	ar	application work	Negative	0	1	0
Google Play Store	7eaca064-1d05-4b5c-9256-163b2c43c23c	What kind of bank doesn't update its program and fix the stupid problems in it?	عبدالعزيز ابو فيصل	##########			0	ar	us		1	ar	kind bank doesnt update program fix stupid problems	Negative	1	1	0
Google Play Store	0929a8c8-1581-4f14-8935-2f7139edcefc	The application is not responding.	Abdulrahman Alqarni	##########			0	ar	us		1	ar	application respond	Negative	0	1	0
Google Play Store	0e4044e8-bb3c-45bf-be3c-2c21cd5378b2	The application has a problem, it displays an alert that it contains viruses and should be deleted from the device.	moayed hisham	##########			0	ar	us		1	ar	application problem display alert contain viruses delete device	Negative	0	1	0
Google Play Store	a284e2ed-0ca6-4576-8d31-755098224ca0	When adding credit to the travel card, the application freezes. Please solve the freezing problem. For your information, the problem has been ongoing for 10 days.	khalid M	##########			2	ar	us		1	ar	add credit travel card application freeze please solve freeze problem information problem ongoing days	Negative	0	1	1
Google Play Store	22c4dc4a-ab8b-4a7b-9314-a1d52e5ca739	An application suffering from severe lag in navigation and executing app commands. It is very exhausting to use, so the account usage will be suspended until the problem is resolved and the application is improved and updated for better performance.	WAEL QS	##########			2	ar	us		1	ar	application suffer severe lag navigation execute app command exhaust use account usage suspend problem resolve application improve update good performance	Negative	0	1	1
Google Play Store	8784f246-a67a-4148-a701-5b59b2319784	Excellent	Aoon Almeshal	##########			0	ar	us		5	ar	excellent	Positive	0	0	0
Google Play Store	b8bdcea5-9ff6-41a1-84d8-b0773fc5ca32	Good	كريم العنزي	##########			0	ar	us		1	ar	good	Positive	0	0	0
Google Play Store	4e889ed1-981e-4a31-b96c-97ba14015156	My comment about your app and website: May God take care of you, I'm unable to access my account.	راشد الفهيد	##########			0	ar	us		1	ar	comment app website may god take care im unable access account	Negative	0	1	0
Google Play Store	031fd123-8fa0-4c41-a288-2c7dec09c426	The application does not work well with Android systems, especially with the travel card and transfers (lag, unresponsiveness). I hope for a prompt solution, or we will switch to other banks.	سعود محمد	##########			30	ar	us		1	ar	application work well android systems especially travel card transfer lag unresponsiveness hope prompt solution switch bank	Negative	1	1	1
Google Play Store	27582d43-8816-42d9-926a-d5fe9478eadc	Worst banking application, always experiencing issues, freezing and denying entry, and at times when you need it the most, you cannot use it. All banks are advancing except for Al-Istihmar Bank, which is falling behind.	Abdulaziz Alsaeed	##########			0	ar	us		1	ar	bad bank application always experience issue freeze deny entry time need use bank advance except alistihmar bank fall behind	Negative	1	1	1
Google Play Store	0df97f79-9ea3-4f56-8f84-51891ed601f8	Very bad, it hangs a lot. Learn from the Al Rajhi application and don't rely on paper transactions, leave the applications to their owners.	Saad Al Motrif HR	##########			3	ar	us		1	ar	bad hang lot learn al rajhi application dont rely paper transactions leave applications owners	Negative	1	1	1
Google Play Store	1683ae10-6678-45f8-b119-38beee0365d6	The application still suffers from issues of slowness and freezing. The problem has been ongoing for a while, and we hope for a quick solution.	Majed Almaramihi	##########			2	ar	us		1	ar	application still suffer issue slowness freeze problem ongoing hope quick solution	Negative	0	0	1
Google Play Store	d4469cfc-1fef-4c4a-bd8b-235ea7745de3	A very, very poor application, and by God, it fails. It is slow, and they did not put any effort into it because, in short, it is just a web page.	Adel Alshamri	##########			3	ar	us		1	ar	poor application god fail slow put effort short web page	Negative	1	0	1
Google Play Store	8c888dc9-eb59-4a3b-bf12-e9dd178e8c4f	The application is being logged out from the Galaxy device because the bank recognizes it. Try logging in from another device where the application will function normally. What is the reason for this? I will file a complaint.	BADR I 007	##########			2	ar	us		1	ar	application log galaxy device bank recognize try log another device application function normally reason file complaint	Negative	0	1	0
Google Play Store	33c35bc9-3d00-4d67-b286-52ddc205c67d	The application has comments, bugs, and crashes. It doesn't deserve a single star. Both the application and Arab Bank are the weakest in terms of support. I hope for improvement. It's a very bad and unsuccessful experience.	‪ѕβи (⓶ sʙɴ)‬‏	##########			0	ar	us		1	ar	application comment bug crash doesnt deserve single star application arab bank weak term support hope improvement bad unsuccessful experience	Negative	1	1	0
Google Play Store	6917c2e8-0ef9-48b9-863a-5f5a506bf83a	The application is not working, what's the matter? I mean, do we have to complain!	nazzal suleman	##########			1	ar	us		1	ar	application work whats matter mean complain	Negative	0	1	0
Google Play Store	5942cb70-ca4d-4c3a-a36d-c73d92a71ee6	It used to be one of the best banking applications, but now there is a problem when accessing the travel card and recharging currency. The application is unresponsive and closes automatically. Very bad.	SULAIMAN ALSHEHRI	##########			17	ar	us		1	ar	use one best bank applications problem access travel card recharge currency application unresponsive close automatically bad	Negative	1	1	1
Google Play Store	2072e1b4-21cf-448b-af86-954856ebb6c6	After the update, it became very bad. It freezes every time when adding credit to the credit card!	عامر الندوي	##########			3	ar	us		1	ar	update become bad freeze every time add credit credit card	Negative	1	0	1
Google Play Store	657a253d-b030-443f-840e-af731a3856c3	The application is very, very, very bad on iPhone phones. The Android version is better and there are no comments.	عزيز التميمي	##########			1	ar	us		1	ar	application bad iphone phone android version good comment	Negative	1	0	0
Google Play Store	fe3fb2e3-b895-4bd0-8b8c-990ecce79f8b	The worst banking application I have ever used.	Mohammad Almatrafi	##########			0	ar	us		1	ar	bad bank application ever use	Negative	1	0	0
Google Play Store	e7f8ec35-b30b-482b-8bfc-9113f6e83038	The application is lamentable.	Hasan Saud	##########			0	ar	us		1	ar	application lamentable	Negative	1	0	0
Google Play Store	baa97a75-2f4f-47b9-b1ef-213a1fe7e941	The application is very bad, slow, and its services are weak. We hope that you update and develop it to reach a better level.	Anas SH	##########			2	ar	us		1	ar	application bad slow service weak hope update develop reach good level	Negative	1	0	1
Google Play Store	b73ce240-080f-4cc0-be30-4dbb980b7348	The application is full of problems and error messages. Whenever you need it, it tells you that an error has occurred and to try again later. I need to perform the operation at the current time, why the incompetence and waiting in vain. I have contacted customer support 100 times and they still haven't released an update. God willing, next week I will open an account with another bank and transfe…	am.hamoood	##########			1	ar	us		1	ar	application full problems error message whenever need tell error occur try late need perform operation current time incompetence wait vain contact customer support time still havent release update god will next week open account another bank transfer account bank much good	Negative	1	1	0
Google Play Store	59b122d9-cc7b-4333-b63e-be4636dbca7f	The application has become bad and does not work properly on Android devices, especially regarding credit cards and travel cards. Please solve the problem or revert to the old version, which used to work better and without any issues.	هشام أبوعبدالله	##########			58	ar	us		1	ar	application become bad work properly android devices especially regard credit card travel card please solve problem revert old version use work good without issue	Negative	1	1	0
Google Play Store	29096d35-9ba1-4929-a7a3-840ad28c022c	Very bad application. It only allows login after 25 attempts!! Is this a bank application!!??	ibrahim N	##########			1	ar	us		1	ar	bad application allow login attempt bank application	Negative	1	1	0
Google Play Store	0225352c-229b-486d-b456-579a09d2fd7a	This is terrible... By God, the worst application, not even worth one star! It's a shame! However, to be fair, Saudi Investment Bank is great in terms of the services it provides to the customers, especially since they were the first bank to introduce some unique services that other banks started copying... But the SAIB application, it's the worst application I have ever seen.	mohamad saido	##########			0	ar	us		1	ar	terrible god bad application even worth one star shame however fair saudi investment bank great term service provide customers especially since first bank introduce unique service bank start copy saib application bad application ever see	Negative	1	0	0
Google Play Store	3ae40c71-8c6f-4132-80f5-16615769000f	Thank you to everyone who followed, joined, and facilitated.	عوض الحسني	##########			0	ar	us		5	ar	thank everyone follow join facilitate	Positive	1	0	0
Google Play Store	09c28951-31f7-49f8-8e5b-8996bbd9e5b0	Always gets stuck when converting currencies.	علي العقيلي	##########			2	ar	us		1	ar	always get stick convert currencies	Negative	0	0	1
Google Play Store	e5425d87-7907-435b-acb4-9f7fefd54690	The application was deleted because it no longer works on my Samsung A51 phone. Whenever I open the application and go to add credit to the travel card, the application freezes and does not respond.	NAJM lel	##########			15	ar	us		1	ar	application delete long work samsung phone whenever open application go add credit travel card application freeze respond	Negative	0	1	1
Google Play Store	c07502f3-f61a-414f-bcaf-34eaa6ea832d	Sometimes it is so heavy and it doesn't send the verification code.	احمد الفيفي	2022-06-09 09:21:00			0	ar	us		1	ar	sometimes heavy doesnt send verification code	Negative	0	0	1
Google Play Store	b5ff3ce4-d43d-48df-ab23-328740cf63f0	I apologize, but the Arabic text seems to contain a typing error or misspelling. Could you please provide the accurate text?	Abdullah	2022-06-08 09:20:00			2	ar	us		1	ar	apologize arabic text seem contain type error misspell could please provide accurate text	Negative	1	1	0
Google Play Store	dc31bedf-bf16-4745-881a-456473c681e6	Very bad application. It hangs and cannot be used.	ahmed alatawi	##########			0	ar	us		1	ar	bad application hang use	Negative	1	0	1
Google Play Store	3ccf35dc-ca2b-4059-b1f8-c3c991bb3515	It's very slow and bad, and it belongs to a big bank. I contacted technical support more than once, but the problem with the travel card was not resolved. It is not possible to add any amount in different currencies, the application hangs.	Mhamed Said	##########			8	ar	us		1	ar	slow bad belong big bank contact technical support problem travel card resolve possible add amount different currencies application hang	Negative	1	0	1
Google Play Store	a90e6b94-dce0-4c7f-8198-161135b9fe86	There is a problem, the application has become very bad.	Toona911	##########			0	ar	us		1	ar	problem application become bad	Negative	1	0	0
Google Play Store	08e6fc06-7c88-4e9d-a1ae-14e9bddef180	The application does not work and freezes a lot.	M M	##########			0	ar	us		1	ar	application work freeze lot	Negative	0	1	1
Google Play Store	b8c42681-2ddc-488b-9da4-ced7550f1506	The application hangs at the beginning of opening it and it is slow, despite the fact that the bank is one of the best banks, but this is its flaw. I hope it can be fixed. Respectfully.	العنزي احمد	2022-06-05 04:04:00			1	ar	us		4	ar	application hang begin open slow despite fact bank one best bank flaw hope fix respectfully	Negative	1	0	1
Google Play Store	6a577c12-75ba-4964-840c-6b72ab7e9ee0	The application used to be one of the best banking applications. But recently, it has become slow in response and often doesn't work.	‪Mohammed “Abu Faris” Al Ansari‬‏	2022-06-03 07:11:00			13	ar	us		2	ar	application use one best bank applications recently become slow response often doesnt work	Negative	0	0	1
Google Play Store	67878ffe-b023-43f1-baf0-8d0dcc6584d5	Excellent bank with helpful and cooperative employees. The application is practical and efficient; it does not freeze or have any issues. Unfortunately, we praised it and now it is freezing and not opening. Very disappointing, it does not deserve any appreciation or recommendation. 👎	mmoot G	##########			0	ar	us		1	ar	excellent bank helpful cooperative employees application practical efficient freeze issue unfortunately praise freeze open disappoint deserve appreciation recommendation	Negative	1	0	1
Google Play Store	d008dfe3-8d3f-4082-8d13-fcf3c101a087	He always hesitates.	وائل الدوسري	##########			0	ar	us		1	ar	always hesitate	Negative	0	0	1
Google Play Store	2d6072b1-e0c9-460b-895e-66ec453f2023	It is bad, it refuses to enter and the message "try again later" appears!	محمد محمد	##########			0	ar	us		1	ar	bad refuse enter message try late appear	Negative	1	1	0
Google Play Store	466f037b-5f2a-42e9-80a9-ac5b62a32c7a	The application has a problem and it always freezes.	hussain ali	##########			3	ar	us		1	ar	application problem always freeze	Negative	1	0	1
Google Play Store	1e3f8ff8-43f1-497f-8739-933ed8399104	Unpleasant experience.	yousef abdullah	##########			0	ar	us		1	ar	unpleasant experience	Negative	1	0	0
Google Play Store	cb62feb9-5f87-4e66-b82a-08df17f9ef0f	It is shameful to have an application with such a design as the interface for such a great bank.	Turki Alharbi	##########			1	ar	us		1	ar	shameful application design interface great bank	Negative	1	0	0
Google Play Store	20d44515-4685-4f80-850d-d1bfa8b6d14f	Many comments when adding or buying a work, or refunding a work.	Abdulrazag Alhashim	##########			1	ar	us		1	ar	many comment add buy work refund work	Neutral	0	1	0
Google Play Store	349ae1ca-e6d9-4ea7-97fa-5eedae361fe1	Bad and very slow and unresponsive, which leads to the closure of the application.	ع	##########			3	ar	us		1	ar	bad slow unresponsive lead closure application	Negative	1	0	1
Google Play Store	02f0585b-dc30-4f41-a6bf-92463d37d200	Rotten or moldy	Khalid Alafan	##########			0	ar	us		1	ar	rotten moldy	Negative	1	0	0
Google Play Store	5bb0f4ff-0587-42bb-aeb3-d61275ee5e7f	Good.	g hh	##########			0	ar	us		5	ar	good	Positive	0	0	0
Google Play Store	a490635c-6240-4434-b1ac-416d7a82b00e	Excellent	بندر السلمي	##########			0	ar	us		5	ar	excellent	Positive	0	0	0
Google Play Store	9c9883c5-7240-48d1-ac6f-65aa390eef20	He is frustrated and his condition is not good. There is no power or strength except in Allah. What is this, my brother? Only your app hangs and causes problems. The rest of the banks, mashallah, are better. If the main bank had started, you wouldn't know how to pay bills or access the account. This is a disaster.	Man Flatron	##########			0	ar	us		1	ar	frustrate condition good power strength except allah brother app hang cause problems rest bank mashallah good main bank start wouldnt know pay bill access account disaster	Negative	1	1	1
Google Play Store	13c64882-d017-4b00-9e70-e4bced469bcc	Constantly failing updates and closed.	abdullah alotaibi	##########			2	ar	us		1	ar	constantly fail update close	Negative	0	1	0
Google Play Store	09e72254-27e4-4c58-b79f-ddea91fb0ed1	bad	Raad 66	##########			0	ar	us		1	ar	bad	Negative	1	0	0
Google Play Store	f833be2e-7bcc-4d7d-b330-92544f6c6e90	The application has a problem. It freezes when trying to recharge the currency balance and asks for closure. It also displays a security warning that the application contains viruses and should be removed. Is it possible for a bank to leave this warning appearing for over 4 months without taking any action? Truly, a bank that does not deserve to have customers.	فهد اللاحم	##########			25	ar	us		1	ar	application problem freeze try recharge currency balance ask closure also display security warn application contain viruses remove possible bank leave warn appear months without take action truly bank deserve customers	Negative	0	1	1
Google Play Store	212a5411-ba9e-4e9c-8954-5def9300bc40	The worst banking application you can deal with.	hawy Musting	##########			0	ar	us		1	ar	bad bank application deal	Negative	1	0	0
Google Play Store	9183669b-8f35-43b3-99dd-fc0efbd79e3b	There is a problem with the application, it has started freezing. Please find a solution for it.	عيسى وحيشي	##########			1	ar	us		3	ar	problem application start freeze please find solution	Negative	0	1	1
Google Play Store	4bd798e4-9677-4d28-bd9d-c08a20341888	Very bad, it hasn't improved in years, there is no quick login feature, the application is sterile and not user-friendly, very bad and outdated design, and now the system is giving a warning that the application is not secure, all of this and the bank has done nothing.	ßassam	##########			11	ar	us		1	ar	bad hasnt improve years quick login feature application sterile userfriendly bad outdated design system give warn application secure bank do nothing	Negative	1	1	0
Google Play Store	f595e2b7-a968-4d2e-88e2-fec854fd576e	"The worst bank customer service, long wait until someone answers you... and the program is very slow 👎"	عمر حمود	##########			1	ar	us		1	ar	bad bank customer service long wait someone answer program slow	Negative	1	0	1
Google Play Store	b85a8c7a-6ca5-49a1-a063-f5246defac74	Great	هيبة ملك 2016 الرأي السديد	##########			0	ar	us		5	ar	great	Positive	0	0	0
Google Play Store	abac3934-1e54-4673-b0c9-5a65c473570f	The application started to freeze a lot, especially when adding an amount to the travel card.	Riyadh Abu Ghanem	##########			5	ar	us		2	ar	application start freeze lot especially add amount travel card	Negative	0	0	1
Google Play Store	2d8e8f39-8be1-40ef-8fae-aa36eaa8dcd3	"Masha Allah, blessed be the Almighty, it solves many problems and is very easy to use at any time, with very convenient transfers. May you be successful, God willing."	My Sky	##########			1	ar	us		5	ar	masha allah bless almighty solve many problems easy use time convenient transfer may successful god will	Positive	1	0	0
Google Play Store	a1d3ce66-902c-4537-a87e-076b98049d1d	Your program crashes a lot and freezes especially for Android. Please find a solution for the program or remove it from the store. It would be better.	THE LEGEND	##########			2	ar	us		1	ar	program crash lot freeze especially android please find solution program remove store would good	Negative	0	1	1
Google Play Store	8bc691f2-0cab-4e54-af87-18e02ec86c7b	The application is very very slow.	Abdullah Aldawish	##########			4	ar	us		1	ar	application slow	Negative	0	0	1
Google Play Store	737fae78-4368-4c3d-bee6-8c777229ca73	Unfortunately, the application is bad and it freezes. Please solve these problems as this does not suit the size of the bank and does not show any appreciation for the customer.	Yaqoub alawad	##########			3	ar	us		1	ar	unfortunately application bad freeze please solve problems suit size bank show appreciation customer	Negative	1	0	1
Google Play Store	02df2d71-5280-4168-8a54-9a132c25844e	Like shit	abos3d2020	##########			1	ar	us		1	ar	like shit	Negative	1	0	0
Google Play Store	e52fa7bd-90e2-4296-88db-e787326cc1ae	No credit can be added to the travel card.	ابو عبدالله	##########			2	ar	us		1	ar	credit add travel card	Neutral	0	1	0
Google Play Store	6b5158e8-9c97-45c1-896f-f730bd62fc55	Wonderful and very easy.	SS S	##########			0	ar	us		5	ar	wonderful easy	Positive	0	0	0
Google Play Store	abf5ed49-2f2d-4457-bfae-089476c45d37	I have deleted it three times, downloaded it again, and there are still problems with it so far.	jalal abudhari	##########			4	ar	us		1	ar	delete three time download still problems far	Negative	0	1	0
Google Play Store	ba4e0b1f-f35a-430e-a119-02728aa30cd8	I don't know if there are any competent people in the management of the investment bank because everyone keeps saying that the application is bad and has issues, and there is no response when you call the toll-free number regarding any account issue. I have waited for nearly a quarter of an hour each time without any benefit. Failed administrations leave visible marks for everyone, and there is a…	E M	##########			3	ar	us		1	ar	dont know competent people management investment bank everyone keep say application bad issue response call tollfree number regard account issue wait nearly quarter hour time without benefit fail administrations leave visible mark everyone major failure manage bank electronic systems include application become annoy customers	Negative	1	1	0
Google Play Store	4c619a4d-6314-452f-b9b2-80ca39bd384e	Very bad application, it frequently stumbles, and you cannot convert to a travel card, among many other problems.	أبو مبارك	##########			11	ar	us		1	ar	bad application frequently stumble convert travel card among many problems	Negative	1	1	0
Google Play Store	0039ee6f-c710-4d09-b3dc-32e8130ab16a	Bad, and when entering the passport card, the application gives a message that it is not responding.	Mohammed Alkhoshim	##########			5	ar	us		1	ar	bad enter passport card application give message respond	Negative	1	1	0
Google Play Store	f382dc2d-3916-4d03-8440-e7f21972bb32	The application does not work on the Android system, but it works on the Apple system. Honestly, the CC bank system is very reliable.	عبدالمجيد الحربي	##########			1	ar	us		1	ar	application work android system work apple system honestly cc bank system reliable	Positive	0	1	0
Google Play Store	835e5eab-dee3-4aa7-9ed4-d4c168f8538e	The program is unresponsive regarding the passport.	MR	##########			2	ar	us		1	ar	program unresponsive regard passport	Negative	0	0	1
Google Play Store	6f52775d-fc40-4d11-bcbb-d25b66ea9405	Excellent, very, very much.	ابواحمد الهزازي	2022-05-09 05:02:00			1	ar	us		5	ar	excellent much	Positive	0	0	0
Google Play Store	c98062cd-8f60-4800-8304-4ab1fde7878f	the worst program, slow, and hangs with many errors when logging in, especially when performing banking operations such as transfers to beneficiaries and adding balance to cards.	ABDULAZIZ ALJOHANI	##########			6	ar	us		1	ar	bad program slow hang many errors log especially perform bank operations transfer beneficiaries add balance card	Negative	1	1	1
Google Play Store	023c220e-fefe-4837-94ad-23de0c7c054d	The application is not working.	kah66	2022-05-08 09:43:00			0	ar	us		1	ar	application work	Negative	0	1	0
Google Play Store	29e294e3-4023-49d9-bf15-d18a99b39c12	Slow and frequently freezes	Ahmed Al-abbad	2022-05-08 06:27:00			1	ar	us		1	ar	slow frequently freeze	Negative	0	0	1
Google Play Store	0e84d029-ad4b-4bc2-a350-79b2cb519e03	The program is very slow. I hope it gets developed.	عبدالعزيز	##########			3	ar	us		1	ar	program slow hope get develop	Negative	0	0	1
Google Play Store	47a02a3a-3204-4fee-92fe-5d59e6c1f70c	the worst bank in every sense of the word. Every time I visit the bank, the system is down. The first time I had an appointment to open an account was at 1 pm during Ramadan at Riwab branch. I didn't finish until before 3 pm, before Asr prayer, even though I had filled out my complete information on their website, which was 9 pages long. Their ATM was also not working, so they didn't print an ATM…	خالد ابوريان	##########			1	ar	us		1	ar	bad bank every sense word every time visit bank system first time appointment open account pm ramadan riwab branch didnt finish pm asr prayer even though fill complete information website page long atm also work didnt print atm card open account without card whats use opinion instead bank would good become reservations office moreover bank delete investment bank application secure source danger h…	Negative	1	1	0
Google Play Store	5593a795-86f5-4239-ba21-cb2fa761db4a	The application has become very bad and unresponsive, especially the wallet feature. It is not possible to retrieve the amounts. It is slow and hangs.	Abdulaziz AsA	##########			7	ar	us		1	ar	application become bad unresponsive especially wallet feature possible retrieve amount slow hang	Negative	1	0	1
Google Play Store	5d0f2f0a-17dc-44f0-8798-c7c2d975bb55	The application hangs a lot and some services have been canceled from Wow Rewards. I have been using it for more than 3 months and my points have only increased by about 100 points. The points account has become very, very low.	lonly man	##########			5	ar	us		1	ar	application hang lot service cancel wow reward use months point increase point point account become low	Negative	0	1	1
Google Play Store	0242a597-0c57-44b5-8609-16dd5a40a36e	The application is bad recently.	E A	##########			1	ar	us		1	ar	application bad recently	Negative	1	0	0
Google Play Store	d2ea681b-0547-4cbd-a4b3-b672f3f83591	Excellent	Mohmoh Mph	##########			0	ar	us		5	ar	excellent	Positive	0	0	0
Google Play Store	00915e94-b131-4735-95fd-ac7260aeba48	Very bad and it's stuck.	سلطان الشيباني	2022-05-05 00:52:00			1	ar	us		1	ar	bad stick	Negative	1	0	1
Google Play Store	2a4e124e-1b02-4728-bfe4-2198b8bdde8e	When downloading the application, an alert appears stating that there is a serious virus.	محمد السليماني	##########			0	ar	us		1	ar	download application alert appear state serious virus	Negative	1	1	0
Google Play Store	add6bd8e-65de-44fc-a627-5ee47ffbd578	the worst application that doesn't deserve any praise... Where are you, my bank???? Anyone who wants to get their affairs done should do it through an iPhone... any product from Apple.	KHALED M.A	2022-05-03 06:49:00			1	ar	us		1	ar	bad application doesnt deserve praise bank anyone want get affairs do iphone product apple	Negative	1	0	0
Google Play Store	2b2dce1e-59b3-4e51-b2fb-bc084e480654	The latest update has a virus, there is a problem with the update.	adel azzam	##########			0	ar	us		4	ar	late update virus problem update	Negative	0	1	0
Google Play Store	8a018240-07bb-4109-b993-22e00a42df7a	I received a warning that the application on my mobile has a virus. I deleted it and reinstalled it, but the same warning keeps repeating. I kindly request you to update it promptly.	M	##########			0	ar	us		1	ar	receive warn application mobile virus delete reinstall warn keep repeat kindly request update promptly	Negative	0	1	0
Google Play Store	581f11d6-79df-418f-acd9-cd387ca4ae30	Very, very, very, very, very, very bad, the worst banking application ever and the worst banking services ever.	shamkh Alshamkh	##########			5	ar	us		1	ar	bad bad bank application ever bad bank service ever	Negative	1	0	0
Google Play Store	9581b566-0e35-4d36-ab69-cb23a3314af1	A new program is needed.	TALAL ALMUHANNA	##########			0	ar	us		1	ar	new program need	Neutral	1	0	0
Google Play Store	6bd4203e-6253-47d4-9fd5-dff0bc3b5fa1	He constantly gets stuck, unfortunately, he needs further problem-solving treatments.	AL Sayed Lotfy	##########			6	ar	us		1	ar	constantly get stick unfortunately need problemsolving treatments	Negative	0	0	1
Google Play Store	90bb5018-1ac0-4c2d-84fb-2918e5c7818c	It is unbelievable that a bank's official program has been breached and the bank is not concerned. It is necessary to change the bank and transfer to another bank.	APO FAISUL	##########			0	ar	us		2	ar	unbelievable bank official program breach bank concern necessary change bank transfer another bank	Negative	1	0	0
Google Play Store	38b3e4fb-5b1e-419d-8b91-493aa636310d	Honestly, this bank deserves all the stars. Thank you so much from the bottom of my heart.	sultan سلطان	##########			0	ar	us		5	ar	honestly bank deserve star thank much bottom heart	Positive	1	0	0
Google Play Store	d417e1d1-d61b-419d-888b-f69f228066c6	The application is very bad, it hangs a lot and you cannot complete any process. You have to exit the application. I hope to find a solution to this problem.	aF _moh	##########			6	ar	us		1	ar	application bad hang lot complete process exit application hope find solution problem	Negative	1	0	1
Google Play Store	ca98ad4b-a5d9-4ef7-b271-4d8ed59d9eef	The application has a very dangerous virus.	محمد الزهراني	##########			0	ar	us		1	ar	application dangerous virus	Negative	1	0	0
Google Play Store	6d883ee4-8201-4ca4-a916-1b85673dc9ad	There is a virus, where is cyber security?	Ss Sss	##########			0	ar	us		1	ar	virus cyber security	Negative	0	1	0
Google Play Store	5f99ef5c-2981-4c03-af79-7ee8057b403a	The program contains a virus and gives a warning of the presence of Trojan viruses.	باسم الكويتي	##########			0	ar	us		1	ar	program contain virus give warn presence trojan viruses	Negative	1	1	0
Google Play Store	4304f834-4844-4bed-9805-39a57b851268	Special application	abo rooa sa	##########			0	ar	us		5	ar	special application	Neutral	1	1	0
Google Play Store	14555960-edff-4de3-acd5-7a008092833a	In recent times, the application does not accept adding any amount for currencies. If you enter the travel card and wanted to recharge your balance with any currency, the application stops and freezes.	abo azam	##########			0	ar	us		3	ar	recent time application accept add amount currencies enter travel card want recharge balance currency application stop freeze	Negative	0	1	1
Google Play Store	36d2f776-ab23-4dba-8c35-cf1192bce055	Honestly, the application is unsatisfactory. Currently, the system check on Android gives a warning that the program contains a harmful virus and requires mandatory uninstallation. The bank does not have a serious reaction to this issue. There is one bank whose application is very satisfactory, so we hope to keep up with that bank in its application.	YA7YA الفيفي	##########			0	ar	us		1	ar	honestly application unsatisfactory currently system check android give warn program contain harmful virus require mandatory uninstallation bank serious reaction issue one bank whose application satisfactory hope keep bank application	Negative	1	1	0
Google Play Store	470331be-3416-4d98-896e-94dfcd77fbfc	The new update contains a virus.	Bandar Saad	##########			0	ar	us		1	ar	new update contain virus	Negative	1	1	0
Google Play Store	2161adb2-0d09-45cb-a499-de3777b95978	The application is slow to grasp/understand.	ABDULLAH	##########			0	ar	us		1	ar	application slow graspunderstand	Negative	0	0	1
Google Play Store	4fa9cbf4-50e4-4b8e-bc1d-c797917b60f4	The application has something strange, a security threat message appears from Android.	Ahmed	##########			0	ar	us		1	ar	application something strange security threat message appear android	Negative	1	1	0
Google Play Store	e34f7f6c-3df4-4d5b-a9a8-724918571db9	Bad, slow, and does not work as required.	Hope	##########			3	ar	us		1	ar	bad slow work require	Negative	1	1	1
Google Play Store	d5e89821-23fd-491e-98a7-76e6a6c48b54	Bad application	Meme Aldossary	##########			0	ar	us		1	ar	bad application	Negative	1	0	0
Google Play Store	325a5555-406a-4851-937d-d5d56e747f75	Very bad in recent times after the updates.	Mn	##########			0	ar	us		1	ar	bad recent time update	Negative	1	0	0
Google Play Store	3b5061ba-fc8b-42c7-840b-cc28d16088cc	Excellent, but the latest update contains a virus, so the program should be deleted and downloaded again.	ناصر عبدالله	##########			1	ar	us		4	ar	excellent late update contain virus program delete download	Negative	1	1	0
Google Play Store	c7f001d1-7cf0-459c-8660-840b059d186a	Honesty, it's the worst banking application with many long-standing issues that they cannot solve, such as: the mobile device gives a warning that it is an insecure program, and most of the time it doesn't open and gives an unknown error, try again, and if it opens, it is very slow in navigating between options and executing transactions.	رجُل الظَلام	##########			44	ar	us		1	ar	honesty bad bank application many longstanding issue solve mobile device give warn insecure program time doesnt open give unknown error try open slow navigate options execute transactions	Negative	1	1	1
Google Play Store	3e8b3394-6109-4e6e-af07-9195cc664d29	It gives a warning that it is infected with a virus. Is the application safe and should we delete it?	amnj 123	##########			0	ar	us		1	ar	give warn infect virus application safe delete	Negative	1	1	0
Google Play Store	90bdfe14-1d2e-4911-9a5e-3031b3ffc6b1	The security program refuses due to the presence of a Trojan horse. Please work on modifying the application according to the security requirements for the clients' devices. It is noticeable that the problem exists for the majority without any action being taken by the bank to solve the problem.	othman amri	##########			0	ar	us		1	ar	security program refuse due presence trojan horse please work modify application accord security requirements clients devices noticeable problem exist majority without action take bank solve problem	Negative	1	1	0
Google Play Store	7eed29b0-c852-4b65-a811-33485f7f0690	Phone protection showed that the application contained a virus and it was deleted. It was then reinstalled and the same virus message appeared. The problem should be resolved as soon as possible. It is unreasonable for a banking application to contain a virus. Where are the developers, the update team, and the security team?	S.A.A M.A.W.Elshamy	##########			0	ar	us		3	ar	phone protection show application contain virus delete reinstall virus message appear problem resolve soon possible unreasonable bank application contain virus developers update team security team	Negative	0	1	0
Google Play Store	9e3595a5-75ca-47ba-92ed-4179e23d1324	There is a security threat with the virus. Please solve the problem.	Ma Sa	##########			0	ar	us		1	ar	security threat virus please solve problem	Negative	0	1	0
Google Play Store	cb57e6ae-3a1c-46a1-96e8-3e171c71680d	The application works great on my mobile, but this morning I received a warning message from the antivirus program on my phone, indicating that there is a security breach and virus in the program (SAIB), and it should be immediately scanned or removed. I have already deleted the program. Can you tell us what the problem is?	Ibrahim Alqassas	##########			1	ar	us		3	ar	application work great mobile morning receive warn message antivirus program phone indicate security breach virus program saib immediately scan remove already delete program tell us problem	Negative	0	1	0
Google Play Store	0a8debdf-efc8-4cdb-b8ec-8f536d02a02e	The protection on the mobile has sent me a message stating that the application is infected and it is advised to remove the application from the mobile.	ABdelaziz Elngar	##########			1	ar	us		1	ar	protection mobile send message state application infect advise remove application mobile	Negative	0	1	0
Google Play Store	60970caa-acf8-4a9d-9c0d-66f8775c745f	Excellent, fast and clear application. I have used Al-Ahli, Al-Rajhi, and Samba applications, and the investment application is the best.	lumbard zaqe	##########			3	ar	us		5	ar	excellent fast clear application use alahli alrajhi samba applications investment application best	Positive	0	0	0
Google Play Store	e4b0aea2-4d2f-4c36-a160-ca393d109130	Strange thing, it seems that there is a virus that is infiltrating data. The bank must urgently work on protecting customer data. A travel visa card has previously been compromised.	Ayman Mohammed	##########			3	ar	us		1	ar	strange thing seem virus infiltrate data bank must urgently work protect customer data travel visa card previously compromise	Negative	1	1	0
Google Play Store	e4e44e0d-39b5-4291-a7ee-091d1e54a75f	The same problem occurs for me after the update, it shows me that there is a virus.	abdullah	##########			1	ar	us		1	ar	problem occur update show virus	Negative	0	1	0
Google Play Store	0ef728fa-f312-4b6a-a6c7-ea1ce435975a	The program is good, but suddenly I received a warning from the application about the presence of a virus.	ام جنى العبدلله	##########			1	ar	us		2	ar	program good suddenly receive warn application presence virus	Negative	1	1	0
Google Play Store	f227c597-b214-41c0-9a4f-cc659a486c7b	After the update, it became unsafe.	AHMED ALHARBI	##########			1	ar	us		1	ar	update become unsafe	Negative	1	0	0
Google Play Store	4be4019b-b157-47b9-8148-974d69549208	Level in decline. I updated and received a warning from the antivirus program. I deleted the program. After a few days, I reinstalled it and used it for a day, but the antivirus program detected it again and deleted it. Our affairs have been disrupted, we need to transfer and pay off. We have gone back 10 years.	Ahmed Alghamdi	##########			6	ar	us		1	ar	level decline update receive warn antivirus program delete program days reinstall use day antivirus program detect delete affairs disrupt need transfer pay go back years	Negative	0	1	0
Google Play Store	4778ab12-2a76-4c00-be42-6f3b0efec51a	The program is written with a virus on the Android device, what is the solution?	بندر الملحم	##########			1	ar	us		3	ar	program write virus android device solution	Negative	0	1	0
Google Play Store	d5f731d0-dd02-42ba-92dd-9e49b762c400	There is a virus in the application, please fix it.	abu yazeed	##########			1	ar	us		1	ar	virus application please fix	Negative	0	1	0
Google Play Store	4d5ea2f2-a8b7-46b6-8557-762b048aa1cd	The protection system for applications and the antivirus indicate that the application is dangerous and must be removed. The latest update from your end is very weak.	Bb	##########			0	ar	us		1	ar	protection system applications antivirus indicate application dangerous must remove late update end weak	Negative	1	1	0
Google Play Store	deedabd1-00cb-4115-a132-c3ea39b07c81	The antivirus program on the phone sent a message stating that the program contains a Trojan virus, one of the most dangerous viruses, and the program has been deleted. Please solve the problem so that we can download the program.	أبوريان	##########			0	ar	us		1	ar	antivirus program phone send message state program contain trojan virus one dangerous viruses program delete please solve problem download program	Negative	1	1	0
Google Play Store	b8de82eb-46d7-4f59-a971-69118c9ff15b	"The mobile protection program sent a warning that the application contains a virus and requested its deletion! Please fix the issue urgently."	abdullah abdulaziz	##########			1	ar	us		1	ar	mobile protection program send warn application contain virus request deletion please fix issue urgently	Negative	0	1	1
Google Play Store	d75eeedd-cfe3-4481-9991-60d3a1ed332a	The program contains a virus and we have deleted the program. What is the solution?	shahd shahd	##########			0	ar	us		4	ar	program contain virus delete program solution	Negative	1	1	0
Google Play Store	152bdb60-4b94-4310-a795-d85a7c38907c	The worst application is very slow and freezes. It has a virus and there is a notification from Android security that it is infected.	BADR ALDOSARI	##########			4	ar	us		1	ar	bad application slow freeze virus notification android security infect	Negative	1	0	1
Google Play Store	b131ab76-1403-45d7-a733-f365a8acec5f	The application has been successfully deleted because it is the worst application and contains viruses that can compromise the mobile device.	Osama Jalal	##########			0	ar	us		1	ar	application successfully delete bad application contain viruses compromise mobile device	Negative	1	1	0
Google Play Store	2e832ef8-48b8-4115-be99-e1065e8404cc	The new update contains a virus. We hope you can address the issue quickly. Is there really a virus in it?	خالد الصاعدي	##########			18	ar	us		1	ar	new update contain virus hope address issue quickly really virus	Negative	1	1	0
Google Play Store	409d14f0-80c3-4ada-ba30-117adc67d1f1	The mobile gives a warning that the application is infected with a virus. Where is the problem?	Ali Bahathiq	##########			0	ar	us		1	ar	mobile give warn application infect virus problem	Negative	0	1	0
Google Play Store	c4528001-7571-4e74-9654-598268e347b7	"What is the problem with the program? It alerts the presence of a virus."	جاسم العلي	##########			0	ar	us		1	ar	problem program alert presence virus	Negative	0	1	0
Google Play Store	5e9aa8a2-4045-443e-8df3-91eb4bb54400	The system provides a alert of the presence of a virus with this application and has deleted it.	عبدالله	##########			0	ar	us		1	ar	system provide alert presence virus application delete	Negative	0	1	0
Google Play Store	a06c7b19-dc8b-4052-9728-af7b2c4e4e9d	I am now thinking of leaving this bad bank. The application always crashes, and the old transactions are still in the account and we cannot remove them.	World vision -	##########			2	ar	us		1	ar	think leave bad bank application always crash old transactions still account remove	Negative	1	1	0
Google Play Store	2cb5f3ae-84ae-4683-957c-d2da4c279eeb	Failure	Hk Lm	##########			0	ar	us		1	ar	failure	Negative	0	1	0
Google Play Store	b83c6b9f-40df-43db-bc19-135a5bdc598d	The program has contained a malicious program for a while, and the problem has not been solved. There are malicious programs in the bank application. What a disaster!	Mohannad MoHaNNaD	##########			4	ar	us		1	ar	program contain malicious program problem solve malicious program bank application disaster	Negative	1	1	0
Google Play Store	dc5fd952-b5a5-4411-9308-70c2580a2090	The mobile device gives a virus warning in the application... Apart from the application problems and it freezing... You have billions in the bank and couldn't make a good application...	bhaar afson	##########			2	ar	us		1	ar	mobile device give virus warn application apart application problems freeze billions bank couldnt make good application	Negative	1	1	1
Google Play Store	7839c172-410d-49ef-837e-c65bb6d804a2	The mobile is sending me a dangerous application warning, there are viruses.	Rt Sd	##########			0	ar	us		1	ar	mobile send dangerous application warn viruses	Negative	1	0	0
Google Play Store	2daeaf0b-2a92-44ab-9959-6f0ccfbaf1a9	The program contains a security threat warning that should be removed on Android. What's the matter, guys?	KHALID	##########			4	ar	us		1	ar	program contain security threat warn remove android whats matter guy	Negative	1	1	0
Google Play Store	48264f35-01f0-4524-af09-e6bc466a98da	The system alerts that there is a security breach in the application.	ABu Saja	##########			0	ar	us		1	ar	system alert security breach application	Negative	0	1	0
Google Play Store	a4756825-2f2e-4837-9370-01a2d414d8e9	It needs better development, there is no fingerprint.	Abdullah Al-jubairi	##########			3	ar	us		1	ar	need good development fingerprint	Negative	1	0	0
Google Play Store	3f1c823c-b60e-4136-aa88-d470bcea254a	The application is carrying a virus. Please solve the problem.	ali aljaser	##########			0	ar	us		2	ar	application carry virus please solve problem	Negative	0	1	0
Google Play Store	619b8cd3-044e-4411-b081-c8ecb2eb79d9	It gives a message about the presence of a virus.	عبدالله القحطاني	##########			0	ar	us		1	ar	give message presence virus	Neutral	0	1	0
Google Play Store	26bea111-64ab-4a92-856e-e5837c3b2121	The application is in its worst state and needs a radical update to fix many problems and constant freezing.	Mutlaq Al-Mutairi	##########			13	ar	us		1	ar	application bad state need radical update fix many problems constant freeze	Negative	1	0	1
Google Play Store	ed6192b0-8a3b-41d8-95d2-5ff83266040a	There is a Trojan virus in it, as described by the device's protection. Please address the matter as soon as possible.	Haym Ali	##########			7	ar	us		1	ar	trojan virus describe devices protection please address matter soon possible	Negative	0	1	0
Google Play Store	4cdb807f-48af-4a8e-8c08-bd9c92fcba34	The application is a virus and Trojan horse, and it has been deleted. This is how it was detected by the McAfee security program.	ابو عدي	##########			0	ar	us		1	ar	application virus trojan horse delete detect mcafee security program	Negative	0	1	0
Google Play Store	91ccc6c6-ebe0-46e0-b105-622b722de488	When downloading the program, a warning message appears saying that the program contains the Trojan horse virus. What should I do?	tarek elshony	##########			0	ar	us		1	ar	download program warn message appear say program contain trojan horse virus	Negative	0	1	0
Google Play Store	8fcb2207-4a18-4510-9586-1d95ebd511df	The application has a virus and the application has been deleted from the mobile. We hope to fix the problem urgently.	Mubarak Hussain	##########			0	ar	us		1	ar	application virus application delete mobile hope fix problem urgently	Negative	0	1	0
Google Play Store	c932acf1-2628-4103-9d13-e5251eef41f6	During the last update, the device warned me that the application is filled with viruses.	Abu Fouzan	##########			0	ar	us		1	ar	last update device warn application fill viruses	Negative	0	1	0
Google Play Store	6049dfd2-be6b-4817-8e3b-1cd8eafdeb6f	Google's protection warns against the application and describes its danger as high!!!	A Almalky	##########			0	ar	us		1	ar	google protection warn application describe danger high	Negative	1	0	0
Google Play Store	ed0d48c2-8578-4eb6-9df2-8675b313b123	The program contains a Trojan horse virus.	Ammar	##########			0	ar	us		1	ar	program contain trojan horse virus	Negative	1	1	0
Google Play Store	6ec76776-a7cb-4bf3-888b-0323b177c76b	The worst application in Saudi banks.	rami ahmad	##########			0	ar	us		1	ar	bad application saudi bank	Negative	1	0	0
Google Play Store	9e7579c1-ac28-4e64-a71b-18780286435a	You need people who know how to work with the application and the whole website because it's all exhausting.	SALEH MOHAMMED	##########			0	ar	us		1	ar	need people know work application whole website exhaust	Negative	1	0	0
Google Play Store	59b58a9b-8224-416c-bf0e-efd96c81d030	I get a high-risk warning after downloading the application. We kindly request you to update it.	Ammar AlSaffar	##########			1	ar	us		1	ar	get highrisk warn download application kindly request update	Negative	0	1	0
Google Play Store	6a2f51d7-221f-4a0a-bdf0-af23db8ce8ee	The program is being deleted from my device. What is the problem? I received a message saying the program is infected. What is the problem? Please provide a solution quickly. I need the program.	رسمتك حلم الحريب	##########			1	ar	us		1	ar	program delete device problem receive message say program infect problem please provide solution quickly need program	Negative	0	1	0
Google Play Store	24872561-c4b8-42cf-9bf0-ac2632692743	Please check the application. May Allah reward you with goodness. I gave it one star.	متوسد شماغي	##########			0	ar	us		1	ar	please check application may allah reward goodness give one star	Positive	1	0	0
Google Play Store	2ab6594a-bb88-42ae-9fe6-ba8441d38d28	The worst banking application	Mohammed Ahmed	##########			0	ar	us		1	ar	bad bank application	Negative	1	0	0
Google Play Store	765c33c9-cac2-477b-9f9a-4bcb57bad08e	The device refuses to install it due to the presence of viruses... What is the problem?	bbaas2244 Asmi	##########			1	ar	us		1	ar	device refuse install due presence viruses problem	Negative	0	1	0
Google Play Store	714a97e1-3bfb-4ae6-adc4-6e1ecb72cefa	The application is excellent, but suddenly my antivirus program informed me that this application is a Trojan horse virus that can access the device's data. This is what made me cancel it and download it again, may God protect.	وليد بن عبدالله	##########			21	ar	us		3	ar	application excellent suddenly antivirus program inform application trojan horse virus access devices data make cancel download may god protect	Negative	1	1	0
Google Play Store	2631a31b-4d73-48f9-8355-f7966ca5d6e4	It is easy but slow and does not work quickly. Every day there is an update for the software and an update for the data. They are driving us crazy. On top of that, you have to try twice for the program to open. It has to freeze at the beginning. And of course, the bank is sleeping on the job, as our Egyptian brothers say. It wastes money and doesn't develop.	The old man	##########			1	ar	us		2	ar	easy slow work quickly every day update software update data drive us crazy top try twice program open freeze begin course bank sleep job egyptian brothers say waste money doesnt develop	Negative	1	1	1
Google Play Store	c3c828cf-6278-42c6-93c6-41869060a60b	When downloaded from Google Play, it alerts that the application has a security breach and advises against downloading it. It also contains a virus. Be cautious, be cautious.	عسل عبدالله الخلف	##########			2	ar	us		1	ar	download google play alert application security breach advise download also contain virus cautious cautious	Negative	1	0	0
Google Play Store	8f8c734b-b7c5-4a68-98ee-247007a0e2b8	The program, upon being updated, turned out to contain a virus.	خالد عسيري	##########			1	ar	us		1	ar	program upon update turn contain virus	Neutral	1	1	0
Google Play Store	85739254-2a84-45c9-9bf7-58f3023eb4c2	Is it reasonable for an official bank program to give me a warning on my mobile about a harmful program, in addition to being slow and freezing frequently?	Salman	##########			15	ar	us		1	ar	reasonable official bank program give warn mobile harmful program addition slow freeze frequently	Negative	1	0	1
Google Play Store	747c1c31-8e11-4e54-88c4-ea2710917770	Every time I run the application, it turns out that it is a virus.	ali qaysi	##########			1	ar	us		1	ar	every time run application turn virus	Negative	1	1	0
Google Play Store	1f757ba1-e23a-4761-976e-1a8943290053	Please make sure to update in the Play Store.	abdulaziz althpity	##########			0	ar	us		1	ar	please make sure update play store	Neutral	0	1	0
Google Play Store	6dcba8d3-2c85-4d4b-bcf4-ebd2d552bce1	The application is infected with a virus, be careful of it. I received a warning from the store regarding it.	MADODI 007	##########			1	ar	us		1	ar	application infect virus careful receive warn store regard	Negative	1	0	0
Google Play Store	78fd6362-7736-427f-88c8-1d994eee6db6	Be careful, once you download it, there is a security threat. After downloading, the application may turn out to be infected. Remove the verification process.	صاحب السمو ،	##########			1	ar	us		3	ar	careful download security threat download application may turn infect remove verification process	Negative	1	1	0
Google Play Store	95b7e32c-d2df-4289-92b6-95e4a9da4c36	Contains a virus	بوكو الجديد	##########			1	ar	us		1	ar	contain virus	Neutral	1	0	0
Google Play Store	b9ee6e7a-d0f2-4db7-af29-082ca8610159	A very unsuccessful software program. Every time I download the application, it turns out to be a virus scanner program and the program is not secure.	mustafa alhawekem	##########			3	ar	us		1	ar	unsuccessful software program every time download application turn virus scanner program program secure	Negative	1	0	0
Google Play Store	ad9e3585-050d-422e-ba05-963de79237d3	I have updated the program, but the mobile security system sent me a warning message to delete the program because it contains a virus. 🙁🙁 We hope to resolve the problem as soon as possible.	Eng. Almalih	##########			51	ar	us		1	ar	update program mobile security system send warn message delete program contain virus hope resolve problem soon possible	Negative	0	1	0
Google Play Store	2d739b3d-e26b-49f7-b749-51687b705cc4	The best bank and I hope for improvement.	Majed Hoor	##########			1	ar	us		5	ar	best bank hope improvement	Positive	0	0	0
Google Play Store	40e77f4f-fd11-4b9f-9c9a-1f6c0d5dd208	The application is slow and needs a lot of work. The latest update has a problem; it gives a message that there is a virus!	ABDULLAH HAMAD	##########			69	ar	us		1	ar	application slow need lot work late update problem give message virus	Negative	0	1	1
Google Play Store	cf2e9368-4606-48a0-9ae9-49a9ffaee88d	The application is slow and does not log in every time; it always says registration failed. Do not rely on it; it hinders your work.	majed	##########			9	ar	us		1	ar	application slow log every time always say registration fail rely hind work	Negative	0	1	1
Google Play Store	8f4280fc-930d-4518-937c-11ad524c3f11	You have a virus called Tafou Jan.	ALI S ALNASHRY	##########			0	ar	us		2	ar	virus call tafou jan	Negative	1	1	0
Google Play Store	8ad2c508-b618-4b86-b05a-8eace8640249	After the update, I received a notification that the application is infected with the Trojan horse virus. After cleaning, the antivirus program deleted the application due to the virus. Please urgently resolve the issue as we rely on the application daily.	هيثم حمدي	##########			3	ar	us		1	ar	update receive notification application infect trojan horse virus clean antivirus program delete application due virus please urgently resolve issue rely application daily	Negative	0	1	0
Google Play Store	c63954a2-4891-43b5-84c5-930ff8bd15c6	After the update, a security threat alert appears, saying that the application is infected and advises to uninstall it immediately.	عناد الصخري	##########			4	ar	us		1	ar	update security threat alert appear say application infect advise uninstall immediately	Negative	0	1	0
Google Play Store	871a7a62-d744-48ba-a5b1-446a56425eb2	At first, it was excellent but now it has become the worst of the worst, and there is no solution to the problem. It keeps freezing, even on Google Chrome, same problem.	SYMLOVE ALSUMMAN	##########			7	ar	us		1	ar	first excellent become bad bad solution problem keep freeze even google chrome problem	Negative	1	0	1
Google Play Store	0d322ca1-8876-41b9-afc7-a461507d9ab9	Needs improvement.	ABDULLAH AL DEAILJ	##########			0	ar	us		1	ar	need improvement	Neutral	1	0	0
Google Play Store	88d83cbd-1ca3-4e9d-84d6-eab078fab4a0	If there were less than a star, I would have given it. It used to be one of the best and easiest applications and the fastest one after the update, it became garbage and heavy, and it does not open quickly.	قاهر المجوس دام عزك يالسعوديه	##########			1	ar	us		1	ar	less star would give use one best easy applications fast one update become garbage heavy open quickly	Negative	1	0	1
Google Play Store	f5e431f0-64d0-495e-aca1-e83f68c483c5	I swear, it's terrible and extremely slow, and it doesn't add coins and keeps crashing for a year.	Sultan Alasmry	##########			0	ar	us		1	ar	swear terrible extremely slow doesnt add coin keep crash year	Negative	1	1	1
Google Play Store	9ac24902-847b-4a16-a588-bc35720d719a	Thank you very much for your efforts and dedication.	ابومحمد ابو محمد	##########			0	ar	us		5	ar	thank much efforts dedication	Positive	0	0	0
Google Play Store	26af80d9-83ff-4ac0-bb9b-1b729fd4142a	The application is always freezing and the banking phone didn't solve the application problem. I contacted them many times without any benefit. Actually, the application was working fine without any freezing.	Mr. NASSER	##########			4	ar	us		1	ar	application always freeze bank phone didnt solve application problem contact many time without benefit actually application work fine without freeze	Negative	0	1	1
Google Play Store	2796d155-621f-481b-8a60-5f54fc588a21	After entering, I found that the travel app is very bad.	Abdullah	##########			2	ar	us		1	ar	enter find travel app bad	Negative	1	0	0
Google Play Store	cf014c86-50bb-4d3b-ab60-f3497de6f700	It used to work and close smoothly.. It was good.. but now it has become extremely bad.	احمد الحتيرشي	##########			0	ar	us		1	ar	use work close smoothly good become extremely bad	Negative	1	0	0
Google Play Store	f40c741f-19bd-4bbf-80ca-d68f17d6f63d	"Badly stuck"	HMOD_KSA_ HMOD	##########			0	ar	us		1	ar	badly stick	Negative	1	0	1
Google Play Store	9c44244e-9c1f-4c6f-a5d4-ae9ece18abd6	The application is very bad.	الحسن حكيم	##########			0	ar	us		1	ar	application bad	Negative	1	0	0
Google Play Store	744745db-3356-485e-a66c-43de82578dd4	The program is bad, it freezes and doesn't open the passport and remittance card. It's always bad, I access my account through Google browser instead. This program has been bad for a long time without any updates or attention from the bank.	بدر سعود	##########			3	ar	us		1	ar	program bad freeze doesnt open passport remittance card always bad access account google browser instead program bad long time without update attention bank	Negative	1	1	1
Google Play Store	bed69f55-64c1-4559-9d1d-3a4fd4d7144e	It's done.	لطفي الصايغ	##########			0	ar	us		5	ar	do	Neutral	0	1	0
Google Play Store	894aa6ca-199f-4ef8-87fb-3d89b6f87905	Bad, it hangs and doesn't open, and it's a bank and this is your application.	thamer alqurashi	##########			0	ar	us		1	ar	bad hang doesnt open bank application	Negative	1	1	1
Google Play Store	49b47a09-61bd-4ad8-8fcd-143af012d37d	Unfortunately, the application is very, very bad. Every time I try to login, it rejects it and the reason is an error in the username or password, even though they are correct. The application is very bad.	OMAR ALESSA	##########			5	ar	us		1	ar	unfortunately application bad every time try login reject reason error username password even though correct application bad	Negative	1	1	0
Google Play Store	d57d6447-d175-4a34-955a-fdb5fca2608a	For two months now, the application has been very bad and does not execute any operation.	ناصر NASSER	##########			1	ar	us		1	ar	two months application bad execute operation	Negative	1	1	0
Google Play Store	0ccc321b-f958-4eaa-a529-6b643dd22102	The application is very bad and it lacks development. It also doesn't open quickly, it's soooo slow. We kindly request the bank management to consider this matter.	alinezy aboood	##########			0	ar	us		1	ar	application bad lack development also doesnt open quickly soooo slow kindly request bank management consider matter	Negative	1	1	1
Google Play Store	5507b079-51e3-4f75-b770-da6f29d3248f	It used to be great and ahead of everyone, but now it has become the worst and slowest, and it contains many technical problems and errors.	abdullah a	2022-04-09 03:50:00			4	ar	us		1	ar	use great ahead everyone become bad slow contain many technical problems errors	Negative	1	0	1
Google Play Store	0eb07cc3-2484-48e2-88b8-bf66c0febfe7	Slow and heavy like it has many stars on it. Please take care of it so that it can rise like Al-Rajhi, Al-Ahli, and the rest of the banks.	ابو مشعل	2022-04-04 01:08:00			0	ar	us		1	ar	slow heavy like many star please take care rise like alrajhi alahli rest bank	Neutral	0	0	1
Google Play Store	f5f8ee7b-3f8a-4a1b-96f2-14066746b596	A nice program. However, it freezes when attempting to recharge the travel card.	Fahad33 Alfahad33	##########			0	ar	us		1	ar	nice program however freeze attempt recharge travel card	Negative	1	1	1
Google Play Store	d2d0b3c2-9243-4d3a-b1b4-4769caa976e9	The application is slow and there are frequent crashes. It needs an update. Where are you, lazy bank and developer?	Raiyd Qahtani	##########			0	ar	us		1	ar	application slow frequent crash need update lazy bank developer	Negative	1	1	1
Google Play Store	3701a9b6-47dc-4bf2-bccf-b206991a9301	He speaks a lot and slowly.	anas saad	2022-04-01 08:39:00			0	ar	us		1	ar	speak lot slowly	Neutral	0	0	1
Google Play Store	ef7816e9-13f3-4caf-b174-ee7774efab9f	The application is not up to the required level.	Abdulrahman Alkhaldi	##########			0	ar	us		1	ar	application require level	Negative	1	0	0
Google Play Store	0b2c3b90-56fe-4719-973a-fe3e8c55587b	Please solve the problems of the application that are increasing every day, otherwise I will switch to another bank. I cannot transfer money to and from my accounts, and my card is freezing and causing me trouble now.	3veGo	##########			0	ar	us		1	ar	please solve problems application increase every day otherwise switch another bank transfer money account card freeze cause trouble	Negative	0	1	1
Google Play Store	aba9f2f8-34b7-4b11-acb4-f5a646646909	It used to be excellent, and now it is at its worst, with terrible comments everywhere.	HASSAN ALMUKHAYDIR	##########			0	ar	us		1	ar	use excellent bad terrible comment everywhere	Negative	1	0	0
Google Play Store	23622dfd-7d0c-453a-84e7-53478ac23a43	Beautiful, but it needs some modifications.	عبدالعزيز الخنيفر	##########			0	ar	us		3	ar	beautiful need modifications	Positive	1	0	0
Google Play Store	4e7b5745-e836-4c97-b89b-eebdf87917fd	If you withdraw or pay your balance in the program, it does not change until after a period of time. What is this slowness!	Husaam	##########			0	ar	us		1	ar	withdraw pay balance program change period time slowness	Negative	0	1	1
Google Play Store	3d3fbe1d-20c8-4109-93ed-49ecc2beacbd	Very slow.	Khalid A	##########			0	ar	us		1	ar	slow	Negative	0	0	1
Google Play Store	a3cdc8f7-b64a-4d52-8b83-17189e6a8784	The application has become worse after the latest update, it lags at every step... Find a solution for yourselves, a bank with financial resources should be able to design an application that works smoothly like other banks.	Talal alsuwaidani	##########			0	ar	us		1	ar	application become bad late update lag every step find solution bank financial resources able design application work smoothly like bank	Negative	1	0	1
Google Play Store	b32dcfce-0378-487f-a97f-6330a1027678	He procrastinates a lot, is often late, and stops working suddenly.	Ayman Aldhahri	##########			0	ar	us		1	ar	procrastinate lot often late stop work suddenly	Negative	1	1	1
Google Play Store	f16a1d16-0601-4759-8598-8f9495b6ac9b	Unfortunately, it freezes and does not respond at all.	نبيل الحربي	##########			0	ar	us		1	ar	unfortunately freeze respond	Negative	1	0	1
Google Play Store	8d3204f3-55b6-4ef6-afd7-106b23b92550	It needs a somewhat slow update; it needs to add purchasing services (an online market) and add quick access with a password or fingerprint when entering the travel card, also when entering the travel card an error message appears!	Fahad alotaibi	##########			17	ar	us		3	ar	need somewhat slow update need add purchase service online market add quick access password fingerprint enter travel card also enter travel card error message appear	Negative	0	0	1
Google Play Store	aa855c6e-7cf6-4b36-94ba-e3bf31e901ef	I was in Egypt and I was very embarrassed by the congestion and slowness, especially with a passport that I did not benefit from due to the slow application process. 😒	عبدالله الحربي	##########			0	ar	us		1	ar	egypt embarrass congestion slowness especially passport benefit due slow application process	Negative	1	0	1
Google Play Store	3feeba4f-07f8-45bf-9b98-7eb7197fbebc	The application used to be good previously, but recently it has become slow and hangs a lot. Sometimes it even refuses to login. The application needs to be fixed and I am going to delete it because I am no longer benefiting from it.	bassam ghannoum	##########			1	ar	us		1	ar	application use good previously recently become slow hang lot sometimes even refuse login application need fix go delete long benefit	Negative	1	1	1
Google Play Store	39984bdb-e2d7-4dd3-bf33-0aa2886f74e6	The application frequently hangs and consumes a lot of battery. I hope it gets fixed, otherwise we will look for other applications that serve our interests.	Vander Sad	##########			0	ar	us		1	ar	application frequently hang consume lot battery hope get fix otherwise look applications serve interest	Negative	0	1	1
Google Play Store	f03d6e16-b0f0-4910-9c09-0ebf5b06227e	Very bad application, many comments.	Mohammed zahi almussalam	##########			0	ar	us		1	ar	bad application many comment	Negative	1	0	0
Google Play Store	39e606ca-1699-431b-92d4-17e0690f10e0	Outstanding application	سلمان العنزي	##########			0	ar	us		5	ar	outstanding application	Positive	0	0	0
Google Play Store	c27957da-0d57-452b-abbc-bdfc2713f3f2	The application is very, very slow.	Sd	##########			0	ar	us		1	ar	application slow	Negative	0	0	1
Google Play Store	c5d3f196-ff12-4e80-b96e-c67abfab6aa2	Good	ابوتميم الشمري	##########			0	ar	us		5	ar	good	Positive	0	0	0
Google Play Store	bc33c15f-6030-481b-b20f-de1a57495fbd	One of the most failed banking applications in Saudi Arabia is always freezing, and the program interface is uncomfortable and complicated.	Mhyo N	##########			0	ar	us		1	ar	one fail bank applications saudi arabia always freeze program interface uncomfortable complicate	Negative	1	0	1
Google Play Store	32bdf9d7-b98f-486b-9e10-c63366c8f023	A primitive application, but serves the purpose, administrative procedures for the bank are boring and outdated.	هزيم الرعد	##########			0	ar	us		1	ar	primitive application serve purpose administrative procedures bank bore outdated	Negative	1	0	0
Google Play Store	7a08796c-0138-4ca8-9bad-89d7513a367b	Fingerprint Unlock system is not available............. The bank will not contact you if you request to add a beneficiary.	Məmməd	##########			2	ar	us		1	ar	fingerprint unlock system available bank contact request add beneficiary	Negative	0	1	0
Google Play Store	fd18a361-d30d-43b4-8e42-6f79670e7c1a	Zafat	محمد ال نجدي	##########			0	ar	us		1	ar	zafat	Neutral	0	0	0
Google Play Store	c9d6668a-2f0a-45e5-96c7-3c5d696154fa	I am a new customer and I would like to share my experience with the Saudi Investment Bank application: it was bad due to the extremely slow and annoying system + there is no option for reading the text message to access the application (automatic filling) + there are notes on the design and interface of the program. I hope for improvement for the better, as I changed my mind about transferring m…	معاذ	##########			4	ar	us		1	ar	new customer would like share experience saudi investment bank application bad due extremely slow annoy system option read text message access application automatic fill note design interface program hope improvement good change mind transfer salary due amount dissatisfaction express customers comment application thank	Negative	1	1	1
Google Play Store	5c9bdb11-91bb-44d5-9454-5d85ba264ce7	The application developer did a very bad job. Despite the bank's progress in some features, especially the travel card, it is very slow in developing the application.	تركي الغامدي	##########			4	ar	us		1	ar	application developer bad job despite bank progress feature especially travel card slow develop application	Negative	1	0	1
Google Play Store	d54d6560-9f14-461a-909d-b329ef6e8435	There is a problem and a freeze in the application.	s_ alghamdi	##########			1	ar	us		1	ar	problem freeze application	Negative	0	1	1
Google Play Store	1f97e2cf-25b7-4a58-afcd-047be3b77c0a	"By God, I am amazed at all the banks that were once at the forefront of development, and now they have the worst programs that exhibit a backwardness in technology. The truth is, this is the beginning of the end for banks."	BANDAR Alhumaimidi	##########			1	ar	us		1	ar	god amaze bank forefront development bad program exhibit backwardness technology truth begin end bank	Negative	1	0	0
Google Play Store	e51fbb5b-8e60-48c4-bef3-63e58cd4780c	I didn't expect this program to be of poor quality.	توو فيق	2022-03-09 02:15:00			0	ar	us		1	ar	didnt expect program poor quality	Negative	1	0	0
Google Play Store	13efad20-57c3-4501-a50a-ac70c8d6b7f0	the worst bank, as the word implies.👎	2007 aburayyan	2022-03-08 04:34:00			3	ar	us		1	ar	bad bank word imply	Negative	1	0	0
Google Play Store	085092ec-58f2-4931-bcfe-82bc0b8edbdb	The application used to be excellent for a long time and was one of the best banking applications. Currently, it is one of the worst applications, slow, and often freezes. Sometimes it refuses to log in.	محمد القرني	##########			21	ar	us		1	ar	application use excellent long time one best bank applications currently one bad applications slow often freeze sometimes refuse log	Negative	1	0	1
Google Play Store	176306d2-9252-4a06-814a-5d8773436635	"Very bad and not at all honest, they claim to convert currencies without any fees, but I found out that they deducted an amount."	Amsfg Amsfg	2022-03-02 00:42:00			1	ar	us		1	ar	bad honest claim convert currencies without fee find deduct amount	Negative	1	1	0
Google Play Store	e2c27ebe-8756-4d7a-88db-28224b63a288	The best bank.	لمار المالكي	2022-03-01 09:49:00			0	ar	us		5	ar	best bank	Positive	0	0	0
Google Play Store	4c5feb21-1b25-4671-88cc-79bf3a8c1bb0	The worst bank in life and the worst application, you don't deserve even a star.	Kh Sa	##########			0	ar	us		1	ar	bad bank life bad application dont deserve even star	Negative	1	0	0
Google Play Store	54da50e9-0336-4450-af56-8779ecff94bd	Very heavy primitive application.	ABU ASAILE	##########			0	ar	us		1	ar	heavy primitive application	Negative	0	0	1
Google Play Store	e283e1d0-f226-4bd2-a73c-0e78d29fa72c	It is very bad because it doesn't work sometimes and I have to open my account through Google.	حمد آل إبراهيم	##########			4	ar	us		1	ar	bad doesnt work sometimes open account google	Negative	1	1	0
Google Play Store	ef03ef1e-2160-403e-9c55-edc95e849a09	The bank is excellent... but the application always crashes.	kamal alamoudi	##########			1	ar	us		4	ar	bank excellent application always crash	Negative	1	1	0
Google Play Store	56df2610-6ba4-4aa8-9ff5-fcce11319d5d	Your application is very slow and has many problems.	meesh_775	##########			0	ar	us		1	ar	application slow many problems	Negative	0	0	1
Google Play Store	d39f3fd4-7156-4fc9-be09-bdbe6d7b4d26	Bad experience	Saad Ali	##########			0	ar	us		1	ar	bad experience	Negative	1	0	0
Google Play Store	77f36bdf-dcb4-4471-9706-1ef6ebbcad93	Very bad	Almulhag A	##########			0	ar	us		1	ar	bad	Negative	1	0	0
Google Play Store	9b4eb602-a6b5-433a-96d2-d3daf39286c6	Unfortunately, the bank is the worst and the customer service is the worst service you may encounter in your life.	ABDULELAH BIN KHTHLAN	2022-02-08 09:09:00			0	ar	us		1	ar	unfortunately bank bad customer service bad service may encounter life	Negative	1	0	0
Google Play Store	9fcb2d98-ccde-41fd-b28f-98292031ade0	The application is extremely bad, slow, and raises blood pressure.	FB i	##########			0	ar	us		1	ar	application extremely bad slow raise blood pressure	Negative	1	0	1
Google Play Store	76362dc5-80ae-4ed6-b742-b45df587e147	The worst banking application ever, and unfortunately, there is no management that interacts with customers. It seems that the bank is about to collapse soon.	Abbas Mahdi	##########			2	ar	us		1	ar	bad bank application ever unfortunately management interact customers seem bank collapse soon	Negative	1	0	0
Google Play Store	ab4fdb7e-16dc-43c5-9f95-65bcdfe64f8b	There is a problem of unresponsiveness and delay.	Eng. Ayed	##########			1	ar	us		1	ar	problem unresponsiveness delay	Negative	0	0	1
Google Play Store	d8c8ad81-ac0c-4b10-a6c3-c6e0df809ac5	It is not practical and has some complexity. The management needs to see what the customer wants and attract them, not push them away from the bank.	عبدالله الشمري حائل	##########			0	ar	us		1	ar	practical complexity management need see customer want attract push away bank	Negative	1	0	0
Google Play Store	d9b46437-5dc0-4499-ad70-7b4248d397c0	Unfortunately, the bank's services and banking transactions, especially the transfer of my salary, are very poor compared to some other banks.	أحفظ الله يحفظك سبحان الله	##########			4	ar	us		1	ar	unfortunately bank service bank transactions especially transfer salary poor compare bank	Negative	1	0	0
Google Play Store	db3aa7d8-32ae-4f45-a318-13a19b6f8cff	The application is bad.	SAEED	##########			0	ar	us		1	ar	application bad	Negative	1	0	0
Google Play Store	56329aa0-df22-462d-8877-d37debf80f6e	Unfortunately, the bank has closed my account. They said that I haven't used it for three months, even though my salary is transferred to the account every month and all my purchases are made from it. When I asked them, they said they don't know the reason. It's a very bad experience after five years with them.	محمد سعيد	##########			10	ar	us		1	ar	unfortunately bank close account say havent use three months even though salary transfer account every month purchase make ask say dont know reason bad experience five years	Negative	1	1	0
Google Play Store	c5cb19b0-be05-47d1-9dcc-772da7c0c08d	Dear Eye of Valor, Kuwaiti Arab nice Abu Khaled Abdul Kareem Abdul Qadir Al Omari is 80 years old. I am Abdul Majid bin Mohammed bin Othman Hawsawi, Saudi national from Riyadh. Peace be upon you. After that, praise be to Allah for the Arab nice Abdul Kareem Abdul Qadir Abu Khaled. I am Abdul Majid Mohammed Al Omari, 27 years old.	ABDULMAJEE DMOHAMMEDO	##########			0	ar	us		5	ar	dear eye valor kuwaiti arab nice abu khaled abdul kareem abdul qadir al omari years old abdul majid bin mohammed bin othman hawsawi saudi national riyadh peace upon praise allah arab nice abdul kareem abdul qadir abu khaled abdul majid mohammed al omari years old	Positive	0	0	0
Google Play Store	09f2cfcc-0f12-447e-8ef7-b39b88c262c0	The worst and heaviest banking application you will use, it requires an i9 12900k processor to work properly. It's really horrible.	slman	2022-01-05 08:44:00			0	ar	us		1	ar	bad heavy bank application use require k processor work properly really horrible	Negative	1	0	1
Google Play Store	4a4d83a0-4085-4140-ab28-5af7449b46fb	There is no life for those who call out, the application goes from bad to worse.	A7M3D	##########			1	ar	us		1	ar	life call application go bad bad	Negative	1	0	0
Google Play Store	e8084e7e-2cd1-41df-ac6a-7e17a715c966	The application is bad.	majid Mab	2022-01-04 04:24:00			0	ar	us		1	ar	application bad	Negative	1	0	0
Google Play Store	20d387a5-909e-424e-98f3-e0319473cf55	Excellent	عبدالرحمن العتيبي	##########			0	ar	us		5	fa	excellent	Positive	0	0	0
Google Play Store	5ee74b39-ad11-4e21-b8ec-a618bc6248ff	It is not worth it and it is not important.	Ali Alharbi	##########			0	ar	us		1	ps	worth important	Negative	0	0	0
Google Play Store	3964410d-f478-44de-b12f-4b7691404dcf	Excellent	Aa Aaa	##########			0	ar	us		5	ur	excellent	Positive	0	0	0
Google Play Store	123e9563-b369-460f-9ee4-80c096f97f5f	Excellent	فايز المساوى	##########			0	ar	us		5	ur	excellent	Positive	0	0	0
Google Play Store	d9a29640-a02c-4c39-b5fa-86778d19b092	Excellent	ابو سامي	##########			0	ar	us		5	ur	excellent	Positive	0	0	0
Google Play Store	d69ef7aa-807e-4d9f-8714-8db0697edc57	Excellent	الإعلامي محمد بن حمد المسبحي (ابو حمد)	##########			0	ar	us		5	ur	excellent	Positive	0	0	0
Google Play Store	0a034601-6c75-4507-9a3d-0067d6fdd8f5	Excellent	NAJE ALHABABI	##########			0	ar	us		5	ur	excellent	Positive	0	0	0
Google Play Store	f51e51d7-5c5a-4d38-a583-90d3954a0453	Excellent	مستخدم Google	##########			0	ar	us		1	ur	excellent	Positive	0	0	0
Google Play Store	efc46bd8-887b-4c6e-8882-a11e3ec6e1a1	Excellent	Nnjj Nnjj	##########			0	ar	us		5	ur	excellent	Positive	0	0	0
Google Play Store	e0bee420-b1fd-4995-b68c-d584170e8ff4	Excellent.	عبده مسملي	##########			0	ar	us		5	ur	excellent	Positive	0	0	0
Google Play Store	a582e156-7172-42c5-bfa0-a252485dc3ac	Excellent	Saad Alqathani	##########			0	ar	us		5	ur	excellent	Positive	0	0	0
Google Play Store	b4aec4d0-58fc-4a76-b201-6c104da045e1	Excellent	Ahmad Alzahrani	##########			0	ar	us		5	ur	excellent	Positive	0	0	0
Google Play Store	78c0b66a-6faf-40e0-959f-6cb3d8307ee3	Excellent	عبده مسملي	##########			0	ar	us		5	ur	excellent	Positive	0	0	0
Google Play Store	271246aa-1e16-4dd1-b48c-197eaecd71f5	Excellent	شاعر المشاعر	##########			0	ar	us		5	ur	excellent	Positive	0	0	0
Google Play Store	b77ece8d-04bd-4571-bd6b-7ebe4b7f98dc	Excellent	عبدالله (ابو علي)	##########			0	ar	us		5	ur	excellent	Positive	0	0	0
Google Play Store	33d57f0c-212b-46e7-9e05-b393707a214f	Excellent	عبودي الحربي	##########			0	ar	us		5	ur	excellent	Positive	0	0	0
Google Play Store	16ad070a-3076-4dab-99df-269b96ad9844	Excellent	Abo Laith	##########			0	ar	us		5	ur	excellent	Positive	0	0	0
Google Play Store	369045f6-2e88-4379-b3b9-5a52176411f3	Excellent	حسن القرني	##########			0	ar	us		5	ur	excellent	Positive	0	0	0
Google Play Store	75bdebd7-1b56-45a0-8ac1-86ce23ee6b73	Excellent	محمد الخميس	##########			0	ar	us		1	ur	excellent	Positive	0	0	0
Google Play Store	fdd5d713-ba82-470b-a4da-e69635b9d648	Excellent	مجدي اليامي	##########			0	ar	us		5	ur	excellent	Positive	0	0	0
Google Play Store	1f2d6a56-5620-4f20-9aee-ba796e64c1ea	Excellent	عبدالله العلوي	##########			0	ar	us		5	ur	excellent	Positive	0	0	0
Google Play Store	f4ab2a7c-4d6d-415e-af80-c57b9df41217	Excellent	Yas Homa	##########			0	ar	us		5	ur	excellent	Positive	0	0	0
Google Play Store	ab67339f-1de8-46ab-a8a7-bd2ff802370e	Excellent	Mohamed ABDO	##########			0	ar	us		5	ur	excellent	Positive	0	0	0
Google Play Store	d8ca0a6a-2d5e-4c43-96df-cbfd104e73d3	Excellent	Abdullah Almomen	2022-07-06 00:30:00			0	ar	us		5	ur	excellent	Positive	0	0	0
Google Play Store	30c7e444-52b1-4afc-8fb1-2d7f05ec457a	Excellent	Saad Al.Asmary	##########			0	ar	us		5	ur	excellent	Positive	0	0	0
Google Play Store	0d56066c-10dc-4af8-be05-65fc51d1aa0b	Excellent	جابر الثقفي	##########			0	ar	us		5	ur	excellent	Positive	0	0	0
Google Play Store	caf2d565-e8d7-4ec5-b843-42532fdb0f3d	Excellent	ع ماد الع	##########			0	ar	us		5	ur	excellent	Positive	0	0	0
Google Play Store	ec83a7b9-c3ec-4b5d-8f97-c858311986bf	Excellent	Majed Alharbi	##########			0	ar	us		5	ur	excellent	Positive	0	0	0
Google Play Store	d662a5d0-4c58-4933-91d8-449b6d90ed40	Excellent.	Bader Alanze	##########			0	ar	us		5	ur	excellent	Positive	0	0	0
Google Play Store	ce5a8313-d671-450b-9fa1-ffc6837f70be	Excellent	ALHAMED	##########			0	ar	us		5	ur	excellent	Positive	0	0	0
Google Play Store	b10ae6f3-9139-4ccb-88e9-c29fb499a642	Excellent	ابو عبد الرحمن الحارثي	##########			0	ar	us		5	ur	excellent	Positive	0	0	0
Google Play Store	b9cfe4fb-dd1b-42fa-9abb-33269f8b0029	Excellent	Hommad Hakami	2022-04-01 09:50:00			0	ar	us		5	ur	excellent	Positive	0	0	0
Google Play Store	b55a9145-8902-48b3-bf5c-999e00dc47ab	Excellent	محمد الدوسري	##########			0	ar	us		5	ur	excellent	Positive	0	0	0
Google Play Store	c5247883-af1b-4158-b499-d06578a48573	Excellent	خالد الثبيتي	##########			0	ar	us		5	ur	excellent	Positive	0	0	0
Google Play Store	3895d3f3-6c1e-4d69-8bf7-be1a36e104bf	Excellent	حربي الحربي	##########			0	ar	us		5	ur	excellent	Positive	0	0	0
Google Play Store	28763b6f-2377-400d-8947-ada724629370	Excellent.	NAJE ALHABABI	##########			0	ar	us		5	ur	excellent	Positive	0	0	0
Google Play Store	95e6c885-286b-4748-8a7c-f4f8c263d91f	Excellent	محمد القحطاني	##########			0	ar	us		5	ur	excellent	Positive	0	0	0
Google Play Store	3feb365e-cca2-46fd-884e-cada2b075fcf	Excellent	ابراهيم دغريري (الشنب)	##########			0	ar	us		5	ur	excellent	Positive	0	0	0
Google Play Store	32ebf970-2cce-469c-b20c-43ed2cc2a0b4	Excellent	أبو عمر عبدالرحيم	##########			0	ar	us		5	ur	excellent	Positive	0	0	0
Google Play Store	f2cd97a7-af13-4b56-961d-b94b6730818f	Excellent	Azz Alallah80	##########			0	ar	us		5	ur	excellent	Positive	0	0	0
Google Play Store	b04b2c8a-386c-4ee3-98de-fb1d9fa1db0d	It does not work.	gazy a	##########			0	ar	us		5	sd	work	Negative	0	1	0
Google Play Store	4c339b45-f6b1-42f2-95fb-8b1b567f4b04	There	ahmed alkafa	##########			0	ar	us		1	sd		Neutral	0	0	0
Google Play Store	44cee2b7-bdc3-47dc-87ef-4151b9b3ef3b	Saib application is easy to use and its also too advance for online.	FATHIMA ZAHRA	##########			0	en	us		5	en	saib application easy use also advance online	Positive	0	0	0
Google Play Store	adfb6a13-ccc3-45c3-bbed-537afb1980e0	Good apk & bank	Mohammad Ajam Khan	##########			0	en	us		4	en	good apk bank	Positive	0	0	0
Google Play Store	fe902090-b2c4-4e64-8559-bbff8e4db640	Very bad	Ajay	##########			0	en	us		1	en	bad	Negative	1	0	0
Google Play Store	1beacafc-a88a-4276-932d-9ffdfddf318b	Iam too like	Ali Akkara	##########			0	en	us		5	en	iam like	Neutral	0	0	0
Google Play Store	88d1f256-c7ec-42bc-a92c-d5cb8d8a1711	App crashes and lags most of the time. The recent one was when I reactivated Flex Click; now I cannot login to my online account!	Hasan S	##########			3	en	us		2	en	app crash lag time recent one reactivate flex click login online account	Negative	0	1	0
Google Play Store	2c964bb6-bf0c-4354-81e2-7a8397e2ea05	The worst Banking app ever!!!!	Faisal al.Masaad	##########			0	en	us		1	en	bad bank app ever	Negative	1	0	0
Google Play Store	e8245700-42b2-4c42-b650-71f729142225	Good	Rafi Khan	##########			0	en	us		5	en	good	Positive	0	0	0
Google Play Store	5820824b-8a83-46d5-8143-4cc2d3473f74	Most of time the application is not working properly	Taheyat Al Mahozi	##########			0	en	us		1	en	time application work properly	Negative	0	1	0
Google Play Store	3b422c91-5c1a-4a78-acd5-02feb95bd8f5	I have never ever seen a banking app worse than this . Each step you made takes forever to load.	Muath Algohani	##########			0	en	us		1	en	never ever see bank app bad step make take forever load	Negative	1	0	0
Google Play Store	545bc0bb-4e88-4564-ab96-25003e9d9f45	The app's performance is subpar, and its user experience and interface are of poor quality.	Ahmed J.	##########			0	en	us		1	en	apps performance subpar user experience interface poor quality	Negative	1	0	0
Google Play Store	96cbee1e-f636-4ac6-af8e-f728d21c1787	Best investment app	sahaya jegan	2023-08-09 06:53:00			0	en	us		5	en	best investment app	Positive	0	0	0
Google Play Store	352ae841-493a-4af9-b1df-6aea94c40738	It has the be the worst Bank in the world. They took 50SAR from my account and after 3 months complaints they gave my back my money. However, when I opened the account the employee responsible for opening accounts was disrespectful and an uneducated first he refuse to open rhe account because he was tried and didn't sleep well that day and didn't like the way I look 😂😂 what a professional bank em…	Ahmad Mubarak	##########			1	en	us		1	en	bad bank world take sar account months complaints give back money however open account employee responsible open account disrespectful uneducated first refuse open rhe account try didnt sleep well day didnt like way look professional bank employ people would rather hold money bag rather open account	Negative	1	0	0
Google Play Store	10d30e87-e1f4-4d04-bfd3-a5f9d06a7f75	Bad application	bakor djeme	##########			0	en	us		1	en	bad application	Negative	1	0	0
Google Play Store	156fc5db-a7ad-42ab-80b8-f3562238490b	Excellent	MANOAR SK	##########			0	en	us		5	en	excellent	Positive	0	0	0
Google Play Store	86d45942-5ef1-4ce3-bd90-6608694cd629	Customers, especially first-time users, have a highly negative impression of this application. This app is not user-friendly, and it takes a long time to access all relevant financial services.	aflah cp	2023-08-02 06:31:00			3	en	us		1	en	customers especially firsttime users highly negative impression application app userfriendly take long time access relevant financial service	Negative	1	0	1
Google Play Store	efae10a8-d57a-4832-a887-4a4f68630e92	Bank send msg, automatic Account will Terminate by back because of No Transection,Your app Doesn't Work the how can i use to tansfer....one of the worst app never i have see before	Abdul Basith	##########			0	en	us		1	en	bank send msg automatic account terminate back transectionyour app doesnt work use tansferone bad app never see	Negative	1	1	0
Google Play Store	8cf6d41d-342d-4165-b498-7e0d4ca390fa	Not working, always crashing, useless, and extremely irritating.	Mohammed ibrahimo	##########			0	en	us		1	en	work always crash useless extremely irritate	Negative	1	1	0
Google Play Store	9fdd7c1b-5114-46b7-8675-11dfa066ba42	Very good	MOJAB KHALIL	##########			0	en	us		5	en	good	Positive	0	0	0
Google Play Store	4980a918-0769-443d-abea-e58dadad13ca	SAIB banking app is one of the best. But I hate demanding access to my location to allow logging into my account. LOCATION ACCESS should stop and be removed.	Store IT	##########			0	en	us		1	en	saib bank app one best hate demand access location allow log account location access stop remove	Negative	1	1	0
Google Play Store	4c72eb7a-ba57-4b53-842c-2e87dc85b84e	The new update doesn't work	Rayan ali	##########			0	en	us		1	en	new update doesnt work	Negative	0	1	0
Google Play Store	31f781e5-6ae2-4bab-80aa-6eabae9f2417	Awful Not responding I can't access my account Shame on u	Mahmoud Ali	##########			0	en	us		1	en	awful respond cant access account shame u	Negative	1	1	0
Google Play Store	bb429328-e6d5-4634-beda-4a7a3ec58f43	Good	Taju Deen	##########			0	en	us		5	en	good	Positive	0	0	0
Google Play Store	11d65d9c-9275-47db-ab6e-33fa3208b6eb	The app is having problems in the login page, and that why I gave it one star	fast stay	##########			0	en	us		2	en	app problems login page give one star	Negative	0	1	0
Google Play Store	ab5a8f07-19cb-4439-8277-34214f214a18	The worst	Faisal	##########			0	en	us		1	en	bad	Negative	1	0	0
Google Play Store	2d6dcdec-fbaa-426c-a18f-4fabace22d37	It doesn't work, I can't log in, useless app 👎🏻👎🏻	Rommel 21	2023-07-09 05:26:00			0	en	us		1	en	doesnt work cant log useless app	Negative	0	1	0
Google Play Store	677eb45b-71fa-4dba-999b-52cda836308d	Can't login. Please solve this issue	Mustafa Nihon	##########			0	en	us		1	en	cant login please solve issue	Negative	0	1	0
Google Play Store	6e4caa86-2549-4965-9c68-2cf2b4d4baaf	Can't login from app but can login normally from website it's getting worse	الشلوي ابو عمر	##########			0	en	us		1	en	cant login app login normally website get bad	Negative	0	1	0
Google Play Store	4dde8ebd-b802-4bc0-89b3-d9f5e1b5f7e3	Need better design	Fares King	##########			0	en	us		1	en	need good design	Neutral	1	0	0
Google Play Store	3b932997-a2fe-4fe2-94d4-2b9dc0cf2619	For the past week, the app has been malfunctioning and refusing to accept any longin , however, i am able to enter via web-browser, but in view only mode! This is a huge inconvenience	Jude Al-Masoud	##########			0	en	us		1	en	past week app malfunction refuse accept longin however able enter via webbrowser view mode huge inconvenience	Negative	0	1	0
Google Play Store	f56d9681-6f3d-40f6-880f-bf7b21553d1d	the app only goes from bad to worse, I'm closing my account because I can't even log in anymore and I can't use the app if VPN is active!	Mohanad Sharaf	##########			3	en	us		1	en	app go bad bad im close account cant even log anymore cant use app vpn active	Negative	1	1	0
Google Play Store	ffccb237-90a3-43ba-b588-efb88ab17b9b	Literally awful! Other banks apps getting better and smarter and this one getting worse with every update. I can't even login to my account!! Just save time and use web browser or better yet switch bank!	Ahmed Almusharraf	##########			9	en	us		1	en	literally awful bank apps get good smart one get bad every update cant even login account save time use web browser good yet switch bank	Negative	1	1	0
Google Play Store	9a4eda4e-efcc-470f-aec8-86f095954829	Works only thru wifi network to access my account, If i use my data it tells that I don't have active connection while all other apps working fine	Mohammed Ali	##########			0	en	us		2	en	work thru wifi network access account use data tell dont active connection apps work fine	Neutral	0	0	0
Google Play Store	73edde68-d776-474b-be58-5a69a31e4566	Slow, disfunctional. There is always an issue while using it.	Aziz .M	##########			1	en	us		1	en	slow disfunctional always issue use	Negative	0	1	1
Google Play Store	d3bfd4a1-ea2a-495d-86a4-c9361879b1c7	Worst UI experience...	mohamed eliyas	##########			0	en	us		1	en	bad ui experience	Negative	1	0	0
Google Play Store	50dc5d41-4d75-4713-9e7f-a57626c0c695	Worst application i have experienced.	Ahmad Raza	##########			0	en	us		1	en	bad application experience	Negative	1	0	0
Google Play Store	c0305de1-74fe-4f11-88c6-653507d691a2	Cannot login for two days in a row, without any notification from the Bank	Bassam AlRabie	##########			0	en	us		1	en	login two days row without notification bank	Negative	0	1	0
Google Play Store	a0aad5b6-aad7-43fd-85f5-51fc6f820a02	Cant login	Abdullah GH	##########			0	en	us		1	en	cant login	Negative	0	1	0
Google Play Store	cfc8974f-05eb-48ec-9b7e-5df8c4375fbf	Bad app. Always stop. Can't log in	Hakeem shubbar	##########			0	en	us		1	en	bad app always stop cant log	Negative	1	1	0
Google Play Store	bd196f70-dba9-4525-b218-bc4cb1c395ee	Doesn't work 90% of the time, very bad	MeshFish	##########			0	en	us		1	en	doesnt work time bad	Negative	1	1	0
Google Play Store	6707c3c9-9655-45b4-ac54-3a5470ae991a	One of the worst app ever, what a shame SAIB. Invest a little to develop your app for god sake, because this app shows you are careless about your clients.	Ahmed “Mido” Alnemer	##########			0	en	us		1	en	one bad app ever shame saib invest little develop app god sake app show careless clients	Negative	1	0	0
Google Play Store	8efb915e-8e29-4171-b5a2-5d938c9ebad4	This application not working since last update. Please resolve this issue.	Pervez Alam	##########			0	en	us		3	en	application work since last update please resolve issue	Negative	0	1	0
Google Play Store	7a052f19-d4fa-4e83-8162-16755a855975	What a shame , a web view app with a bad UI/UX and a lot of bugs, it freezes full one minute in each page when i try to transfer some money to the travel card, even the website version freezes 😂. I hope you reimplement real app ( not web view app). Update after a whole year 14-06-23 , finally, now they add new feature, location-permission-to-open🙆.	HaaasKN	##########			65	en	us		1	en	shame web view app bad uiux lot bug freeze full one minute page try transfer money travel card even website version freeze hope reimplement real app web view app update whole year finally add new feature locationpermissiontoopen	Negative	1	0	1
Google Play Store	da7defff-4d9b-49ef-bc11-72cf6d5de3ff	Can't log in fo 2 days in a row!! Other than the crashes! This is banking app. Can't afford such error	Sadeq Alkhalifah	##########			9	en	us		1	en	cant log fo days row crash bank app cant afford error	Negative	0	1	0
Google Play Store	a689e5ea-080c-47af-814d-fe64e302e586	Login issue	kaleem basha	##########			0	en	us		2	en	login issue	Neutral	0	1	0
Google Play Store	d773b04e-84d2-4a7d-9f90-400eb887ecb5	Its not open, whenever i try to open its showing you connect to VPN. But i don't have any VPN installed. Even uninstall and install again Manny Time. Use less.	Bilal Ahmed	2023-06-04 02:17:00			1	en	us		1	en	open whenever try open show connect vpn dont vpn instal even uninstall install manny time use less	Negative	0	1	0
Google Play Store	9be0c8e9-59b4-41fb-9a62-65e10869ead7	Iqama update is big problem bank go person told call you fleex call .but fleex call 10 time call otp is not coming call disconnect after 30mint 40 mint otp is coming last year same problem i have face not service is good	Muhammad Amir	##########			0	en	us		2	en	iqama update big problem bank go person tell call fleex call fleex call time call otp come call disconnect mint mint otp come last year problem face service good	Negative	1	1	0
Google Play Store	ef75c823-77ea-401c-997f-e1e7a6472f89	Great application , not complicated	Muaiad Bakhashwain	2023-06-02 09:28:00			0	en	us		5	en	great application complicate	Positive	1	0	0
Google Play Store	93ea46d1-a448-4586-9b17-69585ab67eda	I can't use the app. It crashes every time I want to login. Please fix it	Iceman	2023-06-01 00:58:00			0	en	us		1	en	cant use app crash every time want login please fix	Negative	0	1	0
Google Play Store	0526f199-4296-43c7-9091-8336afe88df1	It never open. Installed it several times but still not working. When it is open they till new phone you can not access your portal.	Barak	##########			1	en	us		1	en	never open instal several time still work open till new phone access portal	Negative	0	1	0
Google Play Store	213cdefd-efde-4520-8595-cf2f4254bae3	the crashing App	Ahmed AlHajri	##########			0	en	us		1	en	crash app	Negative	0	1	0
Google Play Store	de6c4259-4a95-41b7-9622-db404d8b7f05	App keeps getting crushed every time I open it.	Raeed Alharbi	##########			0	en	us		1	en	app keep get crush every time open	Negative	1	1	0
Google Play Store	2b4dd8e7-63da-4012-99ed-d3597e9d53ac	This app is crashing	hussein ahmed	2023-05-04 09:53:00			0	en	us		1	en	app crash	Negative	0	1	0
Google Play Store	2c60435d-2a31-4946-ad0d-358461f6cbc0	Very bad application it's so slowly	Hussain Alkhalifah	##########			0	en	us		1	en	bad application slowly	Negative	1	0	1
Google Play Store	64da6222-7c8b-48e2-8892-51d00438f4f5	It keeps crashing once I open it. I can't login! It's useless!!	Fatimah Alhamadeh	##########			3	en	us		1	en	keep crash open cant login useless	Negative	1	1	0
Google Play Store	09f417d2-1fd2-43c7-af1f-e8e51ea4a6ea	This app is getting worse and worse .. Crashes everytime i open it... Also cant use Wifi!! Fix it!!!!	Abdulkarim Alzahrani	##########			16	en	us		1	en	app get bad bad crash everytime open also cant use wifi fix	Negative	1	1	1
Google Play Store	3dbf0d0c-ad9d-4ff9-a623-bfc79cbe9647	Not working	Ebrahim	##########			0	en	us		1	en	work	Neutral	0	1	0
Google Play Store	3904033b-4e90-4171-a41e-9c0c504f34ca	App keeps crashing everytime I try to log in, this has been going since a month with no action from the developer	Mohammad Ali	##########			9	en	us		1	en	app keep crash everytime try log go since month action developer	Negative	0	1	0
Google Play Store	f6ba4306-42f2-4d7e-b06a-512aa9bbf383	Always having issues with login and lately it does not login at all.	Abdulmohsen Abdula'al	##########			4	en	us		1	en	always issue login lately login	Negative	0	1	0
Google Play Store	77e0ff79-366a-4fa3-ad46-d8c5cc57b1ab	Does Not Work	Mohammed Alsaad	##########			1	en	us		1	en	work	Negative	0	1	0
Google Play Store	aeda880d-d57e-4839-86e4-9dbcb5b1926c	The worst banking app I've used... It just keeps crashing everytime I try to log in	anandu pramod	##########			0	en	us		1	en	bad bank app ive use keep crash everytime try log	Negative	1	1	1
Google Play Store	d4770471-3ced-4bbc-972d-8d14337a86e1	Garbage	Axolotl	##########			0	en	us		1	en	garbage	Negative	1	0	0
Google Play Store	874948f2-7e33-4e26-b7d9-eeb5d1240d20	No more working after the last update	emad nasr	##########			0	en	us		1	en	work last update	Neutral	0	1	0
Google Play Store	2fb90808-fce6-4631-919e-c514bf5ed211	Not working	3bdullah Y	##########			0	en	us		1	en	work	Neutral	0	1	0
Google Play Store	20aed999-b256-43de-bf31-98064376f25c	Worst service ever.	shiju lal	##########			0	en	us		1	en	bad service ever	Negative	1	0	0
Google Play Store	5cd71630-463c-43df-beba-c10baf520006	Apps is hanging once try to login to my account	Monzer Osama	##########			0	en	us		1	en	apps hang try login account	Negative	0	1	1
Google Play Store	36e8a39e-c630-446f-9425-f5c83b64d77c	I am trying to login for the first time after opening the account. But it shows a yellow screen.	Jithin Mathew John	##########			2	en	us		1	en	try login first time open account show yellow screen	Neutral	0	1	0
Google Play Store	9800fe61-1d3b-45cd-99c8-f1ef9c697d88	The app is not working and not allowing me to fill my info to login	Abbas H.T	2023-04-06 05:39:00			3	en	us		1	en	app work allow fill info login	Negative	0	1	0
Google Play Store	c38b42a4-4d0a-4b23-bd26-e2f2dd219346	Since one week app is not working, When we try to login error shows Loading Pls wait after that "An error occurred. Pls try again Later. I uninstalls many times but the same issue. Admin Pls check	Mohammad Yahiya Khan	##########			9	en	us		1	en	since one week app work try login error show load pls wait error occur pls try late uninstalls many time issue admin pls check	Negative	0	1	0
Google Play Store	ab5c3194-ed96-4a59-a4a0-cfa694a59f4f	Low works	Xb Th	##########			0	en	us		2	en	low work	Neutral	0	1	0
Google Play Store	c0d0d599-381f-48a3-97b5-352f48ea7cee	terrible service, terrible and unoptimized app	Okay	##########			1	en	us		1	en	terrible service terrible unoptimized app	Negative	1	0	0
Google Play Store	ac9faaea-f141-439b-a916-48932e3fd7a5	This update not working with P30 pro	Muath Alghamdi	##########			0	en	us		1	en	update work p pro	Negative	0	1	0
Google Play Store	1ca72b33-83f0-47c8-8725-27894f79b156	Very slow and does not work most of the time	Ali Alkhazal	##########			1	en	us		1	en	slow work time	Negative	0	0	1
Google Play Store	769c7404-2bf8-42bb-93b4-3b2ff7f5f05d	The worst bank app in Saudi.	Abdulaziz Bin Zarah	##########			0	en	us		1	en	bad bank app saudi	Negative	1	0	0
Google Play Store	72211efb-43fa-45cc-9cb8-48d5ed88c41d	can't sign in	Abdul Kareem	##########			0	en	us		3	en	cant sign	Neutral	0	1	0
Google Play Store	cdc2df4e-4da2-4eb6-a948-cddc06480ff4	Verry useful bank	Mohammad Khan	##########			0	en	us		5	en	verry useful bank	Neutral	0	0	0
Google Play Store	7a568219-f4c8-4c2e-bda6-c8da735dc658	Very slow and keep crashing	Wasim Ansari	##########			0	en	us		3	en	slow keep crash	Negative	0	1	1
Google Play Store	e049b547-8ed8-48ca-9e22-fa3f1a3b2154	Good	mathavapriyan Maddy	##########			0	en	us		5	en	good	Positive	0	0	0
Google Play Store	e1809a69-7907-4523-86a2-8340dca24074	This mobile app is not working it says "your device doesn't have any available connection" but i can open my account when i search the app in google. To make it easy fo my online transactions i transfer all my money in my other bank account😆	Donna Marie G.	2023-03-05 08:57:00			0	en	us		1	en	mobile app work say device doesnt available connection open account search app google make easy fo online transactions transfer money bank account	Negative	0	1	0
Google Play Store	91821891-6e47-4649-a094-14e94452ed89	Not much improved however still better than before " Less crashes". I also have a suggestion about the travel card wallets, if you could add the option to hide the unused currencies that'd be a huge help. Because, sometimes it's kind of a headache to scroll all the way down to get to a specific one you need. Many thanks!!!	EMAD AHMED	##########			9	en	us		3	en	much improve however still good less crash also suggestion travel card wallets could add option hide unused currencies thatd huge help sometimes kind headache scroll way get specific one need many thank	Positive	1	1	1
Google Play Store	f4f4edbb-25b3-47c2-9f78-d237fe136a1a	Worst experience keep crashing everytime that i need to use it Please develop your app and make it real app for the system of the phone not linked with your website	Alone in the dark	##########			0	en	us		1	en	bad experience keep crash everytime need use please develop app make real app system phone link website	Negative	1	1	1
Google Play Store	f6d9010d-889f-4555-abc8-3bd6a996890c	Worst application I used in all my life, very bad performance, always crash, it is disaster if the developers are aware about all these issues and more disaster if they are not aware. Unfortunately I have to press at least one star to post. However, my rate is zero star	Maher Al Amoudi	##########			1	en	us		1	en	bad application use life bad performance always crash disaster developers aware issue disaster aware unfortunately press least one star post however rate zero star	Negative	1	1	1
Google Play Store	0b565b6c-20f7-4349-aa50-56dffed549fe	The most disastrous bank App I have ever seen. It crashes all the time. Now, while I am posting my review, it is not opening! Terrible experience!	The peaceful anonymous	##########			0	en	us		1	en	disastrous bank app ever see crash time post review open terrible experience	Negative	1	1	0
Google Play Store	d40c826b-c314-423a-800a-78e96b7c5e23	Shity app	Mohammed Alsayed	##########			0	en	us		1	ru	shity app	Negative	1	0	0
Google Play Store	327d97f2-9073-450f-a335-1a94b1d7b638	Very very very poor app that very slow and most of the time couldn't sign in 👎	ss_vuy vuy	##########			0	en	us		1	en	poor app slow time couldnt sign	Negative	1	1	1
Google Play Store	c6e529e8-66a1-4780-aafc-ef191d97773e	Worst app ever always crashing or under maintenance	Faisal Alfurayhidi	##########			0	en	us		1	en	bad app ever always crash maintenance	Negative	1	1	0
Google Play Store	f9968f84-f6f0-4cb4-8711-fca7f5f3d072	Very bad	BuMeshoz Troller	##########			0	en	us		1	en	bad	Negative	1	0	0
Google Play Store	dc045832-a12f-47d2-b484-f90a37cba83f	Keep Crashing, bad customers service especially when you stuck! since i have enrolled with this bank, i stopped adding more responsibility with them. The app and online services do not show the SWIFT when i try to transfer to any US bank, when I called, no one was able to help and they think you only need IBAN to complete the transfer! The whole bank needs fundamental update!	Roman Alz	##########			5	en	us		1	en	keep crash bad customers service especially stick since enrol bank stop add responsibility app online service show swift try transfer us bank call one able help think need iban complete transfer whole bank need fundamental update	Negative	1	1	0
Google Play Store	dae24718-969f-4d52-8eaa-55f8a8e9c8fd	Very bad	Ahmed Alsadah	##########			0	en	us		1	en	bad	Negative	1	0	0
Google Play Store	e81639ad-d7e9-497c-be47-fb521f1b104c	Flex safe no longer work it generates the code but never accepts it.	Abdallah Mohammed	##########			9	en	us		1	en	flex safe long work generate code never accept	Negative	1	1	0
Google Play Store	a4d787ba-ed52-49e2-b0e6-fb561be081f0	Very very poor service 🙂	GD 100	##########			0	en	us		1	en	poor service	Negative	1	0	0
Google Play Store	6eabbe9f-bdd3-4042-832b-5f37f3ecd2c6	The bank itself needs renovation apart from its apps and machines from top stupid management till the smallest teller with focus on the corporate stupid employees	Fix Me SA	##########			0	en	us		1	en	bank need renovation apart apps machine top stupid management till small teller focus corporate stupid employees	Negative	1	0	0
Google Play Store	f4021701-cbce-46d1-9d55-349a5446ae5c	Some error to open accounts personally visit bank but nothing happened	ziya ul haque	##########			0	en	us		3	en	error open account personally visit bank nothing happen	Negative	0	1	0
Google Play Store	cdd9bfb1-d7ea-4769-a46e-78fba593455d	Saib app is very slowly	Tausif Alam	##########			0	en	us		1	en	saib app slowly	Negative	0	0	1
Google Play Store	98525898-56a5-4c81-a8fc-ff8f44c4da0d	App not responsive	zeena mutheeb	##########			0	en	us		1	en	app responsive	Negative	0	0	0
Google Play Store	6221fe05-b5c6-4353-b205-4b7ee708fa80	The app became a slow and difficult to use	Abdul Razaq Alanazi	##########			0	en	us		2	en	app become slow difficult use	Negative	1	0	1
Google Play Store	199a009b-be84-42ca-8a7e-d8d2e4f20c29	The app keep crashing on android.	Soul King Brook	##########			1	en	us		1	en	app keep crash android	Negative	0	1	0
Google Play Store	23b87364-9a80-484a-886d-2470862a549a	Worst bank at so many level	Aldaleel M	##########			1	en	us		1	en	bad bank many level	Negative	1	0	0
Google Play Store	e295f2c9-d68e-4566-a82f-12b4e5557e4c	Online application is a joke from these guys.. Iqama has two names, passport has two names but these guys make it mandatory for 5 names. Their online application is completely bugged.. Although I don't think there is any descent bank in the entire Kingdom. You need to be rich to get service or you need "Wasta"	Mustang Vst	##########			0	en	us		1	en	online application joke guy iqama two name passport two name guy make mandatory name online application completely bug although dont think descent bank entire kingdom need rich get service need wasta	Negative	1	1	0
Google Play Store	a75dfced-6654-43a6-ae77-3ea62b0b4213	Poor and pathetic	Shaheer Ali	##########			0	en	us		1	en	poor pathetic	Negative	1	0	0
Google Play Store	28f7b349-bf31-448a-8ddd-7762a1980b43	Not working 😕	Nafea E	##########			0	en	us		1	en	work	Negative	0	1	0
Google Play Store	5568e2f1-ec87-4c1f-ab07-3fb5c4dc214c	Worst bank application ever.	9 Aqeelah	##########			0	en	us		1	en	bad bank application ever	Negative	1	0	0
Google Play Store	44a0470c-a48a-4fc6-9f52-1d0d11abdb3f	Bad app	Ali Sultan	##########			0	en	us		3	en	bad app	Negative	1	0	0
Google Play Store	0a8cbaee-5621-42d0-8ebe-bd817949666b	Doesn't work at all.	mohammed alshehri	##########			0	en	us		1	en	doesnt work	Negative	0	1	0
Google Play Store	ef3d0958-1a4c-4c35-ba9d-1c5f6dc02bf3	I can't login to my account. Bad experience with this application	Ali ٠٠	##########			0	en	us		1	en	cant login account bad experience application	Negative	0	1	0
Google Play Store	43e216e7-045c-4556-a37f-c5e6a232c06f	best bank app	Mansour Aldehaiman	##########			0	en	us		5	en	best bank app	Positive	0	0	0
Google Play Store	90a429c8-827e-4db1-a8c8-b1c4747837ff	Constantly crashes	Alanoud Alajaji (Anoosh)	##########			0	en	us		1	en	constantly crash	Negative	0	1	0
Google Play Store	b126c8c4-8b05-4d0b-b955-1e4439828be5	Pathetic app for a big financial institution	H. Mosa	##########			0	en	us		1	en	pathetic app big financial institution	Negative	1	0	0
Google Play Store	1eaea7e0-137a-4221-9a88-177f1ea205e4	App is not working when you use a secure per-app-vpn from mdm venders!!!!!!!!!	Abdulrehman	##########			0	en	us		1	en	app work use secure perappvpn mdm venders	Negative	0	1	0
Google Play Store	6be94718-1390-4359-b4d2-9bf2cf4e2e17	My roller consta..adventurous but all good to prevent money fraud	Raphael obeng	##########			0	en	us		5	en	roller constaadventurous good prevent money fraud	Neutral	1	0	0
Google Play Store	3749a531-ca41-46f6-a5c2-92492308fa3f	Tha app is very bad the worst bank app ever	B. A	##########			1	en	us		1	en	tha app bad bad bank app ever	Negative	1	0	0
Google Play Store	4dfdb821-b361-44ed-8fec-ba91d0e42014	Great application	Afzal Khan	##########			0	en	us		5	en	great application	Positive	0	0	0
Google Play Store	5bfc9039-c720-441a-a4f5-7aa211299c38	Trash	Talal A	##########			1	en	us		1	en	trash	Negative	1	0	0
Google Play Store	3133ce37-382a-4f9b-9911-0b9bbb1292c3	Very bad, very slow and laggy.	Saud Ishan	##########			0	en	us		1	en	bad slow laggy	Negative	1	0	1
Google Play Store	c6008f25-b6a3-43c8-896a-a963b3aada55	Very bad app crashes many and many times, run away	Amr Al Amri	2022-09-08 04:00:00			1	en	us		1	en	bad app crash many many time run away	Negative	1	1	0
Google Play Store	30f74b66-42fa-433f-b0d8-71ae293d96e5	It takes hours to open.	Abdulmuhsen Alkhaldi	##########			0	en	us		1	en	take hours open	Negative	0	0	1
Google Play Store	63c73265-3e85-4d71-a852-574f2d4e8927	This app is a waist of time ... please FIX it!!!!!	S Soll	2022-09-05 09:56:00			0	en	us		1	en	app waist time please fix	Negative	0	0	1
Google Play Store	1f0ad43c-b28d-462b-ac86-8bc6a337d48f	Always showing close vpn. Am not using any vpn apps.	shibin kp	2022-09-04 04:17:00			1	en	us		1	en	always show close vpn use vpn apps	Negative	0	1	0
Google Play Store	af16ac40-1083-42d1-9a86-29f6f7ead1b3	I have issue with the application that I can not access the program and thete is a message shown that your connection is not private. I have tried with another android device. Still same issue is exists. Please advise	Abdullah Alshammary	##########			7	en	us		2	en	issue application access program thete message show connection private try another android device still issue exist please advise	Negative	0	1	0
Google Play Store	5178c133-bd88-48c6-94bf-26df0b5eae58	every time I open app tell me you use VPN but I'm not using!!!	Mohamad Qoradi	##########			1	en	us		1	en	every time open app tell use vpn im use	Negative	0	1	0
Google Play Store	db430c58-ad04-4ce3-8e68-aa0a47107a26	Feature loaded app but very slow and gets hanged up all the time. After recent update on 2 sep its not even opening and asking to turn off VPN when there is none working in phone. Please fix bugs..	vikrant verma	##########			3	en	us		1	en	feature load app slow get hang time recent update sep even open ask turn vpn none work phone please fix bug	Negative	0	1	1
Google Play Store	a634477f-b95e-4ea0-953f-201d6e58671f	The application is always hanging during any process	الجوهرى	##########			0	en	us		1	en	application always hang process	Negative	1	0	1
Google Play Store	9bc45b47-bbb9-446d-85ba-aae87e14646b	Now I know why the low score, it keeps freezing for every transaction, shame on you to release such untested app	Dr. A Jefri	2022-09-01 08:43:00			1	en	us		1	en	know low score keep freeze every transaction shame release untested app	Negative	1	0	1
Google Play Store	b10ec056-5f02-43c6-a4dd-ec1a364baa10	I couldn't use the App I have to use PC	Abdulaziz Yahya	##########			4	en	us		1	en	couldnt use app use pc	Neutral	0	1	0
Google Play Store	03ac6112-144f-4081-bac8-6d2c62f0b1be	Very bad	MOHAMMED ALSUHALEE	##########			0	en	us		1	en	bad	Negative	1	0	0
Google Play Store	b7a36f53-ff83-4bac-bec2-e75e94a9ffc6	Everytime I try to load funds into my Travel Card, the app crashes!	Moad FJ	##########			5	en	us		1	en	everytime try load fund travel card app crash	Negative	0	1	0
Google Play Store	b9c055c6-b01e-4d38-88fc-019ddeacb951	Lots of crashes	المميز	##########			0	en	us		1	en	lot crash	Negative	0	1	0
Google Play Store	23d9b9ba-d011-41d5-b7c2-6e7d74110651	Horrible experience,I've been recommended this bank from relatives, Since the app is so janky I only use it occasionally, But in the few times I use it It's been horrible from the "no data to display" error when logging in, to the unnecessarily complex menus, to the annoying services they use "flex save","flex call","flex touch" it's a hassle trying to get a customer service employee on the phone…	Pumpkin pie	##########			11	en	us		1	en	horrible experienceive recommend bank relatives since app janky use occasionally time use horrible data display error log unnecessarily complex menus annoy service use flex saveflex callflex touch hassle try get customer service employee phone get flex call account firstsave time suffer avoid bank	Negative	1	1	0
Google Play Store	33e41b0b-991a-420c-9722-29fbfbf7d424	Application keeps crashes on all operations	Mohammed Basher	##########			1	en	us		1	en	application keep crash operations	Negative	0	1	0
Google Play Store	b12897ff-0d7c-4135-bc38-a4e519841601	Since the last update It worked for a while then now the app full of crashes. Please update and fix otherwise remove it from store to avoid bad reviews	Dr. Mohammed Al Manea	##########			2	en	us		1	en	since last update work app full crash please update fix otherwise remove store avoid bad review	Negative	1	1	0
Google Play Store	7f1904f1-70c4-474d-a86f-20adc1c2ad45	Very slow, it's freeze every minute.. U must work on that issue	Khaled Albloshy	##########			1	en	us		1	en	slow freeze every minute u must work issue	Negative	0	0	1
Google Play Store	1ebdb60f-9a31-4da4-8d11-2b24e9dc7aed	The app freeze when loading travel card	alzaeemdot	##########			0	en	us		1	en	app freeze load travel card	Negative	0	1	1
Google Play Store	b59b3a31-d06e-4998-9ca3-c1167156baf4	The worst bank app ever	YAZED SALEH	##########			0	en	us		1	en	bad bank app ever	Negative	1	0	0
Google Play Store	dde13024-c3f3-4615-8593-07737aeb3881	Very very bad app. Always not responding and it's worth mentioning a bad bank too	Yamen Mohammed	2022-08-09 02:28:00			2	en	us		1	en	bad app always respond worth mention bad bank	Negative	1	0	0
Google Play Store	f5d7c29b-be7e-4b44-9097-353c4ef5155a	It tells me iam on VPN but iam not is this a technical issue	Yuri Lowwr	2022-08-08 06:24:00			1	en	us		2	en	tell iam vpn iam technical issue	Negative	0	1	0
Google Play Store	067c79ba-c8da-4d6b-9586-712fc1f5d9d2	Good app	Ar S	2022-08-05 07:04:00			0	en	us		5	en	good app	Positive	0	0	0
Google Play Store	5825d8cd-728f-4729-bae6-13619440d95d	Develper needs to work on performance, bandwidth, hosting server should be change to faster server. And lots of thing. I faced an issue while transferring international or local beneficiary with low balance. I shocked because it takes me in all process then I received OTP too. After that I saw error message "you don't have sufficient balance " I should be while entering amount popup with error no…	Mohammed Asif	##########			17	en	us		2	en	develper need work performance bandwidth host server change fast server lot thing face issue transfer international local beneficiary low balance shock take process receive otp saw error message dont sufficient balance enter amount popup error sufficient balance check like bug solve issue	Negative	1	1	1
Google Play Store	03f3acec-1d22-4da8-9272-f56ddc44d42d	Need improvement and to add new modem data and style	IBRAHIM	##########			1	en	us		1	en	need improvement add new modem data style	Neutral	1	0	0
Google Play Store	c2785279-8667-4965-8cf0-39d2bd4ddc47	Comparing to other banking apps, it is the worst app I have ever used 👎	Ahmed Allahyani	2022-08-02 08:38:00			0	en	us		1	en	compare bank apps bad app ever use	Negative	1	0	0
Google Play Store	28a56d3b-18b8-4541-a3f6-4a0a8a0ddd25	Very slow	Azam Aln3im	##########			0	en	us		1	en	slow	Negative	0	0	1
Google Play Store	46eed6dd-fa71-482c-a61b-54565f177b86	app not working!!	Mohammed Husainawi	##########			1	en	us		1	en	app work	Negative	0	1	0
Google Play Store	1ce7bb84-f057-4455-a648-a5d52c10be59	Freeze like hell please fix cant do anything and i have to access from a browser to finsh wht i want	Sari Tonkr	##########			1	en	us		1	en	freeze like hell please fix cant anything access browser finsh wht want	Negative	0	1	1
Google Play Store	ccd6984c-e706-4dff-9797-f75c3f0e0dcc	It has been 4 months since I uninstalled the app, still seems like they don't care at all about their customers feedback, the app is now rated one star and they are not doing anything about it, lowest rating along all ksa banks !!! I'm moving to another bank just because of the horrible app experience. What a shame.	ilyes yacine	##########			5	en	us		1	en	months since uninstalled app still seem like dont care customers feedback app rat one star anything low rat along ksa bank im move another bank horrible app experience shame	Negative	1	0	0
Google Play Store	1f3b2013-2a76-443d-a7c2-89546bbc540b	The worst bank in responding. If you want talk or complain you should to put one or two hours of your time to talk by phone.	saad almarri	##########			0	en	us		1	en	bad bank respond want talk complain put one two hours time talk phone	Negative	1	0	0
Google Play Store	5e7eb153-3008-4203-acf1-794f4e3793ad	App crashes when you try to load travel card.	Bismuth	##########			1	en	us		1	en	app crash try load travel card	Negative	0	1	0
Google Play Store	d7f319d9-c8a2-4aae-bb45-4c231b56a8e7	The app is super slow and unresponsive and keeps crashing, the current state of the app is UNUSABLE whatsoever and that is totally unacceptable from a well respected bank in the kingdom. Please learn from Rajhi app dev team a thing or two	LateNite	##########			6	en	us		1	en	app super slow unresponsive keep crash current state app unusable whatsoever totally unacceptable well respect bank kingdom please learn rajhi app dev team thing two	Negative	1	1	1
Google Play Store	0295a31a-7376-4e80-9adc-e27d9f6d1f3a	Hanging out, doesn't work properly, very very slow	Mohamed Abdelhamid	##########			0	en	us		1	en	hang doesnt work properly slow	Negative	1	1	1
Google Play Store	63082f67-135f-47fd-8834-ca6676d16cf8	Lagging and crashing too often.	Sultan Alkhodair	##########			6	en	us		1	en	lag crash often	Negative	1	1	0
Google Play Store	50f45b4f-0fb2-4c64-8066-56cad12a8973	Trash app .. freezing during the transfer to the travel card .. not good	Mohammed Almutawa	##########			3	en	us		1	en	trash app freeze transfer travel card good	Negative	1	1	1
Google Play Store	d9936af2-6b38-49da-9d02-224325572d67	A bit slow	Aziz Al-Rashoudi	##########			0	en	us		3	en	bite slow	Negative	0	0	1
Google Play Store	769d3673-e330-4a2d-9d6d-e2ac506c4d67	Very bad app	sealovex2	##########			0	en	us		1	en	bad app	Negative	1	0	0
Google Play Store	2f4d3455-eff4-42c4-8c3e-a75c55b8bdef	Frezing & Crashing... Do somthing!	Naa Aqq	##########			0	en	us		1	hi	frezing crash somthing	Negative	0	1	0
Google Play Store	ebc6426c-5c83-47a6-8188-31cd105ec442	constantly crashing when trying to transfer funds to travel card	Yazeed K	##########			1	en	us		1	en	constantly crash try transfer fund travel card	Negative	0	1	0
Google Play Store	217d4c21-24e9-4ac2-91eb-1804d01dec33	Freeze every time	Musab Alomair	##########			0	en	us		1	en	freeze every time	Neutral	0	0	1
Google Play Store	536e4429-d3cd-4b92-973d-c3f2c6ee1375	Very bad app	asaaa asa	##########			0	en	us		1	en	bad app	Negative	1	0	0
Google Play Store	94206737-cdbc-4537-a4fd-7f3738baf3eb	The worst Bank application. always freeze..no customer service response to improve their application	Dr.Yousef Almohammadi	2022-07-06 09:20:00			4	en	us		1	en	bad bank application always freezeno customer service response improve application	Negative	1	0	1
Google Play Store	464514a4-0558-44b4-97fa-14781d7a4c69	Keeps crashing every time I try to add funds to the travel card. Really disappointing. This has been a problem for at least 7 months now. Does this bank have management that knows what's going on?	Ali S	2022-07-06 00:37:00			15	en	us		1	en	keep crash every time try add fund travel card really disappoint problem least months bank management know whats go	Negative	1	1	0
Google Play Store	4709e0f7-abc1-4ef5-9ecc-4fa1d418f3e3	Craziest app	Idnan Ejaz Mer	##########			0	en	us		1	en	crazy app	Negative	1	0	0
Google Play Store	f93d3edf-fabd-4f12-8741-9aa6a136c13a	Nice bhai	Irfan RAJPUTGaming	##########			0	en	us		5	hi	nice bhai	Positive	0	0	0
Google Play Store	55f7f6aa-9824-4165-bcfc-6cb9bc250fa5	Lags alot in travel card page	m m	##########			0	en	us		1	en	lag alot travel card page	Negative	1	0	0
Google Play Store	d8c4c5be-4ada-4979-8b99-53e3b0229d86	It was perfect but now it freezes a lot, I cannot add money to the wallet !!. If not fixed soon I believe SAIB will lose customers.	Mohammed Almanea	##########			1	en	us		1	en	perfect freeze lot add money wallet fix soon believe saib lose customers	Negative	1	0	1
Google Play Store	415e8b4b-7a1d-4c06-8899-0de873c68a98	Bad service , no feed back to the client, branch employees didn't help me to solve my issue and no answer back	abdullah alwarthan	##########			1	en	us		1	en	bad service fee back client branch employees didnt help solve issue answer back	Negative	1	1	0
Google Play Store	8a720647-49e7-4522-9a4d-4c08dcc2cfb4	I do not know what happen to thier app? Its became the worest and have alot of lags and slower respond .	Muhannad Alkathiri	##########			5	en	us		1	en	know happen thier app become worest alot lag slow respond	Negative	1	0	1
Google Play Store	e29f3923-ba8c-4ba3-bde4-ea02d82818ca	App keeps crashing	Khalid A	##########			2	en	us		1	en	app keep crash	Negative	0	1	0
Google Play Store	1dcbd3dd-467e-46e8-9b16-138604833acf	It freezes most of the time. Neet to be looked at again as the issue is annoying.	Ahmad Albin Hamad	##########			5	en	us		1	en	freeze time neet look issue annoy	Negative	1	0	1
Google Play Store	71a24f3b-f161-4ec6-a25b-ff84f19e601b	Laggy	The Marvel	##########			0	en	us		1	en	laggy	Neutral	1	0	1
Google Play Store	53a48a74-63fb-4996-b4d5-36e157717bbe	It keeps crashing and freezing... What a shame...	Hani Bafayad	##########			5	en	us		1	en	keep crash freeze shame	Negative	1	1	1
Google Play Store	e40e3c46-6ed8-4dab-9ad9-d581c90a6d99	Excellent Banking service provided	immam atco	##########			0	en	us		5	en	excellent bank service provide	Positive	0	0	0
Google Play Store	41611e4b-2289-434f-838d-aa9de16c7109	Laaaaaaaaag	Ahmed AlSayegh	##########			0	en	us		1	nl	laaaaaaaaag	Neutral	1	0	0
Google Play Store	c0e9f92c-6039-427d-8103-0c5087993a92	Buggy app, lots of massages saying SAIB is not responsive. Adding to that verrrrrry Slow app. Please update it and fix these ISSUES.	Abdullah Wali	##########			5	en	us		1	en	buggy app lot massage say saib responsive add verrrrrry slow app please update fix issue	Negative	0	1	1
Google Play Store	f0c11941-0570-4546-8782-26de03b8d105	What to say!! The app freezes with every single step!!	Omar AlMedad	##########			3	en	us		1	en	say app freeze every single step	Negative	1	0	1
Google Play Store	db93f310-00a5-499d-944b-31c1fd4fee6b	Keeps crashing	Maliha Hussain	##########			0	en	us		1	en	keep crash	Negative	0	1	0
Google Play Store	0a81e7db-eb04-44c9-9a88-ed2ff9b5ad25	Crashes A LOT	Salman	##########			0	en	us		1	en	crash lot	Neutral	0	1	0
Google Play Store	5f1d8aac-467f-4e0c-b60f-f871c66a043b	So many bugs involved in the last updates	FOUAD ALDOSSARY	2022-06-05 05:24:00			0	en	us		1	en	many bug involve last update	Negative	0	1	0
Google Play Store	680c707f-6c1d-40e6-a351-595800066815	It need a lot to be good app , it has a lot of discrepancies	Abdulkhaleg Alqarni	2022-06-04 04:21:00			1	en	us		1	en	need lot good app lot discrepancies	Negative	1	0	0
Google Play Store	e2f2b474-5500-44e9-b6ee-a6517e424241	Slow, crashes a lot	Tamer Ahmed	##########			0	en	us		1	en	slow crash lot	Negative	0	1	1
Google Play Store	8f1ce176-b13e-4349-a5cf-842ae8ee6239	Gletches too much	maher zahrani	##########			0	en	us		1	en	gletches much	Negative	0	0	0
Google Play Store	4f12088e-645a-4df0-ac91-750a93aa58d1	The bank is amazing but the application has VERY poor performance, keeps freezing during important transactions.	Mon Jol	##########			0	en	us		1	en	bank amaze application poor performance keep freeze important transactions	Negative	1	1	1
Google Play Store	5c10758f-4443-4d91-93b9-c137915c9af9	It has a virus	faisal alsuliman	##########			1	en	us		1	en	virus	Negative	1	1	0
Google Play Store	2f8f594e-f0de-432b-a344-073f7fda06b1	Full of bugs	Rayan barakati	##########			1	en	us		1	en	full bug	Negative	0	1	0
Google Play Store	5e5e5c92-5d83-4412-a3da-30a84eac9105	Has malware in it	Yousef S	##########			1	en	us		1	en	malware	Negative	0	1	0
Google Play Store	608cf0b7-0a07-43cd-8edd-3d7bd1b00f2e	Carsh when unloud my money on travel card	MAX. RAY	##########			1	en	us		1	en	carsh unloud money travel card	Neutral	0	1	0
Google Play Store	1c365622-38a4-4a45-a18e-11a6942d3e8a	Very bad app	Saleh Alsaeedi	##########			1	en	us		1	en	bad app	Negative	1	0	0
Google Play Store	eae4dcd4-679d-45a4-aa35-9c3cecddd9f7	Poor experience...hope to fix issues soon	Ahmed Al Abd Alnabi	2022-05-09 07:34:00			2	en	us		1	en	poor experiencehope fix issue soon	Negative	1	0	0
Google Play Store	8f090945-da9b-430e-9199-be640f7e2bd3	The app isn't working probably	Mohd Almana	##########			1	en	us		1	en	app isnt work probably	Negative	0	1	0
Google Play Store	6b906626-d9d8-49bb-bdd9-1c9c93b347b2	Same like others I received warning message to delete the app due to contains malware and still no response from the bank to solve this issue	Salem Alshehri	##########			1	en	us		1	en	like others receive warn message delete app due contain malware still response bank solve issue	Negative	0	1	0
Google Play Store	ad937deb-cd52-45a4-9de7-8f2932190631	Flexsafe is not working?!?!	haz	##########			1	en	us		1	en	flexsafe work	Negative	0	1	0
Google Play Store	21034eef-ede8-4a1a-bbd0-453f89e7581b	Your app is infected by malware and you did nothing until now!	Khalid Al-Ghamdi	2022-05-03 06:55:00			1	en	us		1	en	app infect malware nothing	Negative	0	1	0
Google Play Store	3f319fed-fa1b-4f5e-a194-688dc397a7c1	A complete waste of time and effort. SIMPLY DOES NOT WORK ZERO STAR	Dr. Abdullah Almuttiri	##########			3	en	us		1	en	complete waste time effort simply work zero star	Negative	1	1	0
Google Play Store	2e55b84b-a28a-4dee-b300-cb4bf8fff267	Not good	Ali S Al-Saeed	##########			1	en	us		1	en	good	Negative	0	0	0
Google Play Store	2bf5d0ad-849f-41bd-b4cf-04e16bc532f1	Excellent I m feeling relaxed after Dowland this app they save my time	Umar Wakeel	##########			0	en	us		5	en	excellent feel relax dowland app save time	Positive	0	0	0
Google Play Store	c1220e2c-e98f-4a10-81fb-397127bd8892	Worst banking experience ever(Laggy)	Nasser Alabdulkarim	##########			1	en	us		1	en	bad bank experience everlaggy	Negative	1	0	0
Google Play Store	2cac0c27-a366-4f4f-a232-56dde0e2f21f	I Don't know why saib dosen't want to update app to be excellent. Google Play send me saib has malware	NASSER	##########			3	en	us		1	en	dont know saib dosent want update app excellent google play send saib malware	Negative	1	1	0
Google Play Store	b277a071-532f-4a2b-a422-afe24f58e0d6	Too much ag and half the services are pretty confusing	basil mohammed	##########			4	en	us		1	en	much ag half service pretty confuse	Negative	1	0	0
Google Play Store	9701c06c-a9bf-423d-81f8-72fe0b031053	This app has malware my anti virus recommend me to uninstall this app	Balaji Velayutham	##########			2	en	us		1	en	app malware anti virus recommend uninstall app	Negative	0	1	0
Google Play Store	e11dc37c-c6d5-4fdc-bed4-fbd6bbf00979	Malware	Em Alghamdi	##########			2	en	us		2	en	malware	Neutral	0	1	0
Google Play Store	8e1e9467-db08-41e3-b0b5-f48474f773ba	Full of bugs. Freezing all time	Abdullah Aljebreen	##########			1	en	us		1	en	full bug freeze time	Negative	0	0	1
Google Play Store	5ef59c23-9295-4e0f-8ad8-4ba3f7528bf4	Trojan !!	Khalid Alkathiri	##########			2	en	us		1	en	trojan	Neutral	0	1	0
Google Play Store	d80ef45d-fb45-404b-8ffb-5ce7474092d3	Last update shown it may has a virus 😐	AnAs Balkhair	##########			3	en	us		1	en	last update show may virus	Negative	0	1	0
Google Play Store	c3a5b2e9-6333-4704-ad0f-e081ae957d7b	There is Trojan virus issue when I try to update it.. should I uninstall the app ??	zien	##########			2	en	us		2	en	trojan virus issue try update uninstall app	Negative	0	1	0
Google Play Store	74cfdb0f-8b06-4267-891d-78cb52b0e14d	Virus in the application !!!!	Rashad Abdulghani	##########			2	en	us		1	en	virus application	Negative	1	1	0
Google Play Store	25e361e3-6465-4119-90ac-a67a1594b075	This last update. I got a warning from Google play about threat, can't trust the app. not secure! +in regard to past app experience. App offers alot features to manage your account. However, not smooth and too many errors when making different actions.	Ibrahim	##########			5	en	us		2	en	last update get warn google play threat cant trust app secure regard past app experience app offer alot feature manage account however smooth many errors make different action	Negative	0	1	0
Google Play Store	91c7e8bc-6b9b-404c-9701-aed0fc091155	My phone flagged this app as a Malware becareful	様バッグ	##########			3	en	us		1	en	phone flag app malware becareful	Negative	1	1	0
Google Play Store	53dad067-39fd-45ca-827d-8d485eee9444	Latest version has malware in it (Aprl 2022)	Abdul Aziz Al Subaiee	##########			3	en	us		1	en	late version malware aprl	Negative	0	1	0
Google Play Store	b1e47b79-f5a4-4833-96f0-7ad7926873bd	Very slow and crashing in the last weeks.	Maher	##########			1	en	us		2	en	slow crash last weeks	Negative	1	1	1
Google Play Store	1fd44486-974c-49c9-9308-c478860e239c	bad banking experience & application	khalid Omran	##########			2	en	us		1	en	bad bank experience application	Negative	1	0	0
Google Play Store	40d00d4b-d1a0-4c01-a389-f2b90574ecac	Once I uodated the app, got the anti-virus warning ⚠. This update contains malware and malicious software.	Ibrahim SH	##########			29	en	us		1	en	uodated app get antivirus warn update contain malware malicious software	Negative	0	1	0
Google Play Store	21d98fc8-c9cf-4d96-a3ae-e797fa57352e	When I tried to update the app from Google play as there was a new version, the phone detected a Trojan Virus!!! I uninstalled it immediately	AHMAD ALOTHMAN	##########			43	en	us		1	en	try update app google play new version phone detect trojan virus uninstalled immediately	Negative	0	1	0
Google Play Store	f182875f-c26f-4534-a69e-55fed559ede7	Very poor design and lags a lot. It's a great bank but sadly it has the worst bank app I ever used. I recommend them to put more effort into it because everything is digital!	abdul bin	##########			37	en	us		2	en	poor design lag lot great bank sadly bad bank app ever use recommend put effort everything digital	Negative	1	0	0
Google Play Store	bcf5c886-07a4-4c18-9920-26e1e066b5bc	Good	safdar ali	##########			0	en	us		3	en	good	Positive	0	0	0
Google Play Store	83d85820-0587-4169-bab2-72a3d0115918	The app constantly crashes when trying to load funds to my Travel Card. It's useless I rather use the website then this.	Anas Barack	##########			3	en	us		1	en	app constantly crash try load fund travel card useless rather use website	Negative	1	1	1
Google Play Store	634021d6-64ac-451c-90de-6ad619746684	What happened was working fine, now not responding...i can't load up funds in my travel card ..the app is not responding and i get error. Fix it plz	brave gari	##########			4	en	us		1	en	happen work fine respondingi cant load fund travel card app respond get error fix plz	Negative	0	1	0
Google Play Store	bb574110-0238-43d4-a25e-2c495948a728	Alot of lagging and crash, worst bank app	Ziad Almanea	##########			2	en	us		1	en	alot lag crash bad bank app	Negative	1	1	0
Google Play Store	de140d71-cafb-4bc8-be1b-d6419be2b202	It hangs and crashes alot recently!	Ahmed T. Fouly	##########			3	en	us		2	en	hang crash alot recently	Negative	0	1	1
Google Play Store	937ba7c7-64e1-471c-aeca-c25eff8e6e5b	It used to be good but in the last few weeks it started to crash with no reason .. it became totally useless unfortunately. I hope you fix it soon as it's unusable anymore !	Abdulraheem Hasan	2022-04-09 01:24:00			6	en	us		2	en	use good last weeks start crash reason become totally useless unfortunately hope fix soon unusable anymore	Negative	1	1	0
Google Play Store	4434b710-03d3-4150-b550-76d5ae285d53	Works half of the time	Mahmoud Albooq	2022-04-07 09:47:00			2	en	us		1	en	work half time	Neutral	0	1	0
Google Play Store	39126343-0dcd-4f59-a751-900569091d4b	The app keep crashing on andriod, Uninstaller and install many times. Still no success.	MrT 966	##########			3	en	us		1	en	app keep crash andriod uninstaller install many time still success	Negative	0	1	0
Google Play Store	bec24eef-8764-4dd1-9093-0ae8adb1983a	the app doesn't even let you log in for 95% of the time	Eslam Elsagher	##########			1	en	us		1	en	app doesnt even let log time	Negative	0	1	0
Google Play Store	76ca635b-c8d5-4d6e-b387-c07ea4185334	Good App	khaled samir	2022-04-04 08:26:00			0	en	us		5	en	good app	Positive	0	0	0
Google Play Store	fe93ac43-1ff7-4003-945c-1b6cebf4f07e	Good experience	Anish Kumar	2022-04-02 01:48:00			0	en	us		4	en	good experience	Positive	0	0	0
Google Play Store	57c7b8d1-6137-41d9-a392-cc35d650554d	The worst bank app . Hang most of the time My phone is new and updated	Mahmood Al-Hakeem	##########			1	en	us		1	en	bad bank app hang time phone new update	Negative	1	0	1
Google Play Store	7d1bbd9b-e961-457c-9eac-4d93e649befa	stupid application always hungging	Mansour Zughbi	##########			2	en	us		1	en	stupid application always hungging	Negative	1	0	1
Google Play Store	4d08396c-8e55-466b-9a8f-7b88d86ad8c9	It's been two weeks since the last time I be able to use the app properly. Now it's barely shows the balance and that's it. You won't be able to do something else.	Hussam Al-Salman	##########			5	en	us		1	en	two weeks since last time able use app properly barely show balance thats wont able something else	Negative	0	1	0
Google Play Store	250732e5-842d-419a-aabf-020345e873ae	Can't add money on visa Take long time to processing Please fix it ASAP.	Ali Ahmed	##########			2	en	us		1	en	cant add money visa take long time process please fix asap	Negative	0	1	1
Google Play Store	938c129b-5090-40cc-8d6f-230d4db2ccd5	Performance is not good.. Always issues with signing in.. Crush more frequently	Saleh Alshayea	##########			2	en	us		1	en	performance good always issue sign crush frequently	Negative	1	1	0
Google Play Store	db658e25-03e4-4131-8dda-28125813e75c	Poor app not look like an bank app and crush many times	Mohammed RudaiN	##########			2	en	us		1	en	poor app look like bank app crush many time	Negative	1	0	0
Google Play Store	2a8c21c1-0073-410d-a050-249dfc0ca876	Good	ACTIVE FAHAD	##########			0	en	us		5	en	good	Positive	0	0	0
Google Play Store	40e249ef-0bb8-4590-96a5-d027d194d5ca	Bad app experience	abdulrhman Al-Melhem	##########			2	en	us		1	en	bad app experience	Negative	1	0	0
Google Play Store	29129723-933d-4fc4-ab6c-9c6b1357bf2f	Outdated and laggy application	Soul G	##########			2	en	us		1	en	outdated laggy application	Negative	1	0	0
Google Play Store	79826b39-ebe1-4f57-aa44-875eff07e4a4	App doesn't respond after successful login it takes around 40 to 50 seconds to respond..please fix this issue	Anees Ur Rahman	2022-03-06 07:34:00			4	en	us		1	en	app doesnt respond successful login take around second respondplease fix issue	Negative	0	1	0
Google Play Store	fef170b1-151a-478f-b3c1-f92d165fd59b	Very bad apps hangs on u.. the log in is a torture by itself.. considering seriously changing my bank..	Mujahid Aldhaif	##########			3	en	us		1	en	bad apps hang u log torture consider seriously change bank	Negative	1	0	1
Google Play Store	b47b2e12-0d18-4476-b429-8d5c73753f55	Poor algorithm. Slow. Freezes. Bugs, Bugs, and Bugs.	Hatim	##########			3	en	us		1	en	poor algorithm slow freeze bug bug bug	Negative	1	1	1
Google Play Store	e8685c37-d4c3-4779-b6c1-a5584c62b424	Worst app ever, every week we received a maintenance message, yet the performance still very bad, too many lag and difficulties to move from page to page. SAIB should work harder fixing basic issues. I'm literally thinking of moving to another bank, if the bank cannot satisfy their customers.	Mohamed Ak	##########			19	en	us		1	en	bad app ever every week receive maintenance message yet performance still bad many lag difficulties move page page saib work hard fix basic issue im literally think move another bank bank satisfy customers	Negative	1	1	0
Google Play Store	d520008e-d14d-44a2-a1b8-7da684b9a190	good	fazil	##########			1	en	us		4	en	good	Positive	0	0	0
Google Play Store	890551b0-9d05-4e4b-ae31-6a4eebda3760	Very slow. It lags alot	Ahmad alnafisah	##########			2	en	us		1	en	slow lag alot	Negative	0	0	1
Google Play Store	3500d04c-d2b4-46c6-993c-b31ae752dddd	Doesn't work mostly, Slow, Lagging.. Very bad app in general.	No Regrets	##########			3	en	us		1	en	doesnt work mostly slow lag bad app general	Negative	1	1	1
Google Play Store	c638c278-074e-47b8-aa2a-3a5925befd0a	Always showing internet connection not available whereas connection is available.	Attiq Ur Rehman Qureshi	##########			2	en	us		1	en	always show internet connection available whereas connection available	Negative	0	1	0
Google Play Store	40a2143f-a182-40a8-90a8-2c53fde8eb23	Hanging	Mohammed Salah Alkhalaf	2022-01-03 05:08:00			1	en	us		1	en	hang	Neutral	0	0	1
Google Play Store	d8b39e90-57a2-4861-88f7-9ccf125969f6	Satu produk Google	mis roni	##########			0	ar	us		5	id	satu produk google	Neutral	0	0	0
Google Play Store	99b01ac4-6ec6-4e58-9c82-dafd0dc585d0	Abade Grwi	ALBERINS999	##########			0	ar	us		5	en	abade grwi	Neutral	0	0	0
Google Play Store	7dee9b9a-2784-4252-a3f2-ceec56b80437	Very bad , I can't open my account , I can't get the code message, I will close this account	Jamal Nassar	##########			1	ar	us		1	en	bad cant open account cant get code message close account	Negative	1	1	0
Google Play Store	43c936ca-d2e2-4642-8030-05518665edfd	Good	بدر عبدالله	##########			0	ar	us		5	en	good	Positive	0	0	0
Google Play Store	ef3721cf-d0f4-4934-a7f2-1ce2a7060ba9	Misroni	mis google	##########			0	ar	us		5	ms	misroni	Neutral	0	0	0
Google Play Store	528b8f8d-6815-45c7-bafb-09a2105d7a84	Bad	‪Eid _111 “Eid _111” Zzz‬‏	##########			0	ar	us		5	en	bad	Neutral	1	0	0
Google Play Store	d8a4e3a2-8361-461f-907a-564462632ac4	SAIB 100%	برق رعد صاعقة طيارة حربية مدرعة مرعبة 100%	##########			0	ar	us		5	hmn	saib	Neutral	0	0	0
