# Supplementary material for: Retrieval-augmented generation analysis of user reviews in Saudi mobile banking apps: a comparative user experience study of iOS and Android
Source: PeerJ journal article supplement (doi:10.7717/peerj-cs.3565), 2026-02-06
Supplement: iOS.zip [file Albilad-App_Bank_final.xlsx]

## Sheet: Sheet 1 - Albilad-App_Bank_fina
Albilad-App_Bank_final
source	app_name	review_id	review_description	en	cleaned_reviews	Sentiment	ï»¿source	user_name	review_date	review_title	developer_response	developer_response_date	thumbs_up	language_code	country_code	Satisfaction	Effectiveness	Efficiency
App Store	Albilad	b530cf7d-c352-47d4-9aae-72150a411606	Do you have a problem with the application? Fix it.	ar	problem application fix	Negative	App Store	ممراجع	7/26/22 16:04	مشكلة				en	ca	0	1	0
App Store	Albilad	95ba667d-1d49-4481-bc1e-aa9d1db7a6f8	The application does not work with the iOS operating system and works from a regular computer.	ar	application work ios operate system work regular computer	Negative	App Store	Ahmed Mohamed Nabil	5/5/23 20:34	التطبيق لا يعمل				en	eg	0	1	0
App Store	Albilad	1094ccf5-92b8-49d2-8612-5ed75e85676a	The application is not working at all and I have been unable to log into my account for a month.	ar	application work unable log account month	Negative	App Store	yasser adib	12/10/22 7:35	لا يعمل				en	eg	0	1	0
App Store	Albilad	b1fb91f5-d6c9-4307-9b82-30277d02ae30	the worstapplication and the worstbank with its employees.	ar	worstapplication worstbank employees	Negative	App Store	omran diab	11/5/22 18:27	فاشل				en	eg	1	0	0
App Store	Albilad	018a26b5-3c37-4d36-b279-f0a6800d6a6c	Slow, complicated, frequently crashes software that makes you think about changing your bank, unfortunately.	ar	slow complicate frequently crash software make think change bank unfortunately	Negative	App Store	zyeda.dr	7/8/23 2:41	بطيء				en	gb	1	1	1
App Store	Albilad	550d47dd-5c03-4e62-8659-cbd54178b19f	The program has not been working for several days and a message appears stating "Failed to connect to Banque Al Bilad servers."	ar	program work several days message appear state fail connect banque al bilad servers	Negative	App Store	mostafa18888	2/26/23 15:45	البرنامج لا يعمل				en	sa	0	1	0
App Store	Albilad	ed9e722f-9958-49a1-a5b3-d5c8cdabf3b3	The program is always malfunctioning and not valid. In conclusion, it is terrible.	ar	program always malfunction valid conclusion terrible	Negative	App Store	aziz alrooh	4/27/22 17:16	بنك البلاد				en	sa	1	1	0
App Store	Albilad	7ddec35b-afc3-4999-8cc2-7a50b37bb3ac	I wish the developers responsible for the development of the application would see other bank applications and learn, frankly, that this application is a failure.	ar	wish developers responsible development application would see bank applications learn frankly application failure	Negative	App Store	المشعبببى	4/26/22 23:07	تطبيق غبي				en	sa	1	0	0
App Store	Albilad	0f851ab3-3dfb-4f9e-a76d-9eb8962f5a80	A sterile application that makes you become fanatic.	ar	sterile application make become fanatic	Negative	App Store	Abduabouelkhir	9/19/23 6:57	تطبيق مستفز جدا				en	sa	1	0	0
App Store	Albilad	14ef2c0a-6722-4569-9435-db62326000dc	The worst application with updates that are released every few months, while other banks update their applications weekly. And even if the update comes after a long time, it does not bring anything new. Frequent service suspensions and interruptions to the point of being unbearable.	ar	bad application update release every months bank update applications weekly even update come long time bring anything new frequent service suspensions interruptions point unbearable	Negative	App Store	مقاطع لوجه المولى	9/11/23 20:26	Poor App				en	sa	1	1	0
App Store	Albilad	bca87dbb-f53c-4f6e-a7f4-3fc7cc416ca3	The interface and ease of access are not the same as other bank applications, Al Rajhi, Alinma, and SABB.	ar	interface ease access bank applications al rajhi alinma sabb	Negative	App Store	Mohammed11414	9/5/23 8:45	صعب الاستخدام				en	sa	0	0	0
App Store	Albilad	93dc10cc-8467-4ef0-bfbc-b725919db25b	The application is terrible to the highest degree .. 24 hours frozen.	ar	application terrible high degree hours freeze	Negative	App Store	12543678864	8/29/23 9:38	.				en	sa	1	0	1
App Store	Albilad	b26a7aa5-5a4a-4412-8e40-c0c8ad4583d4	First, when the bank first opened, it was excellent, but over time it became the worst bank possible to deal with. I had a very bad experience where a small amount was deducted from my Visa, and I complained several times to them. Finally, the employee told me that a mistake occurred and returned the amount. Attention and caution are necessary.	ar	first bank first open excellent time become bad bank possible deal bad experience small amount deduct visa complain several time finally employee tell mistake occur return amount attention caution necessary	Negative	App Store	غطريف	9/2/23 1:00	بنك البلاد للفشل عنوان				en	sa	1	0	0
App Store	Albilad	6fc41f10-952a-45b1-8d73-f678722607c5	To activate the quick login service, I have to delete the application, change the number, sign out, call the number, and in the end, it doesn't work.	ar	activate quick login service delete application change number sign call number end doesnt work	Negative	App Store	للنخ	8/31/23 11:42	سيء جداً				en	sa	0	1	0
App Store	Albilad	8af9f2b2-1332-43b5-bb64-7495d9173653	Please pay attention to the application and website because it is very slow compared to other banks.	ar	please pay attention application website slow compare bank	Negative	App Store	Omar Yousef12	8/19/23 8:37	التطبيق سي حدًا وبطي				en	sa	0	0	1
App Store	Albilad	d7ac16fb-0d3d-422e-9644-adaf80760fa8	From 10:30 in the morning until 3:30, the program did not work. How can we justify this? It is illogical! ð	ar	morning program work justify illogical	Negative	App Store	ffma96	8/28/23 12:30	لا يوجد التزام باوقات تحديث البرنامج				en	sa	1	1	0
App Store	Albilad	52a189d1-e3f6-4238-bdc7-c24f3465cb93	Frequent malfunctions and it freezes most of the time.	ar	frequent malfunction freeze time	Negative	App Store	menwweewrrr	8/28/23 8:28	يتعطل كثير				en	sa	1	1	1
App Store	Albilad	60d5bac2-961f-4552-8860-916b0942418b	The application is very bad, it hangs, rejects transfers, and has transfer fees unlike other banks	ar	application bad hang reject transfer transfer fee unlike bank	Negative	App Store	Abu Feisal 11	8/28/23 7:05	التطبيق سيئ جدا تعليق و رفض التحويل و رسوم تحويل عكس البنوك الاخرى				en	sa	1	1	1
App Store	Albilad	02955462-0dd9-4ad0-b82e-140f2f8eb9ce	The worst application on the face of the Earth.	ar	bad application face earth	Negative	App Store	Jannahrm	8/28/23 6:34	سيء				en	sa	1	0	0
App Store	Albilad	e5967f3c-1bd0-40d3-873d-80f9802c8b02	For years, we have been struggling with the application, and every time we say maybe it will improve, we are surprised to find that it is worse than before.	ar	years struggle application every time say maybe improve surprise find bad	Negative	App Store	z,:w	8/27/23 14:42	للاسف من سنوات ومازال التطبيق لايعمل بشكل جيد				en	sa	1	0	0
App Store	Albilad	1171ff0f-e44b-4cbd-aec2-5b7aa7fc010f	The bank is trash, the service is trash, they're thieves. The application is worse than trash, one of the worst things in the whole world is to open an account in this damn bank. May God curse them. I swear, it's one of the worst days of my life when I opened an account in this damn bank.	ar	bank trash service trash theyre thieve application bad trash one bad things whole world open account damn bank may god curse swear one bad days life open account damn bank	Negative	App Store	م.ع.ع.م	8/27/23 10:39	زباله				en	sa	1	0	0
App Store	Albilad	9dc775fe-539e-4510-b583-9ecd883c967f	Very slow and complicated, we hope that Al-Bilad Bank follows other applications in terms of speed, flexibility, and ease.	ar	slow complicate hope albilad bank follow applications term speed flexibility ease	Negative	App Store	hfhgh4123	8/27/23 9:02	تطبيق ممل				en	sa	1	0	1
App Store	Albilad	406c9c4b-086c-4044-85fb-45b7914995b5	The application suffers from constant freezing during salary disbursement.	ar	application suffer constant freeze salary disbursement	Negative	App Store	القسوري	8/27/23 3:05	نأمل التطوير				en	sa	0	1	1
App Store	Albilad	6ba2f59c-db75-448d-8e4b-16cf74289b76	Very bad application	ar	bad application	Negative	App Store	()4	8/26/23 21:41	التطبيق				en	sa	1	0	0
App Store	Albilad	ec990103-0480-44ff-9fb2-4860be297145	Compared to other banking programs, it is bad and below the standard, and I hope it gets improved as soon as possible due to the frequent poor user experience.	ar	compare bank program bad standard hope get improve soon possible due frequent poor user experience	Negative	App Store	sanram997	8/16/23 20:34	دون المستوى				en	sa	1	0	0
App Store	Albilad	50a32a55-b6fb-4c0d-92b0-5123ad42cffe	Unfortunately, the application is bad and does not meet the customer's requirements.	ar	unfortunately application bad meet customers requirements	Negative	App Store	ابوسعود2021	8/18/23 11:28	تطبيق سيء				en	sa	1	0	0
App Store	Albilad	584efb05-3eb9-4ec0-8b10-38e34f95172c	The worst banking application ever, you cannot make a single transaction in less than 10 minutes. It is terrible, terrible, terrible.	ar	bad bank application ever make single transaction less minutes terrible terrible terrible	Negative	App Store	m.humaidan	8/18/23 9:49	سيء للغايه				en	sa	1	0	0
App Store	Albilad	d04bd911-b03d-437a-9c60-938b6eb686df	The application has not been sharing the transfer receipt for more than two months when I try to share it via WhatsApp. Why?	ar	application share transfer receipt two months try share via whatsapp	Negative	App Store	om_azozy	6/19/23 15:21	مشاركة الإيصال				en	sa	0	1	0
App Store	Albilad	3a0eba5d-9b2d-457a-985e-ef5d947c7263	The worst application for conversion.	ar	bad application conversion	Negative	App Store	Fjfficuch	7/17/23 2:58	اسوء تطبيق				en	sa	1	0	0
App Store	Albilad	8a398487-0c46-4aae-a220-caba656d5091	The application does not open and it crashes, so I get logged out and I am unable to login.	ar	application open crash get log unable login	Negative	App Store	RAQO13	7/16/23 9:50	التطبيق لا يفتح				en	sa	0	1	0
App Store	Albilad	82f36ab8-7f4a-4bcf-9028-be77017efed4	The application is badly updated, it freezes and does not deliver the code, and it is outside the kingdom. I am unable to open my account.	ar	application badly update freeze deliver code outside kingdom unable open account	Negative	App Store	humud a	7/2/23 14:21	التطبيق سئ				en	sa	1	1	1
App Store	Albilad	e73abb75-09e7-466d-9cbf-4e7445b44908	When are you going to update the app? It is very bad, with a lot of bugs.	ar	go update app bad lot bug	Negative	App Store	Basr all	6/24/23 23:16	سيئ جدًا				en	sa	1	1	0
App Store	Albilad	b66d3ccb-94c2-4fd9-870a-217a77615ef3	I cannot carry the account statement.	ar	carry account statement	Negative	App Store	usuxhx	6/24/23 1:19	تطبيق فاشل				en	sa	0	1	0
App Store	Albilad	e71e6982-4392-41c4-941f-227493a77577	I have been with this country for more than 10 years. The application used to be one of the best, but unfortunately, there are many technical problems. It disconnects from the internet and kicks me out of the application frequently to the point that it bothers me. The problem has not seen any improvement.	ar	country years application use one best unfortunately many technical problems disconnect internet kick application frequently point bother problem see improvement	Negative	App Store	Energy427	6/23/23 13:10	التطبيق في انحدار				en	sa	1	1	0
App Store	Albilad	c1f06e3b-51b3-4d96-a3ee-344dbe77b496	Your application is very, very bad and in desperate need of complete development! Where are you and where are the rest of the banks you have, Al-Rajhi, Alinma, Al-Ahli, Arabi?	ar	application bad desperate need complete development rest bank alrajhi alinma alahli arabi	Negative	App Store	abudheeem	6/19/23 20:38	اسوء تطبيق				en	sa	1	0	0
App Store	Albilad	c01a0379-3d24-41cf-a210-8b2756e63d09	The developers of the Bank Al Bilad application, may God bless you, please consider removing the idea of hiding the balance and making it optional rather than mandatory. Additionally, it is not functioning correctly. Furthermore, the application is not like before, the user interface moves in a strange way, and the application icons require double or triple tapping in order to execute the command…	ar	developers bank al bilad application may god bless please consider remove idea hide balance make optional rather mandatory additionally function correctly furthermore application like user interface move strange way application icons require double triple tap order execute command expect may god bless	Negative	App Store	Saeedq95	5/29/23 12:26	التطبيق يحتاج تحديث				en	sa	1	1	1
App Store	Albilad	5f96bf89-f614-4c15-a714-a40eba06fb51	The application has had a problem in the past two months since October until now. Between every step in filling out the transfer data, for example, it logs out of the network and then reconnects so it goes back to the beginning of the process. Sometimes it logs in from the beginning. The average time for each transfer is about 15 minutes.	ar	application problem past two months since october every step fill transfer data example log network reconnects go back begin process sometimes log begin average time transfer minutes	Negative	App Store	Kgydanb	6/17/23 9:44	تقييم				en	sa	0	1	0
App Store	Albilad	4d3d161b-5c90-416d-af65-22bd783b86fa	Bad application that crashes and kicks you out of the app, and it's complicated. If you try to log in quickly, you can't do any operation. I wish they would learn from Al Rajhi Bank and the ease of their application and its use.	ar	bad application crash kick app complicate try log quickly cant operation wish would learn al rajhi bank ease application use	Negative	App Store	أبو فارس99	6/6/23 19:42	الرياض				en	sa	1	1	0
App Store	Albilad	1b6db2f7-b3d3-44c3-b634-d247629aa04f	The worst application, every time I try to open an account on it, it kicks me out and says your information is incorrect, when it is correct???	ar	bad application every time try open account kick say information incorrect correct	Negative	App Store	……………uwu	6/4/23 18:17	تطبيق				en	sa	1	1	0
App Store	Albilad	55521533-37f6-4e82-9585-bde3621ede60	I don't know why they intentionally ignore the app's issues. It hangs for everyone and displays "no internet connection," and you guys are magnifying pillows and sleeping. Fix it, for God's sake, you're a bank, what's the big deal and what are you doing?	ar	dont know intentionally ignore apps issue hang everyone display internet connection guy magnify pillow sleep fix gods sake youre bank whats big deal	Negative	App Store	تفاؤل77775	6/2/23 6:58	يعلق من سنه				en	sa	1	1	1
App Store	Albilad	397c35fc-ed19-4530-aace-79f7e958bdab	The application has been disabled since the last update and it is still not working.	ar	application disable since last update still work	Negative	App Store	fareed_997	6/1/23 15:08	التطبيق معطل من اخر تحديث وحتى الان لايعمل				en	sa	0	1	0
App Store	Albilad	b690f3b8-424a-4efb-9efa-7096d65932aa	The application is very bad.	ar	application bad	Negative	App Store	بدر بن احمد	5/31/23 3:01	التطبيق سيئ جدا جدا جدا				en	sa	1	0	0
App Store	Albilad	d7e60ff5-5ff9-4ebb-960d-2f04a966a336	The application has a problem for a few days. When I try to log in and after receiving the code and opening the application, a message appears that the login has expired.	ar	application problem days try log receive code open application message appear login expire	Negative	App Store	Abu Sultan 1985	5/25/23 7:52	خطاء بالتطبيق				en	sa	0	1	0
App Store	Albilad	354f1c90-aeea-4a5c-bbd5-9b08dd0f08d5	He always hesitates.	ar	always hesitate	Negative	App Store	ابوسعود عدنان	5/22/23 2:32	بطيء				en	sa	0	0	1
App Store	Albilad	5b6d9d47-88f0-4ce8-871a-fbc17c553cc8	The most application gives you an error message "The service is currently unavailable."	ar	application give error message service currently unavailable	Negative	App Store	al-nibras	5/24/23 15:57	سيء بشكل لا يوصف				en	sa	0	1	0
App Store	Albilad	8aa0288e-adae-4edf-8b4c-5093f5cfe3b4	I am trying to log in through the application, but I cannot. I am outside of the kingdom. Please improve the application.	ar	try log application outside kingdom please improve application	Negative	App Store	أكرم المغربي	5/24/23 11:03	التطبيق لا يعمل خارج المملكة				en	sa	0	1	0
App Store	Albilad	cbc94744-9854-4d12-b2df-e506c11277ac	The application is very bad. I wish the application could be updated and modified.	ar	application bad wish application could update modify	Negative	App Store	rahaf mt	5/22/23 5:43	سيئ جدا				en	sa	1	0	0
App Store	Albilad	236cc0c2-c683-45e2-8d28-1f63bf2e9487	The AlBilad Bank application needs improvements in order to reach competitive strength, unfortunately. There are several reasons for this. Firstly, the slow response time of the application leads to it being closed several times. Secondly, there is a lack of accuracy in displaying transaction history, specifically with credit cards. Additionally, accessing some basic information is difficult, and…	ar	albilad bank application need improvements order reach competitive strength unfortunately several reason firstly slow response time application lead close several time secondly lack accuracy display transaction history specifically credit card additionally access basic information difficult even adjust settings challenge hope bank focus improve quality application	Negative	App Store	alm3y	3/26/23 21:40	الجودة				en	sa	1	0	1
App Store	Albilad	743fafa4-ffa3-40b5-be78-57c52eadb7f1	The application suddenly crashed after I stared at it. Now you cannot make online purchases; every time you try to do so, it gets canceled. And you're unable to activate it again. It's so frustrating.	ar	application suddenly crash star make online purchase every time try get cancel youre unable activate frustrate	Negative	App Store	Honestly194848	5/19/23 0:56	تطبيق فاشل				en	sa	1	1	0
App Store	Albilad	e55e99ee-fa66-4afa-9838-8e581dda944b	The application is extremely bad, does not work, and it is unknown what the reason is.	ar	application extremely bad work unknown reason	Negative	App Store	abo_taher	5/15/23 12:17	التطبيق سئ للغاية و لايعمل و غير معلوم ما السبب				en	sa	1	1	0
App Store	Albilad	bba86390-8f24-4323-a576-b7d6da492c79	The application does not work most of the time and when I enter, I get logged out of the application or it freezes.	ar	application work time enter get log application freeze	Negative	App Store	ابو ريان 777	5/15/23 1:44	التطبيق لايعمل اكثر الاوقات				en	sa	0	1	1
App Store	Albilad	d9906262-08a7-4b12-89fa-51c43d2cb9e0	"The application is bad compared to the application of the rest of the banks."	ar	application bad compare application rest bank	Negative	App Store	أبوأنجد	5/10/23 8:31	يحتاج تطوير				en	sa	1	0	0
App Store	Albilad	8aa895e6-5c40-46a9-bc57-c3262376b56f	The application has not been working for more than a week.	ar	application work week	Negative	App Store	Ahmedharb73	5/8/23 6:28	التطبيق لايعمل من اكثر من اسبوع				en	sa	0	1	0
App Store	Albilad	60f3e121-0645-4275-b127-ff8fff098603	I have two devices, and every time I try to access my account from one device to another, it asks for device authentication. What is this, seriously? I'm tired of it, and I don't like it at all. I request a solution to this problem as soon as possible. Thank you.	ar	two devices every time try access account one device another ask device authentication seriously im tire dont like request solution problem soon possible thank	Negative	App Store	mohsinmakkee	4/9/23 0:29	اشكالية توثيق الجهاز				en	sa	1	0	0
App Store	Albilad	a14e6bbb-9e2e-4309-af13-7b9e33b2f427	Unfortunately, I swear by Allah, it is the worst bank I have ever dealt with. I did not expect them to close my account without any warning or clear reason. When I asked them, they said I have not used it for a month, which is a lie. I have used it. So, how can they steal my money that is in it? They have locked my account and say to go to the branch as if I have nothing else but them. I will tak…	ar	unfortunately swear allah bad bank ever deal expect close account without warn clear reason ask say use month lie use steal money lock account say go branch nothing else take money go al rajhi bank may allah bless best bank	Negative	App Store	ابو محمد:	4/4/23 11:23	نقد				en	sa	1	0	0
App Store	Albilad	f023ff4d-e32f-48a1-b674-b02bf523ba1a	We do not recommend downloading it or opening an account.	ar	recommend download open account	Negative	App Store	بداح تيلو	3/29/23 13:09	ازق بنك فالحياة				en	sa	0	1	0
App Store	Albilad	30abece3-5a27-431a-855c-0e5f7143e5e4	Your use of the application makes you feel like you are living in 2010, as if they are sending their employees for secondment to Al Rajhi.	ar	use application make feel like live send employees secondment al rajhi	Negative	App Store	Abdullah7787ii	3/27/23 13:48	سيئ				en	sa	1	0	0
App Store	Albilad	b4b10fdb-5309-44f0-a3e6-572e6de80e62	Worst application among all banking applications.	ar	bad application among bank applications	Negative	App Store	الـجـهـنـي	3/26/23 21:47	تجربتي بتطبيق بنك البلاد				en	sa	1	0	0
App Store	Albilad	a58d3123-93f3-46c6-a6cd-1bf6cd593b7a	The application has not been working for a while.	ar	application work	Negative	App Store	egyptian1990	3/26/23 18:35	كثرة مشاكل التطبيق				en	sa	0	1	0
App Store	Albilad	76dc6743-fde3-4e62-b139-f2bdc88ea516	For over two years, this application has been suffering from freezing, slowness, and a lack of organization due to a mess in the application and problems that occurred without any embarrassment!! It has been deleted and switched to another bank, thanks to God.	ar	two years application suffer freeze slowness lack organization due mess application problems occur without embarrassment delete switch another bank thank god	Negative	App Store	Alalalv34f	3/15/23 16:27	اسواء تطبيق تشوفه بحياتك				en	sa	1	1	1
App Store	Albilad	082efa8a-058e-4c65-980e-a839e71a498e	The application is not working. It gives an error message saying "Login has expired."	ar	application work give error message say login expire	Negative	App Store	سَــــاره	3/11/23 16:14	مافي كثر الحكى فايده				en	sa	0	1	0
App Store	Albilad	e0a11a08-cdd0-470d-af94-73f2a71cc12d	Unfortunately, the app does not support tablets.	ar	unfortunately app support tablets	Negative	App Store	bobam26	3/9/23 23:58	الأجهزة اللوحية				en	sa	1	1	0
App Store	Albilad	008c50b3-437d-414b-914d-7ff6e45a7acb	The application is not good.	ar	application good	Negative	App Store	معلق٥٤٥	3/9/23 15:44	تقيم				en	sa	0	0	0
App Store	Albilad	1423787a-91d7-4b14-827d-3f53c5174081	I cannot update my data through the application as an error message appears every time. Please solve the problem and update the application.	ar	update data application error message appear every time please solve problem update application	Negative	App Store	Odd5yy	3/9/23 7:11	يوجد مشكلة				en	sa	0	1	0
App Store	Albilad	dfd95117-66ea-4ab7-886b-dea99ff55ef5	By God, one of the worst banks in the Kingdom with poor services. I do not recommend anyone to use it or open an account with them. If you want to update your information, you have to go to the branch, and their branches are very few and not available on every street like the other banks. Moreover, before anything else, all banks update automatically or through their application, except for Albil…	ar	god one bad bank kingdom poor service recommend anyone use open account want update information go branch branch available every street like bank moreover anything else bank update automatically application except albilad bank troublesome go branch rarely find professional employees work conscientiously	Negative	App Store	Waleed 6558	3/7/23 15:12	المدينة المنورة				en	sa	1	1	0
App Store	Albilad	be2a456b-b14f-4d28-bd2d-a25b83f5be3a	The application is not working, it is unable to connect to the servers of the country. Please solve the problem.	ar	application work unable connect servers country please solve problem	Negative	App Store	اميره الظلام	2/26/23 19:41	مشكلة				en	sa	0	1	0
App Store	Albilad	5b292361-18d7-4766-b171-9cc82bb103e8	Please solve the problem quickly within ten days as the program is not functioning and you have no solution.	ar	please solve problem quickly within ten days program function solution	Negative	App Store	F_albattal	3/4/23 11:35	عطل في البرنامج				en	sa	0	1	0
App Store	Albilad	4006427b-89a1-47c1-9642-15268f4b3f51	Many complicated steps to open a new account and in the end it gives you a notification "this service is not available".	ar	many complicate step open new account end give notification service available	Negative	App Store	A seven7	3/2/23 5:59	اسوء تطبيق لبنك قد تعاملت معه				en	sa	1	1	0
App Store	Albilad	44aa1acf-9853-44fd-878b-da406f82ed62	March 1, 2013 Today is Wednesday. The application has not been working or responding for three days. The problem should be resolved as soon as possible.	ar	march today wednesday application work respond three days problem resolve soon possible	Negative	App Store	sshemo	3/1/23 20:10	خبر مهم				en	sa	0	1	0
App Store	Albilad	113388c4-b928-4284-a350-19da5cd75e51	The bank is heading towards its demise to become one of the best banks in the kingdom, even though I have been a customer with them since 2008.	ar	bank head towards demise become one best bank kingdom even though customer since	Negative	App Store	Mohammed M. B	3/1/23 15:27	صار له اسبوع متوقف عن العمل				en	sa	1	0	0
App Store	Albilad	ca0be995-3337-4d3c-8e08-e82397909728	The application doesn't work most of the time and is not useful at all. I have deleted it 5 times and reinstalled it, but it still gives an error message upon login, even though the data is correct and has been tested in front of a branch employee. It is useless and serves no purpose as the website is the only functioning option.	ar	application doesnt work time useful delete time reinstall still give error message upon login even though data correct test front branch employee useless serve purpose website function option	Negative	App Store	dxzdsaertygvvffhhhu	2/28/23 6:24	سيئ جدا جدا 👎🏻👎🏻👎🏻👎🏻👎🏻				en	sa	0	1	0
App Store	Albilad	ca2ae581-2182-44e5-9d23-97746c3cfc86	Very bad, slow and does not show all the details of the installment discount. It suddenly erases login information without any reason or prior warning and refuses to login with correct information. Very, very bad.	ar	bad slow show detail installment discount suddenly erase login information without reason prior warn refuse login correct information bad	Negative	App Store	اناة٢٣	2/28/23 0:46	تت				en	sa	1	1	1
App Store	Albilad	0a1fe35d-106d-456f-b340-8ab5b18b1bc5	The application has a problem, for a few days now, it displays a message saying "Unable to connect."	ar	application problem days display message say unable connect	Negative	App Store	ام الحلا نوف	2/26/23 19:49	صلحوا التطبيق				en	sa	0	1	0
App Store	Albilad	d2f243b7-ebf4-49c1-9293-7417f7738c3e	The application has been nonfunctional for four days and the bank is asleep, not doing anything until now. There is no declaration or any respect for the customer. It is the cheapest bank I have ever seen.	ar	application nonfunctional four days bank asleep anything declaration respect customer cheap bank ever see	Negative	App Store	Aboode07	2/26/23 19:38	بنك رخيييص وسيئ				en	sa	1	1	1
App Store	Albilad	a0802734-01f8-4d96-b737-51b3099999ce	The application has not been working for 3 days, what are the reasons???	ar	application work days reason	Negative	App Store	omarxxxxx	2/26/23 17:43	ع				en	sa	0	1	0
App Store	Albilad	7b12140b-4823-42bd-90ab-a30dbb250284	Worst bank program in the kingdom, it has many negative comments, and the technical support is inactive. ðð»	ar	bad bank program kingdom many negative comment technical support inactive	Negative	App Store	Nayef A	2/25/23 19:48	البرنامج معلق من ٤ ايام				en	sa	1	0	0
App Store	Albilad	8d0e85ed-a285-4642-a9f1-55f1ed166201	In the new update, it always gives an error when opening the application.	ar	new update always give error open application	Negative	App Store	سامح ابوندي	2/21/23 11:03	مشكلة				en	sa	0	1	0
App Store	Albilad	a683b002-fc90-4e52-a239-1c074533552e	The application has been malfunctioning for a few days.	ar	application malfunction days	Negative	App Store	فارغ	2/25/23 13:31	التطبيق مايشتغل				en	sa	1	1	0
App Store	Albilad	c35a0e9d-fd47-4dee-a20a-71874fde41b2	Are recharge cards only 10 riyals? Greetings, so I have to transfer the amount to Al-Rajhi and recharge from there in just three steps. Try to solve this issue because it's disgusting.	ar	recharge card riyals greetings transfer amount alrajhi recharge three step try solve issue disgust	Negative	App Store	سامي الحواش	2/24/23 16:04	بطايق الشحن				en	sa	0	1	0
App Store	Albilad	e393df33-7c4f-47a6-8987-7e0c459c49cd	The application is not working due to a lack of connection to the server.	ar	application work due lack connection server	Negative	App Store	Yasser443	2/24/23 6:16	التطبيق لا يعمل				en	sa	0	1	0
App Store	Albilad	7833ee49-3c61-4190-a5d7-7815ccfd6d6d	Their application is weak and never opens for me due to a technical malfunction. How can a bank application not work for more than 24 hours! This is a disgrace to you.	ar	application weak never open due technical malfunction bank application work hours disgrace	Negative	App Store	الـمًسـلم الـحًر	2/23/23 21:42	بنك البلاد				en	sa	1	1	0
App Store	Albilad	61f35a51-e529-47ca-bbb6-ace6713f1944	The application does not work for two days, and it is not possible to access the servers in the country. Please find a solution for us.	ar	application work two days possible access servers country please find solution us	Negative	App Store	crash-qh	2/23/23 12:13	التطبيق ما يشتغل				en	sa	0	1	0
App Store	Albilad	04fc117f-3671-4e08-acbc-20f68b40d25d	Unfortunately, it is the worstapplication.	ar	unfortunately worstapplication	Negative	App Store	Abo ward 1987	2/23/23 8:29	سيئ جدا				en	sa	1	0	0
App Store	Albilad	db5a365c-c7da-453a-8c1a-09c18ea37906	Problem: When trying to execute any operation, a message appears stating that there is no network. However, when canceling the operation, it is still executed. Please provide a solution.	ar	problem try execute operation message appear state network however cancel operation still execute please provide solution	Negative	App Store	ابو محمد سامي السلمي	2/23/23 5:39	رسالة بعدم وجود شبكة				en	sa	0	1	0
App Store	Albilad	49ed6281-48a6-40a9-ae45-e5f8abd5c4d4	I'm surprised that a big bank like Al-Bilad has such primitive issues with their application. Unfortunately, the bank's technology department is unprofessional and does not keep up with the advancements of other banks.	ar	im surprise big bank like albilad primitive issue application unfortunately bank technology department unprofessional keep advancements bank	Negative	App Store	Nashmi Alharbi	2/22/23 7:57	مشاكل تقنية وصعوبة بالعمليات				en	sa	1	0	0
App Store	Albilad	f687cd8d-7665-4dc3-bfed-72fb89868378	The latest update is bad. We hope that the management of Al Bilad Bank can improve the application. Recently, the application keeps crashing and disconnecting for no reason, and it happens more than 3 times. This occurs even with a good internet connection. We also suggest improving the user interface for ease of use, making transfers and adding beneficiaries faster and more secure, and offering …	ar	late update bad hope management al bilad bank improve application recently application keep crash disconnect reason happen time occur even good internet connection also suggest improve user interface ease use make transfer add beneficiaries fast secure offer reward customers like bank benefit ideas al rajhi saudi investment alahli bank applications incorporate feature application	Negative	App Store	alrhal1439	2/22/23 7:00	التطبيق لا يعمل حتى بعد التحديث				en	sa	1	1	1
App Store	Albilad	3794c0c6-99ec-4da4-b303-420c5bf13a77	The application is very tired, it always crashes and there is always a problem. You have to delete the application and re-authenticate the device in order to enter. Learn from Al Rajhi.	ar	application tire always crash always problem delete application reauthenticate device order enter learn al rajhi	Negative	App Store	أحس انتي ما احس	2/21/23 23:05	تطبيق زقت				en	sa	0	1	0
App Store	Albilad	30d71343-e7d1-4047-b07a-c387ee6f1aad	Transfers are limited to three times a day?! Suddenly, the application crashes during peak hours without prior warning, claiming it is due to an update?! Where did the update go on Friday and it remains dysfunctional for the whole day?	ar	transfer limit three time day suddenly application crash peak hours without prior warn claim due update update go friday remain dysfunctional whole day	Negative	App Store	Salee_7	2/21/23 22:04	التطبيق من سيئ الى اسوء بعد التحديث				en	sa	1	1	0
App Store	Albilad	56a47d86-8697-474c-9ad2-c843bb1839eb	Unfortunately, the application lacks many features and services available in other banking applications. Additionally, it needs adjustments in terms of interface and usability as it is currently difficult and complicated to use. Moreover, the application is not working at the moment. ðð¼	ar	unfortunately application lack many feature service available bank applications additionally need adjustments term interface usability currently difficult complicate use moreover application work moment	Negative	App Store	Waleedhz	2/21/23 16:36	التطبيق يحتاج تحديث وتطوير				en	sa	1	1	0
App Store	Albilad	a6aa9e32-3af5-4342-89db-6ca77e6f9626	I'm facing a problem with password recovery, as I enter the data correctly and verify it, but it gives me an error. Please look into the matter. Thank you very much.	ar	im face problem password recovery enter data correctly verify give error please look matter thank much	Negative	App Store	هنوص	1/30/23 12:07	مشكله تقنية				en	sa	0	1	0
App Store	Albilad	f1ad949e-b4a3-480c-83f7-5f6b8677fe57	I have been trying to register on the application for 16 days, but I am unable to complete the steps. It keeps telling me that the service is not available. I have submitted multiple requests, but I haven't received any helpful response. Honestly, I wish I hadn't dealt with this bank.	ar	try register application days unable complete step keep tell service available submit multiple request havent receive helpful response honestly wish hadnt deal bank	Negative	App Store	A7m3d TITO	2/9/23 11:33	تسجيل دخول				en	sa	0	1	0
App Store	Albilad	1935bdf0-e7de-458a-8e1c-18717284b0d8	The worst bank you can deal with.	ar	bad bank deal	Negative	App Store	Manal🖤	2/7/23 13:34	اسوء بنك				en	sa	1	0	0
App Store	Albilad	8ad62ac7-bf5d-409d-a9cc-c38d564b0447	The application is bad, it frequently crashes and is slow.	ar	application bad frequently crash slow	Negative	App Store	fadi 91	1/26/23 7:23	التطبيق سئ				en	sa	1	1	1
App Store	Albilad	e899e7ba-82ed-440e-9734-5ca882843755	The application is slow and needs a thorough review. It does not send text messages with the new update and claims that there is an unstable internet connection on the interface. It is strange to have an application in this manner for a prestigious bank.	ar	application slow need thorough review send text message new update claim unstable internet connection interface strange application manner prestigious bank	Negative	App Store	مرشد طلابي قديم	1/10/23 1:18	تطبيق سيء				en	sa	1	0	1
App Store	Albilad	856707bb-6182-430c-93da-87e57d32631a	I am outside Saudi Arabia and I am unable to log into the account. The application is not working.	ar	outside saudi arabia unable log account application work	Negative	App Store	Abuauuf	1/21/23 16:02	سيئ				en	sa	0	1	0
App Store	Albilad	8ef38332-ebed-4ee4-8114-cff855d4af6a	A comment that is impractical and disconnected, each update worse than the previous one.	ar	comment impractical disconnect update bad previous one	Negative	App Store	فهد ـ11	1/18/23 20:03	السعودية				en	sa	1	0	0
App Store	Albilad	df2f35db-c4a2-42c2-b530-7b63b31b228b	Honestly, it is impossible to describe the extent of the application's poor performance. The interfaces do not match modern Apple devices, and banking services are not available in the application. There is a significant delay in retrieving information.	ar	honestly impossible describe extent applications poor performance interfaces match modern apple devices bank service available application significant delay retrieve information	Negative	App Store	Badr Mishal	1/10/23 5:28	تطبيق سيء				en	sa	1	0	1
App Store	Albilad	2e73c48e-fc19-4328-8f02-0ef669b310f2	This application represents the bank in a very bad way.	ar	application represent bank bad way	Negative	App Store	alsubhikhalid	1/7/23 23:40	تطبيق يمثل البنك بشكلٍ سيئ جدا				en	sa	1	0	0
App Store	Albilad	47e6117a-6e23-40ec-b1a6-bbe7548e1d0b	The worst program, the worst bank in Saudi Arabia.	ar	bad program bad bank saudi arabia	Negative	App Store	d7oom23	1/3/23 12:33	.				en	sa	1	0	0
App Store	Albilad	a509494d-69f2-493e-856b-d2bd7059db97	One of the worst banking applications in Saudi Arabia! The application should be developed and be on par with other applications such as Al Rajhi Bank's application, which saves you the visit to the branch in addition to its ease of use and smooth login and logout process unlike this application, Al Bilad Bank's application, which is constantly hanging for 24 hours and kicks you out of the applic…	ar	one bad bank applications saudi arabia application develop par applications al rajhi bank application save visit branch addition ease use smooth login logout process unlike application al bilad bank application constantly hang hours kick application etc	Negative	App Store	اتق الله تجد المخرج من كل ضيق	12/31/22 10:05	سيء جداً				en	sa	1	1	1
App Store	Albilad	9cc3a6c7-9ebc-4f70-98dc-0abf791f0cad	The worst banking application I have dealt with.	ar	bad bank application deal	Negative	App Store	aan785	12/26/22 20:28	تطبيق فاشل				en	sa	1	0	0
App Store	Albilad	39f41f60-68a0-4c17-945f-f8df1b38602d	The fast login service and face recognition feature are not working, it says there is an error. Inside the application, it says in the year 90, check where the other apps are. Pray.	ar	fast login service face recognition feature work say error inside application say year check apps pray	Negative	App Store	توفيق ٧١٤٨	12/16/22 12:02	اسواء تطبيق				en	sa	0	1	0
App Store	Albilad	6a3e3172-c682-4270-9176-62669a49587c	I've been trying for two days to open the application, but it keeps refusing to stay running.	ar	ive try two days open application keep refuse stay run	Negative	App Store	عائشة آل عواض	11/28/22 8:49	التطبيق سيء				en	sa	0	1	0
App Store	Albilad	7a12e936-cf9a-4aa0-bb31-fed49a6aecba	the worstbank with poor electronic services that is not comparable to other banks.	ar	worstbank poor electronic service comparable bank	Negative	App Store	آسر 2059	11/8/22 10:08	السعودية				en	sa	1	0	0
App Store	Albilad	5fc8a142-815b-4b4f-8594-b62e164bd9a4	Why is the explanation in English? Are your customers foreigners?	ar	explanation english customers foreigners	Negative	App Store	mon7875467	11/2/22 11:16	?				en	sa	1	1	0
App Store	Albilad	1f7ba595-bb91-4efd-9d51-634ed35ccd1c	Advice from a brother who lived with me in Bank AlBilad for 14 years, I swear to you by Allah it is the worst bank I have ever dealt with. Their services are like garbage, they work like thieves on your account. Even if the mistake is on them, they will go and withdraw from your account and you won't even know, even if I am not attached to a loan, I have never sat in it, but as soon as I finish, …	ar	advice brother live bank albilad years swear allah bad bank ever deal service like garbage work like thieve account even mistake go withdraw account wont even know even attach loan never sit soon finish destroy atms advice brothers stay away bank	Negative	App Store	بن سليتان قرقور جعبور المتكي	10/23/22 18:32	بنك البلاد				en	sa	1	1	0
App Store	Albilad	19124083-7d47-42a3-91a7-9bf04bffebc3	Bad evaluation, unfortunately, and I don't know when it will improve.	ar	bad evaluation unfortunately dont know improve	Negative	App Store	mwzan	8/25/22 16:16	السعودية				en	sa	1	0	0
App Store	Albilad	ef22ac9d-28c4-44c6-a567-43d921bbb54c	It doesn't work.	ar	doesnt work	Negative	App Store	BA9960	10/5/22 17:12	لا يعميل				en	sa	0	1	0
App Store	Albilad	893a7ed9-bbec-486c-b4fe-8ee8853a2c59	It can betray you at any time, sometimes it gives you a message saying your device is not trusted!! You must reissue your card from the bank to authenticate your device!! We hope you will urgently solve this problem.	ar	betray time sometimes give message say device trust must reissue card bank authenticate device hope urgently solve problem	Negative	App Store	ابوخالد٤١	10/5/22 14:10	تطبيق سيء				en	sa	1	1	0
App Store	Albilad	43917a90-8327-49b4-942a-01fa3f03c0c7	Very very bad.	ar	bad	Negative	App Store	hdhdhhdsjjd	10/4/22 16:14	أسوء تطبيق بنكي				en	sa	1	0	0
App Store	Albilad	92cd7679-7c7a-4992-978d-ed753bd4836c	I wish her phone was turned off or optional, it's really annoying when someone wants to get things done quickly without any additional complications.	ar	wish phone turn optional really annoy someone want get things do quickly without additional complications	Negative	App Store	majed 2009	10/3/22 12:54	خاصية تأمين او توثيق الجهاز مزعجة				en	sa	1	1	0
App Store	Albilad	6e7951a7-c886-4e37-9042-f3af1bb5843c	Why is the device being documented? I am careful not to download social media applications like TikTok and others. Now, the Bank AlBilad application is trying to track and know everything related to my device type, search engine, and other information through this feature. The application will be deleted immediately, both from my device and online.	ar	device document careful download social media applications like tiktok others bank albilad application try track know everything relate device type search engine information feature application delete immediately device online	Negative	App Store	عودة التطبيق السابق	9/28/22 18:58	توثيق = تتبع				en	sa	0	1	0
App Store	Albilad	7b6b1097-694c-48df-bb9b-c622c3b7987e	A bad application always hangs, especially when I try to add a new beneficiary. It hangs every time.	ar	bad application always hang especially try add new beneficiary hang every time	Negative	App Store	Nma&	9/25/22 14:33	تطبيق سيء				en	sa	1	1	1
App Store	Albilad	906e5785-d26a-4c4c-9ae0-ef1e36e888c3	The application, in general, freezes frequently, making it necessary to imagine in order to complete its work. It crashes five times and the same problem occurs again. Additionally, there is difficulty in using it. Please provide me with the Rajhi Bank application.	ar	application general freeze frequently make necessary imagine order complete work crash five time problem occur additionally difficulty use please provide rajhi bank application	Negative	App Store	gagsgsc	9/24/22 2:22	تطبيق يعلق وصعب في الاستخدام				en	sa	1	1	1
App Store	Albilad	16dbdce0-bce4-4d2a-8102-68ffc24d752c	The application does not allow me to access my account at all, even after contacting customer service. The issue has not been resolved.	ar	application allow access account even contact customer service issue resolve	Negative	App Store	jur do	8/4/22 22:58	سيء جدًا				en	sa	0	1	0
App Store	Albilad	6964a331-a675-4408-9127-16a596082c90	The application used to be good, but recently it has become difficult to access it on mobile. So, I am forced to only access it through the laptop or the website on the internet. However, the application always gives me an incorrect number?!	ar	application use good recently become difficult access mobile force access laptop website internet however application always give incorrect number	Negative	App Store	abu1399	7/1/22 17:24	رأيي في التطبيق				en	sa	1	1	0
App Store	Albilad	b89692b9-aec3-48b6-99e5-d0d0d021599a	The application does not accept login and says that the username or password is incorrect, even though I am already logging in through the browser, but the application does not work.	ar	application accept login say username password incorrect even though already log browser application work	Negative	App Store	yasmine.A	7/1/22 13:45	👎🏻				en	sa	0	1	0
App Store	Albilad	54692641-4f68-4393-8894-1f4725215e29	The worst banking application I have seen.	ar	bad bank application see	Negative	App Store	انا يزن علي الشريف	6/29/22 7:54	اسوء تطبيق				en	sa	1	0	0
App Store	Albilad	9d482921-d006-4d6b-9bf1-527899b7aac1	Bank Mat'ab is facing many technical issues in all of its transactions.	ar	bank matab face many technical issue transactions	Negative	App Store	ابومحمد A	6/23/22 6:22	أسوأ بنك				en	sa	0	1	0
App Store	Albilad	5486ef2a-7d67-4eb5-ab53-a7726b83c1e7	Very bad application and it does not keep up with the developments of other banking applications.	ar	bad application keep developments bank applications	Negative	App Store	abosaud2020	6/19/22 16:16	تطبيق سيء جداً				en	sa	1	0	0
App Store	Albilad	708ce7da-5e31-4813-bb11-a919f5090a97	The application does not open with you, and if you call the customer service, they activate your account and say that the service is not available. And if you try to speak with an employee, they hang up on you, and when you call again, they answer and tell you to go back to the application. Bad service.	ar	application open call customer service activate account say service available try speak employee hang call answer tell go back application bad service	Negative	App Store	Abufahad1979	6/6/22 0:58	خدمة سيئة				en	sa	1	1	1
App Store	Albilad	d19ca817-7f83-488a-8fea-ec9624a9ffa2	Always encountering problems and never benefiting from whatever I need. It is clear that the development team needs a complete overhaul. It is completely unacceptable for a large financial institution in a big market to have products at this poor level.	ar	always encounter problems never benefit whatever need clear development team need complete overhaul completely unacceptable large financial institution big market products poor level	Negative	App Store	أبو عمر ١٣	5/18/22 10:19	مستوى سئ يفوق التصور				en	sa	1	0	0
App Store	Albilad	4b43b943-18d4-46c4-9bf0-2fe888834e05	The truth is that it is a bad and very complicated application. I wish to benefit from the experience of Al Rajhi Bank's application as it combines ease and security.	ar	truth bad complicate application wish benefit experience al rajhi bank application combine ease security	Negative	App Store	a.m.r..	5/8/22 11:43	تطبيق معقد				en	sa	1	0	0
App Store	Albilad	16669332-be5b-454d-bb0a-fbd7f2f6e691	I have an Al Rajhi app, I swear by God, it's different. What is this? It freezes and crashes very badly.	ar	al rajhi app swear god different freeze crash badly	Negative	App Store	Sameer2915900	5/5/22 17:31	تطبيق سيئ جداً				en	sa	1	1	1
App Store	Albilad	90115426-cb71-4f1a-ae70-f58d19c7439a	It's bad, especially after the update.. The sunrise doesn't appear.. And it exits from the Quran when exiting the application, unlike the previous version.	ar	bad especially update sunrise doesnt appear exit quran exit application unlike previous version	Negative	App Store	abooohala	4/7/22 10:29	سي التطبيق				en	sa	1	1	0
App Store	Albilad	00bc37e2-20ca-4777-b21b-e4db3c936531	The worst program	ar	bad program	Negative	App Store	aboabdu	3/3/22 14:22	لايعمل				en	sa	1	0	0
App Store	Albilad	41ad1ea1-ee91-4d2d-aaaa-c156bf184f40	Your application is worse than failure itself. Try to become one-quarter of Al Rajhi Bank's application or half of Al Ahli Bank's application. Your application is very poor and reflects your poor level. And there is no development at all with you. For me, I regretted taking a real estate loan and a personal loan from you.	ar	application bad failure try become onequarter al rajhi bank application half al ahli bank application application poor reflect poor level development regret take real estate loan personal loan	Negative	App Store	حمد عبدالكريم	3/3/22 1:04	فاسل				en	sa	1	1	0
App Store	Albilad	c9eff0e4-9789-421b-92d5-35ae5befa435	Always out of service, I hope you can get assistance from the technical support staff at Al-Rajhi Bank.	ar	always service hope get assistance technical support staff alrajhi bank	Negative	App Store	ابوالمها $$$	2/26/22 23:11	تطبيق البلاد				en	sa	1	0	0
App Store	Albilad	50b0c350-6850-43ec-ab4b-71d5c7df7fae	"I am trying to log into my account, but the application is very unsuccessful."	ar	try log account application unsuccessful	Negative	App Store	Aa75432111	2/25/22 15:02	لو فيه اقل من نجمة كان عطيتهم				en	sa	1	1	0
App Store	Albilad	a9a29a43-27bd-4a08-ba02-ddf6187b457e	The message doesn't get through, and if you rely on this bank, it will always cause you problems.	ar	message doesnt get rely bank always cause problems	Negative	App Store	Kheeeeeee	1/31/22 20:18	تطبيق تعبان				en	sa	0	1	0
App Store	Albilad	0be3784d-3a79-45ce-819e-b6d875556a87	The constant updates are annoying.	ar	constant update annoy	Negative	App Store	ابو عبدالاله الاول	1/26/22 14:29	ازعاج التحديث				en	sa	1	0	0
App Store	Albilad	4235f66e-14ac-4c89-9bf4-b7bef8565a7a	I have been registering for a week, he enters with me once and ten times he says error.	ar	register week enter ten time say error	Negative	App Store	moh99med	1/16/22 12:38	اسوء تطبيق بنك مر الي				en	sa	0	1	0
App Store	Albilad	097534b8-3cab-47cc-992b-78e3032e6b3c	It doesn't work with the new update.	ar	doesnt work new update	Negative	App Store	لا أود التخريب لكن هم اجبروني	1/7/22 18:03	..				en	sa	0	1	0
App Store	Albilad	4c862027-8ceb-4098-90dc-f71bbdea864d	The worst bank with numerous financial problems. Amounts deducted without transfer and government bills remain unpaid. To reclaim your rights, you must submit a request and wait for 72 hours. This bank is a major failure, unlike Al Rajhi Bank and other banks that provide fast service. ððððððððð	ar	bad bank numerous financial problems amount deduct without transfer government bill remain unpaid reclaim right must submit request wait hours bank major failure unlike al rajhi bank bank provide fast service	Negative	App Store	المفك الفاخر	10/24/22 18:04	فاشل				en	sa	1	1	0
App Store	Albilad	fa330065-5e7b-4160-8205-552565f50a9a	This bank is the worst bank ever in its application and its poor ATMs. As for its employees, they are respectful, but they have no control over the matter.	ar	bank bad bank ever application poor atms employees respectful control matter	Negative	App Store	rezq82	8/24/23 17:26	الرياض				en	us	1	0	0
App Store	Albilad	fc3a8dca-7d30-4aaf-82cc-1cc66f2e9d2f	The program keeps freezing constantly, you cannot delete old accounts and old cards.	ar	program keep freeze constantly delete old account old card	Negative	App Store	hosin m	7/6/23 14:11	التحديث هذا يحتاج تحديث				en	us	0	1	1
App Store	Albilad	c76a242e-8cd4-4858-96e4-56d2e1f61d1b	The worst application in the history of humanity, a handicapped application that raises blood pressure, I hope it is deleted from the Apple Store. The person who created it from Al Rajhi Bank should have learned from it.	ar	bad application history humanity handicap application raise blood pressure hope delete apple store person create al rajhi bank learn	Negative	App Store	نفروبكم	6/27/23 19:49	أسوأ تطبيق على مر تاريخ البشريه				en	us	1	0	0
App Store	Albilad	b9e0ed65-593f-4a1c-bcdc-2a837584b159	Very bad application, slow, full of errors and problems, lacks innovative solutions, very gloomy interface. I advise the administration to reconsider this bad application and benefit from competitive bank applications like Al-Rajhi.	ar	bad application slow full errors problems lack innovative solutions gloomy interface advise administration reconsider bad application benefit competitive bank applications like alrajhi	Negative	App Store	EidSky	6/24/23 22:26	أسوأ تطبيق بنكي				en	us	1	1	1
App Store	Albilad	e398f6af-df4b-434e-b2b4-7be090d15891	The application is slow and largely incompatible with modern devices, its dimensions disappear. The user interface (UI/UX) is very poor and outdated, and does not align with modern designs used by banks like Al Rajhi and Alinma. The banking services are also very poor, and hopefully some banks will take over it.	ar	application slow largely incompatible modern devices dimension disappear user interface uiux poor outdated align modern design use bank like al rajhi alinma bank service also poor hopefully bank take	Negative	App Store	معاوية بن يزيد ال عمر	5/24/23 13:05	تطبيق سيئ جداً جداً				en	us	1	0	1
App Store	Albilad	89d77e95-bcd2-48e7-8ffd-c1e3f4cbfaf7	I am amazed by this bank's ugly application and low rating in all app stores. Can you imagine that the average rating of their application is 300 compared to other banks' applications that exceed an average rating of 8000, and another Saudi bank that has exceeded 2000000? It seems like they don't listen, see, or value their customers. It appears that they are insisting on this approach, unfortuna…	ar	amaze bank ugly application low rat app store imagine average rat application compare bank applications exceed average rat another saudi bank exceed seem like dont listen see value customers appear insist approach unfortunately regret say simple store applications surpass applications bank especially one please show little modesty courtesy	Negative	App Store	Mu ia	5/11/23 2:59	تطبيق بنك البلاد				en	us	1	0	0
App Store	Albilad	875aa88b-b396-4469-8fe2-2ed4140dd5f4	The application is very bad, the backend and frontend are the worst I have seen. High school and middle school students can produce much better designs and interfaces than what we are dealing with. It's frustrating that it keeps crashing, and the transfers require a million calls and confirmations. Once I enter the program, it tells me a million times that it's sorry for the connection to the ser…	ar	application bad backend frontend bad see high school middle school students produce much good design interfaces deal frustrate keep crash transfer require million call confirmations enter program tell million time sorry connection servers come pay company improve crappy application	Negative	App Store	GhaloDaw	3/26/23 21:50	اسوء تطبيق				en	us	1	1	1
App Store	Albilad	4808d279-4984-4178-9bc3-45f3188f90ce	The application is always frozen.	ar	application always freeze	Negative	App Store	الاعتراضات	2/25/23 2:02	تعليق				en	us	1	0	1
App Store	Albilad	4be1c62b-b766-4bcf-a08b-c735e9f1d73e	The text means: "An error message appears stating that it is not possible to connect to the servers."	ar	text mean error message appear state possible connect servers	Negative	App Store	Moooookly	2/24/23 18:58	مشكلة بالتطبيق				en	us	0	1	0
App Store	Albilad	2590d809-3c4b-4ce6-bee4-39b9af1f15ef	The application does not appear properly on the iPhone 14 Pro screen. For example, the exit button is not responsive!	ar	application appear properly iphone pro screen example exit button responsive	Negative	App Store	Salah Althubaiti	10/29/22 8:07	التطبيق ما يظهر بالشكل المطلوب على شاشة ايفون ١٤ برو				en	us	0	1	0
App Store	Albilad	92e50dc2-d51f-42a6-9894-bb9d7b1e86ec	The app is not working since yesterday by giving error âFailed to connect to AlBilad server, please try again laterâ. Kindly check this issue. Thanks	en	app work since yesterday give error fail connect albilad server please try late kindly check issue thank	Negative	App Store	sagk0012	2/22/23 9:31	Not working Failed to connect				en	sa	0	1	0
App Store	Albilad	faded946-07b2-4bfd-96d6-d5a33290293a	It is one of the worst banking apps and you can say the worst. You can reach moon or Mars easily faster than making face id or activate anything in the app. Itâs really complicated. In the past, was very excellent but in the last two years becomes junk	en	one bad bank apps say bad reach moon mar easily fast make face id activate anything app really complicate past excellent last two years become junk	Negative	App Store	jaguar45433	1/23/23 5:50	The worst app in face id and any activations				en	sa	1	1	0
App Store	Albilad	ead974c7-09bb-47d2-a2fb-f6a296d52e87	Trying to activate face ID and quick access. The procedure told by call center people never works. It ends up with call transferred to them at the end and they do nothing.	en	try activate face id quick access procedure tell call center people never work end call transfer end nothing	Negative	App Store	Muhammad Nasrullah	2/25/22 18:55	Face ID & Quick Access ~ worst to activate				en	sa	0	1	0
App Store	Albilad	7c6a3137-3761-40fe-bac1-f9b405a2661b	The app is not working since four days and giving error "Failed to connect to AlBilad server please try again later" Kindly solve this issue	en	app work since four days give error fail connect albilad server please try late kindly solve issue	Negative	App Store	Farhnzz	2/26/23 13:15	App is not working				en	sa	0	1	0
App Store	Albilad	ae0eea50-4c83-45ba-8a86-3d9c6d7202c3	Always when I start paying bills after the process done the freeze and crash ð¥	en	always start pay bill process do freeze crash	Negative	App Store	Adel0L	12/9/22 15:35	App crash				en	sa	0	1	1
App Store	Albilad	7b771ee1-ad28-4694-9d5d-54be2d77220c	The app is far behind others local banks apps which sad really the services are great with bank but app experience will ruined the benefits Kindly update it from scratch	en	app far behind others local bank apps sad really service great bank app experience ruin benefit kindly update scratch	Negative	App Store	Ashalby	4/3/23 23:24	Apple pay not working and slow response				en	sa	1	0	0
App Store	Albilad	db0d6e70-e92a-4228-bd13-1647726ffee3	This app crashes more often and it even hangs while logging out or traversing through options.	en	app crash often even hang log traverse options	Negative	App Store	riy12	6/7/23 20:18	App crashes				en	sa	0	1	1
App Store	Albilad	d9d35573-915c-4141-bbf6-025a78298094	Error- Failed to connect to Albilad server.	en	error fail connect albilad server	Negative	App Store	Zeegarkhan	2/28/23 6:02	Error- App not working Since a week				en	sa	0	1	0
App Store	Albilad	8211bb43-f735-41a6-8a46-1e12569b3efb	This app is just pure stupid, by all means using transferring, and even using the app. Why do you ask me about my personal info like to withdraw my money??? I donât want to answer when the question is are you either rich and famous or illiterate????????	en	app pure stupid mean use transfer even use app ask personal info like withdraw money dont want answer question either rich famous illiterate	Negative	App Store	S.Break	6/8/23 8:49	Stupid app				en	sa	1	1	0
App Store	Albilad	bce51891-58d2-4c72-8f04-3cfbb7f19456	Application is not working since two days, message with could not connect to server shown	en	application work since two days message could connect server show	Negative	App Store	Ahhsaad	2/28/23 6:26	App is not working				en	sa	0	1	0
App Store	Albilad	814ce009-fa0c-4568-9ab8-640ae7e68707	Itâs one the worst bank I have ever seen in my whole life. You will need to go several times to have your issue resolved. Almost a month and nothing happened	en	one bad bank ever see whole life need go several time issue resolve almost month nothing happen	Negative	App Store	New update please check it	3/30/23 13:35	Worst band ever in my experience				en	sa	1	0	0
App Store	Albilad	2f658722-c7a1-4e2d-8bc6-fdb312574eea	Face ID is not being activated same as Quick Access. Ipad version is not available yet! We are waiting for ages now!!! Developers of this app: Would you please, DO SOMETHING! :â)	en	face id activate quick access ipad version available yet wait age developers app would please something	Negative	App Store	$am84	10/20/22 10:58	Instead of improving it’s getting worse!				en	sa	0	1	0
App Store	Albilad	1f82e7e1-eab9-43a8-83d5-83754316e886	There is an issue with app ( canât connect with albilad servers) and the problem was not solved for several days :/	en	issue app cant connect albilad servers problem solve several days	Negative	App Store	هندا	2/27/23 7:46	App not working for several days				en	sa	0	1	0
App Store	Albilad	14432f83-d3dc-4ef5-b888-f1155b9a73a2	Dear please update your application Because this application not make transactions! When we complete all selections after that We beed to confirm ! But this option not work! Please help usp	en	dear please update application application make transactions complete selections be confirm option work please help usp	Negative	App Store	dresgtsf	11/17/22 13:30	Not Confirm any transactions from this app				en	sa	0	1	0
App Store	Albilad	3c174f79-d9ee-4bc1-9fd4-bc903a00e461	The app is not working in pakistan is there any solution I canât access to my account from my home country pakistan.. the error shows network error try again	en	app work pakistan solution cant access account home country pakistan error show network error try	Negative	App Store	shanikhan77	1/21/23 15:03	Not working Outside KSA				en	sa	0	1	0
App Store	Albilad	837308e1-6333-4947-ae1b-dd2d340107df	The application is not working properly, always hanging and service unavailable please try again later ðð, please fix it	en	application work properly always hang service unavailable please try late please fix	Negative	App Store	Ahmed Bassiony	6/28/23 12:15	Hanging too much				en	sa	0	1	1
App Store	Albilad	aa692da8-b1b4-4ce9-95d0-dd6b7e092ae4	Not working since last update	en	work since last update	Negative	App Store	yaso7	2/28/23 11:00	Bad update				en	sa	0	1	0
App Store	Albilad	b76d225f-3605-4490-aa51-8e88b038eba2	The app not able to download its transfer me to payment information	en	app able download transfer payment information	Negative	App Store	Wjsgvw	7/6/23 19:27	Not working				en	sa	0	1	0
App Store	Albilad	9f757e39-0483-4fce-9377-26cf60b17e1b	This app could be the worst app in general, not just in banking apps. I suggest a completely new app.	en	app could bad app general bank apps suggest completely new app	Negative	App Store	ABuraidi	8/25/23 14:09	Tear down and start up again from scratch				en	sa	1	0	0
App Store	Albilad	39c5a6dc-de64-4139-945c-7fe0a0ec4e01	Wallahi i didnât see a bank like this i can buy an app for 1000 riyal better than this app and this system!	en	wallahi didnt see bank like buy app riyal good app system	Negative	App Store	Gostpoost	8/27/23 11:52	Worst bank ever				en	sa	1	0	0
App Store	Albilad	9a9f940d-d1a3-4039-ba23-2163cdc3dcc2	The app does not accept login & shows error all the time. Please provide the updated version Thanks	en	app accept login show error time please provide update version thank	Negative	App Store	Abu.Kha	3/4/23 13:11	App not working				en	sa	0	1	0
App Store	Albilad	881afeb9-e568-4460-bef2-e7293bbacf11	The app is so bad i been trying to sign up for weeks !!! But it's says its not available ! I might cancel my account	en	app bad try sign weeks say available might cancel account	Negative	App Store	IiRa11	10/31/22 13:24	The worst				en	sa	1	1	0
App Store	Albilad	e03e9ab5-529e-4cf3-9af2-1ea7fe99f56e	Unable to perform any service properly!	en	unable perform service properly	Negative	App Store	Elkhal	7/23/22 23:41	Very limited functionality and bad user experience.				en	sa	0	1	0
App Store	Albilad	0e0d7ca7-22b1-476b-82b0-b2934637d54a	Not working since yesterday server connection error	en	work since yesterday server connection error	Negative	App Store	Ashraf Benddary	6/22/23 11:07	Server connection error				en	sa	0	1	0
App Store	Albilad	17f883c7-eedc-4dac-8dec-ad944bb586b1	Try to make new account but at the end system error? Why ?	en	try make new account end system error	Negative	App Store	kashif jarral	4/22/22 11:40	Not working				en	sa	0	1	0
App Store	Albilad	9b492481-3cbe-46ab-964f-9a19d7198739	I canât login using the app since i opened my bank account with you!!!	en	cant login use app since open bank account	Negative	App Store	Faisal0006	9/9/23 17:19	Worst banking app and support				en	sa	0	1	0
App Store	Albilad	4995d07d-f362-48ba-bed6-6aa9a9033e69	This App. stuck on home page. web page is better.	en	app stick home page web page good	Negative	App Store	Omar Alofi	2/12/22 14:32	Omar				en	sa	1	0	1
App Store	Albilad	0bf6a7c1-82c7-4d09-8cb2-599237fe320b	- The application is not polished that u feel you are using something from the last century - A lot of errors - you need to go to the website to change passwords - to be honest i cannot believe the application is that bad in 2022	en	application polish u feel use something last century lot errors need go website change passwords honest believe application bad	Negative	App Store	Wsenpai	4/27/22 10:17	Need a lot of improvement				en	sa	1	1	0
App Store	Albilad	e928a8bf-d7f0-404b-ba64-a89c461ce194	Literally canât browse the app without crashing every 10 sec	en	literally cant browse app without crash every sec	Negative	App Store	Ashenfaris	5/27/23 21:53	Worst albank app				en	sa	0	1	0
App Store	Albilad	56fb6188-3215-4c20-9637-e993a2281011	The application is always lagging and you have to keep log in every time.	en	application always lag keep log every time	Negative	App Store	Waliy93	8/27/23 13:02	App lagging				en	sa	0	0	1
App Store	Albilad	aff9b740-3136-42f7-a035-57e73cc302d7	It is really badly not working well from long time and not tackling any good actions after updating this appðð½ðð½ðð½	en	really badly work well long time tackle good action update app	Negative	App Store	بن عيسى	8/23/23 14:29	Al Jubail industrial city				en	sa	1	0	0
App Store	Albilad	a37a0868-5544-4d88-8e98-2f07e854bbb9	The app isnât working!!	en	app isnt work	Negative	App Store	Gaooxshb	2/27/23 23:38	The app isn’t working!!				en	sa	0	1	0
App Store	Albilad	437ea41f-5d9e-4e45-8912-5117c1af36e2	It doesnât work most of time .. ????!!	en	doesnt work time	Negative	App Store	aldahmi10014	2/26/23 23:01	The worst app ever				en	sa	0	1	0
App Store	Albilad	9a582506-fbfa-472d-a420-bfedaf73527e	Very bad	en	bad	Negative	App Store	محمد ٥٣٣٦٦٥	6/6/23 18:39	Worst bank app I've dealt with				en	sa	1	0	0
App Store	Albilad	3fb4e2bc-1fe9-4746-be61-c88cb8f90c3f	The app not working	en	app work	Negative	App Store	Eyad GTR	3/1/23 4:46	App not working				en	sa	0	1	0
App Store	Albilad	e04a4a9b-e742-4c22-9b5a-048e00d51bf8	Very bad app	en	bad app	Negative	App Store	ابن الصصحراء	8/27/23 16:20	فاشششششل very bad app				en	sa	1	0	0
App Store	Albilad	bcc75078-3129-43ca-8ba6-429e17a1b8d0	This app is not working since yesterday 24-02-2023.when I tried to open the acount it shows Failed to connect server.Please Solve it	en	app work since yesterday try open acount show fail connect serverplease solve	Negative	App Store	inakz0007	2/25/23 13:00	Application error				en	sa	0	1	0
App Store	Albilad	45908dcf-ea7a-4f43-a696-6aeae14dbeb0	Bad	ps	bad	Negative	App Store	❤️❤️❤️🌱	5/31/22 9:26	سيء				en	sa	1	0	0
App Store	Albilad	964bcd72-9363-4c51-b486-1edda12edff1	Unfortunately, and despite my several attempts, the app doesnât work outside Saudi, the loading page after entering the username and password loads indefinitely! I tried uninstalling the app and installing it back again, and made sure that i have the latest iOS but without any luck! I was able to access the online platform using a PC though!	en	unfortunately despite several attempt app doesnt work outside saudi load page enter username password load indefinitely try uninstalling app instal back make sure late ios without luck able access online platform use pc though	Negative	App Store	Moayadsk2017	2/4/23 4:12	The App doesn’t work outside Saudi				en	sa	0	1	0
App Store	Albilad	d9fdb362-fa1a-42f8-80e3-8806f169220a	This is on of the worst apps you can find for banking services! After any click inside the app an âInternet connection issueâ message appears then you have to click on âproceedâ!!! Moreover, in every update we expect to see some enhancements in the layout, process, structure of the app, compatibility â¦etc. but nothing at all! Albilad Top management should seriously think of the bad rati…	en	bad apps find bank service click inside app internet connection issue message appear click proceed moreover every update expect see enhancements layout process structure app compatibility etc nothing albilad top management seriously think bad ratings app store listen users feedback find solutions immediately move bank	Negative	App Store	Imuhaned	2/21/23 22:42	Worst banking application!				en	us	1	1	0
App Store	Albilad	72dc2e58-9d44-4855-9228-2993032ebd5c	Iâm a new client of Albilad, still canât use my account because it gives me a weird message about not meeting the minimum security requirements. I believe an update from the developer is required.	en	im new client albilad still cant use account give weird message meet minimum security requirements believe update developer require	Negative	App Store	HeRO_2000	7/10/23 3:32	App doesn’t work on iOS 16.5.1				en	us	1	1	0
App Store	Albilad	d12bf9cd-faca-4624-b815-51e9c98805d0	Wonât let me register, system is always down, customer service never responds, incompetence all the way down	en	wont let register system always customer service never respond incompetence way	Negative	App Store	Gorrillaman	9/18/23 12:16	Can’t register				en	us	1	1	0
App Store	Albilad	cbd13bac-dd65-4543-81da-84eaaee15c44	This is without doubt the worst app in this universe there will not be any app that is worst than this you canât do anything with it	en	without doubt bad app universe app bad cant anything	Negative	App Store	MSQ010	8/29/23 3:01	Worst app in the history of mankind				en	us	1	0	0
App Store	Albilad	6aca7a5f-d49d-448a-8b9f-32574cbc7c78	So ugly and lacks features. Too slow as well. Many features requires a call to customer service!!! So stupid.	en	ugly lack feature slow well many feature require call customer service stupid	Negative	App Store	lamajed	7/27/22 16:46	Ugly under developed app!				en	us	1	1	1
App Store	Albilad	0a7f90d5-abed-494f-9e00-b8a56be8f4d6	One of the worst, bravo!	en	one bad bravo	Negative	App Store	Muhammad Alenzy	8/18/23 16:35	One of the worst, bravo!				en	us	1	0	0
App Store	Albilad	fab3daf1-7c15-4e9a-af23-2c765cd76686	It needs an update. Look at the Al Rajhi application, it is much easier and the bank calls you. This one needs you to call, and the options are difficult and unavailable.	ar	need update look al rajhi application much easy bank call one need call options difficult unavailable	Neutral	App Store	نمتللل	4/29/22 13:53	سيء				en	sa	1	0	0
App Store	Albilad	8d89cde4-5b21-4afb-8134-28b3f9248dea	From the old banks, I don't know if they evolved or remained old-fashioned.	ar	old bank dont know evolve remain oldfashioned	Neutral	App Store	sultan abubakar	4/29/22 2:49	في تحديثات				en	sa	1	0	0
App Store	Albilad	a349fced-8f56-4cc9-9f8f-d5aea259c9cf	The application needs modification and to be made more comfortable and easier to use.	ar	application need modification make comfortable easy use	Neutral	App Store	tarfah fa	6/22/23 12:29	التطبيق محتاج اصلاح و تطوير				en	sa	1	0	0
App Store	Albilad	cd59b392-23e4-4519-bf85-4d8b7bcb5c57	Attachments cannot be included in a card application, whether it's an image or PDF.	ar	attachments include card application whether image pdf	Neutral	App Store	ابو ناصر الذيابي	6/6/23 10:00	المرفقات				en	sa	0	1	0
App Store	Albilad	7710d344-3bfd-477e-b275-cf8be0e2552a	If you open the application and want to transfer, you will receive a message saying "Error, login session expired."	ar	open application want transfer receive message say error login session expire	Neutral	App Store	😍😍Tabuk	5/25/23 14:13	التطبيق لا يعمل بعد التحديث				en	sa	0	1	0
App Store	Albilad	3399921c-c03d-410d-8959-0e81a8b493c1	The application needs to be developed and the user interface modified.	ar	application need develop user interface modify	Neutral	App Store	هل يوجد تحديث جديد	5/25/23 4:19	التطبيق ممتاز				en	sa	1	0	0
App Store	Albilad	c409624e-eae6-4d6e-9e89-d943a11c752a	And most of the time he is idle.	ar	time idle	Neutral	App Store	saifalkoipurhzah	4/4/23 18:44	تطبيق ينقصة الكثير				en	sa	0	0	0
App Store	Albilad	be8d0051-1e34-4263-9543-8c5d97967caf	In the transfer field, it needs to be modified to a simpler mode.	ar	transfer field need modify simple mode	Neutral	App Store	Gauss KSA	3/7/23 14:33	يحتاج تعديل على خانة التحويل				en	sa	1	0	0
App Store	Albilad	eb218680-a2da-457f-ae7f-a21aaf8f264c	Cannot access the application.	ar	access application	Neutral	App Store	ابو جسار 7171	3/3/23 12:36	التطبيق متعطل من 10 أيام				en	sa	0	1	0
App Store	Albilad	2cc00e25-5d59-42c3-a7a2-b9349b1b1b25	I hope to completely change the application, from the user interface to adding services and solving the issue of continuous freezing.	ar	hope completely change application user interface add service solve issue continuous freeze	Neutral	App Store	id id wz	2/26/23 2:15	علي				en	sa	1	0	1
App Store	Albilad	468a5b22-bfec-49f4-8b5f-21c3da27246a	It is advisable to repeat the process several times until it is completed successfully. It gives a message (No internet connection). And the internet is functioning perfectly at 100%.	ar	advisable repeat process several time complete successfully give message internet connection internet function perfectly	Neutral	App Store	أبو صالح Saleh	2/25/23 19:47	سيء في الفترة الأخير				en	sa	0	0	0
App Store	Albilad	206626ac-2b5e-44f7-840c-01136ac0f580	He hasn't been working for two days.	ar	hasnt work two days	Neutral	App Store	Demor3110	2/25/23 19:12	لا يعمل صارله يومين				en	sa	0	1	0
App Store	Albilad	54efcf66-db2e-44f6-829f-3d8bc604f0d7	No competition in technology	ar	competition technology	Neutral	App Store	ahmadfaad	2/24/23 14:07	مش منافس في التقنية				en	sa	1	0	0
App Store	Albilad	69fff09f-a354-49e5-80de-f541545c4449	The application would have been similar if it had been available since the establishment of the bank and had not been developed. I hope it is developed.	ar	application would similar available since establishment bank develop hope develop	Neutral	App Store	Meshal mms	1/25/23 6:43	ان كنتم تريدون النجاح				en	sa	1	0	0
App Store	Albilad	5f9144ae-99bd-432b-90ff-0319bd9e3564	Until now, your application needs some services, such as renewing the ATM card. Unfortunately, banks have made it complicated, but for the renewal, you have to visit the bank. Best regards. ð	ar	application need service renew atm card unfortunately bank make complicate renewal visit bank best regard	Neutral	App Store	النانو	12/7/22 20:24	البطاقات				en	sa	1	1	0
App Store	Albilad	dd54c900-251a-443f-9401-a79c4a1411da	The application does not work from the browser but it works from the application.	ar	application work browser work application	Neutral	App Store	K66sa	12/1/22 9:57	التطبيق لا يعمل من المتصفح يشتغل ولاكن من التطبيق لا يعمل				en	sa	0	1	0
App Store	Albilad	082f27f8-a338-48b9-a9df-ddcf2af0b231	To authenticate the device, it requests the PIN of the card!!	ar	authenticate device request pin card	Neutral	App Store	سعد ،،،	11/29/22 20:53	لتوثيق الجهاز يطلب الرقم السري للبطاقه!!				en	sa	0	1	0
App Store	Albilad	f3502027-da03-49d8-a9b2-e910b2deef05	It hangs a lot.	ar	hang lot	Neutral	App Store	nader7n7	11/26/22 16:27	التعليق المشكله				en	sa	0	0	1
App Store	Albilad	8e93681b-9357-4080-86f8-4d55c58ea365	Quick access and fingerprint recognition are complex. ðð»	ar	quick access fingerprint recognition complex	Neutral	App Store	يحيى جابر محمد	10/13/22 16:25	لا تعمل				en	sa	0	1	0
App Store	Albilad	fc7d474b-7306-4c0c-a9e8-9bd135c66275	I hope you update your application to version 16.0.	ar	hope update application version	Neutral	App Store	ابو يوسف رشيد	9/14/22 19:59	نزل تحديث اصدار 16،0 لايفون				en	sa	1	0	0
App Store	Albilad	6cee394a-1360-4b60-9eb4-bcd059dac707	It needs a comprehensive update in terms of design and formatting, similar to Al Rajhi, Al Jazeera, and SABB applications.	ar	need comprehensive update term design format similar al rajhi al jazeera sabb applications	Neutral	App Store	احمد آل سعد	9/10/22 8:37	تحديث				en	sa	1	0	0
App Store	Albilad	b81587a3-a4b7-4a62-b852-28bf9459c06a	You should keep up with the generation.	ar	keep generation	Neutral	App Store	بوالبقاء	6/12/22 22:19	برنامج يحتاج برمجة				en	sa	0	0	0
App Store	Albilad	beb0fb38-3cc2-4f82-8e0e-c918f4ee238f	Despite the continuous updates, the compatibility issue with the token application still persists. The token application is installed on the device, but when it is used for operations, it appears that the application needs to be installed again!	ar	despite continuous update compatibility issue token application still persist token application instal device use operations appear application need instal	Neutral	App Store	بريكي	5/27/22 2:55	غير عملي				en	sa	0	1	0
App Store	Albilad	62ecba75-cb0e-40ca-be2a-971484f6a14d	We hope to launch the country's application for company transactions.	ar	hope launch countrys application company transactions	Neutral	App Store	abofahad989	3/2/22 15:26	البلاد أعمال				en	sa	1	0	0
App Store	Albilad	38d66450-0e0a-4f9c-873b-2849a7e80f9a	Often, there is a lag when pressing the colon key to open the last menu, and this requires closing the program completely and reopening it.	ar	often lag press colon key open last menu require close program completely reopen	Neutral	App Store	iAAA+++	5/23/22 23:30	تعليق أثناء الصغط على رمز (النقطتين)				en	sa	0	1	1
App Store	Albilad	9c97fed2-2d78-411e-be30-66db9a7d2083	I have been trying to register my account on the application for 3 days.	ar	try register account application days	Neutral	App Store	والله معرف ايش اكتب في الاسم	3/2/22 18:34	الخدمة غير متاحة ٢٤ساعة ولا ايش الوضع				en	sa	0	1	0
App Store	Albilad	8d02c146-4df1-419f-9780-26bdca40584b	Please add a dark mode.	ar	please add dark mode	Neutral	App Store	المـوسيـقـار	1/21/22 8:19	Please add Dark Theme				en	sa	1	0	0
App Store	Albilad	0c44dc19-3325-44bf-994d-d3ca901244b7	The application needs a major update and a complete change.	ar	application need major update complete change	Neutral	App Store	Fahad123321	8/24/23 4:35	مشاكل تقنيه				en	us	1	0	0
App Store	Albilad	319e42a7-3b64-4515-a0bf-88f2faf6c294	the only version of the bank app is for iphone only. please make another one for iPad	en	version bank app iphone please make another one ipad	Neutral	App Store	Mohammed Aljabal	10/4/22 6:02	We need IPad version				en	sa	0	1	0
App Store	Albilad	14dcd917-cd64-478e-89d5-ed9d2d61d633	Not working since Wednesday	en	work since wednesday	Neutral	App Store	Alex Kurian	2/25/23 6:54	Not working				en	sa	0	1	0
App Store	Albilad	6978cb05-c5e8-4d19-8bcf-14150b60b3e4	Need two to four times attempting to can access into the app	en	need two four time attempt access app	Neutral	App Store	Shinrat	6/21/23 11:27	The worst				en	sa	0	1	0
App Store	Albilad	0c9d00f4-09db-4c23-b32d-0d3da17d82c8	Not working	en	work	Neutral	App Store	MAS@121983	3/5/23 19:19	It is not working now				en	sa	0	1	0
App Store	Albilad	a43b88a8-8a25-4bce-aec7-54fc9098ddb0	I cannot log in using the App; however, I can log in using the browser.	en	log use app however log use browser	Neutral	App Store	iMuna_21	4/26/22 19:42	Worst App Ever				en	sa	0	1	0
App Store	Albilad	f2b1ad0f-dd9e-4e74-b8ec-58f5055d7330	Writing in English does not appear for me in the Bank Albilad app	en	write english appear bank albilad app	Neutral	App Store	الراااااااااااااائد	6/25/22 14:01	Problem in app				en	sa	1	1	0
App Store	Albilad	a41143c3-48a1-4529-a608-9bf37be95507	We need updare app like al rajhi bank or al Ahli bank	en	need updare app like al rajhi bank al ahli bank	Neutral	App Store	5ayal aldossry	7/3/22 8:36	Update app				en	sa	1	0	0
App Store	Albilad	51bba280-f7a4-4ab9-b361-d91bd5cef8f4	Slow - breakdown	en	slow breakdown	Neutral	App Store	Alharbi222	5/16/23 11:41	Slow - breakdown				en	us	0	0	1
App Store	Albilad	5a3b4732-99a6-4023-8d3e-c974642ba0e4	Peace be upon you and God's mercy and blessings. We used to praise the application of Al Bilad Bank and the services it offers. However, recently, unfortunately, the Al Bilad Bank application has become one of the worst applications and it does not keep up with the rapid development caused by other banks.	ar	peace upon gods mercy blessings use praise application al bilad bank service offer however recently unfortunately al bilad bank application become one bad applications keep rapid development cause bank	Positive	App Store	متفأل بقدر الطموح	8/27/23 10:22	النظر في التطبيق				en	sa	1	0	0
App Store	Albilad	e56b2d64-e68c-418a-aef4-7e2d83bb885f	The application is working perfectly for me so far, although its only issue is the lack of the option to transfer to charities. I believe that having this service is an essential demand for Bank Al-Bilad customers, many of whom belong to the conservative category and value the presence of this service. Thank you.	ar	application work perfectly far although issue lack option transfer charities believe service essential demand bank albilad customers many belong conservative category value presence service thank	Positive	App Store	N_D)	7/26/23 20:25	التحويل للجمعيات الخيرية				en	sa	1	1	0
App Store	Albilad	aea611b2-1e1b-485a-91a0-c1ed12000571	Learn from Al Rajhi Bank, the designer is very clear and primitive. Invest in the application and bring a good company to make a program.	ar	learn al rajhi bank designer clear primitive invest application bring good company make program	Positive	App Store	Sultan	5/24/23 20:48	تعيس				en	sa	1	0	0
App Store	Albilad	8b50979f-4e2f-49cc-a05f-ada0f4f25934	It needs more development and be user-friendly. Thank you.	ar	need development userfriendly thank	Positive	App Store	DAHHEM	3/5/23 17:42	ً				en	sa	1	0	0
App Store	Albilad	65f38312-0d31-4d6b-8918-53dd690f4ac3	Unfortunately, all banks have developed their applications and become competitive in the market, except for Bank Al Bilad. I hope you can develop it and your customers deserve the best because you are the best. I hope that one of the responsible individuals sees my comment and resolves the situation.	ar	unfortunately bank develop applications become competitive market except bank al bilad hope develop customers deserve best best hope one responsible individuals see comment resolve situation	Positive	App Store	رامبو الغربية	2/28/23 16:29	حان وقت التغيير				en	sa	1	0	0
App Store	Albilad	af93420a-7a7d-455e-8e8c-7741c2cc8a62	Some excellent banks.	ar	excellent bank	Positive	App Store	saqralbana	1/21/23 21:30	بنك مممتاززز				en	sa	0	0	0
App Store	Albilad	74d7cd4d-1092-4b5f-995f-6eab45143d1f	The application that impacted my life the most.	ar	application impact life	Positive	App Store	taher aa	11/6/22 10:35	أبو التعليق				en	sa	1	0	0
App Store	Albilad	8ced807c-e766-4c5e-b2ff-24e7f847b56a	It used to be one of the best and most distinguished banking applications, but recently there have been abnormal delays at different times, and with the advancement and excellence of other banking applications, I hope for an improvement in the performance of the application and for it to function as required.	ar	use one best distinguish bank applications recently abnormal delay different time advancement excellence bank applications hope improvement performance application function require	Positive	App Store	Abaiq	3/30/22 10:44	سيء جداً 👎🏻				en	sa	1	0	1
App Store	Albilad	687a2c64-d5b3-4c27-8fff-064ab01ae533	The payment service is easy and reliable. The application design is elegant. May you be blessed.	ar	payment service easy reliable application design elegant may bless	Positive	App Store	عزيز---	1/24/22 10:18	رائع وسهل				en	sa	1	0	0
App Store	Albilad	6d4dff79-5a80-49f2-a425-05afb33e3cf2	Al bilad bank very good I m and my all friends very happy with this bank excellent service staff very good specialy Malik road branch near Hera street jeddah	en	al bilad bank good friends happy bank excellent service staff good specialy malik road branch near hera street jeddah	Positive	App Store	923000000000	10/29/22 11:41	Muhammad Rashid rafique				en	sa	0	0	0
App Store	Albilad	d35d1522-5d3d-41cb-8402-581329f203ee	Good	en	good	Positive	App Store	Riaz pateary	10/4/22 17:52	Good				en	sa	0	0	0
App Store	Albilad	1e6424a5-76e0-4d83-bc61-ab966012b920	I like it	en	like	Positive	App Store	TempTFK	2/8/22 10:31	Great App				en	sa	0	0	0
