# Supplementary material for: Retrieval-augmented generation analysis of user reviews in Saudi mobile banking apps: a comparative user experience study of iOS and Android
Source: PeerJ journal article supplement (doi:10.7717/peerj-cs.3565), 2026-02-06
Supplement: iOS.zip [file Alinma-Bank_final.xlsx]

## Sheet: Sheet 1 - Alinma-Bank_final
Alinma-Bank_final
source	app_name	review_id	review_description	en	cleaned_reviews	Sentiment	ï»¿source	review_date_y	user_name	review_date	review_title	developer_response	developer_response_date	thumbs_up	language_code	country_code	Satisfaction	Effectiveness	Efficiency
App Store	Alinma-Bank	2d224ab6-e411-4bbe-a026-0f23116476b6	The worst bank I have dealt with and its policies are inflexible.	ar	bad bank deal policies inflexible	Negative	App Store	5/27/23 19:58	Ali.Abdelrazek	5/27/23 19:58	تجربه سيئه فعلا				en	eg	1	0	0
App Store	Alinma-Bank	d1111386-4009-4dc4-b6dd-c5595b040f1b	The Taba branch in Tabuk has very bad service. You feel like you're going to be ripped off by them. The employee at the counter has a very bad attitude.	ar	taba branch tabuk bad service feel like youre go rip employee counter bad attitude	Negative	App Store	4/13/22 13:21	احمد ديعو	4/13/22 13:21	تبوك				en	eg	1	0	0
App Store	Alinma-Bank	bb12642a-1e76-4949-8ea1-b78971881e60	The program is very primitive, it has never evolved and will never evolve. People have reached the moon while they are still stuck with a very old system. The customer service is terrible, everyone just dismisses you and hangs up. To activate, I had to wait a long time, while other banks activate through a mobile number.	ar	program primitive never evolve never evolve people reach moon still stick old system customer service terrible everyone dismiss hang activate wait long time bank activate mobile number	Negative	App Store	3/14/22 14:08	sam3953	3/14/22 14:08	سيء جداً				en	gb	1	0	1
App Store	Alinma-Bank	04d928c5-d3ef-45e8-9c45-3dba3d28a3ca	There is a problem with the new iOS update, it is messy and has security issues!	ar	problem new ios update messy security issue	Negative	App Store	8/25/22 18:05	po6280	8/25/22 18:05	منحاس				en	sa	0	1	0
App Store	Alinma-Bank	e913315d-4e20-4c30-ae82-84a6fcab5c08	Peace be upon you and God's mercy and blessings. I have debts outside the bank, and you have refused to refinance them for me, knowing that my salary with you and all my dues are deducted through you. Why don't you help me with this matter?!	ar	peace upon gods mercy blessings debts outside bank refuse refinance know salary dues deduct dont help matter	Negative	App Store	9/9/22 4:09	شكور91	9/9/22 4:09	بخصوص طلب تمويل				en	sa	1	1	0
App Store	Alinma-Bank	55ae7777-4f9a-46a1-909c-00e96d130248	He was okay at first but then became terrible, annoying and frustrating. I gave him two stars out of fear of injustice, but he doesn't deserve it.	ar	okay first become terrible annoy frustrate give two star fear injustice doesnt deserve	Negative	App Store	6/16/23 22:02	…..….،،	6/16/23 22:02	مو لازم عنوان				en	sa	1	0	0
App Store	Alinma-Bank	3326ac45-d265-4ca9-b8eb-9643049d78ab	I swear by Allah, it's a half star and even worse. Everything is messed up, and once you enter the application, you can't use the card, and every time I try to enter, it tells me to try again later, and it's slow. I hope one of the NCB (National Commercial Bank) employees contacts me honestly.	ar	swear allah half star even bad everything mess enter application cant use card every time try enter tell try late slow hope one ncb national commercial bank employees contact honestly	Negative	App Store	6/10/23 5:57	yazanshbbat	6/10/23 5:57	التطبيق سيئ				en	sa	1	1	1
App Store	Alinma-Bank	cb8e25d2-aa2d-428f-ad0e-5b818b3ff40f	"I request the development of the application because we face difficulties when accessing it quickly, as the application does not open."	ar	request development application face difficulties access quickly application open	Negative	App Store	6/5/23 17:48	ابوعبادي 775	6/5/23 17:48	تطوير التطبيق				en	sa	0	1	0
App Store	Alinma-Bank	291b2049-5c75-421d-959c-cbd61244313e	There are no services on the site, it is very primitive and very bad. The existing services are not available. I was trying to book hotels with points but it is not available or activated, and there is no point redemption.	ar	service site primitive bad exist service available try book hotels point available activate point redemption	Negative	App Store	6/3/23 17:37	r alhassan	6/3/23 17:37	سيى				en	sa	1	1	0
App Store	Alinma-Bank	4868a132-cf13-44e6-81a8-851101a6ac07	And the worst thing is dealing with customer service employees from dawn, I couldn't open the application.	ar	bad thing deal customer service employees dawn couldnt open application	Negative	App Store	5/20/23 17:49	عاشق بوكينغ	5/20/23 17:49	تطبيق سيء للغايه				en	sa	1	1	0
App Store	Alinma-Bank	38d7e8f1-70ad-4317-a23e-ecb44d9eec93	The application has not been working during the past few days.	ar	application work past days	Negative	App Store	5/9/23 16:55	حماد الطلوحي	5/9/23 16:55	لايعمل				en	sa	0	1	0
App Store	Alinma-Bank	d8097a26-af67-47ec-ae6b-0f724bd409af	It is not acceptable to force the user to open the website every time, as central bank systems do not require that. Additionally, this requirement is not present when accessing from computers or internet browsers. Furthermore, it violates privacy and consumes battery power.	ar	acceptable force user open website every time central bank systems require additionally requirement present access computers internet browsers furthermore violate privacy consume battery power	Negative	App Store	2/11/23 2:38	B7R45	2/11/23 2:38	اجبار معرفة الموقع				en	sa	1	0	0
App Store	Alinma-Bank	32538410-2322-4cf1-9013-2afb20fa6053	The latest version forces the activation of the location tracking feature and invades the privacy of the user. The application and the bank have gone from bad to worse, unfortunately.	ar	late version force activation location track feature invade privacy user application bank go bad bad unfortunately	Negative	App Store	2/2/23 11:59	W-S-T	2/2/23 11:59	اختراق للخصوصية				en	sa	1	1	0
App Store	Alinma-Bank	4b29b138-73ae-4b43-bea1-992018a87301	Excellent application but it has a flaw recently, whenever you enter, you have to open the website. We kindly request to remove this feature.	ar	excellent application flaw recently whenever enter open website kindly request remove feature	Negative	App Store	1/31/23 14:47	vendetta_lit	1/31/23 14:47	تطبيق ممتاز				en	sa	1	1	0
App Store	Alinma-Bank	47574c8d-4cce-4ec3-9877-be6c29aa6b54	What right do you have to force us to enable location services on our mobile phones? This is manipulation. Even if you tell the security forces, I would simply say that my laptop does not have location services, so should we cancel using online banking as well? And besides, Android and others have services that can change the real location, so we haven't done anything wrong. Enabling location ser…	ar	right force us enable location service mobile phone manipulation even tell security force would simply say laptop location service cancel use online bank well besides android others service change real location havent do anything wrong enable location service consume battery power run allow applications complicate things please stop require really ruin application year	Negative	App Store	1/31/23 12:41	iPhoneLandica	1/31/23 12:41	location services issue				en	sa	1	1	0
App Store	Alinma-Bank	e8803df9-1137-4949-be85-c7ba6fbd7265	Every time I try to change it, it says the verification code is incorrect!!!	ar	every time try change say verification code incorrect	Negative	App Store	6/6/22 9:23	طوطططططط	6/6/22 9:23	مشكله				en	sa	0	1	0
App Store	Alinma-Bank	8c30b41b-cefd-4d49-ae30-2b5fe9614f8d	It is very bad and does not work on my device. I updated the application and the problem continues. I cannot access my account. I contacted the bank and they filed a complaint, but my problem has not been resolved.	ar	bad work device update application problem continue access account contact bank file complaint problem resolve	Negative	App Store	9/20/23 18:20	@faisalo_o	9/20/23 18:20	لايعمل				en	sa	1	1	0
App Store	Alinma-Bank	8c7296ba-77fb-481b-a448-50602fd92725	They told me that you were chosen to try the new application, which prevents me from using it. When I tried to use the new application and enter the password, the screen froze.	ar	tell choose try new application prevent use try use new application enter password screen freeze	Negative	App Store	9/20/23 16:10	Elyas mehdar	9/20/23 16:10	ما يشتغل				en	sa	0	0	1
App Store	Alinma-Bank	7ae60477-738e-48cc-bd9c-a78bfaa3e9ef	Unfortunately, the application lacks even the basics. Where is the fast login feature? The transfers, ease of use, and design, unfortunately, do not meet the required quality to suit Alinma Bank.	ar	unfortunately application lack even basics fast login feature transfer ease use design unfortunately meet require quality suit alinma bank	Negative	App Store	9/18/23 16:41	EEngMaher	9/18/23 16:41	تطبيق اسوأ من النسخه القديمه				en	sa	1	1	0
App Store	Alinma-Bank	c3de2bc0-2fb9-4985-a9b0-5f0755ef87ed	The worst does not work, neither the old nor the new.	ar	bad work neither old new	Negative	App Store	9/16/23 11:46	asdcccvg	9/16/23 11:46	فاشل				en	sa	1	1	0
App Store	Alinma-Bank	749774cf-3e37-4dcd-80da-c31c01290759	If your application is faulty, why are you forcing me to download it? I am now transitioning to another bank.	ar	application faulty force download transition another bank	Negative	App Store	9/7/23 18:41	‏مجرب صاحب تجربة	9/7/23 18:41	تطبيق فاشل				en	sa	1	1	0
App Store	Alinma-Bank	90150570-6c13-4f95-929b-d104d4ebc26a	Unfortunately, both the old and new applications did not open for me, which negatively affected my personal account usage. Unfortunately, we hope to resolve the issue.	ar	unfortunately old new applications open negatively affect personal account usage unfortunately hope resolve issue	Negative	App Store	9/7/23 18:37	سالم ظاهر	9/7/23 18:37	لماذا لم يفتح معي التطبيق				en	sa	1	1	0
App Store	Alinma-Bank	3ac6a94c-a334-4889-a3dc-51bfaa3ac261	One of the best banks in the kingdom, but its problem is that it has few branches. It does not have a branch in Samtah or Ahad Al Masarihah in the Jazan region.	ar	one best bank kingdom problem branch branch samtah ahad al masarihah jazan region	Negative	App Store	8/31/23 11:16	عبدالله كريري	8/31/23 11:16	أحد المسارحة				en	sa	0	0	0
App Store	Alinma-Bank	2e294fd6-1f68-446e-8caf-9704874d749c	Why can't bills be paid with Visa? Other banks have this feature.	ar	cant bill pay visa bank feature	Negative	App Store	8/14/23 13:27	محمد الحواس	8/14/23 13:27	الفيزا				en	sa	0	1	0
App Store	Alinma-Bank	f40830ab-0f03-4169-ad06-061aa9e18b10	Every time I want to enter the application, I have to open the website. What's the point of this stupidity?	ar	every time want enter application open website whats point stupidity	Negative	App Store	8/13/23 15:06	Fafiona	8/13/23 15:06	تخلف				en	sa	0	1	0
App Store	Alinma-Bank	e0f4d062-e5be-4957-b31d-40a3ea0e0000	Logging in has become almost impossible.	ar	log become almost impossible	Negative	App Store	8/9/23 13:01	ABS026	8/9/23 13:01	يحتاج الى اصلاح الاخطاء على وجه السرعة .				en	sa	0	1	1
App Store	Alinma-Bank	a37e5fdb-59c8-4804-922f-6f8056ab33ef	Unfortunately, they have closed my account for no reason. And I have had a problem for a week, but instead of solving it, they closed my account.	ar	unfortunately close account reason problem week instead solve close account	Negative	App Store	7/27/23 22:35	سلمى١٢	7/27/23 22:35	تطبيق فاشل جدا				en	sa	0	1	0
App Store	Alinma-Bank	59823a53-7460-45ed-8a77-a5601289ab12	My account was closed without a reason.	ar	account close without reason	Negative	App Store	7/23/23 9:56	محهاشم	7/23/23 9:56	ا				en	sa	0	0	0
App Store	Alinma-Bank	6709e36c-7482-4e4e-8da9-b5dc2d1fde69	Where fingerprint access is not supported, and there is no support for payment bill issues. And adding accounts is a failure, especially with Alinma accounts. And other problems, in short, a very failed application.	ar	fingerprint access support support payment bill issue add account failure especially alinma account problems short fail application	Negative	App Store	7/22/23 21:49	Mohammeeeeeed	7/22/23 21:49	التطبيق فاشل جدا				en	sa	0	1	0
App Store	Alinma-Bank	f5469313-72f3-492d-b0f8-1f28b89210fb	The application is very bad and slow. I hope they improve the quality of the application because the customer service at the branches and on the phone is excellent. The bank is very respectable, but unfortunately, the application is not up to par.	ar	application bad slow hope improve quality application customer service branch phone excellent bank respectable unfortunately application par	Negative	App Store	7/21/23 17:37	O7a6na	7/21/23 17:37	التطبيق				en	sa	1	0	1
App Store	Alinma-Bank	7533a5b2-265c-463a-b9d5-42d81ba4482b	It means: "I'm tired of updating everything for you."	ar	mean im tire update everything	Negative	App Store	7/18/23 4:14	000000ًً	7/18/23 4:14	.				en	sa	1	0	0
App Store	Alinma-Bank	1e4323ba-da37-4864-886e-721fde2f19ec	This program is exhausting me, what is this?	ar	program exhaust	Negative	App Store	6/27/23 3:29	namjrawbi	6/27/23 3:29	خراااا				en	sa	1	1	0
App Store	Alinma-Bank	f3e256e2-530a-48e3-8f26-912c4d6c4e38	Why isn't the application opening for me?	ar	isnt application open	Negative	App Store	6/25/23 18:57	Hffdd7265272	6/25/23 18:57	مايفتح				en	sa	0	1	0
App Store	Alinma-Bank	d842aae0-844f-452b-9f9b-7b22d935a757	Bad, bad, bad. It means one cannot benefit at all. All the applications do not work, what is the use then? It is impossible for me to sit in this bad bank. They cannot even do the simplest thing, they frustrate people.	ar	bad bad bad mean one benefit applications work use impossible sit bad bank even simple thing frustrate people	Negative	App Store	6/25/23 15:03	112233asam112233	6/25/23 15:03	سيءءء				en	sa	1	1	1
App Store	Alinma-Bank	0067f9ec-e2e4-4d32-a20e-7199412c066f	The application is not working after the latest update!	ar	application work late update	Negative	App Store	6/25/23 11:40	Mohammed r	6/25/23 11:40	لايعمل بعد التحديث الاخير				en	sa	0	1	0
App Store	Alinma-Bank	73176fc2-c43b-4e94-a969-a322528af9c3	Please remove some of the complications in the Enmaa app.	ar	please remove complications enmaa app	Negative	App Store	5/30/23 22:32	بو أحمداني	5/30/23 22:32	تعقيد في التطبيق				en	sa	1	1	0
App Store	Alinma-Bank	f1b3777a-40eb-4c97-9d9e-3d44726e6885	All their electronic services are bad. Self-service devices deduct money from you when renewing the ATM card and you don't receive the card. Secondly, the mobile application freezes when trying to access the fast login with fingerprint. I advise dealing with other banks that have easier transactions, such as Al Rajhi, Al Ahli, and Riyadh, all of which are excellent.	ar	electronic service bad selfservice devices deduct money renew atm card dont receive card secondly mobile application freeze try access fast login fingerprint advise deal bank easy transactions al rajhi al ahli riyadh excellent	Negative	App Store	5/25/23 19:50	nag uoxhsjji	5/25/23 19:50	سئ للغاية				en	sa	1	1	1
App Store	Alinma-Bank	fad98a5b-5319-4a4d-ad5e-1cca88837fae	And no better. Multiple services, domestic and international. ðªð¼	ar	good multiple service domestic international	Negative	App Store	5/16/23 11:06	SULIMAN7A	5/16/23 11:06	فخم				en	sa	0	0	0
App Store	Alinma-Bank	a68f1588-6ab4-48af-b222-57f5e6cda89d	The application does not open for me for two weeks now. Is there a problem on your end?	ar	application open two weeks problem end	Negative	App Store	5/19/23 1:19	وليد الشرهان	5/19/23 1:19	الرياض				en	sa	0	1	0
App Store	Alinma-Bank	356223bd-e3b1-4386-9b43-5e813d8f8c0a	When are you planning to update the program's design from the inside, as it has become old and boring? All bank programs are better than this.	ar	plan update program design inside become old bore bank program good	Negative	App Store	5/10/23 20:06	1238sayd	5/10/23 20:06	👎🏻				en	sa	1	0	0
App Store	Alinma-Bank	ecdde91a-997d-4983-8ed1-74eaa5a2e9fb	Your update is very difficult. It's not like Al Ahli app. If you go to the bank, I swear they'd tell you to give them your ID, then they'd say you're not the person in the picture. I really don't know what to say about this bank. Updates from other banks don't ask you who you are or anything, but Alinma Bank, the branch in Seteen, Al Bawadi neighborhood, is very different. Only one man runs it.	ar	update difficult like al ahli app go bank swear theyd tell give id theyd say youre person picture really dont know say bank update bank dont ask anything alinma bank branch seteen al bawadi neighborhood different one man run	Negative	App Store	5/4/23 17:05	yassen96	5/4/23 17:05	جده				en	sa	1	0	0
App Store	Alinma-Bank	a67dc820-91fa-4335-9fb8-f26031dbdd77	When I try to log in, the application logs me out. Please fix the issue.	ar	try log application log please fix issue	Negative	App Store	5/2/23 19:24	عواد رجاء	5/2/23 19:24	تسجيل الدخول				en	sa	0	1	0
App Store	Alinma-Bank	8b108fe8-c3ff-40fc-81f1-f57e3689e8f7	After the new update, it became very bad and I can't log in. It caused me many problems to the point that my card stopped working because of it.	ar	new update become bad cant log cause many problems point card stop work	Negative	App Store	4/30/23 13:13	Fc bayern8	4/30/23 13:13	سيء				en	sa	1	1	0
App Store	Alinma-Bank	d6a64d29-bf8c-4546-991c-d7a2a4f023c4	They violate the client's privacy by obligating them to share their location and specify it.	ar	violate clients privacy obligate share location specify	Negative	App Store	4/25/23 3:05	La906490	4/25/23 3:05	ينتهكون خصوصية العميل بالزامة بمشاركة موقعه				en	sa	1	0	0
App Store	Alinma-Bank	9d632805-e309-4fd6-8212-714d8292af05	Every time I enter the password, it logs me in for two seconds and then kicks me out for a month and a half. So, the application doesn't let me in every day and it freezes. I want to switch, I want to finish my tasks soon. I thought the service was excellent and fast, but it's really terrible after two months of experience.	ar	every time enter password log two second kick month half application doesnt let every day freeze want switch want finish task soon think service excellent fast really terrible two months experience	Negative	App Store	4/20/23 21:27	Faisal Ali ...	4/20/23 21:27	تعليق				en	sa	1	1	1
App Store	Alinma-Bank	b526ef8d-164d-4eef-ae90-79910017aec4	The biggest problem is that I cannot add a beneficiary until at least one day after adding a new device. Unfortunately, this service is very obstructive to work.	ar	big problem add beneficiary least one day add new device unfortunately service obstructive work	Negative	App Store	4/19/23 12:04	خالدالعقيل	4/19/23 12:04	الرياض				en	sa	1	1	0
App Store	Alinma-Bank	d81cf51d-dd49-407e-8ab9-dac87d5b8248	I needed a statement of account and the application is not printing it for me. The mobile service is not working, and the self-service device in the branch is broken. No one is assisting me over the phone, and the branch is closed. May the devil be cursed.	ar	need statement account application print mobile service work selfservice device branch break one assist phone branch close may devil curse	Negative	App Store	4/19/23 11:37	Nasserkhiro	4/19/23 11:37	الخدمات الالكترونية				en	sa	1	1	0
App Store	Alinma-Bank	6a7d63fc-898a-45c6-a5d9-f3b5104f33af	The application is excellent and smooth, but suddenly it decides that the login credentials are incorrect, even though I am sure they are correct, so I have to renew the password.	ar	application excellent smooth suddenly decide login credentials incorrect even though sure correct renew password	Negative	App Store	4/17/23 0:18	any_name_amy	4/17/23 0:18	ما يحفظني كمستخدم				en	sa	1	1	0
App Store	Alinma-Bank	7887735e-43eb-4232-852b-08a611af9ef5	He is very clingy and excessive, even with the new things. Save him. He doesn't deserve any star, but we have to give him one even though he doesn't deserve it.	ar	clingy excessive even new things save doesnt deserve star give one even though doesnt deserve	Negative	App Store	4/16/23 11:08	الناقد السينمائي	4/16/23 11:08	الانماء إلى الهاوية				en	sa	1	0	1
App Store	Alinma-Bank	78db5927-6da8-4530-adc0-0f4a232e6e2b	Great program But in the latest update, it asks you to specify your location. The program doesn't work unless you agree to specify your location. This violates the privacy of customers by unnecessarily requesting their locations from Alinma Bank, even though all forms of authentication are available for access through text or voice messages. I hope that the Central Bank takes action against Alinm…	ar	great program late update ask specify location program doesnt work unless agree specify location violate privacy customers unnecessarily request locations alinma bank even though form authentication available access text voice message hope central bank take action alinma bank bank protect privacy customers address violation privacy thank	Negative	App Store	4/9/23 22:57	Travel7travel	4/9/23 22:57	لا يوجد خصوصية على الاطلاق				en	sa	1	1	0
App Store	Alinma-Bank	b0a18c63-33ef-4fc6-8e20-0ddadc4b3292	Quick login is not working.	ar	quick login work	Negative	App Store	3/31/23 15:29	المفحم	3/31/23 15:29	تسجيل دخول				en	sa	0	1	0
App Store	Alinma-Bank	fee82086-2e48-49bc-97de-e736aaec6fa7	Their only flaw is that they do not have a business development application. If you want business development, you have to do it through the web, and the web is very slow and exhausting. It would be great if they created a business development application for institutions and companies. Institutions and companies need a little attention, in my opinion.	ar	flaw business development application want business development web web slow exhaust would great create business development application institutions company institutions company need little attention opinion	Negative	App Store	3/28/23 1:54	.🌹.❤️	3/28/23 1:54	المدينه المنوره				en	sa	1	0	1
App Store	Alinma-Bank	de3d5a14-1a9b-4f0f-9517-94b060b5d1b5	After the update, instead of fixing the problems, they made them worse. Now, as soon as I log in to the application, it freezes on activating the location, whether it is through facial recognition or logging in.	ar	update instead fix problems make bad soon log application freeze activate location whether facial recognition log	Negative	App Store	3/22/23 6:18	MeshalAlmutairi	3/22/23 6:18	تحديث جدا سيء				en	sa	1	1	1
App Store	Alinma-Bank	05a49b76-7549-410d-942f-6e78b6e8695f	"The world's most worst bank without any dispute goes to you."	ar	worlds bad bank without dispute go	Negative	App Store	3/18/23 17:47	AfrahAlhmdan	3/18/23 17:47	سيء جدًا				en	sa	1	0	0
App Store	Alinma-Bank	2d389826-686d-4bb0-9db8-5a2864c28c47	Very slow	ar	slow	Negative	App Store	3/17/23 23:29	Unknown2926	3/17/23 23:29	تطبيق غبي				en	sa	0	0	1
App Store	Alinma-Bank	ac5dd4d6-7c88-45b1-a994-51c4df05d5ec	Every time I try to login, the device tells me that it is not registered or that I have not registered it before. When I click okay, it takes me back to the login page again.	ar	every time try login device tell register register click okay take back login page	Negative	App Store	3/6/23 10:37	amik fa	3/6/23 10:37	التطبيق يرفض الدخول				en	sa	0	1	0
App Store	Alinma-Bank	7ccf5f2b-038e-437d-a129-20918e6ad0cb	The application is very bad, it doesn't have many services, most of the time it doesn't work, and if there were less than a star, I would rate it as such	ar	application bad doesnt many service time doesnt work less star would rate	Negative	App Store	3/5/23 6:46	fatimagh1983	3/5/23 6:46	التطبيق سيء جداً ، مافيه خدمات كثيرة ، أغلب الوقت مايشتغل ولو فيه أقل من نجمة حطيتها				en	sa	1	1	0
App Store	Alinma-Bank	fadf9f91-438a-4c9b-9c5e-e48522f70c36	There is a problem in the program, it hasn't been opening for two days since the latest update 1.7.7.	ar	problem program hasnt open two days since late update	Negative	App Store	3/2/23 17:00	Lol123خ	3/2/23 17:00	مشكله في البرنامج				en	sa	0	1	0
App Store	Alinma-Bank	30673083-bd62-4bd2-b675-3378b0456aee	The program has a problem, it allows me to open the website but then it freezes and doesn't open!!!	ar	program problem allow open website freeze doesnt open	Negative	App Store	2/28/23 0:02	بووجود	2/28/23 0:02	استفسار				en	sa	0	1	1
App Store	Alinma-Bank	1a75cb78-753e-4f3c-b6bd-a65895962aab	The latest update forced the website to be opened and it is a feature that is unnecessary since there is a code to use the application, as well as a code for financial transactions. Please disable the website feature and thank you.	ar	late update force website open feature unnecessary since code use application well code financial transactions please disable website feature thank	Negative	App Store	2/27/23 22:11	i5haled_	2/27/23 22:11	اخر تحديث فيه مشكله				en	sa	0	1	0
App Store	Alinma-Bank	aafc61d7-df49-4bb8-9967-dc032427bf6e	1- The application is no longer working with quick login, it needs activation for each operation. 2- The duration of the application's functionality cannot be modified. 3- It does not accept updating the email.	ar	application long work quick login need activation operation duration applications functionality modify accept update email	Negative	App Store	2/27/23 14:58	ماجد م ر	2/27/23 14:58	انخفضت الجودة فبراير 2023				en	sa	0	1	0
App Store	Alinma-Bank	15b84958-9a3e-4dd8-b7ef-c4f76570d6b9	The recent operations are not accurate, sometimes nothing comes out and sometimes something comes out. And now, nothing is coming out at all.	ar	recent operations accurate sometimes nothing come sometimes something come nothing come	Negative	App Store	2/27/23 2:03	saudashs	2/27/23 2:03	اسوأ تطبيق بنك				en	sa	1	1	1
App Store	Alinma-Bank	54772b25-1373-49c1-87d1-e0349ed2e01b	Bad bank, they have a lot of problems. Transfers take a long time and only arrive after days or get returned to the account. Customer service is terrible, each employee does whatever they want. I regret transferring my money to them and I want to withdraw it.	ar	bad bank lot problems transfer take long time arrive days get return account customer service terrible employee whatever want regret transfer money want withdraw	Negative	App Store	2/26/23 9:32	bdshsuj	2/26/23 9:32	Very bad				en	sa	1	1	1
App Store	Alinma-Bank	9ce001e1-e177-4d36-98f7-cf0f804b189d	There are very obvious and serious mistakes, please fix them for God's sake. Every time I try to open an account, it says my ID has expired and it doesn't log me out of the application if I log in from my device for three days. I have been trying to open an account for three days now and I can't, and the reason is your update.	ar	obvious serious mistake please fix gods sake every time try open account say id expire doesnt log application log device three days try open account three days cant reason update	Negative	App Store	2/19/23 18:53	hottie0.dragon	2/19/23 18:53	ً				en	sa	1	1	0
App Store	Alinma-Bank	56485b3a-6432-49f9-a451-b56e8a5503eb	The digital account is not working.	ar	digital account work	Negative	App Store	2/14/23 13:13	اللي ما يقدر يحول اللغة عربي	2/14/23 13:13	الحساب الرقمي لا يعمل				en	sa	0	1	0
App Store	Alinma-Bank	db8f213d-3765-4ba0-a78f-f3dce0a222ee	After the latest update, there are several problems: - It is necessary for the website to be active. - Quick login is not working. And others.	ar	late update several problems necessary website active quick login work others	Negative	App Store	2/10/23 20:04	alawi ahmed	2/10/23 20:04	مشاكل بالتطبيق				en	sa	0	1	0
App Store	Alinma-Bank	226fe887-4602-43ea-93be-5717c354dcfb	Frequent malfunctions and frequent requests for password reset. A bad and impractical application altogether.	ar	frequent malfunction frequent request password reset bad impractical application altogether	Negative	App Store	2/7/23 11:36	Noura1212334	2/7/23 11:36	كثير الأعطال وكثير ما يطلب استعادة كلمة السر. تطبيق سيء وغير عملي ابدا.				en	sa	1	1	0
App Store	Alinma-Bank	8a50d442-bbc2-43e3-bcfb-0f0dc9599203	You have a major problem with quick access. The access is completely refused with this service, even if it is canceled and registered again.	ar	major problem quick access access completely refuse service even cancel register	Negative	App Store	1/29/23 13:23	سعد_القرنے〆	1/29/23 13:23	مشكلة في الدخول السريع				en	sa	0	1	0
App Store	Alinma-Bank	441e1311-6697-4ad3-a51d-dfb47f6c19ee	It's freezing on me and not letting me log in.	ar	freeze let log	Negative	App Store	1/25/23 3:13	Ahazazii	1/25/23 3:13	تطبيق الانماء				en	sa	0	0	1
App Store	Alinma-Bank	2a899b48-d046-4159-b13b-ddc3440ed2bf	"It has become very laggy and annoying, I can't enter it."	ar	become laggy annoy cant enter	Negative	App Store	1/21/23 11:36	we1j	1/21/23 11:36	مشكله				en	sa	1	1	1
App Store	Alinma-Bank	eb606909-28b6-4622-b013-da821f89e604	Every time I try to log in quickly or using fingerprint, it doesn't work!! Fix it!	ar	every time try log quickly use fingerprint doesnt work fix	Negative	App Store	1/11/23 21:59	HanamKhan	1/11/23 21:59	تسجيل الدخول السريع وبالبصمة ما بيشتغل				en	sa	0	1	0
App Store	Alinma-Bank	fec9bfab-7497-4b6d-a9ad-6614f2be2746	Several times it does not allow entry except by deleting the application and reinstalling it again. Is the fault in the application or in the iPhone?	ar	several time allow entry except delete application reinstall fault application iphone	Negative	App Store	1/6/23 10:15	يوسف علي العمري	1/6/23 10:15	استفسار				en	sa	0	1	0
App Store	Alinma-Bank	e8412fb5-f0db-4f26-9a62-d8b357ef998c	Thank you for the worst banking experience in human history. Officially, we are closing your account and please review your conduct with your customers. ðð¼	ar	thank bad bank experience human history officially close account please review conduct customers	Negative	App Store	12/28/22 5:36	Sido1x	12/28/22 5:36	👎🏼				en	sa	1	0	0
App Store	Alinma-Bank	b9ee277c-509f-4123-9054-52e36f590dac	The new update has a big problem. It doesn't allow reaching the activation code, and it doesn't complete the transaction.	ar	new update big problem doesnt allow reach activation code doesnt complete transaction	Negative	App Store	12/19/22 4:39	حميد القاضي	12/19/22 4:39	الرياض				en	sa	0	1	0
App Store	Alinma-Bank	e185a878-0ea6-4213-847b-1f2705165784	When writing in the conversion memo field, it does not support the Arabic language. Considering this issue is not possible because for conversion, we need to write the reason for the conversion in the memo field.	ar	write conversion memo field support arabic language consider issue possible conversion need write reason conversion memo field	Negative	App Store	12/14/22 15:29	عيد ناصر	12/14/22 15:29	الكتابة				en	sa	0	1	0
App Store	Alinma-Bank	7b7acac5-6e93-452f-bf24-0f34c227b6c8	The application has been closed for two days.	ar	application close two days	Negative	App Store	12/9/22 16:24	Reelamo	12/9/22 16:24	مايفتح				en	sa	0	1	0
App Store	Alinma-Bank	b1075e86-8d71-4a67-997a-02289b8f1bf5	The application is frustrating, every time I try to log in, it says error!! Even though the information is correct and the quick login service and face recognition do not work.	ar	application frustrate every time try log say error even though information correct quick login service face recognition work	Negative	App Store	12/5/22 9:11	Bdooriii	12/5/22 9:11	😡				en	sa	1	1	0
App Store	Alinma-Bank	bbe6107e-3c7b-420c-96ab-4a00ba7c8da4	The application is not working outside the Kingdom after the latest update. I always receive a message saying that I need to close the virtual private network (VPN) in order to use the application, but I don't have a VPN. Even in the browser, I receive an error message with the number E002965. You must solve this problem quickly because how can a person traveling manage their account if we cannot…	ar	application work outside kingdom late update always receive message say need close virtual private network vpn order use application dont vpn even browser receive error message number e must solve problem quickly person travel manage account log	Negative	App Store	11/29/22 17:10	Xmx77	11/29/22 17:10	لايعمل خارج المملكة				en	sa	0	1	0
App Store	Alinma-Bank	b63a02f6-5968-49f8-a775-b98ea05ca000	Our car has become very heavy and very bad.	ar	car become heavy bad	Negative	App Store	11/28/22 10:56	almaleka2	11/28/22 10:56	صار سيء جدا				en	sa	1	0	1
App Store	Alinma-Bank	818bd6ea-e681-4818-a2b4-debdab936a98	Your electronic services are sometimes primitive. After updating the application, it asks for device registration through a connection, but when registering, there is no linking and loginðð¼ðð¼ðð¼ðð¼ðð¼ðð¼ðð¼ðð¼ðð¼ðð¼ðð¼ðð¼ðð¼ðð¼ðð¼ðð¼ðð¼ðð¼	ar	electronic service sometimes primitive update application ask device registration connection register link login	Negative	App Store	11/26/22 12:25	fahd282	11/26/22 12:25	سيء 👎🏼👎🏼				en	sa	1	1	0
App Store	Alinma-Bank	4f11fd83-3687-46b1-ba97-a157a58111b3	It seems that Alinma Bank is gradually losing its credibility and belonging... It used to be the best and most advanced...	ar	seem alinma bank gradually lose credibility belong use best advance	Negative	App Store	11/17/22 4:29	الصمّت الصاااارخ	11/17/22 4:29	كان اول !!				en	sa	1	0	0
App Store	Alinma-Bank	59a6c0f5-a85f-47b9-bd46-42b936436914	Their latest update is the worst, the worst it could be, causing my affairs to be disrupted since yesterday morning until now. I am unable to access my account, it keeps asking me for device identification, and my device has been recognized by the application for a long time. So, what is the solution? It is completely unacceptable from you. What kind of poor service is this?	ar	late update bad bad could cause affairs disrupt since yesterday morning unable access account keep ask device identification device recognize application long time solution completely unacceptable kind poor service	Negative	App Store	11/9/22 23:59	m,kjiop	11/9/22 23:59	صفر خدمة				en	sa	1	1	0
App Store	Alinma-Bank	21469bb5-be53-4a25-b010-6e299d39fde3	The calculations do not appear in order!! It means that you can see an old operation appearing at the top of the page!!!! Please, I kindly request the relevant management at Alinma Bank to fix this issue. Thank you.	ar	calculations appear order mean see old operation appear top page please kindly request relevant management alinma bank fix issue thank	Negative	App Store	11/6/22 6:34	Highlander Monk	11/6/22 6:34	مشكلة في ترتيب عمليات الحساب				en	sa	0	1	0
App Store	Alinma-Bank	ad4a1d71-7161-479f-bbb5-890e3dea5801	Every time I try to enter, it says "Dear partner, please try again later". Better than yesterday, but I still couldn't manage my account from yesterday until today.	ar	every time try enter say dear partner please try late good yesterday still couldnt manage account yesterday today	Negative	App Store	10/31/22 6:07	Riiiiiiiiiiiiiiiiiiiim	10/31/22 6:07	سيئ				en	sa	0	1	0
App Store	Alinma-Bank	476ce7ab-d3c6-4cc3-9a60-0ed548f32733	"Some of the worst banks are the ones that make simple transfers complicated. All banks have the same complexity."	ar	bad bank ones make simple transfer complicate bank complexity	Negative	App Store	10/27/22 17:02	hussainhamad	10/27/22 17:02	🤮				en	sa	1	1	0
App Store	Alinma-Bank	0701eaa5-6f81-46e7-925f-0ab237e8712e	He says opening an account is possible from the age of 15 to 18, and I'm 18 years old and I can't open one, they want me to visit the bank. ð¤¦ââï¸ð¤¦ââï¸	ar	say open account possible age im years old cant open one want visit bank	Negative	App Store	10/25/22 10:02	ferasalanzy	10/25/22 10:02	تطبيق مو عاجبني				en	sa	0	1	0
App Store	Alinma-Bank	bf78f153-8690-46be-97cc-e716abb360fd	It has been very very bad for me, I have been visiting the branch for two months to cancel my credit card, but until now the card has not been canceled and the amount has been deducted from my account despite not using the credit card. All the required amount has been paid.	ar	bad visit branch two months cancel credit card card cancel amount deduct account despite use credit card require amount pay	Negative	App Store	10/25/22 6:25	أثيل	10/25/22 6:25	سيئ جدًا جدا ًجداً جدأ				en	sa	1	1	0
App Store	Alinma-Bank	4a439791-7745-4c8c-bc01-63df5e1862fc	Limited services submit a finance application no one will contact you.	ar	limit service submit finance application one contact	Negative	App Store	10/19/22 19:20	Ayasmari	10/19/22 19:20	سيئ				en	sa	1	0	0
App Store	Alinma-Bank	235f12c0-75a5-4f42-ab0b-860883fa5f0a	A bad application that carries the name of a bank that does not accept adding credit like UrPay or STC Pay. I contacted the bank regarding the online purchasing service, but nobody has a solution to the problem. It has been over a month and I am still trying.	ar	bad application carry name bank accept add credit like urpay stc pay contact bank regard online purchase service nobody solution problem month still try	Negative	App Store	10/17/22 22:48	yousif.borakan	10/17/22 22:48	عدم قبول اضافة رصيد لعدة محافظ مثل urpay/ stcpay				en	sa	1	1	0
App Store	Alinma-Bank	4834aebe-7b5c-4cfc-9093-b0d8c5ba9bca	The application is decent, but it needs more arrangement for the most frequently used icons. Also, there is always a recurring problem that prevents you from performing any actions on your account, and the reason is a malfunction in the application. I hope it can be developed with a better layout and solve the problems that cause our lives to be disrupted for days, forcing us to use our accounts …	ar	application decent need arrangement frequently use icons also always recur problem prevent perform action account reason malfunction application hope develop good layout solve problems cause live disrupt days force us use account bank	Negative	App Store	10/14/22 17:20	Reemsamih2030	10/14/22 17:20	تجربتي مع ابلكيشن تطبيق الانماء				en	sa	1	1	0
App Store	Alinma-Bank	6bb54bfd-b4bc-4140-b944-9a40c17432ee	I have been trying to buy something online for an hour. It keeps telling me that I have to log out of the application, but I haven't even logged in in the first place! I'm so angry, I want to slap you all.	ar	try buy something online hour keep tell log application havent even log first place im angry want slap	Negative	App Store	10/10/22 21:00	Btol	10/10/22 21:00	يااسوء تطبيق بالعالم				en	sa	1	0	0
App Store	Alinma-Bank	5ebb8e6d-87f3-4a39-8711-2d1bfc7f6cc9	Why is there still no business application?????	ar	still business application	Negative	App Store	10/3/22 7:55	Faisal6665	10/3/22 7:55	سيئ				en	sa	1	1	0
App Store	Alinma-Bank	e0e30393-8ba1-42a8-98ce-6a3643962a16	The conversion service is bad and complicated.	ar	conversion service bad complicate	Negative	App Store	9/29/22 15:11	alshranih	9/29/22 15:11	ابها				en	sa	1	0	0
App Store	Alinma-Bank	b68180ab-61b8-401e-ae37-e2f2fddbc506	Advice from a loving person: Stay away from Alinma Bank, it is unbelievably bad.	ar	advice love person stay away alinma bank unbelievably bad	Negative	App Store	9/29/22 7:55	Abu-aljood	9/29/22 7:55	المدينة المنورة				en	sa	1	0	0
App Store	Alinma-Bank	4ca3f96e-9234-4947-8c85-63d9f8526014	The new update is so so so slow.. Please solve the problem as soon as possible.	ar	new update slow please solve problem soon possible	Negative	App Store	9/27/22 10:53	Thiago.313	9/27/22 10:53	تقييم				en	sa	0	1	1
App Store	Alinma-Bank	bcad606b-1ab0-416f-a938-e2053b64a78e	I have not received my credit card since September 9, 2022, and I do not have a tracking number.	ar	receive credit card since september track number	Negative	App Store	9/24/22 22:48	بودن	9/24/22 22:48	شركة النقل التي توصل البطاقات بطيئة				en	sa	0	1	0
App Store	Alinma-Bank	1861ce83-8684-4eaa-add3-e5cc5fce865a	The application on my mobile has a problem, especially when I try to log in it doesn't open. It's been like this for a few days and there hasn't been any update regarding this issue.	ar	application mobile problem especially try log doesnt open like days hasnt update regard issue	Negative	App Store	9/21/22 7:50	ahmed99909	9/21/22 7:50	Problem				en	sa	0	1	0
App Store	Alinma-Bank	daf60244-0fa3-4df4-9636-d186a9c26646	I have a problem with the application. It is stuck on the application interface for more than a week, despite updating the application. The website is also stuck on the login page, showing a black screen.	ar	problem application stick application interface week despite update application website also stick login page show black screen	Negative	App Store	9/18/22 23:39	yallow A	9/18/22 23:39	مشكله بالتطبيق والموقع				en	sa	0	1	1
App Store	Alinma-Bank	6e51471c-daf7-4ebd-93d4-8a98aa050e8e	Hello, with the new update, no confirmation number has been accepted for verification. Additionally, the options for reversing the speech are also incorrect. Please make the necessary adjustments quickly.	ar	hello new update confirmation number accept verification additionally options reverse speech also incorrect please make necessary adjustments quickly	Negative	App Store	9/18/22 12:42	mem2019	9/18/22 12:42	مشكله				en	sa	1	1	1
App Store	Alinma-Bank	4f1bae28-cb29-4f81-890b-f6b9df6ecb92	The deposit machine is often out of order, and also the automated card printing machine. Al Aziziya branch.	ar	deposit machine often order also automate card print machine al aziziya branch	Negative	App Store	9/15/22 10:44	hamid.a.o.b	9/15/22 10:44	خدمة سيئة				en	sa	0	1	0
App Store	Alinma-Bank	27b653b2-4bd5-42d5-b776-6d11681c3953	The application is very slow. The verification message arrives late, taking more than 5 minutes. It would be preferable if the service could be improved. It should be noted that the online website is also slow.	ar	application slow verification message arrive late take minutes would preferable service could improve note online website also slow	Negative	App Store	9/12/22 21:48	عبدالحي محمد	9/12/22 21:48	عبدالحي				en	sa	1	0	1
App Store	Alinma-Bank	2fbc729a-2b36-4c87-9287-3f1ffaa49ecc	The writing is poor and smudges when used, especially the numbers.	ar	write poor smudge use especially number	Negative	App Store	9/12/22 4:59	74390	9/12/22 4:59	بطاقة مدى				en	sa	1	0	0
App Store	Alinma-Bank	9b4789bf-87bb-4c36-8018-c8a03ed23dd1	There is a slowness in the execution of some operations.	ar	slowness execution operations	Negative	App Store	9/9/22 16:08	SULTAN ALHUMID	9/9/22 16:08	يحتاجون الى سرعة التفيذ				en	sa	0	0	1
App Store	Alinma-Bank	24e60403-380e-42b5-8d62-302f29fabd0f	If you open the application, you cannot make a payment until you sign out. Why is it that after 30 seconds, the program does not return and you automatically log out and close it?	ar	open application make payment sign second program return automatically log close	Negative	App Store	9/1/22 15:18	rr11rx	9/1/22 15:18	خلل فالدفع بالابل بي الي هي عن طريق الجوال				en	sa	0	1	0
App Store	Alinma-Bank	472b576e-32fc-43b5-be64-96d3819438f2	The worst login verification application fails due to technical reasons. You need to delete the application and reinstall it. Additionally, there is a problem with adding a beneficiary for another bank. Its description is prolonged and its suffering is explained.	ar	bad login verification application fail due technical reason need delete application reinstall additionally problem add beneficiary another bank description prolong suffer explain	Negative	App Store	8/30/22 9:51	AAZZ5000	8/30/22 9:51	أسوء تطبيق				en	sa	1	1	0
App Store	Alinma-Bank	4676c2e4-f7da-4bf1-a5a8-62b27b2f1db9	The system is not good. In case of entering the application and then exiting it for a period, there is a problem with not being able to retrieve.	ar	system good case enter application exit period problem able retrieve	Negative	App Store	8/30/22 3:13	محمد مليحي	8/30/22 3:13	النظام				en	sa	0	1	0
App Store	Alinma-Bank	44002371-3bdd-48f5-b292-0fd0b3d5102e	Hello, Please cancel the service. The transaction for card ***** has been declined due to the timing of the transaction coinciding with your login time on one of the bank's electronic channels. Please log out and try again later. As it hinders the use of the ATM card in commercial stores.	ar	hello please cancel service transaction card decline due time transaction coincide login time one bank electronic channel please log try late hind use atm card commercial store	Negative	App Store	8/27/22 16:14	ولمازا	8/27/22 16:14	👎🏻				en	sa	0	1	0
App Store	Alinma-Bank	ab0f5b73-5fdc-4262-a845-00dce1a3e897	I always get stuck, I have to delete it and then download it again.	ar	always get stick delete download	Negative	App Store	8/24/22 16:34	arwa alghannam	8/24/22 16:34	سيء				en	sa	0	0	1
App Store	Alinma-Bank	755496bb-6ae1-4a39-94bd-9001a7c726aa	The application is bad, I deposit my money and it doesn't come back.	ar	application bad deposit money doesnt come back	Negative	App Store	8/17/22 5:58	عـبيد	8/17/22 5:58	اسوء بنك				en	sa	1	1	0
App Store	Alinma-Bank	47604d5b-0177-449e-9cd0-0184b14dce5c	Unfortunately, both the application and the bank are not functioning properly. There are problems with the program and catastrophic problems in the bank's account protection. Unfortunately, it used to be the best among banks when it first opened, but now its condition is lamentable. The application and the bank have become very bad. I do not recommend dealing with them. ðð¼	ar	unfortunately application bank function properly problems program catastrophic problems bank account protection unfortunately use best among bank first open condition lamentable application bank become bad recommend deal	Negative	App Store	7/28/22 15:58	Md's🕶	7/28/22 15:58	بنك الانماء الى الاسوء للاسف				en	sa	1	1	0
App Store	Alinma-Bank	2550f17a-c427-4801-9627-874ea9906d05	Bad application. Transfers are irregular and messages don't arrive immediately when you send or receive a transfer.	ar	bad application transfer irregular message dont arrive immediately send receive transfer	Negative	App Store	7/25/22 6:47	first time , need to take time	7/25/22 6:47	Ap				en	sa	1	1	1
App Store	Alinma-Bank	8a07bf1a-212a-4477-8c2d-35bf48040f50	It is very bad in every sense of the word and does not deserve a star.	ar	bad every sense word deserve star	Negative	App Store	7/21/22 14:33	ابو فـهد	7/21/22 14:33	سيى جداً				en	sa	1	0	0
App Store	Alinma-Bank	a9c9d55f-2da4-496d-9e93-04f3ae892ae0	My only problem is that I cannot log in quickly with my iPhone XS Max	ar	problem log quickly iphone xs max	Negative	App Store	7/7/22 17:20	أبو انس محمد	7/7/22 17:20	Dammam				en	sa	0	1	0
App Store	Alinma-Bank	7e0916d2-f9b4-4a17-b31a-5a45a8addb3a	The worst application and the worst bank.	ar	bad application bad bank	Negative	App Store	7/4/22 9:45	🌧🌧🌧🌧🌧🌧🌧🌧🌧	7/4/22 9:45	سيء جدا				en	sa	1	0	0
App Store	Alinma-Bank	0d1656fa-30fb-42fd-b43a-2c0ab9ea8f2a	The application is nice, but there is one bad point in it when entering and exiting the application, it takes time for me to be able to withdraw from the ATM. It says the transaction has been declined due to the timing of the transaction coinciding with the time of your login registration in one of the bank's electronic channels. Please log out and try again later. And the problem is that it show…	ar	application nice one bad point enter exit application take time able withdraw atm say transaction decline due time transaction coincide time login registration one bank electronic channel please log try late problem show log ago	Negative	App Store	7/4/22 7:35	اااااالااااااااا	7/4/22 7:35	مشكله بسيطه ارحو حلها				en	sa	1	1	1
App Store	Alinma-Bank	8c261687-ec53-466f-b6ba-87f02152455c	I pressed the star to rate, but the application keeps crashing. Every time I make a transfer, it tells me it failed. It's useless except for knowing your current balance.	ar	press star rate application keep crash every time make transfer tell fail useless except know current balance	Negative	App Store	6/27/22 10:37	sfaslamt	6/27/22 10:37	تطبيق ضعيف				en	sa	1	1	1
App Store	Alinma-Bank	b3d81cfd-4add-42c7-bb10-4b848fa2b79f	Why is there always a delay and every now and then I check if there is an update or not and it turns out there is no need for an update? What's the problem? It's frustrating.	ar	always delay every check update turn need update whats problem frustrate	Negative	App Store	6/26/22 11:27	ازفت تطبيق بالحياة	6/26/22 11:27	زفت دايم يعلق ويفشلني اذا بحول للناس				en	sa	1	0	1
App Store	Alinma-Bank	7c875cad-eaf9-4f2e-8f33-7fd4432b9cfb	The worst banking application in history.	ar	bad bank application history	Negative	App Store	6/15/22 6:44	Chumlucy	6/15/22 6:44	لا تنحدون على ذا البنك				en	sa	1	0	0
App Store	Alinma-Bank	8a8d1653-3287-4a0b-9068-55e46cc76364	Do not deal with Alinma Bank.	ar	deal alinma bank	Negative	App Store	6/10/22 15:05	احداثياته كذب	6/10/22 15:05	بنك معقد				en	sa	1	0	0
App Store	Alinma-Bank	b9a642c2-db69-4e3b-ab35-6399ac4570c3	He is always negative and never opens up at crucial times, putting me in difficult situations.	ar	always negative never open crucial time put difficult situations	Negative	App Store	6/2/22 20:59	غاده عبد العزيز	6/2/22 20:59	سئ جدا				en	sa	1	0	0
App Store	Alinma-Bank	0da03c7f-b724-4d48-a8b6-5bee65276435	After the latest update, it is not possible to write the purpose of the transfer in Arabic, along with its importance in preserving rights.	ar	late update possible write purpose transfer arabic along importance preserve right	Negative	App Store	6/1/22 13:43	ali wz	6/1/22 13:43	مشكلة عدم امكانية كتابة الغرض من التحويل بالعربي				en	sa	1	0	0
App Store	Alinma-Bank	0edf5ecc-9b7f-4b9c-9071-f097d14a2413	It's unreasonable that the card list has been stuck for two days. I want to get a new card, but it's not working! All banks operate through applications except Alinma Bank, it keeps getting stuck and has login problems all the time.	ar	unreasonable card list stick two days want get new card work bank operate applications except alinma bank keep get stick login problems time	Negative	App Store	5/26/22 23:30	kaitobtw	5/26/22 23:30	سيئ				en	sa	0	1	1
App Store	Alinma-Bank	af62ba3f-ad05-4f17-8664-70dc1c5a359d	It's strange that the program doesn't support writing a memorandum in Arabic letters!! Who was the program made for??	ar	strange program doesnt support write memorandum arabic letter program make	Negative	App Store	5/26/22 10:06	أبو محمد عمر	5/26/22 10:06	لغتنا العربية				en	sa	1	1	0
App Store	Alinma-Bank	0f591570-1881-4279-9c1d-736ecc62fb7e	There is a problem that I hope will be resolved. I have never encountered it with other banks. When logging in and verifying my account, I wanted to use Apple Pay, but I could only do so after an hour of logging in or if I wanted to withdraw from an ATM, I had to wait for no more than an hour. All other services are excellent except when requesting a credit card. Despite being a customer for 10 y…	ar	problem hope resolve never encounter bank log verify account want use apple pay could hour log want withdraw atm wait hour service excellent except request credit card despite customer years ask proof employment salary deposit bank	Negative	App Store	5/25/22 20:23	Alkasr51	5/25/22 20:23	مشكلة تسجيل الخروج				en	sa	0	1	0
App Store	Alinma-Bank	c94f07cc-d6b8-4af2-8767-3f0174768eb1	Unfortunately, the application is very bad. It crashes a lot and doesn't open. Every time I have to go back and enter my username, even though I set a reminder for it. I hope they develop it.	ar	unfortunately application bad crash lot doesnt open every time go back enter username even though set reminder hope develop	Negative	App Store	5/24/22 14:31	سنبتتقر	5/24/22 14:31	تطبيق				en	sa	1	1	1
App Store	Alinma-Bank	b84db481-f5bf-4f3c-9264-b31a874067ff	"I enter my information, but it doesn't go through. It says the password is incorrect, but I am sure of it."	ar	enter information doesnt go say password incorrect sure	Negative	App Store	5/11/22 12:13	محمد عبسي غلام الحق	5/11/22 12:13	ض				en	sa	0	1	0
App Store	Alinma-Bank	869fd05b-478c-4184-8c46-1185b53769a4	International transfers with Western Union always take a long time, and most of the time the process is not completed. ð¤	ar	international transfer western union always take long time time process complete	Negative	App Store	5/4/22 17:31	bhbhbhbhbhbhbbhhbnjb	5/4/22 17:31	التطبيق سيء				en	sa	0	0	1
App Store	Alinma-Bank	8805925b-dfbf-40d2-81e0-9ea7042f82b1	The application freezes a lot, brother.	ar	application freeze lot brother	Negative	App Store	4/28/22 15:04	محمد الأركاني	4/28/22 15:04	التطبيق يعلق				en	sa	0	0	1
App Store	Alinma-Bank	5ade3f01-662e-47fa-9022-3c4d46c0fad7	He keeps suspending his mission and logging me out frequently, and sometimes he asks for a refresh. Poor development.	ar	keep suspend mission log frequently sometimes ask refresh poor development	Negative	App Store	4/27/22 2:28	وطفأ	4/27/22 2:28	سئ				en	sa	0	1	1
App Store	Alinma-Bank	2454fcf5-dbaa-4717-81e2-8fe12ce10a77	The latest update, dated approximately 25/4/2022, is very bad and causing slowness and freezing in the application.	ar	late update date approximately bad cause slowness freeze application	Negative	App Store	4/27/22 4:09	aalbosi	4/27/22 4:09	مشكله بالحديث الاخير				en	sa	1	0	1
App Store	Alinma-Bank	38f89a7d-a991-4d87-95e7-7aedfefd1f86	The latest update caused the application to malfunction and it is no longer opening.	ar	late update cause application malfunction long open	Negative	App Store	4/27/22 2:31	Tinalil99	4/27/22 2:31	سيء				en	sa	0	1	0
App Store	Alinma-Bank	e65e06ed-0ddd-4daf-b172-9f5801b80a82	The application has become very bad after the latest update, due to the excessive comments and my inability to log out or perform any other operation except after closing the application and reopening it again.	ar	application become bad late update due excessive comment inability log perform operation except close application reopen	Negative	App Store	4/27/22 1:19	Nooooooody555	4/27/22 1:19	التحديث الجديد 👎🏻👎🏻				en	sa	1	1	0
App Store	Alinma-Bank	ee171dae-feb2-4ec0-bd07-1c515c403ba5	There are days when I need the application and find it locked for maintenance. I want to know how many times it undergoes maintenance in a month. You have tired us, learn from the Al Rajhi Bank application.	ar	days need application find lock maintenance want know many time undergo maintenance month tire us learn al rajhi bank application	Negative	App Store	4/26/22 23:33	mohammed056070	4/26/22 23:33	صيانة				en	sa	1	1	0
App Store	Alinma-Bank	adcb5c99-0d0a-4b42-a2e6-01dcefb1ecff	The application doesn't want to open, it says "an update has occurred" and the same message still appears.	ar	application doesnt want open say update occur message still appear	Negative	App Store	4/26/22 19:05	nl101nl	4/26/22 19:05	التطبيق مو راضي يفتح				en	sa	0	1	0
App Store	Alinma-Bank	8bc675a5-72ad-43a6-8276-aedeff12cdcf	I have a remark, why do they delay in responding when it is a matter of international concern and I want to correct it, and they refer me to the news now.	ar	remark delay respond matter international concern want correct refer news	Negative	App Store	4/17/22 22:05	يا حبيبي يا رسول الله	4/17/22 22:05	عندي ملاحظه ليه				en	sa	0	0	1
App Store	Alinma-Bank	d6641425-f0fd-486a-8a2e-8dd8b2c66f6d	Please open another branch in Tabuk city because we are suffering from overcrowding at the main branch due to its small size and lack of employees.	ar	please open another branch tabuk city suffer overcrowd main branch due small size lack employees	Negative	App Store	4/6/22 23:33	Afaf Salami	4/6/22 23:33	سكان تبوك يستحقون				en	sa	1	0	0
App Store	Alinma-Bank	3cc1a9ae-33df-459e-ac79-7eef9253231a	There is a problem with Western Union transfers, when they reach the final step they are not executed. I hope this error is addressed.	ar	problem western union transfer reach final step execute hope error address	Negative	App Store	4/5/22 23:30	Al hazmi Arar	4/5/22 23:30	ويسترن يونيون				en	sa	0	1	0
App Store	Alinma-Bank	89a6185b-155c-413b-a351-d83c3e1735cb	"I tried many times to login, but it didn't work. I got exhausted. When I enter my username and password, after that, as soon as the Home page appears, it redirects me back to the user page. Also, the quick login didn't work for me."	ar	try many time login didnt work get exhaust enter username password soon home page appear redirect back user page also quick login didnt work	Negative	App Store	3/14/22 22:20	hhwvshsysudu	3/14/22 22:20	عطل في الدخول				en	sa	0	1	0
App Store	Alinma-Bank	8653b9b9-e0fa-47bd-b3b8-9f6150d219fc	In the beginning, their customer service and speed of delivery were beyond description. Now, as their client base has grown, their services have become extremely poor, especially their self-service options. I hope you will consider providing better services to your customers so that you do not lose them.	ar	begin customer service speed delivery beyond description client base grow service become extremely poor especially selfservice options hope consider provide good service customers lose	Negative	App Store	3/6/22 9:33	aagsh4	3/6/22 9:33	سيء للغاية				en	sa	1	0	0
App Store	Alinma-Bank	cb1647ff-6401-4d1c-a236-756534e6df41	Dear friends, Alinma Bank is one of the best banks, and it deserves five stars for its quality. However, you have been overwhelming us with constant updates in the Alinma Bank application! The App Store should give them a break. It is supposed to be one update per month so that it doesn't inconvenience us.	ar	dear friends alinma bank one best bank deserve five star quality however overwhelm us constant update alinma bank application app store give break suppose one update per month doesnt inconvenience us	Negative	App Store	2/10/22 17:12	Faisal..400	2/10/22 17:12	اقول ترى اشغلتونا بالتحديث				en	sa	1	0	0
App Store	Alinma-Bank	568f813d-9387-4f6b-8649-bfa24463295e	I wish you would take a look at Al Rajhi's application. There is a huge difference between their application and yours, as if we are in the year 2005 with a single design since the day the bank was established.	ar	wish would take look al rajhis application huge difference application year single design since day bank establish	Negative	App Store	2/3/22 21:17	سامي 65	2/3/22 21:17	اقتراح				en	sa	1	0	0
App Store	Alinma-Bank	b3578685-e103-4809-9f19-3c7a079a5d58	It's really frustrating, every time I try to change my information it keeps telling me there's an error, even though I'm sure they're correct. And until now, it hasn't been resolved for me.	ar	really frustrate every time try change information keep tell theres error even though im sure theyre correct hasnt resolve	Negative	App Store	1/27/22 21:55	shmokhha	1/27/22 21:55	خاااييسسسس				en	sa	1	1	0
App Store	Alinma-Bank	34fc5127-13d2-48dd-8825-04df3607d4fb	The application is very bad. I have been unable to log in for a whole day.	ar	application bad unable log whole day	Negative	App Store	1/27/22 11:55	mr.heema	1/27/22 11:55	التطبيق جداً سئ يوم كامل لا يتم تسجيل دخول				en	sa	1	1	0
App Store	Alinma-Bank	bfabc3b6-4b8e-4e6e-b51d-208bc0f19200	Sometimes it gets stuck.	ar	sometimes get stick	Negative	App Store	1/9/22 22:20	saibane	1/9/22 22:20	😢				en	sa	0	0	1
App Store	Alinma-Bank	475857d7-09ab-447e-ad74-c518cf4e20ef	The worst banking application I have ever used in my life :)!	ar	bad bank application ever use life	Negative	App Store	1/5/22 7:20	ASHA100000000000000000000000M	1/5/22 7:20	:)				en	sa	1	0	0
App Store	Alinma-Bank	d84b2c6f-fb8f-4817-8199-ca9c44724bcb	Everything the fingerprint and quick login did is suddenly canceled!!!!!!!!!!!!!!!!!!!!!!!!!!	ar	everything fingerprint quick login suddenly cancel	Negative	App Store	7/30/23 9:47	بدر خال	7/30/23 9:47	تطبيق سيء كل ما كل ما فعلت البصمة والدخول السريع يلغيه فجأه !!!!!!!!!!!!!!!!!!!!!!!!!!				en	sa	0	1	0
App Store	Alinma-Bank	948cb424-1d8c-4e31-b924-afcbd7a28d63	This update is asking me to allow access to the geographic location!! This is a violation of privacy if I allow it at all. I want to use your services without accessing my location. Guys, really? You updated the app but still require geo location??? Despite all the complaints? I can't wait for you to stop invading my privacy and be able to download the app again and use it. I'll keep an eye out. …	ar	update ask allow access geographic location violation privacy allow want use service without access location guy really update app still require geo location despite complaints cant wait stop invade privacy able download app use ill keep eye third update still require enable geographic location use application completely unacceptable want check balance allow access geographic location	Negative	App Store	3/30/23 7:06	AsmaAZ	3/30/23 7:06	مستمرين في - اختراق خصوصية الموقع الجغرافي				en	us	1	1	0
App Store	Alinma-Bank	30ec2cc5-0abd-4c13-9b01-a98f6fc3b383	Random updates for the app are not reasonable. The app is updated every week!! Guys, we're really tired of these updates. Find a solution for yourselves.	ar	random update app reasonable app update every week guy really tire update find solution	Negative	App Store	3/22/23 7:01	Saad004858473627849409494	3/22/23 7:01	التطبيق مزعج جدا				en	us	1	0	0
App Store	Alinma-Bank	d7c7653e-ac8f-4c38-87bb-a2bfcf5afcee	The app was good until it started violating users' privacy by forcing them to grant access to their locations!! Perhaps the app management should reconsider this mechanism. Until then, I will stop using the app. Thank you.	ar	app good start violate users privacy force grant access locations perhaps app management reconsider mechanism stop use app thank	Negative	App Store	3/6/23 15:00	Nadooosh01	3/6/23 15:00	د. عبدالرحمن				en	us	1	1	0
App Store	Alinma-Bank	be86c895-298d-4bc8-a61d-227aea39baaa	Unfortunately, you cannot enter the account without activating the website!	ar	unfortunately enter account without activate website	Negative	App Store	2/28/23 17:37	Khaled990657	2/28/23 17:37	يطلب السماح باستخدام الموقع				en	us	0	1	0
App Store	Alinma-Bank	83a1aada-e589-4439-9d4a-2bc37b600cf3	The application is a maze until you reach what you want, and now it requires location activation to work!!! A clear invasion of privacy, personally, I have stopped using it.	ar	application maze reach want require location activation work clear invasion privacy personally stop use	Negative	App Store	2/20/23 17:34	Abo Naif	2/20/23 17:34	متاهة				en	us	1	0	0
App Store	Alinma-Bank	8493b73b-69be-457a-86c8-dd18a3b671c0	Hello, After updating the application, I am unable to access my account without allowing location permission. Note that the device has been authenticated, and the username, password, and one-time OTP access code are being used to login. This feature is unnecessary, as one can access the account through a computer browser without being forced to specify the location, considering that computers do …	ar	hello update application unable access account without allow location permission note device authenticate username password onetime otp access code use login feature unnecessary one access account computer browser without force specify location consider computers global position system kindly request feature disable immediately	Negative	App Store	2/18/23 8:12	عميل مصرفية خاصة	2/18/23 8:12	فضلاً عدم إجبار العميل على السماح بتحديد الموقع				en	us	1	1	0
App Store	Alinma-Bank	58edb25b-b356-42a9-880d-34e2ea0a8275	The user should not be obligated to allow sharing the website.	ar	user obligate allow share website	Negative	App Store	9/4/23 14:55	A.Y.SH	9/4/23 14:55	يشترك مشاركة الموقع				en	us	1	1	0
App Store	Alinma-Bank	e090c59a-23f1-43f5-a691-2be2e7e50885	One of the most unsuccessful applications, slow, and I recommend changing the bank.	ar	one unsuccessful applications slow recommend change bank	Negative	App Store	8/27/23 17:49	خر ى عليكم	8/27/23 17:49	لايستحق التحميل				en	us	1	0	1
App Store	Alinma-Bank	65f92ab3-9c99-464e-b4c5-fd02264fd0bd	The application is amazing, but you don't want to go to the branches ð the system is always down ð¶ð»ââï¸	ar	application amaze dont want go branch system always	Negative	App Store	5/8/23 13:20	sosa.oreo	5/8/23 13:20	ً				en	us	1	0	0
App Store	Alinma-Bank	639ca8b1-8399-407b-9d81-4acc0f8d8fd8	Privacy breach + login complexity + error in quick login + fingerprint not accepted and error also appeared.	ar	privacy breach login complexity error quick login fingerprint accept error also appear	Negative	App Store	4/18/23 4:31	azoz_saleh	4/18/23 4:31	سيء				en	us	0	1	0
App Store	Alinma-Bank	bdfabd52-917a-463e-89b7-54751d5b80ba	Your application hangs a lot, I hope for improvement.	ar	application hang lot hope improvement	Negative	App Store	4/2/23 11:05	برانامج راااائع جدا يستاهل 5⭐️	4/2/23 11:05	تطبيقكم يعلق كثيرا اتمنى التحسين				en	us	1	0	1
App Store	Alinma-Bank	2f7570d7-0dce-441d-8456-608cbef0d201	The notification message for withdrawal or transfer has been delayed, and this is very inconvenient for the customer. May Allah reward you with goodness.	ar	notification message withdrawal transfer delay inconvenient customer may allah reward goodness	Negative	App Store	3/30/23 4:00	ام عمار المكية	3/30/23 4:00	ملاحظة عدم قبول كلمة المرور دون بيان السبب				en	us	1	0	1
App Store	Alinma-Bank	72f87331-136a-42b3-a933-6c3bdf12f327	Hello, What happened to me is that I wanted to transfer an urgent amount of money through an exchange, but they told me that it was late. The next day, I went and the employee told me to use the online application. They said the transfer would be faster. But now, when I added the beneficiary, it says it will take 24 hours to process the transfer.	ar	hello happen want transfer urgent amount money exchange tell late next day go employee tell use online application say transfer would fast add beneficiary say take hours process transfer	Negative	App Store	3/18/23 15:26	Hymo666	3/18/23 15:26	ليه الموضف يقولك كلام غلط				en	us	0	1	0
App Store	Alinma-Bank	47c583d0-f3fc-402c-89b1-66541f5e694d	There is no termination service available.	ar	termination service available	Negative	App Store	2/9/23 10:47	abutorkie	2/9/23 10:47	سيء جداً				en	us	0	1	0
App Store	Alinma-Bank	c1409251-987e-4e7e-83b8-c14dce84f3c9	There are errors in the months that haven't been resolved, like when you try to recharge your travel card and it says there is insufficient credit! Well, I'm trying to recharge, not spend! And completing the password from Safari is not supported... It's not fair, I have to use an easily memorable password just because the application doesn't support password completion! And sometimes you get erro…	ar	errors months havent resolve like try recharge travel card say insufficient credit well im try recharge spend complete password safari support fair use easily memorable password application doesnt support password completion sometimes get errors without number contact say receive error number see bank switch nettiv hibrid applications application still webbased	Negative	App Store	12/2/22 9:59	Hizabr	12/2/22 9:59	البنك جيد .. لكن التطبيق اممم				en	us	0	1	0
App Store	Alinma-Bank	e969c0e5-9473-4c41-864f-270b97e6f374	Unfortunately, this application is very bad. All banking applications have advanced significantly, but this application has not improved in over 6 years. It does not open outside of Saudi Arabia and it is always freezing.	ar	unfortunately application bad bank applications advance significantly application improve years open outside saudi arabia always freeze	Negative	App Store	11/10/22 13:38	fahadtalal	11/10/22 13:38	مع الاسف				en	us	1	0	1
App Store	Alinma-Bank	1fe0dbef-0e96-4cf4-93cc-43139c9c6050	There is a problem with activating Face ID and quick login together. When opening the application, it gets stuck on the bank logo and the logo keeps spinning (loading) without opening the application.	ar	problem activate face id quick login together open application get stick bank logo logo keep spin load without open application	Negative	App Store	9/29/22 10:43	محمد العوض	9/29/22 10:43	أرجوا إصلاح بعض المشاكل في البرنامج				en	us	0	1	1
App Store	Alinma-Bank	24a08a2d-b767-43ba-928d-a456010fd5f4	The program freezes with every operation after the latest update.	ar	program freeze every operation late update	Negative	App Store	9/25/22 14:11	SoSgg	9/25/22 14:11	البرنامج يعلق في كل عملية.				en	us	0	0	1
App Store	Alinma-Bank	278e9fde-1958-4241-ac0f-6bde6f81afa1	With the update and the special pictures for National Day 92, The application now crashes when entering the username. It does not work at all.	ar	update special picture national day application crash enter username work	Negative	App Store	9/20/22 3:18	ابو محمد وعمر وانس	9/20/22 3:18	خلل إغلاق التطبيق فجأة				en	us	0	1	1
App Store	Alinma-Bank	a6ac61b1-a2d8-4f58-b731-dff326fe761e	The application made me sick. I want to order from Amazon, and the balance is sufficient and more. I tried to place the order 20 times, and each time it was rejected due to the bank. Until now, it is still rejected. I decided to close my account on the same day I opened it.	ar	application make sick want order amazon balance sufficient try place order time time reject due bank still reject decide close account day open	Negative	App Store	8/20/22 17:44	9afix	8/20/22 17:44	يجيب الموض				en	us	1	1	0
App Store	Alinma-Bank	79c1dd54-0de7-41e1-bcf7-0e65ce48c39d	The application needs to be reviewed and updated in many aspects to keep up with other banks' applications. There is an issue with topping up the balance when executing the transaction; the activation code is received in a message, but an error icon appears indicating an issue with the username. This is a problem with the application.	ar	application need review update many aspects keep bank applications issue top balance execute transaction activation code receive message error icon appear indicate issue username problem application	Negative	App Store	8/7/22 22:14	khalid-977	8/7/22 22:14	مشكلة في التطبيق				en	us	0	1	0
App Store	Alinma-Bank	623139e7-eb7d-488d-aaed-e4e48077cbd6	Excellent, but the downside is that it messes up on the 27th or 26th of each month when salaries are due. It either deletes bills or doesn't open at all. This observation is not a monthly issue but rather frustrating.	ar	excellent downside mess th th month salaries due either delete bill doesnt open observation monthly issue rather frustrate	Negative	App Store	7/31/22 12:20	Vixspe	7/31/22 12:20	Review				en	us	1	1	0
App Store	Alinma-Bank	92ae9073-962d-4ff9-80b1-c433c8ed9131	The application C doesn't open a bank account for me.	ar	application c doesnt open bank account	Negative	App Store	7/31/22 0:49	albhfcvhh	7/31/22 0:49	اسوا بنك				en	us	0	1	0
App Store	Alinma-Bank	b7c33bf4-ae40-4d64-a276-d551dfa4813b	I have not been working on transfer operations since a long time after the evening prayer.	ar	work transfer operations since long time even prayer	Negative	App Store	7/27/22 22:56	Abdullah@448	7/27/22 22:56	لايتم التحويل				en	us	0	1	0
App Store	Alinma-Bank	39893e86-4203-4bec-8801-3ad7446fccb0	I hope you can find a solution for us regarding the issue that occurred during the operation due to the overlap of the operation time with your login time... etc. Unfortunately, even after I exit the application by clicking on the logout button, I have to wait for a long time for it to consider that I have left and accept the purchase. This is a problem that forces me to stop at the store for a w…	ar	hope find solution us regard issue occur operation due overlap operation time login time etc unfortunately even exit application click logout button wait long time consider leave accept purchase problem force stop store hope find solution	Negative	App Store	7/9/22 23:20	Abdulazizw	7/9/22 23:20	نبي الحل لهالمشكله				en	us	1	1	0
App Store	Alinma-Bank	40b0bac9-863d-400f-9024-6c5e6e7bad50	The application is not clear, we need glasses.	ar	application clear need glass	Negative	App Store	6/1/22 18:32	ماجد عيد	6/1/22 18:32	التطبيق مو واضح كتابه صغيره يبي نظارة				en	us	1	0	0
App Store	Alinma-Bank	ef21c54e-9437-4a91-8edb-69731e6d41dd	By Allah, the application is bad. I hope the bank employees see their work well.	ar	allah application bad hope bank employees see work well	Negative	App Store	5/9/22 11:36	نحن عبدالعزيز بن علي	5/9/22 11:36	Very poor app				en	us	1	0	0
App Store	Alinma-Bank	7883bbe8-aeb9-419a-ba32-6c4de23cf6df	Every time I try to enter, the application freezes and does not open the account.	ar	every time try enter application freeze open account	Negative	App Store	4/27/22 2:05	عبداالرحمن	4/27/22 2:05	سيء				en	us	0	1	1
App Store	Alinma-Bank	ddfb3596-af3e-493e-98ee-fde45d9ef971	Bad, bad, bad in every sense of the word. It's extremely slow, and just when I updated it, it doesn't work when I try to log in again and it tells me to update again. I hope you make it better. Also, make it user-friendly. For example, Al Rajhi bank allows you to copy the IBAN number from anywhere and paste it in the field, but with Al Inma bank, I have to manually type it in full.	ar	bad bad bad every sense word extremely slow update doesnt work try log tell update hope make good also make userfriendly example al rajhi bank allow copy iban number anywhere paste field al inma bank manually type full	Negative	App Store	4/24/22 4:53	Ra-123	4/24/22 4:53	الانماء				en	us	1	1	1
App Store	Alinma-Bank	a605f6b0-09bd-42fe-843f-292fca9dcb8e	I am very tired because I entered the IBAN number twice, once intentionally to activate the beneficiary and once when making the transfer.	ar	tire enter iban number twice intentionally activate beneficiary make transfer	Negative	App Store	3/30/22 14:19	توفي علي	3/30/22 14:19	عملية اصافة المستفيد				en	us	0	1	0
App Store	Alinma-Bank	643b709c-7a49-4cbe-b089-db7b7af6bfa6	Perhaps changing the background color is available. The writing is faint and difficult to read.	ar	perhaps change background color available write faint difficult read	Negative	App Store	2/15/22 13:37	اب و م ح م د	2/15/22 13:37	الخلفية باهتة				en	us	1	0	0
App Store	Alinma-Bank	f5a58076-0713-46e2-908e-646f2534e826	The latest update is very bad, it does not save the password. I have to enter it every time.	ar	late update bad save password enter every time	Negative	App Store	2/7/22 19:30	اس٢٣	2/7/22 19:30	اس٢٤				en	us	1	1	0
App Store	Alinma-Bank	df8b11cd-c786-43ed-b0d4-8663f8db91ab	That is a step too far.	en	step far	Negative	App Store	2/5/23 8:54	nassoor9	2/5/23 8:54	Why ask for location?				en	ca	1	0	0
App Store	Alinma-Bank	b28a851f-6d18-4890-ab8f-e93b2550ae3c	Last night was some problems	en	last night problems	Negative	App Store	1/9/23 14:30	Momin khan,M	1/9/23 14:30	Inma				en	gb	0	1	0
App Store	Alinma-Bank	d960ba78-5eda-4c3e-8e1e-ee68eaee355a	I am very disappointed about fingerprint and mpin I remove my fingerprint by mistake now I wanna set again fingerprint print but when bank calling me and I pressed 1 he said to me sorry you are not in online banking and call was disconnected and I cnt set Mpin also please fix this problm	en	disappoint fingerprint mpin remove fingerprint mistake wan na set fingerprint print bank call press say sorry online bank call disconnect cnt set mpin also please fix problm	Negative	App Store	1/22/23 0:17	Problems 🖕🏻	1/22/23 0:17	Fingerprint and Mpin				en	in	0	1	0
App Store	Alinma-Bank	735c8a84-5ee4-4eea-b6c3-9657fdec0b7b	I had try many times to open new bank account but Alinma bank not accepting national address please find out exactly issue	en	try many time open new bank account alinma bank accept national address please find exactly issue	Negative	App Store	5/2/23 12:50	SAYYED.99	5/2/23 12:50	New user registration problem online portal not accepting national address				en	in	0	1	0
App Store	Alinma-Bank	504f3676-0d24-467f-8dd1-e5d1ee4e7507	They definitely added unnecessary features that have one solution only and cause plenty of issues! All the devices are considered new and there isn't a way to authorize them unless waiting for 24 hours! How am I supposed to do anything if all my devices can't access the services! However, implementing this feature without considering any of this is definitely an idiot	en	definitely add unnecessary feature one solution cause plenty issue devices consider new isnt way authorize unless wait hours suppose anything devices cant access service however implement feature without consider definitely idiot	Negative	App Store	9/2/23 18:18	Renad.L	9/2/23 18:18	Problems!				en	my	1	1	0
App Store	Alinma-Bank	0d74c4d4-4a30-46f4-8d7f-153ce912326e	Worst app , validation to add beneficially is worst of all .	en	bad app validation add beneficially bad	Negative	App Store	2/2/22 17:22	aliakhtar49	2/2/22 17:22	Worst App				en	pk	1	0	0
App Store	Alinma-Bank	a4844ed2-0e5f-4640-973d-4155326c642a	Had a bad experience while applying for a personal loan. The request status is not updated on app and request tracking is very difficult. Every time need to call customer care for status check. Once Request is raised cannot be cancelled using this app. Service needs to be made more transparent and time bound to save both parties time. Since two weeks my request is under process.	en	bad experience apply personal loan request status update app request track difficult every time need call customer care status check request raise cancel use app service need make transparent time bind save party time since two weeks request process	Negative	App Store	2/27/23 17:35	M.Y. Pasha	2/27/23 17:35	Personal Loan request				en	sa	1	1	0
App Store	Alinma-Bank	44ebade3-b574-45b8-9c40-9e5e9494af10	Dear team I am facing a lot of issues facing mobile banking since last update forcing me to stop using the service. Please address this quickly	en	dear team face lot issue face mobile bank since last update force stop use service please address quickly	Negative	App Store	4/27/22 12:46	Abdul.haleem	4/27/22 12:46	Application Hanging and crashing				en	sa	0	1	0
App Store	Alinma-Bank	ba4769b0-ac5f-41e6-a0d7-1ba644a875cd	A lot of loading issues .the application is easy but sometimes it takes so much time for loading or bugâs	en	lot load issue application easy sometimes take much time load bug	Negative	App Store	2/27/23 12:45	titgcbbvh	2/27/23 12:45	Loading issues				en	sa	0	1	1
App Store	Alinma-Bank	48dab8c1-96ea-4a9d-a0cf-8facff80b00e	Opening a new bank account at the app is impossible! I type in my id then nafad page opens for absher then nafads app sends me a notification to approve the number I get ( absher login process) and then I get out of alinma app to nafad and finish approving when I get back to alinma bank nafad or absher page is gone and itâs never ending loop	en	open new bank account app impossible type id nafad page open absher nafads app send notification approve number get absher login process get alinma app nafad finish approve get back alinma bank nafad absher page go never end loop	Negative	App Store	1/4/23 13:43	AlaaCS	1/4/23 13:43	The most unpleasant experience				en	sa	0	1	0
App Store	Alinma-Bank	0040fca4-982b-4183-ae5d-2d6dc3c075c0	I am completely disappointed and astounded as to the fact that the app is now paid for as. Subscription for over 33 Sar yet it never opens even with the other app that claims to be newer. This should be worked on. This is the only bank app I have that never opens in record time. Completely disappointed	en	completely disappoint astound fact app pay subscription sar yet never open even app claim new work bank app never open record time completely disappoint	Negative	App Store	6/25/23 14:48	jenniferoluchi	6/25/23 14:48	Disappointment				en	sa	1	1	0
App Store	Alinma-Bank	7d3444cd-15f8-479e-9a7f-66bf1f125279	Iâm very disappointed with your service every time I try logging in it wonât work but sometimes it does !?? The user name and the password are correct .. also the customers service is garbage â¦ waste of time seriously! I will never use this bank again	en	im disappoint service every time try log wont work sometimes user name password correct also customers service garbage waste time seriously never use bank	Negative	App Store	9/28/22 6:29	Sosoksksslslslls	9/28/22 6:29	App log in issues and bad customers service				en	sa	1	1	1
App Store	Alinma-Bank	6edd39d7-fe69-4c80-8834-97497a9856ec	The app is good but when i make local transfer it asks for e-channel Password and i put everything i know still it shows invalid credentials.	en	app good make local transfer ask echannel password put everything know still show invalid credentials	Negative	App Store	8/20/22 14:02	aatika123	8/20/22 14:02	Very good app but				en	sa	1	1	0
App Store	Alinma-Bank	55f7fa64-edd3-4e0f-8711-e0d2dc4ea4a7	It used to be good app but from last three days it is logging me out immediately after login. I am outside of the country as a result I can only use desktop version. Please rectify.	en	use good app last three days log immediately login outside country result use desktop version please rectify	Negative	App Store	5/30/23 15:10	SRafiuddin	5/30/23 15:10	Log out				en	sa	1	1	0
App Store	Alinma-Bank	4f3c594a-8e1b-464f-8af6-0964d68c935f	The app wonât log me in asking for access to location even though I clicked on âAllowââ¦.it was a great app unfortunately	en	app wont log ask access location even though click allowit great app unfortunately	Negative	App Store	2/16/23 11:11	honeybisq	2/16/23 11:11	Location				en	sa	1	1	0
App Store	Alinma-Bank	46b278d2-6bbd-46f9-aa0e-7f5dbffcd0a2	Incoming funds transfer massage delay problem	en	incoming fund transfer massage delay problem	Negative	App Store	1/26/23 3:05	killerbeanRZ	1/26/23 3:05	Delay problem				en	sa	0	0	1
App Store	Alinma-Bank	f0ef53c1-f3a7-44df-9112-f1be93967f0a	Allow access to the location is the worst system why force the user to open locate. Cards always fail to work	en	allow access location bad system force user open locate card always fail work	Negative	App Store	3/11/23 18:58	oyan3588	3/11/23 18:58	Card problem and location problem				en	sa	1	1	0
App Store	Alinma-Bank	1cd95f4d-b66d-4049-834a-ea963c290da4	In every couple days, apps asks me to redo all steps to do fast log in. This becomes annoying and a setback.	en	every couple days apps ask redo step fast log become annoy setback	Negative	App Store	4/2/22 15:03	Deterrence	4/2/22 15:03	Continuing fast log in problem				en	sa	1	0	0
App Store	Alinma-Bank	4a38a43a-4f87-4d94-b887-2b20ff198bdc	There is an annoying bug in the bill payment.	en	annoy bug bill payment	Negative	App Store	3/8/22 19:13	mr.aseeri85	3/8/22 19:13	Minor bug				en	sa	1	1	0
App Store	Alinma-Bank	9bbb8239-6dff-4f9b-a212-1dd1eb8b33df	The application is a bit slow comparing with other applications	en	application bite slow compare applications	Negative	App Store	8/3/22 11:10	olfat22	8/3/22 11:10	To improve				en	sa	0	0	1
App Store	Alinma-Bank	4ee3aacf-c6e6-444f-aca7-01781cbc7a72	This app was good enough until it started requiring me to share my location every time I opened the app. This is an invasion of privacy and completely unacceptable.	en	app good enough start require share location every time open app invasion privacy completely unacceptable	Negative	App Store	4/20/23 4:11	xJames7	4/20/23 4:11	Requires location access for no reason				en	sa	1	0	0
App Store	Alinma-Bank	852ecbca-7283-4c6b-a6ee-8e6525c54451	Iam Apple user ios 16 quick login not working properly every time showing wrong and also face id showing wrong. Now i updated apps	en	iam apple user ios quick login work properly every time show wrong also face id show wrong update apps	Negative	App Store	10/25/22 19:06	jsksmmzmmzmsmksz	10/25/22 19:06	Quick login				en	sa	0	1	0
App Store	Alinma-Bank	06657127-6337-4b94-94ad-d74e7416b4fc	After signing in, the app is crashing immediately and kick me out again. I updated, then deleted and installed again but still not working!	en	sign app crash immediately kick update delete instal still work	Negative	App Store	4/29/23 2:07	Rm77.	4/29/23 2:07	App is not working				en	sa	0	1	0
App Store	Alinma-Bank	c22d2893-4f2a-430a-970e-3ff9f28de7f3	App not so user friendly	en	app user friendly	Negative	App Store	1/1/22 11:42	almorished	1/1/22 11:42	Not so user friendly				en	sa	0	0	0
App Store	Alinma-Bank	80ba140a-5ba1-476c-9289-fdff22b6457a	I have tried to register several times, and in the end I am asked to complete the nationality, which does not exist in the first place	en	try register several time end ask complete nationality exist first place	Negative	App Store	4/1/23 3:20	mmouayad	4/1/23 3:20	After the trouble of entering information				en	sa	0	1	0
App Store	Alinma-Bank	843dcde7-3f29-485c-8407-2a885e063321	Frontend looks modern but the backend is horrible. Keep getting internal error exception every time i login to the app. I canât even view or use akthr points due to these bugs	en	frontend look modern backend horrible keep get internal error exception every time login app cant even view use akthr point due bug	Negative	App Store	7/15/23 14:44	nono336699	7/15/23 14:44	Full of bugs				en	sa	1	1	0
App Store	Alinma-Bank	6af6b0eb-daa7-48d1-be79-d58639131173	The new (colours change only) website and the app are so terrible and buggy. Unfortunately as a owner and partner for Alinma I feel sorry, every bank inside K.S.A is moving forward with Technology and banking solutions with modern era tools.	en	new colour change website app terrible buggy unfortunately owner partner alinma feel sorry every bank inside ksa move forward technology bank solutions modern era tool	Negative	App Store	11/8/22 16:23	Saud AlSahli	11/8/22 16:23	To CTO				en	sa	1	0	1
App Store	Alinma-Bank	0d80db7b-b3aa-4557-9ee8-a0a1155adadc	I am currently in india and unfortunately not able to login, app gives error to switch off VPN but the VPN is not on.	en	currently india unfortunately able login app give error switch vpn vpn	Negative	App Store	11/27/22 18:45	mudassar m d	11/27/22 18:45	Unable to login outside KSA				en	sa	0	1	0
App Store	Alinma-Bank	896fa94a-93db-46d0-afb3-56772b822a77	The WORST app I have ever used ! This app wouldnât even let me create an account. It keeps showing âalinma id is not correct it should be 11 digitâ what the heck does that even mean	en	bad app ever use app wouldnt even let create account keep show alinma id correct digit heck even mean	Negative	App Store	3/4/23 15:14	qwiuiwiuiiiw	3/4/23 15:14	App is buggy				en	sa	1	1	0
App Store	Alinma-Bank	34b8eca0-d1af-482a-a77a-4ddf413758f8	just have some lagging during when i open the card list it says âtry again laterâ	en	lag open card list say try late	Negative	App Store	6/22/23 8:12	SulimanAo	6/22/23 8:12	nice				en	sa	0	1	1
App Store	Alinma-Bank	b337fcb1-42e7-4f26-be6e-50ca4dc997a7	After the latest update I canât open my app in my home country, itâs showing message to turn off vpn ðð	en	late update cant open app home country show message turn vpn	Negative	App Store	12/2/22 20:14	imran1111111111000000//////	12/2/22 20:14	App not working				en	sa	0	1	0
App Store	Alinma-Bank	11470258-f00b-468b-9fdf-388b46affad1	Why I had to open location every time!?	en	open location every time	Negative	App Store	2/8/23 17:48	fvjjxsfvxhkvxgjbc	2/8/23 17:48	Why location?				en	sa	0	1	0
App Store	Alinma-Bank	ae19f9e3-dc8e-4815-a8ac-753280fad6c9	I canât open a new account and I canât get a card	en	cant open new account cant get card	Negative	App Store	2/28/22 16:34	shosho hotel	2/28/22 16:34	Disappointed				en	sa	0	1	0
App Store	Alinma-Bank	7e6a1636-a0c0-49e2-b5d2-66fbcaab6190	Donât update the app itâs not working, soo stiff it keeps loading and crashing please fix it	en	dont update app work soo stiff keep load crash please fix	Negative	App Store	4/13/23 5:24	9765321278	4/13/23 5:24	Not working				en	sa	1	1	1
App Store	Alinma-Bank	a5c4ce09-1ca9-471b-897a-1f95e3e92ba8	Alinma in 2023 still has problems with app support	en	alinma still problems app support	Negative	App Store	3/29/23 21:16	مشكورين ويعطيكم العافية	3/29/23 21:16	Technical problem				en	sa	0	1	0
App Store	Alinma-Bank	824d6259-fefc-49be-a4c6-58671d7a96bc	not working 24 hours, bugs and lagging the worse saudi bank customers service	en	work hours bug lag bad saudi bank customers service	Negative	App Store	4/27/22 2:11	josex190	4/27/22 2:11	the worse apps ever				en	sa	1	1	0
App Store	Alinma-Bank	66b2d803-255b-4d2d-b6b3-d01bc7647846	The worst app Iâve ever seen in the financial industry	en	bad app ive ever see financial industry	Negative	App Store	11/15/22 13:13	Dayeel10	11/15/22 13:13	The app design				en	sa	1	0	0
App Store	Alinma-Bank	6022930e-962a-4944-a0a4-68df3fe28f6f	Why i cannot sign in my account.. it is always appearing that invalid username or password..i already reset my password and no improvement	en	sign account always appear invalid username passwordi already reset password improvement	Negative	App Store	9/1/23 19:18	jolenyana	9/1/23 19:18	Sign in problem				en	sa	0	1	0
App Store	Alinma-Bank	dbbc7347-766e-4f20-b7bc-15caa8e353fa	MPIN code showing 1 to 6 number only fix this issue please	en	mpin code show number fix issue please	Negative	App Store	4/3/23 8:43	kawal awid	4/3/23 8:43	MPIN code				en	sa	0	1	0
App Store	Alinma-Bank	daa8b6fe-a649-4e80-928f-b5b3c635b899	Some time itâs not accepting transfer or payment after adding the code	en	time accept transfer payment add code	Negative	App Store	1/4/23 6:04	Only u for ever	1/4/23 6:04	System failure				en	sa	0	1	0
App Store	Alinma-Bank	7b9f2e00-2db9-4549-b2be-1c4876a8874b	The app is better than any other competitor, but it looks lime they peaked and now theyâre actively trying to make it worse. First, disabling access to whomever using a VPN which is a SECURITY measure. Now, theyâre completely preventing us from using the app if we donât share location. I know the countryâs privacy policies are never in favor of the citizens, but that doesnât mean youâ…	en	app good competitor look lime peak theyre actively try make bad first disable access whomever use vpn security measure theyre completely prevent us use app dont share location know countrys privacy policies never favor citizens doesnt mean youll implement completely unnecessary measure everything especially bank stuff typical food delivery app gate bank ill stop use app completely try use browser…	Negative	App Store	7/22/23 23:55	cenema_love	7/22/23 23:55	Complete invasion of privacy				en	us	1	1	0
App Store	Alinma-Bank	3cf92091-27c9-4b94-ad06-05d1b83b7200	First, it forces me to open the location service when thereâs no need to use it. Second, it doesnât give you the chance to switch between two languages when writing a note for any transaction, just English language, what about others non-speakers? Third, this App contains a lot of inside services, but most of them canât be done within it, you have to visit specific branches to do them, then…	en	first force open location service theres need use second doesnt give chance switch two languages write note transaction english language others nonspeakers third app contain lot inside service cant do within visit specific branch include since useless forth app become slow slow every time update hope consider point try fix point accord date	Negative	App Store	1/31/23 12:14	Hammoodii	1/31/23 12:14	Every update is getting worse				en	us	1	1	1
App Store	Alinma-Bank	bb797fda-3513-4bc5-9f7d-b2c1f3b6be9b	Please improve the support for password managers. When logging in, the Alinma online domain is not associated with the app which makes it difficult for password managers to figure out the password to use. Workarounds will affect the security which include copying the password to the clipboard or enforce the user to use a common simpler password.	en	please improve support password managers log alinma online domain associate app make difficult password managers figure password use workarounds affect security include copy password clipboard enforce user use common simple password	Negative	App Store	10/1/22 8:16	mhalshehri	10/1/22 8:16	Support for password managers				en	us	1	1	0
App Store	Alinma-Bank	17543049-3f8f-4dee-86a8-096b2ad8c804	Only giving 1 star because the app requires access to my location in order to use the app. Other bank applications do not ask for that. You're supposed to value your customersâ privacy. Do better	en	give star app require access location order use app bank applications ask youre suppose value customers privacy good	Negative	App Store	8/18/23 15:11	feras_alh	8/18/23 15:11	Why are you requesting my location				en	us	1	0	0
App Store	Alinma-Bank	e6ad19b8-530f-4a8c-8651-ce5c81525862	Still insists on enabling location services. When using the website there are no location services, so saying itâs for security is a lie. Privacy intrusion. Garbage.	en	still insist enable location service use website location service say security lie privacy intrusion garbage	Negative	App Store	4/10/23 3:31	RX-001	4/10/23 3:31	Very bad				en	us	1	0	0
App Store	Alinma-Bank	e0dab9ab-b919-4bd7-8e49-882461e85c96	Laggy and slow and now it wants to know my location yay!	en	laggy slow want know location yay	Negative	App Store	2/7/23 22:08	Jugofwaterlo	2/7/23 22:08	Getting worse with every update				en	us	0	0	1
App Store	Alinma-Bank	a6c73672-06af-41e4-be1f-b2941548f699	The app keeps telling you canât login turn off vpn , and I donât have a vpn , I donât use it. This problem should be solved ASAP	en	app keep tell cant login turn vpn dont vpn dont use problem solve asap	Negative	App Store	12/9/22 18:59	sawsan ahm	12/9/22 18:59	App error				en	us	0	1	0
App Store	Alinma-Bank	f6d3af89-8afb-4ac1-9c90-a1cb61a71723	A very very bad experience, if I could turn back time I would open an account with any other bank	und	bad experience could turn back time would open account bank	Negative	App Store	6/24/22 22:58	kaaz11	6/24/22 22:58	تجربة سيئة جداً جداً ولو عادلي الزمن فتحت حساب عند اي بنك آخر				en	us	1	0	0
App Store	Alinma-Bank	d997249b-c222-4a95-9f07-b3387ef1d5e5	A summit in cooperation from all the employees at the bank branch on Palestine Street, Al Rahab, Jeddah.	ar	summit cooperation employees bank branch palestine street al rahab jeddah	Neutral	App Store	3/21/22 11:27	mostdent	3/21/22 11:27	منتهي التعاون				en	eg	0	1	0
App Store	Alinma-Bank	36c77b59-e19f-4b52-b6ed-f57b71a92e08	The bank forces customers to provide the exact location to access and benefit from the application. This shows how much the bank respects the privacy of its customers and affects the public relationship between the bank and the "partner". The exact location may be requested for high or frequent transactions, but sometimes we need to access our account, view invoices, review some transactions and …	ar	bank force customers provide exact location access benefit application show much bank respect privacy customers affect public relationship bank partner exact location may request high frequent transactions sometimes need access account view invoice review transactions transfer provide exact location matter immeasurable audacity	Neutral	App Store	6/21/23 11:00	Yshj 4	6/21/23 11:00	تزويد التطبيق بالموقع إجباري=وقاحة👎🏻				en	sa	1	1	0
App Store	Alinma-Bank	cc2425a0-8eb6-4cfe-92e6-24c1e7b44bfd	The location is mandatory ðð»	ar	location mandatory	Neutral	App Store	6/17/23 11:22	Traveler321	6/17/23 11:22	الموقع إجباري 👎🏻				en	sa	1	0	0
App Store	Alinma-Bank	7349e039-e232-4f9f-8179-6990f2f9c62f	In the latest update, it requests the activation of the website.	ar	late update request activation website	Neutral	App Store	2/9/23 5:20	Khfhggjgvvv1260	2/9/23 5:20	سيء				en	sa	0	1	0
App Store	Alinma-Bank	eacfe189-3014-4cf3-af7a-9e1faf529fff	My ID card needs to be renewed.	ar	id card need renew	Neutral	App Store	9/2/23 10:07	محمد بن صالح ابو صالح	9/2/23 10:07	شكل بطاقة مدي يحتاج تجديد				en	sa	0	1	0
App Store	Alinma-Bank	c681cb0b-1c77-441c-9668-9afcf9c84207	And this is what makes me leave the bank and go to Al Rajhi.	ar	make leave bank go al rajhi	Neutral	App Store	8/10/23 6:23	الشيخ السلطان	8/10/23 6:23	بنك رائع ووميز لكن رسوم التحويل زايده عن البنوك الاخرى				en	sa	1	0	0
App Store	Alinma-Bank	16b92fb2-0107-470c-b24b-a3b4d7e57148	The application contains all the required services but it needs some improvements in the appearance of menus to be attractive and clear to the user.	ar	application contain require service need improvements appearance menus attractive clear user	Neutral	App Store	7/29/23 12:30	Yazidofaiz	7/29/23 12:30	تحسين التطبيق				en	sa	1	0	0
App Store	Alinma-Bank	3d10979f-eca4-4f76-adb8-8a254b20472a	The bank has two applications, which one is better to use? ð¤	ar	bank two applications one good use	Neutral	App Store	7/19/23 11:37	S3ud1381	7/19/23 11:37	سلام				en	sa	0	0	0
App Store	Alinma-Bank	1c53ca2b-8bce-49dd-b2e4-fccd93972eac	Okay	ar	okay	Neutral	App Store	6/25/23 16:52	Ahmed055555	6/25/23 16:52	روعه٥				en	sa	0	0	0
App Store	Alinma-Bank	689f18db-e8c7-48a8-a39e-4c62d7d0877b	The best bank for application services. You are missing the addition of a service to lock the savings account for multiple accounts.	ar	best bank application service miss addition service lock savings account multiple account	Neutral	App Store	6/14/23 17:27	abu yassr	6/14/23 17:27	افضل بنك				en	sa	1	1	0
App Store	Alinma-Bank	6402f7d7-d0d0-4ee7-993c-ecc4a6e4404a	Dear partner, please try again later.	ar	dear partner please try late	Neutral	App Store	6/1/23 12:52	سبلايم	6/1/23 12:52	كثرة تعثر فتح تطبيق الانماء				en	sa	1	0	0
App Store	Alinma-Bank	b04dfecd-a423-4dfb-94af-4d1af43ebae1	A distinguished bank and I advise citizens to deal with it.	ar	distinguish bank advise citizens deal	Neutral	App Store	5/7/23 1:22	ابوعبدالله القاسمي	5/7/23 1:22	افضل مصرف				en	sa	1	0	0
App Store	Alinma-Bank	1d581a2b-c920-47fe-a96d-01b48af9bcf0	The bank launched â¥ï¸.	ar	bank launch	Neutral	App Store	4/25/23 18:13	sazksa	4/25/23 18:13	saz				en	sa	1	0	0
App Store	Alinma-Bank	96b64fc4-1fee-4979-baa8-0cf92ca6a70c	Zaq application	ar	zaq application	Neutral	App Store	4/23/23 22:50	يمسخشهضهشهنشنش	4/23/23 22:50	زق تطبيق وزق برناج				en	sa	1	1	0
App Store	Alinma-Bank	a1cd2676-ce2c-4319-8249-0ffa36b11405	Your location should be requested, as long as the device is authenticated, there is no need to request the location.	ar	location request long device authenticate need request location	Neutral	App Store	4/19/23 9:57	متابع للبرامج	4/19/23 9:57	ملقوف				en	sa	0	1	0
App Store	Alinma-Bank	e49f8723-f250-46dc-adcd-3f9007f5c89b	The application logs me out instead of logging me in as soon as I enter the mobile code.	ar	application log instead log soon enter mobile code	Neutral	App Store	4/10/23 13:15	To7ntos	4/10/23 13:15	تطبيق سيء يحتاج تطوير				en	sa	0	1	0
App Store	Alinma-Bank	67c12448-5429-48b2-b4cf-b6ffe5da3791	The only bank that has light clay.	ar	bank light clay	Neutral	App Store	4/8/23 11:57	Bedour1402	4/8/23 11:57	تعليق				en	sa	1	0	0
App Store	Alinma-Bank	3b78803a-38f5-4734-ac8f-a5a54acdd155	Banking transactions appear on the account very late.	ar	bank transactions appear account late	Neutral	App Store	3/1/23 17:16	حسنعع	3/1/23 17:16	تعليق				en	sa	0	1	0
App Store	Alinma-Bank	fdab6d4c-c28d-410e-bc81-f6cfdd4aab2b	Special bank	ar	special bank	Neutral	App Store	2/8/23 3:05	سرالن	2/8/23 3:05	مكة الزاهر				en	sa	0	0	0
App Store	Alinma-Bank	489cb339-e6d8-47d8-98ca-19e710dc1334	Why don't you activate quick login and make it easier for us?	ar	dont activate quick login make easy us	Neutral	App Store	2/4/23 5:42	الشريف ضياء	2/4/23 5:42	تحسين				en	sa	0	1	0
App Store	Alinma-Bank	02e61273-6a18-4d61-9298-3a79353f3ff2	It would be preferable if the name of the new person added appears, if they are not a customer of Alinma Bank, when entering their IBAN to ensure the accuracy of the account before transferring.	ar	would preferable name new person add appear customer alinma bank enter iban ensure accuracy account transfer	Neutral	App Store	1/23/23 11:19	نوال صالح محمد	1/23/23 11:19	عنيزه / القصيم				en	sa	1	1	0
App Store	Alinma-Bank	021bc4d8-221e-4feb-8b5f-37b70f3bac32	I asked the management to transfer the amount from the sale of stocks to the current account within less than 3 working days.	ar	ask management transfer amount sale stock current account within less work days	Neutral	App Store	1/20/23 10:46	ابومشعل الهدهود	1/20/23 10:46	الاسهم				en	sa	0	1	0
App Store	Alinma-Bank	fb5c4b87-be3d-47b4-bfb4-e25d1877acd1	Oh, how much he/she hangs out!	ar	oh much heshe hang	Neutral	App Store	1/17/23 11:53	maaltasa	1/17/23 11:53	سيئ				en	sa	0	0	1
App Store	Alinma-Bank	300d08b8-f1d1-472a-a038-17b7307688b2	Sometimes the facial recognition login feature does not appear.	ar	sometimes facial recognition login feature appear	Neutral	App Store	1/12/23 4:15	abusultan2030	1/12/23 4:15	التطبيق				en	sa	0	1	0
App Store	Alinma-Bank	3b24c9e3-7c55-4037-befa-fe8adce8757a	A very normal bank and I hope it merges with another bank.	ar	normal bank hope merge another bank	Neutral	App Store	1/2/23 2:29	ابو علي عبدالله	1/2/23 2:29	مصرف تقليدي				en	sa	1	0	0
App Store	Alinma-Bank	e0e64dda-71da-4fbe-b784-ec480c831215	Having an online store in the application would be better for customer service.	ar	online store application would good customer service	Neutral	App Store	12/29/22 5:11	ندتاانخنزدزاذيلع	12/29/22 5:11	طلب				en	sa	0	0	0
App Store	Alinma-Bank	7397193c-3d99-4b61-9f2c-85a4b535e9e5	Refusal to accept certain accounts from local banks.	ar	refusal accept certain account local bank	Neutral	App Store	12/27/22 6:15	pppposh	12/27/22 6:15	مشكلة				en	sa	0	1	0
App Store	Alinma-Bank	01de2839-697a-4729-9fcd-5631809744c3	distinguished bank	ar	distinguish bank	Neutral	App Store	12/21/22 15:47	ابو تسته	12/21/22 15:47	المجمعه				en	sa	1	0	0
App Store	Alinma-Bank	f0756ca8-cb2a-40b6-bd29-50a71ad92654	The application does not provide an overall picture in one screen of what is available in the main and sub-accounts.	ar	application provide overall picture one screen available main subaccounts	Neutral	App Store	12/17/22 5:10	جزاكم الله خير،،،تطبيق رائع	12/17/22 5:10	إضافة				en	sa	1	1	0
App Store	Alinma-Bank	a969c2b8-f312-4a68-bb68-1706a150f050	Regarding proving indebtedness.	ar	regard prove indebtedness	Neutral	App Store	12/15/22 15:44	Ab silem	12/15/22 15:44	الرياض فرع التخصصي				en	sa	1	0	0
App Store	Alinma-Bank	93335eb9-2f23-4fdf-b61b-4317ae0ff6e2	Whenever I activate the quick login feature, it gets saved, but when I log in again, a message appears stating that the feature was not saved.	ar	whenever activate quick login feature get save log message appear state feature save	Neutral	App Store	12/15/22 17:37	Solimano44	12/15/22 17:37	خاصية الدخول السريع				en	sa	0	1	0
App Store	Alinma-Bank	71c0d99b-a873-4c84-b595-6acd379be918	They still have the card deactivation service available in the application.	ar	still card deactivation service available application	Neutral	App Store	12/13/22 2:35	المد	12/13/22 2:35	شكرًا الإنماء				en	sa	0	1	0
App Store	Alinma-Bank	5a26f039-3757-4b3b-b45a-d00f0ab81f9a	The visa was free, and then fees were imposed on it.	ar	visa free fee impose	Neutral	App Store	12/6/22 6:14	ماجد متضرر من الراجحي	12/6/22 6:14	سحبت راتبي منه				en	sa	0	1	0
App Store	Alinma-Bank	2a558d03-3f35-4e1e-8094-96a397ed8ed5	Distinctive	ar	distinctive	Neutral	App Store	11/24/22 21:04	عزوزي1990	11/24/22 21:04	مميز				en	sa	1	0	0
App Store	Alinma-Bank	33256c4d-4391-4685-adfb-83bdbd30f7e4	The exchange rate is higher than the market.	ar	exchange rate high market	Neutral	App Store	11/10/22 21:17	Alshgdli	11/10/22 21:17	Alshgdli				en	sa	1	0	0
App Store	Alinma-Bank	6cf60113-be1b-4987-936f-eff7da178b9e	Smoothness and precision in dealing without visiting any branch.	ar	smoothness precision deal without visit branch	Neutral	App Store	10/13/22 5:41	جميل لا يوصف بكلمة	10/13/22 5:41	احسن تطبيق مصرفي				en	sa	1	0	0
App Store	Alinma-Bank	d0bb7f98-581c-40ab-8b73-bffd10d8cb00	An application that is trustworthy â­ï¸â­ï¸â­ï¸â­ï¸â­ï¸.	ar	application trustworthy	Neutral	App Store	10/10/22 2:09	ali💛💙	10/10/22 2:09	hafrawi				en	sa	0	0	0
App Store	Alinma-Bank	cb014ac3-2328-4c67-a187-5c69df8c2535	You need to download two or more programs in order to open an account. Why the complication when you can send me the code to my phone?	ar	need download two program order open account complication send code phone	Neutral	App Store	10/3/22 14:39	م٤٤٤م٤٤	10/3/22 14:39	ابو كلب				en	sa	0	1	0
App Store	Alinma-Bank	5cc93314-ef08-49b8-b97b-6ee34efd4ff1	The translation of "ÙØ¨Ø³" is "That's it" in English. However, "hamed46hhh" does not have a direct translation as it appears to be a username or a personal identifier.	ar	translation thats english however hamedhhh direct translation appear username personal identifier	Neutral	App Store	10/2/22 5:26	حامد حمدي	10/2/22 5:26	البنك دايم زحمه والموضفين غير سريعين بنجاز العملا				en	sa	0	1	0
App Store	Alinma-Bank	ec81a140-e85f-42fc-b7ba-bd777814529f	Use the application in Arabic language and always the login interface appears with codes instead of words.	ar	use application arabic language always login interface appear cod instead word	Neutral	App Store	9/19/22 13:41	Tarfa Mansour	9/19/22 13:41	دايما اول صفحة تكون مضروبة				en	sa	0	1	0
App Store	Alinma-Bank	a6a4de34-fee2-46d2-95e0-d3921d93e470	Please send the card to me by mail.	ar	please send card mail	Neutral	App Store	9/17/22 5:17	فلسطين&عمر	9/17/22 5:17	رياض				en	sa	0	1	0
App Store	Alinma-Bank	8ee91193-0fb3-4b77-ad97-70cd7a077b3c	Every time you enter the application, you have to enter the password and username. So what's the point of using facial recognition if I already activated it? Oh, how great is Al Rajhi Bank's application. They are very attentive to their application, and this is evidence of their concern for their customers.	ar	every time enter application enter password username whats point use facial recognition already activate oh great al rajhi bank application attentive application evidence concern customers	Neutral	App Store	9/4/22 20:13	EUSTSS	9/4/22 20:13	ما فائدة بصمة الوجه				en	sa	1	0	0
App Store	Alinma-Bank	686d5324-01a9-4764-9b2b-fdeeeddc18d7	Very upscale bank	ar	upscale bank	Neutral	App Store	8/18/22 17:53	ابو عبدالرحمن نبيل	8/18/22 17:53	جده				en	sa	1	0	0
App Store	Alinma-Bank	38369c01-4264-457e-921c-140897a918de	The advantages of development are unclear.	ar	advantage development unclear	Neutral	App Store	8/9/22 22:58	ma 128sor	8/9/22 22:58	تعديل				en	sa	1	0	0
App Store	Alinma-Bank	f1abf377-a4ad-4ce5-b0c4-a373b4774943	Is there an Alinma app for companies?	ar	alinma app company	Neutral	App Store	8/9/22 16:12	saleh1232	8/9/22 16:12	هل يوجد تطبيق الانماء للشركات ؟				en	sa	1	0	0
App Store	Alinma-Bank	209af720-7813-45d3-a2c8-dd9ea377a21d	The IBAN number for other banks is sufficient with the abbreviated form, and the dual name is preferable.	ar	iban number bank sufficient abbreviate form dual name preferable	Neutral	App Store	8/8/22 7:19	الكرملين	8/8/22 7:19	سرعة اضافة العميل				en	sa	1	0	0
App Store	Alinma-Bank	40d93e15-e53d-4c63-9927-271f089559de	Good, but many services redirect you to get them done through the branch.	ar	good many service redirect get do branch	Neutral	App Store	8/3/22 14:29	abujihadmarwani	8/3/22 14:29	بنك متطور				en	sa	0	1	0
App Store	Alinma-Bank	13e29c22-2f95-4123-9439-a9abafc45ac2	When I want to inquire about withdrawal and deposit transactions for my account, only 10 transactions appear, which forces me to search by months. What is required is for all account transactions to appear on the same page in sequence. Thank you.	ar	want inquire withdrawal deposit transactions account transactions appear force search months require account transactions appear page sequence thank	Neutral	App Store	7/5/22 20:26	Bayah26	7/5/22 20:26	ظهور عشرة عمليات في الحساب فقط				en	sa	0	1	0
App Store	Alinma-Bank	5aff9b9d-64c8-4071-b36c-f5c8c624cb58	The application needs more improvement in order to become more flexible.	ar	application need improvement order become flexible	Neutral	App Store	7/5/22 17:45	abomohannedh	7/5/22 17:45	يحتاج تطوير وتحسين				en	sa	1	0	0
App Store	Alinma-Bank	af9008d6-791f-4abd-aced-c9ee415cc43d	We distinguish ourselves as partners in this bank, not customers.	ar	distinguish partner bank customers	Neutral	App Store	6/8/22 2:14	abo wasam	6/8/22 2:14	تقييم				en	sa	1	0	0
App Store	Alinma-Bank	f5b287a7-821f-4db4-900a-6627ae36cd43	When I am inside the program and I exit, when I go to withdraw from the ATM, it refuses and asks me to log out of the program. I enter and log out, the same problem occurs. Log out of the program.	ar	inside program exit go withdraw atm refuse ask log program enter log problem occur log program	Neutral	App Store	5/28/22 20:17	أحمد أبو سيف	5/28/22 20:17	ربط بطاقة الصرافه في البرنامج				en	sa	0	1	0
App Store	Alinma-Bank	36c8a379-bb71-46ea-8aba-0cbb1b906500	Useful, thank you.	ar	useful thank	Neutral	App Store	5/1/22 13:07	ehab elbob	5/1/22 13:07	جدا مفيد				en	sa	0	0	0
App Store	Alinma-Bank	cb107f8c-4356-40fa-8e35-1546b27c1c45	After the latest update on 23-4-2022, the application started asking for an update every time you open it.	ar	late update application start ask update every time open	Neutral	App Store	4/23/22 18:02	Ibrahim alawagi	4/23/22 18:02	التحديث				en	sa	0	1	0
App Store	Alinma-Bank	38e135fe-5e7e-4455-9c5b-91b2f9ff49d1	Please clarify the formatting of the application, explain it using thicker lines, and also explain the colors.	ar	please clarify format application explain use thick line also explain color	Neutral	App Store	4/5/22 13:51	ااالعبدلي	4/5/22 13:51	الرياض				en	sa	1	0	0
App Store	Alinma-Bank	f5a81242-371e-4931-ac5e-f4455fa5c3dd	Every time I enter the application, it logs me out of the account after a few seconds and I have to log in again, and it logs me out again.	ar	every time enter application log account second log log	Neutral	App Store	4/4/22 13:24	Ghaaaaaaaada	4/4/22 13:24	كل ماتدخل الابلكيشن				en	sa	0	0	0
App Store	Alinma-Bank	f63233bc-6aba-472a-8136-3f3a6a34b297	The bank has launched completely.	ar	bank launch completely	Neutral	App Store	3/26/22 20:07	Omrashed033	3/26/22 20:07	الخبر				en	sa	0	1	0
App Store	Alinma-Bank	1a2a1382-8d54-4af2-aafe-99e05cd63081	The application is very good, but why doesn't it have a dark mode yet?	ar	application good doesnt dark mode yet	Neutral	App Store	3/21/22 13:07	M7senKF	3/21/22 13:07	Dark mode				en	sa	1	0	0
App Store	Alinma-Bank	dd2b0a58-daed-4c61-9de3-75e7ff5bbde3	I request simplifying the procedures for dealing with the bank's website and clarifying the process with easy steps.	ar	request simplify procedures deal bank website clarify process easy step	Neutral	App Store	3/15/22 5:10	Sultan1980zxdxvbh	3/15/22 5:10	تبسيط الاجراءات				en	sa	1	0	0
App Store	Alinma-Bank	745ac5a6-3072-4aa2-b986-6cd9c2a1da4b	I wish that the customer's browsing list is developed to include the name of the beneficiary when the customer reviews the list in the application. This will make it easier to distinguish between beneficiaries and help identify the intended beneficiary for any specific action or review by the account holder. Instead of only displaying account numbers, start and end dates, and amounts, without the…	ar	wish customers browse list develop include name beneficiary customer review list application make easy distinguish beneficiaries help identify intend beneficiary specific action review account holder instead display account number start end date amount without abbreviate name beneficiary	Neutral	App Store	3/15/22 4:58	Faner777	3/15/22 4:58	تقص معلومة بقائمة الاوامر المستديمة .				en	sa	1	1	0
App Store	Alinma-Bank	0affc3e7-717a-4257-966b-5ff8f939b9f0	In his banking services.	ar	bank service	Neutral	App Store	3/10/22 8:19	orince666	3/10/22 8:19	تطور مذهل وعجيب صنعه بنك الانماء				en	sa	0	1	0
App Store	Alinma-Bank	65574cf0-b7fd-4b71-8d2a-f0c12cd082d4	Dammam	ar	dammam	Neutral	App Store	3/6/22 11:54	روعه فيصل الصراري	3/6/22 11:54	خدمه ممتازه جدا وسهله في متناول اليد شكرًا لمصراف النما				en	sa	1	0	0
App Store	Alinma-Bank	a762a984-6cad-4489-b0f9-766e1473028c	Future Saudi Bank ðð¹	ar	future saudi bank	Neutral	App Store	3/4/22 10:54	Sal...A	3/4/22 10:54	تطوير مستمر				en	sa	1	0	0
App Store	Alinma-Bank	b52ca2ab-d405-4adf-88f5-616c802c8ad7	Respected bank, for real âï¸	ar	respect bank real	Neutral	App Store	2/1/22 22:47	مووحسن	2/1/22 22:47	عرعر				en	sa	1	0	0
App Store	Alinma-Bank	01c500fc-da62-4b33-b31d-836cd975ca36	Application for salary. Thank you.	ar	application salary thank	Neutral	App Store	1/31/22 13:26	الفا طميه	1/31/22 13:26	شكر				en	sa	1	0	0
App Store	Alinma-Bank	4f72ec0a-fdcf-4c19-92d9-2a0214437b30	It needs development.	ar	need development	Neutral	App Store	1/27/22 5:39	هخم	1/27/22 5:39	عبدالله				en	sa	1	0	0
App Store	Alinma-Bank	115573cd-0aa6-403a-b77c-ec4efb5761b0	Everything is fine except for the option to renew and print the card from the self-service machine, which has not been working for over two months. I hope this problem gets resolved because there are people who come from morning till closing time at the branch.	ar	everything fine except option renew print card selfservice machine work two months hope problem get resolve people come morning till close time branch	Neutral	App Store	1/16/22 15:42	OG FAhAD	1/16/22 15:42	غير قابل لتجديد البطاقه				en	sa	0	1	0
App Store	Alinma-Bank	09f92b8a-fca9-4903-85fb-dcdcabfd9860	Peace be upon you and the mercy and blessings of Allah. Dear colleagues, Please note that the colors of the ATM do not serve the customer as required, because the card numbers and the account holder's name are not completely clear, as well as the customer's name being binary rather than trinary in order to match the passport, especially outside the Kingdom. This causes some problems. Therefore, I…	ar	peace upon mercy blessings allah dear colleagues please note color atm serve customer require card number account holders name completely clear well customers name binary rather trinary order match passport especially outside kingdom cause problems therefore kindly request colleagues consider abovementioned issue thank kind cooperation fawzi alyami	Neutral	App Store	1/2/22 22:50	Fawzi Alyami	1/2/22 22:50	‏لون بطاقة الصراف				en	sa	1	1	0
App Store	Alinma-Bank	3df8d772-2af7-44e1-971f-0afc257156a8	Raises blood pressure	ar	raise blood pressure	Neutral	App Store	9/14/23 8:06	Ezuaan Al Yami	9/14/23 8:06	سيء				en	us	1	0	0
App Store	Alinma-Bank	f9a72c25-0b74-4fb4-be23-652971988797	Special services	ar	special service	Neutral	App Store	12/1/22 12:33	Abdullah2026	12/1/22 12:33	خدمات مميزة				en	us	0	1	0
App Store	Alinma-Bank	0deefc27-11ef-40e4-a600-5e1d5cf69223	I am traveling abroad and trying to access the bank's page on the app through my mobile phone and using the same mobile card for my Saudi number. However, every time I get a message stating that the device is not recognized and that a call from the bank will come, but the call only comes after multiple attempts. Sometimes the app opens, and sometimes it does not. I kindly request you to look into…	ar	travel abroad try access bank page app mobile phone use mobile card saudi number however every time get message state device recognize call bank come call come multiple attempt sometimes app open sometimes kindly request look matter necessity promote allabneh alinmaa work recommend many people hope service abroad exceptional assist customers put us difficult situations	Neutral	App Store	12/5/22 13:53	S2K FTW	12/5/22 13:53	سبب لي مشكلة اثناء السفر				en	us	1	1	0
App Store	Alinma-Bank	add73072-b37f-4f8f-b4bc-963b49664f1c	And modern...	ar	modern	Neutral	App Store	9/3/22 17:02	يا الله ياكريم	9/3/22 17:02	بنك نموذجي				en	us	1	0	0
App Store	Alinma-Bank	dcc93384-2ba1-4138-86e9-1b28cea5fcbc	Trust	ar	trust	Neutral	App Store	7/17/22 18:06	AHMED ALASMRI	7/17/22 18:06	ثقه				en	us	0	1	0
App Store	Alinma-Bank	ebc1e71c-c797-43b3-a112-cd45535869c8	Mawah means "water" in English.	ar	mawah mean water english	Neutral	App Store	4/27/22 17:54	sarab 3200	4/27/22 17:54	احبكم اقدع بنك				en	us	1	0	0
App Store	Alinma-Bank	a6859df0-3bc3-48fc-95e3-e5141f8cd287	"I created an account and received a message saying: 'You have exceeded the electronic attempts, please contact the nearest branch. Hahahaha, I just opened the application, how did I manage to exceed all the attempts? ð'"	ar	create account receive message say exceed electronic attempt please contact near branch hahahaha open application manage exceed attempt	Neutral	App Store	9/18/22 3:30	غبي جدا	9/18/22 3:30	👎				en	us	0	1	0
App Store	Alinma-Bank	c0430473-d64c-4078-95a3-1d9a56293b84	Both online and offline	en	online offline	Neutral	App Store	5/29/22 12:04	tanzeem94	5/29/22 12:04	Satisfactory banking services				en	in	0	1	0
App Store	Alinma-Bank	e57ee3ab-a1f2-4f02-a97e-ffff5cfa4339	Itâs possible to Transfer money without sms verification ?	en	possible transfer money without sms verification	Neutral	App Store	12/24/22 3:52	aym4ns	12/24/22 3:52	Need some improvement				en	kr	0	1	0
App Store	Alinma-Bank	8a8eb81f-f50b-4b2f-9f09-b730edb67cac	Accessible	en	accessible	Neutral	App Store	4/7/22 4:36	Radi2344	4/7/22 4:36	Rate				en	ph	0	1	0
App Store	Alinma-Bank	72683000-9c1d-4ea6-b6e2-38734248fa0d	The app has a feature allowing customers to add memo when doing a transaction and this helps a lot in recording purpose of transaction. However, when we access statements or online transaction history, we hardly see memos. The app also shows memo field as blank when you try to see details of individual transaction. Hope this gets fixed soon	en	app feature allow customers add memo transaction help lot record purpose transaction however access statements online transaction history hardly see memos app also show memo field blank try see detail individual transaction hope get fix soon	Neutral	App Store	6/10/23 17:52	Kottika	6/10/23 17:52	Memos not appearing on transactions				en	sa	0	1	0
App Store	Alinma-Bank	8c1fe45b-b2e8-4ae1-8a14-f1eceb9bee4c	When opening an account the customer should have the ability to choose a card design at least ounce	en	open account customer ability choose card design least ounce	Neutral	App Store	12/19/22 13:29	Hey dude(thumbs up)	12/19/22 13:29	Opening new account with Al-Inma bank is very easy				en	sa	1	0	0
App Store	Alinma-Bank	6242848a-36ce-4896-b1a1-f9982f06f770	When i go to the bank i find pleasing welcoming, fancy service and professional workers. The app is something else, where you use your own credentials and you are sure it's right, but the app doesn't approve and always sends you back to register every time.	en	go bank find please welcome fancy service professional workers app something else use credentials sure right app doesnt approve always send back register every time	Neutral	App Store	7/29/22 16:34	Nayef muda	7/29/22 16:34	Great bank, bad app				en	sa	1	1	0
App Store	Alinma-Bank	712ca5ca-0234-452f-b219-4a4b4353ecce	The application is good, but the mazaya point canât redeem	en	application good mazaya point cant redeem	Neutral	App Store	9/1/22 20:51	123radz	9/1/22 20:51	The application is good, but the mazaya point can’t reedeem				en	sa	1	1	0
App Store	Alinma-Bank	ca313aa3-d952-4b72-b6ad-ce98c8e12158	Need a facility to make sadad payment through Credit card allow sadad payment	en	need facility make sadad payment credit card allow sadad payment	Neutral	App Store	8/3/23 21:52	amkku	8/3/23 21:52	Need a facility to make sadad payment through Credit card allow sadad payment				en	sa	1	1	0
App Store	Alinma-Bank	79a928e6-065d-423c-8514-86c41ed0028a	Number one service in banking sector	en	number one service bank sector	Neutral	App Store	4/15/23 13:40	Gosan Al andaleeb	4/15/23 13:40	As a friend				en	sa	0	0	0
App Store	Alinma-Bank	71cafcb0-f8a4-4158-a18c-c7dd99ec8cc6	I have been trying many times to get in to Alinma app, however I couldnât despite I am updating it.	en	try many time get alinma app however couldnt despite update	Neutral	App Store	3/16/23 15:01	Abdulaziz khabti	3/16/23 15:01	The app is not working				en	sa	0	1	0
App Store	Alinma-Bank	0f043d4a-66be-49f6-88b4-1a2a0ab06263	Kindly remove one of the apps from the App Store to avoid any confusion	en	kindly remove one apps app store avoid confusion	Neutral	App Store	7/31/23 12:07	Foggy215	7/31/23 12:07	Which is the official?				en	sa	1	0	0
App Store	Alinma-Bank	297626e1-9b6a-4f75-a204-6033bc193ea9	jgz	nl	jgz	Neutral	App Store	1/2/22 18:55	ghhhhkm	1/2/22 18:55	n				en	sa	0	0	0
App Store	Alinma-Bank	19390bc4-81ec-45cb-9f20-1d44e34f7923	Ok	en	ok	Neutral	App Store	9/13/22 12:47	big a head	9/13/22 12:47	Ok and nice 👍👍👍👍👍👍👍👍👍👍👍👍👍👍👍				en	sa	0	0	0
App Store	Alinma-Bank	77d11f42-404c-4e08-8798-145deea50c00	ðð»ðð»â¥ï¸	und		Neutral	App Store	1/13/22 15:54	shahadsheba	1/13/22 15:54	👍🏻👍🏻				en	sa	0	0	0
App Store	Alinma-Bank	dbc69ffc-946a-424a-a692-c3dd6bf20e15	huked	et	huked	Neutral	App Store	9/12/23 16:05	saeedhoussin	9/12/23 16:05	saoudi				en	sa	0	0	0
App Store	Alinma-Bank	4b3e3609-8561-4c99-99f2-0dcd83095521	Naic	en	naic	Neutral	App Store	1/16/22 17:29	989 عبدالرحمن	1/16/22 17:29	Naic				en	sa	0	0	0
App Store	Alinma-Bank	486b56d4-d617-4075-b7e3-97b50bac0704	1211	und		Neutral	App Store	12/14/22 22:51	ابورااااكان	12/14/22 22:51	ابورااااكان				en	sa	0	0	0
App Store	Alinma-Bank	72e30e47-fafe-49f6-a7dc-97b2802f1e16	This App is way better than the new one, and no body want to read and study the issues	en	app way good new one body want read study issue	Neutral	App Store	9/15/23 8:09	Alhariri	9/15/23 8:09	Better than new version				en	us	0	0	0
App Store	Alinma-Bank	44866e1c-130f-4975-9927-360ed2874e67	Increasing the financing limit for those committed to repaying the monthly installments	sd	increase finance limit commit repay monthly installments	Neutral	App Store	6/13/22 22:03	الدلبجي	6/13/22 22:03	رفع حد التمويل للملتزمين بسداد الأقساط الشهرية				en	sa	0	0	0
App Store	Alinma-Bank	3f6835d4-ab6e-4e5a-b12d-31bae2c353fb	Application	ur	application	Neutral	App Store	3/7/23 13:08	Adel hosny	3/7/23 13:08	تطبيق				en	sa	0	1	0
App Store	Alinma-Bank	be2a8618-fca3-4ee5-a0d7-9726c7d083c5	And enjoy a beautiful experienceð	ar	enjoy beautiful experience	Positive	App Store	9/12/23 11:02	ابو هيما ٢٠١١	9/12/23 11:02	خدمات جداً جداً جداً ممتازه ومريحه وتستحق التجربه				en	eg	0	0	0
App Store	Alinma-Bank	e26182dd-7921-4ee4-9258-a0e9d69a69e6	The bank is excellent and not crowded, but the old application was better and easier.	ar	bank excellent crowd old application good easy	Positive	App Store	1/13/22 21:15	ahmed shawky 84	1/13/22 21:15	ريفيو				en	eg	1	0	0
App Store	Alinma-Bank	f8e204a2-d586-464e-bdc6-0daf699560d9	Truly, the best and easiest online service provider between all banks and financial institutions.	ar	truly best easy online service provider bank financial institutions	Positive	App Store	2/16/22 5:21	Mafadag	2/16/22 5:21	افضل خدمات بنكيه				en	gb	0	0	0
App Store	Alinma-Bank	b2aa22e9-8652-4b95-8490-2e35db7494a0	Beautiful and fast application.	ar	beautiful fast application	Positive	App Store	8/27/23 11:06	Rabea Fahad	8/27/23 11:06	Good Alinma bank				en	sa	0	0	0
App Store	Alinma-Bank	6923d77f-9305-4b22-aced-66cfa75fddbd	excellent	ar	excellent	Positive	App Store	9/5/22 11:51	النيء	9/5/22 11:51	ممتاز				en	sa	0	0	0
App Store	Alinma-Bank	388ae21d-79e0-4404-8028-f00c3908e933	A wonderful and easy-to-use application, where everything you need is available in it.	ar	wonderful easytouse application everything need available	Positive	App Store	2/16/22 1:21	حسيينن محمد	2/16/22 1:21	تطبيق الإنماء				en	sa	0	0	0
App Store	Alinma-Bank	49936f62-47ad-40bb-8795-86e8a039c7c2	The best banking application ever ð«¡	ar	best bank application ever	Positive	App Store	8/26/23 11:26	خوخ ٢٠٢٣	8/26/23 11:26	جدة				en	sa	0	0	0
App Store	Alinma-Bank	295dd18d-e2f1-4c98-b6e2-901eace8c6a2	Just as you make me happy by making the procedures for operations easier for you.	ar	make happy make procedures operations easy	Positive	App Store	8/21/23 9:48	him12373735372728	8/21/23 9:48	سعادتكم تهمني				en	sa	0	0	0
App Store	Alinma-Bank	5483ba03-6148-4762-838d-bac3e504e017	An excellent application	ar	excellent application	Positive	App Store	8/17/23 21:12	سعيد بورايد	8/17/23 21:12	ممتاز				en	sa	0	0	0
App Store	Alinma-Bank	f31d540d-894b-4de9-9d09-def47e0b388b	Thank you	ar	thank	Positive	App Store	8/17/23 5:04	ابورغد بجوي	8/17/23 5:04	جازان				en	sa	0	0	0
App Store	Alinma-Bank	e3873ca6-26a5-4d24-9f64-60746d2896c6	Wonderful	ar	wonderful	Positive	App Store	8/15/23 18:58	ابو العز٦	8/15/23 18:58	انصح به				en	sa	0	0	0
App Store	Alinma-Bank	9989fbc1-bc56-40b4-bc35-8fed7b54a857	Thank you. Development â¤ï¸ Ease of service. Ease of access and speed of accomplishment â¤ï¸	ar	thank development ease service ease access speed accomplishment	Positive	App Store	8/10/23 14:00	Denyay	8/10/23 14:00	شكراً انماء				en	sa	0	0	0
App Store	Alinma-Bank	3e5b7297-4e7a-4509-98a9-7e2b56d66088	To Allah be the pearls (meaning: You are precious in the sight of Allah).	ar	allah pearl mean precious sight allah	Positive	App Store	8/6/23 22:48	ابوبشير اللؤلؤلي	8/6/23 22:48	شكر وتقدير				en	sa	1	0	0
App Store	Alinma-Bank	5532c319-efbc-4166-a044-315c1aa7d187	The best bank we have ð¹	ar	best bank	Positive	App Store	8/6/23 10:40	#سعود_الساير	8/6/23 10:40	بنك الإنماء				en	sa	0	0	0
App Store	Alinma-Bank	ffaeba0a-ac68-4c65-9058-428328c4cc41	Thank you for this wonderful application and excellent services. It is truly beautiful. Best regards, Saad Al-Khamees, Riyadh.	ar	thank wonderful application excellent service truly beautiful best regard saad alkhamees riyadh	Positive	App Store	7/31/23 13:11	Saad alkhamis	7/31/23 13:11	شكر وتقدير				en	sa	0	0	0
App Store	Alinma-Bank	98a0a627-0d0c-4303-85d4-3aa8865de820	Thank you for your cooperation. A prestigious bank in every sense of the word.	ar	thank cooperation prestigious bank every sense word	Positive	App Store	7/26/23 14:28	Fahad 2023	7/26/23 14:28	لا يوجد				en	sa	0	0	0
App Store	Alinma-Bank	97483884-f665-48c6-a6f4-7447b65f130f	The best bank in terms of employee behavior is Alinma Bank, despite dealing with only one bank among all the banks I have dealt with.	ar	best bank term employee behavior alinma bank despite deal one bank among bank deal	Positive	App Store	7/25/23 0:05	ابو همام اليافعي	7/25/23 0:05	القصيم الرس				en	sa	1	0	0
App Store	Alinma-Bank	e29b1f6d-9045-4109-9af4-1a70a6e91812	The bank's service is organized and convenient, and its mobile application offers all services in an advanced manner. One of the most important features is the finance calculator, which provides a quick overview of financing options in moments.	ar	bank service organize convenient mobile application offer service advance manner one important feature finance calculator provide quick overview finance options moments	Positive	App Store	7/19/23 18:20	C4164	7/19/23 18:20	NAWAL Abdulrhman Alqurashi				en	sa	1	0	0
App Store	Alinma-Bank	86dddcc1-6022-4de0-9392-5e44f8a3a268	I have tried most Saudi banks, Alinma Bank is the best bank that respects the customer and provides all services online without the need to go to the branch, whether for individuals or institutions.	ar	try saudi bank alinma bank best bank respect customer provide service online without need go branch whether individuals institutions	Positive	App Store	7/17/23 8:32	saud!	7/17/23 8:32	افضل بنك يحترم العميل				en	sa	0	0	0
App Store	Alinma-Bank	5c500d1d-b292-4a5c-956a-f50601138c37	The application is clear and easy to use despite all the updates and changes. It is still smooth, thanks be to God.	ar	application clear easy use despite update change still smooth thank god	Positive	App Store	7/13/23 11:17	احب اجرب بعض البرامج	7/13/23 11:17	تغريد				en	sa	0	0	0
App Store	Alinma-Bank	0f5add68-3f6e-4357-850c-925ecf497f1f	Hello and may peace, mercy, and blessings be upon you. No problem at all, my dear bank. We would like to have the feature of scanning beneficiaries. I have some individuals who have been transferred to only once. So, I hope the feature of scanning beneficiaries can be available.	ar	hello may peace mercy blessings upon problem dear bank would like feature scan beneficiaries individuals transfer hope feature scan beneficiaries available	Positive	App Store	7/16/23 20:23	سسللاامم	7/16/23 20:23	مسح المستفيدين				en	sa	0	1	0
App Store	Alinma-Bank	21bdb77b-c2da-463d-922d-09c1790aec61	The customer service is excellent, and the response is fast and understandable. I ordered a card on the website and went to print it at the bank. It didn't take a minute from me. They are cooperative, I congratulate them. ðð»	ar	customer service excellent response fast understandable order card website go print bank didnt take minute cooperative congratulate	Positive	App Store	7/10/23 1:43	amiile_	7/10/23 1:43	خدمات رائعه				en	sa	1	0	1
App Store	Alinma-Bank	05a514d4-b9b5-4035-80c1-d173d61aada5	I am very grateful to you and to all the services you provide.	ar	grateful service provide	Positive	App Store	7/6/23 17:16	Award algahtani	7/6/23 17:16	جده				en	sa	1	0	0
App Store	Alinma-Bank	63ae2ad9-f07c-4dc2-bcfc-087e4988af34	Continue at this great level.	ar	continue great level	Positive	App Store	6/22/23 15:03	ZAza-1403	6/22/23 15:03	يالتوفيق لكم				en	sa	0	0	0
App Store	Alinma-Bank	e60d767d-bcf1-4004-9353-81bd3cd69e94	The best always.	ar	best always	Positive	App Store	6/12/23 18:39	وشكي	6/12/23 18:39	الإنماء				en	sa	0	0	0
App Store	Alinma-Bank	f7eb44f8-1210-448e-8f0a-c5074ef37859	Excellent and I consider it one of the best banks in terms of services and electronic platform.	ar	excellent consider one best bank term service electronic platform	Positive	App Store	6/5/23 7:19	A. S . Almujalli	6/5/23 7:19	اكثر من ممتاز				en	sa	0	0	0
App Store	Alinma-Bank	cdb92121-e62b-4e44-8b7a-53dba1d7b041	One of the best banks to deal with, honestly. Thank you.	ar	one best bank deal honestly thank	Positive	App Store	6/2/23 10:02	Waeldddhhhh	6/2/23 10:02	رسالة شكر				en	sa	0	0	0
App Store	Alinma-Bank	54605142-9187-4e33-bd16-f3cb0b87455e	Thank you from the bottom of my heart.	ar	thank bottom heart	Positive	App Store	6/1/23 15:50	Ahsaam2016	6/1/23 15:50	حي الصفا العطاس				en	sa	0	0	0
App Store	Alinma-Bank	2a71ca5c-f0c6-4af4-a94e-33025850bdab	The bank has excellent customer services.	ar	bank excellent customer service	Positive	App Store	5/30/23 16:42	اخو العيال 7	5/30/23 16:42	الرياض				en	sa	0	0	0
App Store	Alinma-Bank	9b7aaf00-3463-419b-9fda-ab7c8b2957c2	Welcome to my Snapchat moonq200.	ar	welcome snapchat moonq	Positive	App Store	5/29/23 21:27	متجر رومنسيات	5/29/23 21:27	kkk				en	sa	0	1	0
App Store	Alinma-Bank	349ee925-f96f-4648-a851-d89e8cf01100	A very beautiful and fast application.	ar	beautiful fast application	Positive	App Store	5/29/23 16:09	jaber99999999	5/29/23 16:09	تعليق				en	sa	0	0	0
App Store	Alinma-Bank	ab329409-c072-4e89-af9c-026c0d8a9f5b	Thank you from the bottom of our hearts, you have made our lives easier.	ar	thank bottom hearts make live easy	Positive	App Store	5/28/23 18:49	خدمة جميله الله يسعدكم	5/28/23 18:49	شكر				en	sa	1	0	0
App Store	Alinma-Bank	e64e4f89-14e0-4bcc-ad7e-c0648e5454c5	This application is much better than the new one.	ar	application much good new one	Positive	App Store	5/28/23 0:34	dahm1234	5/28/23 0:34	ه				en	sa	1	0	0
App Store	Alinma-Bank	b5e4e5f3-1296-40ee-998d-6170ef3a4972	One of the best banks in the kingdom, whether in terms of application or direct transactions in branches, and their efforts are greatly appreciated. My favorite bank. ð¤ð¤	ar	one best bank kingdom whether term application direct transactions branch efforts greatly appreciate favorite bank	Positive	App Store	5/28/23 0:27	عبدالرحمن @@	5/28/23 0:27	الانماء في تطور مستمر				en	sa	0	0	0
App Store	Alinma-Bank	b7543ae4-0f04-4a7f-a0a4-288097436b79	Easy entry and also organized. Honestly, a beautiful start and I hope to conduct all my transactions on it.	ar	easy entry also organize honestly beautiful start hope conduct transactions	Positive	App Store	5/24/23 8:50	ابو البراااق	5/24/23 8:50	ممتاز جدا				en	sa	1	0	0
App Store	Alinma-Bank	582ef136-4ead-448a-9f4c-5994db04ffba	The application is very easy and flexible to use.	ar	application easy flexible use	Positive	App Store	5/23/23 15:03	عبدالله ضراس	5/23/23 15:03	بريدة				en	sa	0	0	0
App Store	Alinma-Bank	a0726a1e-ffd4-48d3-a993-8b8923dbc044	Thank you for this wonderful, easy, and convenient application.	ar	thank wonderful easy convenient application	Positive	App Store	5/14/23 1:16	Hasan Alharbi	5/14/23 1:16	بدر منطقة المدينة المنورة				en	sa	0	0	0
App Store	Alinma-Bank	e1632397-c12e-4b74-bff3-dddfa8deb3e1	"Application is one of the most beautiful and easiest banking applications ðð»"	ar	application one beautiful easy bank applications	Positive	App Store	5/11/23 5:24	محمد الشششمري	5/11/23 5:24	Mohammad alshammari				en	sa	0	0	0
App Store	Alinma-Bank	a771bc95-75bb-4dd0-aff7-7fc1e7742495	Honestly, I love the Alinma application for its smoothness and flexibility.	ar	honestly love alinma application smoothness flexibility	Positive	App Store	5/10/23 18:15	saleh-	5/10/23 18:15	ممتاز اخوكم عميل من 2009				en	sa	0	0	0
App Store	Alinma-Bank	d0384a30-ce08-49a2-939f-cd7db8d54703	The best bank in dealing.	ar	best bank deal	Positive	App Store	5/9/23 14:57	أبو فارس 2023	5/9/23 14:57	يستاهل خمس نجوم				en	sa	0	0	0
App Store	Alinma-Bank	f94ecc68-7098-4154-9902-1ba75c573d70	Excellent and the fastest bank, mashallah.	ar	excellent fast bank mashallah	Positive	App Store	4/25/23 19:45	أبووو أحمد	4/25/23 19:45	الانماء				en	sa	0	0	0
App Store	Alinma-Bank	56676e6c-9ded-40c2-82d9-ab0a99310e59	"The application is good and helpful for chemistry."	ar	application good helpful chemistry	Positive	App Store	5/1/23 17:22	الكيميا	5/1/23 17:22	الري				en	sa	0	0	0
App Store	Alinma-Bank	7d4a8a9e-52fa-4f96-849c-310cdae2c838	Thank you for your cooperation.	ar	thank cooperation	Positive	App Store	4/20/23 23:28	Riyadh a	4/20/23 23:28	تحياتي				en	sa	0	0	0
App Store	Alinma-Bank	b08cc4bf-5fb4-4941-93db-434b4be9fe93	Your services are excellent and distinctive, deserving thanks and praise.	ar	service excellent distinctive deserve thank praise	Positive	App Store	4/20/23 16:14	عيسى عشي	4/20/23 16:14	مميزون				en	sa	0	0	0
App Store	Alinma-Bank	dc5f1f38-b143-4ed5-a35c-33ef38a55855	The best bank in all aspects ðð»	ar	best bank aspects	Positive	App Store	4/19/23 21:38	باحثة ٢٠٧	4/19/23 21:38	رائع				en	sa	0	0	0
App Store	Alinma-Bank	2b0742b4-f0ae-4f4f-91bc-fe795b072b7c	An extremely easy and wonderful application.	ar	extremely easy wonderful application	Positive	App Store	4/17/23 12:29	Dr.Ibra7im	4/17/23 12:29	رائع				en	sa	0	0	0
App Store	Alinma-Bank	6b21e11d-9daa-4251-8832-6a82108d168c	Thanks	ar	thank	Positive	App Store	4/11/23 2:40	Sg2030	4/11/23 2:40	شكرا لكم				en	sa	0	0	0
App Store	Alinma-Bank	119d0858-e42b-407e-97f4-801e0e49f702	May Allah reward you with goodness for the speed and ease of the application. The best and most beautiful bank. Thank you from the bottom of my heart. ð¤	ar	may allah reward goodness speed ease application best beautiful bank thank bottom heart	Positive	App Store	4/10/23 6:57	nawafy002	4/10/23 6:57	فتح حساب جاري عن طريق الجوال				en	sa	1	0	0
App Store	Alinma-Bank	d8b673ca-3160-40ee-837b-deef099dd5ab	May God bless you / May God grant you success	ar	may god bless may god grant success	Positive	App Store	4/9/23 23:58	kards112233	4/9/23 23:58	وفقكم الله				en	sa	1	0	0
App Store	Alinma-Bank	988562db-6e03-4d65-a17a-e3fbdf892fbe	Thank you for your efforts.	ar	thank efforts	Positive	App Store	4/7/23 21:27	كــحـيـلانــ	4/7/23 21:27	القصيم				en	sa	0	0	0
App Store	Alinma-Bank	29a13143-e2f4-41d9-be28-bc3ef45e6a37	Excellent and fast service.	ar	excellent fast service	Positive	App Store	4/7/23 14:05	الجيلاوي2023	4/7/23 14:05	الجبيل				en	sa	0	0	0
App Store	Alinma-Bank	f89c3cc2-a33e-4ca8-93b2-b8aca356cd54	The best bank with easy and convenient services ðð¼	ar	best bank easy convenient service	Positive	App Store	3/31/23 19:16	ابوتركي.	3/31/23 19:16	افضل بنك				en	sa	0	0	0
App Store	Alinma-Bank	2fa6facc-5530-4cbb-aca0-1cbdbef24df4	Very sophisticated and excellent bank with employees of high efficiency and noble morals. Thank you, Bank Alinma.	ar	sophisticate excellent bank employees high efficiency noble morals thank bank alinma	Positive	App Store	3/30/23 8:05	عبدالله المرير	3/30/23 8:05	الدمام				en	sa	0	0	0
App Store	Alinma-Bank	9f8427a5-7c46-42a7-a669-9e48a9873044	The added features are great, they have made it easy to use and access quickly ð¤ð¤	ar	add feature great make easy use access quickly	Positive	App Store	3/27/23 5:29	بدر ابو انور	3/27/23 5:29	تحديث رائع جدا				en	sa	0	0	0
App Store	Alinma-Bank	756d8df0-de0c-4e35-9129-ba7933c06ec4	Easy and flexible application with good offers for international transfers.	ar	easy flexible application good offer international transfer	Positive	App Store	3/24/23 21:40	ABDULHAKIM 77	3/24/23 21:40	تطبيق جيد				en	sa	0	0	0
App Store	Alinma-Bank	065a6e93-5b13-4fcd-b92a-f34b478c5fc5	Easy and excellent.	ar	easy excellent	Positive	App Store	3/15/23 11:50	عــــــويد	3/15/23 11:50	ممتاز				en	sa	0	0	0
App Store	Alinma-Bank	34f6bf35-99c6-4c29-8eba-e02a5ac34e5e	Thank you from the heart.	ar	thank heart	Positive	App Store	3/10/23 16:11	هدايا أبها خميس مشيط	3/10/23 16:11	شكراً				en	sa	0	0	0
App Store	Alinma-Bank	573c8889-64e2-4f47-a47d-bb6c5a555cdb	In this bank, they feel the importance of time, so they race to complete their tasks quickly and accurately.	ar	bank feel importance time race complete task quickly accurately	Positive	App Store	3/6/23 15:32	إبراهيم سكيرب وسعد عقاب	3/6/23 15:32	د.إبراهيم المطيري				en	sa	1	0	0
App Store	Alinma-Bank	baba0836-0735-4730-b004-22a8c33c4aea	Honestly, the application is easy and versatile with a variety of comparison services compared to other bank applications.	ar	honestly application easy versatile variety comparison service compare bank applications	Positive	App Store	3/3/23 10:36	gtgtfg	3/3/23 10:36	سهل و متنوع				en	sa	0	0	0
App Store	Alinma-Bank	38affe8c-f9a6-4d7c-9354-91be703920cb	Beautiful	ar	beautiful	Positive	App Store	2/28/23 22:11	reekbbsb	2/28/23 22:11	ً				en	sa	0	0	0
App Store	Alinma-Bank	4abbbc07-cf21-43da-9c90-448b2720eb38	A wonderful application that is easy to use and can accomplish many transactions.	ar	wonderful application easy use accomplish many transactions	Positive	App Store	2/24/23 20:19	Talal alafif	2/24/23 20:19	الرياض				en	sa	0	0	0
App Store	Alinma-Bank	5b8ac66a-61c7-41c3-8c20-7aa722ba0b40	Good experience, somewhat easy.	ar	good experience somewhat easy	Positive	App Store	2/28/23 6:44	ذو شخصيه	2/28/23 6:44	تجربه جيدجداً				en	sa	0	0	0
App Store	Alinma-Bank	a708c742-08e3-43e8-b269-a77ccd19456b	I decided to try the Enmaa online development honestly. It's great, but the branches need fast service. Overall, my evaluation so far is excellent.	ar	decide try enmaa online development honestly great branch need fast service overall evaluation far excellent	Positive	App Store	2/22/23 20:27	ابوحمدالسبعي	2/22/23 20:27	هروب سريع من بنك اخر				en	sa	1	0	0
App Store	Alinma-Bank	eba22dd8-59e2-4b32-8b67-42b4ae413b70	Amazing, easy, and fast.	ar	amaze easy fast	Positive	App Store	2/21/23 15:54	الثقر	2/21/23 15:54	الطائف				en	sa	0	0	0
App Store	Alinma-Bank	2aa10984-923c-4ba9-8e24-2b2d8f5903ac	The best banking application, based on experience.	ar	best bank application base experience	Positive	App Store	2/14/23 8:11	محمد خلف المطيري	2/14/23 8:11	التطبيق الأول				en	sa	0	0	0
App Store	Alinma-Bank	8973f48a-a174-44a4-930a-bcd8478bdc01	The best banking services.	ar	best bank service	Positive	App Store	2/15/23 20:18	Theabuhomaid	2/15/23 20:18	رااااائع				en	sa	0	0	0
App Store	Alinma-Bank	c2e9d0fe-05b6-4ff3-ac59-cd92bf9d3158	Development of the application and banking operations in its new form, and I hope you visit Al Rajhi and Riyadh application in the same style, but you should be different from them with better features.	ar	development application bank operations new form hope visit al rajhi riyadh application style different good feature	Positive	App Store	2/14/23 16:19	ماجد ابو ناصر 2023	2/14/23 16:19	تصوير تطبيق الانماء بإطلاقات جديدة				en	sa	1	0	0
App Store	Alinma-Bank	1236354c-e375-4421-8b2e-a3fc61f53af0	Al Inma Bank is very distinguished in its advanced electronic services, always moving forward.	ar	al inma bank distinguish advance electronic service always move forward	Positive	App Store	2/12/23 11:05	a.fa51	2/12/23 11:05	شكراً لكم				en	sa	1	0	0
App Store	Alinma-Bank	8a3df45b-7174-4f84-b133-5fe91a92f724	Excellent service and high level of security, indeed.	ar	excellent service high level security indeed	Positive	App Store	2/11/23 21:46	ابوًفراس	2/11/23 21:46	الإنماء وبس				en	sa	0	0	0
App Store	Alinma-Bank	67a62f75-0ec6-41fc-814c-a122033e72dc	The best bank is Alinma. They are easy to deal with and their website is very user-friendly and excellent. I have been dealing with Alinma for more than 8 years. They are my favorite bank. Thank you, Alinma.	ar	best bank alinma easy deal website userfriendly excellent deal alinma years favorite bank thank alinma	Positive	App Store	2/11/23 15:55	salemg07	2/11/23 15:55	افضل بنك				en	sa	0	0	0
App Store	Alinma-Bank	f223968f-165f-4818-9628-f20279a39199	Oh, how beautiful you are and how beautiful is the way your employees treat others.	ar	oh beautiful beautiful way employees treat others	Positive	App Store	2/10/23 14:58	فاطمة ١١	2/10/23 14:58	اشهد انكم بنك فخم				en	sa	1	0	0
App Store	Alinma-Bank	25f3eeec-4cc2-401c-8092-50e207c33f8f	The program has become easier and better ðð»ðð»	ar	program become easy good	Positive	App Store	2/9/23 8:39	Nikemanaj	2/9/23 8:39	تطور جميل جداً				en	sa	0	0	0
App Store	Alinma-Bank	4d006aee-43b1-4572-8821-e3eef7c32e6d	May Allah reward you with goodness.	ar	may allah reward goodness	Positive	App Store	2/7/23 3:02	مختار عبدالله	2/7/23 3:02	المنار				en	sa	1	0	0
App Store	Alinma-Bank	4829df5c-e9fc-4491-a3ea-8f6ae06ebd51	The application is easy and clear, and the response to inquiries is quickðð»	ar	application easy clear response inquiries quick	Positive	App Store	2/5/23 6:21	ASHJAN💕	2/5/23 6:21	افضل بنك				en	sa	0	0	0
App Store	Alinma-Bank	695a638a-3bb2-41ad-bbdb-56e17d3694f2	I have used an application before, and at first, I said that Al Rajhi application is the best. Now, honestly, Alinma is stronger by a thousand times. Please continue in this development and creativity. ðª	ar	use application first say al rajhi application best honestly alinma strong thousand time please continue development creativity	Positive	App Store	2/4/23 10:40	1.11e+19	2/4/23 10:40	تطبيق الانماء				en	sa	1	0	0
App Store	Alinma-Bank	b23af444-f4f5-4e1d-a03b-fdd3b3c6c4bd	First of all, I wish you more progress and prosperity. And I am very thankful to you for your kindness and good management.	ar	first wish progress prosperity thankful kindness good management	Positive	App Store	2/2/23 16:28	addddddrededdrr	2/2/23 16:28	بطاقة شكر				en	sa	1	0	0
App Store	Alinma-Bank	534e9200-3209-4ca7-a44b-018761d7b598	The best bank.	ar	best bank	Positive	App Store	2/1/23 3:25	حجحخ	2/1/23 3:25	تقييم				en	sa	0	0	0
App Store	Alinma-Bank	3fb14cb0-ee61-4bb8-8efa-670590b2f65c	The application is more than wonderful, comprehensive for all financial aspects.	ar	application wonderful comprehensive financial aspects	Positive	App Store	1/29/23 16:34	جحيمرونا	1/29/23 16:34	بريدة حي الريان				en	sa	0	0	0
App Store	Alinma-Bank	d5b946f3-c1eb-42b6-82e0-9dbc98cfb061	Currently, it is considered the best bank in Saudi Arabia with exceptional service, and they do not discriminate between customers.	ar	currently consider best bank saudi arabia exceptional service discriminate customers	Positive	App Store	1/25/23 17:27	MR0000000	1/25/23 17:27	MR				en	sa	1	0	0
App Store	Alinma-Bank	c7dffcda-171c-4513-ad1e-6d6a1ee8df5c	A simple, easy-to-use program with many services.	ar	simple easytouse program many service	Positive	App Store	1/26/23 14:46	iajafari	1/26/23 14:46	السعوديه				en	sa	0	0	0
App Store	Alinma-Bank	ab6d148c-2a44-478e-a310-01a1b4ce18c0	The best bank you can deal with.	ar	best bank deal	Positive	App Store	1/15/23 20:39	sona5446	1/15/23 20:39	اجمل بنك فيك ي سعوديه				en	sa	0	0	0
App Store	Alinma-Bank	95271f8a-9e6d-405f-ae9d-35784b23cfaa	I love this bank and all of their services.	ar	love bank service	Positive	App Store	1/9/23 5:52	ابوف ه د	1/9/23 5:52	تقييم				en	sa	0	0	0
App Store	Alinma-Bank	155448eb-20ab-41c9-9516-f25ba98e4bad	One of the best banks in all services" in English	ar	one best bank service english	Positive	App Store	1/8/23 23:24	آبن اللواء	1/8/23 23:24	من افضل البنوك في جميع الخدمات				en	sa	0	0	0
App Store	Alinma-Bank	044b7bd5-18e3-4fb8-9575-ba775cdd9957	He deserves more than 5 stars.	ar	deserve star	Positive	App Store	1/6/23 6:23	محمود عويس	1/6/23 6:23	تطبيق ممتاز جدا سهل وسلس				en	sa	1	0	0
App Store	Alinma-Bank	20ed4cab-77b2-411b-b30c-e04aa065c8eb	In fact, I thank you for the high quality, excellent service, and classy approach in your services to your customers. I wish you all the success and prosperity from the bottom of my heart.	ar	fact thank high quality excellent service classy approach service customers wish success prosperity bottom heart	Positive	App Store	1/4/23 20:25	طارق ناصر بلال	1/4/23 20:25	السادة بنك إنماء المحترمين				en	sa	1	0	0
App Store	Alinma-Bank	3b774f89-1db4-42cc-8add-12eec34095c8	The employees' excellent treatment and the bank's high quality.	ar	employees excellent treatment bank high quality	Positive	App Store	1/1/23 1:58	خـــالــد الشمري	1/1/23 1:58	حائل				en	sa	0	0	0
App Store	Alinma-Bank	39017e5e-0629-4305-8d8c-6521c42cfba8	May God give you wellness for your work.	ar	may god give wellness work	Positive	App Store	12/28/22 18:29	Azooz3052	12/28/22 18:29	AZ				en	sa	1	0	0
App Store	Alinma-Bank	641f1df9-3b7c-4ffb-b44a-95b21b8dcfae	Your service is excellent and response time is fast, but we sometimes encounter slowness in opening icons, and the most frequent issue we face is when we try again, if we press the icon. We hope that your services will be better than Al Rajhi. It is true that Al Rajhi has an excellent application, but we want the NCB application to be better than Al Rajhi. Thank you.	ar	service excellent response time fast sometimes encounter slowness open icons frequent issue face try press icon hope service good al rajhi true al rajhi excellent application want ncb application good al rajhi thank	Positive	App Store	12/26/22 22:03	husseinmoon	12/26/22 22:03	خدمات ممتازة				en	sa	0	0	1
App Store	Alinma-Bank	7ffa18d1-7d88-41d1-9b13-f6e1e4d666a8	The most beautiful and easiest applicationðð»	ar	beautiful easy application	Positive	App Store	12/24/22 4:11	ابو حمد حمني	12/24/22 4:11	تطبيق لمصرف👍🏻				en	sa	0	0	0
App Store	Alinma-Bank	4ca52c7c-540b-4ed9-ab86-1143c8fbd39e	Thank you, Alinma Bank.	ar	thank alinma bank	Positive	App Store	12/23/22 15:00	11hg99	12/23/22 15:00	جازان				en	sa	0	0	0
App Store	Alinma-Bank	a1976fe0-ca1c-44cc-8902-124b4a2d7112	A bank that is more than wonderful and deserves appreciation, loved by every employee working in this bank. Thank you.	ar	bank wonderful deserve appreciation love every employee work bank thank	Positive	App Store	12/20/22 22:19	صدًيق	12/20/22 22:19	شكرا				en	sa	0	0	0
App Store	Alinma-Bank	78d1faaf-e05f-40a1-9df2-ac084e8938de	Easy and clear integrated services.	ar	easy clear integrate service	Positive	App Store	12/20/22 18:46	naif fahd	12/20/22 18:46	التطبيق				en	sa	0	0	0
App Store	Alinma-Bank	ff56c784-6ec1-488d-8b3f-996403e4a10c	Thank you and appreciation to you for your tremendous efforts and progress.	ar	thank appreciation tremendous efforts progress	Positive	App Store	12/20/22 9:47	knm_44	12/20/22 9:47	تمنياتي لكم بتوفيق				en	sa	0	0	0
App Store	Alinma-Bank	cca968ee-8237-47b1-845b-28b7ef0b1ee0	They deserve five stars for their customer service.	ar	deserve five star customer service	Positive	App Store	12/19/22 21:48	ماجد حبيب	12/19/22 21:48	بنك الانماء يفوز				en	sa	0	0	0
App Store	Alinma-Bank	90f9859d-ee84-4a7b-b91c-cec7cb599633	Its use is very wonderful and easy.	ar	use wonderful easy	Positive	App Store	12/19/22 3:48	حصه محمد ..	12/19/22 3:48	..				en	sa	0	0	0
App Store	Alinma-Bank	6e1d459f-1e8a-40c6-bd85-acb493e15ba2	Excellent application, thank you Alinma.	ar	excellent application thank alinma	Positive	App Store	12/18/22 5:40	7797350	12/18/22 5:40	شكرآ الانماء				en	sa	0	0	0
App Store	Alinma-Bank	221b995d-19ed-4bfd-a91e-a8efd6da651d	The best bank in terms of services. May God bless you.	ar	best bank term service may god bless	Positive	App Store	12/17/22 22:49	mohammad...20	12/17/22 22:49	تقييم خدمه				en	sa	0	0	0
App Store	Alinma-Bank	3149e2e7-cdb7-43bf-bfdd-b388396bc983	Excellent application and great bank.	ar	excellent application great bank	Positive	App Store	12/15/22 22:06	محمد محمد البلوشي	12/15/22 22:06	تطبيق إنماء				en	sa	0	0	0
App Store	Alinma-Bank	9ee36f87-11f7-4b0f-93fa-8d441bd76155	"Now the application is speaking in a fun and easy way."	ar	application speak fun easy way	Positive	App Store	12/14/22 20:26	أبو طلال٨٣	12/14/22 20:26	تحديث				en	sa	0	0	0
App Store	Alinma-Bank	76004f89-09bf-4a4c-aed0-3d13081fc881	One of the most smooth banks and best systems.	ar	one smooth bank best systems	Positive	App Store	12/12/22 16:00	albandariii	12/12/22 16:00	شكرا الإنماء المصرفي				en	sa	0	0	0
App Store	Alinma-Bank	6af23e1a-f25d-4107-b5a0-788cbeced2c2	You are very special.	ar	special	Positive	App Store	12/8/22 17:52	طارق ابو زيزو	12/8/22 17:52	جدة				en	sa	0	0	0
App Store	Alinma-Bank	1ef0e113-6e4d-4df4-985d-9446ecdff4d0	An excellent personal account application, but it would be great if you also develop a business application.	ar	excellent personal account application would great also develop business application	Positive	App Store	12/11/22 17:41	حلول تقني	12/11/22 17:41	ا				en	sa	0	0	0
App Store	Alinma-Bank	e335e509-916d-4364-9a29-96d46c4055e5	Smooth handling is a great advanced technique.	ar	smooth handle great advance technique	Positive	App Store	12/7/22 16:42	أبوعبد الكريم	12/7/22 16:42	افضل مصرف				en	sa	0	0	0
App Store	Alinma-Bank	eb88e7ad-0329-4d95-bb42-d18ffcd9f3ca	Every time I use the app, I love their technology, specifically because they made technology serve them easily without any complications, in addition to the high level of security that makes you feel confident and trustworthy. Greetings with sincere thanks.	ar	every time use app love technology specifically make technology serve easily without complications addition high level security make feel confident trustworthy greetings sincere thank	Positive	App Store	12/5/22 10:39	لاتتعز	12/5/22 10:39	تطبيق الإنماء				en	sa	1	0	0
App Store	Alinma-Bank	d41e245b-d3fa-4d36-a19e-ce56e8b8db8b	At the peak of magnificence.	ar	peak magnificence	Positive	App Store	12/1/22 10:05	ابوبسايل	12/1/22 10:05	قمة الروعة				en	sa	0	0	0
App Store	Alinma-Bank	18fa3574-d2a2-4799-a2a0-5b43fc00fa61	Fast and distinctive service, with a focus on the customer. Al-Rayyan branch, ladies' section, Dammam.	ar	fast distinctive service focus customer alrayyan branch ladies section dammam	Positive	App Store	12/1/22 9:58	بريق الماسه	12/1/22 9:58	خدمة مميزة				en	sa	0	0	0
App Store	Alinma-Bank	34ef0153-e399-4e01-b62e-75352e34e6bf	Honestly, the bank employees take the initiative to serve you and they follow up on you before you even request the service. They are always well-mannered and there isn't one of them who sees themselves as superior. They are always organized and prioritize serving elderly people before younger ones. They are truly amazing, and they treat you like a valued customer or a successful businessman. Any…	ar	honestly bank employees take initiative serve follow even request service always wellmannered isnt one see superior always organize prioritize serve elderly people young ones truly amaze treat like value customer successful businessman anyone go bank impress praise allah truly number one bank	Positive	App Store	11/30/22 17:39	maged456	11/30/22 17:39	عرعر				en	sa	1	0	0
App Store	Alinma-Bank	375819a7-28c8-4810-a510-307abba5e7c6	Her service is amazing, fast, and may God bless her and give her strength. Also, she is always smiling. Banque Alinma, Al-Arqah neighborhood.	ar	service amaze fast may god bless give strength also always smile banque alinma alarqah neighborhood	Positive	App Store	11/30/22 11:14	بسمه العفاري	11/30/22 11:14	الموظفه غاليه العثمان				en	sa	0	0	0
App Store	Alinma-Bank	7c2f0de3-dad6-41d7-b935-81c503bde2ba	"Which bank is the best in terms of dealing? May God bless you."	ar	bank best term deal may god bless	Positive	App Store	11/30/22 10:23	Tarekha999	11/30/22 10:23	RUH				en	sa	0	0	0
App Store	Alinma-Bank	d8dd66eb-1996-4cff-a803-8faa4b36ef85	May God bless you! The application is as good as it can be, thank you from the bottom of my heart. Keep up the great work in providing the best.	ar	may god bless application good thank bottom heart keep great work provide best	Positive	App Store	11/28/22 20:00	malek809	11/28/22 20:00	بنك الانماء				en	sa	1	0	0
App Store	Alinma-Bank	2c5767ec-de7a-4d34-ad38-fa842d31b803	Alinma Bank is very beautiful.	ar	alinma bank beautiful	Positive	App Store	11/24/22 5:16	اشاطري مجنون	11/24/22 5:16	بنك اومصرف جميل جدأ				en	sa	0	0	0
App Store	Alinma-Bank	a8ddcfb5-1f0f-44a8-9321-503d2321a9c5	Yes, the partner.	ar	yes partner	Positive	App Store	11/23/22 13:52	bedo ezz	11/23/22 13:52	نعم الشريك				en	sa	0	0	0
App Store	Alinma-Bank	f6ce7c02-6fee-4cf9-930f-f37054e9a041	"Service above excellent"	ar	service excellent	Positive	App Store	11/20/22 6:37	O Hassan	11/20/22 6:37	تطبيق رائع جداً				en	sa	0	0	0
App Store	Alinma-Bank	9ed8c72d-bc03-4173-9d7b-ff17c09b23db	Thank you for the quality of service, and the future will be even better.	ar	thank quality service future even good	Positive	App Store	11/19/22 15:02	abu hasan 2022	11/19/22 15:02	شكر وعرفان				en	sa	0	0	0
App Store	Alinma-Bank	8869080b-fad4-4c8e-8abc-dd90d70fe02a	Today is the first time I receive a notification about the device authentication service for using the Alinma electronic account. It is a very excellent service. May you be blessed â¤ï¸	ar	today first time receive notification device authentication service use alinma electronic account excellent service may bless	Positive	App Store	11/18/22 14:45	EeAa112233	11/18/22 14:45	..				en	sa	1	0	0
App Store	Alinma-Bank	61c7b936-e633-48a1-aab7-f8a013475ba0	One of the best banks that makes everything easier for you, thank you.	ar	one best bank make everything easy thank	Positive	App Store	11/14/22 11:54	mamaha22	11/14/22 11:54	شكرًا 🫶				en	sa	0	0	0
App Store	Alinma-Bank	ef710c06-6714-464e-b86c-6b2257dfb963	Very excellent and easy to use application.	ar	excellent easy use application	Positive	App Store	11/13/22 17:33	Ibrahim-79	11/13/22 17:33	تطبيق رائع				en	sa	0	0	0
App Store	Alinma-Bank	69a44781-bd94-4f36-b335-107618adfc41	The best bank ever in terms of services, I swear it's innovation.	ar	best bank ever term service swear innovation	Positive	App Store	11/11/22 23:27	abo raàd	11/11/22 23:27	نجران				en	sa	0	0	0
App Store	Alinma-Bank	4cb9986c-5d3e-4140-9295-42a45724af9d	The application is excellent and easy to use.	ar	application excellent easy use	Positive	App Store	10/30/22 11:24	tariq abo ziad	10/30/22 11:24	بنك الإنماء				en	sa	0	0	0
App Store	Alinma-Bank	2014f74a-7d2f-4a4c-8732-f92a0c620ed3	Thank you for the flexibility of the application.	ar	thank flexibility application	Positive	App Store	10/28/22 10:16	الهفتاء🖤	10/28/22 10:16	👏🏻				en	sa	0	0	0
App Store	Alinma-Bank	2b5aa4c0-3e12-498e-ab5e-9fe4c7f26d9c	A wonderful application and a beautiful user experience.	ar	wonderful application beautiful user experience	Positive	App Store	10/26/22 4:37	أبو طيف الخضري	10/26/22 4:37	تجربة المستخدم جميله				en	sa	0	0	0
App Store	Alinma-Bank	7b9f0fd8-7490-4b33-b3de-cbf250732cdd	The bank provides a professional service and the employees are extremely respectful.	ar	bank provide professional service employees extremely respectful	Positive	App Store	10/23/22 23:52	meaoptic	10/23/22 23:52	بنك في غاية الإحترام 🙏🙏🙏				en	sa	1	0	0
App Store	Alinma-Bank	9d3d2698-4e60-49fe-a151-3ce95487fa29	Easy and fast, we look forward to more.	ar	easy fast look forward	Positive	App Store	10/23/22 20:42	OM NAWAF🌹💙💛	10/23/22 20:42	تطبيق جميل				en	sa	0	0	0
App Store	Alinma-Bank	6dd356d0-620d-4f1c-8a32-dc4ee85982d9	He deserves a thousand stars.	ar	deserve thousand star	Positive	App Store	10/21/22 20:31	دانهAl	10/21/22 20:31	بنك الانماء				en	sa	1	0	0
App Store	Alinma-Bank	7bcf469a-e8d2-4500-8aa0-261398b2a770	Thank you very much.	ar	thank much	Positive	App Store	10/19/22 9:00	خمسينيه جميله	10/19/22 9:00	الخرج				en	sa	0	0	0
App Store	Alinma-Bank	71ef3326-23b7-4986-ba9b-2dc834d50603	The application is good to some extent, but it needs development.	ar	application good extent need development	Positive	App Store	10/9/22 4:36	msaalotaibi	10/9/22 4:36	يحتاج تطوير				en	sa	1	0	0
App Store	Alinma-Bank	9bfe76a4-33f2-4461-95b3-9550e3a2bee2	Allah knows which banks I have dealt with are the best, and their application is the most amazing application with their updates constantly being the first to be released.	ar	allah know bank deal best application amaze application update constantly first release	Positive	App Store	9/29/22 16:01	راشدالمري	9/29/22 16:01	نجران				en	sa	0	0	0
App Store	Alinma-Bank	c41a0128-ddc3-4ed1-8e90-003708a927bb	The bank has obtained all the privileges in digital service. Thank you.	ar	bank obtain privilege digital service thank	Positive	App Store	9/29/22 6:27	abohaeh	9/29/22 6:27	رائع				en	sa	1	0	0
App Store	Alinma-Bank	7ef57bea-f88b-4d01-8484-381c483677a4	Thank you, Al Inma Bank. It is very easy and clear in terms of options and task completion.	ar	thank al inma bank easy clear term options task completion	Positive	App Store	9/28/22 10:57	عبدالعزيز&	9/28/22 10:57	سهل وواضح				en	sa	0	0	0
App Store	Alinma-Bank	7c3295e6-34dd-41fd-98ab-8344ce2ffdad	The best.	ar	best	Positive	App Store	9/28/22 8:16	osamaa79	9/28/22 8:16	الرياض				en	sa	0	0	0
App Store	Alinma-Bank	0d1965b5-0fed-4611-be54-c0dbc9a2e7d0	Alinma Bank is one of the best banks available, with great ease, flexibility, and speed, whether through the application, contacting them, or even visiting the branch. I am very grateful to them for this excellent service, sweet manners, and dedication to their work â¥ï¸â¥ï¸	ar	alinma bank one best bank available great ease flexibility speed whether application contact even visit branch grateful excellent service sweet manners dedication work	Positive	App Store	9/23/22 22:24	Vere Good 👏	9/23/22 22:24	مصرف الانماء				en	sa	0	0	0
App Store	Alinma-Bank	8f5f2597-4fee-42e8-9bfd-763916640837	I am completely satisfied. ðððððâï¸âï¸âï¸âï¸âï¸	ar	completely satisfy	Positive	App Store	9/22/22 0:30	ali alatti	9/22/22 0:30	Hafrawi				en	sa	0	0	0
App Store	Alinma-Bank	942f464b-ac6e-49e9-a6e1-83452c60155a	Simple and smooth application, creative â¥ï¸	ar	simple smooth application creative	Positive	App Store	9/21/22 8:50	الله اكبرر 💙	9/21/22 8:50	يعطيكم العافيه اداره وموظفين علي الابداع والاحترافية في التعامل ✅♥️🇸🇦				en	sa	0	0	0
App Store	Alinma-Bank	0a3db22f-5e83-46fc-bc05-9845072bfb11	Truly, a bank like mine with its quick and easy services, I have never regretted, nor have I ever considered needing another bank's ATM.	ar	truly bank like mine quick easy service never regret ever consider need another bank atm	Positive	App Store	9/18/22 15:08	نصر صالح	9/18/22 15:08	البنك المناسب والامثل				en	sa	0	0	0
App Store	Alinma-Bank	315ea281-0609-4500-a0dc-8d0d1ff1478c	A distinguished bank with all the services it offers towards its customers.	ar	distinguish bank service offer towards customers	Positive	App Store	9/14/22 17:47	محمد العريمه	9/14/22 17:47	بريده				en	sa	1	0	0
App Store	Alinma-Bank	66338212-6ad3-4713-99c0-10dff3ce85e4	Smart, easy, and simple bank with no complications.	ar	smart easy simple bank complications	Positive	App Store	9/11/22 20:47	عماد اليامي	9/11/22 20:47	شكرا				en	sa	0	0	0
App Store	Alinma-Bank	0a4113ce-8b0c-47be-86db-08cbb6000509	A beautiful and easy application	ar	beautiful easy application	Positive	App Store	9/12/22 5:26	ahmedkudu	9/12/22 5:26	تطبيق جميل وسهل				en	sa	0	0	0
App Store	Alinma-Bank	6354fc26-0768-4600-a8da-9ec6fc5c93ec	A distinguished bank in all aspects with employees who are sophisticated in their ethics.	ar	distinguish bank aspects employees sophisticate ethics	Positive	App Store	9/11/22 11:43	ابراهيم الغفيري	9/11/22 11:43	مكه				en	sa	1	0	0
App Store	Alinma-Bank	f95ac8a3-9b58-4b5e-9eb7-1d51bd57f7de	Great application, unlike the past when it was difficult.	ar	great application unlike past difficult	Positive	App Store	9/10/22 22:19	ddsdeeddagg	9/10/22 22:19	ممتاز				en	sa	1	0	0
App Store	Alinma-Bank	29f021ae-09e0-4dc5-aacf-26f9a5aae205	The application is good.	ar	application good	Positive	App Store	9/1/22 21:59	Ameen Al-qutairi	9/1/22 21:59	الباحة				en	sa	0	0	0
App Store	Alinma-Bank	ce03d19a-a9b4-4f25-bad4-8547ec75752b	I bear witness with Allah that it is the best and easiest application for all banks. May Allah reward you with all goodness and grant you success.	ar	bear witness allah best easy application bank may allah reward goodness grant success	Positive	App Store	8/26/22 5:03	عشق نوف	8/26/22 5:03	أشهد بالله أنه أفضل البنوك				en	sa	1	0	0
App Store	Alinma-Bank	bc0d15a7-684c-48bc-b3e1-f6a5ffb40ddc	The best bank you can deal with is not like some disgusting banks. With the same card, you can make purchases from abroad without having to open a visa card with them. It is a truly excellent bank, five stars to be exact. If there were more, I would have given it.	ar	best bank deal like disgust bank card make purchase abroad without open visa card truly excellent bank five star exact would give	Positive	App Store	8/25/22 17:47	askmeenz	8/25/22 17:47	افضل بنك				en	sa	1	0	0
App Store	Alinma-Bank	4ce3b887-4739-4921-9668-020f097f4ff6	Efforts are appreciated and thanked.	ar	efforts appreciate thank	Positive	App Store	8/24/22 13:43	ابوراجح1980	8/24/22 13:43	رائع				en	sa	0	0	0
App Store	Alinma-Bank	ad997cbe-69ab-452b-840f-67f2a3f1007f	Sister Noora was wonderful.	ar	sister noora wonderful	Positive	App Store	8/22/22 10:03	Noura1254	8/22/22 10:03	Nour1254				en	sa	0	0	0
App Store	Alinma-Bank	f9aae3ff-092d-402e-a7c1-1155c9444bae	Jabbar Bank and ease of use in the application have made it surpass all other banks. I tip my hat to you.	ar	jabbar bank ease use application make surpass bank tip hat	Positive	App Store	8/18/22 22:19	Brkan505 KSA	8/18/22 22:19	كفو				en	sa	1	0	0
App Store	Alinma-Bank	586a5281-488f-4147-8f78-b473bfd7ed66	A beautiful and easy-to-use application. Thank you, Alinma Bank.	ar	beautiful easytouse application thank alinma bank	Positive	App Store	8/16/22 21:06	محمد بن احمد بازهير	8/16/22 21:06	الرياض				en	sa	0	0	0
App Store	Alinma-Bank	4eb4a9d3-0983-4bb5-8193-34a663114efc	Thank you very much, Bank â¤ï¸	ar	thank much bank	Positive	App Store	8/16/22 13:22	تتتتسالم	8/16/22 13:22	جدة				en	sa	0	0	0
App Store	Alinma-Bank	53fb1aa0-850a-4dc0-8556-cb330c9e2d65	The best bank is Al-Ahli Bank and I am grateful for your presence and for facilitating services and the professionalism of your employees. I am truly happy and grateful for the security service and protection provided by the Al-Inma card. ð	ar	best bank alahli bank grateful presence facilitate service professionalism employees truly happy grateful security service protection provide alinma card	Positive	App Store	8/15/22 19:35	meto love	8/15/22 19:35	يستحق التميز				en	sa	0	0	0
App Store	Alinma-Bank	4eadc7c6-935b-4e4d-b5d7-44cf7b9deec8	Sweet	ar	sweet	Positive	App Store	8/14/22 10:02	GRJ700	8/14/22 10:02	حلو				en	sa	0	0	0
App Store	Alinma-Bank	327c7819-c921-4f1f-999c-f2bda64b3b43	May Allah grant you success and make your affairs easy.	ar	may allah grant success make affairs easy	Positive	App Store	8/12/22 22:35	ⓐⓢⓞⓜ	8/12/22 22:35	وفقكم الله ويسر امركم				en	sa	1	0	0
App Store	Alinma-Bank	787d20ba-d9d6-4445-b634-f06be4e1d90c	The best banking application.	ar	best bank application	Positive	App Store	8/11/22 22:42	Shadi-69	8/11/22 22:42	افضل تطبيق للبنوك				en	sa	0	0	0
App Store	Alinma-Bank	6e26c0aa-be86-4368-8c5d-4dc51976f8f9	The best bank in Saudi Arabia.	ar	best bank saudi arabia	Positive	App Store	8/8/22 9:13	ابوبدر نايف	8/8/22 9:13	‏الرياض				en	sa	0	0	0
App Store	Alinma-Bank	ca48cb75-ce14-468d-8932-98e1ea30d7fa	The service is excellent and fast.	ar	service excellent fast	Positive	App Store	8/7/22 14:12	وعد سلطان	8/7/22 14:12	عميل				en	sa	0	0	0
App Store	Alinma-Bank	3f9a7474-9dae-495a-8695-4208876e8a99	Good bank with excellent services. Its ATMs are modern and advanced, and the customer service is also more than wonderful. The fact that it is one of the banks that makes you feel comfortable when dealing with them is true. Even the decor in the branches makes you feel like you are in your own home, not a bank. Thank you and may Allah bless you. ð¹	ar	good bank excellent service atms modern advance customer service also wonderful fact one bank make feel comfortable deal true even decor branch make feel like home bank thank may allah bless	Positive	App Store	8/7/22 11:50	الباجهجي👊🏼	8/7/22 11:50	BANK AL INMA				en	sa	0	0	0
App Store	Alinma-Bank	06ae7fcf-b34d-42c8-91c0-a55dd7ecce84	Excellent application	ar	excellent application	Positive	App Store	8/6/22 2:34	ام قصي ،،،	8/6/22 2:34	رائع جدا				en	sa	0	0	0
App Store	Alinma-Bank	834685e1-9ca0-4cf2-bb1b-6b63e898cf92	Good app	ar	good app	Positive	App Store	8/6/22 0:36	ahmed alfeky	8/6/22 0:36	تطبيق جيد				en	sa	0	0	0
App Store	Alinma-Bank	b3c586f7-739c-487a-adf7-af24cf5571c4	First time entering the app, honestly it's amazing...!! Winning	ar	first time enter app honestly amaze win	Positive	App Store	8/5/22 21:51	ابو نواف عامر العمرو	8/5/22 21:51	رائع				en	sa	1	0	0
App Store	Alinma-Bank	a97a747f-a456-4dc2-bd2b-16f933c8bd56	Smooth and amazing app! ð	ar	smooth amaze app	Positive	App Store	8/3/22 15:43	Abu Hamas	8/3/22 15:43	رائع				en	sa	0	0	0
App Store	Alinma-Bank	680b7d89-9735-406c-8397-6ab1d60f36bf	Thank you for the beautiful application. May Allah bless you. Keep up the good work. If you make the font more user-friendly, it will be even more beautiful.	ar	thank beautiful application may allah bless keep good work make font userfriendly even beautiful	Positive	App Store	8/4/22 2:29	جهاد الأطباء	8/4/22 2:29	الصلاة على النبي				en	sa	1	0	0
App Store	Alinma-Bank	bbe07607-9864-4dac-bd0e-512bbd2213a1	One of the most beautiful banking applications and easy to use. Alinma Bank is always developing the application and every update is better than the previous version. I salute the person responsible for developing the applications at Alinma.	ar	one beautiful bank applications easy use alinma bank always develop application every update good previous version salute person responsible develop applications alinma	Positive	App Store	8/2/22 10:26	Bobanaja	8/2/22 10:26	جميل جدا وعملي وبسيط				en	sa	0	0	0
App Store	Alinma-Bank	f9564ad7-4f43-41e5-a7f8-b3c47e183381	The best application and easy to use.	ar	best application easy use	Positive	App Store	7/31/22 22:49	آبو بسام	7/31/22 22:49	جميل				en	sa	0	0	0
App Store	Alinma-Bank	9e4938be-4ce3-434c-bcee-2e60c963f4a6	Excellent, thank you.	ar	excellent thank	Positive	App Store	7/31/22 19:36	ahhamad	7/31/22 19:36	متميز				en	sa	0	0	0
App Store	Alinma-Bank	38ead245-7a46-4ad1-8c8c-f0591c7b7b31	The fastest and best banking application I have ever dealt with ðð¹ððð»ð¹	ar	fast best bank application ever deal	Positive	App Store	7/30/22 7:26	💋💋❤️❤️💋	7/30/22 7:26	اسرع و افضل تطبيق بنك تعاملت معه 😍				en	sa	0	0	0
App Store	Alinma-Bank	47a92ae6-ca95-42c7-876e-3d70e2ef258e	I thank Sheikhah Walid Sennal. She was very smooth and patient.	ar	thank sheikhah walid sennal smooth patient	Positive	App Store	7/30/22 11:38	عهد مس	7/30/22 11:38	حي العارض				en	sa	0	0	0
App Store	Alinma-Bank	3ca262b4-f879-4047-ab78-01683bd776b3	One of the best banks, by God, and ease of dealing. The self-service system is fully integrated, Mashallah.	ar	one best bank god ease deal selfservice system fully integrate mashallah	Positive	App Store	7/29/22 0:50	Aboodi19900	7/29/22 0:50	مراجعة				en	sa	0	0	0
App Store	Alinma-Bank	dbdd5453-395a-4ea4-96fe-09358b08179d	The application is amazing and the new addition today is the traveler visa. Also, I added more currencies for free. ðððâ¤ï¸	ar	application amaze new addition today traveler visa also add currencies free	Positive	App Store	7/27/22 12:57	Mehs08	7/27/22 12:57	تقيمي				en	sa	0	1	0
App Store	Alinma-Bank	919f417a-e867-4614-bdbb-b9881c62e94a	"I hope the program is updated with more advanced technology."	ar	hope program update advance technology	Positive	App Store	7/22/22 18:14	amani1522	7/22/22 18:14	تحديث				en	sa	1	0	0
App Store	Alinma-Bank	4649bc24-d7b0-41ea-b944-3e45c4e925e6	An easy and practical application, even on the day you open an account, everything is easy, clear, and ready, which is unlike all the other banking applications that I have struggled with. Thank you for your application!	ar	easy practical application even day open account everything easy clear ready unlike bank applications struggle thank application	Positive	App Store	7/12/22 21:34	bengo!	7/12/22 21:34	تطبيق جميل!				en	sa	0	0	0
App Store	Alinma-Bank	3a48dfd9-ce14-456c-9dfc-43c9928634d0	Thank you for this excellence.	ar	thank excellence	Positive	App Store	7/10/22 7:18	yahyahafsan	7/10/22 7:18	جدة الفريدة				en	sa	0	0	0
App Store	Alinma-Bank	e6cb5658-1461-4dd3-abca-7c5b08d893b8	"An easy and fast application.. Beautiful like the bank that made it ð«°ð»"	ar	easy fast application beautiful like bank make	Positive	App Store	7/9/22 23:54	مُبهمـه	7/9/22 23:54	عهود آل زيدان				en	sa	0	0	0
App Store	Alinma-Bank	51b4544d-b5cf-4f4c-9349-20586a6dd485	Easy to use with excellent services. Everything is clear and simplified. One of the best banking applications compared to other banks. Thank you, Alinma Bank, and may you continue to succeed, God willing.	ar	easy use excellent service everything clear simplify one best bank applications compare bank thank alinma bank may continue succeed god will	Positive	App Store	7/7/22 8:55	فهد علي محمد هزازي	7/7/22 8:55	جازان احد المسارحه				en	sa	0	0	0
App Store	Alinma-Bank	010bc6d8-f562-4d8c-b2ce-5751e9d1c692	I would like to thank the manager of the Makkah branch of Alinma Bank, Ms. Fatima Bamnadir, for her excellent and professional service in dealing with the customer. I would also like to thank the employee, Ms. Rabab Filban, for her excellent handling and speed in completing tasks. Thank you, Alinma Bank.	ar	would like thank manager makkah branch alinma bank ms fatima bamnadir excellent professional service deal customer would also like thank employee ms rabab filban excellent handle speed complete task thank alinma bank	Positive	App Store	7/6/22 17:51	أسماء 1900	7/6/22 17:51	فرع مكه المكرمة				en	sa	0	0	0
App Store	Alinma-Bank	4c039a93-867e-4953-b2c3-ae182774bd2f	Easy-to-use application And clarity of all steps	ar	easytouse application clarity step	Positive	App Store	7/5/22 9:34	@azeez19	7/5/22 9:34	تطبيق المصرف				en	sa	0	0	0
App Store	Alinma-Bank	22a22512-f9d9-40e7-a9aa-f1bf8b4f63ea	One of the most sophisticated, beautiful, and excellent banks in the Kingdom in terms of service, treatment, and speed. Thank you very much.	ar	one sophisticate beautiful excellent bank kingdom term service treatment speed thank much	Positive	App Store	7/4/22 13:38	صوت الحق ٢٠٣٠	7/4/22 13:38	من ارقى واجمل واروع البنوك في المملكه تعامل وخدمه وسرعه واخلاق عاليه				en	sa	0	0	0
App Store	Alinma-Bank	f33c2aca-99ed-44e5-8b18-a3faa4d30d17	Thank you Alinma Bank for the services you provide.	ar	thank alinma bank service provide	Positive	App Store	7/2/22 2:20	Bbelba2	7/2/22 2:20	خدمة اكثر من ممتازة				en	sa	0	0	0
App Store	Alinma-Bank	e40885d1-7919-41b8-b7a9-5eec4d4ffc45	Excellent application and no problems ðð¼ðð¼ The best bank in terms of services, especially dealing with customers.	ar	excellent application problems best bank term service especially deal customers	Positive	App Store	7/1/22 19:58	Eboo..	7/1/22 19:58	Best bank in KSA				en	sa	1	0	0
App Store	Alinma-Bank	9a0b56e7-004a-49cd-9551-18d759ee0a35	"A wonderful bank and an even better application. Through my experience and dealings with this bank, whether using its services through the application or going to the branch and interacting with the employees there, with their friendliness and love for serving customers, I am soon planning to transfer my salary to this great institution."	ar	wonderful bank even good application experience dealings bank whether use service application go branch interact employees friendliness love serve customers soon plan transfer salary great institution	Positive	App Store	7/1/22 7:48	مساعد الغشام	7/1/22 7:48	القصيم / عنيزة				en	sa	1	0	0
App Store	Alinma-Bank	edc516e6-cf4a-42d5-b88f-e123ccceff33	Very beautiful.	ar	beautiful	Positive	App Store	6/25/22 8:35	ameennnn	6/25/22 8:35	جميل				en	sa	0	0	0
App Store	Alinma-Bank	8623d3c6-dcf5-4eb2-9535-12eceea1652e	The electronic services at the bank are excellent. There is ease in navigating between services with speed and fluidity in querying about the services. Keep up the good work and may God grant you success.	ar	electronic service bank excellent ease navigate service speed fluidity query service keep good work may god grant success	Positive	App Store	6/24/22 13:35	ا.ابو حسن	6/24/22 13:35	ينبع الصناعية_حي النخيل_ش.العنبرة_م2_م2				en	sa	1	0	0
App Store	Alinma-Bank	5fc3f1c7-950f-4236-8e87-ee65f00d83fc	High quality and clarity application	ar	high quality clarity application	Positive	App Store	6/20/22 13:26	نائف المداري	6/20/22 13:26	افضل تطبيق				en	sa	0	0	0
App Store	Alinma-Bank	55340f25-7c0a-4aa1-be4a-0f9f42aaebb6	Excellent services	ar	excellent service	Positive	App Store	6/17/22 16:32	Saeed Mulfi	6/17/22 16:32	شكراً				en	sa	0	0	0
App Store	Alinma-Bank	66da85e5-63c0-4c89-b9c7-614cbd9ee4a1	May Allah strengthen you and give you good health.	ar	may allah strengthen give good health	Positive	App Store	6/16/22 12:59	لخيتعوش	6/16/22 12:59	الله يقويكم ويعطيكم العافيه				en	sa	1	0	0
App Store	Alinma-Bank	f3bc3c1e-f3c5-40ee-8a30-bf5a01cb1f2a	With sincere thanks.	ar	sincere thank	Positive	App Store	6/12/22 1:42	النسمة العليلة	6/12/22 1:42	تطبيق قيم.				en	sa	0	0	0
App Store	Alinma-Bank	277336aa-decf-4a7b-889e-0e9f2335381c	Peace be upon you, Your services are excellent. However, I have an investment account that I am unable to operate on the application. Regards.	ar	peace upon service excellent however investment account unable operate application regard	Positive	App Store	6/11/22 3:05	king19788	6/11/22 3:05	الرياض ظهرة لبن				en	sa	1	0	0
App Store	Alinma-Bank	9901795f-61d4-42f7-8d1c-6ca4f3aaf163	Bank Alinma is always distinguished	ar	bank alinma always distinguish	Positive	App Store	6/9/22 7:11	عماد العماد	6/9/22 7:11	مشاء الله خدمات متميزه				en	sa	1	0	0
App Store	Alinma-Bank	b2e51f3d-fa37-4c06-84ae-618eae7c6b7e	I thank the Alinma Bank in Makkah Al-Mukarramah, Al Awali branch, represented by its manager Mr. Abdulwahab Al-Zahrani and Mr. Ibrahim Bazeed for their exceptionally good manners and excellent treatment. I express my utmost gratitude to you.	ar	thank alinma bank makkah almukarramah al awali branch represent manager mr abdulwahab alzahrani mr ibrahim bazeed exceptionally good manners excellent treatment express utmost gratitude	Positive	App Store	6/7/22 10:53	ابوفيصل١٩٧٩٧٩	6/7/22 10:53	اشكر مصرف الانماء بمكة المكرمة				en	sa	0	0	0
App Store	Alinma-Bank	8392ca41-6198-4e44-b05d-a488a0cf610c	I request an update for the better.	ar	request update good	Positive	App Store	6/7/22 4:19	Moath1012	6/7/22 4:19	السعوديه				en	sa	1	0	0
App Store	Alinma-Bank	ff606d37-d92a-4c39-9484-292d3bfaee2a	One of the best banks I have dealt with, their employees have good ethics and their applications are among the best and easiest. I always recommend them to everyone, by Allah.	ar	one best bank deal employees good ethics applications among best easy always recommend everyone allah	Positive	App Store	6/6/22 11:09	فغيره	6/6/22 11:09	A				en	sa	0	0	0
App Store	Alinma-Bank	8bee2ac0-4a36-4334-b7fe-3bf964641ff5	The best bank currently.	ar	best bank currently	Positive	App Store	6/4/22 8:09	m112aa	6/4/22 8:09	تقيم				en	sa	0	0	0
App Store	Alinma-Bank	d2653e4a-285c-4594-9af8-e57e27122583	One of the best Saudi banks with full honesty.	ar	one best saudi bank full honesty	Positive	App Store	6/1/22 15:59	سيرجي تولكونوف	6/1/22 15:59	شكراً لكم				en	sa	0	0	0
App Store	Alinma-Bank	b2b2ae57-030f-4cf9-9507-61c94c478acc	Al Inma Bank and the Al Inma Bank's application offer one of the best services in everything.	ar	al inma bank al inma bank application offer one best service everything	Positive	App Store	5/30/22 11:16	djprwhcudcbvdf2799	5/30/22 11:16	مصرف الإنماء وتطيبق مصرف الإنماء				en	sa	0	0	0
App Store	Alinma-Bank	5272c1e9-4d65-45c0-806b-7a0faafba628	Please update and enhance the application system of Alinma Bank, following the example of Al Rajhi Bank's application, for its ease and aesthetic appeal. Thank you.	ar	please update enhance application system alinma bank follow example al rajhi bank application ease aesthetic appeal thank	Positive	App Store	5/31/22 19:02	بنت روق@@@	5/31/22 19:02	مراجعة				en	sa	1	0	0
App Store	Alinma-Bank	681cf6ef-2546-4382-8af1-32fe79f52a67	Excellent application deserving five stars.	ar	excellent application deserve five star	Positive	App Store	5/26/22 6:44	رعد ٢٠٠٥	5/26/22 6:44	تطبيق ممتاز				en	sa	0	0	0
App Store	Alinma-Bank	cad86d82-377a-4edc-94c7-593762c9b21d	One of the best local banks One of the best services provided by the company Good luck.	ar	one best local bank one best service provide company good luck	Positive	App Store	5/27/22 21:30	ainma bank	5/27/22 21:30	Bankalyenma				en	sa	0	0	0
App Store	Alinma-Bank	e238af3f-cf6a-41c9-8bf7-73dc794ca3de	Easy and excellent application.	ar	easy excellent application	Positive	App Store	5/25/22 3:23	abo bassam z	5/25/22 3:23	شكرًا				en	sa	0	0	0
App Store	Alinma-Bank	a075a1eb-e1bc-4a0c-83b4-5f50b1ce6f5d	Creativity, mashAllah.	ar	creativity mashallah	Positive	App Store	5/23/22 13:31	honeesh	5/23/22 13:31	جدة				en	sa	0	0	0
App Store	Alinma-Bank	90c3a925-7c86-4cd4-bd5d-f923abccd34c	One of the best and easiest banks through electronic applications.	ar	one best easy bank electronic applications	Positive	App Store	5/19/22 17:08	فيصل ١٤	5/19/22 17:08	افضل بنك				en	sa	0	0	0
App Store	Alinma-Bank	a5fd02a8-1c67-4132-9069-be4013c0d36a	A very beautiful and easy to use application that provides all the services I need. I no longer have to visit the branch as I can complete all my services through the app. It is very clear and there are no difficulties. Thank you, Alinma Bank.	ar	beautiful easy use application provide service need long visit branch complete service app clear difficulties thank alinma bank	Positive	App Store	5/16/22 0:44	mn9.g	5/16/22 0:44	افضل تطبيق لمصرف الانماء				en	sa	1	0	0
App Store	Alinma-Bank	0f9901c3-0979-4b57-a939-8c6636940fef	Banking procedures are very easy and smooth. Thank you.	ar	bank procedures easy smooth thank	Positive	App Store	5/14/22 4:01	ابو حاااتم	5/14/22 4:01	السلام عليكم				en	sa	0	0	0
App Store	Alinma-Bank	010ac05c-c1fc-4197-84c7-8b381d390448	A professional bank with excellent customer service, taking care of your matters quickly.	ar	professional bank excellent customer service take care matter quickly	Positive	App Store	5/10/22 18:23	بذرة خير ✨	5/10/22 18:23	عبدالله				en	sa	0	0	0
App Store	Alinma-Bank	fae0fa6a-8345-4fdf-8615-60a01517b757	The services of the Inmaa application are honestly excellent.	ar	service inmaa application honestly excellent	Positive	App Store	5/6/22 9:35	DR.SWEET❤️	5/6/22 9:35	تقيم				en	sa	0	0	0
App Store	Alinma-Bank	50e66b1e-5f8f-4030-b8d6-0d720b5dc40e	The best bank in its transactions, even the application is user-friendly.	ar	best bank transactions even application userfriendly	Positive	App Store	4/29/22 5:35	بلاش وً	4/29/22 5:35	افضل بنك فى تعاملاته حتى التطبيق سهل التعامل				en	sa	1	0	0
App Store	Alinma-Bank	ffbfc273-1c70-4137-9f3a-e3138169fa37	Alinma Bank is one of the best Saudi banks, and they are continuously developing. Thank you, Alinma.	ar	alinma bank one best saudi bank continuously develop thank alinma	Positive	App Store	4/28/22 4:21	ابوخراش	4/28/22 4:21	افضل بنك				en	sa	0	0	0
App Store	Alinma-Bank	16bce04e-c3d1-49cb-9546-94ebf3e4a9c4	A very luxurious and upscale bank.	ar	luxurious upscale bank	Positive	App Store	4/28/22 4:02	saflkgg	4/28/22 4:02	بنك الانماء				en	sa	1	0	0
App Store	Alinma-Bank	d62e4db3-d507-4010-a60a-b42dee2ee30c	A great application and a distinguished bank in terms of dealing, speed, efficiency, and accuracy.	ar	great application distinguish bank term deal speed efficiency accuracy	Positive	App Store	4/28/22 2:29	اياروعرعرغرغر	4/28/22 2:29	مميزين				en	sa	1	0	0
App Store	Alinma-Bank	1bf764b9-0e0d-4cca-a337-8e0d761f99bc	The application is excellent and very smooth... After the latest update, it got stuck and wouldn't open. I deleted it and downloaded it again, and everything is fine now. ðð»ð·	ar	application excellent smooth late update get stick wouldnt open delete download everything fine	Positive	App Store	4/28/22 1:51	Taraf..	4/28/22 1:51	التحديث الجديد				en	sa	0	1	1
App Store	Alinma-Bank	9d17150f-e25e-4a6d-86e2-884aa4ec43d2	Thank you very much. One of the best and most beautiful applications ð¹ð	ar	thank much one best beautiful applications	Positive	App Store	4/27/22 0:04	بندر البشر	4/27/22 0:04	الرياض				en	sa	0	0	0
App Store	Alinma-Bank	d2c81ab2-d631-4ee2-856b-f34e975655d3	There are no problems with the comments, the transfers are always excellent.	ar	problems comment transfer always excellent	Positive	App Store	4/26/22 7:57	بنت ابوها😂	4/26/22 7:57	اجمل خدمه				en	sa	0	1	0
App Store	Alinma-Bank	6255a51b-afb9-44ee-b68e-4714558d345c	May Allah grant you success	ar	may allah grant success	Positive	App Store	4/25/22 22:52	astarios	4/25/22 22:52	انتم رائعون				en	sa	1	0	0
App Store	Alinma-Bank	de8a49bc-bb8d-4c92-867c-2edf3626b625	Masha'Allah, blessed be God, glory be to God.	ar	mashaallah bless god glory god	Positive	App Store	4/25/22 22:29	لم اجربه بعد!	4/25/22 22:29	تطبيق جميل				en	sa	1	0	0
App Store	Alinma-Bank	514080bf-86dc-48b7-b72d-06b73d1038ea	"Alhamdulillah, who has made this available to us."	ar	alhamdulillah make available us	Positive	App Store	4/24/22 22:56	محمد الجليل	4/24/22 22:56	شكراً				en	sa	0	1	0
App Store	Alinma-Bank	ebca4b30-ab28-4e63-a742-fa7cc56fa6c7	Excellent, may Allah bless you.	ar	excellent may allah bless	Positive	App Store	4/24/22 5:33	مساعد الرومي	4/24/22 5:33	شكر				en	sa	1	0	0
App Store	Alinma-Bank	aca35d0b-8ffb-433a-8a89-6d87f62e9d02	The best banking application and services in the entire Kingdom of Saudi Arabia without competition, even those who seem to be senior shrink in front of the stature of this giant. May Allah protect and always grant you success and leadership. You are truly amazing. Thank you very much and may Allah reward you with all the best. A thousand thanks.	ar	best bank application service entire kingdom saudi arabia without competition even seem senior shrink front stature giant may allah protect always grant success leadership truly amaze thank much may allah reward best thousand thank	Positive	App Store	4/23/22 1:58	Almuataz	4/23/22 1:58	أفضل تطبيق وخدمات بنكية علي عموم المملكة العربية السعودية بلا منافس من اي بنك قزم				en	sa	1	0	0
App Store	Alinma-Bank	b0e25464-164b-4093-ac45-4488d9b61558	"The Alinma Bank application is excellent. May Allah bless you with what He loves and accepts."	ar	alinma bank application excellent may allah bless love accept	Positive	App Store	4/18/22 1:11	THA7EB	4/18/22 1:11	تطبيق ممتاز				en	sa	1	0	0
App Store	Alinma-Bank	38bcd7ab-147a-4460-a74d-003bf84232e6	The most beautiful bank I have seen in my life is the management and staff. The management, Hanan Al-Fawzan and before her, Haifa Al-Shamri, are wonderful directors, and the staff are wonderful as well with their morals. I congratulate Alinma Bank in Hail for their employees, both women and men. It is the most beautiful bank I have dealt with.	ar	beautiful bank see life management staff management hanan alfawzan haifa alshamri wonderful directors staff wonderful well morals congratulate alinma bank hail employees women men beautiful bank deal	Positive	App Store	4/17/22 0:22	💃💃حصوص	4/17/22 0:22	حائل				en	sa	1	0	0
App Store	Alinma-Bank	155ab023-84d4-47c2-a10a-2fa76d87ac05	Easy.	ar	easy	Positive	App Store	4/15/22 18:50	نوف2580	4/15/22 18:50	سهل				en	sa	0	0	0
App Store	Alinma-Bank	5b75bd2d-50d6-432c-b93b-99ba580334e6	"The program is very easy, fast, and contains all the services. Thank you ðð"	ar	program easy fast contain service thank	Positive	App Store	4/14/22 22:39	JuicyAlhsdyosy	4/14/22 22:39	خدمة				en	sa	0	0	0
App Store	Alinma-Bank	ffad3362-b576-4f14-822f-3646ed7a6130	Easy, beautiful, and good.	ar	easy beautiful good	Positive	App Store	4/13/22 12:08	استاهلك	4/13/22 12:08	جميل				en	sa	0	0	0
App Store	Alinma-Bank	89f865aa-fad3-4c71-b45a-67409953cbe7	One of the best banks.	ar	one best bank	Positive	App Store	4/13/22 6:11	raeeed911	4/13/22 6:11	جميل				en	sa	0	0	0
App Store	Alinma-Bank	d0ff9f8c-44dc-4831-a070-28ae2d5f51ac	Excellent, from the best to the best.	ar	excellent best best	Positive	App Store	4/12/22 19:15	أبو اشذ	4/12/22 19:15	تقييم				en	sa	0	0	0
App Store	Alinma-Bank	fc8544ae-597d-4b8c-89e3-058807010190	The best bank in terms of service and electronic services. May your efforts be blessed.	ar	best bank term service electronic service may efforts bless	Positive	App Store	4/10/22 19:00	Amani A Aladwan	4/10/22 19:00	أفضل بنك				en	sa	0	0	0
App Store	Alinma-Bank	69a4ae26-3ec0-4b86-bd92-2c2aff49599b	Excellent very much	ar	excellent much	Positive	App Store	4/6/22 23:59	khougli	4/6/22 23:59	الرياض				en	sa	0	0	0
App Store	Alinma-Bank	600f7849-485b-4fcc-90e8-ef5f183469c0	Excellent service in every sense of the word.	ar	excellent service every sense word	Positive	App Store	4/6/22 20:17	هلالية الفخر	4/6/22 20:17	احب بنك الانماء لتميزة المستمر .				en	sa	0	0	0
App Store	Alinma-Bank	ca4b2d10-95c1-4ce6-9154-5519ced7529b	One of the best service banks in the kingdom.	ar	one best service bank kingdom	Positive	App Store	4/6/22 10:13	مجدي الجماعي	4/6/22 10:13	الرياض				en	sa	0	0	0
App Store	Alinma-Bank	f3b70ceb-5e51-48fb-b09c-6cb9f3ad1f24	Thank you, Alinma Bank, for the exceptional and fast services.	ar	thank alinma bank exceptional fast service	Positive	App Store	4/4/22 15:03	assssdddddddddfff	4/4/22 15:03	شكرا مصرف الانماء على الخدمة المميزه				en	sa	0	0	0
App Store	Alinma-Bank	01e79c98-7e9b-4cf5-ad9c-0833945f427c	"One of the easiest things I have seen and a beautiful and wonderful application."	ar	one easy things see beautiful wonderful application	Positive	App Store	3/29/22 11:29	ابو بدرية	3/29/22 11:29	فدك				en	sa	0	0	0
App Store	Alinma-Bank	27fdec5e-43f6-4de0-b3d7-569cdd7c9e7e	There is a need for better development than what is currently available. Other local bank applications are still much better. External transfers are still far behind other banks, and currency conversion rates are very high compared to other banks and not constantly updated. We hope to see you at the top, God willing. Good luck and a good start, but you have a long journey ahead.	ar	need good development currently available local bank applications still much good external transfer still far behind bank currency conversion rat high compare bank constantly update hope see top god will good luck good start long journey ahead	Positive	App Store	3/30/22 6:11	khaled66m	3/30/22 6:11	يحتاج تطوير				en	sa	1	0	0
App Store	Alinma-Bank	226115b0-07e7-4824-9ccb-4f93a057c716	One of the best banking programs in terms of ease of use, speed, and service quality.	ar	one best bank program term ease use speed service quality	Positive	App Store	3/29/22 7:57	golden boy 333	3/29/22 7:57	الدمام				en	sa	0	0	0
App Store	Alinma-Bank	52c4862f-f628-45d8-ac3e-2f1b732ec4be	One of the best banks I have dealt with, and the application is very excellent and easy to use. It serves you quickly and efficiently. Thank you very much.	ar	one best bank deal application excellent easy use serve quickly efficiently thank much	Positive	App Store	3/27/22 11:21	Anas alamri	3/27/22 11:21	افضل تطبيق وافضل بنك				en	sa	0	0	0
App Store	Alinma-Bank	00e69499-4377-47c5-ae63-1f38b8c8091c	The best bank is Alinma Bank and its application.	ar	best bank alinma bank application	Positive	App Store	3/27/22 10:15	الشهراني 07	3/27/22 10:15	علي الشهراني				en	sa	0	0	0
App Store	Alinma-Bank	b095ec2f-23e2-4fce-a00a-d4161d4cc9f4	The best bank I can deal with.	ar	best bank deal	Positive	App Store	3/25/22 22:18	سحر نواف	3/25/22 22:18	افضل بنك				en	sa	0	0	0
App Store	Alinma-Bank	8e220464-e28a-448b-b917-df7be9b93536	I love you all and I love Alinma Bank. I wish to work with you, even though I am currently employed in another bank.	ar	love love alinma bank wish work even though currently employ another bank	Positive	App Store	3/24/22 20:40	نوفا الحلوه الهنوف	3/24/22 20:40	ملاحظاتي				en	sa	1	0	0
App Store	Alinma-Bank	b7cd914c-09c7-432d-94ad-d2716a0cd685	Masha Allah, excellent service and ease of use in the system. I would like to extend a special thank you to the Eastern Nasim branch in Riyadh and all its employees. Wishing you all a blessed Ramadan.	ar	masha allah excellent service ease use system would like extend special thank eastern nasim branch riyadh employees wish bless ramadan	Positive	App Store	3/24/22 16:39	sultan🇸🇦	3/24/22 16:39	شكر				en	sa	0	0	0
App Store	Alinma-Bank	0a260771-98b4-447a-acf4-3c4e614842c2	A decent application, but we aspire to more of your innovations.	ar	decent application aspire innovations	Positive	App Store	3/22/22 14:48	sultan althu	3/22/22 14:48	تطبيق جيد				en	sa	1	0	0
App Store	Alinma-Bank	a78922a2-9692-4d4d-a4cb-2b21da719bdf	"A great bank with fantastic electronic banking services in every sense of the word."	ar	great bank fantastic electronic bank service every sense word	Positive	App Store	3/18/22 19:50	عميل الكتروني	3/18/22 19:50	Saad				en	sa	0	0	0
App Store	Alinma-Bank	7ede2332-e9cf-4217-be66-ecfc8126973c	Your banking services are excellent and almost error-free with a rate of 90%. However, if you could focus on and try to improve the interface of the application to make it easier and faster for personal use in accessing and conducting banking transactions.	ar	bank service excellent almost errorfree rate however could focus try improve interface application make easy fast personal use access conduct bank transactions	Positive	App Store	3/20/22 8:41	HassanFaifi	3/20/22 8:41	اقتراح				en	sa	1	1	0
App Store	Alinma-Bank	d4e3241b-6e25-4c28-bc28-6f4cf2b84c60	And thanks for its successful management.	ar	thank successful management	Positive	App Store	3/17/22 15:16	bu' nayef	3/17/22 15:16	اسهل تعامل واكثر البنوك احتراما لعملائه اتمنى المستقبل الناجح لجميع منسوبيه				en	sa	0	0	0
App Store	Alinma-Bank	34d30663-ae47-4d6e-9485-6624e11a1a8d	This bank is excellent in welcoming and serving customers with complete dedication and excellence.	ar	bank excellent welcome serve customers complete dedication excellence	Positive	App Store	3/13/22 16:58	اعلانات بعد كل هدف	3/13/22 16:58	انماء				en	sa	0	0	0
App Store	Alinma-Bank	95890e40-9b94-4acb-9a7b-fdd3729dda43	It would be great if sub-accounts can be reordered to appear in the specific order chosen by the user and saved.	ar	would great subaccounts reorder appear specific order choose user save	Positive	App Store	3/15/22 5:42	Mohammed 981	3/15/22 5:42	مقترح للتطوير				en	sa	1	1	0
App Store	Alinma-Bank	0c76715e-e7fe-4bde-998e-f7ccd924b4b2	Clear and easy Their application makes it convenient for you.	ar	clear easy application make convenient	Positive	App Store	3/12/22 8:12	ام ديفيد	3/12/22 8:12	Amal Mousa				en	sa	0	0	0
App Store	Alinma-Bank	def9bc31-0dc7-4795-8d4a-518880307291	The application is very lightweight and easy, unlike other complicated banking applications with many menu bars. However, I hope that Bank Alinma will send us information about the companies qualified to enter the Saudi market. Thank you.	ar	application lightweight easy unlike complicate bank applications many menu bar however hope bank alinma send us information company qualify enter saudi market thank	Positive	App Store	3/10/22 9:07	حسام احمد ١٥٥	3/10/22 9:07	تطبيق خفيف الاستخدام				en	sa	1	0	0
App Store	Alinma-Bank	c2391ca6-5fbd-4b72-b927-a25a1f85ac24	The transfer was made to my accounts in other local banks in less than two minutes. Thank you Alinma Bank. You are the best without a doubt.	ar	transfer make account local bank less two minutes thank alinma bank best without doubt	Positive	App Store	3/9/22 16:31	parfum lover	3/9/22 16:31	👍🏻👍🏻انجاز سريع				en	sa	0	0	0
App Store	Alinma-Bank	535b612e-7b20-4bea-b95f-1212ebfc16a4	The best exchange and the best service from the automated response. Thank you, Anima Bank, and thank you, Anima employees.	ar	best exchange best service automate response thank anima bank thank anima employees	Positive	App Store	3/7/22 6:43	XM.9777	3/7/22 6:43	الدمام				en	sa	0	0	0
App Store	Alinma-Bank	68457133-5bb2-4583-ad92-de39376c58e4	Their interaction at the branches is the same as your interaction, and the ease of service within the application is excellent. Their rating is very high. I thank the Bank Alinma for their care in selecting employees.	ar	interaction branch interaction ease service within application excellent rat high thank bank alinma care select employees	Positive	App Store	3/6/22 13:14	سلطان قحطان	3/6/22 13:14	شكراً				en	sa	0	0	0
App Store	Alinma-Bank	b3619de3-8204-4023-9182-e05d822f886e	Honestly, you guys are one of the best banks to deal with.	ar	honestly guy one best bank deal	Positive	App Store	3/6/22 8:29	السبيعب	3/6/22 8:29	بنك الانماء				en	sa	0	0	0
App Store	Alinma-Bank	a68b19a8-6420-4b47-90d4-130fd03f8254	"Amazing and high-quality services, honestly, I thank you."	ar	amaze highquality service honestly thank	Positive	App Store	3/4/22 15:48	Muklid	3/4/22 15:48	روووووووعه				en	sa	0	0	0
App Store	Alinma-Bank	cf31fcbc-da71-4ccc-8a05-6aad250ad38d	Thank you from the bottom of my heart. It is very easy and safe.	ar	thank bottom heart easy safe	Positive	App Store	3/3/22 6:41	سرعة. التفعيل	3/3/22 6:41	شكرًا				en	sa	0	0	0
App Store	Alinma-Bank	970e261d-354d-4be6-904a-839c46e0441a	The best bank, honestly. May God bless you and make you happy for your wonderful services. ð¤²ð»â¥ï¸	ar	best bank honestly may god bless make happy wonderful service	Positive	App Store	3/2/22 15:11	فواز الاسمري	3/2/22 15:11	شكراً				en	sa	0	0	0
App Store	Alinma-Bank	b2bbb681-d90c-49e4-95f2-4fb6aa91cded	Keep going, champion.	ar	keep go champion	Positive	App Store	2/16/22 8:15	خ ٥٠٧	2/16/22 8:15	إلى الأمام ي بطل				en	sa	0	0	0
App Store	Alinma-Bank	8b0ef5d7-368d-49f0-af9d-da90aae569d3	The employee Abdulmajeed AlHanaki is a distinguished employee and has high abilities.	ar	employee abdulmajeed alhanaki distinguish employee high abilities	Positive	App Store	2/12/22 3:13	عبدالعزيز الزميع	2/12/22 3:13	شكراً للموظف				en	sa	1	0	0
App Store	Alinma-Bank	e33a750d-89c3-48c9-ba83-6552039b9a9b	"Masha Allah, excellent always in updating and following up."	ar	masha allah excellent always update follow	Positive	App Store	2/8/22 8:53	temo7o7	2/8/22 8:53	ممتاز دائما				en	sa	1	0	0
App Store	Alinma-Bank	78605f2d-f193-4e8c-a746-c51e609d62a8	I love you, the best bank.	ar	love best bank	Positive	App Store	2/3/22 10:59	Ahlam199	2/3/22 10:59	الشرقية-الظهران				en	sa	0	0	0
App Store	Alinma-Bank	2fcd1786-ca41-4218-a84e-5b56234d4d80	An excellent, very fast, and smooth application.	ar	excellent fast smooth application	Positive	App Store	1/31/22 11:51	aburodina	1/31/22 11:51	الظهران				en	sa	0	0	0
App Store	Alinma-Bank	3b1d0cbc-f88a-4f56-94c6-5f14cad04872	Alinma Bank, all your services, electronic or otherwise, are convenient and excellent. Thank you.	ar	alinma bank service electronic otherwise convenient excellent thank	Positive	App Store	1/29/22 22:59	ابوأسامة الجوفي	1/29/22 22:59	السلام عليكم				en	sa	1	0	0
App Store	Alinma-Bank	2695a754-4dbf-4446-a3a1-6b137428fc94	Good service	ar	good service	Positive	App Store	1/28/22 12:47	عاشقه الرمانسيه	1/28/22 12:47	روعه				en	sa	0	0	0
App Store	Alinma-Bank	0f31d78b-1a97-4c7d-9c62-8a05f1e0879a	Significant improvement.	ar	significant improvement	Positive	App Store	1/27/22 17:07	أبوماجد ابن هويدي	1/27/22 17:07	تطور ملخوظ				en	sa	0	0	0
App Store	Alinma-Bank	db517c06-a19f-417e-96a7-9fef45db82fa	A bank that respects its customers.	ar	bank respect customers	Positive	App Store	1/27/22 10:38	عميل وافي	1/27/22 10:38	افضل مصرف في السعودية				en	sa	1	0	0
App Store	Alinma-Bank	954c8ef5-0a6a-469d-bfbb-12a578f4da66	One of the best banking applications in my opinion is easy to use and accessible.	ar	one best bank applications opinion easy use accessible	Positive	App Store	1/27/22 8:06	Ah5050ah	1/27/22 8:06	من افضل التطبيقات للبنوك في نظري				en	sa	0	0	0
App Store	Alinma-Bank	b1aac1b4-3072-40cc-8c48-ac6b022e9f4c	Great	ar	great	Positive	App Store	1/26/22 12:30	Mr.nice mane	1/26/22 12:30	رااائع				en	sa	0	0	0
App Store	Alinma-Bank	6757ed73-f56e-4b1c-9cf7-439d410af75d	The best bank I have dealt with in Saudi Arabia, and hopefully it will maintain this superiority.	ar	best bank deal saudi arabia hopefully maintain superiority	Positive	App Store	1/26/22 6:32	عبدالكريم الناجم	1/26/22 6:32	البنك رقم 1				en	sa	0	0	0
App Store	Alinma-Bank	2850169e-8827-4c13-b238-a9c7646a5303	"Al-Inma is growth, creativity, innovation, and distinctive and fast services. It is the bank of calmness, tranquility, and reassurance. I swear if I had wealth, I would deposit it all and be among those who do good deeds and strive to do good. It is the shining star among banks, a remedy for poverty."	ar	alinma growth creativity innovation distinctive fast service bank calmness tranquility reassurance swear wealth would deposit among good deeds strive good shin star among bank remedy poverty	Positive	App Store	1/25/22 18:20	خالداحمدموسي	1/25/22 18:20	Engineer				en	sa	0	0	0
App Store	Alinma-Bank	8d795b88-512a-4fe9-a520-a5d46332d8ed	Thanks for opening a new account	ar	thank open new account	Positive	App Store	1/25/22 8:08	شكراً لكم تطبيق رائع	1/25/22 8:08	شكراً على فتح حساب جديد				en	sa	0	1	0
App Store	Alinma-Bank	f4e24a1b-cf74-4652-bb59-a88bfb5d8b09	One of the most beautiful banks in the world, very professional dealings.	ar	one beautiful bank world professional dealings	Positive	App Store	1/23/22 9:04	اسكندر غانم	1/23/22 9:04	الرياض				en	sa	0	0	0
App Store	Alinma-Bank	d4c2715e-82bd-461e-b3ff-63e0d4cdff09	The tremendous efforts carried out by the management of Alinma Bank in keeping up with rapid developments in facilitating the bank's performance and facilitating financial transactions for customers are considered a qualitative leap and advanced competition, which makes the bank desirable and distinguished at the forefront of Arab and global banks. Many thanks and appreciation to those responsibl…	ar	tremendous efforts carry management alinma bank keep rapid developments facilitate bank performance facilitate financial transactions customers consider qualitative leap advance competition make bank desirable distinguish forefront arab global bank many thank appreciation responsible great institution	Positive	App Store	1/23/22 5:25	هقيت اني / ملگتگ	1/23/22 5:25	الجبيل				en	sa	1	0	0
App Store	Alinma-Bank	c48504d1-8cd6-4423-9e60-395eaf2c55db	Thank you for your kind cooperation.	ar	thank kind cooperation	Positive	App Store	1/21/22 18:07	ابو عناد العطيفي	1/21/22 18:07	النعيريه				en	sa	0	0	0
App Store	Alinma-Bank	fe4c0a01-7374-4ce6-a762-e6f8f7f9bff7	Insha'Allah, you will return to the service same as before.	ar	inshaallah return service	Positive	App Store	1/22/22 20:22	Dh1406	1/22/22 20:22	اضافة المستفيد بعد التعديل صار اصعب بعد ماكان سهل وسلس				en	sa	0	1	0
App Store	Alinma-Bank	b95dfdd5-00be-412d-b0d4-e05388ace182	The application is excellent. Thank you very much.	ar	application excellent thank much	Positive	App Store	1/19/22 21:01	اشمي	1/19/22 21:01	الرياض حي الياسمين				en	sa	0	0	0
App Store	Alinma-Bank	6cb54b21-98b4-4059-83cb-8fbc9e768c00	Thank you for your excellent services. You are a very exceptional bank with outstanding customer service.	ar	thank excellent service exceptional bank outstanding customer service	Positive	App Store	1/19/22 12:41	ahmed-83	1/19/22 12:41	بنك مميز جداً				en	sa	0	0	0
App Store	Alinma-Bank	5320cc75-c95c-4ebb-804b-a0c6ccc6370d	The best bank I have dealt with, honestly.	ar	best bank deal honestly	Positive	App Store	1/19/22 12:40	جحجيج	1/19/22 12:40	خدمه ممتازه				en	sa	0	0	0
App Store	Alinma-Bank	8fe3798d-ace9-4def-a669-9b0ce21fa3ac	May God guide everyone.	ar	may god guide everyone	Positive	App Store	1/19/22 10:36	ابو عبدالاءله	1/19/22 10:36	التطبيق يحتاج الى تسهيل عملية الاستخدام				en	sa	1	0	0
App Store	Alinma-Bank	7811a428-c5fb-43ad-adb8-65fa5405abcb	The best application after Al Rajhi Bank.	ar	best application al rajhi bank	Positive	App Store	1/18/22 4:43	المليو نير	1/18/22 4:43	مصرف الانماء				en	sa	0	0	0
App Store	Alinma-Bank	82ee833b-a791-4ba0-bd3e-783bbed1addd	Excellent program.	ar	excellent program	Positive	App Store	1/17/22 6:45	ابو عمر 555	1/17/22 6:45	ابو عمر				en	sa	0	0	0
App Store	Alinma-Bank	130592c0-eac8-4937-a3e4-b7389b903c6c	We hope to develop a banking application specifically for companies and institutions.	ar	hope develop bank application specifically company institutions	Positive	App Store	1/10/22 16:05	bajodah	1/10/22 16:05	الانماء				en	sa	1	0	0
App Store	Alinma-Bank	aec585f3-f4c2-4e79-9eb5-a48ec7237eb6	Easy and convenient services	ar	easy convenient service	Positive	App Store	1/8/22 9:32	Mjeed Ho	1/8/22 9:32	مصرف الإنماء				en	sa	0	0	0
App Store	Alinma-Bank	168b2817-edcd-4d1b-ae6e-ab064de72781	Thank you very much, satisfied.	ar	thank much satisfy	Positive	App Store	1/7/22 21:41	Abu Ashawi	1/7/22 21:41	تطبيق سلس جدا				en	sa	0	0	0
App Store	Alinma-Bank	4e78b2c5-e8e9-4dce-bdcf-13da91662c6c	Alinma Bank is one of the best banks I have dealt with. The easy application process, the politeness of the staff, and their warm welcome make me stick with you and not go to anyone else. Thank you, Alinma Bank.	ar	alinma bank one best bank deal easy application process politeness staff warm welcome make stick go anyone else thank alinma bank	Positive	App Store	1/5/22 21:26	اماني محمد علي	1/5/22 21:26	افضل بنك لدي				en	sa	1	0	0
App Store	Alinma-Bank	37853255-15fc-43a3-865c-14983ed5575a	Inshallah, they will stay at the same level or even better than that, too ð	ar	inshallah stay level even good	Positive	App Store	1/6/22 11:23	د مروان صويلح	1/6/22 11:23	تطبيق الانماء سهل التعامل وسريع				en	sa	0	0	0
App Store	Alinma-Bank	6a5061f4-1ca6-47fd-ac14-065e850ee320	The service quality is excellent and the speed of service on the website is extremely impressive. Keep up the good work!	ar	service quality excellent speed service website extremely impressive keep good work	Positive	App Store	1/5/22 19:56	mani75ha	1/5/22 19:56	بنك متميز				en	sa	0	0	0
App Store	Alinma-Bank	75832a63-5a19-491d-b459-fb854f4ea97f	One of the best applications Easy, convenient, and clear.	ar	one best applications easy convenient clear	Positive	App Store	1/5/22 14:48	ابن عطية	1/5/22 14:48	رائع جدا				en	sa	0	0	0
App Store	Alinma-Bank	f38fbd79-9c57-4002-bfa7-4d739285edcb	The best bank and the best application.	ar	best bank best application	Positive	App Store	1/4/22 12:57	يالله برزق مالحد فية منة	1/4/22 12:57	اتشرف بحمل بطاقة بنك انما				en	sa	0	0	0
App Store	Alinma-Bank	dd9bbf18-a9af-4725-b028-00966f43ad51	The best bank I have dealt with.	ar	best bank deal	Positive	App Store	1/3/22 14:27	ابو مروان١	1/3/22 14:27	جده				en	sa	0	0	0
App Store	Alinma-Bank	6e88a1e8-e916-4d4c-bc75-39a092e42377	Their service is excellent.	ar	service excellent	Positive	App Store	1/2/22 7:35	ام لين 2019	1/2/22 7:35	الله يوفقهم				en	sa	0	0	0
App Store	Alinma-Bank	319d0768-d6d2-4313-a8ef-cc8b5e41c3c0	Helloooooo	ar	helloooooo	Positive	App Store	5/10/23 8:24	الله ارحم بعباده	5/10/23 8:24	ممتاز جدا يستاهل البنك مبارك				en	sa	0	0	0
App Store	Alinma-Bank	5dba836a-ca4c-472b-a903-aa3e6b033a89	Peace be upon you and the mercy and blessings of Allah. I hope that you pay attention to the level of electronic service.	ar	peace upon mercy blessings allah hope pay attention level electronic service	Positive	App Store	9/1/23 13:48	Hani76	9/1/23 13:48	من اسوء لاسوء!!				en	us	1	0	0
App Store	Alinma-Bank	1a3d9be5-110a-41f1-ae49-66da51f8f595	Special application, thank you.	ar	special application thank	Positive	App Store	8/28/23 12:21	فواز القبلان	8/28/23 12:21	شكرا				en	us	0	0	0
App Store	Alinma-Bank	97f2b149-660f-4d6d-b068-76ee8b9afa36	Comfortable with a beautiful interface and good security.	ar	comfortable beautiful interface good security	Positive	App Store	7/31/23 11:09	BugshanT	7/31/23 11:09	ممتاز				en	us	0	0	0
App Store	Alinma-Bank	91b29d48-860d-4f17-81e4-7155c868bd6a	The Al-Inmaa application is convenient, clear, and comprehensive.	ar	alinmaa application convenient clear comprehensive	Positive	App Store	5/23/23 14:32	ابو عبدالله الروقي	5/23/23 14:32	Saoud				en	us	1	0	0
App Store	Alinma-Bank	839e8175-c721-44d5-b333-5dd23167a22f	Thank you to all the dedicated staff and workers of this generous bank. I ask Allah to continue to bless you with His bounty and to bring security and prosperity upon you. Hassan Al-Mousa / a humble client in your esteemed bank.	ar	thank dedicate staff workers generous bank ask allah continue bless bounty bring security prosperity upon hassan almousa humble client esteem bank	Positive	App Store	5/4/23 11:49	leesara.	5/4/23 11:49	الدمام/حي الشاطئ الشرقي/جوال 0505860386				en	us	1	0	0
App Store	Alinma-Bank	d80ae044-8b15-4d3c-a102-6c910dfac134	Peace be upon you and the mercy and blessings of Allah. I am one of the previous customers of Alinma Bank and I admire your dealings in all the services you provide in the bank. Even when I face any simple problem or have any inquiries, you are very cooperative with me. However, the only reason that made me give 3 stars is the application. Sorry, but the application is honestly bad. Every time I …	ar	peace upon mercy blessings allah one previous customers alinma bank admire dealings service provide bank even face simple problem inquiries cooperative however reason make give star application sorry application honestly bad every time log log almost disable account sometimes want check balance cant without crash slow wait long time receive code message continue transactions ahli bank dont know a…	Positive	App Store	4/14/23 0:11	callmeanono	4/14/23 0:11	اتمنى تعملون تحديث لهذا التطبيق				en	us	1	1	1
App Store	Alinma-Bank	7d2139eb-737d-484c-b91d-7bd88ddd86bb	I swear to God, Alinma Bank is the best bank I have dealt with. ð¤	ar	swear god alinma bank best bank deal	Positive	App Store	3/3/23 18:19	الانماء 🤎🤎🤎🤎	3/3/23 18:19	الانماء				en	us	0	0	0
App Store	Alinma-Bank	26655b61-c9ec-45f1-a2e1-15785287c173	The easiest, fastest, and most enjoyable application for all transactions. God bless you. Awesome.	ar	easy fast enjoyable application transactions god bless awesome	Positive	App Store	3/2/23 18:16	Naitah Naif	3/2/23 18:16	رأي				en	us	0	0	0
App Store	Alinma-Bank	abc4516d-fca6-4af5-b30b-4076674bc192	May God bless you, grant you long life, and provide for you.	ar	may god bless grant long life provide	Positive	App Store	11/30/22 9:27	القنوع	11/30/22 9:27	دعاء لكم				en	us	1	0	0
App Store	Alinma-Bank	97f9f262-a731-462f-8595-f4fa845269b9	Dear, Alinma Bank is the best in all banking services in every aspect, and this is my personal opinion unmatched by any other local banks. The bank has clear vision in its dealings with customers, from internet services to currency exchange services and customer services. I am grateful for opening a bank account with them. Thank you,	ar	dear alinma bank best bank service every aspect personal opinion unmatched local bank bank clear vision dealings customers internet service currency exchange service customer service grateful open bank account thank	Positive	App Store	11/24/22 8:37	بس محمد	11/24/22 8:37	Best banking services				en	us	0	0	0
App Store	Alinma-Bank	7086fbdf-60e5-4b55-8860-5d8332e2fc5a	A very wonderful, flexible, and easy to use application.	ar	wonderful flexible easy use application	Positive	App Store	11/21/22 15:16	user331346	11/21/22 15:16	سهل الاستخدام				en	us	0	0	0
App Store	Alinma-Bank	6fcde14f-9033-489e-bd16-a6fa5f43f5cb	Thank you to the entire Alinma Bank family for their continuous and integrated efforts, with the aim of customer satisfaction and product quality.	ar	thank entire alinma bank family continuous integrate efforts aim customer satisfaction product quality	Positive	App Store	11/9/22 16:13	khaledskh	11/9/22 16:13	بنك رائع وتطبيق أروع				en	us	0	0	0
App Store	Alinma-Bank	c9bb6431-35ec-4d7e-bdae-26124f27c917	Thank you .. I appreciate your efforts.	ar	thank appreciate efforts	Positive	App Store	10/28/22 8:07	Shams MM	10/28/22 8:07	شكر وتقدير لكم				en	us	0	0	0
App Store	Alinma-Bank	6a2dcd29-022f-43b8-aabc-c70838baa31e	One of the easiest and quickest banking applications. Thank you very much, Alinma Bank. ð¹	ar	one easy quick bank applications thank much alinma bank	Positive	App Store	10/29/22 19:58	fa_deel	10/29/22 19:58	افضل بنك				en	us	0	0	0
App Store	Alinma-Bank	7b7d459a-1597-4961-a88c-ecd3b5084a86	Thank you so much.	ar	thank much	Positive	App Store	10/25/22 13:26	511عادل	10/25/22 13:26	ممتاز				en	us	0	0	0
App Store	Alinma-Bank	960585d3-7149-443e-9519-24ef2eb99bcf	I am satisfied with the online service, may God bless you and give you wellness. And more success. However, some of the employees in the branches may feel tired, possibly due to increased workload and shortages of staff. This affects their manner of dealing with customers appropriately. Even private customers have to wait for 30-40 minutes or maybe more. I hope this issue can be addressed by incr…	ar	satisfy online service may god bless give wellness success however employees branch may feel tire possibly due increase workload shortages staff affect manner deal customers appropriately even private customers wait minutes maybe hope issue address increase number staff especially busy branch thank	Positive	App Store	9/25/22 17:07	2fineahmad	9/25/22 17:07	احمد بن صالح				en	us	1	0	0
App Store	Alinma-Bank	1ac195ae-0de1-4eb6-b773-58060c10cd30	I have used several banking applications. This specific application is the best among the others. It has a simple and smooth design, elegant and functional interfaces.	ar	use several bank applications specific application best among others simple smooth design elegant functional interfaces	Positive	App Store	8/10/22 15:50	Abdullah NSR	8/10/22 15:50	👍🏻				en	us	0	0	0
App Store	Alinma-Bank	101df64e-5f71-4ab4-a4d2-9e7c20a4b83c	Bank Al-Enma is one of the best banks, and God willing, I will transfer my salary to you. Thank you ð¹	ar	bank alenma one best bank god will transfer salary thank	Positive	App Store	8/4/22 3:30	ابو وسام وامير	8/4/22 3:30	شكر لكم				en	us	0	0	0
App Store	Alinma-Bank	a53012fb-6557-477b-917c-f9580d1236fe	Thank you all for the excellent services.	ar	thank excellent service	Positive	App Store	7/24/22 4:42	abady1978	7/24/22 4:42	بطاقة شكر				en	us	0	0	0
App Store	Alinma-Bank	9bbc63da-dd0b-423f-bbf1-9a27d203a787	Please pray for me to have success, righteousness, and guidance for my children.	ar	please pray success righteousness guidance children	Positive	App Store	5/24/22 7:49	ابو محمد ٥٥٥٥	5/24/22 7:49	ا				en	us	1	0	0
App Store	Alinma-Bank	304e03f0-7ba2-4d27-95ca-7f470ff101f0	We are a people whom Allah has honored with Islam, and our Arabic language is the most beautiful language. Why are we forced to write the reason for the transfer in English instead of Arabic!! The freedom of choice should be left to the customer in all banks. I hope that your upcoming update includes this and that the application is developed comprehensively to keep up with your constant excellen…	ar	people allah honor islam arabic language beautiful language force write reason transfer english instead arabic freedom choice leave customer bank hope upcoming update include application develop comprehensively keep constant excellence	Positive	App Store	5/28/22 1:14	Jaber bin nasser	5/28/22 1:14	لماذا يتم ذكر سبب الحوالة بالانجليزية				en	us	1	0	0
App Store	Alinma-Bank	47baf3b7-6e0d-4c89-9c2b-dfac3cbfd6a7	Bank deserves praise, especially the application.	ar	bank deserve praise especially application	Positive	App Store	5/22/22 19:20	nbg2009876	5/22/22 19:20	Hi				en	us	1	0	0
App Store	Alinma-Bank	a9217bae-671c-476c-8565-fe1703b1646e	May God give you wellness and the application is very easy and the process is fast.	ar	may god give wellness application easy process fast	Positive	App Store	5/15/22 8:29	khaledmy	5/15/22 8:29	شكرا إنماء				en	us	1	0	0
App Store	Alinma-Bank	7f965dbc-b6e3-4f00-a97f-b6955f8ca0cf	A fantastic application that meets most of your transactions without the need to visit branches.	ar	fantastic application meet transactions without need visit branch	Positive	App Store	4/30/22 2:27	Just_7MoodY	4/30/22 2:27	افضل تطبيق بنك سعودي				en	us	1	1	0
App Store	Alinma-Bank	d996c9f2-91b0-4bc8-9f1e-bcd9cdc08aea	I wish for the improvement of the UX/UI and for it to be smooth and fast. The dark mode needs improvement, especially the colors of the account cards.	ar	wish improvement uxui smooth fast dark mode need improvement especially color account card	Positive	App Store	4/27/22 23:57	thamer1900	4/27/22 23:57	رائع لكن يحتاج تحسين				en	us	1	0	0
App Store	Alinma-Bank	cbe47511-1ef4-4c9f-ab88-d329f90562c0	I gave him one star because he only works after forcing the update to work!!	ar	give one star work force update work	Positive	App Store	4/27/22 8:29	Mohannad9	4/27/22 8:29	ما يعمل بدون تحديث				en	us	0	1	0
App Store	Alinma-Bank	1f8a820a-556d-4612-a031-b8d9e3b1ba6a	Excellent service, thank you Inma.	ar	excellent service thank inma	Positive	App Store	4/6/22 14:08	الحر الباكي	4/6/22 14:08	خدمه متميزة				en	us	0	0	0
App Store	Alinma-Bank	1527b5dd-66a9-448f-9228-e0ed10b89186	The best bank on the planet ð¤	ar	best bank planet	Positive	App Store	3/20/22 13:22	ام سعوووود	3/20/22 13:22	Riyadh				en	us	0	0	0
App Store	Alinma-Bank	e37ce99c-50f9-476a-ad04-c25b99b9a78c	We thank the employees of Alinma Bank, especially the director of the bank (Alaa Abdullah Alnuwaif) for their excellent handling, prompt services, and courteous manner.	ar	thank employees alinma bank especially director bank alaa abdullah alnuwaif excellent handle prompt service courteous manner	Positive	App Store	2/10/22 15:12	الخوبه	2/10/22 15:12	حي الغزالي				en	us	0	0	0
App Store	Alinma-Bank	85bec4bf-e10f-456a-90f3-710954bcf3bb	Excellent service	ar	excellent service	Positive	App Store	2/16/22 6:56	حاسن الحربي	2/16/22 6:56	خدمة ممتازة				en	us	0	0	0
App Store	Alinma-Bank	72f3f256-5a3d-4854-8a1b-f5a060c203f7	I thank the brother whose name I do not know, who is at the customer service desk on the ground floor, second office on the right, for helping with mobile registration and account opening. May Allah bless him.	ar	thank brother whose name know customer service desk grind floor second office right help mobile registration account open may allah bless	Positive	App Store	2/10/22 12:44	ALI.M.A	2/10/22 12:44	فرع قرطبة				en	us	1	0	0
App Store	Alinma-Bank	8ab9b0eb-756d-423f-a8e0-b9d48153556c	The best bank, I swear. ðð	ar	best bank swear	Positive	App Store	2/4/22 20:17	khadijah alatawi	2/4/22 20:17	افضل بنك بالسعودية				en	us	0	0	0
App Store	Alinma-Bank	f6be7256-ac53-4efd-9cf0-5381755ee6a5	Thank you very much, honestly Alinma is excellent.	ar	thank much honestly alinma excellent	Positive	App Store	1/2/22 6:58	ابو حسين حسين	1/2/22 6:58	راضي				en	us	0	0	0
App Store	Alinma-Bank	f479a641-4179-4d8a-b959-19c0c32af28c	Such a great bank One of the best bank in KSA.I am totally satisfied & very happy ð	en	great bank one best bank ksai totally satisfy happy	Positive	App Store	8/17/23 18:16	Somy Mughal	8/17/23 18:16	Asim Zahid				en	ae	0	0	0
App Store	Alinma-Bank	894c8b69-2668-42ee-83d5-a30ea4548e85	Really I am very satisfied with Alinma bank service especially when I visit in Branch Al Hasa al staff is dealing very friendly thanks for this.	en	really satisfy alinma bank service especially visit branch al hasa al staff deal friendly thank	Positive	App Store	11/2/22 14:25	Ranjit sandhu	11/2/22 14:25	Excellent service				en	ca	0	0	0
App Store	Alinma-Bank	1b779f67-cd19-4fa4-ae74-eeab65766bdf	I am very satisfied with my bank services	en	satisfy bank service	Positive	App Store	7/14/23 16:43	Amirbukhari77	7/14/23 16:43	I am very satisfied with my bank services				en	gb	1	0	0
App Store	Alinma-Bank	049c5712-54f5-4446-9bed-b67bfbea03c6	The best bank with the best technology.	en	best bank best technology	Positive	App Store	11/21/22 19:09	D.Adani	11/21/22 19:09	Mobile Banking				en	gb	0	0	0
App Store	Alinma-Bank	a7c30424-fd00-448f-be48-15f47587f274	âGreat and wonderful	en	great wonderful	Positive	App Store	8/28/23 13:05	Lodi400	8/28/23 13:05	Alina bank				en	gb	0	0	0
App Store	Alinma-Bank	7689e553-6f2a-404e-a856-30b88598987f	So easy	en	easy	Positive	App Store	2/5/22 16:23	Rizwan qqq567	2/5/22 16:23	Superb				en	in	0	0	0
App Store	Alinma-Bank	4cd77b72-ea6d-4005-a7d3-4bacf47ca258	Very good service and Very fast.Employees are very helpful,humble and kind.	en	good service fastemployees helpfulhumble kind	Positive	App Store	7/24/23 11:09	Hafisnizar	7/24/23 11:09	Marketing				en	in	0	0	0
App Store	Alinma-Bank	d713350d-879c-49cf-a438-22f545efeee0	Amazinggggg service	en	amazinggggg service	Positive	App Store	4/5/22 15:09	Ge0achkar	4/5/22 15:09	* * * * *				en	lb	0	0	0
App Store	Alinma-Bank	3b6caa78-dcce-44f5-8513-8b851f75b3c3	So easy to use sent money to Philippines	en	easy use send money philippines	Positive	App Store	2/26/23 11:25	@imudy	2/26/23 11:25	Thanks				en	ph	0	0	0
App Store	Alinma-Bank	f292b7cd-3b66-4f63-a462-1bfcba446823	Satisfied	en	satisfy	Positive	App Store	4/18/22 8:13	Ogiergc	4/18/22 8:13	Mr				en	ph	0	0	0
App Store	Alinma-Bank	73118f16-4d13-41b4-bcb9-2d0dc6862acc	Its very easy and good service. Very fast and quick response.	en	easy good service fast quick response	Positive	App Store	11/27/22 8:45	nickiiii77	11/27/22 8:45	Open online account				en	pk	0	0	0
App Store	Alinma-Bank	676b2ddf-bb5c-423d-b278-abfa0a4222c3	Best bank in SAUDIA Arabia	en	best bank saudia arabia	Positive	App Store	7/7/22 16:56	salman410	7/7/22 16:56	SALMAN Ahmed				en	pk	0	0	0
App Store	Alinma-Bank	098f7ee5-2b8e-4156-9cb0-a4b6e0d93ed3	Hope this note finds you well . It happens to deal with many banks inside and outside of Saudi Arabia, let me bring to your great attention that Alinma is the finest bank in the nation and if you keep your service as it is now I am sure you will be #1 in Saudi Arabia . I am so proud of you and your falks here in Sakaka. Thanks	en	hope note find well happen deal many bank inside outside saudi arabia let bring great attention alinma fine bank nation keep service sure saudi arabia proud falks sakaka thank	Positive	App Store	5/25/22 5:48	houtah532	5/25/22 5:48	Great services				en	sa	1	0	0
App Store	Alinma-Bank	6b316f5f-f38e-4616-a26b-42f4c1471aa2	It is a very fast services also very easy interface, we can quickly guess how to find what we exactly want I like this app so much but I want from the bank to ease the activation of the beneficiary ð¤ð¤ð¤thank you	en	fast service also easy interface quickly guess find exactly want like app much want bank ease activation beneficiary thank	Positive	App Store	4/25/22 3:26	huda al ahmadi	4/25/22 3:26	Fast and useful				en	sa	0	0	0
App Store	Alinma-Bank	fd812329-4d6e-4f4e-bb55-b73c0e7a2e33	I have been using youâre service for almost 5 months now and youâre service are brilliant. Online transaction. Safety and Quick services. Well done Alinma Bank Keep it up good works ðð¾	en	use youre service almost months youre service brilliant online transaction safety quick service well do alinma bank keep good work	Positive	App Store	1/6/22 23:13	Abbas Moga	1/6/22 23:13	Best bank of the century				en	sa	0	0	0
App Store	Alinma-Bank	1459cee6-de0b-4e4b-a1bb-defb373f948a	Masha Allah ð¤² it has noted easy steps alinma provided for the customers to open online account, without visiting d Bank. I proud to implement to my colleagues and friends. Excellent service. Keep it up ðð» Aboobacker Sideeque	en	masha allah note easy step alinma provide customers open online account without visit bank proud implement colleagues friends excellent service keep aboobacker sideeque	Positive	App Store	5/20/23 5:33	Abureem Visa	5/20/23 5:33	Online alinma a/c opening system				en	sa	0	0	0
App Store	Alinma-Bank	b109d972-e4b7-470c-8f1a-b54e40cb7665	Really easy to use services and fast service Iâm really satisfied by Alinma bank serviceâs	en	really easy use service fast service im really satisfy alinma bank service	Positive	App Store	9/22/22 21:20	rjdeadpool_rs	9/22/22 21:20	Use Alinma bank for fast and easy services				en	sa	0	0	0
App Store	Alinma-Bank	f1dfc839-18e2-481b-b700-97b2957002a9	Alinma bank always better easy	en	alinma bank always good easy	Positive	App Store	12/31/22 5:27	itsrazaq	12/31/22 5:27	One of the best and very friendly banking services				en	sa	0	0	0
App Store	Alinma-Bank	c4af1fbb-eace-4c7a-840b-ffa9b94b3a74	Perfect service	en	perfect service	Positive	App Store	9/13/22 1:59	Sawab Khan	9/13/22 1:59	Highly recommend				en	sa	0	0	0
App Store	Alinma-Bank	89b4b984-97e8-4830-9305-783d53f82fbe	I really like using Alinma Bank app as it is super user-friendly and efficient to use. Kudos!	en	really like use alinma bank app super userfriendly efficient use kudos	Positive	App Store	6/20/22 13:51	Renzie_007	6/20/22 13:51	Efficient and easy to use				en	sa	0	0	0
App Store	Alinma-Bank	74784a86-0a4c-4f17-b6b9-95a04bb11607	One of best app easy to use multiple options Attractive and easy design	en	one best app easy use multiple options attractive easy design	Positive	App Store	1/28/22 18:20	BO ABEED	1/28/22 18:20	Best app for bank				en	sa	0	0	0
App Store	Alinma-Bank	322dd267-f3c8-4ff6-b348-468937a5317c	The service completely excellent please keep it up	en	service completely excellent please keep	Positive	App Store	1/25/23 19:26	sam fierc	1/25/23 19:26	Good service				en	sa	0	0	0
App Store	Alinma-Bank	4e6d6497-d564-47c9-9258-b5ed8fc60fec	I love my bank it super cool service everything is easy no hassle i feel free to my alimna bank	en	love bank super cool service everything easy hassle feel free alimna bank	Positive	App Store	1/28/22 9:31	roofaskhan	1/28/22 9:31	My alimna bank				en	sa	0	0	0
App Store	Alinma-Bank	10cf8b3f-9b0b-4f20-83dd-9ca9f26dd367	Dear to whom it may concern, Thank you for all the great efforts and the easy app. Keep up the good work.. and keep my money safeð¤£	en	dear may concern thank great efforts easy app keep good work keep money safe	Positive	App Store	8/14/23 10:31	AMAL.M.S.H	8/14/23 10:31	A happy client				en	sa	1	0	0
App Store	Alinma-Bank	1ea387e4-dea9-4fad-a299-3c2a05130f29	Excellent online service by the bank Secured safe and easy.	en	excellent online service bank secure safe easy	Positive	App Store	8/18/22 13:32	Bash1953	8/18/22 13:32	Service				en	sa	0	0	0
App Store	Alinma-Bank	3b3bbef7-e258-46ce-bbfb-e96d02d1c6ee	Users friendly â¤ï¸â¤ï¸â¤ï¸	en	users friendly	Positive	App Store	1/11/22 7:10	shakerls	1/11/22 7:10	Users friendly				en	sa	0	0	0
App Store	Alinma-Bank	d601083c-9f49-48e2-9d8a-1b1bf10b977e	Actually it is one of the best bank app I have ever used but tge new update has a problem in login	en	actually one best bank app ever use tge new update problem login	Positive	App Store	4/27/22 1:56	3liabdulrahman	4/27/22 1:56	Login problem				en	sa	0	1	0
App Store	Alinma-Bank	b232e5fa-965d-41a9-a540-903e0b38be9b	A very good app never hang and create always update and itâs smooth app always ease	en	good app never hang create always update smooth app always ease	Positive	App Store	3/12/23 18:44	askilpl	3/12/23 18:44	Awesome app always go				en	sa	1	0	1
App Store	Alinma-Bank	1c9851b6-dcb1-4254-a50f-d0f310f0d9ce	Easy to use done ur needs with few clicks	en	easy use do ur need click	Positive	App Store	5/17/22 14:15	K8nm	5/17/22 14:15	Simple yet fast				en	sa	1	0	0
App Store	Alinma-Bank	ddbde779-5648-4108-b16f-68893b923318	A noticeable improvement in userâs experience	en	noticeable improvement users experience	Positive	App Store	9/7/22 6:14	koLoneL93	9/7/22 6:14	The experience				en	sa	1	0	0
App Store	Alinma-Bank	40904b23-e889-4bb7-ba3d-1ecd0e1250be	Great app. Customer service 8/10.	en	great app customer service	Positive	App Store	2/3/23 5:31	عبادي.....الرياض	2/3/23 5:31	I have an account in the bank				en	sa	0	0	0
App Store	Alinma-Bank	51ab8557-42ca-45c0-a62b-6788976d5717	Completely satisfied with Inma App, and the ease of provided! Highly recommended bank and app.	en	completely satisfy inma app ease provide highly recommend bank app	Positive	App Store	8/16/23 16:46	Saudi5555	8/16/23 16:46	Exceptional Service by Inma				en	sa	0	0	0
App Store	Alinma-Bank	c4f7bfc8-5322-428e-84d2-980f3c4644e1	A very user friendly application. Thanks.	en	user friendly application thank	Positive	App Store	5/17/22 18:41	KING OF THY KINGS	5/17/22 18:41	Service				en	sa	0	0	0
App Store	Alinma-Bank	f66cfb61-5bb8-4e19-97bf-eeebd50244bb	Dear alinma bank Your service is very good and stay the same. Thank you. I am Nepali.ð³ðµ	en	dear alinma bank service good stay thank nepali	Positive	App Store	6/6/22 13:24	subasssh	6/6/22 13:24	Dear alinma bank family				en	sa	0	0	0
App Store	Alinma-Bank	ea9bde39-5e1f-4a1e-b3a8-736eb90a6b29	Amazing web friendly site	en	amaze web friendly site	Positive	App Store	1/10/22 18:45	Arifshariff	1/10/22 18:45	Great Services				en	sa	0	0	0
App Store	Alinma-Bank	1fdd0f1f-d8eb-49cc-b59d-6f643640d664	Thankyou so much Alinma bank and group this service was so good Iâm so happy to used Alinma bank service	en	thankyou much alinma bank group service good im happy use alinma bank service	Positive	App Store	3/17/22 13:37	ck khan	3/17/22 13:37	Adilrmvlogs				en	sa	0	0	0
App Store	Alinma-Bank	78cbdcd6-151a-496d-b4c0-a0f252e09e21	Amazing, organized and easy to use ðð»	en	amaze organize easy use	Positive	App Store	1/11/22 20:06	Nawaf S J A	1/11/22 20:06	Feedback				en	sa	0	0	0
App Store	Alinma-Bank	ea66139f-a834-440d-a5dc-266a79e9bdcf	Thank you for your good and fast services	en	thank good fast service	Positive	App Store	4/23/22 14:09	Ibrahim Maksoud	4/23/22 14:09	Good services				en	sa	0	0	0
App Store	Alinma-Bank	073fe796-dc25-436b-9714-308de366da08	Marvelous bank wish you all the best.	en	marvelous bank wish best	Positive	App Store	1/22/23 19:39	Abohesham84	1/22/23 19:39	Thanks				en	sa	0	0	0
App Store	Alinma-Bank	1d55d36f-ed72-4247-819e-64ace7d6044d	Alinma is one of the best banking places you ever experience in Saudi Arabia Thank you	en	alinma one best bank place ever experience saudi arabia thank	Positive	App Store	11/28/22 17:23	Norasbaroudi	11/28/22 17:23	Excellent service				en	sa	0	0	0
App Store	Alinma-Bank	2ef2b8b5-66df-41f3-b765-538229fa3aad	Awesome experience Very very easy and hassle free Kudos	en	awesome experience easy hassle free kudos	Positive	App Store	9/2/22 11:14	PrinzCharlz	9/2/22 11:14	Most user friendly bank in KSA				en	sa	0	0	0
App Store	Alinma-Bank	1bd740b6-ae12-482f-b375-2b5fbc59e356	Appreciate for service	en	appreciate service	Positive	App Store	6/4/23 12:36	ma da 1212	6/4/23 12:36	Appreciate for service				en	sa	0	0	0
App Store	Alinma-Bank	271a5b66-a467-42a0-91b6-85bae993e1e7	I have a very good experience with this bank itâs the best bank in Saudi Arabia.	en	good experience bank best bank saudi arabia	Positive	App Store	7/15/22 21:25	Sudais06	7/15/22 21:25	Best bank				en	sa	0	0	0
App Store	Alinma-Bank	f362f265-08ff-4fd3-9d50-9bf802621e82	Such a excellent service im very happy to use alinma services.	en	excellent service im happy use alinma service	Positive	App Store	1/7/23 1:09	zohaib wahla	1/7/23 1:09	Loved this bank				en	sa	0	0	0
App Store	Alinma-Bank	f543f9c9-5843-4a50-97bc-5bd63e32a4f0	Easy to do your transactions by.	en	easy transactions	Positive	App Store	12/12/22 17:02	أأبو نوااف	12/12/22 17:02	Good				en	sa	0	0	0
App Store	Alinma-Bank	5de5e4c7-d361-4d8c-99aa-bdbaed0034a6	A cute bank. With very polite staff and nice atmosphere and user friendly services	en	cute bank polite staff nice atmosphere user friendly service	Positive	App Store	1/6/22 9:28	agkhatib	1/6/22 9:28	ALINMA bank				en	sa	0	0	0
App Store	Alinma-Bank	7d86117f-c4f6-4821-bdd9-f937528e198f	Completely satisfied from this app.	en	completely satisfy app	Positive	App Store	5/11/23 16:54	AbdulShakoorKakar	5/11/23 16:54	Abdul Shakoor				en	sa	1	0	0
App Store	Alinma-Bank	efbeb46e-8617-4254-981e-65b4d8a09d66	Great banking app little improvement required comparing to Alrajhi bank	en	great bank app little improvement require compare alrajhi bank	Positive	App Store	2/26/23 17:14	rishaanrafeeq	2/26/23 17:14	SMR				en	sa	1	0	0
App Store	Alinma-Bank	99a388ff-85e9-4c07-956b-e8516033cd79	Very nice and Quick	en	nice quick	Positive	App Store	1/3/23 5:17	Fmoins	1/3/23 5:17	Wonderful				en	sa	0	0	0
App Store	Alinma-Bank	b90af64f-9a6d-4c23-b45e-01de696c48b1	Amazing bank with amazing bank app. I whould like to thank to Alinma for such a termindous banking facilities. Fabolastic....	en	amaze bank amaze bank app whould like thank alinma termindous bank facilities fabolastic	Positive	App Store	11/18/22 6:00	imtiaz18	11/18/22 6:00	Thank you Alinma.				en	sa	0	0	0
App Store	Alinma-Bank	982416c2-4e4e-4cb3-be5b-db764834cc18	Thanks for your support	en	thank support	Positive	App Store	9/7/22 8:08	blackshote	9/7/22 8:08	Thanks for your support				en	sa	0	0	0
App Store	Alinma-Bank	e637e13c-9a69-4710-831b-b45a2edd348d	Excellent On line services Thanks ..	en	excellent line service thank	Positive	App Store	4/27/22 20:15	Icell12	4/27/22 20:15	Thank you				en	sa	0	0	0
App Store	Alinma-Bank	62540ea4-0947-46bd-b880-b7fae21d40a4	Very nice service and experience good technology and experience Allhumdulilah	en	nice service experience good technology experience allhumdulilah	Positive	App Store	3/15/22 22:20	Allhumdulilah	3/15/22 22:20	Mashaallah				en	sa	0	0	0
App Store	Alinma-Bank	b766113e-195d-401a-91b9-067cee9f4735	Thanks Alinma you make my work easy	en	thank alinma make work easy	Positive	App Store	3/5/23 18:48	ስደተኛዋ	3/5/23 18:48	🌟🌟🌟🌟				en	sa	0	0	0
App Store	Alinma-Bank	fe1a36ce-5bbe-4d55-a4c5-b6b274f88d92	Superior app capabilities	en	superior app capabilities	Positive	App Store	4/12/23 10:29	Bsoalslksjdkskala	4/12/23 10:29	Incredible and superior app				en	sa	1	0	0
App Store	Alinma-Bank	907b3d8a-00c9-45d8-8f80-9066c4b2b57d	Best bank for all services , 9 years partner ð¹	en	best bank service years partner	Positive	App Store	4/9/23 0:09	Ahmed sekoo	4/9/23 0:09	The best				en	sa	0	0	0
App Store	Alinma-Bank	602d51f9-99d7-43d8-b4c7-f517fbf20857	Easy to use and very convinient.	en	easy use convinient	Positive	App Store	8/8/22 1:07	junix23	8/8/22 1:07	Goodjob				en	sa	0	0	0
App Store	Alinma-Bank	b75a11ed-aeeb-4569-846a-ad397d05b5f5	Actually excellent online bankingðð	en	actually excellent online bank	Positive	App Store	3/7/22 12:19	engrabe3	3/7/22 12:19	Very good				en	sa	0	0	0
App Store	Alinma-Bank	cca27a06-287e-4d18-ba15-165b546f7bc4	Love them	en	love	Positive	App Store	10/26/22 12:28	Ahmed 1234567890	10/26/22 12:28	Great service				en	sa	0	0	0
App Store	Alinma-Bank	c7ac815a-5565-472e-9c87-50c84efef6f5	This is an amazing bank	en	amaze bank	Positive	App Store	8/23/23 6:49	ابن قهيدان	8/23/23 6:49	This is an amazing bank				en	sa	0	0	0
App Store	Alinma-Bank	a4867354-3e9f-4293-b215-b582f0f0cb56	Great bank with a great services	en	great bank great service	Positive	App Store	8/20/22 14:30	AbuTalah	8/20/22 14:30	Alinma bank				en	sa	0	0	0
App Store	Alinma-Bank	faaa3675-161e-4b5f-bea4-c77c042a9a93	The best bank services ever	en	best bank service ever	Positive	App Store	3/1/23 17:15	F2on	3/1/23 17:15	The best bank				en	sa	0	0	0
App Store	Alinma-Bank	619a9b1f-26ec-46e0-8fa1-fc7b4b68cba1	Since yesterday trying to login after login auto signout woow amazing feature your introduced	en	since yesterday try login login auto signout woow amaze feature introduce	Positive	App Store	3/29/23 10:16	M Abbas 381	3/29/23 10:16	App is not working				en	sa	0	1	0
App Store	Alinma-Bank	0525819c-371a-4400-9c60-8f3fe26598ad	Best service	en	best service	Positive	App Store	7/18/22 8:08	Addyyii	7/18/22 8:08	Alinma bank				en	sa	0	0	0
App Store	Alinma-Bank	33e89352-f58d-4678-92ec-6b820b36aec3	Very nice work alinima bank good services and good secure Alinma bank	en	nice work alinima bank good service good secure alinma bank	Positive	App Store	1/31/22 4:36	Mandal777	1/31/22 4:36	Alinma				en	sa	0	0	0
App Store	Alinma-Bank	46c79eca-2b1d-43c4-8566-5b40fd9cc4ac	Best Wishes to Alinma team for the best banking service	en	best wish alinma team best bank service	Positive	App Store	3/25/22 17:37	owais384	3/25/22 17:37	Best banking service				en	sa	0	0	0
App Store	Alinma-Bank	75bd3be3-1a54-4969-92af-ddc05111ed20	Very good service	en	good service	Positive	App Store	12/20/22 17:24	ZAAM4	12/20/22 17:24	Evaluation				en	sa	0	0	0
App Store	Alinma-Bank	07c7fbea-0a1a-4b21-ba51-2fc80f428f4c	Realy gud Sarvic and too simple to use	en	realy gud sarvic simple use	Positive	App Store	3/8/22 2:35	arhum waqas	3/8/22 2:35	Very good Sarvic				en	sa	0	0	0
App Store	Alinma-Bank	710718dd-75be-48e8-b855-d9dbbf07d7bf	Great App	en	great app	Positive	App Store	2/8/23 11:01	Masteregy	2/8/23 11:01	Professional				en	sa	0	0	0
App Store	Alinma-Bank	7cd640a5-2d2e-4eef-acf2-3bf5c82e43b0	Best Bank add	en	best bank add	Positive	App Store	5/1/22 9:47	Saaaam11111	5/1/22 9:47	Convenient				en	sa	0	0	0
App Store	Alinma-Bank	b4a86ed0-6f60-46e6-8885-d54f94e87450	Very useful	en	useful	Positive	App Store	1/9/22 20:44	MUSLIM ZAMIN	1/9/22 20:44	Good job				en	sa	0	0	0
App Store	Alinma-Bank	861472c3-67e5-48e3-a55e-e97999ed7952	The best app on the world	en	best app world	Positive	App Store	12/31/22 21:41	demo_999	12/31/22 21:41	Application				en	sa	0	0	0
App Store	Alinma-Bank	313fe34a-6d22-47bc-809a-e7d4a03990d7	Good app. Easy to use.	en	good app easy use	Positive	App Store	1/5/23 10:21	Alfredo gonzalos	1/5/23 10:21	INMA Bank				en	sa	0	0	0
App Store	Alinma-Bank	bb69f3f8-01b5-4ed3-924b-638ed1d665c0	Thanks a lot ð	en	thank lot	Positive	App Store	3/4/23 8:37	noonksa	3/4/23 8:37	Thanks				en	sa	0	0	0
App Store	Alinma-Bank	f60b12f3-4e6a-4bd5-9c84-42c1740aa763	Excellent App	en	excellent app	Positive	App Store	2/12/22 9:52	Q.Abbasi	2/12/22 9:52	Feedback				en	sa	0	0	0
App Store	Alinma-Bank	0dc6250c-7458-4fa8-9645-afde7b1b2e21	Cery goos , fast and efficient	en	cery goos fast efficient	Positive	App Store	4/12/23 14:30	zeyad nabeil	4/12/23 14:30	Excellent				en	sa	0	0	0
App Store	Alinma-Bank	61d25c95-0799-4e2d-933e-70de0b601c0c	Please get back to previous app much better	en	please get back previous app much good	Positive	App Store	9/15/23 11:36	LORDKMB	9/15/23 11:36	New app is very bad				en	sa	1	0	0
App Store	Alinma-Bank	1dbaa675-f66f-43ff-ab8c-da95fe172262	Wow service	en	wow service	Positive	App Store	2/8/22 22:29	Arsh5326	2/8/22 22:29	Wow service and eco friendly "........................				en	sa	0	0	0
App Store	Alinma-Bank	90634c67-4bf0-4a5b-af91-41fc44267e9c	Thanks for this app ð¥	en	thank app	Positive	App Store	7/15/23 2:10	Najeeb Almuhawes	7/15/23 2:10	Rate				en	sa	0	0	0
App Store	Alinma-Bank	7bb2f287-e5e7-4a0b-a78c-e062b0f4a2dd	Alinma one of the best bank in Kingdom of Saudi Arabia ðð¤ð	en	alinma one best bank kingdom saudi arabia	Positive	App Store	1/31/22 7:21	Yunu*hala	1/31/22 7:21	Alhamdulillah				en	sa	0	0	0
App Store	Alinma-Bank	58782b98-b877-4af6-9040-573b122b4d95	Thanks alot ð.	en	thank alot	Positive	App Store	11/29/22 2:27	yuioplkjhgyuiop	11/29/22 2:27	Inma for ever ❤️				en	sa	0	0	0
App Store	Alinma-Bank	8c0a6e7a-f759-427c-8b47-2e38c732252a	Good application	en	good application	Positive	App Store	5/23/22 10:52	Fahad mh	5/23/22 10:52	👍				en	sa	0	0	0
App Store	Alinma-Bank	0cc371f5-2286-48cd-b730-7b909ca45805	Good service and good stap	en	good service good stap	Positive	App Store	9/29/22 23:48	janikhan swat	9/29/22 23:48	Serves				en	sa	0	0	0
App Store	Alinma-Bank	eaddedc8-0b76-48d7-82b1-2004e43c7dfe	Very good service Alinma Bank Application.	en	good service alinma bank application	Positive	App Store	8/15/22 8:12	abdulhaleemraydan	8/15/22 8:12	ABDUL HALIM TALUKDER				en	sa	0	0	0
App Store	Alinma-Bank	0bab1e98-f0f0-492a-82fd-015df8295db0	Best bank ever in Saudi Arabia	en	best bank ever saudi arabia	Positive	App Store	10/21/22 9:10	abdullahhz39	10/21/22 9:10	Z				en	sa	0	0	0
App Store	Alinma-Bank	a0419c8c-0e15-439a-8c2c-5dff44ac5d16	very nice	en	nice	Positive	App Store	2/28/23 10:38	ناصر سعيد	2/28/23 10:38	very good				en	sa	0	0	0
App Store	Alinma-Bank	bf99fb74-566d-49a0-876f-53c7512df6ed	Very good ðð»	en	good	Positive	App Store	9/17/23 19:57	الاصيلة	9/17/23 19:57	Nice				en	sa	0	0	0
App Store	Alinma-Bank	f40950bb-0daa-43ac-a2be-7ace559d03aa	Nice	en	nice	Positive	App Store	1/22/22 10:59	Baroud mohammed	1/22/22 10:59	Nice				en	sa	0	0	0
App Store	Alinma-Bank	0b22f2d0-3d6c-4dc4-b88e-ce4d76175383	Good sarvic	hi	good sarvic	Positive	App Store	3/23/22 19:26	usman gani chaudhary	3/23/22 19:26	USMAN				en	sa	0	0	0
App Store	Alinma-Bank	4219c786-3de7-46a4-addc-d4406511d04d	Amazing	en	amaze	Positive	App Store	6/20/23 4:43	Abo Hanan 1992	6/20/23 4:43	Great				en	sa	0	0	0
App Store	Alinma-Bank	b1b51b6e-7054-4596-b4fa-8e0f1e38997e	The bank's services are excellent.	und	bank service excellent	Positive	App Store	2/2/23 19:37	السلمان محمد	2/2/23 19:37	خدمات المصرف ممتازة				en	sa	0	0	0
App Store	Alinma-Bank	2a95d749-eeea-40da-bf2d-94605bcb5f86	The application is easy and excellent. May God sustain it	und	application easy excellent may god sustain	Positive	App Store	12/27/22 12:01	ام المقبلين	12/27/22 12:01	تطبيق سهل وممتاز. الله يديمه				en	sa	0	0	0
App Store	Alinma-Bank	3ef18635-30db-48bc-bdb9-38eee5123146	More luxurious than Al Rajh	und	luxurious al rajh	Positive	App Store	11/30/22 11:03	bädër...	11/30/22 11:03	أفخم من الراجحي				en	sa	0	0	0
App Store	Alinma-Bank	3f52d6a1-99fd-4362-a316-8094864e7e65	Nice appððð	en	nice app	Positive	App Store	10/3/22 16:38	vhines80	10/3/22 16:38	Alinma				en	sa	0	0	0
App Store	Alinma-Bank	bc8810e3-f1f7-4740-98d3-9b667b2c82a6	Fantastic	en	fantastic	Positive	App Store	6/11/23 10:04	Mohammad Mujahid.	6/11/23 10:04	Very easy to every thing.mind blowing bank app				en	sa	0	0	0
App Store	Alinma-Bank	83289e69-d26b-4ab7-bd5e-b35a813f36e6	Good good	en	good good	Positive	App Store	5/8/22 15:15	ناصربوصالح	5/8/22 15:15	Good good				en	sa	0	0	0
App Store	Alinma-Bank	cdf4a9b3-8b68-4b2b-8f3a-1defb2bf560d	I love ðð®ð³ð¸ð¦ðððððððððððððððððð¸ð¦ðð®ð³ðð®ð³ððððð	en	love	Positive	App Store	4/12/22 20:13	Abdallah shams	4/12/22 20:13	Beautiful service				en	sa	0	0	0
App Store	Alinma-Bank	ad819063-e35d-48cd-a7cc-8c90d487daa4	I have used so many bank apps, local and international. This app has been the best I have ever used. simple, efficient, does exactly what I want to do. Since I downloaded the app, more than 2years ago, I have not visited the branch, not even once.	en	use many bank apps local international app best ever use simple efficient exactly want since download app years ago visit branch even	Positive	App Store	3/10/22 11:16	Musleh, MH	3/10/22 11:16	Very good app.				en	us	0	0	0
App Store	Alinma-Bank	e90ff00e-e8c6-4e7d-9613-53c1327b2b4b	I would like to see my creativity for the app design. Though its very easy and 100% secure but more color more icons, market for example it will attract more people with offers etc.	en	would like see creativity app design though easy secure color icons market example attract people offer etc	Positive	App Store	5/2/23 4:13	AdZole	5/2/23 4:13	App’s design				en	us	1	0	0
App Store	Alinma-Bank	bb078c11-4a1e-44da-aa07-a2b48f73d752	Thanks for everything for your services	en	thank everything service	Positive	App Store	2/5/22 8:05	alnudyan	2/5/22 8:05	Thanks				en	us	0	0	0
App Store	Alinma-Bank	40a6a837-b44e-43e9-9579-f950a4c5391a	Great easy services	en	great easy service	Positive	App Store	8/2/23 14:38	Tito ya Tito	8/2/23 14:38	Great				en	us	0	0	0
App Store	Alinma-Bank	d9bc0ddb-858f-49b2-ad1f-e96eed660188	Very good , excellent	und	good excellent	Positive	App Store	7/11/22 23:41	Saudsaud	7/11/22 23:41	Very good , excellent				en	us	0	0	0
App Store	Alinma-Bank	31011570-83f9-492b-b402-42069169748b	Perfect	en	perfect	Positive	App Store	5/8/23 21:13	jnmlnnj	5/8/23 21:13	Masha allah				en	us	0	0	0
App Store	Alinma-Bank	468ad54c-8fd3-4a0d-985e-d54f7891089a	Best bank app	en	best bank app	Positive	App Store	3/27/23 5:49	Tareq hamad	3/27/23 5:49	Amazing				en	us	0	0	0
App Store	Alinma-Bank	6a8d795a-3f32-4d9a-95e2-c34e7a40bfa9	very excellent	fa	excellent	Positive	App Store	9/2/23 6:38	شرايع المجاهدين	9/2/23 6:38	شرايع المجاهدين				en	sa	0	0	0
App Store	Alinma-Bank	fca895ce-cd7d-4c93-a8e5-e885594754e6	easy application	fa	easy application	Positive	App Store	10/14/22 10:25	mansour 500	10/14/22 10:25	تطبيق سهل				en	sa	0	0	0
App Store	Alinma-Bank	19c5b100-a2fc-4994-a6e4-e4bccc8431ad	One of the best Saudi electronic banks	fa	one best saudi electronic bank	Positive	App Store	9/2/22 2:01	ابواحمد هاني	9/2/22 2:01	من افضل البنوك السعودية الالكترونية				en	us	0	0	0
App Store	Alinma-Bank	098400df-e014-43d9-9ced-f3f7b30d136b	Easy to use and fast	ur	easy use fast	Positive	App Store	12/27/22 16:30	Ffgtbytgbhygb	12/27/22 16:30	سهل في الاستخدام وسريع				en	sa	0	0	0
App Store	Alinma-Bank	23a688ab-7ea4-4ad5-a50b-9c657845122f	A nice application and a respectable bank, the ease of opening an account and entering the application impressed me a lot, especially the PIN for accessing the application.	ur	nice application respectable bank ease open account enter application impress lot especially pin access application	Positive	App Store	1/7/22 12:11	n.alqrine	1/7/22 12:11	تطبيق جميل ومصرف محترم سهولة فتح حساب ودخول تطبيق اعجبني كثير خاصة رقم السري لدخول التطبيق.				en	sa	1	0	0
App Store	Alinma-Bank	8cfbfe88-e1c4-40dc-84a9-406de25e7a0e	The application is very easy and comfortable, thank you Al Inma Bank.	ur	application easy comfortable thank al inma bank	Positive	App Store	9/25/22 11:01	الأمل الغائب	9/25/22 11:01	التطبيق جدا سهل ومريح شكرا بنك الإنماء				en	us	0	0	0
