# Supplementary material for: Retrieval-augmented generation analysis of user reviews in Saudi mobile banking apps: a comparative user experience study of iOS and Android
Source: PeerJ journal article supplement (doi:10.7717/peerj-cs.3565), 2026-02-06
Supplement: iOS.zip [file aljazira-smart_final.xlsx]

## Sheet: Sheet 1 - aljazira-smart_final
aljazira-smart_final
source	review_id	user_name	review_date	review_title	developer_response	developer_response_date	thumbs_up	language_code	country_code	app_name	review_description	developer_response_date	thumbs_up	language_code	country_code	en	cleaned_reviews	Sentiment	ï»¿source	Satisfaction	Effectiveness	Efficiency
App Store	65898f70-c980-4284-99e9-05cdb6d100c2	ahmed alsaif	11/24/22 17:30	تطبيق سيء				en	ae	aljazira	An application that is one of the worst applications always freezes.			en	ae	ar	application one bad applications always freeze	Negative	App Store	1	0	1
App Store	878bfde9-36f7-4faa-af14-b88eda4ce78a	Drfudo	6/20/23 7:31	No privacy!				en	ca	aljazira	Why is it required to enable location services to use the app? Remember, youâre just a bank app. You donât need to know where your costumersâ homes and locations are in order to provide service.			en	ca	en	require enable location service use app remember youre bank app dont need know costumers home locations order provide service	Neutral	App Store	1	0	0
App Store	c90ab293-0190-4c35-a062-28865cbd7c52	Mohdsikkk	9/13/23 5:44	Good service				en	in	aljazira	Thank you very much for the service of Al Jazeera Bank, you resolved my stuck money within 24 hours. Thank you. Good service			en	in	en	thank much service al jazeera bank resolve stick money within hours thank good service	Positive	App Store	0	0	0
App Store	c6b61835-0215-4fe7-8ebb-ccaedfc636a3	rahmanvavas	2/13/22 11:16	Worst bank				en	in	aljazira	Bad customer service ever seen in my life, only have bad experience closed my account			en	in	en	bad customer service ever see life bad experience close account	Negative	App Store	1	0	0
App Store	8350b233-ed8a-421d-a5e2-7c77f87be6b8	Hecz20	9/6/23 15:30	Local transfer failed				en	ph	aljazira	Your transfer didnât went through or unsuccessful but they will deduct it to your daily limit. So, you cannot transfer again on the same date. Really frustrated in this kind of error. Need more system innovation.			en	ph	en	transfer didnt go unsuccessful deduct daily limit transfer date really frustrate kind error need system innovation	Negative	App Store	1	1	0
App Store	f1817a6c-2bc4-46d7-8515-54411373e144	teevhie	2/23/23 10:58	cant transfer				en	ph	aljazira	cant transfer money from fawri card to stc pay bills tru Sadad(no bills found matching the search area)			en	ph	en	cant transfer money fawri card stc pay bill tru sadadno bill find match search area	Negative	App Store	0	1	0
App Store	e3f0e0c8-2946-46e5-86af-1855003aeb50	aharubi	4/6/22 6:57	White Screen				en	sa	aljazira	When you open the app and come back after a while, youâre presented with a white screen (or blue in newer version) and nothing loads up. You have to close the app and open it again to load anything. Please fix the issue.			en	sa	en	open app come back youre present white screen blue new version nothing load close app open load anything please fix issue	Negative	App Store	0	1	0
App Store	09e40f36-4070-47d8-82b0-079de00dbeb1	Balhaddad	8/5/23 7:13	How can I change nickname of Saving account	{'id': 23100034, 'body': 'Dear Customer, Thank you for using AlJazira SMART. We apologize for any inconvenience caused, you may add a nickname to your account following the below steps: \r\n1-\tLogin to your account\r\n2-\tNavigate to Settings menu\r\n3-\tTap Account Configuration\r\n4-\tTap on the nickname field to add a nickname\r\n5-\tTap “Save”\r', 'modified': '2021-05-31T08:30:04Z'}			en	sa	aljazira	Aljazira online services is improving so much , better than other banks . But I wonder how can I change saving accounts nickname?			en	sa	en	aljazira online service improve much good bank wonder change save account nickname	Positive	App Store	0	0	0
App Store	72906daf-ff14-435e-ae3f-36fa386d88f3	HASHIM 111111	10/4/22 11:47	Very good application we have used Jazira smart for all transactions,SADAD,etc.				en	sa	aljazira	Perfect application and I have used for all transactions.			en	sa	en	perfect application use transactions	Positive	App Store	0	0	0
App Store	4f5b541a-aedb-4bc2-bd6e-402654519b98	sqarziz	7/14/22 13:15	Currencies card				en	sa	aljazira	Some problem when I register for currencies card , i cant put my account ,please fix it.			en	sa	en	problem register currencies card cant put account please fix	Negative	App Store	0	1	0
App Store	427af76f-a203-4661-b87d-b702d45967ee	jaso@BAJ	11/10/22 13:44	JO				en	sa	aljazira	Application is too slow and get activated after a while at start and after words It is annoying and not expected to be as slow			en	sa	en	application slow get activate start word annoy expect slow	Negative	App Store	1	0	1
App Store	03d0da98-a745-4e35-8bf0-6ed095246608	Nagaty86	5/11/23 20:16	Need to add Car Leasing				en	sa	aljazira	The application is great but it would be better if you add the Car Leasing information under the financing menu.			en	sa	en	application great would good add car lease information finance menu	Positive	App Store	1	1	0
App Store	a3cba69d-efa6-4925-aa6a-df7b7ed58a41	GoonerAmaan	1/15/23 9:15	Fawri log in issue				en	sa	aljazira	Whenever I tried to open Fawri to add beneficiary the app show error and logs out. Please fix the issue.			en	sa	en	whenever try open fawri add beneficiary app show error log please fix issue	Negative	App Store	0	1	0
App Store	79b7f117-ef6a-40cd-bfe9-928e2d78d6ab	guest riyadh	10/2/22 13:52	Excellent App				en	sa	aljazira	Excellent App Has everything needed Easy to use			en	sa	en	excellent app everything need easy use	Positive	App Store	0	0	0
App Store	8ad0ecce-3706-4f5c-9b32-93d89c85e561	f2314678	1/27/22 4:47	White screen				en	sa	aljazira	When I open the app the screen is white and I canât find anything or do anything so I am stuck.			en	sa	en	open app screen white cant find anything anything stick	Negative	App Store	0	1	0
App Store	53cc7413-cf4f-434c-8a9f-26e92694d3b3	Raja mudassar Azam	9/10/23 0:20	Update				en	sa	aljazira	Today i hot Ã notifications for update the app when i go for update it take to time more then 15 mint now completed but still not yet update plz solve this issue			en	sa	en	today hot notifications update app go update take time mint complete still yet update plz solve issue	Negative	App Store	0	1	1
App Store	b161c0f1-bf72-4f07-8f8a-5374d0d788d0	it is need to fix	2/27/22 8:41	Connectivity issue				en	sa	aljazira	App is not working because of connectivity issue			en	sa	en	app work connectivity issue	Negative	App Store	0	1	0
App Store	504f877d-cc94-4403-81b5-d48e51534073	Lufffffffy7	2/1/23 18:37	Brilliant App!				en	sa	aljazira	Super good and user friendly application			en	sa	en	super good user friendly application	Positive	App Store	0	0	0
App Store	00b47adc-9635-4798-8502-dd4c6c342086	NahshadAlam	2/23/23 16:11	Please Add IDFC FIRST Bank				en	sa	aljazira	Dear Sir/ Madam, Please Add IDFC FIRST Bank instead of IDFC BANK LIMITED, Bank name change and its not showing in Fawri new beneficiary list.			en	sa	en	dear sir madam please add idfc first bank instead idfc bank limit bank name change show fawri new beneficiary list	Neutral	App Store	1	1	0
App Store	c799f48d-0365-4d27-bb66-91805195880a	عثمان آل هادي	5/12/23 14:25	Ridiculous				en	sa	aljazira	It refuses to sign-in, and after struggling to fo that it throws me out for the reason (too many attempts to sign-in) Fix the bug			en	sa	en	refuse signin struggle fo throw reason many attempt signin fix bug	Negative	App Store	0	1	0
App Store	a4c35224-748a-4db9-8f1f-e4890bbc1a72	iMukhlid	2/27/22 8:59	Application not working				en	sa	aljazira	report a current issue in the application, please update			en	sa	en	report current issue application please update	Neutral	App Store	0	1	0
App Store	21f0292a-a905-4bf8-a4a9-0b248f81765a	Mamx	7/6/23 14:22	To many bugs and issue				en	sa	aljazira	Too many bugs and issues need to be fix			en	sa	en	many bug issue need fix	Negative	App Store	0	1	0
App Store	23bf3a27-982a-4181-8f6a-ebb3531732a7	Brkan505 KSA	8/14/22 0:28	Losing time				en	sa	aljazira	I take 30 min to open account but at the end the app showing i have to visit the bank , this is not good			en	sa	en	take min open account end app show visit bank good	Negative	App Store	0	0	0
App Store	f0819140-c09a-4285-9112-e9e742eaad91	abuhusam118	4/11/22 10:18	Still not supported				en	sa	aljazira	Only one time use and after I have to download it again			en	sa	en	one time use download	Neutral	App Store	0	1	0
App Store	0233e24d-e50b-4d24-964a-81c49d053238	Asd110073	6/22/23 16:28	iPhone 6 not working				en	sa	aljazira	iPhone 6 not working need to fix the issue			en	sa	en	iphone work need fix issue	Negative	App Store	0	1	0
App Store	36bc670b-bc4e-429e-89be-48c75da9e80b	ahmaddd241	4/3/22 9:12	App doesn’t work with the new update				en	sa	aljazira	With updating the app, it is now doesnât work at all.. canât get access.			en	sa	en	update app doesnt work cant get access	Negative	App Store	0	1	0
App Store	06eb1b0a-a843-4984-93e8-11aafc8ab916	Husحسام	6/20/23 16:00	Hussam				en	sa	aljazira	After update, app is too slow and session get expired due to time out			en	sa	en	update app slow session get expire due time	Negative	App Store	0	0	1
App Store	ed937321-c0e0-4df1-af60-a3f686987460	Asmawh	6/24/23 22:53	Updated App				en	sa	aljazira	The updated version is stupid enough to make you angry			en	sa	en	update version stupid enough make angry	Negative	App Store	1	0	0
App Store	cb9f5171-7550-4116-a0c3-b7698b732316	kkkkkkaaannn	12/26/22 15:36	Dear Aljazeera team				en	sa	aljazira	How can i see the iban number and how i tranfer money from other account			en	sa	en	see iban number tranfer money account	Neutral	App Store	0	1	0
App Store	9082a169-9db7-4a8e-bfcd-3ac0aae4b145	2rjack	6/20/23 18:12	aljazira smart. retrieving information issue’s				en	sa	aljazira	2 times they give an update through app store but still not working. better to close my account in ajazirað			en	sa	en	time give update app store still work good close account ajazira	Negative	App Store	0	0	0
App Store	617aa053-a574-473d-8fb8-247d723868cc	HA!L	7/15/22 12:15	Poor app				en	sa	aljazira	The worst app ever			en	sa	en	bad app ever	Negative	App Store	1	0	0
App Store	5485ed9a-7bc7-4520-bf4d-451f6216c8c1	Traveler321	9/4/23 20:14	التطبيق لا يعمل إلا بعد تفعيل الموقع وهذا فيه انتهاك لخصوصية المستخدم				en	sa	aljazira	The application does not work unless the location is activated, and this violates the user's privacy.			en	sa	ar	application work unless location activate violate users privacy	Negative	App Store	0	1	0
App Store	9759e822-27b6-45f3-847a-e6a804a7386d	إليخادرو	7/18/23 6:18	مشاركة الموقع				en	sa	aljazira	Why doesn't the program work unless I activate the website service and share my site?! This is a breach of client privacy and it shouldn't be mandatory.			en	sa	ar	doesnt program work unless activate website service share site breach client privacy shouldnt mandatory	Negative	App Store	0	1	0
App Store	3ddc25f2-7586-4701-8f6a-1db459735b1d	New dream kingdom 229	6/23/23 17:25	التحديث الجديد سيء				en	sa	aljazira	The new update violates the client's privacy! Why can't I open the application without sharing my location? Please change this feature and limit it to the registered device, password, activation code, and fingerprint for security purposes!			en	sa	ar	new update violate clients privacy cant open application without share location please change feature limit register device password activation code fingerprint security purpose	Negative	App Store	0	1	0
App Store	524b3f5c-83ba-4236-979b-c4f2d4455b43	uskajvyuvtukcc	6/20/23 3:08	سيء				en	sa	aljazira	In order to benefit from the bank's services, I have to activate the website. But why would the lack of activating the website prevent me from benefiting from the services? If the problem with the banks continues, there are many other banks.			en	sa	ar	order benefit bank service activate website would lack activate website prevent benefit service problem bank continue many bank	Neutral	App Store	1	1	0
App Store	68a46d1d-d7f5-4d3c-b72c-f59dfe0234bf	xami333	5/13/22 18:31	تطبيق فاشل				en	sa	aljazira	You have to download it every time from scratchðð» .. JAR FAIL			en	sa	ar	download every time scratch jar fail	Negative	App Store	0	1	0
App Store	4e1e0fa1-9782-481b-8f2a-937c0e3bb921	عميل رقم ٢٠٠٣	4/29/22 0:57	الفواتير				en	sa	aljazira	When I come to pay the electricity bill, they say choose an account, but when I choose an account, there is no account available!			en	sa	ar	come pay electricity bill say choose account choose account account available	Neutral	App Store	0	1	0
App Store	9b881015-13b3-4a1f-a3bc-79601289974f	salqhtani	4/27/22 2:34	بطيء جداً				en	sa	aljazira	The application is slow and crashes often.			en	sa	ar	application slow crash often	Negative	App Store	1	1	1
App Store	a37af7da-f51d-4a5c-9085-d04d45bf5b65	alsubaaaa	4/26/22 5:06	Bad				en	sa	aljazira	Very bad and impractical.			en	sa	ar	bad impractical	Negative	App Store	1	0	0
App Store	0ee9e055-9d9d-4050-9724-f399eee924b2	H4TEM	4/22/22 20:23	تحديثات كثيرة لأسباب تافهه				en	sa	aljazira	Unbelievable amount of updates! Unbelievable how every occasion leads to users being forced to update. Once a day we start, once Ramadan Kareem and for sure by the end of Ramadan you make us update. Every year and you are well and so on. You are a bank.. and I open the app for work, so please make the updates heavier and focus on things that are really important.			en	sa	ar	unbelievable amount update unbelievable every occasion lead users force update day start ramadan kareem sure end ramadan make us update every year well bank open app work please make update heavy focus things really important	Negative	App Store	1	0	1
App Store	b0e352b5-2598-4da9-bfcd-2c047953c392	Ali asiry	4/11/22 9:58	تطبيق البنك				en	sa	aljazira	When you enter the application, a white or blue page appears and the application hangs on this. This is a very bad application. This is the only bank where you encounter this problem.			en	sa	ar	enter application white blue page appear application hang bad application bank encounter problem	Negative	App Store	1	1	1
App Store	52d14163-4d40-4a66-9cf5-16b2feb4e5ca	Bader668	4/6/22 16:55	تطبيق سيء				en	sa	aljazira	Very bad application.			en	sa	ar	bad application	Negative	App Store	1	0	0
App Store	789bd773-2760-4e5e-961b-f431d0e85951	BAJ Client	4/2/22 14:33	تسديد المخالفات				en	sa	aljazira	The application does not work for paying traffic fines.			en	sa	ar	application work pay traffic fin	Negative	App Store	0	1	0
App Store	e9f7d0e8-917a-490f-b13f-93011129b382	المتربص	3/30/22 21:15	اسوء تطبيق بنك في السعوديه				en	sa	aljazira	The Al-Hazira application is very bad and does not follow the latest updates, and there are no services available on it.			en	sa	ar	alhazira application bad follow late update service available	Negative	App Store	1	0	0
App Store	88ef17ec-18d7-498c-9dc5-ff48f4f99a54	ظءءءء	2/27/22 17:13	التطبيق لايعمل				en	sa	aljazira	One of the worst, worst, worst applications you can use. It's terrible, beyond imagination. ðð»			en	sa	ar	one bad bad bad applications use terrible beyond imagination	Negative	App Store	1	0	0
App Store	bb042056-4a94-4127-95ff-1bbc78d67a8e	وكا وكا ابو	1/19/22 6:44	شاشه بيضاء بالتطبيق				en	sa	aljazira	Unfortunately, the application always freezes and a white screen appears. Despite contacting them, they did not help me, even though I have a new and updated iPhone. It is very strange.			en	sa	ar	unfortunately application always freeze white screen appear despite contact help even though new update iphone strange	Negative	App Store	1	0	1
App Store	1235505a-9872-4d80-836b-f101f47e7f5c	m1nsoor	6/20/23 17:14	التحديث الأخير يعلق التطبيق باستمرار				en	sa	aljazira	I hope to address the excessive comments in the latest update, as well as the use of unclear fonts and colors. We are overwhelmed with the light gray color. There is no feature to enlarge the font.			en	sa	ar	hope address excessive comment late update well use unclear fonts color overwhelm light gray color feature enlarge font	Negative	App Store	1	0	0
App Store	a21c3bb2-2388-43b3-8b02-7377e7fb9abe	Muhannna	9/12/23 19:25	اضافة ايقونة سداد جز من التمويل				en	sa	aljazira	Adding the installment payment icon, whether for one, two, or more installments, according to the customer's preference and the availability of funds, either from the total financing amount or upfront, according to the customer's preference. This service is available in the Bank Al Bilad application.			en	sa	ar	add installment payment icon whether one two installments accord customers preference availability fund either total finance amount upfront accord customers preference service available bank al bilad application	Neutral	App Store	0	1	0
App Store	f3fc8d00-dc5c-4f6b-90e2-807bc3ac4ed5	اسلام سعد	8/21/23 10:32	لا يمكنني اضافة مستفيد جديد				en	sa	aljazira	There is no call from the bank to add a new beneficiary, and an error message appears.			en	sa	ar	call bank add new beneficiary error message appear	Negative	App Store	0	1	0
App Store	dcbfa832-50fe-4398-b38e-f1b2b166295a	binothman	7/4/23 20:32	يحتاج إلى تطوير				en	sa	aljazira	The application is still undeveloped and primitive, and it has slow browsing. It is possible to benefit from other banks such as Al Rajhi and Alinma, which have made significant advancements in terms of speed, design, and performance.			en	sa	ar	application still undeveloped primitive slow browse possible benefit bank al rajhi alinma make significant advancements term speed design performance	Neutral	App Store	1	0	1
App Store	e682beba-81a9-4c18-80c4-235dbc5fabb5	فروسسسي	6/21/23 23:39	التحديث الاخير				en	sa	aljazira	After the latest update, the program has become slow and does not download. Furthermore, the savings account is displayed on the homepage, even if I disable it from the settings it does not disappear. In short, the application has become very bad.			en	sa	ar	late update program become slow download furthermore savings account display homepage even disable settings disappear short application become bad	Negative	App Store	1	1	1
App Store	adbc99d1-6798-443e-8b97-bd5f74cf5246	Aqeel٠٢	6/13/23 8:59	الخط صغير جدًا				en	sa	aljazira	The font used in the application is very small, making it difficult to read. There should be an option to enlarge the font.			en	sa	ar	font use application small make difficult read option enlarge font	Negative	App Store	1	0	0
App Store	51d79cf5-fc26-4bfa-bf5e-1f1bdb8c5f1a	فاشل بعد التحديث الاخير	11/17/22 1:48	تحسين صفحة العمليات				en	sa	aljazira	We hope that you improve the account operations page and make it easier and clearer, like the rest of the banks.			en	sa	ar	hope improve account operations page make easy clear like rest bank	Positive	App Store	1	0	0
App Store	9a3eaf3a-f86a-4886-9366-181cd9b131c3	ابن الصصحراء	6/9/23 17:06	Very bad ||| سيئ جداً				en	sa	aljazira	Very bad			en	sa	ar	bad	Negative	App Store	1	0	0
App Store	8cbce901-3a4e-4e67-bc52-bab07cc709af	Hig soucer	5/11/23 11:10	سيء				en	sa	aljazira	One of the worst programs is your service, it's like garbage. We call to solve a problem and the employee says it's not my problem. Why do you hire people who are unable to solve the problems they face when working with you or buying from you?			en	sa	ar	one bad program service like garbage call solve problem employee say problem hire people unable solve problems face work buy	Negative	App Store	1	1	0
App Store	795265fe-f709-4cbe-ad26-de50b019727c	وربييي مرررههه بطلل	5/3/23 4:05	الجزيره				en	sa	aljazira	Better than Al Rajhi			en	sa	ar	good al rajhi	Neutral	App Store	0	0	0
App Store	db167c60-0140-4e36-a8c5-228146fbf78f	omar10x4	4/19/23 4:35	اتمنى في اقل من نجمة				en	sa	aljazira	The application needs a comprehensive change. Look at Al Rajhi and Alinma and how smooth, convenient, and feature-rich their applications are. As for your application, it makes me feel frustrated and confused. I don't know where to go or what to do. Please develop the application, may God have mercy on your parents.			en	sa	ar	application need comprehensive change look al rajhi alinma smooth convenient featurerich applications application make feel frustrate confuse dont know go please develop application may god mercy parent	Negative	App Store	1	0	0
App Store	292bfdce-d60b-4851-8751-03cf3a3f3e35	زعوري	4/6/23 2:50	التطبيق لا يعمل ع ايفون 7 بلاس				en	sa	aljazira	He refused to pay the fees even though it was free and I downloaded it on other devices. But it didn't work on his iPhone 7 Plus.			en	sa	ar	refuse pay fee even though free download devices didnt work iphone plus	Negative	App Store	0	1	0
App Store	dd9b3111-34da-4f99-92a5-6b80878192ea	❤️яoмη̵иτɪ̇c	1/28/23 17:57	برنامجكم متعب				en	sa	aljazira	It is not currently working on Wi-Fi.			en	sa	ar	currently work wifi	Negative	App Store	0	1	0
App Store	7f8a5857-7ad9-4f1e-915f-6eb0cb4750af	خوله ٥٣	1/28/23 8:49	ليه خربنا ايش السبب ادخل الحساب ابي اشوف كم في بالحساب مايدخل حتى رمز مايجب				en	sa	aljazira	Why did we mess up? What is the reason? I tried logging into my account to see how much I have in my account, but it doesn't let me enter, not even the code.			en	sa	ar	mess reason try log account see much account doesnt let enter even code	Negative	App Store	0	1	0
App Store	01445696-09e3-42da-88be-1e9402e2417f	abo mohammed 0122	12/25/22 1:50	خساره تقييمكم				en	sa	aljazira	Many stars upon you.			en	sa	ar	many star upon	Positive	App Store	1	0	0
App Store	f75b83c0-1497-4881-849d-b0bf0ab37748	تركي المشاري	12/22/22 6:54	التطبيق يرفض التحديث فالمتجر ولا استطيع الدخول مالحل				en	sa	aljazira	I am unable to access the application and complete my banking transactions.			en	sa	ar	unable access application complete bank transactions	Negative	App Store	0	1	0
App Store	9a484814-61fd-4b79-b3be-081e4b6f0358	Sami Bashawri	12/16/22 12:36	التطبيق ممتاز				en	sa	aljazira	But when transferring, we need it not to stop at just one transfer or transferring between my accounts. There should be an icon for requesting another transfer or deposit, instead of going back to the beginning and starting anew... Thank you and your application is special and easy to use.			en	sa	ar	transfer need stop one transfer transfer account icon request another transfer deposit instead go back begin start anew thank application special easy use	Positive	App Store	0	0	0
App Store	a678b32c-ce8a-4e11-b015-b06ec7513c7e	Maliknzz	10/31/22 8:47	التطبيق بعد التحديث الجديد ممتاز				en	sa	aljazira	The application is very excellent after the new update. It is easy, smooth, and has a beautiful interface. The bank is to be thanked for it.			en	sa	ar	application excellent new update easy smooth beautiful interface bank thank	Positive	App Store	0	0	0
App Store	f1342dca-9b0d-4c9b-a12b-26c4d2bc9c08	ابو اياد ١٩٢٨٣٧٤٦	10/28/22 13:36	الخبر				en	sa	aljazira	The application is slow and freezes when paying with a Visa card.			en	sa	ar	application slow freeze pay visa card	Negative	App Store	0	0	1
App Store	effd446a-6090-4ad1-96be-981562c311db	Dosapponted	6/14/22 16:07	اقتراح اضافة				en	sa	aljazira	I suggest adding the approved or pending authorizations that are waiting to be submitted to the merchant in the (Operations) department of the credit card.			en	sa	ar	suggest add approve pending authorizations wait submit merchant operations department credit card	Neutral	App Store	0	1	0
App Store	981b563f-06fe-4302-9dee-bbb4fda18aaa	ابو عزوز ٤	10/21/22 5:49	اسوء تطبيق !!!				en	sa	aljazira	Where are the bank administration and officials?			en	sa	ar	bank administration officials	Neutral	App Store	0	1	0
App Store	6b35dc3c-40b4-4132-b6fb-164fd5d9c995	almateq49	10/3/22 1:09	التطبيق نوعاً ما جيد	{'id': 22848782, 'body': 'عزيزي نعتذر عن اي صعوبات واجهتك خلال استخدام خدماتنا.. الرجاء تحديث التطبيق وفي حال استمرار الخطأ يمكنك التواصل معنا على الرقم 920006666 أو التواصل عبر جميع منصات التواصل الإجتماعي لتتم خدمتك وأبشر بعزّك.', 'modified': '2021-05-17T10:23:05Z'}			en	sa	aljazira	More development is needed for ease of use.			en	sa	ar	development need ease use	Positive	App Store	1	0	0
App Store	3c61f056-0a38-4756-819a-2e7ab8e14323	salem437	8/25/22 8:02	تطبيق فاشل				en	sa	aljazira	The application is the worst and it constantly freezes.			en	sa	ar	application bad constantly freeze	Negative	App Store	1	0	1
App Store	e60ef2c7-bf7a-415a-897a-40244566a889	Saleh_DS	7/23/22 13:36	مشاكل كثيرة				en	sa	aljazira	You will face many problems if you are connecting to the internet using your mobile number. When you log in with facial recognition, a message appears on your mobile phone and the connection is cut off. When you try to access any page, it hangs and does not enter, so you are forced to close the application and then log in again. After logging in with facial recognition, you have to wait several s…			en	sa	ar	face many problems connect internet use mobile number log facial recognition message appear mobile phone connection cut try access page hang enter force close application log log facial recognition wait several second able access page thing happen transfer receive otp message wait dont wait application hang annoy embarrass customer especially front cashier place crowd example al rajhi bank applic…	Negative	App Store	1	1	1
App Store	5f0e0f50-3520-4a55-977f-b9cf3ca89437	wagand0007	7/22/22 14:45	زيادة الحد الائتماني مؤقتا كانت متوفرة				en	sa	aljazira	Dear valued brothers at Al-Jazira Bank, 1. Kindly reinstate the temporary credit limit increase service as it was before. 2. Please enable the option to convert transactions into installments through the application, as telephone communication is inconvenient, time-consuming for both you and the customers, and makes the customer feel uncomfortable. If the customer is eligible for installment conv…			en	sa	ar	dear value brothers aljazira bank kindly reinstate temporary credit limit increase service please enable option convert transactions installments application telephone communication inconvenient timeconsuming customers make customer feel uncomfortable customer eligible installment conversion would good make electronic process review specific department approve without need phone call thank	Neutral	App Store	1	1	0
App Store	acbdbf50-b07b-46ec-b10a-2632551181bd	bakhit101	6/17/22 11:22	تطبيق. يحتاج لمزيد بذل عنايه				en	sa	aljazira	The application has many comments, and it must be deleted and downloaded every three times of use, and the comment keeps reappearing. We hope that the issue will be resolved because it is causing many problems. Thank you for your commitment to developing the banking system.			en	sa	ar	application many comment must delete download every three time use comment keep reappear hope issue resolve cause many problems thank commitment develop bank system	Negative	App Store	0	1	0
App Store	9b07aad3-823e-4816-bb07-ac8f29a40ffd	يستحق التجربةً	6/8/22 23:08	لايوجد أستجابه				en	sa	aljazira	The application requires technical support.			en	sa	ar	application require technical support	Neutral	App Store	1	0	0
App Store	c7d97a01-fb05-4ba8-80ef-82c58cdb9e2a	htoome050	5/24/22 13:34	افضل مصرف				en	sa	aljazira	Their interaction is very easy and they don't complicate things, and they are clear with the customers.			en	sa	ar	interaction easy dont complicate things clear customers	Positive	App Store	1	0	0
App Store	761413a9-90b8-4f22-ba0f-c7ef61e8b8f0	بسام الرميلي	4/27/22 0:50	خلل فني				en	sa	aljazira	I cannot pay bills or make any payments from the account because there is no option under the "account selection" box.			en	sa	ar	pay bill make payments account option account selection box	Negative	App Store	0	1	0
App Store	473cbe74-e8b2-411f-b9b4-a728db8005dd	andualz	4/23/22 22:48	حساب الادخار				en	sa	aljazira	The savings account keeps disappearing between periods, and then it reappears and I get caught up in it. Sometimes I want to withdraw, but I can't because of this problem.			en	sa	ar	savings account keep disappear periods reappear get catch sometimes want withdraw cant problem	Negative	App Store	0	1	0
App Store	19ecf371-2d54-4405-9e7d-a35d4b070707	راضي احمد	4/13/22 12:30	ضعيف جداً				en	sa	aljazira	The body he designed is very weak and frail, unable to confront challenges.			en	sa	ar	body design weak frail unable confront challenge	Negative	App Store	1	0	0
App Store	78b79fb0-20b0-47f7-9282-b3b00a1880de	b o azoz	2/20/22 16:13	عدم تحديث الهوية الوطنية				en	sa	aljazira	Unfortunately, all banks are updating national identities through their application except for you, you force the customer to come to the bank, which is difficult for me as I am in an area that is not close to the bank, so I hope you consider modifying and developing the application to support updating the national ID through the application instead of the inconvenience to the customer to come in…			en	sa	ar	unfortunately bank update national identities application except force customer come bank difficult area close bank hope consider modify develop application support update national id application instead inconvenience customer come person thank	Negative	App Store	1	0	0
App Store	8e24e14e-a3cf-4a33-9b37-15f5b6b2325c	Lordmeem	1/27/22 8:00	التطبيق لا يعمل				en	sa	aljazira	The application has been not working since morning until now.			en	sa	ar	application work since morning	Negative	App Store	0	1	0
App Store	44c3454f-8786-4b6e-884c-0137f0c3104e	Alrwsy97	1/10/22 17:09	معلق				en	sa	aljazira	I cannot access my bank account. Corporate accounts cannot log in. I have been trying for a few days. Please solve the problem as soon as possible, or I will go to an alternative bank.			en	sa	ar	access bank account corporate account log try days please solve problem soon possible go alternative bank	Negative	App Store	0	1	0
App Store	4389143a-f4e5-4b9d-b7a7-3e222fdafa74	Turki sultan	1/6/22 20:39	التحديث الاخير على الايباد				en	sa	aljazira	After the latest update, the application on the iPad Pro cannot be rotated horizontally anymore. It can only be used with the screen in portrait mode.			en	sa	ar	late update application ipad pro rotate horizontally anymore use screen portrait mode	Neutral	App Store	0	1	1
App Store	aebae6ec-00c1-4655-8c85-4f089402fde4	Elyas mehdar	10/17/22 15:56	Log in issue				en	sa	aljazira	When i put in my username and password this shows up Technical Problem An error has occurred. Please, try again later.			en	sa	en	put username password show technical problem error occur please try late	Negative	App Store	0	1	0
App Store	1d08b8c8-c8d8-4c93-b84f-906078988e0f	Toti677	7/3/22 10:31	Atif Ajlan				en	sa	aljazira	This is a grate update.Thank you			en	sa	en	grate updatethank	Neutral	App Store	1	0	0
App Store	9675f956-3cb7-4958-a9ad-3460179d115f	Dr Sadig A Dahlan	2/27/22 11:15	Bad IOS Bank app				en	us	aljazira	Salam to all. This app is very slow plus itâs always freezing. Sadly if this problem will not be fixed I will change the bank because all my work is on the app. Dr SD.			en	us	en	salam app slow plus always freeze sadly problem fix change bank work app dr sd	Negative	App Store	0	1	1
App Store	cb06733b-8fe8-418a-a998-bdfce66e6894	عميل ذهبي في الجزيره	5/1/23 2:47	الخط والايقونات صغيره				en	us	aljazira	"The font is too small, it is almost impossible to see it. I request enlarging it and making it a bold black font so it can be visible on small mobile screens. Additionally, some icons disappear due to the small font size and distance. Please redesign the interface with larger fonts."			en	us	ar	font small almost impossible see request enlarge make bold black font visible small mobile screen additionally icons disappear due small font size distance please redesign interface large fonts	Negative	App Store	1	1	0
App Store	aa033c48-a080-42e9-926d-862ab984dfda	احمد بن فهد	7/3/23 0:53	تحديد الموقع				en	us	aljazira	The bank must cancel the request to track the location during usage as it is a violation of the customer's privacy, and this action is declined.			en	us	ar	bank must cancel request track location usage violation customers privacy action decline	Negative	App Store	0	1	0
App Store	31800fd5-2e87-43dd-a802-387e5d3a19b3	MATTAR97	6/21/23 15:02	خاصية الموقع				en	us	aljazira	Why do I have to enable location feature in order to use the app? Come on, stop annoying us even more, we're already suffering enough because of this rotten bank.			en	us	ar	enable location feature order use app come stop annoy us even already suffer enough rotten bank	Negative	App Store	1	1	0
App Store	1da874c7-80c1-4697-9585-b823afc63b80	MJq73	6/9/23 23:25	بطاقات مدى				en	us	aljazira	Why is there no option to request a Mada card directly from the application, and have it delivered without visiting customer service?			en	us	ar	option request mada card directly application deliver without visit customer service	Negative	App Store	0	1	0
App Store	54cadd3e-eced-49c8-ae74-0bc2aeef4d3b	لعبة زي الزفت	2/27/22 7:16	التحديث الاخير صفحة يوم بيدينا				en	us	aljazira	Last update, there is a category called "application malfunction"			en	us	ar	last update category call application malfunction	Negative	App Store	0	1	0
App Store	e477eece-f2d0-4895-a067-f76b4edd6399	Aziz_1991	7/20/22 15:54	يوجد مشكلة ازلية في التطبيق وهي البطىء الشديد				en	us	aljazira	The application is suffering from severe slowness, which is clearly evident to all users. I don't know why the existing customer reviews on the app store are not being taken into consideration.			en	us	ar	application suffer severe slowness clearly evident users dont know exist customer review app store take consideration	Negative	App Store	0	0	1
App Store	d858533a-9ead-4574-80b8-41962427997a	A whab a	6/17/22 3:45	سيء للغاية				en	us	aljazira	It is extremely bad; I advise not to deal with Al Jazeera Bank and close your accounts with them.			en	us	ar	extremely bad advise deal al jazeera bank close account	Negative	App Store	1	0	0
App Store	f3f4708b-29dd-4921-b7e2-b25189215518	SlickO64	6/1/22 10:14	تطبيق سيئ				en	us	aljazira	Many times, I try to log into the application and the screen is empty, so I have to clear the application and redownload it again.			en	us	ar	many time try log application screen empty clear application redownload	Neutral	App Store	0	1	0
