# Supplementary material for: Retrieval-augmented generation analysis of user reviews in Saudi mobile banking apps: a comparative user experience study of iOS and Android
Source: PeerJ journal article supplement (doi:10.7717/peerj-cs.3565), 2026-02-06
Supplement: iOS.zip [file alrajhi-mobile_final.xlsx]

## Sheet: Sheet 1 - alrajhi-mobile_final
alrajhi-mobile_final
source	review_id	user_name	review_date	review_title	developer_response	developer_response_date	thumbs_up	language_code	country_code	app_name	review_description	en	cleaned_reviews	Sentiment	ï»¿source	Satisfaction	Effectiveness	Efficiency
App Store	bb047ac5-bbc1-4225-a654-c33ee311384e	Srijith Bahrain	6/30/22 17:58	Revolutionary Banking services				en	ae	alrajhi	At first I faced trouble accessing the banking app, but Al Rajhi made a great experience for mobile banking and I enjoy the benefits of insta services very much. Well done Al Rajhi Team	en	first face trouble access bank app al rajhi make great experience mobile bank enjoy benefit insta service much well do al rajhi team	Positive	App Store	1	0	0
App Store	184a298b-9b23-4ffd-b493-884604a2b001	kri7200	4/7/22 12:16	Transfer				en	ae	alrajhi	Easy to transfer money, to app to use	en	easy transfer money app use	Positive	App Store	0	0	0
App Store	cfc93663-7d66-432d-9807-368d47c7f883	Fatah538	2/5/22 11:15	Good bank				en	ae	alrajhi	Thank you for your easy services.	en	thank easy service	Positive	App Store	0	0	0
App Store	75bc11ea-b048-46e6-ba1e-13cbc7ae79cb	khalid.fa	2/1/22 11:43	Amazing				en	ae	alrajhi	Much easier and not complicated	en	much easy complicate	Positive	App Store	1	0	0
App Store	db857d27-c179-4ca1-83d8-d16ee6618cfa	Honest Reviewerz	7/2/23 15:41	Invasion of privacy				en	ae	alrajhi	This app started requiring your location to access it and wonât work anymore without allowing it to log your location. How is this allowed? Deleted.	en	app start require location access wont work anymore without allow log location allow delete	Negative	App Store	0	1	0
App Store	8be694f4-419f-4796-9727-8caf521c8d8e	Zizooooo92	12/6/22 18:04	Perfect and easy services				en	ae	alrajhi	Al Rajhi is the best bank in the world	en	al rajhi best bank world	Positive	App Store	0	0	0
App Store	828d278e-3ce0-4f4a-82ad-e1195783b5c9	Anil0809	4/28/22 8:05	Transfers				en	ae	alrajhi	alrajhi has best app	en	alrajhi best app	Positive	App Store	0	0	0
App Store	dbba946c-dfdf-4d45-8719-99dd5db48782	zafa mohammad amwar	5/12/22 9:11	bank				en	ae	alrajhi	its really amazing app and so nice and care full of costmar	en	really amaze app nice care full costmar	Positive	App Store	0	0	0
App Store	1d918e17-5ce1-4728-8051-55e6f0f48d98	Farsi Khan	5/9/22 10:01	Reviews				en	ae	alrajhi	ALHAMDU LILLAH we have this service.	en	alhamdu lillah service	Positive	App Store	0	1	0
App Store	a2f8eaad-ecd2-4976-ad24-a70610769368	b77rr	1/6/22 23:57	Waw				en	ae	alrajhi	Good bank	en	good bank	Positive	App Store	0	0	0
App Store	8b722a90-1095-454a-90a4-574c0664e23f	mislm	8/12/23 20:02	WoW you need to download THIS GREAT APP				en	ae	alrajhi	WOW THIS IS THE BEST APP I EVER SEEN BEFOR	en	wow best app ever see befor	Positive	App Store	0	0	0
App Store	10dda708-3a0b-41a3-84b5-06d822f2b6b4	chohan5555	5/2/22 18:20	👍				en	ae	alrajhi	ð	und		Neutral	App Store	0	0	0
App Store	14533a67-78d0-43be-9fe0-17e460aae31b	عبدالله♥️	8/30/23 5:33	شكرا لكم				en	ae	alrajhi	"You are the best program."	ar	best program	Positive	App Store	0	0	0
App Store	5b6fe3f2-a5cd-4143-acd6-7e58789a06b3	maqar uae	8/21/23 7:47	KHALED				en	ae	alrajhi	Thank you for the quality of your application.	ar	thank quality application	Positive	App Store	0	0	0
App Store	76342f73-5779-40ff-a42e-6f9dad9a0cf4	محمد الدبيسي الجهني	7/23/23 12:02	المدينة المنورة				en	ae	alrajhi	Indeed, a distinguished bank in everything, it saved us time and effort. Thank you.	ar	indeed distinguish bank everything save us time effort thank	Positive	App Store	1	0	0
App Store	d2834bc0-50d2-491c-aca4-c0139d767dac	نشمية الذكية	7/10/23 17:08	افضل تطبيق ع الاطلاق				en	ae	alrajhi	The best app ever and deserves ten stars.	ar	best app ever deserve ten star	Positive	App Store	0	0	0
App Store	b6be4b38-b137-47d8-87a7-a96f6920eaf5	المها الحارثي	2/13/23 18:13	تطبيق رايع ولكن احيانا يعلق اتمنى تحلون مشكلته				en	ae	alrajhi	The beauty	ar	beauty	Positive	App Store	0	0	0
App Store	7103e226-150b-47c8-a93c-fe8ef2a47209	اسحاق الشعفي	4/27/22 7:30	جازان				en	ae	alrajhi	You saved us a great effort, may Allah reward you with goodness.	ar	save us great effort may allah reward goodness	Positive	App Store	1	0	0
App Store	3ff171db-3825-42e3-9299-bdd3aac511a2	kng 100	5/20/22 19:05	التطبيق السابق افضل				en	ae	alrajhi	The previous application is better.	ar	previous application good	Positive	App Store	1	0	0
App Store	94a9eab6-aa77-4e6f-95ca-c24db8706002	ابواميرهه	4/26/22 19:59	ممتاز				en	ae	alrajhi	Excellent	ar	excellent	Positive	App Store	0	0	0
App Store	b5ba9601-c5ed-4d25-90f5-dcb21077097f	توب التوب التوب	4/23/22 17:06	جوده عاليه				en	ae	alrajhi	There is nothing better than that.	ar	nothing good	Positive	App Store	1	0	0
App Store	7fb7a91d-0dba-4ab4-b23f-df1e34711dae	Wahaam	4/12/22 17:27	شكرا لكم				en	ae	alrajhi	Thank you very much, may Allah reward you. However, the first format is preferable to me.	ar	thank much may allah reward however first format preferable	Positive	App Store	1	0	0
App Store	4a17f880-053d-49ae-ada1-7cf17a5622ca	قريان بن محمد	4/12/22 1:09	بنك الراجحي				en	ae	alrajhi	Al Rajhi is the epitome of luxury.	ar	al rajhi epitome luxury	Positive	App Store	1	0	0
App Store	b350e6f4-6d70-4d76-b4f7-24e93e5cf077	Asmaffghjuhg	3/26/22 22:33	التحديث الجديد رائع				en	ae	alrajhi	The best.	ar	best	Positive	App Store	0	0	0
App Store	da12e622-e080-402a-a49d-3a2e2b74a0f1	m.albl	4/2/22 18:07	Good				en	ae	alrajhi	The best application except for international transfers. I suffer from the issue of adding beneficiaries and being forced to go to the transfer branches every time to add international beneficiaries.	ar	best application except international transfer suffer issue add beneficiaries force go transfer branch every time add international beneficiaries	Negative	App Store	0	1	0
App Store	f9135edf-a4a9-4c3d-83fb-de43ae6d5d69	عادل هستر	3/25/22 21:57	خدمات ولا أروع				en	ae	alrajhi	Excellent program and deserves fifty million stars.	ar	excellent program deserve fifty million star	Positive	App Store	0	0	0
App Store	e665234c-e3c0-42ea-9f13-2b942fd18d48	ابو رانسى	3/21/22 22:47	تحويل دولى				en	ae	alrajhi	Why is international transfer not working?	ar	international transfer work	Negative	App Store	0	1	0
App Store	87629304-4c2c-48c9-8df3-adf5fc3daa95	Bu Mohd65	3/11/22 8:38	👍🏻				en	ae	alrajhi	Great services ðð»ðð»	ar	great service	Positive	App Store	0	0	0
App Store	2c61ddeb-3aaa-401a-815f-192614b5b98e	abu maha 66065	3/10/22 15:04	Thx				en	ae	alrajhi	Thxxxxxxx	en	thxxxxxxx	Positive	App Store	0	0	0
App Store	d3632e2d-a242-4c82-ad01-38461243cb59	ع ي ع س	2/24/22 3:55	تطبيق رائع				en	ae	alrajhi	The application is wonderful and easy to use.	ar	application wonderful easy use	Positive	App Store	0	0	0
App Store	a53e2fce-7327-4f16-a0ce-6afa69b8ec52	كمال الزنفلي	2/20/22 8:29	خميس مشيط				en	ae	alrajhi	Thank you	ar	thank	Positive	App Store	0	0	0
App Store	3efba9ff-129f-4f99-a5ee-7fdbf87648a5	masoud-bj_ic	2/5/22 23:18	Ok				en	ae	alrajhi	Ok	en	ok	Neutral	App Store	0	0	0
App Store	1fa00aab-4358-49f3-8b58-e0366ddaee26	بدر ابوراكان	2/5/22 11:03	شكراً الراجحي				en	ae	alrajhi	Mobile bank in my hands	ar	mobile bank hand	Neutral	App Store	0	0	0
App Store	725fdc17-a412-44b5-a563-7c243afde307	ناغت	2/4/22 17:14	حي الضباط				en	ae	alrajhi	Excellent service, couldn't be better.	ar	excellent service couldnt good	Positive	App Store	1	0	0
App Store	4eca710e-c479-42fd-9875-d11ff182f512	ماجدالظفيري	1/31/22 7:25	اتحديث الجديد كفوا كفوا. كفوا				en	ae	alrajhi	The new update is excellent. It deserves twenty stars.	ar	new update excellent deserve twenty star	Positive	App Store	0	0	0
App Store	e0b5739a-ea63-4bd2-b748-1b601a68e025	almheirian	1/30/22 10:25	خدمة متميزة				en	ae	alrajhi	Thank you for your efforts. Excellent service.	ar	thank efforts excellent service	Positive	App Store	0	0	0
App Store	7972fd4f-82e5-46f1-bded-d35c3de05813	نلزين	1/27/22 13:12	حلو وسهل الاستخدام				en	ae	alrajhi	The best Saudi bank.	ar	best saudi bank	Positive	App Store	0	0	0
App Store	3a287c8e-0a6c-490c-b2d7-e7449b093270	12131333	1/4/22 15:08	الافضل				en	ae	alrajhi	No mistake ðð»	ar	mistake	Neutral	App Store	0	1	0
App Store	bc53b65b-90a2-4ea9-bd69-3db80e2ea5fc	3zooz82247	4/24/22 23:32	تطبيق جميل				en	al	alrajhi	It only needs a few extra details and it becomes perfect ðð»	ar	need extra detail become perfect	Positive	App Store	1	0	0
App Store	eca1d28b-61b3-45d5-b6b0-1e2385c21ed9	أم إبراهيم .	1/21/22 9:25	.				en	ao	alrajhi	More than wonderful.	ar	wonderful	Positive	App Store	0	0	0
App Store	006c35ba-a67f-45df-a97e-27c4e592d164	Altafgaffar	3/28/22 0:01	A great banking app				en	au	alrajhi	The new app is very responsive and easy to use. A real pleasure to Bank with.	en	new app responsive easy use real pleasure bank	Positive	App Store	0	0	0
App Store	82c82eb2-f12f-4c87-94be-0ecdce3d8c42	K.alnahdi	10/9/22 19:04	Privacy matters				en	au	alrajhi	Why force users to share their location in order to access the app? Iâve used many banking apps from different parts of the world, and Iâve never been asked to share my current location	en	force users share location order access app ive use many bank apps different part world ive never ask share current location	Neutral	App Store	0	1	0
App Store	6daa3968-8173-4ea2-a2db-4cc7e0bc6e3b	Fa algarni	2/14/22 3:12	Brilliant app				en	au	alrajhi	This app makes my life easier	en	app make life easy	Positive	App Store	0	0	0
App Store	8f21d528-b2fb-4181-9121-2f6317a55913	Alqurayn	2/16/22 8:24	Advanced services				en	au	alrajhi	Easy and comfortable app.	en	easy comfortable app	Positive	App Store	0	0	0
App Store	0f9ec607-0340-4ff2-8ab2-3165d226d50b	Jools@51	4/27/22 8:02	Excellent				en	au	alrajhi	So easy to use.	en	easy use	Positive	App Store	0	0	0
App Store	0e146191-d6f4-4145-b508-c3d045f263d6	norahmindil	4/27/22 4:49	N				en	au	alrajhi	Great service thank you AlRajhiBank	en	great service thank alrajhibank	Positive	App Store	0	0	0
App Store	833d5756-bda7-4c54-b0e9-66fc8197c89c	alghowairi	6/23/23 10:19	Hi				en	au	alrajhi	I love your bank	en	love bank	Positive	App Store	0	0	0
App Store	fa904c5b-d958-4e9e-9a74-6aeaee2dff0b	Khalid29(	2/2/22 19:35	Greate app				en	au	alrajhi	Greate app	en	greate app	Neutral	App Store	0	0	0
App Store	c2fc93db-2835-4cb3-b5ab-18e01776d8a7	Aiman Alharbi	4/27/22 7:42	بيرفكت 👌🏻				en	au	alrajhi	Thank you Al Rajhi for the beautiful application.	ar	thank al rajhi beautiful application	Positive	App Store	0	0	0
App Store	ba83ec05-dd3d-4815-b515-28fe09e35a2b	mnbhjkl1442	4/27/22 16:20	خصم قيمة القروض				en	au	alrajhi	The deducted amounts for loan repayment do not appear in the account statement.	ar	deduct amount loan repayment appear account statement	Neutral	App Store	0	1	0
App Store	c732dfcf-8d9b-42b8-8999-b432528d42bb	khalidvip987	4/17/22 3:33	تطبيق الراجحي				en	au	alrajhi	With complete honesty, safe and comfortable internally and internationally.	ar	complete honesty safe comfortable internally internationally	Positive	App Store	0	0	0
App Store	78e0208d-c564-4e35-8245-3744d52f6183	F. Alshahrani	2/26/22 16:51	تطبيق ممتاز 👍🏻				en	au	alrajhi	An exceptional and continuously evolving application from Al Rajhi Bank.	ar	exceptional continuously evolve application al rajhi bank	Positive	App Store	1	0	0
App Store	7ecd4b77-c8ea-4fae-a259-ee08073e2f10	fnfayr	2/15/22 16:47	تقييمي لجودة برنامج الراجحي				en	au	alrajhi	Excellent and very easy.	ar	excellent easy	Positive	App Store	0	0	0
App Store	9ebf13a1-6af7-46cc-8c17-7ac3122908a1	omar0656	1/15/22 10:48	تطبيق رائع جداً				en	au	alrajhi	"An easy and smooth application that Al Rajhi Bank is thankful for."	ar	easy smooth application al rajhi bank thankful	Positive	App Store	0	0	0
App Store	ec3979bc-9ea8-4c66-a7ea-632d8d244c6f	Abha988226	1/21/22 5:46	جيد جدا				en	au	alrajhi	Very good.	ar	good	Positive	App Store	0	0	0
App Store	89236239-943b-41d4-ad71-45760db9995e	sharisho	4/14/22 19:13	Fabulous				en	au	alrajhi	Fabulous	en	fabulous	Positive	App Store	0	0	0
App Store	b4994ace-2a05-4461-9332-a6c88e8e18ce	fvvbjuytf	1/18/22 5:30	علي				en	az	alrajhi	The best bank in the world.	ar	best bank world	Positive	App Store	0	0	0
App Store	c384711e-dd33-41bf-bf05-aed4fc4a9707	Rmusajjin	3/19/22 10:24	Best bank ever				en	bh	alrajhi	The experience is just perfect !	en	experience perfect	Positive	App Store	0	0	0
App Store	305fde2c-a165-41fc-b84b-07a301735216	Abdulla Al Mannaei	3/20/22 17:51	Abdulla Mannaei				en	bh	alrajhi	Very User Friendly Online Banking. Save time & efforts.	ar	user friendly online bank save time efforts	Positive	App Store	0	0	0
App Store	957cab89-fe5c-4d4e-935e-0f1186b5b3e1	القلاليف	11/23/22 8:58	مشكله سحب				en	bh	alrajhi	Problem of withdrawing the maximum amount of 5000 riyals, please adjust the withdrawal amounts higher. And if I want to transfer an amount, I want to link my Bahraini account to the code. Thank you.	ar	problem withdraw maximum amount riyals please adjust withdrawal amount high want transfer amount want link bahraini account code thank	Neutral	App Store	0	1	0
App Store	16aeeaae-5b3c-4631-8f20-8ac77debc9ff	O.althawadi	4/13/22 15:50	يعجبني استخدامة				en	bh	alrajhi	One of the best and user-friendly banking apps.	ar	one best userfriendly bank apps	Positive	App Store	0	0	0
App Store	2f182e9c-fe98-40f3-ae43-9829cbcc82db	Holhol the firest	3/31/22 11:12	الراجحي				en	bh	alrajhi	The application is excellent.	ar	application excellent	Positive	App Store	0	0	0
App Store	3d71937e-b9cf-440f-9cd5-27bc3c61a44e	asdotaibi	4/12/22 19:43	الرياض				en	bh	alrajhi	Easy and simple application.	ar	easy simple application	Positive	App Store	0	0	0
App Store	5c464907-1337-43a4-b419-75a8963bc957	samir aldehim	10/20/22 20:26	Great service				en	ca	alrajhi	Great service	en	great service	Positive	App Store	0	0	0
App Store	55d23a2d-78a7-4a4f-81f7-9a81f8f9f5f8	abraboylambo	7/8/23 0:04	Customer service				en	ca	alrajhi	You have the worst customer service all over the kingdom of Saudi Arabia	en	bad customer service kingdom saudi arabia	Negative	App Store	1	0	0
App Store	7d00723c-bce5-49ad-bea1-71c3a8256690	saeed alamri	3/31/23 8:45	التحديث جدا سيئ				en	ca	alrajhi	It has become bad and complicated, and there is no need for development to improve it. Instead, the opposite happened. We hope there is an option available to revert back to the old application or continue with the new one.	ar	become bad complicate need development improve instead opposite happen hope option available revert back old application continue new one	Negative	App Store	1	0	0
App Store	f173a50d-2e7e-4bb7-b597-0ea882fc9f29	abu tiger	5/13/22 15:36	Alharbi				en	ca	alrajhi	Perfect	en	perfect	Positive	App Store	0	0	0
App Store	e7c2c38f-94ec-4af8-93d9-97057f896cfe	Sami7n	5/2/22 7:22	تطبيق ممتاز وسلس				en	ca	alrajhi	I hope that during the maintenance of the application, there will be a notification and an approximate time for its completion.	ar	hope maintenance application notification approximate time completion	Neutral	App Store	0	1	0
App Store	062ebb69-5678-4ed6-8b50-d32b1d45880d	Nail elden	4/30/22 13:23	Easy and efficient				en	ca	alrajhi	Thank you very much for such an amazing application itâs very easy and efficient perform online banking	en	thank much amaze application easy efficient perform online bank	Positive	App Store	0	0	0
App Store	e0504af4-f27e-4c67-9618-8953db61e160	Mohammad Aljameel	4/26/22 18:18	This is for the UX team at AlRajhi				en	ca	alrajhi	I love your job on the app and I admire your talent as well, but I hate the fact that each time I make a transfer, you forcefully redirect me to âWrite a Reviewâ page. I donât have a problem answering yes or no, but I donât want to give a review each time I transfer. I hope you take this into consideration	en	love job app admire talent well hate fact time make transfer forcefully redirect write review page dont problem answer yes dont want give review time transfer hope take consideration	Positive	App Store	1	0	1
App Store	6ec11bae-26ec-449f-9254-bdd05d037793	ووار	4/26/22 12:19	رااااائع جدا جدا. وشكرا لكم على هذا البرنامج				en	ca	alrajhi	Beautiful	ar	beautiful	Positive	App Store	0	0	0
App Store	5a1bb003-9a30-4c28-a3b6-ae5866588ae1	Johns s	4/26/22 2:22	Nice				en	ca	alrajhi	Very nice	en	nice	Positive	App Store	0	0	0
App Store	7590527c-6da9-4d9b-abaf-716e0e6bcce2	Sggashsjsjzzbbzbz	4/25/22 6:58	Caterannada				en	ca	alrajhi	An easy and professional app	en	easy professional app	Positive	App Store	0	0	0
App Store	2637465d-5315-4c9b-8732-8ba643f3c104	nory 123456	4/21/22 16:22	👍🏽good				en	ca	alrajhi	Goooood	hi	goooood	Positive	App Store	0	0	0
App Store	ab5f65ed-ce5d-4c17-8a0c-c84fa994c964	shahbaz memon	4/18/22 11:45	Shahbazmemon				en	ca	alrajhi	Shahbazmemon1	hr	shahbazmemon	Neutral	App Store	1	0	0
App Store	501e1c30-4136-4bf7-a1a0-096ccf151204	EisaAlmalki	4/16/22 14:19	Great app				en	ca	alrajhi	Great app	en	great app	Positive	App Store	0	0	0
App Store	a9556f6b-4ab4-4611-ab67-65cfbb333ea8	فيصل المسعود	4/16/22 3:00	جميل				en	ca	alrajhi	Beautiful app, but it would be great if it had quick access through Face ID. Also, I'm facing issues adding a beneficiary in another bank. Thank you.	ar	beautiful app would great quick access face id also im face issue add beneficiary another bank thank	Positive	App Store	0	1	0
App Store	9eac7201-2207-44f4-822a-b6e028b7a4f1	Newline75	4/7/22 23:40	Excellent app				en	ca	alrajhi	Excellent app	hi	excellent app	Positive	App Store	0	0	0
App Store	bf59c103-2b71-41e8-86bd-9aa4e0500934	المعانده	3/25/22 15:51	تجربه ممتازه وسهله				en	ca	alrajhi	Excellent experience and an easy, uncomplicated programð	ar	excellent experience easy uncomplicated program	Positive	App Store	1	0	0
App Store	7a1ccd56-cfc7-417a-9561-c9a7c69bfbbb	خالد١٢٣٤٥٦٧٨٩	3/18/22 17:18	Best app				en	ca	alrajhi	Best app	en	best app	Positive	App Store	0	0	0
App Store	c8af4f2d-6c2f-4b8e-9757-bb2cdf17e966	هيفاء ٤٤	3/14/22 21:48	شكرًا الراجحي				en	ca	alrajhi	"Very amazing program."	ar	amaze program	Positive	App Store	0	0	0
App Store	1d0d6dcc-a79a-45d0-bf2d-4133d4d80264	Rubaaziz	3/12/22 22:41	تطبيق رائع بمعنى الكلمة				en	ca	alrajhi	Easy to use and includes most services.	ar	easy use include service	Positive	App Store	0	0	0
App Store	9863e92f-eb9f-4b38-8a85-0f6a958bfc18	Zaid0087	3/12/22 21:40	حائل- السعودية				en	ca	alrajhi	Easy and advanced. Thank you.	ar	easy advance thank	Positive	App Store	0	0	0
App Store	cb0fddbe-24f3-4682-9cc9-dd27847d8530	Al shareef	3/9/22 11:28	بنك متطور				en	ca	alrajhi	One of the best banks ðð» forward.	ar	one best bank forward	Positive	App Store	0	0	0
App Store	0a0a87db-b073-4903-adbf-84048fc63e7e	Asaso24	2/10/22 18:31	عملي جداً				en	ca	alrajhi	A very practical application that covers all your banking needs.	ar	practical application cover bank need	Positive	App Store	1	0	0
App Store	2b98f56d-6d04-46c3-b963-0c669f0027ab	taefeetwasher704	1/26/22 16:09	good interface				en	ca	alrajhi	love the new update very easy to transfer between accounts and/or charities english translations accurate as well ðð	en	love new update easy transfer account andor charities english translations accurate well	Positive	App Store	0	0	0
App Store	6b779da9-2774-44b5-ac31-b8c05919894a	Hredwan	1/15/22 12:42	تطبيق رائع				en	ca	alrajhi	Advanced and excellent services that surpass other banks.	ar	advance excellent service surpass bank	Positive	App Store	0	0	0
App Store	0cafeb2f-7370-441f-88f7-a8640f16f7e2	أنس الزايد	1/10/22 9:27	ممتاز				en	ca	alrajhi	Excellent and easy.	ar	excellent easy	Positive	App Store	0	0	0
App Store	510ca4e7-129d-425e-89eb-2995feaebcbd	فهد بلج	1/8/22 9:18	القرارة				en	ca	alrajhi	Al-Qararah Al-Dawadmi Intermediate School	ar	alqararah aldawadmi intermediate school	Neutral	App Store	0	0	0
App Store	3d84421e-9eae-4a3f-9868-11f4684b5100	T.Ibra1410	1/8/22 8:46	There is a technical issue in the application				en	ca	alrajhi	I distinguish the best banking application in Saudi Arabia without a doubt. Thank you Al-Rajhi for your development and for listening to your customers' opinions and taking them seriously. A few years ago, I recommended connecting transfers to mobile numbers, and it didn't take long for you to implement it. Thank you for your management and progress.	ar	distinguish best bank application saudi arabia without doubt thank alrajhi development listen customers opinions take seriously years ago recommend connect transfer mobile number didnt take long implement thank management progress	Positive	App Store	1	0	0
App Store	e7df4b9a-11d4-4065-beaf-219f078d1ac5	عبدالعزيز عبداقرحمن	5/15/22 9:52	تقييم تطبيق الراجحي				en	ca	alrajhi	I cannot say enough thank you for the banking services you provide online and through the application with technology, simplicity, and quality. It is easy to navigate through the service options. Thank you to all those responsible for the Rajhi application, thank you to all the employees of Rajhi Bank services, thank you to Rajhi Bank, the customer. Abdulaziz bin Abdulrahman Al Mutairi 0558980003…	ar	say enough thank bank service provide online application technology simplicity quality easy navigate service options thank responsible rajhi application thank employees rajhi bank service thank rajhi bank customer abdulaziz bin abdulrahman al mutairi riyadh	Positive	App Store	0	0	0
App Store	47adb847-8538-4b3b-ac19-ec4fd504bc8a	Dr.eng	4/30/22 4:12	Dr				en	cz	alrajhi	Very good and intelligent app Thank you Alrajhi	en	good intelligent app thank alrajhi	Positive	App Store	0	0	0
App Store	d99507e7-649f-4f62-b250-b1c683836eb1	Sauoss	7/14/23 12:12	Very simple therefore top				en	de	alrajhi	The app is excellent because of its simplicity and lack of complexity. It is easy to use for everyone and does not require much research. Please keep its simple feature and do not pay attention to the opinions of experts. Let the simplest people decide. I congratulate you on the ease of the program.	ar	app excellent simplicity lack complexity easy use everyone require much research please keep simple feature pay attention opinions experts let simple people decide congratulate ease program	Positive	App Store	1	0	0
App Store	d51aad59-3ef8-4452-a590-0838a42690fe	Adnan daud	9/12/23 8:20	Beste Service				en	de	alrajhi	Beste Service	de	beste service	Positive	App Store	0	0	0
App Store	310043f7-a8da-4309-a320-7819bcdf0424	missnajlaa	4/18/22 22:28	Good job				en	de	alrajhi	Proud of you â¤ï¸â¤ï¸ð	ar	proud	Positive	App Store	0	0	0
App Store	b84c296e-adc6-4b19-9ad9-767b8dbb8a28	BLM/PLM	8/31/23 6:57	Recommend				en	eg	alrajhi	It is a wide good app, but please make the hide balance option, when showing the account QR, thank you	en	wide good app please make hide balance option show account qr thank	Positive	App Store	1	1	0
App Store	db41cd76-a64c-4466-9a6e-e52899018d3d	Nuanex	9/4/23 13:15	Crashes on ios?				en	eg	alrajhi	The app was perfect and running really smooth, I need to make a transaction now and the app itself requested updating, it crashes now EVERY SONGLE time I log in! I tried deleting and re-uploading, still crashes! please fix this glitch so I can continue using your app and services	en	app perfect run really smooth need make transaction app request update crash every songle time log try delete reuploading still crash please fix glitch continue use app service	Negative	App Store	1	0	0
App Store	de2487b9-40ab-4090-8715-5d60ffb949c1	mhmdelbasmy	4/27/22 15:43	Perfect				en	eg	alrajhi	As a software engineer, I can truly know how much effort you spent to make such an incredible app. Thank you for making our life easier	en	software engineer truly know much effort spend make incredible app thank make life easy	Positive	App Store	0	0	0
App Store	c1e51c96-5d17-4344-9dce-24950b592835	Khaled Elshazly	3/14/22 6:00	Excellent Application				en	eg	alrajhi	Easy to use and has all required features to manage your finance.	en	easy use require feature manage finance	Positive	App Store	1	0	0
App Store	3a52efe4-dd59-4b56-b10c-4d93d0041498	Zorooooz	3/27/22 17:01	Mobile App				en	eg	alrajhi	Amazing experience with very easy and friendly mobile appâ¦	en	amaze experience easy friendly mobile app	Positive	App Store	0	0	0
App Store	8a26da49-6bd6-4d57-87af-3a17d9136fa7	Ehab Abdalla Ibrahim	4/3/22 11:56	Great app				en	eg	alrajhi	The app is getting updated regularly and itâs very easy to use.	en	app get update regularly easy use	Positive	App Store	0	0	0
App Store	fd350642-b95d-4db2-8212-bc7a29de2690	victim of the camera	2/3/22 13:42	Easy and fast				en	eg	alrajhi	It is one for all application	en	one application	Neutral	App Store	1	0	0
App Store	ced8004c-1525-4b6a-90c1-cdeb13bb7365	Islam ELDamaty	6/15/23 10:55	Transfer limit				en	eg	alrajhi	Need to extend transfer limit	en	need extend transfer limit	Neutral	App Store	1	0	0
App Store	24b83c8d-fdc3-4071-895c-1ae4bc395ec8	ehabaamm	1/30/22 12:56	Very good				en	eg	alrajhi	Easy and quick	en	easy quick	Positive	App Store	0	0	0
App Store	28689e99-d7f4-4b78-9dd8-f6ac84c65d90	Mahmoudismailabbas	9/1/23 12:04	Crashing for 5 days				en	eg	alrajhi	Since I downloaded the app and created an account it keeps crashing and stops no matter how many times I offload the app and reinstall it again.	en	since download app create account keep crash stop matter many time offload app reinstall	Negative	App Store	0	1	0
App Store	994de916-b255-4169-ad35-56b117d70900	Z2reda	2/20/22 21:55	Nice and simple				en	eg	alrajhi	Nice and simple to do transfer from	en	nice simple transfer	Positive	App Store	0	0	0
App Store	e8b5e7f5-d41f-4d11-b7b3-e58987ca9447	Ahmed abo Hams	4/18/22 19:53	Thank you				en	eg	alrajhi	Very good experience	en	good experience	Positive	App Store	0	0	0
App Store	eb5cf3ad-af77-43c4-ad79-26d61899b061	all dying v	2/18/22 17:36	Very good				en	eg	alrajhi	Make all actions easy , thanks	en	make action easy thank	Positive	App Store	0	0	0
App Store	699c5bff-75d5-4829-8f83-87808674712d	Mero246	4/28/22 9:11	Very good application				en	eg	alrajhi	Very good application	en	good application	Positive	App Store	0	0	0
App Store	cff29527-e821-44d7-a47a-347118a050b0	mohamd fodah	4/24/22 16:48	Doctor				en	eg	alrajhi	Very nice bank	en	nice bank	Positive	App Store	0	0	0
App Store	b2a319e7-dae6-4475-8197-1d5e23e4376d	Wyavahs	2/19/22 18:59	Bad				en	eg	alrajhi	Very bad i keep trying many times just to long in and eveytime when I login suddenly the application is closed	en	bad keep try many time long eveytime login suddenly application close	Negative	App Store	1	1	0
App Store	5a5c3f9a-96d4-4c86-ac8f-19b79889e361	Wdgurgar	4/28/22 23:10	wdgurgar				en	eg	alrajhi	Satisfied service	en	satisfy service	Positive	App Store	1	0	0
App Store	89a11809-24e6-4cc4-ac16-32f5759b848d	Abolsheen	9/1/23 6:53	Please fix				en	eg	alrajhi	Not working after last update	en	work last update	Negative	App Store	0	1	0
App Store	d8b27353-b2e8-4068-80cc-69892ba1fe6b	sakaref2	4/20/22 20:19	Amazing app				en	eg	alrajhi	Very good banking app now	en	good bank app	Positive	App Store	0	0	0
App Store	dc930747-07eb-46f4-b67a-0cdbf1c74b09	eslam kampash	1/27/22 11:35	Great .				en	eg	alrajhi	Amazing app and very easy	en	amaze app easy	Positive	App Store	0	0	0
App Store	53035601-2a9d-4a3c-bd5e-e71787320e42	Silent-x-scream	9/6/23 14:37	Evaluation				en	eg	alrajhi	Excellent in every thing ðððððð	en	excellent every thing	Positive	App Store	0	0	0
App Store	230a7a64-fb31-4eb5-9494-520351eea4b1	Mhmmd Hassan	4/14/22 7:44	Very good				en	eg	alrajhi	Very good app Great experience	en	good app great experience	Positive	App Store	0	0	0
App Store	5b7e93b2-af56-4184-a1f6-e19847cfe27b	mahmoud m gmal	8/27/23 20:02	ism happens				en	eg	alrajhi	every thing is beautiful	en	every thing beautiful	Positive	App Store	1	0	0
App Store	3ae39aec-6be3-4556-9afe-b62f2cd01c47	elmansoury920	3/13/22 14:54	Elmansoury920				en	eg	alrajhi	Nice banking services	en	nice bank service	Positive	App Store	0	0	0
App Store	8ca1d164-f57d-459b-bf73-4b5a87b4bfcb	Hiahmad	7/7/23 6:31	Very good				en	eg	alrajhi	Very good app	en	good app	Positive	App Store	0	0	0
App Store	36e7bfb3-8c9e-41e4-8a86-c6d31ae4a0e4	د حسام	4/24/22 8:31	Thanks				en	eg	alrajhi	Thanks	en	thank	Positive	App Store	0	0	0
App Store	cf39f2d0-204e-4962-ba65-25e018561186	ahmedosama1493	4/28/22 10:02	Nice app				en	eg	alrajhi	Very nice app	en	nice app	Positive	App Store	0	0	0
App Store	2bdee38f-8a91-47fe-a79a-b2d64e30610e	coach abdoo	1/20/22 6:04	Goood				en	eg	alrajhi	Very god	en	god	Positive	App Store	0	0	0
App Store	ace49265-a13d-4272-b01d-c3d68103fa48	Adly ismail	5/25/22 17:38	&&&&&				en	eg	alrajhi	Good job	en	good job	Positive	App Store	0	0	0
App Store	5ab5cb1c-ebe9-4b63-9ac9-6915d3541c32	ahmed mea	4/1/22 15:31	good				en	eg	alrajhi	ahmed	en	ahmed	Neutral	App Store	0	0	0
App Store	df57a874-fb7f-4819-b2e0-ba44427fc21f	Tamim timo	1/22/22 19:40	Timo				en	eg	alrajhi	Tamim timo does not have a clear meaning in Arabic. It appears to be a proper name or a slang expression that may require more context to accurately translate.	ar	tamim timo clear mean arabic appear proper name slang expression may require context accurately translate	Negative	App Store	1	0	0
App Store	15929e55-8c38-4c6c-9787-1d6ea5c64bc5	دكتور المستشار	8/26/23 6:13	محمد امام				en	eg	alrajhi	Excellent and very fast banking in application and execution.	ar	excellent fast bank application execution	Positive	App Store	0	0	0
App Store	3acdd91a-909d-4ebb-9ca2-cf3d290ec4f9	عمر فكري عوض عبدالعزيز	9/4/23 19:00	السعوديه				en	eg	alrajhi	The application is not responding and exits automatically.	ar	application respond exit automatically	Negative	App Store	0	1	0
App Store	10c27e7d-4906-4f8b-b7a0-6df37cef98ed	shaimaa nosshy	9/3/23 11:56	التطبيق بيفتح و يقفل علي طول ومش عارفه اعمل عليه حاجة				en	eg	alrajhi	The application keeps opening and closing immediately, and I don't know what the problem is.	ar	application keep open close immediately dont know problem	Negative	App Store	0	1	0
App Store	7d580010-ec69-4857-9ded-cc84fafafc51	كسروي	7/15/23 12:54	الرياض				en	eg	alrajhi	The application is now easier and faster. God bless you.	ar	application easy fast god bless	Positive	App Store	0	0	0
App Store	ba4b9e7b-240f-4edc-bc16-935484a281dc	ك د م	7/12/23 16:43	افضل بنك				en	eg	alrajhi	Al Rajhi Bank offers unparalleled services that redefine boundaries. Thank you for the excellent banking services provided by Al Rajhi.	ar	al rajhi bank offer unparalleled service redefine boundaries thank excellent bank service provide al rajhi	Positive	App Store	1	0	0
App Store	707657d3-a5b1-48e2-9bde-4170660f6e8d	m zeyada	6/22/23 6:25	وقت اللياقه حي الملك سلمان				en	eg	alrajhi	Riyadh	ar	riyadh	Neutral	App Store	0	0	0
App Store	9377dfb2-ccd8-4efb-b07c-d235fbe69df4	Rami Gabri	5/25/23 13:19	اهم شي لاتروح الفرع				en	eg	alrajhi	Al Rajhi is an excellent application. It saves you the hassle of visiting a branch. The truth is, visiting a branch is terrible because the staff's attitude is inappropriate and arrogant. I swear, if you don't go to the branch personally, they won't treat you well.	ar	al rajhi excellent application save hassle visit branch truth visit branch terrible staff attitude inappropriate arrogant swear dont go branch personally wont treat well	Negative	App Store	1	0	0
App Store	4f47b399-7f4c-4da8-873c-3b7472296d21	abdulmonem alshayeb	10/7/22 9:59	مشكلة				en	eg	alrajhi	When I opened the app today, I received a message saying "There is a new version and a word update". I actually updated it, and when I opened it again, the same message appeared (there is a new version and a word update). When I click on the word update, it takes me to the Apple Store and there is a word "Open" and there is no other update. This keeps happening until now, and the app does not ope…	ar	open app today receive message say new version word update actually update open message appear new version word update click word update take apple store word open update keep happen app open	Neutral	App Store	0	1	0
App Store	faadd3c0-a23f-41d3-aac7-5e832bf6a4ea	a hi Lou a ‎WA as b	5/13/22 11:37	احسن بنك				en	eg	alrajhi	"Seriously"	ar	seriously	Neutral	App Store	1	0	0
App Store	87701508-51fd-4d8d-bf66-ea7318fd5185	dr hany Fouad	5/11/22 3:59	ممتاز				en	eg	alrajhi	"Now it's better."	ar	good	Positive	App Store	0	0	0
App Store	60b72008-b2ec-4568-9cae-41a092cde327	Essamelbosaty	5/9/22 13:13	برنامج مميز				en	eg	alrajhi	Special program	ar	special program	Neutral	App Store	0	1	0
App Store	45d0e7ba-6d61-4e00-b303-6e6eb56e1197	ahmed hooba	5/6/22 14:18	سهولة الاجراءات				en	eg	alrajhi	Masha Allah, it is extremely easy to navigate through the procedures using the application.	ar	masha allah extremely easy navigate procedures use application	Positive	App Store	0	0	0
App Store	4e20cc48-dd38-41d2-84f1-e4c650064833	شريف الحويحي	5/3/22 23:37	رائع				en	eg	alrajhi	Easy to use	ar	easy use	Positive	App Store	0	0	0
App Store	4791fb52-0cbd-4089-a156-c7053616cde6	a.zaki	5/3/22 14:31	Auszeichnung				en	eg	alrajhi	Sehr gut Service	de	sehr gut service	Neutral	App Store	0	1	0
App Store	b94c88f5-a3e0-42f5-a131-c53727dce3be	كويس جداااا	5/2/22 13:49	ممتاز				en	eg	alrajhi	Excellent very very very much	ar	excellent much	Positive	App Store	0	0	0
App Store	8c0213d7-6206-43a5-a52d-d577813f56f3	fairedu5	4/30/22 9:09	ممتاز				en	eg	alrajhi	Speed in service and ease, may Allah bless you.	ar	speed service ease may allah bless	Positive	App Store	0	0	0
App Store	ab3a5bb7-70e7-4ad8-958c-6cd1999af866	Bahaa Mohamed	4/27/22 5:45	ممتاز				en	eg	alrajhi	Excellent service	ar	excellent service	Positive	App Store	0	0	0
App Store	80ebce0b-615f-4715-96bf-e7f8dae8549b	kappa516	4/27/22 5:33	Excellent				en	eg	alrajhi	Easy,accible save	en	easyaccible save	Neutral	App Store	0	0	0
App Store	9b1a90d1-6125-4775-8798-00be0defdcc9	محمود بيجا	4/25/22 17:44	ممتاز جدا				en	eg	alrajhi	Distinctive	ar	distinctive	Neutral	App Store	1	0	0
App Store	d856a658-5723-492e-9474-518c87532f26	Epmengmothman	4/21/22 18:38	Simble				en	eg	alrajhi	Simble	en	simble	Neutral	App Store	0	0	0
App Store	ff4e2192-7c9b-46c9-ae79-a4e22dd5a9e5	AHMED KADEN	4/20/22 15:16	دايم في تقدم خدمه ممتازه				en	eg	alrajhi	Always providing excellent service.	ar	always provide excellent service	Positive	App Store	0	0	0
App Store	96f6b128-b29f-475d-82fb-f310e8be3f58	eng.eslamnegm	4/19/22 18:22	Engr. Eslam				en	eg	alrajhi	Above excellent and outstanding	ar	excellent outstanding	Positive	App Store	0	0	0
App Store	b466a695-a865-4b48-bc87-b8752f573d54	medhat oraby	4/19/22 11:46	خدمه ممتازه				en	eg	alrajhi	Excellent service, I swear to God. May Allah reward you for facilitating things for us.	ar	excellent service swear god may allah reward facilitate things us	Positive	App Store	1	0	0
App Store	44e31ee1-713a-46d1-94c3-29e7b725a768	mohamed almasre	4/15/22 20:09	تم				en	eg	alrajhi	It is done/has been done.	ar	donehas do	Neutral	App Store	0	0	0
App Store	125fbda7-8d48-414a-87d2-85205ff3e750	الباشا حمودي	4/13/22 0:05	ممتاز				en	eg	alrajhi	Excellent/Very good	ar	excellentvery good	Positive	App Store	0	0	0
App Store	dbc39fdf-ca43-4197-883b-d71ab06d7731	bedo 2020	4/8/22 15:50	اهلين				en	eg	alrajhi	Excellent, thank you.	ar	excellent thank	Positive	App Store	0	0	0
App Store	c7889053-76f7-429d-a123-d561043c5598	محمود شت	4/12/22 3:01	التطبيق لا يعمل على جوالي				en	eg	alrajhi	The Al-Rajhi application no longer opens on my mobile phone. It used to work perfectly before. The same account is currently working on other mobile phones and works fine for online transactions. I urgently need a solution to this problem.	ar	alrajhi application long open mobile phone use work perfectly account currently work mobile phone work fine online transactions urgently need solution problem	Negative	App Store	0	1	0
App Store	1d268031-0de1-47b0-8bdc-4977919ac4a6	Mahmoud Alshamy	4/3/22 20:04	يستاهل				en	eg	alrajhi	Five stars deservedly	ar	five star deservedly	Positive	App Store	0	0	0
App Store	03522fc2-ff6f-4924-9ca6-68b2bf047ac0	فطوم مباركي	4/8/22 3:46	اسوء بنك تعاملت معه دايم معلق				en	eg	alrajhi	You raise the blood pressure.	ar	raise blood pressure	Negative	App Store	1	0	0
App Store	698d3f23-3a3b-4541-816a-0d02c1c39a04	sayed lela	4/6/22 12:06	سيء جدا				en	eg	alrajhi	The application is good, but the bank branches in Al-Khobar have become extremely bad. The employees are rude, and most of the deposit machines in Al-Khobar do not work.	ar	application good bank branch alkhobar become extremely bad employees rude deposit machine alkhobar work	Negative	App Store	1	0	0
App Store	0253730b-1a7f-4e6a-840b-5ac969130f1e	emyemamtreyu	3/27/22 5:45	انصح بإستخدامه				en	eg	alrajhi	An extremely wonderful application.	ar	extremely wonderful application	Positive	App Store	0	0	0
App Store	ad54f07b-381a-4bba-8f82-43fde02e755e	Dr/DM	3/23/22 19:23	مع خالص الشكر				en	eg	alrajhi	Wonderful, comfortable, and fast experience.	ar	wonderful comfortable fast experience	Positive	App Store	0	0	0
App Store	fbb4b149-f6ce-48b4-b96c-b99638cfdedd	yaser15668	3/14/22 12:53	دائما خدمات ممتازة				en	eg	alrajhi	Excellent. Always excellent services	ar	excellent always excellent service	Positive	App Store	0	0	0
App Store	dacab3cf-118e-4a20-b849-1057540b4db6	usama elsherbini	2/15/22 20:49	شكرا				en	eg	alrajhi	Fast and excellent service, thank you very much.	ar	fast excellent service thank much	Positive	App Store	0	0	0
App Store	7e53325c-b1a9-4921-a34d-da48c0159684	elstoohy	2/22/22 18:29	التحويل الدولي مش شغال				en	eg	alrajhi	He is not willing to convert internationally and always tells me that he is unable to provide this service at the moment.	ar	will convert internationally always tell unable provide service moment	Negative	App Store	0	1	0
App Store	91f24311-b405-4bf1-9588-ba53b5dd54c2	البدرى	2/7/22 19:10	ماشاء الله تبارك الرحمن				en	eg	alrajhi	Good luck!	ar	good luck	Positive	App Store	0	0	0
App Store	c0b99cbb-e447-4426-9d16-3b76b167a0d8	Hisham222	1/27/22 8:33	تحديث جيد				en	eg	alrajhi	Good update and more flexibility. Thank you.	ar	good update flexibility thank	Positive	App Store	0	0	0
App Store	2a946f8e-a85b-4856-af5a-9a35337714b2	ابو حسام المصري	1/23/22 10:51	رائع				en	eg	alrajhi	Great	ar	great	Positive	App Store	0	0	0
App Store	abdc1f75-1352-4a11-827e-472a6970563f	sabry aa	1/20/22 22:33	الحسينيه				en	eg	alrajhi	I thank you.	ar	thank	Positive	App Store	0	0	0
App Store	64b4e8e3-2783-4d7d-a36e-cf4f08321177	ابو الصحاب	1/22/22 21:22	ممتاز				en	eg	alrajhi	Excellent, honestly.	ar	excellent honestly	Positive	App Store	0	0	0
App Store	ced4db4f-d4ec-4557-a474-bf62cb0efd95	Rafik Ellayeh	1/16/22 20:27	شكرا بنك الراجحي علي الخدمة المميزة				en	eg	alrajhi	The best bank in the Kingdom and the Gulf.	ar	best bank kingdom gulf	Positive	App Store	0	0	0
App Store	cdcfccf6-3176-4745-aab6-b26381c2ec7d	ahmed5688	1/8/22 9:43	احمد نصر				en	eg	alrajhi	Great development and ease of use... Thank you, Al Rajhi Bank.	ar	great development ease use thank al rajhi bank	Positive	App Store	0	0	0
App Store	93de7af2-1b08-4a69-880e-a29b63bacb55	ءءءءءءءكءكءءءكءكءكءكم)	1/2/22 13:44	بنك ممتاز				en	eg	alrajhi	Excellent application, may Allah bless you and you have been and continue to be pioneers.	ar	excellent application may allah bless continue pioneer	Positive	App Store	1	0	0
App Store	c6322f50-3ce3-496e-b1be-ac9a634c4918	shaeed0	7/12/23 14:51	شكرًا جزيلا				en	es	alrajhi	One of the easiest banking applications.	ar	one easy bank applications	Positive	App Store	0	0	0
App Store	435ee439-6755-4ce3-b219-39d200002859	saad zh	4/18/22 11:14	تطبيق رائع				en	es	alrajhi	One of the most beautiful banking applications I have used, it is easy and flexible ððð¼	ar	one beautiful bank applications use easy flexible	Positive	App Store	0	0	0
App Store	7031975c-89e2-4181-8f37-155d70412ab9	muhammad sulman arif	2/19/22 8:07	Good banking experience				en	es	alrajhi	Love AlRajhi Banking good experience more options	en	love alrajhi bank good experience options	Positive	App Store	0	0	0
App Store	8a26e479-9bf1-4a05-9ba8-e014537c31cc	tannedfinn	5/2/22 21:23	Reliable banking!				en	fi	alrajhi	Very satisfied so far.	en	satisfy far	Positive	App Store	0	0	0
App Store	e701d9bf-f62f-4e4c-a05c-be3d2e76a9a2	Reem Tambosi	7/25/23 7:05	Easy App				en	fr	alrajhi	Easy to deal with. Fast process and clear. Iâm happy with all services provided. It made my life easier and reaching my goals possible.	en	easy deal fast process clear im happy service provide make life easy reach goals possible	Positive	App Store	0	0	0
App Store	ddfe0780-bc40-4123-9998-e79023ed3016	ابو فهيد الزير	8/27/23 3:36	خدمة رائعه				en	fr	alrajhi	The best Saudi bank with excellent services, and we hope for future development.	ar	best saudi bank excellent service hope future development	Positive	App Store	0	0	0
App Store	e718319e-8958-4195-8dad-9b9f72e36e4d	Ibraheemsg	4/24/22 21:44	1 star for inconvenience				en	gb	alrajhi	The app keeps asking me about my experience even though I have rated it more than zillionth times. Now I will keep giving it a 1 star review until this bugâs fixed.	en	app keep ask experience even though rat zillionth time keep give star review bug fix	Negative	App Store	1	1	0
App Store	479a7ee4-f753-439d-ab52-7af8308b09fc	::: Haitham :::	9/11/22 15:00	Not recommended! Consider using another bank				en	gb	alrajhi	This app violates the users privacy by accessing the customer's location, otherwise the app will not allow you to log in to your banking account. Also, in the previous update, they violated and continuing violating the privacy of users by tracing the user's location and not allowing the users to use more protective practices in accessing their bank account online by using of virtual private netwo…	en	app violate users privacy access customers location otherwise app allow log bank account also previous update violate continue violate privacy users trace users location allow users use protective practice access bank account online use virtual private network service although call complain right tracetrack customers nothing regard matter however seriously consider freeze bank account move anothe…	Negative	App Store	1	1	1
App Store	172ee33a-a94e-49b0-b115-5f9f96329138	Claireeloise	4/28/22 5:05	Convenient				en	gb	alrajhi	Quick and easy transfer. Thank you!	en	quick easy transfer thank	Positive	App Store	0	0	0
App Store	9aa0ecfe-eb5b-4c3b-8b84-d1186a39c471	monawer	4/24/22 20:50	Improved				en	gb	alrajhi	In every update there is an important.	en	every update important	Neutral	App Store	1	1	0
App Store	9a4c8e93-d5da-4d17-beed-0f659a12bdce	mamirza	1/25/22 9:25	Mobile App				en	gb	alrajhi	Great, easy to use, clear and intuitive - start using it.	en	great easy use clear intuitive start use	Positive	App Store	0	0	0
App Store	10c35364-5988-4059-8631-ea81efe9600d	AMAKH33	2/14/22 11:13	A				en	gb	alrajhi	Fast and easy way to manage the account	en	fast easy way manage account	Neutral	App Store	0	0	0
App Store	79f9701e-ff9c-48e3-9912-73f0c6f8023a	Velvet rose 09	5/11/22 6:16	Manal				en	gb	alrajhi	Clear options and fast transactions	en	clear options fast transactions	Positive	App Store	0	0	0
App Store	0af6eb95-5910-4bb1-a4e3-bc933015eeff	jv jg kg	2/5/22 7:13	Amazing				en	gb	alrajhi	Much better than before!	en	much good	Positive	App Store	0	0	0
App Store	b2691e23-f07a-47ea-8ae7-9a8cc683e006	Amirsadia	6/26/23 23:43	Very very helpful service Al rajhi bank . 5star				en	gb	alrajhi	Thank you so much dear banking system really No 1 service	en	thank much dear bank system really service	Positive	App Store	0	0	0
App Store	6ae84761-95d3-45ce-951d-be5d063541e6	hasan5773	4/14/23 14:22	Login Problem				en	gb	alrajhi	Do problems in login page after clicking login button and whole apps stacked in	en	problems login page click login button whole apps stack	Neutral	App Store	0	1	0
App Store	78cf1df7-121c-4338-a6f7-406583b8bd34	Wael-41	2/14/22 18:11	Great and secure application, well done				en	gb	alrajhi	Great and secure application, well done	en	great secure application well do	Positive	App Store	0	0	0
App Store	ac9ef5ab-2bc8-42bc-bd7d-e4e62dd24921	Ma0556020244	6/21/23 6:58	Very nice				en	gb	alrajhi	Itâs easy to work. Thank you so much.	en	easy work thank much	Positive	App Store	0	0	0
App Store	f751f743-eb0b-443c-ae58-e0110cfd1c12	last evil	12/8/22 11:49	One of the best internet banking fast smart				en	gb	alrajhi	Best internet banking	en	best internet bank	Positive	App Store	0	0	0
App Store	37291e90-8cb9-47a4-b388-e326325b807a	A7mad z	2/15/22 8:47	Ahmed				en	gb	alrajhi	Keep it up guys.. excellent experience with the new app	en	keep guy excellent experience new app	Positive	App Store	0	0	0
App Store	0777023d-d884-4134-a012-3ae65ce9d070	b ghg c ghg v	4/27/22 18:39	Excellent				en	gb	alrajhi	Good ð app especially the express sign in	en	good app especially express sign	Positive	App Store	0	0	0
App Store	85da06b5-0b97-4b97-b4a7-9bd352e22049	2345aby	2/11/22 5:17	Awesome				en	gb	alrajhi	Really easy transaction	en	really easy transaction	Positive	App Store	0	0	0
App Store	cb914512-a901-4d1b-ba46-57b485908a0a	Faisalff6100	2/26/22 14:29	Good bank				en	gb	alrajhi	I like it	en	like	Positive	App Store	0	0	0
App Store	620c4e4a-1586-43bf-bb8f-d06e867f4d9d	amromohammed	1/13/22 18:19	Best application				en	gb	alrajhi	One of the best apps in banking	en	one best apps bank	Positive	App Store	0	0	0
App Store	9ae29437-9571-4b63-a48b-a30fb75c0393	salem alatwi	3/12/22 4:36	Awesome				en	gb	alrajhi	The best bank I have ever dealt with	en	best bank ever deal	Positive	App Store	0	0	0
App Store	0faf2e0b-27ad-4f63-a6b5-435d8c85a578	Saleh Altarifi	2/27/22 8:57	Dr Saleh				en	gb	alrajhi	Nice and quick service	en	nice quick service	Positive	App Store	0	0	0
App Store	4113fe49-af2d-4b01-b458-71f94a9b4066	Oceanographer3	1/9/22 13:59	Brilliant				en	gb	alrajhi	It is a great service	en	great service	Positive	App Store	0	0	0
App Store	7da3b585-d105-441c-96a4-ee9e7f163e56	humble jumbo	11/2/22 11:09	Experience				en	gb	alrajhi	Was charged 5 SAR for local transfer?? Should not b the case	en	charge sar local transfer b case	Negative	App Store	0	1	0
App Store	1a2666fc-c827-40b8-890b-c68c6b91d4a5	ASAADASAAD	3/29/23 19:48	تطبيق الراجحي				en	gb	alrajhi	The new application is not easy to use The previous one was very easy	en	new application easy use previous one easy	Negative	App Store	1	0	0
App Store	4e3b2bfd-fffd-4ea7-a10d-85a9c14030f7	Ibra77889900	12/2/22 9:32	Reduce the updates				en	gb	alrajhi	Stop updating for no necessary reason	en	stop update necessary reason	Negative	App Store	0	1	0
App Store	93d47173-ed37-4164-9365-8e4db0961b3d	adhhfx	4/15/22 20:57	Good one				en	gb	alrajhi	Love it. So easy.	en	love easy	Positive	App Store	0	0	0
App Store	fdf9e95d-142d-4ca5-88c9-8c929c4bd090	Faris ALOtaibi Uk	7/26/23 21:43	The best app				en	gb	alrajhi	The best bank app	en	best bank app	Positive	App Store	0	0	0
App Store	45e38814-2704-4667-a6ea-ff606ae7f874	اغفلاع	2/15/22 18:11	Fast and secure				en	gb	alrajhi	Fast and secure	und	fast secure	Positive	App Store	0	0	0
App Store	daaf483b-64d6-4c83-8e09-9f9d221e09a7	Wael Faqihi	1/30/22 23:53	Rubbish Service				en	gb	alrajhi	Rubbish Online costumers service just wasting time	en	rubbish online costumers service waste time	Negative	App Store	0	0	1
App Store	c259c55c-7d97-41fd-bde3-280f33fb7e6a	ColorsDiary	3/22/22 19:56	Stop begging				en	gb	alrajhi	Stop forcing me to give a review every week	en	stop force give review every week	Negative	App Store	0	0	0
App Store	cd7158d2-9965-4dfe-8e85-0b4f26cb27f6	Hamed2013	2/21/22 8:46	Good app				en	gb	alrajhi	It is very good	en	good	Positive	App Store	0	0	0
App Store	a138de7a-3e14-4f69-830a-4c2abe16d6ef	Crown Ars	3/31/22 18:01	Good work				en	gb	alrajhi	Keep going Iâm so happy with Rajihi bank	en	keep go im happy rajihi bank	Positive	App Store	0	0	0
App Store	453140ce-5a54-4167-ae37-333530d3b05e	معاذ الهمزاني	7/25/23 1:52	التطبيق جميل جداً				en	gb	alrajhi	Peace be upon you and the mercy of Allah. The application is excellent and has become much smoother. I wish you success and continued improvement.	ar	peace upon mercy allah application excellent become much smooth wish success continue improvement	Positive	App Store	1	0	0
App Store	e6b279ae-9d16-4ca6-bf50-f7f31c151f93	AlSaawi	7/11/23 18:59	مصرفي المفضل والموثوق لأكثر من 35 سنة				en	gb	alrajhi	My favorite and trusted bank for over 35 years	und	favorite trust bank years	Positive	App Store	0	0	0
App Store	5d09b53d-c2e2-413e-8f12-082bac5c246d	Qurashi1988	2/27/23 16:08	ألوان يوم التأسيس ( أكثر الألوان ملائمة للتطبيق )				en	gb	alrajhi	I find the currently available colors of the foundation day very suitable for the application and comfortable for reading. Honestly, I loved using the application ð¥°.	ar	find currently available color foundation day suitable application comfortable read honestly love use application	Positive	App Store	1	0	0
App Store	31d5ffa6-6b28-4ad2-b57e-66d663c9fb88	Alhaidery Mohammed	10/14/22 7:50	تطبيق الراجحي				en	gb	alrajhi	Al Rajhi application is one of the easiest banking applications.	ar	al rajhi application one easy bank applications	Positive	App Store	0	0	0
App Store	633edd7d-c663-4ae6-b930-106d89fc6fb2	HMA اتش م ايه	6/5/22 8:13	Be Bاحلي بنك				en	gb	alrajhi	One of the most beautiful banks, thank you.	ar	one beautiful bank thank	Positive	App Store	0	0	0
App Store	ebf4b6c1-f18c-4d20-8a72-a29717934435	nogalovely	9/10/22 19:58	صعوبة التحويل				en	gb	alrajhi	Performing the transfer process after multiple attempts. Every time the response is not possible. Try again later. Despite having sufficient balance.	ar	perform transfer process multiple attempt every time response possible try late despite sufficient balance	Negative	App Store	0	1	0
App Store	d8bccbbd-d2dc-47e7-9aac-9c153f46f9c8	Lion-U	7/15/22 3:43	اسواء تطبيق				en	gb	alrajhi	A bad application that works for a day and breaks down for a month.	ar	bad application work day break month	Negative	App Store	1	1	0
App Store	7da44ac6-2d25-40eb-bf8f-f138557720db	hariga18	4/29/22 15:16	محمد				en	gb	alrajhi	A very useful and amazing application.	ar	useful amaze application	Positive	App Store	0	0	0
App Store	84f3ac51-ddb8-442b-9184-759dced953ec	هوميوباثي	5/12/22 19:55	خدمة ممتازة				en	gb	alrajhi	Excellent and convenient service. May Allah reward you.	ar	excellent convenient service may allah reward	Positive	App Store	1	0	0
App Store	02e3c59b-26cd-4c7f-be7b-59534f32ab00	Abdullah Jeddah	4/27/22 10:12	النظم الإلكترونية لمصرف الراجحي				en	gb	alrajhi	The electronic systems of Al Rajhi Bank are excellent and meet the purpose. The banking operations I need are always available in the easiest way. Their applications are always updated and distinguished compared to other banks' applications that I have used locally or internationally. Thank you, Al Rajhi Bank.	ar	electronic systems al rajhi bank excellent meet purpose bank operations need always available easy way applications always update distinguish compare bank applications use locally internationally thank al rajhi bank	Positive	App Store	1	0	0
App Store	a1bb187e-e229-4e66-87cb-c411f095610e	1686:01:00	4/27/22 5:01	تطبيق سريع وفعال وفيه جميع مايحتاجه العميل				en	gb	alrajhi	A fast and efficient application that includes everything the customer needs.	ar	fast efficient application include everything customer need	Positive	App Store	0	0	0
App Store	f23b92df-e75f-4339-9b47-50fe5a5c69a6	wafaaaaaaaaa	4/25/22 11:21	افضل تطبيق بنكي				en	gb	alrajhi	The best and easiest banking application without a doubt.	ar	best easy bank application without doubt	Positive	App Store	0	0	0
App Store	09535f36-332f-4129-ae9e-15d892d178d8	abdullah alluhayb	4/21/22 16:05	متكامل وسهل				en	gb	alrajhi	One of the best banking applications in terms of quality and service.	ar	one best bank applications term quality service	Positive	App Store	0	0	0
App Store	f9d1e599-edb0-41dd-9d5d-bd87a46ce669	AlenaziA	4/16/22 11:27	جوال الراجحي				en	gb	alrajhi	Transfer it in banking applications with success.	ar	transfer bank applications success	Positive	App Store	1	0	0
App Store	783bd829-da69-4d16-ae97-67f9d23c1212	Ibrahimar	4/18/22 3:09	استعمال سهل وآمن				en	gb	alrajhi	Easy and secure to use, thanks to God.	ar	easy secure use thank god	Positive	App Store	0	0	0
App Store	950bff3d-bccc-4b36-9593-a3b384aa5e79	انس ممدوح	4/10/22 11:21	عجبني				en	gb	alrajhi	Excellent very much	ar	excellent much	Positive	App Store	0	0	0
App Store	5d68adef-329a-45ee-9e66-63770146bcde	Computer networking	4/4/22 22:54	ممتاز				en	gb	alrajhi	"Very wonderful application. Thank you, Al Rajhi Bank."	ar	wonderful application thank al rajhi bank	Positive	App Store	0	0	0
App Store	f504f7eb-bcd9-4322-9a62-acb267eb81d2	كوووووووويسسسسسسس	4/2/22 19:09	تيماء				en	gb	alrajhi	Wonderful	ar	wonderful	Positive	App Store	0	0	0
App Store	3624d56a-08e1-4c45-8f40-962dfd1352ba	Khalid kh	3/26/22 23:06	تطور كبير				en	gb	alrajhi	Thank you very much for the great development and wonderful user interface. It's much better than the old application.	ar	thank much great development wonderful user interface much good old application	Positive	App Store	0	0	0
App Store	9970526e-f218-4701-b1f3-edd69e6cf8dd	maram5353	3/28/22 19:30	I				en	gb	alrajhi	Best Bank ever	en	best bank ever	Positive	App Store	0	0	0
App Store	1b05786a-6f04-48bb-844d-029aa2e93a36	shamkh_alyami	3/28/22 11:51	البرنامج له فترة طويلة جدًا يعلق				en	gb	alrajhi	The updates and development caused a malfunction in the program to the extent that I had to return to using the computer directly because it doesn't work at all.	ar	update development cause malfunction program extent return use computer directly doesnt work	Negative	App Store	0	1	0
App Store	04a1686a-976c-499c-aca7-c458d3439b2b	mesferal	3/26/22 19:25	ممتاز				en	gb	alrajhi	The application is very easy to use and clear.	ar	application easy use clear	Positive	App Store	0	0	0
App Store	4144a057-90ff-42eb-8df7-69a2fb9b2f1c	nxukI	3/15/22 11:03	amazing				en	gb	alrajhi	Best Saudi bank app ever	en	best saudi bank app ever	Positive	App Store	0	0	0
App Store	070650ab-422b-40e7-9133-eba73814b709	A.Alesssa	3/12/22 8:41	خدمة رائعة				en	gb	alrajhi	Beautiful and user-friendly application, thank you very much ðð»	ar	beautiful userfriendly application thank much	Positive	App Store	1	0	0
App Store	8b385098-519d-49d9-9b40-b2fc4b93fcfa	د سلطان بن موسى	2/27/22 6:07	تطبيق رائع				en	gb	alrajhi	The bank has improved for the better, with a smooth and amazing application that doesn't lag â¤ï¸â¤ï¸â¤ï¸	ar	bank improve good smooth amaze application doesnt lag	Positive	App Store	1	0	0
App Store	62413943-0150-4dcb-b7ba-d0b50524e695	Alinaji123	2/22/22 14:21	تقييم التطبيق				en	gb	alrajhi	The best banking application worldwide.	ar	best bank application worldwide	Positive	App Store	0	0	0
App Store	6907ded5-f966-4a7d-8054-1def5de971ff	Wi8 ni8	2/16/22 14:23	تطبيق ممتاز				en	gb	alrajhi	Excellent, fast, practical, and keeps up with all needs and progress.	ar	excellent fast practical keep need progress	Positive	App Store	0	0	0
App Store	55765007-8016-4bc0-b18b-75230fe3f291	Ahmed233	2/15/22 7:54	بطل				en	gb	alrajhi	"I'm busy and tired."	fa	im busy tire	Negative	App Store	1	0	0
App Store	d93724c9-7271-42f7-8b13-f5ca60c317f4	ABC-K	2/15/22 19:08	👌				en	gb	alrajhi	"Adding international transfer remains as easy as STC PAY."	ar	add international transfer remain easy stc pay	Neutral	App Store	0	1	0
App Store	b3de26b3-0c86-47db-a55a-daf423468c18	Abu Rahaf.	2/14/22 13:01	سهولة الوصول للبيانات المطلوبة				en	gb	alrajhi	Easy and accessible services, and diverse. I suggest adding additional currencies to the Plus Travel card.	ar	easy accessible service diverse suggest add additional currencies plus travel card	Positive	App Store	1	0	0
App Store	38d6c46f-2747-4518-ab60-bad3d73daa63	Nasser RAJHI	2/5/22 11:41	ممتاز				en	gb	alrajhi	Very excellent services.	ar	excellent service	Positive	App Store	0	0	0
App Store	58d51a1d-0416-4464-bd10-efc4feb4d011	عبدالعزيز ا ع ع ا الغامدي	1/27/22 22:08	ممتاز				en	gb	alrajhi	Excellent services and ease of use in the application.	ar	excellent service ease use application	Positive	App Store	0	0	0
App Store	699c80fc-2c55-4236-a638-fcd355db6a16	Alolayani	1/26/22 18:23	ألف شكر				en	gb	alrajhi	Multiple options, ease of access, and simplicity of design.	ar	multiple options ease access simplicity design	Positive	App Store	1	0	0
App Store	30203814-4ef2-4868-abd5-344328d70214	الدكتورة نهى	1/25/22 6:46	سهل الاستخدام				en	gb	alrajhi	Easy and clear application	ar	easy clear application	Positive	App Store	0	0	0
App Store	74d59686-d174-4929-a705-804edf8ef7e1	د سعيد الغامدي	1/10/22 15:57	تطبيقكم البنكي رائع				en	gb	alrajhi	Your application is easy and wonderful. May Allah protect and bless you and may you achieve more excellence and success.	ar	application easy wonderful may allah protect bless may achieve excellence success	Positive	App Store	1	0	0
App Store	30ddaa10-b55f-44de-9f32-85287bbf7d49	T.KSA	1/3/22 21:01	ممتاز				en	gb	alrajhi	Excellent update	ar	excellent update	Positive	App Store	0	0	0
App Store	f4b50acb-66c1-4e5b-8b1a-8e8de2bd6557	Saeed Wassam	1/3/22 8:15	عميل يحترم بنك الراجحي				en	gb	alrajhi	Al Rajhi Bank is great, and the owners, upper management, and employees of the bank are all exceptional. They always strive to enhance their services. Thank you from the bottom of my heart.	ar	al rajhi bank great owners upper management employees bank exceptional always strive enhance service thank bottom heart	Positive	App Store	1	0	0
App Store	14e93544-4c05-4838-9833-cb93ba8e2613	LvGamz	4/26/22 21:26	SIMPLY EXCELLENT…. 👍🏻				en	gb	alrajhi	SIMPLY EXCELLENTâ¦. ðð»	en	simply excellent	Positive	App Store	0	0	0
App Store	1ff14242-8ee8-4ca3-8871-d6ea4786b6b2	Hasaan14	4/21/22 1:05	D				en	gh	alrajhi	Hasaan	fil	hasaan	Neutral	App Store	0	0	0
App Store	e62404e7-2495-4aee-8fde-b722e730aa86	Omogh	2/24/23 13:34	Banking				en	gh	alrajhi	Great App for banking!!!	en	great app bank	Positive	App Store	0	0	0
App Store	6b73c267-eb23-48be-8e15-ef4865ec921f	Baridboyz82	8/19/23 21:50	bagus				en	id	alrajhi	sae pisanðððð	su	sae pisan	Neutral	App Store	0	0	0
App Store	9d8b7c00-4e9d-4290-93ed-07180dbca85e	Muhfa04	10/13/22 6:59	Good				en	id	alrajhi	Good app from other saudi m banking	en	good app saudi bank	Positive	App Store	0	0	0
App Store	d7eeaaa7-5b6c-4b79-bef2-fc9a9a8f4aa8	.z123	6/8/23 16:26	Poor app				en	id	alrajhi	Very hard just to login, weird app	en	hard login weird app	Negative	App Store	1	1	0
App Store	ed579733-ae4a-4cd5-ba51-4544c10c7bcc	nouval161	1/18/22 17:00	Good				en	id	alrajhi	No 1 app	en	app	Neutral	App Store	0	1	0
App Store	17e23307-6bd8-4624-9a19-7f68b3403808	Hendri henk	4/25/22 12:07	Hendri				en	id	alrajhi	BEST BANK IN SAUDI EVER	en	best bank saudi ever	Positive	App Store	0	0	0
App Store	0d79a12d-0f27-4eb3-b229-74b57b5fbe72	Foziyah Alqahtani	1/30/22 12:27	Outstanding application				en	ie	alrajhi	I hope you keep your high standards in the service you are providing ð·	en	hope keep high standards service provide	Positive	App Store	1	0	0
App Store	a162316d-b5f0-4526-87ae-1f6f7dea9da1	Agaadir	4/21/22 15:10	Good				en	ie	alrajhi	Easy to use , but I didnât like the Ektitab new way. That you must open investment walet!!!	en	easy use didnt like ektitab new way must open investment walet	Negative	App Store	1	0	0
App Store	211a8b60-0f71-488a-8cc2-4cacf61704b7	arman_haider	3/29/23 21:32	The App is super smooth and fast				en	in	alrajhi	I always used to dislike the UI of Alrajhi app since 2017 due to slow process and interlink of mubasher website. But from past 2 years the new update is getting better with time its buttery smooth and fast. Its so reliable and user friendly now. Alrajhi is the only bank where you don't need to visit branch as everything is working fine on your finger tip.	en	always use dislike ui alrajhi app since due slow process interlink mubasher website past years new update get good time buttery smooth fast reliable user friendly alrajhi bank dont need visit branch everything work fine finger tip	Positive	App Store	1	0	1
App Store	e0803364-9079-4128-8d25-91dead691763	Shabilmail	3/28/22 6:18	Well organized banking app				en	in	alrajhi	The recent updates are well enough to bring this to top of banking apps.	en	recent update well enough bring top bank apps	Positive	App Store	0	0	0
App Store	bb86e32b-b2ca-46e9-baeb-02c3e59e2a1d	MajiMacPro	2/15/22 20:16	Quality				en	in	alrajhi	Brilliant build quality..amazing security features Easy to use	en	brilliant build qualityamazing security feature easy use	Positive	App Store	1	0	0
App Store	9231133e-93eb-4a43-96d4-d7125bc91a49	ajithmohanan	3/5/23 15:57	Credit card applications				en	in	alrajhi	Excellent service and good services	en	excellent service good service	Positive	App Store	0	0	0
App Store	39db57a0-e3a9-4fe7-a775-f2c3f74b639a	GKSXi	9/7/23 15:24	Not Able to open a account				en	in	alrajhi	Hi Dev Team, I am not able to bank account. Itâs showing message âDear Customer, this service is not available now.â	en	hi dev team able bank account show message dear customer service available	Negative	App Store	0	1	0
App Store	f9080fba-0bef-4e68-87ae-95b6f645536a	bijushivan	4/1/22 15:08	Since 12 years I am very much happy and satisfied by the Lucky Customer 😊😊😊				en	in	alrajhi	Really Satisfied ððð	en	really satisfy	Positive	App Store	0	0	0
App Store	6d20aa75-e0b2-4864-aff3-9da16960b5e6	iftikharcbsa	2/13/22 16:47	Services				en	in	alrajhi	I have recently started banking with Alrajhi past 12 years I am using SABB but I will feel better with RAJHI God bless ðð¼ðð¼ðð¼ðð¼	en	recently start bank alrajhi past years use sabb feel good rajhi god bless	Positive	App Store	0	0	0
App Store	84191105-32ea-4198-a48f-632b360e4afc	ibufathi	5/15/22 6:20	New look, elegant.				en	in	alrajhi	New look, elegant style and amazing experience while using	en	new look elegant style amaze experience use	Positive	App Store	0	0	0
App Store	28a2ffca-6de5-4adc-bb61-ab0fadc127c1	Mdkashifalam91	4/20/22 10:52	Not able to add any bill through app				en	in	alrajhi	After giving billing account details then go through and app suddenly crashes and closed all the time	en	give bill account detail go app suddenly crash close time	Negative	App Store	0	1	0
App Store	06282997-2c63-4cb4-8a00-ab3b35f3e8df	Ahsan-Isha	1/24/22 10:21	Helpful ❤️				en	in	alrajhi	Very easy interface and helpful according to the requirements.	en	easy interface helpful accord requirements	Positive	App Store	0	0	0
App Store	b54a41b0-3ec0-4228-bc11-ac76472687b5	saibunnisa	2/3/22 7:23	Superb				en	in	alrajhi	Nice experience. Quick and easy and comfortable also.	en	nice experience quick easy comfortable also	Positive	App Store	0	0	0
App Store	7e2706f5-bb0c-4d38-824d-e94b96521428	ramchan3585	1/26/22 8:17	International Transfer is not working				en	in	alrajhi	International Transfer is not working in my account, so please activate.	en	international transfer work account please activate	Negative	App Store	0	1	0
App Store	4b7f8d08-3123-4550-b9ea-bbff26de6a33	Abdullah ....	3/22/22 15:58	Excellent				en	in	alrajhi	Application is very friendly use	en	application friendly use	Positive	App Store	0	0	0
App Store	e91587e4-7e5c-43b0-9788-556b66127627	Sreekanth Varanasi	6/11/22 22:09	Great application				en	in	alrajhi	Great easy and user friendly application	en	great easy user friendly application	Positive	App Store	0	0	0
App Store	3e4b3c38-4891-4ced-ac9a-3f89ccd93d6e	RRMOFFICIAL	5/2/22 16:30	Very Good				en	in	alrajhi	Itâs very great experience. Easy and Simple User Interface and fast processing.	en	great experience easy simple user interface fast process	Positive	App Store	0	0	0
App Store	6d6cdfcc-105d-4224-9922-019a2791dcdd	s_u_jay	4/6/22 7:27	Amazing Service				en	in	alrajhi	Love the latest digital service	en	love late digital service	Positive	App Store	1	0	0
App Store	3ecdb48e-8475-4eaa-ad64-8c599fb41412	Faruque nature	8/8/22 8:11	Very user friendly				en	in	alrajhi	Best bank in the world	en	best bank world	Positive	App Store	0	0	0
App Store	3ba308c7-32e4-4147-bd79-3e9940165ad4	Ashif486	7/3/23 11:38	Worst experience				en	in	alrajhi	I couldnât be able to make any international transfer through this application itâs always sayâs need to update Arabic full name If I visit the branch they said that âwe canât do anything itâs a technical problem â	en	couldnt able make international transfer application always say need update arabic full name visit branch say cant anything technical problem	Negative	App Store	0	1	0
App Store	3990afff-144c-4998-b6e8-b2695d612ce0	Amit112929588	8/26/22 8:42	Awsome				en	in	alrajhi	Easy to use application and very customer oriented. Thank you for your Service Al Rajhi	en	easy use application customer orient thank service al rajhi	Positive	App Store	0	0	0
App Store	453f5d64-b10e-4d18-a60f-c219fcce14e7	azharu uddin 78	3/31/22 8:34	Very nice application and easy to use				en	in	alrajhi	Good service	en	good service	Positive	App Store	0	0	0
App Store	01b91bff-aaa8-491d-bba7-b8c4e1231da2	Arnita Kareem	5/1/22 17:03	Updated version crashes				en	in	alrajhi	Updated version is not working properly ..it keeps crashing again n againâ¦	en	update version work properly keep crash n	Negative	App Store	0	1	0
App Store	f669811d-7897-4bb0-b0e5-17b0a8ddfd5b	abdunnassar	7/9/23 9:34	service				en	in	alrajhi	Service good	en	service good	Positive	App Store	0	0	0
App Store	2516c380-0922-4a2d-9428-9c8e5741310c	Arshadmoosa	3/5/22 18:38	Amazing				en	in	alrajhi	Amazing interface, ease of access	en	amaze interface ease access	Positive	App Store	0	0	0
App Store	a93fefe9-af70-41bf-bae2-12417647be18	Muthukumar GEZE	2/5/22 11:16	Application				en	in	alrajhi	Very easy to use awesome application	en	easy use awesome application	Positive	App Store	0	0	0
App Store	0d26b9f9-79c0-4ad9-967a-a889c47ffa70	L.Messi10 1	4/28/22 18:25	Excellent service				en	in	alrajhi	Really excellent service	en	really excellent service	Positive	App Store	0	0	0
App Store	c64809e7-46b1-4689-ba02-ee1d2c0f7543	Riyas bin qassim	5/8/22 15:37	Int’l Money Transfer				en	in	alrajhi	So Easy to use but Im waiting o see how fast it transferred.	en	easy use im wait see fast transfer	Positive	App Store	1	0	1
App Store	cd3121d3-6cf8-451f-82c1-3dbaf5d619aa	bgggjkkg	6/29/22 15:57	App is not working 🙏 iOS issues				en	in	alrajhi	App is not working ð iOS issues	en	app work ios issue	Negative	App Store	0	1	0
App Store	52a81bc7-cb6d-4bea-826b-9eb924fcc235	Gabriel Selvin	6/19/22 11:33	Location issue				en	in	alrajhi	How to enable location in iPhone 13 pro max	en	enable location iphone pro max	Neutral	App Store	0	1	0
App Store	29c60e4f-be3b-4ed3-bea8-65fb3e053199	Nisamhassan	4/11/22 7:10	User friendly App				en	in	alrajhi	Please add international price estimator	en	please add international price estimator	Neutral	App Store	0	1	0
App Store	29e0dc72-39ba-4da6-b721-4a9f3da8af99	mifzal-mifra	5/10/22 10:29	Al Rajhi Net Banking				en	in	alrajhi	Safe and best way to transfer money I trust for more than a decade.	en	safe best way transfer money trust decade	Positive	App Store	0	0	0
App Store	e5c48fbf-7979-48fa-b02b-f98fe7d15320	bashariya	10/7/22 17:13	Nice service				en	in	alrajhi	Good thank s a lot	en	good thank lot	Positive	App Store	0	0	0
App Store	36d8ed50-ef49-4e80-8cab-8ff75715d7d9	Saih Aboobacker	6/9/23 14:36	Review				en	in	alrajhi	Easy to operate the bank	en	easy operate bank	Neutral	App Store	0	0	0
App Store	11da0011-e2ae-486a-8269-03b2c5e9cf8b	SAZAAA.1	2/23/22 16:54	Robust App				en	in	alrajhi	Pretty much everything is at finger tip	en	pretty much everything finger tip	Neutral	App Store	1	0	0
App Store	46989fe1-64af-4ae1-b4dd-515d277ab883	abulk2490	2/23/22 13:00	Smooth				en	in	alrajhi	Very smooth app i think lot of money invest Al rajhi for this app	en	smooth app think lot money invest al rajhi app	Positive	App Store	0	0	0
App Store	256bf6e6-c6e0-4002-bca4-c10a5fe2de71	sajithannikoth	4/7/22 5:46	Fund transfer				en	in	alrajhi	Very easy and secure method	en	easy secure method	Positive	App Store	0	0	0
App Store	c4040c0d-ce7c-4f44-b89a-9f003692411d	Rajkiran22	6/5/23 6:39	best				en	in	alrajhi	Best banking app very smooth	en	best bank app smooth	Positive	App Store	0	0	0
App Store	f22360d4-1c74-484a-bbe4-b4f3df6589e2	mshabeebm	4/5/22 21:25	Excellent service				en	in	alrajhi	Super	en	super	Positive	App Store	0	0	0
App Store	372a6230-5908-40e4-9173-26ad5c9daf30	Saju mon	5/18/22 1:09	Mr SHERIEFF P				en	in	alrajhi	More than faster and convenient before	en	fast convenient	Positive	App Store	0	0	0
App Store	022458cf-b45b-4f5c-a0b2-df919ef0254f	Azmianzar	4/29/22 14:26	Nice experience				en	in	alrajhi	Thank you Al Rajhi for developing this app. Nice experience	en	thank al rajhi develop app nice experience	Positive	App Store	0	0	0
App Store	0db0d306-ad2f-4a6d-8747-02a765b01dc6	very good sarvic	7/1/23 5:21	Helpful for me thanks				en	in	alrajhi	Good app	en	good app	Positive	App Store	0	0	0
App Store	a2c376f9-8fa8-487d-91b6-5867e6ea7253	SHANU776	2/18/23 4:59	The account service and sever is gooo				en	in	alrajhi	Nice banking	en	nice bank	Positive	App Store	0	0	0
App Store	d85b139c-9ffd-4907-856d-68b2bb2e2936	Thulasingam prings	4/27/22 4:38	Good				en	in	alrajhi	Good user friendly	en	good user friendly	Positive	App Store	0	0	0
App Store	51f615be-5836-4d8a-b1f8-50affabe66bf	saheelcfc	5/8/22 22:00	Good				en	in	alrajhi	All are good ..ðð» But .. how to change exchange rate ..?	en	good change exchange rate	Neutral	App Store	1	0	0
App Store	db15e1b2-e996-4d1a-a64e-fa701bbd6b23	Ameen al rahman	5/12/22 8:52	Best banking app				en	in	alrajhi	The best bankil app i ever seen	en	best bankil app ever see	Positive	App Store	0	0	0
App Store	ceeced38-40a0-4bbf-a45c-65d33f484e38	Suhail cholayil	4/27/22 8:37	Good experience				en	in	alrajhi	Good experience	und	good experience	Positive	App Store	0	0	0
App Store	a66a4bd6-8ef7-4ba5-ac53-1ba3b14081ee	BSGhose	3/19/23 10:32	App Freezes				en	in	alrajhi	App freezes when I try to add International beneficiary by selecting the country.	en	app freeze try add international beneficiary select country	Neutral	App Store	0	1	1
App Store	1b79a24f-8414-49bc-a4ea-c9e445f037c3	feeroz	1/2/22 12:31	Service				en	in	alrajhi	Goood	ms	goood	Positive	App Store	0	0	0
App Store	0eea7b33-1938-4e25-883b-b9231cc00647	Sada Ys	5/25/22 13:55	Awesome Banking				en	in	alrajhi	Great experience ð	en	great experience	Positive	App Store	0	0	0
App Store	961710e0-bc25-4859-96c5-8b3c35a67a89	Ajijas	5/17/22 7:34	Good				en	in	alrajhi	Awesome experience	en	awesome experience	Positive	App Store	0	0	0
App Store	61c877f4-3530-4b8c-b2a7-127967395e5e	keethadath	2/26/22 9:31	Essy access				en	in	alrajhi	Essy access	en	essy access	Neutral	App Store	0	1	0
App Store	a5070d7e-c733-4fe9-926b-b8da9c360cf9	kuldeep78	5/4/22 11:55	Awesome				en	in	alrajhi	Its very good	en	good	Positive	App Store	0	0	0
App Store	d6bfbc94-b56e-495e-9238-5f8cb0de7d6f	abdnish	3/21/22 18:14	Amazing				en	in	alrajhi	Good one	en	good one	Positive	App Store	0	0	0
App Store	b94f894b-0313-4e7d-9f47-2c63d455776b	fasnajali	4/28/22 3:54	Good				en	in	alrajhi	Good and fast	en	good fast	Positive	App Store	0	0	0
App Store	c0d97c69-1eda-403c-a3b5-eaf8702ae704	Abduldada06	7/18/23 12:17	Fraud				en	in	alrajhi	Alrajhi is not secure Cheaters taking ammount without otp Without inform Itâs been with me	en	alrajhi secure cheaters take ammount without otp without inform	Negative	App Store	1	1	0
App Store	328c4f1a-682f-47ca-9d18-3d0622a99141	balgamesh	8/25/23 16:46	Fastest!!				en	in	alrajhi	Love the app ð	en	love app	Positive	App Store	0	0	0
App Store	fd65af50-6256-4155-b2a1-b5eeab956656	sadiqjfr	5/10/22 15:27	Sadiq				en	in	alrajhi	Like it	en	like	Neutral	App Store	0	0	0
App Store	a2e95cd6-561a-4a60-bdac-177650a224de	sameem ali	7/30/23 20:37	Al Rajhi				en	in	alrajhi	So naic the best	en	naic best	Positive	App Store	0	0	0
App Store	5a69a41d-3767-45df-bdbf-c716e7c21997	Anwar Kanakkot	5/1/22 1:18	Good				en	in	alrajhi	It is nice	en	nice	Positive	App Store	0	0	0
App Store	2807318b-8676-44b5-bbd2-ce7278c0b027	سيد vkm	11/12/22 9:30	Good				en	in	alrajhi	Thank you very much. May Allah reward you with goodness.	ar	thank much may allah reward goodness	Positive	App Store	0	0	0
App Store	46294b06-4c84-4b82-840e-de6ebbe2904b	vrishcons	5/4/22 7:25	Best bank				en	in	alrajhi	Best exchange rate given	en	best exchange rate give	Neutral	App Store	0	0	0
App Store	5833d0de-e378-4237-82af-7ed61da79b24	zakhuss	4/27/22 8:49	Excellent				en	in	alrajhi	Excellent and simple to use	en	excellent simple use	Positive	App Store	0	0	0
App Store	174d0f62-ddf6-4a04-8e09-1e3a282b087f	siniyas	3/5/23 10:21	Very user friendly				en	in	alrajhi	So good for online transactions,the app also very user friendly.any one can it easily	en	good online transactionsthe app also user friendlyany one easily	Positive	App Store	0	0	0
App Store	364f4fea-13a2-4e3c-86ed-3fa492700728	Linkingpeople2003	4/27/22 8:26	Excellent!				en	in	alrajhi	Excellent! Keep it up! May Allah reward you! Happy Ramadan! Welcome and Thanks! Facebook: Ajay Simon Richard. Iqama: 2484676941 Mobile: 0966-501905156 WhatsApp 0091-9430365425	en	excellent keep may allah reward happy ramadan welcome thank facebook ajay simon richard iqama mobile whatsapp	Positive	App Store	0	0	0
App Store	00ee149a-6e1d-4383-8488-e0b72151610b	persian catareeba	4/27/22 5:29	Wonderful bank				en	in	alrajhi	Wonderful bank	en	wonderful bank	Positive	App Store	0	0	0
App Store	349296b0-f1aa-4574-bd2a-b15714645cc6	Prince Amor	4/21/22 7:08	One of the best				en	jo	alrajhi	One of the easiest and best user-friendly applications. I also like the design and colors.	en	one easy best userfriendly applications also like design color	Positive	App Store	0	0	0
App Store	de9775c9-f8d6-4b0a-8d86-fa6917d071c5	messaq	2/9/22 6:46	Very Practical and intuitive				en	jo	alrajhi	Practical and intuitive.	en	practical intuitive	Positive	App Store	0	0	0
App Store	c6dfd6ad-0538-44ed-aa20-d9ad0c4ed037	Ahmadrob	4/9/22 8:47	Great Bank				en	jo	alrajhi	No 1 in finance ðº	en	finance	Neutral	App Store	0	0	0
App Store	c1f589bc-f774-4d9d-bfb9-10b71f267b50	ابو محمد العنابي	9/9/22 15:31	Very bad app				en	jo	alrajhi	No reliability on such financial app due to updates which interrupt the services, could not access it from 4 days ago	en	reliability financial app due update interrupt service could access days ago	Negative	App Store	0	1	0
App Store	5af56fba-1d27-4f83-a281-136559882348	عصام هاشم الصرايره	8/24/23 1:14	عرعر				en	jo	alrajhi	"Masha'Allah, the bank is really excellent. It provides all the support. Esam Hashem."	ar	mashaallah bank really excellent provide support esam hashem	Positive	App Store	0	0	0
App Store	5dd115b0-09df-4d06-a6f1-963b9bee07d4	XZz_Yassin	4/28/22 14:58	أفضل تطبيق بنكي استخدمته بحياتي ♥️💪				en	jo	alrajhi	The best banking application I have ever used in my life â¥ï¸ðª	ar	best bank application ever use life	Positive	App Store	0	0	0
App Store	57f60b58-f6a8-41e4-82c7-c892d695326c	palestine river to the sea	7/18/22 14:47	افشل تجربة				en	jo	alrajhi	A frustrating experience in a life application, especially when adding a new beneficiary... if you press "done" before receiving the call, you cannot add this beneficiary, even if you have performed Hajj and repented for all your sins, and the application shows that the beneficiary is there, but they are not actually there... a failed experience and a failed application in all countries of the wo…	ar	frustrate experience life application especially add new beneficiary press do receive call add beneficiary even perform hajj repent sin application show beneficiary actually fail experience fail application countries world	Negative	App Store	1	1	0
App Store	4df88235-5299-4e37-8cad-dc7dbf0bd723	frasky1990mohammed	1/12/22 8:32	Fraskyana				en	jo	alrajhi	The Al Rajhi application is excellent and very easy to use. It is very clear and wish you all the best! ð	ar	al rajhi application excellent easy use clear wish best	Positive	App Store	0	0	0
App Store	0959fc55-90e1-4e9f-bea5-cf6f074a663d	موفق الخطيب	9/4/23 6:06	سيئ				en	jo	alrajhi	I am really hanging on a lot.	ar	really hang lot	Neutral	App Store	1	0	1
App Store	b2d60553-c5cf-4c62-9702-b49e6be343a7	ف ع ج	2/4/22 13:13	Rajhi Bank / app.				en	kw	alrajhi	Excellent app. Great development, very easy to use without any complications. The app is more than wonderful, it provides easy access to banking operations quickly and without any complications. Thank you, Al Rajhi Bank. ððð	ar	excellent app great development easy use without complications app wonderful provide easy access bank operations quickly without complications thank al rajhi bank	Positive	App Store	0	0	0
App Store	6591a6e1-11f4-4b3e-896f-f8d0105e397d	طلال٢٦٧٤	3/11/22 14:59	Gj				en	kw	alrajhi	Gj	en	gj	Neutral	App Store	0	0	0
App Store	b7a6478f-ac15-41a7-aaf5-82daba07d2a2	أبوعبدالله	6/19/23 9:52	لتحميل التطبيق				en	kw	alrajhi	The application can be used with an international number.	ar	application use international number	Neutral	App Store	0	1	0
App Store	9ef90b99-457e-4cd2-be9e-12fe27bd5570	albadee	4/30/22 23:57	البدر				en	kw	alrajhi	May you be strong	ar	may strong	Positive	App Store	1	0	0
App Store	310b2117-0e0d-4b00-b997-f073f07679bb	عاشق باريس	4/28/22 22:25	❤️👍				en	kw	alrajhi	Excellent services compared to the services provided by Kuwaiti banks, as I am Kuwaiti.	ar	excellent service compare service provide kuwaiti bank kuwaiti	Positive	App Store	1	0	0
App Store	dc919ec7-720a-4e04-a54c-df263efe76fb	yousefhw	4/27/22 10:05	التحويل السريع				en	kw	alrajhi	Peace be upon you, In one of the updates that were made to the application, a fast transfer service was added without the need to send a code to the mobile, which was an excellent feature. However, it was quickly removed. What is required: - Bringing back the service with the option to opt out for those who do not wish to use it. - The ability to make multiple transfers at the same time for more …	ar	peace upon one update make application fast transfer service add without need send code mobile excellent feature however quickly remove require bring back service option opt wish use ability make multiple transfer time one person	Positive	App Store	0	1	0
App Store	aed48021-2a85-4fe1-a38f-d9a9408cac15	n29880	4/28/22 16:40	يلعق مره ينرفز				en	kw	alrajhi	The word "ÙØ¹ÙÙÙ" does not have a clear meaning in Arabic. It may be a typo or an incomplete word. Please provide more context or revise the spelling to a more accurate word so I can help you with the translation.	ar	word clear mean arabic may typo incomplete word please provide context revise spell accurate word help translation	Negative	App Store	1	1	0
App Store	dd358d2f-793e-44b9-8b32-8a71d10d5277	Aleneze 52	4/7/22 21:24	تقييم التطبيق				en	kw	alrajhi	Excellent service, thank you.	ar	excellent service thank	Positive	App Store	0	0	0
App Store	85660cca-e50d-4ac0-a51b-91e11c1b360c	abo fatmah	4/1/22 10:16	تطبيق جميل				en	kw	alrajhi	A beautiful application that saves a lot of time.	ar	beautiful application save lot time	Positive	App Store	0	0	0
App Store	8207b4fc-caed-41c4-8a4e-31d5f2356019	Altomy	3/4/22 9:52	4/3/22				en	kw	alrajhi	I wish you progress and prosperity always.	ar	wish progress prosperity always	Positive	App Store	1	0	0
App Store	262488b3-616d-419c-aece-9043ee66c049	bo 3thman	2/23/22 17:53	خطوه تحديث موفقه				en	kw	alrajhi	Masha Allah, a successful step and a good update that makes it easier for the user, unlike the previous updates that were bad and difficult, which made the customer frustrated.	ar	masha allah successful step good update make easy user unlike previous update bad difficult make customer frustrate	Positive	App Store	1	0	0
App Store	15318394-6646-47f7-bb38-d97c2bfe90f1	HamdiTal	2/8/22 14:55	برنامج جميل				en	kw	alrajhi	Quick solutions that eliminate the need to visit the branch.	ar	quick solutions eliminate need visit branch	Neutral	App Store	1	0	0
App Store	63647310-832f-42eb-b67e-75b08b1cdebb	جحمغةدثعهيركةبسشثاترر	2/8/22 5:45	امتياز امتياز امتياز امتياز امتياز بارك الله لكم				en	kw	alrajhi	Very very good and very important, and extremely important.	ar	good important extremely important	Positive	App Store	0	0	0
App Store	4ab5785d-06cb-4053-913a-a597934f7aca	almlaa7	1/29/22 8:09	تنسيط المستفيد صعب				en	kw	alrajhi	There is no formatting for calling customer service except through phone, and Al Rajhi's security is very complicated.	ar	format call customer service except phone al rajhis security complicate	Negative	App Store	1	0	0
App Store	2d76f89b-df11-431f-b990-251e7f366297	أم مشاري بن محمد	1/16/22 18:47	مصرف ممتاز و في تطور وتجديد				en	kw	alrajhi	An excellent bank that is in development and renewal	und	excellent bank development renewal	Positive	App Store	0	0	0
App Store	2ce0738e-fdb3-473b-9f10-54b7ab104967	ابوخالد العنزي👍	1/9/22 17:26	برنامج مصرف الراجحي متميز جدا جدا				en	kw	alrajhi	And we thank them for their efforts.	ar	thank efforts	Positive	App Store	0	0	0
App Store	22d4b294-6f25-4d57-824d-776bd52e9d80	KALANAZI	6/2/23 13:50	Excellent and updated great interface				en	kw	alrajhi	Excellent and updated great interface	en	excellent update great interface	Positive	App Store	0	0	0
App Store	2d1489a9-7741-4f32-91df-0c2b0432f515	dileepa87	9/1/22 15:18	Good service				en	lk	alrajhi	Itâs very fast and users friendly, ð	en	fast users friendly	Positive	App Store	0	0	0
App Store	3f230818-04e9-4db2-bd25-6e20e74e8ac7	ennasayya	10/12/22 10:49	Tranfer				en	lk	alrajhi	Speed service	en	speed service	Neutral	App Store	0	0	0
App Store	4f951d80-4b3d-43fd-a561-3d863eae9100	nuuuw	12/2/22 8:42	Exit and Re entry payment				en	lk	alrajhi	Can we do exit and re entry payment via mobile app? I cannot find the option	en	exit entry payment via mobile app find option	Neutral	App Store	0	1	0
App Store	71c83d76-b040-4a16-a535-00abf6b552d0	JayaBoy0506	3/13/22 22:25	Nice				en	lk	alrajhi	Very easy and fast	en	easy fast	Positive	App Store	0	0	0
App Store	b62417a0-1359-4434-8b0d-05090c3b627e	www ahamed	2/16/22 13:32	Good				en	lk	alrajhi	Good rate	en	good rate	Positive	App Store	0	0	0
App Store	4ad22460-30ab-4c64-852a-410e4c271bbf	alkady22	4/2/22 22:58	خدمة ممتازة				en	mx	alrajhi	Peace be upon you and may the mercy and blessings of Allah be upon you. The services are excellent.	ar	peace upon may mercy blessings allah upon service excellent	Positive	App Store	1	0	0
App Store	f39e1b41-0360-422f-a3dc-e240cc37b901	جهانزيب خان	1/23/22 6:27	Great application				en	my	alrajhi	good services. But itâs very to difficult to open bank account for a foreigner. Also the account get blocked if a expat is outside country for more then 3 months, since there are travel restrictions and expats are unable to come back on time, so the account must not be blocked due to COVID 19 travel restrictions	en	good service difficult open bank account foreigner also account get block expat outside country months since travel restrictions expats unable come back time account must block due covid travel restrictions	Negative	App Store	1	1	0
App Store	278a1661-cf8f-4bd3-aedd-09b0e7e377ab	Iancrunch	2/12/22 18:53	Very quick				en	my	alrajhi	An excellent service and fast to transfer weâll done	en	excellent service fast transfer well do	Positive	App Store	0	0	0
App Store	3d50749a-42e7-42cc-9e5b-c3316f4639bb	is150	3/28/22 3:39	Great apps				en	my	alrajhi	Easy to useâ¦ fast and a lot of banking features	en	easy use fast lot bank feature	Positive	App Store	0	0	0
App Store	a650670c-a1db-4974-8955-ad7f41aa6b25	KSAali	4/29/22 1:24	This is amazing app				en	my	alrajhi	This is amazing app	hi	amaze app	Positive	App Store	0	0	0
App Store	c5992867-268d-45ce-afae-3874df44e9c4	حسن الفطيمان	2/22/22 10:35	حائل - صبابة				en	my	alrajhi	Hail - Sobabah	ar	hail sobabah	Positive	App Store	0	0	0
App Store	0d6e253f-5a2c-45c4-9241-9c044404efa8	M I A 🦋	2/18/22 13:10	♥️				en	my	alrajhi	Very easy and beautiful and fast application ðð¼	ar	easy beautiful fast application	Positive	App Store	0	0	0
App Store	2d81babc-59f7-44a4-ad91-510156856eb4	Femorzz	6/13/22 15:10	flawless service				en	ng	alrajhi	Thanks for the great service.	en	thank great service	Positive	App Store	0	0	0
App Store	9aa9330a-38a4-40df-8adc-0deff424613f	MDaffairs	3/15/22 9:23	Excellent				en	ng	alrajhi	A satisfying and easy app you wanna bank with.	en	satisfy easy app wan na bank	Positive	App Store	0	0	0
App Store	c786e77b-fafe-4e27-9cd4-e46d01a436c8	Ugoo1	2/2/22 23:29	Review				en	ng	alrajhi	Great and seamless app. Also user friendly so far.	en	great seamless app also user friendly far	Positive	App Store	0	0	0
App Store	18e382f1-c79a-4ff0-a621-00d1dc1fff2d	Mahmood2011	4/24/22 9:54	الاسرع والاكمل والاسهل والمتميز				en	nl	alrajhi	The fastest, most comprehensive, easiest, and outstanding.	ar	fast comprehensive easy outstanding	Positive	App Store	0	0	0
App Store	3ea4e18f-c44f-4cda-be68-03978fbbd4cc	Hsa123sh	1/18/22 15:29	من أفضل التطبيقات البنكية				en	nl	alrajhi	Al Rajhi Bank still excels in electronic banking services.	ar	al rajhi bank still excel electronic bank service	Positive	App Store	0	0	0
App Store	2952b8c7-dced-4aa7-a735-002466d077f6	zezo-212	2/28/23 7:10	Good				en	nz	alrajhi	Very nice and Peter than before it good 10/10	en	nice peter good	Positive	App Store	0	0	0
App Store	061db560-c057-471e-b383-ddc7e207ca45	yasser ahmad alawd	4/16/22 21:14	Good				en	nz	alrajhi	Goodjob	en	goodjob	Positive	App Store	0	0	0
App Store	6ceb3d47-482d-409f-8332-086e234792a0	alwuhibi_suha	11/13/22 13:56	مميز				en	nz	alrajhi	Wonderful and easy.	ar	wonderful easy	Positive	App Store	0	0	0
App Store	a448cff3-b251-4675-9589-d58e5a627d4c	ابوسعد القويعية	4/30/22 13:20	ممتاز وجميل وسهل ويخليك ماتحتاج تروح للبنك بلعكس صار بنكاك معك				en	nz	alrajhi	I highly recommend it.	ar	highly recommend	Positive	App Store	0	0	0
App Store	840ba5d2-7ca3-41d6-8853-76568d29b1fe	عبيرالبطاح	4/28/22 16:01	الرياض				en	nz	alrajhi	Abeer Al-Batah	ar	abeer albatah	Neutral	App Store	1	0	0
App Store	11f4fb8e-5502-4065-befa-a048b8238af5	ابوخالد عنيزة	4/27/22 1:39	القصيم				en	nz	alrajhi	Hello, The new update is freezing, when I log into my account it suddenly kicks me out.	ar	hello new update freeze log account suddenly kick	Negative	App Store	0	0	1
App Store	b7da045b-2984-45f9-b552-e7607f2c8cad	بحر الاثاره	4/2/22 14:35	اسهل برنامج 😊				en	nz	alrajhi	The easiest program in everything, literally, is a champion. But if they make mistakes and bid farewell to me, how much will it cost?	ar	easy program everything literally champion make mistake bid farewell much cost	Negative	App Store	1	0	0
App Store	a5ddff80-c842-4d98-bac3-2e69d56dd116	amal.sss	3/27/22 10:26	الرياض				en	nz	alrajhi	Al Riyadh	ar	al riyadh	Neutral	App Store	0	0	0
App Store	f6900c5c-9a2c-4691-bfa2-bf10a528fc95	استاذة ثانوي	3/16/22 17:42	برنامج رائع				en	nz	alrajhi	Thank you and thank you for your outstanding services.	ar	thank thank outstanding service	Positive	App Store	0	0	0
App Store	9fc4aba6-74df-444f-b804-b4acb954d9be	AhmedHegazi	3/24/22 1:22	Ahmed				en	om	alrajhi	Easy and smart	en	easy smart	Positive	App Store	0	0	0
App Store	942b2111-f4e9-4265-8650-12ab9868cbb9	شمعون بيريز	4/25/22 13:38	مزبيطوا				en	om	alrajhi	Hamndar Ibn Safrajil Hello	ar	hamndar ibn safrajil hello	Neutral	App Store	0	0	0
App Store	22f8eb79-c3f7-4722-bc04-160f702f071a	cassanova507	5/15/23 9:34	تحديث سيئ				en	om	alrajhi	The new update is always hanging when logging in, and we hope this issue can be fixed.	ar	new update always hang log hope issue fix	Negative	App Store	0	1	1
App Store	1ef2d4d2-585b-4bcf-8c1b-a1723ddc761e	Haad19	3/14/22 21:51	Had19				en	om	alrajhi	.mnj	zu	mnj	Neutral	App Store	0	0	0
App Store	1576e6ac-f99d-4491-bdf1-ecd38cc7028d	NarsBey	5/6/22 20:03	Convenient and service excellence				en	ph	alrajhi	A typical OFW working as a Nurse in the kingdom having a very hectic schedule who really needs a convenient ways work on mobile banking services and remittances to and from the Philippines, Al rajhi bank is the Best choice for me. From Security to mobile banking mobile application, guaranteed no Hustle ððð	en	typical ofw work nurse kingdom hectic schedule really need convenient ways work mobile bank service remittances philippines al rajhi bank best choice security mobile bank mobile application guarantee hustle	Positive	App Store	1	0	0
App Store	949bdbd5-aecd-4732-b913-2c8dc201fdb6	viniakineme❤️	2/14/22 15:17	If you are thinkinv to use mobile banking app,				en	ph	alrajhi	This is your time to use especially this app. User friendly application!	en	time use especially app user friendly application	Positive	App Store	0	0	0
App Store	d1f0a328-4627-4a5a-96f3-dabea7f40062	noypi12345	1/25/23 11:42	Option for lock debit card and online transaction gone?				en	ph	alrajhi	Good day, I checked the app today and I noticed the options for locking my debit card and online transactions are gone. Kindly fix the app. Thanks	en	good day check app today notice options lock debit card online transactions go kindly fix app thank	Neutral	App Store	0	1	0
App Store	b21b4a63-5efa-4096-b888-e7cfb3c28fee	llgigabytell	3/3/22 9:17	I cannot send via international transfer🙁				en	ph	alrajhi	Why I cannot transfer by international transfer (bank to bank)ð©	en	transfer international transfer bank bank	Neutral	App Store	0	1	0
App Store	57b1a4b5-9d7c-410f-87fd-b8554cd681cf	Pepsi in saudi	4/9/23 11:28	Can’t receive OTP from my bank				en	ph	alrajhi	When i updated the application I cannot receive OTP from my bank please fix this thanks	en	update application receive otp bank please fix thank	Negative	App Store	0	1	0
App Store	effe93d5-aeff-4e4a-9406-684e476c2a41	marrah20	1/7/22 23:43	Good mobile banking				en	ph	alrajhi	Good mobile banking service with savings or current account but definitely not good in credit card concerns	en	good mobile bank service savings current account definitely good credit card concern	Negative	App Store	0	0	0
App Store	6edce5fb-1c6d-4c7b-a303-71f7098650b6	GeraldFuentes	9/8/22 12:14	Good day				en	ph	alrajhi	Its a pleasure to have this apps and physical cardâ¦ its easy to send and to put money. All in is very easy thanks	en	pleasure apps physical card easy send put money easy thank	Positive	App Store	0	0	0
App Store	92135ab8-379f-43e5-b0f5-82079d44401f	hsifhdbie	5/2/22 7:46	Convenient service				en	ph	alrajhi	Timely and convenient to use.	en	timely convenient use	Positive	App Store	0	0	0
App Store	5d0f2037-23e8-498e-990f-5a6cd79132c8	rain -rain	5/2/22 0:47	Easy transaction				en	ph	alrajhi	Very easy to send transfer to my love one and my family. Nice apps	en	easy send transfer love one family nice apps	Positive	App Store	0	0	0
App Store	b56154f7-b901-4c36-85d9-65156e696b88	021moly	3/20/22 7:14	White screen				en	ph	alrajhi	Every time I log in it just showing white screen. This app is not working after I update itâ¦ I can open my Alrahji account in another device but not in my phoneâ¦	en	every time log show white screen app work update open alrahji account another device phone	Negative	App Store	0	1	0
App Store	4987ff00-0121-4857-a46f-78b7208f6778	Madterjhing07	4/4/22 5:45	Transfer service				en	ph	alrajhi	Fast transactions. Thanks	en	fast transactions thank	Positive	App Store	0	0	0
App Store	69781310-e64c-49fa-b8f5-ce5dd3c4c6bd	angelie di	3/27/22 8:19	User friendly				en	ph	alrajhi	Very easy to use Very convenient Excellent app	en	easy use convenient excellent app	Positive	App Store	0	0	0
App Store	f0b9fc48-60e0-4193-baf0-bf86c23e1e58	jocelgrace	2/19/22 11:32	Mobile Banking				en	ph	alrajhi	The new mobile app is convenient and efficient to use. Thanks Al Rajhi	en	new mobile app convenient efficient use thank al rajhi	Positive	App Store	0	0	0
App Store	02a945d8-3a1a-4d3a-9d37-6cbdbc16abb4	halle-em	6/25/23 3:29	Accessible				en	ph	alrajhi	Everything is easy with alraji,thanks	en	everything easy alrajithanks	Positive	App Store	0	0	0
App Store	34892e86-478f-4216-b5e8-8fa9a2449532	bashbasting	3/1/22 13:55	Fast transaction				en	ph	alrajhi	It was so fast and easy to used the appâ¦ hassle free and can do it anytimeâ¦ i love Al Rhaji bankâ¤ï¸âï¸	en	fast easy use app hassle free anytime love al rhaji bank	Positive	App Store	0	0	0
App Store	ddd78614-8e7d-47bd-9643-dbc7b4c0312e	lex0317	9/28/22 8:09	To Al RajhiBank				en	ph	alrajhi	thank you for this app, easy to access anywhere anytime.	en	thank app easy access anywhere anytime	Positive	App Store	0	0	0
App Store	e2133218-ca08-428b-a938-ba2cd011c60d	Spencer Justine	10/27/22 2:07	Error english full name				en	ph	alrajhi	I'm trying to send money from my country. After that it show i need to update the english fullname then i filled up after that asking me again for full name many times repeatedly. Please do something.	en	im try send money country show need update english fullname fill ask full name many time repeatedly please something	Neutral	App Store	0	1	0
App Store	97c73c6e-dd10-435e-a782-ad8891d636bc	Aayeshahoo	4/27/22 8:22	Savings program				en	ph	alrajhi	Thanks for granting the savings program! Iâm glad you listen to your consumers! God bless!	en	thank grant savings program im glad listen consumers god bless	Positive	App Store	0	0	0
App Store	3e170020-4d87-4785-93e6-1db975c1fece	Madz A	5/2/22 18:37	Excellent Apps				en	ph	alrajhi	Convenient and easy to use	en	convenient easy use	Positive	App Store	0	0	0
App Store	9317fc74-bcec-4f7d-84f9-44f6d57994c7	RonnieMendozaMondia	8/4/22 17:35	Excellent				en	ph	alrajhi	Fast and convenient to use	en	fast convenient use	Positive	App Store	0	0	0
App Store	737e5352-aae2-4fa6-9abe-504e5f194cd1	Ruel2021	4/29/22 10:35	Transfer				en	ph	alrajhi	Easy to use and very good apps	en	easy use good apps	Positive	App Store	0	0	0
App Store	50cad041-99ee-4fc3-b0ef-5ca9a3b17ceb	Hdhshdjane	4/28/22 5:49	MPIN ACTIVATION				en	ph	alrajhi	I have a problem in activating the MPIN quick login. Everytime i request for activation it just popup some notification a call for a haf second and i cannot answer it. Please fix the MPIN QUICKLOGIN	en	problem activate mpin quick login everytime request activation popup notification call haf second answer please fix mpin quicklogin	Negative	App Store	0	1	0
App Store	bcef4248-fa62-48b8-afab-aeab0c222c43	edgarcalimot	4/30/22 16:27	On-line banking				en	ph	alrajhi	Convenient in your fingertips...	en	convenient fingertips	Neutral	App Store	0	0	0
App Store	608e8bb5-9f07-4264-b359-9676c434b4ab	1017nico	2/8/22 10:03	I cannot register				en	ph	alrajhi	I tried to register or to open for new account. It keeps on saying âyou already have an accountâ, how come? I never had an account on alrahji bank.	en	try register open new account keep say already account come never account alrahji bank	Negative	App Store	0	1	0
App Store	3bd8f71f-025a-4096-afd6-2b04aa429b08	Manaloto	4/10/22 23:28	Very Convinient				en	ph	alrajhi	Easy to use. No hassle	en	easy use hassle	Positive	App Store	0	0	0
App Store	cbb5828e-893d-4d63-9f2e-8f19d04b17f1	Sasarou	4/29/22 21:32	Compliment				en	ph	alrajhi	Very convenient. And low fee rate is excellent.	en	convenient low fee rate excellent	Positive	App Store	1	0	0
App Store	58d79e94-c4a8-49bd-9da5-c647779bffc8	joelkhalid	4/26/22 22:38	Very good banking application				en	ph	alrajhi	5 star	en	star	Positive	App Store	0	0	0
App Store	b7bd0b87-173e-4b0f-8898-869d2d72b9f8	monrhey	1/25/22 18:30	Fantastic job				en	ph	alrajhi	Great work	en	great work	Positive	App Store	0	0	0
App Store	e85364bf-eea1-4c59-b045-f8fbff836dea	um_ahmad24	3/29/22 8:20	Excellent				en	ph	alrajhi	Easy access..	en	easy access	Neutral	App Store	0	0	0
App Store	3e0f5d03-b120-4635-96c5-095bea79720e	danyonly	4/27/22 4:54	International transfer				en	ph	alrajhi	Convenient! â¤ï¸â¤ï¸â¤ï¸â¤ï¸â¤ï¸â¤ï¸â¤ï¸	en	convenient	Neutral	App Store	0	0	0
App Store	b912b777-6471-4233-8305-b96f7c548ffe	Kennytroyz	8/14/22 11:03	Easy to transfe				en	ph	alrajhi	Fast transfer	en	fast transfer	Neutral	App Store	0	0	0
App Store	2b806d9b-0893-4036-abe4-e699615e8cb5	leighnurse	1/1/22 10:16	Very good & fast				en	ph	alrajhi	5 stars	en	star	Positive	App Store	0	0	0
App Store	9b6f56d2-cefe-4016-a28f-71e58f3f6179	roelmae	3/3/22 11:41	Transfer				en	ph	alrajhi	This app is excellent ð	en	app excellent	Positive	App Store	0	0	0
App Store	f56ee0fc-a59d-41cc-b914-11c6474502a8	Ameramai	2/15/22 3:09	Transfusion transfer				en	ph	alrajhi	Amazing. Thank you AlRajhiBank	en	amaze thank alrajhibank	Positive	App Store	0	0	0
App Store	a0bc2112-87ba-419e-ad9e-f0875da49a2c	Ted_Salazar	3/15/22 4:11	Ted_Salazar				en	ph	alrajhi	Excellent system	en	excellent system	Positive	App Store	0	0	0
App Store	4b687999-56cb-4196-8b36-a940798b9d0d	JayRyanM	4/24/22 5:54	Ver				en	ph	alrajhi	Very convenient	en	convenient	Positive	App Store	0	0	0
App Store	105e68c5-de50-4778-80a3-10cc3977a0eb	Neng Jem	6/3/23 9:30	Happy clent				en	ph	alrajhi	Satisfied with the bank services	en	satisfy bank service	Positive	App Store	1	0	0
App Store	0961ed56-bdd1-491e-b27f-988210cab0cb	Shaunrenant	2/1/22 9:55	AL Rajhi Mobile app.				en	ph	alrajhi	Very useful and very good app. Thanks AL Rajhi	en	useful good app thank al rajhi	Positive	App Store	0	0	0
App Store	caf82711-ebbe-4c9a-b030-27e103816d4c	Nila Gumapac	4/5/22 9:29	Good Service				en	ph	alrajhi	Al Rajhi Bank is the best	en	al rajhi bank best	Positive	App Store	0	0	0
App Store	7949f275-f34c-4092-9db0-de18d781114d	dindin30	4/25/22 18:53	Reaction				en	ph	alrajhi	Great update.	en	great update	Positive	App Store	0	0	0
App Store	09eed7d7-fbf6-4035-8530-918b4b7cf6d9	tel1219	5/2/22 14:23	excellent app				en	ph	alrajhi	very nice and always accessible	en	nice always accessible	Positive	App Store	0	0	0
App Store	ee904440-2ea0-4f1a-ab4d-a21001a24ac7	spicehacker	6/22/23 18:25	amazing				en	ph	alrajhi	al rajhi apps is very transparent and easy to use	en	al rajhi apps transparent easy use	Positive	App Store	0	0	0
App Store	9949b50b-b0f8-4cc1-b25d-2e3e314899b5	GlessRMD0204	1/3/22 14:51	So fast, nice app!				en	ph	alrajhi	So fast, nice app! Thanks AlRajhi bank	en	fast nice app thank alrajhi bank	Positive	App Store	0	0	0
App Store	7b79ac2e-2489-494d-a012-6f31566c37cc	uMm zAh	4/3/22 22:24	Umm zAh				en	ph	alrajhi	Best World Remittance bank	en	best world remittance bank	Positive	App Store	0	0	0
App Store	a10309e7-b7c1-4f05-b9d7-fad2941590f7	angelmito	4/4/22 14:18	ok				en	ph	alrajhi	none	en	none	Neutral	App Store	0	1	0
App Store	87b3ff48-6030-4da9-af3c-9621d7e8f584	ahl81	3/9/23 1:45	so bad				en	ph	alrajhi	in transfering money i need to input the benificiary name in arabic why? but always error so disappiont	en	transfer money need input benificiary name arabic always error disappiont	Negative	App Store	0	1	0
App Store	129d483b-8fc0-4daf-af8d-37cb6c6b322a	RaveRuss	2/28/22 21:25	USEFULL				en	ph	alrajhi	USEFULL	en	usefull	Neutral	App Store	0	0	0
App Store	37a055bb-5620-4849-83d7-13a541131582	abo sae	7/24/23 11:00	روعه				en	ph	alrajhi	The best application.	ar	best application	Positive	App Store	0	0	0
App Store	d21554d0-e404-4770-a739-a87cd3ab1147	Perlita*	4/26/22 9:49	Perlita*				en	ph	alrajhi	Perez	en	perez	Neutral	App Store	0	1	0
App Store	6184a2ce-52d4-40cf-93ef-6713992f4a8f	01 lance	1/28/22 3:56	Fantastic				en	ph	alrajhi	Fantastic	en	fantastic	Positive	App Store	0	0	0
App Store	aa9f9adc-c2d7-42eb-ac5b-8266286eff54	frozetilldeath	4/26/22 2:34	Great banking experience				en	ph	alrajhi	Great banking experience	en	great bank experience	Positive	App Store	0	0	0
App Store	bd947a55-46c1-42d5-b5cd-427326c65a0d	Larpel29	5/18/22 18:06	Very nice				en	ph	alrajhi	very usefull at this time of pandemic.no hustle everything is in our hand.keep up the good workðð¼	en	usefull time pandemicno hustle everything handkeep good work	Positive	App Store	0	0	0
App Store	5ae860b2-acd2-4879-9450-e15bb3ec286c	meekguy	4/20/22 7:10	Kuwais!				en	ph	alrajhi	Miya miya	ja	miya miya	Neutral	App Store	0	0	0
App Store	b3b452c9-34dc-4857-bc82-f2fd74dc2494	ellchantress	2/28/22 10:27	Fast transaction				en	ph	alrajhi	Fast transaction	en	fast transaction	Positive	App Store	0	0	0
App Store	c4c6b473-97d0-45bb-9d13-bef0f98eb3c6	alipakistan	6/23/22 12:39	Location issue				en	pk	alrajhi	Iâm really sorry to say that from last 7 days Iâm trying to open an account but app says you have to enable your location while my mobile location is always on.	en	im really sorry say last days im try open account app say enable location mobile location always	Negative	App Store	1	1	0
App Store	358bfc80-ad86-462f-9dba-6d16402688df	Decore homes	7/28/23 15:59	Feel about Alrajhi app				en	pk	alrajhi	Iâm feeling very well to using Al rajhi mobile app because Iâm using all purchases from mobile no need to cash and wallet pocket.Iâm sure you care us all for future more then to present.ðð	en	im feel well use al rajhi mobile app im use purchase mobile need cash wallet pocketim sure care us future present	Positive	App Store	0	0	0
App Store	257dcb3e-230a-43ed-a4c5-c1c03b32f480	Ali Zrk	8/21/23 19:11	Create new account				en	pk	alrajhi	Itâs very hard and difficult to create a new account	en	hard difficult create new account	Negative	App Store	1	0	0
App Store	4329f055-ad50-47bf-83e4-b06d280b72bf	Hassam32	4/10/22 8:06	Fabulous services				en	pk	alrajhi	More than satisfied wonderful services. Keep it up .	en	satisfy wonderful service keep	Positive	App Store	0	0	0
App Store	51bf1082-fcbe-4add-bd94-0c712e26340e	Capricon36	4/1/23 0:18	Unable to login on same device with same credentials				en	pk	alrajhi	Sir i just logout and trying to login again but couldnât thereâs an error showing that you have reached maximum allowed numbers using this device. Canât login to my account	en	sir logout try login couldnt theres error show reach maximum allow number use device cant login account	Negative	App Store	0	1	0
App Store	306cc647-552a-4c63-a774-c6d74c721b1c	Awaiskhan1990	4/28/22 13:26	Very Good Services				en	pk	alrajhi	Very easy and useful banking app. Best and easy Banking Application simply Love it.	en	easy useful bank app best easy bank application simply love	Positive	App Store	0	0	0
App Store	d08908d1-ed39-434e-8aa2-d21795e49921	Fahdnsj	12/11/22 22:19	i can not trasfer money to international				en	pk	alrajhi	I have some issue using this app when i use to transfer money internation asked some Name in arabic and english ?	en	issue use app use transfer money internation ask name arabic english	Negative	App Store	0	1	0
App Store	2c4e698d-6009-4b11-8083-74aea8f9e8bf	saifi19	4/27/22 16:44	Trusted Bank				en	pk	alrajhi	The most trusted and fast bank	en	trust fast bank	Positive	App Store	0	0	0
App Store	cd71ab43-1871-4058-969a-5321700cd141	Zahid8456	2/28/22 7:49	Nice				en	pk	alrajhi	Feel good to have services	en	feel good service	Positive	App Store	0	0	0
App Store	135f2790-2fdc-487b-8e87-ae85a562133b	Asif Abro	1/5/22 17:23	Bank Al Rajhi banking experience				en	pk	alrajhi	Excellent banking experience with hassle free mobile banking.	en	excellent bank experience hassle free mobile bank	Positive	App Store	0	0	0
App Store	350e4971-818f-41c7-9125-f9dc8205fd38	IftiGilani	6/27/22 8:01	The mobile App is fast and services are Trustworth				en	pk	alrajhi	Thank u alrajhi shahG	en	thank u alrajhi shahg	Positive	App Store	0	0	0
App Store	cc9dc7a9-d148-4958-9d46-7b34aeb10128	Uxmii	6/10/23 6:26	Services very good and fast.				en	pk	alrajhi	Services very good and fast.	en	service good fast	Positive	App Store	0	0	0
App Store	1f6d35ec-1595-47e4-adb3-11417a9c28a2	Azaan islam	8/27/22 18:24	Experience				en	pk	alrajhi	Found best banking and management sustem ever	en	find best bank management sustem ever	Positive	App Store	0	0	0
App Store	593ec988-51b8-4d23-8149-467933a1f6bf	MK Khurram's	2/10/23 13:21	My Experience				en	pk	alrajhi	My experience with Alrajhi is very Good	en	experience alrajhi good	Positive	App Store	0	0	0
App Store	eaeb03ee-5fa9-4773-8bce-ccaea21426fc	mushi3200	2/2/22 22:29	Mishtaq ahmed				en	pk	alrajhi	Alrajhi bank e banking is very easy and convenient. Love it.	en	alrajhi bank e bank easy convenient love	Positive	App Store	0	0	0
App Store	bbd88a7e-ca8c-43f3-9a18-0925ffe458d6	Sssaamj	9/5/23 4:21	Al Rajhi team				en	pk	alrajhi	After last update I canât use app after opening then app is closing automatically please solve this issue	en	last update cant use app open app close automatically please solve issue	Negative	App Store	0	1	0
App Store	4a41fe1c-88cc-4789-adaa-f135f3f12263	Afraz khalid	5/15/22 6:06	Best Service Ever				en	pk	alrajhi	Love to use Al Rajhi App.. Much easier to use..	en	love use al rajhi app much easy use	Positive	App Store	0	0	0
App Store	07953a45-d30e-4431-b92b-8526b1a34351	Ahmi666	4/3/22 20:38	Best Banking App				en	pk	alrajhi	Best Experience And Up to Date App	en	best experience date app	Positive	App Store	0	0	0
App Store	25d648ac-4093-43ae-a6f1-f92fc63ee22b	hafeez niazi 2212	5/3/22 7:07	Love it				en	pk	alrajhi	Very good service I like it	en	good service like	Positive	App Store	0	0	0
App Store	43f1717b-719b-4a04-80cc-3b10245bb797	Mihsank	8/5/22 14:56	Bank Al Rajhi				en	pk	alrajhi	It is a good banking system i like the Bank Al Rajhi	en	good bank system like bank al rajhi	Positive	App Store	0	0	0
App Store	4f8bba77-5dfd-4a37-9b6c-e77714a6dbec	omerahsan	4/10/22 11:55	Alrajhi apl				en	pk	alrajhi	Very easy and shorts step to proceed	en	easy short step proceed	Positive	App Store	1	0	0
App Store	6e541ff6-7646-4f05-a1e5-8a909ef10467	Shazi1969	4/26/22 9:22	Review				en	pk	alrajhi	Feel proud to use Al Rajah banking	en	feel proud use al rajah bank	Positive	App Store	0	0	0
App Store	1c6d522e-0c90-4a8c-9d38-9214b6778638	Habibuk80	6/21/23 6:52	Service and Exchange Rates				en	pk	alrajhi	Good Services and the best exchange rates	en	good service best exchange rat	Positive	App Store	0	0	0
App Store	eaed1541-51eb-42ee-84c3-61cb3d46f297	gull1980	4/28/22 10:50	Too good				en	pk	alrajhi	Too good	en	good	Positive	App Store	0	0	0
App Store	b6114998-352c-4c9c-bfb8-3268c2c6c7aa	تاج البلوشی	9/4/23 14:17	Taj Muhammad				en	pk	alrajhi	Al rajhi bank app is very good	en	al rajhi bank app good	Positive	App Store	0	0	0
App Store	ce583ea4-7a17-405b-9697-3ff23a3ecc96	asimgondal	2/20/23 13:22	good app				en	pk	alrajhi	raji bank is the best bank in saudi	en	raji bank best bank saudi	Positive	App Store	0	0	0
App Store	92a5c775-1ddd-430b-ab30-5305ad5a3373	Samisagar	4/6/22 17:40	Rainmakers				en	pk	alrajhi	To good	en	good	Positive	App Store	0	0	0
App Store	339b0ea8-17b7-4804-8e87-ea5565060f03	khnji12	3/20/23 9:28	Transfers				en	pk	alrajhi	International transfers or adiing new international benefecries are not working .	en	international transfer adiing new international benefecries work	Negative	App Store	0	1	0
App Store	14d49a14-cb40-4626-8cf1-16b79229d7da	Pak Gems Mart	4/26/22 22:26	ABSHER				en	pk	alrajhi	Al Rajhi ABSHER	ar	al rajhi absher	Neutral	App Store	0	0	0
App Store	33bcdec2-7cc5-4980-932b-3b762cdbce50	Carl Arabia	7/3/22 12:24	Beneficiary				en	pt	alrajhi	Good morning, I had to go to a branch to add a beneficiary for international transfer. Should be possible to introduce a beneficiary directly on the mobile Al Rajhi app. We shouldnât have to go to a branch. The add beneficiary option is available on the app but it doesnât work on mine. Thank you, Carlos AssunÃ§Ã£o	en	good morning go branch add beneficiary international transfer possible introduce beneficiary directly mobile al rajhi app shouldnt go branch add beneficiary option available app doesnt work mine thank carlos assuno	Neutral	App Store	0	1	0
App Store	d949dedd-b662-4765-88cc-bbe17fdefe23	ajamil007	6/13/23 10:40	Great Service				en	qa	alrajhi	One stop service and impressive service. Love it	en	one stop service impressive service love	Positive	App Store	0	0	0
App Store	d81e7677-e7e7-4f49-bed8-ce5761853284	المستشار _1	4/20/22 18:52	برنامج جدًا رائع				en	qa	alrajhi	"Modern, advanced, and easy to use. Thank you."	ar	modern advance easy use thank	Positive	App Store	0	0	0
App Store	6b832c01-c6e4-4940-9f30-8639f2a7b033	Shokaib1	5/10/22 18:03	Digital visa card				en	qa	alrajhi	Visa digital card is not working on mobile application on iphone 12 pro. Kindly check.	en	visa digital card work mobile application iphone pro kindly check	Neutral	App Store	0	1	0
App Store	fc79fff4-cad1-4d6d-8c3f-7c5f5647deff	irfanPK	1/29/23 18:35	Fix it				en	qa	alrajhi	Itâs didnât work when I need it	en	didnt work need	Negative	App Store	0	1	0
App Store	9ba8bbbf-c8b2-4db2-8bd1-15b8367a1076	aaaaaa1991	11/28/22 4:48	اخر تحديث لايعمل				en	qa	alrajhi	Connection refused is written in Arabic as "ØªÙ Ø±ÙØ¶ Ø§ÙØ§ØªØµØ§Ù". The latest update is not working	ar	connection refuse write arabic late update work	Negative	App Store	0	1	0
App Store	8c48a6c5-31c5-4a5a-bfc5-faadb6949be3	Abdul Aziz M Ali	1/27/22 14:58	عالمي				en	qa	alrajhi	Honestly, the application and the quantities of services provided on it are global.	ar	honestly application quantities service provide global	Neutral	App Store	1	0	0
App Store	a1147770-4646-4625-8ec6-04ecbcfa245e	QH.5aled	12/6/22 20:41	Missing feature				en	sa	alrajhi	I donât know why they remove account information card from being added to Apple wallet? But for sure they need to reverse that decision!! One thing for sure !! My card can be very safe and secure inside apple wallet and I have very fast access to it!! literally , 2 click away. Yet, they decided to remove the card and every time I need to share my account number I need to open the app go through…	en	dont know remove account information card add apple wallet sure need reverse decision one thing sure card safe secure inside apple wallet fast access literally click away yet decide remove card every time need share account number need open app go lengthy process share picture need picture share open wallet screenshot share card dont know think process lead developers take decision bad decision e…	Negative	App Store	1	0	0
App Store	03f543ad-f1d5-4156-8872-33c03757e710	feru salim	5/8/22 16:38	The best banking experience in Saudi arabia				en	sa	alrajhi	The online bank has long been recognized for its killer customer service and for good reason. Not only are bank representatives available 24/7 by phone and by live chat, but the bank establishes expectations on how long you have to wait before you even try to call them. You can find the estimated wait time on its website as well as on its mobile app. The direct bank has also been a leader in othe…	en	online bank long recognize killer customer service good reason bank representatives available phone live chat bank establish expectations long wait even try call find estimate wait time website well mobile app direct bank also leader customer experience initiatives	Positive	App Store	1	0	0
App Store	ae5d3b9a-68a1-4cb2-b612-47a69940ef76	Crimson772	3/23/23 11:55	Mokafa Points system error in stores caused me to lose all my points !				en	sa	alrajhi	Despite being VIP customer; the cashier system at a store has taken all my mokafa points and failed to give me invoice confirming my purchase. Had to call Rajhi for > 30 mins transferred to 5 diff employees to get me to someone who can request my points to be refunded due to store system having error. The store claims they informed rajhi about it!. As a customer, I shouldnât be subjected to poo…	en	despite vip customer cashier system store take mokafa point fail give invoice confirm purchase call rajhi mins transfer diff employees get someone request point refund due store system error store claim inform rajhi customer shouldnt subject poor treatment error really put experience wait days get point thats tamayyuz customer im bite disappoint even submit complain store years customer	Negative	App Store	1	1	0
App Store	8b6bcfe4-3ce2-4879-92d9-932422674385	Saeed.Ali	1/21/22 17:17	Excellent improvements				en	sa	alrajhi	Guys, the app is good but asking if I'm enjoying the application every time is not good and it annoys people. Moreover, it leaves the app open and redirects you to the evaluation. Even if I say that I don't want to participate, they still want me to do the evaluation and write about my experience with the app. Please update the app so that if someone is enjoying it and wants to add something to t…	ar	guy app good ask im enjoy application every time good annoy people moreover leave app open redirect evaluation even say dont want participate still want evaluation write experience app please update app someone enjoy want add something evaluation otherwise best regard	Negative	App Store	1	1	0
App Store	9f58a296-b1ec-465e-8a27-01012d1860f8	Conzeka	10/27/22 1:54	Review				en	sa	alrajhi	It is really easy and convenient to use this app for banking however,today facing a serious challenge trying to send money internationally and the app is asking for Arabic name,it is disappointing and an inconvenience to face challenges like this when the finances are needed most for the family members at home.I hope the issue gets resolved sooner and that we donât have to face the same issue a…	en	really easy convenient use app bank howevertoday face serious challenge try send money internationally app ask arabic nameit disappoint inconvenience face challenge like finance need family members homei hope issue get resolve sooner dont face issue	Neutral	App Store	1	1	0
App Store	562df21d-1858-40b3-8552-838073ac6f77	Ymoallem	1/16/22 6:17	New design with plenty of services				en	sa	alrajhi	Iâve liked the new app with the ability to do plenty of services without visiting the branch physically. One of nice new services is to open a new account which I didnât try yet. One drawback is that the app sometimes hangs and fail to process the requests. This recently is repeating so frequently to the point it is annoying. That is why Iâm not giving full starts.	en	ive like new app ability plenty service without visit branch physically one nice new service open new account didnt try yet one drawback app sometimes hang fail process request recently repeat frequently point annoy im give full start	Positive	App Store	1	1	1
App Store	5b8bb050-f787-4ab3-9310-288a2ce682dc	AlimAgwan	3/15/22 17:43	Account opening and transfer				en	sa	alrajhi	I thought account opening in Arabic speaking bank will be a tough job. But to my surprise, AlRajhi App helped me open account very easily and transfer executed seamlessly . New account opening took 10 minutes only. This is best experience I had with any bank in my last 30 years dealing with various banks. I will recommend AlRajhi App to everyone. Thanks	en	think account open arabic speak bank tough job surprise alrajhi app help open account easily transfer execute seamlessly new account open take minutes best experience bank last years deal various bank recommend alrajhi app everyone thank	Positive	App Store	1	0	0
App Store	23140c59-bc5d-4cab-9e28-ad4fe8456ebc	khaled alzubaidi	9/18/23 5:18	Very bad update to determine which sites should be activated. GPS is mandatory				en	sa	alrajhi	Very bad update to determine which sites should be activated. GPS is mandatory, reactivation software, privacy icon and then location services cannot be opened. This risk for the subcontractor is that the software helps us and does not define us. Why do we specify our location for you as a company when we are customers and are not entitled to specify locations except for a special period of time …	en	bad update determine sit activate gps mandatory reactivation software privacy icon location service open risk subcontractor software help us define us specify location company customers entitle specify locations except special period time foot program remain change another bank government authority determine location company	Negative	App Store	1	1	0
App Store	a6677997-5919-4183-b842-3fc93e8d7b0b	Rudd's X	4/21/22 18:36	Accessibility issues with this version				en	sa	alrajhi	I really like this app but it is very slow with the VoiceOver in this update so when I try to use the VoiceOver with it it takes too much time to load up and also to press on the button also there is a lot of unlabelled buttons so I hope you can fix this issue thanks in advance	en	really like app slow voiceover update try use voiceover take much time load also press button also lot unlabelled button hope fix issue thank advance	Negative	App Store	0	0	1
App Store	871b5e4d-a433-4b36-9e6b-e8d5ae7fb7c1	Al twal	4/28/22 0:07	Tuwal907				en	sa	alrajhi	A very excellent, comfortable, and easy-to-use application for everyone. There's no need to go to the bank or ATMs while you are at your home or store, and from anywhere in the world, you can easily and conveniently complete all your banking transactions at any time.	ar	excellent comfortable easytouse application everyone theres need go bank atms home store anywhere world easily conveniently complete bank transactions time	Positive	App Store	0	0	0
App Store	02b31b40-4c1e-4c78-a0c0-4e9f8e5aedb4	Dost Yar	3/2/22 4:25	Great Step To Future				en	sa	alrajhi	Happy to see these process by Bank, great idea to open your account on fingertips within few minutes. No headache of go through paperwork and waiting in the bank. Worst costumer service by the staff in many branches. I will suggest if possible please fix these issues which we are facing in banks especially for non-Saudi or non-Arab.	en	happy see process bank great idea open account fingertips within minutes headache go paperwork wait bank bad costumer service staff many branch suggest possible please fix issue face bank especially nonsaudi nonarab	Positive	App Store	1	0	1
App Store	29d9181f-c54d-41e9-a314-119b21a65643	samgharge	8/20/22 19:08	Very Bad Service				en	sa	alrajhi	Before you have service was very good but now your service is very very Poor. we cannot add an international beneficiary online through the mobile banking I filed a complain many times but they didnât solve it every time I have to go to bank to add a beneficiary they are forcing me to send money to add International beneficiary and they are charging me On Service fee in the name of transfer fee…	en	service good service poor add international beneficiary online mobile bank file complain many time didnt solve every time go bank add beneficiary force send money add international beneficiary charge service fee name transfer fee sr even im ready pay sr right things nowadays visit alrajhi bank ask send money type work bad service	Negative	App Store	1	1	0
App Store	f609fa72-7dbb-4bc2-afe0-0da3d1eef916	Ahmedz ghgh	9/5/23 15:21	Empty promises and HORRIBLE app				en	sa	alrajhi	I went to 3 different branches to update my info, 2 branches said sure just sign and allâs good. NOPE nothing happened until I visited the third branch and waited through the incoming acquaintances of the employees coming in without taking a number ! SO ETHICAL. Finally i updated my info and applied for a VISA with assurance that 24 hours and itâll be in you app. Well Not a thing happened exc…	en	go different branch update info branch say sure sign alls good nope nothing happen visit third branch wait incoming acquaintances employees come without take number ethical finally update info apply visa assurance hours itll app well thing happen except new update keep log soon log amaze bank innovative approach think terrible user experience	Negative	App Store	1	1	0
App Store	644301ad-8c7b-4ac0-b9ec-7f4afa4f13fe	Mohib Sidiqui	4/28/22 14:13	App hanging after new card				en	sa	alrajhi	I just accepted the new card offer and since than it is not opening and app is always hanging when ever tried to open. If you do not touch the new card than the app is working but as soon you try to open new card the whole app is hanging. Please fix.	en	accept new card offer since open app always hang ever try open touch new card app work soon try open new card whole app hang please fix	Negative	App Store	0	1	1
App Store	d5190044-b423-4391-939f-f668d5e99a18	salamAlaikomAll	2/12/22 22:12	Password				en	sa	alrajhi	Please allow people to have the freedom to choose their own passwords! Do not force them to change it every time they forget! And allow the use of symbols like other banks do. Thank you!	ar	please allow people freedom choose passwords force change every time forget allow use symbols like bank thank	Neutral	App Store	1	1	0
App Store	f5cfba3d-2524-4884-91f1-5a84c3dafe9b	Damukey	6/21/23 2:51	Comments				en	sa	alrajhi	Nice transactions, I hope the 5 times maximum update for id/ iqama will be increased because for us employees under agency expiry of id is every 3 months and before going to the dashboard of alrhaji online you are first directed to updating the iqama so even if I know my iqama not updated yet I need to press update in order for me to go to dashboard and make online bank transactions. Thank you	en	nice transactions hope time maximum update id iqama increase us employees agency expiry id every months go dashboard alrhaji online first direct update iqama even know iqama update yet need press update order go dashboard make online bank transactions thank	Positive	App Store	0	1	0
App Store	6b0c58a4-a75f-4659-84a7-e8ca08c4759a	asif jabed	6/13/23 15:31	Smart phone app				en	sa	alrajhi	In this new update the font size of written method is too low which can nag be seen without eye glasses it should be some bold size or in in there should be a font size measurement which can help those whoâs eye sight is low or weak So hope that it should be adjust in next update Thanks	en	new update font size write method low nag see without eye glass bold size font size measurement help whos eye sight low weak hope adjust next update thank	Neutral	App Store	1	0	0
App Store	c9b15656-eece-444e-8fcb-506cccacfed0	Donia73	4/27/22 14:57	About the app				en	sa	alrajhi	Make life easier! I like that the app design changes related to social events and the functionality of it is smooth and easy. Genuinely the look and feel of the application is so good and the customer services are really outstanding!! Keep up the good work!ðð¼	en	make life easy like app design change relate social events functionality smooth easy genuinely look feel application good customer service really outstanding keep good work	Positive	App Store	0	0	0
App Store	3b460e90-aa0c-41d1-bcda-a1035d83abb5	ska2019	4/1/23 20:03	New application update				en	sa	alrajhi	Dear AlRajhi mobile developers and UX, a message for you, For the new app updates it was very bad and you were not lucky in it. Please review the user experiences and still facing many problems where old version was most stable and very user friendly	en	dear alrajhi mobile developers ux message new app update bad lucky please review user experience still face many problems old version stable user friendly	Negative	App Store	1	0	0
App Store	c602bb51-b91e-49a6-b972-38e1844fe1f7	m dany	2/16/23 14:09	Flawless app				en	sa	alrajhi	All kinds of bank transactions and activities can be done thru the app. It is easy to navigate and the services are sorted properly. I have been using it for nearly 2 years and never had a major technical issue	en	kinds bank transactions activities do thru app easy navigate service sort properly use nearly years never major technical issue	Positive	App Store	0	1	0
App Store	41ccf137-5ede-4850-9681-c664cbe94261	Manal Vivre	5/7/22 3:42	I love it				en	sa	alrajhi	Honestly, their app design is the best. I have switched to using Alrajhi bank as a primary bank just because of how easy and beautiful it is to use their services. Itâs a whole new experience. I love it. Thank you Alrajhi for putting so much effort into satisfying the costumerâs bank experience.	en	honestly app design best switch use alrajhi bank primary bank easy beautiful use service whole new experience love thank alrajhi put much effort satisfy costumers bank experience	Positive	App Store	0	0	0
App Store	c150b2e0-464f-493e-80b6-b0e84904041a	spiderman201321	4/28/22 0:03	Very bad				en	sa	alrajhi	Stupid unnecessary update.. there were no problems with the old version and now it is full of problems, very slow and frustrating.. It is change to the worse unfortunately.	en	stupid unnecessary update problems old version full problems slow frustrate change bad unfortunately	Negative	App Store	1	1	1
App Store	87e79132-fca7-4901-8792-2cb26aa6d803	Saleem1988	9/4/23 10:07	Missing future				en	sa	alrajhi	All Good But I don't understand why you have removed the quick International Transfer option This was a good thing as we could easily transfer the amount from any of our ATM cards And it was very easy	en	good dont understand remove quick international transfer option good thing could easily transfer amount atm card easy	Negative	App Store	1	1	0
App Store	63e5d0a0-07e2-442c-b413-bc5c695000aa	zumaie	4/24/22 8:50	Eng				en	sa	alrajhi	The main page in the pervious version is much better, the new feature are excellent but it can be accommodated within the previous easy straight forward page with little cosmetic	en	main page pervious version much good new feature excellent accommodate within previous easy straight forward page little cosmetic	Positive	App Store	1	0	0
App Store	6263a0ca-707b-4f2b-9977-7f5cfc835e3c	drabukhalid07	3/27/22 20:45	One of the best banking apps				en	sa	alrajhi	I used to do my banking transactions through mobile apps. I found the Alrajhi bank application is one of the best because it is very friendly for the users and authentications required is also very friendly.	en	use bank transactions mobile apps find alrajhi bank application one best friendly users authentications require also friendly	Positive	App Store	0	0	0
App Store	79dc436e-ce8b-41dc-aaab-5b14abfafc35	Solomon Smith	11/27/22 8:08	Excellent Experience				en	sa	alrajhi	I would like to express my gratitude and true appreciations to Alrajhi Bank entire team for the exceptional service that I had and still having over the past twenty eight years since I started as a customer	en	would like express gratitude true appreciations alrajhi bank entire team exceptional service still past twenty eight years since start customer	Positive	App Store	0	0	0
App Store	013561e0-ff1e-4b88-abe6-91037b5698c9	App not working properly MHA	8/20/23 17:02	The app is not working properly.				en	sa	alrajhi	The app is not working properly. I sent complaint regarding credit card not showing in the app but nothing has been done. I tried to uninstall and reinstall but still the same. And there is no problem in my phone because I tried to open it also in the laptop and showing the same, it says that I donât have credit card. Please fix your app. Very bad service.	en	app work properly send complaint regard credit card show app nothing do try uninstall reinstall still problem phone try open also laptop show say dont credit card please fix app bad service	Negative	App Store	1	1	0
App Store	1a524226-8546-41d7-8727-bea94a3dd4d9	*yagie*	4/27/22 4:34	Hassle free				en	sa	alrajhi	Thank you Alrahji mobile for the no hassle transaction, a convinient and hassle free transaction anywhere. It definitely save my time and effort. Very much recommended to enjoy life in this time of Pandemic. Thank you for being there Alrajhi mobile!	en	thank alrahji mobile hassle transaction convinient hassle free transaction anywhere definitely save time effort much recommend enjoy life time pandemic thank alrajhi mobile	Positive	App Store	0	0	0
App Store	1453b81d-e17c-4204-a611-a795afeafe66	zainabo04	3/26/22 17:01	User friendly				en	sa	alrajhi	Iâm very impressed with this application design.. the user journey is as easy as it can be, the navigation menus are clear and quick to access, u can perform ur actions fast, no crashes. Best mobile banking application among competitors.	en	im impress application design user journey easy navigation menus clear quick access u perform ur action fast crash best mobile bank application among competitors	Positive	App Store	1	1	0
App Store	7b980b3c-1236-4a50-902f-ba435ded2dbb	Walid abuOmar	3/19/22 14:15	Best online banking experience				en	sa	alrajhi	This is an app that can drive your decision to change your current bank and switch to AlRajhi. Super user friendly. And adding services like trading Gold is genius ! Strongly recommend	en	app drive decision change current bank switch alrajhi super user friendly add service like trade gold genius strongly recommend	Positive	App Store	0	0	0
App Store	368a57b9-6fb8-4fbf-ba68-f77620748502	Fahadf2f90	5/19/23 23:56	Extraordinary				en	sa	alrajhi	This new version provide extraordinary experience. Dealing with bank services becomes easier and within few clicks. However, it needs some modifications in the spending infographics.	en	new version provide extraordinary experience deal bank service become easy within click however need modifications spend infographics	Positive	App Store	1	0	0
App Store	cf62768e-9eca-40f8-9021-2b84dc6676aa	ع. س	2/18/22 23:08	Transaction report				en	sa	alrajhi	One I want to transfer a money for some one I got a PDF report which is great and one you leave the app and want to get it again or other PDF transaction you canât find it	en	one want transfer money one get pdf report great one leave app want get pdf transaction cant find	Positive	App Store	0	1	0
App Store	e341d5a3-c2e6-4cc6-977b-04c101e237f3	preciousbanjao	8/11/22 9:41	Not reliable				en	sa	alrajhi	My hard earned money is on hold. If u call the customer service they will say go to the branch. In the branch they dont know what happen and say they will send email and wait. And even ask you maybe you order online. OMG! And this is the funny thing. Before i know that they hold my money i was in panic because my 2000 in my account is missing and what left for me is 13 riyals. AND THEY ASK ME WHE…	en	hard earn money hold u call customer service say go branch branch dont know happen say send email wait even ask maybe order online omg funny thing know hold money panic account miss leave riyals ask ur money go answer thats branch know say statement account save many months get statement account remain balance riyals need pay riyals record inside branch	Negative	App Store	0	1	0
App Store	42e1b93c-c917-4084-a2c9-f0be2ac6d023	Nwaf ali	2/20/22 3:55	Good, but can be better				en	sa	alrajhi	The display is good and the app is very smooth, I just wish if I could book appointments through it too and if I can find where is the nearest self service machine is.	en	display good app smooth wish could book appointments find near self service machine	Positive	App Store	0	0	0
App Store	25768e1b-d255-4648-9f4c-efcaee7cd1e6	Hamed Alqazaz	4/27/22 7:54	Bank from the future				en	sa	alrajhi	Thx for your efforts for making our life easier I think last update is more confusing it needs to be more simpler	en	thx efforts make life easy think last update confuse need simple	Neutral	App Store	1	0	0
App Store	7735756c-b71c-4417-8580-c63ffb4f5266	Dr. Haseeb	1/29/22 9:12	Nice and user friendly (English)				en	sa	alrajhi	Convenient and quick to access options with user friendly interface	en	convenient quick access options user friendly interface	Positive	App Store	0	0	0
App Store	410718aa-6663-4387-8d17-80c8815f5b22	7amoudy	6/3/23 14:14	5 Stars services				en	sa	alrajhi	Best banking services and Application for an easy access to all your financial requirements with very satisfying offers for purchases and a wide variety of electronic cards ð³ Great bank with great team to support youðð¼	en	best bank service application easy access financial requirements satisfy offer purchase wide variety electronic card great bank great team support	Positive	App Store	0	0	0
App Store	642da70f-8318-433b-b025-671866aef59f	RD Dar	4/20/22 12:28	Alhamdulilah excellent service				en	sa	alrajhi	The best and easiest way to send money around the world But when we send money abroad, it would be nice if the currency rate we got with this receipt was also on top of this receipt.	en	best easy way send money around world send money abroad would nice currency rate get receipt also top receipt	Positive	App Store	0	0	0
App Store	4f3a770d-77c7-4a6b-9a06-a38abb821c4e	Ibrar Ahmad Khan	10/27/22 15:18	Not working properly				en	sa	alrajhi	I do not know why but this app does not work properly in my phones, got iphone 7 plus and iphone 13 pro max. It always stuck when i go to cards category and tap on Digital card and sometimes in Markets menu when to top up or recharge. Kindly fix it.	en	know app work properly phone get iphone plus iphone pro max always stick go card category tap digital card sometimes market menu top recharge kindly fix	Negative	App Store	0	1	1
App Store	caae7106-3cd4-4ef3-94eb-37f5d42afe72	NOMAY ABD	9/2/22 8:39	Ease of use of fund transfer to another previously beneficiary Rajhi bank acct				en	sa	alrajhi	It went smooth Because I already have the beneficiary registered It took less than ONE MINUTES BUT Original internet acct didnât work And, I had to use Mobileonline App Kindly, fix internet site of SNB	en	go smooth already beneficiary register take less one minutes original internet acct didnt work use mobileonline app kindly fix internet site snb	Neutral	App Store	0	1	1
App Store	af71b503-1e2b-4f5e-a93b-5a01144d9c94	Rashid Arab	2/17/22 17:47	Ecellent service				en	sa	alrajhi	Excellent services, helping in many ways even when you forget some info, giving many option for recovery	en	excellent service help many ways even forget info give many option recovery	Positive	App Store	1	1	0
App Store	72260b14-4663-46b7-8446-721964e97c20	Rafeq Momand	8/2/23 13:08	No example in the world				en	sa	alrajhi	I have used many bank account in my life bank al rajhi service like you will not find anywhere in the world good customer service thank you bank al rajhi	en	use many bank account life bank al rajhi service like find anywhere world good customer service thank bank al rajhi	Positive	App Store	0	0	0
App Store	cba950b3-61e3-4990-ac80-69f491354a8d	Nasser Qas	4/26/22 22:01	Best Banking Application				en	sa	alrajhi	I tried online banking in South Korea 3 banks and in Saudi Arabia 4 banks. Alrajhi Online is the best among all of them: 1- Easy to use, 2- Comprehensive functions (all-in-one), 3- Security system does not interfere with ease of use; and 4- The application design is interactive.	en	try online bank south korea bank saudi arabia bank alrajhi online best among easy use comprehensive function allinone security system interfere ease use application design interactive	Positive	App Store	1	0	0
App Store	88db71f8-bc00-4770-8e43-5d758d20ddd5	Abu Ruaa	3/16/22 17:36	Perfect افضل مصرف الكتروني				en	sa	alrajhi	The application is perfect and flexible..thank you all for this effort Alrajhi App and Web services conceder one of the best e-services on KSA ..thank for your efforts to make banking easy and fast for us Even my opinion is written by this perfect bank ð	en	application perfect flexiblethank effort alrajhi app web service conceder one best eservices ksa thank efforts make bank easy fast us even opinion write perfect bank	Positive	App Store	0	0	0
App Store	c74a09fb-e94a-4800-9211-b1556d068d36	Walaeldin	8/30/22 14:20	An exceptional e banking experience				en	sa	alrajhi	No words can express how wonderful this New Alrajhi Bank App is. Friendly use design, Clear icons, easy signing in and all bank services are just under your thumb.	en	word express wonderful new alrajhi bank app friendly use design clear icons easy sign bank service thumb	Positive	App Store	0	0	0
App Store	c717c286-79bc-4ca2-b673-86adb9955ac1	Sajib Ibne Rustam	6/22/23 14:09	Plz Help Me				en	sa	alrajhi	I face To much problem when I am trying to opening a new account . Problem no **1 : when I am give my 1st number he said this sim is not registered by you Iâd ***2 : when I am give my second number he said congratulations you have an account already *****3 : when I give my 3rd number he said you NAFATH error ð¤¦ð» ****4: try next with same SIM card he said you SIM card is not registered by y…	en	face much problem try open new account problem give st number say sim register id give second number say congratulations account already give rd number say nafath error try next sim card say sim card register id	Negative	App Store	0	1	0
App Store	b0212889-21ab-442c-92ff-cb60962ef396	@234sdff	3/30/22 9:41	International transfer service				en	sa	alrajhi	Very bad international transfer service. Not practical to go to the bank every time I want to transfer money outside KSA, this issue should be fixed.	en	bad international transfer service practical go bank every time want transfer money outside ksa issue fix	Negative	App Store	1	1	0
App Store	49aaefc8-ea95-48b7-91d7-97d3d2850804	Nadit18	5/9/22 10:49	Convenient and quick				en	sa	alrajhi	Very convenient and quick! No hassle in sending money back to family in the Philippines.	en	convenient quick hassle send money back family philippines	Positive	App Store	0	0	0
App Store	7ce07f39-a614-409c-9c51-9ef510763ef1	Syed naya	3/20/23 12:55	Update personal information in Arabic				en	sa	alrajhi	Why bank application say please provide personal information in Arabic only when I put my name their it gives back error message. Can you please assist about the error	en	bank application say please provide personal information arabic put name give back error message please assist error	Negative	App Store	0	1	0
App Store	4cd4bc4d-4395-48f4-ac03-26973e2bc03f	Al Jazee	2/15/22 16:47	Great service				en	sa	alrajhi	Hello dear Alrajhi Bank, I would like to express my gratitude to you for the amazing service you are providing through your application. It saves time and it makes daily purchase an easy task. Thank you, Your loyal client Al Jazee	en	hello dear alrajhi bank would like express gratitude amaze service provide application save time make daily purchase easy task thank loyal client al jazee	Positive	App Store	0	0	0
App Store	26b232b4-0b24-4f78-8196-4a60f5e7ca96	faisal.kk	4/12/22 7:49	Best UI				en	sa	alrajhi	compared to other local ksa banks, alrajhi bank application provides the most convenient user interface. Thanks for taking the time and effort to greatly develop your application !	en	compare local ksa bank alrajhi bank application provide convenient user interface thank take time effort greatly develop application	Positive	App Store	0	0	1
App Store	3c70a21e-2bd7-4da8-8eec-f9d631ce64b9	Kitkatph	1/11/23 14:19	My money transfer was not recieve				en	sa	alrajhi	I send money way back december if Iâm not mistaken and until now it was not received in my bank internationally and it wasnât returned either the bank teller from alrajhi in our hospital tells me everyday that he is following it up to no avail I donât know where my money is the bank representative says itâs frozen and not to worry and itâs been a month since then	en	send money way back december im mistake receive bank internationally wasnt return either bank teller alrajhi hospital tell everyday follow avail dont know money bank representative say freeze worry month since	Negative	App Store	1	1	1
App Store	3a64dafc-7dc6-46d4-a15d-2b669aece347	Alshrari	3/17/22 16:51	Following what Users’ Needs				en	sa	alrajhi	Excellent banking app with features that focused on user experience and user usability. I like the periodically upgrades and updates to meet our needs.	en	excellent bank app feature focus user experience user usability like periodically upgrade update meet need	Positive	App Store	0	0	0
App Store	fcd92765-5385-4259-94a9-ba4e1d2bdc82	Ahmadmqq	3/13/22 12:50	The best bank in Saudi Arabia.				en	sa	alrajhi	More than 10 years since I started using its service. I have used it to transfer money abroad when I was studying in the UK. I think it is the most smooth and trusted bank in Saudi Arabia.	en	years since start use service use transfer money abroad study uk think smooth trust bank saudi arabia	Positive	App Store	0	1	0
App Store	1f4c5567-da02-4b47-aaf6-4077fc8401fc	sara .talal	3/7/23 19:44	Easy to use				en	sa	alrajhi	Iâm satisfied with Alrajhi app because its easy to use and explore , their customer service are excellent and everything is easy and online	en	im satisfy alrajhi app easy use explore customer service excellent everything easy online	Positive	App Store	0	0	0
App Store	f4a1edfd-cf4f-4e68-9e00-5ef7cde8fc41	Zahrah Kazim	9/2/23 13:16	Crashing and unusable				en	sa	alrajhi	I installed the app and managed to open an account quite easily. BUT now it keeps crashing every time I login which renders it useless to me!! Tried to reinstall the app with no luck. My iPhone is on the latest update as well so Iâm not sure whatâs wrong.. I would not trust a bank with my money if itâs management would not invest well in making a proper application that works.	en	instal app manage open account quite easily keep crash every time login render useless try reinstall app luck iphone late update well im sure whats wrong would trust bank money management would invest well make proper application work	Negative	App Store	0	1	0
App Store	54fbf1ab-cefc-46d2-bbde-0c23f8a84075	lonzi21	11/3/22 5:19	Convinient				en	sa	alrajhi	I have been using the app for more than 2 years now and it has been updated several times but so far itâs functioning good until now. No complaints from me. I recommend the App!	en	use app years update several time far function good complaints recommend app	Positive	App Store	1	0	0
App Store	1ba71a56-6c80-4524-8308-26188f7e2c70	faizbinmahfooz	8/2/22 9:01	International Beneficiary add invalid				en	sa	alrajhi	I am from india but living in ksa I want to add international beneficiary of indian bank (BANK OF BARODA ) all are enter correctly but when i enter an account number then it says your account number is invalid (enter 11 digit number) but my bank number is 14 digit plz fix this issue	en	india live ksa want add international beneficiary indian bank bank baroda enter correctly enter account number say account number invalid enter digit number bank number digit plz fix issue	Neutral	App Store	0	1	0
App Store	e47319ad-a832-4978-a6d2-a3be0de03c1e	bulhen03	9/28/22 6:17	Bad update				en	sa	alrajhi	Ive been using this app for 5 yrs and The new update of the app is very bad. It limits the number of transaction like transfer per day. There are a lot of error that i dont understand how.	en	ive use app yrs new update app bad limit number transaction like transfer per day lot error dont understand	Negative	App Store	1	1	0
App Store	a7495b9e-d4af-4ead-a51d-5e16ea3f222e	Asghar7	6/8/23 12:53	Incorrect Balance				en	sa	alrajhi	The current balance is not updated when you do a transaction. You have to log out and login again to see the correct balance.	en	current balance update transaction log login see correct balance	Neutral	App Store	0	1	0
App Store	074067d1-88f6-4140-ab82-f59fa6b970fe	Innocent raja khan	4/3/22 21:52	Option to cancel transaction				en	sa	alrajhi	There is should be option to cancel the transaction. If you transfer the money and you want to cancel it thereâs should be a option of cancellation..!	en	option cancel transaction transfer money want cancel theres option cancellation	Neutral	App Store	0	1	0
App Store	912cb7c6-0944-425a-a692-c40ccd80729c	Abu-Faisal2489	5/24/23 9:22	Safe application				en	sa	alrajhi	I highly recommend this bank to deal with because of high security system they are using.	en	highly recommend bank deal high security system use	Positive	App Store	1	0	0
App Store	ab1ae26a-ce27-46d4-abb8-30292fa77b0c	AbuFahad_SAS	3/15/22 8:57	Excellent and quick service				en	sa	alrajhi	Make bank services easier and can do all in your mobile	en	make bank service easy mobile	Positive	App Store	0	0	0
App Store	b84c46fb-3567-46a7-9afc-0db0b4f7e73b	misgersam	2/15/22 10:55	One of the best banking apps				en	sa	alrajhi	Seemlessly working, but when applying for credit card through this app it is giving an error please check	en	seemlessly work apply credit card app give error please check	Negative	App Store	0	1	0
App Store	3376eaed-1455-489c-9f31-934a815b1d39	wafaabd	7/10/23 18:45	Hackers				en	sa	alrajhi	ð¥º Thanks a lot full of appreciation hopefully this quick service never give chances for hackers to inter my account. This is what it makes any customer worry about it	en	thank lot full appreciation hopefully quick service never give chance hackers inter account make customer worry	Positive	App Store	1	0	0
App Store	62050ae3-464c-48ad-ab70-3beb93b03a83	eathya	6/8/23 23:23	Thanking the team				en	sa	alrajhi	Thank you so much for making itâs is easy and safe Allhumdullia May Allah bless you all Ameen. & please if u can reduce the transfer fix of international transfer it will be very good for all of as.	en	thank much make easy safe allhumdullia may allah bless ameen please u reduce transfer fix international transfer good	Positive	App Store	1	0	0
App Store	09fca2f1-ce49-4d64-9512-c0dc53b584df	Mrkjmz14	2/20/22 0:13	AlRahji Bank				en	sa	alrajhi	Very good and safe bankin experience I also like the international transfer feature which makes it easier for me to send money overseas to my family ðð»ðð»ðð»	en	good safe bankin experience also like international transfer feature make easy send money overseas family	Positive	App Store	0	0	0
App Store	3d32cc1b-934b-4df3-8f0e-d62a948e141a	he ysushhds on kidijdjjdidj	3/5/23 8:30	Very very bad bank				en	sa	alrajhi	They closed my bank account number now i am visiting from 3 months and they say server is not working. Worst bank i have seen in my life Even application said we have technical problem . I will take my all money from this bank and never never never put my money to this bank again please donât open in this bank any bank account..	en	close bank account number visit months say server work bad bank see life even application say technical problem take money bank never never never put money bank please dont open bank bank account	Negative	App Store	1	1	0
App Store	cc2d486f-736e-4f76-827c-10f717ea9ee3	Jamshid ali	1/24/22 19:07	Appreciation				en	sa	alrajhi	I would like to thanks to Alrajhi banking system . I just download the new app of Alrajhi mobile feel easy to use and matching with international standers. Thank u Alrajhi. Thank u Saudi Arabia the secure country in the world (may u live long)	en	would like thank alrajhi bank system download new app alrajhi mobile feel easy use match international standers thank u alrajhi thank u saudi arabia secure country world may u live long	Positive	App Store	0	0	0
App Store	8e77e0d4-aa79-489b-942d-1fd499f8f750	sakura918	4/15/22 5:43	Cannot log in				en	sa	alrajhi	After the update of the app now i cannot use the mobile app to log in to my account	en	update app use mobile app log account	Negative	App Store	0	1	0
App Store	3ddb5b33-fa23-4d5e-b682-bf216bfefe0d	nouraD	5/19/22 9:20	Not fully functional				en	sa	alrajhi	When i downloaded the app i was hoping id never have to visit the branch unless they need me for some matters that regulations require the user to be physically present/face to face. Wasnt the case. Ordered a card. its beenâunder reviewâ for 3 months now. Will have to go to branch unfortunately for some basic banking needs.	en	download app hop id never visit branch unless need matter regulations require user physically presentface face wasnt case order card beenunder review months go branch unfortunately basic bank need	Negative	App Store	1	1	0
App Store	49db1da8-21fe-49eb-bbd8-1f8d394976ba	Osama Mekhaeel	3/26/22 13:39	Wonderful service				en	sa	alrajhi	Itâs a great service with all functions you may need specially now you are able to add international benificary using the application without visiting the branch	en	great service function may need specially able add international benificary use application without visit branch	Positive	App Store	1	1	0
App Store	6840b848-f3ab-4769-9a49-1d6d3ac2821e	Mohammed ghosain	1/20/22 6:11	Feedback				en	sa	alrajhi	This quick method is really the best . No other banks have this. I am enjoying this a lot. It saves time . Thanks for your efforts to be distinguished over others.	en	quick method really best bank enjoy lot save time thank efforts distinguish others	Positive	App Store	0	0	0
App Store	e94520cf-b0be-4540-8270-371bec2f34ac	Jaw22-122	12/3/22 14:53	Easy to use				en	sa	alrajhi	This banking app is the best so far compared to the others, easy to use provided with great service, I like the marketing part.	en	bank app best far compare others easy use provide great service like market part	Positive	App Store	0	0	0
App Store	e87ce936-f2b2-4c84-8abd-f25456003e29	bakri yaslam	4/24/22 18:16	My opinion about the application				en	sa	alrajhi	I think The application is great even before the last update but now itâs remarkable. Adding the shop was a brilliant idea.	en	think application great even last update remarkable add shop brilliant idea	Positive	App Store	1	0	0
App Store	9e0ec9a3-a74b-4d61-b210-3c728e9086c3	Eng_A7mdd	3/27/22 10:49	Well updated				en	sa	alrajhi	Was and still very helpful and easy to use with almost full functions	en	still helpful easy use almost full function	Positive	App Store	0	0	0
App Store	35b14dc2-b0b4-439b-a1b2-f0384b23507e	A F Al shammary	3/12/22 17:57	Thank you				en	sa	alrajhi	Thank you for your electronic service it is really making the customer live very easy Thank you again	en	thank electronic service really make customer live easy thank	Positive	App Store	0	0	0
App Store	dc3d8c35-580c-4f16-8d2a-863572a6a8d0	FatimaFareed1	3/1/22 9:39	Thank you for your facilities				en	sa	alrajhi	Every thing can be done from home or at your place , I really appreciate your hard work.	en	every thing do home place really appreciate hard work	Positive	App Store	1	0	0
App Store	cc0c7afb-def7-4d7a-b613-9313f4ff335a	Alaa Mari	2/24/22 8:22	Best Saudi Bank app				en	sa	alrajhi	The best application among many that I have tried. Up-to-date, Fast and reliable. I really liked the notifications page. Please keep improving.	en	best application among many try uptodate fast reliable really like notifications page please keep improve	Positive	App Store	0	0	0
App Store	ebcdda57-25b2-486f-aa7b-067e6b6ac5ec	Braveheartnurse	5/3/22 23:35					en	sa	alrajhi	Thank you for making our banking experiences easy specially this time of pandemic...may you continue to inprove your service more...	en	thank make bank experience easy specially time pandemicmay continue inprove service	Positive	App Store	1	0	0
App Store	fa7441e7-aa37-4c66-8814-3745e2fe815d	superrrSaaaddd	4/28/22 18:31	AAmazing banking Digital Experience				en	sa	alrajhi	Al Rajhi has all in one place in mobile banking app. One could expect nothing more than this. Huge digitalisation. Just in click transfers are done.	en	al rajhi one place mobile bank app one could expect nothing huge digitalisation click transfer do	Neutral	App Store	0	0	0
App Store	88c05d53-b294-4455-99b6-0d2c151068b3	MeAmerme	4/26/22 10:06	Better than some others				en	sa	alrajhi	Better than the other 4 banksâ applications I've used	en	good bank applications ive use	Positive	App Store	0	0	0
App Store	bfb3e22f-02b6-45c1-8762-6c3469272124	Abdulrahman Baali	2/22/22 13:35	Better change				en	sa	alrajhi	Itâs been way much easier than the previous app. Keep the good work up.	en	way much easy previous app keep good work	Positive	App Store	1	0	0
App Store	1f617e51-b9cb-4554-83b9-b20bc0c53f8f	Hanook Nazar	9/16/23 10:01	Alrajhi no 1				en	sa	alrajhi	Best service. Easy to access and procedure. Every detail available. Adding beneficiary easy. Transfer money in seconds. Very nice and quick service.	en	best service easy access procedure every detail available add beneficiary easy transfer money second nice quick service	Positive	App Store	0	0	0
App Store	b0758079-d4a7-44e4-977b-1a83c4b51cce	Muhajri	6/20/23 9:30	Liked the old version				en	sa	alrajhi	still the best bank nowadays though . Way better than the green one	en	still best bank nowadays though way good green one	Positive	App Store	0	0	0
App Store	c281698c-32f5-47dd-95e6-820ae5aade42	فاعل خير بدون اسم	4/9/22 17:36	Comments				en	sa	alrajhi	Good and bad Easy use however the previous one had more features	en	good bad easy use however previous one feature	Positive	App Store	1	0	0
App Store	7e9dd88f-59ec-4025-a3f0-83a8c756d24e	Ambulance101	4/28/22 1:32	Highly recommended app!				en	sa	alrajhi	So easy to use and navigate all the time,keeping updated as it goes even in pandemic time!	en	easy use navigate timekeeping update go even pandemic time	Positive	App Store	1	0	0
App Store	8297f2ef-0eee-458c-b59e-4ae42ec08169	Manar Misha	3/12/22 7:53	Great experience				en	sa	alrajhi	The most smooth easy to use Bank App .. itâs really the best out there .. I appreciate the great care about us as client in our online experience	en	smooth easy use bank app really best appreciate great care us client online experience	Positive	App Store	0	0	0
App Store	ff654653-3865-4430-9597-fa8a355feaff	mohsen hamad	9/18/23 10:04	Easy to use				en	sa	alrajhi	Very easy to use itâs just one click to do whatever you need for your business	en	easy use one click whatever need business	Positive	App Store	0	0	0
App Store	ac1ede0d-fb6e-40b8-a4dc-9420b33d15dd	A-ALFAIROUZ	5/26/23 11:31	Impressive as always				en	sa	alrajhi	Amazing app. Canât be beaten. I would love to see more customization options in the future updates.	en	amaze app cant beat would love see customization options future update	Positive	App Store	0	1	0
App Store	a2c82053-aa7e-4149-a656-0eee7169842c	i3z901	5/19/23 15:58	Essential, Easy, Safe.				en	sa	alrajhi	The experience I had with this app is phenomenal. It's easy to use at any age from 18 and above. It's safe with Face recognition ( I use iPhone 14 pro max ) and password management.	en	experience app phenomenal easy use age safe face recognition use iphone pro max password management	Positive	App Store	0	0	0
App Store	235136a7-e5bf-44da-a92d-ff1d1dfd3e2b	latiefmadinah	5/17/23 7:56	Application not open in menu				en	sa	alrajhi	Please i can't open to the menu because it was unconfirm use apple wallet pleaese fixed the bug	en	please cant open menu unconfirm use apple wallet pleaese fix bug	Negative	App Store	0	1	0
App Store	cb486c94-4376-4467-944f-da19a57a866e	J . Subzwari	5/23/22 4:29	Currency converter is missing				en	sa	alrajhi	All is well BUT missing the currency converter which was a great help in terms of knowing the real time exchange rate . Hope-take get it back	en	well miss currency converter great help term know real time exchange rate hopetake get back	Neutral	App Store	1	1	0
App Store	e85b6194-f3bd-49a7-a172-f41a63f4326b	Ahmad Khafaji	5/21/22 3:36	Excellent App				en	sa	alrajhi	Got nothing more to say! Excellent Please do not ask me to rank your app again itâs very annoying and ruin the whole app experience	en	get nothing say excellent please ask rank app annoy ruin whole app experience	Negative	App Store	1	0	0
App Store	9b9e0405-a03f-4488-8351-2f66fd95fcb9	70554M	3/17/22 16:53	Efficient and user friendly				en	sa	alrajhi	Great improvement over the old version.	en	great improvement old version	Positive	App Store	1	0	0
App Store	2c2a22b2-fe76-4c6a-b336-013802ad1c21	رائد الدهمشي	2/14/22 19:03	One of the best bank apps				en	sa	alrajhi	Fast and easy to use also stable softwareðð¼ the include every thing that you need to do at the bankðð¼ðð¼	en	fast easy use also stable software include every thing need bank	Positive	App Store	0	0	0
App Store	07a4b70e-7470-4301-8522-0d7a12dce85e	Capricon36	4/27/22 23:49	Unable to open application				en	sa	alrajhi	Continuously loading	en	continuously load	Neutral	App Store	0	1	0
App Store	c5484d57-c987-4423-8a12-9180fe0abd07	gagamvino	7/23/23 3:52	International remittance				en	sa	alrajhi	Only local transfer is faster but international my account not transfer to other country due to update to arabic translation but didnât work after my translate to my full name information pls fix this issue thank you al rajhi	en	local transfer fast international account transfer country due update arabic translation didnt work translate full name information pls fix issue thank al rajhi	Negative	App Store	0	1	0
App Store	92cfe63a-d7e0-4ec7-a259-73f4ab8b5d02	shyookham	4/27/22 8:05	The best banking service				en	sa	alrajhi	From my experience with many banks , I can say this bank provides an excellent service to its customers	en	experience many bank say bank provide excellent service customers	Positive	App Store	0	0	0
App Store	2fa48323-c532-4096-9cd4-ecdcad6c993d	Salanta7	4/25/22 16:27	Names				en	sa	alrajhi	Good but names when transfer not organized alphabetically I really like it Please arrange the names according to the most used ones appear first or alphabetically ð¹	en	good name transfer organize alphabetically really like please arrange name accord use ones appear first alphabetically	Positive	App Store	1	1	0
App Store	673abdd7-f3fc-42fa-be58-d04af1df0dae	Ahtisham Gorach	4/5/22 18:04	Ahtisham Gorach				en	sa	alrajhi	Very nice application. Have all the banking services. The new version is user friendly and provide better and quick services.	en	nice application bank service new version user friendly provide good quick service	Positive	App Store	0	0	0
App Store	94f8b93a-dbb9-4f53-8b8b-ec10d33dcf09	waleed elantary	4/3/22 17:24	Simple and multi option application				en	sa	alrajhi	Really itâs amazing application while you can do any thing with very simple way	en	really amaze application thing simple way	Positive	App Store	1	0	0
App Store	c1e9aa4d-860f-43ad-b252-1ef6956be6a0	makasem	4/27/22 11:32	Fantastic experiment				en	sa	alrajhi	Realy itâs the best experience i had throughout all bank apps i ever use. its easy , fast and i feel security with my all operations.	en	realy best experience throughout bank apps ever use easy fast feel security operations	Positive	App Store	0	0	0
App Store	f56a3105-05bc-4884-b7ca-ec3c7e4d1eee	Golden Broast	9/5/23 21:18	App not working				en	sa	alrajhi	My App is not working well as it open for one second and pop out to Home Screen immediately Not even one thing is touching	en	app work well open one second pop home screen immediately even one thing touch	Negative	App Store	0	1	0
App Store	c2fe8fc9-00fb-45aa-a51a-d18bca06e5e4	Eng. MT	5/15/23 0:29	Performance				en	sa	alrajhi	In my opinion l, the transaction execution performance in the old version of Mubasher is much better than this version. It takes time to download the page. They have to focus in the transaction performance.	en	opinion l transaction execution performance old version mubasher much good version take time download page focus transaction performance	Positive	App Store	1	0	1
App Store	d025aa3c-4de9-401b-9093-e00a24acb854	AbuAleen	4/26/22 15:26	Great App for Great Users				en	sa	alrajhi	Beast bank app ever. I have tried many bank apps, nothing beat this one or comes even closer. Thank you Rajhi management for everything ð	en	beast bank app ever try many bank apps nothing beat one come even close thank rajhi management everything	Positive	App Store	0	0	0
App Store	b1066cc1-afbb-484a-92b9-398ed19be9c6	Ha210015	4/25/22 7:01	Self service machine issues				en	sa	alrajhi	I have expired ATM card two weeks now canât print from self service machine I try three machines	en	expire atm card two weeks cant print self service machine try three machine	Negative	App Store	0	1	0
App Store	38ae7de4-d34d-4c5b-bcee-dcfae7a8ae93	jatt kassar	4/10/22 21:28	Mobile banking services				en	sa	alrajhi	Friendly to use , quick response for otp	en	friendly use quick response otp	Neutral	App Store	0	0	0
App Store	1e2312e4-32bf-415c-88da-0c13dda70509	dr.alhumaidi	3/29/22 17:30	Transfer money not working				en	sa	alrajhi	Transfer money not working It was better before know not	en	transfer money work good know	Negative	App Store	0	1	0
App Store	bf41bda7-0030-453d-b8e8-b24025a4a767	Ahmad Bakhsh	2/2/22 21:37	Wonderful Bank App				en	sa	alrajhi	Thank you AlRajhi Bank for making this wonderful app for our daily transactions with very simple, straightforward , & self-explainatory app. Great job & many thanks. Ahmad	en	thank alrajhi bank make wonderful app daily transactions simple straightforward selfexplainatory app great job many thank ahmad	Positive	App Store	0	0	0
App Store	16d71321-0f0c-4f27-913a-cc0453c9d50d	Omar.Hussain	1/28/22 10:26	Much easier				en	sa	alrajhi	Finally an app better than web	en	finally app good web	Positive	App Store	0	0	0
App Store	bf8b4f93-1459-4294-9a6d-3b4107f8127f	RTR997	2/26/23 3:08	App evaluation				en	sa	alrajhi	Big improvement I will recommend this to the others	en	big improvement recommend others	Positive	App Store	1	0	0
App Store	20af6fd1-87a0-4dde-b670-1af030bcb5f4	Great but enjoy it	5/16/22 5:22	Very nice and good app				en	sa	alrajhi	Itâs very nice and good app quit fast and quick also, better than making transactions on desktop	en	nice good app quit fast quick also good make transactions desktop	Positive	App Store	0	0	0
App Store	f2da6f10-2526-42cf-b49e-e247061abb99	Lisamaccraken	5/6/22 12:14	Convenient, Easy, Safe				en	sa	alrajhi	Application is great tool for all banking activities, can easily pay my bills, transfer money with nominal charges ... excellent	en	application great tool bank activities easily pay bill transfer money nominal charge excellent	Positive	App Store	0	1	0
App Store	b638e3c3-54e4-4ba2-b02f-71dfc8ab10d5	Akber Jivani	4/30/22 16:31	Akber Jivani				en	sa	alrajhi	Wonderful and World Class experience. Great easy doing with one click. Happy Life ð Thanks to Al Rajhi Bank and Team!. Also be started cash back benefit to show great customer satisfaction!	en	wonderful world class experience great easy one click happy life thank al rajhi bank team also start cash back benefit show great customer satisfaction	Positive	App Store	0	0	0
App Store	bf3a0ce2-cbdd-402b-9fff-69b845221f02	CITIZEN1894	4/28/22 21:52	Great banking experience				en	sa	alrajhi	I have been using this app for approximately 4 years and itâs really a big time saver. I highly recommend it.	en	use app approximately years really big time saver highly recommend	Positive	App Store	0	0	0
App Store	5f45a000-4557-4ac9-9dcb-58a9223bc170	abdul rahmn abdullah	4/9/22 20:09	Never been better than this				en	sa	alrajhi	Better faster and easier	en	good fast easy	Positive	App Store	0	0	0
App Store	13f61ba4-1c49-477f-ad9e-2eb6685640c2	محمد السيد محمد البدوي	3/17/22 4:42	Perfect Service ever				en	sa	alrajhi	You make my life so easy , Thank you so much , no need to visit anywhere to transfer cash to country! Thank you so much .	en	make life easy thank much need visit anywhere transfer cash country thank much	Positive	App Store	0	0	0
App Store	8aff60f7-c666-409b-afa1-05fe63a9e606	Omar21shuraim	3/15/22 22:08	Great				en	sa	alrajhi	They should change the password policy, so we are able to set a complicated password	en	change password policy able set complicate password	Neutral	App Store	1	1	0
App Store	50b04938-223a-4ab1-a11d-00b03371abce	Shaoun 007	1/16/22 3:38	Emon's Review				en	sa	alrajhi	I have been using this App for a very long time and I can say for sure Its one of the besg bank out there and it's online customer services are great	en	use app long time say sure one besg bank online customer service great	Positive	App Store	0	0	0
App Store	763332bd-7dbb-4ef1-8797-631a2d56cbb8	Abdul Razak VDL	1/8/22 22:19	Happy				en	sa	alrajhi	Many more option added to make the transaction very easy	en	many option add make transaction easy	Positive	App Store	0	0	0
App Store	6dd9ad10-7109-4785-a8f8-244babb18e2c	lodylalall	8/6/23 4:25	Easy and user friendly				en	sa	alrajhi	Amazing app that ease your banking . I like the easiness of adding alrajhi bank beneficiary specially the call back confirmation feature Ø¥Ø¨Ø¯Ø§Ø§Ø§Ø§Ø¹	en	amaze app ease bank like easiness add alrajhi bank beneficiary specially call back confirmation feature	Positive	App Store	0	1	0
App Store	9de38594-a87e-4f5a-8c74-4a41d1f5498c	Shaabanoo	4/23/22 14:00	Thanks for good service				en	sa	alrajhi	Enjoying using the services of the application. Every thing become very easy	en	enjoy use service application every thing become easy	Positive	App Store	0	0	0
App Store	56be9b01-cb86-47b1-8550-2d83166be735	Albaqer	2/24/22 21:03	Easy to use application				en	sa	alrajhi	Easy to use application , quick transactions for all banking services	en	easy use application quick transactions bank service	Positive	App Store	0	0	0
App Store	305b92d8-4b80-4190-a695-d222f9f9e075	Somayah Mohammed	1/30/22 6:32	Excellent				en	sa	alrajhi	I like the new features, easy to use and well designed application interface	en	like new feature easy use well design application interface	Positive	App Store	0	0	0
App Store	71891ad7-235c-4651-89f0-b969f490bffc	Zeeeeeeeshan	1/20/22 9:59	Nice and user friendly				en	sa	alrajhi	Using more than 5 banking applications Inside and Outside the Kingdom. But Rajhi interface is one of the best on all of them	en	use bank applications inside outside kingdom rajhi interface one best	Positive	App Store	0	0	0
App Store	1aa8fb00-adec-45b4-a818-cd56a55c95d2	Sir3badi	8/23/23 7:03	You are the best				en	sa	alrajhi	i never wrote any comments to any app. but the enhancement for the app is amazing. i really appreciate your effort and support. keep up the great work.	en	never write comment app enhancement app amaze really appreciate effort support keep great work	Positive	App Store	0	0	0
App Store	d41b8cce-1d5c-43dc-aa1b-5c369546d03c	Noghaty	3/29/23 0:49	New version				en	sa	alrajhi	I donât like it. Itâs not clear and most of details itâs not appeared. The previous version was better.	en	dont like clear detail appear previous version good	Negative	App Store	1	0	0
App Store	54f510e6-3ce9-4d6c-ad8a-d51bace70ca6	NSDK58	12/11/22 15:31	Issue during international transfer				en	sa	alrajhi	Iâm facing a issue while money transfer to international which is asking to update Arabic name but after update it still shows the same . Kindly fix this issue .	en	im face issue money transfer international ask update arabic name update still show kindly fix issue	Negative	App Store	0	1	0
App Store	23c08474-3715-4a6d-81d1-295090d09e1f	WahajHasan	5/12/22 13:47	Excellent app so far!!				en	sa	alrajhi	They have improved the app and online experience alot. I wish they will improve branch banking as well.	en	improve app online experience alot wish improve branch bank well	Positive	App Store	0	0	0
App Store	bf4d3274-4fce-47f6-993c-2e6954d16956	Niaz Hussain	4/18/22 8:14	One of great online banking app				en	sa	alrajhi	Al Rajhi bank app has improved throughout years and itâs right time to appreciate this continuous improvement process by Al Rajhi team.	en	al rajhi bank app improve throughout years right time appreciate continuous improvement process al rajhi team	Positive	App Store	0	0	0
App Store	48894783-3f2e-425e-9b44-ca4c791a51ef	Kamal Askar	4/6/22 18:36	Always on the Top the best ever				en	sa	alrajhi	You are my favorite bank. Excellent services This an update: Al Rajhi is the Best Bank ever used in my life.. Again, the top finance application ð¹ð¹ April 2022: Still amazing services..	en	favorite bank excellent service update al rajhi best bank ever use life top finance application april still amaze service	Positive	App Store	0	0	0
App Store	6e8fecb2-706f-4bb3-b235-57c1fdf36c64	HamedAdil	4/4/22 17:04	Best eBanking services ever				en	sa	alrajhi	Alrajhi mobile is not even comparable to any other of the local bank in terms of user experience and ease of use	en	alrajhi mobile even comparable local bank term user experience ease use	Negative	App Store	0	0	0
App Store	aff7eb26-fc9b-4150-b777-6b111d551c99	Dr Mouli	2/21/22 8:58	Service is excellent Some times software errors				en	sa	alrajhi	The services offered are excellent, but done times I am facing sudden stoppage not working	en	service offer excellent do time face sudden stoppage work	Negative	App Store	1	1	0
App Store	bd7ef2df-3e82-41f8-bdf1-628073e30a39	jaseer alavi	2/2/22 11:17	If we are send money international always free				en	sa	alrajhi	If we are sending international money always free also suddenly can received money	en	send international money always free also suddenly receive money	Neutral	App Store	0	1	0
App Store	024465cf-4cf0-4794-a819-aac00b05280f	Eng. Dawsari	5/15/22 8:46	Improving				en	sa	alrajhi	Thanks for your improvements and hope you be the best Bank in the world.	en	thank improvements hope best bank world	Positive	App Store	0	0	0
App Store	c6a49cde-2dfc-480c-8445-9aca1420af5e	Khaled Elkholy Review	4/29/22 18:37	Great service				en	sa	alrajhi	excellent especially after last new update	en	excellent especially last new update	Positive	App Store	1	0	0
App Store	805a901a-b211-43a9-beb1-7679e1a15c65	Fffpff	4/27/22 16:10	Convenient				en	sa	alrajhi	I opened new account in Alrajhi Bank yesterday And compare it with others banks app is amazing The theme is comfortable for eyes and easy to use	en	open new account alrajhi bank yesterday compare others bank app amaze theme comfortable eye easy use	Positive	App Store	0	0	0
App Store	47619a9c-107c-4337-a91e-897def6505e5	Bassmah66	3/25/22 17:43	Wonderful app				en	sa	alrajhi	The new app is exceeding my expectations. Thanks to all the Alrajhi bank people and especially those who worked on that accomplished application	en	new app exceed expectations thank alrajhi bank people especially work accomplish application	Positive	App Store	1	0	0
App Store	94938f67-d869-4d42-b6ae-427aa35b1299	Aziz2000002	3/12/22 3:19	App				en	sa	alrajhi	It is sn nice app and you could have everything done throughout, but still customer care is strongly required	en	sn nice app could everything do throughout still customer care strongly require	Neutral	App Store	1	0	0
App Store	f0aefc0e-93ab-4cc9-af50-179dc4d10d46	Shaker alajabi	1/31/22 13:52	Application Alrajhi Mobile				en	sa	alrajhi	It is very useful and better than many Bank ðð½ðð½ðð½ donât use another this is advice .	en	useful good many bank dont use another advice	Positive	App Store	1	0	0
App Store	bd82d1cd-3b91-47e0-a930-e4c083509c62	AlBandarigh	1/22/22 1:33	Friendly bank app				en	sa	alrajhi	Easy to use and transfer money.	en	easy use transfer money	Positive	App Store	0	0	0
App Store	1fa78926-95b1-41a5-9214-dd67da47dc02	Kakkoii Ri	1/7/22 21:26	Perfect!				en	sa	alrajhi	Al-Rajhi app is totally dependable and easy to use! With a beautiful interface that is designed perfectly for daily use with no unrequited additions. Props to the developers! ð	en	alrajhi app totally dependable easy use beautiful interface design perfectly daily use unrequited additions prop developers	Positive	App Store	0	0	0
App Store	cf3ce20b-20f2-45f0-bde4-3279252b9c54	Rolan Mar	8/17/23 7:09	Very useful and fast				en	sa	alrajhi	Its so easy to use and you can be done with everything in seconds..	en	easy use do everything second	Positive	App Store	0	0	0
App Store	47c2fdba-8809-4d8d-979f-c378f8d50e51	qaetu2356	7/27/23 21:18	Amazing navigation for new updated app				en	sa	alrajhi	The new updated up navigation & interface are amazing As usual from alrajhi Thanks	en	new update navigation interface amaze usual alrajhi thank	Positive	App Store	0	0	0
App Store	7868e0a5-249b-4c75-8c9e-ebabf8af5a24	KhalilViajes	7/21/23 17:26	Big jump				en	sa	alrajhi	Banking has reached to its peak with such upgrades. What you did, took from one star to five. Keep it up	en	bank reach peak upgrade take one star five keep	Positive	App Store	1	0	0
App Store	aa1eea76-ef1a-4237-ab00-c4da5ee0ff0d	2Hamy	10/1/22 17:16	Better than before				en	sa	alrajhi	Now the service is better than before All the best	en	service good best	Positive	App Store	0	0	0
App Store	57d80102-f614-4e23-bd01-a9504d75e08d	Reghures	9/13/22 11:36	Online Transactions				en	sa	alrajhi	Flawless application and easy steps made faster online transactions.	en	flawless application easy step make fast online transactions	Positive	App Store	0	0	0
App Store	562a6253-618f-46d6-9be9-c2cbbea51bce	505845569	5/7/22 16:06	Good experience				en	sa	alrajhi	Very helpful platform where i can easily and smoothly process my financial transactions. Thank You!	en	helpful platform easily smoothly process financial transactions thank	Positive	App Store	0	0	0
App Store	caf0d2c4-3761-4e5f-bcb1-97757b477708	Alhsme	6/5/22 10:05	Worst program in programs world				en	sa	alrajhi	Iâve been using programs in general since 2010 And I never open an app store just to leave a comment but I gotta say that this program and this version is for far the worst ever the application literally closes before you transfer money & even sometimes before you open it ?	en	ive use program general since never open app store leave comment get ta say program version far bad ever application literally close transfer money even sometimes open	Negative	App Store	1	1	0
App Store	db23ae25-6598-43d4-b40a-28b03b7fa637	Dr. Mamdoh Alyousef	5/6/22 4:04	The update has too many issues.				en	sa	alrajhi	If itâs only necessary you may upgrade the app on your phone otherwise itâs collapses all the time and it freezes too many times i wish when the update it think of everything and everyoneâs need of the app. This is quite random idea.	en	necessary may upgrade app phone otherwise collapse time freeze many time wish update think everything everyones need app quite random idea	Negative	App Store	1	0	1
App Store	bcd2dfa7-cc08-42fe-851f-e65e5e9f5f85	NojoudSulaiman	7/4/23 16:04	The Best Bank App				en	sa	alrajhi	I am a banker and have couple of accounts in different banks. Never found a bank app as easy and direct as Alrajhi Bank.	en	banker couple account different bank never find bank app easy direct alrajhi bank	Neutral	App Store	1	0	0
App Store	7caa632d-d480-4fcd-9871-e43c24ed3aa0	ashahid025	5/16/22 10:34	Great Experience.				en	sa	alrajhi	User friendly and everything is on your finger tip, quick and easy ð	en	user friendly everything finger tip quick easy	Positive	App Store	0	0	0
App Store	d57a0890-9c71-446f-b8c4-e5b2a54f2b77	argonian_soldier	5/30/23 9:26	Urgent fix				en	sa	alrajhi	Please make the international beneficiaries easy to make just like other apps like stcpay and other transfer money apps. Because, I am having a very hard time to create new international beneficiaries. I want to transfer money using al rajhi bank app but it is not easy to create international beneficiaries. Please make it easier to the user of this app.	en	please make international beneficiaries easy make like apps like stcpay transfer money apps hard time create new international beneficiaries want transfer money use al rajhi bank app easy create international beneficiaries please make easy user app	Negative	App Store	0	1	0
App Store	553d2126-26e2-489c-95f1-d7c1bbfd36e5	Ahmed.saq	11/9/22 20:58	Great experience				en	sa	alrajhi	But missing some basic functions, like face id for fast login, and to extract the Credit card number, as now I canât see it	en	miss basic function like face id fast login extract credit card number cant see	Negative	App Store	0	1	0
App Store	a2e53eb3-387a-45cc-ba10-0f36e00bdf46	Alanezi.20	4/26/22 7:02	Reliable and highly recommended				en	sa	alrajhi	Highly available and reliable app ðð»	en	highly available reliable app	Positive	App Store	0	0	0
App Store	ff0ddc80-1abf-45ec-adf8-f74d3fbe9ffd	Sampiero013	4/8/22 22:57	Love dealing in this app				en	sa	alrajhi	Easy access and smooth processing big change and wonderful update.	en	easy access smooth process big change wonderful update	Positive	App Store	0	0	0
App Store	2312759c-b06e-4456-8694-fd880967312c	Israr Rudbari	4/8/22 17:23	Best Banking service				en	sa	alrajhi	I am using Al Rajhi for last 5 years and its services are one of the best. I love about Al rajhi is continues up gradation of its service to facilitate its users more and more.	en	use al rajhi last years service one best love al rajhi continue gradation service facilitate users	Positive	App Store	0	0	0
App Store	7ff4c4ab-8d42-4cbf-82d1-12c8962acf34	m4rw4n	2/9/22 18:43	Best App				en	sa	alrajhi	We all know this App is so easy and not like other Banks Apps , you can do anything just in a moment , Thank you so much for this amazing App.	en	know app easy like bank apps anything moment thank much amaze app	Positive	App Store	0	0	0
App Store	141274f8-c991-44d2-b135-ab9b055d658a	Jamal Khidir	1/22/22 11:10	Excellent service as always				en	sa	alrajhi	Your online service extremely excellent	en	online service extremely excellent	Positive	App Store	0	0	0
App Store	8fa7b6aa-08f2-428d-9ab9-2f0a4d8c3e01	ashrafaayounis	1/15/22 9:54	The new mobile application is more than excellent				en	sa	alrajhi	The new mobile application is more than excellent	en	new mobile application excellent	Positive	App Store	0	0	0
App Store	146beb70-2831-4201-8384-724db01b8ed2	Abdulaziz Thebb	8/20/22 14:38	Really Bank for future				en	sa	alrajhi	I strongly recommend to start with awesome bank and most services existing.	en	strongly recommend start awesome bank service exist	Positive	App Store	1	0	0
App Store	90045b6c-0db0-4ab0-ad1a-d056ede7a404	Shams Joufi	9/12/23 1:05	Mobile app session time out issue				en	sa	alrajhi	Every time I login to mobile app, as soon as I logged in, it terminates the session by saying session time out message. Cannot login through mobile app. Please resolve this issue.	en	every time login mobile app soon log terminate session say session time message login mobile app please resolve issue	Negative	App Store	0	1	0
App Store	f6e7f208-59ce-4ccd-a924-81743106ae69	Shihad Ibrahim	5/14/22 18:14	Fast service				en	sa	alrajhi	Wonderful experience with fast service	en	wonderful experience fast service	Positive	App Store	0	0	0
App Store	412c0f6b-d419-478e-a60c-27d7a603d928	phantom4444	5/4/22 13:27	Best ever Customer Experience				en	sa	alrajhi	One and only one bank best top bank in both services and varieties of financial loans. You canât lose with AlRajhi Bank.	en	one one bank best top bank service varieties financial loan cant lose alrajhi bank	Positive	App Store	1	0	0
App Store	336e26ab-e202-458a-a5cf-164a2b3fc7e5	Omar Zei	4/28/22 3:29	Good				en	sa	alrajhi	But need more offer on credit cards and more improvements in application	en	need offer credit card improvements application	Neutral	App Store	1	0	0
App Store	248d2f76-00ff-4e75-b344-8a4ab6ae272f	R.Khater	4/19/22 9:48	User friendly				en	sa	alrajhi	Amazingly easy interface ð¤ð¤	en	amazingly easy interface	Positive	App Store	0	0	0
App Store	8764a250-afb2-49a6-962d-31c23a69d914	Allvazurz	4/17/22 12:46	Good UI and easy to navigate				en	sa	alrajhi	Very easy to navigate and easy User interface to use the application.	en	easy navigate easy user interface use application	Positive	App Store	0	0	0
App Store	0eed9cb6-4e00-4667-80ae-a14edad37844	Dr.saif alharbi	4/3/22 8:11	My evaluation				en	sa	alrajhi	in the comparison to the last app, itâs great app and have different options with easy way.	en	comparison last app great app different options easy way	Positive	App Store	1	0	0
App Store	6ea610ad-9228-4751-9739-70ce4be65d24	iibrahimoo	3/29/22 17:40	Practical and effective				en	sa	alrajhi	Iâm using the app for daily transactions and very well effective and easy to use	en	im use app daily transactions well effective easy use	Positive	App Store	0	0	0
App Store	d6e41490-2acf-42fc-863c-e95740543c21	TSQ11	3/12/22 19:02	Great app update				en	sa	alrajhi	I have been enjoying the recent app update. Very smooth and user friendly.	en	enjoy recent app update smooth user friendly	Positive	App Store	0	0	0
App Store	32f39920-0cf4-4e8c-a839-c39a063dfeb4	Soso424	2/24/22 12:46	Fantastic				en	sa	alrajhi	Excellent online service and onsite service as well Highly recommended bank	en	excellent online service onsite service well highly recommend bank	Positive	App Store	0	0	0
App Store	14d1b31b-1b0c-4718-9844-99e6cc8e426f	mmajshhd	2/10/22 6:38	Perfect				en	sa	alrajhi	It was the perfect app. But Canât open now. After enter OTP automatically shut down the app. How can I resolve the issue. I am using iPhone 6s.	en	perfect app cant open enter otp automatically shut app resolve issue use iphone	Negative	App Store	0	1	0
App Store	6dfaca7e-48f6-4760-bfa1-43984280e9d0	Ammurii	2/2/22 8:08	The best Saudi banking app out there				en	sa	alrajhi	Period. I canât begin to explain how well made the app runs and allows me to do a lot of the things I wanted.	en	period cant begin explain well make app run allow lot things want	Positive	App Store	0	1	0
App Store	6cdd90dd-4638-44b9-bdc5-68595abc42bb	M.Ayed	1/10/22 16:45	Totally recommend				en	sa	alrajhi	Very practical ,easy to handle with full of features	en	practical easy handle full feature	Positive	App Store	0	0	0
App Store	d9976724-b571-40f4-a281-46de74f63da3	aleezay kashif	9/21/23 21:53	User friendly				en	sa	alrajhi	Very user friendly app and navigation is super easy	en	user friendly app navigation super easy	Positive	App Store	0	0	0
App Store	cb584f34-c088-4cbf-8ab5-755e2545d732	abdul ali chaudhry	11/29/22 7:30	Five star experience				en	sa	alrajhi	Highly impressed from opening to operating, will highly recommend rajhi	en	highly impress open operate highly recommend rajhi	Positive	App Store	0	0	0
App Store	ac73cf79-5167-436c-a82b-73cc48d932f5	H12n12o	5/2/22 19:52	Too much updating				en	sa	alrajhi	Too much updating .please ask me before update	en	much update please ask update	Negative	App Store	0	1	0
App Store	9cc78111-8f4c-4e1e-9c1e-67959e253c72	moe_fcb	4/25/22 17:10	Absolutely Perfect Application				en	sa	alrajhi	Whenever and wherever, with this app just a clicks and I can do all my work without visiting the branches Regards	en	whenever wherever app click work without visit branch regard	Positive	App Store	0	1	0
App Store	b6baf4b6-ec89-4361-8df5-8b6f99bde75e	Your addicted	4/24/22 17:48	Amazing Improvement				en	sa	alrajhi	Please continue this level of improvement as one of the amazing banks	en	please continue level improvement one amaze bank	Positive	App Store	1	0	0
App Store	ea80caf9-5353-4635-b455-02118584390e	Abdallah132	4/23/22 19:12	More than excellent				en	sa	alrajhi	Just old people need big font to see perfect Thank you	en	old people need big font see perfect thank	Neutral	App Store	1	0	0
App Store	25a123e4-c1ed-4478-84cd-fecc16bb926a	Mufeed Saeed	4/16/22 7:23	Many thanks for such quick app				en	sa	alrajhi	Really appreciate your ongoing development to achieve such wonderful application	en	really appreciate ongoing development achieve wonderful application	Positive	App Store	0	0	0
App Store	f5e59cb0-a428-4078-a0ec-10b93c17d1d3	Ahmed Abdellah 010	3/23/22 7:17	Everything				en	sa	alrajhi	I love this bank and everything is so easy	en	love bank everything easy	Positive	App Store	0	0	0
App Store	f23446b1-ca51-41a5-86ef-789acf4a9bea	israt ali	3/16/22 17:59	Good apps				en	sa	alrajhi	Itâs very good for online services & very easy to use I really like it thanks to alrajhi make my all payment & transition too easy	en	good online service easy use really like thank alrajhi make payment transition easy	Positive	App Store	0	0	0
App Store	5747f819-657d-4391-9c0c-f5d8bf2abe39	dalorianman	3/15/22 5:29	Has become more better				en	sa	alrajhi	I am impressed by this app every time there is an update. Good work!	en	impress app every time update good work	Positive	App Store	0	0	0
App Store	27289ed1-d7e4-4ae2-a866-07910a0916fa	nin9t	1/27/22 1:51	Easy to Use				en	sa	alrajhi	Clear User interface, easy to use, Fast and reliable always	en	clear user interface easy use fast reliable always	Positive	App Store	0	0	0
App Store	dd58abca-5c5b-4e83-a344-ccba3aea0204	Shain💋	1/4/22 12:12	Access on the Go				en	sa	alrajhi	Mobile check deposit & instant spending notification	en	mobile check deposit instant spend notification	Neutral	App Store	0	1	0
App Store	db5baece-43fa-42b7-b369-a1094527e976	saif ami	7/3/23 17:03	Services all easy and good				en	sa	alrajhi	Anyone can use easily banking services from this app and all services is very good	en	anyone use easily bank service app service good	Positive	App Store	0	0	0
App Store	a6ced1cd-aa5d-4300-95d2-472bda196fe1	baladangam	7/8/23 5:56	International transfer				en	sa	alrajhi	International fund transfer is not working it sayâs enter your Arabic nameâ¦ I went to branches many times but they say canât doâ¦ thru customer service they say only it can be done by branch worst experiences kindly look in to it. Thanks	en	international fund transfer work say enter arabic name go branch many time say cant thru customer service say do branch bad experience kindly look thank	Negative	App Store	1	1	0
App Store	73fe22a0-093e-4ccf-a97a-abe47939f584	AhShedeed	6/11/23 13:20	Thanks Al Rajhi Bank				en	sa	alrajhi	The best online banking experience you would ever see. Really Al Rajhi Bank maintained the hardest equation ,, to be the oldest bank and the most innovative at the same time ð«¡.	en	best online bank experience would ever see really al rajhi bank maintain hard equation old bank innovative time	Positive	App Store	0	0	0
App Store	fd4630a7-7720-49c9-9e74-ae7b57b8eb9d	Ggshdhdh	3/29/23 9:36	Getting smoother				en	sa	alrajhi	I like the way it functions, itâs getting smoother with each release.	en	like way function get smooth release	Positive	App Store	1	0	0
App Store	7a000873-8c18-4d44-803c-180561879896	touseef sardar	6/28/22 15:45	God bless you				en	sa	alrajhi	You provide such a helpful platform for money transfer to our beloved thank you	en	provide helpful platform money transfer beloved thank	Positive	App Store	0	0	0
App Store	a9eeed9e-ba4c-4633-b78e-213664976b38		5/2/22 2:10	10-Oct				en	sa	alrajhi	User friendly, efficient and well-designed.	en	user friendly efficient welldesigned	Positive	App Store	0	0	0
App Store	cb6f8e6e-0a6a-4282-aa4c-1c4ba5847469	WECWUIT	4/17/22 20:36	Very well made and polished				en	sa	alrajhi	10/10. the best, most convenient and easy-to-use banking application.	en	best convenient easytouse bank application	Positive	App Store	0	0	0
App Store	4cae4b44-ffd9-4ffa-afd1-7de4a7b3458a	srfahim	4/13/22 9:26	Excellent app				en	sa	alrajhi	Very convenient and easy to use, you donât have to enter long long in pw and wait for OTP, itâs simple and fast	en	convenient easy use dont enter long long pw wait otp simple fast	Positive	App Store	1	0	0
App Store	d049e9a4-f2a0-436e-b187-d99d753ee62a	wello_1993	4/2/22 9:38	Easy to use user interface, and very quick!				en	sa	alrajhi	Love how you can easily add beneficiaries and make transfers	en	love easily add beneficiaries make transfer	Positive	App Store	0	1	0
App Store	698cd6f9-9a7d-4872-818a-0dc86e68257a	🚶🏼‍♂️🚶🏼‍♂️🚶🏼‍♂️🚶🏼‍♂️	2/20/22 7:24	Not too bad				en	sa	alrajhi	Need to change phone number from the app	en	need change phone number app	Neutral	App Store	1	0	0
App Store	726c095d-6eb3-422b-87c5-a13ee6f3a3e0	Nawaf AlEnazi	1/15/22 19:23	Really we appreciate Al-Rajhi services				en	sa	alrajhi	Thank you, Al-Rajhi application made it easy for us to do all banking operations while we are at home without going to the branch or to ATM machine	en	thank alrajhi application make easy us bank operations home without go branch atm machine	Positive	App Store	1	0	0
App Store	177d41eb-b74a-4ae6-b16b-737b8491edb4	dente3li	1/6/22 19:47	Huge advancement..keep up				en	sa	alrajhi	Very convenient experience friendly user app for my banking services	en	convenient experience friendly user app bank service	Positive	App Store	0	0	0
App Store	1b48e2cf-7604-4f04-8bb9-76537df4b84e	Bandar-2008	9/17/23 6:51	My experience				en	sa	alrajhi	The real digital banking application, making our life easier. Thanks ðð»	en	real digital bank application make life easy thank	Positive	App Store	0	0	0
App Store	e3ea6e79-8756-4336-abb7-b570e14619ee	Aaryan sher	6/15/23 11:16	I am Working in GPS tracking system company				en	sa	alrajhi	Al rajhi is best bank for ever and best rates always i am using perfect Using since 8 years Its Very perfect	en	al rajhi best bank ever best rat always use perfect use since years perfect	Positive	App Store	0	0	0
App Store	ace9c354-a481-4703-a7f7-9f236cf862fd	Abu Boshra	4/25/22 10:08	Notifications tab				en	sa	alrajhi	Not working	en	work	Neutral	App Store	0	1	0
App Store	717760d9-2f03-411e-85ef-b1cfc04a9790	ShdaSA	4/24/22 23:54	The best banking app in KSA				en	sa	alrajhi	User friendly UI. Always up and running. Almost all banking services are available on the app	en	user friendly ui always run almost bank service available app	Positive	App Store	1	0	0
App Store	dbcdbda4-fc03-495d-a738-3a6e2ea4d029	Mohammed M Aldossary	4/4/22 15:45	RJH				en	sa	alrajhi	RJH new application is amazing. After their recent changes and new digital platforms i start loving banking with them and i am shifting to them	en	rjh new application amaze recent change new digital platforms start love bank shift	Positive	App Store	1	0	0
App Store	4e5d8283-2dce-49bd-b4d1-14a9beef991e	Mohab.Elsayed	3/21/22 5:43	Progressive				en	sa	alrajhi	A very good mobile banking app which is easy to use and extremely effective.	en	good mobile bank app easy use extremely effective	Positive	App Store	0	0	0
App Store	5851ae72-ecb6-41ee-8743-fec5ca002a30	esagbf	2/19/22 20:09	Powerful and efficient application				en	sa	alrajhi	Very simple and efficient application that helps me doing all what I need in real time.	en	simple efficient application help need real time	Positive	App Store	1	0	0
App Store	056976fb-8499-4ea1-8f9b-9bf2d77c4be5	shahbaz Ali khan	1/25/22 20:52	Good				en	sa	alrajhi	What is the option meaning of Kerla or not Kerla in your application please tel me if Iâm not Kerla what is problem if Iâm Kerla what is my benefit please let me know thank you so much	en	option mean kerla kerla application please tel im kerla problem im kerla benefit please let know thank much	Neutral	App Store	0	1	0
App Store	9d4d0f47-58fd-45c6-a574-871358e2e9d7	tot2006	2/5/22 9:04	Disappearing				en	sa	alrajhi	Thereâs a problem with the app long time ago During using the app , suddenly the app off and disappear from the main screen and need to log in again	en	theres problem app long time ago use app suddenly app disappear main screen need log	Negative	App Store	0	1	0
App Store	74db796b-b88d-42f4-b0e9-afd92eb9582c	Lulumsh	5/25/22 5:48	Easy and convenient				en	sa	alrajhi	Like the application. User friendly	en	like application user friendly	Positive	App Store	0	0	0
App Store	513fbf05-f37b-44af-9426-3789aedda0c7	shwaa3il	11/15/22 6:02	Can’t access app even after updating				en	sa	alrajhi	I updated the app and every time I want to access the application it keeps sending me back to Apple store to update and when I click on OPEN app I still get the message that I need to update	en	update app every time want access application keep send back apple store update click open app still get message need update	Negative	App Store	0	1	0
App Store	957abd0f-50c7-4a29-8d00-845b73330d99	Aseel aziz	4/29/22 17:59	Amazing experience (tried over 5 banks and it’s by far the best)				en	sa	alrajhi	Amazing experience (tried over 5 banks and itâs by far the best)	en	amaze experience try bank far best	Positive	App Store	0	0	0
App Store	f02363f2-6b1c-400b-af04-c6f0adee6799	Stophere	4/26/22 12:08	Wonderful and interesting				en	sa	alrajhi	Easy access and steps	en	easy access step	Neutral	App Store	0	0	0
App Store	5410b7f2-09be-4f62-85e3-436903056f70	hdew88	4/24/22 15:41	Very good				en	sa	alrajhi	The perfect bank application if you just make the sign in page the first one to appear ðð¼ðð¼	en	perfect bank application make sign page first one appear	Positive	App Store	1	0	0
App Store	7ae85fd2-49dc-495b-a034-82d06b68af90	sahdudeen	4/24/22 3:20	Easy				en	sa	alrajhi	Easy and convenient for online transaction	en	easy convenient online transaction	Positive	App Store	0	0	0
App Store	e21ea7e2-0906-4e80-b02c-bd72583ad61a	AbuZiyad05	4/24/22 2:22	Perfect				en	sa	alrajhi	Friendly interface	en	friendly interface	Positive	App Store	0	0	0
App Store	10957136-e55c-4c0f-a004-daa09ad20278	Aynems	4/19/22 19:41	Good				en	sa	alrajhi	Good service we save a time and do your work quickly just few mints	en	good service save time work quickly mint	Positive	App Store	0	0	0
App Store	fcb84892-905a-4889-a38a-da82c569fccd	John 3574	4/6/22 15:54	Best Bank App				en	sa	alrajhi	Everything you need from you bank , and even more.	en	everything need bank even	Positive	App Store	1	0	0
App Store	5728059a-71e3-466a-a97e-3d9f956b127d	Mudassar Anwar	4/5/22 17:51	Transfer				en	sa	alrajhi	Thank you so much is fast speed to transfer moneyâ¦ð	en	thank much fast speed transfer money	Positive	App Store	0	0	0
App Store	706f7c8b-2c58-4f5d-ba40-5ed5f492d375	mohm.112112	4/4/22 18:11	Abha				en	sa	alrajhi	Good application. Very easy to use and quick. I had a very good experience with this application. Keep up the good work.	en	good application easy use quick good experience application keep good work	Positive	App Store	0	0	0
App Store	1611735e-0311-46f5-a26e-95be9290a301	ibrahimtanoly	3/13/22 19:33	Crashing				en	sa	alrajhi	E market crashing sometimes	en	e market crash sometimes	Negative	App Store	0	1	0
App Store	068b740c-f2f3-4877-a73e-fafed0ccf0b1	Selsayed2409	3/1/22 22:08	Rajhi online great				en	sa	alrajhi	Rajhi Online banking easy and smart way in handling our daily payment with multi channels in easy , smart and secured manner.	en	rajhi online bank easy smart way handle daily payment multi channel easy smart secure manner	Positive	App Store	0	0	0
App Store	14c273be-bb0f-49de-b7cd-33f83fe66530	Imtiaz Masood	2/7/22 15:40	Excellent Application				en	sa	alrajhi	Very convenient and easy to use. Outstanding service and performance.	en	convenient easy use outstanding service performance	Positive	App Store	0	0	0
App Store	90bdb684-cf13-442e-8f49-f59426b97c2e	TZGHAURI	6/11/23 9:48	Improved application				en	sa	alrajhi	Itâs really nice to use updated application Easy to use and excellent service Regards	en	really nice use update application easy use excellent service regard	Positive	App Store	0	0	0
App Store	c62d7c92-2af5-4492-aaf6-b65049334883	go8808	5/15/22 19:48	Love it				en	sa	alrajhi	The best bank application I ever used , the UI is amazing and always updated and user friendly	en	best bank application ever use ui amaze always update user friendly	Positive	App Store	0	0	0
App Store	11ddb7a0-bfcb-4c7c-8e7a-3882c237abf0	Y.S.Salamah	4/9/22 20:41	The best forever..				en	sa	alrajhi	For more than 20 years of experience with Alrajhi Bank it is the best and the more interesting one.	en	years experience alrajhi bank best interest one	Positive	App Store	0	0	0
App Store	e4e47d01-a8e9-4b22-b4ca-3313e1291034	feedback19281	2/21/22 7:59	Improving				en	sa	alrajhi	I like the quick features Keep improving	en	like quick feature keep improve	Positive	App Store	0	0	0
App Store	bcc07006-16a4-4e50-b8a2-9aa26d6906cd	blackbilly777	2/5/22 9:03	Money transfer				en	sa	alrajhi	This is easy and safe low charge too thanks!	en	easy safe low charge thank	Positive	App Store	0	0	0
App Store	0f1df19a-1893-4b9e-867c-f9ec240003a3	Milan is the best	2/3/22 19:55	Great app				en	sa	alrajhi	Great app compared to the previous one , but I couldnât look at my credit card statement.	en	great app compare previous one couldnt look credit card statement	Positive	App Store	1	1	0
App Store	1eaf015a-6e50-4cec-bbcb-bd6c3d0c10b5	Lolyana1	5/13/22 17:03	Good				en	sa	alrajhi	I enjoyed the application but I wish u can return the face ID feature again	en	enjoy application wish u return face id feature	Positive	App Store	0	1	0
App Store	b803c906-ec94-4263-84a9-415c5c68a589	ahmedsiraj	9/7/22 11:02	Hang always				en	sa	alrajhi	Always stuck or hang in my iphone any solution i have reinstall and update it but same	en	always stick hang iphone solution reinstall update	Negative	App Store	0	1	1
App Store	0123cd96-ef44-4cc7-beea-3277577eee1c	irshad 12	5/12/22 15:53	Fast				en	sa	alrajhi	Quality service and fast and safe	en	quality service fast safe	Positive	App Store	0	0	0
App Store	5cbb40cb-0e37-467e-a3b1-211bd7b148a9	hamid mughal	4/28/22 1:31	Quick SERVISE through banking to banking				en	sa	alrajhi	I am really inspired by recent quick service of alrajhi bank to international bank.	en	really inspire recent quick service alrajhi bank international bank	Positive	App Store	0	0	0
App Store	156b13d0-2e76-44cb-b804-7d9823e260bc	Ayman Almanie	4/26/22 14:40	Great app with nice interface				en	sa	alrajhi	I like this application. It is easy to use and has a nice look and feel.	en	like application easy use nice look feel	Positive	App Store	0	0	0
App Store	78af05e7-8cff-40e9-9295-00c16f6d1133	algamts	4/22/22 11:05	Bank Alrajhi now is delivering very good service				en	sa	alrajhi	Before bank Alrajhi is the worst bank. Now is the best bank to deliver updates good services	en	bank alrajhi bad bank best bank deliver update good service	Negative	App Store	1	0	0
App Store	2b048ad8-250d-4adc-a06d-b873d96f1488	Saud١١١١١	4/18/22 11:11	It’s always better than before				en	sa	alrajhi	The application is great	en	application great	Positive	App Store	0	0	0
App Store	55fd5a29-bf14-4fb7-9c0c-b84f5b2a7446	sskhs	3/14/22 12:24	International transfer is very easy and quick.				en	sa	alrajhi	Perfect online services.	en	perfect online service	Positive	App Store	0	0	0
App Store	6a486ed0-6806-4678-8d0a-9280491537ca	Rajihi Customer	2/1/22 5:52	Admiration				en	sa	alrajhi	Your online Application worth more than five star... itâs amazing and fast to process the transaction	en	online application worth five star amaze fast process transaction	Positive	App Store	0	0	0
App Store	59c4fc07-6dec-418b-99b0-940d3118af91	Baraa Bakkar	1/22/22 18:03	Best Banking Services App				en	sa	alrajhi	By far, it is the best banking services app with unlimited features and a very intuitive user interface.	en	far best bank service app unlimited feature intuitive user interface	Positive	App Store	0	0	0
App Store	076117d6-440d-4ceb-a5c0-0c101177be88	A.N.T90	1/3/22 19:46	Easy and fast				en	sa	alrajhi	Very useful to have on the phone, and great customer service.	en	useful phone great customer service	Positive	App Store	0	0	0
App Store	677e9b04-ddb4-45a5-a255-a2cc751f0e56	Susu.S.O	8/24/23 13:09	Best banking service app				en	sa	alrajhi	So easy to use in and all what you need is available	en	easy use need available	Positive	App Store	0	0	0
App Store	c2cb4238-e80a-4a37-b03e-7caaf0224837	Erum shariff	7/21/23 1:29	Happy customer				en	sa	alrajhi	Really easy and fast experience. Especially we enjoy ribaa free services of AlRajhi bank. Thank you Alrajhi stay blessed	en	really easy fast experience especially enjoy ribaa free service alrajhi bank thank alrajhi stay bless	Positive	App Store	0	0	0
App Store	f3498b3b-005d-40a8-8b43-754ca08822de	ziauetain	6/9/23 9:46	Best Banking App				en	sa	alrajhi	Very easy to use including 1. Money transfer 2. Adding Beneficiaries flawlessly 3. Bill Payments 4. Govt payments and alot moreâ¦	en	easy use include money transfer add beneficiaries flawlessly bill payments govt payments alot	Positive	App Store	0	1	0
App Store	6597bc36-a04c-4b00-8c6d-bbf8ca9cd67f	aa5ab	4/23/22 17:43	Riyadh				en	sa	alrajhi	Application itâs perfect Iâll be fast to work and And complete my work having to go to the bank Thanks Al Rajhi bank	en	application perfect ill fast work complete work go bank thank al rajhi bank	Positive	App Store	0	1	0
App Store	08d4cec7-903a-44c6-820b-5e1d40569db7	mshamani	3/14/22 13:37	Best Bank				en	sa	alrajhi	I recommend everyone to open account and enjoy this amazing app.	en	recommend everyone open account enjoy amaze app	Positive	App Store	0	0	0
App Store	7ccdbc60-3add-44ac-a919-882a63454328	Hajer almuhajer	3/8/22 10:40	Rating				en	sa	alrajhi	Safe and quick transactions, thank you	en	safe quick transactions thank	Positive	App Store	0	0	0
App Store	41e837e4-3f9b-4e91-a372-3c93743d993a	khan1959	2/21/22 6:26	Fantastic service				en	sa	alrajhi	Very fast and quick service	en	fast quick service	Positive	App Store	0	0	0
App Store	8dacce16-5eb6-45a8-82fe-3577bcb2b9b8	jcastro1111	2/3/22 7:42	Good service				en	sa	alrajhi	All are very good. From personnel to the services. Online banking is easy to use and your money is protected	en	good personnel service online bank easy use money protect	Positive	App Store	0	0	0
App Store	7a311828-a134-4bde-8e2b-5f2635cfd9d3	It's helpful & useful!!	1/22/22 17:19	Beneficiary name not shown				en	sa	alrajhi	There is a big mistake when performing a financial transfer as beneficiary name isnât shown before confirming the transaction.	en	big mistake perform financial transfer beneficiary name isnt show confirm transaction	Negative	App Store	1	1	0
App Store	484d5532-8b21-4f34-bc00-47cf60e94f69	Abu Jaser	1/20/22 9:46	Easy access				en	sa	alrajhi	Better performance,easy access itâs really amazing updates keep it up	en	good performanceeasy access really amaze update keep	Positive	App Store	1	0	0
App Store	0444571a-9c94-4d0e-ac01-93fc729e3477	HAMADA242	9/6/23 20:48	Easy to use				en	sa	alrajhi	Easy and clear. Thank you ALRAJHI for your hard work in this application	en	easy clear thank alrajhi hard work application	Positive	App Store	0	0	0
App Store	eb4506be-2a5c-4af0-a0fb-81fad62d88af	Ahmad Al-Saudi	6/1/23 10:47	Digital banking experience				en	sa	alrajhi	A great digital banking experience. User friendly interface.	en	great digital bank experience user friendly interface	Positive	App Store	0	0	0
App Store	133e646b-0076-41d1-a1f6-65ab7389a7a9	Lanka mm2	4/26/22 22:54	Good and useful				en	sa	alrajhi	Easy , clear , fast .. much better than the one before â¨â¨â¨grateful for it ð	en	easy clear fast much good one grateful	Positive	App Store	0	0	0
App Store	e19e99e5-d138-4812-b411-dc1c426e24a5	Abu naser 121	2/23/23 7:36	Best babk				en	sa	alrajhi	bank Easy is to use and many service also available a lot of features in the app . No bank can reach to the latest of hi tech . . Br	en	bank easy use many service also available lot feature app bank reach late hi tech br	Positive	App Store	0	0	0
App Store	d615e43f-a4dd-47c7-9842-2ebb923088b9	Basheer A Almusbahi	4/14/22 21:39	Perfect app				en	sa	alrajhi	congratulations Rajhai bank for the good service which you are providing to your customer	en	congratulations rajhai bank good service provide customer	Positive	App Store	0	0	0
App Store	795e9b20-3897-4747-957f-f39b099373a9	mughamer	4/5/22 6:58	Excellent application				en	sa	alrajhi	Clear, easy to use & friendly	en	clear easy use friendly	Positive	App Store	0	0	0
App Store	eb18d0db-ee0d-46a0-846c-b186f3d31d62	mohammedbash24	3/28/22 14:04	Easy				en	sa	alrajhi	Easy to use easy to access can send more than 50,000 in one time I love al rajhi bank	en	easy use easy access send one time love al rajhi bank	Positive	App Store	0	0	0
App Store	7791991c-5ca4-4ecd-a76c-61872716d93d	MI Malik	3/22/22 5:14	Excellent Service				en	sa	alrajhi	Easy to process all bank transactions	en	easy process bank transactions	Positive	App Store	0	0	0
App Store	e22c9c76-7557-408e-98e7-d596910bfdeb	t4wh1d	3/17/22 16:30	Finally a very nice app.				en	sa	alrajhi	This version of Rajhi bank app is very nice and easy to work, I guess future Rajhi should combine Aman al Rajhi with this one to generate secret codes. Thank you.	en	version rajhi bank app nice easy work guess future rajhi combine aman al rajhi one generate secret cod thank	Positive	App Store	0	0	0
App Store	822651c6-cb8d-4a55-874e-1c1082ef8d9c	JayRyanM	3/15/22 14:58	Very convenient				en	sa	alrajhi	Very convenient to send money to our family international(philippines)	en	convenient send money family internationalphilippines	Positive	App Store	0	0	0
App Store	d7d02357-5e76-468a-86ff-4e6766888ce6	Ashfaq Awan	3/14/22 9:16	Thanks for your support				en	sa	alrajhi	I have liked it is too easy.	en	like easy	Positive	App Store	0	0	0
App Store	d79a2f30-ec9d-4c9d-b9f0-774a9d7b2495	m_wadi	3/12/22 3:41	Very good bank app				en	sa	alrajhi	Alrajhi bank app is very good. The interface is easy to use. There are variety of services.	en	alrajhi bank app good interface easy use variety service	Positive	App Store	0	0	0
App Store	52a7881e-8c7c-4c6b-a294-820d35b9a1c5	jaisickness	3/11/22 6:07	Connection refuse				en	sa	alrajhi	Newly updated but gives immediate problem.. sad update	en	newly update give immediate problem sad update	Negative	App Store	1	0	0
App Store	4c8449bf-43bd-4a99-9b72-b3555ced73e0	GnrCmp	3/11/22 4:36	ERROR! CONNECTION REFUSES				en	sa	alrajhi	This update didnât allow me to log in in to my account. Canât even access all features.	en	update didnt allow log account cant even access feature	Negative	App Store	0	1	0
App Store	1b4d07e9-cbaf-4813-8472-0eb51df08fbe	Amjad khalid	2/15/22 18:31	nicest bank application i have ever seen				en	sa	alrajhi	Extremely nice user interface	en	extremely nice user interface	Positive	App Store	0	0	0
App Store	28df9e08-c94f-4c5b-a773-714af4a7d183	Ramesh Panthangi	1/9/22 8:40	Ramesh Panthangi				en	sa	alrajhi	Excellent app! I liked it very much. It is very fast and user friendly. I really appreciate the whole teamðð	en	excellent app like much fast user friendly really appreciate whole team	Positive	App Store	0	0	0
App Store	d0c3f641-b8c9-418d-a65c-8dbf325d05ff	Ali Badughaish	9/20/23 10:28	Thanks to Rajhi bank				en	sa	alrajhi	I want to thank the Rajhi for the excellent IT application. Also I want to thank Mr Salem Omar Badughaish from Coustomer a service ( Azizyah branch Khobar ) for his prompt action and excellent service	en	want thank rajhi excellent application also want thank mr salem omar badughaish coustomer service azizyah branch khobar prompt action excellent service	Positive	App Store	0	0	0
App Store	ddec5fc8-8b4a-4aee-bfc2-aff95710a170	عمر الرفيدي	8/27/23 20:39	Best bank application				en	sa	alrajhi	Hopefully other banks provide same services	en	hopefully bank provide service	Neutral	App Store	1	0	0
App Store	8362009c-0e4e-481a-adbb-80f7d42d47c8	Sou35	3/27/23 13:22	Outstanding app				en	sa	alrajhi	Iâm impressed! They took the banking experience to a new level!	en	im impress take bank experience new level	Positive	App Store	1	0	0
App Store	e514746a-9e2e-42e7-b4d6-e651559a4fda	Y7ya000	2/18/23 9:20	Best Bank Application so far				en	sa	alrajhi	Easy access, simple and clear and trustworthy.	en	easy access simple clear trustworthy	Positive	App Store	0	0	0
App Store	4f1f4757-1141-4eb6-80cf-967694995507	naif a e	8/29/22 6:55	Always good				en	sa	alrajhi	The bank service always developed and became better	en	bank service always develop become good	Positive	App Store	1	0	0
App Store	70b3fba2-0394-432d-ab19-5ad598904278	aj edrean	11/2/22 10:53	Sending				en	sa	alrajhi	I like alrajhi bank but i cannot transfer international beneficiary after update my acount. The problem i need to update my arabic name why?	en	like alrajhi bank transfer international beneficiary update acount problem need update arabic name	Negative	App Store	0	1	0
App Store	9eed01dc-292c-481f-8de9-88a020af1e66	MTatiana Perez	10/28/22 11:58	deduction				en	sa	alrajhi	I don't understand why the remaining balance shown and the actual balance are different. It's confusing	en	dont understand remain balance show actual balance different confuse	Negative	App Store	1	0	0
App Store	65c21baf-f377-4909-b35f-b499ad7045ea	Mahdi Balhareth	8/21/22 10:49	Easy to use				en	sa	alrajhi	Very easy to make transactions. I recommend	en	easy make transactions recommend	Positive	App Store	0	0	0
App Store	88ebc986-98c0-4760-8e70-55b44dfaf793	mohammedkaibni	5/26/22 4:04	Well organized				en	sa	alrajhi	Best app for my bank account	en	best app bank account	Positive	App Store	0	0	0
App Store	409e693b-4086-4a43-908b-724ec42090a2	lord_zx	4/16/22 11:47	Best app for my bank account				en	sa	alrajhi	High quality work and perfect performance	en	high quality work perfect performance	Positive	App Store	0	0	0
App Store	39c0acce-6faa-4435-88ac-cba9bbd5e613	Nsjekbzhkleiur	4/6/22 1:51	Best Bank application Alrajhi Bank				en	sa	alrajhi	User friendly everything is organized and systematic. I love Alrajhi Bank its the best bank!	en	user friendly everything organize systematic love alrajhi bank best bank	Positive	App Store	0	0	0
App Store	aa581624-2239-425c-9354-cbae0c74322f	grazyya	4/5/22 10:10	Mobile app				en	sa	alrajhi	thanks Alrahji bank, you made it so accesible to your customer. More power	en	thank alrahji bank make accesible customer power	Positive	App Store	0	0	0
App Store	da17e6e3-2a5b-4230-b33e-54952505519c	Shreefah196	4/4/22 7:54	👍				en	sa	alrajhi	Easy to use and very fast and very perfect for doing my things when Iâm in a hurry ððð	en	easy use fast perfect things im hurry	Positive	App Store	0	0	0
App Store	db061db7-9e05-46f9-953f-7a4b52c1cffb	Ezra Mark	2/27/22 13:34	Excellent Mobile App				en	sa	alrajhi	Ease of transaction in the palm of my hand within my convenience. Thank you ðð¼	en	ease transaction palm hand within convenience thank	Positive	App Store	0	0	0
App Store	8635510d-62dd-41da-8e0e-c8113d6b7d3f	Athee_mu	1/23/22 4:01	The best Bank account app in ksa💙💙				en	sa	alrajhi	I hope one day to work with this team. itâs like a dream. I wish someday comes true ððð	en	hope one day work team like dream wish someday come true	Positive	App Store	1	0	0
App Store	0095453a-d94b-471a-9158-90390120f77b	Obabgi	8/14/23 8:23	Great App				en	sa	alrajhi	The best Banking app in the region. Constantly adding new features, Regular updates and user friendlyð	en	best bank app region constantly add new feature regular update user friendly	Positive	App Store	0	0	0
App Store	b5b04c89-9794-43b6-ac1d-7b792c4786c3	MajidNwzk	7/31/23 7:21	Best Application among the KSA Banking Apps				en	sa	alrajhi	To be honest Iâve accounts and applications with other banks but the friendly user is app is only Rajhi. Thanks	en	honest ive account applications bank friendly user app rajhi thank	Neutral	App Store	0	0	0
App Store	f3b6fe3b-a963-4d70-8e40-28d294baee17	akhlaque92	5/31/23 13:28	Best Banking Experience				en	sa	alrajhi	I would like to appreciate & thank you Al Rajhi Bank for providing such extra ordinary online banking services.	en	would like appreciate thank al rajhi bank provide extra ordinary online bank service	Positive	App Store	0	0	0
App Store	8f50b065-0612-4753-b672-65f45f7ec1fe	ARLENESUBIBITILDE	6/2/22 8:47	Excellent service				en	sa	alrajhi	Execellent service as always , all in one hand to do transactions	en	execellent service always one hand transactions	Positive	App Store	1	0	0
App Store	533d038a-7038-419a-8d25-608d82818dfe	OmAnas -Qasem	5/20/22 11:07	Thanks				en	sa	alrajhi	Thanks for my bank More than 30 years as members but no any rewards	en	thank bank years members reward	Neutral	App Store	0	0	0
App Store	1097e0ad-df59-410b-a5ff-7be303d341c0	Horizon212	5/11/22 7:22	Easy effective				en	sa	alrajhi	easy effective app features ððmore effective . New update is so nice easy use excellent	en	easy effective app feature effective new update nice easy use excellent	Positive	App Store	0	0	0
App Store	1f31b984-171d-4d2c-bcd1-8c352b1be28c	asad manzoor lahore	5/9/22 14:28	Nice Really good service I like it world best service				en	sa	alrajhi	Nice service I like to much Alrajhi app Really good experience I recommend this bank	en	nice service like much alrajhi app really good experience recommend bank	Positive	App Store	0	0	0
App Store	5e27809d-d643-41c9-bef4-326e4f7c0a22	Elias N M	5/8/22 6:52	Wonderful and User friendly				en	sa	alrajhi	Wonderful and User friendly	en	wonderful user friendly	Positive	App Store	0	0	0
App Store	d556c483-4b68-4023-af56-d2189abb6503	Adel Alzahrani	5/5/22 15:55	Excellent improvement				en	sa	alrajhi	Faster than ever and faster than others! Alrajhi became really nice	en	fast ever fast others alrajhi become really nice	Positive	App Store	0	0	0
App Store	b584570e-1b5d-4916-b54b-a08b61096c74	Wubeneh	4/29/22 18:53	Transfer				en	sa	alrajhi	It is efficient service and I thank you very much.	en	efficient service thank much	Positive	App Store	0	0	0
App Store	f4a7d440-dea9-48a6-8252-26e816c8b8c5	om dakheel	4/24/22 10:38	Fast and have alot of options easily assessed				en	sa	alrajhi	Fast and have alot of options easily assessed	en	fast alot options easily assess	Positive	App Store	0	0	0
App Store	146dc0a3-bec8-4993-b92b-6e01133490da	Sheikh Moshiee	3/7/22 14:43	Very Very Easy Way				en	sa	alrajhi	such a easier way to transaction in all over the world	en	easy way transaction world	Positive	App Store	0	0	0
App Store	0ccc7f74-57bf-4b51-9dfc-a3594e931ac7	Mohammed Abdul muqtadir	3/7/22 11:13	AlRajhi App				en	sa	alrajhi	It was always a great app and with the new updated one with appearance and performance i like it much. Best exchange rate to India specially with zero transfer fee.	en	always great app new update one appearance performance like much best exchange rate india specially zero transfer fee	Positive	App Store	0	0	0
App Store	0e733ec5-ef0e-430c-9a55-db374fbc5980	ghazi zb	2/23/22 19:15	Friendly				en	sa	alrajhi	Very friendly to use	en	friendly use	Positive	App Store	0	0	0
App Store	b7e4437d-1c7a-4bd1-a7a1-dad21f960373	Paintershow	2/21/22 11:16	Best Bank Application in Saudi Arabia				en	sa	alrajhi	Thank you for your hard work. And please always make the profit margins low for us :)	en	thank hard work please always make profit margins low us	Positive	App Store	1	0	0
App Store	a61e3941-5d03-436e-9ec6-6a11dc547e7f	Amr005674	1/20/22 11:51	Great				en	sa	alrajhi	Its Fast and easy to use hope all banks will be easier to use like this app	en	fast easy use hope bank easy use like app	Positive	App Store	0	0	0
App Store	6589fc71-6c27-412d-b070-b5b70058b207	Abu Sarah 123	1/18/22 13:32	Excellent				en	sa	alrajhi	Excellent Application. Customers no longer need to go to the bank and they rarely need to go to the ATM	en	excellent application customers long need go bank rarely need go atm	Positive	App Store	1	0	0
App Store	73aa3202-7b2f-4d38-ab7a-2fcddd215fb8	eidan49	7/10/23 20:52	Rajhi bank apps				en	sa	alrajhi	Very nice apps and enjoyable and easy , thank you so much Strongly recommend for everyone	en	nice apps enjoyable easy thank much strongly recommend everyone	Positive	App Store	0	0	0
App Store	7d9e3041-7c75-4424-b842-8e55c372a6b4	GeorgeRuh	9/21/23 12:05	Uploading documents still a problem				en	sa	alrajhi	I am trying 6 days now to upload my documents for a pending request and still have âErrorâ on upload.	en	try days upload document pending request still error upload	Negative	App Store	0	1	0
App Store	e59b7f50-975e-43a9-926b-71e2de74579a	faisalzayat	6/15/23 12:13	iPad version				en	sa	alrajhi	Very nice app, I would call that real banking solution - please consider a version for iPad devices.	en	nice app would call real bank solution please consider version ipad devices	Positive	App Store	1	0	0
App Store	ac1bda81-6bd6-4636-81fc-e1c1a5f1aa52	tontaine1	7/10/23 11:58	Dont want to open				en	sa	alrajhi	I m very frustated i need to transfer money urgent but the apply says always :â error try again later!!! Why!??? I put my password but the apply erase it! Now the spply get a new option who donât work I CANT TRANSFER MONEY BECAUSE OF THIS TRANSFERT LIMIT EXCEED OPTION EVEN I CHANGE THE LIMITE AND CALL BANK ACCEPT IT IN THE APY ITS STILL DEMAND TONCHANGE TRANSFER LIMIT OPTION. Erase this optio…	en	frustated need transfer money urgent apply say always error try late put password apply erase spply get new option dont work cant transfer money transfert limit exceed option even change limite call bank accept apy still demand tonchange transfer limit option erase option change bank	Negative	App Store	1	1	0
App Store	de6052da-83f7-430c-a8ea-6932d6d85a79	Almiznab	7/4/23 17:57	Good experience				en	sa	alrajhi	Good intuitive app overall good but some features needs improvement	en	good intuitive app overall good feature need improvement	Positive	App Store	0	0	0
App Store	bff6e88e-1c24-474d-910f-9ee99c2bc428	Yaseenmalik.	5/28/23 20:22	Easy and fast international transaction				en	sa	alrajhi	Thank you al rajhi for making international transactions so fast and easy.	en	thank al rajhi make international transactions fast easy	Positive	App Store	0	0	0
App Store	7c3f8ae1-358b-4f33-ac09-709547755fe6	Int.22	4/30/22 15:09	Local Payment				en	sa	alrajhi	The procedure of beneficiary activation is easy compared to past.	en	procedure beneficiary activation easy compare past	Positive	App Store	0	1	0
App Store	b9d181c4-240b-420e-b15c-c27d6a24422c	amr mnd	11/14/22 13:33	Slow response				en	sa	alrajhi	A bit not user friendly and slow in response	en	bite user friendly slow response	Negative	App Store	0	0	1
App Store	d4753f0f-2f12-4bbc-9d60-76d2f2ab2f0d	A7_NM	5/7/22 13:46	Big improvements				en	sa	alrajhi	There are major improvements. The banking experience has been elevated. Still a long way tho	en	major improvements bank experience elevate still long way tho	Positive	App Store	1	0	0
App Store	b1f63533-fc40-439b-ab7c-748c611c43dd	Sliman1992	4/29/22 13:42	Best Banking App in Saudi!				en	sa	alrajhi	The easiest and smoothest app ever and what I like even more is how they are constantly improving it every time!!	en	easy smooth app ever like even constantly improve every time	Positive	App Store	0	0	0
App Store	7fbf65da-715b-4ce0-b169-1aa4303b34ff	wryuioidhk GA day njg	4/21/22 7:43	Excellent service provider Bank in the world				en	sa	alrajhi	I never seen such services which is provide by Al Rajhi Bank excellent	en	never see service provide al rajhi bank excellent	Positive	App Store	1	0	0
App Store	46807ba0-0ed0-4b31-8c92-a729c39b2371	brazilainmizzy	4/29/22 4:47	New banking app				en	sa	alrajhi	Fast and easy to use ,very user friendly, I donât have no problem at all ,excellent	en	fast easy use user friendly dont problem excellent	Positive	App Store	1	0	0
App Store	470585fd-bc1e-44b4-bc70-f4235e12a827	OM IR	4/23/22 1:20	Bad version				en	sa	alrajhi	Every time when I try do something with app it stuck and makes me restart it again and again ððâ¹ï¸	en	every time try something app stick make restart	Negative	App Store	0	1	1
App Store	0fed9b9f-32c0-45c1-aa0b-2368d1685005	MJailani90	4/17/22 8:59	Best Bank app				en	sa	alrajhi	Quick and any feature you need	en	quick feature need	Neutral	App Store	0	0	0
App Store	3e757fff-78cd-481d-8869-491401fd8da9	#jaan#	4/7/22 15:36	My comment				en	sa	alrajhi	Very fast transaction..high rate and very safe to send money in Philippines..keep up the good work	en	fast transactionhigh rate safe send money philippineskeep good work	Positive	App Store	0	0	0
App Store	0a854287-1de1-44f5-b070-723c4ab487a6	Adnanraza	4/6/22 17:42	Transfer				en	sa	alrajhi	Itâs very easy barcode transfer system just I love that	en	easy barcode transfer system love	Positive	App Store	0	0	0
App Store	f3e31278-07fa-4bb6-969a-d19eb513438b	saloqaibi	3/11/22 14:05	Thank you				en	sa	alrajhi	This is a great application, makes my life easier	en	great application make life easy	Positive	App Store	0	0	0
App Store	d72b162a-3b61-49a1-b90f-042d62b7f799	ALMOSAFFER	2/27/22 13:03	where I am				en	sa	alrajhi	this is a great improvement, now I am proud of my folks..really it touched my feeling positively.	en	great improvement proud folksreally touch feel positively	Positive	App Store	0	0	0
App Store	f278dfa2-a0ab-42a8-8bac-31ea3f6d6518	alstaf	2/17/22 20:27	Wonderful				en	sa	alrajhi	Thank you so much . Very good program. Also easy to use	en	thank much good program also easy use	Positive	App Store	0	0	0
App Store	3c80072b-d159-4b28-9517-e605ad1d9078	Sohail Chaudhary	2/16/22 9:42	Online Banking.				en	sa	alrajhi	No. 1 Online Banking in KSA. Application never crashed nor hanged and it always works fast and smoothly I really love doing banking with Al Rajhi.	en	online bank ksa application never crash hang always work fast smoothly really love bank al rajhi	Positive	App Store	0	1	1
App Store	926610a1-5fcf-4de6-8e13-a562c579d3cb	ybazhair	2/1/22 8:21	Alrajihi Bank				en	sa	alrajhi	Thank you so mush you are the honestest Bank i have ever deal with from my birth till i die and go to my almighty allah	en	thank mush honest bank ever deal birth till die go almighty allah	Positive	App Store	1	0	0
App Store	bb0cd3d0-74ae-4f32-91a2-c275e6952744	kjoharji	1/4/22 8:18	Unique				en	sa	alrajhi	Possibly the best digital banking experience when it comes to apps	en	possibly best digital bank experience come apps	Positive	App Store	0	0	0
App Store	a06f1388-2727-444b-bf66-1aa8cc462823	M.marashdeh	5/24/23 6:48	The New App				en	sa	alrajhi	The old App was more friendly user than the new one	en	old app friendly user new one	Positive	App Store	1	0	0
App Store	3053b7ee-8adf-4818-9dd7-877cc2026016	Xinren1123	7/18/23 11:48	Not good service.				en	sa	alrajhi	Recently i opened a account and my company need iban letter for adding my account to salary payment. I visited 3 times Alrajhi Main branch but still I couldnât get IBAN letter. I got appointment for tomorrow. Itâs wrost customer service i have ever experienced. Hope company will come up to make better customer service.	en	recently open account company need iban letter add account salary payment visit time alrajhi main branch still couldnt get iban letter get appointment tomorrow wrost customer service ever experience hope company come make good customer service	Negative	App Store	1	1	0
App Store	a0387459-af2c-4f1c-829e-ae05e29d0204	Seckwach	5/19/23 13:03	Best bank in the world				en	sa	alrajhi	Thank you Alrajhi your services and everything are really extraordinary	en	thank alrajhi service everything really extraordinary	Positive	App Store	0	0	0
App Store	9c2be73f-2eff-4e87-94b6-f90f15018927	Mowaia sultan	4/29/22 21:17	Al Rajhi beneficiary saving and adding				en	sa	alrajhi	There should be an option for Al Rajhi beneficiary to transfer mony without saving and adding beneficiary account number.	en	option al rajhi beneficiary transfer mony without save add beneficiary account number	Neutral	App Store	0	1	0
App Store	27fc26ea-a793-4711-9f7f-db0ffcf9af74	Dr Mubs	4/27/22 8:40	New Rajhi Mobile App				en	sa	alrajhi	Amazing application,fast and easy to access. No issues	en	amaze applicationfast easy access issue	Positive	App Store	0	0	0
App Store	1576aaf8-024c-4c08-a6b3-1192f245d8a3	Tebogo Senna	4/27/22 6:43	Alrajhi bank app				en	sa	alrajhi	The banking app is very convenient ,easy instructions to followâ¦.good bank card update on the atm..	en	bank app convenient easy instructions followgood bank card update atm	Positive	App Store	1	0	0
App Store	71b53852-0488-4c07-b884-6137892a5619	Abod-10	4/25/22 23:34	Best version yet				en	sa	alrajhi	Better than the previous app	en	good previous app	Positive	App Store	1	0	0
App Store	dd909542-77da-4206-a9c7-d9d6f7fe8eb0	Soulinator	4/25/22 10:51	Very user friendly app				en	sa	alrajhi	Easy to use, reliable and safe	en	easy use reliable safe	Positive	App Store	0	0	0
App Store	f8f1f66c-d7c1-4813-bca0-d42b8225400b	Ammoryvip	3/21/22 15:53	Wonderful application				en	sa	alrajhi	The application is more than expected	en	application expect	Neutral	App Store	1	0	0
App Store	8a283686-d522-4581-abcd-cd347e532a10	qwrfcb gf seyhv	3/17/22 5:44	Convenient				en	sa	alrajhi	Very easy & user friendly	en	easy user friendly	Positive	App Store	0	0	0
App Store	82b7cec8-8d6c-44ae-a34b-e5b712193a75	Jher 🇵🇭	3/3/22 14:48	Excellent				en	sa	alrajhi	Exceptional service I love this bank itâs so easy to use at my convenient time	en	exceptional service love bank easy use convenient time	Positive	App Store	0	0	0
App Store	b4fc617c-0650-4a62-9e99-8ab64b23be19	Dr.Wa'il	3/1/22 10:01	Thank you a lot for your efforts				en	sa	alrajhi	I really appreciate your efforts and your help and your Services	en	really appreciate efforts help service	Positive	App Store	0	0	0
App Store	82239c0b-0bcb-4bdb-866c-91da31457324	fadi fف	2/26/22 0:22	Appreciate				en	sa	alrajhi	Excellent work We can do any thing without waste time on rajhi online app â¦	en	excellent work thing without waste time rajhi online app	Positive	App Store	0	0	1
App Store	8951ac9c-d9fa-440d-aa31-8a95aa56da1c	Moselhi	2/23/22 15:48	I am proud of your service				en	sa	alrajhi	Really nice and very good I appreciate your fast response and fast action	en	really nice good appreciate fast response fast action	Positive	App Store	0	0	0
App Store	0d9acd93-2120-4075-b0c2-d3b072ba8add	لفتي	2/15/22 15:41	Best Banking Services ever				en	sa	alrajhi	Online banking, trading, gold buy/sell all available and easy access	en	online bank trade gold buysell available easy access	Neutral	App Store	0	1	0
App Store	46c85bca-3ea3-4e79-82ee-aa6a212b5530	Satharmon	2/4/22 0:26	Very friendly				en	sa	alrajhi	Good one application and very easy to use.. thank you Super Experience ðð¯	en	good one application easy use thank super experience	Positive	App Store	0	0	0
App Store	61a800f0-224f-4671-9a3d-cf13b7e578aa	mido922020	1/25/22 20:52	Wonderful App				en	sa	alrajhi	The banking services are very simple and easy with the new update	en	bank service simple easy new update	Positive	App Store	0	0	0
App Store	d4a160aa-084a-4aa7-be25-82845dea74d4	Mshmoud Shsker	1/4/22 6:11	App still crashes when I login				en	sa	alrajhi	I canât login to my account because app always crashes, i was removed it and installed again but the problem still has	en	cant login account app always crash remove instal problem still	Negative	App Store	0	1	0
App Store	3e63cde8-76f3-4618-8ac0-dacd8f398e72	Eyad HR	9/19/23 23:59	First in the game				en	sa	alrajhi	Best bank ever in the kingdom that you can find easily even in small towns.	en	best bank ever kingdom find easily even small towns	Positive	App Store	0	0	0
App Store	bb65c989-db06-4af3-bc8d-fafeb9f595c9	AmrKhodair	9/16/23 19:40	Dreams come true				en	sa	alrajhi	You canât imagine or dream of a better service. Congratulations	en	cant imagine dream good service congratulations	Positive	App Store	0	0	0
App Store	a1cc57a8-8738-4de2-bf9f-3e9b04e5d565	Faris Noura	5/20/23 20:56	Wonderful interface				en	sa	alrajhi	The user interface is perfect, i love it	en	user interface perfect love	Positive	App Store	0	0	0
App Store	c00729c4-8b49-45c5-aaec-bed4788d2e7b	what happned hramyo	6/21/23 9:25	Miss Behavior Staff of Al Rajhi				en	sa	alrajhi	Al Rajhi is Good Bank there have all service Good But he staff is third class he behaviors Very third class the dont know How to talk staff I visit Jeddah Al salama Sari road branch there is man Not good guy He Miss behavior nit with me But all customers there have distrub team Of Rajhi please i have reguest Please change your staff of Sari road branch this is ghtya staff there plzzz change	en	al rajhi good bank service good staff third class behaviors third class dont know talk staff visit jeddah al salama sari road branch man good guy miss behavior nit customers distrub team rajhi please reguest please change staff sari road branch ghtya staff plzzz change	Negative	App Store	1	0	0
App Store	70d9017f-5de7-4f30-8210-43fbb59cbb69	Jerome mari	8/28/22 20:03	Transfer				en	sa	alrajhi	So easy and quick and secured	en	easy quick secure	Positive	App Store	0	0	0
App Store	d123da61-c93e-4110-9457-56a75c1a0099	mojisasi	5/8/22 7:40	Nice apps and has no more things to ask for Keep up				en	sa	alrajhi	Nice apps and has no more things to ask for Keep up	en	nice apps things ask keep	Positive	App Store	0	0	0
App Store	f0925a46-c7ec-437d-accb-70165ecf1000	Aaban Bilal	4/30/22 18:01	Easy and Beautiful Design				en	sa	alrajhi	Well Great experience, user friendly beautifully design Love it	en	well great experience user friendly beautifully design love	Positive	App Store	0	0	0
App Store	08cd4d06-c7d9-4acc-93e1-a361456ff954	pichan7	5/2/22 14:09	Thank you				en	sa	alrajhi	There is no icon for main page	en	icon main page	Neutral	App Store	0	1	0
App Store	ae499f88-aa31-4331-97ed-e46eb4a1214d	rehab shaheen	4/26/22 8:49	Very useful and easy to be used				en	sa	alrajhi	Easy and useful usage of applications i love it	en	easy useful usage applications love	Positive	App Store	0	0	0
App Store	b48b2842-f5e4-4255-9f23-df9075f6d55d	reveiew ض	4/28/22 0:59	Logging out automatically				en	sa	alrajhi	sometime there is error it logs out automatically	en	sometime error log automatically	Negative	App Store	0	1	0
App Store	e6261db7-3649-43d9-aa96-d7b1df8cf2a5	jbira	4/22/22 10:37	Exceptionnel app				en	sa	alrajhi	The most amazing useful bank app ever used, designed to anticipate your needs. Rajhi one of the best bank in ksa	en	amaze useful bank app ever use design anticipate need rajhi one best bank ksa	Positive	App Store	0	0	0
App Store	bb218b61-c002-4de5-a845-80065e08ee11	Mohammed3333	4/20/22 11:41	Best Application Ever				en	sa	alrajhi	Everything in the App is great the way of the usage, the color and the speed of activation the recipients.	en	everything app great way usage color speed activation recipients	Positive	App Store	0	0	0
App Store	6cfd56fe-d5dd-4226-b689-986799f0abc3	Fare or care	4/8/22 11:22	Wows				en	sa	alrajhi	I like the improvements the bank working every day	en	like improvements bank work every day	Positive	App Store	1	0	0
App Store	e65e45c6-593c-4a07-96e2-856ad12ad1bf	Zayed59	4/4/22 19:49	Fast transfer				en	sa	alrajhi	Fast and easy transfer	en	fast easy transfer	Positive	App Store	0	0	0
App Store	72418dae-e50f-4918-8cd8-8dec4c6ed832	andie3082	3/31/22 20:42	Very Helpful				en	sa	alrajhi	Thank God for this app, it helps me a lot in transferring money locally and internationally in a convenient, efficient and secured way.	en	thank god app help lot transfer money locally internationally convenient efficient secure way	Positive	App Store	0	0	0
App Store	88f64761-1560-4548-bc75-bf5b1054ad85	Dr.Khalid Waheed	3/31/22 7:54	Excellent and easy to use				en	sa	alrajhi	Among all banks applications, this application is easier and simple.	en	among bank applications application easy simple	Positive	App Store	0	0	0
App Store	94f2a673-36db-456b-a8d3-b4cbcf47f625	حيدر علئ	3/16/22 18:20	Rajhi Mobile Application				en	sa	alrajhi	The App is very easy to use my Experience with the app is wonderful.	en	app easy use experience app wonderful	Positive	App Store	0	0	0
App Store	d81d6d2b-6385-4370-93f1-7d662f517a4b	salomsr	3/5/22 8:59	Fast and efficient				en	sa	alrajhi	Make jobs easier and make life smoother	en	make job easy make life smooth	Positive	App Store	0	0	0
App Store	60c9569b-56a8-4299-878d-788b3a43be77	Abu Hattan	3/2/22 20:09	One of the best				en	sa	alrajhi	Excellent update and looking for more digital services from the biggest Bank in KSA	en	excellent update look digital service big bank ksa	Positive	App Store	1	0	0
App Store	522ebdd9-d7d3-4320-b41e-66badc23e9ec	Aqeel_18	2/3/22 5:57	Great Experience				en	sa	alrajhi	I really appreciate the huge changes that happened to the App	en	really appreciate huge change happen app	Positive	App Store	0	0	0
App Store	6d0ba09a-64b3-46c7-9404-acad778ca9ec	Mido8008	1/20/22 9:47	Well done				en	sa	alrajhi	Smooth and easy to use	en	smooth easy use	Positive	App Store	0	0	0
App Store	4f539634-962a-4b28-9f1d-636481b60fcc	Rishi0636	1/1/22 12:30	International transfer				en	sa	alrajhi	It is reliable & very user friendly.	en	reliable user friendly	Positive	App Store	0	0	0
App Store	3c54ce76-9439-4338-a894-9da5238fdf3d	Basim Khoja	7/10/23 12:11	Best mobile banking				en	sa	alrajhi	By far the best mobile banking experience in Saudi. Snb comes as a far second!!!	en	far best mobile bank experience saudi snb come far second	Positive	App Store	0	0	0
App Store	e6f5265a-982d-4928-bff9-cb54d4326478	ikram.ulla	8/24/23 10:14	Account not working				en	sa	alrajhi	Why my account not working since 26th of June 2023, when I already submitted all required KYC documents. Many times I go to the branch and complain. Also many times I call customer care but still my issue not solved. My 2 monthâs salary in ATM and I need money. What I do?	en	account work since th june already submit require kyc document many time go branch complain also many time call customer care still issue solve months salary atm need money	Negative	App Store	0	1	0
App Store	f19d0790-d5cd-4400-954c-1c5b5c1f758c	Naif.masrohi	5/20/23 19:07	Best online banking app and customer service!!				en	sa	alrajhi	Best online banking app and customer service!!	en	best online bank app customer service	Positive	App Store	0	0	0
App Store	c099683c-d7f9-4d89-9476-aa88275735f5	Kabejja2	10/31/22 18:14	Faster				en	sa	alrajhi	Easier and Faster	en	easy fast	Positive	App Store	0	0	0
App Store	b8294d38-2aab-459d-8edc-971bfa92939c	abdhulraheem	6/19/22 18:24	Good				en	sa	alrajhi	So far I feel happy and satisfied , over all outstanding	en	far feel happy satisfy outstanding	Positive	App Store	1	0	0
App Store	45cfb2b6-dc68-4659-808b-f0f112267c2e	kappoy	5/27/22 4:30	Comment				en	sa	alrajhi	I want the Al Rajhi on line banking , itâs convenient for us , thank you for the good service you provide, God blessâ¦	en	want al rajhi line bank convenient us thank good service provide god bless	Positive	App Store	0	0	0
App Store	f0a936a1-1df8-4efe-8bdc-f7c3af427af1	lovelye boy	5/18/22 12:22	thanks you very simple				en	sa	alrajhi	very is simple transfer Money	en	simple transfer money	Neutral	App Store	1	0	0
App Store	f4d91edd-0459-4e84-a3ec-196fbc52b235	Moha Zaid	4/28/22 23:30	Very smooth application				en	sa	alrajhi	Easy and not complicated	en	easy complicate	Positive	App Store	1	0	0
App Store	0026781f-b972-4883-b966-a60c18ffc07d	ohakami.md	4/28/22 21:26	Great				en	sa	alrajhi	Continuing development of this app makes financial transactions and banking services so much easier.	en	continue development app make financial transactions bank service much easy	Positive	App Store	0	0	0
App Store	f47b6f8c-076c-49b6-9bed-8f8e1897686b	daxbadj	4/9/22 10:54	Useful				en	sa	alrajhi	The app is very useful in all my transactions and make it so convenient.	en	app useful transactions make convenient	Positive	App Store	0	0	0
App Store	3e186f0c-4211-4407-bbc2-451dbe170546	Hamad Saud	4/21/22 20:14	The app not working for iPhone 12 max pro				en	sa	alrajhi	I canât sign in, the window hanging during sign in. I deleted the apps many times and I reinstalled it, even I had update apps version and iOS version as well but it seems there is a bug for specific iPhone models.	en	cant sign window hang sign delete apps many time reinstall even update apps version ios version well seem bug specific iphone model	Negative	App Store	0	1	1
App Store	a6681573-0e11-4dbc-a355-08ce4c43612c	Chichay29	3/27/22 16:51	Thank you				en	sa	alrajhi	Easy to use and accessible	en	easy use accessible	Positive	App Store	0	0	0
App Store	3c4bc254-29f3-4ff5-91f3-7dcea6271a28	mesh555	3/19/22 18:29	Good service				en	sa	alrajhi	More options more customer satisfactions	en	options customer satisfactions	Positive	App Store	0	0	0
App Store	2eaabe6a-1cc9-4a2b-8752-69a2ebed185b	father and more	3/17/22 14:37	Excellent app				en	sa	alrajhi	I like it it faster than old version	en	like fast old version	Positive	App Store	0	0	0
App Store	9278136f-fe06-420b-855e-9854fbeee05a	aziz.zumrawi	3/10/22 11:09	💜				en	sa	alrajhi	Loved this app and it is very easy to use for all of the family	en	love app easy use family	Positive	App Store	0	0	0
App Store	3853f4a3-9562-482a-87a0-85b546d2bcd0	Abo harb	3/1/22 9:01	Good service				en	sa	alrajhi	The app is so fast and easy to use thank you Rajhi bank	en	app fast easy use thank rajhi bank	Positive	App Store	0	0	0
App Store	204186c2-495d-473a-a637-85d5e5581355	abu m omar	2/27/22 9:21	Excellent service				en	sa	alrajhi	I am very much happy with online Banking service Really appreciate it Thanks	en	much happy online bank service really appreciate thank	Positive	App Store	0	0	0
App Store	2a8d38b9-e564-4d9d-91c1-d09853fe4e1d	Drmnf	2/23/22 22:14	Very nice update				en	sa	alrajhi	Thank you for making life easy Very nice update	en	thank make life easy nice update	Positive	App Store	0	0	0
App Store	9fc503cf-4189-466a-acc8-dedd84180ffe	gadahAl	1/14/22 8:18	Nice app				en	sa	alrajhi	Perfect easy to use app, allows you access to all services with a tap.	en	perfect easy use app allow access service tap	Positive	App Store	0	0	0
App Store	aa023a90-7d2d-451f-b20e-533df98154ec	oryomo	1/10/22 13:17	Excellent				en	sa	alrajhi	The application is fast and including on everything!!! Like it	en	application fast include everything like	Positive	App Store	0	0	0
App Store	9073d6db-7bde-43c0-b64f-ed19a7cfabc4	albaraa2010	8/14/23 12:29	Professional Bank				en	sa	alrajhi	Professional and good Bank	en	professional good bank	Positive	App Store	0	0	0
App Store	13db991d-f440-443b-9ba9-de43ad88e153	Krkosh	8/13/23 12:40	Good				en	sa	alrajhi	Good, easy and give you many options and solutions for your money manger	en	good easy give many options solutions money manger	Positive	App Store	0	0	0
App Store	1134e9cf-cd06-4ec8-b259-4f4a85e23428	habbbbbbb i	7/11/23 18:41	Alrajhi Mobile Application				en	sa	alrajhi	Is the best. All banking services are done through it. No hassle and no headache. Just perfect.	en	best bank service do hassle headache perfect	Positive	App Store	0	0	0
App Store	26ce51f7-ad54-43cd-89f8-a205891a836f	MGMK2006	7/13/22 17:30	Update to ios16				en	sa	alrajhi	The app is very useful and easy to use. Kindly update to be compatible with new beta ios 16	en	app useful easy use kindly update compatible new beta ios	Positive	App Store	0	1	0
App Store	63c38ba7-fb5a-484a-b77e-dc74c22c01ad	Azadprince	3/28/23 20:49	International transfer				en	sa	alrajhi	My international transfer not working even sometimes local and Al Rajhi transfer not working i was visiting to bank they make my international beneficiary but i am not done my transfer on my phone?? Plz tell me something	en	international transfer work even sometimes local al rajhi transfer work visit bank make international beneficiary do transfer phone plz tell something	Negative	App Store	0	1	0
App Store	cca067ee-dd7d-4d24-b73b-50a22a6880de	uivvjk	9/27/22 21:20	As usual from bad to the worst				en	sa	alrajhi	The application so difficult to use so hard to login, it had many failures one of them yesterday no one can transfer money. The worst usually comes in big scale not for individuals so not recommended Bank not recommended application.	en	application difficult use hard login many failures one yesterday one transfer money bad usually come big scale individuals recommend bank recommend application	Negative	App Store	1	1	0
App Store	cfda9d66-5e2f-4761-823f-e9aa29ab5f0e	Essam elshazly	5/15/22 6:10	Thank you				en	sa	alrajhi	Thank you very much for your excellent services	en	thank much excellent service	Positive	App Store	0	0	0
App Store	e354685c-0dc1-4b75-bec9-8d3039aad734	Prof.zuhair	4/28/22 12:35	I’m enjoying the service				en	sa	alrajhi	Iâm enjoying using the app, and easy	en	im enjoy use app easy	Positive	App Store	0	0	0
App Store	0b6b3963-4aa2-4f39-98c0-215f7f888712	sss.alharbi	4/27/22 6:47	Good but ...				en	sa	alrajhi	Itâs good but It could be better I think , Face ID password unlock would be fantastic	en	good could good think face id password unlock would fantastic	Positive	App Store	1	1	0
App Store	43029830-47b0-48f3-92b2-da34b762a035	_f4hd	4/26/22 17:06	Best bank app				en	sa	alrajhi	The best bank in general and best bank application in Saudi Arabia. Quick response, beautiful interface, great services.	en	best bank general best bank application saudi arabia quick response beautiful interface great service	Positive	App Store	0	0	0
App Store	c2211349-7c08-46f6-85de-f502e4196ab6	dradelab	4/26/22 8:19	Much improvement				en	sa	alrajhi	Much improvement	en	much improvement	Positive	App Store	0	0	0
App Store	6e8c11bf-f45b-4148-8eac-336e227f338c	BedOInn	4/25/22 17:26	Outstanding service				en	sa	alrajhi	Thank you for the excellent and distinguished banking services provided by Rajhi Bank.	ar	thank excellent distinguish bank service provide rajhi bank	Positive	App Store	0	0	0
App Store	2b594c56-bd1f-4a42-a88c-50201e7f17a2	Khalid Thawab	4/22/22 13:38	Rajhi online banking is the best				en	sa	alrajhi	Easy to use, easy access, instant solutions to lots of services	en	easy use easy access instant solutions lot service	Positive	App Store	0	0	0
App Store	380f9ec2-3646-461b-9e5c-9b284e0714b2	Kjhglkjhg	4/12/22 23:16	Easy and Smooth				en	sa	alrajhi	Amazing app. Easy to use and smooth as well.	en	amaze app easy use smooth well	Positive	App Store	0	0	0
App Store	ef487105-50c2-42f0-88a9-e21ca77658bb	Soooooomaa	4/3/22 11:07	Good				en	sa	alrajhi	Easy to make everything	en	easy make everything	Neutral	App Store	0	0	0
App Store	b0a0d706-507b-40ec-97f0-d3fa9b6913d4	Jourom	3/28/22 17:25	Really nice				en	sa	alrajhi	I have tried so many bank apps and so far alrajhi is the best one.	en	try many bank apps far alrajhi best one	Positive	App Store	0	0	0
App Store	f4a6cde0-be18-41fe-8a40-d94d06b912e0	aa.raiyan	3/15/22 16:01	Transfer amount and fees				en	sa	alrajhi	Transfer amount in receiver side should be in transfer slip including fees.	en	transfer amount receiver side transfer slip include fee	Neutral	App Store	1	0	0
App Store	5d9301e2-e11a-4486-a963-a4221faa361c	Algum72	3/1/22 8:33	Tayeb Algum				en	sa	alrajhi	The service is easy enough and user friendly	en	service easy enough user friendly	Positive	App Store	0	0	0
App Store	809f1ef2-2c7d-4d30-abf6-606f975a4f22	okstatecharm	2/22/22 22:13	Amazing 🤩				en	sa	alrajhi	Theyâre getting better and I love the new updates	en	theyre get good love new update	Positive	App Store	0	0	0
App Store	12835c85-9c45-47ef-95fd-cafb1409379b	Wael m	2/12/22 14:27	Fast !!				en	sa	alrajhi	All you need under your order	en	need order	Neutral	App Store	1	0	0
App Store	36c6a2ec-77e9-403e-9770-233bf1b03a61	Faisal O.	1/19/22 11:53	Seamless experience				en	sa	alrajhi	Amazing app with no major bugs or hick-ups. Overall Iâm very happy with the performanceðð½.	en	amaze app major bug hickups overall im happy performance	Positive	App Store	0	0	0
App Store	2388d3d8-9a06-4205-b9a7-2710e9ba1897	NoorNouman	1/21/22 17:57	Alrajhi is the best of all saudi banks				en	sa	alrajhi	I had 3 year of experience in using different bank accounts the only bank that full all your needs regarding accounts is rajhi bank	en	year experience use different bank account bank full need regard account rajhi bank	Neutral	App Store	1	0	0
App Store	dbb0db52-1ea2-41ce-a9cc-6326c35af720	abdulaziz abdulbadie	1/12/22 19:35	Best banking mobile app				en	sa	alrajhi	Excellent services and user friendly	en	excellent service user friendly	Positive	App Store	0	0	0
App Store	be4d7346-93b8-4201-8ea0-dc80bab0b542	HM0039	1/12/22 11:02	About Application				en	sa	alrajhi	Itâs so helpful Application from Bank. Easy to use Easy to access. Thankâs Al Rajhi Bank.	en	helpful application bank easy use easy access thank al rajhi bank	Positive	App Store	0	0	0
App Store	97574094-7630-4b80-9225-9c6185cf6728	Mub.38	3/29/23 21:14	My Choice				en	sa	alrajhi	The first Bank Account I have in my live, Also I open to my Kids. Best wishes Mubarak	en	first bank account live also open kid best wish mubarak	Positive	App Store	0	1	0
App Store	3c7673c2-a52e-4dd6-803b-7e3682b8598d	Hafiz Muhammad Zubair	8/17/22 17:03	Highly Appreciated & Recommended				en	sa	alrajhi	Enjoying Banking Experience Instant transactions domestic and international Instant log in One of the best bank in Saudi Arabia	en	enjoy bank experience instant transactions domestic international instant log one best bank saudi arabia	Positive	App Store	0	0	0
App Store	4580fa59-634a-4e28-9feb-c28f8714efdf	امير كبيران	3/29/23 7:51	Customer service disappointed				en	sa	alrajhi	I gave negative star â­ï¸very disappointed to send money though international bank to bank need to update full name Arabic. I call customer service they told me go to branch al radji after I go to branch they told me go to tawwel alradji I canât believe the service is bad	en	give negative star disappoint send money though international bank bank need update full name arabic call customer service tell go branch al radji go branch tell go tawwel alradji cant believe service bad	Negative	App Store	1	0	0
App Store	aa25c65f-8bbe-4c1e-a591-9b80bab2567f	Majed Mereb	5/11/22 10:49	Best application ever				en	sa	alrajhi	Excellent by all means, I work in applications and I was really impressed by how simple and practical it is.	en	excellent mean work applications really impress simple practical	Positive	App Store	1	0	0
App Store	dbe4ecd4-bcfc-4c06-b7e6-0e727bab6163	bhok16	5/6/22 11:40	Convenient				en	sa	alrajhi	Easy and convenient	en	easy convenient	Positive	App Store	0	0	0
App Store	8fcf047f-ed15-4669-9f47-09d2749cc1e7	zeus eyes	4/30/22 13:23	Very fast and useful				en	sa	alrajhi	Very fast way to do all your banking stuff	en	fast way bank stuff	Positive	App Store	0	0	0
App Store	e24ef623-34af-4b61-a582-6ae87946a86a	RoniCoy	4/30/22 10:01	Access				en	sa	alrajhi	Easy to access The overview features is great	en	easy access overview feature great	Positive	App Store	0	0	0
App Store	fcb3f8a8-0569-4241-90fe-0d5f573d9099	Mohamed macheda	4/27/22 6:58	Very good bank				en	sa	alrajhi	But the app needs more improvements	en	app need improvements	Neutral	App Store	1	0	0
App Store	8d89ce58-a225-41c2-9f1b-a2cfe31dfced	one that isnt taken plz	4/29/22 19:49	Add feature				en	sa	alrajhi	Could you please add a feature to search/filter transfers by category	en	could please add feature searchfilter transfer category	Neutral	App Store	0	1	0
App Store	733bb371-be55-44c0-bd8d-03a3b77d54fd	-..-0!	4/27/22 11:49	Professional service				en	sa	alrajhi	Providing professional international services. Need to review cars and housing settlement terms and conditions again.	en	provide professional international service need review cars house settlement term condition	Neutral	App Store	1	1	0
App Store	c9944d75-d69d-4762-8445-398bf344b650	malamudi	4/24/22 2:51	App review				en	sa	alrajhi	Q development of Al Rajhi Mobile application is amazing and the future plus the options become great, all the best	en	q development al rajhi mobile application amaze future plus options become great best	Positive	App Store	0	0	0
App Store	ec76776d-7617-4d27-a793-555e74433a91	alsayyari	4/19/22 19:08	Alrajhi App				en	sa	alrajhi	Easy and fast, all services are available in one application	en	easy fast service available one application	Positive	App Store	0	0	0
App Store	37998658-1cf7-465a-883c-c944db49a3ee	Kallungal padam	4/8/22 22:45	It’s very easy to use, thanks Al Rajhi				en	sa	alrajhi	User friendly application, useful for all categories	en	user friendly application useful categories	Positive	App Store	0	0	0
App Store	3878c735-cceb-4226-91fd-1ec0ec399cfa	Abbas.90	4/8/22 12:07	Best banking services				en	sa	alrajhi	Best and easy banking services to use from mobile.	en	best easy bank service use mobile	Positive	App Store	0	0	0
App Store	9596663c-a0a0-40af-a02b-c73a8724a2c4	Reery20	4/4/22 14:16	Excellent				en	sa	alrajhi	Itâs very easy application to use and it helps me to do all the work ððð	en	easy application use help work	Positive	App Store	0	0	0
App Store	b0ebe497-0b78-475d-9849-6a1286892d39	diaa said	4/4/22 14:14	Good Bank				en	sa	alrajhi	Itâs very easy to use and find all required	en	easy use find require	Positive	App Store	0	0	0
App Store	d32f3cc2-68a3-42d1-881a-3dfe4854b61d	Bin Om	3/17/22 19:14	Best				en	sa	alrajhi	Easy to use and more options for me to choose.	en	easy use options choose	Positive	App Store	0	0	0
App Store	ce400f28-de45-4da3-906f-ce026762a3f1	MF4154LM	3/27/22 10:10	Digital Card Issues				en	sa	alrajhi	In app dashboard, or in side menu, upon clicking my digital credit card, the app freezes. I deleted and reinstalled the app but same problem exists. Running it on iPhone X with iOS 15. The app is also updated (4.2.26). Kindly fix the issue.	en	app dashboard side menu upon click digital credit card app freeze delete reinstall app problem exist run iphone x ios app also update kindly fix issue	Negative	App Store	0	0	1
App Store	ed2900d2-bc42-4c43-b7ec-c090fd9bcd9b	Mansour Almisfer	3/12/22 13:26	Great enhancement				en	sa	alrajhi	I liked the new enhancements of the App and the new look and feel.	en	like new enhancements app new look feel	Positive	App Store	1	0	0
App Store	9a751b0c-56bd-4774-b7d2-3c79681ff1c5	faisalal3amri	2/23/22 22:06	Good update				en	sa	alrajhi	New update is well designed and easy to use.	en	new update well design easy use	Positive	App Store	0	0	0
App Store	225e0c88-ebf2-4b8d-8048-f30e18a8471c	Khalid Salman Alfaifi	2/1/22 17:43	Faster than before				en	sa	alrajhi	Faster than before	en	fast	Positive	App Store	0	0	0
App Store	85f30640-e0c8-4569-bc1e-fddf403b1a1b	Saeed Balhareth	1/17/22 13:19	Love the app				en	sa	alrajhi	The best bank ever easy to use for own personal transactions thanks a lot	en	best bank ever easy use personal transactions thank lot	Positive	App Store	0	0	0
App Store	d65094d4-9b18-4c9e-8473-b2116e8d2e4b	kashifahmadtaran	9/5/23 12:40	App restart problem				en	sa	alrajhi	I open mu alrajhi app auto restart how to fix	en	open mu alrajhi app auto restart fix	Negative	App Store	0	1	0
App Store	56ecd5d0-3195-493e-aa74-0400b3d7a65f	$The Place 2 B$	5/13/22 8:58	Enjoying the online experience				en	sa	alrajhi	One of the best online banking apps	en	one best online bank apps	Positive	App Store	0	0	0
App Store	f90b0393-fe1e-4b9e-8a58-bec82f0e3f01	Hatem al	9/26/22 12:54	Very poor				en	sa	alrajhi	Since a few weeks, every time I open the application the first time got hang then I need to force close it and re-open it again It happens every day even after multiple updates	en	since weeks every time open application first time get hang need force close reopen happen every day even multiple update	Negative	App Store	0	1	1
App Store	3b15e8f0-973f-448e-afe1-2593cc3b61e0	xahiir	4/28/22 2:31	Best app				en	sa	alrajhi	This is the best banking app I have used ever. Please allow to add international beneficiaries through the app as well.	en	best bank app use ever please allow add international beneficiaries app well	Positive	App Store	0	1	0
App Store	0308f74c-978e-47a4-bc61-1d81add131a3	b hi jfcvssxb	4/16/22 0:07	Thanks				en	sa	alrajhi	Thanks for everything you are the best bank	en	thank everything best bank	Positive	App Store	0	0	0
App Store	98207f3c-ea3b-488a-9e0e-44f8f106012e	tar.em	3/27/22 10:49	best service				en	sa	alrajhi	best service, I love every update they make. Theyâre very detailed in what they do	en	best service love every update make theyre detail	Positive	App Store	0	0	0
App Store	aeaeca0f-b60f-474c-88b4-1ebc7538890b	Riyas kakkazhom	3/14/22 7:37	Excellent				en	sa	alrajhi	Amazing banking experience any bills pay fast thank you...	en	amaze bank experience bill pay fast thank	Positive	App Store	0	0	0
App Store	83286f04-d79f-4f0b-9285-2799b6c76a59	myaphets	3/19/22 1:28	Please				en	sa	alrajhi	I hope they have cashback on international transfer and purchasing online	en	hope cashback international transfer purchase online	Neutral	App Store	0	1	0
App Store	57677d8d-f7d2-4fad-a229-2ac46e0e61a6	Hat1969	3/13/22 15:31	Easy and convenient				en	sa	alrajhi	It is easy to use.	en	easy use	Positive	App Store	0	0	0
App Store	13a25ab9-95fc-4aed-906b-5c5a8b3e96d8	ام يوسف وراكان	2/17/22 8:56	Thank you				en	sa	alrajhi	Very easy and well designed App	en	easy well design app	Positive	App Store	0	0	0
App Store	0c92a87f-42df-4e0f-8ee7-651bbfea5023	Talha sani	2/24/22 8:16	Great work				en	sa	alrajhi	Excellent service from Rajhi bank always friendly service	en	excellent service rajhi bank always friendly service	Positive	App Store	0	0	0
App Store	840fc9f5-1a72-4fa9-b9a4-d7cd2ddc12cf	Ali Itrat	2/14/22 10:01	Great				en	sa	alrajhi	Other banking apps should also be like this.	en	bank apps also like	Neutral	App Store	0	0	0
App Store	90403833-08b7-42e8-b4d6-efcf9a04829c	Miss_Naddo	1/24/22 15:33	Useful				en	sa	alrajhi	Itâs making transferation easier	en	make transferation easy	Positive	App Store	0	0	0
App Store	5a92f9bb-1243-4580-a066-6ebd72a014d5	SAsa051067	11/29/22 4:47	Outstanding application				en	sa	alrajhi	Very good service Quick Simple Enjoyable	en	good service quick simple enjoyable	Positive	App Store	0	0	0
App Store	33b0352c-98b9-410a-84d9-f2db2a9912c9	Besoo_32	4/30/22 11:08	Great Service				en	sa	alrajhi	Iâm so thankful to have this app itâs makes my life easier .	en	im thankful app make life easy	Positive	App Store	0	0	0
App Store	394004a2-32ce-4db4-b811-c2085ecaa0e5	Hussein Serhan	4/28/22 7:33	Excellent app.				en	sa	alrajhi	Itâs significant app and itâs also easy to be used so friendly Thank you Hussein Alkahtani	en	significant app also easy use friendly thank hussein alkahtani	Positive	App Store	0	0	0
App Store	81722837-6907-4996-b228-8fa2861493d3	Aryan535	4/22/22 18:50	Awesome				en	sa	alrajhi	If i send my friends money to Pakistan, then the bank will investigate that Personâ¦ please reply	en	send friends money pakistan bank investigate person please reply	Negative	App Store	0	1	0
App Store	e735138e-f14e-4da0-b335-c5a31337e6fa	madzfai	4/28/22 0:52	Software bugs				en	sa	alrajhi	This new version has lot of software bugs. It will hung and will log out immediately even though i just log in my account. Canât even view the status of my credit card.	en	new version lot software bug hang log immediately even though log account cant even view status credit card	Negative	App Store	0	1	1
App Store	ed143102-b1c5-4122-b949-2d633576387e	Mohamed shebl Hashim	4/17/22 14:01	Good application we wait more than that				en	sa	alrajhi	Good application we wait more than that	und	good application wait	Positive	App Store	1	0	0
App Store	bc5a948f-aff7-4b40-bed2-72ccbff41366	b..3404	3/18/22 14:07	Great improvements				en	sa	alrajhi	I like it more and more wishes for more improvements	en	like wish improvements	Positive	App Store	0	0	0
App Store	87654632-6c3e-4d16-a425-38711fb377d0	qrrfd	3/27/22 15:37	Suggestion				en	sa	alrajhi	It is not possible to know the exact amount charged at the time of transaction time	en	possible know exact amount charge time transaction time	Negative	App Store	0	1	0
App Store	8076a95c-6d72-441e-a525-399963b4b2b3	zmsheikh	3/16/22 4:59	Love the new updates				en	sa	alrajhi	Works well. Makes life easy.	en	work well make life easy	Positive	App Store	0	0	0
App Store	351af6c7-a832-432d-b3f5-b8ded1ba7b51	ansi11225500	3/4/22 7:42	User friendly App				en	sa	alrajhi	Best one bank app and bank services I ever experienced.	en	best one bank app bank service ever experience	Positive	App Store	0	0	0
App Store	abdf1959-aa20-4d8f-8542-a0d8b8167be3	4R13S ♈️	3/11/22 4:34	App not working				en	sa	alrajhi	I updated the latest version 5.0.0 last night, unfortunately it is not working due to some system errors. I should have not updated to this version. Hope they check this ASAP.	en	update late version last night unfortunately work due system errors update version hope check asap	Negative	App Store	0	1	0
App Store	b373a9d6-93e4-42d5-9970-93263a1c31e0	Abdullah Sayer	1/25/22 11:18	Extraordinary self services				en	sa	alrajhi	Extraordinary self services please keep updating the app with good features.	en	extraordinary self service please keep update app good feature	Positive	App Store	1	0	0
App Store	006a98aa-7a01-42a3-9f53-ba9e5ff142f9	Abo Naif3	1/12/22 13:45	Without asking				en	sa	alrajhi	Dont make me give a review without asking	en	dont make give review without ask	Negative	App Store	0	1	1
App Store	819f460a-e95b-4885-8481-cbb65c1fb704	S_H_1982	8/27/23 17:12	User friendly app				en	sa	alrajhi	Very easy to use and amazing!	en	easy use amaze	Positive	App Store	0	0	0
App Store	a225db6f-d07d-458d-94a3-ca32e4f7d503	SMSA08	6/28/23 11:09	Best banking app ever				en	sa	alrajhi	One of the best applications in terms of user interfaces, lack of issues and ease of use	en	one best applications term user interfaces lack issue ease use	Positive	App Store	1	1	0
App Store	d18ba2a8-b0be-4c97-b81d-9adb3b7b52a0	Ali plus Ayesha	7/17/23 15:09	Again App design changed				en	sa	alrajhi	Every month changing App design, Menu change, icons change, order change, tabs change. And you will have to surf 1 hour to find it when you need to do anything in the app.	en	every month change app design menu change icons change order change tabs change surf hour find need anything app	Neutral	App Store	1	0	0
App Store	2b6b404b-8143-4e09-b960-28c140f422b7	Arif A. S	5/20/23 17:15	Top banking services				en	sa	alrajhi	Top banking services finds you multiple solutions	en	top bank service find multiple solutions	Positive	App Store	1	0	0
App Store	1a58d7fe-81b8-435d-bbe5-0df26559431e	tah.kh	5/19/23 21:40	Professional experience				en	sa	alrajhi	My best Bank application	en	best bank application	Positive	App Store	0	0	0
App Store	4c3f1217-0546-4b3d-a129-8e235ff96adf	Baabdullah	2/16/23 19:02	Great experience				en	sa	alrajhi	Thank you to makes it smarter.. keep going	en	thank make smart keep go	Positive	App Store	0	0	0
App Store	3b5df093-dba0-4472-9373-cae180bcf873	shefnoor	9/12/22 7:02	Easy handling				en	sa	alrajhi	Short process	en	short process	Neutral	App Store	1	0	1
App Store	a1969f56-e210-4dfe-a9f6-3389ae7e0850	Mohammmad Helal	8/18/22 15:42	Very good service most honest bank				en	sa	alrajhi	Good service honest bank	en	good service honest bank	Positive	App Store	0	0	0
App Store	cb9b27f6-6f23-47b3-9f19-1943f0c0e67d	Salman Alfarisi	8/21/22 10:55	App. Stops suddenly right after starting				en	sa	alrajhi	Many times the app., after putting the id and password and OTP, before stating â¦ it stops and logs out.	en	many time app put id password otp state stop log	Neutral	App Store	0	1	0
App Store	3245132c-a49f-47bc-9f6c-d03ff5223a29	Mohammad Fakhrul	6/23/22 7:14	Hi				en	sa	alrajhi	It really great experience dealing with Alrajhi bank Thanks so much to each and every members of Al Rajhi bank , Much much appreciated ððð Keep it up ð	en	really great experience deal alrajhi bank thank much every members al rajhi bank much much appreciate keep	Positive	App Store	0	0	0
App Store	a51dda81-e0c8-465a-9309-1109f2ed3325	ibn fatima	5/9/22 8:52	Very good				en	sa	alrajhi	The app is very easy to use, bank transactions at fingertips!	en	app easy use bank transactions fingertips	Positive	App Store	0	0	0
App Store	f50eb39d-4b23-46ec-a905-d099eac21743	khubaib ( Abu Sidra )	5/7/22 6:50	All the best				en	sa	alrajhi	Very easy and useful for everything	en	easy useful everything	Positive	App Store	0	0	0
App Store	e8f31cbd-f883-4a3b-b8fe-faba9d99dbe4	M.ali hassan	5/5/22 12:49	New user				en	sa	alrajhi	Easy and very user friendly	en	easy user friendly	Positive	App Store	0	0	0
App Store	37b3f222-191b-48a8-9582-8734f7a5051f	Eng A HUSSIN	4/29/22 16:02	Good				en	sa	alrajhi	The new version much improved services	en	new version much improve service	Positive	App Store	1	0	0
App Store	df74d38c-2ed1-417a-9669-2d501f546f2e	Atteya_m	4/27/22 8:58	Al Rajhi Mobile				en	sa	alrajhi	This is the best online banking I have ever experienced. Itâs super fast, easy, and reliable.	en	best online bank ever experience super fast easy reliable	Positive	App Store	0	0	0
App Store	2f3c658d-f395-4e6b-a71f-2d3cf5a4f60c	aziz skt	4/17/22 10:38	Facilities				en	sa	alrajhi	Bank alrajhi has meet the current requirements of technology for easing banking for their customers. Thank u alrajhi	en	bank alrajhi meet current requirements technology ease bank customers thank u alrajhi	Positive	App Store	0	0	0
App Store	76339a22-f074-488e-9f16-73801290bc26	Mohamed_33	4/9/22 11:06	Very good experience indeed				en	sa	alrajhi	App was made good and many options such as phone topup	en	app make good many options phone topup	Positive	App Store	0	1	0
App Store	dbc53db7-0ed1-45fe-a1ae-04441ae3c7e0	Sulaimanali	3/19/22 15:16	Best bank mobile app				en	sa	alrajhi	It is easy, fast and handy	en	easy fast handy	Positive	App Store	0	0	0
App Store	f2f14885-a671-4a68-bbc2-e0195892a717	ElChabibti	3/27/22 6:52	Getting a hold of an online agent is a nightmare				en	sa	alrajhi	The app is wonderful. Finding a human to approve a credit card transaction you are trying to authorize is impossible.	en	app wonderful find human approve credit card transaction try authorize impossible	Positive	App Store	1	1	0
App Store	c6b063a4-0123-44a0-985e-4d458d25d944	Hassan Alshdaiyd	3/17/22 7:41	Service evaluation				en	sa	alrajhi	This is one of the best experiences of banking, itâs easier and better	en	one best experience bank easy good	Positive	App Store	0	0	0
App Store	add97857-352e-4e38-a9bb-2d2cdb4999b0	The Dvil ray	3/13/22 16:48	Better than it was				en	sa	alrajhi	Easy to use, great job	en	easy use great job	Positive	App Store	0	0	0
App Store	7e3d2fd9-9fba-44ae-b72c-91e4be0e5f9a	Bandar D	3/12/22 15:04	Great application				en	sa	alrajhi	Thanks for the development has been done	en	thank development do	Positive	App Store	0	0	0
App Store	a4be5ec5-7cb0-4749-a59c-1875af570858	bvfhdifjfnf	3/3/22 7:51	Log in problem				en	sa	alrajhi	Some times i cant log in	en	time cant log	Neutral	App Store	0	1	0
App Store	c45bbebb-b6e8-4bdb-ab37-e5d0134fdfa1	Angelbibin	2/27/22 6:06	alrajhi bank app				en	sa	alrajhi	Alrajhi bank application is easy and convenient to use	en	alrajhi bank application easy convenient use	Positive	App Store	0	0	0
App Store	b764c495-67cd-43ea-82d6-c2eb5b099d27	dr_brightness	2/21/22 8:04	Make your life easier				en	sa	alrajhi	Decent design for multipurposes	en	decent design multipurposes	Positive	App Store	0	0	0
App Store	0c46622a-875c-4c74-a736-d45b2bbc8298	Mahmoud_213	2/1/22 9:09	Good service				en	sa	alrajhi	Al Rajhi app is the best app to me itâs so smooth but the bank isnât lol so I prefer using the app mostly	en	al rajhi app best app smooth bank isnt lol prefer use app mostly	Positive	App Store	0	0	0
App Store	721c64b0-7eb5-42a5-8a15-a0b9d885c6e6	Saad1984	2/1/22 8:37	First bank				en	sa	alrajhi	The first banking in online service	en	first bank online service	Neutral	App Store	0	1	0
App Store	bcd396cd-56da-49c7-8d52-87c54bc4be95	dawie wayway	8/29/23 20:37	Best banking services app				en	sa	alrajhi	I have many apps on banking services, but Alrajhi is the easiest, fastest, efficient one yet!	en	many apps bank service alrajhi easy fast efficient one yet	Positive	App Store	0	0	0
App Store	cd2bad12-b870-4385-8a4f-b6af5816da5a	leilaco	6/8/23 15:37	App				en	sa	alrajhi	Very convenient and easy to access	en	convenient easy access	Positive	App Store	0	0	0
App Store	1ebadf2d-123a-4149-b281-0f3ef61befcf	navassadafco	5/8/22 13:37	Fast and efficient service				en	sa	alrajhi	Number one service in Saudi Arabia	en	number one service saudi arabia	Neutral	App Store	0	0	0
App Store	d0bf5be2-596a-4acc-909e-b2e4c089b7e1	mohammed user	5/9/22 19:39	Updating issues				en	sa	alrajhi	This application after the last update itâs going to be so bad i canât log in sometimes and i canât transferring money pls you are a big bank thatâs a lot of nerve i heat putting my money at your bank anymore	en	application last update go bad cant log sometimes cant transfer money pls big bank thats lot nerve heat put money bank anymore	Negative	App Store	1	1	0
App Store	968e2da4-f00a-4aa8-b654-c62ed03d800e	A A Ahmad	4/27/22 6:42	You guys are working hard,,, great job				en	sa	alrajhi	You guys are working hard,,, great job	en	guy work hard great job	Positive	App Store	1	0	0
App Store	0f689c47-4b00-4c70-aec9-c1237bfceb96	Aziz Al Madani	4/26/22 11:55	ARB App				en	sa	alrajhi	Please fix the issues in bills payment I canât amend or delete the beneficiaries ???	en	please fix issue bill payment cant amend delete beneficiaries	Negative	App Store	0	1	0
App Store	d5f1f7ae-df79-473f-9397-eafe0254a16e	moeeldaw	4/23/22 14:40	Excellent service and performance				en	sa	alrajhi	Easy to used and Excellent UI	en	easy use excellent ui	Positive	App Store	0	0	0
App Store	967d0457-d6d7-4d99-92ac-7d155c30dbe9	altalbe	4/20/22 21:46	Much better				en	sa	alrajhi	I enjoy the functionalities of the new app	en	enjoy functionalities new app	Positive	App Store	0	0	0
App Store	2bc07a4c-8e64-4b2a-82d6-ccb8544efcf4	Mahmo. El Gabry	4/20/22 3:21	Excellent				en	sa	alrajhi	System perfectly	en	system perfectly	Positive	App Store	0	0	0
App Store	921886a0-c692-412d-ae9c-8af563db9234	Abou Labeed	4/19/22 0:07	Thank you				en	sa	alrajhi	Thank you for the distinguished services	en	thank distinguish service	Positive	App Store	0	0	0
App Store	4e231f8f-0c8d-4a6c-9b76-2e049e18bb3a	Halamezy	4/17/22 9:26	Bery interested				en	sa	alrajhi	Very interested update program	en	interest update program	Positive	App Store	1	0	0
App Store	782232bc-c8e1-4951-8b7a-77e179ccf2f3	Im_nouf	4/15/22 22:28	High				en	sa	alrajhi	High quality of service	en	high quality service	Positive	App Store	0	0	0
App Store	95b240b5-ed3c-4f62-bd2f-32373d39722d	deejayboi	4/3/22 10:11	Good service				en	sa	alrajhi	Fast and easy to use	en	fast easy use	Positive	App Store	0	0	0
App Store	4c1b3fd4-cd0f-4b2c-bdef-d2217cb7ba74	Abdulhafeez Ghari	3/23/22 21:40	Easy & fast				en	sa	alrajhi	So easy to navigate through the app. Thanks for the amazing app ðð»	en	easy navigate app thank amaze app	Positive	App Store	0	0	0
App Store	0b88cfba-c0a8-49a7-ac8b-4b2cd11a139e	Monjural Hasan	3/19/22 6:29	Good service				en	sa	alrajhi	User friendly and good service	en	user friendly good service	Positive	App Store	0	0	0
App Store	cbd9a81a-aa5c-4b8e-a5d2-7ea045578899	JSA_2022	3/22/22 14:57	Can not use application!				en	sa	alrajhi	Now one week after update? Couldnât use this application! It is not working and canât go to my account, just blank screen come! Waiting action !	en	one week update couldnt use application work cant go account blank screen come wait action	Negative	App Store	0	1	0
App Store	a9ad507e-b3ca-42cf-9ea3-6db4c179f68d	yakuuiiiiiuuuuuuu	2/19/22 19:39	Easy and fast				en	sa	alrajhi	Easily transfer,add new beneficiary simple and fast.	en	easily transferadd new beneficiary simple fast	Positive	App Store	1	0	0
App Store	6661ddd4-2605-4216-b565-daf055ff3d41	Ibrahim Al-Oudah	2/1/22 9:36	Best mobile App A+				en	sa	alrajhi	The best mobile application for banking services I have ever used.	en	best mobile application bank service ever use	Positive	App Store	0	0	0
App Store	f4c4d49e-4f6d-4ba3-82bf-b02944f74665	khurram aslam	1/31/22 6:22	Funds Transfer				en	sa	alrajhi	Its fast, easy reliable	en	fast easy reliable	Positive	App Store	0	0	0
App Store	7864c32e-6f79-45d9-8835-234c67dc7b0c	zainalabed	6/22/23 8:27	Very good				en	sa	alrajhi	Very easily transfer to account. I m happy with this Bank. Thanks	en	easily transfer account happy bank thank	Positive	App Store	0	0	0
App Store	a6bd7859-ba7f-4ec6-969b-d4107ee8260c	SC: Yua339	5/24/23 10:09	Amazing App				en	sa	alrajhi	I believe perfect app... And getting better and better everyday	en	believe perfect app get good good everyday	Positive	App Store	0	0	0
App Store	94792da1-1e2d-4342-8ac3-46fb37f4611f	jethuke	10/28/22 12:21	Really appreciate Al Rajhi Bank service thank you!				en	sa	alrajhi	Really appreciated Al Rajhi Bank support and service thank you!	en	really appreciate al rajhi bank support service thank	Positive	App Store	0	0	0
App Store	16b0d9d2-4777-4f46-ad54-5caa0927cef6	aa_ny	7/3/22 15:02	Very easy to use				en	sa	alrajhi	Very helpful and time saving	en	helpful time save	Positive	App Store	0	0	0
App Store	536cfd75-350f-4aaa-91c7-46e95f0f4dcd	el doctooor	5/14/22 7:30	A				en	sa	alrajhi	Better app easy reach services	en	good app easy reach service	Positive	App Store	0	0	0
App Store	1828dce9-21c7-4e39-ab02-0042c93468f4	Sa......................	6/16/22 17:51	Hate the new 3D icons				en	sa	alrajhi	The new 3D icons look so bad. Please change to whatever we had before.	en	new icons look bad please change whatever	Negative	App Store	1	0	0
App Store	0d8f8b60-6feb-401f-acc1-9ea008fa2a5e	hq19861986	4/26/22 10:14	Awesome				en	sa	alrajhi	Perfect Many options Easy to use	en	perfect many options easy use	Positive	App Store	0	0	0
App Store	fa972065-e332-44ba-82db-badbd75b119d	Wafu of Manila	4/26/22 7:48	Wow! Looking forward for more advance features				en	sa	alrajhi	Wow! Looking forward for more advance features	en	wow look forward advance feature	Positive	App Store	0	0	0
App Store	20b050af-0acb-4a4e-9f7d-a8c8baae9a0d	GreatOfNajed	4/24/22 20:22	He deserves 5 stars				en	sa	alrajhi	Easily you can add new accounts	en	easily add new account	Positive	App Store	0	1	0
App Store	74571b5a-ddec-4811-b27b-9262992960bc	Shazsal93	4/24/22 20:10	The Best App Ever!!!!				en	sa	alrajhi	Love this application from Alrajhi, very useful and virtually eliminated my boring visits to the bank branch, this is the digital era and Alrajhi seem to believe in this.	en	love application alrajhi useful virtually eliminate bore visit bank branch digital era alrajhi seem believe	Positive	App Store	1	0	0
App Store	36227306-3b4e-4f75-9a2e-68729f80f703	Omaireen	4/20/22 9:12	Thanks for this benefit website				en	sa	alrajhi	Excellent website	en	excellent website	Positive	App Store	0	0	0
App Store	16796d57-2170-48c3-b86f-913e50f37d37	NotimeTogoOut	4/12/22 23:21	Efficient				en	sa	alrajhi	Efficient, safe and convenient way of transferring money.	en	efficient safe convenient way transfer money	Positive	App Store	0	0	0
App Store	30bc7288-6484-4131-bf9e-a3795617f156	Mondo7070	4/19/22 16:12	I like the old expense vs savings diagram				en	sa	alrajhi	It used to show a great comparison but not anymore. I hope it gets back	en	use show great comparison anymore hope get back	Negative	App Store	1	0	0
App Store	c1834efa-1a2a-455e-957a-52b54365d3cb	Mahmoudena	4/7/22 13:07	Great				en	sa	alrajhi	The application have all what I need before itâs become a great app	en	application need become great app	Positive	App Store	1	0	0
App Store	1a5f15be-0430-4823-99c0-45e756bd23f4	N Akhter	4/5/22 7:46	Very easy to banking..too much happy				en	sa	alrajhi	I am very much satisfied	en	much satisfy	Positive	App Store	0	0	0
App Store	00d063c1-a63d-4b2d-8f9f-69ae86d81dee	خفوا علينا بالدعايات	3/29/22 2:53	Easy App				en	sa	alrajhi	easy app and clear to find what you need thank you Al Rajhi Bank for Al Rajhi Mobile	en	easy app clear find need thank al rajhi bank al rajhi mobile	Positive	App Store	0	0	0
App Store	3b2895c7-2203-4f7c-803a-2277c1815c6c	soosan0078	3/30/22 13:56	Well done				en	sa	alrajhi	The app is going to be perfect but the crashing during login need serous attention	en	app go perfect crash login need serous attention	Negative	App Store	0	1	0
App Store	0fbaf36c-33be-43a6-95b8-75524f63be76	Yasser Yousry	3/29/22 1:49	Eng				en	sa	alrajhi	It is very easy and saved our time	en	easy save time	Positive	App Store	0	0	0
App Store	90496e03-077f-47ad-ae82-f033ee0f2368	mssayad	2/27/22 4:06	Excellent service				en	sa	alrajhi	Fast and reliable	en	fast reliable	Positive	App Store	0	0	0
App Store	a1b029c2-1561-474a-b5bd-9c08374f91f8	Salimpbvr	2/9/22 21:52	New look easy to use , proud i am a Rajhi family				en	sa	alrajhi	New look easy to use , proud i am a Rajhi family	en	new look easy use proud rajhi family	Positive	App Store	0	0	0
App Store	d12fa58e-5fec-40ca-91bd-b5130eddd799	RJ Linte	2/3/22 5:10	RJ				en	sa	alrajhi	I hope the otp always safe and reliable and cannot be hack	en	hope otp always safe reliable hack	Positive	App Store	1	0	0
App Store	2484c916-dc35-4235-897f-50a76acf2de0	apasjunior	1/27/22 6:20	Very satisfied				en	sa	alrajhi	The best way to send money. Secure and very convenient. I recommend this apps.	en	best way send money secure convenient recommend apps	Positive	App Store	0	0	0
App Store	90134c53-9697-4c47-8589-e4495d3464bd	aminkhan11	1/12/22 8:05	Good experience				en	sa	alrajhi	Week ago start using alrajhi app literally amazing experience, good job alrajhi	en	week ago start use alrajhi app literally amaze experience good job alrajhi	Positive	App Store	0	0	0
App Store	6d09ebb8-fe24-41a1-b983-3d2f7767709a	ZEPULOQA	6/13/23 6:22	Experience				en	sa	alrajhi	Always enjoyed and having great experience of banking with Al rajhi bank	en	always enjoy great experience bank al rajhi bank	Positive	App Store	0	0	0
App Store	105ede26-75e5-4f61-8efb-fe503b8b37f5	shoghor	6/11/23 3:27	Transaction				en	sa	alrajhi	Al Rajhi all the best I am using for transfer money to families from 30 years Ok â Thank	en	al rajhi best use transfer money families years ok thank	Positive	App Store	0	0	0
App Store	d115a782-3af4-43c2-ad96-1e69c1598cc4	Ossama Elsayed	10/16/22 7:01	Great and smooth				en	sa	alrajhi	Facing no issues, smooth, nice themes feature.	en	face issue smooth nice theme feature	Positive	App Store	1	0	0
App Store	6bcbf3b1-e014-4cc0-ba9c-fc553c1076b0	Nashparo2	5/15/22 8:15	Wonderful				en	sa	alrajhi	Fast, simple to use and very reliable great app.	en	fast simple use reliable great app	Positive	App Store	0	0	0
App Store	ced12c36-5d50-4986-ae6a-b9e0dd0170b8	dr.saad_alqarni	9/23/22 7:33	Notice				en	sa	alrajhi	Last update whenever there is money transfer, the application crashes immediately and exit to the main screen	en	last update whenever money transfer application crash immediately exit main screen	Negative	App Store	0	1	0
App Store	7fbb400c-8aed-44ef-9fb6-6f533e2de5d8	Eng. Zizo	4/26/22 18:29	Excellent				en	sa	alrajhi	The Best Bank Application Excellent Application compared to another bank applications	en	best bank application excellent application compare another bank applications	Positive	App Store	0	0	0
App Store	f1abe6d2-fe71-42ad-8b73-3a20b03f4ccb	murmara	4/28/22 22:16	Good, friendly use				en	sa	alrajhi	I guess Alrajhi Bank degital services and devices applications are in need of improvement and they need to pinch mark with the top similar institutions locally. Please try to get in the pace for the top locally and then globally!	en	guess alrajhi bank degital service devices applications need improvement need pinch mark top similar institutions locally please try get pace top locally globally	Neutral	App Store	1	0	0
App Store	b54df1f4-3ccc-43e1-a6b4-3661a25a395d	Mns989	4/18/22 21:24	Good				en	sa	alrajhi	Better than before	en	good	Positive	App Store	0	0	0
App Store	e3324bfb-4a05-44de-811f-31606922b4b5	nasifpk	4/16/22 18:37	Great bank service				en	sa	alrajhi	Best service provide , like to be the customer of Alrajhi	en	best service provide like customer alrajhi	Positive	App Store	0	0	0
App Store	0ac2f81c-3d18-48b7-9aa6-92e6c11426f7	Medhat MKS	4/8/22 14:13	The best banking app ever				en	sa	alrajhi	Thank you Al Rajhi for doing this app, you made our life easier! All the best.	en	thank al rajhi app make life easy best	Positive	App Store	0	0	0
App Store	9f555c2f-2432-4d7d-866a-66422cd3eccf	samar-moon	4/6/22 10:10	It need to be easier				en	sa	alrajhi	Some times doesnât work quickly	en	time doesnt work quickly	Negative	App Store	0	1	0
App Store	50600375-b824-408c-8c02-89f9563a665d	susu buk	2/21/22 5:28	Value				en	sa	alrajhi	The best bank and easy transactions	en	best bank easy transactions	Positive	App Store	0	0	0
App Store	7e2e4332-7c7c-4019-acd2-00e883fcf1c9	حرف الـ(ظ) يجمعنا	2/18/22 21:07	Thank you				en	sa	alrajhi	Thank you for good service	en	thank good service	Positive	App Store	0	0	0
App Store	c4133a8e-506b-42cd-a948-31151b763e3f	chan is 5	2/14/22 9:43	Amazing				en	sa	alrajhi	Iâve never seen something like it. It is perfect.	en	ive never see something like perfect	Positive	App Store	1	0	0
App Store	4046c1ec-dfbb-449d-867a-e7e6c62c1d3c	bader1999999	2/4/22 18:31	evaluation				en	sa	alrajhi	Good service from the bank	en	good service bank	Positive	App Store	0	0	0
App Store	f27c9087-4475-41de-ab01-60d11f3fe7b9	Ali Al-Enazi	1/27/22 21:49	Great Application				en	sa	alrajhi	Smart application, cover all customer needs.	en	smart application cover customer need	Positive	App Store	1	0	0
App Store	4ee680e7-7a17-461a-8e4d-ff0880a742b6	Mahrous Badr	1/31/22 8:40	Alrajhi mobile app				en	sa	alrajhi	Very bad application always hanging and not working properly please update or adjust	en	bad application always hang work properly please update adjust	Negative	App Store	1	1	1
App Store	9551555f-db7e-46b2-9f92-4e3f225c8a85	aasif mm khan	11/26/22 22:36	Please check new update				en	sa	alrajhi	OTP problem	hu	otp problem	Negative	App Store	0	1	0
App Store	c4ad5e4c-4972-4954-9d60-9a0ee9a056d7	Rahul alukka	7/23/22 8:36	Very good service				en	sa	alrajhi	World numbers one bank	en	world number one bank	Neutral	App Store	0	0	0
App Store	0ac40a6a-a958-4aa8-9c6a-869a65707844	JannMiguel	4/27/22 5:58	Effecient				en	sa	alrajhi	Al Rhaji Bank App is very easy to use. Fast and hassle free transaction all the time. Keep it up.	en	al rhaji bank app easy use fast hassle free transaction time keep	Positive	App Store	0	0	0
App Store	fee3e71b-5f73-4805-8cb1-ba734f9b128b	خالد الحامد	3/12/22 7:43	Awesome, good layout and dashboard				en	sa	alrajhi	Every time AlrajhiTechnical teams amazed us with the wonderful features.	en	every time alrajhitechnical team amaze us wonderful feature	Positive	App Store	0	0	0
App Store	b8a69a49-503d-4e4c-b0da-cd933c2bdc6c	drjkhan24	4/4/22 14:03	New updated version is not working on iPhone				en	sa	alrajhi	App is not working,the updated version is not good and after login the screen I becomes blank told bank but the donât have reason to solve this issue.	en	app workingthe update version good login screen become blank tell bank dont reason solve issue	Negative	App Store	0	1	0
App Store	f2090cbc-44ac-49a7-99f2-6d58a469e57c	abrar1987	3/11/22 17:03	Amazing improvement				en	sa	alrajhi	The new version of the app is great easy and secure	en	new version app great easy secure	Positive	App Store	0	0	0
App Store	a8f21b9d-31fa-41f2-ac5c-4cd90c8d6972	Mesh3lss	3/11/22 16:16	Greatest UI for Bank app				en	sa	alrajhi	Best user interface, easy to sigh in and do your transfers.	en	best user interface easy sigh transfer	Positive	App Store	0	0	0
App Store	8b48283c-7b30-4dbd-ae25-699779479b44	yhosi boy	1/28/22 20:37	Awesome				en	sa	alrajhi	It makes your transaction easy and affordable	en	make transaction easy affordable	Positive	App Store	0	0	0
App Store	de41cdec-55be-4403-a8dd-a0d2e282b4ca	Nouman Ismail	1/18/22 6:51	Helpful app				en	sa	alrajhi	This is best bank to send money for home country	en	best bank send money home country	Positive	App Store	0	0	0
App Store	9b654c96-a24c-478a-bbed-cf5d27c70d7e	shaji076	1/16/22 18:13	Amazing App				en	sa	alrajhi	Very user friendly app better than all the apps of Saudi banks .	en	user friendly app good apps saudi bank	Positive	App Store	0	0	0
App Store	a12070dc-9fe8-4aa7-901c-7f55e98f5786	Kholoud Abuof	1/7/22 16:14	The best bank application I used				en	sa	alrajhi	The best bank application I used , well done AlRajhi Bank	en	best bank application use well do alrajhi bank	Positive	App Store	0	0	0
App Store	01241692-c9be-4eab-8a61-baea8139ac32	Mohammad Izhar	1/6/22 4:44	Easy to use				en	sa	alrajhi	Very good service and easy to use	en	good service easy use	Positive	App Store	0	0	0
App Store	bb3d6af6-8f7a-4de5-a050-4ce712ebfedb	mneerahdoss	8/14/23 12:12	Best mobile app for banking services				en	sa	alrajhi	Best mobile app for banking services	en	best mobile app bank service	Positive	App Store	0	0	0
App Store	5fd0a0dc-38fb-4437-9826-a1d8ebda4115	Twhab	5/20/23 2:57	Excellent				en	sa	alrajhi	Powerful & friendly user experience ðð»	en	powerful friendly user experience	Positive	App Store	0	0	0
App Store	f60e508f-909e-44d2-9d92-7f1e7089fe8f	m8rn_1	5/18/23 18:57	The best and fastest bank				en	sa	alrajhi	The fastest and smartest application and its services are completed at the same moment. Thank you Al Rajhi ð¤	en	fast smart application service complete moment thank al rajhi	Positive	App Store	0	0	0
App Store	2b938caf-1007-4c7a-9557-35a8d62ff604	Tilak lafa	2/17/23 19:19	It’s awesome and easy for transfers anywhere and pay bill				en	sa	alrajhi	Itâs awesome and easy for transfers anywhere and pay bill	und	awesome easy transfer anywhere pay bill	Positive	App Store	0	0	0
App Store	35046ab1-2ff3-491c-bfee-666857bd0328	Bhattisb078	4/22/23 18:58	Not able to remittence				en	sa	alrajhi	I trust on my bank and banking application and spoil my vacation because alrajhi is asking my Arabic name once I provide ended data error and not able to send remittance to my self contact on twitter and mail nothing come back to me	en	trust bank bank application spoil vacation alrajhi ask arabic name provide end data error able send remittance self contact twitter mail nothing come back	Negative	App Store	0	1	1
App Store	989635fb-a2fd-47b1-b3b0-c74b228cbeaf	ali911ghamdi	10/20/22 15:30	Request				en	sa	alrajhi	Fell free to deposit money in my account at any time ð	en	fell free deposit money account time	Neutral	App Store	0	1	0
App Store	0607c075-1697-4e19-8e19-45efac451888	nexmx	5/16/22 16:05	Simply the best				en	sa	alrajhi	One of the best bank apps,fast,easy,professional.	en	one best bank appsfasteasyprofessional	Positive	App Store	0	0	0
App Store	39d28a59-5420-4c2a-b140-c949c51064ca	ashy9090	8/26/22 7:56	Plz fix				en	sa	alrajhi	I cant log in after the update	en	cant log update	Neutral	App Store	0	1	0
App Store	9a87cfaf-4bec-4d24-8d72-68c3e79f8903	bankclientsa	4/30/22 18:55	Excellent				en	sa	alrajhi	Itâs excellent. The most fruitful bank service I have ever used	en	excellent fruitful bank service ever use	Positive	App Store	0	0	0
App Store	ff7a8fd5-ba20-4f93-b677-5e05af3d2e0b	kutty5656	4/25/22 23:56	Thanks to Alrajhi bank team				en	sa	alrajhi	Very Good method for one time password 02 time usageâs Appreciate	en	good method one time password time usages appreciate	Positive	App Store	0	1	0
App Store	76278649-adb7-4d2a-b393-5d87368b32b9	Moahmed Ezzat	4/24/22 13:27	Mr Mohamed Ezzat				en	sa	alrajhi	All internet service banking amazing Please share your experience with my lovely country Egypt as best practise participation of Co operation roll	en	internet service bank amaze please share experience lovely country egypt best practise participation co operation roll	Positive	App Store	0	0	0
App Store	eb1cc999-5410-448f-a7ec-dcff41efb6d7	aso.00	4/23/22 19:09	Fast and convenient				en	sa	alrajhi	Save time. Fast and convenient	en	save time fast convenient	Positive	App Store	0	0	0
App Store	f42f6f4e-a616-40c4-87ab-69932face776	Teto1992	4/21/22 16:50	Well done				en	sa	alrajhi	More than perfect	en	perfect	Positive	App Store	0	0	0
App Store	b91ec9a4-6123-4f6a-a8a7-e60aede3d6cb	Ossama122	2/24/22 5:55	Excellent service				en	sa	alrajhi	Wonderful and fastest serving I found Thank you	en	wonderful fast serve find thank	Positive	App Store	0	0	0
App Store	549c8b37-31b0-4861-ae2d-fc65b7459bec	reviewer.new	2/13/22 18:43	great application				en	sa	alrajhi	great app , functional, clear and fast .Thank you	en	great app functional clear fast thank	Positive	App Store	0	0	0
App Store	e175bbae-23c5-4577-9a34-ff94c1295565	(WAIS)	2/9/22 19:29	Great				en	sa	alrajhi	I donât say that this app is one of the best banking app but I want to it is the best number one banking app	en	dont say app one best bank app want best number one bank app	Positive	App Store	0	0	0
App Store	9625844b-795a-41fa-8839-ce13e0e7db1b	yusha123344	2/5/22 21:44	Very smooth and fast				en	sa	alrajhi	Very smooth and fast	en	smooth fast	Positive	App Store	0	0	0
App Store	1da2cbed-62db-4b5e-a56e-74b1c96751f9	REEMDQH	2/1/22 6:24	Fast service				en	sa	alrajhi	Fast service. Fast service	en	fast service fast service	Positive	App Store	0	0	0
App Store	f4af8599-7f14-49ab-a4d9-c456597488d2	nisu1	1/29/22 22:04	Fast transfer				en	sa	alrajhi	Iâm happy customer	en	im happy customer	Positive	App Store	0	0	0
App Store	93109516-e99f-40e4-91bc-c9b73cf8b1d3	Abdallahami	1/6/22 7:49	Absolutely the best				en	sa	alrajhi	After using five banks iPhone apps, this one is absolutely the best.	en	use five bank iphone apps one absolutely best	Positive	App Store	0	0	0
App Store	0f00f6f9-9e8d-43eb-82a7-4fb43445c8e7	Mr. Shafi	1/21/22 22:40	Sign in issue				en	sa	alrajhi	I have installed this app since almost two months but itâs not appear on to my iPhone6!!! Whenever I try to sign in after login itâs disappeared . There is no sms , no notifications or no any suggestions!! So, now what need to do???	en	instal app since almost two months appear iphone whenever try sign login disappear sms notifications suggestions need	Negative	App Store	0	1	0
App Store	3c38d399-fc1e-4f1f-960a-77646cee2e19	majid.zia	1/4/22 11:02	International transfer				en	sa	alrajhi	Very good just a second transfer Without charges Regards Majid	en	good second transfer without charge regard majid	Positive	App Store	1	0	0
App Store	7c104db2-d033-4c4f-a669-d9c44d0bcfee	Suliman97	3/31/23 0:44	Rajhi bank				en	sa	alrajhi	The best bankâs app in Saudi Arabia Simple, fast, easy to manage your daily tasks.	en	best bank app saudi arabia simple fast easy manage daily task	Positive	App Store	0	0	0
App Store	6409ff36-8284-4bbb-8a1f-b86efd006bef	siomai🫶🏻	2/26/23 16:53	Alrajhi bank app				en	sa	alrajhi	the service app was more useful and fastð«¶ð»	en	service app useful fast	Positive	App Store	0	0	0
App Store	f74b33c6-4208-48f8-abfe-2554253829ca	Waseem Khan Abdali	8/29/22 10:25	Unregistered Browser				en	sa	alrajhi	What is That cant login on Laptop	en	cant login laptop	Negative	App Store	0	1	0
App Store	d4baf800-7be0-435a-b294-b6f6ffbf5d0e	أبو حازم الورد	5/14/22 19:09	Nice bank				en	sa	alrajhi	Thank you for all think	en	thank think	Positive	App Store	0	0	0
App Store	3ccebba2-2c4b-491e-b646-65088e24f7a6	malsabbar	5/11/22 11:38	Outstanding				en	sa	alrajhi	Keep the good performance up.	en	keep good performance	Positive	App Store	0	0	0
App Store	d6ca6281-2f4a-447b-b09c-afbbcf5e5c65	Mark0703	4/28/22 21:27	Transfer				en	sa	alrajhi	Very fast and efficient	en	fast efficient	Positive	App Store	0	0	0
App Store	2b9a1496-2edf-4968-bc9f-3b6b79d9958d	557772715	4/30/22 20:29	Great				en	sa	alrajhi	Quick pay not available !!	en	quick pay available	Negative	App Store	0	0	0
App Store	005e30fe-eb17-43bb-8966-aeb46a598b23	KSM801	4/27/22 9:30	Best Banking App				en	sa	alrajhi	One of the best banking app, which gives you flexibility in every aspect.	en	one best bank app give flexibility every aspect	Positive	App Store	0	0	0
App Store	5bd06c28-0f1a-4019-a9be-851dc474eb02	Rdonia	4/28/22 20:48	Easy to use				en	sa	alrajhi	One of the easiest bank Application to use	en	one easy bank application use	Positive	App Store	0	0	0
App Store	9ea1f4db-939a-4602-8d12-a37a9caaad23	warsalan	4/28/22 1:49	Worst service				en	sa	alrajhi	There has been so much disruption in your service today, I keep on login and log out finally after 2-3 hours I was able to make transactions Very bad experience today	en	much disruption service today keep login log finally hours able make transactions bad experience today	Negative	App Store	1	1	0
App Store	f0668712-c8a1-4b2a-81be-0ed5b3530a2b	hussein00000000000000	4/18/22 0:42	Until now very good				en	sa	alrajhi	Until now very good	en	good	Positive	App Store	0	0	0
App Store	cf5b12e9-94aa-472a-8226-afa1e17b7ed4	Rafaqqq	4/16/22 10:39	Great app				en	sa	alrajhi	Easy and user friendly	en	easy user friendly	Positive	App Store	0	0	0
App Store	cd5b1fd5-f8c7-4c13-97fb-cfcde3283f48	Mrs Habib	4/13/22 17:20	Transaction				en	sa	alrajhi	It is confusing to do	en	confuse	Negative	App Store	0	0	0
App Store	cd6336a0-f22b-4711-8cf1-704a45e8278c	3boood91	4/8/22 15:56	Great application				en	sa	alrajhi	Highly recommended for Rajhi Bank Customers	en	highly recommend rajhi bank customers	Positive	App Store	0	0	0
App Store	23b73024-3539-4186-b6dd-267fbf27a43d	Malfahad	4/5/22 22:05	Wonderful application				en	sa	alrajhi	Very easy to use straightforward no complication.	en	easy use straightforward complication	Positive	App Store	0	0	0
App Store	9c5c135a-1574-4e37-9d5f-ae22a75dd10d	Hasan Tohari	4/4/22 21:16	Nice Service				en	sa	alrajhi	Special thanks for premium service	en	special thank premium service	Positive	App Store	0	0	0
App Store	b9c72a89-cfb9-49b8-a3f3-e78b98d2fa21	Hassy699	2/28/22 19:40	Incredible Fast				en	sa	alrajhi	Fast and secure, Absolutely loved the experience	en	fast secure absolutely love experience	Positive	App Store	0	0	0
App Store	679c5a87-7d3a-447f-9ce0-75071ff70df8	dar_k107	2/27/22 3:50	It’s really great I hope it still like what it is now				en	sa	alrajhi	Itâs really great I hope it still like what it is now	en	really great hope still like	Positive	App Store	0	0	0
App Store	0299ae42-b5a0-4fb8-9ff7-1401a35e3bce	alex Gamil	2/23/22 21:41	Good service				en	sa	alrajhi	In fact Alrajhi bank make very good services	en	fact alrajhi bank make good service	Positive	App Store	0	0	0
App Store	eb960af0-71af-4080-85e9-cb9d605ee740	Hassannoor80	6/8/23 7:09	Wonderful				en	sa	alrajhi	Banking made easy â¤ï¸Alrajhi Bank Thank you, Thank you, Thank you!!	en	bank make easy alrajhi bank thank thank thank	Positive	App Store	0	0	0
App Store	e4d92243-84da-4a05-a3ee-b62b1778e759	Syed Javeed	6/20/23 10:09	Good service				en	sa	alrajhi	iam unable to do International transfer it is showing error.	en	iam unable international transfer show error	Negative	App Store	0	1	0
App Store	5030caf7-9509-487e-8d5a-d762d9f986e5	Husoli69	4/28/22 9:43	Awesome				en	sa	alrajhi	Very Smart and fast with easy interface.	en	smart fast easy interface	Positive	App Store	0	0	0
App Store	f2bd59a3-d0ad-40b2-be77-d6e1b32302c2	lil-Muzza	2/5/23 19:43	Beware				en	sa	alrajhi	Just be careful before you transfer or deposit! They will freeze your balance without any notice! And then they will not even provide any information to why it was frozen!	en	careful transfer deposit freeze balance without notice even provide information freeze	Negative	App Store	1	0	1
App Store	f57d1a3a-2ec5-46bf-bd6b-ee669081e281	Eyedocijazkhan	1/26/23 9:34	Worst experience				en	sa	alrajhi	Login password showing error something went wrong have to restart it multiple times. And digit password register isnot working when you click on it	en	login password show error something go wrong restart multiple time digit password register isnot work click	Negative	App Store	0	1	0
App Store	9d1618d6-9cfc-46ef-88a8-fe08bcf6c0c8	saud_44444	4/23/22 14:21	Good				en	sa	alrajhi	Thank you for the service	en	thank service	Positive	App Store	0	0	0
App Store	0ad4d881-4d05-4090-8e8b-3fd9a87284a2	Marcus1899	4/2/22 16:40	Best app				en	sa	alrajhi	Best banking app i have ever used, easy and user friendly	en	best bank app ever use easy user friendly	Positive	App Store	0	0	0
App Store	7a2f2f18-0c5c-418e-ad8e-681790fa2c7e	Ibrahim0019	3/12/22 17:09	Milestone update				en	sa	alrajhi	Thank you for the new update	en	thank new update	Positive	App Store	0	0	0
App Store	dd1429c7-be75-46c0-bc2c-80bda6e24584	Rekzzy	2/28/22 20:33	Great Application				en	sa	alrajhi	Always good and easy service	en	always good easy service	Positive	App Store	0	0	0
App Store	60948a1a-75e7-4c61-aa83-15992b1d076a	mth92	2/20/22 23:22	Easier than water				en	sa	alrajhi	Easier than water	en	easy water	Negative	App Store	0	0	0
App Store	ee69c4e8-2597-433e-a205-340dc3282d72	Hakeem1720	2/9/22 12:26	Great Experience				en	sa	alrajhi	Very effective and user friendly	en	effective user friendly	Positive	App Store	0	0	0
App Store	76cda53d-c61e-420b-9851-254178d9b96e	Soban Mirza	2/10/22 10:54	Best Service				en	sa	alrajhi	Experienced one of the Best Service so far as compared to the other Banks. Recommended for All.	en	experience one best service far compare bank recommend	Positive	App Store	0	0	0
App Store	a6bac051-1a9a-4c32-8ee4-43d438080e9d	Muhammad Rehan Iqbal	2/8/22 21:26	Friendly banking application				en	sa	alrajhi	Amazing experience	en	amaze experience	Positive	App Store	0	0	0
App Store	53cfc1c8-75de-47ef-aa6e-94b01d2a0f89	sajase	1/8/22 12:10	Alrajhi app				en	sa	alrajhi	Better than the older version ðð»	en	good old version	Positive	App Store	0	0	0
App Store	c5b23642-bbe1-4cc6-b234-1f7ce5dfdb75	khalil2022	1/6/22 12:39	Online services				en	sa	alrajhi	Thank you for the great electronic services	en	thank great electronic service	Positive	App Store	0	0	0
App Store	cf9a18ba-969b-4070-b536-8d28969a500d	abu shok	7/28/23 21:26	Review				en	sa	alrajhi	Very cool experience I advice my friends to open account	en	cool experience advice friends open account	Positive	App Store	0	0	0
App Store	e697b689-c431-4fe4-b276-7ba908a067c1	Rhfk	7/12/23 12:38	Great bank				en	sa	alrajhi	I love the bank and itâs very very easy to use	en	love bank easy use	Positive	App Store	0	0	0
App Store	7efede46-8f95-429c-8df1-bdad90fdf2e1	Mallah58	7/1/23 4:29	Best effective bank in Saudi Arabia				en	sa	alrajhi	Amazing , Easy , collect all bank services in one application â¥ï¸â¥ï¸â¥ï¸	en	amaze easy collect bank service one application	Positive	App Store	0	0	0
App Store	94c27b10-5ac2-427a-aa19-e0578efb19e3	naif_alhamdan	5/24/23 10:59	Perfect experience				en	sa	alrajhi	Good app and helpful and so easy +10	en	good app helpful easy	Positive	App Store	0	0	0
App Store	34d1d72c-78a7-429a-848d-fc8cb016cf90	ssainudeen	2/21/23 16:16	Very good				en	sa	alrajhi	Better service and very fast	en	good service fast	Positive	App Store	0	0	0
App Store	541c7b17-56a7-4741-81ee-00e515494593	DevYahya	1/12/23 21:33	Unable to use FaceID				en	sa	alrajhi	Unable to access FaceID in the app, I have activated it in the menu and I donât see it in Settings FaceID apps.	en	unable access faceid app activate menu dont see settings faceid apps	Negative	App Store	0	1	0
App Store	053a7cdb-7f6f-4b6e-a8ad-3053079543c5	shumzizi	8/28/22 23:51	Transfer				en	sa	alrajhi	Can you bring back currency converter please	en	bring back currency converter please	Neutral	App Store	0	1	0
App Store	bd616d03-1cdd-4058-9980-08f62d52b9f1	Y. Mutahr	4/28/22 15:36	The best bank’s application				en	sa	alrajhi	The best bankâs application I have ever used	en	best bank application ever use	Positive	App Store	0	0	0
App Store	90158b68-c6bd-4677-831c-517adaa644e1	Htto0om	4/26/22 22:45	Great app 👍				en	sa	alrajhi	Best app ever, many features that no other bank in Saudi is offeringðð	en	best app ever many feature bank saudi offer	Positive	App Store	0	0	0
App Store	e31a4260-670e-4921-97cb-5637498941e9	Kj001kww	4/27/22 12:36	Interface				en	sa	alrajhi	Nice user-friendly design. Easy and powerful ðð»	en	nice userfriendly design easy powerful	Positive	App Store	0	0	0
App Store	7be45f0b-96b3-42f1-99ec-40a5c8b77cb6	Pagadilan	4/25/22 22:26	Thank you very much. This is a big help apps				en	sa	alrajhi	Amazing Apps. Thanks so much	en	amaze apps thank much	Positive	App Store	0	0	0
App Store	242f4c62-71d8-4f56-af7e-cd7b306a6b13	Mujahid786687	4/25/22 1:57	Al rajhi service				en	sa	alrajhi	Since i used Al Rajhi account i am feeling so excited Al Rajhi bank providing very good services.	en	since use al rajhi account feel excite al rajhi bank provide good service	Positive	App Store	0	0	0
App Store	cddde2c5-a3d1-4f50-ad71-fdf08202e024	Mawrah87	4/13/22 23:33	Rajhi new application				en	sa	alrajhi	Very entertaining and easy to use	en	entertain easy use	Positive	App Store	0	0	0
App Store	591533b9-9492-49f5-8a8c-e2af33764219	Haya'1997	4/9/22 23:25	Good service				en	sa	alrajhi	Itâs simple application to use	en	simple application use	Positive	App Store	0	0	0
App Store	d17d8045-7e43-4201-a857-debff95d9d60	FERY_GAMAL	4/9/22 12:13	Best internet banking service				en	sa	alrajhi	Best internet banking service	en	best internet bank service	Positive	App Store	0	0	0
App Store	e32d6d83-7b52-4087-ac30-a4965dfe8cfa	Helalz	4/2/22 12:59	Very useful				en	sa	alrajhi	Great app, easy to use and full of features	en	great app easy use full feature	Positive	App Store	0	0	0
App Store	dcd734da-8bf0-4ead-8b6f-beac81ba7599	ReemAlkhashab	3/28/22 15:08	Best bank ever				en	sa	alrajhi	I can say with confidence that youâre the best bank in regards the banking app.	en	say confidence youre best bank regard bank app	Positive	App Store	0	0	0
App Store	8859bdfe-b204-423c-ae5e-cdbe4f65a1bb	D7_almous	3/25/22 17:53	My feedback				en	sa	alrajhi	It is a smooth app	en	smooth app	Positive	App Store	0	0	0
App Store	b3e6c4d4-8640-4423-a2c1-3dda121c49a9	ReemaHomrani	3/12/22 14:02	Alrajhi bank				en	sa	alrajhi	The best bank application I dealt with it ever ð Thank you for your services	en	best bank application deal ever thank service	Positive	App Store	0	0	0
App Store	16e3882c-9771-4103-8554-57dd9404f89d	drmahnashi	2/27/22 15:20	Super				en	sa	alrajhi	Easy and professional	en	easy professional	Positive	App Store	0	0	0
App Store	6d993c21-e046-4887-b46a-ebc2e911c809	iphony22	2/14/22 9:06	Excellent App				en	sa	alrajhi	You can do what do you want as you want.	en	want want	Neutral	App Store	1	0	0
App Store	5c478678-a5d1-4751-b7ca-be61cd0a5965	shitos73	1/29/22 14:53	Alrajhi App				en	sa	alrajhi	Enhanced services and friendly interface	en	enhance service friendly interface	Positive	App Store	0	0	0
App Store	15d4ac4a-eab1-41c7-9427-7269f025b13e	Fazal Khatri	1/24/22 8:36	Bank transfer				en	sa	alrajhi	Very easy n fast .	en	easy n fast	Positive	App Store	0	0	0
App Store	29d24232-2342-43ad-9d6f-fcbbeae5c04c	قاف	1/20/22 10:52	Best banking app				en	sa	alrajhi	Smooth, great options, easy to use Keep it up ðð¼	en	smooth great options easy use keep	Positive	App Store	0	0	0
App Store	eaac6bf1-ee49-4d6c-958d-02bf6f9e3687	Neno 77	1/4/22 9:07	Awesome application				en	sa	alrajhi	Simple, amazing and very convenient usage.. Keep it up	en	simple amaze convenient usage keep	Positive	App Store	1	0	0
App Store	20a324b7-4451-4cb9-aea8-adfc076c07d3	prince nepal	6/6/23 21:19	Easy to use				en	sa	alrajhi	Very nice thank you alrajhi bank	en	nice thank alrajhi bank	Positive	App Store	0	0	0
App Store	9bf639f8-94e2-476b-89fb-7013e1ba8dde	Happy allahmudellah	6/12/23 14:58	Helpful				en	sa	alrajhi	More then 10 yrs iam using al rajhi account easy to send money quickly and security	en	yrs iam use al rajhi account easy send money quickly security	Positive	App Store	0	0	0
App Store	e2cf65c6-8982-4ac3-8227-13ffaec1d093	pinangjo	8/9/22 14:33	Perfect				en	sa	alrajhi	Awesome experience Very convenient and easy to use	en	awesome experience convenient easy use	Positive	App Store	0	0	0
App Store	3bdde126-0cbc-4b6e-ace3-2955bbbd886e	Abu Hamza Shah Khan	5/2/22 14:29	Shah				en	sa	alrajhi	Excellent banking ARB, I am really enjoying the online banking experience Thank you ARB Keep it up	en	excellent bank arb really enjoy online bank experience thank arb keep	Positive	App Store	0	0	0
App Store	b462ef54-f1b7-488e-8090-4618ca7ec148	momh1980	4/26/22 8:29	Easy working with it.				en	sa	alrajhi	Perfect application	en	perfect application	Positive	App Store	0	0	0
App Store	7c1569de-2830-4834-b110-8ad372383155	nurseHeroph	4/5/22 20:38	Mobile banking				en	sa	alrajhi	Very convenient. I gave 5 stars ð¥°	en	convenient give star	Positive	App Store	1	0	0
App Store	5c39bdee-f294-47d6-a4a1-f626b298bc50	Ahmed US	4/19/22 18:28	Can not log in				en	sa	alrajhi	Itâs been 5 days and still can not log in, when i enter my user and password it lags, Iâve deleted the app and reinstalled it again still same issue.	en	days still log enter user password lag ive delete app reinstall still issue	Negative	App Store	0	1	0
App Store	fd3abd2d-5713-4321-bed1-9eae5853f166	Woozyyy999	4/3/22 21:25	Best app of a bank				en	sa	alrajhi	Optimized, smooth and beautiful to deal with.	en	optimize smooth beautiful deal	Positive	App Store	0	0	0
App Store	e55223ea-ddb8-4037-8a7b-a4aa91e10cc6	mans_435	2/24/22 16:10	Great				en	sa	alrajhi	Always good improvement	en	always good improvement	Positive	App Store	0	0	0
App Store	1fd30c27-fa9f-442b-a4ab-5f547e925733	nzaar9	3/29/22 5:37	Digital Card Refund Issue (USD)				en	sa	alrajhi	Itâs been a week for me calling and emailing support to return my money that disappeared and not showing in my main account after I used the refund functionality. A real nightmare I want it to end	en	week call email support return money disappear show main account use refund functionality real nightmare want end	Negative	App Store	0	1	0
App Store	4d57ff78-e9cc-4163-8df1-c86fdd3e4a07	nylyam	3/14/22 14:31	Great banking online service				en	sa	alrajhi	Thank you for the great service. Keep it up!	en	thank great service keep	Positive	App Store	0	0	0
App Store	3f7bcd2c-0f12-4ff1-b5eb-45078875755f	Turki 430	1/13/22 14:16	Turki Alsalem				en	sa	alrajhi	This app has service (Quick login ) it's a great service I like it	en	app service quick login great service like	Positive	App Store	0	0	0
App Store	081d9f7f-4f50-41c3-a938-03d87e6157e7	M.Yaqoot	1/2/22 8:28	Amazing Application				en	sa	alrajhi	I like the new version very much	en	like new version much	Positive	App Store	0	0	0
App Store	d967bc85-bf12-435c-9f06-7c159822ef0f	Fkhard23	7/29/23 2:02	Good Bank				en	sa	alrajhi	Very smooth and easy	en	smooth easy	Positive	App Store	0	0	0
App Store	029228dc-3a85-4370-ad89-54d75cbad427	DRMRADWAN2000	6/19/23 12:27	Thank you very much ,, very Respectful Bank				en	sa	alrajhi	Thank you very much ,, very Respectful Bank	en	thank much respectful bank	Positive	App Store	0	0	0
App Store	002bdcc0-c3b8-4eb3-89f8-faffea7fb7f0	Rashid Faiz Raja	7/13/23 0:27	Need improvisation				en	sa	alrajhi	Now doubt Al Rajhi has developed a beautiful app but it still requires a lot of thing to improve like to make the app user friendly and options should have be clear and accessible for the user	en	doubt al rajhi develop beautiful app still require lot thing improve like make app user friendly options clear accessible user	Neutral	App Store	1	0	0
App Store	07b8aea1-833c-4986-98c5-3e2454fe21d7	Pervez11	6/6/23 6:05	Happy				en	sa	alrajhi	I love rajhi bank system and service	en	love rajhi bank system service	Positive	App Store	0	0	0
App Store	28be036c-dcc9-4a6c-850c-5d896386e829	Benmoko	6/10/23 1:02	Useless				en	sa	alrajhi	Everytime i update my account information here it always says GENERAL DATA ERROR Even if i write all correct always error, I cant take my card in your kiosk here in KSA Because always need to activate Please fix i need my card!	en	everytime update account information always say general data error even write correct always error cant take card kiosk ksa always need activate please fix need card	Negative	App Store	0	1	0
App Store	67483ce7-bb07-4c9a-8f70-5f02de61de48	alsalmnte	3/3/23 18:49	Alrajhi Bank app				en	sa	alrajhi	Guys you have the best Bank apps ever ,, keep it up and amaze us more. :)	en	guy best bank apps ever keep amaze us	Positive	App Store	0	0	0
App Store	c404b0e4-585b-41c1-be91-c41621bc0dda	abushaweesh	5/9/22 9:53	Very good				en	sa	alrajhi	Nice interface and easy application	en	nice interface easy application	Positive	App Store	0	0	0
App Store	e8373bee-65e1-45ba-a1dd-e4ff94c99e3c	renowitana	5/9/22 4:51	Very good and easy use alraji mobile banking				en	sa	alrajhi	Excellent. Very good and easy use alraji mobile banking	en	excellent good easy use alraji mobile bank	Positive	App Store	0	0	0
App Store	05b891c2-3f92-4994-9fb8-aabe4471d8f4	LOLE ?	4/27/22 22:48	BRUH ?				en	sa	alrajhi	The app's done, and if I enter it, it says a new update has been issued, I don't know why ?? Lol	en	apps do enter say new update issue dont know lol	Neutral	App Store	0	1	0
App Store	28b78717-e160-4235-9632-d74a9a74ffa4	Abood99166	4/26/22 15:34	Good experience				en	sa	alrajhi	I like the new app and how it is easy	en	like new app easy	Positive	App Store	0	0	0
App Store	c994fba3-da23-47e5-8ead-a947f2018295	Qasim Munir Mughal	4/26/22 14:25	Smart banking				en	sa	alrajhi	One of the best application i used for smart banking	en	one best application use smart bank	Positive	App Store	0	0	0
App Store	2b1b0a5b-a836-4db6-b328-d1dfef535f15	جمال - محافظة بقعاء	4/24/22 4:17	Jamalitooo23				en	sa	alrajhi	Good app reallyØ easy to use, fast to see	en	good app really easy use fast see	Positive	App Store	0	0	0
App Store	43b38f71-07bf-4bf1-8ba9-226760ce4d9e	D***f	4/5/22 7:42	Good improvement				en	sa	alrajhi	Best App , keep up this good improvement	en	best app keep good improvement	Positive	App Store	0	0	0
App Store	6abe82af-8f51-46c9-9a7c-33aacc1bb5f0	Sehamsa	4/2/22 12:11	Rajah app				en	sa	alrajhi	The easiest bank to use i very liked	en	easy bank use like	Positive	App Store	0	0	0
App Store	087c49f2-f924-420a-b5dd-a8a2af8f2dec	fahadaa91	2/27/22 21:22	Good service				en	sa	alrajhi	Your gateway to all your banking and financial services.	en	gateway bank financial service	Neutral	App Store	0	0	0
App Store	47a2fecf-3b26-4497-9666-a8dfcfef750e	iMajed 4	2/25/22 16:16	Great app, reliable! super easy to use				en	sa	alrajhi	Great app reliable! super easy to use	en	great app reliable super easy use	Positive	App Store	0	0	0
App Store	85b26b19-3e69-4731-b753-272dce84da52	BO ABEED	2/14/22 18:14	Best app for bank application				en	sa	alrajhi	Best app for bank application easy to use	en	best app bank application easy use	Positive	App Store	0	0	0
App Store	a2d15696-f5fd-43f2-9db8-65e93ea83f8a	Mhd faslan	2/17/22 9:54	Errors always in the app				en	sa	alrajhi	âAn error occurred please try again later â This message coming maximum of the login time or when we create new account Please solve this kind of issues	en	error occur please try late message come maximum login time create new account please solve kind issue	Negative	App Store	0	1	0
App Store	13045c4c-fd90-46b6-9945-a9593e8e8ef6	hduejxbfbgjdiwjs1988	2/2/22 13:20	Temon				en	sa	alrajhi	Iâm really enjoying the last update ð	en	im really enjoy last update	Positive	App Store	0	0	0
App Store	db18ba57-c737-4277-b3ef-553a2fb1ff8c	RunningCayoty	1/20/22 12:34	Good Banking services				en	sa	alrajhi	Alrajhi is one of the top Saudi banks with easy to use online services.	en	alrajhi one top saudi bank easy use online service	Positive	App Store	0	0	0
App Store	4c5e2743-c116-4455-aed5-5f3e0a36bf6a	dr_alharbii	1/4/22 20:54	The first bank				en	sa	alrajhi	Good bank with fantastic services	en	good bank fantastic service	Positive	App Store	0	0	0
App Store	efc24250-365e-4b9b-90df-a61af6e67714	selfishdemeanor	1/4/22 18:55	Best bank in ksa				en	sa	alrajhi	Beat bank in ksa easy to open account just with absher	en	beat bank ksa easy open account absher	Positive	App Store	0	0	0
App Store	ceeed2f5-1139-428f-8d5a-87d5c6c10b12	Raed KL	7/7/23 8:58	Best app for a Saudi bank				en	sa	alrajhi	I have accounts in many Saudia banks, definitely Alrajhi app is the best	en	account many saudia bank definitely alrajhi app best	Positive	App Store	0	0	0
App Store	bd73e24a-3eb3-4bf5-aac1-d0dbc9725049	MD TAZAL ISLAM	10/2/22 19:58	Happy				en	sa	alrajhi	Itâs helpful for to transfer money	en	helpful transfer money	Positive	App Store	1	0	0
App Store	cf0b8284-58cd-4167-b477-90c63f3e0dc2	KK.Price	11/30/22 8:57	Application				en	sa	alrajhi	The application is not working normally its keep breaking-down i have to sign in agin and again. Secondly i am not able to pay my car instalments the option doesn't work at all Thanks	en	application work normally keep breakingdown sign agin secondly able pay car instalments option doesnt work thank	Negative	App Store	0	1	0
App Store	24781354-0f96-4a4d-842f-4a83877e9fe1	R25h	9/24/22 22:05	الراجحي				en	sa	alrajhi	Peace be upon you. I want you to activate the feature of deleting transfers in the Al-Rajhi app	en	peace upon want activate feature delete transfer alrajhi app	Positive	App Store	0	1	0
App Store	b44d1159-a226-480f-82f8-067a34f8ab5a	Abo Omer	5/11/22 14:17	Fabulous				en	sa	alrajhi	Nice, useful and practical app. The best app ever. I appreciate taking my note into consideration.	en	nice useful practical app best app ever appreciate take note consideration	Positive	App Store	0	0	0
App Store	348c3849-1188-4fc2-9ead-fc312bfa91cc	أبو عِوَض	5/3/22 6:22	Annoying request				en	sa	alrajhi	Very good app from Alrajhi	en	good app alrajhi	Positive	App Store	0	0	0
App Store	7d8505df-e945-476e-999a-285e1948a430	Helala Hasan	5/1/22 14:40	Best update.				en	sa	alrajhi	Thanks for the new update u made to ease my use of the app.	en	thank new update u make ease use app	Positive	App Store	0	0	0
App Store	7316f8d5-f752-4b69-bcb8-80f227029cf4	Qamarf	4/26/22 0:46	Thanks				en	sa	alrajhi	Thank you so much,it really helpful	en	thank muchit really helpful	Positive	App Store	0	0	0
App Store	f96ed989-c851-40d3-963d-7cc1e1d8e6fc	Omarmuthen	4/28/22 18:59	Still first time use after update. It looks ok. But needs time to give exact rating				en	sa	alrajhi	Still first time use after update. It looks ok. But needs time to give exact rating. Good	en	still first time use update look ok need time give exact rat good	Positive	App Store	1	0	0
App Store	1f698931-0c89-462a-b955-1c14978ee7f4	adnan thulli	4/25/22 23:16	Good Option				en	sa	alrajhi	Very nice easy to send money	en	nice easy send money	Positive	App Store	0	0	0
App Store	e7a06327-f666-4f02-87b9-48f152cd4151	nosa95	4/23/22 21:12	Good chance				en	sa	alrajhi	Useful & easy to use	en	useful easy use	Negative	App Store	0	0	0
App Store	c731831b-a7f8-455e-9eac-d8d6f45e5bbb	AbuAsim	4/19/22 23:49	Excellent app				en	sa	alrajhi	One of the easiest bank applications	en	one easy bank applications	Positive	App Store	0	0	0
App Store	9e842425-8ece-4169-a2f5-a4c99e3704ec	Khaldoon Sama	4/7/22 20:30	Brilliant				en	sa	alrajhi	The last version of your app is brilliant.	en	last version app brilliant	Positive	App Store	0	0	0
App Store	04e84353-8dee-4d6d-a583-d3fbdabd68e5	Abu othman1960	4/3/22 2:13	Great services				en	sa	alrajhi	Itâs great banking system an services , very realible and well constructed application	en	great bank system service realible well construct application	Positive	App Store	1	0	0
App Store	b0050f2a-4744-4459-83a0-114b2f71b878	Mnabea	3/18/22 16:29	Greatest				en	sa	alrajhi	A lot of developments and easy to use	en	lot developments easy use	Positive	App Store	0	0	0
App Store	7d938aa1-86e6-4fc9-8e74-9f7f9651e6da	ADS/Omar	3/18/22 10:37	Tec leader				en	sa	alrajhi	Always in the lead, when it comes to Technology.	en	always lead come technology	Positive	App Store	1	0	0
App Store	352e2e7a-965a-4989-bbb4-3ff8d5f88abe	amrelgaiar1414	2/14/22 21:26	Fast & accurate				en	sa	alrajhi	Perfect services	en	perfect service	Positive	App Store	0	0	0
App Store	576bac1f-c72a-4312-a7a0-03870db08769	shk waseem	2/5/22 7:40	Third name family name				en	sa	alrajhi	Why itâs mandatory to write third name and family name	en	mandatory write third name family name	Neutral	App Store	1	0	0
App Store	bc133b86-2051-4ee6-ab48-dbef6c9701d7	Shahadhotami	1/31/22 21:30	Best bank app ever				en	sa	alrajhi	Smooth , easy , smart and very useful	en	smooth easy smart useful	Positive	App Store	0	0	0
App Store	545183c7-796b-466d-8aef-f4318fd1f255	محمد١١٢٢	1/4/22 5:31	Me				en	sa	alrajhi	We thank you for this excellent application	en	thank excellent application	Positive	App Store	0	0	0
App Store	cbf2c17f-30a1-4c91-b337-cc190291439b	waazam	9/8/23 11:12	My rate about alrajhi bank treatments				en	sa	alrajhi	The best bank I have ever works with	en	best bank ever work	Positive	App Store	0	0	0
App Store	6ab31cfa-e55f-4c73-8342-9a34e618dc1d	A7medjhuhhhg	6/22/23 7:31	احمد حزيمي				en	sa	alrajhi	The best application of financial management I ever had strongly recommend using it ðâ¤ï¸	en	best application financial management ever strongly recommend use	Positive	App Store	0	0	0
App Store	d920b828-307d-4aaf-ac71-e2fe9322820d	!!SM!!	9/7/23 6:38	Always crashing				en	sa	alrajhi	Lots of crashes issues and you have to log in many times just to log in correctly and use the app	en	lot crash issue log many time log correctly use app	Negative	App Store	0	1	0
App Store	d363e2f1-b57d-450c-9e85-d17edeb6ee92	misjojjo	5/27/23 14:36	Nice application and bank				en	sa	alrajhi	Verry easy to use thanks	en	verry easy use thank	Positive	App Store	0	0	0
App Store	f196b59c-79c7-4710-b667-1559374a4c37	j djj na fncj	6/9/23 8:51	International Transfer				en	sa	alrajhi	I tried many time to transfer international but keep asking Arabic Full Name. And I tried to enter my Arabic name not work at all	en	try many time transfer international keep ask arabic full name try enter arabic name work	Negative	App Store	0	1	0
App Store	73b38ff6-abfa-4ba7-828d-317cf360dff3	I.Althinayaan	5/25/22 11:36	Amazing services				en	sa	alrajhi	Amazing and convincing services, thank you alrajhi bank for such a great application	en	amaze convince service thank alrajhi bank great application	Positive	App Store	0	0	0
App Store	a4638898-13e6-4694-a5ba-7787a2a6dbf4	bin-omar	5/21/23 19:05	Horrible				en	sa	alrajhi	Took me 6 to 7 times to register for a new account online. When I finally opened an account I couldn't access it because the app refuses to enter certain characters ððð	en	take time register new account online finally open account couldnt access app refuse enter certain character	Negative	App Store	0	1	1
App Store	4b926973-517e-4a79-8e84-6054667f2958	edy kosim 🇮🇩	9/9/22 16:33	Thank you alrajhi				en	sa	alrajhi	I just need your staff more helping to the customer specials for foreign because every alrajhi bank staff itâs not Frendly and too slow Because and bad behavior thanks you	en	need staff help customer specials foreign every alrajhi bank staff frendly slow bad behavior thank	Negative	App Store	1	0	1
App Store	050eeae6-e3d2-4ad6-9870-9d4e2bd37f6c	Indiralaa	5/19/22 17:26	The best multicurrency card				en	sa	alrajhi	Accessible and convenient, safe.	en	accessible convenient safe	Positive	App Store	0	0	0
App Store	3a619bd4-b73a-4688-9ec1-0bbdff237a8d	Younus_Rehan	5/11/22 6:50	Excellent Service				en	sa	alrajhi	Al Rajhi Bank make life easy, really itâs am amazing experience	en	al rajhi bank make life easy really amaze experience	Positive	App Store	0	0	0
App Store	6f1ed4a2-14a5-4fa0-b70e-ecfe78705cf1	Nashi95	5/13/22 15:20	App speed				en	sa	alrajhi	It takes bit more time when i open the app.	en	take bite time open app	Neutral	App Store	0	0	1
App Store	cb51e221-70e0-41a8-8055-0777f0c5d4af	lelou!	5/7/22 19:53	Thank you				en	sa	alrajhi	Easy fast	en	easy fast	Positive	App Store	0	0	0
App Store	254a69b0-057b-4e52-b23b-eef182ffa256	معجب بالسيف بلاي	5/3/22 22:14	Evaluation				en	sa	alrajhi	Amazing app more of other banking apps. Alrajhi bank going to the top	en	amaze app bank apps alrajhi bank go top	Positive	App Store	0	0	0
App Store	079d329b-5fa9-4aa6-9342-686c03e3b631	asz-96	5/1/22 5:56	Amazing				en	sa	alrajhi	Very fast and easy to use	en	fast easy use	Positive	App Store	0	0	0
App Store	45f6cb86-a7f3-42ac-ab75-4fca63329f0c	Khaled Almoaijel	4/30/22 21:25	Amazing App				en	sa	alrajhi	Smartest Bank app, and all you need is in. Fast responses is highly noted.	en	smart bank app need fast responses highly note	Positive	App Store	0	0	0
App Store	4b876235-61c3-4d91-805b-51923f732ee8	Ricco Shams	4/28/22 15:23	Love it. The best				en	sa	alrajhi	Amazing application. Better than any bank application ðâ¤ï¸	en	amaze application good bank application	Positive	App Store	0	0	0
App Store	f2a7dafd-d062-4b25-8375-7c56454b83b9	Mayoo hassan	4/26/22 10:59	Very good application				en	sa	alrajhi	Everything in the application is perfectâ¦	en	everything application perfect	Positive	App Store	0	0	0
App Store	0374920a-4bf0-4629-83b1-e79a7181e167	liberty_ali	4/25/22 19:13	Good one				en	sa	alrajhi	Good app..... hope i will get this message again	en	good app hope get message	Positive	App Store	1	0	0
App Store	dadbbab1-a831-4a5b-8d2f-4d6579a9ec17	المدينة المنوره	4/25/22 14:56	Happy to have				en	sa	alrajhi	Happy to have	en	happy	Positive	App Store	0	0	0
App Store	1d875ebe-7f6c-4620-8716-79b0d55e9955	Saleem Gujjar	4/24/22 3:44	Best services				en	sa	alrajhi	Best way to transfer money local or international	en	best way transfer money local international	Neutral	App Store	0	0	0
App Store	0ca68b4b-1b00-4a1d-b8b7-37ca3ed3a124	abomeshari💙	4/19/22 4:54	excellent 👍				en	sa	alrajhi	Al-Rajhi Bank is one of the best banks: it has many good services, really very excellent services.	en	alrajhi bank one best bank many good service really excellent service	Positive	App Store	0	0	0
App Store	5a0c7725-37e8-4b46-9e0f-cff72916daab	Moh Yasir	4/12/22 12:12	Very good				en	sa	alrajhi	Nice look and user friendly	en	nice look user friendly	Positive	App Store	0	0	0
App Store	c218aef8-2bf0-4ced-808a-c740bc073a1a	Marwan Sinno	4/7/22 22:32	Rajhi App				en	sa	alrajhi	Very interactive interface and nice background color combinations.	en	interactive interface nice background color combinations	Positive	App Store	1	0	0
App Store	2d5b82cb-ad1b-47f2-9c7b-ce1e8199caea	Ibn Alwatan	4/3/22 19:17	Nice App.				en	sa	alrajhi	Thank you for making banking so easy.	en	thank make bank easy	Positive	App Store	0	0	0
App Store	4e075f5d-674f-4898-993a-f78839eea5cc	Parwaz Rizwan	3/25/22 17:35	Service				en	sa	alrajhi	Hey guys I really happy with alrajhi bank service, what a amazing service	en	hey guy really happy alrajhi bank service amaze service	Positive	App Store	0	0	0
App Store	f6de9fb7-03ab-4842-b201-f640f3a01bcc	Attia000	3/17/22 18:37	Face ID issue				en	sa	alrajhi	Login through Face ID is not working	en	login face id work	Neutral	App Store	0	1	0
App Store	2e17d6a6-7920-4630-bba7-bfa3761870a3	jamilad	3/2/22 8:24	Excellent				en	sa	alrajhi	Easy application to use	en	easy application use	Positive	App Store	0	0	0
App Store	f1e6d574-41b1-4586-a089-a0cfc643bb52	Iam writing	2/19/22 18:59	Fast				en	sa	alrajhi	Really fast and simple	en	really fast simple	Positive	App Store	0	0	0
App Store	4976252d-bf65-485b-8a4b-61faae87bc51	MIDO 2016	2/13/22 0:23	Manager				en	sa	alrajhi	Thanks for this excellent service experience	en	thank excellent service experience	Positive	App Store	0	0	0
App Store	fed5dce9-6423-4474-84b7-5d105341b716	Palestine is above all	2/3/22 14:55	One of the easiest banks to deal with				en	sa	alrajhi	Very good, reliable, easy	en	good reliable easy	Positive	App Store	0	0	0
App Store	9cc8ef1f-5c58-44ad-b025-b89cd276f3a1	Sewes110	2/2/22 16:23	Essential				en	sa	alrajhi	It works great and no issues at the moment	en	work great issue moment	Positive	App Store	0	0	0
App Store	190f7ae7-670d-4b9b-955e-d1a295f4dddd	Rana9090Alaa	1/15/22 13:01	Thank you				en	sa	alrajhi	Thank you the fastest bank	en	thank fast bank	Positive	App Store	0	0	0
App Store	e7d3e9ac-c815-4d40-a8a0-e423f3a8fb40	MFaiyaz	1/12/22 7:51	MFaiyaz				en	sa	alrajhi	Excellent, Quick & user friendly app	en	excellent quick user friendly app	Positive	App Store	0	0	0
App Store	d2e8a88d-4324-455f-a9e9-5df45678163e	Adamxo	1/8/22 18:11	Great app				en	sa	alrajhi	All my expenses and payment i do it from it	en	expense payment	Neutral	App Store	0	1	0
App Store	2811170b-e5dc-4160-b08b-522e813aedbb	Abdulraheem1990	1/8/22 16:38	Good app				en	sa	alrajhi	Please donât ask me to rate the app every time. Stop it	en	please dont ask rate app every time stop	Negative	App Store	0	1	0
App Store	b3515495-2804-4ad0-bc74-2416d733c70f	Ahmad 0557777752	1/8/22 16:03	Thank you so much				en	sa	alrajhi	Appreciate	en	appreciate	Positive	App Store	0	0	0
App Store	612d112c-986a-4fba-91ea-fa9b40db787c	Albealen	1/8/22 15:14	Great work				en	sa	alrajhi	I really appreciate your work	en	really appreciate work	Positive	App Store	0	0	0
App Store	7c02b68f-b9f6-4357-a488-c0d1af9280ff	Abu Leen - G	8/12/23 8:27	Great App!				en	sa	alrajhi	Very easy processing. App suggestions are relevant and helping. Thank you	en	easy process app suggestions relevant help thank	Positive	App Store	0	0	0
App Store	d07f85ba-7da6-4e95-9518-4f6220debd83	rahazarkhan	7/16/23 16:23	Bank				en	sa	alrajhi	Such a great app very fast and good service	en	great app fast good service	Positive	App Store	0	0	0
App Store	f8dd837e-f6b8-409c-b002-68d676776b62	Khan4617	6/26/23 18:02	Alrajhi				en	sa	alrajhi	Easy to access and simple to use love it ð«¶	en	easy access simple use love	Positive	App Store	0	0	0
App Store	e13a1b5f-5d8b-463e-9f63-67b7c8398caf	Syed 143	6/15/23 11:50	Good Mobile platform				en	sa	alrajhi	Vvvvv Excellent mobile platform	en	vvvvv excellent mobile platform	Positive	App Store	0	0	0
App Store	af2d8033-41a6-4395-bd74-70b0d56955e3	Saroj khadkayy	6/1/23 12:33	Good service				en	sa	alrajhi	Thanks alrajhi for your service	en	thank alrajhi service	Positive	App Store	0	0	0
App Store	e77eb143-d2e4-406d-9185-76db34485c8c	Ha708090	5/9/22 5:52	You are the best				en	sa	alrajhi	Thanks for all of thing	en	thank thing	Positive	App Store	0	0	0
App Store	f52e9106-76b0-4a4b-8c05-0acbd37eb7df	AbdulazizBr	9/16/22 13:17	You cannot use the app without giving your location				en	sa	alrajhi	The only bank app iâve seen requiring your location to use the app, I believe itâs unjustifiable and kinda creepy.	en	bank app ive see require location use app believe unjustifiable kinda creepy	Negative	App Store	1	0	0
App Store	7f33b971-7c23-4a52-b258-7aa48442f173	Aman Ehsaas	5/1/22 10:43	Easy app				en	sa	alrajhi	Itâs great and fast service application ever	en	great fast service application ever	Positive	App Store	0	0	0
App Store	bcad0628-54b9-498a-8a34-d54cc37edce3	Lleen101	4/27/22 3:54	The app is so easy and handy great !				en	sa	alrajhi	Functional	en	functional	Neutral	App Store	0	1	0
App Store	0d140a6c-2717-4804-a12c-02899af69a34	ESMA86	4/24/22 16:59	Great				en	sa	alrajhi	Easy ...fast ..beautiful interface	en	easy fast beautiful interface	Positive	App Store	0	0	0
App Store	abcef283-b32a-486a-8165-c59408f2d581	lat119	4/24/22 4:50	Al-Rajhi is the best and easy-to-use banking application				en	sa	alrajhi	the best and easy-to-use banking application	en	best easytouse bank application	Positive	App Store	0	0	0
App Store	381aee0a-7fc0-472e-aedb-ab92178fada9	Refan awam	4/21/22 4:07	Well done				en	sa	alrajhi	Well done Thank you	en	well do thank	Positive	App Store	0	0	0
App Store	d6b75408-c132-453f-b761-5a5a9242a3fe	nojaid	4/18/22 9:10	Wha a nice app				en	sa	alrajhi	What a nice app . Makes everything easier	en	nice app make everything easy	Positive	App Store	0	0	0
App Store	5780a422-983b-4a36-b0e7-3d95f3a61912	rahafalsubhy	4/11/22 1:52	very happy to use this Bank				en	sa	alrajhi	good. very happy to use this Bank	en	good happy use bank	Positive	App Store	0	0	0
App Store	5340ef4a-4be8-44fb-91a1-198082234a2e	mishaari	3/13/22 6:19	Easy to use				en	sa	alrajhi	Simple to use	en	simple use	Neutral	App Store	0	0	0
App Store	0f872ff5-8a52-4962-9399-b8ed61ae7c04	MGHASSANHAMZA	4/5/22 8:20	Appreciated				en	sa	alrajhi	I am impressed the way you serve without any hassle.	en	impress way serve without hassle	Positive	App Store	1	0	0
App Store	72bcdee1-617d-4b67-9726-e3f5d44f6b92	Arif2233	2/19/22 10:22	Good				en	sa	alrajhi	Saving more time to transfer	en	save time transfer	Neutral	App Store	0	0	0
App Store	da25af3d-3736-481a-ab42-48da39822460	Totamj	2/16/22 16:36	New rajhi				en	sa	alrajhi	Good better than before	en	good good	Positive	App Store	0	0	0
App Store	cf87d945-0c5b-4ea2-983e-f7a92d9ce0c5	said380	2/3/22 13:10	Worlds best banking experience !!!				en	sa	alrajhi	Great Application and very easy to use!!!	en	great application easy use	Positive	App Store	0	0	0
App Store	44f502e8-45ab-4d01-a60a-58a1f74ea55e	Ma7moud aboal3la	2/12/22 12:14	Fast and convenient				en	sa	alrajhi	Fast and convenient	en	fast convenient	Positive	App Store	0	0	0
App Store	0056aeb1-5fa5-4948-8aa9-3e3abf077d71	tlm919	1/31/22 5:34	Good service’s				en	sa	alrajhi	Good serviceâs	en	good service	Positive	App Store	0	0	0
App Store	ad465c12-68c7-4a8a-bac0-eb8151503e9b	Sharks ebb	1/30/22 15:27	Very convenient. Fast transactions				en	sa	alrajhi	Very convenient. Fast transactions	und	convenient fast transactions	Positive	App Store	0	0	0
App Store	f9b517b0-24c4-4fd6-8672-49ec7403c78d	ShymaMarshal	1/28/22 12:50	Excellent				en	sa	alrajhi	The application is user-friendly and is really beneficial ðð½	en	application userfriendly really beneficial	Positive	App Store	1	0	0
App Store	43a67dd7-f168-41c7-9ecd-77c2bc73eda0	والله ماكان الفراق اختياري	1/18/22 13:00	The best				en	sa	alrajhi	Was low now is very high service	en	low high service	Negative	App Store	1	0	0
App Store	4ff08399-5db1-4e13-90b0-d066350f6822	rtydfhg	1/17/22 4:00	Good app				en	sa	alrajhi	Very good updates easy and clear	en	good update easy clear	Positive	App Store	0	0	0
App Store	ce88d278-7c7c-47be-8e71-66f6d2d519df	Loayaabi	1/8/22 8:22	Excellent				en	sa	alrajhi	Very user friendly	en	user friendly	Positive	App Store	0	0	0
App Store	db3f9a5f-fc9b-4100-81d1-bcce7e4b984e	Mohammed Bin Amer	1/14/22 19:40	Hard to read				en	sa	alrajhi	Font is very hard & small to read while you have space to maximise . Thanks	en	font hard small read space maximise thank	Neutral	App Store	1	0	0
App Store	f9407c0f-78e7-4eec-8185-30f19ba309ad	SAIFUL4036	6/5/23 17:43	Excellent service				en	sa	alrajhi	Al Rajhi app is one my favorite banking app. It's very easy to operate. Nice unser interface. Love it	en	al rajhi app one favorite bank app easy operate nice unser interface love	Positive	App Store	0	0	0
App Store	3011bc2c-7430-40f8-ad37-d732d8c97325	Afäf	5/5/22 18:40	Perfect experience				en	sa	alrajhi	This bank have a perfect app	en	bank perfect app	Positive	App Store	0	0	0
App Store	9bdefc29-3342-4ce7-aeaf-d292970549d9	Mohd 07	4/11/23 16:18	Update was,t good.				en	sa	alrajhi	Your new update for the application was very bad and it degrade the use of the application to the minimum,, just curious who,s benefit is it.	en	new update application bad degrade use application minimum curious whos benefit	Negative	App Store	1	0	0
App Store	52332cba-a60a-458d-92c6-4b85bab8f691	المكينزي sosomac	5/3/22 5:39	Sosomac				en	sa	alrajhi	Thanks so much for everything	en	thank much everything	Positive	App Store	0	0	0
App Store	e61405ff-4e7e-4694-939a-1e8f9f2a6971	Abdullah alrkabi	4/28/22 6:25	A				en	sa	alrajhi	Thank you so much very good program â¤ï¸	en	thank much good program	Positive	App Store	0	0	0
App Store	6d117ea0-fab0-48fe-bb83-3b1a39cd8cbb	S3_7thi	4/10/22 0:04	Great application				en	sa	alrajhi	Great application but the old version was more workable.	en	great application old version workable	Positive	App Store	0	1	0
App Store	302da650-03c9-463b-b534-11e07886073d	Halasami81	4/3/22 16:06	Easy to use				en	sa	alrajhi	Keep the good stuff	en	keep good stuff	Positive	App Store	0	0	0
App Store	f47cf4b2-a599-477c-962f-cd95e1a8a9aa	Kevin Joanna	3/30/22 3:13	Maria Jegan				en	sa	alrajhi	Very easier and fast support service	en	easy fast support service	Positive	App Store	0	0	0
App Store	2f86ec75-2cf1-44fb-b2e6-222ed163c892	Alaa20508	3/21/22 14:18	Easy and stable				en	sa	alrajhi	Easy to use, stable and pretty app	en	easy use stable pretty app	Positive	App Store	0	0	0
App Store	a691c3cf-124d-4b01-8b48-cf03b08cc57e	foubjk	3/12/22 19:54	Fantastic app				en	sa	alrajhi	Easy to use, quick and organized	en	easy use quick organize	Positive	App Store	0	0	0
App Store	9e6e9fcf-dfbb-400d-8678-97a5bae125ff	Rajiullah	3/2/22 13:24	Good App				en	sa	alrajhi	Itâs very good way to transfer money to local and international.	en	good way transfer money local international	Positive	App Store	1	0	0
App Store	c936bc84-2d46-4b9a-a539-fd6025cdfc7a	indian in saudi	2/9/22 9:29	Best bank ever				en	sa	alrajhi	Best app and bank ever .its very simple and fast app.i love this bank and appð¥°	en	best app bank ever simple fast appi love bank app	Positive	App Store	0	0	0
App Store	50a639a3-f623-4550-832e-3cf2bb2c69fa	mfayaz85	2/7/22 12:12	Very Helpful				en	sa	alrajhi	User friendly app	en	user friendly app	Positive	App Store	0	0	0
App Store	50b012ad-5017-4d26-89d2-c8045d43cf6b	rhenoben	1/30/22 6:41	Good services and Fast Transaction				en	sa	alrajhi	Nice job verry Smooth and fast transaction	en	nice job verry smooth fast transaction	Positive	App Store	0	0	0
App Store	cca4a015-e53a-4adf-88c6-c191abd66628	shareef88899	1/4/22 9:28	Easy				en	sa	alrajhi	Easy for using	en	easy use	Positive	App Store	0	0	0
App Store	d261cfc8-281a-4b74-8a4a-3b9cc5e2f368	Mahmood0550232	6/26/23 2:08	Great experience				en	sa	alrajhi	Very good experience with Alrajhi there is no competition with Alrajhi Bank nice and great experience	en	good experience alrajhi competition alrajhi bank nice great experience	Positive	App Store	0	0	0
App Store	7f9108e6-60d9-4395-a033-87793a20c44e	Shafiul009	5/24/23 17:24	Excellent				en	sa	alrajhi	The app os awesome. I wish their employees would be same. Their employees are one of the worst.	en	app os awesome wish employees would employees one bad	Negative	App Store	1	0	0
App Store	4a787436-9142-468b-b668-4192195a4f22	Asma almihammadi	5/24/23 5:30	Just brilliant				en	sa	alrajhi	Its smart, fast and very easy to navigate. Love it ð	en	smart fast easy navigate love	Positive	App Store	0	0	0
App Store	3d352c7e-09ad-4a17-b792-ceea2190e736	Fghjhxxxc	5/23/23 20:28	Good service				en	sa	alrajhi	Al-Rajhi bank is the best bank in all Electronic services in Al-rajhi app it is very fast no delay at all .	en	alrajhi bank best bank electronic service alrajhi app fast delay	Positive	App Store	0	0	1
App Store	e0351e0a-00af-4169-a085-c9cd28886396	Shdbghduuh	11/11/22 15:37	Best app ever best bank on earth				en	sa	alrajhi	Wallahi the best. Stop giving me notifications to rate and review. Ps wallah the best bank	en	wallahi best stop give notifications rate review ps wallah best bank	Positive	App Store	0	0	0
App Store	dd4b5a16-6a59-42c0-b5bf-7c401f7155c5	xReeko-	3/27/23 21:15	New UI				en	sa	alrajhi	I donât get it why change something that worked perfectly fine, this new ui they introduced is literal garbage itâs very complicated and annoying.	en	dont get change something work perfectly fine new ui introduce literal garbage complicate annoy	Negative	App Store	1	1	0
App Store	32edf623-22d7-4900-ae32-49efb12dbade	AFQ20	5/4/22 3:55	Great service at all				en	sa	alrajhi	Great service at all	en	great service	Positive	App Store	0	0	0
App Store	2b27aab5-9d1d-454c-816a-eb2b99f3429a	Moh_qt	4/27/22 4:54	Amazing and easy to use app				en	sa	alrajhi	Amazing and easy to use app	en	amaze easy use app	Positive	App Store	0	0	0
App Store	c042ac93-23ae-4992-a294-75651a4177a1	Dī maka	4/26/22 17:24	The best bank app ever				en	sa	alrajhi	Easy, fast , reliable and innovativeðð¼	en	easy fast reliable innovative	Positive	App Store	0	0	0
App Store	cf103038-be57-469b-97b9-88c79305215f	Ahmaka0b	4/24/22 13:45	Well design				en	sa	alrajhi	Nice and modern design, and good application options	en	nice modern design good application options	Positive	App Store	0	0	0
App Store	9e33cc55-b5e3-477d-bcc4-840b66a97fd2	J-The Doc	3/28/22 7:18	Dr Jawad				en	sa	alrajhi	Everything is in my hands on the go. Best offers for Rajhi Card holders	en	everything hand go best offer rajhi card holders	Positive	App Store	0	0	0
App Store	516cdabf-5f35-4a51-be42-17e375b6241a	Ultimate brave	3/13/22 19:38	Awesome application				en	sa	alrajhi	Itâs really amazing and friendly application	en	really amaze friendly application	Positive	App Store	0	0	0
App Store	721254bb-e6ab-4569-8418-2cebe2025f4e	sayedbava	2/18/22 15:52	Very simple And nice online option				en	sa	alrajhi	Very simple And nice online option	en	simple nice online option	Positive	App Store	0	0	0
App Store	ae8cba1a-ac03-4b77-8c5f-bd85455cdc08	Noorbishi	2/17/22 20:01	Excellent experience				en	sa	alrajhi	Easy and efficient app.	en	easy efficient app	Positive	App Store	0	0	0
App Store	7326d49e-fbe3-4629-8905-65546b4adb6c	Jafar Abu	2/16/22 16:47	Great				en	sa	alrajhi	Great and user friendly application	en	great user friendly application	Positive	App Store	0	0	0
App Store	6a006d41-4722-4fda-8881-ee7f85015472	RAEEQKM	2/16/22 14:09	Excellent				en	sa	alrajhi	Outstanding service..!	en	outstanding service	Positive	App Store	0	0	0
App Store	42f72edf-ef79-40a4-a464-1dbc8069e41f	draddy24	2/13/22 11:41	Fast service				en	sa	alrajhi	Loved it	en	love	Positive	App Store	0	0	0
App Store	9a1683e8-200c-4bce-b6c8-03741596688a	No-mercy123	2/4/22 7:39	Very nice app				en	sa	alrajhi	Very nice app and easy to use Thank you so much	en	nice app easy use thank much	Positive	App Store	0	0	0
App Store	6e61592f-5eb8-4754-a8d3-b21a11cd5ec4	general4u11	2/3/22 17:53	سلطان عبدالرحمن العرفج				en	sa	alrajhi	Excellent, A wonderful bank with advanced and easy services.	en	excellent wonderful bank advance easy service	Positive	App Store	0	0	0
App Store	dfe060f5-5752-4ff4-8657-3267b1a9b6fe	Mayfaahad	9/16/23 14:59	Best bank future bank				en	sa	alrajhi	Smartest easiest banking Application	en	smart easy bank application	Positive	App Store	0	0	0
App Store	9048168e-706a-423f-a31b-08d163b06739	heeera	9/10/23 18:17	👍🏻				en	sa	alrajhi	The best bank app in the whole entire wide world ððð»	en	best bank app whole entire wide world	Positive	App Store	0	0	0
App Store	a2378dee-0c0d-497f-ab5e-8b7efe260184	To0o8y	8/12/23 13:16	Best banking app				en	sa	alrajhi	Alrajhi bank one of the best banks in the world, and they have nice e-services . Thank you alrajhi	en	alrajhi bank one best bank world nice eservices thank alrajhi	Positive	App Store	0	0	0
App Store	15a0d6ef-4114-468a-8b94-aae1097a850e	Bilal Sami 76	5/21/23 12:58	Rajhi App				en	sa	alrajhi	Mobile app is secure & user friendly	en	mobile app secure user friendly	Positive	App Store	0	0	0
App Store	3bddd04f-4855-45e7-a74b-1b69a0bdbfe7	JAA1960	5/16/22 18:45	Fast transfer to Philippines				en	sa	alrajhi	Good exchange rate and fast transfer	en	good exchange rate fast transfer	Positive	App Store	1	0	0
App Store	b5b10376-dccd-4e3e-b284-59933e05ee5f	Z7569	2/18/23 14:34	App shows system error , please try again later … how to fix it				en	sa	alrajhi	App shows system error , please try again later â¦ how to fix it	en	app show system error please try late fix	Negative	App Store	0	1	0
App Store	4d3b8ca5-044a-4374-ae3a-b22aaa5b1e7d	AlyBayoumi	6/28/22 20:39	The app is not working properly				en	sa	alrajhi	The app is always disconnected and very slow. The previous version was better, after the new update, the app is very disappointing	en	app always disconnect slow previous version good new update app disappoint	Negative	App Store	1	0	1
App Store	2f14b946-b1f6-4d4c-8661-d6fb05a17825	shakeelji	5/15/22 8:56	Just super bank				en	sa	alrajhi	Excellent experience with Alrajhi bank. Easy banking. Thanks alrajhi ð	en	excellent experience alrajhi bank easy bank thank alrajhi	Positive	App Store	0	0	0
App Store	21a26055-a95b-444b-8770-cfca5ed7cbef	shah Fayaz	5/5/22 16:26	Happy to part of this bank				en	sa	alrajhi	One of the great bank of Kas	en	one great bank kas	Positive	App Store	0	0	0
App Store	08c421b9-fd50-4154-89c5-33ad4ba79e13	alasmialasmi	4/28/22 18:22	Amazing				en	sa	alrajhi	As usual Alrajhi online is much better than most banks in Saudi Arabia	en	usual alrajhi online much good bank saudi arabia	Positive	App Store	0	0	0
App Store	679e310c-631d-4c4f-a82e-efe5a8b20e4f	addsdjgfddcgygvcf	4/28/22 10:49	Appreciation				en	sa	alrajhi	Very good and user friendly app	en	good user friendly app	Positive	App Store	0	0	0
App Store	57ad625f-d014-4de1-9f27-ece9a57b12f1	jamalshary	4/17/22 20:55	professional				en	sa	alrajhi	One of the best financial technology services	en	one best financial technology service	Positive	App Store	0	0	0
App Store	5276ca5f-b046-4b66-8f3d-733327f9d968	sohail talat	4/12/22 15:56	Amazing				en	sa	alrajhi	Best bank system and services	en	best bank system service	Positive	App Store	0	0	0
App Store	20cc6e4d-2fc1-40fb-8c04-f4165b0fe42b	aojaimy	4/3/22 23:51	Excellent application				en	sa	alrajhi	Keep up the good work.	en	keep good work	Positive	App Store	0	0	0
App Store	83b7986b-f97a-48be-8a89-af5fe5c792ed	m ilyas mhren	3/31/22 18:29	Good				en	sa	alrajhi	I like this app easy to use and specially the price is very good	en	like app easy use specially price good	Positive	App Store	0	0	0
App Store	3b8014bb-fc16-42c4-9b4c-e103f5722412	xxghadaxx	3/28/22 10:08	Much better than the old app				en	sa	alrajhi	Much better than the old app	und	much good old app	Positive	App Store	1	0	0
App Store	da3e9843-50c4-4067-a30e-ac7175bf0580	Alzuraiq	3/26/22 18:15	Excellent service thanks rajhi bank				en	sa	alrajhi	I enjoy this	en	enjoy	Positive	App Store	0	0	0
App Store	088105ae-6e9c-43ae-b2d1-67c659b7e140	M5f7	3/12/22 7:00	Excellent				en	sa	alrajhi	It is easy, and comfortable to use this app	en	easy comfortable use app	Positive	App Store	0	0	0
App Store	d5af4969-5686-417b-872d-4560534b017a	iamMSZ	2/28/22 16:20	This app has made my life much easier				en	sa	alrajhi	Awesome app â¤ï¸â¤ï¸	en	awesome app	Positive	App Store	0	0	0
App Store	ee425f43-10d9-45a2-a92b-09fce33ba1b5	Dr. Rou7	2/23/22 17:43	Thanks				en	sa	alrajhi	So easy, new options and nice design ðð¼	en	easy new options nice design	Positive	App Store	0	0	0
App Store	19b6f10a-dcb8-4355-8578-5a8e8d2991d9	Khizer35	2/16/22 16:00	Superb experience				en	sa	alrajhi	Friendly app	en	friendly app	Positive	App Store	0	0	0
App Store	80968372-a4e2-483a-9f41-bed6a1672ae4	eshakoor	2/1/22 13:22	Great Application				en	sa	alrajhi	Great application with outstanding user experience.	en	great application outstanding user experience	Positive	App Store	0	0	0
App Store	a37ee16e-28b7-428d-9fc8-ba2d6dd12c0c	iPhone 6+ ***	1/19/22 6:43	Great App				en	sa	alrajhi	Very friendly App to use. I love all its features.	en	friendly app use love feature	Positive	App Store	0	0	0
App Store	904f710e-9d93-4f31-9efa-ee4c306aa3fa	garnas0d	1/31/22 18:13	Thanks for everything				en	sa	alrajhi	Thanks again	en	thank	Positive	App Store	0	0	0
App Store	bf4ceb96-453c-48fb-a0f6-c720f5c52fe2	MTajammul	7/21/22 12:14	Very Good				en	sa	alrajhi	Customer/User Friendly	en	customeruser friendly	Positive	App Store	1	0	0
App Store	feb55fda-fc00-4d12-a478-0f2dbce3d9bd	#silentk-i-l-l-R	9/1/23 11:50	Crash				en	sa	alrajhi	Always crashes after sign in after update. All iphones same problem with application.	en	always crash sign update iphones problem application	Negative	App Store	0	1	0
App Store	6b9c43b7-c4ea-48bc-a6e5-5b37432dfc8d	mazin85	5/15/22 8:55	Excellent				en	sa	alrajhi	Excellent app and service. Easy to use .	en	excellent app service easy use	Positive	App Store	0	0	0
App Store	49d82237-e98d-4543-9985-257a7db4d9a4	meraj7109	5/1/22 21:56	To alrajhi bank love this bank				en	sa	alrajhi	Good bank all over saudi	en	good bank saudi	Positive	App Store	0	0	0
App Store	d5946f24-3c0c-4db6-833f-02282cbf98bb	s100su	4/30/22 13:38	The best Banking app ever				en	sa	alrajhi	The best Banking app ever I wish all bank do like this app	en	best bank app ever wish bank like app	Positive	App Store	0	0	0
App Store	68aa2bef-a65a-4d42-a571-3db502997770	Mohanned Salih	4/30/22 12:01	Satisfied				en	sa	alrajhi	Very friendly app.	en	friendly app	Positive	App Store	0	0	0
App Store	5fb5e228-6513-43cd-8f97-674c8c40e32c	koLoneL93	4/23/22 5:24	The best				en	sa	alrajhi	Best app comparing to other bank apps due to continuous updating.	en	best app compare bank apps due continuous update	Positive	App Store	0	0	0
App Store	567a293f-b6c9-492d-9724-4e1c9ba2f68b	Reeeeeeeeee5	4/23/22 1:11	Thank you alrajhi!				en	sa	alrajhi	Best app ever ððð I recommend this to everyone	en	best app ever recommend everyone	Positive	App Store	0	0	0
App Store	bb6e1d1a-835d-405b-aa80-e8952ba792e0	sameerind	4/16/22 19:26	Good banking system with good user friendly				en	sa	alrajhi	Good banking	en	good bank	Positive	App Store	0	0	0
App Store	0b523baf-60d9-49df-a257-7668712704d1	iim3koos	3/27/22 14:45	Very useful				en	sa	alrajhi	Itâs very useful easy to access	en	useful easy access	Positive	App Store	0	0	0
App Store	88306e16-9f06-4b93-9476-f467e76b6380	hsppyone123456789	3/13/22 4:42	Excellent				en	sa	alrajhi	Excellent application and easy to use	en	excellent application easy use	Positive	App Store	0	0	0
App Store	436c6435-c3a7-4653-8512-e29b5b58c4a4	seed1jed	3/12/22 20:36	It’s a great apps.				en	sa	alrajhi	I like this Apps, because itâs easy to use.	en	like apps easy use	Positive	App Store	0	0	0
App Store	1092da17-1191-494e-bc1d-217d98ce0b0c	Nasser Alsuhaimi	2/28/22 8:45	All very good				en	sa	alrajhi	Thanks for all things	en	thank things	Positive	App Store	0	0	0
App Store	6fed9fbb-063d-4bf6-83fa-d06837e3dcdf	نور٢٠٣٠	2/24/22 9:11	Amazing service				en	sa	alrajhi	Thanks to AlRajhiBank Awesome easy and fast service	en	thank alrajhibank awesome easy fast service	Positive	App Store	0	0	0
App Store	3ea32a3b-d140-4c06-a2f2-fd76450162f0	Fahad Khan Azmi	2/24/22 7:11	Easy to use and fast service				en	sa	alrajhi	I love this Al Rajhi Bank	en	love al rajhi bank	Positive	App Store	0	0	0
App Store	0e5e217d-9bdd-4d89-8276-3f2e54e789c3	mostafizR	2/23/22 7:32	Excellent				en	sa	alrajhi	Everything is perfect	en	everything perfect	Positive	App Store	0	0	0
App Store	28b65314-7563-4733-ade3-3ea50e26bc3e	Mr.JazzTaz	2/21/22 15:01	One of the best banking Apps				en	sa	alrajhi	Easy to use, secure , fast and updated. In pne word Accesssable!!!	en	easy use secure fast update pne word accesssable	Positive	App Store	0	1	0
App Store	8bfb1e34-e9e1-4dde-80ab-e6ad1de6d5a0	adeel makani	2/5/22 10:59	Perfect services				en	sa	alrajhi	10 out of 10. Using rajhi services for 14 yrs and proud to say they r the best	en	use rajhi service yrs proud say r best	Positive	App Store	0	0	0
App Store	a09e89f4-3ffc-4fcc-822e-0662b04d0bb6	sadeqalotaibi	2/1/22 8:08	Thank you				en	sa	alrajhi	Thank goodness for your help	en	thank goodness help	Positive	App Store	0	0	0
App Store	db95f073-0c95-48ec-af46-7c2c619f1b13	bdjdhev6273	1/20/22 14:13	My review				en	sa	alrajhi	Excellent app from bank	en	excellent app bank	Positive	App Store	0	0	0
App Store	8a3d2ce6-7cdb-4347-80ef-a7b2f6606968	Shariq A Q	1/12/22 18:53	The most loved app fir banking.				en	sa	alrajhi	Complete banking experience in your palm.	en	complete bank experience palm	Neutral	App Store	0	0	0
App Store	adc09371-b987-42bf-bfcc-473ce13868f5	moody salman 1966	10/29/22 20:40	On line service is great unlike branch visit				en	sa	alrajhi	Branch visit is terrible	en	branch visit terrible	Negative	App Store	1	0	0
App Store	d8abcbfd-a3fb-44ed-97a2-b1b64df8e13d	shafesha	10/4/22 16:53	Helpful				en	sa	alrajhi	I really enjoying the alrajhi application , itâ very helpful for me	en	really enjoy alrajhi application helpful	Positive	App Store	0	0	0
App Store	9aec9c19-54b6-4fa1-9e1e-5cc50cd9da97	sherbaz khan	5/21/22 13:06	International Transfer				en	sa	alrajhi	Al Rajhi Bank is very good regarding international transfer and local transfer.	en	al rajhi bank good regard international transfer local transfer	Positive	App Store	0	1	0
App Store	6bb85c55-0950-4e21-a1a2-da843b3a2716	Mwibrahim	9/18/22 16:41	Always asking to activate location				en	sa	alrajhi	I couldn't use the app without turning on location	en	couldnt use app without turn location	Neutral	App Store	0	1	0
App Store	c47283cd-5235-40dc-a3a7-f9c64f9779ee	Suhaib Alhasan	5/13/22 8:52	Excellent Bank and Best Service				en	sa	alrajhi	Excellent bank deals	en	excellent bank deal	Positive	App Store	0	0	0
App Store	c35690c6-99bb-430e-80e1-aca3540ba690	khan silent	5/11/22 16:04	Good service				en	sa	alrajhi	Very impressive experience	en	impressive experience	Positive	App Store	1	0	0
App Store	46b6f205-e772-4ee9-9339-5e0eacdc93ab	natasharice9	5/8/22 13:14	Account				en	sa	alrajhi	Easy excellent	en	easy excellent	Positive	App Store	0	0	0
App Store	65438960-fe99-40ef-8358-7f29d4d04891	qiyeph	4/29/22 13:33	Simple for sending or pay somthing Alhmadulillah				en	sa	alrajhi	TOP. Simple for sending or pay somthing Alhmadulillah	en	top simple send pay somthing alhmadulillah	Neutral	App Store	1	1	0
App Store	d24cb295-9b58-4a17-b836-1e478e0d66f2	hamid65gee	4/26/22 14:24	My review				en	sa	alrajhi	I am very happy to use mobile rajhi app	en	happy use mobile rajhi app	Positive	App Store	0	0	0
App Store	79b59d07-a9f8-43a5-ad1a-0a295bfb950c	nivtab	4/21/22 20:09	♥️				en	sa	alrajhi	Great application so easy to use	en	great application easy use	Positive	App Store	0	0	0
App Store	2d173d05-a0f7-4da0-b10b-2c7bef050c15	abdullah 1412	4/19/22 20:08	Excellent app				en	sa	alrajhi	Smooth ,easy and comfortable	en	smooth easy comfortable	Positive	App Store	0	0	0
App Store	19e1cc36-b211-4e48-9671-d168d040ffb9	Yasir rasool	4/4/22 7:32	AlRajhiBank online app				en	sa	alrajhi	Very user friendly and secure ð	en	user friendly secure	Positive	App Store	0	0	0
App Store	40eb4e0d-77bf-42dc-9321-5c19239d01c1	MFS-86	3/31/22 13:49	Fantastic app				en	sa	alrajhi	Fantastic app with the new features	en	fantastic app new feature	Positive	App Store	0	0	0
App Store	f229cec6-f911-460e-8238-729f6d938aca	maram1	2/27/22 10:14	Excellent banking application ❤️🤩				en	sa	alrajhi	Total satisfaction. Excellent design and easy to use. ððð	en	total satisfaction excellent design easy use	Positive	App Store	0	0	0
App Store	8c2379c1-2e36-49ed-8ec8-eeeb20592f79	AhmedAMG	2/27/22 5:53	Good experience				en	sa	alrajhi	Very much enjoying the app.	en	much enjoy app	Positive	App Store	0	0	0
App Store	2e9b8244-6aa3-4d4f-808f-59df1ccfe950	599782224	2/1/22 7:48	Excellent App				en	sa	alrajhi	This app demonstrates a real world class banking services .. keep rocking	en	app demonstrate real world class bank service keep rock	Positive	App Store	1	0	0
App Store	e414b22a-9ab0-45ae-b4f5-0b6ff5f2933c	Salamrk	1/20/22 15:20	Mobile Banking				en	sa	alrajhi	Very good Service	en	good service	Positive	App Store	0	0	0
App Store	8c46c8a7-5401-4d85-91ce-9a6a4a80f461	Hsamyh	1/9/22 15:27	Sales Management				en	sa	alrajhi	Fantastic bank	en	fantastic bank	Positive	App Store	0	0	0
App Store	ce52769b-e395-4e1d-88ae-e987b8afdad5	El Ghity	1/13/22 15:45	G				en	sa	alrajhi	Hardly can do any thing after update	en	hardly thing update	Negative	App Store	1	0	0
App Store	199cb959-cefd-43e7-b4a4-2314de6d32f1	Faraz Hunter	8/3/23 12:53	Al Rajhi app is wonderful				en	sa	alrajhi	Al Rajhi bank is wonderful i wish banks guys are also so wonderful	en	al rajhi bank wonderful wish bank guy also wonderful	Positive	App Store	0	0	0
App Store	2434ab0a-d506-4e17-a2c0-79f2455c7473	MohammedHarbi17	7/11/23 17:40	Great app				en	sa	alrajhi	Practical and easy to use	en	practical easy use	Positive	App Store	0	0	0
App Store	a4a639a1-f0d5-4ef0-86c9-337d2ca1789d	ماني11	6/25/22 17:38	Ios 16 doesnot support this application				en	sa	alrajhi	Please fix this issue. Al rajhi bank application doesnot support ios 16	en	please fix issue al rajhi bank application doesnot support ios	Negative	App Store	0	1	0
App Store	41236c44-2710-4fd3-acc4-d072c8e27b96	Wsiddiqui49	7/9/23 10:10	Sesion time out				en	sa	alrajhi	If i ho yo transfer or i go to my account information message apeqr sesion time out and log in again again and again keep showing message sesion timenout log in again	en	ho yo transfer go account information message apeqr sesion time log keep show message sesion timenout log	Neutral	App Store	0	1	0
App Store	dbe92c9a-05d4-44e5-bc6a-6e04f3aa7dcc	uoue	3/22/23 23:18	New update login problem				en	sa	alrajhi	With the new update I canât login!!! I have tried to login on the website it works but not in the app after the new update	en	new update cant login try login website work app new update	Negative	App Store	0	1	0
App Store	061ce0da-8b1a-4146-85dd-d56ed8730187	expatryne	5/5/22 15:28	Best app				en	sa	alrajhi	Very reliable and easy to use.	en	reliable easy use	Positive	App Store	0	0	0
App Store	3280a123-e798-4a63-8046-7e9e6b7b1655	Ҩцјјдя Јї	4/29/22 17:47	Fantastic app				en	sa	alrajhi	Itâs very easy to use	en	easy use	Positive	App Store	0	0	0
App Store	60882502-e97c-4af5-a886-7719bfa12fd2	alaabalela	4/28/22 10:59	Great				en	sa	alrajhi	I love this app, makes life easier	en	love app make life easy	Positive	App Store	0	0	0
App Store	a4a3b111-6ee9-49ca-a9f8-274dd1e7cd48	ITConsultant89.sa	4/28/22 8:17	Best banking app				en	sa	alrajhi	All facilities are user friendly ð	en	facilities user friendly	Positive	App Store	0	0	0
App Store	4b1f0daa-820d-4dfb-a373-17025fbb247d	AbuRenadNodi	4/27/22 12:25	Best app-bank				en	sa	alrajhi	The best bank-app experience up to moments	en	best bankapp experience moments	Positive	App Store	0	0	0
App Store	54758c5c-8180-4abc-bc86-22ada13ec7c8	Rbbsh	4/26/22 12:32	Thank you so much				en	sa	alrajhi	Will Done	en	do	Positive	App Store	0	1	0
App Store	2b089b06-2ff1-4a68-be08-805d33ed9be1	Waleed Eldesouki	4/27/22 0:23	Excellent Service				en	sa	alrajhi	Thank you for an exceptional type of e-service provided to every customer. I can say that itâs exceeding global standards (easy to access, customer friendly, safe to use).	en	thank exceptional type eservice provide every customer say exceed global standards easy access customer friendly safe use	Positive	App Store	0	0	0
App Store	c0baaffd-54a1-48af-b040-7da198d65222	AnserDaad	4/26/22 7:10	Nice App, Nice Improvements				en	sa	alrajhi	Well improved application	en	well improve application	Positive	App Store	0	0	0
App Store	3308f94b-3d0c-4050-a47c-bac6d5d44c09	Fhggfd	4/25/22 0:58	Fabulous Customer Experience				en	sa	alrajhi	The best online banking in the region	en	best online bank region	Positive	App Store	0	0	0
App Store	ef72d210-cdde-4bdc-ae2d-361b0acf3d27	hdrhififjrnsmslapajsjsk	4/19/22 6:46	I love it				en	sa	alrajhi	Awesome app.. please add services for updating iqama in the app. And no need to go to bank	en	awesome app please add service update iqama app need go bank	Positive	App Store	1	0	0
App Store	ba0529a9-1771-4d30-8454-e7cf54a64f9c	hami855	4/8/22 9:59	Very well done				en	sa	alrajhi	I just love the smoothness of the app â¦	en	love smoothness app	Positive	App Store	0	0	0
App Store	21ecf54c-33c2-4827-a7c8-38f4b03fe72a	Firas Attieh	4/17/22 0:49	High Quality Services				en	sa	alrajhi	Very good service and experience ðð»	en	good service experience	Positive	App Store	0	0	0
App Store	492df878-0024-492d-9ca5-6546c542bf7f	Hanodahnani	4/6/22 21:24	Amazing				en	sa	alrajhi	Smooth without any troubles	en	smooth without trouble	Positive	App Store	0	0	1
App Store	6e61209b-bc03-44a2-8616-31e046269679	Sacred Power	3/20/22 17:02	Awesome				en	sa	alrajhi	So attractive and friendly	en	attractive friendly	Positive	App Store	0	0	0
App Store	f0462a2a-f34b-4980-9b0d-6aa8e5369642	Jawaher Alsaif	3/19/22 19:20	The best !				en	sa	alrajhi	Great, easy and fast transfer. Thank you	en	great easy fast transfer thank	Positive	App Store	0	0	0
App Store	2b0e0429-c585-41d1-9615-2016c595b414	Ehabgebaly	3/16/22 11:46	The best banking application				en	sa	alrajhi	This is the best mobile banking app ever seen	en	best mobile bank app ever see	Positive	App Store	0	0	0
App Store	0a2d4723-2019-4bae-8448-f8fd4489e41b	equb	2/28/22 17:51	Nice application and very helpful				en	sa	alrajhi	Nice application and very helpful	en	nice application helpful	Positive	App Store	0	0	0
App Store	be9d1034-486e-447f-b124-beca35ddfc0a	Saadaj90	2/15/22 19:25	Fantastic				en	sa	alrajhi	Itâs greatest than old App	en	great old app	Positive	App Store	0	0	0
App Store	49c17f4e-f8f2-46cb-a521-a88bb85ac14a	nursmaram94M	2/14/22 11:37	I like it				en	sa	alrajhi	Easy to use and fast ð	en	easy use fast	Positive	App Store	0	0	0
App Store	8adaad24-3b31-4e63-98cf-7c80ff9e0bba	Rasheed 99	1/5/22 11:27	Alrajhi app				en	sa	alrajhi	Great app, great service, i highly recommend it	en	great app great service highly recommend	Positive	App Store	0	0	0
App Store	a27e33ee-94e5-43cb-8238-28bda3fc0485	cnajjdns	1/20/22 16:05	Good				en	sa	alrajhi	Can be better and faster	en	good fast	Positive	App Store	0	0	0
App Store	f0d92ada-a2cd-44df-8cd0-dc87596ec27a	Wail Esmail	8/14/23 11:24	Thank you				en	sa	alrajhi	Thanks to Alrajhi Bank Iâm very satisfy with you	en	thank alrajhi bank im satisfy	Positive	App Store	0	0	0
App Store	bd166c4e-f3b5-4ccc-aae1-74eb5d7c137a	Amrit bedair	8/22/23 13:06	Excellent app from excellent bank				en	sa	alrajhi	Happy to have alrajhi mobile app	en	happy alrajhi mobile app	Positive	App Store	0	0	0
App Store	b4fa8aae-567f-446d-8432-333dbcafec40	cafgvf	5/28/23 7:56	Best App				en	sa	alrajhi	Actually this is the Best Bank App Ever itâs Easier and fun to use	en	actually best bank app ever easy fun use	Positive	App Store	0	0	0
App Store	d28611c1-f322-4828-9983-d8ea6392c783	‼️👎🏿	3/23/23 17:42	Review				en	sa	alrajhi	Terrible,not user friendly at all! Data used to assess need corrupted, not accurate and statistically not significant previous versions much better â¼ï¸excellent reviews provided by bank employees	en	terriblenot user friendly data use assess need corrupt accurate statistically significant previous versions much good excellent review provide bank employees	Positive	App Store	1	0	0
App Store	5f78276b-77b7-4ce3-bce1-9c7ed5b0131d	ابو نواف١٧٣٧	4/29/22 1:43	Good				en	sa	alrajhi	Very beautiful and save you time and effort	en	beautiful save time effort	Positive	App Store	0	0	0
App Store	828cff5b-4864-4a75-a02e-19ca8411b522	Kunnel Antony	4/28/22 11:26	Kunnel Antony				en	sa	alrajhi	Great app, works well even while traveling abroad.	en	great app work well even travel abroad	Positive	App Store	0	0	0
App Store	5775144a-bca5-4237-af4d-29adce0d8e94	Dhafer1234	4/27/22 9:43	Good				en	sa	alrajhi	Good application n good bank for easy services	en	good application n good bank easy service	Positive	App Store	0	0	0
App Store	138dba27-c9bc-41f8-9ebd-3ea4a589885f	ahmedsaid1967	4/25/22 19:06	Appreciation				en	sa	alrajhi	It is really a great bank to deal with. Thanks for your great efforts.	en	really great bank deal thank great efforts	Positive	App Store	0	0	0
App Store	ff2ba996-b6eb-4a51-81b3-0f17018b9192	beeeeeera	4/13/22 12:46	Smart				en	sa	alrajhi	Itâs really smart app and save time	en	really smart app save time	Positive	App Store	0	0	0
App Store	2c86f741-807d-4902-a4f0-97b6ed491cfe	shoo117	3/23/22 8:08	Service survey				en	sa	alrajhi	Good service. Keep it up.	en	good service keep	Positive	App Store	0	0	0
App Store	559097e6-2c6f-4620-a6b5-600ff052afc5	77mm66	3/23/22 23:34	New update is bad				en	sa	alrajhi	The update before was good , when the main menu was on the right, it was easier and better in user experience..	en	update good main menu right easy good user experience	Positive	App Store	0	0	0
App Store	e25d8eaf-9337-44a8-89c3-63ee2fa3e55c	Shah Zaad	3/21/22 9:54	Best Banking Services				en	sa	alrajhi	Love Rajhi and its online App for Daily use and financial transactions	en	love rajhi online app daily use financial transactions	Positive	App Store	0	1	0
App Store	d805ba1c-fcd3-45af-bd72-82a7bbff34ce	H zayed	2/28/22 12:43	Good app				en	sa	alrajhi	Id does what it says with minimal glitches	en	id say minimal glitches	Neutral	App Store	0	1	1
App Store	1034acd9-6bce-4364-a0f1-de6729164ac9	Nizum	2/28/22 21:11	* * * * *				en	sa	alrajhi	Really itâs better than before	en	really good	Positive	App Store	0	0	0
App Store	3060a219-6cda-4b5d-a4e7-306f57c84be9	wikigulrez	2/15/22 10:41	Best				en	sa	alrajhi	The service is fastest and best by now. And all ease of access	en	service fast best ease access	Positive	App Store	0	0	0
App Store	a10e3c62-2a50-4570-bb9e-f80295db4fc1	IEM 01	1/13/22 17:57	II				en	sa	alrajhi	Very quick and accessible. Excellent service	en	quick accessible excellent service	Positive	App Store	0	0	0
App Store	382bc3e7-938a-4adf-ac06-c027043c47ef	SaadMohd14	7/13/23 23:19	Best bank app				en	sa	alrajhi	This app never let me down .. great work Al-Rajhi Bank.	en	app never let great work alrajhi bank	Positive	App Store	1	0	0
App Store	7f8e63bb-2f34-4776-b550-9637e1654311	SyedFarazAlii	6/16/22 7:18	Best Banking Experience				en	sa	alrajhi	Al Rajhi has the best banking service. Very smooth experience. Love it.	en	al rajhi best bank service smooth experience love	Positive	App Store	0	0	0
App Store	67ebbce3-451e-4ce6-9259-c321201ddcb9	Siddiqui.aw	1/4/23 20:14	Worst service				en	sa	alrajhi	Regret changing my account to Alrajhi, when enquired about my pending finance request their representative informed itâs been sent to my boss for his feedback ð¤·ââï¸ They kept asking for documents even it was submitted several times Their system is down most of the time, rude representatives in the bank. Opted for english still all recorded response is in Arabic. Going back to my old ban…	en	regret change account alrajhi enquire pending finance request representative inform send boss feedback keep ask document even submit several time system time rude representatives bank opt english still record response arabic go back old bank	Negative	App Store	1	0	0
App Store	bfea5816-8efe-425f-b584-ba55a4d95c85	siraj shahid	5/5/22 16:12	Really nice and convenient app				en	sa	alrajhi	Really nice and convenient app	en	really nice convenient app	Positive	App Store	0	0	0
App Store	0a9ea6f0-3424-4f37-b804-8420aa463a9d	Sajid R Baloch	4/25/22 6:25	Best Banking App				en	sa	alrajhi	Best Banking App experience, Fast, Accurate, Safe and convenient.	en	best bank app experience fast accurate safe convenient	Positive	App Store	0	0	0
App Store	c90f49ce-9017-4266-89c9-1d617fc3a2bf	Anas Abdullah$	3/12/22 14:34	Anas Abdullah$				en	sa	alrajhi	Great application in which include every things Thanks	en	great application include every things thank	Positive	App Store	0	0	0
App Store	0206ce28-663e-49c3-8b06-fa124c22709f	saleh.,:)	2/27/22 13:51	Great bank application				en	sa	alrajhi	Fast&Save	en	fastsave	Neutral	App Store	0	0	0
App Store	ad5cdaf2-e41e-4bbd-920c-1177f9942f21	جلال شاہ	1/30/22 5:24	Very nice				en	sa	alrajhi	Itâs too good and too easy Iâm very satisfied thanku alrajhiâ¤ï¸	en	good easy im satisfy thanku alrajhi	Positive	App Store	0	0	0
App Store	e6bc090c-dda1-4fad-8654-431c98763234	Tilmisani	2/23/22 15:29	Alrajhi bank				en	sa	alrajhi	It has good and fast service	en	good fast service	Positive	App Store	0	0	0
App Store	d08ec0a8-9c58-4607-b5b4-f9ffc724ce6c	yazeedfaiz	1/27/22 8:54	Best Bank application ever				en	sa	alrajhi	Best Bank application ever	en	best bank application ever	Positive	App Store	0	0	0
App Store	32078b92-1e01-4211-8ef5-6675723bb14d	SAFEER Ali Thiruthikad	1/24/22 9:41	Great				en	sa	alrajhi	User friendly nd fast responseâ¦Kudos	en	user friendly nd fast responsekudos	Positive	App Store	0	0	0
App Store	5aab5c1e-6ad4-4908-a0b4-73f089c898e0	عثمان فتحي	1/15/22 16:23	Nice and easy to use this app				en	sa	alrajhi	Nice and easy to use this app	en	nice easy use app	Positive	App Store	0	0	0
App Store	f2eb9575-925f-47f6-8dc3-57021fca476f	kh msm	1/13/22 12:49	Review				en	sa	alrajhi	Simple and professional	en	simple professional	Positive	App Store	0	0	0
App Store	ac998a9e-9f6c-42ac-a1f5-ff6d2f04d00c	M.Alhareeqi	1/3/22 16:07	You are the greatest				en	sa	alrajhi	You are the greatest	en	great	Positive	App Store	0	0	0
App Store	5253b566-e1f7-4b34-b3aa-ee4ff4f64e1d	FATMI dZ	5/19/23 13:54	PERFECT APPLICATION .				en	sa	alrajhi	Can do everything from this application. Be safe	en	everything application safe	Neutral	App Store	0	0	0
App Store	9e6ca9d4-6565-4aa9-be26-2ef4cc8d5846	Ibrar Sheikh	2/16/23 15:03	Excellent service				en	sa	alrajhi	All services are excellent Thanks	en	service excellent thank	Positive	App Store	0	0	0
App Store	b0c05b25-5035-4d8c-89cb-4a58aae9c72d	coffee2code	4/3/23 16:09	Not stable and too buggy				en	sa	alrajhi	I opened my account then I am not able to login, the app just freezes without any response. It is really shame for Alrajhi to deliver such garbage app	en	open account able login app freeze without response really shame alrajhi deliver garbage app	Negative	App Store	1	1	1
App Store	f9847846-b044-426d-8af2-9c41ecae8759	baloch.irfan	11/18/22 7:30	Amazing Banking services				en	sa	alrajhi	One of the best banking service. Huge love	en	one best bank service huge love	Positive	App Store	0	0	0
App Store	3d11d8fa-b139-4965-9318-1eeefc44fe23	Hanin AlB	11/3/22 16:58	The Number One Always				en	sa	alrajhi	AlRajhi Bankâ¤ï¸	hi	alrajhi bank	Neutral	App Store	0	0	0
App Store	32ce3f90-9621-4c36-a6c7-c182195e4a75	A. A. Abdulaziz	5/16/22 14:58	Satisfied				en	sa	alrajhi	Fantastic service	en	fantastic service	Positive	App Store	0	0	0
App Store	a9006f55-9659-4433-9776-46f517c7b0ad	gbarsoum	5/13/22 8:42	Thanks				en	sa	alrajhi	VIVA. KSA .Thanks for your effort to make our life easy .truely We are very thankful .Ideal services ðºðºðºðº.	en	viva ksa thank effort make life easy truely thankful ideal service	Positive	App Store	0	0	0
App Store	e456ba5c-f5de-483a-8816-7563dccdba9b	moibmo85	4/28/22 21:51	I like rajhi bank so much				en	sa	alrajhi	Great bank	en	great bank	Positive	App Store	0	0	0
App Store	b2bde31e-fdf5-4b84-8489-e74d16a313f8	MonirUAhmed	4/28/22 16:14	Great app				en	sa	alrajhi	Like the app very much. Has made life easy in Saudi Arabia	en	like app much make life easy saudi arabia	Positive	App Store	0	0	0
App Store	61d1abeb-ed00-49b4-8311-1cce68f1e664	نون ابو عيون	4/27/22 23:53	Very bad version				en	sa	alrajhi	The new version is miserable. The previous version was easier to log on while the new one is harder & always timed out & kick you out.	en	new version miserable previous version easy log new one hard always time kick	Negative	App Store	0	1	0
App Store	20eaaf62-a0f8-4974-be26-cfaf1ff35f99	mahibub	4/25/22 16:48	Good experience				en	sa	alrajhi	Very fast	en	fast	Neutral	App Store	0	0	0
App Store	2b9caab1-480b-45e6-a6e7-44a4876e89bd	R.Jacob	4/25/22 6:48	rose				en	sa	alrajhi	Very fast and reliable	en	fast reliable	Positive	App Store	0	0	0
App Store	f67b0ee7-8d7e-494e-a666-c9db645d5c81	Abdullah-Q	4/24/22 19:45	Great banking app				en	sa	alrajhi	All you need is here.Great banking app	en	need heregreat bank app	Positive	App Store	1	0	0
App Store	8b043200-de86-4791-a432-e6bd1ed68183	ghythhvff	4/15/22 18:53	Excellent services , well done				en	sa	alrajhi	The best bank in Middle East	en	best bank middle east	Positive	App Store	0	0	0
App Store	830f587e-a023-4b3e-a1aa-3a09c0336184	lulwahS	4/7/22 18:51	Great!				en	sa	alrajhi	Love the new platform and the ease of using it	en	love new platform ease use	Positive	App Store	0	0	0
App Store	b72eaa0f-c5f7-4942-ae26-5a1345899557	ابو ميلاد	3/27/22 7:04	Great job				en	sa	alrajhi	Excellent options and operations blus good service	en	excellent options operations blus good service	Positive	App Store	0	0	0
App Store	83febfba-68c9-457a-860a-980d408037ea	7amood 1991	3/21/22 12:40	Rajhy apps				en	sa	alrajhi	I like your apps , easy to use	en	like apps easy use	Positive	App Store	0	0	0
App Store	2d783433-ab6b-4c7e-8b99-3803de72be2a	RAKAN ALKARRI	3/5/22 6:05	Great app				en	sa	alrajhi	Thank you for great service	en	thank great service	Positive	App Store	0	0	0
App Store	35e16e5f-bf10-444b-8122-fd006fdd0dce	Abdul wahed rabbani mohammed	2/3/22 14:11	Excellent				en	sa	alrajhi	Itâs so easy to transfer with alrajhi app .. I loved it	en	easy transfer alrajhi app love	Positive	App Store	0	0	0
App Store	89084c67-c1bd-4098-8451-a3774e32d2ec	amd_0409	1/27/22 7:54	Reliable				en	sa	alrajhi	I enjoy and trust this app	en	enjoy trust app	Positive	App Store	0	0	0
App Store	7401457e-9104-4074-96e7-e1a58c5f2aa5	Arifsx01	1/17/22 8:24	Excellent Experience				en	sa	alrajhi	Well organized	en	well organize	Positive	App Store	0	0	0
App Store	564add60-73fa-4226-9525-445a1de5a5cb	morpheous80	9/9/23 6:42	Alrajhi bank app				en	sa	alrajhi	I like the app easily to deal with	en	like app easily deal	Positive	App Store	0	0	0
App Store	d6822c34-b028-4c52-b5b3-56c2259ad2e5	0000007£€*>>~~	7/13/23 14:37	AlRajhi Bank app.				en	sa	alrajhi	Itâs easy to use and helpful.	en	easy use helpful	Positive	App Store	0	0	0
App Store	8833dccc-a5b2-4117-90d0-81a3fa9a8bc0	Muhammad_Daniyal	9/5/23 22:16	App crashes after login				en	sa	alrajhi	Unable to use the app as it crashes immediately after login. It's been 6 days.	en	unable use app crash immediately login days	Negative	App Store	0	1	0
App Store	4535e223-f91a-4f16-a561-76c7c9454546	Tawfeeg Ahmed	5/16/22 19:42	Great App				en	sa	alrajhi	The Greatest bank application ever .. Manageable & easy to use	en	great bank application ever manageable easy use	Positive	App Store	0	0	0
App Store	556c21a5-2aa4-44c8-acec-af054073214c	Bario222	9/29/22 13:28	No privacy				en	sa	alrajhi	They ask for your location to be activated all the time to use the app! Why they need our location!	en	ask location activate time use app need location	Neutral	App Store	0	1	0
App Store	8315360b-0a3d-41c9-8298-df9af5a02077	Yassin Yasser	7/1/22 20:42	Last update				en	sa	alrajhi	Transfer issues with the last update	en	transfer issue last update	Neutral	App Store	0	1	0
App Store	0efcaaf0-4896-495a-924f-0b13f160f43c	mistrick john	5/14/22 4:39	Good and fast				en	sa	alrajhi	Good service and fast	en	good service fast	Positive	App Store	0	0	0
App Store	c7d1c9ac-61a0-48b9-aef1-223006494fbc	alnanah	5/13/22 16:10	Swift				en	sa	alrajhi	Friendly no delay	en	friendly delay	Positive	App Store	1	0	1
App Store	d905bf55-464c-4378-8eae-6a090db34937	Elhashmie	5/9/22 3:12	Best bank				en	sa	alrajhi	The best of the best bank I ever deal with online	en	best best bank ever deal online	Positive	App Store	0	0	0
App Store	89bf0170-e0e0-4288-b769-759fb3369b7d	abuabbudi	4/28/22 7:41	Abuabbudi				en	sa	alrajhi	Thanks very well new looking	en	thank well new look	Positive	App Store	0	0	0
App Store	2cf1e2bf-e921-49ad-9aa0-1db0d23c0b62	Sarajajajjbb	4/26/22 18:41	Good				en	sa	alrajhi	Always Rajhi apps feature surprises me	en	always rajhi apps feature surprise	Positive	App Store	1	0	0
App Store	9cdadae5-22b4-462e-9478-5a578c6d5217	MOGADID	4/24/22 17:33	Gold services				en	sa	alrajhi	Best service, Thanks	en	best service thank	Positive	App Store	0	0	0
App Store	36ce8a01-c039-4f30-81d6-905b1fca4ace	Mesh3l_777	4/21/22 16:41	Amazing App				en	sa	alrajhi	Thank you Alrajhi bank for amazing experience	en	thank alrajhi bank amaze experience	Positive	App Store	0	0	0
App Store	dc58319b-7443-4963-89f0-93a0b3695702	Abniaf454	4/22/22 15:17	Application				en	sa	alrajhi	Very good application and it is smooth to use.	en	good application smooth use	Positive	App Store	0	0	0
App Store	024f34c0-7fad-4f28-8371-fa4914e1332e	sarahkhayay	4/12/22 9:33	Easy to use				en	sa	alrajhi	Excellent. Easy to use	en	excellent easy use	Positive	App Store	0	0	0
App Store	9fb76d0d-ea5a-4d84-98ae-c4c353696911	erwinneri	3/29/22 15:27	International Transfer				en	sa	alrajhi	Excellent application using this app.	en	excellent application use app	Positive	App Store	0	0	0
App Store	cf4660db-0d94-4f5b-acef-739c7daa1bed	Hhaami	3/27/22 6:19	Best bank with great services				en	sa	alrajhi	I have experienced best banking with alrajhi	en	experience best bank alrajhi	Positive	App Store	0	0	0
App Store	f8cce8f6-2f19-4d52-a9c5-af8688bfd4b2	Naaadaaa5	3/7/22 14:13	Impressive				en	sa	alrajhi	Very good app thank you	en	good app thank	Positive	App Store	0	0	0
App Store	006018c9-d6e1-4e59-9a50-ff7e3be70ff8	Jazii Jadoon	2/16/22 22:02	Smooth work 🥰🥰				en	sa	alrajhi	Helpful	en	helpful	Positive	App Store	0	0	0
App Store	a2aa5e4c-7c03-4bf3-a06e-dcb2d234fb48	Raghad 1	2/1/22 17:47	Good app and easy to use				en	sa	alrajhi	Good app and easy to use	en	good app easy use	Positive	App Store	0	0	0
App Store	243e4468-3637-447f-8e3d-f5cac182f330	qwernjdndh643	1/25/22 16:57	Thank you very much				en	sa	alrajhi	Itâs the best banking app ever.	en	best bank app ever	Positive	App Store	0	0	0
App Store	5ba0d19b-1ed5-441e-9d9e-2522c7e14445	pervez.prince2786	1/15/22 4:50	Very easy and safe banking				en	sa	alrajhi	Five star	en	five star	Neutral	App Store	1	0	0
App Store	9f34435f-0466-4dc0-8f38-6fa1d64b7bfa	Fa23had	1/7/22 18:36	Absolutely 5 stars				en	sa	alrajhi	Best banking app , fast efficient and secure	en	best bank app fast efficient secure	Positive	App Store	0	0	0
App Store	bc130622-e657-419b-80c2-aa766ef90249	Sta so nikA	9/19/23 15:03	Beneficiary problem				en	sa	alrajhi	I am trying to add beneficiary and at the end when full fil the whole details itâs says there is general data error what to do I donât know ð¤	en	try add beneficiary end full fil whole detail say general data error dont know	Negative	App Store	0	1	0
App Store	10e83c22-02e4-4573-9db4-11cedbdc6850	thamer2011	8/3/23 19:09	Amazing experience				en	sa	alrajhi	Thanks Alrajhi bank for such an amazing online services ðð»ðð»ðð»ðð»ðð»	en	thank alrajhi bank amaze online service	Positive	App Store	0	0	0
App Store	2f1ba324-89d5-484a-853a-cfd31f7e34b5	AsReNaNa	9/6/23 5:30	App log out automatically				en	sa	alrajhi	Whats the solution	en	whats solution	Neutral	App Store	0	1	0
App Store	2eea8934-ec36-40be-9c69-316dd6dbe19f	aaassi82	7/26/23 15:09	The best bank app				en	sa	alrajhi	The best Saudi bank application ever. Thank you!	en	best saudi bank application ever thank	Positive	App Store	0	0	0
App Store	b687fd43-cdec-4fc9-ba19-6516d9e490b5	M3d_Abdullah	5/10/22 18:30	Perfect 👍🏽				en	sa	alrajhi	It's becoming more easily	en	become easily	Neutral	App Store	0	0	0
App Store	da111775-1c13-4d41-a927-6da940328c3e	mdr ksa	5/26/22 19:42	Application keep hanging				en	sa	alrajhi	Application keep hanging all the time even unable to transfer money very bad experience	en	application keep hang time even unable transfer money bad experience	Negative	App Store	1	1	1
App Store	6aa01747-9e92-46c0-8055-42a1055684f9	zhrama0c	4/26/22 22:36	Opinion				en	sa	alrajhi	Great version	en	great version	Positive	App Store	0	0	0
App Store	be4c3668-b50f-41c1-9dfb-065e43d08bc5	iqbal2912	4/25/22 20:38	Good				en	sa	alrajhi	Very good experience thank you	en	good experience thank	Positive	App Store	0	0	0
App Store	3d706137-e4c7-4703-acd4-9069ecd6f8fa	abu riyyan	4/7/22 22:15	Satisfying				en	sa	alrajhi	Very good experience with new AlRajhi banking system	en	good experience new alrajhi bank system	Positive	App Store	0	0	0
App Store	4a5fb5a3-df10-4807-a61d-0b97136de5cc	Tala2009	3/30/22 15:35	What a great bank				en	sa	alrajhi	Keep it up guys	en	keep guy	Positive	App Store	0	0	0
App Store	3fc071b5-c5bf-4b1c-b20b-bf2e3878590c	Mnntazz	3/22/22 19:13	Easy				en	sa	alrajhi	Keep it like this	en	keep like	Neutral	App Store	0	0	0
App Store	9e9c598d-8238-4bd8-ae3e-3b2a10a38a00	aboahmad_78	2/27/22 6:07	Nice application				en	sa	alrajhi	Excellent app, always improving	en	excellent app always improve	Positive	App Store	0	0	0
App Store	f8b3fd3a-b962-4848-9d64-fdaf385e19f4	alkhaled1988	1/28/22 13:24	Great app				en	sa	alrajhi	Very simple and Easy to use	en	simple easy use	Positive	App Store	0	0	0
App Store	6ef3d464-6109-468f-8d95-73ec254bced4	Abdul-MiMi	2/20/22 16:32	Nothing to say				en	sa	alrajhi	This app keeps annoying user to do review. Here we are.	en	app keep annoy user review	Negative	App Store	1	0	0
App Store	f7c2546c-7c9e-4b22-b600-b1f72052a18b	shahahdddddddd	1/27/22 21:03	Good app				en	sa	alrajhi	Good app but have a bad issue with stc wifi	en	good app bad issue stc wifi	Negative	App Store	1	0	0
App Store	fc2e0cbc-c9a0-4b5d-b6d1-fc0f5969cd77	ilyas aim	1/27/22 11:29	Perfect				en	sa	alrajhi	Very good band easy transfer I m happy	en	good band easy transfer happy	Positive	App Store	0	0	0
App Store	b4520974-8ac1-4f0e-85a4-3fbfd0338c1b	S Makky	1/20/22 15:23	Review				en	sa	alrajhi	Good experience using this simple App	en	good experience use simple app	Positive	App Store	0	0	0
App Store	12e97728-451e-491e-a353-44e341213730	AUAVIP	12/9/22 7:51	App				en	sa	alrajhi	Easy way for you	en	easy way	Neutral	App Store	0	0	0
App Store	3f54bc4a-eddd-4532-bfd5-754db3c5c807	Tariq0009	9/8/23 20:50	App bug				en	sa	alrajhi	After 1 second app close automatically and get message that need to log in again	en	second app close automatically get message need log	Negative	App Store	0	1	0
App Store	d0a9cca1-c091-41fa-9002-7617c944d510	abdulaziz alshiti	7/30/23 0:28	App				en	sa	alrajhi	App is easy and good to view all the services	en	app easy good view service	Positive	App Store	0	0	0
App Store	6bd8a1f8-ea64-41ff-9f62-c10c0e3120c2	latifah jassem	5/5/22 1:38	Applecation				en	sa	alrajhi	Itâs too easy	en	easy	Neutral	App Store	0	0	0
App Store	13d7a05f-e4c4-4c75-8d0b-5b2cb327bc4d	amer.89	4/27/22 4:52	Alzahrani				en	sa	alrajhi	Itâs an amazing app of Al Rajhi Bank All what you need in one place.	en	amaze app al rajhi bank need one place	Positive	App Store	0	0	0
App Store	677cba4c-7840-4366-b885-770ec7698164	Lubnafurqan	4/26/22 14:14	Excellent Application				en	sa	alrajhi	I am enjoying. Excellent Application.	en	enjoy excellent application	Positive	App Store	0	0	0
App Store	60a1c578-dcf1-474c-af6d-673be86033bd	Abu Rayan 2016	4/26/22 8:05	Seamless Banking Experience				en	sa	alrajhi	Seamless access and transactions. Simplicity in its nature.	en	seamless access transactions simplicity nature	Positive	App Store	0	0	0
App Store	80e26ab6-bc9d-48e4-a84a-dd0ca7e8d140	AbuAzoz211	4/18/22 23:44	Very useful app				en	sa	alrajhi	Thanks for the developers â¤ï¸	en	thank developers	Positive	App Store	0	0	0
App Store	32f7b356-68c0-41d4-b7b4-5f4ce06a4da0	pop kamal	3/30/22 13:09	Pop kamal				en	sa	alrajhi	Great experience with alrajhi Mobil app, only exchange rate need to be reviewed.	en	great experience alrajhi mobil app exchange rate need review	Positive	App Store	1	0	0
App Store	722481ea-6cb6-4324-8a79-69fea78fca05	Lamonaty84	3/14/22 6:54	Excellent				en	sa	alrajhi	Very easy and smart app	en	easy smart app	Positive	App Store	0	0	0
App Store	dbfeb770-ae12-480d-b151-a0aa32ddb208	Mohamed Gabal88	2/26/22 21:09	Very good app				en	sa	alrajhi	Very easy very good to use i like it	en	easy good use like	Positive	App Store	0	0	0
App Store	d8ec8cc7-a5e6-420a-ac24-18b9abfea2db	Riyan90210	1/8/22 17:11	Outstanding				en	sa	alrajhi	Comprehensive services	en	comprehensive service	Neutral	App Store	0	0	0
App Store	02cf2f21-bb05-4073-8750-be5d6b1c1e32	New update please check it	1/1/22 3:59	!!!!!!				en	sa	alrajhi	Just imagine someone calling you on your personal phone and tells you he takes it from the bank !!!!!!	en	imagine someone call personal phone tell take bank	Neutral	App Store	1	0	0
App Store	48833b66-fdf4-40cb-9cd7-751e3a9b6c9f	Zakaarria	6/12/23 6:43	Best banking experience				en	sa	alrajhi	I love this bank. Al Rajhi bank is the best in the country.	en	love bank al rajhi bank best country	Positive	App Store	0	0	0
App Store	eee1286f-2791-4830-86e4-b5250d87de9e	drhamdan2020	5/24/23 17:25	Excellent app				en	sa	alrajhi	Easy,fast, thanks. Excellent app	en	easyfast thank excellent app	Positive	App Store	0	0	0
App Store	b705a146-33bd-4669-a08c-4eae45b037e2	Booking app fans	5/31/23 8:17	The application hung mostly				en	sa	alrajhi	Most of the time the application hung because the last update I believe	en	time application hang last update believe	Neutral	App Store	0	1	1
App Store	75c13647-e237-46f9-8e3d-293c6ee5c6b0	FBinMadhi	3/20/23 9:41	Thank you for your appreciation!				en	sa	alrajhi	One of the best applications in the banking sector in Saudi Arabia and the Gulf ðð¼ðð¼	en	one best applications bank sector saudi arabia gulf	Positive	App Store	0	0	0
App Store	c9e08e2c-5614-455c-b3d2-833d9162ba0f	boganbilla	10/4/22 2:11	Great full				en	sa	alrajhi	The best service alrajhi bank	en	best service alrajhi bank	Positive	App Store	0	0	0
App Store	9ed72d20-0441-4523-8131-011ecaaa14db	immu142	10/2/22 19:37	Account opening				en	sa	alrajhi	This one is Worrest i ever seen Last 1 year till now iam trying to open account but didnât complete the process error	en	one worrest ever see last year till iam try open account didnt complete process error	Negative	App Store	1	1	0
App Store	652feaaf-b54d-40b5-b4f9-73f87028c589	Muzdeudd	5/14/22 7:29	Good one				en	sa	alrajhi	Very easy to use and awesome app	en	easy use awesome app	Positive	App Store	0	0	0
App Store	87e5e221-8947-490e-91ba-68e117aaa887	Abu Muhnad	5/10/22 20:53	The Bank app				en	sa	alrajhi	A good version	en	good version	Positive	App Store	0	0	0
App Store	12356a11-144f-4fab-8ba9-e8de63464476	Baz bad	5/1/22 9:30	Good update				en	sa	alrajhi	Nice easy update	en	nice easy update	Positive	App Store	0	0	0
App Store	4d43f2dd-f079-4e18-b3c3-ff62239c37bf	Raja Taimoor	4/30/22 11:36	App useful				en	sa	alrajhi	New app is quite useful	en	new app quite useful	Positive	App Store	0	0	0
App Store	6f25326a-2843-4de5-8191-3816d53f17b6	IAFaqeeh	4/29/22 21:11	Orientation				en	sa	alrajhi	Consider both vertical and horizontal orientation it does not work in tab horizontal Regards	en	consider vertical horizontal orientation work tab horizontal regard	Negative	App Store	1	0	0
App Store	5d704c53-e5ef-4510-b559-3b4c7bfd9470	nawa1221	4/28/22 19:46	A disgrace				en	sa	alrajhi	you would expect A company this rich would have a functional App I donât recall a single time where I want to use this app and it worked	en	would expect company rich would functional app dont recall single time want use app work	Positive	App Store	1	1	0
App Store	22ae6036-fdae-436a-a461-2b5bbcdc8c4d	sohail142	4/14/22 12:31	Good				en	sa	alrajhi	Excellent service Well managed Maintaining very high standards	en	excellent service well manage maintain high standards	Positive	App Store	0	0	0
App Store	e7abea27-4d85-4da2-a7e3-613b3f49893a	Nephron2000	3/24/22 8:50	An excellent experience				en	sa	alrajhi	An excellent experience with Alrajhi bank	en	excellent experience alrajhi bank	Positive	App Store	0	0	0
App Store	59e8b2f5-5776-49df-9749-9a6592ee399b	veerzah	3/4/22 17:02	Good				en	sa	alrajhi	Very helpful and easy to use ðð»	en	helpful easy use	Positive	App Store	0	0	0
App Store	374b1181-0b62-49af-81a9-f5b0d07cb77f	shaztly	3/15/22 19:54	Cannot log in after latest update				en	sa	alrajhi	After new update, Iâm not even able to log in. Earlier it was good. New update ruined it.	en	new update im even able log early good new update ruin	Negative	App Store	0	1	0
App Store	b9169ac6-eae4-4db9-8df5-9bd3e5afe68f	Nada alshikh 1985	2/28/22 13:05	Thank you				en	sa	alrajhi	Thanks so much	en	thank much	Positive	App Store	0	0	0
App Store	d27ff9c1-01dd-4992-bb48-99646b7c6d0e	FA.16	2/19/22 22:30	Good				en	sa	alrajhi	Good application easy to use	en	good application easy use	Positive	App Store	0	0	0
App Store	14820f66-835a-4e45-88ff-5f68c4b58be2	ابو حلمي	2/8/22 15:06	Great App				en	sa	alrajhi	I really enjoyed using it, simple UI,	en	really enjoy use simple ui	Positive	App Store	0	0	0
App Store	5f7ec2f8-acaf-490b-8ca8-f73ddc2f7777	Y Islam	2/7/22 9:14	Service				en	sa	alrajhi	Service is very good.	en	service good	Positive	App Store	0	0	0
App Store	a8a1095e-1655-42c1-ac0d-74e392e8242d	Moaz.Saeed	1/29/22 5:32	International remittances				en	sa	alrajhi	This is such an amazing app for international remittances with best rates and quick service.	en	amaze app international remittances best rat quick service	Positive	App Store	0	0	0
App Store	f48c031b-ec02-4148-9d12-01a561aa9b04	Pommy74	1/21/22 21:08	Excellent working				en	sa	alrajhi	Always we love with Alrajhi	en	always love alrajhi	Positive	App Store	0	0	0
App Store	0800b3b8-e968-45de-8363-b4a16dfab37e	stamp concrete	1/5/22 18:02	Transaction is very good				en	sa	alrajhi	I love this bank	en	love bank	Positive	App Store	0	0	0
App Store	0117f09e-32f9-4001-8be6-ae19e0bef82a	moaid alnasser	1/5/22 14:02	Grateful app				en	sa	alrajhi	The app it is so nice and easy to use	en	app nice easy use	Positive	App Store	0	0	0
App Store	05f894bf-8c6d-47b7-9ca4-de412ede61cd	archshetif	1/2/22 15:31	Evaluation				en	sa	alrajhi	Faster , more simple procesdures	en	fast simple procesdures	Positive	App Store	0	0	0
App Store	4b23be9f-b195-440e-90ba-8c9ed9ad5419	Brutushi	6/25/23 17:06	Great				en	sa	alrajhi	Easygoing for anyone to send and receive	en	easygoing anyone send receive	Neutral	App Store	0	0	0
App Store	0a6fa3ad-82e9-4d07-a75a-261de4e1cb86	Syed Muzammil Ahmed	8/20/22 16:23	Service				en	sa	alrajhi	Best service	en	best service	Positive	App Store	0	0	0
App Store	883575b5-87c2-4dde-80e7-6edd9a38ca95	ibtiabddak	5/11/22 19:36	I liked it				en	sa	alrajhi	The best bank app Bravo	en	best bank app bravo	Positive	App Store	0	0	0
App Store	5e83426a-3fdb-4058-8398-de2058fd2c8e	moe5510	4/29/22 20:58	The best				en	sa	alrajhi	One of the best apps i have used in US and KSA. Keep it up	en	one best apps use us ksa keep	Positive	App Store	0	0	0
App Store	9bd80a8e-7f09-46c1-959f-fb913f54d09e	Abb123y	4/28/22 8:10	Great				en	sa	alrajhi	Great App, I like the features it has.	en	great app like feature	Positive	App Store	0	0	0
App Store	34d4616e-2fa2-491d-8f5e-a838e1bc475d	seethi1	4/29/22 17:38	Seethi				en	sa	alrajhi	This app is very useful and user friendly interface	en	app useful user friendly interface	Positive	App Store	0	0	0
App Store	689e1ccf-2222-48fc-8a03-d0e988cf41ae	Altoomi2030	4/25/22 22:28	Amazing app				en	sa	alrajhi	Thanks for the new update I love it	en	thank new update love	Positive	App Store	0	0	0
App Store	c92bbdb7-0d8f-4ea2-9d05-c5336ee71371	Farhan22402	4/24/22 10:42	Farhan				en	sa	alrajhi	Exceptional Service! Excellent App with alot of featuresâ¦!	en	exceptional service excellent app alot feature	Positive	App Store	0	0	0
App Store	b3da1bdc-0d62-40e0-b221-2b85ca75a36a	F SA	4/18/22 0:28	Best bank app				en	sa	alrajhi	Best bank mobile app!	en	best bank mobile app	Positive	App Store	0	0	0
App Store	d8c0112c-afff-47cb-9c44-51d15b4c93e1	laxmi upreti	4/14/22 23:21	I love al Rajhi mobile banking . It’s very easy to use				en	sa	alrajhi	I love al Rajhi mobile banking . Itâs very easy to use	en	love al rajhi mobile bank easy use	Positive	App Store	0	0	0
App Store	49d3d1a1-bef3-43a6-8e17-50673c6835d4	ShIko🥰🥰	4/5/22 23:18	great 😊				en	sa	alrajhi	Thanks Too Much for any one work on ð¯ð¯â¤ï¸âð¥	en	thank much one work	Positive	App Store	0	0	0
App Store	aab36dc1-6cb2-417f-a630-c09b06890de9	Mowhtever	4/4/22 20:32	Best bank and best app				en	sa	alrajhi	Love the bank so much	en	love bank much	Positive	App Store	0	0	0
App Store	16542362-9e74-4655-9f0a-a6e43eb88cfa	d7ooomm0488	3/17/22 17:37	Thanks For this application				en	sa	alrajhi	Thanks full	en	thank full	Positive	App Store	0	0	0
App Store	e1095b95-cc45-4f78-8a03-b23e07dd2d82	Shakerakil	3/13/22 4:31	Best application				en	sa	alrajhi	Best application	en	best application	Positive	App Store	0	0	0
App Store	bf0d36aa-b5a0-467a-883b-3ba01a1d1108	Mohsw1983	3/1/22 6:05	Alrajhi Bank App Os one of the best				en	sa	alrajhi	Itâs very light app & I really liked it.	en	light app really like	Positive	App Store	0	0	0
App Store	cf5c7f6b-5a3e-4c56-b75a-5ca0b6236edf	alrameny	2/14/22 6:01	Many thanks alrajhi				en	sa	alrajhi	Very nice and easy to dealing with	en	nice easy deal	Positive	App Store	0	0	0
App Store	26693103-0879-485b-94a4-31d7d6f19c70	Hawk 21	1/31/22 14:08	Great app				en	sa	alrajhi	Easy and good banking experience	en	easy good bank experience	Positive	App Store	0	0	0
App Store	f8a40b49-f9af-4361-8113-acd9d51f11bd	Wazotibi	1/29/22 2:53	Alrajhi				en	sa	alrajhi	Return it to the dark mode please	en	return dark mode please	Neutral	App Store	1	0	0
App Store	74c36d8c-e740-48c7-bee8-a6498f629d90	Daraksh	1/17/22 17:37	Awesome				en	sa	alrajhi	Great feel on using the app	en	great feel use app	Positive	App Store	0	0	0
App Store	8f92794f-09d8-4cc1-96c9-25e3fb08637a	Mohammed_Ra9	1/17/22 12:14	Best Digital Banking App				en	sa	alrajhi	Look at another banks apps & then you will realize Al Rajhi is the bestðð»ð	en	look another bank apps realize al rajhi best	Positive	App Store	1	0	0
App Store	78bbf8ba-df9f-4b32-855c-54d5da4ef32e	Iyad Ali	9/4/23 7:12	Excellent				en	sa	alrajhi	Excellent and very easy to useð	en	excellent easy use	Positive	App Store	0	0	0
App Store	b5ad7b5f-a153-49e0-91dc-b9f2f9d1f253	tufa16	6/12/23 8:16	Tufa16				en	sa	alrajhi	Awesomeâ¦more power. Keep up the good work.	en	awesomemore power keep good work	Positive	App Store	0	0	0
App Store	a0cb457e-7c6b-432b-b692-ff4d6f12b070	Mazhar Gujjar	5/18/23 16:50	Very good				en	sa	alrajhi	Iâm very happy this bank	en	im happy bank	Positive	App Store	0	0	0
App Store	69544437-f5fc-4090-98a2-95e86ae7630d	Numan Sf	10/3/22 18:58	A review from the biggest fan of Alrajhi Bank.				en	sa	alrajhi	AlRajhi Bank is the best Bank in Saudi Arabia.	en	alrajhi bank best bank saudi arabia	Positive	App Store	0	0	0
App Store	983fb342-5df7-49b1-9d5a-03ac74ee76df	ziyad121	3/29/23 21:12	Last version				en	sa	alrajhi	It doesnât work after the last version.	en	doesnt work last version	Negative	App Store	0	1	0
App Store	365e7b24-b518-480c-bbd4-91601ec723bf	Adel051235677889	3/19/23 8:26	New update is a disaster				en	sa	alrajhi	New update shows me very old bills that I already paid. Please return to previous app. This step is in the wrong direction	en	new update show old bill already pay please return previous app step wrong direction	Negative	App Store	1	1	0
App Store	3083c857-0b3c-47cb-b9b8-b935166d0004	zuwaied	5/13/22 11:37	Very good app				en	sa	alrajhi	The app is very good and easy using	en	app good easy use	Positive	App Store	0	0	0
App Store	7b6824c8-50f2-4659-a29f-818f089fa0be	Dham nazzal	5/10/22 2:45	Bad , dos not open when you need it!!				en	sa	alrajhi	Allways shows an error message, though the version is up to date!!	en	allways show error message though version date	Negative	App Store	0	1	0
App Store	75305658-99cd-430b-832a-75ea83ea4618	marysavedbyGrace2021	5/7/22 17:21	Thank you				en	sa	alrajhi	Thank you God bless you in Jesus name U becoming better ð	en	thank god bless jesus name u become good	Positive	App Store	0	0	0
App Store	a402a5be-23a2-47b7-943a-ab107a086b8b	MohdMani	5/1/22 11:28	Excellent				en	sa	alrajhi	Excellent services with new identity. Fast response, and good themes	en	excellent service new identity fast response good theme	Positive	App Store	0	0	0
App Store	6edb9400-73ea-4488-80b6-5b4bd9bb274c	rishaanrafeeq	4/25/22 6:23	Excellent				en	sa	alrajhi	Great and very easy to use.	en	great easy use	Positive	App Store	0	0	0
App Store	9915c57c-5a7e-4386-a02f-11c518394181	باسل جفراوي	4/21/22 19:49	The best application for me				en	sa	alrajhi	Great job Keep it up ð	en	great job keep	Positive	App Store	0	0	0
App Store	dec913e5-133e-481b-8e5f-8379929271ed	alshdvvd	4/3/22 23:36	Thank u				en	sa	alrajhi	The best bank ever thank u for great services	en	best bank ever thank u great service	Positive	App Store	0	0	0
App Store	d41769f7-9fde-4a39-ba7f-a7d563e85af9	Anwar Alabdullah Abu Mohammed	4/1/22 8:27	Great experience Great App				en	sa	alrajhi	I enjoyed using Alrajhi App Fast Easy Secured	en	enjoy use alrajhi app fast easy secure	Positive	App Store	0	0	0
App Store	8169f376-eb7f-465c-94e7-532fc9236970	ahmedghazi85	3/31/22 6:40	Good experience				en	sa	alrajhi	Thanks for rajhi service	en	thank rajhi service	Positive	App Store	0	0	0
App Store	5f61a653-7460-4384-9a32-484d714a219b	Alaa saada	3/24/22 17:35	Amazing sostware				en	sa	alrajhi	It is a vey smart application, easy to use..	en	vey smart application easy use	Positive	App Store	0	0	0
App Store	49dfa153-4919-46a8-8af8-7c8c0f65dc98	rioerika	3/17/22 4:19	Alrahji Local bank transfer				en	sa	alrajhi	Love alrahji so much	en	love alrahji much	Positive	App Store	0	0	0
App Store	5990400d-2365-43f2-ad8f-578dc83d4d58	moatya	2/15/22 11:32	Amazing services				en	sa	alrajhi	Easier , amazing	en	easy amaze	Positive	App Store	0	0	0
App Store	ae1e3467-3418-40ec-a7c0-c0ff47cd7d06	Soso135790	2/10/22 11:10	Great app				en	sa	alrajhi	This last update is amazing with many duffrei t properties.	en	last update amaze many duffrei properties	Positive	App Store	0	1	0
App Store	e3655ddf-1530-4a69-900f-0bfd52ed7d94	Wajujon	2/9/22 3:40	Excellent bank and service				en	sa	alrajhi	Excellent ease of banking experience	en	excellent ease bank experience	Positive	App Store	0	0	0
App Store	96496b17-2602-45cd-b405-0c68e1fff5cc	umairryd	1/15/22 6:55	App isn’t working properly with iPhone 12 Pro Max				en	sa	alrajhi	Al Rajhi app in my mobile isnât working properly and Iâm unable to see any link after clicking it	en	al rajhi app mobile isnt work properly im unable see link click	Negative	App Store	0	1	0
App Store	670193b8-dcc5-487c-8f8a-4da0df2998e8	Abu Joudi1	5/22/23 16:49	Really an amazing app thanks Alrajhi bank				en	sa	alrajhi	Really an amazing app thanks Alrajhi bank	en	really amaze app thank alrajhi bank	Positive	App Store	0	0	0
App Store	5ad422a1-2b78-4822-8f97-8d826d26402c	seera rao	8/7/22 5:59	Excellent experience with the App				en	sa	alrajhi	Great ease of use	en	great ease use	Positive	App Store	0	0	0
App Store	d349199a-2a53-45b6-aee2-5b1154814e34	Riz_Sid	2/24/23 3:43	Does not work				en	sa	alrajhi	Until last update it was working nice and smooth. This update give "integration error"	en	last update work nice smooth update give integration error	Neutral	App Store	0	1	0
App Store	28d14243-3572-4584-9de7-d59d680fcabf	Haddadmj	6/19/22 8:04	Need update				en	sa	alrajhi	Canât open an account. Ask for location permission but doesnât give me popup to allow it	en	cant open account ask location permission doesnt give popup allow	Negative	App Store	0	1	0
App Store	5bd0b960-dc44-4730-a6ca-bbc6760434fe	mood9ohgkfslcn	6/8/22 7:17	Best banking app ever				en	sa	alrajhi	The product team of Alrajhi app are the best	en	product team alrajhi app best	Positive	App Store	0	0	0
App Store	9aba3b73-a99f-4a5d-abc6-68d430defd88	umkhaled000	5/18/22 20:57	Umkhaled				en	sa	alrajhi	Very well organized app ðð¼	en	well organize app	Positive	App Store	0	0	0
App Store	011f450d-8f84-4809-91d9-763994a8e5e6	Rana_Zaib	5/12/22 16:40	NICE				en	sa	alrajhi	With iphone this application work smoth ðð» deserve 5 star	en	iphone application work smoth deserve star	Positive	App Store	1	0	0
App Store	2b4b4934-b90d-4347-b00e-e6932e3d9092	@tabi	5/7/22 8:03	Good App				en	sa	alrajhi	Need update really good and user friendly.	en	need update really good user friendly	Positive	App Store	1	0	0
App Store	2b44c1b5-056f-4296-bdcf-ce6be9cda0c0	AlharbiWA	4/29/22 22:44	New update				en	sa	alrajhi	Great app! As always	en	great app always	Positive	App Store	0	0	0
App Store	94556cee-12d4-4adc-907e-d480217cb29d	Saeed Nassar	4/29/22 13:00	Finance Manager				en	sa	alrajhi	Very good and easy to use	en	good easy use	Positive	App Store	0	0	0
App Store	05b404bb-00f6-439e-a1eb-f9ca471efa02	annerie faith	4/26/22 12:32	Excellent				en	sa	alrajhi	Very convenient to use.ðð¼	en	convenient use	Positive	App Store	0	0	0
App Store	1a57f1bc-c504-4875-9051-ebe48bf849bf	Go away covid19	4/25/22 17:01	Thanks for your support				en	sa	alrajhi	Thanks for your support	en	thank support	Positive	App Store	0	0	0
App Store	eb98a3ac-1ac5-4eb3-b1c4-dcbde0abe971	abuziad99	4/24/22 8:16	Well done Rajhi				en	sa	alrajhi	Excellent application w excellent services	en	excellent application w excellent service	Positive	App Store	0	0	0
App Store	22d74150-0be8-40bd-b278-62af6dbd8b8d	Dr.mnsor	4/18/22 22:22	I like the app				en	sa	alrajhi	In my opinion, The best digital banking in Saudi	en	opinion best digital bank saudi	Positive	App Store	0	0	0
App Store	cf7a2b25-3132-49c8-9ee2-7436f381ca21	dr mada	4/5/22 20:31	Very cool app thanks				en	sa	alrajhi	I like new app very easy and cool	en	like new app easy cool	Positive	App Store	0	0	0
App Store	8f54127a-6b8a-4e08-a046-04896f9d0873	obyah	3/24/22 12:47	Rajhi nice one				en	sa	alrajhi	Itâs easy to use and enjoyable	en	easy use enjoyable	Positive	App Store	0	0	0
App Store	a4c08eed-f8bc-4e25-a32f-82ef1d9c47c1	dalia gogog	3/21/22 11:45	Great				en	sa	alrajhi	Itâs more than just great	en	great	Positive	App Store	0	0	0
App Store	2ad5ab98-d2c1-40ac-847f-ff6ec66b4d25	مرسول حيران	3/18/22 5:43	One of, if not the best bank in KSA.				en	sa	alrajhi	Very professional	en	professional	Positive	App Store	1	0	0
App Store	cb936836-3de7-42d5-87b4-570cefdb86df	msh3looh	2/17/22 21:16	Excellent				en	sa	alrajhi	The best bank application at all	en	best bank application	Positive	App Store	0	0	0
App Store	f07a2d74-b3eb-47d4-95e4-50e07bf62a02	SalimSalmani	2/15/22 9:53	International transfer				en	sa	alrajhi	Exilant service	en	exilant service	Positive	App Store	0	1	0
App Store	7f4619b7-2098-4bce-868e-68409f28ba4d	Amjad761	2/13/22 18:53	Thank you				en	sa	alrajhi	Its so so useful	en	useful	Positive	App Store	0	0	0
App Store	4f58c974-5c9e-4355-9d78-45d0b89c7878	Lover4000	2/10/22 8:11	The best bank				en	sa	alrajhi	This is one more f best bank I deal with	en	one f best bank deal	Positive	App Store	0	0	0
App Store	77e2bf52-936e-407e-9db8-eacdfe5fa8e9	Om hammad	2/6/22 11:00	Excellent app				en	sa	alrajhi	Excellent app and easy to use	en	excellent app easy use	Positive	App Store	0	0	0
App Store	8f8380c1-457c-4f0e-ae4e-8b60c8a9223f	Dhoomeeelover	2/3/22 20:16	AlRajhi new app				en	sa	alrajhi	It is amazing and professional. Thanks team.ð¥ð¥	en	amaze professional thank team	Positive	App Store	0	0	0
App Store	904f5319-5fb9-4fc2-9bb0-99a21b435440	Slomyaser	2/2/22 18:02	Good ux				en	sa	alrajhi	good User experience and very simple I like it	en	good user experience simple like	Positive	App Store	0	0	0
App Store	3fe41106-f23a-4514-bf08-ed6227f138a3	Hussain235	1/27/22 17:00	Nice app				en	sa	alrajhi	One of the best bank online app	en	one best bank online app	Positive	App Store	0	0	0
App Store	67373eb2-f68b-41cc-a979-751236112051	Han🌻	1/26/22 20:56	Very good				en	sa	alrajhi	The is now amazing the service is very good	en	amaze service good	Positive	App Store	0	0	0
App Store	97703995-4ec5-41b8-a5a4-60084d84ed71	torki_misfer	1/20/22 5:42	Greet services				en	sa	alrajhi	Easy to handle ð¤	en	easy handle	Neutral	App Store	0	0	0
App Store	f1331d10-1be9-4828-a6ee-4de05dc341e8	prinzessintota	1/5/22 16:22	Good experience				en	sa	alrajhi	Love how easy it is. Good experience	en	love easy good experience	Positive	App Store	0	0	0
App Store	9249b5fa-b6e7-4695-b49a-92c505cc8064	Moahmmed Almalki	8/22/23 6:32	Amazing app				en	sa	alrajhi	Itâs easy to use	en	easy use	Positive	App Store	0	0	0
App Store	0ca63d8c-70bc-4d94-9bdf-4a4b64417c17	psm@mohi	9/5/23 23:27	this app not working on my mobile				en	sa	alrajhi	This app automatically logout with in few secound without notification	en	app automatically logout secound without notification	Negative	App Store	0	1	0
App Store	f7faf41a-149f-4a4a-a2db-94c7a5880b25	Dawood shah	7/10/23 22:47	About app				en	sa	alrajhi	I think its number 1 banking system in saudi Aarabia !	en	think number bank system saudi aarabia	Neutral	App Store	1	0	0
App Store	42dca628-0c8e-4ab6-bb9f-62a602a3ce4d	frootme	2/21/23 11:38	Best Bank Application				en	sa	alrajhi	This is the simplest application for banking sevices overall Saudi Arabia	en	simple application bank sevices overall saudi arabia	Positive	App Store	0	0	0
App Store	7eceade6-e838-481e-ad60-34efd3c0fbab	3€b	3/20/23 10:28	New version				en	sa	alrajhi	The new update is worse than the previous one. Please go back to the old version.	en	new update bad previous one please go back old version	Negative	App Store	1	0	0
App Store	575a3791-ee9e-4422-8554-5bb86927b842	iBinJubair	9/20/22 17:50	Respect others privacy 👎				en	sa	alrajhi	There is no reason to FORCE your customer to share their location to use the app.	en	reason force customer share location use app	Negative	App Store	1	0	0
App Store	4e3b9dd3-a2ce-43a4-8a11-07b420074e6d	Indian 1971	8/9/22 4:24	Indian rupee rate very less				en	sa	alrajhi	Recent months Indian rupee rates are very bad, so big loss while sending. Why this bad rate every time with this great bank of Saudi Arabia? Can expect good rate better than four or five banks above Al Rajhi?	en	recent months indian rupee rat bad big loss send bad rate every time great bank saudi arabia expect good rate good four five bank al rajhi	Negative	App Store	1	0	0
App Store	d27c8706-d128-4f64-962a-6f97237dc0cb	MRQ240	5/12/22 5:50	Review				en	sa	alrajhi	Outstanding Services Thanks	en	outstanding service thank	Positive	App Store	0	0	0
App Store	15622acf-9030-4e94-a24d-849a6cb2d55a	mohammed - lotfy -2002	4/27/22 5:13	Transfer				en	sa	alrajhi	Best bank services in ksa	en	best bank service ksa	Positive	App Store	0	0	0
App Store	dd5c3b8b-2696-49ad-b9fa-928dece36877	tfrjuy	4/26/22 17:30	Excellent				en	sa	alrajhi	Outstanding application	en	outstanding application	Positive	App Store	0	0	0
App Store	d8aa519e-b46f-4f35-a1a5-515327adb8fd	saééd	4/25/22 14:51	Good job!				en	sa	alrajhi	Excellent service Thanks	en	excellent service thank	Positive	App Store	0	0	0
App Store	f4d4d31b-b2ce-45c2-bba1-7c2d16248a12	Nogx16	4/24/22 15:22	Very talented speaker				en	sa	alrajhi	Clear solution path and vey supportive	en	clear solution path vey supportive	Positive	App Store	1	0	0
App Store	535d3e6b-16fc-467b-bd97-3331cbcd4303	Abdulmenanh	4/23/22 16:07	Great				en	sa	alrajhi	Great and active Bank forever	en	great active bank forever	Positive	App Store	0	0	0
App Store	e2a6192a-f7d6-46a3-a748-97717477cbfb	ahmed laghari	4/17/22 19:02	Ahmed				en	sa	alrajhi	Very good and fast service	en	good fast service	Positive	App Store	0	0	0
App Store	1677c736-082c-4939-91f6-68e9bb201347	KAMI1to6	3/17/22 8:23	Great				en	sa	alrajhi	Wonderful experience	en	wonderful experience	Positive	App Store	0	0	0
App Store	3983da87-6114-4cf1-9a7a-55dad3531ab6	SULTAN ALENAZI	3/13/22 19:23	Thanks for this app				en	sa	alrajhi	I want thank you. ð·ð·	en	want thank	Positive	App Store	0	0	0
App Store	c701ecaf-132c-4b4c-93bf-3d4d69375818	و ح	3/13/22 13:48	Nice App				en	sa	alrajhi	Easy and reliable	en	easy reliable	Positive	App Store	0	0	0
App Store	7fd87374-2e7a-42af-b73a-4b564b2fdd8f	Azooozz	3/12/22 6:05	Good bank .. good service				en	sa	alrajhi	Good bank .. good service	en	good bank good service	Positive	App Store	0	0	0
[truncated: 4,371 more rows]
