# Supplementary material for: Retrieval-augmented generation analysis of user reviews in Saudi mobile banking apps: a comparative user experience study of iOS and Android
Source: PeerJ journal article supplement (doi:10.7717/peerj-cs.3565), 2026-02-06
Supplement: iOS.zip [file anb-arab-national-bank_final.xlsx]

## Sheet: Sheet 1 - anb-arab-national-ban
anb-arab-national-bank_final
source	review_id	user_name	review_date	review_title	developer_response	developer_response_date	thumbs_up	language_code	country_code	app_name	review_description	en	cleaned_reviews	Sentiment	ï»¿source	Satisfaction	Effectiveness	Efficiency
App Store	313d72c1-343a-4e77-9cdc-d17890ebb1ae	jehad alahmadi	6/25/23 15:08	يجنن التطبيق الجديد				en	ae	anb-arab-national-bank	Every day, Arabic surprises us more than the day before. ðð»ðð»ðð»	ar	every day arabic surprise us day	Positive	App Store	1	0	0
App Store	48b19e70-869a-406c-b871-3ee2f35f8764	ZubairUmar	7/12/23 5:58	Game Changer				en	in	anb-arab-national-bank	Good Application	en	good application	Positive	App Store	0	0	0
App Store	828edd47-3a69-4ea8-a147-65f5a9deb87b	GovardhanaRao	7/3/23 9:34	Amazing				en	in	anb-arab-national-bank	Great App	en	great app	Positive	App Store	0	0	0
App Store	b8340d70-9626-45d9-9e46-5ccd216c52e3	AhmedAnb	8/21/23 13:20	Advance cash problem				en	in	anb-arab-national-bank	Great	en	great	Positive	App Store	0	0	0
App Store	5870e19d-9ccf-4e75-9e9c-9447fad43c5f	suhailvpunathil	6/24/23 11:44	Feature-rich Apps				en	in	anb-arab-national-bank	Good	en	good	Positive	App Store	0	0	0
App Store	f64744a5-572c-4bba-93a2-ab3155e7f140	ضيدان العنزي	6/22/23 10:55	البنك جميل وخدماته اجمل 18638				en	kw	anb-arab-national-bank	The bank is beautiful and its services are even more beautiful. 18638	ar	bank beautiful service even beautiful	Positive	App Store	0	0	0
App Store	6b8f1e2f-50d2-47a0-88ea-5519fe21b315	mayhemkane	7/7/23 10:28	Great app				en	ph	anb-arab-national-bank	ANB	en	anb	Neutral	App Store	0	0	0
App Store	83a7b34a-8852-4d82-8759-a8e2389631c6	omaisky	7/12/23 7:15	Userfriendly with nice dashboard				en	ph	anb-arab-national-bank	Userfriendly with nice dashboard	en	userfriendly nice dashboard	Positive	App Store	1	0	0
App Store	52ad0493-cf36-430e-b033-c2ddc362c02d	Bilalnasir125	7/11/23 13:27	Best banking app				en	pk	anb-arab-national-bank	Best banking app	en	best bank app	Positive	App Store	0	0	0
App Store	aa035cbd-4892-4aa1-8a8f-c78fbbb5ada3	Soul-55	7/12/23 12:49	The Best ANB Bank Application				en	sa	anb-arab-national-bank	ðð»â¤ï¸	en		Neutral	App Store	0	0	0
App Store	ad686aa2-dbba-4f69-9aed-7e5852308e5b	Haitham al hajlah	7/9/23 8:43	Convenient, Secure, and Innovative 📲🔐🏦				en	sa	anb-arab-national-bank	Convenient, Secure, and Innovative ð²ðð¦	en	convenient secure innovative	Positive	App Store	0	0	0
App Store	158636a9-36ed-44eb-bdb0-ce49fe6129e9	™.™	7/23/23 19:35	Friendly And Efficient App				en	sa	anb-arab-national-bank	Friendly And Efficient App	en	friendly efficient app	Positive	App Store	0	0	0
App Store	73a5280f-f7b0-4d02-9780-0b190da85c0f	Omi Kolla	7/6/23 4:42	Brilliance Speed and Simplicity all at once				en	sa	anb-arab-national-bank	Brilliance Speed and Simplicity all at once	en	brilliance speed simplicity	Positive	App Store	0	0	0
App Store	69767184-f085-43eb-8666-bd9e51431069	MG-0133	7/11/23 12:37	Majestic Transformation💙.				en	sa	anb-arab-national-bank	A very wonderful application that is characterized by its ease of use	en	wonderful application characterize ease use	Positive	App Store	0	0	0
App Store	74f4bcc9-a3c1-448f-9dc8-a517694eb359	MoHd90jk	7/9/23 7:52	The best banking application among banks in the world!!				en	sa	anb-arab-national-bank	The best banking application among banks in the world!!	en	best bank application among bank world	Positive	App Store	0	0	0
App Store	6738624a-89a9-450d-8db6-c551964e6704	WaleedHHR	7/11/23 12:46	A new vision for an easy banking application				en	sa	anb-arab-national-bank	A new vision for an easy banking application	en	new vision easy bank application	Neutral	App Store	0	0	0
App Store	a8b7431d-1246-4a90-a662-348a551c2a42	Wael 147	6/27/23 14:56	Satisfying ANB Mobile Banking Services				en	sa	anb-arab-national-bank	Satisfying ANB Mobile Banking Services	en	satisfy anb mobile bank service	Positive	App Store	0	0	0
App Store	4f6c7faf-b340-432d-b641-25b4f9a6d977	Abdullah 1697	7/3/23 7:59	Amazing app				en	sa	anb-arab-national-bank	Amazing app	en	amaze app	Positive	App Store	0	0	0
App Store	f4a8d4e9-6463-4ada-bf0f-1496651f39fb	joojehd	6/26/23 14:23	Majed alhaddad				en	sa	anb-arab-national-bank	"Professional application	en	professional application	Neutral	App Store	1	0	0
App Store	8753a383-2a7d-445e-af8c-17bdeb6ea310	pukhtoon for reall	7/11/23 12:37	A new journey to the future				en	sa	anb-arab-national-bank	A new journey to the future	en	new journey future	Positive	App Store	1	0	0
App Store	a03888b9-aeee-431a-8125-15c1a7e2a66f	Saramutlaqm	6/25/23 15:29	anb customer				en	sa	anb-arab-national-bank	Shabab46730	en	shabab	Neutral	App Store	1	0	0
App Store	97b781d7-5dbd-436f-a4de-6ef39c111f34	Mohd afzal 8291	7/10/23 7:34	Digital initiative great achievement 2030				en	sa	anb-arab-national-bank	Digital initiative great achievement 2030	en	digital initiative great achievement	Positive	App Store	0	0	0
App Store	76568d2b-5f07-4910-a5ca-cafc290b2601	عبدالله ياسين	7/6/23 5:42	New experience				en	sa	anb-arab-national-bank	New experience	en	new experience	Positive	App Store	1	0	0
App Store	c35f7bf9-dbf6-4563-9f81-f49992473442	W6714	7/6/23 9:20	Nice interface				en	sa	anb-arab-national-bank	Nice interface	en	nice interface	Positive	App Store	0	0	0
App Store	08272ff5-b20b-45c1-87a1-ab9717d9633c	BlueBlack64	6/25/23 15:16	I really like the app				en	sa	anb-arab-national-bank	I really like the app	en	really like app	Positive	App Store	0	0	0
App Store	7177e32c-d1a2-41cf-9664-16047522f64e	انهو جميلون جدان	7/9/23 5:42	Fast and easy access				en	sa	anb-arab-national-bank	The user experience is beautifu	en	user experience beautifu	Positive	App Store	0	0	0
App Store	25b766cf-af3f-4d85-940a-f4dc2154a743	Kha|€D	7/3/23 10:03	I love it, easy to use				en	sa	anb-arab-national-bank	I love it, easy to use	en	love easy use	Positive	App Store	0	0	0
App Store	3e36ace1-f5bf-475e-bd13-e0b38b77d1b0	Dave197390877	7/5/23 12:53	Excellent				en	sa	anb-arab-national-bank	A.ANB	en	aanb	Neutral	App Store	1	0	0
App Store	5cc37b62-8ba1-453d-a6e1-88efaa8338e1	Khalid-m.a	7/12/23 10:39	Nice Improvements				en	sa	anb-arab-national-bank	Nice Improvements	en	nice improvements	Positive	App Store	0	0	0
App Store	3b79119c-e213-4705-be7a-23b2afd5ae87	Ahmed almashrf	7/3/23 9:39	Best app				en	sa	anb-arab-national-bank	Best app	en	best app	Positive	App Store	0	0	0
App Store	66b1b47f-06e2-434d-9875-d95597b921bd	B_9al	7/5/23 12:14	Anb application				en	sa	anb-arab-national-bank	Thank you, Arab Bank, for your services and this wonderful application. I find it much better than other banks I have tried, with its speed in the application and very high speed in requesting banking services such as personal loans, car financing, and real estate financing. It also offers speed and ease in bank transfers, and the customer service staff are very responsive in answering inquiries,…	ar	thank arab bank service wonderful application find much good bank try speed application high speed request bank service personal loan car finance real estate finance also offer speed ease bank transfer customer service staff responsive answer inquiries best possible	Positive	App Store	0	0	0
App Store	f37e2c4f-275a-46c7-a82c-86e7fbc14c2d	Walid from comms	7/5/23 11:17	Rating the new mobile app				en	sa	anb-arab-national-bank	Rating the new mobile app	en	rat new mobile app	Neutral	App Store	1	0	0
App Store	33a55992-8445-4253-9270-dd0b4247230e	Msalman984	7/3/23 14:41	State of Art				en	sa	anb-arab-national-bank	State of Art	en	state art	Positive	App Store	0	0	0
App Store	c307b1fc-e297-4d18-8fd6-ea5cb8276455	Mohammed291091	7/11/23 13:33	Fast and easy service				en	sa	anb-arab-national-bank	Fast and easy service	en	fast easy service	Positive	App Store	0	0	0
App Store	23ad4a0a-2bcf-4572-8ebe-84ac6a26144e	hatoooom911	7/18/23 13:38	Hatem alshajri				en	sa	anb-arab-national-bank	Good luck	en	good luck	Positive	App Store	0	0	0
App Store	1f4fc2fc-442f-4b1c-8918-79bff2cb5810	Rashid4844	7/5/23 11:10	Interactive App				en	sa	anb-arab-national-bank	Interactive App	en	interactive app	Neutral	App Store	1	0	0
App Store	571762bc-7417-4e22-ab73-fa99fa730eb8	krhrjdjdj	7/5/23 10:55	EASY				en	sa	anb-arab-national-bank	EASY	en	easy	Positive	App Store	0	0	0
App Store	061cf726-d183-4ece-a3c4-bb038745e34c	Majed.A.S	7/14/23 8:56	Faster, Simpler banking for everyone				en	sa	anb-arab-national-bank	The application is good and easy to use	en	application good easy use	Positive	App Store	0	0	0
App Store	2d0b8ec3-1771-439d-9147-543b74bc85fb	Dhari-H	7/11/23 12:40	Great features				en	sa	anb-arab-national-bank	Great features	en	great feature	Positive	App Store	0	0	0
App Store	94ccccc4-3fc2-4ca4-af8c-71ba8258e3db	The haterd	7/11/23 13:48	User Frindly app				en	sa	anb-arab-national-bank	User Frindly app	en	user frindly app	Neutral	App Store	1	0	0
App Store	5c3ddbc4-9423-45b9-912b-bafdd273721e	Hamad A. Alolyan	6/25/23 13:50	Great and fast & seamless application				en	sa	anb-arab-national-bank	Very good	en	good	Positive	App Store	0	0	0
App Store	37335886-7c5d-456e-a382-0008ad07f095	Fatimah albaqshi	7/11/23 12:50	The best app ever ✨				en	sa	anb-arab-national-bank	1Mansour	en	mansour	Neutral	App Store	0	0	0
App Store	0066f713-2e6c-482f-8609-82bd9c654b2a	59197	7/9/23 10:03	ANB APP				en	sa	anb-arab-national-bank	I found this app very user freindly and faster as compare to the previous one i highly recommend this app	en	find app user freindly fast compare previous one highly recommend app	Positive	App Store	0	0	0
App Store	f9390cf5-f780-40b5-b419-a26463304d13	Fdhalaan	7/9/23 6:09	anb app				en	sa	anb-arab-national-bank	Itâs easy to use and very helpful. The app has all the features I need to manage my account and my financial life.	en	easy use helpful app feature need manage account financial life	Positive	App Store	0	0	0
App Store	163624ee-fab9-4c81-88ce-2ca07eaf6eeb	أبو الجادل	7/5/23 11:01	anb mobile				en	sa	anb-arab-national-bank	Integrated banking services on your mobile	en	integrate bank service mobile	Neutral	App Store	0	1	0
App Store	08d68081-414e-4014-8915-680ee0202e05	SmS 646	7/5/23 10:55	The app is very amazing				en	sa	anb-arab-national-bank	The app is very amazing and easy to use..much better than the old one	en	app amaze easy usemuch good old one	Positive	App Store	0	0	0
App Store	629bd216-b671-4917-b89d-a83f43884d76	Ibrahimalagl	7/11/23 13:14	Great application				en	sa	anb-arab-national-bank	The new application includes more banking features, with ANB application you will reach the best customer experience ever.	en	new application include bank feature anb application reach best customer experience ever	Positive	App Store	1	0	0
App Store	08a4580a-1d1a-49d0-b71c-09760abfb4eb	gr8:1	7/10/23 7:27	New design				en	sa	anb-arab-national-bank	A new and easy design that keeps pace with the bank development	en	new easy design keep pace bank development	Neutral	App Store	0	0	0
App Store	54a64114-342c-49c1-a275-fe12773e7dba	Abdul1992$	7/5/23 11:22	Fantastic Mobile application				en	sa	anb-arab-national-bank	Fast, flexible, easy, and well designed	en	fast flexible easy well design	Positive	App Store	0	0	0
App Store	4de4428b-b536-4d00-b2a2-bdce878e5f6a	Mustafa alaradi	7/6/23 9:32	More than 5 sty				en	sa	anb-arab-national-bank	The ease of application and aesthetics design made it distinct from other applications.	en	ease application aesthetics design make distinct applications	Positive	App Store	1	0	0
App Store	7f7a4041-fbea-480a-a392-a79bfda72d2b	hussambinzaid	7/11/23 13:10	Great app				en	sa	anb-arab-national-bank	In this version, all the client's needs have been provided in terms of services, investment and financing	en	version clients need provide term service investment finance	Neutral	App Store	1	0	0
App Store	8a22611f-9d1d-4387-960d-3b5eb8851a16	Faisal alkhamis	6/25/23 14:04	Anb app				en	sa	anb-arab-national-bank	App is very amazing and easy to use .. much better than the old one	en	app amaze easy use much good old one	Positive	App Store	0	0	0
App Store	0350aebc-0d2a-4cb9-8e3d-4573eda8f2d7	Abdulaziz AlOsaimi	7/5/23 10:54	Great app				en	sa	anb-arab-national-bank	Easy access all services are available in one click Abdulaziz AlOtaibi	en	easy access service available one click abdulaziz alotaibi	Positive	App Store	0	1	0
App Store	b918715b-414c-44f3-8a05-dbc9739e489e	mashael alnfie	7/5/23 10:59	anb				en	sa	anb-arab-national-bank	There is nothing easier and clearer than this application. I really like it and it is my first bank mashael alnofei	en	nothing easy clear application really like first bank mashael alnofei	Positive	App Store	1	0	0
App Store	724bb696-b63a-400a-92c6-797c09899b59	Hafis087	7/3/23 16:07	Hafis Mohammed				en	sa	anb-arab-national-bank	Best application which I have ever used , user friendly and very useful for financial solutions and management	en	best application ever use user friendly useful financial solutions management	Positive	App Store	0	0	0
App Store	f9536799-8132-423d-9c66-556b277f836d	msmile20	6/23/23 23:42	User experience				en	sa	anb-arab-national-bank	The best mobile app in saudi banks. Many features and great user experience. 3741	en	best mobile app saudi bank many feature great user experience	Positive	App Store	0	0	0
App Store	13180c2a-6899-4a0f-8e01-e98725087da2	SSAA123123	7/11/23 13:12	ANB Digital				en	sa	anb-arab-national-bank	Great version which make it very easy to make any transactions.	en	great version make easy make transactions	Positive	App Store	0	0	0
App Store	3b790b14-b051-424d-9e37-776765daf158	OAAAle	7/5/23 11:21	Great New App!				en	sa	anb-arab-national-bank	What an incredible app to use! Itâs easy, fun and including all services needed! Thank you ANB team.	en	incredible app use easy fun include service need thank anb team	Positive	App Store	0	0	0
App Store	ca3facf8-358d-4a80-8cb8-599d6cdb6680	AR altaf	7/11/23 12:33	Easy, User friendly and Fast				en	sa	anb-arab-national-bank	Great progress!	en	great progress	Positive	App Store	0	0	0
App Store	eb03cd05-0fd2-46ec-85de-2baff8507a41	Fouad alazhry	7/5/23 12:17	ANB APP				en	sa	anb-arab-national-bank	A distinctive application easy to use and security and meet all the needs of great work	en	distinctive application easy use security meet need great work	Positive	App Store	1	0	0
App Store	2beeb1c2-29f0-425b-b6f7-71d813f41463	Abdulaziz Alahmri	7/3/23 9:43	One of the best banking apps				en	sa	anb-arab-national-bank	It is really easy and convenient to use this app for banking.	en	really easy convenient use app bank	Positive	App Store	0	0	0
App Store	676db562-6b9d-4d7a-baa3-a291a91e114f	ahmedmkz	6/25/23 20:23	Smooth and sleek experience				en	sa	anb-arab-national-bank	It is one of the best banking apps I have ever tried	en	one best bank apps ever try	Positive	App Store	0	0	0
App Store	d7c36022-79c2-4144-98ad-a844ce21d1db	A.Attallah	7/11/23 12:48	ANB Newest App				en	sa	anb-arab-national-bank	The best ANB app ever!! Everything you need for your banking needs is within this amazing app!	en	best anb app ever everything need bank need within amaze app	Positive	App Store	0	0	0
App Store	11d54e84-ec37-40ba-9ed7-1681fe4dcde7	yesmpm	7/6/23 12:34	Fine tuning required				en	sa	anb-arab-national-bank	Dark theme - the color combination could have been better Display of rewards balance is awesome Quick actions looks attractive All products are not visible as soon as logged. So the customer used to see so far is missing from the new app	en	dark theme color combination could good display reward balance awesome quick action look attractive products visible soon log customer use see far miss new app	Positive	App Store	1	0	0
App Store	ec0bc2f7-aabb-4bf2-abea-0fdb86ffb009	E Asuncion	7/12/23 10:03	Easy and secure				en	sa	anb-arab-national-bank	I used ANB app for my financial transaction and it is very easy to use and secure.	en	use anb app financial transaction easy use secure	Positive	App Store	0	0	0
App Store	6dc30f56-35d5-4848-848c-acfb9726ae98	Navafnnc	7/5/23 10:53	Fast forward banking in Ksa				en	sa	anb-arab-national-bank	All features simplified , secure and fast app	en	feature simplify secure fast app	Positive	App Store	0	0	0
App Store	533361cd-5be4-4764-a907-c7bf4872566e	Yasser Alotaibi 7031	7/5/23 9:24	The best banking app				en	sa	anb-arab-national-bank	Was good experience and easy access and practical App	en	good experience easy access practical app	Positive	App Store	0	0	0
App Store	7d6344ff-1858-4dbd-8d91-38e7b3b0b1b3	Bader. M	7/3/23 10:21	Great experience!				en	sa	anb-arab-national-bank	The app is easy to use and simple and the design is great.	en	app easy use simple design great	Positive	App Store	0	0	0
App Store	783cb161-3196-453a-92eb-01bf83974642	bdhdhdjdks	7/11/23 13:06	Abdulrahman /2533				en	sa	anb-arab-national-bank	What an amazing application nice and easy smooth Deserves the full mark.	en	amaze application nice easy smooth deserve full mark	Positive	App Store	0	0	0
App Store	8e31b99e-baf4-46ed-b3ed-ab35067b03af	Khlms	7/5/23 11:45	anb				en	sa	anb-arab-national-bank	User friendly application. Thank you anb	en	user friendly application thank anb	Positive	App Store	0	0	0
App Store	f042ed31-f7f7-4ac5-aede-1526624e4791	عادي عبود	7/3/23 10:16	Ned anb mobile				en	sa	anb-arab-national-bank	Very easy to used and fast app	en	easy use fast app	Positive	App Store	0	0	0
App Store	a3772c1b-913a-492b-b640-cca32d83f342	Abu Faisal 1007	7/3/23 9:24	Great app 👍🏻				en	sa	anb-arab-national-bank	This is what we are looking for, an easy and simple application mechanism,	en	look easy simple application mechanism	Neutral	App Store	0	0	0
App Store	b6b72e92-1bd7-4e05-8cda-6f01d871cfcb	msswk1020	7/11/23 13:27	Recommendation anb app				en	sa	anb-arab-national-bank	highly recommend the ANB bank app Secure and innovative to manage their finances.	en	highly recommend anb bank app secure innovative manage finance	Positive	App Store	0	0	0
App Store	997f765e-3438-4c78-81f1-345293322e6d	Abdullah Mohamed 11	7/4/23 6:36	Good				en	sa	anb-arab-national-bank	New design commensurate with the bankâs new vision . and easy of use.	en	new design commensurate bank new vision easy use	Positive	App Store	1	0	0
App Store	864a0adf-4b63-465c-9721-4ba1343c9854	samu8769	6/25/23 14:35	The best app bank				en	sa	anb-arab-national-bank	Easy , simple and comprehensive to use .	en	easy simple comprehensive use	Positive	App Store	0	0	0
App Store	81b812b2-97b8-4edf-bbb0-da7cf359199c	Azerer	7/5/23 11:00	Amazing app				en	sa	anb-arab-national-bank	Easy and professional application	en	easy professional application	Positive	App Store	0	0	0
App Store	a245579d-f743-4321-8eb5-241b4a9e47c9	Aljaber90	7/5/23 10:55	Thank you ANB				en	sa	anb-arab-national-bank	Perfect design and very clear. Very easy to use and clear. Great job ANB, I love it.	en	perfect design clear easy use clear great job anb love	Positive	App Store	0	0	0
App Store	9f9cd0f9-94d2-465b-a964-72bfc07911e3	عبدالله ٣٩٩٣	7/3/23 17:01	Nice app				en	sa	anb-arab-national-bank	Very good app Quick response easy to use	en	good app quick response easy use	Positive	App Store	0	0	0
App Store	75f40014-5fe1-4153-9c06-b2b347ddd44f	Yazen*2011	7/3/23 11:57	Excellent App				en	sa	anb-arab-national-bank	Thank you ANB for the new app and i like how easy it is to use.	en	thank anb new app like easy use	Positive	App Store	0	0	0
App Store	2ba3ca5c-a0c7-4b07-8385-3172ed48ad67	queen dodi 1988	6/22/23 10:58	Improvement				en	sa	anb-arab-national-bank	Great effort on the transformation, the features in the app are awesome. Tremendous improvements All the best anb	en	great effort transformation feature app awesome tremendous improvements best anb	Positive	App Store	0	0	0
App Store	cd81c4f6-f7be-446c-bcaa-65a63c4ed3f2	Omarjabbar	6/14/23 13:29	Best app in Saudi!				en	sa	anb-arab-national-bank	This has to be the best application that I encountered in the financial world, keep up the great work.	en	best application encounter financial world keep great work	Positive	App Store	0	0	0
App Store	4e449da7-8a4d-4336-85be-34e6d4cafed0	khalid hassanain	7/11/23 12:34	Good application				en	sa	anb-arab-national-bank	Excellent application and easy to use	en	excellent application easy use	Positive	App Store	0	0	0
App Store	415b5571-190d-4e58-af95-57b8d53f9a7c	Hanifa123@	7/7/23 11:41	Review				en	sa	anb-arab-national-bank	Excellent application easy to use	en	excellent application easy use	Positive	App Store	0	0	0
App Store	3d878792-870d-4893-b3c6-737bed796ed3	H.Adly	6/22/23 11:10	Customer experience				en	sa	anb-arab-national-bank	The application need more enhancement and PDF is not working for account statement, the investment portfolio need more enhancement, ext. 3284	en	application need enhancement pdf work account statement investment portfolio need enhancement ext	Negative	App Store	0	1	0
App Store	98dc42d7-942b-4d0d-90d5-19bc1f4fc7c6	Emad ON	7/11/23 12:35	Amazing				en	sa	anb-arab-national-bank	Easy and brand new looking.	en	easy brand new look	Positive	App Store	0	0	0
App Store	b3d84701-7000-4c7d-ad4a-e758b03b1a9d	emad s n	7/3/23 9:47	Amazing app				en	sa	anb-arab-national-bank	Easy and clear application	en	easy clear application	Positive	App Store	0	0	0
App Store	dc7a372a-e5c5-4de1-84b6-564233861fc8	impressive70	7/11/23 13:14	ANB mobile				en	sa	anb-arab-national-bank	Wonderful and easy use ð¹ð¹ð¹	en	wonderful easy use	Positive	App Store	0	0	0
App Store	de47118d-a238-49f8-ab4e-3244fa045d1a	amrbpc22	7/9/23 8:42	Beyond Banking				en	sa	anb-arab-national-bank	An Excellent update Your bank in your pocket	en	excellent update bank pocket	Positive	App Store	1	0	0
App Store	08e79417-1d30-444b-a647-adbd4094f705	YASIR outz	7/5/23 11:09	YASIR ARAFATH				en	sa	anb-arab-national-bank	Thank you for making banking easier and more convenientð¥ Great job ð	en	thank make bank easy convenient great job	Positive	App Store	0	0	0
App Store	53b2e70d-9f26-493f-8cdf-c91154632366	Rey 1153	7/5/23 10:06	Anb mobile				en	sa	anb-arab-national-bank	Best bank mobile app	en	best bank mobile app	Positive	App Store	0	0	0
App Store	d8fefab6-585f-4e35-9707-28bcb3e41ebc	Ibrahim-7	7/5/23 11:08	ANB				en	sa	anb-arab-national-bank	Easy, practical, fast application, one of the best applications	en	easy practical fast application one best applications	Positive	App Store	0	0	0
App Store	a29c5b9c-ef15-47b4-acf9-a604ae89445e	Aziztmimi	6/30/23 17:39	Abdulaziz				en	sa	anb-arab-national-bank	Amazing and easy to use actually	en	amaze easy use actually	Positive	App Store	0	0	0
App Store	a75dcea0-d8e7-4e1b-99f0-fee16f5da616	مجنونها fofo	7/11/23 12:46	The best banking app				en	sa	anb-arab-national-bank	Easy to use and the best in banking applications	en	easy use best bank applications	Positive	App Store	0	0	0
App Store	b0ee4d4d-d5ea-4446-91aa-6182473a60a0	Abdul 464	7/5/23 11:16	ANB				en	sa	anb-arab-national-bank	Best bank application and easy to access	en	best bank application easy access	Positive	App Store	0	0	0
App Store	89214f09-a785-43b0-ae51-072fedec99d7	Ahmed..00	7/11/23 13:01	Ahmed				en	sa	anb-arab-national-bank	Beautiful design, easy to use	en	beautiful design easy use	Positive	App Store	0	0	0
App Store	890c704c-10d9-4b3c-8641-b33a56c00bc4	jamali omer	7/5/23 13:05	SME				en	sa	anb-arab-national-bank	The new application is very simple and easy .	en	new application simple easy	Positive	App Store	0	0	0
App Store	cec52dc2-c40f-48d2-a6e2-d2af24db72f4	Farhan Ahmed1099	6/22/23 11:10	anb app is the best app				en	sa	anb-arab-national-bank	anb app is the best bank app because we can apply for personal loans , credit cards, transfer funds and make credit card payments through it.	en	anb app best bank app apply personal loan credit card transfer fund make credit card payments	Positive	App Store	0	1	0
App Store	4e9f6b44-0198-4dc4-8a5a-4c8caf0ab669	aziz 3223	7/6/23 7:22	Good App ANB				en	sa	anb-arab-national-bank	The application has become easy	en	application become easy	Positive	App Store	0	0	0
App Store	bfed5126-f08b-4e4c-8bf8-b292a82a3940	Rammbt	7/5/23 13:05	New app				en	sa	anb-arab-national-bank	The new app is very easy to use	en	new app easy use	Positive	App Store	0	0	0
App Store	30e1d530-9dc4-4179-b9ef-ded577419655	Hamad Alsagheer	7/5/23 11:45	Excellent app				en	sa	anb-arab-national-bank	Excellent app and works perfectly.	en	excellent app work perfectly	Positive	App Store	0	0	0
App Store	cd6ed501-033a-485d-9554-302f8adca121	Alyah AJ	7/18/23 12:53	👍🏻				en	sa	anb-arab-national-bank	Great application , Totally recommend.	en	great application totally recommend	Positive	App Store	0	0	0
App Store	5e4f0a99-84be-40ca-b672-2c854d1aef62	abdullah_992	7/3/23 11:28	The best app 7181				en	sa	anb-arab-national-bank	Good application & we want see moreðð	en	good application want see	Positive	App Store	1	0	0
App Store	43ee2ef3-7745-49e4-9438-5c6b95e40d25	NouAlsu	6/25/23 17:49	ANB				en	sa	anb-arab-national-bank	Outstanding user experience, features and services ðð»ðð» Ext: 7276	en	outstanding user experience feature service ext	Positive	App Store	0	0	0
App Store	a7509b27-1a8e-4333-aacd-08653d872de5	Akeko0	7/19/23 7:55	Anb				en	sa	anb-arab-national-bank	The best and easiest application in the world ANB always different	en	best easy application world anb always different	Positive	App Store	0	0	0
App Store	e0897913-0fc8-4ab5-ab0a-6ca3354cb88a	Bander 4679	7/18/23 12:56	Professional App				en	sa	anb-arab-national-bank	Itâs a perfect solution to ANBâs employee's	en	perfect solution anbs employees	Positive	App Store	0	0	0
App Store	26d61720-eaca-4c5b-83e5-6863303cad6d	eid khaled	6/25/23 14:03	Eid				en	sa	anb-arab-national-bank	The new app itâs very easy. Thank you	en	new app easy thank	Positive	App Store	0	0	0
App Store	7e18fd82-80eb-4f79-a968-a798c21d72f3	ابو عبدالرحمن٧٨	7/5/23 11:06	Outstanding				en	sa	anb-arab-national-bank	Perfect banking application	en	perfect bank application	Positive	App Store	0	0	0
App Store	656ac09b-e371-4eab-ad19-64c79b5e9adf	ifaisal_aldehani	7/3/23 9:25	Great app				en	sa	anb-arab-national-bank	The new anb app is very easy and very helpful.	en	new anb app easy helpful	Positive	App Store	0	0	0
App Store	d48c363d-0380-4880-855c-8bcf7173f742	Abdullah Elissa	7/19/23 5:08	Abdullah essa				en	sa	anb-arab-national-bank	very very excellent. And distinguished Anb easy to use	en	excellent distinguish anb easy use	Positive	App Store	0	0	0
App Store	f6d99500-1de4-4041-a184-5c23d2ee9914	Ali M 44	7/11/23 15:11	Aa				en	sa	anb-arab-national-bank	Easy anb professional application	en	easy anb professional application	Neutral	App Store	0	0	0
App Store	1eb4c0c1-008d-44f9-93c3-412115812756	nedoons	6/27/23 18:18	ANB				en	sa	anb-arab-national-bank	The design looks nice, but it don't work	en	design look nice dont work	Negative	App Store	1	0	0
App Store	34b5b2e0-a651-4f30-b065-70c21ea35df8	Waseem Mutahhar	7/3/23 9:43	The best app 😍				en	sa	anb-arab-national-bank	Very easy app Very helpful I like it	en	easy app helpful like	Positive	App Store	0	0	0
App Store	ee0e25d8-6c55-480e-95ee-47e1a550c0b5	ناهض 56790	7/5/23 11:25	Best				en	sa	anb-arab-national-bank	The best system in all Saudi bank	en	best system saudi bank	Positive	App Store	0	0	0
App Store	6a245785-f535-4365-8951-57f4c4e73839	Turki Alf	7/3/23 9:12	Tt				en	sa	anb-arab-national-bank	Excellent application and easy to handle.	en	excellent application easy handle	Positive	App Store	0	0	0
App Store	da81f83e-6892-4c1e-ac34-de6143751df9	Mo2020r	7/20/23 8:03	Mordhi				en	sa	anb-arab-national-bank	It is the most wonderful App ð	en	wonderful app	Positive	App Store	0	0	0
App Store	a58418b3-7cdf-4b93-bb4d-59c57239ccfb	Abosa3d77	7/5/23 11:41	ANB app				en	sa	anb-arab-national-bank	Thank you ANB very good and easy application	en	thank anb good easy application	Positive	App Store	0	0	0
App Store	a0c367c5-91cd-4b7f-ada4-fb18190f6c1d	Count_romeo	7/3/23 9:56	Great Application				en	sa	anb-arab-national-bank	Keep up great work anb ðªð»	en	keep great work anb	Positive	App Store	0	0	0
App Store	75fce2ca-c3fd-42b4-943f-9920f4590929	Nq1s	7/5/23 11:48	NQ				en	sa	anb-arab-national-bank	easier and helpfulðð½	en	easy helpful	Positive	App Store	0	0	0
App Store	c1bd497c-d16a-4d7c-b8ec-10a11fc8b40d	Abdullah A Alomran	7/12/23 6:35	Great app				en	sa	anb-arab-national-bank	Great app and itâs really easy to use ðð¼ðð¼	en	great app really easy use	Positive	App Store	0	0	0
App Store	f423aa5e-9db6-44a9-b05c-ec77b6e8a017	Chkgauimcx	7/5/23 11:03	g alharthi				en	sa	anb-arab-national-bank	Nice and easy to access	en	nice easy access	Positive	App Store	0	0	0
App Store	c0a0edc3-c4fd-4488-8ee7-19384b64037f	Aziz208	8/23/23 19:18	the new look				en	sa	anb-arab-national-bank	excellent new look and easy use	en	excellent new look easy use	Positive	App Store	0	0	0
App Store	5ae4efdc-3b98-4631-936a-d4d4bd1386ba	nawaf 0000	7/11/23 12:58	ANB mobile				en	sa	anb-arab-national-bank	It s d best bank app	en	best bank app	Positive	App Store	0	0	0
App Store	fe77c21e-94e5-4f7e-ae61-417fe10a5236	Moody Farooqui	6/22/23 10:56	Love it! Super fast and easy to use.				en	sa	anb-arab-national-bank	Love it! Super fast and easy to use.	en	love super fast easy use	Positive	App Store	0	0	0
App Store	01c095d1-56a4-44b1-8d1d-6cd1b9b2e0da	JoeEasy.Store	7/5/23 13:32	WOW😱				en	sa	anb-arab-national-bank	Simple & Easy to use & Perfect ðð» All the Best	en	simple easy use perfect best	Positive	App Store	0	0	0
App Store	3c3886e4-70ac-48d5-b210-f716db2b886e	imroidx10con	6/22/23 11:28	easy access for end users (4211)				en	sa	anb-arab-national-bank	easy access for end users (4211)	en	easy access end users	Positive	App Store	0	0	0
App Store	4ab21c3c-40d0-488d-88a8-432ba870760a	H-ali12	7/11/23 12:39	Anb				en	sa	anb-arab-national-bank	One of the best browsing app	en	one best browse app	Positive	App Store	0	0	0
App Store	0e294abf-54bd-4840-8f8f-73936e561678	AbdulmohsenANB	7/3/23 9:59	best App ever				en	sa	anb-arab-national-bank	nice and easy	en	nice easy	Positive	App Store	0	0	0
App Store	0a4aaa60-8fe2-47f6-84b5-9f5153ea7667	Fox lox	7/3/23 9:55	للتطور المصرفي التقني عنوان ، اسمه تطبيق anb				en	sa	anb-arab-national-bank	The technical banking development has a title, called anb application	en	technical bank development title call anb application	Neutral	App Store	1	1	0
App Store	305cba01-906a-446d-b01a-6d41e1bc178b	Wizard219	7/12/23 5:56	Abdullah				en	sa	anb-arab-national-bank	Amazing experience	en	amaze experience	Positive	App Store	0	0	0
App Store	13457aad-e9b4-4b92-ba46-7a89fcff8483	Mohamed amin abo sarah	7/6/23 13:08	Mohamed Amin ragheb				en	sa	anb-arab-national-bank	Wow itâs wonderful app itâs really great	en	wow wonderful app really great	Positive	App Store	0	0	0
App Store	0385c346-3cfb-4757-95b9-13347f1983ad	رامي محمد	6/22/23 10:51	6505				en	sa	anb-arab-national-bank	Good Mobile Application	en	good mobile application	Positive	App Store	0	0	0
App Store	b5997e18-4178-4725-b1f5-7a5db05bc4cd	Emanfalsh	7/11/23 12:50	Transformation!!				en	sa	anb-arab-national-bank	Best application ever!! With the best Bank ever!	en	best application ever best bank ever	Positive	App Store	0	0	0
App Store	b5666ef3-1293-4139-bf98-047713d0ad5c	Mustafa 55454	7/11/23 12:38	Good Serice				en	sa	anb-arab-national-bank	Great fast service	en	great fast service	Positive	App Store	0	0	0
App Store	8c0372df-b142-4c8f-a7ad-2b64a46c6d28	3bodhamad	7/3/23 9:43	Amazing app				en	sa	anb-arab-national-bank	Modern and futuristic application	en	modern futuristic application	Positive	App Store	1	0	0
App Store	7539ce76-7cec-4115-a2df-4384c35f4f59	لليابسداق	7/12/23 7:55	New				en	sa	anb-arab-national-bank	Faster ð¤ Simpler ð	en	fast simple	Positive	App Store	0	0	0
App Store	ffd14e4c-5d11-47d9-979f-5f5d094ea6c3	احمد م تركي	7/11/23 12:44	Anb mobile				en	sa	anb-arab-national-bank	It s d best banks app	en	best bank app	Positive	App Store	0	0	0
App Store	2852d22c-9b8d-445f-b3f3-bcd9147e067b	ahmed hassan hero	7/6/23 13:29	Ahmed Hassan				en	sa	anb-arab-national-bank	Great application for great bank	en	great application great bank	Positive	App Store	0	0	0
App Store	5ac1a3a7-e0b1-46a5-9635-85909445e60e	Ahmed alfawaz	6/22/23 10:59	3944				en	sa	anb-arab-national-bank	Best bank app in app store	en	best bank app app store	Positive	App Store	0	0	0
App Store	530cf401-ea2f-44f2-ae87-160d4d75814a	shajidali	7/5/23 11:48	Good				en	sa	anb-arab-national-bank	Best application and nice design	en	best application nice design	Positive	App Store	0	0	0
App Store	f6b28aa3-68cc-48ef-8d0c-ed21d539980d	A-zeer	7/3/23 11:13	Amazing				en	sa	anb-arab-national-bank	Itâs amazing application	en	amaze application	Positive	App Store	0	0	0
App Store	4f83256d-c882-4754-b52e-ca97670b0157	meshal alowais	7/13/23 10:05	Anb new app				en	sa	anb-arab-national-bank	Beyond expectations ð	en	beyond expectations	Neutral	App Store	0	0	0
App Store	40720bed-81c9-49dc-b599-77da7f01d4aa	aravoof91	6/25/23 19:42	App				en	sa	anb-arab-national-bank	Really good app	en	really good app	Positive	App Store	0	0	0
App Store	22b44fb3-48d3-4bd6-9ce9-aa2331537333	Bassil 1	7/4/23 11:55	Best App ever				en	sa	anb-arab-national-bank	Itâs a fundamental App and the best in planet.	en	fundamental app best planet	Positive	App Store	0	0	0
App Store	b697004b-d218-46fe-bfbc-4c4fa016b925	ككمكككمكمكك	7/13/23 9:01	Perfect app				en	sa	anb-arab-national-bank	Perfect app	en	perfect app	Positive	App Store	0	0	0
App Store	e4b643a3-f3e8-400a-b406-81071b58ea8a	Abdullah AlDhurgham	7/11/23 11:36	Amazing app				en	sa	anb-arab-national-bank	What an amazing app!!	en	amaze app	Positive	App Store	0	0	0
App Store	8c4f6a02-ceef-4795-9288-6545302e8073	reooome	7/4/23 6:43	Thanks				en	sa	anb-arab-national-bank	Thank u ð¹	en	thank u	Positive	App Store	0	0	0
App Store	00e83018-2ae3-45b1-96f2-0444211e88f7	GovardhanaRao	6/22/23 11:05	Very useful app				en	sa	anb-arab-national-bank	Good app. Ext 3563	en	good app ext	Positive	App Store	0	0	0
App Store	be210f23-ea6c-4a0e-b6f1-d7b4203eb033	infinte and beyond	7/5/23 12:42	Wow awesome 👏 love it. 💕				en	sa	anb-arab-national-bank	Excellent transformation and unbeatable transformation	en	excellent transformation unbeatable transformation	Positive	App Store	1	0	0
App Store	150984f4-135c-40d4-a529-307103210d39	Naiftm1	6/22/23 11:46	تطبيق ممتاز				en	sa	anb-arab-national-bank	Good application and useful 6363	en	good application useful	Positive	App Store	0	0	0
App Store	916751da-34d5-4c71-817a-e396cc4b0922	Anb6555	7/3/23 9:58	Anb app				en	sa	anb-arab-national-bank	Great job	en	great job	Positive	App Store	0	0	0
App Store	3c8023a2-6485-473d-9e4e-6e525f4b2c75	Rommel gui	6/22/23 11:16	4261				en	sa	anb-arab-national-bank	Very good app	en	good app	Positive	App Store	0	0	0
App Store	6b3654d6-8136-45b4-a235-9113b3cdae5a	Fafh1978	6/25/23 14:25	Nice innovation				en	sa	anb-arab-national-bank	Fantastic leap	en	fantastic leap	Positive	App Store	0	0	0
App Store	c14ef833-8263-41fd-90c5-3be4a18d7fbe	Rayn_89	7/11/23 13:28	App				en	sa	anb-arab-national-bank	Thanks ANB bank ð¤	en	thank anb bank	Positive	App Store	0	0	0
App Store	a8f970b3-fd5b-4ca6-8f5f-fcfe74fb2874	saad m jam	7/5/23 11:03	great apps				en	sa	anb-arab-national-bank	great apps	en	great apps	Positive	App Store	0	0	0
App Store	dc3bb613-29c4-4562-b5bf-6ffbe3b9b1d4	Ice1480	7/3/23 9:42	Anb				en	sa	anb-arab-national-bank	The app is great	en	app great	Positive	App Store	0	0	0
App Store	87a5a1e8-696d-4bff-869c-2e94d5ba5f2b	Abdulmohsen alkhaldi	7/2/23 11:31	Abdulmohsen Eid 122				en	sa	anb-arab-national-bank	Good app 122	en	good app	Positive	App Store	0	0	0
App Store	cdf31bd9-945b-4920-957b-c20e79030661	raghda_jamal	7/6/23 9:26	👍🏻				en	sa	anb-arab-national-bank	Vere good app	en	vere good app	Positive	App Store	0	0	0
App Store	3af3f861-09eb-48cc-bf85-92137afc6a96	fcahmed20	7/3/23 9:21	Alherz				en	sa	anb-arab-national-bank	Amazing	en	amaze	Positive	App Store	0	0	0
App Store	4f7c2030-de07-401a-bdaf-aea8eabddb3d	اناااااااااااا١١١٢٢١	7/11/23 12:58	Anb				en	sa	anb-arab-national-bank	Good app ð	en	good app	Positive	App Store	0	0	0
App Store	a630631d-6185-4cae-8d3b-dd9f06674d7e	Wesam 58712	7/5/23 10:55	Gooood				en	sa	anb-arab-national-bank	Gooood anb app	en	gooood anb app	Positive	App Store	0	0	0
App Store	fe081962-65d9-4dff-b106-cdf70f12182e	Mqy87	6/22/23 11:10	123				en	sa	anb-arab-national-bank	The best	en	best	Positive	App Store	0	0	0
App Store	e8ec0ee5-02e5-45cc-8264-33c884f2c634	Aziz alarbi	7/3/23 9:23	تقيم ممتاز				en	sa	anb-arab-national-bank	Aziz Alharbi	ar	aziz alharbi	Neutral	App Store	0	0	0
App Store	07cfef95-078b-499b-94e8-d7897df7a0d2	Adee1212333	6/25/23 18:04	Qw2213				en	sa	anb-arab-national-bank	Good A	en	good	Positive	App Store	0	0	0
App Store	90bbdb7d-a457-4bbc-a410-c75941b22807	OLAYAN S M M	6/22/23 11:52	ANB				en	sa	anb-arab-national-bank	2755	und		Neutral	App Store	0	0	0
App Store	24f5612a-e4c1-4ae4-b1bf-5e22967e91d6	aladen66	7/6/23 5:28	👍👍👍👍👍👍				en	sa	anb-arab-national-bank	Easy to use for both adults and children. Information protection and the ability to know if you are inside or outside the kingdom to provide you with the best service and protection. I really liked it a lot. All the services are available and it is difficult for me to find another application that meets all my requirements and more. The shape and design are amazing. To be honest, it is the best d…	ar	easy use adults children information protection ability know inside outside kingdom provide best service protection really like lot service available difficult find another application meet requirements shape design amaze honest best develop application world bank first development keep arab	Positive	App Store	1	0	0
App Store	0c2d86b1-7d8b-4ae8-aafa-c2c8c5687289	Raed M Alghamdi	7/3/23 10:09	التطبيق جداً رائع				en	sa	anb-arab-national-bank	Ease and simplicity in use, with a new, modern and advanced idea that motivates you to use it all the time. It is easier and faster. ððð»	ar	ease simplicity use new modern advance idea motivate use time easy fast	Positive	App Store	0	0	0
App Store	ae9e5393-0577-4bd2-9220-123bf21eebd2	biig love	7/29/23 16:49	Amazing				en	sa	anb-arab-national-bank	Very wonderful	ar	wonderful	Positive	App Store	0	0	0
App Store	1cc3e8b2-2aae-46f7-9924-ab38398d2a72	عايش الجهني	6/25/23 15:12	واجهة التطبيق احلى				en	sa	anb-arab-national-bank	After the update, it became easier, with more options and more beautiful.	ar	update become easy options beautiful	Positive	App Store	1	0	0
App Store	8ee3293c-01aa-4aa9-ba07-00a43d90649c	binh0maid	7/30/23 6:34	معدل				en	sa	anb-arab-national-bank	average	ar	average	Neutral	App Store	0	0	0
App Store	0f5d4bda-675e-4311-b597-f7ba1420c1a2	كادي الحمد	7/22/23 1:48	طبيق رائع				en	sa	anb-arab-national-bank	"A wonderful application with simple usage, I can easily and comfortably obtain all the information I need, and it's secure and not complicated. Thank you to those responsible for it.ð"	ar	wonderful application simple usage easily comfortably obtain information need secure complicate thank responsible	Positive	App Store	1	0	0
App Store	7ab3acfc-1ed2-47f0-9989-d1d53c427b0e	هاني ال الشيخ	7/19/23 5:33	هاني ال الشيخ				en	sa	anb-arab-national-bank	A developer beyond your imagination.	ar	developer beyond imagination	Neutral	App Store	1	0	0
App Store	6f92ddfb-58f0-4ab2-af43-fe90d475525c	Majdah 1133	7/19/23 5:17	تطبيق رائع جدا وسهل				en	sa	anb-arab-national-bank	A very wonderful and easy-to-use application.	ar	wonderful easytouse application	Positive	App Store	0	0	0
App Store	f90304ba-ce16-4eb0-90b8-b1dfdccf466a	عبدالرحمن س.ا	7/18/23 13:01	Abdulrhman saleh				en	sa	anb-arab-national-bank	A fantastic and easy-to-use application that provides flexibility in accessing banking services. The application includes all products and services, making it unnecessary to visit a branch.	ar	fantastic easytouse application provide flexibility access bank service application include products service make unnecessary visit branch	Positive	App Store	1	0	0
App Store	27f9ff00-2c78-435f-9ceb-04a6f6e95782	Samaher felmban	7/18/23 12:53	سماهر				en	sa	anb-arab-national-bank	Very beautiful application	ar	beautiful application	Positive	App Store	0	0	0
App Store	99b0c08d-acf4-4144-b632-0fdf4e4b4730	Saad 8186	7/16/23 7:18	Amazing app				en	sa	anb-arab-national-bank	The application is excellent and provides multiple services. I recommend using it as it will save you from visiting the branch.	ar	application excellent provide multiple service recommend use save visit branch	Positive	App Store	1	1	0
App Store	ac8d0dd9-14d2-49e8-a899-3cc7eb5ecd2e	maramiii92	7/15/23 17:49	بسيط سريع سهل				en	sa	anb-arab-national-bank	The application is simple, fast, and easy.	ar	application simple fast easy	Positive	App Store	0	0	0
App Store	9a40bfc6-0a33-4c9b-b444-0765d1798674	مطور واتساب	7/15/23 8:22	أفضل تطبيق بنك 🏅				en	sa	anb-arab-national-bank	The application has become the best, easiest, and most distinguished in its new form, as it combines all services seamlessly, in addition to high security. I recommend everyone to try it. ð¥	ar	application become best easy distinguish new form combine service seamlessly addition high security recommend everyone try	Positive	App Store	1	0	0
App Store	9f5c047a-a160-41a2-a5a4-e87b1a13b76b	ابوصالحanb	7/13/23 16:31	تركي				en	sa	anb-arab-national-bank	Very beautiful. May Allah increase people like you.	ar	beautiful may allah increase people like	Positive	App Store	1	0	0
App Store	151f7088-c27c-4644-a3e2-0b9196564737	A6416341a	7/13/23 11:27	الرياض				en	sa	anb-arab-national-bank	The best application in the kingdom.	ar	best application kingdom	Positive	App Store	0	0	0
App Store	a39ee0af-2544-4fc5-89da-2eb6fe1ff1cd	dnasser 5	7/13/23 9:01	الف شكر للتطبيق الرائع				en	sa	anb-arab-national-bank	Thank you very much for the amazing application. May God bless you and give you health.	ar	thank much amaze application may god bless give health	Positive	App Store	0	0	0
App Store	4a97e4cf-b0cc-4124-9ad4-d1492041b48b	بندر الرشيدي2	7/13/23 8:06	Anb				en	sa	anb-arab-national-bank	A wonderful and simple application with easy-to-use and stylish design. Keep up the good work.	ar	wonderful simple application easytouse stylish design keep good work	Positive	App Store	0	0	0
App Store	a09974b5-49bf-4847-809f-c591dd0ed0f4	الحججاج	7/13/23 7:55	اختياري المفضل				en	sa	anb-arab-national-bank	A wonderful application that is fast, smooth, accurate, secure, and easy to use. Thank you, ANB Bank.	ar	wonderful application fast smooth accurate secure easy use thank anb bank	Positive	App Store	0	0	0
App Store	4fd85c87-b5e9-4bdd-a25f-80aada222458	SHROOQ38	7/13/23 6:21	SHROOQ83				en	sa	anb-arab-national-bank	Great difference. Thank you for your efforts. I hope for constant progress and success for the Arab world.	ar	great difference thank efforts hope constant progress success arab world	Positive	App Store	1	0	0
App Store	70b1fa3c-7103-4465-918b-3c5132003276	Boood70	7/12/23 18:36	It is the best ANB banking application أفضل تطبيق مصرفي للبنك العربي الوطني				en	sa	anb-arab-national-bank	Best banking app ever ð¤©	ar	best bank app ever	Positive	App Store	0	0	0
App Store	276b9a56-e6f5-440e-81e3-d28e6e67065d	عي القلب يقنع	7/12/23 12:31	تقييم تطبيق العربي . ممتاز وسهل جداً				en	sa	anb-arab-national-bank	The application is excellent. 59117 Ali albrqi	ar	application excellent ali albrqi	Positive	App Store	0	0	0
App Store	ce820653-5599-4ce3-8ba1-dab1660de15b	Selim Hendawi	7/12/23 11:14	تصميم اكثر من رائع				en	sa	anb-arab-national-bank	The new design is awesome. 1- All transactions are now available on the main page, including accounts, cards, financing, and bill payments. 2- The Arabi Rewards feature has become easier than before. 3- The new favorites feature is excellent and allows you to customize it according to your needs. 4- The new Story feature in the application is honestly the first time I've seen it in a banking app,…	ar	new design awesome transactions available main page include account card finance bill payments arabi reward feature become easy new favorites feature excellent allow customize accord need new story feature application honestly first time ive see bank app excellent	Positive	App Store	1	1	0
App Store	ba52bd7f-c52b-4fe3-8711-efc92b015770	. 62288	7/12/23 10:17	62288				en	sa	anb-arab-national-bank	Easy to use, keeping up with the modern age, and quick application response ð¤©	ar	easy use keep modern age quick application response	Positive	App Store	0	0	0
App Store	0ec4cd64-c148-4576-8901-bcd3e58994bc	Turkyah Q	7/12/23 9:58	Turkyah AlQ				en	sa	anb-arab-national-bank	One of the best digital banking applications.	ar	one best digital bank applications	Positive	App Store	0	0	0
App Store	7d5d3d69-334c-4747-9db0-ab24cf82ab76	hanoo💫	7/12/23 9:57	Samatah				en	sa	anb-arab-national-bank	Masha Allah! You guys deserve praise for what you've achieved. You provided exceptional service to the customer and made it easy in the application. You deserve our gratitude for it. Insha Allah, may it continue to get better and better. We are thankful and appreciative for what you have done. 201	ar	masha allah guy deserve praise youve achieve provide exceptional service customer make easy application deserve gratitude insha allah may continue get good good thankful appreciative do	Positive	App Store	1	0	0
App Store	48751731-2874-49e6-b735-a7ef1a1f3538	Saeed2207	7/12/23 9:12	شكرا البنك العربي				en	sa	anb-arab-national-bank	The application is very easy and has changed positively from before. Thank you Arab Bank for the noticeable development in all services.	ar	application easy change positively thank arab bank noticeable development service	Positive	App Store	0	0	0
App Store	17a0bcd1-afd2-4e7e-8738-d994b2188fd2	Mohammed $ moe	7/12/23 9:17	تطبيق سهل الاستخدام				en	sa	anb-arab-national-bank	Thank you to Arab Bank for their development of their services, especially the application.ðð»ðð»	ar	thank arab bank development service especially application	Positive	App Store	0	0	0
App Store	84fc1f84-78be-4cdb-80a7-25e2e8e86b3c	مالك عبدالعال	7/12/23 8:58	ANB المطور				en	sa	anb-arab-national-bank	Beautiful application, I wish ANB Bank prosperity and progress. In its updated services, it is always keen to facilitate services for customer satisfaction. Thank you, ANB.	ar	beautiful application wish anb bank prosperity progress update service always keen facilitate service customer satisfaction thank anb	Positive	App Store	1	0	0
App Store	7339f5b0-aaad-4810-8a95-c3b8196e8c84	اركب على اللي لا دخل فيك كحيت	7/12/23 8:44	Great app				en	sa	anb-arab-national-bank	Very easy and advanced Ease of access to all options, greater security.	ar	easy advance ease access options great security	Positive	App Store	0	0	0
App Store	f31952de-1d1d-48e1-86a7-dfd9076fc5bd	كيس الرز	7/12/23 6:53	👍				en	sa	anb-arab-national-bank	An easy-to-use application with no complications.	ar	easytouse application complications	Neutral	App Store	1	0	0
App Store	2430ce21-2d04-4af3-b243-585c9820d4e7	خالد AQ	7/12/23 6:33	افضل تطبيق افضل بنك				en	sa	anb-arab-national-bank	Beautiful and easy.	ar	beautiful easy	Positive	App Store	0	0	0
App Store	32ca9d5d-e1e3-4b1b-9e4d-d0a925fceeb0	samiksa	7/12/23 6:12	البنك بين يديك				en	sa	anb-arab-national-bank	At our organization, excellence in design meets the provision of all needs. This is coupled with user-friendly performance that suits all ages, and a high level of safety that gives you peace of mind. So rest assured that the ANB application is within your grasp. I thank the bank for this wonderful application.	ar	organization excellence design meet provision need couple userfriendly performance suit age high level safety give peace mind rest assure anb application within grasp thank bank wonderful application	Positive	App Store	1	0	0
App Store	31650b45-4aca-40d5-a60b-86c9db9a9c3f	Boodi09	7/11/23 19:44	Abdulmajeed				en	sa	anb-arab-national-bank	A complete digital branch in your hands ð¤ Thank you for being the best bank and the best application. You have provided us with everything in one place without the need to go out or exhaust ourselves. We can accomplish everything from home âð»ð	ar	complete digital branch hand thank best bank best application provide us everything one place without need go exhaust accomplish everything home	Positive	App Store	1	0	0
App Store	724c3616-c78f-4afe-95c3-c35e29bf46be	rakan alghofaili	7/11/23 14:54	4642Amazing app				en	sa	anb-arab-national-bank	Good app Ext:4642	en	good app ext	Positive	App Store	0	0	0
App Store	fdee5d3d-cb42-425e-9d7e-91f348e5ca82	ميشو 1	7/11/23 14:10	مشاري				en	sa	anb-arab-national-bank	A very beautiful and easy application.	ar	beautiful easy application	Positive	App Store	0	0	0
App Store	b790694e-2ddc-47d0-9164-b90d6c241136	hawi hassan	7/11/23 13:59	برنامج العربي الجديد				en	sa	anb-arab-national-bank	New and advanced program from Arab National Bank. The program is smooth to use and very simple to navigate, and it has a very fast response time. Thank you, Arab National Bank.	ar	new advance program arab national bank program smooth use simple navigate fast response time thank arab national bank	Positive	App Store	0	0	0
App Store	0e94f884-93f5-426d-8aa3-647c1fc1b995	Adeldeif	7/11/23 13:55	سهل ومرن				en	sa	anb-arab-national-bank	Logging into the application is very fast.	ar	log application fast	Positive	App Store	0	0	0
App Store	688e73e9-96f2-4d67-8878-10d3cdc04045	Abod-hdf	7/11/23 13:49	دائما الافضل في الخدمات الالكترونيه				en	sa	anb-arab-national-bank	Always the best in electronic services.	ar	always best electronic service	Positive	App Store	0	0	0
App Store	a9c208ec-3933-491f-8614-2bdd2f1b1aca	Alyami hussain	7/11/23 13:30	تطبيق رائع				en	sa	anb-arab-national-bank	"A wonderful application that keeps up with the noticeable development of the Arab Bank in all fields, and also aligns with the Kingdom's 2023 vision."	ar	wonderful application keep noticeable development arab bank field also align kingdoms vision	Positive	App Store	1	0	0
App Store	c52fb566-b70e-4d5d-8727-71b6e06cc768	alshalan1	7/11/23 13:05	تطبيق جميل				en	sa	anb-arab-national-bank	Beautiful application	ar	beautiful application	Positive	App Store	0	0	0
App Store	bc87a374-7542-4493-8b1e-609cdec12811	nemer aladwany	7/11/23 13:04	تطور وابداع				en	sa	anb-arab-national-bank	The application has become easier and has a fantastic design, honestly, it's a masterpiece.	ar	application become easy fantastic design honestly masterpiece	Positive	App Store	0	0	0
App Store	3961f364-429d-4c6c-999e-794e4a7dfb72	عبدالله الشاجري	7/11/23 13:04	تطبيق Anb				en	sa	anb-arab-national-bank	A very beautiful and easy-to-use application that outperforms other bank applications by 95%. Thank you to the National Arab Bank family for their creativity and facilitating customer service.	ar	beautiful easytouse application outperform bank applications thank national arab bank family creativity facilitate customer service	Positive	App Store	1	0	0
App Store	263dfa6b-6d4e-46f8-8b0a-67bd77f2eadd	ابو فيصل الزامل	7/11/23 13:01	Anb				en	sa	anb-arab-national-bank	The best Arabic always.	ar	best arabic always	Positive	App Store	0	0	0
App Store	e335e9d1-c432-4cfd-8437-c1345a3439c2	abdulaziz474	7/11/23 12:57	Good				en	sa	anb-arab-national-bank	A very wonderful application that provides all banking services.	ar	wonderful application provide bank service	Positive	App Store	0	0	0
App Store	939493e2-6da9-4322-b2a1-df7be68557f2	عابر سبيل 🇸🇦	7/11/23 12:55	بنكي العزيز				en	sa	anb-arab-national-bank	Masha Allah, it is very wonderful, comprehensive, and beautiful. I wish my dear bank more progress and success. ðð	ar	masha allah wonderful comprehensive beautiful wish dear bank progress success	Positive	App Store	0	0	0
App Store	87289a58-8d86-4ae5-93f1-90cea19e2f2d	330100*	7/11/23 12:51	علي العساكر				en	sa	anb-arab-national-bank	One of the best banking applications, with a design and appearance that is more than wonderful. It provides easy access to all services through the application, with very few malfunctions. This is what distinguishes the Arabi application.	ar	one best bank applications design appearance wonderful provide easy access service application malfunction distinguish arabi application	Positive	App Store	1	1	0
App Store	0e0644aa-8556-4fbc-b419-e676431ab9f8	Naif Raddah	7/11/23 12:50	تطبيق جميل				en	sa	anb-arab-national-bank	One of the best banking applications, easy and lightweight, and it can't get any better.	ar	one best bank applications easy lightweight cant get good	Positive	App Store	1	1	0
App Store	4dd458b1-e4fa-4b64-9729-ac7eb33f7e63	Mutaz alhammam	7/11/23 12:50	Mutaz58687				en	sa	anb-arab-national-bank	Excellent and easy to use.	ar	excellent easy use	Positive	App Store	0	0	0
App Store	2c167a8e-5cc1-42e3-9f8a-767ae14b8854	goodasaaf	7/11/23 12:49	تقنية وامان مع البنك العربي الوطني				en	sa	anb-arab-national-bank	We enjoy high technology and security with the Arab National Bank application. Ease and smoothness in usage, I recommend everyone to use the Arab National Bank. âï¸âï¸âï¸	ar	enjoy high technology security arab national bank application ease smoothness usage recommend everyone use arab national bank	Positive	App Store	0	0	0
App Store	5bc182a8-1cdf-421f-ba01-1c03c7434dd2	Raeed_Khashoggi	7/11/23 12:49	ممتاز، تبقى له بعض التفاصيل البسيطة				en	sa	anb-arab-national-bank	Through this new application, Arab Bank has added new features that were not available, such as: - Improved browsing experience for the application and account operations - Displaying card information - Quick action options - Prominent display of bank advertisements - The ability to control card details and change purchase limit through point of sale and internet - The ability to control connecte…	ar	new application arab bank add new feature available improve browse experience application account operations display card information quick action options prominent display bank advertisements ability control card detail change purchase limit point sale internet ability control connect devices online service still minor detail consider need barcode account statements necessity activate pdf docume…	Neutral	App Store	1	1	0
App Store	d379be53-77a4-4fcc-9a7b-35247b96de68	لاانصح بالتعامل معاهم	7/11/23 12:49	سهولة التعامل حيث تجد تطبيق العربي				en	sa	anb-arab-national-bank	Continuous commitment to providing banking services.	ar	continuous commitment provide bank service	Positive	App Store	0	0	0
App Store	6da59579-70ef-424f-8e27-ad2fbc6821bf	Faisal Kamal22	7/11/23 12:48	تطور				en	sa	anb-arab-national-bank	Digital development has become a characteristic feature of Arab National Bank.	ar	digital development become characteristic feature arab national bank	Neutral	App Store	1	0	0
App Store	86f52f7a-6fe6-4de4-940d-51e88c464f73	ungry cusmer	7/11/23 12:45	تطبيق العربي الجديد				en	sa	anb-arab-national-bank	The application is excellent and very easy.	ar	application excellent easy	Positive	App Store	0	0	0
App Store	00ac4d9a-8b13-4ab8-bc16-a6f27fe3968e	ريان ٢٠١٩	7/11/23 12:45	تطبيق العربي				en	sa	anb-arab-national-bank	Together for change and striving towards the top.	ar	together change strive towards top	Positive	App Store	1	0	0
App Store	c1a980fd-4e91-47ce-a17a-09e014017a86	نجيب حميد	7/11/23 12:45	Anb تفوز الرقم الاول				en	sa	anb-arab-national-bank	A wonderful, beautiful, and easy-to-use application.	ar	wonderful beautiful easytouse application	Positive	App Store	0	0	0
App Store	3c57a1ef-6913-408b-b367-fd123f59f356	Nada Nassir	7/11/23 12:45	يزيد الجارالله				en	sa	anb-arab-national-bank	The application is very easy, especially when it comes to exchanging points and rewards.	ar	application easy especially come exchange point reward	Positive	App Store	0	0	0
App Store	cb8010a6-98c3-4b1d-9d55-f64e03629790	Waleed 1991	7/11/23 12:45	برافو				en	sa	anb-arab-national-bank	An amazing application.	ar	amaze application	Positive	App Store	0	0	0
App Store	d59eb11a-0c51-4083-bb2a-e9a28374164a	asams1978	7/11/23 12:42	ابداع				en	sa	anb-arab-national-bank	The application interface is beautiful. The application is noticeably faster than before. Ease of access to services.	ar	application interface beautiful application noticeably fast ease access service	Positive	App Store	0	0	0
App Store	44750617-6f6f-4f95-a064-6a1108e63167	moneer22	7/11/23 12:41	تطبيق anb				en	sa	anb-arab-national-bank	The application is very excellent and easy for the customer. There are many things that the customer needs, they will find them in the application.	ar	application excellent easy customer many things customer need find application	Positive	App Store	0	0	0
App Store	fd9632f2-afb0-43f5-84ce-6c4df7a33fc0	Alsabi 550	7/11/23 12:39	Beautiful bank				en	sa	anb-arab-national-bank	Best bank ever ð¤©	en	best bank ever	Positive	App Store	0	0	0
App Store	7d106547-e0fc-434b-8801-c98dafdb6a98	Hussain jarrash	7/11/23 12:37	افضل تطبيق في بنوك المملكة				en	sa	anb-arab-national-bank	The Arab Bank application is one of the best banking applications in the Kingdom. It is also a very secure application against fraud. I would like to thank the bank's management for their efforts in developing this application that meets all customer needs. Hussein Al-Jarash 62259 Extension number 6922	ar	arab bank application one best bank applications kingdom also secure application fraud would like thank bank management efforts develop application meet customer need hussein aljarash extension number	Positive	App Store	1	0	0
App Store	0a30949c-3993-4a65-b3de-af5363063a69	تركي ابو خلف	7/11/23 12:37	تطبيق البنك العربي				en	sa	anb-arab-national-bank	The application is excellent and easy.	ar	application excellent easy	Positive	App Store	0	0	0
App Store	ab2afd32-77e5-484e-ba36-fa0597a2b4c3	احمد @ ابوخالد	7/11/23 12:36	احمد العنزي٥٨٥١٢				en	sa	anb-arab-national-bank	Amazing application	ar	amaze application	Positive	App Store	0	0	0
App Store	ac24dd74-c0ad-46c8-8b90-c9d75cb6dcd4	أفضل تطبيق جربته	7/11/23 12:35	Ahmed Alanazy				en	sa	anb-arab-national-bank	An easy-to-use application that meets all my needs.	ar	easytouse application meet need	Positive	App Store	0	0	0
App Store	d441a89f-eb8f-4b5c-a421-d22b528779a0	رشيد الغامدي	7/11/23 12:35	ANB				en	sa	anb-arab-national-bank	The application interface is beautiful and the application is very easy and flexible.	ar	application interface beautiful application easy flexible	Positive	App Store	1	0	0
App Store	3e90dbbb-adda-4d4c-bb48-ed2aa54d76dd	Hamad.AlTowijry	7/11/23 12:35	ANB New App				en	sa	anb-arab-national-bank	Very beautiful interface and easy to use ðð» The new application is really great.	ar	beautiful interface easy use new application really great	Positive	App Store	0	0	0
App Store	640ce78a-7f81-4875-9b24-5c82a06af4d2	ebtesam alluhaibi	7/11/23 12:34	تطبيق البنك العربي				en	sa	anb-arab-national-bank	I have several accounts in Saudi banks, but the Arab Bank application surpasses all other applications in terms of ease and convenience of use.	ar	several account saudi bank arab bank application surpass applications term ease convenience use	Positive	App Store	1	0	0
App Store	3715df9e-8eb4-4dc0-af59-4895109d152d	Mn bb	7/11/23 12:33	تطبيق رائع				en	sa	anb-arab-national-bank	Beautiful and modern application, I didn't need any other bank and I haven't visited the branch at all since I opened my account in 2019.	ar	beautiful modern application didnt need bank havent visit branch since open account	Positive	App Store	1	0	0
App Store	e3b27151-47cf-4cfb-b6de-582899015621	Odai 2020	7/11/23 12:32	Anb				en	sa	anb-arab-national-bank	The application is sweet, distinctive, easy, and comprehensive, offering all services with ease.	ar	application sweet distinctive easy comprehensive offer service ease	Positive	App Store	0	0	0
App Store	afc859a6-7252-4ce6-af4f-52ee3238be01	qns1666	7/11/23 12:31	تقييم التطبيق 10-10				en	sa	anb-arab-national-bank	"An excellent and outstanding application."	ar	excellent outstanding application	Positive	App Store	0	0	0
App Store	c4f76b67-dd11-4939-89f6-652d5320f6db	Ibrahim.•	7/11/23 12:17	anb				en	sa	anb-arab-national-bank	A very wonderful and easy to use application that provides all services.	ar	wonderful easy use application provide service	Positive	App Store	0	0	0
App Store	cd9133ed-2472-4c5f-abf3-0455bd8a4d14	Mohamed..2030	7/11/23 11:06	التطبيق				en	sa	anb-arab-national-bank	The application is fast and very beautiful. 56775	ar	application fast beautiful	Positive	App Store	0	0	0
App Store	37e57abe-e17e-44f2-a055-e810c88733ba	ALYami20202	7/10/23 21:51	محمد				en	sa	anb-arab-national-bank	"An excellent and well-coordinated application that deserves praise. We wish you continued success and creativity."	ar	excellent wellcoordinated application deserve praise wish continue success creativity	Positive	App Store	1	0	0
App Store	5e174b70-0b20-4a26-8525-a093b9cea071	ALI MAHNSHI	7/10/23 21:35	التطبيق المطور				en	sa	anb-arab-national-bank	I congratulate you on the ease and smoothness of the application ð¤ð»	ar	congratulate ease smoothness application	Positive	App Store	0	0	0
App Store	2f84d384-a1f3-4240-a02a-64d37b62bf0a	Maryam 135	7/9/23 6:42	كامل الخدمات البنكيه بتطبيق واحد				en	sa	anb-arab-national-bank	A beautiful and very user-friendly application, there is no need to visit the branch, all the services are available in one program with easy-to-use steps.	ar	beautiful userfriendly application need visit branch service available one program easytouse step	Positive	App Store	1	0	0
App Store	9151cd70-b121-4fa1-bdc2-fb1a29fd040f	Ahmed8118	7/9/23 6:36	برنامج جميل				en	sa	anb-arab-national-bank	I have been using the ANB mobile app for a few months now and I am really impressed with how easy it is to use. The app has all the features I need to manage my financials on the go, including checking my account balances, transferring money, and paying bills.	ar	use anb mobile app months really impress easy use app feature need manage financials go include check account balance transfer money pay bill	Positive	App Store	0	1	0
App Store	96b4be98-a0b9-4b24-ab6a-b0319bdcb33d	mohd5513333	7/9/23 6:26	تطبيق ممتاز				en	sa	anb-arab-national-bank	The application is excellent and is considered one of the easiest applications I have tried.	ar	application excellent consider one easy applications try	Positive	App Store	0	0	0
App Store	afa45d17-da46-4808-8047-51d32d5b5f2c	Mo.shalan	7/7/23 13:53	تجربه رائعه				en	sa	anb-arab-national-bank	Wonderful and updated experience, easy and fast with all the features. Thank you.	ar	wonderful update experience easy fast feature thank	Positive	App Store	0	0	0
App Store	fbd6d134-159a-423e-8881-b04b5609842c	Danyah sh	7/6/23 19:42	Danyah				en	sa	anb-arab-national-bank	Very easy Great services	ar	easy great service	Positive	App Store	0	0	0
App Store	9a169a0a-3160-48ad-92bb-8026d4ff6f62	Alhosseini	7/6/23 11:08	Saad ALHARTHI				en	sa	anb-arab-national-bank	A very good and easy to use application.	ar	good easy use application	Positive	App Store	0	0	0
App Store	ac4b6cc3-91e8-40c0-a7b0-f61f61a56499	علاء محمد الحربي	7/6/23 10:24	☺️				en	sa	anb-arab-national-bank	The new application is legendary myth â¥ï¸ð¤.	ar	new application legendary myth	Positive	App Store	1	0	0
App Store	c5862de5-1395-4846-9d0f-6efb331b982f	brhom008	7/6/23 9:35	التطبيق اكثر من رائع 👏👍				en	sa	anb-arab-national-bank	The application is more than excellent ðð	ar	application excellent	Positive	App Store	0	0	0
App Store	1636bd34-d8f1-4dab-8507-e93761a2e74b	عبدالله العنزي 60931	7/6/23 8:12	تطبيق العربي				en	sa	anb-arab-national-bank	The application is wonderful and exclusive, and it saves a lot of time and effort. It is one of the best applications.	ar	application wonderful exclusive save lot time effort one best applications	Positive	App Store	0	0	0
App Store	dd344817-ba2e-4706-be4b-d8d199b31756	عبدالعزيز العتيبي@	7/6/23 8:08	تطبيق سهل وممتاز 60676				en	sa	anb-arab-national-bank	Thank you National Arab Bank for this successful application.	ar	thank national arab bank successful application	Positive	App Store	0	0	0
App Store	3964307f-2a62-4eb4-bd35-cfc92b36b39e	بدر العيبان	7/6/23 7:53	AWAD ALMutairi				en	sa	anb-arab-national-bank	AWAD ALMutairi Special and developed application. Thank you, Anb.	ar	awad almutairi special develop application thank anb	Positive	App Store	0	0	0
App Store	ec4e4cc4-4dda-4248-9171-519654e00749	يوسف 60101	7/6/23 7:52	60101				en	sa	anb-arab-national-bank	Thank you for the ease of the application.	ar	thank ease application	Positive	App Store	0	0	0
App Store	b1546bbb-6b3f-455c-9869-23e1579b0092	حسن بووحيد	7/6/23 7:44	57826				en	sa	anb-arab-national-bank	Thank you for the excellent applications from a distinguished bank.	ar	thank excellent applications distinguish bank	Positive	App Store	0	0	0
App Store	9b38b824-33b9-4882-ab42-c8eda4356415	Mahmoud abdeljawwad	7/6/23 6:50	ممتاز جدا				en	sa	anb-arab-national-bank	The application now keeps up with the development that Arab National Bank aspires to.	ar	application keep development arab national bank aspire	Neutral	App Store	1	0	0
App Store	05578f86-6d75-4dfa-9657-399b61b12cac	F_16a	7/6/23 6:21	ممتاز				en	sa	anb-arab-national-bank	Excellent application and many errors have been fixed in the previous version of the application. Thank you for your efforts.	ar	excellent application many errors fix previous version application thank efforts	Positive	App Store	0	1	0
App Store	cecdd121-1cb0-4d4a-aeea-598d55a33d8a	آيفون ١٦	7/6/23 6:21	تطبيق بنكي ممتاز ومتطور				en	sa	anb-arab-national-bank	A new and distinctive interface that includes all services, easy and fast, with high security features.	ar	new distinctive interface include service easy fast high security feature	Positive	App Store	0	0	0
App Store	76bcb743-a246-4d34-ae65-8e0b92eca4ae	KAA211144	7/6/23 6:20	سهل و ممتع				en	sa	anb-arab-national-bank	One of the best banking applications, easy access to service that meets all needs without the need to visit the branch, excellent ð	ar	one best bank applications easy access service meet need without need visit branch excellent	Positive	App Store	0	0	0
App Store	5bfd0c80-c3c7-4832-a559-ff1fe0cfc1f2	Faisal AlJ000	7/6/23 6:15	تطبيق رائع				en	sa	anb-arab-national-bank	The best banking application that is easy to use, has a beautiful and comfortable design, and is professional. Thank you, ANB.	ar	best bank application easy use beautiful comfortable design professional thank anb	Positive	App Store	0	0	0
App Store	f63ce012-3353-4cdc-bfdd-1c6c2b45ff3a	Ahm606ad	7/6/23 5:57	تطبيق العربي الجديد				en	sa	anb-arab-national-bank	Very excellent application and easy to use.	ar	excellent application easy use	Positive	App Store	0	0	0
App Store	f245851d-f29b-43e3-9242-16746bf3e39c	فهد العساف	7/6/23 3:18	Amazing app				en	sa	anb-arab-national-bank	Easy and convenient application	ar	easy convenient application	Positive	App Store	0	0	0
App Store	b6a60760-ee6d-436a-ae82-9610503e1c43	محمد ابومهنا	7/5/23 21:13	تطبيق ANB				en	sa	anb-arab-national-bank	Excellent, easy to use and fast, with a wonderful new design. It includes all the required services. High security. We thank all those in charge of it.	ar	excellent easy use fast wonderful new design include require service high security thank charge	Positive	App Store	1	0	0
App Store	694f1353-75ba-4b3d-a528-be0add690460	Ali Alqahtani 1063	7/5/23 19:17	ali				en	sa	anb-arab-national-bank	The new application is excellent and easy to use. Thank you to those responsible for it.	ar	new application excellent easy use thank responsible	Positive	App Store	0	0	0
App Store	d0a47e22-5902-4010-8729-8c6cf5b83150	Turki 10	7/5/23 18:03	تطبيق سهل ومميز يخدم كافة التعاملات البنكية ويناسب جميع الأعمار				en	sa	anb-arab-national-bank	An easy and distinctive application that serves all banking transactions and is suitable for all ages	id	easy distinctive application serve bank transactions suitable age	Positive	App Store	1	0	0
App Store	036dcf0d-f717-4171-9066-c2004fafd9bf	almnsel	7/5/23 15:56	ممتاز				en	sa	anb-arab-national-bank	Beautiful update, easy access to all services. ð«¶ð» 803149	ar	beautiful update easy access service	Positive	App Store	0	0	0
App Store	1b452702-ac9c-4c2d-aa1b-f241c62c1203	waleedwa	7/5/23 15:29	تطبيق أكثر مرونة وأسهل بكثير عن السابق				en	sa	anb-arab-national-bank	Flexible and easier application. Keep going and good luck, we are all supporters of you ð¹ Extension number 63810 Waleed Al-Bishi	ar	flexible easy application keep go good luck supporters extension number waleed albishi	Positive	App Store	0	0	0
App Store	714cf167-5590-4b8a-afaa-1a590ed658a1	Fo0ody266	7/5/23 14:41	Great application				en	sa	anb-arab-national-bank	A beautiful and easy-to-use application that provides all banking services and operations, with a fantastic design. ð	ar	beautiful easytouse application provide bank service operations fantastic design	Positive	App Store	0	0	0
App Store	b615d233-c172-4926-9055-47fe3ec361c6	Bader 2088	7/5/23 14:12	تطبيق متطور وسهل الاستخدام				en	sa	anb-arab-national-bank	Advanced and user-friendly application.	ar	advance userfriendly application	Positive	App Store	1	0	0
App Store	9e002717-91e4-4167-995a-0d8563c75dea	سعد الفريدان	7/5/23 13:27	تطبيق رائع				en	sa	anb-arab-national-bank	One of the best banking apps without a doubt.. Easy to use.. Fast in executing services.. Very clear and noticeable development.. Keep up the good work. ð«¶ð»ð	ar	one best bank apps without doubt easy use fast execute service clear noticeable development keep good work	Positive	App Store	0	0	0
App Store	6e5ecd2a-c2aa-49db-b38e-6c0292559e96	Marzooq1	7/5/23 13:27	تطبيق رائع جداً				en	sa	anb-arab-national-bank	Beautiful and easy-to-use features in the application, I recommend downloading it.ðð	ar	beautiful easytouse feature application recommend download	Positive	App Store	0	0	0
App Store	d76aa3e6-23d0-429f-a3c0-dc32f3967610	Raed154	7/5/23 13:18	Raed175				en	sa	anb-arab-national-bank	Excellent, thank you ðð½ ðð½ðð½ðð½ðð½ðð½	ar	excellent thank	Positive	App Store	0	0	0
App Store	709129dc-7525-4097-ae92-e7d867278da6	Sami2030+	7/5/23 13:10	Anb				en	sa	anb-arab-national-bank	Arabic is easier in Arabic. A distinctive and competitive application for all banks. My motto is Arabic and there is no comparison with others. Participating Branch: Bulgharashi 226. Job number 62150.	ar	arabic easy arabic distinctive competitive application bank motto arabic comparison others participate branch bulgharashi job number	Positive	App Store	1	0	0
App Store	bc9f8a7e-0b4e-4bd2-9a46-d65256273efc	Abud313	7/5/23 13:08	تطبيق البنك العربي				en	sa	anb-arab-national-bank	Ease of login, speedy execution of operations, and inclusion of all services in the application. Thank you.	ar	ease login speedy execution operations inclusion service application thank	Positive	App Store	0	1	0
App Store	134e2861-e343-4fa4-af70-3dc2ce6d177f	Ahmed Almushari	7/5/23 12:54	أحمد ال مشاري				en	sa	anb-arab-national-bank	One of the best applications among Saudi banks, easy to use and provides all the services that serve customers with ease and speed. Thank you, Arab Bank, for this beautiful application.ðð¼	ar	one best applications among saudi bank easy use provide service serve customers ease speed thank arab bank beautiful application	Positive	App Store	0	0	0
App Store	f5aa3843-6cbb-407c-a051-dc729d34ca5a	Budoor Aldossary	7/5/23 12:43	B				en	sa	anb-arab-national-bank	The best application is ANB, very amazing.	ar	best application anb amaze	Positive	App Store	0	0	0
App Store	43062410-db06-4960-9a8e-1fefe6fd6d08	eme600	7/5/23 12:42	ممتاز				en	sa	anb-arab-national-bank	Easy and fast application ðð»	ar	easy fast application	Positive	App Store	0	0	0
App Store	ab29be7d-7e70-43cb-a048-fdabc59c2e6b	Mohammad 1993	7/5/23 12:32	Anb _ Mohammed				en	sa	anb-arab-national-bank	When skilled hands and refined minds come together, this beauty is created. Special thanks to all those who conceived, planned, and implemented this excellence in the Arab Bank through this application.	ar	skilled hand refine mind come together beauty create special thank conceive plan implement excellence arab bank application	Positive	App Store	0	0	0
App Store	f88077b3-3cbc-40d0-9500-4a42d0077998	اسأل الله حسن الخاتمة	7/5/23 12:18	تطبيق العربي				en	sa	anb-arab-national-bank	The application is knowledgeable about all the services that exceed other banks.	ar	application knowledgeable service exceed bank	Positive	App Store	1	0	0
App Store	cdfd08e2-3143-41b4-8eda-30307c622ad6	Mohamad alshahrani	7/5/23 12:09	تطبيق مرن جدا وسهل الاستخدام				en	sa	anb-arab-national-bank	A very flexible and easy-to-use application.	ar	flexible easytouse application	Positive	App Store	0	0	0
App Store	eeb7f259-0d2d-4cfb-ba68-c8db9a941fa8	Meedo4163537	7/5/23 12:09	ممتاز				en	sa	anb-arab-national-bank	Excellent, honestly, and much better than the competing apps.	ar	excellent honestly much good compete apps	Positive	App Store	0	0	0
App Store	15788794-9388-4ced-8826-d5510be623aa	Fawaz alnofai	7/5/23 12:03	تطبيق جميل جداً .. وبالتوفيق				en	sa	anb-arab-national-bank	Extension: *300 6541 56918	ar	extension	Neutral	App Store	0	1	0
App Store	2930146f-b104-4630-9752-9c2df52080fd	AYMAN JEDDAH	7/5/23 11:57	ممتاز 288222*				en	sa	anb-arab-national-bank	"A distinctive application that keeps pace with the constant progress of our beloved bank."	ar	distinctive application keep pace constant progress beloved bank	Positive	App Store	1	0	0
App Store	8987fd04-4d04-42f7-b775-7101ab599331	Abduleeeelah	7/5/23 11:55	تطبيق يتناسب مع الهويه الجديده للبنك				en	sa	anb-arab-national-bank	Honestly, the application is very, very easy and organized. Now, it is possible to control the appearance (light or dark). On the home page, there is a summary of all your account balances, and it is possible to hide the balance professionally and neatly. Also, it is possible to easily view the number of reward points and the balance of the credit card. Additionally, you can easily print digital …	ar	honestly application easy organize possible control appearance light dark home page summary account balance possible hide balance professionally neatly also possible easily view number reward point balance credit card additionally easily print digital document without need go branch excel geniuses	Positive	App Store	1	0	0
App Store	d4860263-5b38-48fa-9ebb-144155c6cdbc	Ahmed Morly	7/5/23 11:53	جميل وسهل ومرن 👌				en	sa	anb-arab-national-bank	Fast access, increased security, greater control, easy registration. # Arabic application.	ar	fast access increase security great control easy registration arabic application	Positive	App Store	0	0	0
App Store	18bc0481-a3f6-4805-b194-0fb242a936ae	محمد حمد ال شيبان	7/5/23 11:50	السهل المبسط				en	sa	anb-arab-national-bank	One of the easiest applications and flexible to use ð	ar	one easy applications flexible use	Positive	App Store	0	0	0
App Store	d3f315ba-9320-4ae2-897c-08ef36f2d934	علي غواء	7/5/23 11:47	اقوئ برنامج امان وسهوله انصح الجميع بالتعامل معه				en	sa	anb-arab-national-bank	The strongest security program and easy to use, I recommend everyone to deal with it.	ar	strong security program easy use recommend everyone deal	Positive	App Store	0	0	0
App Store	f3fc1562-fe05-4986-8cf9-ccb5beafb88a	Bandar 53243	7/5/23 11:40	تطبيق بطل				en	sa	anb-arab-national-bank	After using the application, I noticed flexibility and ease of accessing all services.	ar	use application notice flexibility ease access service	Positive	App Store	1	0	0
App Store	d8086767-c05f-4378-87d1-f6de5e35e6d0	Zojyat	7/5/23 11:38	تطبيق في غايه الروعه				en	sa	anb-arab-national-bank	An excellent application and exceptional progress in making banking in Egypt easier and faster.	ar	excellent application exceptional progress make bank egypt easy fast	Positive	App Store	0	0	0
App Store	93c36f3b-45b0-4d9b-aa70-87d11f33e3f3	fofeto911	7/5/23 11:37	تطبيق سهل و سلسل و بسيط و جميل				en	sa	anb-arab-national-bank	Beautiful development and progress, creativity, and we hope to always be the best.	ar	beautiful development progress creativity hope always best	Positive	App Store	1	0	0
App Store	fe543d5e-db60-472f-8155-056ecd9d8f9a	Khalef H.A	7/5/23 11:36	Khalef H .A				en	sa	anb-arab-national-bank	Fast application	ar	fast application	Neutral	App Store	0	0	0
App Store	365d1a71-426d-4625-b7ae-653d6cda4888	Abdulrhman sss	7/5/23 11:35	ANB				en	sa	anb-arab-national-bank	Beautiful and easy application ðð¼ð Thank you, Arab.	ar	beautiful easy application thank arab	Positive	App Store	0	0	0
App Store	b6244b64-91cb-4bfc-9286-1b0ce4935a2a	Hani Alahmed	7/5/23 11:31	تطبيق جداااا جميل				en	sa	anb-arab-national-bank	A beautiful application that competes with other banking applications.	ar	beautiful application compete bank applications	Positive	App Store	1	0	0
App Store	c552448e-68b9-4d19-8984-83d37f5d3645	Shorog23	7/5/23 11:30	تطبيق Anb				en	sa	anb-arab-national-bank	Comprehensive, clear, and easy to use.	ar	comprehensive clear easy use	Positive	App Store	0	0	0
App Store	275101f4-7fdb-4fa9-bcde-685c25a2c114	EMAD BINSAID	7/5/23 11:29	Thanks anb				en	sa	anb-arab-national-bank	The application is smooth and fast, and it contains all the services you need from the bank. ð	ar	application smooth fast contain service need bank	Positive	App Store	1	0	0
App Store	e46cfc6f-08b1-4e64-b2a6-767da9c1cbdf	Khaled77zoro	7/5/23 11:29	تطبيق ممتاز جدا جدا				en	sa	anb-arab-national-bank	The application is very easy and it explains all the details that a person needs, such as points, speed, and ease of use for all services through it. It is also very well protected with an excellent security system. A fantastic application.	ar	application easy explain detail person need point speed ease use service also well protect excellent security system fantastic application	Positive	App Store	0	0	0
App Store	195f3778-f7da-4e9d-a76c-28f74a57d40f	Ali hijj	7/5/23 11:28	تطبيق العربي				en	sa	anb-arab-national-bank	Excellent application and service	ar	excellent application service	Positive	App Store	0	0	0
App Store	5f94e179-f6ed-4999-8b6c-6076b3945c9f	ابو نويدر	7/5/23 11:27	تقييم التطبيق				en	sa	anb-arab-national-bank	Beautiful and easy-to-use application	ar	beautiful easytouse application	Positive	App Store	0	0	0
App Store	bc40fbce-2e9c-4ed5-9f7a-2d24bf67368c	FMS80595	7/5/23 11:27	التطبيق جميل جدا				en	sa	anb-arab-national-bank	Very nice app	ar	nice app	Positive	App Store	0	0	0
App Store	15067ffd-7c53-4599-b74a-0e9512dddee9	Turkialhadidi	7/5/23 11:24	عن التطبيق				en	sa	anb-arab-national-bank	A beautiful application and using the application is easier.	ar	beautiful application use application easy	Positive	App Store	0	0	0
App Store	464c64af-f72b-4c6f-af13-a496a5ef5287	Raid VII	7/5/23 11:24	نقلة فريدة				en	sa	anb-arab-national-bank	A unique leap, presenting services in a simplified manner, and we are waiting for the activation of the features and future steps of the application.	ar	unique leap present service simplify manner wait activation feature future step application	Positive	App Store	1	0	0
App Store	c94b1007-0a85-4565-96cc-aa08c0e53b9e	Alaa098765Ali	7/5/23 11:22	سهل ومريح				en	sa	anb-arab-national-bank	Available are the services that I need with ease and convenience. Thank you, ANB.	ar	available service need ease convenience thank anb	Positive	App Store	1	0	0
App Store	a3df2f75-eb41-4ec4-bacb-34ec0615a18f	lainde	7/5/23 11:19	تطبيق سهل وممتاز				en	sa	anb-arab-national-bank	An easy, excellent, and very wonderful application.	ar	easy excellent wonderful application	Positive	App Store	0	0	0
App Store	dc4428d1-4c40-4c91-983a-e480ca36a5bf	khalid alediyani	7/5/23 11:19	تطبيق متكامل يفي بجميع متطلبات العميل سهل نتمنى لكم التوفيق				en	sa	anb-arab-national-bank	A comprehensive application that meets all customer requirements, easy to use. We wish you success.	ar	comprehensive application meet customer requirements easy use wish success	Positive	App Store	0	0	0
App Store	a314c4f2-63b2-4443-89ee-f9e9529d1333	zohermallah	7/5/23 11:14	رائع				en	sa	anb-arab-national-bank	Very easy	ar	easy	Positive	App Store	0	0	0
App Store	6544f121-6a4b-438a-b23b-b8f8041896ea	outsuloll	7/5/23 11:13	تطبيق جميل				en	sa	anb-arab-national-bank	A beautiful application that serves the user. Thank you, Arab Bank.	ar	beautiful application serve user thank arab bank	Positive	App Store	0	0	0
App Store	73ec7abe-6638-47b1-b9f4-dcd4751f82c2	Majed haraf	7/5/23 11:12	تقييم				en	sa	anb-arab-national-bank	This program is excellent and deserves high praise. Thank you, Arab Bank.	ar	program excellent deserve high praise thank arab bank	Positive	App Store	0	0	0
App Store	fadb30bb-64bc-4e26-92c1-3139e1c0ed69	Bin-5alid	7/5/23 11:09	MAlwushayh				en	sa	anb-arab-national-bank	We are proud to share this application, to facilitate banking transactions, you must download this application.	ar	proud share application facilitate bank transactions must download application	Positive	App Store	1	0	0
App Store	b8d47cb4-0fab-4f46-b0f5-61d50888dc1f	أحمد فارع	7/5/23 11:08	تطبيق العربي				en	sa	anb-arab-national-bank	Excellent, secure, and easy-to-use application	ar	excellent secure easytouse application	Positive	App Store	0	0	0
App Store	233e8616-400b-4027-a617-1621bf54e21f	‏بيرفكت	7/5/23 11:07	Abha				en	sa	anb-arab-national-bank	Excellent and only needs adjustment in writing numbers to English for conversion or payment.	ar	excellent need adjustment write number english conversion payment	Positive	App Store	1	1	0
App Store	6d58f7c6-8a76-4f6c-8470-69237d9c6887	118 F	7/5/23 11:07	Fares				en	sa	anb-arab-national-bank	The best app ever.	ar	best app ever	Positive	App Store	0	0	0
App Store	9d847d21-fc9e-4667-a26a-14b9621d2e71	badran001	7/5/23 11:06	تطبيق مميز				en	sa	anb-arab-national-bank	A special and easy-to-use application that allows you to carry out all your financial transactions with ease and speed.	ar	special easytouse application allow carry financial transactions ease speed	Positive	App Store	0	1	0
App Store	6bbf1524-48e5-415e-b03c-c3a9379de60b	Ali f a	7/5/23 11:05	The best				en	sa	anb-arab-national-bank	The development of National Arab Bank's services deserves praise and gratitude, especially the application. It provides exceptional services, speed, ease, and multiple options.	ar	development national arab bank service deserve praise gratitude especially application provide exceptional service speed ease multiple options	Positive	App Store	0	0	0
App Store	15bdcef5-6f3a-424c-a2eb-25d90badc643	saleh abdullah11	7/5/23 11:05	18909				en	sa	anb-arab-national-bank	A very beautiful and easy-to-use application.	ar	beautiful easytouse application	Positive	App Store	0	0	0
App Store	3be2421f-3bc0-4678-99f5-061ee003161e	faisal325	7/5/23 11:05	101				en	sa	anb-arab-national-bank	The most beautiful application ðfaisal	ar	beautiful application faisal	Positive	App Store	0	0	0
App Store	cc2d33c6-a42e-4929-8651-4f5a1d91185c	مهدي الوعله	7/5/23 11:04	تطبيق البنك العربي موبايل				en	sa	anb-arab-national-bank	The Arab Bank Mobile application is considered the best banking application, surpassing all competing banks. This indicates the technical and knowledge advantage of the managers, and it is also considered one of the most secure applications against hacking. Mahdi Alwaaleh 61747.	ar	arab bank mobile application consider best bank application surpass compete bank indicate technical knowledge advantage managers also consider one secure applications hack mahdi alwaaleh	Positive	App Store	1	0	0
App Store	283161bd-1b21-43cd-ac55-d332bfe07b65	عتيجان ال ذيبان 111	7/5/23 11:03	عتيجان ال ذيبان				en	sa	anb-arab-national-bank	Thank you for the excellent and distinctive service that makes it easy for customers to go through all their procedures and meet their needs.	ar	thank excellent distinctive service make easy customers go procedures meet need	Positive	App Store	0	0	0
App Store	b6595131-0fc5-42a8-8865-708701e39fb1	روعه جميله بس انها مقرفه شوي	7/5/23 11:01	التطبيق من افضل التطبيقات				en	sa	anb-arab-national-bank	I trust the developers of the bank for this application, and the new application will be one of the best banking applications for the year 2023. It will have easy navigation, fast procedures, and provide all services.	ar	trust developers bank application new application one best bank applications year easy navigation fast procedures provide service	Positive	App Store	0	0	0
App Store	71a56680-6cc1-498e-a3de-86c637e1603f	54110	7/5/23 11:00	تطبي اي ان بي الجديد				en	sa	anb-arab-national-bank	Great application and artist.	ar	great application artist	Positive	App Store	0	0	0
App Store	48a0f517-06d5-4084-b524-53cf1e485344	ماجدنا	7/5/23 11:00	تقييم				en	sa	anb-arab-national-bank	Excellent application	ar	excellent application	Positive	App Store	0	0	0
App Store	57ba85e6-ab35-4293-8ef2-55e4bbee4291	Banderosn	7/5/23 10:59	Bander1				en	sa	anb-arab-national-bank	An application that is more beautiful than wonderful, with features and options, and ease of use, and with a magnificent design. Thank you.	ar	application beautiful wonderful feature options ease use magnificent design thank	Positive	App Store	0	0	0
App Store	bafbb811-0e30-48e2-85e3-b0ec47b3c900	ابو طلول	7/5/23 10:59	متعب العتيبي				en	sa	anb-arab-national-bank	A beautiful application with distinctive features, options, and exceptional ease of use, developed from one improvement to another ANB ð.	ar	beautiful application distinctive feature options exceptional ease use develop one improvement another anb	Positive	App Store	1	0	0
App Store	afe2dbc4-7038-4ff1-8c16-7ce222d99154	Mohammed 1099	7/5/23 10:59	تطبيق رائع جدا				en	sa	anb-arab-national-bank	The application is excellent, very easy and smooth as well.	ar	application excellent easy smooth well	Positive	App Store	0	0	0
App Store	2cf2fe35-769e-4f8e-934c-d6f773b0d8aa	ابو بيان 911	7/5/23 10:58	تطبيق شامل				en	sa	anb-arab-national-bank	"An excellent and comprehensive application for everything the customer needs. Thank you, ANB."	ar	excellent comprehensive application everything customer need thank anb	Positive	App Store	0	0	0
App Store	7651dafd-fb08-4e08-a779-b77dc5278b46	Arajko	7/5/23 10:58	nice app 👍🏻				en	sa	anb-arab-national-bank	The Arab Bank is constantly developing ðð»	ar	arab bank constantly develop	Neutral	App Store	1	0	0
App Store	1181ff6e-d301-4162-bca7-17761aa39d86	الجندي المجهول1	7/5/23 10:58	تعليق				en	sa	anb-arab-national-bank	Honestly, the application is beautiful, easy, and comprehensive. I just hope that some errors in the application can be corrected, as some icons have not been opened yet.	ar	honestly application beautiful easy comprehensive hope errors application correct icons open yet	Positive	App Store	1	1	0
App Store	0b5756d1-866f-495f-a320-f3823f5a756d	Qwerttyggjj	7/5/23 10:58	تطبيق ومتجر البنك العربي الوطني				en	sa	anb-arab-national-bank	You excel in everything that the word entails. You are the creators of success for the employees and customers of the Arab bank. Thank you, Arab Bank, for the fantastic application. â­ï¸â­ï¸â­ï¸â­ï¸â­ï¸	ar	excel everything word entail creators success employees customers arab bank thank arab bank fantastic application	Positive	App Store	1	0	0
App Store	85ea421e-788f-4ac0-8f02-60863046612a	qutoqo	7/5/23 10:57	ممتاز				en	sa	anb-arab-national-bank	Very excellent and useful.	ar	excellent useful	Positive	App Store	0	0	0
App Store	fbff073f-3aef-4311-8528-32b7c5e07511	Hind 58162	7/5/23 10:57	ANB				en	sa	anb-arab-national-bank	Easy, fast, and comprehensive application that always puts Arabic first ð	ar	easy fast comprehensive application always put arabic first	Positive	App Store	0	0	0
App Store	31e454f1-7e7c-4f33-968c-37d74ca793be	Fawazp	7/5/23 10:56	تطبيق				en	sa	anb-arab-national-bank	Ease and flexibility in the application. ðð»	ar	ease flexibility application	Neutral	App Store	0	0	0
App Store	86d0386e-413c-4493-8ce5-495b94d42189	a70170	7/5/23 10:56	ممتاز جدا				en	sa	anb-arab-national-bank	Very easy and wide options and easy. Thank you.	ar	easy wide options easy thank	Positive	App Store	0	0	0
App Store	b2ada1c4-6b5b-4e2e-89d1-41400284f024	Naief abo ghuraib	7/5/23 10:56	العربي موبايل				en	sa	anb-arab-national-bank	The application is outstanding and provides many services.	ar	application outstanding provide many service	Positive	App Store	1	0	0
App Store	c68553c8-8d15-4cdb-bba9-aeca1d291ae2	Sad smile	7/5/23 10:55	تطبيق اكثر من رائع				en	sa	anb-arab-national-bank	An excellent application.	ar	excellent application	Positive	App Store	0	0	0
App Store	b82641c4-f150-4eab-8eab-c0221915d329	محمد الناغي	7/5/23 10:54	تطبيق ممتاز				en	sa	anb-arab-national-bank	Excellent application and easy to use, I thank the developers for their efforts.	ar	excellent application easy use thank developers efforts	Positive	App Store	0	0	0
App Store	933cf555-0d10-450b-a974-fed4057e2066	ali 18694	7/5/23 10:54	بنك العربي				en	sa	anb-arab-national-bank	Beautiful.	ar	beautiful	Positive	App Store	0	0	0
App Store	db710aab-6c3e-482b-9db6-e30a9f0f7aaa	Hossam 120	7/5/23 10:53	Anb app 🤍				en	sa	anb-arab-national-bank	A very beautiful application with a completely new interface, Anb ð¤.	ar	beautiful application completely new interface anb	Positive	App Store	1	0	0
App Store	2a1f4950-9f29-4e7f-a53a-36416d056f4c	ابو خالد18586	7/5/23 0:04	تطبيق ممتاز				en	sa	anb-arab-national-bank	A wonderful application.	ar	wonderful application	Positive	App Store	0	0	0
App Store	3adfa1bb-79c3-47c8-99ff-636b982208fe	اعزعزعزعز	7/4/23 17:03	جميل جدا اشكر جهودكم الجباره				en	sa	anb-arab-national-bank	Thank you, exceptional application 8479. Nice	ar	thank exceptional application nice	Positive	App Store	0	0	0
App Store	d2619bf8-8e09-49a9-b510-ce80f2b99cdc	212/392	7/4/23 10:58	212				en	sa	anb-arab-national-bank	The application is excellent.	ar	application excellent	Positive	App Store	0	0	0
App Store	3dd97c0a-e48c-4759-af09-0237f4eb5a90	Sami A Asiri	7/3/23 11:24	Samta				en	sa	anb-arab-national-bank	The application is very excellent. Sami Asiri 60582	ar	application excellent sami asiri	Positive	App Store	0	0	0
App Store	7176747f-806b-4cdf-8bd3-0fab86060568	اللي بيمبربه المثل	7/3/23 10:17	ممتاز Excellent				en	sa	anb-arab-national-bank	The application is beautiful, clear, easy to use, and has a comprehensive set of features. It includes all my money in one place, as well as education and instructions. It also has quick procedures to provide the needs of all customers. Thank you for your efforts.	ar	application beautiful clear easy use comprehensive set feature include money one place well education instructions also quick procedures provide need customers thank efforts	Positive	App Store	0	0	0
App Store	a30f82f1-16e6-4ba0-a447-ab52f5934bbd	aloshi57	7/3/23 10:15	ANB				en	sa	anb-arab-national-bank	An application that deserves 5 stars, includes many services and is easy to use.	ar	application deserve star include many service easy use	Positive	App Store	1	0	0
App Store	b58c3d45-c589-474f-8a0f-e2b08b45dea2	badr abu saleh	7/3/23 10:00	تطبيق سهل وممتاز				en	sa	anb-arab-national-bank	The application enjoys many features and benefits.	ar	application enjoy many feature benefit	Positive	App Store	0	0	0
App Store	385aab5d-5a72-4248-acef-06d7ae17a01a	Nabeel6017	7/3/23 9:58	من اروع واجمل التطبيقات حاليا				en	sa	anb-arab-national-bank	One of the best and most beautiful applications currently.	ar	one best beautiful applications currently	Positive	App Store	0	0	0
App Store	3dc80d07-9456-46d6-8770-3cead786ecf2	Waleed 1122	7/3/23 9:51	تطبيق رائع				en	sa	anb-arab-national-bank	Wonderful application	ar	wonderful application	Positive	App Store	0	0	0
App Store	b3130047-8cbb-4139-ab0e-9b9ccef3248d	Bandertk11	7/3/23 9:49	سهل وسريع				en	sa	anb-arab-national-bank	Easy to use and excellent.	ar	easy use excellent	Positive	App Store	0	0	0
App Store	77733790-9f6b-44b5-9d5f-a3b1eecbc749	ebra7imo	7/3/23 9:47	افخم تطبيق 🤓				en	sa	anb-arab-national-bank	The most luxurious application ð¤	ar	luxurious application	Positive	App Store	1	0	0
App Store	4f1a1e3d-47cd-461d-bb57-d8cc059a108a	محمد ٢٣٠	7/3/23 9:47	تطبيق سهل وشامل				en	sa	anb-arab-national-bank	The new update has made the application easier and faster than before, and it includes all services.	ar	new update make application easy fast include service	Positive	App Store	0	0	0
App Store	7ca0f972-45ee-423b-a8da-1d08186dd5e6	naalotaibi	7/3/23 9:41	تطبيق ممتاز				en	sa	anb-arab-national-bank	Very smooth and it pulls you in with its truly wonderful design, you did a great job.	ar	smooth pull truly wonderful design great job	Positive	App Store	0	0	0
App Store	92c44613-3572-42d4-9d59-0a92d833d801	Yousef Abdullah Moj	7/3/23 9:40	افضل تطبيق بنكي على الاطلاق				en	sa	anb-arab-national-bank	Clear and rapid development of banking services at ANB. The application contains all your banking transactions. It offers new and clear shortcuts, easy payment operations, hassle-free transfer of data, and high security.	ar	clear rapid development bank service anb application contain bank transactions offer new clear shortcuts easy payment operations hasslefree transfer data high security	Positive	App Store	1	1	0
App Store	a582417d-3bbb-4e83-b457-ec567d25efb4	فارس الحمدان	7/3/23 9:39	تطبيق بطل				en	sa	anb-arab-national-bank	Very beautiful.	ar	beautiful	Positive	App Store	0	0	0
App Store	cb6aa9cb-4c2c-4cbb-83ad-f225d3fcae46	محمد ال رافع07	7/3/23 9:36	👍🏼				en	sa	anb-arab-national-bank	Easy application	ar	easy application	Positive	App Store	0	0	0
App Store	198bb95a-b9c5-4a0c-bca3-7406529ef48b	Mohammed bin Khalid A	7/3/23 9:35	ممتاز جدا				en	sa	anb-arab-national-bank	Arab National Bank (ANB) has become one of the best banks technologically in the Middle East, not only in the Kingdom. Only those who are well-informed know the accuracy of my statement.	ar	arab national bank anb become one best bank technologically middle east kingdom wellinformed know accuracy statement	Positive	App Store	1	0	0
App Store	12b1379f-a631-4e92-9261-ebcd476824e4	Alirah20	7/3/23 9:24	تطبيق جميل				en	sa	anb-arab-national-bank	The application is excellent and has many banking services such as money transfers, account management, balance checking, tracking of banking operations, and much more.	ar	application excellent many bank service money transfer account management balance check track bank operations much	Positive	App Store	1	1	0
App Store	e9020ade-c02c-4f20-b81c-4ee580789ada	Ahmed Wali 3041	7/3/23 9:22	تطبيق اكثر من رائع				en	sa	anb-arab-national-bank	Many new services have been added to make the program experience faster and easier, including number conversion.	ar	many new service add make program experience fast easy include number conversion	Positive	App Store	0	1	0
App Store	624168c4-9048-4bfe-83e4-3c04ac9ec5c7	نموذج من البراامج الفاشله.	7/3/23 9:20	ونِعم التطبيق .				en	sa	anb-arab-national-bank	A very excellent application, with the new bank identity and the development of services in it, and ease of use. Even financing and cards can be executed through it. Honestly, we are proud of you, ANB.	ar	excellent application new bank identity development service ease use even finance card execute honestly proud anb	Positive	App Store	1	0	0
App Store	38351414-622e-4059-955e-e8c1e4f90f63	alshiaan	7/3/23 9:19	👍				en	sa	anb-arab-national-bank	An application that represents the new identity of the bank and the direction towards improvement.	ar	application represent new identity bank direction towards improvement	Neutral	App Store	1	0	0
App Store	15bfc2bd-c12d-4675-ac71-e0ac47e75599	Zaki sagga	7/3/23 9:14	تطبيق رائع جدا وسهل جدا				en	sa	anb-arab-national-bank	Very wonderful and very easy application.	ar	wonderful easy application	Positive	App Store	0	0	0
App Store	817e1aab-1dbe-49fc-b018-fc17e40ac9f9	Nader518	7/3/23 9:14	anb mobile				en	sa	anb-arab-national-bank	The application is in constant development and comprehensive in all the services provided by the bank. ðð»	ar	application constant development comprehensive service provide bank	Positive	App Store	1	0	0
App Store	3cbe1f99-ba1b-419a-9116-98fde1cee697	حمدان العنزي 1987	7/3/23 9:13	ممتاز				en	sa	anb-arab-national-bank	One of the best available and used applications for me.	ar	one best available use applications	Positive	App Store	0	0	0
App Store	572884fd-0644-4041-be32-f53196d3accb	saud sultan 3834	7/3/23 9:13	سعود سلطان				en	sa	anb-arab-national-bank	A very amazing and advanced application.	ar	amaze advance application	Positive	App Store	0	0	0
App Store	0c64cd5e-e0a3-4c5e-8eba-907301907e8f	Abdulrhman2344	7/3/23 9:12	تطبيق حضاري وجميل				en	sa	anb-arab-national-bank	An easy application with all services available in a civilized and beautiful manner.	ar	easy application service available civilize beautiful manner	Positive	App Store	0	0	0
App Store	9baef19f-bc5f-4d48-99b9-7d1993b79374	jalawi_osaimi	7/3/23 9:12	ممتاز .				en	sa	anb-arab-national-bank	An easy-to-use application that the bank appreciates the development of, and we always wish them the best.	ar	easytouse application bank appreciate development always wish best	Positive	App Store	0	0	0
App Store	b54b531c-5752-4252-8432-478f08978aaf	AliSAsiri	7/3/23 9:09	Anb				en	sa	anb-arab-national-bank	A very beautiful and easy-to-use application.. towards exceptional banking services ð	ar	beautiful easytouse application towards exceptional bank service	Positive	App Store	0	0	0
App Store	4df3455d-9809-48ce-aa8f-7781eca6e821	Khayyat7	7/2/23 10:47	تطبيق ممتاز جدا				en	sa	anb-arab-national-bank	Excellent and very practical application, it's awesome. *511108	ar	excellent practical application awesome	Positive	App Store	0	0	0
App Store	b8a6e730-2cc9-4685-a765-5f1b8836b767	Chaherli	7/3/23 8:20	التطبيق لايعمل حاليا				en	sa	anb-arab-national-bank	Every time I try to log in, it shows me that it is not possible to log in now.	ar	every time try log show possible log	Negative	App Store	0	1	0
App Store	2b99e8d2-1734-4edc-a946-a8a250caeff9	Alaa hassan 55096	7/2/23 10:35	تطبيق البنك العربي الوطني الجديد				en	sa	anb-arab-national-bank	Ease of use Speed in accomplishment Beautiful	ar	ease use speed accomplishment beautiful	Positive	App Store	0	0	0
App Store	a5ecf176-23a3-4b97-ba22-10dbcf8b1594	Saud9999	7/2/23 6:27	تحويل سريع وسهل				en	sa	anb-arab-national-bank	Great application, easy to use and competitive prices. Transfer number 237081805801.	ar	great application easy use competitive price transfer number	Positive	App Store	0	0	0
App Store	3525446f-2d31-4f64-ba3f-e792b3f4bb86	المحتار. عابر القارات	7/2/23 6:26	التطبيق الجديد. البنك.				en	sa	anb-arab-national-bank	Easy to use. And a distinctive shape. 4164	ar	easy use distinctive shape	Positive	App Store	0	0	0
App Store	ee8c9d48-198b-497c-b5ef-d2eb6d98975b	Alanoud63408	7/2/23 6:23	Alanoud alrowdhan 63408				en	sa	anb-arab-national-bank	The application is very excellent and easy to use.	ar	application excellent easy use	Positive	App Store	0	0	0
App Store	1b7e1e58-bfe0-4cb8-9413-350af134d90b	محمود حلمي	7/2/23 6:06	تحديث روووعه				en	sa	anb-arab-national-bank	"An amazing update, we hope for more progress and success."	ar	amaze update hope progress success	Positive	App Store	1	0	0
App Store	587ce130-7bb2-4a6c-9ac2-4f5cefaecb8e	aannnmmmmmm	6/30/23 10:03	Anb				en	sa	anb-arab-national-bank	There is a noticeable and beautiful development in the application. The options have become clearer and it is easier to access banking services. -62642	ar	noticeable beautiful development application options become clear easy access bank service	Positive	App Store	1	0	0
App Store	20fd45d9-1035-4bd1-9f24-1959ef662094	تطبيق العربي	6/30/23 3:50	ما بشتغل				en	sa	anb-arab-national-bank	I don't work.	ar	dont work	Neutral	App Store	0	1	0
App Store	01923478-eb59-4e62-ad61-6877d34c27de	shahad bagarish	6/27/23 17:17	اكثر من رائع				en	sa	anb-arab-national-bank	A unique and easy-to-use design that caters to all banking needs and requests, providing an exceptional experience.	ar	unique easytouse design cater bank need request provide exceptional experience	Positive	App Store	1	0	0
App Store	5c2f9053-cc49-432a-914d-f403fa6b0f4b	Bander*150100	6/26/23 14:59	تطبيق عصري ومميز				en	sa	anb-arab-national-bank	Excellent application keeping pace with the development of digital banking. *150100	ar	excellent application keep pace development digital bank	Positive	App Store	0	0	0
App Store	325db81a-1f60-46b2-a898-3f4d173f8907	mohmmaed alahmaide	6/27/23 9:07	مميز و سهل الاستخدام 🫡				en	sa	anb-arab-national-bank	It gathers all the required services and is easy to use. Thank you, ANB.	ar	gather require service easy use thank anb	Positive	App Store	0	0	0
App Store	d4c7dceb-1fe3-453e-8664-237a94208bef	ابو احمد لوز	6/26/23 14:19	تقيم تطبيق				en	sa	anb-arab-national-bank	A distinctive and easy-to-use application for bank employees and bank customers. Thank you, Arab Bank.	ar	distinctive easytouse application bank employees bank customers thank arab bank	Positive	App Store	0	0	0
App Store	7428347c-8c20-44b7-91d4-163c0c011364	Majdah 4118	6/26/23 12:46	تقييم				en	sa	anb-arab-national-bank	The application is really great.	ar	application really great	Positive	App Store	0	0	0
App Store	83592137-467c-4a12-a2c2-d5908577de13	T2ork2023t	6/25/23 23:12	تطبيق جميل وسهل شكراً anb				en	sa	anb-arab-national-bank	"Beautiful and easy application. Thank you."	ar	beautiful easy application thank	Positive	App Store	0	0	0
App Store	662bb747-cdd4-4a3a-b2c7-837f747be089	Ibbi1529	6/25/23 21:05	ANB APP				en	sa	anb-arab-national-bank	An easy-to-use, distinctive, modern, and comprehensive application for all services. In short, it is said that it started where others ended. Wall don ANBð (unclear meaning)	ar	easytouse distinctive modern comprehensive application service short say start others end wall anb unclear mean	Neutral	App Store	1	0	0
App Store	e922fe58-7029-4eae-b945-05ee424f8160	63307	6/25/23 18:43	تطبيق رائع				en	sa	anb-arab-national-bank	The application is fast, easy, and simple to use.	ar	application fast easy simple use	Positive	App Store	0	0	0
App Store	f25305e9-a848-4165-ab85-5ce558730c1b	Albaghawi	6/25/23 18:06	التطبيق جميل جدا				en	sa	anb-arab-national-bank	The application is very beautiful	und	application beautiful	Positive	App Store	0	0	0
App Store	46dac80c-f36a-4518-af22-0c1902fac1d7	baderjunidi	6/25/23 16:35	Br 135				en	sa	anb-arab-national-bank	Ext ; 122 - 133 Branch 135	en	ext branch	Neutral	App Store	0	1	0
App Store	c1020462-fe69-424d-812c-025be1584a12	Abdulkarim Almojaly	6/25/23 17:21	التطبيق الحالي والجديد لايعمل				en	sa	anb-arab-national-bank	The current and new application does not work		current new application work	Negative	App Store	0	1	0
App Store	ebf3b59e-4166-48bc-84a7-63878674246c	الموظف أمجد	6/25/23 15:57	تطبيق anb				en	sa	anb-arab-national-bank	The application deserves 10 stars.	ar	application deserve star	Positive	App Store	1	0	0
App Store	07521ebf-3163-4d85-84c8-1482e9ef30de	Ddhddvdbdb	6/25/23 15:35	برنامج جميل جدا				en	sa	anb-arab-national-bank	"And Allah is better than what came before, quick and in better choices, no mistake, mashallah transformation 8824."	ar	allah good come quick good choices mistake mashallah transformation	Positive	App Store	1	0	0
App Store	13b3e8e0-c3f6-439d-89dd-11ed0563126e	Fahad 8222	6/25/23 15:34	العربي				en	sa	anb-arab-national-bank	The best program in terms of experience, usage, speed, and efficiency. I highly recommend it. Thank you, Arab Bank. Ex: 8222	ar	best program term experience usage speed efficiency highly recommend thank arab bank ex	Positive	App Store	0	0	0
App Store	daa9ef2c-c2fd-4328-84f9-f9f131430973	تربتبنييلزنبهعللميهبب	6/25/23 15:28	anb app				en	sa	anb-arab-national-bank	Advanced application and a more beautiful display of details. Thank you.	ar	advance application beautiful display detail thank	Positive	App Store	0	0	0
App Store	61ce3a6f-e1cf-4b56-8e82-d6b0e7683b23	SAA 64839	6/25/23 15:10	Great App 👌🏼				en	sa	anb-arab-national-bank	Thank ANB for the rapid progress and simulation of customer requirements, and from success to success, God willing, 64839.	ar	thank anb rapid progress simulation customer requirements success success god will	Positive	App Store	1	0	0
App Store	c0d7f9de-36d2-4004-ae72-f6b293c2a082	hoor💕	6/25/23 15:00	excellent				en	sa	anb-arab-national-bank	Very cool app ð*327100	en	cool app	Positive	App Store	0	0	0
App Store	3a2749ce-bdce-4f59-8bda-d2a21d672f38	Fahmi albuali	6/25/23 14:56	Fahmi albuali				en	sa	anb-arab-national-bank	A unique application with a modern design, great technology, special features, and ease of use that allows all customers to enjoy all services. Thank you, Arab National Bank, for your development and creativity.	ar	unique application modern design great technology special feature ease use allow customers enjoy service thank arab national bank development creativity	Positive	App Store	0	0	0
App Store	6534202c-915e-4601-8145-6c8cb25a8744	Afaf20002	6/25/23 14:53	تطبيق مميز ورائع				en	sa	anb-arab-national-bank	A wonderful application designed professionally and easy to use.	ar	wonderful application design professionally easy use	Positive	App Store	0	0	0
App Store	eaaab12b-2378-424b-8e62-8d3ecd229812	Abdulaziz_999	6/25/23 14:48	تطبيق البنك العربي للجديد المميز				en	sa	anb-arab-national-bank	"An exceptional application and easier banking services. Arab Bank always amazes us ð"	ar	exceptional application easy bank service arab bank always amaze us	Positive	App Store	0	0	0
App Store	3198a3f8-1838-49c6-aaf0-e784a7c9e2de	Alihak12	6/25/23 14:46	تطبيقي 👍🏻				en	sa	anb-arab-national-bank	The Arabic application... gives you	ar	arabic application give	Neutral	App Store	1	0	0
App Store	ea2b6532-063b-4212-8365-5536d5529f37	qzqz69	6/25/23 14:36	الف مبروك				en	sa	anb-arab-national-bank	A good step forward. I wish you more success and prosperity â¤ï¸ 56907 Extension / 7060	ar	good step forward wish success prosperity extension	Positive	App Store	0	0	0
App Store	eb44808b-ca94-43e9-8c1f-1aaef72e2bb2	salamah ali	6/25/23 14:16	Salamah ali 59950				en	sa	anb-arab-national-bank	Very excellent, easy, and safe, it works wonderfully ð thank you ðð»	ar	excellent easy safe work wonderfully thank	Positive	App Store	0	0	0
App Store	5e84afe8-eef3-47d0-8e1f-58f4390749c5	Mo66am	6/25/23 14:01	7952				en	sa	anb-arab-national-bank	Beautiful, modern, and up-to-date application. Easy to use, attractive, and fast.	ar	beautiful modern uptodate application easy use attractive fast	Positive	App Store	0	0	0
App Store	b65690f6-611b-484a-a7e7-18e849c65ab9	Malmuhaid	6/25/23 13:43	سهل وجميل				en	sa	anb-arab-national-bank	All banking options are available, excellent.	ar	bank options available excellent	Positive	App Store	0	0	0
App Store	1bcde5e6-f947-4c95-a51a-34dfaff8036c	NoufKIA	6/25/23 13:48	عمل رائع!!				en	sa	anb-arab-national-bank	Excellent, may God bless you. It needs some modifications regarding certain payment-related details, but overall it is very beautiful, visually pleasing, and easy and quick to use, Mashallah.	ar	excellent may god bless need modifications regard certain paymentrelated detail overall beautiful visually please easy quick use mashallah	Positive	App Store	1	0	0
App Store	198d13ad-12fc-4c66-bcdc-f33d1e5c049b	turkey 55307	6/23/23 10:32	112				en	sa	anb-arab-national-bank	Turkey	en	turkey	Neutral	App Store	0	1	0
App Store	c6856ebd-b8f4-453e-bddf-eb87466a0e47	Sam_2366	6/23/23 4:13	تحويلة رقم/ 7029				en	sa	anb-arab-national-bank	Extension number/ 7029	ar	extension number	Neutral	App Store	0	1	0
App Store	d71acadd-e154-4233-ab95-7177aeb45d4e	Ghazi alsaif	6/22/23 21:09	افضل تطبيق بالسعوديه				en	sa	anb-arab-national-bank	Its translation to English is: "His transformation of 100."	ar	translation english transformation	Neutral	App Store	0	1	0
App Store	e5aa3faf-a323-40f7-aaf4-8d5fdb1c341c	Mutab Abdullah	6/22/23 18:30	Mutab A. D / The best app in Saudi Bank				en	sa	anb-arab-national-bank	One of the best and easiest electronic applications with high user protection and all services are available in the new application of Arab Bank. Currently, no bank offers such services, and all other applications will be abandoned after customers of the bank start using it.	ar	one best easy electronic applications high user protection service available new application arab bank currently bank offer service applications abandon customers bank start use	Positive	App Store	1	0	0
App Store	33276f52-f3c3-4bd7-a05e-7f407acceeaa	salman0760822	6/22/23 18:04	107 59935				en	sa	anb-arab-national-bank	The application is excellent and very high in terms of ease, 107.	ar	application excellent high term ease	Positive	App Store	0	0	0
App Store	0824e599-8a0f-4164-9624-b7f4825c779c	Ayman Enaamuddin	6/22/23 17:31	تقييم برنامج Anb				en	sa	anb-arab-national-bank	Greetings, Ayman Anam Al-Din. *218-127	ar	greetings ayman anam aldin	Neutral	App Store	0	0	0
App Store	9afeb00f-0bea-4bb6-bbd5-9f8e37767171	mamdooh alameel	6/22/23 16:36	مميز				en	sa	anb-arab-national-bank	Distinctive	und	distinctive	Neutral	App Store	1	0	0
App Store	021d3af3-20ed-451e-b16f-b482469aaf34	عبدالعزيز صقر الرشيدي	6/22/23 14:29	8512				en	sa	anb-arab-national-bank	The application is amazing ð¤©â¤ï¸	ar	application amaze	Positive	App Store	0	0	0
App Store	847b7a0c-dbfb-4832-a393-1d58a85a2ed8	Fatimah alhelal	6/22/23 14:14	مشكله				en	sa	anb-arab-national-bank	There is a problem with logging in, it always rejects the login. 70179.	ar	problem log always reject login	Negative	App Store	0	1	0
App Store	b2b9803b-80e6-4cbf-8211-f1f3e7b78d80	محمد سعد بن سعيدان	6/22/23 14:28	4539				en	sa	anb-arab-national-bank	The application is really amazing.	ar	application really amaze	Positive	App Store	0	0	0
App Store	54ef63f5-f1c6-44e5-9ca9-0a4611ca5947	Jehan alsrani	6/22/23 14:04	Anb				en	sa	anb-arab-national-bank	"Great, organized, and clear application. Thank you, ANB."	ar	great organize clear application thank anb	Positive	App Store	0	0	0
App Store	b3cd05cb-cc08-4e6b-92d9-9472beeecd32	الفرقد الدولي	6/22/23 14:01	Anb				en	sa	anb-arab-national-bank	Thank you for the beautiful application. I'm looking forward to your creativity. Stay brilliant and distinguished creators. 330123*	ar	thank beautiful application im look forward creativity stay brilliant distinguish creators	Positive	App Store	1	0	0
App Store	b5de1e38-fa36-49e1-a5a2-7e161c7f5aec	hameed67	6/22/23 13:24	56969. 0370. EXT 100				en	sa	anb-arab-national-bank	Wonderful, easy, clear, and one of the best banking programs.	ar	wonderful easy clear one best bank program	Positive	App Store	0	0	0
App Store	a974c511-0407-4886-ac39-fbdb1adeed9d	Waleed1010	6/22/23 13:23	*105100				en	sa	anb-arab-national-bank	Branch 105 contains 100.	ar	branch contain	Neutral	App Store	1	0	0
App Store	65127199-d1d4-4bba-80a2-689599278bb7	الشهري 220	6/22/23 13:01	تطبيق مميز				en	sa	anb-arab-national-bank	222- Please review this application and release the required updates ... Outstanding ð¹ð¹	ar	please review application release require update outstanding	Neutral	App Store	1	0	0
App Store	37ba480b-c8d0-4d6a-9c2f-ba45d31110bf	رامي نحاس	6/22/23 12:34	*205163				en	sa	anb-arab-national-bank	An application that is extremely easy and beautiful.	ar	application extremely easy beautiful	Positive	App Store	0	0	0
App Store	682a7899-9fa6-4d18-a547-bb07de234af8	Ghas86	6/22/23 12:27	ممتاز				en	sa	anb-arab-national-bank	The ANB application is constantly evolving and more than amazing. Efforts that deserve thanks from the bank management. Transfer *257100.	ar	anb application constantly evolve amaze efforts deserve thank bank management transfer	Positive	App Store	1	0	0
App Store	bd7f3871-097b-47a4-a7a0-195c9c1d0ee2	بتمهل	6/22/23 12:21	سهوله وسلاسه في الاستخدام				en	sa	anb-arab-national-bank	Easy to use and very smooth and comprehensive for all services to facilitate the customer's experience. 212100.	ar	easy use smooth comprehensive service facilitate customers experience	Positive	App Store	0	0	0
App Store	44887210-aef8-43c0-bba5-165e8d41ce42	وليد البلادي 212	6/22/23 12:24	تطيبق رائع جدا😍🔥❤️				en	sa	anb-arab-national-bank	An excellent application that is considered a qualitative leap in Arab Bank, and for the better with the permission of Allah.	ar	excellent application consider qualitative leap arab bank good permission allah	Positive	App Store	1	0	0
App Store	097d909c-0fb5-430b-8b72-08b44fc14bcd	habib 55882	6/22/23 12:18	319122				en	sa	anb-arab-national-bank	A new and very easy-to-use application that includes all services. I advise everyone to use it.	ar	new easytouse application include service advise everyone use	Positive	App Store	0	1	0
App Store	2038b16f-bf7a-415b-beab-0365717cff85	Sh124133	6/22/23 12:12	التطبيق الجديد				en	sa	anb-arab-national-bank	The new Arab National Bank application is more convenient and offers a distinctive and wonderful service. It is an electronic platform that transfers the bank and all its branches to your smartphone, saving time and effort.	ar	new arab national bank application convenient offer distinctive wonderful service electronic platform transfer bank branch smartphone save time effort	Positive	App Store	0	0	0
App Store	e0daa211-729c-43bc-b7a1-17d79e965f1a	ANB مشاري	6/22/23 12:02	122				en	sa	anb-arab-national-bank	I thank ANB for its rapid and noticeable progress. I wish you continued success and prosperity.	ar	thank anb rapid noticeable progress wish continue success prosperity	Positive	App Store	0	0	0
App Store	a05a9198-ea80-4e31-8863-9cb346c3bd9a	gann4as	6/22/23 12:09	بقيق				en	sa	anb-arab-national-bank	Job number 60201. Beautiful development, I wish you success.	ar	job number beautiful development wish success	Positive	App Store	1	0	0
App Store	91dffbad-6fb9-4bf9-94c7-18cb3a628896	ali atawi	6/22/23 11:52	افضل تطبيق بنكي البنك العربي الوطني				en	sa	anb-arab-national-bank	Best banking application A unique and enjoyable experience employee id: 802314 ext: 201	ar	best bank application unique enjoyable experience employee id ext	Positive	App Store	0	0	0
App Store	94ea642d-2ba4-4376-808a-9e0e3ca737b0	ta aatas	6/22/23 11:51	جميل و مميز و سهل				en	sa	anb-arab-national-bank	Beautiful. Distinctive and easy 8023.	ar	beautiful distinctive easy	Positive	App Store	0	0	0
App Store	b5748152-3319-4a13-84e0-55d7f7d09383	7676 alquraish	6/22/23 11:43	👌👏🏻 التطبيق سهل عملي و واضح				en	sa	anb-arab-national-bank	Very easy and clear to navigate between the icons. The bank's digital development and utilization of technological advancements in customer service are evident primarily through the convenience of the services it offers, which are easy and practical for both beginners and new users of the application. There should be no difficulty in using it daily and at any time. The customers are constantly im…	ar	easy clear navigate icons bank digital development utilization technological advancements customer service evident primarily convenience service offer easy practical beginners new users application difficulty use daily time customers constantly impress development new service ease use	Positive	App Store	1	0	0
App Store	0f26e759-3589-4109-bf40-c82bf880ed5b	كان غيرك اشطر	6/22/23 11:42	111				en	sa	anb-arab-national-bank	Mashallah, you Arab, from progress to progress, and from better to better. 111 is one of the best.	ar	mashallah arab progress progress good good one best	Positive	App Store	0	0	0
App Store	38327b21-70c2-4238-a650-171e2384cba9	Ramziha	6/22/23 11:39	تطبيق مميز				en	sa	anb-arab-national-bank	More comprehensive services	ar	comprehensive service	Positive	App Store	0	0	0
App Store	e0aa09a3-e0ea-4be7-9b4d-fe5679d84aee	علي العنزي15	6/22/23 11:39	برنامج امن				en	sa	anb-arab-national-bank	Secure and easy-to-use program.	ar	secure easytouse program	Positive	App Store	0	0	0
App Store	b0fb6bd9-fe47-4707-b1e1-f887a2faa7cd	مبارك عبدالله 77	6/22/23 11:37	تطبيق				en	sa	anb-arab-national-bank	A beautiful, wonderful, and easy-to-use application. It is not complicated. Thank you, Arab Bank. Transfer 133 to 59963.	ar	beautiful wonderful easytouse application complicate thank arab bank transfer	Positive	App Store	1	0	0
App Store	a0ad6a66-7625-40fe-bbdb-17171527ecd3	Nawaf 18688	6/22/23 11:36	تطبيق امان ورائع				en	sa	anb-arab-national-bank	A modern application that keeps up with security challenges to preserve the data and its privacy. It also does not overlook ease of use and the speed of required services.	ar	modern application keep security challenge preserve data privacy also overlook ease use speed require service	Positive	App Store	1	0	0
App Store	e3c81dfb-5567-49b6-a8da-3cc5a2452584	غاااااازي	6/22/23 11:34	تطبيق جميل				en	sa	anb-arab-national-bank	One of the greatest things ever.	ar	one great things ever	Positive	App Store	0	0	0
App Store	03afa8d1-42fa-48f9-886d-2dc53bb66940	Abu Walaa	6/22/23 11:34	جداً عمل بأتقان				en	sa	anb-arab-national-bank	I believe ANB is one of the best banks and always shining. Thank you to the ANB team.	ar	believe anb one best bank always shin thank anb team	Positive	App Store	0	0	0
App Store	d931e37f-4d6d-4511-91fd-4a11067d1515	ahmed bagalagel	6/22/23 11:33	جميل جدا				en	sa	anb-arab-national-bank	A very beautiful and smooth application, the best among banks. From excellence to excellence. *274122	ar	beautiful smooth application best among bank excellence excellence	Positive	App Store	0	0	0
App Store	ae1aa3a2-70e7-414d-9d1c-caeab621b3f1	IBRAHEM ✋🏼✋🏼	6/22/23 11:30	👌👍🏻 قمة الابداع				en	sa	anb-arab-national-bank	It is wonderful for all applications to be in line with the vision of His Royal Highness Crown Prince Mohammed bin Salman, may Allah protect him, in terms of speed and efficient completion of all operations with precision and mastery, and to compete strongly with all banks and other applications with ease and convenience, and to provide all services to all customers and bring everything that is b…	ar	wonderful applications line vision royal highness crown prince mohammed bin salman may allah protect term speed efficient completion operations precision mastery compete strongly bank applications ease convenience provide service customers bring everything beneficial easy customers thank	Positive	App Store	1	0	0
App Store	63983495-dacb-4f0e-bedb-44f43cc4d061	Raeed1914	6/22/23 11:25	تطبيق العربي ❤️4977				en	sa	anb-arab-national-bank	The best application in the Middle East ð¹4977	ar	best application middle east	Positive	App Store	0	0	0
App Store	36e7804d-d6bb-414e-8d28-e2c4e6437ca3	Bassam ALZUHAYRI	6/22/23 11:25	63493				en	sa	anb-arab-national-bank	Honestly, it's the first time in my life that I try a simple and clear application like the Arab Bank application. Thank you to all those involved and working in creating this beautiful application. Thank you, it's a beautiful thing that deserves praise and gratitude. ð¤ð¤ 63493	ar	honestly first time life try simple clear application like arab bank application thank involve work create beautiful application thank beautiful thing deserve praise gratitude	Positive	App Store	1	0	0
App Store	656d662e-4b80-4848-92ab-99cac81bcc3c	Anb 62042	6/22/23 11:22	افضل واسهل واسلس تطبيق بنكي 😍👍🏽 62042				en	sa	anb-arab-national-bank	The best, easiest, and smoothest banking application ððð½ 62042	ar	best easy smooth bank application	Positive	App Store	0	0	0
App Store	a6b19c1c-8cb8-4a37-bc92-deac91d5110c	Khalid bashaori	6/22/23 11:19	تطبيق ممتاز مشاءالله				en	sa	anb-arab-national-bank	Easy and excellent application. Thank you ANB. 222	ar	easy excellent application thank anb	Positive	App Store	0	0	0
App Store	6e61682a-da00-4848-a6bd-bacd018c3a7d	W-m-m	6/22/23 11:18	تطبيق اكثر من رائع				en	sa	anb-arab-national-bank	Honestly, it is an amazing application. Currently, it is the best application among banks. 62924	ar	honestly amaze application currently best application among bank	Positive	App Store	0	0	0
App Store	6472aa04-4c7f-4dcc-bab5-e659385b95a7	Hisham alromih	6/22/23 11:18	سهل ومختصر 320111				en	sa	anb-arab-national-bank	Easy and distinctive.	ar	easy distinctive	Positive	App Store	0	0	0
App Store	99704576-6cfc-40d1-adfc-b610aa1de722	Hadi20309	6/22/23 11:16	ANB				en	sa	anb-arab-national-bank	Flexible and beautiful application. 4428 Hadi.	ar	flexible beautiful application hadi	Positive	App Store	1	0	0
App Store	9cb6eb45-5922-4737-9fbe-ad60d782bbbd	متعب الهويشل	6/22/23 11:16	58091				en	sa	anb-arab-national-bank	The application is easy for everyone.	ar	application easy everyone	Positive	App Store	0	0	0
App Store	4c1ba14a-90fa-4082-a092-4baa9bd78c89	Bushra1546	6/22/23 11:16	1546				en	sa	anb-arab-national-bank	A beautiful application.	ar	beautiful application	Positive	App Store	0	0	0
App Store	c6567e97-511a-4ad4-a5b5-1536076dc6e6	بسام سالم	6/22/23 11:16	anb				en	sa	anb-arab-national-bank	Hello, I advise all bank customers to use the new application. It is easier, faster, and provides all services. ð¤©ðð» With Al-Arabi application, your life is easier and faster. 63256	ar	hello advise bank customers use new application easy fast provide service alarabi application life easy fast	Positive	App Store	0	0	0
App Store	dfd153ec-0c77-4064-87e7-3752987d068b	saad alfayez	6/22/23 11:14	تطبيق مطور وسهل جدًا مميز وتوجد به خدمات كثيرة 🤙🤙🤙				en	sa	anb-arab-national-bank	A very easy-to-use and developed application, it is distinctive and offers many services ð¤ð¤ð¤6171.	ar	easytouse develop application distinctive offer many service	Positive	App Store	1	0	0
App Store	4cb9a8ae-f9b2-4537-bcbc-358847d3374e	ALKESHAN I	6/22/23 11:14	8517				en	sa	anb-arab-national-bank	8517 A wonderful application, provides all the services that satisfy me. It is easy to access, use, and follow the instructions. It is evident that a lot of effort has been put into meeting all the needs of remote operations. Thank you, Arab National Bank, for your excellent services.	ar	wonderful application provide service satisfy easy access use follow instructions evident lot effort put meet need remote operations thank arab national bank excellent service	Positive	App Store	1	0	0
App Store	7f4c7f43-cb3f-4c13-bc93-135ab73a96b5	عبدالمحسن جريد	6/22/23 11:14	تطبيق البنك العربي				en	sa	anb-arab-national-bank	This time the application is great, it contains all kinds of accounts with credit cards. 61414.	ar	time application great contain kinds account credit card	Positive	App Store	1	1	0
App Store	d57acca6-dff9-466b-a252-a2d42a19cbaf	M90908	6/22/23 11:14	تطبيق ممتاز وسلس وواض				en	sa	anb-arab-national-bank	Smooth and excellent application	ar	smooth excellent application	Positive	App Store	0	0	0
App Store	85d9140d-c0a6-48f7-a901-8a073604cc52	s.alo.s	6/22/23 11:12	Anb the best				en	sa	anb-arab-national-bank	One of the best banking applications. Thank you very much for facilitating the service for all application users. His transfer number is - 2534, Saudi.	ar	one best bank applications thank much facilitate service application users transfer number saudi	Positive	App Store	0	0	0
App Store	9462d279-42aa-4f83-9f3d-18c4b742d2f3	Hkzaz	6/22/23 11:10	Amazing Application				en	sa	anb-arab-national-bank	Amazing 3752	en	amaze	Positive	App Store	0	0	0
App Store	775d9c19-552c-4f22-91c0-e2c3fdd449e8	سلطان مسعد 144	6/22/23 11:08	144				en	sa	anb-arab-national-bank	Fast and beautiful	ar	fast beautiful	Positive	App Store	0	0	0
App Store	5f0b8f48-bef3-4d63-882f-16e4c5ec5cb7	FA2030	6/22/23 11:07	تطبيق رائع				en	sa	anb-arab-national-bank	The application is very fantastic, distinctive, and very easy. ð¤ð	ar	application fantastic distinctive easy	Positive	App Store	0	0	0
App Store	352ff8bc-7393-4d2a-a1b7-69f9f2a40996	BANDAR44044	6/22/23 11:06	6297				en	sa	anb-arab-national-bank	I wish you success and progress. The application is excellent, very advanced, and includes all the services.	ar	wish success progress application excellent advance include service	Positive	App Store	1	0	0
App Store	9fe1371d-0794-4d9b-800b-0e8831c3f898	SpishGame	6/22/23 11:05	رهييييب😍😍				en	sa	anb-arab-national-bank	The application is easy, smooth, and better than previous versions. I hope to continue with this improvement.	ar	application easy smooth good previous versions hope continue improvement	Positive	App Store	0	0	0
App Store	03d233e5-db5f-44a2-894a-cb1fe29f1649	ghgfggfvh	6/22/23 11:06	ممتاز				en	sa	anb-arab-national-bank	Very easy application. 279 103	ar	easy application	Positive	App Store	0	0	0
App Store	3b6c17b4-b707-41c9-9187-8fbc31816f46	nasser alawidan	6/22/23 11:04	406 122				en	sa	anb-arab-national-bank	A new window for banking services that matches our aspirations 122.	ar	new window bank service match aspirations	Positive	App Store	1	0	0
App Store	84e8b1b8-67ad-406a-9600-06d41a936fd1	والد حسن الحمادي	6/22/23 11:04	Anb sweet				en	sa	anb-arab-national-bank	The most elegant, easy, and fast application for completing financial transactions.	ar	elegant easy fast application complete financial transactions	Positive	App Store	0	0	0
App Store	80aaf8d8-3f33-4ed5-a6c2-f58dcd332479	Zanaib 190	6/22/23 11:03	Zaj				en	sa	anb-arab-national-bank	A comprehensive application for all diverse services, in one application. With a simple and fast security button. The best unquestionable banking application. ðð»ðð»ðð»ðð»ðð»ðð»ðð» Zainab aljaffar190	ar	comprehensive application diverse service one application simple fast security button best unquestionable bank application zainab aljaffar	Positive	App Store	0	0	0
App Store	fa37f258-01b5-46ad-89b7-03a688fa3bf0	saleh alzaid	6/22/23 11:02	And				en	sa	anb-arab-national-bank	The application is excellent, thank you.	ar	application excellent thank	Positive	App Store	0	0	0
App Store	db436984-bd69-4093-afb3-cd7a11bef355	abodat	6/22/23 11:01	التطبيق جميل				en	sa	anb-arab-national-bank	Very nice application. Converted to number: 101 - Branch 115.	ar	nice application convert number branch	Positive	App Store	1	1	0
App Store	daf20bdc-b1d2-48aa-b592-788917dd5e21	محسن السبيعي ٣٨٠٠	6/22/23 11:01	محسن السبيعي ٣٨٠٠				en	sa	anb-arab-national-bank	A wonderful and very beautiful application.	ar	wonderful beautiful application	Positive	App Store	0	0	0
App Store	a022faa3-9fce-4869-b327-484dab5d021d	رائع جدًا محمد السبيعي - 100	6/22/23 10:59	محمد السبيعي				en	sa	anb-arab-national-bank	The application is really great. Mohammed Al-Subeai 100	ar	application really great mohammed alsubeai	Positive	App Store	0	0	0
App Store	4141f04c-25d5-4172-ad33-df20fbc25520	fahad18628	6/22/23 10:59	من افضل البنوك المملكة 18628				en	sa	anb-arab-national-bank	The best bank in the kingdom in terms of customer service is 18628.	ar	best bank kingdom term customer service	Positive	App Store	0	0	0
App Store	383907c7-1553-4844-a077-545ee177f83d	عمار م	6/22/23 10:57	ممتاز				en	sa	anb-arab-national-bank	An excellent application. *325100	ar	excellent application	Positive	App Store	0	0	0
App Store	03cc73f1-19ad-4ad6-95a7-78acd8031c8c	zvcalopq	6/22/23 10:57	نقلة نوعية				en	sa	anb-arab-national-bank	A wonderful app with unique features, a qualitative leap from the previous version. #418200	ar	wonderful app unique feature qualitative leap previous version	Positive	App Store	0	0	0
App Store	4bdc7099-a70a-43e3-bdb4-25074a2c1029	zooz's	6/22/23 10:56	مرونة				en	sa	anb-arab-national-bank	Easy and beautiful application	ar	easy beautiful application	Positive	App Store	0	0	0
App Store	e7892045-a337-4db7-a23a-a2d5a7b23a06	sul119	6/22/23 10:56	سهل وواضح				en	sa	anb-arab-national-bank	The best banking application among Saudi banks' applications, characterized by clarity and ease of conducting most banking transactions without visiting the branch.	ar	best bank application among saudi bank applications characterize clarity ease conduct bank transactions without visit branch	Positive	App Store	0	0	0
App Store	6b85edff-3fd9-4c39-93a1-67aa8ec427fd	ببلتنمنالزرالقيسسس	6/22/23 10:55	تحويلة 105102*				en	sa	anb-arab-national-bank	Extension 105102	ar	extension	Neutral	App Store	0	1	0
App Store	44dd4c93-ad4c-4531-bfc9-813b37e8ee27	abdulaziz waleed	6/22/23 10:55	تطبيق العربي				en	sa	anb-arab-national-bank	One of the best banking applications with ease in transfer and access to all the services that every customer desires. Job number: 63085	ar	one best bank applications ease transfer access service every customer desire job number	Positive	App Store	0	0	0
App Store	59cd348e-c73f-4b45-95a3-82c8883d7843	Ahmed Alhatem	6/22/23 10:55	التحول الرقمي الافضل 80222123				en	sa	anb-arab-national-bank	The best digital conversion is 80222123.	ar	best digital conversion	Positive	App Store	0	0	0
App Store	d62c0133-9eaf-454c-991f-6d99f7ab03fe	Abu Omar1983	6/22/23 10:54	100				en	sa	anb-arab-national-bank	Wonderful and easy to use.	ar	wonderful easy use	Positive	App Store	0	0	0
App Store	b30a705a-694c-436d-8255-d5f5d3a2470f	al3almi99	6/22/23 10:54	ممتاز				en	sa	anb-arab-national-bank	Easy, comprehensive, and beautiful in appearance. Very distinctive ðð»ðð»8302	ar	easy comprehensive beautiful appearance distinctive	Positive	App Store	0	0	0
App Store	7a364111-4f59-4c9f-935b-d9badf2930be	Mahran janaini	6/22/23 10:54	ابدعتم				en	sa	anb-arab-national-bank	An elegant application with a beautiful design, better and faster than before. 101 conversions.	ar	elegant application beautiful design good fast conversions	Positive	App Store	0	0	0
App Store	ee7f6186-2ac9-4a43-a732-b45c237351ca	Vd7v	6/22/23 10:54	شكرا anb				en	sa	anb-arab-national-bank	A beautiful and very easy to use application. *147123	ar	beautiful easy use application	Positive	App Store	0	0	0
App Store	13884836-93c3-4095-addd-25679b1ca6aa	Musa alshardi	6/22/23 10:53	تطبيق مميز				en	sa	anb-arab-national-bank	The application interface has been improved and all services are very easy.	ar	application interface improve service easy	Positive	App Store	0	0	0
App Store	ff9b6a86-89ef-447d-9580-2c4b9f4e2a7f	327101	6/22/23 10:53	327101				en	sa	anb-arab-national-bank	Beautiful modifications and easy and wonderful application.	ar	beautiful modifications easy wonderful application	Positive	App Store	0	0	0
App Store	7daa73a2-8ff5-428e-baf8-21fa53acfdc3	Saleh.1994sa	6/17/23 18:33	التطبيق ما اقدر اسجل دخول فيه				en	sa	anb-arab-national-bank	Every time I try to log in, it tells me "You cannot log in without an invitation from Bas."	ar	every time try log tell log without invitation bas	Neutral	App Store	0	1	0
App Store	11124739-7703-4c5d-8568-a6dda225cab7	Hattan124	7/11/23 12:56	افضل واسهل تطبيق بين البنوك				en	sa	anb-arab-national-bank	The best and easiest application among the banks	en	best easy application among bank	Positive	App Store	0	0	0
App Store	4f60807d-2a93-4a5f-85b3-6d9fb079b93b	منيره عبدالله السبيعي	7/6/23 8:28	😍				en	sa	anb-arab-national-bank	Very significant development, clearly illustrating all the details that the employee and the customer need. Thank you for your efforts. ð	ar	significant development clearly illustrate detail employee customer need thank efforts	Positive	App Store	1	0	0
App Store	f25de517-5024-4d10-8128-d0cd06e0fed8	mansour1399	7/3/23 9:28	تطيبق رائع جداا ويتميز بسهوله استخدامه				en	sa	anb-arab-national-bank	The application is very wonderful and is characterized by its ease of use.	und	application wonderful characterize ease use	Positive	App Store	0	0	0
App Store	c2a66013-3c91-4188-85f8-64ec47ccfc5a	Eng,Moh	6/30/23 7:24	سيء				en	sa	anb-arab-national-bank	Terrible and does not work!!!!!! The ratings are all lies and deceit from the same company and the same employees with their job numbers!!!! The managers laugh at the employees and the employees are enthusiastic and raise the app's rating to please the manager?!!!! Please, let the relevant authority look into this matter...	ar	terrible work ratings lie deceit company employees job number managers laugh employees employees enthusiastic raise apps rat please manager please let relevant authority look matter	Negative	App Store	1	1	0
App Store	bf6ad38e-ca24-4100-8116-e7de0fc2418d	Hb43l	6/25/23 19:25	63340				en	sa	anb-arab-national-bank	63340	und		Neutral	App Store	0	0	0
App Store	e9428edc-f897-4f4d-a3a4-37f586b6e00b	alsaabbs	6/22/23 22:42	التطبيق في الوقت الحالي جداً خيالي				en	sa	anb-arab-national-bank	The application is currently very fantastic.	und	application currently fantastic	Positive	App Store	0	0	0
App Store	784e9697-1467-4d02-a6fd-dd73723ca845	Gharshob	6/22/23 18:07	122				en	sa	anb-arab-national-bank	122	und		Neutral	App Store	0	0	0
App Store	ae56965f-c0cd-4b5c-8c2b-c1d84c3caa7f	Arwa0b	6/22/23 13:22	Arwa Bamanea				en	sa	anb-arab-national-bank	144	und		Neutral	App Store	0	0	0
App Store	d68e8602-7a6d-42a5-a098-e36a3a4603d5	عادل محمد عريشي	6/22/23 12:43	جداً سهل ورائع لكل الخدمات				en	sa	anb-arab-national-bank	Very easy and wonderful for all services.	und	easy wonderful service	Positive	App Store	0	0	0
App Store	d79cc558-5906-48b4-a4e0-b0d91e5dc4b2	فهد منقل	6/22/23 12:25	*244144				en	sa	anb-arab-national-bank	*244144	und		Neutral	App Store	0	0	0
App Store	c831ff34-0cfb-45e4-838c-0d7147c07eb9	Mohammed saad alali	6/22/23 12:01	تطبيق محترف *218127				en	sa	anb-arab-national-bank	A professional application	und	professional application	Neutral	App Store	1	0	0
App Store	d11a5ac2-b1e1-4147-8c58-048ed6ef5b81	Br 114-111	6/22/23 11:44	جميل وتطور في تطبيق لكن يحتاج الى بعض الإضافات				en	sa	anb-arab-national-bank	Beautiful and evolved application, but it needs some additions.	und	beautiful evolve application need additions	Positive	App Store	1	0	0
App Store	a0158c75-4f44-47b9-ad48-15aac0cde645	rakan2244	6/22/23 11:26	63608				en	sa	anb-arab-national-bank	102	und		Neutral	App Store	0	0	0
App Store	68224e6a-5128-4c4a-84c5-cb30f91e990f	64730	6/22/23 11:13	Shabab46730				en	sa	anb-arab-national-bank	103	und		Neutral	App Store	0	0	0
App Store	96d32318-97ae-4728-bedf-c1196048a11e	Ali wor	6/22/23 10:59	احترافيه بالصنع				en	sa	anb-arab-national-bank	Professional in making.	und	professional make	Positive	App Store	1	0	0
App Store	967ef34b-77dd-4c7d-8c04-5595c0a383cc	متعب الزهراني ٠٥٠٤	6/22/23 10:54	anb				en	sa	anb-arab-national-bank	*294235	und		Neutral	App Store	0	0	0
App Store	c3cbf599-127d-4744-9d06-8cd9f372f64d	faisal141582	6/22/23 10:53	478 -149				en	sa	anb-arab-national-bank	478 -149	und		Neutral	App Store	0	0	0
App Store	32c58604-81a8-49f4-ac6a-5b88b7103495	64193/107	6/22/23 10:53	64193				en	sa	anb-arab-national-bank	64193	und		Neutral	App Store	0	0	0
App Store	993ca99d-ebaf-4eff-846c-c78dde26ed7e	faisal800	6/22/23 10:53	تجربه المستخدم جميله				en	sa	anb-arab-national-bank	The user experience is beautiful.	und	user experience beautiful	Positive	App Store	0	0	0
App Store	30175e71-6e42-4246-9933-fd8000cf4398	Hussain.a.	7/11/23 22:00	Your bank in your hand				en	sa	anb-arab-national-bank	In line with Vision 2030 digital transformation anb *392211	en	line vision digital transformation anb	Neutral	App Store	1	0	0
App Store	fce64306-fe1c-4b7c-99af-d20d1d5f1885	Hmoudsj	7/11/23 13:52	64802				en	sa	anb-arab-national-bank	Frindly app and intuitive and easy navigate	en	frindly app intuitive easy navigate	Positive	App Store	1	0	0
App Store	25f3a554-2c6d-44ff-9206-d256386e027a	Ake 88	7/11/23 12:59	Abdulaziz Abdullah				en	sa	anb-arab-national-bank	Great app And to use it is beautiful All services that the customer needs are available with just a click of a button . ( 18919 )	en	great app use beautiful service customer need available click button	Positive	App Store	1	0	0
App Store	df932e17-7822-4e3b-abb7-cffe4e81f7bf	ٍْ	7/11/23 12:52	Always on the promise to keep pace with the digital transformation of banking services🔝🔝🔝				en	sa	anb-arab-national-bank	Always on the promise to keep pace with the digital transformation of banking servicesððð	en	always promise keep pace digital transformation bank service	Positive	App Store	1	0	0
App Store	9fdb1dc1-523a-4b80-a358-6b448c32a165	حميد ٧٧٧٨	7/11/23 12:45	An application that meets your needs, 62808 Muhammad Al-Tuwaijri				en	sa	anb-arab-national-bank	I Great development and good work in the new application, which meets the needs and desires of customers without the need to go to the branch ð	en	great development good work new application meet need desire customers without need go branch	Positive	App Store	1	0	0
App Store	c79f4010-5a33-401d-95f0-464f273ae0fa	sultanihuss	7/11/23 12:40	Nice app				en	sa	anb-arab-national-bank	Nice and much helpful and distinctiv that all customers like . Sultan *481122	en	nice much helpful distinctiv customers like sultan	Positive	App Store	0	0	0
App Store	13a9dafa-d7d4-4740-b2a9-557655a44ad2	Abdulaziz 2929	7/6/23 8:05	4207				en	sa	anb-arab-national-bank	4207	und		Neutral	App Store	0	0	0
App Store	28fa169d-3d86-4431-bc88-e1d8f5cd062d	801801 Islam	7/6/23 6:03	Great app 801801				en	sa	anb-arab-national-bank	Best app banking very easy and fast	en	best app bank easy fast	Positive	App Store	0	0	0
App Store	f1f0fb02-84d8-40ef-99d1-390e93c99575	Bubader001	7/5/23 11:58	Great App - 63506				en	sa	anb-arab-national-bank	friendly interface, The app is easy to navigate and provides users with quick access to all of the important information they need to manage their finances. The app also includes a number of helpful tools and features to monitor the accounts activities. Another great feature of the ANB app is its robust security measures. The app uses advanced encryption technology to protect user data, and users…	en	friendly interface app easy navigate provide users quick access important information need manage finance app also include number helpful tool feature monitor account activities another great feature anb app robust security measure app use advance encryption technology protect user data users also enable biometric authentication add security additionally users temporarily lock debit card misplace…	Positive	App Store	1	1	0
App Store	8ec7cd7a-7141-4c5f-9733-526fa9cc715f	Hani Bayounis	7/5/23 11:53	64082				en	sa	anb-arab-national-bank	Wonderful ð¹ð¹ð¹	en	wonderful	Positive	App Store	0	0	0
App Store	326cdc4f-2a12-4e98-a4d5-2fd035c8a65f	محمد علي علام	7/5/23 11:06	Amazing app 3709				en	sa	anb-arab-national-bank	1 highly recommend this banking app! . The app is extremely user-friendly and offers a wide range of features, including easy-to-use budgeting tools, real-time transaction tracking, and seamless payment options. Overall, I think this app is a game-changer for anyone looking to take control of their finances and simplify their banking experience.	en	highly recommend bank app app extremely userfriendly offer wide range feature include easytouse budget tool realtime transaction track seamless payment options overall think app gamechanger anyone look take control finance simplify bank experience	Positive	App Store	1	0	0
App Store	8a81af8d-3f58-4733-9a52-241f7f964ca4	Sharaf316	7/5/23 11:02	I like the new App				en	sa	anb-arab-national-bank	Much better than the old one. Ext: 7388 ID: 61588	en	much good old one ext id	Positive	App Store	1	1	0
App Store	837df821-98f5-400b-b27a-d918d56e9cc2	S5yaz	7/2/23 9:05	Awesome app Ext 8384				en	sa	anb-arab-national-bank	As I gave 10 out of 10 awesome app Frindly uses. Ext : 8384 Id ; 801714	en	give awesome app frindly use ext id	Positive	App Store	1	0	0
App Store	c8d1dc05-67f5-4b9e-9f5f-6923b158440e	Nasser Alyousif Ext: *093 222	7/2/23 6:09	Nasser Alyousif Ext : *093 - 222				en	sa	anb-arab-national-bank	The application is easy and also all financial matters are found on the first page. Only slow browsing	en	application easy also financial matter find first page slow browse	Positive	App Store	1	0	1
App Store	f46a811b-9b7c-4a7d-ac29-0f15a77355b4	Ali m ali	6/27/23 9:51	Premium banking app				en	sa	anb-arab-national-bank	Easy to use and it has professional features that will take from traditional banking to digital . *396222	en	easy use professional feature take traditional bank digital	Positive	App Store	1	0	0
App Store	e9d10639-a250-4190-86e3-9b626b9c92b0	Ma18917	6/26/23 6:34	New App				en	sa	anb-arab-national-bank	This new application is easy to use and contains great and useful features, as it is characterized by a modern and user-friendly design. Ext.18917	en	new application easy use contain great useful feature characterize modern userfriendly design ext	Positive	App Store	1	0	0
App Store	940b1fb8-31d8-4262-befb-febfa9ca5ea2	سوء خدمه	6/25/23 17:40	62892				en	sa	anb-arab-national-bank	A wonderful and distinctive application Ext: * 103103	en	wonderful distinctive application ext	Positive	App Store	0	0	0
App Store	758b8a89-2daa-4f9e-9e4b-2a0a322c6b4f	Ismail Mandili	6/23/23 16:12	Great app				en	sa	anb-arab-national-bank	Easy and helpful app Ext18168	en	easy helpful app ext	Positive	App Store	0	0	0
App Store	62cabe97-78f6-48fd-93fe-5f7c8c3f326e	WaleedAlsaud0	6/22/23 23:16	Thanks				en	sa	anb-arab-national-bank	It is very excellent and easy, and the protection in it is strong. Thank you to those who work on it. My name is Waleed I would like to participate in the contest , ID job : 61426 , Ext : *401111	en	excellent easy protection strong thank work name waleed would like participate contest id job ext	Positive	App Store	0	1	0
App Store	909c9850-05ff-4c72-a539-5c8ea060c13f	Abeer96F	6/22/23 17:53	A.ANB				en	sa	anb-arab-national-bank	Thanks	und	thank	Positive	App Store	0	0	0
App Store	8b12dfdf-5afd-4998-a8f1-a078f7d0517f	ksaaaaasa	6/22/23 12:26	WELL DONE ANB ⭐️⭐️⭐️⭐️⭐️				en	sa	anb-arab-national-bank	The best experience ever, Trust me it is worth it ð 60053	en	best experience ever trust worth	Positive	App Store	0	0	0
App Store	1b555777-cdfd-4c26-a8fe-1cc7c1db159e	Ahmed alyawar	6/22/23 12:04	Bank 64241				en	sa	anb-arab-national-bank	64241 ahmed alyawar 247 -111	mr	ahmed alyawar	Neutral	App Store	0	0	0
App Store	d01171d4-c0bc-46ed-b87e-53a434bb9fdb	nnaifghamdii	6/22/23 11:53	60879				en	sa	anb-arab-national-bank	*073101	und		Neutral	App Store	0	0	0
App Store	23b11846-e5f9-4c2c-a2b9-0a90b304ed43	hash0088	6/22/23 11:53	61337				en	sa	anb-arab-national-bank	61337	und		Neutral	App Store	0	0	0
App Store	c5ee4c14-9035-4b25-b66d-b8678ade8bdf	LSM_94	6/22/23 11:51	1536				en	sa	anb-arab-national-bank	1536	und		Neutral	App Store	0	0	0
App Store	eaafa61b-fd43-48e4-887b-2f1ad8cbe7f9	Shouqk	6/22/23 11:46	Great app				en	sa	anb-arab-national-bank	One of the greatest banks in riyadh with a great and easy to use app ð 64934	en	one great bank riyadh great easy use app	Positive	App Store	0	0	0
App Store	e004c2c4-1bfc-4f7f-843e-986962b4d6e9	60877	6/22/23 11:38	60877				en	sa	anb-arab-national-bank	This app has resilient services and customers can utilize it easily. Enjoy with ANB services	en	app resilient service customers utilize easily enjoy anb service	Positive	App Store	0	0	0
App Store	93c2f3d3-2245-4233-9105-957cb6afbaaf	Mustafa Al-Qara	6/22/23 11:34	Great app				en	sa	anb-arab-national-bank	Ext: *3006522	en	ext	Neutral	App Store	0	1	0
App Store	664e6cd4-4f29-40c1-a7e4-835567a9e220	Aljohara alshammri	6/22/23 11:28	64757 - 101				en	sa	anb-arab-national-bank	101	und		Neutral	App Store	0	0	0
App Store	9a72c2b8-1c4a-4b6a-b57c-6e23688d6628	Abdulaziz 134-111	6/22/23 11:19	New App				en	sa	anb-arab-national-bank	I want thank all who work in this App. Easy transactions, secure,what i shall say.. no words can explain what i feel towards ANB bank, Will all success and may u achieve all your goals. 134/111	en	want thank work app easy transactions securewhat shall say word explain feel towards anb bank success may u achieve goals	Positive	App Store	1	0	0
App Store	b06440fa-a9f8-403f-ba65-1ca4aff23cee	Rakan aldrihem	6/22/23 11:10	Best app				en	sa	anb-arab-national-bank	Thanks for this good app 63052	en	thank good app	Positive	App Store	0	0	0
App Store	7186619f-3b80-41bc-b260-235f812c2cee	ibra3399	6/22/23 10:55	8918				en	sa	anb-arab-national-bank	8918	und		Neutral	App Store	0	0	0
App Store	c493dfae-050a-4266-beff-bd539ea49ca7	Steel have internet problems	7/9/23 5:25	Fast and easy access				en	us	anb-arab-national-bank	Fast and easy access for bank services , what a great transformation smoother than the previous version.	en	fast easy access bank service great transformation smooth previous version	Positive	App Store	0	0	0
App Store	b1a60e56-5a79-4058-934a-397cd5067039	Rafah🐢	7/13/23 13:50	Great job on the new Revamp🚀				en	us	anb-arab-national-bank	Dears, the revamp is so and extremely impressive! I would like to thank all the teams who have worked on this project!ðð»	en	dears revamp extremely impressive would like thank team work project	Positive	App Store	0	0	0
App Store	82706a87-029d-48f8-8c40-44581156d1f1	Nawaf552155555	7/5/23 11:03	Way Smoother and better experience!				en	us	anb-arab-national-bank	What a great revamp, the user experience is better and smoother than ever, what a great enhancements!	en	great revamp user experience good smooth ever great enhancements	Positive	App Store	0	0	0
App Store	8f60b8fa-db6f-449f-a658-1eec8763780c	HussainAhmad1982	7/18/23 8:03	The revamped design of the app is impressive.				en	us	anb-arab-national-bank	Great design with ease of use and wonderful graphics.	en	great design ease use wonderful graphics	Positive	App Store	0	0	0
App Store	a3212d37-8c93-4a6a-9843-b846c294e610	Mahd00	7/11/23 13:15	Fast and easy access				en	us	anb-arab-national-bank	Very beneficial app	en	beneficial app	Positive	App Store	1	0	0
App Store	fc8d476f-0cdd-4b4c-84bf-b196e6eb88ea	Hussain ali altaha	7/6/23 8:52	Perfect app				en	us	anb-arab-national-bank	Incredible upgrade to the older version that meets ANB new vision and identity. 5 stars deserved.	en	incredible upgrade old version meet anb new vision identity star deserve	Positive	App Store	0	0	0
App Store	04903157-f92f-4f12-82ae-549673248e47	LulwaB	7/5/23 12:15	anb application				en	us	anb-arab-national-bank	Clean and directs you easily to the items. 2759	en	clean direct easily items	Neutral	App Store	0	0	0
App Store	e197aec7-c506-4d28-a521-c373277d05a1	Marwan b	7/5/23 10:56	Mr				en	us	anb-arab-national-bank	Great and big changes from old one Impressive ð	en	great big change old one impressive	Positive	App Store	0	0	0
App Store	a77f852c-9f66-4c87-bfd4-21cc747bd184	abdulazizin	7/5/23 12:18	Excellent App				en	us	anb-arab-national-bank	Bank with anb for a seamless experience & smooth customer journeys ðð¼	en	bank anb seamless experience smooth customer journey	Positive	App Store	0	0	0
App Store	25f05c31-3681-40e2-9854-8b6d432f1abb	Safi S	6/23/23 21:13	Lovely app				en	us	anb-arab-national-bank	Excellent, organized and user friendly Loved it 4406	en	excellent organize user friendly love	Positive	App Store	0	0	0
App Store	5b9b830a-5359-4245-850b-9afc2ecfe503	Bander m z	6/22/23 12:00	Well done				en	us	anb-arab-national-bank	Best app from all other banks apps 1260	en	best app bank apps	Positive	App Store	0	0	0
App Store	0d0cb940-a2f2-4c20-a249-b0571cda10de	abdullah al anazi 000	7/11/23 12:50	Anb mobile				en	us	anb-arab-national-bank	Anb mobile is the best app bank	en	anb mobile best app bank	Positive	App Store	0	0	0
App Store	d2e4c12e-4b27-41b4-89f7-b9172e761276	meshalblek	7/12/23 8:29	Great app				en	us	anb-arab-national-bank	Great app with a new design	en	great app new design	Positive	App Store	0	0	0
App Store	33c7344b-1a01-4713-9c9c-026bd3e37158	Maramalharbi4	7/5/23 11:12	7286				en	us	anb-arab-national-bank	The best bank in the world ð	en	best bank world	Positive	App Store	0	0	0
App Store	ecee15eb-a59b-4432-9dba-0bf8c68e1c99	hun666ter	6/22/23 11:10	The best app				en	us	anb-arab-national-bank	Good experience All services I need Live design Great overall 3596	en	good experience service need live design great overall	Positive	App Store	0	0	0
App Store	983034d9-bece-4e2a-b0a0-9bda47b13b02	hessa enazi	6/22/23 11:11	anb bank 💙				en	us	anb-arab-national-bank	The best bank ever ðððð hessa My Ex :8202	en	best bank ever hessa ex	Positive	App Store	0	0	0
App Store	7cd8c14e-de60-46fb-a518-81c86dbcd90d	Shaveeez	7/9/23 7:06	ANB App				en	us	anb-arab-national-bank	Excellent modern App	en	excellent modern app	Positive	App Store	0	0	0
App Store	910907f5-55fc-4b0a-a8dd-410a56f1703f	Abdulhadi.	7/5/23 11:01	Abdulhadi				en	us	anb-arab-national-bank	Naic tapp	en	naic tapp	Neutral	App Store	0	0	0
App Store	1be39cde-cb9c-48a0-8a2b-7a6831fab9cf	Moh.na777	7/18/23 17:57	انصح الجميع				en	us	anb-arab-national-bank	The application is excellent and suitable for all age groups, honestly.	ar	application excellent suitable age group honestly	Positive	App Store	1	0	0
App Store	3e4c3f0f-79d4-4e5f-a9ff-0c578b133472	iAbdulrahmn	7/13/23 10:17	افضل واسهل تطبيق بنوك استخدمته				en	us	anb-arab-national-bank	The best and easiest banking application I have used.	ar	best easy bank application use	Positive	App Store	0	0	0
App Store	e2221613-7d74-4bd8-ac73-169e4df16bc2	Ibtisam aldahmashi	7/13/23 7:11	ANB my choice				en	us	anb-arab-national-bank	Easy + fast + smart + the ability to provide permissions that serve the required operations + no hanging problems.. Thank you ANB Smiling	ar	easy fast smart ability provide permissions serve require operations hang problems thank anb smile	Positive	App Store	0	1	1
App Store	4f7b853f-97b5-4654-b2b9-990061274d12	N_jood	7/11/23 13:05	البنك العربي				en	us	anb-arab-national-bank	"An excellent application from one of the best banks."	ar	excellent application one best bank	Positive	App Store	0	0	0
App Store	13c02c73-363e-4c8e-a34a-48b6cbd31524	Asdf102030j	7/11/23 12:46	متميزون في التطوير				en	us	anb-arab-national-bank	Wishing you success.	ar	wish success	Positive	App Store	1	0	0
App Store	53c779d6-5b13-48a3-9b7c-59eafc83b4e4	*330111	7/11/23 12:39	55853				en	us	anb-arab-national-bank	The application is easy to use.	ar	application easy use	Positive	App Store	0	0	0
App Store	a42ce1bb-14ba-4571-8a18-4402644f1cc6	ssaaase	7/11/23 12:41	***** slaman				en	us	anb-arab-national-bank	A beautiful application that provides all services for the customers. It allows the customer to carry out their daily transactions.	ar	beautiful application provide service customers allow customer carry daily transactions	Positive	App Store	1	1	0
App Store	ad0ba3f4-3365-417b-bc1d-81438bb16219	saleh alshami	7/11/23 12:36	صالح الشامي				en	us	anb-arab-national-bank	Great development in the application and excellent.	ar	great development application excellent	Positive	App Store	0	0	0
App Store	95e8bc6e-31ac-459b-949e-860e81cedab5	حياة ان للاجنحة الفندقية	7/6/23 13:13	رائع				en	us	anb-arab-national-bank	Easy, wonderful, and coherent. Thank you. And the work deserves praise. Mohammed.	ar	easy wonderful coherent thank work deserve praise mohammed	Positive	App Store	0	0	0
App Store	c3c9df43-5577-428d-8786-55c6eba2cc25	سلمان احمد الاحمد	7/6/23 12:04	تقييم التطبيق 10/10				en	us	anb-arab-national-bank	Easy-to-use application, all services are available. Thank you for the idea.	ar	easytouse application service available thank idea	Positive	App Store	0	0	0
App Store	0c928008-da3d-4a0d-a69f-5222718b79ba	Ahmed Bin masad	7/6/23 5:53	Ahmed				en	us	anb-arab-national-bank	The new application is better and easier than the previous application ID93734.	ar	new application good easy previous application id	Positive	App Store	1	0	0
App Store	eda57ae8-b7a8-4f2c-9a1c-e36b0c7b4df3	Abdullah m s alqahtani	7/5/23 11:59	Abdullah alqahtani				en	us	anb-arab-national-bank	A beautiful and coordinated application with all banking services. Thank you, Arab Bank.	ar	beautiful coordinate application bank service thank arab bank	Positive	App Store	0	0	0
App Store	9f2e7be4-c8fa-44d6-a840-e0b2e422a150	توغو	7/5/23 11:48	تقيم				en	us	anb-arab-national-bank	Marvelous	ar	marvelous	Neutral	App Store	0	0	0
App Store	085536bd-7923-425c-a83a-5aa1404e2a5d	AHMED M ALAMRI	7/5/23 11:32	ممتاز جدا				en	us	anb-arab-national-bank	An excellent application, and thanks to those responsible for its achievement. Ahmed Al-Omari / 62397	ar	excellent application thank responsible achievement ahmed alomari	Positive	App Store	0	0	0
App Store	8f7c5c07-3a13-4975-a836-3e2d7fd42c4b	أبو محمد 705	7/5/23 11:06	تطبيق البنك العربي				en	us	anb-arab-national-bank	One of the easiest and fastest banking applications	ar	one easy fast bank applications	Positive	App Store	0	0	0
App Store	fcfbd05d-a3bd-437e-a667-611c512245a1	Abo alsoom	7/5/23 11:06	تطبيق عصري				en	us	anb-arab-national-bank	An easy-to-use application that keeps up with electronic developments and has clear options that meet the customer's needs. ðð»	ar	easytouse application keep electronic developments clear options meet customers need	Positive	App Store	0	0	0
App Store	f0b42485-0660-4836-8bbb-223caa0724e9	Mohammed abohade	7/5/23 11:01	تطبيق جميل ومتطور				en	us	anb-arab-national-bank	Excellent	ar	excellent	Positive	App Store	0	0	0
App Store	ff7675d2-7dc9-46c1-bb2e-acb6917383fb	Welcom111	7/5/23 10:56	تطبيق سهل جداً				en	us	anb-arab-national-bank	Easy to use, with fast and very clear transactions, it is considered one of the best banking applications, very easy to use.	ar	easy use fast clear transactions consider one best bank applications easy use	Positive	App Store	0	0	0
App Store	a8e247fc-0f9b-4288-993d-507f0f3516bb	الكودي	7/5/23 10:56	تطبيق anb				en	us	anb-arab-national-bank	Great and flexible application.	ar	great flexible application	Positive	App Store	1	0	0
App Store	c3a7fc92-9897-44d2-b940-ab2e8bfdafe2	fakersat	7/2/23 9:16	تقييم				en	us	anb-arab-national-bank	Excellent and wonderful application. Job number 53317.	ar	excellent wonderful application job number	Positive	App Store	0	0	0
App Store	801f1d3c-de2a-40fa-9490-23b693a56246	Abdulaziz Alayed	7/2/23 5:23	Easier App.				en	us	anb-arab-national-bank	A better experience and always forward. ANB with no Limits. Bravo. Extension number: 3104 Abdulaziz Alayed	ar	good experience always forward anb limit bravo extension number abdulaziz alayed	Positive	App Store	0	0	0
App Store	384e726c-7c78-4a93-840a-4048c31e6522	عبدالله مرعي 82	6/25/23 16:38	18576				en	us	anb-arab-national-bank	"A beautiful and easy-to-use application."	ar	beautiful easytouse application	Positive	App Store	0	0	0
App Store	1705c33a-73ef-4ebc-b402-e7640021dce0	abu fiasel	6/25/23 15:57	تطبيق البنك العربي				en	us	anb-arab-national-bank	The Arab Bank application is constantly evolving to keep up with the changes that suit the customers' needs. InshaAllah, it will become the number one among banking applications.	ar	arab bank application constantly evolve keep change suit customers need inshaallah become number one among bank applications	Positive	App Store	1	0	0
App Store	a09b34a6-a480-4e73-9e97-84f2c812f4fb	Ahmad Alhawas	6/25/23 15:08	Ahmad				en	us	anb-arab-national-bank	Excellent change and a better experience and ease of use 63294	ar	excellent change good experience ease use	Positive	App Store	0	0	0
App Store	ae4ade6c-c1d4-4899-b75f-2f62a205fc2f	Hajar TM	6/22/23 19:03	عائلتي الثانيه				en	us	anb-arab-national-bank	As we have known you for your passion, development, and continuity in giving, as well as your ease and clarity. 7264.	ar	know passion development continuity give well ease clarity	Positive	App Store	1	0	0
App Store	382b4171-85f8-4404-8bc2-c3d78970175c	Abdulaziz 100	6/25/23 15:06	58341-100				en	us	anb-arab-national-bank	A very beautiful and wonderful application with excellent additions.	ar	beautiful wonderful application excellent additions	Positive	App Store	0	0	0
App Store	30157177-8aec-4d60-a0fc-e120cbb63344	EX: 4155	6/22/23 12:12	تطبيق مميز				en	us	anb-arab-national-bank	The Arabic application has become more than amazing.	ar	arabic application become amaze	Positive	App Store	1	0	0
App Store	96fd35a5-f65c-4d09-b59f-f02aca31feb7	Bishoo777	6/22/23 11:10	برنامج مبدع				en	us	anb-arab-national-bank	A developed and easy-to-use program Extension number 18516	ar	develop easytouse program extension number	Neutral	App Store	0	1	0
App Store	863665c1-bd61-4bbb-8108-9c56cd574eb1	wedtamimi	6/22/23 11:06	رقم التحويلة : 2144				en	us	anb-arab-national-bank	Renewable	ar	renewable	Neutral	App Store	0	0	0
App Store	fcdbec8a-4a96-4355-aefc-06a12d1e3a36	6128 - 64313	6/22/23 11:05	6128 - 64713				en	us	anb-arab-national-bank	Excellent app and we look forward to improvements.	ar	excellent app look forward improvements	Positive	App Store	0	0	0
App Store	14323842-0270-4ac9-b25b-d79d49577f0e	Ali Aljedi	6/22/23 11:05	7316				en	us	anb-arab-national-bank	An amazing application deserves a thousand stars.	ar	amaze application deserve thousand star	Positive	App Store	0	0	0
App Store	aaddc12e-d09c-44ff-9e5a-608c447447fb	محمد الحربي 61184	6/22/23 11:05	الرس 122				en	us	anb-arab-national-bank	100 tranfer	ar	tranfer	Neutral	App Store	0	0	0
App Store	0af78aa5-7e58-4d86-b0e4-0a302da8a4f8	نايف anb	6/22/23 11:01	برنامج سهل و مريح				en	us	anb-arab-national-bank	With the recent development in Arab National Bank, this is one of the best and easiest programs now.ðð» 18639	ar	recent development arab national bank one best easy program	Positive	App Store	0	0	0
App Store	2e393c21-8654-4bb8-b78e-3a027db62e44	جميل جدا و شكرا لكم	6/22/23 10:53	الرياض				en	us	anb-arab-national-bank	The application is beautiful.	ar	application beautiful	Positive	App Store	0	0	0
App Store	537c650e-976c-433e-aaff-37b400975302	Abdulaziz84s	6/22/23 10:52	تطبيق رائع				en	us	anb-arab-national-bank	The application was tested and it's great. Extension 2721.	ar	application test great extension	Positive	App Store	1	0	0
App Store	6cc90f6d-eb6b-40e0-92dc-20a263a1e256	حــــالي الـذوق	6/22/23 15:24	تقييم				en	us	anb-arab-national-bank	*390210	und		Neutral	App Store	0	0	0
App Store	2c2b7906-bb9d-423c-9354-02daae11c9ff	-6821	6/22/23 11:37	6821				en	us	anb-arab-national-bank	6821	und		Neutral	App Store	0	0	0
App Store	b30729da-d0d7-4023-aaf5-5833ac8cca7b	Osamaa888	6/22/23 11:05	2439				en	us	anb-arab-national-bank	2429	und		Neutral	App Store	0	0	0
App Store	364e280e-1875-4f84-a8f0-b8cb3c9e14ff	hehehsvdhevs	7/12/23 11:17	Competition 63781				en	us	anb-arab-national-bank	Wonderful App 63781 Hail A Alotaibi	en	wonderful app hail alotaibi	Positive	App Store	0	0	0
App Store	c347fbc5-d08e-4816-8907-8895df7a66ad	Fhd i	7/11/23 12:48	Perfect app				en	us	anb-arab-national-bank	Incredible upgrade and easy accessibility of the components helps achieve ANB's vision 61157	en	incredible upgrade easy accessibility components help achieve anbs vision	Positive	App Store	0	0	0
App Store	2ac36907-e7ed-46ba-8e5a-daa5f5bd1e64	Fair4004	7/5/23 13:38	54031				en	us	anb-arab-national-bank	*370107	und		Neutral	App Store	0	0	0
App Store	331daab3-8441-4548-9a13-49d1c87e1b7b	Abdulelah bin Mohammad	7/5/23 11:38	Great job				en	us	anb-arab-national-bank	The ANB mobile app is getting more easier and more luxury interface than before . I like it ðð¼ Thanks ð 58055 ABDULELAH ALDAWOOD	en	anb mobile app get easy luxury interface like thank abdulelah aldawood	Positive	App Store	0	0	0
App Store	a1fbe06f-d1c4-4c08-b93b-5e3684067b60	Alanoudb	6/22/23 13:58	ANB new app so smooth and developed with high quality features. 64012				en	us	anb-arab-national-bank	Finally we got ANB new app ð so smooth and developed with high quality features. 64012	en	finally get anb new app smooth develop high quality feature	Positive	App Store	0	0	0
App Store	77453006-9943-4c56-9142-94192d898164	Uh jinn	3/28/22 10:24	Why???				en	au	anb-arab-national-bank	Why this app is always stops working!!!	en	app always stop work	Negative	App Store	0	1	0
App Store	9537b4a3-4d49-419d-9553-b41d1d133a56	anbvvvvcfghhh	10/8/22 4:38	New logo	{'id': 32861585, 'body': 'Dear customer\n\nThank you for writing to us. In order to help you solve the problem. Please contact us via e-mail at: ebank@anb.com.sa\nOr call anb Phone Banking and select account services (Option1) then select internet services (Option 5)\n\nLocal: 8001244040\n\nAbroad: +966 11 212 7555\n\nSincerely\nanb net and Mobile banking Support Team', 'modified': '2022-10-30T08…			en	in	anb-arab-national-bank	New logo and app looks good. But updating personal information not working. Error message after otp.	en	new logo app look good update personal information work error message otp	Neutral	App Store	1	1	0
App Store	9928be32-73cf-48fa-9d24-6f904987ffa1	Aziz Bashir	11/12/22 4:18	Stuck at the login				en	my	anb-arab-national-bank	Previously, it work even the apps is slow. But today the apps does not work at all. Keep stuck at the log in page. Fix this asap	en	previously work even apps slow today apps work keep stick log page fix asap	Negative	App Store	0	1	1
App Store	bc49c3f6-ba25-477e-9e81-59f54bc43c38	waleed A0	3/27/22 18:08	Aw				en	om	anb-arab-national-bank	Does it open in the Sultanate of Oman?	ar	open sultanate oman	Neutral	App Store	0	1	0
App Store	31803a01-420a-4f4c-95aa-901b51478d97	She is shining	10/19/22 11:13	Some features	{'id': 32861577, 'body': 'Dear Customer,\nBeneficiaries list can be edited by swiping from right to left, then a new options to edit the beneficiary will appear.\nSincerely\nanb net and Mobile banking Support Team\n', 'modified': '2022-10-30T08:46:25Z'}			en	sa	anb-arab-national-bank	Overall is good . Unfortunately, the beneficiaries list can't be edited and the names can not be modified through the App. We need to go back to the web brows for such task. I would like to recommend this suggestion for upcoming update.	en	overall good unfortunately beneficiaries list cant edit name modify app need go back web brows task would like recommend suggestion upcoming update	Neutral	App Store	1	1	0
App Store	df9bf928-3899-4b91-bd52-d16511a0fac5	usman.6363	11/15/22 1:40	Not open in abroad				en	sa	anb-arab-national-bank	The old version of ANB was much better than this This version cannot open in abroad Like in Pakistan Please fix this problem	en	old version anb much good version open abroad like pakistan please fix problem	Negative	App Store	0	1	0
App Store	158bedda-f03b-4c59-912b-7d99408e9763	sohel andnang	12/29/22 11:39	Need to bug fixed				en	sa	anb-arab-national-bank	Some times its crash need to upgrade this software	en	time crash need upgrade software	Negative	App Store	1	1	1
App Store	c1f9325f-d184-4730-88fe-ee0a7404cda5	Omar2022$	11/23/22 12:52	Not active	{'id': 33385212, 'body': 'Dear Omar ✋\nWhen there is a problem with anb\nPlease contact us via the number:\n8001244040\nHave a good day💙', 'modified': '2022-11-27T09:31:28Z'}			en	sa	anb-arab-national-bank	I been trying to login more then 2 months .. when I got the call and chose number one the system says there is a mistake , tray again ð¡	en	try login months get call choose number one system say mistake tray	Negative	App Store	0	1	0
App Store	2a94a1ef-4f9c-4e05-b322-37453666da8f	Deluwarsk	11/19/22 2:57	ANB				en	sa	anb-arab-national-bank	This is app not working my device	en	app work device	Negative	App Store	0	1	0
App Store	6c619973-ac55-486b-a11d-ce53befbdade	STARKKKK1	3/11/22 1:51	So bad to enter your account				en	sa	anb-arab-national-bank	Its say you have to Connect to network but i am already connected! That bad really bad And face id not working Please fix this app make it easy !!	en	say connect network already connect bad really bad face id work please fix app make easy	Negative	App Store	1	1	0
App Store	280758d2-efc6-4622-a738-ce7c548661cd	osMAN ZAG	1/1/22 7:30	So bad				en	sa	anb-arab-national-bank	Connection is always very slow and not working a lot of time This bank and APP complicated, not easy to use	en	connection always slow work lot time bank app complicate easy use	Negative	App Store	1	1	1
App Store	67ef7c0b-211f-4fb6-9df9-216072032761	shah sultan	6/3/22 9:59	MPIN feature na	{'id': 32860940, 'body': 'Dear customer,\n\nThank you for writing to us. MPIN feature is working fine. \nIn order to help you solve the problem. Please contact us via e-mail at: ebank@anb.com.sa\nOr call ANB Phone Banking and select account services (Option1) then select internet services (Option 5)\n\nLocal: 8001244040\n\nAbroad: +966 11 212 7555\n\nSincerely\nANB Net and Mobile banking Support …			en	sa	anb-arab-national-bank	With new update MPIN feature doeant work with me, check to fix..	en	new update mpin feature doeant work check fix	Negative	App Store	0	1	0
App Store	6e8062d0-6cb4-4e98-beac-2cc342677040	Aalhokail	8/19/22 16:38	Not for E- Business				en	sa	anb-arab-national-bank	Keep receiving SMS to use the app while not designed for Business or no instructions provided	en	keep receive sms use app design business instructions provide	Negative	App Store	0	1	0
App Store	66c2da93-8b87-4b1e-9c52-c4682fdc5b5a	m.kiswany	10/25/22 19:26	Not working over iPhone	{'id': 32861285, 'body': 'Dear customer,\n\nThank you for writing to us. In order to help you solve the problem. Please contact us via e-mail at: ebank@anb.com.sa\nOr call anb Phone Banking and select account services (Option1) then select internet services (Option 5)\n\nLocal: 8001244040\n\nAbroad: +966 11 212 7555\n\nSincerely\nanb net and Mobile banking Support Team', 'modified': '2022-10-30T0…			en	sa	anb-arab-national-bank	Keep giving errors over iOS 16	en	keep give errors ios	Negative	App Store	0	1	0
App Store	72d0d6b4-9ce0-495c-b7f1-1f7c7ec7939a	dfgjjvcx	12/11/22 19:27	Verification				en	sa	anb-arab-national-bank	The new application requests my account 16 number and my ATM passcode number ?? Is this secure ?	en	new application request account number atm passcode number secure	Neutral	App Store	0	1	0
App Store	27be81f8-f48d-42b6-ba9d-00aca1eb9d84	reyam١٥٥٥	4/27/22 17:10	Review				en	sa	anb-arab-national-bank	Not working cant pay bills	en	work cant pay bill	Negative	App Store	0	1	0
App Store	785a1c78-a36d-4eb7-b5e5-21e6cc067b4d	لددداددر	7/27/22 11:54	Problem				en	sa	anb-arab-national-bank	App dose not work for almost a day	en	app dose work almost day	Negative	App Store	0	1	0
App Store	f79bc753-435a-42c3-86c8-ea0aa005350d	Isosi.91	3/1/22 9:08	Terrible				en	sa	anb-arab-national-bank	The worst application i have ever used	en	bad application ever use	Negative	App Store	1	0	0
App Store	c57695e0-c5ee-49f2-9a11-b4c7b4f538ad	تربيت على صوت باسم	7/7/22 21:28	The app doesn't support capital letters				en	sa	anb-arab-national-bank	The app doesn't support capital letters	en	app doesnt support capital letter	Negative	App Store	1	1	0
App Store	b1b96fd4-6224-422b-9182-4befc3bad8e3	Jaber_h	10/27/22 0:10	Thanx	{'id': 32861471, 'body': 'Dear customer\n\nThank you for rating us, we always look forward to providing the best to our valuable customers\nSincerely\nanb net and Mobile banking Support Team', 'modified': '2022-10-30T08:34:31Z'}			en	sa	anb-arab-national-bank	Thanx	en	thanx	Positive	App Store	0	0	0
App Store	a7c8e94c-0a6c-481a-9da1-9f44284b460b	shaimaaa198372	7/27/22 4:04	Error				en	sa	anb-arab-national-bank	Error no 503 ?! Hat is that	en	error hat	Negative	App Store	0	1	0
App Store	3a90631e-8e58-4273-8b8e-de1d9868dded	mohameed aljalhami	6/9/22 21:58	it's so bad it's not work !!!				en	sa	anb-arab-national-bank	so bad it's not work	en	bad work	Negative	App Store	1	1	0
App Store	d72a4504-cb8e-4ba7-8063-b58b5a5817ca	Almuaid	9/11/22 0:28	عدم الاستجابة لشكوى العميل	{'id': 32300263, 'body': 'عميلنا العزيز\n\nشكرا لتعاملك مع البنك العربي الوطني،\n\nلمساعدتك على حل المشكلة التي تواجهك، الرجاء الاتصال على هاتف العربي، خدمات الحسابات ومن ثم الضغط على خيار رقم 5 خدمات العربي نت والعربي موبايل.\n\nمن داخل المملكة / 8001244040\n\nمن خارج المملكة / 966112127555+\n\nمع تحيات فريق دعم العربي نت والعربي موبايل\n', 'modified': '2022-09-29T12:02:43Z'}			en	sa	anb-arab-national-bank	I have a malfunctioning emergency cash service, and I have filed a complaint for two months, but it has not been resolved, and there has been no communication with me. If I do not find a response, I will request to transfer my salary.	ar	malfunction emergency cash service file complaint two months resolve communication find response request transfer salary	Negative	App Store	0	1	0
App Store	a3b435c0-e336-47e6-bc18-d8f847ab0e3a	ابو البراااق	2/10/22 16:50	التحديث				en	sa	anb-arab-national-bank	"May Allah ruin the hands of those who did it."	ar	may allah ruin hand	Negative	App Store	1	0	0
App Store	aa12cb74-5668-4b3b-a006-f5540362e3d8	الفرقد الدولي	12/12/22 12:44	اسهل واامن تطبيق على مستوى بنوك العالم	{'id': 26873647, 'body': 'عميلنا العزيز شكرا لثقتك وتعاملك مع البنك العربي الوطني، نتطلع دائماً الى تقديم الافضل لكم \nمع تحيات فريق دعم العربي نت والعربي موبايل\n', 'modified': '2021-12-16T12:39:23Z'}			en	sa	anb-arab-national-bank	The easiest and safest application at the level of world banks.	ar	easy safe application level world bank	Positive	App Store	0	0	0
App Store	d56ea995-b66b-4eb0-96b3-49ab0edf33f7	abodasb	12/26/22 3:33	تطبيق فيه اخطاء				en	sa	anb-arab-national-bank	The login process cannot be executed.	ar	login process execute	Negative	App Store	0	1	0
App Store	3ed0c53b-b954-4c3f-a2db-4418224a17c4	سيدو٢١	12/20/22 11:09	ملاحظات هامة				en	sa	anb-arab-national-bank	The Arab Bank has many banking features, but my observations here will be about the application based on my experience as a new customer. 1- The transfer icon is not activated, meaning I cannot use transfers or add beneficiaries from within the application. 2- I added a bill for payment, but when I wanted to add a new bill, I cannot access the add icon at all, despite multiple attempts, until I d…	ar	arab bank many bank feature observations application base experience new customer transfer icon activate mean use transfer add beneficiaries within application add bill payment want add new bill access add icon despite multiple attempt delete exist bill add screen appear directly apple wallet add try add bill salam mobile account accept even though add bank applications thank	Neutral	App Store	1	1	0
App Store	8f34309f-b9f4-4fd4-b2e2-ce2ae32cc4da	علي الأسمري	12/6/22 12:31	Best App anb				en	sa	anb-arab-national-bank	My favorite bank, ANB, is an excellent application that deserves five stars. It offers features that meet the customer's needs for sophisticated banking services. Thank you.	ar	favorite bank anb excellent application deserve five star offer feature meet customers need sophisticate bank service thank	Positive	App Store	0	0	0
App Store	ca5fa81c-3b9d-497c-8f4d-83496c05f62a	عليآء🌹	10/13/22 13:31	تبارك الله⭐️⭐️⭐️⭐️⭐️	{'id': 32861483, 'body': 'عميلنا العزيز شكرا لثقتك وتعاملك مع anb، نتطلع دائماً الى تقديم الافضل لكم \nمع تحيات فريق دعم العربي نت والعربي موبايل', 'modified': '2022-10-30T08:36:30Z'}			en	sa	anb-arab-national-bank	"I ask Allah for you to be successful in the finest of services, everything is wonderful, and may you always progress for the better. ð¤²ð¼ð¤"	ar	ask allah successful fine service everything wonderful may always progress good	Positive	App Store	1	0	0
App Store	10e481b7-27b7-477a-98b7-b8294f349084	YAHIA MADKHALY	12/1/22 10:10	التطبيق				en	sa	anb-arab-national-bank	The application needs a visit from technical support!	ar	application need visit technical support	Neutral	App Store	1	0	0
App Store	20694889-5deb-489c-aeda-f58932679fc7	Modi.1	11/25/22 22:33	سيئ				en	sa	anb-arab-national-bank	Unfortunately, customer service treatment is unsatisfactory for me. The application is lacking many features and tools. Thank you.	ar	unfortunately customer service treatment unsatisfactory application lack many feature tool thank	Negative	App Store	1	0	0
App Store	df4f236d-2875-4974-8208-f76040bb1b57	ibrahim .a.e	11/23/22 14:42	رفض دخول	{'id': 33385103, 'body': 'مرحبا \nيرجى تحديث الجهاز المحمول لأخر نسخة مصدرة .\nفي حال استمرار المشكلة يرجى التواصل معنا عبر \n8001244040\nيومك جميل .', 'modified': '2022-11-27T09:15:27Z'}			en	sa	anb-arab-national-bank	The application rejects access to iPhone 7.	ar	application reject access iphone	Negative	App Store	0	1	0
App Store	ce5da2a8-6c92-40e5-be72-412302663548	jood3434	11/2/22 9:39	استفسار سريع	{'id': 32994577, 'body': 'عميلنا العزيز\n\nشكرا لتعاملك مع البنك العربي الوطني،\n\nلمساعدتك على حل المشكلة التي تواجهك، الرجاء الاتصال على هاتف العربي، خدمات الحسابات ومن ثم الضغط على خيار رقم 5 خدمات العربي نت والعربي موبايل.\n\nمن داخل المملكة / 8001244040\n\nمن خارج المملكة / 966112127555+\n\nمع تحيات فريق دعم العربي نت والعربي موبايل\n', 'modified': '2022-11-06T09:38:33Z'}			en	sa	anb-arab-national-bank	Regarding the Arab Bank mobile application, it is complicated in the new update as it does not open after entering the username and password, whether for quick login or regular login. What is the solution? Please respond.	ar	regard arab bank mobile application complicate new update open enter username password whether quick login regular login solution please respond	Negative	App Store	1	1	0
App Store	e3883b26-998f-4fe8-b969-813b662d6839	abo 3alll fadl	11/1/22 10:32	تطبيق ممل بالعامية مخيس	{'id': 32944091, 'body': 'عميلنا العزيز\n\nشكرا لتعاملك مع البنك العربي الوطني،\n\nلمساعدتك على حل المشكلة التي تواجهك، الرجاء الاتصال على هاتف العربي، خدمات الحسابات ومن ثم الضغط على خيار رقم 5 خدمات العربي نت والعربي موبايل.\n\nمن داخل المملكة / 8001244040\n\nمن خارج المملكة / 966112127555+\n\nمع تحيات فريق دعم العربي نت والعربي موبايل', 'modified': '2022-11-03T06:11:06Z'}			en	sa	anb-arab-national-bank	The confirmation message is delayed, suddenly the login information is deleted, and it asks for re-registration as if you forgot the password.	ar	confirmation message delay suddenly login information delete ask reregistration forget password	Negative	App Store	0	0	1
App Store	3397bfc4-6ef2-4eac-935b-8c1d4bd5e6c5	ابو عابد الرحمن	10/27/22 9:50	لا تعليق	{'id': 32861275, 'body': 'عميلنا العزيز شكرا لتعاملك مع anb، نتطلع دائماً الى تقديم الافضل لكم، الرجاء تزويدنا بملاحظاتك على التطبيق عبر البريد الالكتروني: ebank@anb.com.sa وللمساعدة ارجوا الاتصال على هاتف العربي، خدمات الحسابات ومن ثم الضغط على خيار رقم 5 خدمات العربي نت والعربي موبايل.\n\nمن داخل المملكة / 8001244040\n\nمن خارج المملكة / +966 11 212 7555', 'modified': '2022-10-30T08:17:59Z'}			en	sa	anb-arab-national-bank	The application always hangs. Don't focus on the appearance and neglect the content. Improve your communications. It took a whole hour for the confirmation number to arrive after the deadline. This problem always recurs.	ar	application always hang dont focus appearance neglect content improve communications take whole hour confirmation number arrive deadline problem always recur	Negative	App Store	1	0	1
App Store	7fd56b05-9bf4-4072-894b-04f1d5549b03	خاصية البحث والموقع ضعيفة	10/26/22 7:38	مشكلة في الدخول	{'id': 32860622, 'body': 'عميلنا العزيز شكرا لتعاملك مع البنك العربي الوطني، نتطلع دائماً الى تقديم الافضل لكم، الرجاء تزويدنا بملاحظات على التطبيق عبر البريد الالكتروني: ebank@anb.com.sa وللمساعدة ارجوا الاتصال على هاتف العربي، خدمات الحسابات ومن ثم الضغط على خيار رقم 5 خدمات العربي نت والعربي موبايل.\n\nمن داخل المملكة / 8001244040\n\nمن خارج المملكة / +966 11 212 7555\n\nمع تحيات فريق دعم العر…			en	sa	anb-arab-national-bank	The application logs in and requests a connection from the bank, but it has become unable to log in. Please address the issue.	ar	application log request connection bank become unable log please address issue	Negative	App Store	0	1	0
App Store	822c3ad1-d74b-474a-b6a3-54f3cd52f547	Alaa alsharif	10/25/22 13:47	👎🏻👎🏻👎🏻👎🏻	{'id': 32861344, 'body': 'عميلنا العزيز شكرا لتعاملك مع anb، نتطلع دائماً الى تقديم الافضل لكم، الرجاء تزويدنا بملاحظاتك على التطبيق عبر البريد الالكتروني: ebank@anb.com.sa وللمساعدة ارجوا الاتصال على هاتف العربي، خدمات الحسابات ومن ثم الضغط على خيار رقم 5 خدمات العربي نت والعربي موبايل.\n\nمن داخل المملكة / 8001244040\n\nمن خارج المملكة / +966 11 212 7555', 'modified': '2022-10-30T08:24:18Z'}			en	sa	anb-arab-national-bank	It is not opening. I need to receive a call and there is no new call. The Salhafa Bank is evolving, God willing, but when it opens, I will transfer all my money to another bank instead of the nonsense that I suffer from every time.	ar	open need receive call new call salhafa bank evolve god will open transfer money another bank instead nonsense suffer every time	Negative	App Store	1	1	0
App Store	8e19e087-d01f-4f08-b068-0033c941b2ba	Sara Alqa7ba	9/25/22 16:43	.				en	sa	anb-arab-national-bank	They put the minimum recharge card in the application at 100? Strange behavior ð¤ðð¼	ar	put minimum recharge card application strange behavior	Negative	App Store	1	0	0
App Store	d3bcb1d5-4045-4adf-b976-fc174779df52	كمال الهلاا	7/27/22 15:57	مع تحديث -٥.٦				en	sa	anb-arab-national-bank	With update 15.6, it cannot be used.	ar	update use	Negative	App Store	0	1	0
App Store	1b5b07ca-399a-42c5-9f82-c5caadde4145	ALNOURA111	8/25/22 13:26	.	{'id': 32300333, 'body': 'عميلنا العزيز شكرا لتعاملك مع البنك العربي الوطني، نتطلع دائماً الى تقديم الافضل لكم، الرجاء تزويدنا بملاحظات على التطبيق عبر البريد الالكتروني: ebank@anb.com.sa وللمساعدة ارجوا الاتصال على هاتف العربي، خدمات الحسابات ومن ثم الضغط على خيار رقم 5 خدمات العربي نت والعربي موبايل.\n\nمن داخل المملكة / 8001244040\n\nمن خارج المملكة / +966 11 212 7555\n\nمع تحيات فريق دعم العر…			en	sa	anb-arab-national-bank	The application is very bad and inconvenient to use, and there is no electronic communication.	ar	application bad inconvenient use electronic communication	Negative	App Store	1	0	0
App Store	350abc6a-35b7-411e-b67a-da173a3f1cf6	Ahmedalamri	8/23/22 19:46	تغير التطبيق الي العميل العادي				en	sa	anb-arab-national-bank	When will the Golden Arabic app be back!?	ar	golden arabic app back	Neutral	App Store	0	0	0
App Store	d0f85690-2303-4a76-90d7-49a1326d76bc	Brkan505 KSA	8/13/22 11:13	يقولون افتح حساب اونلاين واذا جيت تفعله يجمدونه				en	sa	anb-arab-national-bank	"I opened an account and tried to activate it but it was rejected. I called customer service and they said my account is frozen, and I need to go to the branch. What a frustrating way to attract fake customers."	ar	open account try activate reject call customer service say account freeze need go branch frustrate way attract fake customers	Negative	App Store	1	1	1
App Store	9ea9b4a2-3aeb-46a2-9680-6a04ad3388a8	ابورهام 6	7/29/22 0:38	فتح حساب قاصر تابع				en	sa	anb-arab-national-bank	It is advisable to add an option to open an account for minors through the application or website.	ar	advisable add option open account minors application website	Neutral	App Store	0	1	0
App Store	13ffac8e-7d8a-43b0-bc8a-0915567b5373	Nouf123546	7/27/22 17:48	بطيء	{'id': 32860669, 'body': 'عميلنا العزيز\n\nشكرا لتعاملك مع البنك العربي الوطني،\n\nالتطبيق يعمل بكفاءة في حال استمرار المشكلة، الرجاء التواصل معنا عبر البريد الالكتروني: ebank@anb.com.sa \nأو الاتصال على هاتف العربي، خدمات الحسابات ومن ثم الضغط على خيار رقم 5 خدمات العربي نت والعربي موبايل.\n\nمن داخل المملكة / 8001244040\n\nمن خارج المملكة / +966 11 212 7555\nمع تحيات فريق دعم العربي نت والعربي …			en	sa	anb-arab-national-bank	The application is very slow, it freezes, and confirmation messages are delayed and do not arrive on time.	ar	application slow freeze confirmation message delay arrive time	Negative	App Store	1	0	1
App Store	c8535f39-c116-4636-b636-f2c11062f8ea	rooneex	7/27/22 16:51	مستخدم	{'id': 32861230, 'body': 'عميلنا العزيز شكرا لتعاملك مع anb، نتطلع دائماً الى تقديم الافضل لكم، الرجاء تزويدنا بملاحظاتك على التطبيق عبر البريد الالكتروني: ebank@anb.com.sa وللمساعدة ارجوا الاتصال على هاتف العربي، خدمات الحسابات ومن ثم الضغط على خيار رقم 5 خدمات العربي نت والعربي موبايل.\n\nمن داخل المملكة / 8001244040\n\nمن خارج المملكة / +966 11 212 7555\n', 'modified': '2022-10-30T08:15:05Z'}			en	sa	anb-arab-national-bank	They talk to him every week, the application is very bad, it crashes every now and then. Only God can help.	ar	talk every week application bad crash every god help	Negative	App Store	1	1	0
App Store	11513acb-1a13-4f75-9a3c-c0a8bb6095a7	abosaif-049	5/25/22 14:56	تطبيق جبار	{'id': 30043155, 'body': 'عميلنا العزيز شكرا لثقتك وتعاملك مع البنك العربي الوطني، نتطلع دائماً الى تقديم الافضل لكم \nمع تحيات فريق دعم العربي نت والعربي موبايل\n', 'modified': '2022-05-30T08:20:38Z'}			en	sa	anb-arab-national-bank	Thank you Arab Bank for the amazing application, to the extent that I can apply for a real estate loan through the application.	ar	thank arab bank amaze application extent apply real estate loan application	Positive	App Store	1	0	0
App Store	0b88ab33-9c02-4c13-9384-87dba151b648	Hasan Mashat	7/27/22 9:59	عطل في التطبيق				en	sa	anb-arab-national-bank	The application has not been working since the beginning of the day. After 5 hours, the message "The app is currently undergoing an update" was written.	ar	application work since begin day hours message app currently undergo update write	Negative	App Store	0	1	0
App Store	6b3b53ac-8cb6-442f-8e77-f84e4d5921e4	اطمع بالفردوس الاعلى	7/27/22 7:46	حي المصيف				en	sa	anb-arab-national-bank	The application is not working.	ar	application work	Negative	App Store	0	1	0
App Store	eb1be97a-978a-4df3-a050-99385c8cf6ef	quhti	7/27/22 4:59	للاسف تطبيق فاشل وخدمه فاشله وتحكم في صلاحيات العميل بطريقه غير لائقه				en	sa	anb-arab-national-bank	It means they have set specific times when I can log in and times when I cannot!! They ask me to update and I do not find any updates!! I log in and it tells me I am not registered!! I try to transfer or pay and it agrees and then it hangs up!! I have been waiting for more than 7 hours to receive my salary and benefit from it!! The biggest mistake in my life was opening an account with Al Arabi B…	ar	mean set specific time log time ask update find update log tell register try transfer pay agree hang wait hours receive salary benefit big mistake life open account al arabi bank	Negative	App Store	1	1	1
App Store	dcfe69e4-c482-4dca-93ae-363f8195682d	NorahNoor	7/14/22 21:47	تجاهل الرد على الرسائل عبر التطبيق.				en	sa	anb-arab-national-bank	I contacted the bank with a message through the application for more than two weeks and have not received a response yet! Sadly, the service is poor. It's better to deal with other banks.	ar	contact bank message application two weeks receive response yet sadly service poor good deal bank	Negative	App Store	1	1	0
App Store	21907ec5-2123-4512-a068-91537e346820	dahoom11	6/16/22 20:09	خطأً				en	sa	anb-arab-national-bank	An error appears when trying to register on Arabi Net, even though all the information is correct!	ar	error appear try register arabi net even though information correct	Neutral	App Store	0	1	0
App Store	8db9e257-7224-4677-a038-f087687bc0f8	manie-99	5/9/22 9:34	السعوديه	{'id': 30044672, 'body': 'عميلنا العزيز شكرا لثقتك وتعاملك مع البنك العربي الوطني، نتطلع دائماً الى تقديم الافضل لكم \nمع تحيات فريق دعم العربي نت والعربي موبايل\n', 'modified': '2022-05-30T09:11:57Z'}			en	sa	anb-arab-national-bank	Al Arabi Bank's application is one of the best banking applications in Saudi Arabia, truly distinctive, simple, and suitable for everyone. Thank you, Al Arabi Bank.	ar	al arabi bank application one best bank applications saudi arabia truly distinctive simple suitable everyone thank al arabi bank	Positive	App Store	0	0	0
App Store	70c2c0bb-c1ca-460c-af22-5df58910b5ec	popox❤️🇸🇦	5/16/22 2:53	.				en	sa	anb-arab-national-bank	My father is elderly and his account has been frozen, and I'm trying to open this application with him, but it says there is an error. Fear Allah and find a solution for your application. Banks are advancing while you are moving backwards, unfortunately.	ar	father elderly account freeze im try open application say error fear allah find solution application bank advance move backwards unfortunately	Negative	App Store	0	1	1
App Store	406acc40-910e-4568-93fc-9069cccbed99	ygg-4	4/4/22 10:09	حملته بعد اعلان بندر للتطبيق	{'id': 29027178, 'body': 'عميلنا العزيز شكرا لثقتك وتعاملك مع البنك العربي الوطني، نتطلع دائماً الى تقديم الافضل لكم \nمع تحيات فريق دعم العربي نت والعربي موبايل\n', 'modified': '2022-04-07T09:44:58Z'}			en	sa	anb-arab-national-bank	His services are excellent compared to some banks.	ar	service excellent compare bank	Positive	App Store	0	0	0
App Store	ecbbb461-4635-40e7-ba8a-889556aa766d	محمدددددددددددددددددد	4/27/22 18:02	معلق				en	sa	anb-arab-national-bank	Why is the program stuck? Every time I try to transfer or pay, it tells me that I am not connected to the internet.	ar	program stick every time try transfer pay tell connect internet	Negative	App Store	0	1	1
App Store	9a828be1-b898-4c9b-b71a-12afa87c674a	me amri	4/22/22 18:54	.				en	sa	anb-arab-national-bank	Very bad application, every time I have to enter the username and it does not support quick login.	ar	bad application every time enter username support quick login	Negative	App Store	1	1	0
App Store	47b51228-d37c-4acf-832a-de97de2ebee0	mohamd37	4/20/22 21:17	التحديث الاخير للتطبيق				en	sa	anb-arab-national-bank	The latest update caused some issues with the Visa card account (payments and rewards). We hope to develop the application further and add services to reduce the need for additional branches.	ar	late update cause issue visa card account payments reward hope develop application add service reduce need additional branch	Neutral	App Store	0	1	0
App Store	649bfe46-57c3-498e-b6b3-a0ae67b25bdb	rrr.Faisal	3/25/22 16:22	خدمة ممتازه	{'id': 28802415, 'body': 'عميلنا العزيز شكرا لثقتك وتعاملك مع البنك العربي الوطني، نتطلع دائماً الى تقديم الافضل لكم \nمع تحيات فريق دعم العربي نت والعربي موبايل', 'modified': '2022-03-27T07:21:38Z'}			en	sa	anb-arab-national-bank	I received an excellent service from Mr. Abdulrahman Al-Murshid at Al-Yawwok Bank, may he be blessed. InshaAllah, I will be one of this esteemed bank's customers.	ar	receive excellent service mr abdulrahman almurshid alyawwok bank may bless inshaallah one esteem bank customers	Positive	App Store	0	0	0
App Store	4a792c43-3be5-4500-b286-4cd51dc4ef93	s.alo.s	1/24/22 6:57	تطبيق رائع	{'id': 28692872, 'body': 'عميلنا العزيز شكرا لثقتك وتعاملك مع البنك العربي الوطني، نتطلع دائماً الى تقديم الافضل لكم \nمع تحيات فريق دعم العربي نت والعربي موبايل\n', 'modified': '2022-03-21T11:17:31Z'}			en	sa	anb-arab-national-bank	The best application	ar	best application	Positive	App Store	0	0	0
App Store	01f2b7ff-1bfe-4d1f-a726-11f449c029e5	Chkgauimcx	2/26/22 8:13	رسايل التوثيق				en	sa	anb-arab-national-bank	Delayed authentication messages!!?	ar	delay authentication message	Negative	App Store	0	0	1
App Store	ec4670ef-219b-4bb6-b698-44aaa29571f0	maajjrrooh	2/23/22 11:35	مشاكل هالبنك لاتنتهي				en	sa	anb-arab-national-bank	Unfortunately, the application is annoying. The quick login does not work despite using the correct method.	ar	unfortunately application annoy quick login work despite use correct method	Negative	App Store	1	1	0
App Store	064593db-6eca-4766-8604-5a0160de906a	saad aljamea	1/13/22 12:57	هناك مشكلة عند محاولة تفعيل الحسال	{'id': 27898521, 'body': 'عميلنا العزيز\n\nشكرا لتعاملك مع البنك العربي الوطني،\n\nالتطبيق يعمل بكفاءة في حال استمرار المشكلة، الرجاء التواصل معنا عبر البريد الالكتروني: ebank@anb.com.sa \nأو الاتصال على هاتف العربي، خدمات الحسابات ومن ثم الضغط على خيار رقم 5 خدمات العربي نت والعربي موبايل.\n\nمن داخل المملكة / 8001244040\n\nمن خارج المملكة / 966112127555+\n', 'modified': '2022-02-07T14:46:31Z'}			en	sa	anb-arab-national-bank	The application does not allow entering more than three characters for the new username and the requirement is to have 6-8 characters. How can I activate my account and create a user?	ar	application allow enter three character new username requirement character activate account create user	Negative	App Store	0	1	0
App Store	19297ecd-0037-4df0-88b9-cc32152173fb	suad surur	1/5/22 1:26	اسوء بنك اسوء تطبيق				en	sa	anb-arab-national-bank	Instant transactions don't work. All banks have evolved except for you in the parallel world. Why do I have to give an order to sell stocks through mobile banking?	ar	instant transactions dont work bank evolve except parallel world give order sell stock mobile bank	Negative	App Store	0	1	0
App Store	13e95634-45e0-47e1-8404-192a7bae950e	الشريف07	1/2/22 7:29	هل بامكاني احدث الحساب الغير النشط عن طريق التطبيق..؟				en	sa	anb-arab-national-bank	Account update	ar	account update	Neutral	App Store	0	1	0
App Store	7d7fff35-21b6-497f-8164-fb2ebca8aff3	الخضيري 99	1/13/22 11:19	التطبيق ثقيل جداااااااااا	{'id': 27898534, 'body': 'عميلنا العزيز\n\nشكرا لتعاملك مع البنك العربي الوطني،\n\nالتطبيق يعمل بكفاءة في حال استمرار المشكلة، الرجاء التواصل معنا عبر البريد الالكتروني: ebank@anb.com.sa \nأو الاتصال على هاتف العربي، خدمات الحسابات ومن ثم الضغط على خيار رقم 5 خدمات العربي نت والعربي موبايل.\n\nمن داخل المملكة / 8001244040\n\nمن خارج المملكة / 966112127555+\n', 'modified': '2022-02-07T14:47:04Z'}			en	sa	anb-arab-national-bank	The application is slow in opening, and I have to reset my password every day.	ar	application slow open reset password every day	Negative	App Store	0	1	1
App Store	db2563f0-6bb1-4bac-aa1b-1f450231b94e	Fox ww	2/16/22 13:21	App issue				en	us	anb-arab-national-bank	The app was working very well until last week. Whenever I login the app suddenly freez. Iâve been trying to log in to my account since last week but every time the same issue happens. Please fix it	en	app work well last week whenever login app suddenly freez ive try log account since last week every time issue happen please fix	Neutral	App Store	0	1	0
App Store	f6fe53c0-ccff-4173-a372-2cfaf805b4e4	Safalqurashi	2/5/22 8:34	ANB	{'id': 27897992, 'body': 'Dear customer\n\nThank you for writing to us. In order to help you solve the problem. Please contact us via e-mail at: ebank@anb.com.sa\nOr call ANB Phone Banking and select account services (Option1) then select internet services (Option 5)\n\nLocal: 8001244040\n\nAbroad: +966 11 212 7555\n\nSincerely\nANB Net and Mobile banking Support Team\n', 'modified': '2022-02-07T…			en	us	anb-arab-national-bank	The worst banking app Iâve ever used	en	bad bank app ive ever use	Negative	App Store	1	0	0
App Store	c72211d2-75a0-46d3-b6cb-979fee40d0a9	tuakvVfk	10/23/22 10:08	فاشل	{'id': 32861350, 'body': 'عميلنا العزيز شكرا لتعاملك مع anb، نتطلع دائماً الى تقديم الافضل لكم، الرجاء تزويدنا بملاحظاتك على التطبيق عبر البريد الالكتروني: ebank@anb.com.sa وللمساعدة ارجوا الاتصال على هاتف العربي، خدمات الحسابات ومن ثم الضغط على خيار رقم 5 خدمات العربي نت والعربي موبايل.\n\nمن داخل المملكة / 8001244040\n\nمن خارج المملكة / +966 11 212 7555', 'modified': '2022-10-30T08:24:47Z'}			en	us	anb-arab-national-bank	The latest update is not useful and complicated in terms of logging in, as it requires registering the device, despite not changing the device. I will delete it and will not deal with this bank again.	ar	late update useful complicate term log require register device despite change device delete deal bank	Negative	App Store	1	1	0
App Store	8013589f-9d99-4521-84aa-f700c57a99a6	بلا حدود	7/27/22 7:03	التطبيق ثقييييل				en	us	anb-arab-national-bank	"It doesn't open, it's slow, and it needs an update because of the decrease in salaries, it has become like this."	ar	doesnt open slow need update decrease salaries become like	Negative	App Store	0	1	1
