# Supplementary material for: Retrieval-augmented generation analysis of user reviews in Saudi mobile banking apps: a comparative user experience study of iOS and Android
Source: PeerJ journal article supplement (doi:10.7717/peerj-cs.3565), 2026-02-06
Supplement: iOS.zip [file fransimobile_final.xlsx]

## Sheet: Sheet 1 - fransimobile_final
fransimobile_final
source	review_id	user_name	review_date	review_title	developer_response	developer_response_date	thumbs_up	language_code	country_code	ï»¿source	review_date	developer_response	developer_response_date	thumbs_up	app_name	review_description	en	cleaned_reviews	Sentiment	Satisfaction	Effectiveness	Efficiency
App Store	c6e51623-1ef0-4952-a8d0-00ae8541ae35	sbarayan	4/19/22 9:23	App not opening				en	ca	App Store	4/19/22 9:23				fransimobile	With the new updates and Ramadan Theme, the app is not opening on the IPad anymore. Need to be fixed.	en	new update ramadan theme app open ipad anymore need fix	Negative	0	1	0
App Store	c937827b-c04b-491e-b75a-bb56480a322b	monrod 123	3/12/23 0:54	سي				en	gb	App Store	3/12/23 0:54				fransimobile	Very bad	ar	bad	Negative	1	0	0
App Store	8979a3bc-7fe7-4e50-9b4c-a17592f05d05	Ammar 212	4/5/23 5:47	Bad user interface				en	sa	App Store	4/5/23 5:47				fransimobile	The user interface of the app is horrible. Almost all other banks updated their user interface very nicely except Faransi. Also the app is vert slow !!	en	user interface app horrible almost bank update user interface nicely except faransi also app vert slow	Negative	1	0	1
App Store	b01b8d94-5d4f-4708-b528-4eb592d2433a	NaiefL	11/20/22 4:59	Super Slow				en	sa	App Store	11/20/22 4:59				fransimobile	During the last week the App has been extremely slow and constantly lagging. I hope that the issue is resolved soon. I have deleted and re-installed the app but no improvement in the performance. Quite disappointing from such a bank! Definitely considering to move banks if this is not resolved soon. Iâm also surprised that no correspondence from the bank has taken place as this is an issue that…	en	last week app extremely slow constantly lag hope issue resolve soon delete reinstall app improvement performance quite disappoint bank definitely consider move bank resolve soon im also surprise correspondence bank take place issue affect users	Negative	1	0	1
App Store	a21567f9-cd3e-426c-83df-b262e5dd0a54	Hdos566	5/26/23 17:37	Omg				en	sa	App Store	5/26/23 17:37				fransimobile	I swear one of the worst decisions that Iâve ever made is opening an account with this bank, I gave them a lot of another chances to fix their UX issues but it seems they still didnât care that much about our online bank experience however , Iâm definitely considering deleting my account soon whenever available.	en	swear one bad decisions ive ever make open account bank give lot another chance fix ux issue seem still didnt care much online bank experience however im definitely consider delete account soon whenever available	Negative	1	1	0
App Store	3b2dfead-0b1b-4935-8261-8a2597bbce01	Dehmy19	10/20/22 22:34	Online banking				en	sa	App Store	10/20/22 22:34				fransimobile	Its been 3 days now the app is very slow and I cannot received OTP on registered number while before this happened itâs working properly,what happened please I need an answer I cannot access my online banking while I am here in Philippines. Need to fix ASAP.	en	days app slow receive otp register number happen work properlywhat happen please need answer access online bank philippines need fix asap	Negative	0	1	1
App Store	07199408-f266-45f1-91db-970b8c8ad3e0	K M Al	3/8/23 9:40	Local transfer				en	sa	App Store	3/8/23 9:40				fransimobile	There is a recurring problem in transferring money to local/national banks. The Application doesnât respond!! Overall, the app is slow and lagging.	en	recur problem transfer money localnational bank application doesnt respond overall app slow lag	Negative	1	0	1
App Store	77f02339-26eb-47e3-98d8-a9c74c98b0a5	ihalzain	3/3/23 5:45	Very Slow and out dated				en	sa	App Store	3/3/23 5:45				fransimobile	Extremely slow and outdated, not sure why BSF still hasnât updated their app yet but if they start relying on the website more it would be more efficient instead of using such outdated software application.	en	extremely slow outdated sure bsf still hasnt update app yet start rely website would efficient instead use outdated software application	Negative	1	0	1
App Store	a4ccf0ac-f460-4211-a6e8-1a845db44abc	atc0001	2/15/23 18:08	Slow App				en	sa	App Store	2/15/23 18:08				fransimobile	Since 10 days the application doesnât work properly: slow doesnât complete the transfer, sometimes takes you out of the Application!! Any response regarding this issue!!	en	since days application doesnt work properly slow doesnt complete transfer sometimes take application response regard issue	Negative	0	1	1
App Store	25286d03-e30a-4605-bc4d-94eea530ad56	Sultaaaaaaannnnn	6/5/23 10:25	Slowest bank app in Saudi				en	sa	App Store	6/5/23 10:25				fransimobile	This is the worst application and the most outdated one compared to all banks, the app got an awful user interface and the its really slow. SFB never changed anything I think they will loose lots of clients because of their useless app.	en	bad application outdated one compare bank app get awful user interface really slow sfb never change anything think loose lot clients useless app	Negative	1	0	1
App Store	eab8a384-222d-4c05-bee8-2eff3448a567	hadialmohsen	10/4/22 18:34	Very slow and won't work				en	sa	App Store	10/4/22 18:34				fransimobile	It was slow but now it is not functioning at all it just won't login by using any method face id sms or fast login, please fix this issue asap we cant work like this	en	slow function wont login use method face id sms fast login please fix issue asap cant work like	Negative	0	1	1
App Store	52b1822a-fa89-4c62-a235-904f8e334153	̿s̿υ̿ρ̿є̿я	8/13/23 2:30	Can’t long in any way!				en	sa	App Store	8/13/23 2:30				fransimobile	There is a problem with your program!Itâs refuses to log in even though the information is correct! fix this	en	problem programits refuse log even though information correct fix	Negative	0	1	0
App Store	a012881a-8511-4c08-adca-ba9e76e9744a	أبوبدر الحربي	2/15/23 18:01	Slow and crashing				en	sa	App Store	2/15/23 18:01				fransimobile	It is the worst bank app I have ever used. Very slow and crashes all the time. It is strange for a bank to have such app. Banks always have the resources to make the best apps!!!	en	bad bank app ever use slow crash time strange bank app bank always resources make best apps	Negative	1	1	1
App Store	3a45a795-0019-48e5-84f9-3bb3aa5a2e7c	Shrikh Jarrah2021	11/8/22 6:59	Too slow and too bad				en	sa	App Store	11/8/22 6:59				fransimobile	Very slow. For the past three days the application has been slow and performing very poor	en	slow past three days application slow perform poor	Negative	1	0	1
App Store	66c7897e-f9ca-46ca-b198-fe47fb491050	moebaq	1/20/23 16:30	Can’t login				en	sa	App Store	1/20/23 16:30				fransimobile	Every couple of days this app forgets the trusted devise and i have to register again, and when I try to sign in, it wont even get past the user guide screen	en	every couple days app forget trust devise register try sign wont even get past user guide screen	Negative	0	1	0
App Store	3ad8205c-9356-446f-b807-21bad35dcae8	مشكله بعد التحديث الجديد	8/21/23 20:08	Bad update				en	sa	App Store	8/21/23 20:08				fransimobile	I can't to the app after the last update .. i receive the error message (please open GPS then try access again)	en	cant app last update receive error message please open gps try access	Negative	0	1	0
App Store	79ea6f59-3850-474f-9506-3df7dc279005	Kiyasdeen	8/31/22 18:50	Fransi Mobile User				en	sa	App Store	8/31/22 18:50				fransimobile	The app is not working well since the last month. It is very slow and does not even work.	en	app work well since last month slow even work	Negative	0	1	1
App Store	0b3f3549-7390-45ad-bdbb-0d9aabccfc16	gimmy١٧	11/7/22 14:39	Worst bank application				en	sa	App Store	11/7/22 14:39				fransimobile	I canât imagine this is a an application of a bank Not working all the times Not sending codes for log in How can this be a bank	en	cant imagine application bank work time send cod log bank	Negative	0	1	0
App Store	e9cd5927-67ec-4619-9d51-f989b4310ed1	moha.1994	11/1/22 6:10	The is very slow				en	sa	App Store	11/1/22 6:10				fransimobile	Fix the app i cant do anything what is this bad service it is been more than two months.	en	fix app cant anything bad service two months	Negative	1	1	0
App Store	0c8bb1d6-ebdf-4215-931a-5165980b8ee9	JagularVein	8/26/23 11:26	The app was fine now not working				en	sa	App Store	8/26/23 11:26				fransimobile	I canât pay bills it doesnât recognize my accounts	en	cant pay bill doesnt recognize account	Negative	0	1	0
App Store	b71fe9d5-9fdb-43d7-b7ab-d329c126fe47	Sallamsallam	1/11/23 22:30	Hanging				en	sa	App Store	1/11/23 22:30				fransimobile	Before the application was perfect now really itâs very bad and always hangs I wish anybody respond. I trust your bank but really you need to improve the application.	en	application perfect really bad always hang wish anybody respond trust bank really need improve application	Negative	1	0	1
App Store	2a01b2f2-3246-4444-a929-6db4ad13c332	Ffffffffffayyyy	12/11/22 2:42	The app is not working				en	sa	App Store	12/11/22 2:42				fransimobile	The app it's not working since last month and it's not received the OTP , I hope solve this problem this week	en	app work since last month receive otp hope solve problem week	Negative	0	1	0
App Store	80a335dc-a990-4621-ac9c-b990caaf9033	Nasser18	5/25/23 15:35	Bad app				en	sa	App Store	5/25/23 15:35				fransimobile	Very bad. Most of time is hanging and bad synchronization with security sms. It has been years since you upgraded to this bad app without any improvements.	en	bad time hang bad synchronization security sms years since upgrade bad app without improvements	Negative	1	0	1
App Store	500694ee-44cc-4b16-837f-91afdc22c463	Ibrahim Elfeky	7/29/23 22:50	تقييم Rating preview				en	sa	App Store	7/29/23 22:50				fransimobile	The application is very slow in processing and sending confirmation messages, please work on improving the performance of the application.	ar	application slow process send confirmation message please work improve performance application	Negative	0	0	1
App Store	c86d4736-206d-4a78-a16e-a036d2ad5ab3	Abniaf454	9/13/23 10:05	Application				en	sa	App Store	9/13/23 10:05				fransimobile	The application is a failure and does not serve customers. The bank has not witnessed development in addressing weaknesses from bad to worse.	en	application failure serve customers bank witness development address weaknesses bad bad	Negative	1	1	0
App Store	28b16fc9-b317-4bda-bbe7-00638f53a31e	madharb	5/26/23 16:56	So slow and keeps crashing				en	sa	App Store	5/26/23 16:56				fransimobile	So slow and keeps crashing	en	slow keep crash	Negative	0	1	1
App Store	17fcc7d5-0cff-44f3-86cf-d0be6f7e0814	Carbon.Ignite	11/26/22 16:34	Does not open				en	sa	App Store	11/26/22 16:34				fransimobile	Extremely bad. Does not open at all.	en	extremely bad open	Negative	1	1	0
App Store	123cbb69-d887-4022-a58e-5f801c2f42e9	MaherAlJasem	11/23/22 7:26	Best App				en	sa	App Store	11/23/22 7:26				fransimobile	It is the best banking app I used	en	best bank app use	Positive	0	0	0
App Store	f4756df4-e91f-4f05-b46f-3ce30b2fd0ad	azizlegend	11/7/22 18:26	Miserable app				en	sa	App Store	11/7/22 18:26				fransimobile	Canât believe a bank as such has this slow, unreliable app	en	cant believe bank slow unreliable app	Negative	1	0	1
App Store	2b5d7178-ea85-45ba-9c59-40a240f32fe7	Mhalas79	4/3/23 10:47	The app is very very slow				en	sa	App Store	4/3/23 10:47				fransimobile	It is really vey silly to have a bank application on slow motion	en	really vey silly bank application slow motion	Negative	1	0	1
App Store	069749cb-88ec-4746-b8a0-e5941132ca39	MDXRW	3/4/23 14:45	Worst app				en	sa	App Store	3/4/23 14:45				fransimobile	The app most of the time lagging and sometimes doesnât work	en	app time lag sometimes doesnt work	Negative	0	1	1
App Store	7559fcb5-0390-44c4-a9a6-b82634e7c2f8	Mustafa.Sabry	10/28/22 16:50	Slow				en	sa	App Store	10/28/22 16:50				fransimobile	The app response is very slow	en	app response slow	Negative	0	0	1
App Store	229c1f5c-ed70-4676-9a10-1b2661b5c223	Wesamibrah	6/29/23 19:30	Slow				en	sa	App Store	6/29/23 19:30				fransimobile	The slowest bank mobile application in Saudi	en	slow bank mobile application saudi	Negative	0	0	1
App Store	7d3698e9-7ba2-41fb-ada4-83795c685a8e	Mohmmad-966	3/5/23 22:36	Worst Bank app				en	sa	App Store	3/5/23 22:36				fransimobile	One of the worst bank apps Iâve ever used !!! Very slow always lagging and bugging!!!	en	one bad bank apps ive ever use slow always lag bug	Negative	1	0	1
App Store	54258e46-f1b3-4699-ab51-667ea65f412b	Hhaassaann	9/8/23 6:42	Bad App				en	sa	App Store	9/8/23 6:42				fransimobile	Its very slowly, and i cant use it after i update my iPhone I.O.S 16.6.1 , its not compatible with new update .	en	slowly cant use update iphone ios compatible new update	Negative	0	1	0
App Store	67442152-ea3e-4b81-99e5-047fd0ae80a3	Mohammed aldiwihi	3/2/23 6:33	Facing trouble to open the app				en	sa	App Store	3/2/23 6:33				fransimobile	The app doesn't work	en	app doesnt work	Negative	0	1	0
App Store	74aeda06-18f5-430b-9a63-826d990e3162	7essy	6/2/23 10:45	Needs A LOT of improvements!				en	sa	App Store	6/2/23 10:45				fransimobile	Worst bank application in Saudi!	en	bad bank application saudi	Negative	1	0	0
App Store	e7e09d88-f4d4-4462-bcb0-04c4f5ce3829	Asmary9090	1/10/23 11:43	The app is not working				en	sa	App Store	1/10/23 11:43				fransimobile	For the third day now the app is not working	en	third day app work	Negative	0	1	0
App Store	77a6486e-ccc1-4dca-98ca-348fc99489d3	Mr1wan	2/11/23 9:58	Worst bank app ever				en	sa	App Store	2/11/23 9:58				fransimobile	Worst bank app ever	en	bad bank app ever	Negative	1	0	0
App Store	d49381c6-cdb1-4964-8f3c-5f7b57e74941	Medox91	10/23/22 18:08	Just a disaster APP				en	sa	App Store	10/23/22 18:08				fransimobile	Disaster Bank , Disaster APP !! U cannot even receive OTP sms !!	en	disaster bank disaster app u even receive otp sms	Negative	0	1	0
App Store	1fc350ec-289f-483a-8d45-656e6eee4e46	Assaf9780	12/22/22 9:49	Bad				en	sa	App Store	12/22/22 9:49				fransimobile	Super slow!!!!	en	super slow	Negative	0	0	1
App Store	0e87dd23-ca0c-45c8-8cbe-06bdaf329ba1	Apps55	6/26/23 21:14	BAD APPLICATION				en	sa	App Store	6/26/23 21:14				fransimobile	Worst application ever	en	bad application ever	Negative	1	0	0
App Store	2519c901-fa81-4bc8-9b8f-b34b25044085	bjam90	7/2/22 17:18	Not good enough				en	sa	App Store	7/2/22 17:18				fransimobile	Unfortunately, this latest version doesnât compete with the other top banks mobile apps. Yes the interface and theme looks âniceâ but still lacks the efficiency and innovative ease-of-use that others provide. This is not a serious improvement, 1 star from me.	en	unfortunately late version doesnt compete top bank mobile apps yes interface theme look nice still lack efficiency innovative easeofuse others provide serious improvement star	Negative	1	0	0
App Store	b4c59bff-e3cd-4e41-a622-ed767a00abfc	horiyatjeddah	4/22/22 16:48	Problematic latest version				en	sa	App Store	4/22/22 16:48				fransimobile	Iâve been using Fransi mobile app for many years without any problems. Today, just after downloading the latest version my icon is blocked and I cannot log in. Can you help me ?	en	ive use fransi mobile app many years without problems today download late version icon block log help	Negative	0	1	0
App Store	0021b25d-d24c-41e0-bdaf-5d2f81a3201e	F9988999	5/26/22 8:18	Slowly application				en	sa	App Store	5/26/22 8:18				fransimobile	The Application is not updating the information quickly, i changed phone number to my identity and i toke many hours without any update on the application information .	en	application update information quickly change phone number identity toke many hours without update application information	Negative	0	1	0
App Store	5e3534d7-6721-4b76-a204-5c1a737c967f	Bijapure	4/22/22 16:50	Worst service after download				en	sa	App Store	4/22/22 16:50				fransimobile	Unable to login after update. Receiving message âupdate to latest versionâ while my app is very much updated to version 12.4	en	unable login update receive message update late version app much update version	Negative	0	1	0
App Store	37d227f4-71fd-4245-a826-a627ad3794ad	fahd282	4/23/22 1:28	You have issue in your app after update				en	sa	App Store	4/23/22 1:28				fransimobile	You have issue in your app after update, it ask me to update and itâs already updated!!!!	en	issue app update ask update already update	Negative	0	1	0
App Store	e5df0565-2a68-41a9-b7cd-7f2b94ff6a83	guoijhdrt	4/22/22 13:49	Wont sign in				en	sa	App Store	4/22/22 13:49				fransimobile	Every time I tried to sign in An error message pops up sayin download the latest version. Even though I have the latest version ð¤·ð»ââï¸	en	every time try sign error message pop sayin download late version even though late version	Negative	0	1	0
App Store	4ca59195-8648-4c0a-a9db-a7216fab1d09	$*^bob$^*	4/22/22 20:32	Not working				en	sa	App Store	4/22/22 20:32				fransimobile	After updating whenever I try to login it state you need to update ____	en	update whenever try login state need update	Negative	0	1	0
App Store	4ca59195-8648-4c0a-a9db-a7216fab1d09	$*^bob$^*	4/22/22 20:32	Not working				en	sa	App Store	4/22/22 20:32				fransimobile	After updating whenever I try to login it state you need to updateNot working	en	update whenever try login state need updatenot work	Negative	0	1	0
App Store	9129355a-d1ed-4253-9b80-5e3e6201bf30	Maher's Iphone	4/22/22 8:07	The application is not working after latest update				en	sa	App Store	4/22/22 8:07				fransimobile	The program is not working after the latest update.	ar	program work late update	Negative	0	1	0
App Store	6fed99ca-8b58-4c81-9b9c-fd0fc617bcb5	Tahir512	1/11/22 14:29	Good Application				en	sa	App Store	1/11/22 14:29				fransimobile	Not Excellent But ItÕs Okay	en	excellent okay	Neutral	0	0	0
App Store	151b6519-66f8-44ba-b3de-8e36242f4e1b	Muhannad Basalem	7/7/22 7:41	TOO SLOW				en	sa	App Store	7/7/22 7:41				fransimobile	The slowest banking app! Too bad. So many fixes they have.	en	slow bank app bad many fix	Negative	1	0	1
App Store	21fa9cbd-42d8-47f9-9618-223b5d788663	rakan alsaedi	5/28/22 2:48	Important				en	sa	App Store	5/28/22 2:48				fransimobile	Does not work	en	work	Negative	0	1	0
App Store	f75ee260-2eaf-4ae6-a5ac-6d3b129cd19f	old customer 22	7/7/22 19:00	Worst bank in Ksa				en	sa	App Store	7/7/22 19:00				fransimobile	Bad service online and in the bank in Ksa	en	bad service online bank ksa	Negative	1	0	0
App Store	0f610d60-0a3b-4ee6-ab97-d854f2ce4cd5	Hanouf Fa	4/23/22 0:57	Not working				en	sa	App Store	4/23/22 0:57				fransimobile	The worst update!	en	bad update	Negative	1	0	0
App Store	caf6b128-ed24-4916-bbb8-8aa0762dc730	sahtaf2	3/10/22 14:32	not working				en	sa	App Store	3/10/22 14:32				fransimobile	program not working gave error	en	program work give error	Negative	0	1	0
App Store	e71d7106-73c9-4786-9e02-6671328444ab	myes1996	1/15/22 2:26	Bad				en	sa	App Store	1/15/22 2:26				fransimobile	The worst bank ever	en	bad bank ever	Negative	1	0	0
App Store	0c543f81-3d0e-4403-ae76-2783080a75a4	Zoyed	12/21/22 1:19	فاشل				en	sa	App Store	12/21/22 1:19				fransimobile	I have been with the French bank for 19 years because their branch is close to my house and because of my relationships with many of their employees. However, they are always failing in their electronic systems and this application is always malfunctioning with me. Yesterday, for example, I wanted to pay my electricity bill but I couldn't log in. Many issues happen with this bad application despi…	ar	french bank years branch close house relationships many employees however always fail electronic systems application always malfunction yesterday example want pay electricity bill couldnt log many issue happen bad application despite fact constantly update device new	Negative	1	1	0
App Store	80fa1d22-0fd7-4346-b068-1e300dbb5e5d	somaa2009	9/17/23 2:50	جدة				en	sa	App Store	9/17/23 2:50				fransimobile	The application is very slow. Please update the application. It is not quick in logging in and transitioning from one page to another.	ar	application slow please update application quick log transition one page another	Negative	0	0	1
App Store	8fc61e1a-991a-4dc8-9d52-d9d741d7877c	sa-sd-uyp	9/13/23 12:15	اسوء برنامج بنكي				en	sa	App Store	9/13/23 12:15				fransimobile	The worst banking program	ar	bad bank program	Negative	1	0	0
App Store	946f4b62-71bf-4998-9a78-bfba488c6432	SM667799	9/10/23 14:08	Very bad application تطبيق سيء جدا				en	sa	App Store	9/10/23 14:08				fransimobile	Very bad application According to the bank's customer service employee, they are currently working on creating a new application, and God willing, it will meet our expectations.	ar	bad application accord bank customer service employee currently work create new application god will meet expectations	Negative	1	1	0
App Store	0777ff20-484f-4081-8ce3-f1f620589628	آل هيازع	9/4/23 10:34	تطبيق فاشل				en	sa	App Store	9/4/23 10:34				fransimobile	The application is bad in terms of login and local transactions are complicated, and every month the transfer gets delayed for days.	ar	application bad term login local transactions complicate every month transfer get delay days	Negative	1	1	1
App Store	7a836329-f1a0-4530-bd4a-9b436e5aba5a	Mohammed Jassem	9/3/23 13:16	بطيء				en	sa	App Store	9/3/23 13:16				fransimobile	The worst banking application out of 7 banks whose applications I use.	ar	bad bank application bank whose applications use	Negative	1	0	0
App Store	69380ab3-dec1-4294-a247-840d73833cb6	HANIA-16 هاني	8/28/23 3:16	تطبيق سيء				en	sa	App Store	8/28/23 3:16				fransimobile	Failure and does not suit a bank.	ar	failure suit bank	Negative	1	1	0
App Store	6a1d3f1e-39c3-4a42-9658-2b968957b3a7	Medo yx	8/27/23 6:54	تطبيق فاشل				en	sa	App Store	8/27/23 6:54				fransimobile	I apologize for rating the bank's application with one star. If there was a lower rating, I would have given it. After the update, I discovered that the bank's quality has unfortunately deteriorated. I have lost trust in it, as a customer of 19 years.	ar	apologize rat bank application one star low rat would give update discover bank quality unfortunately deteriorate lose trust customer years	Negative	1	0	0
App Store	28cb6560-23ca-4bb0-bf52-192ea8cf7801	Aziza4283	8/26/23 17:54	مشاكل متكررة				en	sa	App Store	8/26/23 17:54				fransimobile	The temporary password does not arrive quickly, it takes time.	ar	temporary password arrive quickly take time	Negative	1	0	1
App Store	c0c4aff5-b972-4b9d-a1a2-b8ffaf12448d	jassaryaseen	8/24/23 21:58	ايش دخل الدفع عن طريق فاتورة الجوال بتحميل التطبيق؟؟؟				en	sa	App Store	8/24/23 21:58				fransimobile	Very bad, slow, and currently not allowing login and requesting GPS access. Even after opening it, the same problem still appears. I deleted the app to download it again, but it's not downloading and requesting an update and sufficient payment to continue using mobile phone billing. What does the payment through mobile phone billing have to do with downloading the app??? I hope the technical issu…	ar	bad slow currently allow login request gps access even open problem still appear delete app download download request update sufficient payment continue use mobile phone bill payment mobile phone bill download app hope technical issue app resolve soon possible	Negative	1	1	1
App Store	dfce2bac-7e69-4090-8210-0338d745f5af	Turki1123	8/22/23 20:54	افشل تطبيق بنكي				en	sa	App Store	8/22/23 20:54				fransimobile	Wins the worst financial experience.	ar	win bad financial experience	Negative	1	0	0
App Store	430f85b0-3f98-4884-bbf0-60aa0eab5773	kx.3z	8/23/23 11:24	خيبه				en	sa	App Store	8/23/23 11:24				fransimobile	Honestly, it used to be one of the best banking applications and it was easy to use. However, recently it started to malfunction, it freezes and doesn't allow logging in. You have disappointed me, French. ðð»	ar	honestly use one best bank applications easy use however recently start malfunction freeze doesnt allow log disappoint french	Negative	1	1	1
App Store	59fa86a4-25d4-48bc-abab-d0c0e7966946	yars19	8/22/23 13:27	تطبيق معقد				en	sa	App Store	8/22/23 13:27				fransimobile	Bad application, it messed me up. I had an emergency transfer and it kept kicking me out and insisting on turning on the GPS.	ar	bad application mess emergency transfer keep kick insist turn gps	Negative	1	1	0
App Store	7691838e-6bf4-436e-acba-40f95b76fd5d	Ray2023mkk	8/21/23 8:38	اسوأ تجربة بنكية رقمية				en	sa	App Store	8/21/23 8:38				fransimobile	Slow speed, constant lagging, and lack of development.	ar	slow speed constant lag lack development	Negative	1	0	1
App Store	1dda1888-465a-4a85-8de4-c8b1ca2ad7e8	أحد عملاء البنك	8/21/23 8:07	الرياض				en	sa	App Store	8/21/23 8:07				fransimobile	The application "French Mobile" is very bad. It has many flaws compared to other bank applications. It is extremely slow, logging in is complicated, it frequently hangs, and it is very difficult to reach technical support. I hope that the application will be reconsidered and developed to keep up with the technological advancements that our country, which holds an advanced international position, …	ar	application french mobile bad many flaw compare bank applications extremely slow log complicate frequently hang difficult reach technical support hope application reconsider develop keep technological advancements country hold advance international position experience	Negative	1	1	1
App Store	44d85f40-16eb-4f12-ae16-2a81f449d02e	mohcdxnk	8/20/23 18:17	سيء				en	sa	App Store	8/20/23 18:17				fransimobile	"By God, the bank is sterile and their electronic services are sterile. It has been a week and I am unable to transfer or do any transactions."	ar	god bank sterile electronic service sterile week unable transfer transactions	Negative	1	1	0
App Store	82640068-2a73-4bf9-a66d-defa1d5ee18f	ابو البيلسان	8/20/23 8:51	برنامج جدا سئ كلمة سئ قليل فيه				en	sa	App Store	8/20/23 8:51				fransimobile	A very bad program, the word 'bad' is an understatement for it	ar	bad program word bad understatement	Negative	1	0	0
App Store	74299498-6717-494b-a732-9d56a4bcbd33	zaibak88	8/19/23 18:57	تطبيق بطيء جدا				en	sa	App Store	8/19/23 18:57				fransimobile	The application is very, very, very slow in processing and sending messages. Please work on improving the app's services.	ar	application slow process send message please work improve apps service	Negative	0	0	1
App Store	e8df2cb7-8b20-4f2b-b380-6c63888103b4	F٦	8/11/23 7:38	اسوء تطبيق بنك بتاريخ البشرية				en	sa	App Store	8/11/23 7:38				fransimobile	I swear to Allah, this is one of the worst applications. Very slow response, something that you can finish with other bank applications in one minute takes 10 minutes with this application. Very slow response, if there were less than one star, I would give it to you, by Allah.	ar	swear allah one bad applications slow response something finish bank applications one minute take minutes application slow response less one star would give allah	Negative	1	0	1
App Store	cfa238cc-5df3-40d4-bd7e-9dd1546b28eb	abdullah alhebaishi	8/4/23 11:06	Very slow				en	sa	App Store	8/4/23 11:06				fransimobile	The worst banking application I have ever used. Banks are advancing and evolving their applications, while the French are living in a different world. It is slow, laggy, and its services are extremely weak. It does not provide all the information needed. There are no signs of any development to solve the problem. When I complained to a customer service representative, they replied that their appl…	ar	bad bank application ever use bank advance evolve applications french live different world slow laggy service extremely weak provide information need sign development solve problem complain customer service representative reply application actually excellent like monkey claim mother deer	Negative	1	0	1
App Store	ebd96b5e-d760-4b63-b7ca-d2bcc417946c	Abdulmajed alsayed	7/31/23 8:20	سعودي فرنسي				en	sa	App Store	7/31/23 8:20				fransimobile	The local transfer is constantly on hold, and this is not the first time. Honestly, I hope this issue is resolved. Thank you.	ar	local transfer constantly hold first time honestly hope issue resolve thank	Negative	0	0	0
App Store	d6ada0fb-b401-46f7-9bbb-9528824e36a9	Dwoudy	8/1/23 14:42	ارجو حل مشكلة slowness				en	sa	App Store	8/1/23 14:42				fransimobile	With the latest updates, the application has become very slow... Please solve the problem of slowness as this affects the banking experience.	ar	late update application become slow please solve problem slowness affect bank experience	Negative	0	0	1
App Store	6f46dd9e-eaed-4837-a6b5-5e40691c80ee	Abdulaziz althunayan	7/24/23 16:31	عدم حل المشكله				en	sa	App Store	7/24/23 16:31				fransimobile	The application doesn't let me in, and I submitted a request a month ago, but still facing the same problem.	ar	application doesnt let submit request month ago still face problem	Negative	0	1	0
App Store	bc0a91e9-cb33-4fdb-8339-089ba6d60b13	bbbiu7	7/21/23 10:55	بخصوص سوء التطبيق				en	sa	App Store	7/21/23 10:55				fransimobile	The worst experience you can have is opening an account with this bank. The app is very bad, slow, and laggy. The problem is that many people are suffering from it, and the bank seems unaware of it. ðð»	ar	bad experience open account bank app bad slow laggy problem many people suffer bank seem unaware	Negative	1	0	1
App Store	d4b31e29-6967-4187-bfbf-6d39598cfc4b	Ajsg121212	7/13/23 0:59	تطبيق شيء للغاية				en	sa	App Store	7/13/23 0:59				fransimobile	One of the worst banking applications is notorious for its extreme slowness, and the bank has not made any efforts to improve it like other banks, despite the repeated complaints about this miserable application.	ar	one bad bank applications notorious extreme slowness bank make efforts improve like bank despite repeat complaints miserable application	Negative	1	0	1
App Store	4aa1d6aa-591b-4b8d-a621-347d7f545157	سعود بن حسين	7/5/23 13:41	تقيم				en	sa	App Store	7/5/23 13:41				fransimobile	"Worst program in history... Its style is very old and extremely slow."	ar	bad program history style old extremely slow	Negative	1	0	1
App Store	f685fe75-b293-4ccd-b0cf-28d6d2cf2b99	شاهد نواف	7/1/23 2:39	التطبيق سيء				en	sa	App Store	7/1/23 2:39				fransimobile	The worst thing application	ar	bad thing application	Negative	1	0	0
App Store	a5f4ba05-a03e-4657-82a5-802590ec72f5	ygcpoi	6/29/23 15:08	بنك الفرنسى				en	sa	App Store	6/29/23 15:08				fransimobile	Very bad bank	ar	bad bank	Negative	1	0	0
App Store	578e9f11-1994-48e4-bc83-4cb1d4c24ab3	M-United	6/27/23 17:39	تطبيق يجيب المرض وبطيئ جداً				en	sa	App Store	6/27/23 17:39				fransimobile	"An app that makes you sick and is very slow	ar	app make sick slow	Negative	1	0	1
App Store	72aa5ca0-1455-46ad-88d6-27f5f6b94b93	watn-w	6/28/23 4:09	جيد لكن بطئ بالتصفح				en	sa	App Store	6/28/23 4:09				fransimobile	I hope it is developed and becomes smoother to use because it is slow to navigate from one field to another. I also hope to have the option to withdraw money if I don't have a card, and to request financing through the application and complete the data through the application, like other banks.	ar	hope develop become smooth use slow navigate one field another also hope option withdraw money dont card request finance application complete data application like bank	Positive	1	0	1
App Store	9bb33a98-94ff-425f-939c-42fec7ed6b2d	_1HmoD	6/27/23 10:23	The worst app				en	sa	App Store	6/27/23 10:23				fransimobile	The application makes you feel like you're begging for your money.	ar	application make feel like youre beg money	Negative	1	0	0
App Store	1b7f9b7d-5ccf-4dd1-b1a5-beb29f2af219	fahad241563	6/26/23 8:38	بطىء وتعليق				en	sa	App Store	6/26/23 8:38				fransimobile	Slow and lagging. Needs constant updates and more attention.	ar	slow lag need constant update attention	Negative	0	0	1
App Store	4658de2b-8694-4e58-a45c-a790b093e224	Samsama	6/20/23 3:06	تطبيق بطيء غير متطور				en	sa	App Store	6/20/23 3:06				fransimobile	It doesn't compare to Al Rajhi or even Ahli or Investment, the application has many comments and wastes the client's time significantly.	ar	doesnt compare al rajhi even ahli investment application many comment waste clients time significantly	Negative	1	0	1
App Store	64315ce8-b3c8-4797-8998-f0d6fc98bb86	تطبيق ممتاز في كوبونات	6/17/23 0:10	السعودية				en	sa	App Store	6/17/23 0:10				fransimobile	The application is extremely problematic outside the Kingdom of Saudi Arabia. If you don't have another account in other banks, you will face difficulties with activation messages not being received. Additionally, it hangs in an annoying manner.	ar	application extremely problematic outside kingdom saudi arabia dont another account bank face difficulties activation message receive additionally hang annoy manner	Negative	1	1	1
App Store	924a4b8d-73e4-44df-949a-dc1be5c72d32	bandar2244	6/15/23 11:24	البرنامج دائم يعلق				en	sa	App Store	6/15/23 11:24				fransimobile	The program always hangs	ar	program always hang	Negative	0	0	1
App Store	5f45e960-cf89-47ef-9fc9-eef18dfdb3af	فنان ام تطبيق	6/11/23 2:03	التطبيق ثقيل جداً				en	sa	App Store	6/11/23 2:03				fransimobile	The application is very slow.	ar	application slow	Negative	0	0	1
App Store	0ef9113d-280c-4f9b-a771-07581809c6e6	nanooooosh	4/27/23 14:25	التطبيق سيء				en	sa	App Store	4/27/23 14:25				fransimobile	When are you planning to improve the quality and usability of the application? I can't even add anyone for transfer, and even the quick login service doesn't work properly. I hope you will be more responsive to the issues in the application.	ar	plan improve quality usability application cant even add anyone transfer even quick login service doesnt work properly hope responsive issue application	Negative	0	1	0
App Store	081ce802-d660-4355-9f7a-2f93804df723	noood.	6/10/23 13:22	برنامج فرنسي موبايل				en	sa	App Store	6/10/23 13:22				fransimobile	The worst banking program I have used, it does not have any updates or improvements.	ar	bad bank program use update improvements	Negative	1	0	0
App Store	b1373aa0-5857-4a1c-bd4f-6df920c8260c	muatz bamarhool	6/6/23 16:23	جائزة اسوء و ابطىء برنامج				en	sa	App Store	6/6/23 16:23				fransimobile	After the last update, the program has an unusual amount of slowness. Sometimes I have to log in multiple times until the program understands and sends the login code. To make a transfer, it takes at least a quarter of an hour due to the slow responsiveness of the program. To pay with a Visa, I have to close the program and open it multiple times. Waiting for the new update... If the situation co…	ar	last update program unusual amount slowness sometimes log multiple time program understand send login code make transfer take least quarter hour due slow responsiveness program pay visa close program open multiple time wait new update situation continue swear god close entire account bank	Negative	1	1	1
App Store	d04942c7-420d-4c18-9fc4-36293f1578f1	Karim elganayni	6/4/23 5:43	😡				en	sa	App Store	6/4/23 5:43				fransimobile	The worst banking application I have ever used, it has greatly affected my life.	ar	bad bank application ever use greatly affect life	Negative	1	0	0
App Store	1b38348e-1afc-49ce-b07e-3be4ef8e0cef	ابونواف المالكي	6/2/23 11:02	تطبيق بطي ويحتاج الى تطوير للواجهة وللخيارات				en	sa	App Store	6/2/23 11:02				fransimobile	The bill after the transfer	ar	bill transfer	Negative	0	1	0
App Store	30866e39-6f9e-486f-be44-ce5f7d6e812b	محمد٠٠٠٠٠٠٠٠٠٠٠٠٠٠٠	6/2/23 10:34	فاشل				en	sa	App Store	6/2/23 10:34				fransimobile	"All banking applications are failures, meaning that they are all unsuccessful in every sense of the word. The problems with the application are countless, and the entire bank is a failure. I will now proceed to withdraw all my funds from this cursed bank."	ar	bank applications failures mean unsuccessful every sense word problems application countless entire bank failure proceed withdraw fund curse bank	Negative	1	1	0
App Store	11739612-f2a8-4aa4-84d0-61825efd2564	Abdalah Alharthe	6/2/23 9:12	التطبيق سيء وبطيء بشكل فضيع	{'id': 20620447, 'body': 'Dear customer, \r\nWe are sorry to hear that and we are working to improve and improve our services and products.\r\nYour satisfaction is our main goal\r\n', 'modified': '2021-01-25T07:06:39Z'}			en	sa	App Store	6/2/23 9:12	{'id': 20620447, 'body': 'Dear customer, \r\nWe are sorry to hear that and we are working to improve and improve our services and products.\r\nYour satisfaction is our main goal\r\n', 'modified': '2021-01-25T07:06:39Z'}			fransimobile	Very very very bad and very very slow application. I will change the bank because of your application.	ar	bad slow application change bank application	Negative	1	0	1
App Store	96c4e7a0-583c-4c9e-89ff-551e15aec91c	Bu hala	5/26/23 17:26	لعنكم الله ولا وفقكم ولا بارك فيكم				en	sa	App Store	5/26/23 17:26				fransimobile	The worst bank, the worst application, a rotten conglomerate, may God curse you, the angels, and all people.	ar	bad bank bad application rotten conglomerate may god curse angels people	Negative	1	0	0
App Store	10bf42a7-3892-4293-b344-389b1e72fee1	ابوسعود عدنان	5/26/23 15:25	محمد				en	sa	App Store	5/26/23 15:25				fransimobile	The application is good, but it is extremely slow and frustrating ð	ar	application good extremely slow frustrate	Negative	1	0	1
App Store	1f2bca3d-0f89-4698-8ad5-ea7f508c4f54	kemoaljoniz	5/25/23 18:23	ء				en	sa	App Store	5/25/23 18:23				fransimobile	Bad application... very slow and always freezing.	ar	bad application slow always freeze	Negative	1	0	1
App Store	7532394c-df57-4d57-8207-10e069cdb13e	زيادz3	5/15/23 8:36	طبيق سيئ				en	sa	App Store	5/15/23 8:36				fransimobile	I have used the worst application ever.	ar	use bad application ever	Negative	1	0	0
App Store	0dc9eb21-91a5-4fc0-abf2-6000f082a0e5	عبدالاله عبدالدايم	5/7/23 10:10	حداثة التطبيق				en	sa	App Store	5/7/23 10:10				fransimobile	The application is very slow in transition and is lacking many updates. I hope more effort and work is put into it. Compare yourselves with Al Rajhi application and you will notice many differences. I hope the IT department works more on this application, especially in this digital age.	ar	application slow transition lack many update hope effort work put compare al rajhi application notice many differences hope department work application especially digital age	Negative	1	1	1
App Store	30b18ea2-e182-4daf-8c7c-ff967c95255d	Kareem844	4/4/23 22:26	الطبيق بطيء وسيء جدا مقارنة مع البنوك الأخرى				en	sa	App Store	4/4/23 22:26				fransimobile	The application is very bad.	ar	application bad	Negative	1	0	0
App Store	06ef265c-410d-4829-a068-8365e213bc3e	Rasheed2222	4/24/23 9:35	اخرى بنك				en	sa	App Store	4/24/23 9:35				fransimobile	The worst banking application I have ever come across in my life. It is a shame.	ar	bad bank application ever come across life shame	Negative	1	0	0
App Store	bd0ec09b-f41e-412f-8c0f-7a01143506f4	Abu Jouhar🖤✨.	4/16/23 18:49	فاتورة مابعد التحويل				en	sa	App Store	4/16/23 18:49				fransimobile	I hope that you add the feature of sending and storing an invoice by converting it to PDF format, and also copying the invoice as a physical guide that can be printed.	ar	hope add feature send store invoice convert pdf format also copy invoice physical guide print	Neutral	0	1	0
App Store	bc5cb3e6-ae09-4b81-bd83-86926bf0a2ce	Alsaad Thana	3/27/23 14:46	سيء جداً				en	sa	App Store	3/27/23 14:46				fransimobile	I don't understand why he keeps asking me to activate my electronic account every time! I always get worried and want to log in, but in the end, he acts foolishly and says your account is in French, your mobile is inactive, which means it's not worth your time. This situation keeps happening to me every month. I wish you could see how bad this application is. Even Ahli Bank, which is considered p…	ar	dont understand keep ask activate electronic account every time always get worry want log end act foolishly say account french mobile inactive mean worth time situation keep happen every month wish could see bad application even ahli bank consider primitive fast term login doesnt require repeat activation	Negative	1	1	0
App Store	d2145528-59d6-4c30-8182-114ea9352556	ماجد 6666	3/26/23 22:57	برنامج فاشل				en	sa	App Store	3/26/23 22:57				fransimobile	There is no final interest in the program and no interest in the customer.	ar	final interest program interest customer	Negative	1	0	0
App Store	8408591e-3ab3-4788-a15b-1eefcb3768ee	راشد السعيدان	3/25/23 23:35	من افشل البرامج بيطي و التحويل فيه سي جدنن				en	sa	App Store	3/25/23 23:35				fransimobile	One of the worst programs is "Beeti wa Altahweel" as it is extremely boring.	ar	one bad program beeti wa altahweel extremely bore	Negative	1	0	0
App Store	a39cbab5-c593-47c0-91dc-6377bdaffcbe	Srro	3/6/23 22:47	سيء جدا				en	sa	App Store	3/6/23 22:47				fransimobile	Can you improve your application? Try using the Al Rajhi and Al Ahli application and see how excellent these applications are. We want to do business with your bank and avail your services, so please try the application as there seems to be a glitch in almost everything and it hangs most of the time. Your budget is excellent, so please utilize it for improvement.	ar	improve application try use al rajhi al ahli application see excellent applications want business bank avail service please try application seem glitch almost everything hang time budget excellent please utilize improvement	Positive	1	1	0
App Store	c6ded003-be38-46f0-8164-bba5e23e9c99	MontherG	3/2/23 12:03	تطبيق فاشل				en	sa	App Store	3/2/23 12:03				fransimobile	The bank application is a failure every time I try to log in. It asks me to add a device, and when I press "add device," it gives me a message saying that I have exceeded the maximum number of devices and I need to delete one. When I delete a device, it logs me out, and I have to log in again and then add the device. It then tells me to wait for a verification call, and it's up to luck whether th…	ar	bank application failure every time try log ask add device press add device give message say exceed maximum number devices need delete one delete device log log add device tell wait verification call luck whether call come access account problem keep occur every time try log	Negative	0	1	0
App Store	e4d31623-f7d2-43bb-9955-878da7ddcdfd	ahmednagadi	3/1/23 21:10	مشكله في الدخول على الحساب				en	sa	App Store	3/1/23 21:10				fransimobile	I have a problem accessing my account via the French mobile app. It used to work better before, but unfortunately, I have been facing this issue for three days and it is still ongoing. It's strange because the services of the French bank are excellent except for the application. Please look into this issue.	ar	problem access account via french mobile app use work good unfortunately face issue three days still ongoing strange service french bank excellent except application please look issue	Negative	1	1	0
App Store	9882ec69-b7ff-4981-992f-e3e1429afb83	great hashem	3/1/23 15:27	التطبيق لا يعمل				en	sa	App Store	3/1/23 15:27				fransimobile	The application is not working and a text message is received for login, but the application is not working.	ar	application work text message receive login application work	Negative	0	1	0
App Store	9fe9cbff-9b52-480a-b321-23068df3d9ad	ابوباااااااسل	3/1/23 14:51	بقالة الفرنسي				en	sa	App Store	3/1/23 14:51				fransimobile	It is supposed to be called "Baqala al-Faransi" (The French Grocery Store) and not "Al-Bank al-Faransi" (The French Bank) because it is the worst bank in terms of service and the availability of branches and ATMs. It is a very bad bank.	ar	suppose call baqala alfaransi french grocery store albank alfaransi french bank bad bank term service availability branch atms bad bank	Negative	1	0	0
App Store	b95c5fa6-85eb-4af8-8be6-5c513e99e164	H.007	2/27/23 12:30	يحتاج تحديث شامل				en	sa	App Store	2/27/23 12:30				fransimobile	The program is very slow and not updated, and it needs a comprehensive update.	ar	program slow update need comprehensive update	Negative	1	0	1
App Store	6381f3fd-3258-454e-b3b1-00186180d877	abduulrhman abdulaziz	2/27/23 10:34	التطبيق سيئ للغاية				en	sa	App Store	2/27/23 10:34				fransimobile	You deserve less than one star in terms of application functionality and phone service, God willing. I will resolve my issue with you and leave the terrible bank. God has blessed us with many advanced and respectful banks that care about developing their employees and applications.	ar	deserve less one star term application functionality phone service god will resolve issue leave terrible bank god bless us many advance respectful bank care develop employees applications	Negative	1	0	0
App Store	c2cf8811-8942-4598-83d0-09d3d4a5cd6b	Helal2u	2/25/23 12:35	تطبيق البنك ضعيييف				en	sa	App Store	2/25/23 12:35				fransimobile	The bank's application is very weak compared to all the other banks that I have dealt with.	ar	bank application weak compare bank deal	Negative	1	0	0
App Store	6c390506-67cc-4109-b37d-40872b1beaa5	محمد بن سعود	2/10/23 17:36	من اسوأ تطبيقات البنوك				en	sa	App Store	2/10/23 17:36				fransimobile	A slow and laggy application that keeps crashing. What are they even doing? Learn from other banks how to make better applications.	ar	slow laggy application keep crash even learn bank make good applications	Negative	1	1	1
App Store	3667f63a-9881-461e-b141-4eaa0a53fcd8	فاااااشل جداً بشكل غير معقول	2/6/23 12:01	تطبيق سيئ جداً				en	sa	App Store	2/6/23 12:01				fransimobile	Very, very bad application	ar	bad application	Negative	1	0	0
App Store	5c143ba1-e0c6-4bf8-abf6-059f80be84ff	The8Others	2/7/23 5:56	مشكلة توثيق الجهاز				en	sa	App Store	2/7/23 5:56				fransimobile	I have two accounts in the bank, and every time I try to login to any of them, the system asks for device authentication again (it should only require device authentication once, not every time). Please solve this problem.	ar	two account bank every time try login system ask device authentication require device authentication every time please solve problem	Negative	0	1	0
App Store	9903942a-ecf2-4d0d-8903-adce4f9234a0	mohamed F. A	1/31/23 6:05	سلحفاء				en	sa	App Store	1/31/23 6:05				fransimobile	In the name of Allah, Mashallah, the application is downloaded like a turtle.	ar	name allah mashallah application download like turtle	Positive	1	1	0
App Store	af9ea53f-bd02-47b0-8639-42c94c100121	يحيى غزواني	1/26/23 0:52	الرياض				en	sa	App Store	1/26/23 0:52				fransimobile	Not recommended for quick infiltration and slow response after infiltration. ððððð	ar	recommend quick infiltration slow response infiltration	Negative	1	0	1
App Store	1b4fe31f-df49-432f-a2c8-d4a1db588b98	7amad102	1/24/23 18:23	نجمه كثيره عليكم				en	sa	App Store	1/24/23 18:23				fransimobile	Failed program, no one told me about you except for Al-Rajhi loans, may Allah honor it.	ar	fail program one tell except alrajhi loan may allah honor	Negative	1	1	0
App Store	cd52fb2d-05ab-4bac-99ec-cb54cc5df84d	Majed Abdallah	1/1/23 11:46	الاسوء على الاطلاق				en	sa	App Store	1/1/23 11:46				fransimobile	What is the benefit of an application or online services that do not allow access to the account and account management by the account owner? The worst customer experience for a bank ever in this bank. The mistake that should be corrected as soon as possible, God willing.	ar	benefit application online service allow access account account management account owner bad customer experience bank ever bank mistake correct soon possible god will	Negative	1	1	0
App Store	c71a3a33-cf23-484e-96c8-efb3eac4e38c	ahmedsss21	1/24/23 2:30	الأفضل				en	sa	App Store	1/24/23 2:30				fransimobile	One of the best banks I have dealt with.	ar	one best bank deal	Positive	0	0	0
App Store	cb78253d-074c-45e7-a76c-159a286614d9	الامكمبيبهمنرز	12/19/22 16:28	السعودية				en	sa	App Store	12/19/22 16:28				fransimobile	The online application is very, very bad - slow and unclear throughout the year and from multiple cities and countries. Your application remains the worst and most complicated application.	ar	online application bad slow unclear throughout year multiple cities countries application remain bad complicate application	Negative	1	0	1
App Store	131cca61-f5f2-48b3-821a-b1aa0932907d	اسمي مايهمك	12/18/22 16:04	👎🏼👎🏼👎🏼👎🏼				en	sa	App Store	12/18/22 16:04				fransimobile	The worst bank and the stupid one who thinks of opening an account in it.	ar	bad bank stupid one think open account	Negative	1	0	0
App Store	7cbc9d0c-bb73-47f7-83e8-2b8cab097c0a	طاطططط بيرو	12/18/22 15:57	مشكله دليل المستخدم				en	sa	App Store	12/18/22 15:57				fransimobile	It's not fair; when I open the program, the user manual appears and when I press exit, unfortunately, it gets stuck on the exit page.	ar	fair open program user manual appear press exit unfortunately get stick exit page	Negative	0	1	1
App Store	dbac2a23-e241-40ab-93f0-83c0801d9a70	زمهر	12/11/22 17:02	فااااااشل				en	sa	App Store	12/11/22 17:02				fransimobile	"We have the honor of experiencing your pathetic application. Otherwise, we would be forced to change banks because of your failed application that always bothers us when we need to make urgent transfers. It never opens for us, and it's really frustrating."	ar	honor experience pathetic application otherwise would force change bank fail application always bother us need make urgent transfer never open us really frustrate	Negative	1	1	0
App Store	5be338e2-f2f5-4df1-8f8b-6172da98a0ac	AsMa 🖤	12/9/22 22:17	افشل تطبيق				en	sa	App Store	12/9/22 22:17				fransimobile	Unfortunately, the application is very ineffective and slow in executing commands. It fails to update properly, which is not suitable for the reputation and position of the bank.	ar	unfortunately application ineffective slow execute command fail update properly suitable reputation position bank	Negative	1	1	1
App Store	94ab56e0-98d5-4bf2-96b2-2e920323191c	حيادي رقم ١	11/7/22 11:42	كثرة الاعطال				en	sa	App Store	11/7/22 11:42				fransimobile	Unfortunately, this application is believed to be the worst among banking applications due to its frequent crashes and the difficulty of conducting transactions through it.	ar	unfortunately application believe bad among bank applications due frequent crash difficulty conduct transactions	Negative	1	1	0
App Store	aebae4a9-e4bc-451b-aa69-e1b395d46179	power9911	12/8/22 13:05	سي جدا 👎👎👎				en	sa	App Store	12/8/22 13:05				fransimobile	The application does not open very slowly and after waiting, it says the operation failed. Please take care of the application, I cannot access my account. ððððð	ar	application open slowly wait say operation fail please take care application access account	Negative	0	1	1
App Store	522acd9f-effc-4a79-9522-56112f8b068d	Samo91@	12/7/22 13:57	التطبيق سيء				en	sa	App Store	12/7/22 13:57				fransimobile	The application is going from bad to worse. I don't know what happened to you. Where were you before and where are you now? The code hasn't been delivered to the mobile for two weeks. It hangs and keeps hanging even when you're inside. The recent operations don't show up. What's left? Except for visiting the branch, there is only one employee at each branch!!!	ar	application go bad bad dont know happen code hasnt deliver mobile two weeks hang keep hang even youre inside recent operations dont show whats leave except visit branch one employee branch	Negative	1	1	1
App Store	73058aff-3cd6-44b9-8b1e-45b9e4067547	Sahar NICKNAME:)	12/6/22 21:16	لا يعمل				en	sa	App Store	12/6/22 21:16				fransimobile	Unfortunately, he has not been working at all for a week. ð	ar	unfortunately work week	Negative	1	1	0
App Store	b4938714-1cbd-4463-96d3-4b6e8bc5e694	Zuzu1zuzu	12/5/22 21:47	بنك متهالك				en	sa	App Store	12/5/22 21:47				fransimobile	Slow and backward services, poor responsiveness, and regressive. Simply put, a bank with no future that will undoubtedly perish with this weak and declining performance.	ar	slow backward service poor responsiveness regressive simply put bank future undoubtedly perish weak decline performance	Negative	1	0	1
App Store	481396e4-6601-4be6-9ec0-621e6f0867fa	inoori94	12/5/22 12:19	نور				en	sa	App Store	12/5/22 12:19				fransimobile	Very bad, please update it.	ar	bad please update	Negative	1	0	0
App Store	9533e958-0ab8-42ff-ae2f-83409468e85b	ash7440	12/3/22 7:58	سيء				en	sa	App Store	12/3/22 7:58				fransimobile	Worse than bad, it is an official application from an official entity! It is heavy, slow, and every time I open it from the same phone, it tells me it's a different device and I have to confirm it!	ar	bad bad official application official entity heavy slow every time open phone tell different device confirm	Negative	1	0	1
App Store	4e878999-2c84-4a63-ac32-30073b92c0d9	bandar 435	11/30/22 9:10	تطبيق الفرنسي				en	sa	App Store	11/30/22 9:10				fransimobile	The application took me back for a few days until I could access the bank's services with internet cards.	ar	application take back days could access bank service internet card	Neutral	0	1	1
App Store	86bc3a51-2e3b-41b9-93e4-0982eecf8601	AsdAsd3500	11/29/22 16:12	سئ جدا				en	sa	App Store	11/29/22 16:12				fransimobile	The application is not good and very very very bad.	ar	application good bad	Negative	1	0	0
App Store	9ebdb51e-9ed7-4044-9fce-a1a0e038e7b6	rajaa_em	11/27/22 12:46	👎🏼👎🏼				en	sa	App Store	11/27/22 12:46				fransimobile	The application is very slow. I hope you find a solution as it frequently hangs. It becomes frustrating when you are in a hurry to transfer and the application runs at a snail's pace.	ar	application slow hope find solution frequently hang become frustrate hurry transfer application run snail pace	Negative	1	0	1
App Store	44250c54-a357-4db9-89aa-894be54e9408	OmarAldul	11/27/22 7:50	بطيء جداً، وسيء جداً.				en	sa	App Store	11/27/22 7:50				fransimobile	The application is very slow, unresponsive, and full of many errors.	ar	application slow unresponsive full many errors	Negative	0	1	1
App Store	5e0a1e9f-282a-499f-8a91-780f6d0c5e7b	ارحما كبار السن	11/27/22 2:31	القاهره				en	sa	App Store	11/27/22 2:31				fransimobile	The verification code arrives late after the specified time has expired. Please solve this problem so that we can pay the bills, especially while we are out of the country. Device recognition is very annoying because the codes are always changing. Remove this feature and speed up the verification code as it used to be.	ar	verification code arrive late specify time expire please solve problem pay bill especially country device recognition annoy cod always change remove feature speed verification code use	Negative	1	1	0
App Store	dd9bb45e-44de-4edf-bd6e-687104da92c0	abdulmohsen332	11/22/22 22:30	بطيء جدا				en	sa	App Store	11/22/22 22:30				fransimobile	Very annoyingly slow.	ar	annoyingly slow	Negative	1	0	1
App Store	071d27a1-1d99-499c-b3d3-40cd73b3d11c	M-Ghitas	11/18/22 9:35	التطبيق فيه مشكلة مع ايفون ١٤				en	sa	App Store	11/18/22 9:35				fransimobile	It does not work properly and always shuts down. You must regularly update it.	ar	work properly always shut must regularly update	Negative	0	1	0
App Store	a270006f-6128-4143-98cd-81c0b916dcde	divinghs	11/11/22 19:22	مشكله بالبرنامج				en	sa	App Store	11/11/22 19:22				fransimobile	It's frustrating that one cannot access their account even after entering the password and waiting for the encryption message, which doesn't arrive for several days. The program is in its worst state.	ar	frustrate one access account even enter password wait encryption message doesnt arrive several days program bad state	Negative	1	1	0
App Store	f3ce3639-3aa4-4576-ad8b-fc593976bc65	Faisal.Alayoubi	11/8/22 8:10	Worse than I thought				en	sa	App Store	11/8/22 8:10				fransimobile	The worst bank I dealt with.. Hopefully, international banks will enter Saudi Arabia and we will finally be free from worry.	ar	bad bank deal hopefully international bank enter saudi arabia finally free worry	Negative	1	0	0
App Store	ef9cc03d-2a3c-4e39-b9d7-c949bcdc737a	دنيا عجيبه	11/7/22 18:53	سيئ				en	sa	App Store	11/7/22 18:53				fransimobile	The application is extremely, extremely, extremely bad. It freezes horribly; it's sick and needs treatment. It doesn't even deserve a single star.	ar	application extremely extremely extremely bad freeze horribly sick need treatment doesnt even deserve single star	Negative	1	0	1
App Store	eb3b6992-1981-4af9-9c53-eec47d6b99ff	Attieh	11/6/22 7:28	بطى التطبيق				en	sa	App Store	11/6/22 7:28				fransimobile	The app is slow	ar	app slow	Negative	0	0	1
App Store	e1fe366d-3e05-4854-abc8-de1cb5485554	ابو فهد عبدالعزيز مهيب	11/5/22 15:26	استخدام التطبيق				en	sa	App Store	11/5/22 15:26				fransimobile	The worst electronic application for banks.	ar	bad electronic application bank	Negative	1	0	0
App Store	427cbb9d-e28c-4b54-895b-885005313eaf	Aseel_Dh	11/3/22 10:22	سيء				en	sa	App Store	11/3/22 10:22				fransimobile	Unbearably slow!	ar	unbearably slow	Negative	0	0	1
App Store	c2b01ebc-d9cc-40a0-9338-7dedd0c9602f	n_1420	10/15/22 15:53	-				en	sa	App Store	10/15/22 15:53				fransimobile	I have been with the French (person) for 6 years, and since that time there has been no progress in the application and everything about it has only gotten worse and slower. ð	ar	french person years since time progress application everything get bad slow	Negative	1	0	1
App Store	2e5cccb5-3f0c-4d1c-aecd-24a32e0a792b	مأزق	10/27/22 13:15	والله بنك مره كويس				en	sa	App Store	10/27/22 13:15				fransimobile	And Allah is a very good bank.	ar	allah good bank	Positive	0	0	0
App Store	c6552124-3b8a-4610-8634-e348a1d8b673	م501	10/26/22 10:59	تطبيق سيء				en	sa	App Store	10/26/22 10:59				fransimobile	The worst application in the kingdom, very very slow, no one should ever use it. Advice: I spent half an hour trying to convert to a beneficiary, but his name does not appear in my records. And when I try to add him again, it tells me that the beneficiary is already added. Very bad, very bad, very bad.	ar	bad application kingdom slow one ever use advice spend half hour try convert beneficiary name appear record try add tell beneficiary already add bad bad bad	Negative	1	1	1
App Store	74c464c6-edf3-445f-8a83-6fd020621f94	wale88ed	10/22/22 17:00	تطبيق وبنك غير جيد. بإذن الله الاحد بنتقل لبنك اخر				en	sa	App Store	10/22/22 17:00				fransimobile	In addition to the ongoing flaws of the application, there is another issue where the application requires mobile verification in order to use it. Mobile verification requires a bank card, unfortunately, people do not carry their cards with them anymore.	ar	addition ongoing flaw application another issue application require mobile verification order use mobile verification require bank card unfortunately people carry card anymore	Negative	1	1	0
App Store	4c9c3528-b3cf-4306-9694-af433483132e	ks am alsein	10/21/22 18:35	ممتاز				en	sa	App Store	10/21/22 18:35				fransimobile	"And by Allah, the best bank in terms of services, and may Allah bless you all."	ar	allah best bank term service may allah bless	Positive	0	0	0
App Store	75ebf91e-ebb9-4e9f-8612-82b0a4ba7266	KHALID1992	10/18/22 15:30	ًخالد				en	sa	App Store	10/18/22 15:30				fransimobile	There is a problem with logging in through the application or electronic channels. I couldn't log in and a message appeared stating that the beneficiary needs to activate the mobile banking. However, it wasn't helpful. What's wrong with you? You used to be the first to find solutions!	ar	problem log application electronic channel couldnt log message appear state beneficiary need activate mobile bank however wasnt helpful whats wrong use first find solutions	Negative	0	1	0
App Store	79ede7a1-53f2-4c21-92c7-0b811d069953	Super sos	10/17/22 13:36	اسوء برنامج مصرفي				en	sa	App Store	10/17/22 13:36				fransimobile	The worst banking program.	ar	bad bank program	Negative	1	0	0
App Store	be1e832f-fefb-459c-b915-77eb85bdae61	Khalid91nz1	10/12/22 10:47	أسوأ بنك وتطبيق				en	sa	App Store	10/12/22 10:47				fransimobile	For those seeking the worst bank, there is a solution... The French bank is one of the worst banks with the worst applications, competing with the Ahli Bank in both poor services and poor application. Advice for anyone interested in this bank: you have better alternatives than it.	ar	seek bad bank solution french bank one bad bank bad applications compete ahli bank poor service poor application advice anyone interest bank good alternatives	Negative	1	0	0
App Store	b4a70a2b-061c-42b6-b888-25da9500e2b7	bemohammed	10/1/22 1:07	معلق				en	sa	App Store	10/1/22 1:07				fransimobile	The application has been hanging since last month and if it opens, it is very slow. Before that, it was excellent.	ar	application hang since last month open slow excellent	Negative	1	0	1
App Store	a6854cda-2089-4ffc-9498-d29a9907deb5	المستشار الإداري	9/25/22 20:30	تطبيق بطيء جداً				en	sa	App Store	9/25/22 20:30				fransimobile	A very slow app	ar	slow app	Negative	0	0	1
App Store	adb436ed-d1de-4a2d-a316-c26732e790c1	reefccccccccccc	9/22/22 1:26	كل يوم وثاني تحديث وكل تحديث يخليه اخس وابطئ				en	sa	App Store	9/22/22 1:26				fransimobile	Every day there is another update, and every update makes it thinner and slower.	ar	every day another update every update make thin slow	Negative	1	0	1
App Store	dd85db5c-2ee1-48b2-a2a8-6698cd2c118e	يسلام الله على دار السعودية	9/24/22 4:32	تطبيق ممتاز جداً وسهل استخدامه في المعاملات المالية والتحويلات				en	sa	App Store	9/24/22 4:32				fransimobile	An excellent and very easy-to-use application for financial transactions and transfers.	ar	excellent easytouse application financial transactions transfer	Positive	0	0	0
App Store	5992c126-6852-4a01-a161-7ad899a036f8	f_silmy	9/21/22 20:09	تعليق بالتطبيق				en	sa	App Store	9/21/22 20:09				fransimobile	The application is not working.	ar	application work	Negative	0	1	0
App Store	165ab829-4182-42ed-abb0-d7af44fc8f5a	Nefer Pharaoh	9/21/22 9:22	لا يعمل بصوره جيده				en	sa	App Store	9/21/22 9:22				fransimobile	The application is unstable and constantly fails to accept operations. In addition, the font in the application is not suitable for good visibility. Unfortunately, it is one of the least efficient applications among Saudi banks' applications.	ar	application unstable constantly fail accept operations addition font application suitable good visibility unfortunately one least efficient applications among saudi bank applications	Negative	1	1	1
App Store	72d2e83d-3b82-4c0f-b91f-e27b7072a38e	Rakooni7	9/20/22 7:27	تطبيق يفتقر لاقل معايير خدمة العميل				en	sa	App Store	9/20/22 7:27				fransimobile	I waited for five minutes and didn't receive the code to open the application! I'm stuck, unable to access the application! The problem has been going on for five months, and every time I think they will solve it, I'm surprised to find it getting worse day after day. InshaAllah, I will transfer my salary to another bank that values its customers and provides them with the best technological capab…	ar	wait five minutes didnt receive code open application im stick unable access application problem go five months every time think solve im surprise find get bad day day inshaallah transfer salary another bank value customers provide best technological capabilities ease use zero rat deserve thoroughly rightfully	Negative	1	1	1
App Store	6fc07f72-f46e-4904-86d1-6bee852f4dca	Pb8ddgls	9/19/22 11:39	تطبيق فاشل				en	sa	App Store	9/19/22 11:39				fransimobile	Now with hypocrisy and lying	ar	hypocrisy lie	Negative	1	0	0
App Store	85896ad2-28e0-450c-8887-867e2af9eb23	Hhayam22	9/5/22 12:32	التطبيق يعلق كثير ومايفتح وحالته حاله شوفوا حل للموضوع				en	sa	App Store	9/5/22 12:32				fransimobile	Find a solution to the issue. The application doesn't open, and there are many comments expressing frustration about the delays in transactions.	ar	find solution issue application doesnt open many comment express frustration delay transactions	Negative	0	0	1
App Store	06e6e8cd-381b-40de-b355-b72e3253c9b4	ABDULAZIZBADER21	9/1/22 7:50	اللغه				en	sa	App Store	9/1/22 7:50				fransimobile	The language used to be a choice of changing the language, but now it is all English.	ar	language use choice change language english	Neutral	1	1	0
App Store	49619025-c2f9-4591-ac56-1654bda7476d	muhammd126	8/31/22 17:54	تعليق وتاخير				en	sa	App Store	8/31/22 17:54				fransimobile	The application is slow and freezes a lot. There are many steps involved in the conversion. ðð»	ar	application slow freeze lot many step involve conversion	Negative	1	0	1
App Store	cad11dcc-61a6-4c0c-8e52-ddfae45de1e8	zainab...ali....❤️	8/31/22 16:10	فيه خلل				en	sa	App Store	8/31/22 16:10				fransimobile	Today is the date August 31, 2022. I'm trying to open the application, but it doesn't open. I keep trying, but it remains frozen.	ar	today date august im try open application doesnt open keep try remain freeze	Negative	0	1	1
App Store	9dd99090-031e-4df7-b1a1-7bade9c55cf4	shafeere	10/10/22 7:30	Unable to login				en	sa	App Store	10/10/22 7:30				fransimobile	I try all the way to log in but always slow respond & not login.pls fix this bug asap	en	try way log always slow respond loginpls fix bug asap	Negative	0	1	1
App Store	b154e766-5958-47da-b3ae-ece7ad7fbd1a	نون هونو	8/29/22 17:34	سيء بجداره				en	sa	App Store	8/29/22 17:34				fransimobile	One of the worst banking applications. Unfortunately, I don't benefit from the application at all. The application is slow and ultimately unresponsive, kicking me out of the page. I try to contact customer service, but no one answers. My work has been disrupted for a week. If there was an option for less than a star, I would've chosen it.	ar	one bad bank applications unfortunately dont benefit application application slow ultimately unresponsive kick page try contact customer service one answer work disrupt week option less star wouldve choose	Negative	1	1	1
App Store	f0cd3760-3f95-443a-8065-f0b63956d5d4	gzhdkfjfjfk	8/26/22 13:16	يحتاج تحسين وتطوير				en	sa	App Store	8/26/22 13:16				fransimobile	Slow and hangs a lot.	ar	slow hang lot	Negative	0	0	1
App Store	aa1e5d7f-3838-40c7-bcd4-55f57f34dd0d	Abdullah_Shahine	8/24/22 9:16	مشكلة				en	sa	App Store	8/24/22 9:16				fransimobile	I cannot log in, it is stuck on the homepage.	ar	log stick homepage	Negative	0	1	1
App Store	af08230a-16da-41b7-a365-0f3fcf6e3945	تلتفد لتلزع	8/13/22 23:00	تطبيق فاشل				en	sa	App Store	8/13/22 23:00				fransimobile	Slow and freezes, and if you have a problem with the application, technical support raises a request for you, but then there is no solution!	ar	slow freeze problem application technical support raise request solution	Negative	0	1	1
App Store	7497e5ad-4a28-4f92-98c5-6bbea78aa27e	Alkahteeri الكثيري	8/7/22 11:38	Auful app تطبيق ردىء جدا				en	sa	App Store	8/7/22 11:38				fransimobile	The latest update is considered a downgrade, as it reduces the features to the worst. Now, every time you are asked to enter the username and password instead of saving the username, even if you enable the feature, it doesn't work. Therefore, I give it one star, which is too much. I think the bank needs a managerial overhaul after being an example of quality and strength.	ar	late update consider downgrade reduce feature bad every time ask enter username password instead save username even enable feature doesnt work therefore give one star much think bank need managerial overhaul example quality strength	Negative	1	1	0
App Store	e618c0c0-0c83-4c43-8631-b7f87e14eb22	Etoon2007	8/3/22 10:00	اسوء تطبيق من البنوك				en	sa	App Store	8/3/22 10:00				fransimobile	The application is very bad, very slow. I'm thinking of changing the bank because of the application.	ar	application bad slow im think change bank application	Negative	1	0	1
App Store	a1d55929-c446-4ce7-84b0-42a4e25b9406	desertman3000	8/2/22 21:25	تطبيقكم لايوجد بصمة الوجهة ودايما يعلق تطبيق سى ارجو تطوير تطبيقكم شوفو تطبيق الاهلى مظبوط				en	sa	App Store	8/2/22 21:25				fransimobile	The application is not well-developed at all, it lacks essential features. It does not have facial recognition and it frequently freezes and has issues.	ar	application welldeveloped lack essential feature facial recognition frequently freeze issue	Negative	1	1	1
App Store	7d61deb3-f79d-4cad-a4a9-7e819bf47e58	noaimies	7/31/22 21:15	تطبيق فاشل جداً				en	sa	App Store	7/31/22 21:15				fransimobile	Unfortunately, the new update cannot download the credit card statement in PDF format. When requesting the account statement, the message "No PDF file available for this month" appears.	ar	unfortunately new update download credit card statement pdf format request account statement message pdf file available month appear	Negative	1	1	0
App Store	05c7ba1f-e7c2-4d11-9f2a-0050d439284e	moghdv	7/27/22 10:21	يعلق				en	sa	App Store	7/27/22 10:21				fransimobile	Very, very slow.	ar	slow	Negative	0	0	1
App Store	450d960e-44df-459b-85ed-2c481336c371	ام ليينوو٢٠١٠	12/10/22 5:23	ارجوا التعديل				en	sa	App Store	12/10/22 5:23				fransimobile	Modern transactions are done through banking applications, but the French bank application is the only one that is delayed in sending the code!! The message arrives after the specified time has ended, and we repeat the attempt hundreds of times without success!! When will this issue be rectified!!!!!!	ar	modern transactions do bank applications french bank application one delay send code message arrive specify time end repeat attempt hundreds time without success issue rectify	Negative	0	0	1
App Store	b16d9fd4-04c6-4990-955e-659c443e367b	النشاررر	9/24/22 22:04	بطيييييييييييييييئ جدًا جدًا جدًا جدًا جدًا				en	sa	App Store	9/24/22 22:04				fransimobile	Very, very, very, very, very slow.	ar	slow	Negative	0	0	1
App Store	3ad3c0c0-ef40-4657-ac2f-53d11083d22d	Bu٥٠	9/22/22 7:04	اسوء تطبيق لبنك سعودي				en	sa	App Store	9/22/22 7:04				fransimobile	Very slowwwww.	ar	slowwwww	Negative	0	0	1
App Store	8b35c669-df30-4dee-9ad3-f2ff04427ade	Abdullah m'''''	6/29/23 23:22	SLOW APP				en	sa	App Store	6/29/23 23:22				fransimobile	Very slow app compared to other banks apps.Fransi Bank must change their app to from the scratch and build new one.Itâs really reflecting on the bank services.	en	slow app compare bank appsfransi bank must change app scratch build new oneits really reflect bank service	Negative	1	0	1
App Store	8bac7933-d5e1-4107-a714-8f9edfba1729	abdulrahman1001	10/27/22 6:21	Terrible app				en	sa	App Store	10/27/22 6:21				fransimobile	Says that the password is wrong?? While i use it on the web app and its not wrong anymore, fix your damn app	en	say password wrong use web app wrong anymore fix damn app	Negative	0	1	0
App Store	c1c44ee5-96b4-4250-b953-993c16b83b06	hopamp	4/1/22 11:08	ماصار يشتغل				en	sa	App Store	4/1/22 11:08				fransimobile	The program is faulty, full of errors, and does not work. The bank has recently reached its worst state. I do not know the reasons, but attention must be given to the management and decision-makers if they have an impact. Goodbye, from a customer who has been with you for 25 years. I recommend switching to another bank.	ar	program faulty full errors work bank recently reach bad state know reason attention must give management decisionmakers impact goodbye customer years recommend switch another bank	Negative	1	1	0
App Store	4bf42c9e-29f6-42dc-96cc-0a007e4f79d6	Ali AlMusalam	2/23/22 23:03	أتمنى أن يتم إصلاح الأخطاء في التحديث الأخير				en	sa	App Store	2/23/22 23:03				fransimobile	I had hoped for promotion for the better, especially since we suffer greatly from the poor banking services through the application, including, but not limited to: 1- Failure to process transfers without providing any error or reason reference number. 2- Extreme slowness and sometimes the account statement does not appear in the application. 3- Sometimes there is no name for the entity that deduc…	ar	hop promotion good especially since suffer greatly poor bank service application include limit failure process transfer without provide error reason reference number extreme slowness sometimes account statement appear application sometimes name entity deduct amount verification message delay hind access application observations late update	Negative	1	1	1
App Store	39e87929-62c2-48d7-9733-b50e41294f13	DrBMQ	7/4/22 10:08	اتصال التحقق الجديد لم يفتح معنا لفرنسي موبايل				en	sa	App Store	7/4/22 10:08				fransimobile	Dear management of the French Bank, May God bless you, Unfortunately, the new verification call service did not help us in opening the French Mobile application. It gives me the following message: "One-time password has expired." Please contact me as soon as possible, as I am currently outside of Saudi Arabia on vacation with my family. This vacation has been affected by this inconvenience caused…	ar	dear management french bank may god bless unfortunately new verification call service help us open french mobile application give follow message onetime password expire please contact soon possible currently outside saudi arabia vacation family vacation affect inconvenience cause verification call service suppose text message like customer enter verification icon french mobile application perform…	Negative	1	1	0
App Store	e0b70c9c-beb0-4045-8b18-b4081ab7c13e	العميل ابوثامر	4/22/22 20:08	التحديث غير جيد				en	sa	App Store	4/22/22 20:08				fransimobile	The system has been updated and now it does not open. I have tried several times without success.	ar	system update open try several time without success	Negative	0	1	0
App Store	85eed25f-477f-4e81-99ee-3ee5a5b10224	7ussaino	7/1/22 9:38	Sfl				en	sa	App Store	7/1/22 9:38				fransimobile	The application is not working and it is not allowing me to create an account. ðð	ar	application work allow create account	Negative	0	1	0
App Store	9bfb523d-9c2f-44c4-84ce-4598d6a05fc0	تطبيق لا يعلى عليه شامل كل شي	5/26/22 2:15	ابها				en	sa	App Store	5/26/22 2:15				fransimobile	I hope to develop the application because it has a lot of errors.	ar	hope develop application lot errors	Negative	1	1	0
App Store	3385aa1d-95aa-4d44-a2f2-8edf7670dae5	A.D.128	5/23/22 9:21	لا يعمل !!				en	sa	App Store	5/23/22 9:21				fransimobile	It doesn't work after the latest update on the iPad! And since then, the problem hasn't been resolved! A respectable bank that respects its customers cannot follow such a path! The application deserves zero stars.	ar	doesnt work late update ipad since problem hasnt resolve respectable bank respect customers follow path application deserve zero star	Negative	1	1	0
App Store	3dcc4a2c-104c-4baf-ace7-e160d59bee7f	دحون	4/30/22 16:51	سيئ				en	sa	App Store	4/30/22 16:51				fransimobile	The program freezes and has slow response, and I don't recommend using it. It is better to use the browser, at least it is faster in response.	ar	program freeze slow response dont recommend use good use browser least fast response	Negative	0	0	1
App Store	234d2810-7949-45f2-8aec-051fd9717acf	صالح٩٠٠٠٠	4/27/22 1:05	البرنامج بطي				en	sa	App Store	4/27/22 1:05				fransimobile	Yahweh, find a solution for your application after the slow update, it's slower than a turtle. It's not possible that the 4G network is full, and yet it takes me 15 minutes to complete two transfers. It's like living in the dark ages.	ar	yahweh find solution application slow update slow turtle possible g network full yet take minutes complete two transfer like live dark age	Negative	1	0	1
App Store	4f05a86b-8d47-41bf-b868-35a5288e9d9f	Alnagah Almtoastah	4/26/22 16:25	التطبيق لايعمل الان				en	sa	App Store	4/26/22 16:25				fransimobile	After the latest update, you cannot log in to the application. Please solve the problem quickly.	ar	late update log application please solve problem quickly	Negative	0	1	0
App Store	b868ff9c-bb14-4563-a87c-d4013734f40d	wafa0009998888	4/25/22 11:32	البرنامج ما يشتغل ويطلب مني شراء ؟!!!!				en	sa	App Store	4/25/22 11:32				fransimobile	It does not work.	ar	work	Negative	0	1	0
App Store	2d036a09-c3ed-486e-a450-c64e005c995b	Haitham76	4/24/22 1:44	مكة المكرمة				en	sa	App Store	4/24/22 1:44				fransimobile	The application is not working after the latest update. Additionally, the application does not support landscape mode like most banking applications. Please pay more attention and update with all that is new.	ar	application work late update additionally application support landscape mode like bank applications please pay attention update new	Negative	0	1	0
App Store	2fbbaca4-17c0-4545-92d9-963c565085e0	Abadi2444400000	4/23/22 18:29	ليس مجاني				en	sa	App Store	4/23/22 18:29				fransimobile	The program, after the last update, has become paid and no longer free. I don't care about your program or your bank. I will transfer my salary to Al Rajhi Bank instead.	ar	program last update become pay long free dont care program bank transfer salary al rajhi bank instead	Negative	0	1	0
App Store	0e0ce9f8-f966-4a3a-b828-1aef46399887	basilbasilbasil	4/22/22 20:23	سيء				en	sa	App Store	4/22/22 20:23				fransimobile	The program is very slow. It constantly freezes. The verification message arrives late or may not arrive at all. After the new update, the account cannot be opened. The in-app access services are bad. Very slow. It constantly freezes. Very slow.	ar	program slow constantly freeze verification message arrive late may arrive new update account open inapp access service bad slow constantly freeze slow	Negative	1	0	1
App Store	51dd5516-9824-4876-bb35-75e12effe1b6	fqdat	4/22/22 20:02	نجمة كثيره عليهم هم وتحديثاتهم الزباله				en	sa	App Store	4/22/22 20:02				fransimobile	Stupid program	ar	stupid program	Negative	1	0	0
App Store	a153dbb4-d935-4b38-ac04-d87095fdf6b0	مذيخر	4/22/22 15:53	لايكمنني الدخول				en	sa	App Store	4/22/22 15:53				fransimobile	The application has been updated but I cannot log in. When I enter the password, a screen appears asking for another update.	ar	application update log enter password screen appear ask another update	Negative	0	1	0
App Store	eb96dd1c-29c1-4a4c-8496-4644b98df7b3	Hanadesigner	4/22/22 13:48	فاشل.. خصوصا تحديث رمضان عطلني				en	sa	App Store	4/22/22 13:48				fransimobile	Bad application.. It has many frequent problems and it is slow.	ar	bad application many frequent problems slow	Negative	1	1	1
App Store	420e0def-d0db-4b32-9ac8-b9ece2a275ba	bader yahya	1/23/22 17:32	لا تسوي التحديث الاخير				en	sa	App Store	1/23/22 17:32				fransimobile	It was working fine after the update, but they had a system error, and now you can't use the application.	ar	work fine update system error cant use application	Negative	0	1	0
App Store	5be8fa49-28aa-4107-9da3-e6ed95216d85	almuraa	4/22/22 8:40	الشرقية				en	sa	App Store	4/22/22 8:40				fransimobile	I have a problem after the update. I am unable to log into my account. It asks me to download the latest version, even though I have already updated. Please solve the problem as soon as possible. Thank you.	ar	problem update unable log account ask download late version even though already update please solve problem soon possible thank	Negative	0	1	0
App Store	c1ab74ad-a978-4717-ad62-ec429324b722	ثامر ezi	4/22/22 7:20	مشكله في البرنامج				en	sa	App Store	4/22/22 7:20				fransimobile	Why is the new update not opening the app?	ar	new update open app	Negative	0	1	0
App Store	3bfdbcc6-9f51-4e76-ad8b-cfbfd914676b	🚨⚠️	4/22/22 0:51	التحديث لايعمل				en	sa	App Store	4/22/22 0:51				fransimobile	The update is not functioning. We kindly request you to fix the problem urgently.	ar	update function kindly request fix problem urgently	Negative	0	1	0
App Store	e3ece7fa-82d7-4315-9a55-1f10850a5b48	جججججراد	4/21/22 19:29	جنوب السعوديه				en	sa	App Store	4/21/22 19:29				fransimobile	The program asked me for an update and I updated it, but now it doesn't open for me. I kindly request a reply as soon as possible.	ar	program ask update update doesnt open kindly request reply soon possible	Negative	0	1	0
App Store	07b0f2ba-313a-4f17-88ed-9c521c72a708	Jaber Alasmari	3/25/22 10:16	تحديث تاريخ الهوية				en	sa	App Store	3/25/22 10:16				fransimobile	You cannot update the ID date in the program.	ar	update id date program	Neutral	0	1	0
App Store	c719d2b0-2fa9-4b77-9930-64d02aa66b29	amgad_1	3/4/22 17:48	سئ				en	sa	App Store	3/4/22 17:48				fransimobile	The program is suspended indefinitely.	ar	program suspend indefinitely	Negative	0	0	1
App Store	b7fc3dbc-2343-425f-a3eb-2722ea631b95	Sosooo me	2/24/22 13:34	تطبيق معقد				en	sa	App Store	2/24/22 13:34				fransimobile	The application is difficult to use, especially in transactions. That's why I transferred my account to another bank.	ar	application difficult use especially transactions thats transfer account another bank	Negative	1	1	0
App Store	1c9eea96-7232-4ef5-b84a-cbfc5422b053	fozalhamad	2/9/22 6:48	مادري				en	sa	App Store	2/9/22 6:48				fransimobile	Now, because its name is the French bank, all the comments are in English and how do I understand the replies ð­ð­ð­ What do you want from me? May God bring Nasser's wrath upon you.	ar	name french bank comment english understand reply want may god bring nassers wrath upon	Negative	1	0	0
App Store	7564fe2e-2129-42a1-ba33-ae90f5c6018b	Abu jubran	2/5/22 1:13	Not good				en	sa	App Store	2/5/22 1:13				fransimobile	The previous version was more stable, especially regarding authentication through the quick login code. It was not working properly, and the code was automatically cancelled after the first login, preventing re-entry.	ar	previous version stable especially regard authentication quick login code work properly code automatically cancel first login prevent reentry	Negative	0	1	0
App Store	bf35b985-216e-43a1-8f68-d613a1434833	Crazy____________[[____	1/30/22 22:58	Saudalqhtani				en	sa	App Store	1/30/22 22:58				fransimobile	Good ð Very well. But its only downside is that it doesn't have a dark mode feature.	ar	good well downside doesnt dark mode feature	Negative	1	0	0
App Store	ee56797c-0fb9-429e-a484-8e6150d77def	batooessa	1/28/22 20:48	ا				en	sa	App Store	1/28/22 20:48				fransimobile	Very bad, the worst banking application among all banks. It is slow and always asking for user activation since I downloaded it. It only worked once, very bad. If there was a negative rating, I would give it.	ar	bad bad bank application among bank slow always ask user activation since download work bad negative rat would give	Negative	1	1	1
App Store	da8280f8-bdd6-4196-a698-b4f46e539285	اااااههه666	1/22/22 21:08	مايفتح معي التطبيق لا يوجد تحديث				en	sa	App Store	1/22/22 21:08				fransimobile	The application doesn't open for me, there are no updates	ar	application doesnt open update	Negative	0	1	0
App Store	1f83725d-64c1-4922-bab8-9c0afd874708	oydlyxktzotzkk	1/20/22 3:29	تطبيق فاشل				en	sa	App Store	1/20/22 3:29				fransimobile	One of the most complicated and unsuccessful programs in organizing and managing entries. We thank you for this extremely unsuccessful program.	ar	one complicate unsuccessful program organize manage entries thank extremely unsuccessful program	Negative	1	1	0
App Store	debdbba8-9cd8-442f-b673-dbb91d9a669b	اضافات بدون تصليح	1/11/22 16:20	جيد لكن !				en	sa	App Store	1/11/22 16:20				fransimobile	The conversion is very complex. When converting, the beneficiaries must be shown directly without a lot of complex options. This makes it difficult for me as a technician and expert to find the beneficiary.	ar	conversion complex convert beneficiaries must show directly without lot complex options make difficult technician expert find beneficiary	Negative	1	1	0
App Store	6da92130-15cb-47ec-bcb0-22b2d32e6d3a	md kaif khan	2/2/22 10:46	Md Kaif khan				en	sa	App Store	2/2/22 10:46				fransimobile	Itâs the little good overall.	en	little good overall	Positive	1	0	0
App Store	e011db67-0237-44d8-9c45-da60e201717c	وهم9	2/2/22 1:13	سيئ				en	sa	App Store	2/2/22 1:13				fransimobile	He is unreliable and bad ââââââââ	ar	unreliable bad	Negative	1	0	0
App Store	5279501d-8806-488f-bc62-82374b89f999	asb.50	9/20/22 5:25	A				en	us	App Store	9/20/22 5:25				fransimobile	vert very slow app always crushing	en	vert slow app always crush	Negative	1	0	1
App Store	42950f32-bdd8-41f0-903f-afb44dfa6a4f	iMEiD	8/2/23 15:02	Not even a single star !	{'id': 38084039, 'body': 'Dear customer, We are sorry to hear that and we are working to improve and improve our services and products. Your satisfaction is our main goal', 'modified': '2023-08-03T20:52:54Z'}			en	us	App Store	8/2/23 15:02	{'id': 38084039, 'body': 'Dear customer, We are sorry to hear that and we are working to improve and improve our services and products. Your satisfaction is our main goal', 'modified': '2023-08-03T20:52:54Z'}			fransimobile	The worst banking application ever, just show that you care about it and wake up we are in 2023 almost 2024 bring a good team to build a new application that costumer can use!	en	bad bank application ever show care wake almost bring good team build new application costumer use	Negative	1	0	1
App Store	b8cc2350-cc76-4a2d-89b2-d28faf188cb0	Evan Hater	6/21/23 4:11	Can’t transfer to Local Banks	{'id': 37272414, 'body': 'Dear, Kindly contact: 8001242121 to better assist you. \nThanks, have a good day ', 'modified': '2023-06-22T13:15:41Z'}			en	us	App Store	6/21/23 4:11	{'id': 37272414, 'body': 'Dear, Kindly contact: 8001242121 to better assist you. \nThanks, have a good day ', 'modified': '2023-06-22T13:15:41Z'}			fransimobile	The Local Banks Transfer Page DOESNâT load on iPhones.	en	local bank transfer page doesnt load iphones	Negative	0	1	0
App Store	1a829549-e2c4-4d3d-b777-489d258a3e65	Ahmed I e	5/30/23 21:16	I do not recommend	{'id': 36861866, 'body': 'Dear customer, \r\nWe are sorry to hear that and we are working to improve and improve our services and products.\r\nYour satisfaction is our main goal\r\n', 'modified': '2023-06-01T09:39:04Z'}			en	us	App Store	5/30/23 21:16	{'id': 36861866, 'body': 'Dear customer, \r\nWe are sorry to hear that and we are working to improve and improve our services and products.\r\nYour satisfaction is our main goal\r\n', 'modified': '2023-06-01T09:39:04Z'}			fransimobile	Awful Bank services dump App., I do not recommend.	en	awful bank service dump app recommend	Negative	1	0	0
App Store	379c4466-e2ec-40dc-92f9-22836af6cc32	Waleed khd	6/14/23 19:57	Bad app not amazed.	{'id': 37182290, 'body': 'Dear client, We are sorry to read that and we are working to improve our services and products. Your satisfaction is our main goal', 'modified': '2023-06-18T08:25:36Z'}			en	us	App Store	6/14/23 19:57	{'id': 37182290, 'body': 'Dear client, We are sorry to read that and we are working to improve our services and products. Your satisfaction is our main goal', 'modified': '2023-06-18T08:25:36Z'}			fransimobile	A bank cannot afford a well functioning app. What a joke!	en	bank afford well function app joke	Negative	1	0	0
App Store	3ccaefda-b5f1-47e4-9a4d-050824c427d3	seasam2014	5/30/23 6:53	Not good	{'id': 36850207, 'body': 'Dear customer, We are sorry to hear that and we are working to improve and improve our services and products.\nYour satisfaction is our main goal', 'modified': '2023-05-31T19:13:13Z'}			en	us	App Store	5/30/23 6:53	{'id': 36850207, 'body': 'Dear customer, We are sorry to hear that and we are working to improve and improve our services and products.\nYour satisfaction is our main goal', 'modified': '2023-05-31T19:13:13Z'}			fransimobile	The worst experience unfortunately Verrrrrrrry slow	en	bad experience unfortunately verrrrrrrry slow	Negative	1	0	1
App Store	182f4b18-308e-4033-8231-6998178877bf	azoz salem	7/28/22 10:38	The worst app ever				en	us	App Store	7/28/22 10:38				fransimobile	The worst app ever	en	bad app ever	Negative	1	0	0
App Store	3087daa2-75a6-43c0-b354-12464784d5ee	iKhal3d	5/17/22 22:26	Broken App. Does not work lately.				en	us	App Store	5/17/22 22:26				fransimobile	This application is out of commission , thereâs no use for it to be in my devices for now. Please spend some effort on fixing it, developing it and redesign it. For it to reflect the name of the bank. Thanks.	en	application commission theres use devices please spend effort fix develop redesign reflect name bank thank	Negative	1	0	0
App Store	6735d92f-3251-41b8-bb86-209cd22c1415	Hotsunnyday01	5/21/22 22:54	Worst app Bank don’t care to fix it				en	us	App Store	5/21/22 22:54				fransimobile	Since Ramadan App donât works on iPad will not bring the login page , repot it to bank , but seems bank doesnât care to fix it	en	since ramadan app dont work ipad bring login page repot bank seem bank doesnt care fix	Negative	0	1	0
App Store	dec35261-9e58-4af9-b192-103dae88a99a	Fatimahkh	4/22/22 11:24	Does not work				en	us	App Store	4/22/22 11:24				fransimobile	Worst application, it always crushes, and the updates never got improved	en	bad application always crush update never get improve	Negative	1	0	1
App Store	5e42c7c2-2987-491d-8a2a-e93750a43176	علي بن منيع	1/3/22 21:46	I can’t sign in				en	us	App Store	1/3/22 21:46				fransimobile	It keeps telling me that the system has an issue and I may try later.	en	keep tell system issue may try late	Negative	0	1	0
App Store	ba400ba1-a621-4d7c-b07f-0eea3f82c1da	MHamli	4/22/22 16:44	Latest Update For Ramadan Version				en	us	App Store	4/22/22 16:44				fransimobile	The app is not working and it directs me to the App Store for an update but it is already updated!	en	app work direct app store update already update	Negative	0	1	0
App Store	d477e99d-b1d6-4211-8812-42975a13c4c2	zuhairjasem77	4/22/22 20:21	App is not working properly				en	us	App Store	4/22/22 20:21				fransimobile	app is not working properly	en	app work properly	Negative	0	1	0
App Store	3ec5bb3b-1c0d-461f-ae76-cb7573bf9615	Alrajhi.66	4/14/22 19:56	NOT WORKING				en	us	App Store	4/14/22 19:56				fransimobile	Not working!!! What a shame, the app not working. I can not login to my account.	en	work shame app work login account	Negative	1	1	0
App Store	f97d4fd6-3516-4ec8-bee6-1dff43a71be3	toni montana	4/21/22 19:44	can’t signs in at all.				en	us	App Store	4/21/22 19:44				fransimobile	canât signs in at all, the app keeps asking to update to latest version again.	en	cant sign app keep ask update late version	Negative	0	1	0
App Store	c88ce454-884d-405c-ad93-6c2b48555b19	Munther93	2/15/23 15:32	Very slow				en	us	App Store	2/15/23 15:32				fransimobile	The application is very very very slow. It raises the pressure.	ar	application slow raise pressure	Negative	1	0	1
App Store	30fdb109-682e-4ce8-b132-5647f9d99117	aldossaru	7/30/23 5:01	التطبيق سيئ	{'id': 38084032, 'body': 'عزيزي العميل, يؤسفنا سماع ذلك ونعمل جاهدين على تحسين وتطوير خدماتنا ومنتجاتنا. رضاكم غايتنا', 'modified': '2023-08-03T20:52:23Z'}			en	us	App Store	7/30/23 5:01	{'id': 38084032, 'body': 'Ø¹Ø²ÙØ²Ù Ø§ÙØ¹Ù ÙÙ, ÙØ¤Ø³ÙÙØ§ Ø³Ù Ø§Ø¹ Ø°ÙÙ ÙÙØ¹Ù Ù Ø¬Ø§ÙØ¯ÙÙ Ø¹ÙÙ ØªØ­Ø³ÙÙ ÙØªØ·ÙÙØ± Ø®Ø¯Ù Ø§ØªÙØ§ ÙÙ ÙØªØ¬Ø§ØªÙØ§. Ø±Ø¶Ø§ÙÙ ØºØ§ÙØªÙØ§', 'modified': '2023-08-03T20:52:23Z'}			fransimobile	In need of much development. Very bad, I hope the technical support will look into its matter.	ar	need much development bad hope technical support look matter	Negative	1	0	0
App Store	e566ab18-3e73-4a22-87c4-216cf8fd01f9	jabri888	7/20/23 9:30	عميل قديم	{'id': 37874049, 'body': 'عزيزي العميل, يؤسفنا سماع ذلك ونعمل جاهدين على تحسين وتطوير خدماتنا ومنتجاتنا. رضاكم غايتنا', 'modified': '2023-07-24T18:41:12Z'}			en	us	App Store	7/20/23 9:30	{'id': 37874049, 'body': 'Ø¹Ø²ÙØ²Ù Ø§ÙØ¹Ù ÙÙ, ÙØ¤Ø³ÙÙØ§ Ø³Ù Ø§Ø¹ Ø°ÙÙ ÙÙØ¹Ù Ù Ø¬Ø§ÙØ¯ÙÙ Ø¹ÙÙ ØªØ­Ø³ÙÙ ÙØªØ·ÙÙØ± Ø®Ø¯Ù Ø§ØªÙØ§ ÙÙ ÙØªØ¬Ø§ØªÙØ§. Ø±Ø¶Ø§ÙÙ ØºØ§ÙØªÙØ§', 'modified': '2023-07-24T18:41:12Z'}			fransimobile	Unfortunately, the bank did not keep up with the progress that has occurred in electronic banking services in Saudi banks. The application is inefficient, and this is the reason why many customers are turning to other banks.	ar	unfortunately bank keep progress occur electronic bank service saudi bank application inefficient reason many customers turn bank	Negative	1	0	0
App Store	55fb782b-676c-437c-8630-56a1d167f6b3	AhmedKaifi	4/24/23 10:28	بطي، قديم، سيء	{'id': 36190203, 'body': 'عزيزي العميل, يؤسفنا سماع ذلك ونعمل جاهدين على تحسين وتطوير خدماتنا ومنتجاتنا.\r\nرضاكم غايتنا', 'modified': '2023-04-26T19:46:37Z'}			en	us	App Store	4/24/23 10:28	{'id': 36190203, 'body': 'Ø¹Ø²ÙØ²Ù Ø§ÙØ¹Ù ÙÙ, ÙØ¤Ø³ÙÙØ§ Ø³Ù Ø§Ø¹ Ø°ÙÙ ÙÙØ¹Ù Ù Ø¬Ø§ÙØ¯ÙÙ Ø¹ÙÙ ØªØ­Ø³ÙÙ ÙØªØ·ÙÙØ± Ø®Ø¯Ù Ø§ØªÙØ§ ÙÙ ÙØªØ¬Ø§ØªÙØ§.\r\nØ±Ø¶Ø§ÙÙ ØºØ§ÙØªÙØ§', 'modified': '2023-04-26T19:46:37Z'}			fransimobile	The application is not completely developed. Please take a look at the other banking applications (Al-Ahli, Al-Rajhi). You are still living in 2010.	ar	application completely develop please take look bank applications alahli alrajhi still live	Negative	1	0	0
App Store	2ce12b9e-7daf-4c79-85d9-eba9d0e1cf69	Aa11223344_	4/10/23 14:29	من اسؤا ما يكون	{'id': 35912043, 'body': 'عزيزي العميل, \r\nيؤسفنا سماع ذلك و نعمل جاهدا على تحسين و تطوير خدماتنا و منتجاتنا.\r\nرضاكم هي غايتنا. \r\n', 'modified': '2023-04-12T10:28:58Z'}			en	us	App Store	4/10/23 14:29	{'id': 35912043, 'body': 'Ø¹Ø²ÙØ²Ù Ø§ÙØ¹Ù ÙÙ, \r\nÙØ¤Ø³ÙÙØ§ Ø³Ù Ø§Ø¹ Ø°ÙÙ Ù ÙØ¹Ù Ù Ø¬Ø§ÙØ¯Ø§ Ø¹ÙÙ ØªØ­Ø³ÙÙ Ù ØªØ·ÙÙØ± Ø®Ø¯Ù Ø§ØªÙØ§ Ù Ù ÙØªØ¬Ø§ØªÙØ§.\r\nØ±Ø¶Ø§ÙÙ ÙÙ ØºØ§ÙØªÙØ§. \r\n', 'modified': '2023-04-12T10:28:58Z'}			fransimobile	Very slow and his existence is like being nonexistent.	ar	slow existence like nonexistent	Negative	0	0	1
App Store	0ff21067-ef3e-45be-a769-a409ad3bf0ec	6arra7	3/2/23 7:25	اسوء تطبيق بنك في السعودية	{'id': 35740715, 'body': 'عزيزي العميل، يؤسفنا سماع ذلك و نعمل جاهدين على تحسين و تطوير خدماتنا و منتجاتنا.\r\nرضاكم غايتنا', 'modified': '2023-04-03T12:16:44Z'}			en	us	App Store	3/2/23 7:25	{'id': 35740715, 'body': 'Ø¹Ø²ÙØ²Ù Ø§ÙØ¹Ù ÙÙØ ÙØ¤Ø³ÙÙØ§ Ø³Ù Ø§Ø¹ Ø°ÙÙ Ù ÙØ¹Ù Ù Ø¬Ø§ÙØ¯ÙÙ Ø¹ÙÙ ØªØ­Ø³ÙÙ Ù ØªØ·ÙÙØ± Ø®Ø¯Ù Ø§ØªÙØ§ Ù Ù ÙØªØ¬Ø§ØªÙØ§.\r\nØ±Ø¶Ø§ÙÙ ØºØ§ÙØªÙØ§', 'modified': '2023-04-03T12:16:44Z'}			fransimobile	All banks in Saudi Arabia have beautiful and smooth customer applications, but the French bank's application is the worst among them.	ar	bank saudi arabia beautiful smooth customer applications french bank application bad among	Negative	1	0	0
App Store	1624ba60-aa8a-49ec-972d-c28c0efde3f3	انسانة	2/27/23 16:58	Bad				en	us	App Store	2/27/23 16:58				fransimobile	Very slow very bad very stupid	en	slow bad stupid	Negative	1	0	1
App Store	b7e06ee4-2d6c-402a-aa56-8e864ee91f46	Turki A A	2/27/23 8:44	تطبيق فرنسي موبايل				en	us	App Store	2/27/23 8:44				fransimobile	The worst banking application among all applications. It is always slow and freezes.	ar	bad bank application among applications always slow freeze	Negative	1	0	1
App Store	3d6386d9-557a-4afa-9f46-b01b5530c03f	الله يعيننا	2/11/23 10:06	سيء				en	us	App Store	2/11/23 10:06				fransimobile	Your application is bad, the only reason I keep using it is because of the salary.	ar	application bad reason keep use salary	Negative	1	1	0
App Store	490af505-c55a-451d-a306-f8ecad548d77	Abol fors	12/28/22 15:15	تطبيق سيء جداً لا يليق بسمعة البنك ⚠️⚠️⚠️				en	us	App Store	12/28/22 15:15				fransimobile	A very bad application that does not befit the bank's reputation â ï¸â ï¸â ï¸	ar	bad application befit bank reputation	Negative	1	0	0
App Store	769b03c5-c9b8-4a10-b2ea-e39389a35c83	fmswufco	8/31/22 18:06	سئ جدًا				en	us	App Store	8/31/22 18:06				fransimobile	The application crashes and raises blood pressure, it freezes and has many issues. If I wanted to transfer, I went to the branch. If I go to the bank, I withdraw for myself.	ar	application crash raise blood pressure freeze many issue want transfer go branch go bank withdraw	Negative	1	1	1
App Store	9b60d664-54b7-4af5-9380-570b7117d95c	B-JJ	9/9/22 11:34	Good				en	us	App Store	9/9/22 11:34				fransimobile	The latest update is very nice.	ar	late update nice	Positive	0	0	0
App Store	95d5e45f-a071-49d9-ac2a-860ed8137051	mhd4gooner	8/20/22 15:49	سيء جدا نجمه وحده كثيره عليه				en	us	App Store	8/20/22 15:49				fransimobile	This is a bad app; even one star is more than it deserves.	und	bad app even one star deserve	Negative	1	0	0
App Store	9f26ad19-7e7c-44e0-b5e8-b9a2cb42df6d	ممتاز ما شاء الله. وانصح به.	8/4/22 16:14	اسوا ابلكيشن				en	us	App Store	8/4/22 16:14				fransimobile	the worst application	ar	bad application	Negative	1	0	0
App Store	2c5b5c11-2bd0-4566-a350-791a45bd42dc	Asmaa57	4/22/22 23:26	التحديث الأخير سيء				en	us	App Store	4/22/22 23:26				fransimobile	The application is not working after the update.	ar	application work update	Negative	0	1	0
App Store	e83086a1-838e-4df3-9555-e8e21518d713	ذطذهغذهغمذحى	4/22/22 20:50	المفروض ولا نجمه				en	us	App Store	4/22/22 20:50				fransimobile	Why doesn't he speak well, God willing? Neither the first nor the second were left to speak and work.	ar	doesnt speak well god will neither first second leave speak work	Negative	1	1	0
App Store	d1951e51-a725-41a2-8865-e7d39f45ff68	ikhaled.sh	3/31/22 17:32	سيء جدا				en	us	App Store	3/31/22 17:32				fransimobile	The worst banking program I have ever used.	ar	bad bank program ever use	Negative	1	0	0
App Store	be79ab0f-aa63-4ba6-8107-97aa419be6f3	الحر الباكي	3/25/22 12:06	مشكلة التحديث الجديد				en	us	App Store	3/25/22 12:06				fransimobile	There is a problem where I'm not receiving messages for withdrawals or financial transactions through the application, such as transfers or bill payments. Also, when money is deducted from my balance, I do not receive any notification. In addition, when I pay my telecommunications company, it appears as a payment to the Ministry of Interior in the account statement. How can this be?	ar	problem im receive message withdrawals financial transactions application transfer bill payments also money deduct balance receive notification addition pay telecommunications company appear payment ministry interior account statement	Negative	0	1	0
