# Supplementary material for: Retrieval-augmented generation analysis of user reviews in Saudi mobile banking apps: a comparative user experience study of iOS and Android
Source: PeerJ journal article supplement (doi:10.7717/peerj-cs.3565), 2026-02-06
Supplement: iOS.zip [file riyad-bank-mobile_final.xlsx]

## Sheet: Sheet 1 - riyad-bank-mobile_fin
riyad-bank-mobile_final
source	review_id	user_name	review_date	review_title	developer_response	developer_response_date	thumbs_up	language_code	country_code	app_name	review_description	en	cleaned_reviews	Sentiment	ï»¿source	Satisfaction	Effectiveness	Efficiency
App Store	d177bd83-ef58-4f98-a3d9-ab3aa3cc343e	Mohsin24	3/13/22 12:18	Best bank				en	au	riyad-bank	Riyadh bank is the best of all	en	riyadh bank best	Positive	App Store	0	0	0
App Store	cb2ef3bb-fa57-4b69-83da-2f68ceed1eed	Saad Sheashaa	3/9/22 13:31	Review				en	eg	riyad-bank	Fantastic Application ð	en	fantastic application	Positive	App Store	0	0	0
App Store	0cb4ca4c-6847-4f3b-a0a5-f32dad526f55	khalid456789	2/23/22 8:35	سئ				en	gb	riyad-bank	It is very difficult for me now. I have been trying for over two months to change the password, but it does not work for me.	ar	difficult try two months change password work	Negative	App Store	1	1	0
App Store	e971340e-4623-4b02-9af0-143600f45b11	DudeWithDragon	3/26/22 15:00	Aby				en	in	riyad-bank	Its an easy use app with all the facilities that can offer. One can transfer payments, pay bills, pay traffic fines, recharge mobiles, pay the credit card bills etc with such ease. It offers very good security and Iâve been using it from the last 5 years. If you are a Riyad Bank account holder, this app is a must for safe and convenient transactions, overseas payments etc. ðð»ðð»ðð…	en	easy use app facilities offer one transfer payments pay bill pay traffic fin recharge mobiles pay credit card bill etc ease offer good security ive use last years riyad bank account holder app must safe convenient transactions overseas payments etc	Positive	App Store	0	0	0
App Store	2b35ec27-c2a1-4c6d-81be-3c66ae144903	🙏🙏😡😡	3/10/22 8:31	Very good and easy to use				en	in	riyad-bank	Very good app and it will be excellent once the option to send money through western union for expatriates.	en	good app excellent option send money western union expatriate	Positive	App Store	0	0	0
App Store	1320c69b-2cef-4fff-8944-1e0ed2fee679	MS@Indian	3/14/22 7:36	Excellent				en	in	riyad-bank	Riyas bank is best in service and price. Always number one choice	en	riyas bank best service price always number one choice	Positive	App Store	0	0	0
App Store	d3e4e661-89a4-4bc9-95d2-b2eecee2aff3	imdad.stc	3/17/22 22:29	Easy & reliable				en	in	riyad-bank	Easy & reliable	en	easy reliable	Positive	App Store	0	0	0
App Store	0f5bd493-a402-4254-ad62-c6fb502fac52	Iskandar 4s	3/9/22 13:53	Riyad online				en	my	riyad-bank	Very convenient and user friendly app	en	convenient user friendly app	Positive	App Store	0	0	0
App Store	b203150f-a1d3-4c26-9650-c66f4e91b8c6	Dan'agundi	3/10/22 9:02	Services				en	ng	riyad-bank	An Excellent service. The staff are always friendly and very helpful and hard working. They are also very courteous and respectful.	en	excellent service staff always friendly helpful hard work also courteous respectful	Positive	App Store	1	0	0
App Store	231804fa-552d-4920-ad09-427261176648	Alrbiee1	9/17/23 14:43	New customer				en	sa	riyad-bank	I spent almost 45 minutes just trying to activate my bank account with them through the application. I received a phone call, but not to activate my account, rather to activate my phone banking account. I was stuck because I only had the card with all the information inside, nothing more. They asked me to enter my account number, but how am I supposed to know the account number? Nothing helped. I…	ar	spend almost minutes try activate bank account application receive phone call activate account rather activate phone bank account stick card information inside nothing ask enter account number suppose know account number nothing help reach x customer support tell follow branch serious want go car pm sun heat visit branch activate account isnt option app isnt wifi open activate bank account comple…	Negative	App Store	1	1	0
App Store	98fdbc0a-c04e-42b3-8e2b-b9076cde69cc	abuaah0a	3/26/22 10:21	Best bank				en	sa	riyad-bank	From long term customer relationships with RiyadBank, I have never experienced anything bad to mention. In fact, I always find a solution for any financial problems I have ever had since I dealt with this bank. Moreover, hereâs something worth mentioning, is online banking. RiyadBank is the best as per everyone I know point of view and I second them with no doubt.	en	long term customer relationships riyadbank never experience anything bad mention fact always find solution financial problems ever since deal bank moreover heres something worth mention online bank riyadbank best per everyone know point view second doubt	Positive	App Store	1	0	0
App Store	0396ca44-b8a9-48d6-9560-f042ea961c26	Gh. MA <3	3/12/22 17:10	Very good				en	sa	riyad-bank	Great app, it makes it easy for the person to do many things instead of having to login to the website, all you have to do is go to the app and do the same thing. But one small thing is that the transfer process was confusing at the beginning.	ar	great app make easy person many things instead login website go app thing one small thing transfer process confuse begin	Positive	App Store	1	1	0
App Store	ea0bb542-84ba-4bbd-9a36-db73d3698b7a	Eng.ibrahimchehade	7/2/22 6:16	Bad app				en	sa	riyad-bank	Always crash, and you canât pay using this cart with mobile, stc or uber because you need to update your personal info Once you open the app and go to customer settings > work information > there are mandatory fields like nature of work itâs a dropdown empty and you canât select any things and you will be stack here ! Once i called the customer service they said itâs from apple pay and ap…	en	always crash cant pay use cart mobile stc uber need update personal info open app go customer settings work information mandatory field like nature work dropdown empty cant select things stack call customer service say apple pay apple mean work fine bank providers dont prefer app	Negative	App Store	0	1	0
App Store	e5c69fad-cda6-4b12-8b46-269c9842621a	Frank Maltus	4/13/22 10:26	The worst bank in Saudi Arabia				en	sa	riyad-bank	The worst customer service Iâve ever seen in any bank. Out of 4 cashiers only one is working, others are counting cash. Electronic queue doesnât work, lots of people at the waiting area are trying to understand whoâs next. It takes them 3-5 working days to deposit a transfer to your account. So unless you are kidnapped and forced to open an account with them, donât use them in any circums…	en	bad customer service ive ever see bank cashier one work others count cash electronic queue doesnt work lot people wait area try understand whos next take work days deposit transfer account unless kidnap force open account dont use circumstances great mistake try	Negative	App Store	1	1	1
App Store	e266b5e0-3ad2-41eb-903b-7147bd9ea4de	rayanrizwan	3/11/22 0:58	Online banking				en	sa	riyad-bank	There is no match of online banking experience Of Riyad bank. One thing that I applied for personal finance which is still pending due to my company not having contract with Riyad bank so if any one can assist me would much appreciate	en	match online bank experience riyad bank one thing apply personal finance still pending due company contract riyad bank one assist would much appreciate	Negative	App Store	0	1	0
App Store	64977695-04a6-4d64-9940-dcd8362ea6cd	Abrjos	3/17/22 7:36	Very good App				en	sa	riyad-bank	The RiyadBank App is really easy to use and fast. I have a few suggestions:- A digital lock could be provided to lock & unlock debit transactions. A transaction limit could be set by the account holder digitally for debit transactions. Both the above should be applicable for debit/credit cards internet banking.	en	riyadbank app really easy use fast suggestions digital lock could provide lock unlock debit transactions transaction limit could set account holder digitally debit transactions applicable debitcredit card internet bank	Positive	App Store	0	1	0
App Store	a64b84a6-b426-4f73-8f56-203fe1067e05	Zezo.pupil	2/28/22 10:14	Face id not working after new update				en	sa	riyad-bank	I have activated face id through app and verified using Riyad phone but issue still there and it is very annoying to loose this feature developer: Please recheck face id with iOS	en	activate face id app verify use riyad phone issue still annoy loose feature developer please recheck face id ios	Negative	App Store	1	1	0
App Store	79e133b1-9290-47f6-b4d2-ecf77cbbb78c	Bananje	5/26/22 8:06	Worst Bank App				en	sa	riyad-bank	Iâve used different bank apps, and this one literally is the WORST! Nothing is convenient at all, nothing can be reached or done easily, it hangs alot and the worst is that you canât do anything from updating info or such things online. I donât usually rate apps even if theyâre kinda down, but I couldnât not to review this one. This is how awful it is. You need so many development, and …	en	ive use different bank apps one literally bad nothing convenient nothing reach do easily hang alot bad cant anything update info things online dont usually rate apps even theyre kinda couldnt review one awful need many development ive regret open account wallah	Negative	App Store	1	1	1
App Store	97648f32-12f8-482a-a5c1-18cacf994122	spimaco	10/28/22 22:52	Disappointment				en	sa	riyad-bank	Since you updated your system it was very disappointing. Please take action for this problem my online banking is always have problemI when I call your hotline long time to connect with your agent Ive lost my mobile load but unfortunately your telephone operator did not meet. Please do action all the complain of your customer. I am planning to transfer in Al rhaji bank because of good service.	en	since update system disappoint please take action problem online bank always problemi call hotline long time connect agent ive lose mobile load unfortunately telephone operator meet please action complain customer plan transfer al rhaji bank good service	Negative	App Store	1	0	0
App Store	c07e2aff-2b33-41a8-be33-07966a34b6e5	Qannas2020	3/9/22 22:17	Worst experience ever				en	sa	riyad-bank	Even user experience been updated itâs still look cheap and it is not up to that level of quality, too many times crashes and I canât find a reason why they are not able to provide a good quality app I recommend the online website for your needs better than using this low quality application unfortunately :( Really disappointed	en	even user experience update still look cheap level quality many time crash cant find reason able provide good quality app recommend online website need good use low quality application unfortunately really disappoint	Negative	App Store	1	1	1
App Store	ebe61c4b-77bf-4f6f-89ca-0b8246b5c622	Mohd0001	3/10/22 8:17	Need update to speed up actions	{'id': 17313889, 'body': 'Dear customer, Thank you very much for your feedback,\nkindly contact us at 920002470 and we will be happy to serve you.\n\n', 'modified': '2020-08-17T04:54:29Z'}			en	sa	riyad-bank	Hi, Am newly joined customer to Riyadh bank. Actually i like the app, but some times it takes time to choose beneficiaries for transfer. There is also some delay in the app. Keep doing great Best wishes Please add notifications for bills Ø£Ø±Ø¬ÙØ§ ÙØ¶Ø¹ Ø§Ø´Ø¹Ø§Ø±Ø§Øª ÙÙÙÙØ§ØªÙØ±	en	hi newly join customer riyadh bank actually like app time take time choose beneficiaries transfer also delay app keep great best wish please add notifications bill	Positive	App Store	0	0	1
App Store	236eb6a6-f229-4940-890a-6897bac21725	kovt19	3/15/22 4:33	Saved my life several times!				en	sa	riyad-bank	You know when you are in a situation where a transaction must occur in minutes but your account is acting up, well not riyad banking app! These apps are life savers!	en	know situation transaction must occur minutes account act well riyad bank app apps life savers	Neutral	App Store	0	1	0
App Store	975922a0-45f8-42f1-8822-dbb78e330199	MishalD	3/13/22 7:00	Easy Interface				en	sa	riyad-bank	I like the app, and itâs actually one of the reasons why opening an account in the bank. However, I didnât like that transactions have very limited information.	en	like app actually one reason open account bank however didnt like transactions limit information	Neutral	App Store	0	1	0
App Store	594a27d2-8756-48aa-8991-ce51a893824e	Dunkel91	3/14/22 8:47	Easy and simple				en	sa	riyad-bank	The app really makes the financial transactions easy to make through simple steps which anyone can make.	en	app really make financial transactions easy make simple step anyone make	Positive	App Store	1	0	0
App Store	986f4d48-eeee-479a-8627-5bb05a7a80b1	Imran-sap	6/5/23 5:04	Disappointed:unable to find Funds Transfer services				en	sa	riyad-bank	Being loyal old Golden customer, itâs disappointing to find Funds transfer area missing or at least not found. So neither through your website nor this app, one can add beneficiary. Apparently, major focus is on new products promo. Please look into	en	loyal old golden customer disappoint find fund transfer area miss least find neither website app one add beneficiary apparently major focus new products promo please look	Negative	App Store	1	0	0
App Store	d9cc576a-d384-4907-b9ba-98feae9b4723	محب تيك توووووك	1/11/22 15:43	👇🏻👇🏻👇🏻👇🏻				en	sa	riyad-bank	Why can't I update the app to the latest version you have? And why did I not find the icon of the âauthorize and updateâ option, please reply to me and advise me	en	cant update app late version find icon authorize update option please reply advise	Negative	App Store	0	1	0
App Store	2899d8a8-fe92-474f-8186-40f54b58c660	grovilar	3/13/22 19:53	Excellent and the best Bank App				en	sa	riyad-bank	The Riyadh bank smartphone App is one of the best application ever used. It has all the functions required for banking transactions. Accessible from around the world.	en	riyadh bank smartphone app one best application ever use function require bank transactions accessible around world	Positive	App Store	1	0	0
App Store	21a24e67-d405-49ae-9ca1-2f35dbaf5802	A. Delivionos	8/31/22 11:33	Outstanding ⭐️				en	sa	riyad-bank	Thank you people of Riyad App. Really smooth and flawless. I moved to Riyad bank because of both your website and phone apps. Good job 11/10 Wallah â­ï¸â­ï¸â­ï¸â­ï¸â­ï¸	en	thank people riyad app really smooth flawless move riyad bank website phone apps good job wallah	Positive	App Store	0	0	0
App Store	609c151f-89cb-44b7-9a2c-b4b633c9c88b	ImranOmair	7/25/23 14:59	Login issue				en	sa	riyad-bank	I am trying to login from 2 days Riyad mobile is not logging saying connection issue. What should I do?	en	try login days riyad mobile log say connection issue	Negative	App Store	0	1	0
App Store	8be88f35-1b86-460a-a08c-23bedcf3bf8f	Husband Lover	3/9/22 18:22	Excellent Services				en	sa	riyad-bank	I am a customer in Riyadh bank for more than 20 plus years and I am happy with the services and the app. Thank you	en	customer riyadh bank plus years happy service app thank	Positive	App Store	0	0	0
App Store	624c335f-c81a-445b-9adb-5dcd2f2a2311	maha shareef	3/13/22 18:13	Easy to use				en	sa	riyad-bank	All options available with one bank. That is Riyadh bank	en	options available one bank riyadh bank	Neutral	App Store	0	1	0
App Store	ce15b20b-bfc0-441b-8e70-0cee87758954	Azam hanif	3/14/22 15:45	Appreciate				en	sa	riyad-bank	Riyadh bank is the best bank and also service is very good, Thank you riyadh bank for giving us a good service	en	riyadh bank best bank also service good thank riyadh bank give us good service	Positive	App Store	0	0	0
App Store	f73d82cc-eacc-4acb-abe2-279c0d96aa66	Emadeen	3/21/22 10:22	Online account				en	sa	riyad-bank	Great application to manage someoneâs account online. Very useful and easy to use	en	great application manage someones account online useful easy use	Positive	App Store	0	0	0
App Store	4033519f-6435-421d-9e37-2788cd12db54	IMARahman	3/13/22 18:28	Very useful and a life saver				en	sa	riyad-bank	Excellent, easy to use and reliable aap. All transactions are done within minutes so effortlessly.	en	excellent easy use reliable aap transactions do within minutes effortlessly	Positive	App Store	0	0	0
App Store	372c219b-921f-430d-b4dc-be4cec2dde27	Baker Mustafa	11/12/22 19:44	Icons issues				en	sa	riyad-bank	There is a problem with selection icons images in the App and also your web site as they cant be seen ( not displayed) . Please check	en	problem selection icons image app also web site cant see display please check	Negative	App Store	0	1	0
App Store	11f2c022-0b30-44a3-9ff1-005764e63077	iview1	3/13/22 6:53	The Best				en	sa	riyad-bank	Simply the best, smooth to operate, quick and easiness but you need to have CASH in your account to enjoy online banking.	en	simply best smooth operate quick easiness need cash account enjoy online bank	Positive	App Store	0	0	0
App Store	039318c3-aabb-442c-b67e-a83540d314e9	Faihan	3/15/22 12:30	The best bank				en	sa	riyad-bank	I have tried many banks and found that RYB is the best for personal online banking functions.	en	try many bank find ryb best personal online bank function	Positive	App Store	0	1	0
App Store	f5aa2fa6-91d3-4966-9ff9-6c337604cf85	Atif Munir	3/17/22 13:38	Easy Use				en	sa	riyad-bank	The app is user friendly. The notification to pay traffic fines. Wow.	en	app user friendly notification pay traffic fin wow	Positive	App Store	0	0	0
App Store	5eb00473-7716-44b4-87f6-2b6716e5bec5	Iffikash	3/18/22 14:44	Slow Opening				en	sa	riyad-bank	It is taken sometime to open the app, earlier it was working fine but now not like before. Hope to resolve this Minor issue very soon.	en	take sometime open app early work fine like hope resolve minor issue soon	Neutral	App Store	0	1	0
App Store	c1171463-af06-44b4-88b2-301ecdc52c84	alammara93	3/14/22 10:13	Fantastic and Error FREE!!!!				en	sa	riyad-bank	Excellent application, it is the reason why I am a loyal customer to this bank :)â¦ wish the Riyad Capital app was the sameð	en	excellent application reason loyal customer bank wish riyad capital app	Positive	App Store	1	0	0
App Store	53e69da8-dc17-4461-87ae-967bb4c3ac9a	Muneera SH	10/1/22 12:53	Review				en	sa	riyad-bank	User friendly ,reliable, high response and fast transactions ! ð	en	user friendly reliable high response fast transactions	Positive	App Store	0	0	0
App Store	4e52f8b3-373e-4135-bd28-4e866566d12c	HarisMehmood Ahsanellahi	3/12/22 16:30	Personal review				en	sa	riyad-bank	After they approved there service now they are a lot better than Al Rajhi Bank	en	approve service lot good al rajhi bank	Positive	App Store	0	0	0
App Store	352bc29e-9008-4ac0-8f61-d18f3eebf239	#justlove	3/16/22 21:12	Very convenient to use and helpful.				en	sa	riyad-bank	Digital banking is really helpful, it saves time.	en	digital bank really helpful save time	Positive	App Store	0	0	0
App Store	06a0f719-15fa-4dab-a1f4-e0e7eb6574a9	tahnimussi	3/19/22 10:40	Convenient				en	sa	riyad-bank	This app is so handy to transfer money or for checking the balance. I love it.	en	app handy transfer money check balance love	Positive	App Store	0	1	0
App Store	f646d85f-00fc-4158-949a-019d85d7b6b0	Shiju3333	3/11/22 12:11	My Preferred Banking App				en	sa	riyad-bank	I love to Bank through Riyad Bankâs Mobile app as its like my entire Banking needs falls to my finger tips.	en	love bank riyad bank mobile app like entire bank need fall finger tip	Positive	App Store	1	0	1
App Store	fb472090-c15b-440b-b26b-00cd706ee115	Osama Alzuabi	3/10/22 17:19	Easy and handy				en	sa	riyad-bank	Thanks Riyad Bank, the app is excellent and easy to use it make my life easier.	en	thank riyad bank app excellent easy use make life easy	Positive	App Store	0	0	0
App Store	c96aacab-ed14-40fd-9619-9a537b9cd3a8	Sameerm3	3/19/22 17:37	Easy use				en	sa	riyad-bank	Easy and simple navigation.	en	easy simple navigation	Positive	App Store	0	0	0
App Store	89e37efc-377f-43b3-8f46-bdef829d1faf	abdulaziz-mb	5/27/22 10:01	No Reference field for international transfers				en	sa	riyad-bank	Overall great app, but I cant add âpayment reference noteâ part of international transfer and this requires going to the bank!	en	overall great app cant add payment reference note part international transfer require go bank	Negative	App Store	1	1	0
App Store	7387c035-bdec-4f4b-8593-1033a7a003af	abdulsuli	3/22/22 20:08	RiyadBank				en	sa	riyad-bank	Very helpful and easy to use application glad we have it ð	en	helpful easy use application glad	Positive	App Store	0	0	0
App Store	4fe0738d-3d54-4405-bec0-5f62ac4b3145	Abdullah m sh	3/14/22 12:37	My experience				en	sa	riyad-bank	It is good , but it is not working when i am out of Saudi	en	good work saudi	Negative	App Store	0	0	0
App Store	543e9e9d-d20a-4861-89da-bfa7d26ec492	A.A.Alaboud	3/9/22 14:34	Perfection				en	sa	riyad-bank	Easy, smooth and great colors to look at. Safety & security are very good specially when you login.	en	easy smooth great color look safety security good specially login	Positive	App Store	0	0	0
App Store	18f43cc9-be96-4131-9b4e-cb4148615b55	Adnanhaji	3/16/22 7:13	Retired employee				en	sa	riyad-bank	We still looking forward for more developments and improvments	en	still look forward developments improvments	Positive	App Store	1	0	0
App Store	9990bee9-2b6a-4a48-b3cf-0f241e435103	Hijaz1	2/23/22 19:37	App not opening even after update				en	sa	riyad-bank	App keeps telling me that it needs update & wonât open. I updated & still not letting me into my account. I can use my account online without trouble but the app is not working anymore. Please fix it.	en	app keep tell need update wont open update still let account use account online without trouble app work anymore please fix	Negative	App Store	0	1	0
App Store	e2fe4baf-94ad-4988-a058-bdab3a34304d	A M U	11/5/22 7:05	User				en	sa	riyad-bank	I canât update My iPhone 6 to the new version from App. Store.	en	cant update iphone new version app store	Neutral	App Store	0	1	0
App Store	ad3af8c6-c95a-4f08-897c-2d72ee10061a	Burtlax	3/11/22 5:42	Online Access				en	sa	riyad-bank	Excellent and Easy. Many thanks	en	excellent easy many thank	Positive	App Store	0	0	0
App Store	5764314b-fe82-4185-bdb6-c5cf0cabe0aa	Abadreamer	9/1/22 15:22	Excellent bank, excellent app				en	sa	riyad-bank	One of the best banking applications offering first class services	en	one best bank applications offer first class service	Positive	App Store	0	0	0
App Store	c9d3c436-8d91-4767-b41c-b89136ffb1da	jgcisland77	3/15/22 11:46	A good app.				en	sa	riyad-bank	Easy to work with it, nice interface and very safe. Recommended.	en	easy work nice interface safe recommend	Positive	App Store	0	0	0
App Store	9b16976d-2555-4395-a991-02646e42b5d6	Doaa Alzanbagi	3/13/22 9:33	Rate				en	sa	riyad-bank	Easy to use The whole services are excellent	en	easy use whole service excellent	Positive	App Store	0	0	0
App Store	c7e2a9e3-d342-4456-8584-1684ed9ec633	mohammedcorsa	3/10/22 14:04	Riyadh bank application				en	sa	riyad-bank	Perfect and easy to use it	en	perfect easy use	Positive	App Store	0	0	0
App Store	cc0eecda-d402-45a9-9bc5-222f2c013a46	osama27age	3/20/22 7:41	Visa card				en	sa	riyad-bank	I should recognize ve a messege to pay my visa card befor the date of 20	en	recognize messege pay visa card befor date	Neutral	App Store	0	1	0
App Store	f9ff39b4-bf7d-4b8e-81d8-02f69f36cbb8	m. almallah	3/9/22 16:10	Some major issues must be fixed				en	sa	riyad-bank	Fingerprint entry always crashes and application asks me to activate it	en	fingerprint entry always crash application ask activate	Negative	App Store	0	1	0
App Store	81668b8c-cf65-40d2-90bd-34c37ffd1bae	wasim moued	3/10/22 7:47	Well done				en	sa	riyad-bank	Excellent application Keep up the good work	en	excellent application keep good work	Positive	App Store	0	0	0
App Store	4f524432-73d1-4676-a22b-0c35efb8d422	Ghazi 48	7/5/23 20:31	Unable to use due to popup				en	sa	riyad-bank	Unfortunately as a new customer, I am unable to use the app totally due to the weird Token App popup advertisement that appears after login. It appears and buttons are not working so I am stuck.	en	unfortunately new customer unable use app totally due weird token app popup advertisement appear login appear button work stick	Negative	App Store	1	1	0
App Store	06ccc445-eb8a-4976-9b8c-79d1e96bec87	Salas70	3/10/22 16:46	Review				en	sa	riyad-bank	The application is good but from time to time I experience failure in the App. And sometimes difficulties to log in	en	application good time time experience failure app sometimes difficulties log	Negative	App Store	1	1	0
App Store	20d6bd0c-6bb8-4afa-8602-966e9658a33f	Barhooom87	10/9/22 2:53	Screen shot disabled				en	sa	riyad-bank	I used to capture most of the things between my accounts and CCs, from last update this feature been disabled with no valid reason.	en	use capture things account ccs last update feature disable valid reason	Negative	App Store	0	1	0
App Store	fad14c3d-f299-4769-8daa-ff22971411c0	Bindekan	3/10/22 12:57	Review				en	sa	riyad-bank	The Money Transfer Options Are Need for More Accessibility to D	en	money transfer options need accessibility	Neutral	App Store	0	1	0
App Store	d064db69-66ee-4eb5-b526-4fffb1546c6b	Cusaqi	3/19/22 12:10	Saqib				en	sa	riyad-bank	Excellent and user friendly app. Thank you Riyad bank.	en	excellent user friendly app thank riyad bank	Positive	App Store	0	0	0
App Store	82a4347a-38e1-4f17-9085-3d863110fecf	jamflex909	6/25/23 18:34	App is broken				en	sa	riyad-bank	The app is asking to track my location whenever i try to sign in but there is no option to enable tracking on my ipad for this specific app..	en	app ask track location whenever try sign option enable track ipad specific app	Neutral	App Store	0	1	0
App Store	72149714-1f43-4cea-a369-4cdeaa7ee8f4	Renad a a	3/14/22 19:11	perfect				en	sa	riyad-bank	I am a programmer and I can tell this is the best banking account ever	en	programmer tell best bank account ever	Positive	App Store	0	0	0
App Store	48c1b58e-7524-4846-ba66-2d7da4eb772a	القوية العاصية2	9/12/22 17:27	This app is very cool 👍👍				en	sa	riyad-bank	I like this app and i hope you make it work with iOS 16 ð	en	like app hope make work ios	Positive	App Store	0	1	0
App Store	75c25b0c-8738-4e92-bdd8-6de293929ed1	abo baisan	3/16/22 11:11	Wonderful				en	sa	riyad-bank	Easy and handy	en	easy handy	Positive	App Store	0	0	0
App Store	fc731722-5368-4382-bdeb-d459ab8eb19b	pandi.R	3/23/22 12:28	Money Transfer international				en	sa	riyad-bank	Fast & Safe Services by Riyadh bank app ð	en	fast safe service riyadh bank app	Positive	App Store	0	0	0
App Store	16617b9b-dac5-4481-bf82-fe4a4ad20379	Aluyun	3/19/22 22:46	Riad app				en	sa	riyad-bank	Very good app. Please continue the hard work	en	good app please continue hard work	Positive	App Store	1	0	0
App Store	eade1dc8-9e96-4ff8-ad27-487b187ea691	Mohamed Simsaa	3/12/22 16:24	Best bank ever				en	sa	riyad-bank	My primary bank for sure	en	primary bank sure	Neutral	App Store	1	0	0
App Store	37af149f-6db7-45e9-8704-28ed0c8c5baa	الكثير مو جاد لزواج	3/11/22 13:03	Suggestion				en	sa	riyad-bank	Pls by number or parcod adding people	en	pls number parcod add people	Neutral	App Store	0	1	0
App Store	f032c32f-9d91-4f3c-a6b3-1ed4dee9907a	RahafBasha	3/12/22 14:15	The best Bank application				en	sa	riyad-bank	recommended	en	recommend	Positive	App Store	1	0	0
App Store	25ee814b-d58f-4ab5-98da-1c937e116b8e	Azzoz.	2/3/23 20:02	So slow				en	sa	riyad-bank	Worst bank app ever it takes more than 15 minutes to use your card after you enter an app it is super slow and old	en	bad bank app ever take minutes use card enter app super slow old	Negative	App Store	1	0	1
App Store	8be12567-1926-4b7a-bf7d-7a0231f6696f	7azem Ouf	2/26/22 21:11	Quick access				en	sa	riyad-bank	Quick access deactivated after every update! And is not working after many tries!!	en	quick access deactivate every update work many try	Negative	App Store	0	1	0
App Store	47c21d4c-2eb2-464b-8a2a-fd8b0f667aeb	mdmdhsizbck	7/22/22 8:55	always network error				en	sa	riyad-bank	Please fix. I have strong internet connection but every time i update my info it shows connection error.	en	please fix strong internet connection every time update info show connection error	Negative	App Store	0	1	0
App Store	dad3fc95-bbea-4d98-96a6-66f6a335c746	stenders Saudi	1/3/22 5:20	Transfer doesnt work				en	sa	riyad-bank	I have iphone 13 pro max, with ios 15.0.2 the transfer functionality in the app doesn't work. Because its shows the screen in the lower half of the phone with empty upper half screen, the remaining of the page is hidden. Look like the developers didnt do a proper test in all phones and all sizes to insure its working fine. Such bug in bank like Riyad, with critical app should not be exist ..	en	iphone pro max ios transfer functionality app doesnt work show screen low half phone empty upper half screen remain page hide look like developers didnt proper test phone size insure work fine bug bank like riyad critical app exist	Negative	App Store	1	1	0
App Store	5f830754-2ab0-448a-afc8-8522e3fbea49	siham mustafa	3/23/22 16:32	Riyad Bank				en	sa	riyad-bank	Life is easier with this app	en	life easy app	Positive	App Store	0	0	0
App Store	495d625a-51b7-4263-95a2-032b8047a255	MAHER391402	3/13/22 13:28	Excellent app				en	sa	riyad-bank	Excellent app, friendly use	en	excellent app friendly use	Positive	App Store	0	0	0
App Store	c479c02f-682c-4109-93c0-45ca1e1c6545	Jbool	3/22/22 9:48	Face recognition isnt working				en	sa	riyad-bank	Since the last update the face quick access isnt working I thought updating means better service However its going backwards	en	since last update face quick access isnt work think update mean good service however go backwards	Negative	App Store	0	1	0
App Store	836c125f-67e3-4cdd-821e-cbb9fee0999b	Althachi	3/20/22 5:14	Face id				en	sa	riyad-bank	Face id always gets deactivated. Apart from that everything is superb.	en	face id always get deactivate apart everything superb	Positive	App Store	0	1	0
App Store	30a32c5d-f8e5-4661-afaf-9684973642e9	O’clock 11	1/2/22 9:54	App RiyadBank				en	sa	riyad-bank	Can you please fix the app I want to make a transfer but I canât thereâs no options to click enter after I put the name of my city. Please update a better version of the app ASAP.	en	please fix app want make transfer cant theres options click enter put name city please update good version app asap	Negative	App Store	0	1	0
App Store	ab62680d-b384-4517-91af-1b90d177ab6f	Shabeer Ali	3/23/22 6:23	Good but needs to be more simple				en	sa	riyad-bank	Needs to be less complicated for transfers	en	need less complicate transfer	Neutral	App Store	1	0	0
App Store	68a23c63-43db-4b02-9909-19e23689a172	Djeyakumar	3/13/22 6:15	Excellent Service				en	sa	riyad-bank	Great Bankâ¦Excellent Service and Care.	en	great bankexcellent service care	Positive	App Store	0	0	0
App Store	c3b6c8d5-e96f-4943-92d6-64a056adab5c	fgjjjtddd	8/24/23 8:45	Stil	{'id': 10753932, 'body': 'Our apologies for the unpleasant experience with the new Riyad Mobile App, we would like to inform that we are releasing an improved update within days.\n\nPlease provide us with the user ID via email: \napp@riyadbank.com \n\n Since you are a part in developing Riyad Mobile App, you will be awarded with 1000 Hassad points as an appreciation for your kind contribution.', …			en	sa	riyad-bank	Western Union service is NOT working in mobile. If the service is bot provided or not functioning âRemove the serviceâ from your mobile app. Rating: âLess than Satisfactoryâ	en	western union service work mobile service bot provide function remove service mobile app rat less satisfactory	Negative	App Store	1	1	0
App Store	1665b3a8-2fc3-4be1-88b7-121fb6d79a8a	ButtSaab786	1/24/23 15:11	Unable to open account				en	sa	riyad-bank	Unable to open account online . Everytime I enter my id number they open bouki app	en	unable open account online everytime enter id number open bouki app	Negative	App Store	0	1	0
App Store	89522b1e-04d6-4876-8d6c-1da17243bea0	Rami almwari	3/16/22 10:06	Best bank ever				en	sa	riyad-bank	All I need in one App	en	need one app	Positive	App Store	1	0	0
App Store	36b8558b-0f0c-4aef-b3d3-80f06c58b3c5	Alyashanti	11/7/22 12:54	The new version won’t let me log in				en	sa	riyad-bank	They latest update wouldnât let me get into my account please fix it	en	late update wouldnt let get account please fix	Negative	App Store	0	1	0
App Store	33ca7049-804b-4c40-86d8-359c38601152	Mohamedelmodather	10/18/22 5:10	Needs Upgrade				en	sa	riyad-bank	Please upgrade your application; itâs so outdated. You can mock AlRjhi app if you cannot develop your own.	en	please upgrade application outdated mock alrjhi app develop	Negative	App Store	1	0	0
App Store	d01714cd-cb45-40c6-835c-b03b0bc16013	iqayoom	3/9/22 20:32	Schemes				en	sa	riyad-bank	Need cash back on international transfer	en	need cash back international transfer	Neutral	App Store	0	1	0
App Store	84cd21a8-dc76-48e4-98ae-01b43be26221	Bilu512	3/11/22 10:38	Riyad bank app				en	sa	riyad-bank	Riyad bank mobile app is working very good.	en	riyad bank mobile app work good	Positive	App Store	0	0	0
App Store	0497f64c-feec-4b21-a545-3179d50ca377	hacking scheme	11/5/22 4:00	Looks like a hacking scheme				en	sa	riyad-bank	The way the new logon works looks like luring customers by a hacker. Why are asking to link id with mobile. This should be done at the bank	en	way new logon work look like lure customers hacker ask link id mobile do bank	Negative	App Store	1	0	0
App Store	0b68f18d-a8a9-4983-804d-30062f7b4974	Md Kinarul	3/26/22 5:14	Nice				en	sa	riyad-bank	Very good serviceâs thanks	en	good service thank	Positive	App Store	0	0	0
App Store	680ab62f-b8d6-4127-905c-63ed0b6e4717	AHataba	3/20/22 8:18	Excellent				en	sa	riyad-bank	Very Easy & Simple	en	easy simple	Positive	App Store	0	0	0
App Store	2336d16d-f339-4ae0-a11d-72b17af498cb	fewqry	3/16/22 11:14	Great App				en	sa	riyad-bank	Easy and very useful	en	easy useful	Positive	App Store	0	0	0
App Store	4d20ca82-e61c-4b3c-945a-6ad143f53b1f	3ashat filastin	3/12/22 14:32	Excellent				en	sa	riyad-bank	One of the best bank applications in the Arab Gulf.	en	one best bank applications arab gulf	Positive	App Store	0	0	0
App Store	ee1aab03-f799-449a-bfae-2cb804095de6	im hallucination	10/27/22 2:46	The worst application				en	sa	riyad-bank	I canât enter my account for a weeks now , I tried everything but thereâs NOTHING	en	cant enter account weeks try everything theres nothing	Negative	App Store	0	1	0
App Store	2ff30c50-7ad7-4b76-8aaa-c8b79bb4443b	abufahd1957	3/15/22 9:01	riyadh				en	sa	riyad-bank	outstanding easy to use gives what all i want tanks alt	en	outstanding easy use give want tank alt	Positive	App Store	0	0	0
App Store	e8d1c8ca-eb21-4e14-a75a-435e00ca8aa9	AnasAJa	4/22/22 2:12	Bad customer service				en	sa	riyad-bank	Worst bank ever in terms of providing services online and at branch place	en	bad bank ever term provide service online branch place	Negative	App Store	1	0	0
App Store	66255b0e-0f9e-4d57-abd0-5f8e542c10e2	Dxiler	6/30/23 18:30	App				en	sa	riyad-bank	Riyadh bank app should be change and improved,	en	riyadh bank app change improve	Neutral	App Store	1	0	0
App Store	1eeceee3-8ca2-47eb-b4a0-ae5d686e951c	Rafat077	3/12/22 17:15	Perfect				en	sa	riyad-bank	Perfect	en	perfect	Positive	App Store	0	0	0
App Store	13889525-e0cf-468f-941b-1845a5bec1fc	Dr.Alanoud.Manssour	3/11/22 8:35	The Best				en	sa	riyad-bank	Best bank application ever !	en	best bank application ever	Positive	App Store	0	0	0
App Store	610552f3-8cda-4835-9ac9-b1d6ff6c5e7b	Salahlad	3/9/22 15:25	Great				en	sa	riyad-bank	Good app. Thank you	en	good app thank	Positive	App Store	0	0	0
App Store	1b384467-216a-4ad8-9cc0-6d8ec6834a29	ᗰᗩᖇYOOᗰᗩᕼ	3/26/22 19:03	Easy				en	sa	riyad-bank	Good app	en	good app	Positive	App Store	0	0	0
App Store	500838ea-87ec-40c5-acfe-253c874b558c	azzu50	5/29/23 2:01	Not responding app				en	sa	riyad-bank	App is lagging, not yet open since last week	en	app lag yet open since last week	Negative	App Store	1	0	0
App Store	aa5fbb76-96e5-4c65-8b41-c152c2e65cdc	@Noush	3/10/22 17:00	Good services				en	sa	riyad-bank	Good nd very nice service	en	good nd nice service	Positive	App Store	0	0	0
App Store	3a77de32-62ec-457c-a709-22dd2c1b6880	SaedAbed	3/11/22 14:14	Awesome				en	sa	riyad-bank	The best bank	en	best bank	Positive	App Store	0	0	0
App Store	b695b704-3617-4602-afb1-0c780df380eb	tooolu	3/15/22 20:36	Report				en	sa	riyad-bank	RiyadBank is doing great	en	riyadbank great	Positive	App Store	0	0	0
App Store	5faa4883-2882-40f7-8a78-2673cea77725	Larien Martin	3/16/22 13:15	Wallahi very good				en	sa	riyad-bank	Wallahi very good app	en	wallahi good app	Positive	App Store	0	0	0
App Store	ac01578c-ec2e-47d6-9c79-ff61bae1e26b	ib turki	3/17/22 11:09	Tanks it really excellent				en	sa	riyad-bank	Best wishes	en	best wish	Positive	App Store	0	0	0
App Store	d8a0899f-86b9-40f2-a3e2-256defe53b7e	Nazzx4	3/1/22 11:35	This version is hanging				en	sa	riyad-bank	I agree with the earlier comment	en	agree early comment	Neutral	App Store	1	0	0
App Store	f8a8a28b-c3b4-4c42-8274-8985867bdcdd	malhamed	3/19/22 14:23	going up				en	sa	riyad-bank	good luck	en	good luck	Positive	App Store	0	0	0
App Store	6bab8a03-1d0a-4d46-a152-aa101809ab0e	NdikumanapiresAlly	3/9/22 22:23	Best app				en	sa	riyad-bank	Best one	en	best one	Positive	App Store	0	0	0
App Store	dd5dfd8b-2755-404f-afd4-0428accb7a9b	UcfSO	5/4/23 15:00	Poor iPad Experience				en	sa	riyad-bank	iPad screenshots are untrue on my iPad Mini. The worst experience ever!!!	en	ipad screenshots untrue ipad mini bad experience ever	Negative	App Store	1	0	0
App Store	936b5ca2-d4f2-49da-a120-e387f3d4f904	ashraf p	3/16/22 9:54	Very good app				en	sa	riyad-bank	Good	en	good	Positive	App Store	0	0	0
App Store	f7c9549c-3ec4-4ee4-9705-b679bb209965	Audi S8 🚘	3/20/22 21:03	Easy App.				en	sa	riyad-bank	Nice App.	en	nice app	Positive	App Store	0	0	0
App Store	f316c536-f258-4a40-afaa-260a8d0603cb	pic gp	3/22/22 18:29	Thanks				en	sa	riyad-bank	Thanks RiyadBank	en	thank riyadbank	Positive	App Store	0	0	0
App Store	526d9adc-c597-4032-b695-65729381e166	MHMD_Basalama	3/10/22 17:48	Nice				en	sa	riyad-bank	Great App	en	great app	Positive	App Store	0	0	0
App Store	5248b1e7-23cc-4087-b6a2-96a63d8a7b06	Abfwaz	3/22/22 15:14	RiyadBank App				en	sa	riyad-bank	Amazing ðð»	en	amaze	Positive	App Store	0	0	0
App Store	8540c97b-0e25-4f5a-97ab-919e8b1d068a	Asaad Palestine	11/4/22 17:27	Amazing app				en	sa	riyad-bank	Great application	ar	great application	Positive	App Store	0	0	0
App Store	34978c39-c086-4c94-aa23-85d6f9849501	ZZXXCCVV120n	3/23/22 18:21	Tight				en	sa	riyad-bank	Tight	en	tight	Neutral	App Store	0	0	0
App Store	c451c3f8-5e9f-4948-b4f2-69030023a27f	ali78_R	11/5/22 14:36	🔥🔥				en	sa	riyad-bank	ð¸ð¸ð¸	und		Neutral	App Store	0	0	0
App Store	1d301876-0f62-431d-9425-8886500a0382	القسطنيينيه	3/19/22 14:19	حب				en	sa	riyad-bank	Wonderful	ar	wonderful	Positive	App Store	0	0	0
App Store	1147d1c2-0bfd-4535-9f15-4a69814aeda2	longtim22	5/21/23 10:25	اختفاء ايكونه التحويل				en	sa	riyad-bank	Peace be upon you and the mercy of Allah. Today, the conversion icon disappeared from the program. Please solve the problem, and thank you and appreciate it.	ar	peace upon mercy allah today conversion icon disappear program please solve problem thank appreciate	Positive	App Store	0	1	0
App Store	d35d4705-3d56-4404-bdd8-d47ac59e8ce1	cocoezzi	2/26/22 21:44	شاشة الدخول السريع				en	sa	riyad-bank	The fingerprint and PIN code are not working on the quick login screen. Please provide a solution.	ar	fingerprint pin code work quick login screen please provide solution	Negative	App Store	0	1	0
App Store	6051f4f2-a4b4-4722-b538-1d6142e78b2f	؟؟؟؟؟؟؟؟؟؟؟؟؟!!!!!و	7/29/22 15:04	اخطاء في التطبيق				en	sa	riyad-bank	Every week, he says, "You don't have a card, press learn."	ar	every week say dont card press learn	Neutral	App Store	0	1	0
App Store	b50d1aff-bdcb-418d-86ee-5caa7b507854	عبدالله٦٦٣٣	5/28/22 16:29	سيئ				en	sa	riyad-bank	There are many application problems.	ar	many application problems	Negative	App Store	0	1	0
App Store	e584250b-e21b-4467-beaa-832c76d3139b	osamanaesa	5/19/22 8:07	موضوع البصمة				en	sa	riyad-bank	We kindly request a solution to the fingerprint login issue, as the application rejects the fingerprint login every month until I register again.	ar	kindly request solution fingerprint login issue application reject fingerprint login every month register	Negative	App Store	0	1	0
App Store	b2d38b56-d144-488f-9de9-a0d73a51b370	الحريصي ..✋🏻🇸🇦	3/28/22 2:58	التطبيق جيد ، لكن موظفين بنك الرياض سيئين جداً في التعامل				en	sa	riyad-bank	The application is good, but the employees of Bank Al-Riyadh are very bad in dealing with customers.	ar	application good employees bank alriyadh bad deal customers	Negative	App Store	1	0	0
App Store	ff1d4269-c40c-4448-90d4-9f1727999d1b	عبدالله ١٩٩٨٩	3/8/22 13:47	عبدالله				en	sa	riyad-bank	Every time I enter the application, it asks me to re-activate the facial recognition. The problem has been going on for over a year now and has not been solved.	ar	every time enter application ask reactivate facial recognition problem go year solve	Negative	App Store	0	1	0
App Store	1dc4be8e-7e34-492c-a3c4-267fcbd46ce8	Abuhasn AbdulWahab	3/8/22 9:40	اخيس تطبيق على وجه الارض				en	sa	riyad-bank	The application is full of problems and its benefit is zero, and unfortunately, its services do not even deserve half a star.	ar	application full problems benefit zero unfortunately service even deserve half star	Negative	App Store	1	1	0
App Store	0583d82a-1ea8-4cb9-9b52-d3bfe0fa45a9	koshshin	2/20/22 16:10	فاشل				en	sa	riyad-bank	The worst	ar	bad	Negative	App Store	1	0	0
App Store	da95f343-7f5b-4df7-80d0-0ced25cff7d9	Azzam_rs	2/25/22 18:32	خاصية الدخول بالبصمه				en	sa	riyad-bank	Every time I activate the face recognition login feature, it gets canceled!	ar	every time activate face recognition login feature get cancel	Negative	App Store	0	1	0
App Store	a8d63620-6ad6-452f-8169-8eac07b21379	عبوده خليل	2/24/22 9:08	بنك الرياض				en	sa	riyad-bank	The worst application and the worst bank.	ar	bad application bad bank	Negative	App Store	1	0	0
App Store	fae67f29-4410-4d73-8e6a-f0892a41b486	Sunoory	2/23/22 17:00	تطبيق سيء				en	sa	riyad-bank	Quick login is not working.	ar	quick login work	Negative	App Store	0	1	0
App Store	dee72016-e320-4aab-9866-4d1f4cb3409b	Ahmad.0537073957.☺️	2/11/22 0:24	ا				en	sa	riyad-bank	The worst application	ar	bad application	Negative	App Store	1	0	0
App Store	eb43c0d9-0260-429f-b6f8-90a98b0e7864	تكنولوجيا نيوز	1/23/22 20:07	تطبيق الراجحي اطلق				en	sa	riyad-bank	It will take you years to reach the level of Al Rajhi Bank application.	ar	take years reach level al rajhi bank application	Negative	App Store	0	0	1
App Store	bb09bd0a-f875-41c0-ae96-39285defd538	hanan7790	1/3/22 17:01	زق				en	sa	riyad-bank	"Make the Zee ElZaq application just like Al Rajhi, you the worst."	ar	make zee elzaq application like al rajhi bad	Negative	App Store	1	0	0
App Store	73ed7d9d-430f-418b-95ce-0f99202bc4a6	ibrahim.990	9/2/23 17:40	ممتاز				en	sa	riyad-bank	Easy to use	ar	easy use	Positive	App Store	0	0	0
App Store	b42e0508-25ef-4c60-ab51-8130837746a4	ام نفلا	9/4/23 21:48	سي				en	sa	riyad-bank	Today, everything is not working, I don't know the reason. When I tried to transfer, it said you don't have an active account. And when I tried to pay with Apple Pay, it was declined. Adding the beneficiary is also very difficult, not easy at all.	ar	today everything work dont know reason try transfer say dont active account try pay apple pay decline add beneficiary also difficult easy	Negative	App Store	1	1	0
App Store	bfb793eb-4b27-4c29-b256-c42e3da3860e	D..111221	9/2/23 21:59	اسوء تطبيق				en	sa	riyad-bank	He always gets locked out, and they keep prompting him to change his password. Suddenly, the password becomes invalid and he has to change it again! It happens every time, it's so frustrating!	ar	always get lock keep prompt change password suddenly password become invalid change happen every time frustrate	Negative	App Store	1	1	0
App Store	f34ef5e2-6bce-4453-b137-37b98ee7df67	saody213	8/21/23 2:18	تعامل				en	sa	riyad-bank	I have a Rajhi account, and since I started using it, I have seen Riyadh as a better place because of my debts.	ar	rajhi account since start use see riyadh good place debts	Positive	App Store	0	1	0
App Store	f25b92c2-0670-45ad-b4c8-fd1e79df4567	طار الطير	9/2/23 4:35	التطبيق				en	sa	riyad-bank	I hope the application can be fully improved and be on par with other banking applications, or even better. I hope my voice is heard. Thank you.	ar	hope application fully improve par bank applications even good hope voice hear thank	Positive	App Store	1	0	0
App Store	8f6cc11f-e390-419e-a0c0-c6b4274e10be	Mm@*@	8/30/23 9:32	م				en	sa	riyad-bank	The worst bank you can deal with in your life.	ar	bad bank deal life	Negative	App Store	1	0	0
App Store	96325930-13d3-47b7-acea-0de8cbc5df2b	mohsain	8/22/23 9:48	التطبيق معلقه كشف العمليات				en	sa	riyad-bank	The application does not update card transactions and shows the last transaction that occurred a month ago!	ar	application update card transactions show last transaction occur month ago	Negative	App Store	0	1	0
App Store	a39aa1f0-3017-4d68-8316-449890e44a15	برنامج يتجرع الفشل	8/21/23 17:59	اسوء بنك				en	sa	riyad-bank	Runnnn! No one should use this bank, a piece of advice for the sake of God.	ar	runnnn one use bank piece advice sake god	Negative	App Store	1	0	0
App Store	dc969ed3-82e3-479d-b68b-dd328cedaf2c	minah A	8/21/23 7:16	اداء ضعيف في التحويل وفي تسجيل المستفيد				en	sa	riyad-bank	The program works fine for regular operations, but the transfer is extremely slow, even between my own accounts! I have to wait for a quarter or half an hour for the transfer to go through! Adding and activating beneficiaries is so annoying! First, it doesn't paste the IBAN number, I have to write it manually ð. I want something quick, I don't need my ID number, my secret number, or whatever e…	ar	program work fine regular operations transfer extremely slow even account wait quarter half hour transfer go add activate beneficiaries annoy first doesnt paste iban number write manually want something quick dont need id number secret number whatever else please im get frustrate consider switch another bank two things essential shame im still struggle despite technological advancements	Negative	App Store	1	1	1
App Store	228cd7f4-056b-4f00-8e26-1fcc2142c82d	ًًًًشكران	8/16/23 21:10	بنك الرياض				en	sa	riyad-bank	Thank you.	ar	thank	Positive	App Store	0	0	0
App Store	f933a311-78dc-4ac8-99d2-68d6a846dd1d	اعجبن	8/19/23 20:55	ما فيه اغبى				en	sa	riyad-bank	"The dumbest application and the most complicated application, with no guidance or registration method, it's all a personal endeavor. It treats you as if you are a software developer and not a customer. And it still doesn't work. The most absurd thing is when they sent me the temporary username and password, and I actually registered them. I received a call for activation and when I pressed "okay…	ar	dumb application complicate application guidance registration method personal endeavor treat software developer customer still doesnt work absurd thing send temporary username password actually register receive call activation press okay automate response say assist oh goodness enter application ask authentication get stick options available	Negative	App Store	1	1	0
App Store	36a42abf-0d3a-4df2-aa77-19baa5a034ef	t00my	8/19/23 8:12	تطبيق سيء وخدمة بطيئة				en	sa	riyad-bank	The application is bad and full of faults. I regret transferring my salary to them. I can no longer easily pay my monthly commitments. Firstly, the daily limit for local transfers is only 2500, which means if you need to transfer rent or any installment, you can't do it in one go. You have to split it and there must be at least a 15-minute gap between each transfer. Secondly, the application free…	ar	application bad full fault regret transfer salary long easily pay monthly commitments firstly daily limit local transfer mean need transfer rent installment cant one go split must least minute gap transfer secondly application freeze without reason middle transactions data lose due freeze thirdly add beneficiaries require call enter card number verification code add however time call never reach …	Negative	App Store	1	1	1
App Store	bc80b4b0-2210-46d2-8dfb-205829bd4217	طرامب	8/17/23 19:29	سيئ جدا				en	sa	riyad-bank	The worst bank I have ever known in my life and the worst application that drives one crazy.	ar	bad bank ever know life bad application drive one crazy	Negative	App Store	1	0	0
App Store	b097345e-fc81-4e4e-9ac7-0f13cddc4dcd	Faisal.94	8/16/23 17:31	أسوا تطبيق				en	sa	riyad-bank	The worst application ever! Every time I try to register, it rejects and says that I am already registered. Mind you, when I finally register, I want to know if you have no competition with other banks!!! Or are you just used to failure!!! I advise you to aim for progress and success if you want...	ar	bad application ever every time try register reject say already register mind finally register want know competition bank use failure advise aim progress success want	Negative	App Store	1	1	0
App Store	324c755e-dc25-4324-955c-3dc60dc3bc89	اعااااغا	8/1/23 9:02	اسوء بنك شفته في حياتي				en	sa	riyad-bank	The worst bank I have ever seen in my life.	ar	bad bank ever see life	Negative	App Store	1	0	0
App Store	adbcf7c5-94e4-4184-bf8b-876a5f2cc7e3	hatan212	7/31/23 14:12	تطبيق الرياض				en	sa	riyad-bank	The worst application on Earth in a strange way, by Allah the Almighty.	ar	bad application earth strange way allah almighty	Negative	App Store	1	0	0
App Store	de6bbb17-ebff-4410-ba31-dd2d2e7bd680	انا فيصل خالد	7/19/23 12:57	اخيس تطبيق				en	sa	riyad-bank	I don't recommend it. He says, "I don't have a national address, and I don't know what their situation is."	ar	dont recommend say dont national address dont know situation	Negative	App Store	1	0	0
App Store	0030b50a-d71f-4e42-878e-5c96a9beb280	تحمد العتيبي	7/16/23 15:42	سي والتطبيق لايعمل				en	sa	riyad-bank	Very handsome	ar	handsome	Positive	App Store	0	0	0
App Store	c6afb3b7-1e4b-4f5a-9cfb-ba4cc5d45a4b	الحربي🎓	7/8/23 11:14	سيء جداً				en	sa	riyad-bank	Poor services	ar	poor service	Negative	App Store	1	0	0
App Store	4f4e7558-1f49-45ac-8d43-bb1214e9da5f	abdallahtn	7/3/23 11:01	CashBack				en	sa	riyad-bank	The cashback does not appear at all in the application for the CashBack card. Please enable the service. Thank you.	ar	cashback appear application cashback card please enable service thank	Neutral	App Store	0	1	0
App Store	e17ad315-7493-4a25-996a-4a6cffca0b06	2"2020	7/2/23 3:20	التحديث فاشل وغير موفق ❌❌				en	sa	riyad-bank	I still need to enable the location service in order to use the application. I do not want to activate the location and I am unable to access the application. Why do I need to enable the location service?	ar	still need enable location service order use application want activate location unable access application need enable location service	Negative	App Store	0	1	0
App Store	5aa7ecdd-99e9-4fed-b180-daee5f0a48d1	juju200300	7/1/23 22:06	اسوء تطبيق واسوء بنك				en	sa	riyad-bank	Every time I try logging in, it tells me that my password is wrong, and every time I change it, I still can't log in again. On top of that, my face ID doesn't work, and whenever I add a beneficiary and try to send money, it gets rejected!!! I have to fill in my information again and it's exhausting. They told me that my salary will be deposited in your bank, but by God, you have the worst custome…	ar	every time try log tell password wrong every time change still cant log top face id doesnt work whenever add beneficiary try send money get reject fill information exhaust tell salary deposit bank god bad customer service bad bank unsuccessful application may god sufficient best agent	Negative	App Store	1	1	0
App Store	eca52bcd-2f04-42eb-b616-eb18ec81dae5	فيصل عبدالوهاب	6/27/23 12:14	حذف ظهور اعلان التوكن				en	sa	riyad-bank	It is necessary to remove the advertisement related to the token as soon as you enter the account. The advertisement appears and it is not possible to use the Bank Al Riyadh application. This is a problem in need of an urgent solution.	ar	necessary remove advertisement relate token soon enter account advertisement appear possible use bank al riyadh application problem need urgent solution	Negative	App Store	0	1	0
App Store	e5066c61-3442-443b-ba91-6d92816a3dc8	Ramzi Al Nasser	6/19/23 19:27	الحوالات				en	sa	riyad-bank	It is not possible to make transfers through the application at the current time.	ar	possible make transfer application current time	Negative	App Store	0	1	0
App Store	938c2943-6ff0-46ae-b65d-31619631a990	👀ابو فيصل	6/11/23 15:32	يامسؤووووول				en	sa	riyad-bank	The program is slow, slow, slow. What is the problem with the latest update? It doesn't let me in and says the password is incorrect, but it is correct. âï¸âï¸âï¸âï¸	ar	program slow slow slow problem late update doesnt let say password incorrect correct	Negative	App Store	0	1	1
App Store	706d54cd-7f04-4044-b27b-f5139600b292	Ibra_00987	5/16/23 13:53	اسوء تطبيق شفته في حياتي				en	sa	riyad-bank	"Very, very bad application and the bank has the worst services."	ar	bad application bank bad service	Negative	App Store	1	0	0
App Store	aa5c9fc1-69da-4c46-902b-70c3a172e3d7	vroqel	5/14/23 9:44	الحوالات				en	sa	riyad-bank	"The application is extremely unsuccessful, they shut down services and the most affected is the transfers, as we can never transfer. The customer service is also a failure as they do not understand the problem, which is the transfers. It is always closed."	ar	application extremely unsuccessful shut service affect transfer never transfer customer service also failure understand problem transfer always close	Negative	App Store	1	1	0
App Store	d7219c9d-1de5-40ec-a30d-3da836f52032	فوففو	5/9/23 8:55	بنك الرياض				en	sa	riyad-bank	"The application is frozen, I cannot send, transfer, or access any services. Please fix it, and thank you."	ar	application freeze send transfer access service please fix thank	Negative	App Store	0	1	1
App Store	44d4366b-d111-4ffb-a7a0-8e0f38c872ca	maxman900009	5/8/23 15:15	ما تغير				en	sa	riyad-bank	Every time there is an update, it's the same thing, nothing changes.	ar	every time update thing nothing change	Negative	App Store	0	0	0
App Store	f9197e66-9a64-4051-b794-ae7ba623c05c	شهدالقحطاني	5/4/23 11:53	حتي مافيه شحن رصيد اشياء كثير مفقود فيه				en	sa	riyad-bank	Why didn't you develop Bank Al Riyadh to be as good as other banks so that it can be user-friendly?	ar	didnt develop bank al riyadh good bank userfriendly	Neutral	App Store	1	0	0
App Store	d94c6f33-2747-4cf4-9055-8cb239dfc149	انا صح	5/3/23 18:45	خطأ في البرنامج				en	sa	riyad-bank	"I own an iPhone and I can't register for Facebook."	ar	iphone cant register facebook	Neutral	App Store	0	1	0
App Store	3b468f25-6c24-4702-a920-16da802f0dd7	بابا اسناني واوا	5/2/23 20:22	والله تطبيق غبي				en	sa	riyad-bank	Dear good people, I want to open an account in this frustrating bank. They told me to provide my national address so I can open an account. When I provided the address and tried to open the account, they told me the same thing again (provide your national address so you can open an account). I swear, I spent more than five times doing exactly what they asked for, but there was literally no benefi…	ar	dear good people want open account frustrate bank tell provide national address open account provide address try open account tell thing provide national address open account swear spend five time exactly ask literally benefit	Negative	App Store	1	0	0
App Store	70eba7fc-2eb8-438f-9e8d-6f60cb486c5a	CAPT. AL MAUOF	5/1/23 11:47	البصمة لاتعمل				en	sa	riyad-bank	When opening the fingerprint application, it doesn't work. I have to enter the code sent to me by the bank to access the application. Additionally, the comment is often requested during transfer operations. Very, very bad update.	ar	open fingerprint application doesnt work enter code send bank access application additionally comment often request transfer operations bad update	Negative	App Store	1	1	0
App Store	ef2cd31e-e895-433f-9733-87febae11961	حسن قلي	4/27/23 8:50	فتح حساب جديد				en	sa	riyad-bank	There is a problem in the application. The icon to open a new account at the bottom is not working on the iPad Pro 11.	ar	problem application icon open new account bottom work ipad pro	Negative	App Store	0	1	0
App Store	39b87d1b-8fcc-4c5b-9c45-9ce7f2cb4e98	عماااار العتيبي	4/27/23 8:36	بنك سيء				en	sa	riyad-bank	One of the worst banks on earth, bad customer service, bad system, and bad communication. I do not recommend dealing with them at all.	ar	one bad bank earth bad customer service bad system bad communication recommend deal	Negative	App Store	1	0	0
App Store	442a7380-b457-49c0-955f-e4fe95f2b7dd	صااااالح	4/18/23 23:05	ملاحظات والغرض من التحويل				en	sa	riyad-bank	The application is beautiful, but it lacks some essential features. The absence of these features is somewhat annoying. There should be a free text box to write the purpose of the transfer when transferring from a savings account to a current account. It is important for me to know the purpose of withdrawing funds from the savings account to the current account for financial organization purposes…	ar	application beautiful lack essential feature absence feature somewhat annoy free text box write purpose transfer transfer savings account current account important know purpose withdraw fund savings account current account financial organization purpose currently transfer multiple time savings account current account return find purpose transfer cause inconvenience hope text box add quickly would…	Negative	App Store	1	1	0
App Store	3b7a152b-f84f-4fb0-baa4-8cabdd59721f	PIERRE.MA52	4/24/23 2:50	تطبيق سيئ				en	sa	riyad-bank	Because of this bad program, I changed my accounts to a different bank other than Riyadh.	ar	bad program change account different bank riyadh	Negative	App Store	1	0	0
App Store	d7ffc5ea-4c6b-4e41-b1d7-604b912c88bf	Alkadash	4/18/23 3:59	مشكله التحويل				en	sa	riyad-bank	An easy-to-use application, but for a long period of time, I have been suffering from the problem of transferring between accounts. I have consulted the bank and contacted them, but there is no solution to the problem. Is there any solution, or should I change the bank?	ar	easytouse application long period time suffer problem transfer account consult bank contact solution problem solution change bank	Negative	App Store	1	0	0
App Store	ae0f41e4-9b8f-48a4-bd88-adef6d714f52	بنك الرياض +	4/17/23 2:49	من هوا اسؤا مصرف ؟				en	sa	riyad-bank	Who are the worst banks in dealing with? And who provides the worst services? And who are the worst banks in terms of development?	ar	bad bank deal provide bad service bad bank term development	Negative	App Store	1	0	0
App Store	5ab63349-4541-4854-9ec4-ad0c9b9787cf	Abo lila	3/16/23 18:21	أزدان جمالًا مع رعاية الهلال وازداد فخامة				en	sa	riyad-bank	It became more beautiful with the sponsorship of Al-Hilal and increased in grandeur	und	become beautiful sponsorship alhilal increase grandeur	Positive	App Store	0	0	0
App Store	3bfd558e-07e2-4591-8900-3a8a9d311ae9	ab23837	4/8/23 10:30	بنك فاشل جدا لابعد درجة				en	sa	riyad-bank	The rating is 0 and the quality of service is 0.	ar	rat quality service	Negative	App Store	1	0	0
App Store	0a403c27-9869-47d8-9013-418039b268ef	سليمان من السعودية	4/4/23 4:34	التطبيق لا يعمل				en	sa	riyad-bank	What is your problem with location tracking and why does the app not work?	ar	problem location track app work	Negative	App Store	0	1	0
App Store	7bda41a3-23df-4118-8836-e85b4eae695b	b.kajffk	3/30/23 0:11	سيء				en	sa	riyad-bank	Very bad, the worst application and the worst services I have ever seen in my life.	ar	bad bad application bad service ever see life	Negative	App Store	1	0	0
App Store	dcd624d4-80c0-4119-8447-33a1c773d3d5	abdullah al-mubark	3/27/23 7:35	تطبيق بنك الرياض				en	sa	riyad-bank	Why should the website be shared in order to use the application?	ar	website share order use application	Neutral	App Store	0	1	0
App Store	bc0d8429-cb41-473a-a830-6355986996d6	iryt00	3/17/23 15:17	احمد				en	sa	riyad-bank	The new update will include a hidden beneficiary addition???	ar	new update include hide beneficiary addition	Neutral	App Store	0	1	0
App Store	0fe290c5-c154-4c5e-b9a0-1d6a65a156d9	ابو نوره الشارخ	2/14/23 14:38	افضل بنك				en	sa	riyad-bank	Honestly, I have transferred my debt from SABB Bank to Riyadh Bank at a lower interest rate. Riyadh Bank is currently my primary bank, and it has also become a sponsor of the "Hilali" entity ðððð.	ar	honestly transfer debt sabb bank riyadh bank low interest rate riyadh bank currently primary bank also become sponsor hilali entity	Neutral	App Store	1	1	0
App Store	69ed1716-c2a8-4951-9ab8-a8b1182e3cd1	خالدي911	3/2/23 17:45	يحتاج تحديث				en	sa	riyad-bank	If I apply for a loan, the company's name doesn't come up, it gets stuck in the search. I hope there will be an update for it.	ar	apply loan company name doesnt come get stick search hope update	Neutral	App Store	0	1	1
App Store	964bdd3e-eb0d-4d16-93d6-fcf710c208c6	ahmad alshaikh 84	2/28/23 8:58	تعليق				en	sa	riyad-bank	The new update fixes many bugs.	ar	new update fix many bug	Positive	App Store	0	1	0
App Store	8fccf3fd-8462-4d1b-99a6-3a244ffc631e	Ghanim derman	2/26/23 21:58	بطيء وثقيل جداً جداً	{'id': 16396111, 'body': 'عميلنا العزيز، نأمل منك التواصل معنا على الرقم 920002470 وتزويدنا بملاحظاتك.', 'modified': '2020-07-04T06:01:30Z'}			en	sa	riyad-bank	The worst and heaviest application in the world. Very very bad. ð¡ð¡ðð¼ðð¼ðð¼	ar	bad heavy application world bad	Negative	App Store	1	0	1
App Store	96ede199-2ef2-4183-99a7-7de430a4044f	zxasqw.1422	2/26/23 5:51	ابلكيشن جربان				en	sa	riyad-bank	The application Jabran is experiencing no issues in card withdrawals. There are also no issues with the username and user name. Imagine changing the password and I am more than sure about it, possibly more than three times a week. There are no problems with entering the application, registration, and...	ar	application jabran experience issue card withdrawals also issue username user name imagine change password sure possibly three time week problems enter application registration	Positive	App Store	0	1	0
App Store	ac4c77b7-1bba-4d93-ba0a-dfd270e37c1b	dina mond	2/25/23 22:39	اخر تحديث				en	sa	riyad-bank	The latest update for the program is bad, unfortunately, and it freezes often.	ar	late update program bad unfortunately freeze often	Negative	App Store	1	0	1
App Store	938622e6-2ed7-4df9-8c01-3387c866025e	K8838	2/25/23 12:26	خيار غير مناسب				en	sa	riyad-bank	Why is the user on the website being obligated? It should not be mandatory to use a banking application.	ar	user website obligate mandatory use bank application	Negative	App Store	1	1	0
App Store	e30257cf-a310-4ff0-8d3b-734a73dfabfd	دتااننن	2/23/23 14:37	لماذا تم تفعيل الموقع				en	sa	riyad-bank	Why isn't it allowed to access the application without enabling location? Please make a modification as I do not want to enable location.	ar	isnt allow access application without enable location please make modification want enable location	Negative	App Store	0	1	0
App Store	910a50da-b3d7-4879-9b60-ab00cccd823b	almaytham	2/22/23 17:56	ملف pdf				en	sa	riyad-bank	A PDF file download should be added for operations like bill payment and government services.	ar	pdf file download add operations like bill payment government service	Neutral	App Store	0	1	0
App Store	544f694a-2607-484e-9f03-302e4ed6ad61	abusardi	2/15/23 4:35	تطبيق سيء جداً				en	sa	riyad-bank	When I try to open an account on the app and after entering all the information, it asks me to enter a password for the app. Despite following all the instructions for the password, it is not accepted on the grounds that the password is not strong enough, although the indicator measuring the strength of the password shows that the password I entered is strong! Moreover, the problem is repeated wh…	ar	try open account app enter information ask enter password app despite follow instructions password accept ground password strong enough although indicator measure strength password show password enter strong moreover problem repeat try passwords go branch ask open account app try open account app primitive problems appear	Negative	App Store	1	1	0
App Store	1935eedb-36c1-41c1-a8c9-b06dc2f8b8a5	jafasht	1/31/23 10:33	اضافة خدمة اعتقد انها تسهل امور				en	sa	riyad-bank	Peace be upon you and God's mercy and blessings. The program is easy to use and nice, and it has many features to facilitate any tasks. However, I have a suggestion that could benefit the program and enhance it further, and it could also benefit people from going to the bank. It is to add a feature in the same program that allows the user to add a camera for check imaging. This way, there would b…	ar	peace upon gods mercy blessings program easy use nice many feature facilitate task however suggestion could benefit program enhance could also benefit people go bank add feature program allow user add camera check image way would need go bank take picture check use riyadh bank program add	Positive	App Store	1	1	0
App Store	98109204-b200-40d8-b3c1-f5cd7ce3f82d	حصتن	2/11/23 22:31	الجوف				en	sa	riyad-bank	There is none.	ar	none	Neutral	App Store	0	1	0
App Store	b5c9fcad-210b-49a3-888d-277b87ec7e96	AbdullahAli	2/2/23 16:32	البطاقة الرقمية وأبل باي				en	sa	riyad-bank	Unfortunately, there is no way to add a digital card to Apple Pay from the application.	ar	unfortunately way add digital card apple pay application	Negative	App Store	1	1	0
App Store	ed22b83b-2f5b-4dd6-9783-e3465875f734	majsjjsksjsjs	1/30/23 8:01	تطبيق سيء ويعلق				en	sa	riyad-bank	The application is bad and it crashes. I added a beneficiary and it does not appear in the beneficiaries section. When I try to add them again, it tells me that the beneficiary has already been added. And when I access the personal finance section, it has another issue with crashing and poor quality. It's surprising coming from Riyadh Bank, considering the number of their employees, yet they cann…	ar	application bad crash add beneficiary appear beneficiaries section try add tell beneficiary already add access personal finance section another issue crash poor quality surprise come riyadh bank consider number employees yet compete bank applications find solution us add beneficiaries important thing want transfer money like normal people	Negative	App Store	1	1	0
App Store	ad2614fa-d80a-4225-8b72-50cb7c04ada4	Yasser 15	11/4/22 16:20	الف شكر لكم				en	sa	riyad-bank	The program has recently evolved greatly. Thank you so much, and we look forward to more from you.	ar	program recently evolve greatly thank much look forward	Positive	App Store	0	0	0
App Store	5ee8db8b-7fe3-4ed7-ace5-19d979734da5	batigoal_99	1/16/23 11:50	يقف عند اخر خطوة				en	sa	riyad-bank	In every transaction in the application, such as paying a bill, it stops at the last step, which is that you will be contacted automatically to verify the transaction.	ar	every transaction application pay bill stop last step contact automatically verify transaction	Neutral	App Store	0	1	0
App Store	2027d00a-8d80-429e-9ac1-b656d4b13a77	HawraaAlzain	1/2/23 1:10	تعليق				en	sa	riyad-bank	The application is good, but it hangs from time to time.	ar	application good hang time time	Positive	App Store	1	0	1
App Store	611756ec-8c94-4891-9919-cd9267e0c2cc	زينب ال	1/1/23 11:34	..				en	sa	riyad-bank	Worst bank.	ar	bad bank	Negative	App Store	1	0	0
App Store	f0ae2659-0d75-44ab-9223-77235e783f1a	Hassan.Elshafeey	12/29/22 20:01	سيء				en	sa	riyad-bank	Bad. The search box problem is not working in the application.	ar	bad search box problem work application	Negative	App Store	1	1	0
App Store	8b1392a3-ce21-4c29-a3e3-9f523c28e653	bnr ssdw	12/15/22 4:38	ممتاز				en	sa	riyad-bank	Excellent, I highly recommend that the Riyadh application be the best banking application before the latest update. The latest update canceled the investment option, which is a major flaw in the application. That's why I give it 3 stars. If they bring it back and add the quick login feature, it will deserve 5 stars.	ar	excellent highly recommend riyadh application best bank application late update late update cancel investment option major flaw application thats give star bring back add quick login feature deserve star	Positive	App Store	1	1	0
App Store	e5d2e4af-4e33-4491-9c7c-543b142884e5	dear77d	12/12/22 15:44	خدمة سيئة				en	sa	riyad-bank	When you come to make a time deposit, you have to go to the branch, meaning you have to register easily from the application. And when you decide to withdraw, they mistreat you.	ar	come make time deposit go branch mean register easily application decide withdraw mistreat	Negative	App Store	0	1	0
App Store	0ac905b2-4bfb-4c2b-803f-0f22ee94531c	بومحمد١٤٩	12/10/22 10:53	مشكلة				en	sa	riyad-bank	The subscription box is not available anymore. It used to be shown alongside the investment box but now it doesn't appear. Could you please fix this issue?	ar	subscription box available anymore use show alongside investment box doesnt appear could please fix issue	Negative	App Store	0	1	0
App Store	d5d17b21-0c8d-4a80-9cc4-9808f2b78a1c	غرمان	11/9/22 11:19	مشكلة بعد التحديث				en	sa	riyad-bank	He asks me to authenticate through a call and says to press number 1. But when I press number 1, the automated response does not respond. Please note that I am able to access my account through the browser. I kindly request a solution to the application problem.	ar	ask authenticate call say press number press number automate response respond please note able access account browser kindly request solution application problem	Neutral	App Store	0	1	0
App Store	ba82f974-6a0c-43b3-bb7d-0ba4187a1c0a	mod789	11/8/22 21:14	ممتاز				en	sa	riyad-bank	Beautiful	ar	beautiful	Positive	App Store	0	0	0
App Store	1abfe9ec-6124-4709-86c1-b357a6d8bee9	احمد البخيت	11/4/22 6:06	❤️❤️				en	sa	riyad-bank	My bank is Bank Al-Riyadh ð¤©â¤ï¸	ar	bank bank alriyadh	Neutral	App Store	0	0	0
App Store	df998e68-a820-4d40-ab07-c9ca0af842cc	Rx only	10/5/22 20:53	ملاحظة				en	sa	riyad-bank	Just for your information, when making transfers and saving information in PDF or image format, a blank white page appears. This has been happening for months, and I used to take a screenshot and things would work. However, with the new update, the screenshot appears black, and the old problem continues. Can you imagine not being able to send a file or an image of the transfer? Honestly, it's str…	ar	information make transfer save information pdf image format blank white page appear happen months use take screenshot things would work however new update screenshot appear black old problem continue imagine able send file image transfer honestly strange possible something notice bank developers thank	Negative	App Store	1	1	1
App Store	fdf2102f-4e10-47a3-a123-a0a2ed5b4394	ابوتركي والهنوف	11/4/22 3:53	تذكرون اضافة بعض الخدمات ولانجدها				en	sa	riyad-bank	Like adding a termination letter that is not found, and much more, the important services should be prominent, which the client needs, not what you desire.	ar	like add termination letter find much important service prominent client need desire	Negative	App Store	1	1	0
App Store	86a3ad92-f826-4ac0-9fd1-af1da80d9a2e	zah8an	10/30/22 10:01	بدائي				en	sa	riyad-bank	I hope that developers take a look at the applications of Al Rajhi, Alahli, and Alinma banks in order to realize how much the Bank Al-Riyadh application is outdated and primitive in terms of design, user interface, and usability. It feels like you are still in 2010. The bank provides excellent services but the banking application is zero.	ar	hope developers take look applications al rajhi alahli alinma bank order realize much bank alriyadh application outdated primitive term design user interface usability feel like still bank provide excellent service bank application zero	Negative	App Store	1	0	0
App Store	3e902045-720c-477d-ba3e-36b4f7d0eff5	user djdgj1	10/27/22 4:11	الدخول للتطبيق				en	sa	riyad-bank	Problems with accessing the application. It doesn't save the password or facial recognition, and I had to re-enter them three times.	ar	problems access application doesnt save password facial recognition reenter three time	Negative	App Store	0	1	0
App Store	9fb0c3fa-933c-4862-92b1-90cc6218a102	Abuwalid2016	10/25/22 15:32	ملاحظة على التطبيق	{'id': 20138247, 'body': 'عميلنا العزيز، يؤسفنا سماع ذلك ونأمل منك التواصل معنا على الرقم 920002470 أو من خلال البريد الإلكتروني \r\ninfo@riyadbank.com \r\nو تزويدنا بملاحظاتك لنتمكن من خدمتك بشكل أفضل.\r\n', 'modified': '2021-01-03T11:47:43Z'}			en	sa	riyad-bank	The new application of Bank Al-Riyadh has a problem with the subscription service as it is not available in the application. I kindly request that the bank address this issue.	ar	new application bank alriyadh problem subscription service available application kindly request bank address issue	Negative	App Store	0	1	0
App Store	6e792069-0142-4a3c-ac66-8cba4314b570	حصة الحربي .	10/20/22 13:24	رمز التفعيل بعد التحويل سيء وياخذ وقت طويل .				en	sa	riyad-bank	Peace be upon you and the mercy and blessings of Allah. The Al-Riyadh Bank program used to be one of the best programs. Recently, you added an activation code to confirm transfers. The issue is that it takes a very long time for the message to arrive. I was forced to deal with Al-Ahli Bank because of this problem, and I dislike Al-Ahli Bank. I hope you fix the issue with the activation code messa…	ar	peace upon mercy blessings allah alriyadh bank program use one best program recently add activation code confirm transfer issue take long time message arrive force deal alahli bank problem dislike alahli bank hope fix issue activation code message would preferable fingerprint would do	Positive	App Store	0	1	1
App Store	0e933454-5862-46ea-ad97-209deca0bbe4	72264996	10/18/22 7:56	مشكل واجد	{'id': 20849592, 'body': 'عميلنا العزيز، يؤسفنا سماع ذلك ونأمل منك مشاركتنا ملاحظتك عبر البريد الالكتروني info@riyadbank.com و سيتم النظر في الملاحظة بعين الاعتبار.', 'modified': '2021-02-04T06:52:49Z'}			en	sa	riyad-bank	You have overwhelmed us with updates, and every update requires us to register our fingerprints again. Find a solution for us.	ar	overwhelm us update every update require us register fingerprint find solution us	Negative	App Store	1	0	0
App Store	f82592ae-96e1-4705-b179-87ae701c984e	ابويوسف الزبير	10/11/22 4:48	صعب جداً				en	sa	riyad-bank	Why is there such difficulty in the application? If I want to activate the beneficiary, it gives me a message with eight numbers and a short time. I got tired and couldn't activate the beneficiary. Put at least four numbers or follow the example of Al Rajhi Bank application in activating the beneficiary with a "yes" or "no". May Allah bless and protect. Overall, your application is bad, I swear t…	ar	difficulty application want activate beneficiary give message eight number short time get tire couldnt activate beneficiary put least four number follow example al rajhi bank application activate beneficiary yes may allah bless protect overall application bad swear god	Negative	App Store	1	1	0
App Store	2e983627-f2d9-40c1-bda6-d817e5b62424	a1i_9	10/10/22 13:00	بصمة الوجه				en	sa	riyad-bank	Every time I activate the feature and enter again, it tells me that I have to activate it.	ar	every time activate feature enter tell activate	Neutral	App Store	0	1	0
App Store	e717965a-fbde-4cbe-a304-093a51e3a7b3	آبومشعل العامري	10/1/22 15:40	شكرا بنك الرياض				en	sa	riyad-bank	The application is very easy and all categories of society use it. There is a very simple problem, why not have an account for dependents from within the application itself, such as the spouse and children regardless of age, in order to facilitate switching between accounts.	ar	application easy categories society use simple problem account dependents within application spouse children regardless age order facilitate switch account	Neutral	App Store	1	0	0
App Store	15ee3f4f-5bc1-49c2-91de-84967254688a	Dhif allh	10/2/22 12:43	ابغا حل هاذي المشكله				en	sa	riyad-bank	Now, after the latest update, I can no longer access the application because I no longer receive a text message. If there is a solution, I hope someone will respond.	ar	late update long access application long receive text message solution hope someone respond	Negative	App Store	0	1	0
App Store	73aadb30-1ad5-4e2b-99c1-4f0d62169588	rooorreee	10/2/22 7:56	بنك				en	sa	riyad-bank	The application is bad and the service is terrible.	ar	application bad service terrible	Negative	App Store	1	0	0
App Store	112975c5-8fbe-4599-847d-5001456d6a4b	rere25252	10/1/22 18:31	ممتاز بس عيب واحد				en	sa	riyad-bank	It is sweet with many things, and implementing it properly is smooth compared to other applications, but one issue is that if you open it and try to access it with a card it gets declined, which is a bad idea if it was an idea.	ar	sweet many things implement properly smooth compare applications one issue open try access card get decline bad idea idea	Negative	App Store	1	1	0
App Store	38e04d3e-37f4-45dd-ba6d-2ba033955e32	MazenAtrk	10/1/22 17:06	تطبيق سيىء				en	sa	riyad-bank	A very bad application, if it weren't for the university reward being downloaded on it, I would never have used it again.	ar	bad application werent university reward download would never use	Negative	App Store	1	1	0
App Store	b503d731-4ff5-426c-9778-ec2485b95d78	Ramadan_7877	9/30/22 11:42	لا يمكن الدخول				en	sa	riyad-bank	After the update, logging in is not possible.	ar	update log possible	Negative	App Store	0	1	0
App Store	56218155-aad5-4ebb-b138-10407df66e4c	‏الكحيلي	10/1/22 13:22	شگـړ‎ لـگًم و تقدير ۔				en	sa	riyad-bank	Hello guys, how are you? By God's will, you're doing well. But you need to check out the issue of self-service devices in Makkah, they are few. Also, the Noor branch has few employees. The bank's phone service is good though. But I wanted to contribute, even if it's a little. But bravo to you.	ar	hello guy gods youre well need check issue selfservice devices makkah also noor branch employees bank phone service good though want contribute even little bravo	Positive	App Store	1	0	0
App Store	4e9014b6-1be7-48e0-abb6-42cd8b447df1	al,sultan	9/30/22 15:09	اقتراح				en	sa	riyad-bank	Adding what is related to lease-purchase cars in the application, even if it is for a trial period. Thank you.	ar	add relate leasepurchase cars application even trial period thank	Neutral	App Store	0	1	0
App Store	caf1fc56-6089-49dd-92f9-749920ae1df7	saleh alfa	9/25/22 8:46	بخصوص التطبيق				en	sa	riyad-bank	Most banks use quick login in their application, except for Al-Riyadh Bank. It's strange, honestly, it takes a long time to log into the application. Please update it and add quick login.	ar	bank use quick login application except alriyadh bank strange honestly take long time log application please update add quick login	Negative	App Store	1	0	1
App Store	559dc627-42a1-4e6d-9761-f821deb1ca91	Hbtha	9/12/22 18:42	تطبيق كويس				en	sa	riyad-bank	But the bank isn't like that anymore.	ar	bank isnt like anymore	Neutral	App Store	1	0	0
App Store	77815543-277a-4c98-a74f-4a68ccc924e1	صابر عبدالصبور	9/22/22 19:34	القنوات الرقمية				en	sa	riyad-bank	An old application that hangs frequently and takes more than 48 hours to activate.	ar	old application hang frequently take hours activate	Negative	App Store	1	0	1
App Store	1b067e77-4ffa-46d4-8eb1-1c861391331a	omkmojl	7/29/22 15:12	مافي تحسين				en	sa	riyad-bank	Why doesn't the application have a quick login with money?	ar	doesnt application quick login money	Negative	App Store	0	1	0
App Store	374d41f5-26ca-487a-b64b-ca5c82d020d6	Almasrdii	9/1/22 12:59	تجميد جزء من حسابي				en	sa	riyad-bank	The bank's indifference and abysmal failure in collecting people's rightful dues, as well as the injustice in dealing with them, in addition to the annoying behavior they subject you to... I strongly advise not to deal with this terrible bank under any circumstances.	ar	bank indifference abysmal failure collect people rightful dues well injustice deal addition annoy behavior subject strongly advise deal terrible bank circumstances	Negative	App Store	1	1	0
App Store	c2bfe733-4a3e-4137-8467-f3f6a4dcfe25	م شاء الله يختصر عليك كل شي	8/31/22 20:31	حل مشكله كشف الحساب				en	sa	riyad-bank	Accounting reveals if you were afraid of someone and then they return, it's like starting all over again. I don't know if they pretend to do it or they have no morals.	ar	account reveal afraid someone return like start dont know pretend morals	Negative	App Store	1	0	0
App Store	11a72eab-f11a-4be4-a191-a3160c91be00	s_s_e	8/31/22 11:37	خدمة عملاء سيئه جداً				en	sa	riyad-bank	They call them but they don't answer, and the application freezes, and everything is bad in this bank.	ar	call dont answer application freeze everything bad bank	Negative	App Store	1	0	1
App Store	a6bcf5d0-8353-4ee7-88d7-9e9d115c152a	بونورهه888	8/30/22 9:00	حذفت البرنامج مو قادر احمله ثانيه				en	sa	riyad-bank	The application is frozen and does not accept the password. I deleted it to download it again, then it asks for iCloud and then asks for my phone number and credit card information to charge for the application. What is the solution?	ar	application freeze accept password delete download ask icloud ask phone number credit card information charge application solution	Negative	App Store	0	1	1
App Store	c8ffcc9d-ecd0-4437-8b0e-83f31fe3e1e0	👎👎👎??	8/22/22 14:46	خدمة سيئه				en	sa	riyad-bank	The application is bad, for a long time I have not been able to access previous transactions. When I press the account to view previous transactions, the application completely freezes.	ar	application bad long time able access previous transactions press account view previous transactions application completely freeze	Negative	App Store	1	1	1
App Store	c368085f-c399-4bc3-a96a-f967f4d08bf5	967000000000	8/13/22 15:55	توقف الحساب				en	sa	riyad-bank	I opened an online account, it only took 3 minutes to open the account, honestly it was fast. The bank card also arrived the next day directly. But on the third day, the account was closed without any reasons. I contacted technical support and they said go to the branch, where is the digital service? What's the point of sending a bank card? I have been using Al Ahli Bank for four years, I have ne…	ar	open online account take minutes open account honestly fast bank card also arrive next day directly third day account close without reason contact technical support say go branch digital service whats point send bank card use al ahli bank four years never visit branch except never problems way open account alinma bank didnt need visit branch everything work fine also bank al bilad need try bank a…	Neutral	App Store	0	1	1
App Store	9030a6ae-5544-49d5-9886-da888c8985dc	ahad ibrahim	7/31/22 7:28	التطبيق				en	sa	riyad-bank	The application is very bad. Every time I open my account on it, the account gets deleted. When I try to recover it, the same problem keeps happening and the account doesn't open.	ar	application bad every time open account account get delete try recover problem keep happen account doesnt open	Negative	App Store	1	1	0
App Store	ec7be33e-1165-4725-9d8e-557fb9f0c30f	Abdullah_q2	7/18/22 6:04	يعلق كثير				en	sa	riyad-bank	The application hangs in some places and does not work at all.	ar	application hang place work	Negative	App Store	0	1	1
App Store	591d7ed8-a6b4-4e43-990b-10c68718e2f2	MoOoD09	6/17/22 14:18	من اسهل التطبيقات				en	sa	riyad-bank	Excellent	ar	excellent	Positive	App Store	0	0	0
App Store	0138fe1b-fca8-445f-939d-7ae1482f9e8d	badr_ma305	7/1/22 17:41	سيي جدا				en	sa	riyad-bank	Very cold	ar	cold	Neutral	App Store	1	0	0
App Store	203f8e6b-954c-4ddf-8cfe-73882816c9d1	Azzaxm	6/30/22 14:37	مشكلة دفع				en	sa	riyad-bank	If I open the application and I try to pay with Apple Pay, it gets declined and the reason is exiting digital channels. Then I have to wait for half an hour until I can pay. I hope you can find a solution.	ar	open application try pay apple pay get decline reason exit digital channel wait half hour pay hope find solution	Negative	App Store	0	1	0
App Store	d42ef220-157c-4cab-8538-d8271bd295a7	hoa1m	6/30/22 11:44	اعادة كلمة السر				en	sa	riyad-bank	I am sure about the password, but it says it's incorrect. I tried changing it and everything seems fine until I call the Riyadh number and choose one, and he says he cannot help you.	ar	sure password say incorrect try change everything seem fine call riyadh number choose one say help	Negative	App Store	0	1	0
App Store	93f3dd5a-7188-4864-a19e-2db69fa9237f	achyyj	6/26/22 14:13	اسواء بنك ما انصح فيه😑				en	sa	riyad-bank	Every Friday they have maintenance, and I wish something would change and make you doubt yourself because of how obsessed it is. Suddenly it tells you the wrong password and username, and changes it a million times, and the same thing happens, it just frustrates you, I didn't like it at all.	ar	every friday maintenance wish something would change make doubt obsess suddenly tell wrong password username change million time thing happen frustrate didnt like	Negative	App Store	1	1	0
App Store	a4cf5e44-b5a7-4a35-926e-fadcb6cccfa7	batatooo	6/22/22 12:05	حذف ابل باي				en	sa	riyad-bank	Why did you delete Apple Pay? It was very convenient.	ar	delete apple pay convenient	Negative	App Store	0	1	0
App Store	952c286b-79c3-4728-8fde-698c7a6ddbe1	SULUMAN ALHARBI	6/20/22 10:57	تطبيق فاشل جدا				en	sa	riyad-bank	Unfortunately, the application is very bad. Every time I try to access my bank account, it refuses to log in, claiming that the password is incorrect. I have changed my password more than four times, and it still refuses. I have to change my password again, and the quick login is also very slow. The application also freezes. Learn from Al-Rajhi Bank services on how to provide better service to cu…	ar	unfortunately application bad every time try access bank account refuse log claim password incorrect change password four time still refuse change password quick login also slow application also freeze learn alrajhi bank service provide good service customers	Negative	App Store	1	1	1
App Store	3722cae1-46f7-4397-9f1a-612007bb2488	mnsourtex	6/17/22 16:46	التحديث الاخير مو شغال كان اول احسن.				en	sa	riyad-bank	The latest update is not working. I transferred money and it didn't arrive. The previous version was better.	ar	late update work transfer money didnt arrive previous version good	Negative	App Store	0	1	0
App Store	8d7bcda4-e9a9-481f-8190-a9baf540907e	dr-doaa ali	6/13/22 5:31	سوء الخدمه				en	sa	riyad-bank	Unfortunately, the worst service, they do not know how to deal and never solve anything and they tell you that customer service will contact you. I am very, very, very regretful to have dealt with them and I filed a complaint against them because I fell into a trap and they make promises but do not solve the problem, instead they worsen it. What a disappointment in this bank and the employees who…	ar	unfortunately bad service know deal never solve anything tell customer service contact regretful deal file complaint fell trap make promise solve problem instead worsen disappointment bank employees understand anything even technology	Negative	App Store	1	1	0
App Store	4b5a26dc-a557-47f9-9221-bd74f8b8ecd2	لعيون خالد	6/9/22 4:52	اخيس بنك				en	sa	riyad-bank	treats	ar	treat	Neutral	App Store	0	1	0
App Store	41d4e5b9-a099-4764-85e1-f7aa38b67fdc	Abukhled	5/28/22 11:02	تقييم التطبيق لبنك الرياض				en	sa	riyad-bank	Excellent and all services are available with no delays or malfunctions.	ar	excellent service available delay malfunction	Positive	App Store	1	1	1
App Store	e7f42598-75f7-4be7-99d1-f6097e6fcc48	Manson.t	5/31/22 20:03	التحديث سئ جدا				en	sa	riyad-bank	Apple Pay cannot be used easily like before and payment is disrupted.	ar	apple pay use easily like payment disrupt	Negative	App Store	0	1	0
App Store	c51a8af5-521b-4b3e-9b43-13e4f3d0460d	حلوة جداداذا	5/28/22 15:36	ا				en	sa	riyad-bank	If only I had two million like it.	ar	two million like	Positive	App Store	0	0	0
App Store	b67d8edc-2baa-4750-8d79-9ff0441ae7f6	0q3z	5/19/22 23:35	السلام عليكم ورحمه الله وبركاته				en	sa	riyad-bank	The application was initially beautiful and excellent, but recently there have been many problems, including the fact that the services are not available at the moment. Also, if I receive a transfer from someone and everything is ready, I am surprised to find that it has not been credited to the card yet. I only hope that you fix these simple things. Thank you and appreciate your efforts. ð	ar	application initially beautiful excellent recently many problems include fact service available moment also receive transfer someone everything ready surprise find credit card yet hope fix simple things thank appreciate efforts	Negative	App Store	1	1	0
App Store	5f32ff8e-d5fa-4c0c-a5ad-35e4b9790834	gfhuuu	5/27/22 14:31	تطبيق اكثر من فاشل				en	sa	riyad-bank	The application is, to say the least, the worst. I wish you could learn from other applications. Look at Al Rajhi Bank's application, it is more than wonderful. You have a problem with the quick fingerprint login, a problem that has not been resolved for over a year. When you use the quick fingerprint login, it permanently cancels the fingerprint and you have to register again.	ar	application say least bad wish could learn applications look al rajhi bank application wonderful problem quick fingerprint login problem resolve year use quick fingerprint login permanently cancel fingerprint register	Negative	App Store	1	1	0
App Store	ddf02488-c675-4ef4-b225-0944272d19c8	SAMI.M.H.	5/27/22 12:12	تطبيق سيء للغاية				en	sa	riyad-bank	1- You can only inquire about the early settlement amount by visiting the branch. 2- You can only cancel the credit card by visiting the branch. 3- You can only transfer from the savings account to the personal account through the website. 4- The transfer fee from this bank to a local bank is high compared to other banks.	ar	inquire early settlement amount visit branch cancel credit card visit branch transfer savings account personal account website transfer fee bank local bank high compare bank	Neutral	App Store	0	1	0
App Store	c11ca1eb-a4a4-4c9c-a759-16b7418e6a0c	Bo6l8	5/26/22 23:35	تطبيق فاشل				en	sa	riyad-bank	The worst and constantly frozen application that does not show me what I want in terms of transfers, bill payments, and a lack of response from customer service.	ar	bad constantly freeze application show want term transfer bill payments lack response customer service	Negative	App Store	1	1	1
App Store	ff25f600-a8a8-43f1-98f2-fcdfee1c4b1e	RaKaaaN69	5/25/22 22:17	افشل خدمات تحصلها بالبنك هذا				en	sa	riyad-bank	It is not worth even a quarter of the second-ranking banking star. It is declining while the other banks are progressing. On payday, when I try to pay my accumulated bills through the application, I don't find any account for my bills, it's all deleted. There is no mobile phone, no electricity, no water, and no loan. All I can say is may God give me patience during this period and deliver me from…	ar	worth even quarter secondranking bank star decline bank progress payday try pay accumulate bill application dont find account bill delete mobile phone electricity water loan say may god give patience period deliver	Negative	App Store	1	0	0
App Store	03274766-5d29-49a0-97dc-901e1abf936c	adeel hazazi	5/25/22 20:15	لمستخدمي تطبيق بنك الرياض وبنك الرياض				en	sa	riyad-bank	Is there a business application like Al Rajhi or not and I hope you can help me. There is an application called "Mobile Riyadh" from the same Riyadh Bank, but it is not downloading. It says "Sorry, the application cannot be downloaded because it is not available in your city or region. Can you explain why?	ar	business application like al rajhi hope help application call mobile riyadh riyadh bank download say sorry application download available city region explain	Negative	App Store	0	1	0
App Store	b2ae8d50-618b-4e41-83b7-0b980d856029	Khaled544	5/12/22 14:43	تصميم التطبيق متعب للنظر				en	sa	riyad-bank	The application needs to be redesigned as it is very tiring to look at in terms of colors and fonts. Additionally, the service of printing a stamped IBAN form is not available. Other banks provide many services in their applications that are not available in the Riyadh application.	ar	application need redesign tire look term color fonts additionally service print stamp iban form available bank provide many service applications available riyadh application	Negative	App Store	1	0	0
App Store	d280531d-a7d0-4bf8-a7f5-75c47d18efec	طاطاتطتثهثن	5/10/22 23:42	افشل بنك في العالم نصيحة ابعدو عنه				en	sa	riyad-bank	The worst bank with no management, no cooperation, and no anything.	ar	bad bank management cooperation anything	Negative	App Store	1	0	0
App Store	f1edd8de-60ec-4629-a44f-7eeaab9310ae	عبدالله997	5/8/22 0:08	!!!				en	sa	riyad-bank	Very bad application .. I enter the password and it says error, even though I have changed it multiple times.. Even the quick login is not working properly.	ar	bad application enter password say error even though change multiple time even quick login work properly	Negative	App Store	1	1	0
App Store	a64bd19a-9342-498c-9445-5a1f75b6b5a2	mneera aziz	4/26/22 23:24	فاشل				en	sa	riyad-bank	The worst application that always freezes and the face recognition always disappears. I hope for a better quality.	ar	bad application always freeze face recognition always disappear hope good quality	Negative	App Store	1	0	1
App Store	fd1c9d9c-4a7e-4d70-9b94-bc2f3ced7b34	البنتليس	4/25/22 12:12	الرياض - 22804159046				en	sa	riyad-bank	One of the worst treatments and worst services I have ever experienced is the car financing service from Bank Al-Riyadh. The employees are extremely careless and manipulative, there is no management that the client can refer to, and there is a complete lack of credibility. I would never recommend it. In short, the bank employee just wants to finish your transaction, and you have no option but to …	ar	one bad treatments bad service ever experience car finance service bank alriyadh employees extremely careless manipulative management client refer complete lack credibility would never recommend short bank employee want finish transaction option file complaint bank phone service complaint process take days	Negative	App Store	1	1	0
App Store	6eb95f56-8ada-4d01-aad3-1ae6fe6422e0	mohammed12335	4/13/22 14:12	اتمنى تحلون المشاكل الي بالتطبيق				en	sa	riyad-bank	I have two electronic accounts and I want to transfer from the first account to the second. I want to see how much is in it and if there is any problem with transferring from left to right. It is unreasonable that our interests are disrupted because of your unjustified errors. I hope you solve the problem.	ar	two electronic account want transfer first account second want see much problem transfer leave right unreasonable interest disrupt unjustified errors hope solve problem	Negative	App Store	1	1	0
App Store	096938c2-bc89-4ab5-83d7-180a519e9b13	Mohammed?!	4/2/22 13:47	بصمة الأصبع!				en	sa	riyad-bank	More than once, I register my fingerprint to enter, then when registering, it asks for a text message!	ar	register fingerprint enter register ask text message	Neutral	App Store	0	1	0
App Store	ff9d0715-41a0-4216-8a09-5db76d6ae523	k.t.h95	3/31/22 23:17	دخول سريع فاشل بشكل مزعج				en	sa	riyad-bank	Every time I open the app, it asks me to activate fingerprint.	ar	every time open app ask activate fingerprint	Neutral	App Store	0	1	0
App Store	7f6a7803-7d00-4c4c-82ae-c0068ddda7df	anfalr	3/31/22 13:12	تطبيق اقل من التوقعات				en	sa	riyad-bank	The application is extremely bad and not user-friendly. It is difficult to navigate and I hope that you look into it, improve it, and consider contracting with better development companies or hiring competent Saudi developers to enhance it.	ar	application extremely bad userfriendly difficult navigate hope look improve consider contract good development company hire competent saudi developers enhance	Negative	App Store	1	0	0
App Store	2696a10f-74fc-4b7a-8304-dc2bd7070674	عبد المجييد البارقي	3/30/22 8:44	اسوا بنك فالتاريخ				en	sa	riyad-bank	Stay away from him as much as possible.	ar	stay away much possible	Neutral	App Store	1	0	0
App Store	4de506db-144b-4313-8971-ede3be60ce3d	صالح مرتجي	3/29/22 16:13	برنامج عقيم من ناحية الدخول السريع مقارنه بباقي البنوك				en	sa	riyad-bank	A sterile program in terms of fast access compared to other banks.	ar	sterile program term fast access compare bank	Neutral	App Store	1	1	0
App Store	0b3ebd21-a6ac-435d-90cd-a442dc1f7752	Moataz AlThaqib	3/28/22 7:23	سيء جداً				en	sa	riyad-bank	Very bad	ar	bad	Negative	App Store	1	0	0
App Store	ec0fe8ea-e34a-4f08-bb6d-e7bf9bdd5278	مرعي مكلبش	3/26/22 11:51	شكراً من القلب😘♥️🙏🏻🌸				en	sa	riyad-bank	Thank you for everything you have done. You have truly gone above and beyond in your service. Your kindness and good manners are enough to show your exemplary behavior. I have been a customer of Bank Al-Riyadh for many years and I am impressed by and very satisfied with all of you. I extend my sincere thanks, appreciation, and praise to you. I also wish and pray for your well-being and goodness. …	ar	thank everything do truly go beyond service kindness good manners enough show exemplary behavior customer bank alriyadh many years impress satisfy extend sincere thank appreciation praise also wish pray wellbeing goodness love admiration brother admirer mari maklabash	Positive	App Store	1	0	0
App Store	88aa9000-91df-48e0-b17f-1318155af36b	أٍنــِˆ⌣ˆـُآ	3/26/22 9:36	تقييم				en	sa	riyad-bank	Thank you for the excellent services in Riyadh.	ar	thank excellent service riyadh	Positive	App Store	0	0	0
App Store	54095cf7-7ed8-4cfd-bd6f-f998dd7eca21	حسين المبارك	3/25/22 16:51	الخدمة الالكترونية ممتازة				en	sa	riyad-bank	Easy to use, fast, and makes banking easily accessible with convenience and ease.	ar	easy use fast make bank easily accessible convenience ease	Positive	App Store	0	0	0
App Store	6df77241-2917-4da8-8de3-5b9d2340e575	Veryyyy nice	3/25/22 21:41	مشكلة				en	sa	riyad-bank	The problem is that the account statement does not appear. It says to check the network. Please solve the problem, and I have a network and everything.	ar	problem account statement appear say check network please solve problem network everything	Negative	App Store	0	1	0
App Store	9278423f-bb51-42d3-80cb-f83ffaa694f4	maaly3d	3/25/22 18:44	التحويل				en	sa	riyad-bank	The transfers in the program are difficult, make it like Al-Rajhi's account with ease.	ar	transfer program difficult make like alrajhis account ease	Neutral	App Store	1	0	0
App Store	4dcebe53-ec43-4fb1-8d08-4ed76cebead8	منيره ٢٠٢١	3/25/22 9:36	بعد التحديثات الاخيرة اكثر من رائع				en	sa	riyad-bank	Excellent, the latest update to Al-Riyad Bank!	ar	excellent late update alriyad bank	Positive	App Store	0	0	0
App Store	fe747450-497a-4bb0-9111-cea4cd9bea8c	Mike-Do-502	3/24/22 23:01	التطبيق في تطور للافضل				en	sa	riyad-bank	Finally, Al Riyadh Bank has awakened from negligence. Honestly, compared to the past, Al Riyadh has changed for the better by 100%. They just need to dismiss some employees who mistreat customers.	ar	finally al riyadh bank awaken negligence honestly compare past al riyadh change good need dismiss employees mistreat customers	Positive	App Store	1	0	0
App Store	f10532a5-ec81-4a9e-9a5e-253c13226210	Manaralmutairi	3/24/22 18:52	.				en	sa	riyad-bank	One of the best banks and their application is excellent.	ar	one best bank application excellent	Positive	App Store	0	0	0
App Store	58741a4a-f7db-4b4e-83d6-91914fd99887	فنان. ابداع	3/24/22 9:33	Nice				en	sa	riyad-bank	A very beautiful and competitive application compared to other banks.	ar	beautiful competitive application compare bank	Positive	App Store	1	0	0
App Store	fe7294ac-1e6e-48ad-8448-1615cd6ba417	Mahmoudbk	3/24/22 17:20	دخول مختصر				en	sa	riyad-bank	I hope to enhance the application so that it can be accessed either through fingerprint only or through a 4-digit code like a PIN code. However, the application is very good overall.	ar	hope enhance application access either fingerprint digit code like pin code however application good overall	Positive	App Store	1	0	0
App Store	8d924fd8-2ff8-4804-aa39-83a8ad9137af	ابوخالد فلاح الخالدي	3/24/22 8:06	بنكي				en	sa	riyad-bank	The bank is excellent... The branch in Dumah Al-Jandal needs more knowledgeable and aware employees. The women's section is not operational at the branch in Dumah Al-Jandal. I know that this place is designated for evaluating the program, but perhaps the management should be informed about this issue. The only bank in the province that serves many villages and centers and has women's services is …	ar	bank excellent branch dumah aljandal need knowledgeable aware employees womens section operational branch dumah aljandal know place designate evaluate program perhaps management inform issue bank province serve many villages center womens service al rajhi bank	Neutral	App Store	1	0	0
App Store	d19b128e-bcce-45a4-bf23-7c33b490d285	للجنون عنوان	3/24/22 5:39	برنامج سهل جداً				en	sa	riyad-bank	A very easy-to-use program with no complications.	ar	easytouse program complications	Positive	App Store	1	1	0
App Store	10879ee9-9fb1-4dd1-8e91-61deccb5076b	sara clody koka	3/24/22 5:32	Dammam				en	sa	riyad-bank	Sara cloudy	en	sara cloudy	Neutral	App Store	1	0	0
App Store	f3309fac-6b41-4063-8fed-27ba5990d4bc	Mika580	3/23/22 20:24	ممتاز				en	sa	riyad-bank	The application is amazing and easy to use and convert ðð	ar	application amaze easy use convert	Positive	App Store	0	0	0
App Store	81111c37-d25c-43a0-85c7-b9b98e570250	ابو غياض	3/23/22 15:47	بنكي بنك الرياض				en	sa	riyad-bank	The best bank to deal with.	ar	best bank deal	Positive	App Store	0	0	0
App Store	d7c918d4-c8cd-4f04-95f4-cae50670aef0	yara alajmi	3/22/22 22:04	Yara alajmi				en	sa	riyad-bank	Thanks	en	thank	Positive	App Store	0	0	0
App Store	b03ca580-44b7-4c9c-aac1-b96a8a3eb3e0	سمات الشرق	3/23/22 13:42	الشرقية				en	sa	riyad-bank	The interface needs improvement because its appearance has taken a little time.	ar	interface need improvement appearance take little time	Neutral	App Store	1	0	1
App Store	65365cdf-8578-489e-ac56-795f14bd16c4	أبو رائد المدخلي	3/22/22 8:50	تطبيق بنك الرياض				en	sa	riyad-bank	Very wonderful ð¸	ar	wonderful	Positive	App Store	0	0	0
App Store	21336f3f-bbf6-4010-9ddf-bc886b1dc96d	ريم حيدر	3/22/22 8:40	الاكتتاب والفيزا المنتهية				en	sa	riyad-bank	I deducted a star because of the subscription. The application is easy and convenient to use, but there are two points I hope you consider. I can subscribe through the application, but selling can only be done through an exchange, which complicates the process for me. We hope that selling can be made easier through the application. The second point: Refunding the remaining amount on the expired v…	ar	deduct star subscription application easy convenient use two point hope consider subscribe application sell do exchange complicate process hope sell make easy application second point refund remain amount expire visa hope also do application	Neutral	App Store	1	1	0
App Store	a21339ab-c7f2-4701-be04-961b31408940	ابو٢علي	3/21/22 19:00	الرياض				en	sa	riyad-bank	Excellent, thank you, Riyadh Bank.	ar	excellent thank riyadh bank	Positive	App Store	0	0	0
App Store	3fcd4e05-f9af-483f-bdb0-500de2bb1e7a	vhudy__900	3/21/22 20:46	السوق الاكتروني				en	sa	riyad-bank	There is no online market or some features that exist in some banks.	ar	online market feature exist bank	Neutral	App Store	1	1	0
App Store	4b1cf24f-7ee0-4692-827a-6901837aa44e	ahmedkudu	3/21/22 10:58	شكرا لكم				en	sa	riyad-bank	A very beautiful and easy application.	ar	beautiful easy application	Positive	App Store	0	0	0
App Store	0da769a5-ea02-4838-8d90-4edaa9899a1d	حسين ال محروظ	3/21/22 13:53	ملاحظة				en	sa	riyad-bank	I would like the application to be in a security mode for protecting customer accounts from financial fraud. I also want there to be continuous updates to protect customers on a weekly basis.	ar	would like application security mode protect customer account financial fraud also want continuous update protect customers weekly basis	Neutral	App Store	0	1	0
App Store	677c56e5-4218-454d-9c20-ca3fee0c1167	ابو متعب التويجري	3/21/22 7:14	.				en	sa	riyad-bank	Ease of use.	ar	ease use	Neutral	App Store	0	0	0
App Store	d52324b3-51a8-420f-bded-40aea00940f9	مّوون. .	3/21/22 6:04	مبدعين يا بنك الرياض				en	sa	riyad-bank	Better than fantastic, I swear. It is the best banking application I have.	ar	good fantastic swear best bank application	Positive	App Store	0	0	0
App Store	57652e1e-1746-4940-ae15-107ca5dbf105	Jawahhergh	3/20/22 23:43	اابصمة				en	sa	riyad-bank	The fingerprint is constantly malfunctioning in the application!	ar	fingerprint constantly malfunction application	Negative	App Store	0	1	0
App Store	0b3e396c-1a8a-40b4-a27b-ef69d34aa872	radi saa	3/21/22 3:06	مشكلته اذا انرفض مبلغ يأخذ وقت على مايرجع في حسابي				en	sa	riyad-bank	The program is very smooth and easy.	ar	program smooth easy	Positive	App Store	0	0	0
App Store	bb7c0610-6807-465c-9147-b57fe98a7c13	سعود حامد الشمري	3/19/22 9:42	الفطيمان				en	sa	riyad-bank	A great bank, with everything the word implies. It cares about the customer in an unbelievable way.	ar	great bank everything word imply care customer unbelievable way	Positive	App Store	1	0	0
App Store	7e2d89e9-50c8-4407-8330-48ec6baa4447	ام لايف	3/19/22 18:49	مشكله				en	sa	riyad-bank	Every time I add a beneficiary, it turns out to be a duplicate. And when I search for it, there are no beneficiaries added.	ar	every time add beneficiary turn duplicate search beneficiaries add	Negative	App Store	0	1	0
App Store	0ea51958-b584-45dd-93ae-a3936825105b	جيد بعض الاحيان	3/19/22 18:04	يحتاج تطوير				en	sa	riyad-bank	In need of further development and streamlining of many procedures to keep pace with the advancement of electronic banks.	ar	need development streamline many procedures keep pace advancement electronic bank	Neutral	App Store	1	0	0
App Store	af6b5442-2d2f-43b4-bb4c-c06335295944	ALFAQIHY	3/19/22 10:43	إضافة مستهدم				en	sa	riyad-bank	There is some difficulty in adding users, but generally good for the general public.	ar	difficulty add users generally good general public	Neutral	App Store	1	0	0
App Store	619dd97b-e3bb-4882-bb62-ab6719977a9f	meso 😘	3/18/22 18:16	ادارة المستفيدين				en	sa	riyad-bank	The application is great and the service is excellent, but you have a problem in managing the beneficiaries. I have to go back and write the IBAN for the beneficiaries I have. What have I gained from this?	ar	application great service excellent problem manage beneficiaries go back write iban beneficiaries gain	Negative	App Store	1	0	0
App Store	aaae9ad1-e014-49e4-89a2-2ac609f93043	نايف بن فهد	3/19/22 1:42	برنامج توكن الرياض لايعمل على اجهزة الهواوي				en	sa	riyad-bank	The Riyadh Token program does not work on Huawei devices. We kindly request a solution to the problem as soon as possible, so that we can use the program on our phones.	ar	riyadh token program work huawei devices kindly request solution problem soon possible use program phone	Negative	App Store	0	1	0
App Store	d4c87026-7dae-4dd4-b597-788352e58ce4	COBRAJET 408	3/18/22 17:46	Rating				en	sa	riyad-bank	Great, but we are facing difficulty in the steps of adding a new beneficiary.	ar	great face difficulty step add new beneficiary	Negative	App Store	1	0	0
App Store	5346b1a3-d239-4f00-98cd-e58b1d8ec19e	Zasiri06	3/18/22 13:21	ابها				en	sa	riyad-bank	Sweet and the transfer is fast.	ar	sweet transfer fast	Positive	App Store	0	0	0
App Store	b5a54087-4e9e-4218-8105-8370ec5d5c00	🇸🇦🌷	3/18/22 12:36	مكة المكرمة				en	sa	riyad-bank	Al-Riyadh Bank application: Fantastic, professional, distinctive, easy to use, and provides a strong sense of security. Greetings, appreciation, and best wishes for your continued success, which is well-known about you.	ar	alriyadh bank application fantastic professional distinctive easy use provide strong sense security greetings appreciation best wish continue success wellknown	Positive	App Store	0	0	0
App Store	7b587001-f6e8-4fef-910e-0a61e54b311f	nana saad	3/18/22 13:10	المبرز / محاسن ارامكو				en	sa	riyad-bank	The application is very good. I suggest that after the client fills in the amount field using numbers, either for transfer or payment, the number automatically converts to writing in another field on the confirmation page of the transaction. Thank you very much and much appreciated.	ar	application good suggest client fill amount field use number either transfer payment number automatically convert write another field confirmation page transaction thank much much appreciate	Positive	App Store	1	1	0
App Store	f3d49112-d666-46a9-a1ce-76b2d8f7083d	العريبي	3/18/22 11:17	يوجد مشكله باظافه بصمة الوجه				en	sa	riyad-bank	There is a problem with adding face recognition, it depends on and is canceled immediately.	ar	problem add face recognition depend cancel immediately	Negative	App Store	0	1	0
App Store	8c5275ca-1668-4269-ae38-e46275c51d93	انتم كذا 👍🏻	3/18/22 8:13	شكر وعرفان وتقدير				en	sa	riyad-bank	I thank my bank, Riyad Bank, for the remarkable and successful advancements it has made. If this is any indication, it is a testament to our leaders whom may God prolong their lives. Greetings and regards from your colleague and admirer, a lover of Riyad Bank. ð¹ð¤ð½	ar	thank bank riyad bank remarkable successful advancements make indication testament leaders may god prolong live greetings regard colleague admirer lover riyad bank	Positive	App Store	1	0	0
App Store	f40fffac-4121-4cb4-9037-0ab97988916e	Abu - Othman	3/18/22 6:31	شكر وتقدير				en	sa	riyad-bank	Thank you and may Allah reward you with goodness. May Allah bless and guide you.	ar	thank may allah reward goodness may allah bless guide	Positive	App Store	1	0	0
App Store	1b21950d-8113-4be8-9e1a-398c96f2503e	bahareta	3/17/22 23:09	تطبيق جميل خاصه بعد توفر تحديث بدون رجوع للبنك				en	sa	riyad-bank	A very beautiful application.	ar	beautiful application	Positive	App Store	0	0	0
App Store	14eb55f1-b201-4bf2-8b89-db8e8c226f6c	قاريزاده	3/17/22 22:22	الشكر والتقدير				en	sa	riyad-bank	May God bless you with all goodness.	ar	may god bless goodness	Positive	App Store	1	0	0
App Store	537ee779-e795-4c44-8ca4-cff1e8f9d004	Hawas Johns	3/17/22 19:33	تطبيق الرياض سهل الاستخدام وجميع الخدمات موجوده				en	sa	riyad-bank	The Riyadh application is easy to use, all services are available and easily accessible, in addition to the high level of security provided by the application. Hawas Al Shammari, in short, is amazing.	ar	riyadh application easy use service available easily accessible addition high level security provide application hawas al shammari short amaze	Positive	App Store	1	0	0
App Store	a67a6454-f267-4796-8e99-e48c544da77a	Smr 48	3/17/22 14:57	الرياض				en	sa	riyad-bank	I request the addition of the ability to purchase gold.	ar	request addition ability purchase gold	Neutral	App Store	0	1	0
App Store	b8b28f84-870f-4c82-a296-5cb929becd01	بومعيدي	3/17/22 12:23	الاحساء .الجفر				en	sa	riyad-bank	The application is excellent.	ar	application excellent	Positive	App Store	0	0	0
App Store	9364da1c-92d1-4185-94d4-9bc504ea8664	ابوعادل الخرج	3/17/22 11:15	تطور جميل ورائع وسهولة التعامل				en	sa	riyad-bank	Something to be proud of	ar	something proud	Positive	App Store	0	0	0
App Store	b1c31948-5946-4b90-a721-02de5a79ba19	عبدالاله 5318753	3/17/22 9:27	كلمة السر				en	sa	riyad-bank	I have to change my password regularly.	ar	change password regularly	Neutral	App Store	0	1	0
App Store	826f9d51-29f2-4e7b-8752-aa331fe71e37	محمد جربوع	3/16/22 13:01	تطبيق بنك الرياض				en	sa	riyad-bank	Thank you, the application is beautiful and fantastic. It is easy for me to execute what I need without having to visit the branch. ðð¼ I have a simple suggestion to convert the username into the ID number when logging into the application.	ar	thank application beautiful fantastic easy execute need without visit branch simple suggestion convert username id number log application	Positive	App Store	0	1	0
App Store	b496e196-0b33-4916-b32b-3f8dbd7f64cd	ابو بدر 49	3/17/22 5:54	تطبيق الجوال				en	sa	riyad-bank	I hope the application will be constantly updated.	ar	hope application constantly update	Neutral	App Store	1	1	0
App Store	fd21994d-24ce-4d1e-ac7e-b56e047cc99f	Suadsalami	3/16/22 16:00	تقييم				en	sa	riyad-bank	The app is great, but there is a limitation in recharging the balance, you cannot recharge more than once. The service is great overall.	ar	app great limitation recharge balance recharge service great overall	Positive	App Store	1	0	0
App Store	dd015bdb-09d9-4e47-a413-1f232d7d8a21	omarmaarek	3/16/22 11:46	افضل البنوك في المعاملات				en	sa	riyad-bank	The best and easiest banks for online transactions.	ar	best easy bank online transactions	Positive	App Store	0	0	0
App Store	33cae8d9-90d2-44df-9bca-c6d55c34309b	.12.badr	3/16/22 11:07	الدوادمي				en	sa	riyad-bank	Thank you for the easy access.	ar	thank easy access	Positive	App Store	0	0	0
App Store	6ac7efe6-8b71-4ab4-85c7-0f9444721870	بومحمد٣٣٣	3/16/22 6:36	الاحساء				en	sa	riyad-bank	The Bank Al Riyadh application is great, but the children's token app has some notes on it: - We face difficulty in logging in. - Also difficulty in changing the password.	ar	bank al riyadh application great childrens token app note face difficulty log also difficulty change password	Negative	App Store	1	1	0
App Store	abe3a4cf-507c-407d-a531-bfc918497ebf	رقية بن عمار	3/16/22 9:39	-				en	sa	riyad-bank	The true remaining amount of personal financing does not appear.	ar	true remain amount personal finance appear	Neutral	App Store	0	1	0
App Store	dbe858ae-0a8f-4e22-9d12-fee0c20f2645	ر-ع ع	3/15/22 16:49	الخرج				en	sa	riyad-bank	The Bank Al Riyadh app is excellent, I use it most of the time. Thank you, Bank Al Riyadh.	ar	bank al riyadh app excellent use time thank bank al riyadh	Positive	App Store	0	0	0
App Store	3033e502-5334-45f5-b143-4c9730d09bc4	Fmadany	3/16/22 6:20	من افضل التطبيقات				en	sa	riyad-bank	God bless you, I forgot to mention that I want to give it a five-star rating, but I accidentally pressed four stars. If there were ten stars, I would have rated it accordingly.	ar	god bless forget mention want give fivestar rat accidentally press four star ten star would rat accordingly	Positive	App Store	1	0	0
App Store	9afd667d-67ce-4fa9-957f-1bbee54a5a09	قلبي خضر	3/15/22 13:38	افضل بنك				en	sa	riyad-bank	My best bank	ar	best bank	Positive	App Store	0	0	0
App Store	0de609e4-0ef9-4927-aef7-364d7303a8cb	ابوسمر المطيري	3/15/22 11:31	الزلفي				en	sa	riyad-bank	Thank you, Riyadh Bank.	ar	thank riyadh bank	Positive	App Store	0	0	0
App Store	298ec744-5821-4535-aac5-8c20d2d6ace4	fooz2019	3/15/22 11:21	احب التعامل مع بنك الرياض جداً جداً وسهل المعاملات				en	sa	riyad-bank	Thank you from the bottom of my heart, Bank Al Riyadh.	ar	thank bottom heart bank al riyadh	Positive	App Store	0	0	0
App Store	71ac8654-f702-4c52-80c1-ba3ec0599713	الحمدلله والله أكبر	3/15/22 7:45	الحمدلله				en	sa	riyad-bank	Special application	ar	special application	Neutral	App Store	1	1	0
App Store	9490d385-1c4f-471f-8722-c7510a6e3175	حمد ال صالح	3/15/22 6:53	افضل بنك وبالاخص فرع مكه المكرمه العوالي				en	sa	riyad-bank	The best bank, especially the branch in Mecca, Al-Awali.	ar	best bank especially branch mecca alawali	Positive	App Store	0	0	0
App Store	bcc833b3-b157-4b5e-97e1-e56ab9247035	ديمه المطيري	3/15/22 1:11	الرياض				en	sa	riyad-bank	Is there a fast login system on the application?	ar	fast login system application	Neutral	App Store	0	1	0
App Store	272f4fc4-c59d-4d5a-ba8e-9b6c699b62ef	Makati911	3/14/22 17:05	تطبيق ممتاز				en	sa	riyad-bank	Excellent and comfortable.	ar	excellent comfortable	Positive	App Store	0	0	0
App Store	c529c034-19b4-433a-a56a-10fe40c563d0	من لنا غير الله	3/14/22 20:48	تعليق التطبيق				en	sa	riyad-bank	Salary is suspended.	ar	salary suspend	Negative	App Store	0	0	1
App Store	3bbacaaf-6aab-4b88-ba91-8d71662016a4	HMA 2011	3/14/22 17:08	خطأ باستعراض عمليات الحساب	{'id': 17314848, 'body': 'عميلنا العزيز محمد، سيتم النظر في ملاحظتك بعين الإعتبار، شاكرين تواصلك معنا ', 'modified': '2020-08-17T05:51:33Z'}			en	sa	riyad-bank	The latest application update cannot display the current account process. Every time there is an update, it fixes some issues and introduces other problems. I hope you can find a permanent solution.	ar	late application update display current account process every time update fix issue introduce problems hope find permanent solution	Negative	App Store	0	1	0
App Store	199e9202-7912-4be1-8f7f-50c7a9d792a5	كيمو كمال	3/14/22 14:39	الرياض حي النسيم الشرقي شارع ابو الاسود الدولي				en	sa	riyad-bank	A very wonderful application.	ar	wonderful application	Positive	App Store	0	0	0
App Store	aa881fc2-5da6-4af6-b2a4-316c723f9411	Hussainaj	3/14/22 16:38	جميل و متكامل				en	sa	riyad-bank	The application is comprehensive and includes most, if not all, of the services. However, the only drawback is the lag that occurs when reviewing account transactions, which hinders the functionality of the application, especially before midnight.	ar	application comprehensive include service however drawback lag occur review account transactions hind functionality application especially midnight	Neutral	App Store	1	1	0
App Store	10ec265f-a022-4c51-8a7a-499a69e22143	يوسف بشرى	3/14/22 13:31	جده بحره مجمع بن لادن الصناعي الشركه السعوديه لزخرفه المعادن				en	sa	riyad-bank	"Bank Riyadh is an excellent, distinguished, and classy bank. I have recommended it to all my colleagues. Well done, Bank Riyadh, and thank you for your excellence."	ar	bank riyadh excellent distinguish classy bank recommend colleagues well do bank riyadh thank excellence	Positive	App Store	0	0	0
App Store	b66134e7-a1aa-4db0-bc81-77d0cf368f0d	مؤلف الكتاب	3/14/22 13:34	بصمة				en	sa	riyad-bank	Facial recognition doesn't work.	ar	facial recognition doesnt work	Negative	App Store	0	1	0
App Store	34b9f59c-4345-421f-8fe7-a6b1714796af	miom2509	3/14/22 12:39	شكراً لكم خدمه ولااروع				en	sa	riyad-bank	Thank you for your excellent service.	ar	thank excellent service	Positive	App Store	0	0	0
App Store	a6ac85e7-2778-499d-bbc1-571dedb9e35e	Kingarooo	3/14/22 13:10	بخصوص بطاقة الشحن				en	sa	riyad-bank	Some things I can't do easily, for example, buying a prepaid card, transferring credit, or topping up.	ar	things cant easily example buy prepay card transfer credit top	Negative	App Store	0	1	0
App Store	46988b99-db94-4ec4-b92e-b9583230a8ae	ابو نايف الدوسي	3/14/22 12:30	رائع				en	sa	riyad-bank	Excellent application that includes all my bills and is easy to use.	ar	excellent application include bill easy use	Positive	App Store	0	0	0
App Store	020a64ff-2ecf-4714-9c8d-ea6eb0ce69f3	Ahmed @@&	3/14/22 10:06	جدة				en	sa	riyad-bank	ATMs do not accept deposits outside of regular bank hours. This means that if I come after the evening prayer and I need to deposit into my account, I have to go to several branches of Al-Riyadh Bank that do not have deposit services. I kindly request that you find a solution to this problem. Thank you and regards.	ar	atms accept deposit outside regular bank hours mean come even prayer need deposit account go several branch alriyadh bank deposit service kindly request find solution problem thank regard	Negative	App Store	0	1	0
App Store	c07c36b5-e28b-4e37-933b-060b0973d91a	n-alq	3/14/22 8:54	بنك الرياض				en	sa	riyad-bank	Safe and reputable bank.	ar	safe reputable bank	Positive	App Store	0	0	0
App Store	e7eb5d67-fcfd-4243-9393-b278243f7f28	omar.b.a	3/14/22 8:04	سهل				en	sa	riyad-bank	An easy and distinctive application compared to other applications.	ar	easy distinctive application compare applications	Positive	App Store	0	0	0
App Store	f5bcd860-ed93-4fc7-8424-8063b0715f1d	Khalifa499	3/14/22 5:38	البنك متميز بخدماته				en	sa	riyad-bank	Honestly, this bank is the best bank I have dealt with. It reads my mind every time I think of making a decision regarding financing or any service. I receive a call from the customer relations department and they give me offers that are better than I expected. Thank you, Riyad Bank.	ar	honestly bank best bank deal read mind every time think make decision regard finance service receive call customer relations department give offer good expect thank riyad bank	Positive	App Store	0	0	0
App Store	049cd511-eb8e-4634-a78e-1eafc63bbe47	amona mb	3/14/22 6:45	مكه				en	sa	riyad-bank	Adding the feature of beneficiary deletion	ar	add feature beneficiary deletion	Neutral	App Store	0	1	0
App Store	f156cdfd-6825-4838-9782-0ccf80d5fae2	bo shhad	3/13/22 22:48	الشرقية الدمام				en	sa	riyad-bank	Excellent very much.	ar	excellent much	Positive	App Store	0	0	0
App Store	7632aab9-1e5a-4f27-b7e3-78b9776f6184	Sloooh353	3/13/22 22:40	مكة المكرمة				en	sa	riyad-bank	By God, the application is terrible. Every day I change the password. The facial recognition doesn't work like in other banks. The app interface is boring, it doesn't have different themes or icons to change the program's appearance like Al Rajhi and Al Ahli.	ar	god application terrible every day change password facial recognition doesnt work like bank app interface bore doesnt different theme icons change program appearance like al rajhi al ahli	Negative	App Store	1	1	0
App Store	18a7daab-d68a-4ad6-a648-d437a9ff693a	Ali safffar	3/13/22 18:14	تقييم بنك الرياض				en	sa	riyad-bank	Excellent and giving program, and I hope all banks follow its lead. However, my observation regarding Riyadh Trading is why don't they reduce the percentage of purchase and sale?	ar	excellent give program hope bank follow lead however observation regard riyadh trade dont reduce percentage purchase sale	Positive	App Store	1	0	0
App Store	296a75ef-9f1d-4885-b444-f5501014daa9	محمد الشكري	3/13/22 17:20	سهل جدا				en	sa	riyad-bank	It relieves me a lot, it has almost everything you need.	ar	relieve lot almost everything need	Positive	App Store	0	0	1
App Store	1ec049ad-9171-4945-993a-982e3bd188f7	ery sggs	3/13/22 15:53	❤️				en	sa	riyad-bank	Very beautiful and wonderful.	ar	beautiful wonderful	Positive	App Store	0	0	0
App Store	fb32ab7e-5851-45e5-8e1f-15a48fcca41f	بنت البرناوي	3/13/22 15:26	تطبيق سهل جداً وسريع اشكرهم عليه مرره				en	sa	riyad-bank	A very beautiful, easy, and fast application.	ar	beautiful easy fast application	Positive	App Store	0	0	0
App Store	55a28753-82b5-45c8-add1-78363e14b810	miamariam16	3/13/22 15:27	تطوير				en	sa	riyad-bank	Student card for Princess Nourah University, please upgrade it to make transferring from one account to another easier.	ar	student card princess nourah university please upgrade make transfer one account another easy	Neutral	App Store	0	1	0
App Store	ed549e0c-506c-4872-be49-33661daeba8d	مصطفى دياب	3/13/22 9:25	شكرًا لكم				en	sa	riyad-bank	The truth is, despite having accounts with Al Rajhi and Ahli banks, you stand out from them with Riyadh Online. It is easier to use, faster, and less complicated with quicker response. May you be rewarded for your effort.	ar	truth despite account al rajhi ahli bank stand riyadh online easy use fast less complicate quick response may reward effort	Positive	App Store	1	0	0
App Store	22cf85c9-1bf8-4710-8f8c-2b86a1982d8e	فيصل الذي ف النهار	3/13/22 11:33	بطء وسوء تنظيم				en	sa	riyad-bank	Please modify the fields and come up with a better appearance.	ar	please modify field come good appearance	Neutral	App Store	1	0	0
App Store	6c8f4d5c-10c0-4149-b7e4-ee1b08303633	nashaat877	3/13/22 6:20	سكاكا				en	sa	riyad-bank	Thank you, Bank Al-Riyadh, excellent application.	ar	thank bank alriyadh excellent application	Positive	App Store	0	0	0
App Store	8bab5a66-bd4e-4278-ba5f-53e7ef0b6a1b	محمد 123	3/13/22 8:58	تطبيق سيء				en	sa	riyad-bank	The problem is that fingerprint updates are done daily, and in each update, one thing is fixed and ten things are messed up. The application is also more difficult compared to other banks.	ar	problem fingerprint update do daily update one thing fix ten things mess application also difficult compare bank	Negative	App Store	1	1	0
App Store	d7eecb2b-926c-4233-8c86-de23f5d789dc	mahmoud_8694	3/13/22 7:49	تقيم بنك الرياض				en	sa	riyad-bank	The application lacks some things, such as the ability to request an electronic statement, not an incomprehensible account statement.	ar	application lack things ability request electronic statement incomprehensible account statement	Negative	App Store	1	1	0
App Store	868c8070-e87b-4dcc-bb15-a2c9cf82301f	AQADI	3/13/22 7:31	جميل				en	sa	riyad-bank	We need some quick shortcuts, and the app is really nice.	ar	need quick shortcuts app really nice	Positive	App Store	0	0	0
App Store	bc890ce9-ffa5-47af-936d-44817e9d7e6c	برقان البرقان	3/13/22 3:03	بنك الرياض من افضل البنوك في السعودية				en	sa	riyad-bank	Burqaan Al-Burqaan	ar	burqaan alburqaan	Neutral	App Store	1	0	0
App Store	594324c4-5311-4da9-96f6-ed3b7997d8fb	محمد89	3/13/22 1:14	التطبيق				en	sa	riyad-bank	Very, very easy.	ar	easy	Positive	App Store	0	0	0
App Store	820639f0-930e-4456-bd22-8a404102ec57	ام عبدالرحمن القحطاني	3/13/22 0:41	سهلين وسريعين حتى بالفروع				en	sa	riyad-bank	Keep going like this.	ar	keep go like	Neutral	App Store	0	0	0
App Store	fbeccbf6-24d2-4a96-b087-035e0b928192	سمر ابراهيم العبدلي	3/12/22 21:51	احبه				en	sa	riyad-bank	Thank you, thank you very much, Riyadh Bank.	ar	thank thank much riyadh bank	Positive	App Store	0	0	0
App Store	dd9242be-7e29-4ef3-8871-2c0f49f30f23	ابو غيب	3/12/22 20:53	نتمنى منكم الدخول السريع				en	sa	riyad-bank	We hope you will enter quickly.	ar	hope enter quickly	Positive	App Store	1	0	0
App Store	86cae385-7c0b-4321-b776-6a8fa82b05ea	hadieez	3/12/22 20:43	نجم				en	sa	riyad-bank	Active, organized, and simple	ar	active organize simple	Neutral	App Store	1	0	0
App Store	d611a421-22b7-4ad2-aa70-4d7ecc4ad03e	ع م ه	3/12/22 19:36	بطء في التطبيق				en	sa	riyad-bank	The application opens with difficulty on the day of receiving the salary. I kindly request you to work on resolving this issue. Thank you very much.	ar	application open difficulty day receive salary kindly request work resolve issue thank much	Negative	App Store	1	1	0
App Store	475b42db-c9e4-4f85-a4f4-9fd1970cafb8	المصنعي	3/12/22 18:47	ممتاز				en	sa	riyad-bank	Excellent and easy to use.	ar	excellent easy use	Positive	App Store	0	0	0
App Store	5ac332ed-0f86-4d69-9d6a-3dfc6cf21de5	alsubaie10	3/12/22 19:04	سداد				en	sa	riyad-bank	Complicated in bill payment, where you cannot settle a partial amount, you are required to pay the full amount.	ar	complicate bill payment settle partial amount require pay full amount	Negative	App Store	1	1	0
App Store	c7f8c62d-82b7-46eb-a564-b038482bd754	رعد ٢٠٠٥	3/12/22 18:34	تطبيق الرياض ممتاز وسهل الاستعمال				en	sa	riyad-bank	Deserves five stars.	ar	deserve five star	Positive	App Store	0	0	0
App Store	764cf6a8-0221-42ca-b812-56c3cef59888	ابوجلال الدين	3/12/22 17:25	تطبيق				en	sa	riyad-bank	Easy and wonderful application	ar	easy wonderful application	Positive	App Store	0	0	0
App Store	0b4b3a05-bd7b-41af-bd30-2d5357727dd9	Mab43543	3/12/22 17:11	تطبيق مميز				en	sa	riyad-bank	An application that keeps up with changes and developments... Ease of conducting banking operations and contains all the requirements that the customer needs.	ar	application keep change developments ease conduct bank operations contain requirements customer need	Positive	App Store	1	0	0
App Store	66227e3a-3779-44dc-9cc4-c91f8d4d3e5b	نهوانمر	3/12/22 16:24	الشمري نداء				en	sa	riyad-bank	Make life and its requirements easy. Thank you.	ar	make life requirements easy thank	Positive	App Store	0	0	0
App Store	01a9ad95-8c5f-43c6-8ec0-7a2de88441d1	جى أر66	3/12/22 15:43	جدة حى النسيم				en	sa	riyad-bank	Masha Allah, excellent and fast.	ar	masha allah excellent fast	Positive	App Store	0	0	0
App Store	e56a4876-616e-477a-a7bf-71e67a47c4f4	مسترمندوب	3/12/22 14:51	راااائع جدآ إلا في إضافة مستفيد جديد هذي عندكم معقده شوي				en	sa	riyad-bank	But he remains a hero.	ar	remain hero	Positive	App Store	0	0	0
App Store	95e5f780-b1f5-449a-bf87-4499cc9482f2	Vampier008	3/12/22 14:13	تطبيق سهل و مريح				en	sa	riyad-bank	Easy and convenient application.	ar	easy convenient application	Positive	App Store	0	0	0
App Store	8d66c51e-9ef7-4873-ba5b-e5f21167de33	Sami09.	3/12/22 12:56	سهل وسريع				en	sa	riyad-bank	Easy to use and fast at the same time, and it has all the services we need.	ar	easy use fast time service need	Positive	App Store	0	0	0
App Store	239a0c1c-f99f-4b5f-8876-be6368304f7f	alabesw	3/12/22 10:17	الافضل				en	sa	riyad-bank	10 years with the application. The best.	ar	years application best	Positive	App Store	0	0	0
App Store	42efb734-be77-434d-8602-59d2bb5e6a00	So2100	3/12/22 12:38	ابها				en	sa	riyad-bank	The application needs more improvement compared to the Al Rajhi Bank application.	ar	application need improvement compare al rajhi bank application	Neutral	App Store	1	0	0
App Store	61d497da-1f7f-48e0-a683-6e0097232b22	ابو عبدالمجيذ العتيبي	3/12/22 12:19	الرياض				en	sa	riyad-bank	Why isn't there a quick login to the application like all other banks? The password is long and difficult, you are exhausted us.	ar	isnt quick login application like bank password long difficult exhaust us	Negative	App Store	1	0	0
App Store	b8b1c936-e677-404f-bfb9-81d54b6fd89e	حائليه	3/12/22 8:39	ام براءه				en	sa	riyad-bank	Very beautiful.	ar	beautiful	Positive	App Store	0	0	0
App Store	5e6a4b7c-f656-4b60-9679-c06d517344a0	نونا مكة	3/12/22 7:45	تميز بلا حدوود				en	sa	riyad-bank	Wonderful application.	ar	wonderful application	Positive	App Store	0	0	0
App Store	6753bf11-bf48-4477-86b2-b18f372a571f	ابو فيصصل	3/12/22 5:33	خدمات				en	sa	riyad-bank	The services are excellent and more than wonderful, they eliminate the need to go to the bank.	ar	service excellent wonderful eliminate need go bank	Positive	App Store	1	0	0
App Store	0eb0a96a-abdd-43d2-a04b-4bbd5a2ac328	hosam malkawi	3/12/22 3:12	رائع				en	sa	riyad-bank	Wonderful, I really really really like it.	ar	wonderful really really really like	Positive	App Store	0	0	0
App Store	8bb33565-23b5-4a6c-a5f3-8c799bc7546b	الاستاد بندر	3/11/22 22:27	سهوله الاستخدام				en	sa	riyad-bank	Smooth and distinctive	ar	smooth distinctive	Positive	App Store	0	0	0
App Store	c43486c7-28c3-43dc-a95c-431d6cfe4de1	ابو محمد helal	3/12/22 0:15	ملاحظات :				en	sa	riyad-bank	My notes: 1. There is no direct investment in gold through the application, whether buying or selling. 2. There is no subscription for stocks. 3. There are no direct real estate investment offers. 4. There is no link to trade local and international stocks directly. 5. There is no direct trading in currencies. 6. There are no directly linked online stores for buying and selling on the website.	ar	note direct investment gold application whether buy sell subscription stock direct real estate investment offer link trade local international stock directly direct trade currencies directly link online store buy sell website	Negative	App Store	0	1	0
App Store	4761adbe-3fbb-4db3-a26e-2955d4d50249	Kholoud43112	3/11/22 18:09	مرتب وسهل الوصول للخدمات				en	sa	riyad-bank	Some of the banking applications that I have dealt with.	ar	bank applications deal	Neutral	App Store	1	1	0
App Store	50669c00-1726-4ee1-8b65-3f8c527a540d	محمد البيك	3/11/22 18:43	صعوبة التعامل مع التطبيق				en	sa	riyad-bank	The difficulty lies in: 1- When adding a beneficiary. 2- When registering a new invoice and why you don't have the option like other banks to retrieve invoice information from the previous bank.	ar	difficulty lie add beneficiary register new invoice dont option like bank retrieve invoice information previous bank	Negative	App Store	0	1	0
App Store	9949947e-7240-4668-a989-2d5d99a8d126	ffk202020	3/11/22 17:05	Thank you so much				en	sa	riyad-bank	Thank you for the efforts made to improve the program. Thank you deeply.	ar	thank efforts make improve program thank deeply	Positive	App Store	0	0	0
App Store	1028a37a-f6be-46d6-959d-4a39ac5ce188	ابو الطور	3/11/22 14:47	المملكه العربيه السعوديه				en	sa	riyad-bank	To Al Imam Bank of Riyadh, may Allah bless and protect you.	ar	al imam bank riyadh may allah bless protect	Positive	App Store	1	0	0
App Store	4d16d81f-5e07-4c14-ac4c-a7684c04cc51	souf souf	3/11/22 13:49	احصائية الحوالات لمستفيد معين				en	sa	riyad-bank	I wish to facilitate the process of obtaining the transaction statistics for a specific beneficiary easily. This can be done by selecting the beneficiary's name, then I can know the financial activity between me and them. Thank you.	ar	wish facilitate process obtain transaction statistics specific beneficiary easily do select beneficiarys name know financial activity thank	Positive	App Store	1	0	0
App Store	20ce72e6-82f3-45d1-8bb2-1e904e0555cf	انتساب	3/11/22 13:01	ممتاز				en	sa	riyad-bank	Excellent, but I encountered a problem with account detection which forced me to visit the branch to resolve it.	ar	excellent encounter problem account detection force visit branch resolve	Negative	App Store	0	0	0
App Store	484685cb-15ab-4eeb-aff6-4bf6a4e09dac	نورة بخيت	3/11/22 10:19	تطبيق الحوالات				en	sa	riyad-bank	Enabling transfer from current to investment account and vice versa through mobile application. Thank you.	ar	enable transfer current investment account vice versa mobile application thank	Positive	App Store	0	1	0
App Store	40b43b4e-85be-4113-a47c-b97502626339	ابووهويشششل	3/11/22 10:11	بنكي المفضل				en	sa	riyad-bank	May Allah bless my beloved companion with eternal love.	ar	may allah bless beloved companion eternal love	Positive	App Store	1	0	0
App Store	1e21a48b-41c0-422a-a734-8b494ad3ac59	ابو جوري القثامي	3/11/22 10:18	تطبيق الرياض				en	sa	riyad-bank	I hope to see it developed better to compete with Al Rajhi application in terms of user-friendliness.	ar	hope see develop good compete al rajhi application term userfriendliness	Positive	App Store	1	0	0
App Store	8152e4de-a38a-4430-879e-f4b0c7ebc96a	3amorrrrry	3/11/22 7:43	ملاحظة				en	sa	riyad-bank	Face recognition and fast login have some remaining issues, but everything else is excellent.	ar	face recognition fast login remain issue everything else excellent	Positive	App Store	0	1	0
App Store	c7af6b5c-0d72-4fa2-b3d6-6f83245c833b	وليد المرحوم بوعبدالرحمن	3/11/22 9:31	الاحساء الهفوف				en	sa	riyad-bank	One of the best banks for security, and the application is unbeatable, more than excellent. Keep up the good work.	ar	one best bank security application unbeatable excellent keep good work	Positive	App Store	0	0	0
App Store	5dca946e-68a0-422c-a22a-86e6b3d1f622	Motiam	3/11/22 7:09	من افضل تطبيقات البنوك				en	sa	riyad-bank	Easy and clear, and the services are diverse. Continuous development is evident and a sophisticated team stands behind this.	ar	easy clear service diverse continuous development evident sophisticate team stand behind	Positive	App Store	0	0	0
App Store	a6d9b6f0-1ac1-4eaa-9f9b-001efe0869e5	Khmh1980	3/11/22 7:11	لدي تحويل من STCPAY لحسابي البنكي				en	sa	riyad-bank	The amount of 100 Riyals has been transferred from STCPAY to my bank account and has not arrived yet by Thursday after 12 am. Will the transfer be made next Sunday?	ar	amount riyals transfer stcpay bank account arrive yet thursday transfer make next sunday	Neutral	App Store	0	1	0
App Store	4bceb353-a983-43d7-9976-67ea8c757be7	1315564	3/11/22 4:56	الحوالات السريعة				en	sa	riyad-bank	Excellent service	ar	excellent service	Positive	App Store	0	0	0
App Store	fd89e794-061b-4fc6-9f33-e773b999fef6	naifsalman	3/11/22 5:39	بصمة الوجه				en	sa	riyad-bank	Repeated problems with facial recognition.	ar	repeat problems facial recognition	Negative	App Store	0	1	0
App Store	15494d95-06e5-44bb-8cb4-5ad975034aa1	Sarah1361	3/11/22 5:26	ساره				en	sa	riyad-bank	The application is great and easy to use, but after the latest update, there is a problem with activating the fingerprint. The application cancels it instead of activating it.	ar	application great easy use late update problem activate fingerprint application cancel instead activate	Negative	App Store	0	1	0
App Store	a79a00e3-0781-4c14-a908-13e10e448e21	ماجد ٥٠٥	3/11/22 3:45	رياض اون لاين				en	sa	riyad-bank	Excellent application. The developers are thanked for this beautiful application.	ar	excellent application developers thank beautiful application	Positive	App Store	0	0	0
App Store	db2565f0-84e1-4f13-91d2-6a014405bd1d	ssaadd.1437	3/11/22 3:16	تطبيق الرياض				en	sa	riyad-bank	Easy to use Just need to place self-service ATMs In the city of Al-Ahsa, Al-Ayoun.	ar	easy use need place selfservice atms city alahsa alayoun	Neutral	App Store	0	0	0
App Store	6eba9cd8-34c4-4d68-915d-d9be99454a31	موقع ممتاز وثقه	3/10/22 23:23	الائتمانية				en	sa	riyad-bank	Easy to use and all the needs are available.	ar	easy use need available	Positive	App Store	0	0	0
App Store	b74287cf-a7ff-464e-bc97-612fb18238e4	مطعم الرمانسية	3/10/22 22:19	بنك مشاءالله تبارك رائد دومن				en	sa	riyad-bank	Masha Allah, Tabarak, Ra'id Du'man is an excellent bank.	ar	masha allah tabarak raid duman excellent bank	Positive	App Store	1	0	0
App Store	826b917f-9c9f-413f-ac05-6aade3650d98	waelAlanizi	3/10/22 21:52	بنك ممتاز ولكن الصيانة الدورية كل اسبوع تحتاج الى اعادة جدوله				en	sa	riyad-bank	But regular weekly maintenance requires a reboot.	ar	regular weekly maintenance require reboot	Neutral	App Store	1	0	0
App Store	9089c37b-84cf-47e8-8eb6-39eb0ad0bcaa	ومتتتابع	3/10/22 20:32	البصمه التطبيق فاشله				en	sa	riyad-bank	The fingerprint is the worst	ar	fingerprint bad	Negative	App Store	1	1	0
App Store	66bae003-72ff-4362-8122-fefe54429703	هــنو	3/10/22 18:56	بنك الرياض				en	sa	riyad-bank	"The only bank that I like and enjoy dealing with."	ar	bank like enjoy deal	Positive	App Store	0	0	0
App Store	9799f3b1-a2e0-49cb-a94a-7c3fe9d28c3d	ابو إحسان	3/10/22 17:55	ممتاز				en	sa	riyad-bank	We wish for continuous development.	ar	wish continuous development	Positive	App Store	1	0	0
App Store	1af42814-f825-42d5-ba2f-d1d2e009027f	الً ممن	3/10/22 18:35	السهوله				en	sa	riyad-bank	Please make it easy to add the beneficiary, like you do.	ar	please make easy add beneficiary like	Neutral	App Store	1	0	0
App Store	db4b6a60-37d2-45e5-8ce9-2affdd1fe063	احمد حاسر كعبي عميل بنك الرياض	3/10/22 17:03	الرياض				en	sa	riyad-bank	Riyad Bank is excellent.	ar	riyad bank excellent	Positive	App Store	0	0	0
App Store	f438d415-e563-4e40-8a32-4333366a0368	مها ام الابطال	3/10/22 16:37	مها				en	sa	riyad-bank	Very comfortable.	ar	comfortable	Positive	App Store	0	0	0
App Store	31bb55c0-fbba-40eb-862f-90111561802d	Ziyad2012	3/10/22 17:02	كما ذكر الاخوان اضافة الى تسهيل التحويل حيث من الصعوبة التحويل الى شخص لم يوضح كيفية عمل العناوين	{'id': 18272924, 'body': 'عميلنا العزيز، بعد إجراء الحوالة يمكنك مشاركة تفاصيل الحوالة من خلال النقر على خيار: شارك. و فيما يخص السداد نأمل منك تزويدنا بملاحظاتك من خلال البريد الإلكتروني \r\ninfo@riyadbank.com \r\n لنتمكن من خدمتك بشكل أفضل\n\n', 'modified': '2020-10-05T09:23:20Z'}			en	sa	riyad-bank	Needs development, facilitation, and additions. For example, I want to print a transfer receipt. I want to make payment. It is difficult for me to find what I want easily, as in other banks.	ar	need development facilitation additions example want print transfer receipt want make payment difficult find want easily bank	Neutral	App Store	1	1	0
App Store	6ba21173-bc3a-41c5-9f11-85042689f9c0	aparjani	3/10/22 16:16	تطبيق بنك الرياض				en	sa	riyad-bank	Services of exceptional excellence	ar	service exceptional excellence	Positive	App Store	0	0	0
App Store	461bdf24-5583-4ffa-8b1a-637a7d723db1	عبدالكريم ١١	3/10/22 15:08	الجوف				en	sa	riyad-bank	An excellent application that serves you everywhere.	ar	excellent application serve everywhere	Positive	App Store	0	0	0
App Store	f825182b-b5a2-450c-a5fa-bc1620023d82	saud 54	3/10/22 15:39	الظهران				en	sa	riyad-bank	Easy and the procedures are easy and clear.	ar	easy procedures easy clear	Positive	App Store	0	0	0
App Store	63c2a431-9160-4950-939f-c34606b8f130	IM GOBA	3/10/22 12:50	تطور في الخدمات المصرفية الالكترونية				en	sa	riyad-bank	Significant progress forward	ar	significant progress forward	Positive	App Store	0	0	0
App Store	4e48ec54-e40f-4612-a0d7-6bc92619cc5e	ابو عمر الراجحي	3/10/22 13:55	رسائل الحوالات				en	sa	riyad-bank	Operations messages do not come in most cases.	ar	operations message come case	Neutral	App Store	0	1	0
App Store	4ea3fe5a-24ab-474d-9392-559260944245	صباشا	3/10/22 12:22	النسبه مرتفعه				en	sa	riyad-bank	The personal and real estate loans rates are very high.	ar	personal real estate loan rat high	Negative	App Store	1	0	0
App Store	d77e5bfc-2f96-4d4e-bdc4-ddc9fc991c07	Sameer aaa	3/10/22 12:14	تطبيق رائع				en	sa	riyad-bank	The application is convenient and easy to use, and eliminates the need to visit the branch for all banking operations.	ar	application convenient easy use eliminate need visit branch bank operations	Positive	App Store	1	0	0
App Store	05d4ea09-bd21-4457-b775-8627619d07aa	قريتي نقبين	3/10/22 11:35	بنكي شعار بنك الرياض. وانا اقولها نعم انه بنكي				en	sa	riyad-bank	The slogan of Banque Riyadh is "My bank," and I say yes, it is my bank.	ar	slogan banque riyadh bank say yes bank	Neutral	App Store	1	0	0
App Store	95fe49f5-bb03-4cb0-bc26-47fbfe145ff0	Rizk ezz	3/10/22 11:33	رزق عز				en	sa	riyad-bank	A fantastic application	ar	fantastic application	Positive	App Store	0	0	0
App Store	d385f21b-cc2c-454a-b513-0c37541a3765	F.b33	3/10/22 11:25	اقتراح				en	sa	riyad-bank	A suggestion to have a quick login feature like the Rajhi and Al Ahli applications, with a five-digit or four-word password for accessing the application.	ar	suggestion quick login feature like rajhi al ahli applications fivedigit fourword password access application	Neutral	App Store	0	1	0
App Store	43033da8-bfac-41f5-867d-c4cfa8ba2fce	sam 4454	3/10/22 10:50	راائع				en	sa	riyad-bank	Very wonderful and comprehensive ðð¼ðð¼ The best banking app I have.	ar	wonderful comprehensive best bank app	Positive	App Store	0	0	0
App Store	e5c2ae11-a3a0-488f-81f1-86c024ad9133	Nooouraaa	3/10/22 9:34	ممتاز				en	sa	riyad-bank	Good, clear, and fast.	ar	good clear fast	Positive	App Store	0	0	0
App Store	0a34bdff-b720-4777-b624-8dc9227956c6	ناهض عوض المطيري	3/10/22 10:24	تعديل				en	sa	riyad-bank	Peace be upon you, please modify the application as it has some delays and notifications within the application that are not working properly and appropriately. There is also a comment and the quick login is not working.	ar	peace upon please modify application delay notifications within application work properly appropriately also comment quick login work	Negative	App Store	0	0	1
App Store	b7c82225-63f7-4400-90fa-b381ada5ebb9	فرحان السياري	3/10/22 8:34	بنك الرياض				en	sa	riyad-bank	Riyadh Bank is considered the best bank in terms of simple options, and to be honest, I can't do without it because they don't have comments like other banks.	ar	riyadh bank consider best bank term simple options honest cant without dont comment like bank	Positive	App Store	1	0	0
App Store	6a5afc0f-0ea4-4ad7-a626-4e495c335462	ellneno199	3/10/22 9:05	بصمة الوجة				en	sa	riyad-bank	Difficulty in using face ID and with every update, it gets deleted.	ar	difficulty use face id every update get delete	Negative	App Store	0	0	0
App Store	7ef01c08-858c-4268-add6-c4f984b0a692	كاريب	3/10/22 8:32	👍				en	sa	riyad-bank	Beautiful and easy application.	ar	beautiful easy application	Positive	App Store	0	0	0
App Store	d5a20172-bce9-4d09-a06c-f8db402e8d7c	منال حميد الشراري	3/10/22 6:13	نواف الشراري				en	sa	riyad-bank	excellent bank	fa	excellent bank	Positive	App Store	0	0	0
App Store	4b8ebc87-1a1e-4e55-b05a-e2c892b04271	قرطبة	3/10/22 7:07	الرياض الرياض				en	sa	riyad-bank	You have a problem with logging in. You enter the password quickly and accurately once, and you don't need to log in again.	ar	problem log enter password quickly accurately dont need log	Neutral	App Store	0	1	0
App Store	7fabad22-3645-4ff4-b7be-cbd6267a4ae9	Zaki2	3/10/22 5:35	ZAKI				en	sa	riyad-bank	It needs improvement in account data, transaction history and its value. Also, the credit card account needs to be developed to accurately track transactions and their dates, along with adding the invoice issuance date and the transactions included in the invoice.	ar	need improvement account data transaction history value also credit card account need develop accurately track transactions date along add invoice issuance date transactions include invoice	Neutral	App Store	0	1	0
App Store	df5822f3-d762-4351-88bb-81c24d828b3f	Turki...	3/10/22 4:39	كويسين				en	sa	riyad-bank	It doesn't matter to them.	ar	doesnt matter	Neutral	App Store	1	1	0
App Store	18c862f8-c176-4c64-9262-3b30b036b6bf	تضرر	3/10/22 2:56	تطبيق الرياض				en	sa	riyad-bank	Outstanding and requires continuous development that keeps pace with technological advancements and the use of the best available tools to achieve that.	ar	outstanding require continuous development keep pace technological advancements use best available tool achieve	Positive	App Store	1	0	0
App Store	02fa0e84-6d9d-4252-878c-64670fc75825	الاميرالراحل	3/10/22 4:30	الأحساء				en	sa	riyad-bank	My apologies, but I'm unable to assist.	ar	apologies im unable assist	Negative	App Store	0	1	0
App Store	ae520299-2401-496a-b995-f21a38e943c9	eid.Al	3/10/22 3:10	ملاحظتي				en	sa	riyad-bank	I want to work on developing the Riyadh application. The process of transfer services is complicated, so it is necessary to work on making it easier to use. Thank you.	ar	want work develop riyadh application process transfer service complicate necessary work make easy use thank	Neutral	App Store	1	1	0
App Store	a45e6f92-6cfc-452b-86a4-00bd915bc20e	فهد م ح	3/10/22 0:57	افضل تطبيق بنكي ونتطلع الافضل منهم كما تعودنا				en	sa	riyad-bank	A powerful and easy-to-use application.	ar	powerful easytouse application	Positive	App Store	0	0	0
App Store	b5ff18a6-0735-4a9d-a760-31f237c0c2b4	gk0005	3/10/22 0:21	التميز				en	sa	riyad-bank	I believe that Bank Al-Riyadh is not the only one, but it is the only distinguished one.	ar	believe bank alriyadh one distinguish one	Neutral	App Store	1	0	0
App Store	09cab739-57d6-440c-9e08-9404560aa4fe	Daifallal	3/9/22 23:50	جميل جدا				en	sa	riyad-bank	Very sweet and fast in rotations and transactions.	ar	sweet fast rotations transactions	Positive	App Store	0	0	0
App Store	a41147d4-0d7c-422d-8bba-fe70cb7ed37a	فلسطين القدس العربي والاسلامي	3/9/22 22:59	شكرا كتير لبنك الرياض				en	sa	riyad-bank	Thank you very much.	ar	thank much	Positive	App Store	0	0	0
App Store	a06aa652-9694-489d-8ca8-e48bafd96b2b	pretty8maya	3/9/22 23:06	فيزا				en	sa	riyad-bank	Why do some places not accept Visa cards?	ar	place accept visa card	Negative	App Store	0	1	0
App Store	ce84733a-7fa7-456f-9c67-03cc5489f721	الو صِبا	3/9/22 22:33	تفعيل البصمه				en	sa	riyad-bank	Every time I do it, the fingerprint is canceled. It's a problem I've been suffering from for over 6 months until now.	ar	every time fingerprint cancel problem ive suffer months	Negative	App Store	0	1	0
App Store	5816ebf4-86cb-4588-859f-7d67f150254a	sharariahmd	3/9/22 21:44	برنامج ممتاز وفعال				en	sa	riyad-bank	Easy application that provides most services.	ar	easy application provide service	Positive	App Store	0	0	0
App Store	e49aec84-1a94-4069-ab78-fc2d0c518eb5	ميدو١١٢٢	3/9/22 21:32	مشكلة				en	sa	riyad-bank	There is a problem with the fingerprint; every time I want to enter, it asks me to activate it.	ar	problem fingerprint every time want enter ask activate	Negative	App Store	0	1	0
App Store	5de3369d-e33c-4989-bd8b-818902c80189	hsviphs	3/9/22 21:00	القصيم _ بريدة				en	sa	riyad-bank	An easy-to-use application.	ar	easytouse application	Neutral	App Store	0	0	0
App Store	a56a4b66-fee8-4595-80f1-42b4cb62accd	Shumokh03	3/9/22 20:55	الرياض				en	sa	riyad-bank	The best bank and the best banking application is always Bank Al Riyadh.	ar	best bank best bank application always bank al riyadh	Positive	App Store	0	0	0
App Store	ffebae81-61f2-4edd-8f19-1b6b102423a3	mos bot	3/9/22 20:20	خدمة				en	sa	riyad-bank	Special car offer for you	ar	special car offer	Neutral	App Store	0	1	0
App Store	69d597a9-9387-4856-a977-c9d083c5d6ed	أبوعبدالعزيز 1234	3/9/22 19:35	اضافة تحديث الهوية ،،والتحويل من البطاقة الائتمانيه للحساب الجاري والعكس كذلك				en	sa	riyad-bank	Add the identity update feature to the application, and also enable the transfer from the credit card to the current account and vice versa. Also, it would be great to add an icon that opens the investment wallet, and to add the relationship manager's information for private and diamond banking.	ar	add identity update feature application also enable transfer credit card current account vice versa also would great add icon open investment wallet add relationship managers information private diamond bank	Positive	App Store	0	1	0
App Store	aa0da6e3-fbd8-4d08-b954-2410ba9613c7	@arebaiaan	3/9/22 19:05	التطبيق رائع وسهل الاستخدام				en	sa	riyad-bank	The application is easy and fast, and it has all the services. I recommend using it. ðð»	ar	application easy fast service recommend use	Positive	App Store	0	0	0
App Store	6e9ef339-9169-4fea-9c25-bcfbb25d484e	Rasoolaa	3/9/22 19:13	رائع				en	sa	riyad-bank	Very good.	ar	good	Positive	App Store	0	0	0
App Store	438085c2-b45c-4828-a663-d6496b473575	الحياة السليمة	3/9/22 18:06	تقييم				en	sa	riyad-bank	The Riyad Bank application saves you from visiting the branch in many cases, and it is also an easy, convenient, and highly secure application.	ar	riyad bank application save visit branch many case also easy convenient highly secure application	Positive	App Store	0	0	0
App Store	67f99fab-a137-42d3-a46c-cc957683b1d3	الحميدي ضيف الله محمد العنزي	3/9/22 17:45	منطقة الجوف محافظة القريات				en	sa	riyad-bank	I hope for everyone's support and wish, just as everyone wishes, to win the lottery for the Riyadh prize, which is doubling the salary for one year. I know that Allah is the Provider, so I put my trust in Him, and He is the Best Guardian.	ar	hope everyones support wish everyone wish win lottery riyadh prize double salary one year know allah provider put trust best guardian	Positive	App Store	0	0	0
App Store	f5db278e-419a-495e-98a8-e20b08d979d6	abowaad66	3/9/22 17:52	تحويل				en	sa	riyad-bank	Bad. If there is repeated conversion or more of the same amount, it will be rejected. Either I increase the amount or decrease it so that the transfer is accepted.	ar	bad repeat conversion amount reject either increase amount decrease transfer accept	Negative	App Store	1	1	1
App Store	091ac1e3-804b-49e2-8475-0f1e24323f6c	بن عرجون	3/9/22 17:13	الشرقية - القطيف				en	sa	riyad-bank	One of the best services and fast to use. Thank you very much and may Allah bless you.	ar	one best service fast use thank much may allah bless	Positive	App Store	0	0	0
App Store	1304ea07-4e03-4ca0-9399-0e4b7f02cf08	Ammar0430	3/9/22 17:31	بصمة الوجه				en	sa	riyad-bank	I work and do it every day, and I boil it and do it again. Please solve the fingerprint problem in the program.	ar	work every day boil please solve fingerprint problem program	Neutral	App Store	0	1	0
App Store	a01229cc-e680-43d8-9e46-9c08994e704d	ابو فنطله	3/9/22 17:25	مشكله تقنيه				en	sa	riyad-bank	It is not easy to add a beneficiary. When clicking on the add beneficiary command, there is no data when making a transfer.	ar	easy add beneficiary click add beneficiary command data make transfer	Negative	App Store	0	1	0
App Store	ec21a516-84f9-4192-8506-4ecbc9bcf28d	ًًً😠	3/9/22 16:37	_				en	sa	riyad-bank	More than wonderful.	ar	wonderful	Positive	App Store	0	0	0
App Store	edb6d1b4-7f91-40e3-acff-e9f0d916a38d	البجه	3/9/22 16:47	تداول الاسهم				en	sa	riyad-bank	We hope to add an option to be able to trade online, not just through ATMs.	ar	hope add option able trade online atms	Neutral	App Store	0	1	0
App Store	faae3806-cf89-4a3d-b67a-f062ed930c42	bmb739	3/9/22 16:06	bmb739				en	sa	riyad-bank	Congratulations on the easy and convenient service. Bank Al Riyadh's services are excellent, and thank you for the service.	ar	congratulations easy convenient service bank al riyadhs service excellent thank service	Positive	App Store	0	0	0
App Store	a6d34a37-9771-457d-a88e-abd77535ca1f	؟!!؟	3/9/22 16:13	تقييم				en	sa	riyad-bank	Every time the application is updated, we are surprised with worse results. Why? Are you a weak bank that cannot compete with other banks?! I hope for improvement in service and customer retention. Thank you.	ar	every time application update surprise bad result weak bank compete bank hope improvement service customer retention thank	Negative	App Store	1	0	0
App Store	d002ebc9-0d20-4682-a3cf-2f08b772b19b	Adel2323	3/9/22 15:59	ممتاز جدا				en	sa	riyad-bank	Excellent. It requires quick entry with a password, unless it already exists and I'm not aware of it. (Quick entry)	ar	excellent require quick entry password unless already exist im aware quick entry	Positive	App Store	1	0	0
App Store	7735d33c-f5c8-44e3-bfc4-042a19cb3f8b	mb_os2	3/9/22 15:29	تحسين التطبيق				en	sa	riyad-bank	It needs more improvement and user-friendliness. It is a bit complicated when it comes to the financial transfer process.	ar	need improvement userfriendliness bite complicate come financial transfer process	Negative	App Store	1	0	0
App Store	0743055a-0c36-4656-8ee5-7b7239770012	ابوعبداللطيف🤲	3/9/22 15:07	راضي كل الرضى				en	sa	riyad-bank	Excellent very very very	ar	excellent	Positive	App Store	0	0	0
App Store	5a351c1c-f354-492e-b0a3-808979502f6d	ggghjhhu km	3/9/22 14:39	تقييم				en	sa	riyad-bank	Excellent very very much.	ar	excellent much	Positive	App Store	0	0	0
App Store	7656e9d1-7a6c-4cfb-b829-82288b23d4bb	مزاعل اليزابيث	2/23/22 16:20	مقترح				en	sa	riyad-bank	Increase the fields for login information on the account or redesign the login interface.	ar	increase field login information account redesign login interface	Neutral	App Store	0	1	0
App Store	5c9b5ae4-b4da-40aa-a018-cdbc3f61f3a3	الحربي ،،،	3/9/22 13:22	الدخول السريع				en	sa	riyad-bank	I have activated quick login more than once, but it doesn't work.	ar	activate quick login doesnt work	Negative	App Store	0	1	0
App Store	52bbabb8-4d73-496b-afc1-c431e4213354	WAEL..LUXURY..	3/9/22 13:21	جميل ولكن!!				en	sa	riyad-bank	The application is nice but it needs to be smoother and faster.	ar	application nice need smooth fast	Positive	App Store	0	0	0
App Store	eaea5337-bb89-4e4d-8c51-d4de346aedcb	kang seira	1/13/22 11:41	———				en	sa	riyad-bank	I have been experiencing a lot of problems with this application recently. I am unable to make any transfers. Please fix it, for God's sake. ð	ar	experience lot problems application recently unable make transfer please fix gods sake	Negative	App Store	1	1	0
App Store	fa30ab6f-f11b-4b72-a18b-4ff4bdb30950	r8_rex	1/28/22 20:26	Guys…				en	sa	riyad-bank	If the app doesn't work, go to Riyadh online on Google and good luck. Everything is working fine ðð¼ð	ar	app doesnt work go riyadh online google good luck everything work fine	Neutral	App Store	0	1	0
App Store	c45645f8-2f29-49c2-a88c-4ed5ec501c8f	Ms.Amwaj	1/25/22 5:52	التحديث				en	sa	riyad-bank	Why can't we convert? Why are they replacing the city instead of converting? How long do we have to wait for you to fix this problem?	ar	cant convert replace city instead convert long wait fix problem	Negative	App Store	0	1	0
App Store	ac40297c-42f2-4479-93e2-977c7d21001a	auuiazi	1/15/22 9:31	سيء				en	sa	riyad-bank	Bad, it used to work but after the latest update it doesn't work anymore!	ar	bad use work late update doesnt work anymore	Negative	App Store	1	1	0
App Store	4e22f356-af6c-42f4-b40c-65952fe99361	شههدد	1/3/22 13:56	مكة				en	sa	riyad-bank	I have a university card, and no one can transfer me, but I can transfer. However, after the last update, I am unable to transfer and I don't know the reason or the solution. When I select the person's place to transfer to, there is no other option available.	ar	university card one transfer transfer however last update unable transfer dont know reason solution select persons place transfer option available	Negative	App Store	0	1	0
App Store	fe64342c-a2b8-4218-90de-8123dec29689	cznzkks	1/5/22 6:09	عطل فني				en	sa	riyad-bank	There is a malfunction in the latest update and I cannot make a transfer!	ar	malfunction late update make transfer	Negative	App Store	0	1	0
App Store	c12c5f18-24d5-4c8b-b507-a6464013b70d	كحيلان السليمي	1/2/22 12:39	تطبيق سىء جدا مايفتح				en	sa	riyad-bank	It is telling you that there is an error in the password and you cannot edit it.	ar	tell error password edit	Negative	App Store	0	1	0
App Store	bd6ef6f6-5e5b-4bc1-8eae-77da05dc533f	الشمالي العطوي	3/2/23 16:39	يا رجال حمله والله انه فنان 😉😂🤙🏻				en	sa	riyad-bank	Hey man, he's really a genius ððð¤ð».	und	hey man hes really genius	Positive	App Store	0	0	0
App Store	13a55d8a-1387-4101-946f-84dcf2d0d819	الصصاآرممء	4/1/23 2:16	تعقيد زايد ماله لزوم				en	sa	riyad-bank	100%1	und		Neutral	App Store	0	0	0
App Store	a557b91b-729e-415c-9625-f37da744a194	Abdukder	3/11/22 9:00	من افضل تطبيقات				en	sa	riyad-bank	Exquisite!	ar	exquisite	Positive	App Store	0	0	0
App Store	491a6b4d-85a2-4f29-8236-abc9067e3017	snap | Fhdiich	3/10/22 7:04	كشف حساب ، ماعرفت كيف اطلعه زي الراجحي				en	sa	riyad-bank	Account statement, I didn't know how to get it like Al Rajhi	und	account statement didnt know get like al rajhi	Neutral	App Store	1	1	0
App Store	6b3cbef8-dc65-4e99-b5d3-a5696f8c3b5b	حاتم احمد امين	3/14/22 8:02	Prefect application				en	sa	riyad-bank	Prefect application	en	prefect application	Positive	App Store	1	0	0
App Store	136d3096-1c1f-46be-927b-1eaeb5c8efc0	Pathamkulam	3/10/22 4:53	Sabir				en	sa	riyad-bank	Itâs user friendly.Easy to use	en	user friendlyeasy use	Positive	App Store	0	0	0
App Store	2cd2754d-3c27-41e9-9aca-c36d70725624	nice and very heplful	7/17/22 10:56	Horrible services	{'id': 30927794, 'body': 'Dear customer, we regret to hear that, kindly provide us your experience for better assistance, and please contact with us at 920002470 or info@riyadbank.com and we will be happy to serve you.', 'modified': '2022-07-17T07:14:49Z'}			en	us	riyad-bank	This app just prove how horrible the services form this bank! Not even simple transactions can be done without being glitchy or annoying. No direct support from the employees, and even when I asked for that no one responded. Only bots that give u a loop of options till u lose your mind. My Mastercard was frozen for no obvious reason during my travel and I can imagine how that froze my life. Tryin…	en	app prove horrible service form bank even simple transactions do without glitchy annoy direct support employees even ask one respond bots give u loop options till u lose mind mastercard freeze obvious reason travel imagine freeze life try call support team app website call response mistake account bank update developers response already send tons email u yet u didnt even bother reply apparently s…	Negative	App Store	1	1	1
App Store	b6a28811-4d39-4841-87a8-b1867810a170	3RedRum	3/1/23 6:06	Bad	{'id': 35377141, 'body': 'Dear customer, kindly provide us more about your experience for better assistance, and please contact with us at 8001242225 or info@riyadbank.com and we will be happy to serve you.\r\n', 'modified': '2023-03-14T10:40:36Z'}			en	us	riyad-bank	This app fixes one problem but builds more. Why do I need to turn on my location to access my money? Whoever thought of this needs to be fired. We, the customers, do not need to tell you where we are at to use our money. Also, the face unlock still hasnât been fixed. We are in 2023, these are simple things to resolve. I am sure the response will be a random bot who will say call âcall this nu…	en	app fix one problem build need turn location access money whoever think need fire customers need tell use money also face unlock still hasnt fix simple things resolve sure response random bot say call call number	Negative	App Store	0	1	0
App Store	0e3aab29-6d70-4ccd-9566-a85674987141	nicemas	3/22/22 21:45	Rating this application	{'id': 29817045, 'body': 'Glad to hear that.', 'modified': '2022-05-18T10:52:15Z'}			en	us	riyad-bank	I found this application is a very useful and a friendly tool to use.	en	find application useful friendly tool use	Positive	App Store	0	0	0
App Store	9a32deb7-bdce-43a5-99d3-c05eb15b3a2d	Nadeem Bakhsh	4/19/23 6:41	Fake ratings. Terrible ux. Design ok	{'id': 36122845, 'body': 'Dear customer, kindly contact with us at 8001242225 or info@riyadbank.com and we will be happy to serve you.\r\n', 'modified': '2023-04-24T00:46:10Z'}			en	us	riyad-bank	The banks cx is terrible. Theres sms, then phone calls, then face id then sms again, make up your mind! Just keep adding stupid things without checking the ux. Cant paste iqama numbers either, youre a bank, im using it to issue visas for my maids why cant i paste. Terrible over all experience	en	bank cx terrible theres sms phone call face id sms make mind keep add stupid things without check ux cant paste iqama number either youre bank im use issue visa maids cant paste terrible experience	Negative	App Store	1	1	0
App Store	2c365f69-0cee-4b4e-ae3c-4430fc149e16	Majed850	3/25/22 11:02	Easy to use and familiar	{'id': 29817041, 'body': 'Glad to hear that.', 'modified': '2022-05-18T10:52:06Z'}			en	us	riyad-bank	Easy to use and familiar	en	easy use familiar	Positive	App Store	0	0	0
App Store	487f8c10-2264-44c2-9dc7-2595e78cb4e1	Abu_Sager	3/9/22 21:10	Mr ALDOSSARY Abdullah	{'id': 29817339, 'body': 'We are glad to hear that.', 'modified': '2022-05-18T10:59:31Z'}			en	us	riyad-bank	Every things you need from banking you got it from the app. Good job	en	every things need bank get app good job	Positive	App Store	1	0	0
App Store	683195ce-da5a-4289-8d29-e229413545dd	soot5	3/22/22 4:55	Good job	{'id': 29817055, 'body': 'We are glad to hear that.', 'modified': '2022-05-18T10:52:35Z'}			en	us	riyad-bank	Thanks Ryadh Bank for all services in application	en	thank ryadh bank service application	Positive	App Store	0	0	0
App Store	9ecf5f04-9420-42f8-8718-a161a4ad3b43	Faisal 2016	3/11/22 17:42	I love it	{'id': 29817419, 'body': 'We are glad to hear that.', 'modified': '2022-05-18T11:03:19Z'}			en	us	riyad-bank	Perfect and easy to use	en	perfect easy use	Positive	App Store	0	0	0
App Store	51f15645-53a5-447a-b8a1-97ff2cd07416	حمداني	3/16/22 16:55	Thanks	{'id': 29817302, 'body': 'Glad to heat that.', 'modified': '2022-05-18T10:58:03Z'}			en	us	riyad-bank	Easy use!	en	easy use	Positive	App Store	0	0	0
App Store	2beaee8f-07b8-4e09-81ff-ea9abb35dbbe	sojfmand1	3/10/22 7:28	excellent app	{'id': 29817358, 'body': 'Glad to hear that.', 'modified': '2022-05-18T11:00:26Z'}			en	us	riyad-bank	easy access, friendly usage and reliable	en	easy access friendly usage reliable	Positive	App Store	0	0	0
App Store	404aea67-f3fe-4739-af4d-0716fd4a30e1	@Marzoogee	3/18/22 12:39	Face ID	{'id': 29817282, 'body': 'Dear customer\r, please contact with us through customer service number 920002470 to check for you.\n\n', 'modified': '2022-05-18T10:57:41Z'}			en	us	riyad-bank	After the 3rd update still have issue in Face ID	en	rd update still issue face id	Negative	App Store	0	1	0
App Store	b20f32dd-575d-4139-ba55-9c9cdf0ee683	RB mobile application logo	10/1/22 8:13	Riyad bank mobile application				en	us	riyad-bank	Application is good but the logo is missing the bank name abbreviation such as RB. All other banks application has the letters of their bank name	en	application good logo miss bank name abbreviation rb bank application letter bank name	Neutral	App Store	1	0	0
App Store	a3a69706-b56a-49db-bd36-7237d44d2009	Master fwaz	3/15/22 9:31	Thanks for every one.				en	us	riyad-bank	I always thank the Al Badia branch for its employees, who are exceptional. ððº	ar	always thank al badia branch employees exceptional	Positive	App Store	0	0	0
App Store	205f58ff-710e-4733-a8d9-978039263a21	asyilhy	11/4/22 22:17	Trash app				en	us	riyad-bank	Trash app	en	trash app	Negative	App Store	1	0	0
App Store	1f0b662a-ac85-4888-9575-9ee8881d78fb	fjb46664	9/14/23 22:30	لا يعمل	{'id': 38958876, 'body': 'عميلنا العزيز، يؤسفنا سماع ذلك ونأمل منك التواصل معنا على الرقم 8001242225 أو من خلال البريد الإلكتروني info@riyadbank.com و تزويدنا بملاحظاتك لنتمكن من خدمتك بشكل أفضل.', 'modified': '2023-09-17T08:54:34Z'}			en	us	riyad-bank	The application is not working for IOS 13 users.	ar	application work ios users	Negative	App Store	0	1	0
App Store	abb053e2-e65d-42c9-a786-1be6a7e5c764	محمد الجعفر	7/6/23 10:27	سيئ	{'id': 20138249, 'body': 'عميلنا العزيز، يؤسفنا سماع ذلك ونأمل منك التواصل معنا على الرقم 920002470 أو من خلال البريد الإلكتروني \r\ninfo@riyadbank.com \r\nو تزويدنا بملاحظاتك لنتمكن من خدمتك بشكل أفضل.\r\n', 'modified': '2021-01-03T11:47:53Z'}			en	us	riyad-bank	bad	ar	bad	Negative	App Store	1	0	0
App Store	d23e61bc-1106-443f-88ca-cf22840f848e	omabady	3/22/22 1:03	ممتاز	{'id': 29817238, 'body': 'يسعدنا سماع ذلك.', 'modified': '2022-05-18T10:56:23Z'}			en	us	riyad-bank	The application is very good and beautiful, I swear to God.	ar	application good beautiful swear god	Positive	App Store	1	0	0
App Store	c5b0920e-b878-4e5f-b8f4-394a2adce401	H.2.A	4/29/23 21:51	التحديث الاخير غبي جدا	{'id': 36388499, 'body': 'عميلنا العزيز، نأمل منك التواصل معنا على الرقم 8001242225 أو من خلال البريد الإلكتروني info@riyadbank.com و تزويدنا بملاحظاتك لنتمكن من خدمتك\r\n', 'modified': '2023-05-08T10:05:17Z'}			en	us	riyad-bank	What is the benefit of facial recognition if the SMS code is mandatory for accessing the application?! Please solve the problem of accessing the application using facial recognition without the need for an SMS code.	ar	benefit facial recognition sms code mandatory access application please solve problem access application use facial recognition without need sms code	Neutral	App Store	0	1	0
App Store	909f68e3-0403-4e5c-83d9-fbb89dbe5d65	badi aldoosri	3/26/23 13:10	تطبيق فاشل	{'id': 35849152, 'body': 'عميلنا العزيز، يؤسفنا سماع ذلك ونأمل منك التواصل معنا على الرقم 8001242225 أو من خلال البريد الإلكتروني info@riyadbank.com و تزويدنا بملاحظاتك لنتمكن من خدمتك بشكل أفضل.\r\n\r\n', 'modified': '2023-04-09T15:48:11Z'}			en	us	riyad-bank	What is the point of running the website if, when I enter through the web, it asks me to enter a website and there is a delay in taking necessary actions?	ar	point run website enter web ask enter website delay take necessary action	Negative	App Store	0	0	1
App Store	ad6e74fa-1b72-40ec-96cc-c4474998b1d4	Kingdisaster	2/26/23 15:16	سي👎🏻				en	us	riyad-bank	The website service makes the user feel insecure and consumes more battery power.	ar	website service make user feel insecure consume battery power	Negative	App Store	1	0	0
App Store	c5fd122b-d9ec-4f7f-ac03-0eb8529b5d6c	x3law	2/25/23 21:09	طلب الموقع 👎🏼👎🏼👎🏼				en	us	riyad-bank	Activating the website is mandatory, f*ck you all. I am currently deleting the application and canceling the card.	ar	activate website mandatory fck currently delete application cancel card	Negative	App Store	0	1	0
App Store	deb8469b-8236-4333-8f0c-8daf5837806e	ابو مشعل العوني	11/4/22 16:16	من اسوا البنوك بالخدمه ومن اسوا البرامج بالخدمه				en	us	riyad-bank	One of the worst banks in terms of service, and the worst software programs in terms of service. They always require updates and are constantly cursed.	ar	one bad bank term service bad software program term service always require update constantly curse	Negative	App Store	1	0	0
App Store	9b482953-4d74-41bc-84aa-1daea7420c50	الدواسر تاج راسك	10/16/22 18:27	تطبيق قديم	{'id': 33385955, 'body': 'عميلنا العزيز، يؤسفنا سماع ذلك ونأمل منك مشاركتنا ملاحظتك من خلال التواصل على الرقم 8001242225 أو عبر البريد الالكتروني info@riyadbank.com و سيتم النظر في الملاحظة بعين الاعتبار', 'modified': '2022-11-27T11:25:44Z'}			en	us	riyad-bank	An old application that hangs.	ar	old application hang	Negative	App Store	1	0	1
App Store	cf535b05-619b-4aa0-9062-9c2328fa6183	ضيفوني x5_.y5	7/6/22 21:24	ثقييييل	{'id': 30927798, 'body': 'عميلنا العزيز، يؤسفنا سماع ذلك ونأمل منك مشاركتنا ملاحظتك عبر البريد الالكتروني info@riyadbank.com و سيتم النظر في الملاحظة بعين الاعتبار.', 'modified': '2022-07-17T07:15:45Z'}			en	us	riyad-bank	The application is very heavy and hangs a lot.	ar	application heavy hang lot	Negative	App Store	0	0	1
App Store	4eb8b6f4-dbf1-472a-8508-128e9c14ae38	Fahad4421	6/24/22 9:53	مية اجراء	{'id': 30927800, 'body': 'عميلنا العزيز، يؤسفنا سماع ذلك ونأمل منك مشاركتنا ملاحظتك عبر البريد الالكتروني info@riyadbank.com و سيتم النظر في الملاحظة بعين الاعتبار.', 'modified': '2022-07-17T07:15:51Z'}			en	us	riyad-bank	The bank is complicated and stupid, the procedures there are a hundred steps, like activating a personal account or activating fingerprint (entering the banking phone number, then personal information, then account, etc.), and if you make a mistake, it starts all over again. I am with Al Rajhi Bank and everything is done with just one click there, but we got stuck because of the loan.	ar	bank complicate stupid procedures hundred step like activate personal account activate fingerprint enter bank phone number personal information account etc make mistake start al rajhi bank everything do one click get stick loan	Negative	App Store	1	1	0
App Store	32f4cb2e-c3c8-43c7-a751-1453d263bfd9	mem5111	6/15/22 0:05	سيء ويعلق دايماً	{'id': 30927802, 'body': 'عميلنا العزيز، يؤسفنا سماع ذلك ونأمل منك مشاركتنا ملاحظتك عبر البريد الالكتروني info@riyadbank.com و سيتم النظر في الملاحظة بعين الاعتبار.', 'modified': '2022-07-17T07:16:00Z'}			en	us	riyad-bank	The worst application, it frequently crashes.	ar	bad application frequently crash	Negative	App Store	1	1	0
App Store	6b731e4c-d043-4e43-a25b-48a9a84954f9	Alice••	5/27/22 12:01	حتى بعد التحديث البرنامج يرفع الضغط!	{'id': 30209730, 'body': 'عميلنا العزيز، نأمل منك التواصل معنا على الرقم 920002470 لنتمكن من خدمتك.\r\n', 'modified': '2022-06-07T08:01:39Z'}			en	us	riyad-bank	It was fine, but sometimes it acts foolishly and cancels the fingerprint and quick login, and I have to reactivate them every two days. Even after updating, the same problem persists! The application is very useful and responsive, but it lacks the feature of card charging that is available when you open an account with Riyad Bank Online. And account management, it doesn't show details about withd…	ar	fine sometimes act foolishly cancel fingerprint quick login reactivate every two days even update problem persist application useful responsive lack feature card charge available open account riyad bank online account management doesnt show detail withdrawals adjust application overall application great hope improve future	Negative	App Store	1	1	1
App Store	899b65c3-7f81-49a9-a2b7-e717e5f099af	Mansourlolo	3/20/22 0:53	منصور الص	{'id': 29817259, 'body': 'يسعدنا سماع ذلك.', 'modified': '2022-05-18T10:56:50Z'}			en	us	riyad-bank	An easy-to-use application for overall application management. Thank you, Banque Banque Riyadh.	ar	easytouse application overall application management thank banque banque riyadh	Positive	App Store	0	0	0
App Store	f762da8f-8124-48c5-82f8-d88cafa0232c	1allo11	3/21/22 9:37	بشان الاكتتابات الجديدة				en	us	riyad-bank	Many new subscriptions do not appear in the Bank Al Riyadh application.	ar	many new subscriptions appear bank al riyadh application	Neutral	App Store	0	1	0
App Store	6e47523e-71a8-44e6-8350-6718308d00b3	turki9909	3/19/22 2:30	الخرج	{'id': 29817267, 'body': 'يسعدنا سماع ذلك.\r\n', 'modified': '2022-05-18T10:57:02Z'}			en	us	riyad-bank	I enjoyed the services of Al-Riyadh Bank in terms of ease and speed of execution. I am grateful to those in charge of this bank and I hope for its continuous prosperity.	ar	enjoy service alriyadh bank term ease speed execution grateful charge bank hope continuous prosperity	Positive	App Store	0	0	0
App Store	2fab6f99-c96d-4ddd-a1e6-e5734e7aee64	ابو سلطان الجليدي	3/16/22 16:42	تكبير. الحروف	{'id': 29817396, 'body': 'عميلنا العزيز، نأمل منك التواصل معنا على الرقم 920002470 أو من خلال البريد الإلكتروني info@riyadbank.com لنتمكن من خدمتك.\r\n', 'modified': '2022-05-18T11:02:16Z'}			en	us	riyad-bank	We hope that the organizers of the application take into consideration those with visual impairments and provide a feature for enlarging the text within the application.	ar	hope organizers application take consideration visual impairments provide feature enlarge text within application	Neutral	App Store	1	0	0
App Store	599ab2b6-e8fe-46c8-bcf1-2728e4b022ad	Abo nairf	3/16/22 1:24	حائل ٠٥٠٣٩٩٣٧٨٥				en	us	riyad-bank	Thank you, Bank Al Riyadh.	ar	thank bank al riyadh	Positive	App Store	0	0	0
App Store	5a3bad6e-37e7-40b0-b510-1985db40a8b6	ابو السنافر الطيبيين	3/15/22 11:38	Excellent				en	us	riyad-bank	A distinctive application that saves you from many bank visits. But it would be great if they give gifts ð	ar	distinctive application save many bank visit would great give gift	Positive	App Store	1	0	0
App Store	86d90795-36c2-4b3f-82f8-a06f22c9aee4	أبو آلوليد	3/15/22 6:05	ممتاز جداًالله يسعدكم	{'id': 29817411, 'body': 'نسعد بسماع ذلك.', 'modified': '2022-05-18T11:02:38Z'}			en	us	riyad-bank	If there were more than 5 stars, I would give it.	ar	star would give	Positive	App Store	1	0	0
App Store	9553c37a-71de-4d1f-a634-c32e770a6114	Waleed6023	3/13/22 18:16	تطبيق بنك الرياض				en	us	riyad-bank	The application is excellent and wonderful, thank you Riyadh Bank.	ar	application excellent wonderful thank riyadh bank	Positive	App Store	0	0	0
App Store	69157fe8-2093-42b0-bbd7-3ba4c08c62b0	Hghhghghh	3/13/22 7:53	بنك متطور				en	us	riyad-bank	Few breakdowns, variety of services ðð»	ar	breakdowns variety service	Neutral	App Store	0	1	0
App Store	13e0f3ab-fdd7-4a3e-b9ec-6008078b6edb	Tariq900	3/12/22 14:45	TARIQ	{'id': 29817578, 'body': 'نسعد بسماع ذلك.\r\n', 'modified': '2022-05-18T11:11:44Z'}			en	us	riyad-bank	The best banking application among all banks. It saves you a lot of hassle. You don't need to go to the bank and ask about anything. Using the application is easy and quick in response.	ar	best bank application among bank save lot hassle dont need go bank ask anything use application easy quick response	Positive	App Store	0	0	0
App Store	878c2599-d18f-4605-88fe-85c224376261	ص ع ه	3/13/22 7:31	الرياض حي الريان				en	us	riyad-bank	He lacks the display of investment balance like other banks.	ar	lack display investment balance like bank	Negative	App Store	1	0	0
App Store	cb89943d-a467-40ca-9ce8-d9e37c52d60f	zainab4994	3/11/22 12:29	تطبيق جميل	{'id': 29817426, 'body': 'نسعد بسماع ذلك', 'modified': '2022-05-18T11:03:44Z'}			en	us	riyad-bank	Beautiful facade and easy access, and availability of privacy.	ar	beautiful facade easy access availability privacy	Positive	App Store	0	0	0
App Store	53649c32-af2c-45b2-9bb1-b3aa02b1ba0b	DreamSamar9	3/12/22 10:50	لا استطيع الدخول للمحفظه الاستثماريه				en	us	riyad-bank	I find it frustrating that the application doesn't allow me to access my investment portfolio and see the changes in it.	ar	find frustrate application doesnt allow access investment portfolio see change	Negative	App Store	1	1	0
App Store	3d953681-2683-4673-93d3-22ec633d66bd	kan-zman	3/11/22 10:11	تطبيق رائع				en	us	riyad-bank	The application lacks only the reissuance of the ATM card.	ar	application lack reissuance atm card	Neutral	App Store	0	1	0
App Store	5e43c793-4888-4629-a48b-a9a489a59452	t alem	3/11/22 8:09	جدة				en	us	riyad-bank	New user currently and initially the situation is good and I hope the services provided are excellent, easy, and fast.	ar	new user currently initially situation good hope service provide excellent easy fast	Positive	App Store	1	1	0
App Store	593f9166-bd99-46e6-bfa3-99bd5d5ec741	دينا زواوي	3/11/22 1:18	Dina	{'id': 29817379, 'body': 'نسعد بسماع ذلك.\r\n', 'modified': '2022-05-18T11:01:39Z'}			en	us	riyad-bank	More than wonderful, this program is beautiful, easy, and fast in serving the customer.	ar	wonderful program beautiful easy fast serve customer	Positive	App Store	0	0	0
App Store	37a5aa58-4907-406f-828a-dfdf2923ce5c	¦» ǻ7றǻđ	3/11/22 0:33	ممتاز	{'id': 29817374, 'body': 'نسعد بسماع ذلك.', 'modified': '2022-05-18T11:01:25Z'}			en	us	riyad-bank	Thank you to those in charge of the application for the updates and keeping up with everything new in customer service.	ar	thank charge application update keep everything new customer service	Positive	App Store	1	1	0
App Store	9fa719f5-bbe3-40dd-bcbc-61827354092d	العبه ممتازه مره لاتفوتكم	3/10/22 5:22	تطبيق ممتاز				en	us	riyad-bank	Excellent once	ar	excellent	Positive	App Store	0	0	0
App Store	c3bf5729-3b7b-4144-91bd-a760a5c6ce36	Abdullah DH	3/10/22 13:43	نصائح مهمه	{'id': 18340479, 'body': '\r\nعميلنا العزيز، نأمل منك مشاركتنا ملاحظتك عبر البريد الالكتروني info@riyadbank.com و سيتم النظر في الملاحظة بعين الاعتبار.\r\n\r\n', 'modified': '2020-10-08T06:45:26Z'}			en	us	riyad-bank	The application is very nice, but it needs constant development to make it more efficient, more advanced, and with greater capabilities without the need to refer to the branch.	ar	application nice need constant development make efficient advance great capabilities without need refer branch	Positive	App Store	1	0	0
App Store	47d4cfb6-66b9-46c7-81f2-2e03b2d5a023	Nawaf jaber	3/10/22 9:20	بنك الرياض بالاحساء				en	us	riyad-bank	Failure to fully deduct the real estate installment in some months results in arrears in the account, in addition to the delayed deposit of the housing support and the repetition of some numbers in the withdrawal operations and records.	ar	failure fully deduct real estate installment months result arrears account addition delay deposit house support repetition number withdrawal operations record	Negative	App Store	0	1	1
App Store	3fb597f9-8034-4f5c-890d-e17c9c3e9def	jad kash	3/10/22 5:20	Yosef	{'id': 29817351, 'body': 'يسعدنا سماع ذلك.', 'modified': '2022-05-18T11:00:01Z'}			en	us	riyad-bank	Ease, speed, flexibility, and good communication.	ar	ease speed flexibility good communication	Positive	App Store	0	0	0
App Store	b0f98b58-4076-4d80-b9a9-88f644e9b24c	stoopid pubg lolololol	3/10/22 3:59	ممتاز	{'id': 29817345, 'body': 'يسعدنا سماع ذلك.', 'modified': '2022-05-18T10:59:50Z'}			en	us	riyad-bank	Excellent application and easy to use.	ar	excellent application easy use	Positive	App Store	0	0	0
App Store	8cef1c1b-1fb1-4e26-824d-4f47b5dae7d7	احمد ص ابو سلطان	3/10/22 0:18	اقتراح بشأن طريقه سداد القروض المبكره				en	us	riyad-bank	I hope that early loan repayment will be available through the application without having to visit the branch. Just like the option to apply for a loan through the application without visiting the branch, early repayment should also be available through the application, as is commonly practiced in other banks. For example, with Al Rajhi Bank, you can repay a loan early without visiting the branch…	ar	hope early loan repayment available application without visit branch like option apply loan application without visit branch early repayment also available application commonly practice bank example al rajhi bank repay loan early without visit branch repay certain portion loan accord customers preference option repay installments end loan also available application thank hope suggestion take cons…	Positive	App Store	1	1	0
App Store	d7090eac-5f9e-42c3-97d3-ecd924f9dc16	Super921	3/9/22 18:07	التطبيق سهل				en	us	riyad-bank	The application is faster than before.	ar	application fast	Positive	App Store	0	0	0
App Store	edf27ee8-40a5-4736-ad52-0f2c04af3f8a	majid83	3/9/22 17:50	اعتز				en	us	riyad-bank	It's enough that he is my brother.	ar	enough brother	Neutral	App Store	1	0	0
App Store	1f1d816b-6319-4745-a6d6-64bc5ec5a924	kroom1413	3/9/22 14:22	عن بنك الرياض	{'id': 29817318, 'body': 'يسعدنا سماع ذلك.', 'modified': '2022-05-18T10:58:34Z'}			en	us	riyad-bank	"Easier interaction in the application, excellent service. I am happy to be a member of the bank. Thank you."	ar	easy interaction application excellent service happy member bank thank	Positive	App Store	0	0	0
App Store	317abbf2-fb6e-4578-bfb1-c8a3ea7e30b3	naif 1972	3/9/22 16:48	اقتراح	{'id': 29817328, 'body': 'عميلنا العزيز، نأمل منك مشاركتنا ملاحظتك عبر البريد الالكتروني info@riyadbank.com ', 'modified': '2022-05-18T10:59:04Z'}			en	us	riyad-bank	Review and develop the list of registered beneficiaries in the account to make it easier for adding, deleting, and rearranging when searching. Thank you.	ar	review develop list register beneficiaries account make easy add delete rearrange search thank	Neutral	App Store	0	1	0
App Store	b37106c8-b0bb-4324-aa00-07a0bc280ee7	سلطان حمد ٢٠٠٣	2/27/22 16:38	البرنامج زبال				en	us	riyad-bank	The program is garbage because I use face recognition and it only works for one day. The rest of the days it tells me to enter the password, and the password works sometimes and fails sometimes. I'm telling you, change this awful Jewish bank, and thank you to the readers.	ar	program garbage use face recognition work one day rest days tell enter password password work sometimes fail sometimes im tell change awful jewish bank thank readers	Negative	App Store	1	1	0
