# Supplementary material for: Retrieval-augmented generation analysis of user reviews in Saudi mobile banking apps: a comparative user experience study of iOS and Android
Source: PeerJ journal article supplement (doi:10.7717/peerj-cs.3565), 2026-02-06
Supplement: iOS.zip [file sab-mobile_final.xlsx]

## Sheet: Sheet 1 - sab-mobile_final
sab-mobile_final
source	review_id	user_name	review_date	review_title	developer_response	developer_response_date	thumbs_up	language_code	country_code	app_name	review_description	en	cleaned_reviews	Sentiment	ï»¿source	Satisfaction	Effectiveness	Efficiency
App Store	358c8a30-6732-4123-ac3d-286de368ed6a	Boris.bul	2/26/23 6:51	Very useful!				en	ae	sab-mobile	User friendly and easy to navigate	en	user friendly easy navigate	Positive	App Store	0	0	0
App Store	61b02f93-5524-4319-b486-7189d249baee	Paloma Ian	4/25/23 5:25	Great App that is intuitive and easy to use				en	ae	sab-mobile	Banking made simple	en	bank make simple	Neutral	App Store	1	0	0
App Store	6f8c7e3d-73da-43a9-b570-1a120edde805	Pinkbob28	8/25/22 15:46	Super fast and user friendly.				en	ae	sab-mobile	International transfer	en	international transfer	Neutral	App Store	0	1	0
App Store	640da340-f67f-458d-bd64-30226838045a	RasorEdge	8/11/23 16:19	App Review				en	ae	sab-mobile	Excellent, easy to use.	en	excellent easy use	Positive	App Store	0	0	0
App Store	bbf47c6c-a344-4743-8548-8892bae22d27	1344667788	5/17/23 4:54	Mobile iOS app issue				en	ae	sab-mobile	There is lots of Bug I'm facing problem while Iâm opening SAB bank mobile app in my iOS since 2 months but still no changes even after updatedâ¦ Sometime say:- your request cannot be proceed try again even after try so many time still will same. Sometime :- SSL fingerprint not matching kindly check and fix this bug..	en	lot bug im face problem im open sab bank mobile app ios since months still change even update sometime say request proceed try even try many time still sometime ssl fingerprint match kindly check fix bug	Negative	App Store	0	1	0
App Store	5ecc1ae1-c754-46a2-a24b-b10df494ce15	RanenJedd	2/5/23 12:40	SABB Mobile Apps				en	ae	sab-mobile	Great Start.	en	great start	Positive	App Store	0	0	0
App Store	f5733b81-2cd8-43de-ae8e-0a0c4cff77de	اسلام ضيف	5/8/22 9:10	Sabb application				en	ae	sab-mobile	Its the best	en	best	Positive	App Store	0	0	0
App Store	73f47dc8-8f71-4a38-bc8e-5d2d5c03df33	Aukhan83	6/30/22 14:42	Aukhan83				en	ae	sab-mobile	Perfect	en	perfect	Positive	App Store	0	0	0
App Store	cfdf5dcb-0c60-4b4c-8f9f-364afb1d5bd5	Fazeaa473	10/12/22 11:10	Seems 5 star is by SABB itself				en	ae	sab-mobile	Looks like bots of SABB giving 5 stars	en	look like bots sabb give star	Neutral	App Store	1	0	0
App Store	7a19fdcb-246a-463e-8429-16f074a473b7	Hamadah٢٢٠٠	4/3/23 13:56	Manager				en	ae	sab-mobile	Excellent experience	ar	excellent experience	Positive	App Store	0	0	0
App Store	0a98c563-df23-4ee1-86d0-4cf339f42dea	tarkus 2	4/10/22 21:05	Easy to use				en	au	sab-mobile	The system was easy to use and quick for an international transfer. 100%	en	system easy use quick international transfer	Positive	App Store	0	0	0
App Store	c54699cd-9759-4a30-808c-11bba637a816	malik rafie	9/15/22 1:57	Malik rafie				en	au	sab-mobile	Thanks	en	thank	Positive	App Store	0	0	0
App Store	12dc8844-7aa9-4e82-83fc-c10eb0fb7225	Pax BH	5/17/23 18:58	Super easy to use				en	bh	sab-mobile	Reliable & helpful features for day to day banking needs	en	reliable helpful feature day day bank need	Positive	App Store	1	0	0
App Store	16fe44a8-01d8-4a9b-8d71-2b21e8b9da75	AMMARSR	4/14/23 13:46	Great applications				en	bh	sab-mobile	Great application and very functional	en	great application functional	Positive	App Store	0	0	0
App Store	04cebe83-f859-45b8-8119-ea5f5e9f2a46	man help	3/17/23 17:36	SABB mobile				en	bh	sab-mobile	Excellent software	en	excellent software	Positive	App Store	0	0	0
App Store	f32a1212-103b-4428-83bc-c8b725abb18b	aljokaer	7/15/22 5:47	ممتازه				en	bh	sab-mobile	Excellent	ar	excellent	Positive	App Store	0	0	0
App Store	8094fb29-b845-46e5-b7ae-3698201d45d4	ghatamis	8/9/23 17:22	Good experience				en	bh	sab-mobile	The new app suits my needs and expectations	en	new app suit need expectations	Positive	App Store	1	0	0
App Store	1345a190-5d1d-4aa5-8c05-7b28132e3a40	Sabb e.m.	6/6/23 12:07	Premier happy customer				en	ca	sab-mobile	Keep on doing great	en	keep great	Positive	App Store	0	0	0
App Store	e7087526-c421-4947-9d1f-087ed2cffb6f	ASNHFY	7/25/23 9:49	International transfer				en	ca	sab-mobile	Very fast and super easy transfer.Thank you so much.	en	fast super easy transferthank much	Positive	App Store	0	0	0
App Store	887050d5-d5bd-49c9-bc68-146d424dba5d	Feras1985@	4/20/23 7:14	Mr				en	ca	sab-mobile	Very good experience	en	good experience	Positive	App Store	0	0	0
App Store	a9e1edd5-9646-45e0-9417-1463b1086a65	Challenge143	12/31/22 1:14	Excellent bank app				en	ca	sab-mobile	Easy and quick	en	easy quick	Positive	App Store	0	0	0
App Store	df0f722f-f33a-4b66-ba91-decde90c7381	hamoud obied	9/5/22 16:16	خدمات مصرفية رائعه				en	ca	sab-mobile	SAB offers ease of use and services that meet all needs.	ar	sab offer ease use service meet need	Positive	App Store	0	0	0
App Store	f478b668-8bb6-4caf-930b-aeb3630bdeec	Canadian Traveller69232	11/27/22 6:09	Excellent but needs to learn more from HSBC				en	ca	sab-mobile	HSBC Uk has more flexibility and, most important, transactions can be confirmed/validated via their app, not SMS which is very challenging when traveling.	en	hsbc uk flexibility important transactions confirmedvalidated via app sms challenge travel	Neutral	App Store	0	1	0
App Store	727465b7-54e3-47cd-bce9-5e3bafc107cf	nidal 75	11/23/22 13:40	Easy and fast banking business				en	ca	sab-mobile	Love it	en	love	Positive	App Store	0	0	0
App Store	2da18674-9bf2-474a-8916-f230d84c9fe3	Tda24	9/12/22 2:40	Useful				en	ca	sab-mobile	Latest update has so many practical features with no complication	en	late update many practical feature complication	Positive	App Store	1	1	0
App Store	53dd0c12-9cc1-4c22-888d-41034b41fe04	falgones	6/25/22 18:30	Great App				en	ca	sab-mobile	Very fast, simple, supported. Thank you	en	fast simple support thank	Positive	App Store	0	0	0
App Store	c2b1eeaf-bf55-4fac-aa2a-ee28997ec7a2	M ibnan k	5/13/22 8:13	Easy banking				en	ca	sab-mobile	Mobile app is easy to use and gets most of the tasks done.	en	mobile app easy use get task do	Positive	App Store	0	0	0
App Store	666e3b34-349d-47bc-93ff-497b8642799c	IntheDutchmountains	4/26/22 18:57	Very powerful App				en	ch	sab-mobile	For new users some more getting started info and videos would be helpful. Once you master all its capabilities itâs really great	en	new users get start info videos would helpful master capabilities really great	Positive	App Store	0	0	0
App Store	3148acec-3c94-4c91-b679-678bf72738d2	无名指1	7/5/23 5:32	不错				en	cn	sab-mobile	pretty good	zh	pretty good	Positive	App Store	0	0	0
App Store	0ddb7383-a50a-413a-b8c8-32f458601be6	andy_leon	7/7/22 12:44	Very good, Great, Perfect, Awesome, Nice, Amazing				en	cn	sab-mobile	Very good, Great, Perfect, Awesome, Nice, Amazing	en	good great perfect awesome nice amaze	Positive	App Store	0	0	0
App Store	18ce85ff-4191-41ad-8144-263a03edb8e6	John chicha	4/13/23 23:32	Good app				en	co	sab-mobile	Quick and easy to use	en	quick easy use	Positive	App Store	0	0	0
App Store	0f40e75f-1b87-47e0-90bd-56f4fc40cc19	Plot 29	8/25/22 1:45	Bewertung				en	de	sab-mobile	Easy and understandable Perfect!	en	easy understandable perfect	Positive	App Store	0	0	0
App Store	d733feea-65c9-4218-bf3a-19f955e923f4	Mazen Elmasry	3/14/23 20:12	Excellent service				en	de	sab-mobile	Best of the best , thanks SABB Excellent service	en	best best thank sabb excellent service	Positive	App Store	0	0	0
App Store	8983ff89-6786-4251-8277-c6ad07905c79	bassio-magoo	7/8/23 5:48	Very simple and friendly interface				en	eg	sab-mobile	Very simple and friendly interface	en	simple friendly interface	Positive	App Store	0	0	0
App Store	79af8a68-2b29-4a49-8313-6a9011bf4b84	Hamada Zayan	4/15/23 8:40	Great App				en	eg	sab-mobile	One of the best bank applications out there, although having a relationship manager, I donât have the urge to contact every time I need to transact. It covers 99% of our needs.	en	one best bank applications although relationship manager dont urge contact every time need transact cover need	Positive	App Store	1	0	0
App Store	120d23ca-b26d-4359-b96d-6cbac3b1b7ae	Ahmed Motalakeh	5/29/23 11:05	Ahmed Motalakeh				en	eg	sab-mobile	Thanks for SAB process to open accounts online	en	thank sab process open account online	Positive	App Store	0	1	0
App Store	d7491bcd-df53-4c83-ac6d-da65d20a943c	WalidHËGAB	12/27/22 4:19	Amazing SAAB app				en	eg	sab-mobile	360 v is an amazing feature making a full account control ðð»ðð»ðð»	en	v amaze feature make full account control	Positive	App Store	0	1	0
App Store	b0e22573-f74a-40fc-92a8-2502abdb2f16	Tariq1960	8/16/22 7:19	Excellent				en	eg	sab-mobile	As usual , too good to be true	en	usual good true	Positive	App Store	1	0	0
App Store	9d500b02-868c-4691-a41a-ee630aca4a6d	memo.zezo	2/25/22 8:48	New version bug				en	eg	sab-mobile	The last update 6.3 not working at all on iOS	en	last update work ios	Negative	App Store	0	1	0
App Store	5d8060ab-2e42-4c06-b3d3-a14afacbfffe	shebo2020	1/24/23 10:32	Dr.Shehab				en	eg	sab-mobile	best App ever	en	best app ever	Positive	App Store	0	0	0
App Store	190b9bd8-680d-46fd-8ea1-22a01de5d151	Sherio86	6/26/22 9:35	Not safe				en	eg	sab-mobile	After adding my face id , it doesnât require to use verification code, i think my face id should replace my password not the verification code I couldnât add any card to Apple Pay wallet The is no time session to force applicant to log out as the older app I think I should not be able to take screenshots	en	add face id doesnt require use verification code think face id replace password verification code couldnt add card apple pay wallet time session force applicant log old app think able take screenshots	Negative	App Store	0	1	0
App Store	1655a684-ab05-4753-9b47-3389f8abfe5e	Chuwaca	5/27/23 8:56	Great improvement				en	es	sab-mobile	The all is being improved. I donât give five stars as many times it hangs saying something ssl thumbprint.	en	improve dont give five star many time hang say something ssl thumbprint	Neutral	App Store	1	1	1
App Store	1d82420c-b147-46ea-bcb8-738c97290ad0	Hamid Siddique	5/1/23 17:53	Brilliant				en	fr	sab-mobile	Safe and easy !	en	safe easy	Positive	App Store	0	0	0
App Store	b337e96e-0384-4301-a0a9-115c2891b658	zeinasawaya	3/8/22 18:19	Zeinasawaya				en	fr	sab-mobile	Ok	en	ok	Neutral	App Store	0	0	0
App Store	fe29324b-c95d-4c9d-9dd6-56ce83ddf579	ShaunP70	11/28/22 5:08	User Friendly				en	gb	sab-mobile	The SABB app is easy to use and has great functionality. Great for international transfers, all of which can be done at the click of a button. One of my favorite banking apps.	en	sabb app easy use great functionality great international transfer do click button one favorite bank apps	Positive	App Store	0	0	0
App Store	6c2492ef-6b22-4bd8-bd81-b3cc387fdd97	PragmaticFerg	2/20/22 6:43	Good improvement and nice to have access to the umlaty card after 2 years!				en	gb	sab-mobile	Had to reinstall with the latest AP update, as the developers failed to tell employers (SABB) and their customers that they could no longer use â#â in their passwords, ICT are their own worst enemyâ¦. That aside the app is running a lot more smoothly but still locks people out far too soon. And far better than any U.K. banking app. The continental banking apps are still the best, and a good …	en	reinstall late ap update developers fail tell employers sabb customers could long use passwords ict bad enemy aside app run lot smoothly still lock people far soon far good uk bank app continental bank apps still best good bench mark around rest world	Negative	App Store	1	1	0
App Store	8068b373-10a3-4725-91a9-5050c3d63f7d	WD51	8/21/23 4:07	International Transfer				en	gb	sab-mobile	International transfers on SABB Mobile really are so easy to use and very quick now. A big improvement.	en	international transfer sabb mobile really easy use quick big improvement	Positive	App Store	0	0	0
App Store	60ef6c58-e621-4374-9974-a176d891162a	ibnshaib2022	10/2/22 1:20	Certain things hard to find				en	gb	sab-mobile	Many improvements but could do better. Less complications on transfers and less back and forward to move between functions	en	many improvements could good less complications transfer less back forward move function	Positive	App Store	1	1	0
App Store	28091463-158c-4fa9-b09c-408979c0a477	513645	7/24/23 4:08	Fast easy transactions				en	gb	sab-mobile	I can send international transfers in 3 minutes. No crashing, stalling or errors. Very stable and useful app.	en	send international transfer minutes crash stall errors stable useful app	Positive	App Store	0	1	1
App Store	5d870580-3409-4a8e-b902-e6bd319d12ed	Mayada Hejazi	11/28/22 6:50	So frustrating!!!				en	gb	sab-mobile	Getting soooo frustrated with this app. Can you pls STOP forcing us to update! Iâve had several occasions where Iâve needed to carry out a transaction but have been forced to update AND THEN been locked out of my account for a couple of weeks. Too many updates, too often is becoming too much now.	en	get soooo frustrate app pls stop force us update ive several occasion ive need carry transaction force update lock account couple weeks many update often become much	Negative	App Store	1	0	0
App Store	46f58d0f-e435-4c60-9acc-c6aeda692cc2	Mabakhsh	6/14/22 8:45	Rubbish app				en	gb	sab-mobile	Itâs not working at all. Just giving whats new and advertising Al fursan credit card and others.	en	work give whats new advertise al fursan credit card others	Negative	App Store	0	1	0
App Store	1efe848e-b2e6-445f-b110-300fb22c721c	s1eby	6/26/22 13:08	Excellent app and service				en	gb	sab-mobile	Quick, easy and reliable to use	en	quick easy reliable use	Positive	App Store	0	0	0
App Store	999f579a-9289-4a64-8e19-7f24c0d0ba11	25thehouseofpayne	1/30/23 4:45	Best banking app				en	gb	sab-mobile	Great app, extremely intuitive, plenty of functionality and benefits! Would highly recommend SABB	en	great app extremely intuitive plenty functionality benefit would highly recommend sabb	Positive	App Store	0	0	0
App Store	fc46243f-da7c-4c9b-8932-56b9d4b2c7b5	hbaaq	5/29/23 17:08	Exceptional				en	gb	sab-mobile	App is great. Rarely crashes and the interface is easy and simple	en	app great rarely crash interface easy simple	Positive	App Store	1	1	0
App Store	b456fb58-4c5f-424c-8432-ab80b4543c92	Doctor Hisham	5/3/23 14:28	Excellent mobile banking				en	gb	sab-mobile	The best user friendly mobile banking Love it	en	best user friendly mobile bank love	Positive	App Store	0	0	0
App Store	b3c50170-3a95-4296-86dd-87c87f965fcd	Lewislulu	6/28/22 13:14	Online banking				en	gb	sab-mobile	Easy to use, clear and very efficient. I love it	en	easy use clear efficient love	Positive	App Store	0	0	0
App Store	0c54f4a5-7d0d-4423-9c4c-8dfee00512e2	Nick C13	6/18/23 15:52	Great service				en	gb	sab-mobile	Great service easy to follow and very intuitive	en	great service easy follow intuitive	Positive	App Store	0	0	0
App Store	3af00586-32d9-4d1d-9573-059de8f770f5	Unhappy of J'Park	3/5/23 15:50	Mrs D				en	gb	sab-mobile	Easy to use, easy (but secure) to access accounts with 2 step verification.	en	easy use easy secure access account step verification	Positive	App Store	0	0	0
App Store	b37f18b4-9980-444b-b6fa-5efdb2b183a6	Supernovak71	11/24/22 0:02	Brilliant				en	gb	sab-mobile	Use friendly	en	use friendly	Neutral	App Store	0	0	0
App Store	1b62c1aa-58ae-4f49-8b93-063fc9c4f26f	ImranKhan1	7/1/23 19:07	Easy to Use				en	gb	sab-mobile	Reliable and easy to use app.	en	reliable easy use app	Positive	App Store	0	0	0
App Store	8469519a-2b72-417b-a44a-b1bfefb18830	Sir Lima	8/24/22 23:05	Great app				en	gb	sab-mobile	Easy to use and well recommended.	en	easy use well recommend	Positive	App Store	0	0	0
App Store	7c2518a3-73ce-4423-bc02-287943a80f07	Wedge1980	3/30/22 12:24	Landscape ipad				en	gb	sab-mobile	Overall fairly decent update, but the iPadOS version lacks landscape support, which is probably how most people use iPads	en	overall fairly decent update ipados version lack landscape support probably people use ipads	Neutral	App Store	1	0	0
App Store	3108a0a7-b66f-4718-923c-7e440a811c6b	Malky343	5/4/23 11:09	1st use				en	gb	sab-mobile	Simple, well organised and intuitive	en	simple well organise intuitive	Positive	App Store	0	0	0
App Store	5a91d6bd-8ed1-478e-a6ce-733e3c3bc1e1	786Ibrar	6/20/23 7:51	Great App				en	gb	sab-mobile	Good security Easy to navigate Easy to use Just what I need	en	good security easy navigate easy use need	Positive	App Store	0	0	0
App Store	2456f5a6-f3d7-48b1-b777-6581c7b71099	Pennywort Mill	7/25/22 15:50	Top Service From SABB				en	gb	sab-mobile	Very easy to use app, makes life easy!	en	easy use app make life easy	Positive	App Store	0	0	0
App Store	73846e43-8793-4301-b6f2-1aa8476c1b2e	lincolnscot	1/30/23 2:05	Spyware	{'id': 34615882, 'body': 'Dear customer, To increase the level of security in SABB Mobile app and to protect you from fraudulent attempts, we are requesting your geolocation to track any unusual activity on your account', 'modified': '2023-02-01T14:00:44Z'}			en	gb	sab-mobile	Cannot use with a VPN and have to enable location and give permission for your location to be tracked and then cannot auto fill from password manager which encourages the use of weak passwords. Truly awful app	en	use vpn enable location give permission location track auto fill password manager encourage use weak passwords truly awful app	Negative	App Store	1	1	0
App Store	70788338-7b9a-42c8-8e2d-2133194f40d1	R10KGT	12/23/22 11:03	SABB APP				en	gb	sab-mobile	Good APP although I didnât know I had a fund transfer limit	en	good app although didnt know fund transfer limit	Positive	App Store	1	0	0
App Store	9c16097d-0d0e-4da2-8efa-4d5e1f0c67df	Faiz Baig	11/14/22 2:24	Excellent				en	gb	sab-mobile	One of the best banking app I have ever used.	en	one best bank app ever use	Positive	App Store	0	0	0
App Store	97dd3751-9130-45f8-b44c-adf32998aef2	Ammohunk	5/28/22 6:52	Great App.				en	gb	sab-mobile	Easy to use with intuitive UI.	en	easy use intuitive ui	Positive	App Store	0	0	0
App Store	d4e82a3e-9a80-463b-9432-d16537559265	نزار	9/11/22 7:15	Nice application				en	gb	sab-mobile	Convenient and simple	en	convenient simple	Positive	App Store	0	0	0
App Store	4cd38cd2-342c-409c-9908-7a5cac119a15	Kempy19830511	7/25/22 3:23	SABB				en	gb	sab-mobile	Fantastic bank with great customer service.	en	fantastic bank great customer service	Positive	App Store	0	0	0
App Store	4f87c1eb-d9e5-4cc6-ab25-452622518fc1	Donana09	4/24/23 22:23	Best Banking App in Saudi Arabia.				en	gb	sab-mobile	Outstanding features and ease of use.	en	outstanding feature ease use	Positive	App Store	0	0	0
App Store	720386f6-3215-4cc8-afc3-5e199379951d	r9yrich	11/21/22 5:26	Requires location				en	gb	sab-mobile	Requires location so they can track you and allow you no freedom	en	require location track allow freedom	Negative	App Store	1	0	0
App Store	de167b98-7279-4cf1-8eb4-51f890c4ee6d	Sinper shooter	3/28/23 2:36	Sabb mobile				en	gb	sab-mobile	Very good app	en	good app	Positive	App Store	0	0	0
App Store	966fd40f-ce39-4795-a485-9792a257ff08	Giggsy9139	5/13/23 7:32	Good functionality				en	gb	sab-mobile	Happy with app	en	happy app	Positive	App Store	0	0	0
App Store	77239509-1e2a-4590-9f5c-cfd5de0ddc51	El Daviolli	9/15/23 16:27	Great app				en	gb	sab-mobile	Great app	en	great app	Positive	App Store	0	0	0
App Store	dfacc5f8-0996-456a-99e8-439d104339f9	SAB or SABB?	4/11/23 19:04	SAB now or is this a scam?				en	gb	sab-mobile	Would be great if you did some communication to your customers to avoid confusion. Great re-brand by the way, acronym much clearer nowâ¦ NOT.	en	would great communication customers avoid confusion great rebrand way acronym much clear	Positive	App Store	1	0	0
App Store	3db10571-3fc6-4771-9525-a01bed61a15b	Owen_johnowen	11/27/22 9:00	Do not UPDATE!				en	gb	sab-mobile	App has went backwards. Only allows 1 device to be used Disables password managers Defaults to portrait only display on iPAD Do not update your existing app!	en	app go backwards allow device use disable password managers default portrait display ipad update exist app	Negative	App Store	0	1	0
App Store	951f48e3-8877-4127-9bb9-61a76d4cb91b	Smurble	6/20/22 11:57	Great 👍				en	gb	sab-mobile	All good	en	good	Positive	App Store	0	0	0
App Store	ee3e675e-6e9d-4b0d-8ebd-77716a4701d2	Hillytag	6/4/23 7:45	Good				en	gb	sab-mobile	Simon Le-Tres bonne application!	fr	simon letres bonne application	Neutral	App Store	0	0	0
App Store	6fa5c24c-4608-49ac-8692-ed9e9035d7ae	مرراءع	8/30/22 11:15	شكرا لكم				en	gb	sab-mobile	The application is really great, easy, and convenient to the extent that I haven't used my laptop for long periods of time. I suggest adding a link in the application for stocks. At least let us buy stocks for long-term investments, not just for daily trading.	ar	application really great easy convenient extent havent use laptop long periods time suggest add link application stock least let us buy stock longterm investments daily trade	Positive	App Store	1	1	0
App Store	753a8d69-7ecf-4ec4-9277-1ca277b83527	kha200	11/20/22 21:19	تطبيق سيئ				en	gb	sab-mobile	The application is heavy and contains unclear details. Moreover, it forces the user to enable location, which is a clear violation of personal data protection policy.	ar	application heavy contain unclear detail moreover force user enable location clear violation personal data protection policy	Negative	App Store	1	0	1
App Store	c9aacdd8-f175-40ef-9491-981e470d5475	Dr Steffen Sommer	3/28/23 15:21	Adequate				en	gb	sab-mobile	All telepbone notices and confirmation of codes must be in English as well as Arabic. Setting up a credit card on Apple pay only has telephone code confirmations in Arabic	en	telepbone notice confirmation cod must english well arabic set credit card apple pay telephone code confirmations arabic	Neutral	App Store	0	1	0
App Store	aa3a70a0-4141-4fe1-8c81-77e3940341b2	RAK 2002	9/21/23 3:41	Mr khan				en	gb	sab-mobile	Very user friendly and saves the hassle of going to bank for day to day use	en	user friendly save hassle go bank day day use	Positive	App Store	0	0	0
App Store	b4f19191-43ec-4ffd-b30f-4d1fdfa188ab	Ortegaevaaro	5/23/23 7:11	My experience when transacting…				en	gh	sab-mobile	Itâs very easy and fast when doing transactions.	en	easy fast transactions	Positive	App Store	0	0	0
App Store	3494b45e-eee8-4a79-954e-8d6aaa39da41	✔️✔️ethnic	7/9/22 7:10	Good				en	gh	sab-mobile	Sabb	hu	sabb	Neutral	App Store	0	0	0
App Store	411ee4da-223e-45bd-a0ca-ec6a362800e7	Bra Quaicoo	8/24/23 18:16	Account Reset				en	gh	sab-mobile	Account password reset does not work effectively. With all the correct details inputs, it still shows invalid card when the card is still valid.	en	account password reset work effectively correct detail input still show invalid card card still valid	Negative	App Store	0	1	0
App Store	fc6e9e2f-5351-47b6-85ad-ed96165ad4aa	Syafdi	9/11/23 8:49	Excellent				en	id	sab-mobile	Very good and very useful	en	good useful	Positive	App Store	0	0	0
App Store	98449730-0856-4ab5-a844-4ad4de1d0b7e	djnckkkk	5/27/23 20:38	Ok				en	id	sab-mobile	Good	en	good	Positive	App Store	0	0	0
App Store	e13a1a70-8a96-424a-8e25-a2b8d330a705	Tauseef	2/4/23 7:48	Very good app				en	in	sab-mobile	It has everything one needs for banking. The user interface is simple as it should be. In fact after installing the app I have never went on website.	en	everything one need bank user interface simple fact instal app never go website	Positive	App Store	1	0	0
App Store	99e4ae8a-7fdf-4ecf-8236-5723cf2df76c	Hanif@ABM	8/5/23 3:36	The best Bank app ever				en	in	sab-mobile	I have been using at least eight different Bank apps. There is nothing that is even close to SAB ! SAB mobile app is one of the most secure, frictionless and user friendly app. Thank you SAB	en	use least eight different bank apps nothing even close sab sab mobile app one secure frictionless user friendly app thank sab	Positive	App Store	0	0	0
App Store	638cf108-0822-4da8-8a89-1a4bbc012429	SABBKSA	2/26/23 12:56	International Money Transfer				en	in	sab-mobile	Really worked well and easy to transfer money with less time.	en	really work well easy transfer money less time	Positive	App Store	1	0	0
App Store	18b3741b-5622-4cc2-b66c-cefb4b177403	Elvis Pavey	9/11/23 16:27	User friendly				en	in	sab-mobile	Very easy to use app, Good for people to understand with limited knowledge and low education for online stuff,, user friendly and easy for expats	en	easy use app good people understand limit knowledge low education online stuff user friendly easy expats	Positive	App Store	1	0	0
App Store	e1292919-5422-456b-8f0d-94d5bf63e409	ashcell	3/18/22 9:05	Digitalized transformation				en	in	sab-mobile	Using SABBMobile banking service is absolutely amazing . The app is very user friendly and has many features speedier transactions . Keep going and best regards	en	use sabbmobile bank service absolutely amaze app user friendly many feature speedy transactions keep go best regard	Positive	App Store	0	0	0
App Store	cb7c12ea-da31-4444-8139-3636d2cc380f	Ajay Marath	3/27/23 14:03	Transfers				en	in	sab-mobile	The SABB transfer is an efficient way to transfer money locally and overseas. There has never been any issues till now, Alhumdullillah. ðð»	en	sabb transfer efficient way transfer money locally overseas never issue till alhumdullillah	Positive	App Store	1	0	0
App Store	a3399d65-d6a3-43e5-bd4c-5886ee55f56c	Iqbal Hosain Khan	7/24/22 4:32	SABB Bank is best bank in Middle East				en	in	sab-mobile	Very good service, till now I did not face any issues. Easy to use . I am very happy with this. Best bank service.	en	good service till face issue easy use happy best bank service	Positive	App Store	0	0	0
App Store	2b22441c-97d7-4037-a184-5fb19e17ff65	Gaus P	3/4/23 16:20	Customer Satisfaction				en	in	sab-mobile	I am satisfied in using this App , very user friendly and very simple , great work team , keep up the good work, Regards Mohammed Gaus	en	satisfy use app user friendly simple great work team keep good work regard mohammed gaus	Positive	App Store	0	0	0
App Store	8af3dba6-42dc-463e-a838-810f1eaa4c3e	fzl1996	11/30/22 2:17	Sabb				en	in	sab-mobile	This is so use full handy available at any time this made my transfers soo easy as it sayd banking at your fingertips ðð¼	en	use full handy available time make transfer soo easy sayd bank fingertips	Positive	App Store	1	0	0
App Store	264187fe-2c17-4c1f-9a02-bc309c9809f6	excellent browsing experience	6/28/22 13:41	Best user interface				en	in	sab-mobile	Best user interface for any bank I have used so far.	en	best user interface bank use far	Positive	App Store	0	0	0
App Store	6e191903-cc3a-43f6-a47e-289e80a7a2ff	imran8042	12/30/22 23:19	Security				en	in	sab-mobile	New service without location unable to login for safe & secure â­ï¸â­ï¸â­ï¸â­ï¸â­ï¸	en	new service without location unable login safe secure	Negative	App Store	0	1	0
App Store	60f031ef-48d3-425b-b0f7-8d0bcd25a3b5	Ramdan kareem	4/30/22 10:14	Amazing				en	in	sab-mobile	Amazing experience to use Sabb mobile application safe and secure and so convenient for anyone to use.	en	amaze experience use sabb mobile application safe secure convenient anyone use	Positive	App Store	0	0	0
App Store	5f6378bb-bff2-4101-a83f-968d92da81b5	om.ganesha	5/15/22 16:34	Very user friendly looking smart view				en	in	sab-mobile	Very user friendly looking smart view	en	user friendly look smart view	Positive	App Store	0	0	0
App Store	743405c5-cf0e-4539-847c-18e4bc687b51	Hakh Machinchery	2/19/23 13:55	It’s user friendly				en	in	sab-mobile	Itâs very easy and simple. I enjoy using this App.	en	easy simple enjoy use app	Positive	App Store	0	0	0
App Store	9ee54200-5d5b-477c-a25d-492f604b80d9	Praviin K Pandey	9/27/22 8:10	Banking				en	in	sab-mobile	Overall experience of mobile banking is good...	en	overall experience mobile bank good	Positive	App Store	0	0	0
App Store	42be38ce-8bcd-4865-977f-0d5aad75c5e0	saratsaudi	7/10/22 19:07	Good interface				en	in	sab-mobile	Easy transaction	en	easy transaction	Positive	App Store	0	0	0
App Store	75d811cd-e25a-4db7-9bf0-ddf03e1a5a81	ppppppppppppoppoppp	3/23/23 22:19	Simply superb				en	in	sab-mobile	No words to say !! All is good and very much effective and convenient app really !!!	en	word say good much effective convenient app really	Positive	App Store	0	0	0
App Store	3734112c-5b70-4326-b42b-32d1ccf0efb5	Umesh Ojha	1/11/23 14:06	Fantastic				en	in	sab-mobile	From opening the account till operating its very good	en	open account till operate good	Positive	App Store	0	0	0
App Store	c6ef49d1-e769-46c5-bd51-e5a179fbf330	Kishore131	12/24/22 8:42	Friendly App				en	in	sab-mobile	Sabb app has improved greatlyâ¦	en	sabb app improve greatly	Positive	App Store	0	0	0
App Store	40aeb953-f257-4d5c-8537-9aaf2afe344a	Sparky 143	5/30/23 10:24	OTP issue				en	in	sab-mobile	Works great. But unable to receive OTP in remote areas like far in desert ( oil field workers) Need option to receive OTP via E-Mail.	en	work great unable receive otp remote areas like far desert oil field workers need option receive otp via email	Negative	App Store	0	1	0
App Store	97d0133a-4d10-47bc-9e91-abefc33bb6f1	Bashneen	9/3/22 6:15	Good services				en	in	sab-mobile	Thank you for the easy and good services	en	thank easy good service	Positive	App Store	0	0	0
App Store	4aa1d318-af62-439c-89ea-20bf88865e50	bpj1986	8/25/22 6:50	Very good to use				en	in	sab-mobile	Friendly use	en	friendly use	Neutral	App Store	0	0	0
App Store	2827ed48-4c33-4f3c-a574-8ca2fad31479	Taz 19	2/14/23 20:43	Best Banking Application				en	in	sab-mobile	User friendly application with complete banking solutions on finger tips.	en	user friendly application complete bank solutions finger tip	Positive	App Store	1	0	0
App Store	b9b7328f-86dd-43b2-a303-4f5b78c5b334	Nagaraj Srinivasa	11/30/22 7:26	Excellent UI				en	in	sab-mobile	Excellent Navigation & User Interface	en	excellent navigation user interface	Positive	App Store	0	0	0
App Store	26076995-f373-4da4-9054-be2c94993e87	mustada_av1	8/7/22 18:14	Poor customer service				en	in	sab-mobile	Recently I did a Sadad transaction and it is already 1 week still amount not received. Calling several time to customer care but no action. Planning complain to dams	en	recently sadad transaction already week still amount receive call several time customer care action plan complain dam	Negative	App Store	0	1	0
App Store	b69ec00e-a055-410f-9bd2-a6eee2212242	Debojyoti Chakraborty	6/27/22 18:49	Satisfied				en	in	sab-mobile	From first to till i am very satisfied.	en	first till satisfy	Positive	App Store	0	0	0
App Store	8aaefc3a-aa97-4242-8cd3-ffaa414741c8	g ss ddsd a C	8/28/23 11:24	Good experience				en	in	sab-mobile	I like the features	en	like feature	Positive	App Store	0	0	0
App Store	318690d2-6458-4318-8525-e861de433afe	mr zahid	3/2/23 5:43	This good apps and bank				en	in	sab-mobile	So Iâm very lucky	en	im lucky	Positive	App Store	0	0	0
App Store	e96c4a7b-6f84-4b83-ba4f-c3ee34833c2a	FZIAD	9/14/23 17:22	Ipad view				en	in	sab-mobile	the view on ipad is very big and cannot fit the screen, so rating this app low.	en	view ipad big fit screen rat app low	Negative	App Store	1	0	0
App Store	0d362092-f958-43cc-be36-6a96f3cde62e	Olakara@qwer	3/2/23 7:28	Secure				en	in	sab-mobile	Most secure and reliable bank app i have ever used	en	secure reliable bank app ever use	Positive	App Store	0	0	0
App Store	c4b39788-f958-481e-9de7-964956bf14a3	Auminfotech	12/12/22 19:29	Very good banking system				en	in	sab-mobile	Very good banking system	en	good bank system	Positive	App Store	0	0	0
App Store	8d1eeb78-9b40-4302-bc3b-90c4c4372f68	Taher mohammed	11/26/22 11:40	Best Bank Services				en	in	sab-mobile	Nice mobile app	en	nice mobile app	Positive	App Store	0	0	0
App Store	0eb2465e-797f-4356-a6e4-25267d19036d	Sreekanth Varanasi	9/28/22 14:10	Great banking app				en	in	sab-mobile	Easy and safe application	en	easy safe application	Positive	App Store	0	0	0
App Store	b29eef69-da70-4f0d-8bd0-caaef1ea0fb5	Darla Srinivasa	1/31/23 3:54	Excellent				en	in	sab-mobile	Very smooth	en	smooth	Positive	App Store	0	0	0
App Store	5c3aecb8-34b2-40a9-add7-23d3cae4e78d	shajahanchalattil	8/28/22 23:22	All				en	in	sab-mobile	Very good service	en	good service	Positive	App Store	0	0	0
App Store	e3eb4d3f-f708-4025-bfaf-f18ba4ce23f9	prashanth kamatam	4/12/23 3:15	Prashanth Kamatam				en	in	sab-mobile	Very nice, fast and graphics look awesome	en	nice fast graphics look awesome	Positive	App Store	0	0	0
App Store	270102df-270e-495d-bf88-2693341637a2	Sameer Riyadh	1/1/23 21:52	The best Banking App.				en	in	sab-mobile	The best Banking App I have used so far.	en	best bank app use far	Positive	App Store	0	0	0
App Store	074c15f8-c17c-4084-864e-6613c05bd15b	Rajaabhivanth2016	5/7/23 23:16	5 stars				en	in	sab-mobile	Good bank	en	good bank	Positive	App Store	0	0	0
App Store	b4f1da50-6211-42e1-9403-d2e0f028be75	Jishad m	1/22/23 10:16	Good service				en	in	sab-mobile	Good service	en	good service	Positive	App Store	0	0	0
App Store	0dbf0c9e-f79b-42c3-b290-e65f22106d97	anes pallan	9/11/23 8:05	Anespallan				en	in	sab-mobile	The app provides greater facilities	en	app provide great facilities	Positive	App Store	0	0	0
App Store	b7dfb791-9b6b-4a01-b258-868cc9653671	qazi0007	10/26/22 6:31	Very bad update for ios				en	in	sab-mobile	Since one year it is not good for ios. So irritating.	en	since one year good ios irritate	Negative	App Store	1	0	0
App Store	84bfde9b-8ed7-4437-8bf8-17ac46fb3844	nalinan	4/29/23 7:51	Good				en	in	sab-mobile	Write time security	en	write time security	Neutral	App Store	0	1	0
App Store	4967d923-c898-4adf-b149-d223f5177c08	bbsoni	6/1/22 10:59	Bharat				en	in	sab-mobile	Good and friendly application ðð»	en	good friendly application	Positive	App Store	0	0	0
App Store	8caf1498-d0c1-4db5-a48e-df6949c578a5	Ishabbir	3/4/23 5:49	Nice				en	in	sab-mobile	Nice app very smooth to use	en	nice app smooth use	Positive	App Store	0	0	0
App Store	77e4e90f-2cbd-4fcf-87fa-c919695350ae	Yasin Chipolkar	5/1/23 11:15	Awesome				en	in	sab-mobile	Nice Mobil application, handy to use	en	nice mobil application handy use	Positive	App Store	0	0	0
App Store	dc606936-2741-44ff-be04-bcbab8a77364	Manowwar	2/15/22 10:04	Manowwar				en	in	sab-mobile	Excellent service	en	excellent service	Positive	App Store	0	0	0
App Store	0099a898-c2d8-4e66-aed4-ba8434e1112e	DakshRishi	5/29/23 7:22	Very good				en	in	sab-mobile	Very impressed	en	impress	Positive	App Store	0	0	0
App Store	17d022d3-ab32-412f-8552-ac7f5f20145f	ShaheerNh	6/6/22 7:57	Very good App				en	in	sab-mobile	5 stars	en	star	Positive	App Store	0	0	0
App Store	666c1bb0-6ed7-4d82-ad4e-490fe8bc8d3e	SSN2002	4/24/23 19:16	Very happy				en	in	sab-mobile	Yes i am very happy to banking with SAB ð	en	yes happy bank sab	Positive	App Store	0	0	0
App Store	3a8a5317-2763-437e-b826-76599e49dcc4	satish kondepudi	6/27/22 13:57	Excellent 👍				en	in	sab-mobile	This updates app is coolð and awesome ð ð	en	update app cool awesome	Positive	App Store	0	0	0
App Store	c175a732-63df-4f57-9c65-f8d82922b054	roy cherumala	12/23/22 3:30	very nice and user friendly aap				en	in	sab-mobile	very nice and user friendly aap	en	nice user friendly aap	Positive	App Store	0	0	0
App Store	9e953ecc-7145-4a1a-853b-0ec7a1fb0bc5	M sabbir	11/27/22 15:30	Nice App				en	in	sab-mobile	Enjoying this App	en	enjoy app	Positive	App Store	0	0	0
App Store	61b4889d-f8ed-4052-ad01-b8c5ba9cedc9	FahadMahamood4440	2/24/23 20:54	Review				en	in	sab-mobile	Very Good and Helpful	en	good helpful	Positive	App Store	0	0	0
App Store	3e9fb083-787f-44ac-a41a-1db31f5f60a8	shan Sanjeliya	6/28/22 4:28	Shaaan sanjeliya				en	in	sab-mobile	The best bank with the best app	en	best bank best app	Positive	App Store	0	0	0
App Store	cf45d68f-1d08-4289-b27b-b3522365dc8c	TASAUD	9/18/22 20:06	SABB online banking				en	in	sab-mobile	Worst ever. Very poor support from SABB CUSTOMER Care . Always false commitment and response from them.	en	bad ever poor support sabb customer care always false commitment response	Negative	App Store	1	0	0
App Store	d0f2cf0b-29e2-420c-819e-6f547befbf5d	Shafi muscat	12/2/22 6:23	Awesome				en	in	sab-mobile	Best services	en	best service	Positive	App Store	0	0	0
App Store	f7650da9-bb88-4ec4-987b-b2bb0eb70760	Ahsan bakhshi	5/1/22 21:17	Review				en	in	sab-mobile	Very happy ð	en	happy	Positive	App Store	0	0	0
App Store	dad6890a-47dc-495c-8f5c-f93620ad546e	Deepak TV	6/19/22 18:23	Deepak T Venugopal				en	in	sab-mobile	Very good aap	hi	good aap	Positive	App Store	0	0	0
App Store	6b888cef-f6eb-43db-b38e-d00690db9e00	SyedShahid1988	8/31/23 5:01	App				en	in	sab-mobile	Itâs Simply Awesomeâ¦ð¤©ð¤©ð¤©	en	simply awesome	Positive	App Store	0	0	0
App Store	f55b8e59-7ef0-490f-8961-999f3bc0559a	shajeebu	5/26/23 8:29	Nice				en	in	sab-mobile	Best app	en	best app	Positive	App Store	0	0	0
App Store	fbd34348-fc76-46e0-8852-5c94e0a83cff	Premeesh	12/22/22 6:08	Super				en	in	sab-mobile	Super	en	super	Positive	App Store	0	0	0
App Store	ecb26fd3-2830-48f4-bb1f-89175945c511	Imtayaz Excellent	6/12/23 14:13	Excellent SAB				en	in	sab-mobile	Excellent SAB ð	en	excellent sab	Positive	App Store	0	0	0
App Store	7a1e8b59-140c-4ad2-8e09-0596be809d60	rahufsabb	7/19/22 9:32	Sabb				en	in	sab-mobile	Nice and convenient	en	nice convenient	Positive	App Store	0	0	0
App Store	2eb2ab01-dbe8-42ee-81a0-72ff252e008e	ak smart mobiles	7/22/22 11:17	Transfer				en	in	sab-mobile	Transfer	und	transfer	Neutral	App Store	0	1	0
App Store	53a338fb-b95f-491f-86f3-a3253bb63e26	Manoj Gangadharan	8/22/23 17:51	Forgot Username				en	in	sab-mobile	Very bad information support from sabb bank.atm pin is 4 numbers they are showing 6 digits I lost my first card And I couldnât open by new mada card.	en	bad information support sabb bankatm pin number show digits lose first card couldnt open new mada card	Negative	App Store	1	1	0
App Store	4196dec4-8e1c-48fe-a633-27d955b1cffa	El_Magnifique	12/13/22 20:39	Excellence in everything				en	jo	sab-mobile	Great bank, great team, great service, great everything	en	great bank great team great service great everything	Positive	App Store	0	0	0
App Store	ce918773-34db-4da2-ac8e-accd0fa0ca33	mamanabshele	3/19/22 19:38	Cfghjj				en	jo	sab-mobile	Cfgdhdjdhid	mt	cfgdhdjdhid	Neutral	App Store	1	0	0
App Store	77daa11f-42fe-4290-b875-ecc4cc063722	katsroy	6/28/23 10:26	User friendly service when transferring money				en	ke	sab-mobile	Keep it up	en	keep	Positive	App Store	0	1	0
App Store	940beb6b-4dc5-4929-963b-d120b2ae71b1	Alishikanga	4/6/22 14:37	Mobile wallet				en	ke	sab-mobile	Better option	en	good option	Neutral	App Store	0	0	0
App Store	268af935-5697-4b46-a6cf-6807d52beb63	Mokhaled72	8/25/22 23:01	Mokhaled72				en	kw	sab-mobile	Very good and easy transaction	en	good easy transaction	Positive	App Store	0	0	0
App Store	03fae096-c882-478d-9694-6e47e0aceedb	Arlene 18	4/4/22 7:57	Transfer at SABB				en	kw	sab-mobile	Fast and convenient. Thanks	en	fast convenient thank	Positive	App Store	0	0	0
App Store	ebd15d4a-8167-49c9-bfae-3ac2d65e6f82	moh ali 1	7/21/22 13:46	Rating				en	lb	sab-mobile	I love the new app. Especially sabb 360. But could you fix the Categories even better. Lugmety (a food app) is being considered as transportation. Please fix this!	en	love new app especially sabb could fix categories even good lugmety food app consider transportation please fix	Positive	App Store	0	0	0
App Store	6c678a3f-7cd7-4950-8a50-650545f17756	Fahad.k90	5/29/23 13:04	Good				en	mx	sab-mobile	Good app	en	good app	Positive	App Store	0	0	0
App Store	416ddaae-3f0e-4ddc-9729-497a10644051	anakkerani	7/27/22 12:20	Convenient & Easy Use				en	my	sab-mobile	The interface is really easy for user to conduct my daily needs	en	interface really easy user conduct daily need	Positive	App Store	0	0	0
App Store	f73b4bf5-5ea9-4f0b-b55d-5d14e1da4b4a	KayYnb	7/19/23 23:34	Superb bankapps				en	my	sab-mobile	User friendly with customs menu	en	user friendly customs menu	Positive	App Store	1	0	0
App Store	cb6e5a7b-9636-48a6-8b70-d750cbdd6247	sofieamanda	2/28/23 18:48	Good apps				en	my	sab-mobile	Smooth and easy	en	smooth easy	Positive	App Store	0	0	0
App Store	ed3a223c-3464-4175-97a9-b6dbc39dd38a	haikal.khairuddin	11/9/22 10:19	Can’t break waafer account				en	my	sab-mobile	Canât break waafer account. Even come to office they dont have procedure for this.	en	cant break waafer account even come office dont procedure	Negative	App Store	0	1	0
App Store	7a47ef85-2aa8-4f6c-9e66-57997099c38e	alrynw	6/3/23 7:35	Eva				en	my	sab-mobile	Very good very convenient	en	good convenient	Positive	App Store	0	0	0
App Store	1e1914fd-2a97-4e8a-a760-e06d8c166af9	elfykay	6/30/22 9:17	Review your sabb net.				en	ng	sab-mobile	Need sabb to review the beneficiary currency that is not editable when adding a new international beneficiary.	en	need sabb review beneficiary currency editable add new international beneficiary	Neutral	App Store	0	1	0
App Store	5e001135-1390-494c-9410-d4f693656485	Serve Funk	4/6/23 7:28	Great banking app 🤩				en	nl	sab-mobile	Users friendly	en	users friendly	Positive	App Store	0	0	0
App Store	5215f265-e218-4285-8d77-54fa8f41d72e	CreedApollo	4/18/23 11:59	Easy transaction				en	ph	sab-mobile	To Whom It may Concern, Thank you for smooth and easier remittance to Philippines. Online banking is secured since every time we login, requires OTP sent to the mobile. I would like to suggest to add M Lhuiller, Western Union and Cebuana Lhuiller in the bank selection in Philippine country so that much more options to send. More Filipinos choose to send and use STC Pay and Enjaz or any other remi…	en	may concern thank smooth easy remittance philippines online bank secure since every time login require otp send mobile would like suggest add lhuiller western union cebuana lhuiller bank selection philippine country much options send filipinos choose send use stc pay enjaz remittance application good monopolize send one saab mobile application hop kind consideration creed apollo nelmida	Positive	App Store	1	1	0
App Store	6f464d3a-1569-47d8-b9db-5804c4d9c58f	TennV	7/11/22 7:42	User friendly				en	ph	sab-mobile	Intuitive and easy	en	intuitive easy	Positive	App Store	0	0	0
App Store	7092e359-597c-4ac4-a382-af859587c57a	mikel_0858	3/28/23 4:46	Sabb mobile experience				en	ph	sab-mobile	All transaction can be done online anytime at your convenience.	en	transaction do online anytime convenience	Neutral	App Store	0	1	0
App Store	a157ce69-1f66-4192-9a84-62f2fadbd9a8	Nathandave	6/12/23 3:20	SABB mobile				en	ph	sab-mobile	The app is very convenient to use and super helpful in all online transactions. Kudos to SABB for making this app.	en	app convenient use super helpful online transactions kudos sabb make app	Positive	App Store	1	0	0
App Store	800d512a-7f0b-41a7-8984-e8f6eedb9df1	JerrisonP	4/4/23 18:30	User Friendly App				en	ph	sab-mobile	The new SAB App is easy to navigate and a user friendly app.	en	new sab app easy navigate user friendly app	Positive	App Store	0	0	0
App Store	c5346d53-021f-4225-a83f-edcb83d9b6ba	yanbuteam	8/29/23 16:16	abv				en	ph	sab-mobile	Very usefull especially if you dont have time to go out,,, ð«¡	en	usefull especially dont time go	Neutral	App Store	1	0	0
App Store	c627d0b2-91ce-49f5-9d7b-5bb41b9a06bb	Tito jr.	4/12/23 8:10	Mobile transfer				en	ph	sab-mobile	Quick ang easy	fil	quick ang easy	Neutral	App Store	0	0	0
App Store	215cab31-ecf5-41a8-bd95-66f4f7f039b4	Oderflide	6/27/22 16:29	SABNet				en	ph	sab-mobile	Very helpful app on doing all my financial transactions online.	en	helpful app financial transactions online	Positive	App Store	1	0	0
App Store	fcdf8a01-c853-449b-80a2-a60e84626566	judah2440	6/27/22 0:51	Superb				en	ph	sab-mobile	Very user friendly and accessibility is 100% helpful! ð	en	user friendly accessibility helpful	Positive	App Store	0	0	0
App Store	bdf8ae6c-7e86-43fd-a0e2-b6fe3cbb2d5c	Angelosoliven901111	2/1/23 19:16	OTP				en	ph	sab-mobile	please lengthen the time for OTP input. Your message comes late.	en	please lengthen time otp input message come late	Negative	App Store	0	0	1
App Store	c776a016-ad26-4f9e-b03b-d34d65a78297	dimebag23	5/30/23 7:36	Good as always				en	ph	sab-mobile	5 star	en	star	Positive	App Store	0	0	0
App Store	c5c1312b-7ae7-4d34-8936-92f789a3caf6	baho uten	3/24/23 3:15	Usage				en	ph	sab-mobile	Excellent and fast	en	excellent fast	Positive	App Store	0	0	0
App Store	4d7103f7-bcd0-4656-a67e-17c95de6b98a	Rocket Racoon	1/12/23 6:14	Rebiew if SabbMobile App				en	ph	sab-mobile	User friendly and efficient app.	en	user friendly efficient app	Positive	App Store	0	0	0
App Store	21a2672c-0198-4c01-be91-6adbf494d6c4	Pol Muji	3/23/23 15:17	Great app				en	ph	sab-mobile	What an experience for an online banking. Thanks SABB.	en	experience online bank thank sabb	Positive	App Store	0	0	0
App Store	e23e0944-1937-4413-a009-90f565c5526a	Noel1825	7/27/23 16:59	Feedback				en	ph	sab-mobile	Keep it up. Thanks.	en	keep thank	Positive	App Store	0	0	0
App Store	116ce8c3-81e4-4017-b5ed-4d21fbb2be4d	Sarah Usop	3/30/23 9:58	Sarah Usop				en	ph	sab-mobile	User Friendly	en	user friendly	Neutral	App Store	0	0	0
App Store	f49ac79f-13de-4e17-b01f-f4ade72c5ca7	Dec IOS	7/3/23 11:34	ExpatDench				en	ph	sab-mobile	Very helpful at this New normal...	en	helpful new normal	Positive	App Store	1	0	0
App Store	98c9de08-b552-443c-a2d9-1aa093dfa396	Jie19830429	6/27/22 23:05	Excellent				en	ph	sab-mobile	Great Service	en	great service	Positive	App Store	0	0	0
App Store	ddbf7cae-7109-4b3f-bfbb-a05216122316		5/28/23 2:24	Ssl finger not matching				en	ph	sab-mobile	Already reinstall always ssl finger not matching so annoying to log in	en	already reinstall always ssl finger match annoy log	Negative	App Store	1	0	0
App Store	4964d362-05c2-4e22-97ec-a1e5840b2828	Jhemaut	9/30/22 3:32	Very nice				en	ph	sab-mobile	Super nice	en	super nice	Positive	App Store	0	0	0
App Store	f1be8384-628c-4bf5-ba5b-73757b9a7f30	19-lms	3/5/23 5:40	Awesome !				en	ph	sab-mobile	Compact and Handy	en	compact handy	Positive	App Store	0	0	0
App Store	3ae98258-8493-4346-a804-c1df5407f17b	TotoGil	3/2/23 5:17	SABBMobile				en	ph	sab-mobile	Ease of use.Fast	en	ease usefast	Neutral	App Store	0	0	0
App Store	e098ecc4-2f5d-45a1-9433-d85e704b778f	chrisam32	12/27/22 0:08	Awesome review				en	ph	sab-mobile	Great Bank.Keep it up.!!!	en	great bankkeep	Positive	App Store	0	0	0
App Store	f6fe8a0d-b681-4d6e-bf27-fef4b245812a	Waj the One	2/17/23 10:14	International Transfer				en	pk	sab-mobile	Service is quick and user friendly, however conversion rates need to be improved and market competitive	en	service quick user friendly however conversion rat need improve market competitive	Positive	App Store	1	0	0
App Store	01b0f5d2-c9bc-472f-870f-8bae79db02cc	jawad zeb	2/11/23 9:19	Quality service				en	pk	sab-mobile	Sabb online is proving good and quality service.	en	sabb online prove good quality service	Positive	App Store	0	0	0
App Store	bc57f186-48cc-47b8-b3cb-b61bd965c3df	Abdul Waheed AD	6/12/23 5:22	Abdul Waheed AD				en	pk	sab-mobile	Feel comfirtable while using this app, it's user friendly	en	feel comfirtable use app user friendly	Positive	App Store	0	0	0
App Store	f233110e-a607-4825-b9f8-29b392ff2ec2	SNIPER SHOOTER WAQAS	3/16/23 2:52	SABB BANK				en	pk	sab-mobile	Awesome innovation very easy to you and easy and very safe excess to the account.	en	awesome innovation easy easy safe excess account	Positive	App Store	0	0	0
App Store	c43ce808-152e-469b-b920-d643e1800991	Farzain Aziz Khan	7/31/22 9:14	Banking				en	pk	sab-mobile	It is very nice and easy to use it.	en	nice easy use	Positive	App Store	0	0	0
App Store	02e90073-fac3-4d2e-83cf-3f5d3546bf66	HaroonrKhan	6/17/22 7:48	SABB online				en	pk	sab-mobile	Good App with all banking features.	en	good app bank feature	Positive	App Store	0	0	0
App Store	016c8604-24f2-498e-9326-7d874bda5049	Shafique Hussain Parachinar	5/27/22 7:24	Good one				en	pk	sab-mobile	Try to make the services more secure, great experience	en	try make service secure great experience	Positive	App Store	0	0	0
App Store	837fd2d1-a45b-4743-9d17-dfa5f13d9ac1	Sadiqjan	3/18/22 18:17	Good				en	pk	sab-mobile	Very good and quick	en	good quick	Positive	App Store	0	0	0
App Store	ce9a40af-9003-46ed-8145-18a2ef52e188	Saqib Ali1976	8/2/22 10:58	Really Excellent application				en	pk	sab-mobile	Really Excellent application	en	really excellent application	Positive	App Store	0	0	0
App Store	dcf66de7-7a7d-4145-942c-053fd9399c8e	misfer almalki	7/15/22 18:44	Very easy				en	pk	sab-mobile	Thank you SABB for this application â¤ï¸ð	en	thank sabb application	Positive	App Store	0	0	0
App Store	5914fa08-91cc-4447-a168-0aa1327c99c9	Af001100	3/29/23 20:29	Very good app				en	ro	sab-mobile	Very good banking app. Has improved a lot and it shows the bank professionalism	en	good bank app improve lot show bank professionalism	Positive	App Store	0	0	0
App Store	7d6b82c9-ba9d-4fbb-9106-fb3d34167e6c	TimoM2022	10/5/22 10:51	Application stopped work three days ago				en	ru	sab-mobile	Application stopped work 3 days ago. I see error C005. Customer service confirmed no issues.	en	application stop work days ago see error c customer service confirm issue	Negative	App Store	0	1	0
App Store	3366f91c-8f1a-459e-83d6-2875d05d6307	Maza143	4/1/23 2:23	Amazing				en	sa	sab-mobile	Great, I'd be happy to write a review of the SABB bank app! Overall, I found the SABB bank app to be a user-friendly and convenient way to manage my finances on-the-go. The app offers a wide range of features that allow users to easily check their account balances, view transaction histories, transfer funds, and pay bills. I particularly appreciated the app's easy-to-use interface and the ability…	en	great id happy write review sabb bank app overall find sabb bank app userfriendly convenient way manage finance onthego app offer wide range feature allow users easily check account balance view transaction histories transfer fund pay bill particularly appreciate apps easytouse interface ability quickly navigate different section	Positive	App Store	1	0	0
App Store	1efc478e-71ed-45d2-bc11-027c7dbee067	akhtarma	5/26/23 5:30	Excellent SAB service😊				en	sa	sab-mobile	There is no doubt that SAB bank is providing excellent service on their digital app and always updating it to meet customer needs. As a satisfied customer, I highly recommend their banking services to anyone who values convenience and efficiency. Their commitment to understanding customer requirements and staying up-to-date with the latest technology is truly impressive!	en	doubt sab bank provide excellent service digital app always update meet customer need satisfy customer highly recommend bank service anyone value convenience efficiency commitment understand customer requirements stay uptodate late technology truly impressive	Positive	App Store	1	0	0
App Store	0f304e09-e4a3-4bbe-a6e2-9cda0dd05dd4	Mosadgasm	2/27/22 12:59	Frustrating				en	sa	sab-mobile	Most of the time it updates the system locks my digital secure key and I have to go for a hell of procedure to reactivate online baking again. Most of the time the updates change the whole layout of the app without a true addition. This keeps confusing me. The last update I again lost my digital secure key and never managed to activate it despite several attempts. Also even with the digital secur…	en	time update system lock digital secure key go hell procedure reactivate online bake time update change whole layout app without true addition keep confuse last update lose digital secure key never manage activate despite several attempt also even digital secure key still need send confirmation sms cod really frustrate abroad access saudi mobile lastly transfer money remove reference section confi…	Negative	App Store	1	1	0
App Store	ba62da46-c295-4f78-8dd6-235cc6d2ac23	HATeeet	3/10/23 6:49	Overall good but Just Delay				en	sa	sab-mobile	We need to speed up the Coustomer pending case.. I have one fraud case since Augustâ22 and till date not be followed up neither I get any response from the Coustomer support to mention that itâs in process or delayedâ¦ I was told that will take 30 maximum days to be refunded but so far more 30 days Iâm still waiting for their response.	en	need speed coustomer pending case one fraud case since august till date follow neither get response coustomer support mention process delay tell take maximum days refund far days im still wait response	Negative	App Store	0	0	1
App Store	86cd9370-f99a-438f-9e2d-ca2a5732cd66	Ibraheju	2/19/22 14:21	Worst Update Ever				en	sa	sab-mobile	Honestly, I was in love with the previous design, among 6 different Banks Applications I use on a daily basis, SABB was the best with the most modern and user-friendly interface. It is true that it was in need of some enhancements to the UX (user experience), but definitely not like this. After updating, I found it difficult to use, with a poor and messy design. I highly recommend that you consid…	ar	honestly love previous design among different bank applications use daily basis sabb best modern userfriendly interface true need enhancements ux user experience definitely like update find difficult use poor messy design highly recommend consider revert previous version minor ux enhancements first time leave review couldnt stay silent late update bad design user experience become hard bad unfort…	Positive	App Store	1	0	0
App Store	2cc6331e-9725-42bd-aa82-bd62ed98795a	Dalal1433	8/30/23 20:15	Provide the balance without signing in				en	sa	sab-mobile	I agree with the One reviewer that requested this .. Bank of America also provides the quick balance view. Internet connection isnât always quick and sometimes I just want to see my balance without the hassle of signing in.	en	agree one reviewer request bank america also provide quick balance view internet connection isnt always quick sometimes want see balance without hassle sign	Negative	App Store	0	1	0
App Store	3c180460-82ff-40c5-ad4b-007ddb3c5f1a	DanteXTeufel	5/17/23 18:05	It took sometime to get used to it, now I can’t imagine life without it				en	sa	sab-mobile	The new update is really amazing. It really gave me insights into my spending and, altogether itâs an amazing way to do banking. I didnât like the update at first, nobody loves change in their banking interface or usability. However, with the new SAB 360â¦ I canât imagine life without it.	en	new update really amaze really give insights spend altogether amaze way bank didnt like update first nobody love change bank interface usability however new sab cant imagine life without	Positive	App Store	1	0	0
App Store	b58c9281-e7c8-486f-a5af-3bd35ca8dde4	برنامج وسط	12/17/22 7:30	Average				en	sa	sab-mobile	The app provides basic services and the followings need update: - Only 1 device is registered (I have an iPhone and iPad). Every time I have to wait for a call to confirm the 2nd device. - Alfursan credit card doesnât show how to redeem the points, besides the points collected differ from one purchase to another without explanation. - The app doesnât fit the iPad screen. It is clearly built f…	en	app provide basic service followings need update device register iphone ipad every time wait call confirm nd device alfursan credit card doesnt show redeem point besides point collect differ one purchase another without explanation app doesnt fit ipad screen clearly build small screen	Negative	App Store	1	1	0
App Store	d0395b25-93cc-4ecf-855c-184d34c789dc	Gravious Fir	2/11/23 8:57	Convenient and user friendly interface				en	sa	sab-mobile	Updated version is very convenient and user friendly 360 is admiring feature customization options at glance are best feature.	en	update version convenient user friendly admire feature customization options glance best feature	Positive	App Store	0	0	0
App Store	dde227d0-ce84-42e9-a047-46efa84bb977	Anas Wazani	6/30/23 14:51	Consistent!				en	sa	sab-mobile	App is very consistent and friendlyâ¦ Cons: Needs some user experience and interface enhancements (logging in, speed, page transition) + screen still shows balances for a short duration (2 seconds) after accessing application after inactivity	en	app consistent friendly con need user experience interface enhancements log speed page transition screen still show balance short duration second access application inactivity	Neutral	App Store	1	0	1
App Store	42c92c53-3695-4eff-8fef-ac6817787eac	safsafpuresaf	8/14/23 11:37	A really nice and functioning app				en	sa	sab-mobile	the app is really great in comparison to other bank apps like the SNB the wallet feature is amazing and the app rarely maintenance which is key if you are transferring between account at late hours. really great Thank you and keep up	en	app really great comparison bank apps like snb wallet feature amaze app rarely maintenance key transfer account late hours really great thank keep	Positive	App Store	1	0	0
App Store	325be05d-1682-4d1d-93f1-04799f174b3b	Ibrahim M.	2/28/23 16:15	Sudden crash in app				en	sa	sab-mobile	I used to run all my bank accounts activities using the mobile app on my iPhone. Today, I faced 2 times app crash during its use. Appreciate your support to fix the matter.	en	use run bank account activities use mobile app iphone today face time app crash use appreciate support fix matter	Neutral	App Store	0	1	0
App Store	4c66dc7a-4a1b-42c4-8edb-e8d2aba1f7b4	Sonyboy Fugaban	5/15/22 7:19	Convenient Features				en	sa	sab-mobile	Since the last update a year ago, I havenât experienced any issue so far. The improvements/updates on the app are certainly working well.	en	since last update year ago havent experience issue far improvementsupdates app certainly work well	Positive	App Store	0	1	0
App Store	df35fe9d-a67b-460e-96ee-1fbf6d44315c	ChSahab	5/18/22 20:42	Problem in Refresh of current status “Your Product”				en	sa	sab-mobile	Whenever after transaction done changes is not reflecting even we are drag down the apps to refresh but data is not refreshing specially for credit Card data, Please try to fix this bug in this update, previous update were not having this issue. Thanks	en	whenever transaction do change reflect even drag apps refresh data refresh specially credit card data please try fix bug update previous update issue thank	Negative	App Store	0	1	1
App Store	a020bae3-9b40-4081-a41e-227b073d2756	Jab at	2/2/23 11:37	Browsing stability				en	sa	sab-mobile	While choosing options on transfer detail page etc, browsing is not stable mean up and down	en	choose options transfer detail page etc browse stable mean	Negative	App Store	1	0	0
App Store	105c90c3-9dc7-40de-9570-29c238c33c97	Mr. KMC	6/21/23 12:30	Feedback				en	sa	sab-mobile	Ø§ÙÙØ­ÙÙ ÙØ¯Ù ÙÙÙÙÙ ð¤²ð One of the best bank in the country and I'm registered since 2013 and enjoying the whole bunch of services debit and credit cards within and out of country. Stay blessed ð¤² Great team	en	one best bank country im register since enjoy whole bunch service debit credit card within country stay bless great team	Positive	App Store	0	0	0
App Store	42da73b1-6d3d-4ce6-8b8a-acdbe50cadf4	GreenGlobe	10/25/22 22:50	Version 6.5.9				en	sa	sab-mobile	This is the worst version of the, apart from asking you to close any virtual network you may have, it keeps asking you all the time whenever you start the program to register your device via a call, when you receive the call and press 1 for registration, next time it asks you the same thing. Getting into your account with this version 6.5.9 is not smooth at all	en	bad version apart ask close virtual network may keep ask time whenever start program register device via call receive call press registration next time ask thing get account version smooth	Negative	App Store	1	1	0
App Store	ff14097f-3498-4df1-ac74-36c1f2056f12	Yazid Alhusain	2/25/23 9:15	Not the best but good enough.				en	sa	sab-mobile	The app is okay but its not nothing compared to Alrajhi or other international banks. I cant choose to remove or add the accounts i want to see from the app. I have to go to the web page for that. I think it improved a lot tho.	en	app okay nothing compare alrajhi international bank cant choose remove add account want see app go web page think improve lot tho	Neutral	App Store	0	1	0
App Store	f41aeaee-8150-484f-91f3-79cca4f0fade	Pinorom	3/6/22 10:38	Poor navigation				en	sa	sab-mobile	The app has poor navigation. After going to all the steps in the credit card payment process and confirmation, you will need to dismiss all the previous steps to go back to the main screen. It is very confusing. I am using iPhone 13 with iOS 15.2.	en	app poor navigation go step credit card payment process confirmation need dismiss previous step go back main screen confuse use iphone ios	Negative	App Store	1	1	0
App Store	ac350357-fb18-47be-990f-2adbb7129769	Omaragi	2/27/23 12:11	perfect app				en	sa	sab-mobile	In terms of ease of use I rate it 5/5 In terms of services availability i rate it 5/5 Although when I make any financial transaction it get the SMS after two or three minutes which is very late.	en	term ease use rate term service availability rate although make financial transaction get sms two three minutes late	Neutral	App Store	1	1	0
App Store	f3ae1e87-623d-405d-b5fb-b07a7ed4bc87	Ahmad Harthi	12/10/22 20:54	Massive Improvement	{'id': 9449816, 'body': 'Dear SABB Customer, \nPlease update to the latest version of SABBMobile application and try again, If this issue still exists please contact us and attach a screenshot of the problem with your contact information through the below email sabbcustomercare@sabb.com \nBest Regards, \nSABB Customer Care Team', 'modified': '2019-07-01T23:34:09Z'}			en	sa	sab-mobile	Finally, SABB is making something that stands up to its name! The app is great with minor bugs here and there but thatâs expected for a new release, and Apple Pay feature is finally there.	en	finally sabb make something stand name app great minor bug thats expect new release apple pay feature finally	Positive	App Store	1	1	0
App Store	ee204887-52cd-4f8f-a896-94ebc6b0835f	Atif Maqbool Shah	7/29/23 9:28	Atif Maqbool				en	sa	sab-mobile	Outstanding service. The best bank in KSA or maybe in ME. Keep growing smarter and more efficient. Also plz ease out laborer account opening and online usage for their home transfer facility online. SNB has it. Thanks again.	en	outstanding service best bank ksa maybe keep grow smart efficient also plz ease laborer account open online usage home transfer facility online snb thank	Positive	App Store	0	0	0
App Store	9ecb3851-a366-42ea-9ebb-479300f1766f	TerryDenton	2/2/23 1:51	Progressive +				en	sa	sab-mobile	Having been a SABB customer for 20-years, I have been delighted watching and experiencing the Banks customer ongoing interface improvements over this time - keep up the good work ð	en	sabb customer years delight watch experience bank customer ongoing interface improvements time keep good work	Positive	App Store	1	0	0
App Store	8f01bf22-edd7-4b0d-894a-15c71d9ddd9c	General Abdelfatah Sisi	4/12/22 1:40	Include face recognition login				en	sa	sab-mobile	Great app, very user friendly with many options. Would be even better with face recognition login like the other HSBC apps instead of having to type your password every time you login.	en	great app user friendly many options would even good face recognition login like hsbc apps instead type password every time login	Positive	App Store	1	0	0
App Store	f012d8da-255c-4f42-9de9-650c220d8e58	UncleCom	6/29/22 6:33	Website feature isn't in mobile	{'id': 9449832, 'body': 'Dear SABB Customer, Please update to the latest version of SABBMobile application and try again, If this issue still exists please contact us and attach a screenshot of the problem with your contact information through the below email sabbcustomercare@sabb.com Best Regards, SABB Customer Care Team', 'modified': '2019-07-01T23:35:52Z'}			en	sa	sab-mobile	Would be amazing to have direct transfer feature that in website to be in mobile app	en	would amaze direct transfer feature website mobile app	Positive	App Store	1	0	0
App Store	51c03710-6b8f-4c9c-9e27-fdf3ac2b31a5	irfan2022	9/30/22 16:30	Best Mobile App in the kingdom				en	sa	sab-mobile	Iâve been using this app from day one I got the account created this is one of the best mobile app with best user navigation and great look and feel. Nice app keep enhancing all the best :-)	en	ive use app day one get account create one best mobile app best user navigation great look feel nice app keep enhance best	Positive	App Store	0	0	0
App Store	858e9f11-044f-40b2-8dac-6ffe4c478c88	Ljain_	8/4/23 19:03	Keep making it better				en	sa	sab-mobile	I love the new changes to the app, I hope it keeps updating their digital banking to the better version.	en	love new change app hope keep update digital bank good version	Positive	App Store	1	0	0
App Store	ec7fe6d7-8366-4b8a-8a06-28be9b9bc71d	Fouad 2	5/31/23 13:17	Fofo				en	sa	sab-mobile	The application can be better and it needs to be faster, the waiting time while making any transaction is long.	en	application good need fast wait time make transaction long	Neutral	App Store	1	0	1
App Store	64fc93e0-808b-48ea-9306-ee117e23947e	abo Abdul99	8/24/23 21:37	Doesn’t working				en	sa	sab-mobile	This app doesnât working I donât recommend. I think using SABB website more useful then wasting time by trying again	en	app doesnt work dont recommend think use sabb website useful waste time try	Negative	App Store	1	0	1
App Store	8befffcc-dce2-4211-b094-1b1b5bafbbde	Bu-Ahmed..1111	6/4/22 11:04	Landscape Orientation on iPad				en	sa	sab-mobile	- Itâs frustrating there is no landscape orientation on iPad that iâm using with a keyboard and the app forces the portrait mode that iâm not using. This was available in the previous versions but not the new designed one. Please fix it. - Also, things look very magnified and barely fit the screen compared to the previous version design. I hope the developer considers a solution. Thanks!	en	frustrate landscape orientation ipad im use keyboard app force portrait mode im use available previous versions new design one please fix also things look magnify barely fit screen compare previous version design hope developer consider solution thank	Negative	App Store	1	0	0
App Store	c4f2300b-ae19-4086-ab89-e8f2a605bbb6	DooDakie	5/31/23 20:55	Having the best Experienced doing the SAB Online App!				en	sa	sab-mobile	Iâm so happy to be able to do this with SAB Mobile App. because it so convenient and so easy to use for the kind of lifestyle that I have. Great app to be with ð	en	im happy able sab mobile app convenient easy use kind lifestyle great app	Positive	App Store	0	0	0
App Store	c4f0a6a3-9e27-4584-a9b3-657a5556966e	SAA219	3/31/23 14:25	Perfect Application				en	sa	sab-mobile	This application is straight forward and easy to use. It is user-friendly, interactive and customizable to userâs personal needs.	en	application straight forward easy use userfriendly interactive customizable users personal need	Positive	App Store	1	0	0
App Store	e9b1cdc7-3d4a-44ce-92a5-b1340bbd53ad	Aqk 123	3/10/23 22:56	4 star cuz of missing one basic feature				en	sa	sab-mobile	Please allow nick names of beneficiary. Its very difficult to remember when we have multiple accounts or only first last name is displayed for Sabb accounts.	en	please allow nick name beneficiary difficult remember multiple account first last name display sabb account	Negative	App Store	0	1	0
App Store	35f67b78-17e9-47a7-9baf-d896818bdf52	Abu Ashar	4/19/23 13:10	Muhammad Umar				en	sa	sab-mobile	What a friendly use application and services, using since 12 years , Alhamdulillah !! Never disappointed. Would like to say Thanks to Sabb for incredible services	en	friendly use application service use since years alhamdulillah never disappoint would like say thank sabb incredible service	Positive	App Store	0	0	0
App Store	e17373d4-5a71-463b-9bfe-41d539976bd9	Hadi292	2/5/23 19:22	Bugs	{'id': 9449829, 'body': 'Dear SABB Customer, Please update to the latest version of SABBMobile application and try again, If this issue still exists please contact us and attach a screenshot of the problem with your contact information through the below email sabbcustomercare@sabb.com Best Regards, SABB Customer Care Team', 'modified': '2019-07-01T23:35:39Z'}			en	sa	sab-mobile	Great improvement, thanks SABB. 1- need to be faster 2- Face ID not functioning well and should be an option if didnât pass Face ID to select text verification, I get stuck with this.	en	great improvement thank sabb need fast face id function well option didnt pass face id select text verification get stick	Negative	App Store	0	1	0
App Store	c4914370-177a-424e-9ea3-96cd0295a8c4	Mazhi09	11/5/22 20:56	Awesome improvement				en	sa	sab-mobile	Sabb app had less features but they have made major leaps and now I guess they have everything on SABB mobile for customers	en	sabb app less feature make major leap guess everything sabb mobile customers	Positive	App Store	1	0	0
App Store	4f5684e9-c155-4d59-8663-9b2eb389065f	Zhaider.syed	6/29/23 19:39	App freezes while applying for Aqsat				en	sa	sab-mobile	App freezes while applying for Aqsat, while we click proceed to apply for Aqsat app is not going to the next page and it keeps processing .	en	app freeze apply aqsat click proceed apply aqsat app go next page keep process	Negative	App Store	0	0	1
App Store	972710d7-a005-4345-bc78-14b0f45bf00a	sitetrekker	8/3/23 10:19	Gregorian calendar option				en	sa	sab-mobile	This would have been 5 stars if only it has an option for Gregorian calendar when paying dependentâs levy. Nevertheless it still very intuitive.	en	would star option gregorian calendar pay dependents levy nevertheless still intuitive	Positive	App Store	1	1	0
App Store	0f48324f-3d6a-465e-a618-be96402ddb67	B0o0dy	5/29/23 3:04	Feedback				en	sa	sab-mobile	Thanks for making everything better	en	thank make everything good	Positive	App Store	0	0	0
App Store	2952500c-6726-4a58-8fec-849dbb2c9d90	AFAZOZ	4/25/22 1:26	Professional App				en	sa	sab-mobile	One of the best useful apps between all the bank apps with professional ordering for the options that the app gives. All my regards to Saudi British bank developers.	en	one best useful apps bank apps professional order options app give regard saudi british bank developers	Positive	App Store	0	0	0
App Store	10229673-180e-4c25-908c-1c3a15ad4af3	client KAL	2/16/22 12:04	I like the old app design				en	sa	sab-mobile	The new app is a downgrade in-terms of user experience and visual design. The previous app was well designed and we thought in every steps. Yes we used to face few bugs but I was much much happier with the old app. I wish I can leave this bank now .. Even if we accept this design itâs not well implemented. I donât think the app will win an award this year. Definitely not	en	new app downgrade interms user experience visual design previous app well design think every step yes use face bug much much happy old app wish leave bank even accept design well implement dont think app win award year definitely	Negative	App Store	1	0	0
App Store	f537a826-db0b-4fd6-adf9-1e964e87ecd0	Kadhemsa	7/15/23 13:17	The New App for SAB				en	sa	sab-mobile	The new version of SAB mobile is huge improvement compared to previous, nice looks and easy to navigate to different services.	en	new version sab mobile huge improvement compare previous nice look easy navigate different service	Positive	App Store	0	0	0
App Store	c5eeb7f8-9f52-483b-95e2-7ca121be3324	MS JSA	5/28/23 7:30	User friendly				en	sa	sab-mobile	Iâm using SAB app for all my banking transactions and itâs very efficient, easy and user friendly. Keep up the good work and keep improving.	en	im use sab app bank transactions efficient easy user friendly keep good work keep improve	Positive	App Store	0	0	0
App Store	2a88ff9f-92d6-473b-b511-76b51c5f7d98	Riyadh2023	5/17/23 6:31	Secured Banking App and Easy to Use				en	sa	sab-mobile	The menu is well organized for use within secured environment. Online banking is now easy with the latest SAB mobile app	en	menu well organize use within secure environment online bank easy late sab mobile app	Positive	App Store	0	0	0
App Store	3de5813e-c362-4968-82f1-33157885b7c3	xs2farhan	6/19/22 13:17	Works very well				en	sa	sab-mobile	It takes few seconds to complete the transfer/transactions.	en	take second complete transfertransactions	Neutral	App Store	1	0	1
App Store	c1746d15-bf2d-468d-8520-95c5099d7fce	HSK999	9/18/23 7:34	Easy to use				en	sa	sab-mobile	You will have all what you want in one place with easy way to navigate and get things done	en	want one place easy way navigate get things do	Positive	App Store	0	0	0
App Store	cd2f2b83-7ca3-4aa8-b998-15317ac4c424	طرشيحا	2/19/23 19:24	Easy to use and user friendly				en	sa	sab-mobile	Much better than older version	en	much good old version	Positive	App Store	0	0	0
App Store	abfbdd5b-c46a-4269-9d86-8e48e65aad44	Maia0710	11/25/22 23:51	Quick Access				en	sa	sab-mobile	The new features of the Sabb is great. I could see my budgets and expenses. I can manage it and be able to know where I need to scrimp on.	en	new feature sabb great could see budget expense manage able know need scrimp	Positive	App Store	0	1	0
App Store	5336f112-d2b5-4405-ae8c-871bf719bf54	ALLAHANDO	7/11/22 19:54	Please login with face or finger				en	sa	sab-mobile	I am not satisfied with login. Please make it with face or finger Touch. Now is not required for login password. Other banks using Face ID or finger touch. Please update your application.	en	satisfy login please make face finger touch require login password bank use face id finger touch please update application	Negative	App Store	0	1	0
App Store	12917e11-fdf2-43f1-bea5-513d44eebbbc	waseem Asif	3/4/22 19:40	Services and especially transfers				en	sa	sab-mobile	Itâs really great to use mobile service. Itâs much quicker than to web based system	en	really great use mobile service much quick web base system	Positive	App Store	0	0	0
App Store	3e70b05f-5405-44da-94d4-448077f06679	mashaiel	3/31/23 12:22	Annoying update				en	sa	sab-mobile	I love SABB app, itâs very practical. But the fact that i have to register my device (iPhone) every signal time the app gets updated is ANNOYING!!!	en	love sabb app practical fact register device iphone every signal time app get update annoy	Negative	App Store	1	0	0
App Store	8e79915c-5e25-4ece-87ac-04e737df1cec	hany amin	2/28/23 8:07	Good experience				en	sa	sab-mobile	It was amazing experience, all data are available Very smooth and quick action	en	amaze experience data available smooth quick action	Positive	App Store	0	0	0
App Store	4970f445-fa28-4ab2-b0fb-ab8f11d4dcca	Hafiz Ali	12/2/22 12:24	Great App!				en	sa	sab-mobile	Great application which covers most of the functions and personal transactions required, a bit slow though ..	en	great application cover function personal transactions require bite slow though	Positive	App Store	1	0	1
App Store	2834feee-fe14-422e-b901-e183447b8170	#m@t	2/27/23 11:38	Very Helpful App				en	sa	sab-mobile	It has been with me for last 7 years and always helpful for all my bank related activities.	en	last years always helpful bank relate activities	Positive	App Store	1	0	0
App Store	8b8f0f34-8dce-4724-8e7a-c028e4db9a31	FrancisNgwaba	12/28/22 23:35	User friendly and easy navigation.				en	sa	sab-mobile	The new app is user friendly easy to navigate	en	new app user friendly easy navigate	Positive	App Store	0	0	0
App Store	f10a3185-2c0f-42f2-a3f2-144ea60f62d2	mtuff88	6/24/22 22:32	Always imporving				en	sa	sab-mobile	I like the idea that they always add new features to make the experience faster, efficient and easier	en	like idea always add new feature make experience fast efficient easy	Positive	App Store	0	0	0
App Store	f3aa103c-f53e-4a53-96a1-7acca7609997	Oyousuf	7/5/23 8:55	Issue after last update				en	sa	sab-mobile	After last update convert to Aqsat is not working from application, it works fine from web browser. From application it getâs stuck .Need to fix this.	en	last update convert aqsat work application work fine web browser application get stick need fix	Negative	App Store	0	0	1
App Store	4514df5b-9747-49a7-9a34-a8e44077573d	Shameer_Sam	4/7/23 14:15	SAB mobile Application				en	sa	sab-mobile	Is very User friendly and Accurate and keeps on updating on new innovative features	en	user friendly accurate keep update new innovative feature	Positive	App Store	1	0	0
App Store	420ee1c2-2da0-427c-9bff-2d2d0ab5e88e	Jojo_fantastic	12/1/22 13:50	Overall aervice				en	sa	sab-mobile	Its been long time iâve been using sabb services. And itâs fascinating how the banking services evolved and got to his excellence. Overall i am very satisfied and happy ð	en	long time ive use sabb service fascinate bank service evolve get excellence overall satisfy happy	Positive	App Store	1	0	0
App Store	5e0f1d3f-86c9-4090-9c74-1afce6d18d6f	Sacha !!!	9/2/23 7:22	Best bank App in KSA				en	sa	sab-mobile	The recent upgrades with the 360 gives a great capability to plan and monitor all types of transactions, the support through the App is also fantastic.	en	recent upgrade give great capability plan monitor type transactions support app also fantastic	Positive	App Store	0	0	0
App Store	041f3b44-97da-4bfe-b0ee-e8b55798666a	khalma0y	8/23/23 4:08	Great App				en	sa	sab-mobile	The app has improved tremendously and easy to use. All you need is available in the app that you donât need to visit any branch.	en	app improve tremendously easy use need available app dont need visit branch	Positive	App Store	0	0	0
App Store	b2b5da79-b7e7-41bb-9344-055059306e01	mmadibbo	9/18/23 2:07	Great app service but poor relationship manager service e				en	sa	sab-mobile	Thanks for the great app service Need to improve your relationship manager service	en	thank great app service need improve relationship manager service	Positive	App Store	0	0	0
App Store	dda12de1-db50-4e43-8e6d-12f50f68d499	a.adam21212	8/1/23 10:26	Nice and helpful app.				en	sa	sab-mobile	The only complaint that there is a bug that prevents from making the aqsat plan through the app and I have to log on through the laptop	en	complaint bug prevent make aqsat plan app log laptop	Negative	App Store	0	1	0
App Store	5e8f3595-2104-4a99-b3a0-e63a09c52414	nickhallareous	6/2/22 14:58	Update accounts not working				en	sa	sab-mobile	There is canceled credit card is available and active one not available and data of one displayed on another. hope you can solve that	en	cancel credit card available active one available data one display another hope solve	Negative	App Store	0	1	0
App Store	671c96c1-30b7-4a16-97a9-279c8d95cd17	AAShabbir	7/17/22 22:33	Banking at your finger tips that is both practical and aesthetically pleasing				en	sa	sab-mobile	Finally an App that makes sense and reflects commitment to customer service. Works splendidly on iPhone! Good job!	en	finally app make sense reflect commitment customer service work splendidly iphone good job	Positive	App Store	0	0	0
App Store	d8b1c79f-705a-46d3-9432-0db6ea0bd251	pkdrafk	4/3/23 9:54	Rfq				en	sa	sab-mobile	Overall user friendly.. if it could add an option to see the personal loan status and payment schedules will be much better	en	overall user friendly could add option see personal loan status payment schedule much good	Positive	App Store	1	1	0
App Store	4ecce12f-c7ac-444d-85e0-ff7e739c0ce4	Umar Masoud	9/9/22 21:39	It needs improvement				en	sa	sab-mobile	Information update takes a lot of time and of course thereâs always a problem when payment rejected.	en	information update take lot time course theres always problem payment reject	Negative	App Store	0	0	1
App Store	23c93915-8d9e-4072-be57-85b4cdec0925	Daniel 2DMC	6/12/22 14:40	Easy and Fast				en	sa	sab-mobile	All things goes smooth with this application, highly recommended	en	things go smooth application highly recommend	Positive	App Store	0	0	0
App Store	58b12b5b-59c3-453f-8e91-195a8bf9f95d	Wicked-ways	9/5/23 17:29	Very smooth and user friendly				en	sa	sab-mobile	Very smooth and user friendly	en	smooth user friendly	Positive	App Store	0	0	0
App Store	3bd24d6f-a918-4f3d-8c8a-223189a48fec	arifi	7/18/22 15:20	Would be amazing to have tablet version				en	sa	sab-mobile	It would be great option to issue an iPad version of this app, specially most of customers currently replacing their laptop with tablet.	en	would great option issue ipad version app specially customers currently replace laptop tablet	Positive	App Store	0	1	0
App Store	e8eff64f-226b-473a-b8b2-7230bffd2662	ohalim	9/2/23 7:18	Easy to use				en	sa	sab-mobile	Custom interface, almost single page app, useful statistics, etc	en	custom interface almost single page app useful statistics etc	Neutral	App Store	1	0	0
App Store	01603c94-917d-4e1d-8bbd-89ce569b9bc4	Abdullah Amri	3/19/23 23:39	Great online banking platform				en	sa	sab-mobile	Great experience using SABBNET. Very user friendly and responsive, huge improvement compared to the old app.	en	great experience use sabbnet user friendly responsive huge improvement compare old app	Positive	App Store	0	0	0
App Store	4ff147da-6c57-478f-8fc6-07f4302c8192	abusultan263	5/28/22 6:51	Excellent online services				en	sa	sab-mobile	Nothing more that we could ask for	en	nothing could ask	Positive	App Store	0	1	0
App Store	d83a090b-43e6-4a6d-b1f1-6b717acf5d2c	Saad6246	3/31/23 11:16	Very satisfied				en	sa	sab-mobile	Good app all round, covers all services and keeps improving. Best would be to add the SABB points on the same app platform to make it more efficient.	en	good app round cover service keep improve best would add sabb point app platform make efficient	Positive	App Store	0	0	0
App Store	85377463-32bd-448c-b36d-e5079d59682e	shikkar	6/13/22 18:01	Best service				en	sa	sab-mobile	Itâs a wonderful app, we can do all transactions without visiting the bank on mobile and superb service	en	wonderful app transactions without visit bank mobile superb service	Positive	App Store	0	0	0
App Store	43b2b248-d59b-4899-bb67-8d4ab0d8cd07	Tarafeh	5/4/22 8:30	Most user friendly interface				en	sa	sab-mobile	Easy to use, fast and great user experience.	en	easy use fast great user experience	Positive	App Store	0	0	0
App Store	fffd4663-6883-4a26-9a0b-909367a0ef14	حميدعثمان	5/14/23 17:00	SABNET is excellent				en	sa	sab-mobile	SABNET is grate app for managing my expenses and controlling it as per my plans. Itâs very convenient and simple to use, however it very secure fro any attempt of hacking and spammers. I recommend it to all	en	sabnet grate app manage expense control per plan convenient simple use however secure fro attempt hack spammers recommend	Positive	App Store	1	1	0
App Store	e2d9ca3f-f105-4eb8-b898-687ee3284d3f	MHQBhatti	6/25/22 22:00	Options				en	sa	sab-mobile	Great view and access to all banking options	en	great view access bank options	Positive	App Store	0	0	0
App Store	9f58f26c-c5b9-40ff-b2ae-1508a3823ae5	Samoda86	4/17/23 5:46	Excellent				en	sa	sab-mobile	Excellent application and very useful and easier to use than the old version	en	excellent application useful easy use old version	Positive	App Store	0	0	0
App Store	37fefd35-4bd5-46ee-affc-3ff0c56ce117	Lei_42	3/3/23 17:12	Accessible banking wherever & whenever you are.				en	sa	sab-mobile	Accessible banking wherever & whenever you are.	en	accessible bank wherever whenever	Positive	App Store	0	0	0
App Store	f7f144a8-58d9-4c62-bf7c-7157c796ee93	فوزي جابر	5/24/22 12:22	Transfer feature not working				en	sa	sab-mobile	Since 6 hours I have been trying to transfer money to a beneficiary in Alrajhi bank but once I enter the amount and enter submit the app gets freeze	en	since hours try transfer money beneficiary alrajhi bank enter amount enter submit app get freeze	Negative	App Store	0	1	1
App Store	700a9cad-3d7d-4656-a0d1-d4437a5380d1	Sirf_insaan	12/31/22 12:00	Swift UI				en	sa	sab-mobile	App is fast and UI is smooth and easy to navigate. Get work done in minutes for banking needs.	en	app fast ui smooth easy navigate get work do minutes bank need	Positive	App Store	0	0	0
App Store	45de4375-a82a-46ff-833a-89b5885e539e	Syedsaud	6/28/23 9:02	Amazing new look and easy services at mobile app. Love it				en	sa	sab-mobile	Amazing new look and easy services at mobile app. Love it	en	amaze new look easy service mobile app love	Positive	App Store	0	0	0
App Store	05a9e771-2c51-4dc5-8d78-9fcb8ada1dd8	Mohammed Abdul muqtadir	12/7/22 6:41	Mobile App				en	sa	sab-mobile	Superb service with the best mobile interface. Easy to use and saves time	en	superb service best mobile interface easy use save time	Positive	App Store	0	0	0
App Store	e152d552-5ece-4d25-bb56-aa7c568f95b7	ShahRukhMalik	2/20/23 5:03	Unable to launch app				en	sa	sab-mobile	I am unable to launch this app in my iPhone after installation. During login, it gives me option to enable location and then stuck. Even though location is already on but still having the issue. New customer by the way ð	en	unable launch app iphone installation login give option enable location stick even though location already still issue new customer way	Negative	App Store	0	1	1
App Store	f333e3b3-1aba-439f-ab97-d557df1117a4	Abbadi Jasem	12/4/22 17:11	Simple and Fast				en	sa	sab-mobile	It is very simple and fast app, and much better than the old one. Thanks	en	simple fast app much good old one thank	Positive	App Store	0	0	0
App Store	d7692670-4909-49bb-8e69-2a3407846e8d	Tkhan81	8/10/22 18:04	Excellent app very user friendly				en	sa	sab-mobile	Itâs an excellent app with user friendly features and very easy to navigate.	en	excellent app user friendly feature easy navigate	Positive	App Store	0	0	0
App Store	87901ab7-887e-4e6a-8d1d-e75dcbc0b27d	Iyad khan Rashid	5/4/22 3:28	Easy and fast				en	sa	sab-mobile	Better then last ver easy navigation to menus and faster	en	good last v easy navigation menus fast	Positive	App Store	0	0	0
App Store	1a9edc60-34de-4cd6-87b9-ae9b863bbf81	Yazeed_j	5/25/22 23:24	To app support				en	sa	sab-mobile	When I try to transfer money between my accounts, the loading logo appears and stays forever.	en	try transfer money account load logo appear stay forever	Neutral	App Store	0	1	0
App Store	40f9c582-b84a-4b9a-96da-4180ccdad69d	Faz2222	3/28/23 12:47	Great Service				en	sa	sab-mobile	user friendly and has all fiscal services available	en	user friendly fiscal service available	Positive	App Store	0	0	0
App Store	e7f2a9b6-5bd7-4b9f-b7bb-b5e8f47e85de	Rk_junaid	12/27/22 19:43	Great Application				en	sa	sab-mobile	Iâve Experienced a good out come from the bank and with this mobile application	en	ive experience good come bank mobile application	Positive	App Store	0	0	0
App Store	ea590c07-5134-4609-b0b7-a0890f6f66ee	ukhail	5/9/22 5:20	Use of Sabbnet				en	sa	sab-mobile	Greatly enhances overall customer experience with easy to use menu.	en	greatly enhance overall customer experience easy use menu	Positive	App Store	0	0	0
App Store	3c3d9075-9e2d-482a-bc78-b7a97a3ec36f	Lina Bbl	4/10/22 7:46	Usability				en	sa	sab-mobile	App was certainly good and easy to use. But with latest update I can only login with face ID which is broken on my phone. I think this is highly unusable and should be fixed asap.	en	app certainly good easy use late update login face id break phone think highly unusable fix asap	Negative	App Store	1	1	0
App Store	987ff95d-8e34-433b-aa24-361e4a426bf4	Hassan Adolai	9/1/23 20:36	Application				en	sa	sab-mobile	Easy to use and can access all needed data	en	easy use access need data	Positive	App Store	0	0	0
App Store	34b7cc37-8a35-4ecb-8495-9f409b067184	FavasHasna	8/6/23 16:02	Service				en	sa	sab-mobile	Easy to work and fast service	en	easy work fast service	Positive	App Store	0	0	0
App Store	1934d172-9679-4d6f-9b54-b8951b2d280e	kuttyssssss	8/6/23 8:43	Great assistance				en	sa	sab-mobile	SABB online app always giving immense pleasure and it is best online bank app I ever had used which giving a rocket speedy response.	en	sabb online app always give immense pleasure best online bank app ever use give rocket speedy response	Positive	App Store	0	0	0
App Store	27ae7e3a-d5ba-46f6-8ddc-2a7e2063183f	Electronic friend	2/25/23 11:40	Fast and convenient				en	sa	sab-mobile	One of the best banking app. One stop shop for all banking needs Keep it up the great work	en	one best bank app one stop shop bank need keep great work	Positive	App Store	0	0	0
App Store	d4804bd4-39f9-4fcc-96dc-ab51528cfe41	Abazio	1/9/23 10:28	Perfect and always updated				en	sa	sab-mobile	Perfect banking application and always updated	en	perfect bank application always update	Positive	App Store	1	0	0
App Store	eb1e260b-13d5-437e-8df1-1ddb1e584850	Jafar Qasim	12/5/22 11:17	Superb experience!				en	sa	sab-mobile	Totally in love with the application. With every new update the response time and accessibility becomes better	en	totally love application every new update response time accessibility become good	Positive	App Store	0	0	0
App Store	906078c1-7472-44ce-91d5-b89ec704464f	flytiger_rtz	8/22/22 6:24	Useful app				en	sa	sab-mobile	Have all banking features you need within reach	en	bank feature need within reach	Positive	App Store	1	0	0
App Store	82528928-4c85-4746-abb4-769475bdf5d0	M Rinas	7/29/22 13:26	Transfer to local bank instantly 24/7				en	sa	sab-mobile	This is fantastic update (Transfer to local bank instantly 24/7) ðð¼ðð¼ðð¼ Thank You SABB	en	fantastic update transfer local bank instantly thank sabb	Positive	App Store	0	0	0
App Store	7abb52ab-6000-445a-987c-1c08edf9226e	Sallu412	8/23/23 5:22	Sab Bank Online Service				en	sa	sab-mobile	I am really happy to use Sab banking service online. Its very easy and friendly.	en	really happy use sab bank service online easy friendly	Positive	App Store	0	0	0
App Store	84f904ae-d162-436d-9e75-c4252f164f7f	akku ashkar	4/28/23 10:21	User friendly				en	sa	sab-mobile	Best app in Ksa , 24 Hours have support and no bugs, one thing need to improve #Roaming	en	best app ksa hours support bug one thing need improve roam	Positive	App Store	0	1	0
App Store	0b98cd11-3449-4d38-bcec-6e05c11ac6cf	Syed_Khaja	7/12/22 7:22	One place for all services				en	sa	sab-mobile	Well developed app with features for all the needed services in a short time. Thanks to SABB team.	en	well develop app feature need service short time thank sabb team	Positive	App Store	1	0	1
App Store	95d74667-5fec-467c-88bc-d4281f01be26	Mnazzal1	9/19/23 10:31	Thanks for this high level program				en	sa	sab-mobile	A great service and application	en	great service application	Positive	App Store	0	0	0
App Store	232865b4-a0bb-444c-bf37-de2ff5957021	Rawad zaki	3/28/23 8:39	Amazing app				en	sa	sab-mobile	Everything is smooth and clear	en	everything smooth clear	Positive	App Store	0	0	0
App Store	8541be5e-a037-43b8-a973-282c3a1ee4af	Dodiii78	3/24/23 21:02	Easy of use				en	sa	sab-mobile	Fully satisfied with easy of use experience	en	fully satisfy easy use experience	Positive	App Store	0	0	0
App Store	5999f49e-2bef-472a-90db-db9b5b84e109	Bahaa Nabhan	6/8/22 8:44	Perfect now				en	sa	sab-mobile	After the last update	en	last update	Neutral	App Store	0	1	0
App Store	c7ccfb35-ed2d-4a3b-b990-38a732394f7f	Kh.h.si	2/18/22 7:31	Awesome!				en	sa	sab-mobile	Way better, and easier to navigate. Thank you for the update	en	way good easy navigate thank update	Positive	App Store	0	0	0
App Store	736e4e4d-b0fa-422c-9298-ee6a18f66195	anikhamz	12/15/22 4:16	Good Platform				en	sa	sab-mobile	Love the new update, the overall interface is good. The security checks are top notch to protect the customer. Thanks.	en	love new update overall interface good security check top notch protect customer thank	Positive	App Store	0	0	0
App Store	1874390a-8eec-4f59-a8cf-ac2f257e0ad4	بندر بن طلال	12/27/22 9:35	Exactly experience				en	sa	sab-mobile	The most easy and friendly App	en	easy friendly app	Positive	App Store	0	0	0
App Store	82ae1dae-2d35-4886-b5ef-5bc23100e820	jhh Bc cgg	9/5/22 8:05	iPhone 6S Plus	{'id': 25926533, 'body': 'Dear SABB Customer, Please update to the latest version of SABBMobile application and try again, If this issue still exists please contact us and attach a screenshot of the problem with your contact information through the below email sabbcustomercare@sabb.com Best Regards, SABB Customer Care Team\r\n\r\n\r\n\r\n', 'modified': '2021-10-27T12:36:47Z'}			en	sa	sab-mobile	The app is not working properly with IPhone 6s Plus after the last update.	en	app work properly iphone plus last update	Negative	App Store	0	1	0
App Store	5b54def4-8f3b-4cdc-b0f8-a7bcb3d7a322	CnnMureed	11/12/22 6:07	Bill not founds on recent update				en	sa	sab-mobile	Sabb Team, after recent update Iâm not able to find the bill which Iâve added earlier, i used to pay that bills for my personal uses but with the recent update what just has happened?? Kindly resolve the issue as soon as possible	en	sabb team recent update im able find bill ive add early use pay bill personal use recent update happen kindly resolve issue soon possible	Negative	App Store	0	1	0
App Store	5093e889-8ee7-4c69-b524-c6f625ff9551	MutazDS	9/4/23 8:30	Best banking app of all time				en	sa	sab-mobile	User friendly with continuous improvement	en	user friendly continuous improvement	Positive	App Store	0	0	0
App Store	02ad3aea-2cbc-483a-9715-7fa46f5132ec	Jmg🇮🇹	8/16/22 8:18	User friendly				en	sa	sab-mobile	Very easy to use banking application	en	easy use bank application	Positive	App Store	0	0	0
App Store	b3467cb9-a789-4e03-b4d1-82e726fdbce1	Fugro1	6/19/22 21:49	Best Application User Friendly				en	sa	sab-mobile	Best application easy to use , all govt and private payment facilities available.	en	best application easy use govt private payment facilities available	Positive	App Store	0	0	0
App Store	70f189ba-4b12-4df5-a484-80077a7157f4	bxcgsjbdvsjajdvbddbd	6/7/22 20:40	Make your life easy				en	sa	sab-mobile	Excellent app. Continuous development and improvement. easy to navigate. One problem with the live chat. Keep disconnecting.	en	excellent app continuous development improvement easy navigate one problem live chat keep disconnect	Positive	App Store	1	0	0
App Store	dc96183b-85b0-4e7c-bbb7-2e3e9ea6245a	ShaarkAj	9/8/23 2:10	Excellent				en	sa	sab-mobile	I really enjoyed with SABB mobile I need credit card if possible u will be provide me	en	really enjoy sabb mobile need credit card possible u provide	Positive	App Store	0	0	0
App Store	aa6de198-383d-4ac7-b73e-a7db05a0c690	Syed_Tariq	8/14/22 13:51	Amazing App				en	sa	sab-mobile	Such an easy and detailed app for each and everything	en	easy detail app everything	Positive	App Store	0	0	0
App Store	b10dd1bc-7bfb-4378-a888-22a6ace72759	Julie966	5/24/22 18:12	Easy				en	sa	sab-mobile	Online banking made easier	en	online bank make easy	Positive	App Store	0	0	0
App Store	1a9cf79d-995a-42f4-a9ea-79de17898249	Ai992	5/17/22 13:28	Excellent update				en	sa	sab-mobile	App performance has improved, Iâve noticed how responsive the app is.	en	app performance improve ive notice responsive app	Positive	App Store	0	0	0
App Store	b17e18d6-2813-492b-bb74-528f4ff197ef	caranzo	8/29/23 18:13	Very user friendly				en	sa	sab-mobile	So easy to access and use.	en	easy access use	Positive	App Store	0	0	0
App Store	5f77f468-aa88-44fa-a12b-6bfcf4a892b0	thorragroup	4/30/23 9:41	Great service				en	sa	sab-mobile	Great service help to manage paying bills without any efforts.	en	great service help manage pay bill without efforts	Positive	App Store	1	0	0
App Store	e4fb704f-2bfd-496e-89c5-ef5d90069784	Samview	2/20/23 12:43	New update is great				en	sa	sab-mobile	Powerful features, fast, and user-friendly.	en	powerful feature fast userfriendly	Positive	App Store	0	0	0
App Store	bf24bb9a-ba86-413d-8039-1ca78ae364a7	Shehabfrk	11/28/22 10:12	Brilliant				en	sa	sab-mobile	Wonderful service, stable connection, easy way. All at your seat.	en	wonderful service stable connection easy way seat	Positive	App Store	0	0	0
App Store	e033e731-1ae0-4c8e-b44d-c4449ee0610c	ahaneya	2/26/22 20:35	Great App				en	sa	sab-mobile	With the last update finally I can call this a modern mobile banking app	en	last update finally call modern mobile bank app	Positive	App Store	0	1	0
App Store	85c6d677-1d2a-4b4d-8bb3-d7b768deebf5	ArkBupa	5/16/22 19:13	Good UI				en	sa	sab-mobile	User friendly interface, however there is room for enhancements.	en	user friendly interface however room enhancements	Positive	App Store	1	0	0
App Store	4d410b01-ebd7-4ff3-b94c-f53954491d9f	assimbaig	9/7/23 17:46	Please add more options in mobile app				en	sa	sab-mobile	Please add more options in mobile aap	en	please add options mobile aap	Neutral	App Store	0	1	0
App Store	e96d826c-8d23-453b-8326-52f6a8f2d8f9	kaly cool1	9/6/23 17:21	Great				en	sa	sab-mobile	Smooth app with great accessibility to extra features and functions	en	smooth app great accessibility extra feature function	Positive	App Store	0	0	0
App Store	d1feab9a-e6cf-4443-893e-831197ab0dc7	Amat Victoria	8/8/23 6:20	Great Experience				en	sa	sab-mobile	This app is extremely user friendly and efficient. Saves time!! Thanks SAB	en	app extremely user friendly efficient save time thank sab	Positive	App Store	0	0	0
App Store	7fe00a38-9b78-4560-9bae-cf9e6d6f53ff	shhwhwu	9/3/23 10:37	One star missed for lagging and password revealing				en	sa	sab-mobile	Only one star missed for system lagging and password appearing while typing	en	one star miss system lag password appear type	Negative	App Store	0	1	0
App Store	d9232b7c-68ec-433d-a972-acb708a5543c	Abu Mustafa KSA	6/19/23 8:24	Abu Mustafa				en	sa	sab-mobile	I always enjoyed SAB Services as they are giving the best services and assistance to their valuable customers all the time	en	always enjoy sab service give best service assistance valuable customers time	Positive	App Store	0	0	0
App Store	0c35acf4-a5ab-4415-b353-4d1dc1782671	Mangompia	12/30/22 20:44	Easy and convenience 💚👏👏				en	sa	sab-mobile	One of the best bank in entire Kingdom and the very best when it comes to Services ðððð	en	one best bank entire kingdom best come service	Positive	App Store	0	0	0
App Store	5402bb03-0a18-43a9-abbf-286ef5ca9cfc	Ajaskhan	9/3/22 9:29	Easy to use				en	sa	sab-mobile	Nice Application to use and saving time for Ll kind of transactions.	en	nice application use save time kind transactions	Positive	App Store	0	1	0
App Store	260d5740-fc2c-4835-9eec-5b5461af53ae	RaufZohaib	4/20/22 22:03	Excellent App - User Friendly				en	sa	sab-mobile	User friendly app with all the functions	en	user friendly app function	Positive	App Store	0	0	0
App Store	5d20fa31-37d9-4038-b5bf-c9bf5c82e741	Imran Hindi	3/19/23 9:52	Simply nice App				en	sa	sab-mobile	User friendly windows and ease to make any transactions and explore all products of SABB.	en	user friendly windows ease make transactions explore products sabb	Positive	App Store	0	0	0
App Store	64fc8f37-1868-4ed8-90f5-dcec81279a39	Afsal_Ali	2/8/22 6:45	Good Application				en	sa	sab-mobile	Very easy to access everything	en	easy access everything	Positive	App Store	0	0	0
App Store	f27bf73e-57f9-4510-a613-3cdde701e392	Itz__me__nawaas	7/13/23 14:48	SABB user				en	sa	sab-mobile	Hi Please include a logout button in main page / dashboard. It would be helpful to logout immediately. Thank you	en	hi please include logout button main page dashboard would helpful logout immediately thank	Neutral	App Store	0	1	0
App Store	920d3ad2-cc75-4f46-a805-158cedd52d5d	$uper$tar76	5/27/23 22:13	Great app				en	sa	sab-mobile	Great app, efficient and user friendly...besides we need to facilitate and afford loans process and acceptance assessment for loyal customers.	en	great app efficient user friendlybesides need facilitate afford loan process acceptance assessment loyal customers	Positive	App Store	1	0	0
App Store	e3749498-8372-4cf0-b616-7b3434f7120c	Shaikh S@@b	5/20/23 5:45	App Review				en	sa	sab-mobile	Yes the app is fantastic and very user friendly. Its one of the easiest internet banking apps, I have used.	en	yes app fantastic user friendly one easy internet bank apps use	Positive	App Store	0	0	0
App Store	d48fd69d-5f78-4005-9b04-d16fa8ae5e8f	Chuks SA	3/27/23 8:56	Great app. Easy to use				en	sa	sab-mobile	I have had this app for a while and watched it evolve. It is effective and fast. Thank you SABB!	en	app watch evolve effective fast thank sabb	Positive	App Store	0	0	0
App Store	595ebe3a-b99b-4b3f-8c68-bad50acc82aa	Oneluv01	1/21/23 10:44	Better than ever				en	sa	sab-mobile	Gettin better from time to another	en	gettin good time another	Positive	App Store	0	0	0
App Store	2c3dc663-9bdb-422a-9f14-6ee80ce273cb	Awan2020	12/23/22 1:34	Excellent service.				en	sa	sab-mobile	Quite user friendly. Mobile banking at its best.	en	quite user friendly mobile bank best	Positive	App Store	0	0	0
App Store	463048bc-11fd-4b27-aded-6eea7a54e107	bal:D	11/25/22 23:02	Poor mobile app performance				en	sa	sab-mobile	Guys hear me out! I love the bank but absolutely hate the app! You really need to invest in your app development team. The app is extremely slow to load, to operate, and has a lot of bugs. 1 star reviewed.	en	guy hear love bank absolutely hate app really need invest app development team app extremely slow load operate lot bug star review	Negative	App Store	1	1	1
App Store	e8467a7e-ef23-41bd-972d-aef332539a7d	Haidar Alghareeb	10/12/22 6:58	Register phone issue				en	sa	sab-mobile	I cant log in to my account. Every time i log, i am forced to register my phone, when they call me to confirm the registration, error message appears try again later. It has been days and i am unable to use the stupid app	en	cant log account every time log force register phone call confirm registration error message appear try late days unable use stupid app	Negative	App Store	0	1	0
App Store	f169c9dd-6817-4aca-8e64-edd05dcc2389	VIP875	9/17/23 6:42	Fantastic				en	sa	sab-mobile	Fast, Easy and smooth application to use	en	fast easy smooth application use	Positive	App Store	0	0	0
App Store	06aa24b3-c5ce-49e6-9c8d-1d612710891a	habbbbbbb i	7/4/23 9:23	SABB mobile is the best				en	sa	sab-mobile	SABB mobile is an excellent application as I can do all my transactions through it. I love it. Thanks ð	en	sabb mobile excellent application transactions love thank	Positive	App Store	0	0	0
App Store	f40acdcc-8e6a-4aef-ba1c-8b9bdc9d64b0	Azmaths'	7/24/23 12:20	Transfer money confirmation Not available				en	sa	sab-mobile	Their is not confirmation message while we transferring money either local transfer or international transfer. Need to update status by status. Transfer pending Delivered by Sms or email confirmation	en	confirmation message transfer money either local transfer international transfer need update status status transfer pending deliver sms email confirmation	Neutral	App Store	0	1	0
App Store	7b36425e-ed39-44bf-97bb-b2e2d737b501	amusbah	6/21/23 5:38	Easy to use				en	sa	sab-mobile	Easy to use with very safe transactions	en	easy use safe transactions	Positive	App Store	0	0	0
App Store	791e5836-c667-478f-812c-4c75e6023c6b	iftekharuddin Khan	5/3/23 16:09	Response is very fast				en	sa	sab-mobile	The application response is very good and up to the mark	en	application response good mark	Positive	App Store	0	0	0
App Store	8bdfecba-27ee-4939-af44-8919eba7a6ef	Karlgabvince	5/1/23 2:12	Using Sabb mobile				en	sa	sab-mobile	Its a user friendly application	en	user friendly application	Positive	App Store	0	0	0
App Store	5918c2a1-61ec-4757-b821-0075e1be3d91	N. Labbad	4/29/23 11:06	Very practical and easy professioned				en	sa	sab-mobile	Easy to use Secure and displays data clearly	en	easy use secure display data clearly	Positive	App Store	0	0	0
App Store	10b42562-5c67-4477-b45a-9509d42141d6	moh saud	9/15/22 6:09	Good job				en	sa	sab-mobile	I like to work and finish my transaction from the app. Thank you	en	like work finish transaction app thank	Positive	App Store	0	1	0
App Store	6d64f737-5c51-43c6-87dc-6cfd94136786	fadel7789	4/25/23 10:12	Bad customer service				en	sa	sab-mobile	Chat is horrible doesnât scroll down when you chat. They hang up on you because they know nothing will come back to them since there is no KPI in place. App authentication is over complicated. Im oversea and agents are not helpful at all and careless.	en	chat horrible doesnt scroll chat hang know nothing come back since kpi place app authentication complicate im oversea agents helpful careless	Negative	App Store	1	1	1
App Store	308d804e-dc9c-48d8-ad9a-642944b18340	Ali AlHabdan	9/4/22 6:09	Good				en	sa	sab-mobile	Still need more development to include other activity	en	still need development include activity	Neutral	App Store	1	0	0
App Store	6c28835d-1465-4a00-bedc-08bdac11d21f	mhmad alame	11/23/22 12:29	happy				en	sa	sab-mobile	but need to solve one bug when use credit card by app to pay its alawys return back to credit again even if will return to home page then open new credit it will open old one	en	need solve one bug use credit card app pay alawys return back credit even return home page open new credit open old one	Neutral	App Store	0	1	0
App Store	3e5e6847-015e-4085-bb44-e27d97979ac1	Abu Ruaa	9/11/22 20:04	The application is fantastic				en	sa	sab-mobile	Thank you for all the new great features	en	thank new great feature	Positive	App Store	0	0	0
App Store	f5872598-cb05-48fd-be8c-193cf7347877	Ali Al Dahan	3/14/22 22:56	4looy				en	sa	sab-mobile	It is very useful application for so many thing, and its easy to use	en	useful application many thing easy use	Positive	App Store	0	0	0
App Store	3a98daa3-4cf0-4fff-ad7c-ff3b58a8195a	ابو أولادي	5/19/22 22:35	Frauds Can’t be Resolved!!!				en	sa	sab-mobile	Many times I talk to the bank reps. and they never help in that issue! What should I do? Keep my money in my house!!!	en	many time talk bank reps never help issue keep money house	Negative	App Store	0	1	0
App Store	d30daa58-d6f0-4bb9-a537-6b4e478b068d	Dj Cokie	8/1/23 15:47	Very nice and simple to use				en	sa	sab-mobile	Itâs very important to me like Iâm working at far from City	en	important like im work far city	Positive	App Store	0	0	0
App Store	58e7eb30-dbd5-4b08-a624-f7724dec0514	k4r1m4613	6/19/23 7:50	Easy to use				en	sa	sab-mobile	The Application excellent and easy to use	en	application excellent easy use	Positive	App Store	0	0	0
App Store	1a3e6283-76ec-4d38-a7ab-45fcf702f03d	aldinepascual	6/1/22 10:53	Sabb New application				en	sa	sab-mobile	Efficient and user friendly bank application	en	efficient user friendly bank application	Positive	App Store	0	0	0
App Store	4da2a266-db5d-42c1-8161-3991f8a6d1be	Mish3lonah	11/10/22 10:49	The Latest Update Is Not Workin				en	sa	sab-mobile	The App is hung or not moving-on after it asks you to activate your location.	en	app hang movingon ask activate location	Neutral	App Store	0	0	1
App Store	1e81c0af-82c8-47e1-9292-f1eb31106bb4	Sassj55	9/1/22 15:05	SABB App				en	sa	sab-mobile	very easy to use and all customers services available excellent thanks.	en	easy use customers service available excellent thank	Positive	App Store	0	0	0
App Store	3bf7bfbf-d6aa-44cb-91ce-07a36e04fa24	Drad2000	5/17/22 10:01	Excellent app				en	sa	sab-mobile	It was easy and full functionality	en	easy full functionality	Positive	App Store	0	0	0
App Store	5b0ec2ab-b227-4e02-a0fe-019d9414364b	Cooooooooooiiins	2/15/22 6:36	New update ruined the app				en	sa	sab-mobile	The newest update is slow and the UI looks and feels outdated. Why change the design and performance of the app when it was working smooth, fast, and looks modern	en	new update slow ui look feel outdated change design performance app work smooth fast look modern	Negative	App Store	1	0	1
App Store	0780ea9a-ad38-4f05-94f4-faf8ce18bb2f	melhem.ac	9/17/23 19:40	Easy and simple				en	sa	sab-mobile	Thank Sab mobile for this simple and easy App	en	thank sab mobile simple easy app	Positive	App Store	0	0	0
App Store	2490355b-eb17-4dc8-b6dd-d080ddc265cb	umhassansaleh	2/27/23 9:03	Best banking App				en	sa	sab-mobile	Compared to more than 2 other banking apps. This by far was the best	en	compare bank apps far best	Positive	App Store	0	0	0
App Store	da945346-0040-452e-a0a2-a2e8cc91226c	Zubayr6977	11/22/22 6:45	User friendly				en	sa	sab-mobile	Loved the new app. Its very user friendly	en	love new app user friendly	Positive	App Store	0	0	0
App Store	c53e71b4-983b-4360-adcd-cc18ed031397	hamdanmcdar	8/19/22 4:09	Good work guys				en	sa	sab-mobile	Best wishes for bright future for all young guys even though SBB already considered me dead no thanks for that	en	best wish bright future young guy even though sbb already consider dead thank	Positive	App Store	1	0	0
App Store	bdd4ee3f-5aa2-4cb0-9e49-0c25aec11168	N3503	7/15/23 8:03	Excellent app				en	sa	sab-mobile	Excellent mobile banking application easy to use	en	excellent mobile bank application easy use	Positive	App Store	0	0	0
App Store	71b134cb-c8ad-4ee0-98f1-34463d4fd682	nursebim	3/27/23 2:42	Sabb review				en	sa	sab-mobile	Informative, user friendly and easy to use	en	informative user friendly easy use	Positive	App Store	0	0	0
App Store	98ff1a8a-7599-4f15-982b-9165b8614fcc	Best for new learner	3/1/23 15:25	Great service				en	sa	sab-mobile	App is very much user friendly	en	app much user friendly	Positive	App Store	0	0	0
App Store	a783c404-bc55-4f66-8e46-d143e6d5063f	u r taken	12/23/22 17:35	International transfer				en	sa	sab-mobile	Great option to transfer money international	en	great option transfer money international	Positive	App Store	1	0	0
App Store	bbabb4bf-c325-4efe-a183-50c139ca30c7	Bashneen	12/15/22 10:50	Great service!				en	sa	sab-mobile	Loving the prompt and easy services provided. Thank you!	en	love prompt easy service provide thank	Positive	App Store	0	0	0
App Store	14f0ec01-bd2b-4b4e-8d9e-fbf85a218a54	R1968sa	9/3/22 19:24	Very friendly				en	sa	sab-mobile	Thank you very much	en	thank much	Positive	App Store	0	0	0
App Store	60264be8-3f96-4664-af75-b81b2bfbfe90	AGFARHAN	9/1/22 5:53	Updates				en	sa	sab-mobile	Latest updates are great, very easy to use. Farhan	en	late update great easy use farhan	Positive	App Store	0	0	0
App Store	9e505b87-b716-49c6-9269-002d84a18714	M Khairy	6/27/22 16:19	Mobile banking at its best				en	sa	sab-mobile	Great UX/UI and functionalities that makes banking on the move much easier.	en	great uxui functionalities make bank move much easy	Positive	App Store	1	0	0
App Store	298b36cc-af7f-4886-83eb-eeb68c11c84c	ArifChalkoo	5/11/22 10:43	Excellent Interface				en	sa	sab-mobile	Best interface that one can enjoy.	en	best interface one enjoy	Positive	App Store	0	0	0
App Store	23eb0d70-06b4-448c-8e9e-c91838d1965d	fatma ghafly	9/3/23 5:43	Thank you				en	sa	sab-mobile	Excellent web banking services .	en	excellent web bank service	Positive	App Store	0	0	0
App Store	194c0242-0ee9-4c13-b4e3-3fd34b9b7da2	MoDiToO	6/19/23 17:13	Loving the app				en	sa	sab-mobile	Easy and friendly I love the 360 degree view. Just amazing and value adding	en	easy friendly love degree view amaze value add	Positive	App Store	0	0	0
App Store	5816be8f-6b96-4a84-9fcb-54266ec22ca0	SiXeN027	4/18/23 12:12	Sab Bank				en	sa	sab-mobile	Very Easy to use also to Pay my Bills on time . Guaranteed the Best Bank . ð«¡	en	easy use also pay bill time guarantee best bank	Positive	App Store	0	0	0
App Store	99495fd6-970e-42a7-9b5f-b531a90cfaf0	ABDELHALIM AFIFI	3/31/23 10:14	Awesome App				en	sa	sab-mobile	Swift access, easy features not complicated, Simply perfect and happy to use	en	swift access easy feature complicate simply perfect happy use	Positive	App Store	1	1	0
App Store	5d7818cf-690b-41be-8372-f44d43653dc7	mmamh	3/26/23 21:51	Face ID crash	{'id': 9449683, 'body': 'Dear SABB Customerو\nPlease update to the latest version of SABBMobile application and try again, If this issue still exists please contact us and attach a screenshot of the problem with your contact information through the below email sabbcustomercare@sabb.com \n\nBest Regards, \nSABB Customer Care Team', 'modified': '2019-07-01T23:16:55Z'}			en	sa	sab-mobile	Face ID crashed unable to reactivate Slow Lot bugs	en	face id crash unable reactivate slow lot bug	Negative	App Store	0	1	1
App Store	b4619e44-3e53-471b-9d14-76339adea93e	ضياأء	1/25/23 7:14	The best app				en	sa	sab-mobile	Sabb are special from other bank for online services ðð»ðð»	en	sabb special bank online service	Neutral	App Store	0	1	0
App Store	9b0300ea-0eca-4978-86ed-341fd09ec651	amj966	12/11/22 17:03	Well developed and thanks for listening to end-users				en	sa	sab-mobile	One of the best developing banking apps.	en	one best develop bank apps	Positive	App Store	0	0	0
App Store	3e8b55f5-b217-4e6e-beff-4dfa78615913	M Zok	11/20/22 6:04	Muhieddine zok				en	sa	sab-mobile	Great improvement month over a month. Well done	en	great improvement month month well do	Positive	App Store	0	0	0
App Store	8532588e-feb4-4057-b0a2-ccd822743b60	irshad8791	11/14/22 9:08	Easy to use				en	sa	sab-mobile	Very good app and user friendly with all safe and secure.	en	good app user friendly safe secure	Positive	App Store	0	0	0
App Store	22e180e4-6595-41bc-bf78-a5e9a0e0607e	MolarAce	5/23/22 5:06	Nice application				en	sa	sab-mobile	I liked the new SABB mobile app itâs elegant and combines everything needed things in a single pane of glass.	en	like new sabb mobile app elegant combine everything need things single pane glass	Positive	App Store	1	0	0
App Store	1ab6e8e2-244a-403d-9fcf-d64c9f234b4e	Imraniqbaal	6/8/22 18:25	Great app but little bit slow UI				en	sa	sab-mobile	UI processing takes time. It can be faster	en	ui process take time fast	Neutral	App Store	0	0	1
App Store	5541c0fb-8132-4f12-9dab-90545e34e73c	Albaqer	5/17/22 20:13	Easy application				en	sa	sab-mobile	Easy to use application	en	easy use application	Positive	App Store	0	0	0
App Store	5d5de08c-2d37-4203-8103-7a3c61b9dd4e	joyj7777	6/16/23 14:35	Terrible				en	sa	sab-mobile	If you have a transaction dispute, you have to wait 30 days to complaint or get money back . Why I should wait for 30 days ? Itâs hard earned money and you should help the people who trust and do banking with you .	en	transaction dispute wait days complaint get money back wait days hard earn money help people trust bank	Negative	App Store	1	0	0
App Store	76b13215-5b96-4991-bf80-a0f7cf20c2e7	Jlaksana	6/26/23 7:02	Best Mbanking				en	sa	sab-mobile	SABB Mbanking is very convenient, real time and quick process for and every transaction.	en	sabb mbanking convenient real time quick process every transaction	Positive	App Store	0	0	0
App Store	43814e9e-1094-42e3-ab94-3cd73bd051ce	ambernn	5/6/23 20:21	Great experience				en	sa	sab-mobile	Excellent display n other new and easy handling	en	excellent display n new easy handle	Positive	App Store	0	0	0
App Store	f911ef63-08f5-4a44-8d05-2092f22f9511	IHAnsari	9/24/22 21:11	Ease of use				en	sa	sab-mobile	SABB app is a wonderful experience every time you use it.	en	sabb app wonderful experience every time use	Positive	App Store	0	0	0
App Store	d8938bb1-ee17-44ce-a056-f38859c0abcd	Abdul Wahd Khan	5/19/22 10:55	Excellent job 👍				en	sa	sab-mobile	Keep up the great service and maintain the same. My good wishes with the entire SABB team. ð¤	en	keep great service maintain good wish entire sabb team	Positive	App Store	0	0	0
App Store	a5e760d1-cde3-4035-ac94-d4974fc0e3e9	Dost Yar	4/20/22 19:46	Overall one of the best				en	sa	sab-mobile	Some times OTP doesnât received.	en	time otp doesnt receive	Neutral	App Store	0	1	0
App Store	d97eb336-850a-45ec-a94c-a3b35df6c6a3	omardelkhan	6/27/23 11:28	Easy to use				en	sa	sab-mobile	The SAB mobile app is easy to use in all aspects!	en	sab mobile app easy use aspects	Positive	App Store	0	0	0
App Store	9e4c354a-9502-4c42-9bb1-583b035e9c44	jawedg	1/30/23 18:12	Excellent				en	sa	sab-mobile	It is very easy and quick .	en	easy quick	Positive	App Store	0	0	0
App Store	13836ed6-5392-42d9-8169-4fe8e6a92740	Abdulk7	12/30/22 20:28	SABB bank application				en	sa	sab-mobile	Excellent application with all needed features, good bank services.	en	excellent application need feature good bank service	Positive	App Store	0	0	0
App Store	01aff505-88c5-4823-9a67-5527c04dc7c7	Dragonslayer666	9/7/22 11:24	A very user friendly app				en	sa	sab-mobile	Amazing app in my opinion the 360 feature very convenient	en	amaze app opinion feature convenient	Positive	App Store	0	0	0
App Store	0682f8ff-95d3-4c90-81b8-00f0fe4eea65	nh Hassan	7/30/22 13:12	Service almost nice				en	sa	sab-mobile	Their costumers service was nice and staff as well as. They need to provide better remittances rate as like other banks.	en	costumers service nice staff well need provide good remittances rate like bank	Positive	App Store	0	0	0
App Store	0101db80-6599-4912-aaf4-3933592f4fc7	wryuioidhk GA day njg	6/4/22 12:18	Excellent performance				en	sa	sab-mobile	Easy to use and always helpfull	en	easy use always helpfull	Positive	App Store	0	0	0
App Store	7ae04b4b-cbbc-44f5-9f95-ae8842c5e9a9	SpyGlamour	5/23/22 9:45	Best of the best				en	sa	sab-mobile	The best online banking, all the services I need I can reach within a tap ð¤©	en	best online bank service need reach within tap	Positive	App Store	0	0	0
App Store	5e845a00-9649-4146-a6c4-347574799eeb	MEmara	2/26/23 4:18	The best banking platform				en	sa	sab-mobile	Really impressive, easy, fast & reliable Good luck	en	really impressive easy fast reliable good luck	Positive	App Store	0	0	0
App Store	f8043936-166d-475e-9bef-9fbfe35e7cf8	CM Khobar	7/14/22 17:25	C M				en	sa	sab-mobile	Great app. Works very well and makes it easy to manage my account.	en	great app work well make easy manage account	Positive	App Store	0	0	0
App Store	0a2f27c1-4502-4faa-a87b-33f35505ac4f	Romantek 55	9/6/23 8:27	Update KYC				en	sa	sab-mobile	If you need to update the KYC you must login Sabb website to do it and not support by APP and the app	en	need update kyc must login sabb website support app app	Neutral	App Store	0	1	0
App Store	722c4f38-9bb7-4383-b98c-500998e74b0c	جعفر صليل	8/16/23 14:42	SAB Mobile				en	sa	sab-mobile	The application is very friendly and satisfactory.	en	application friendly satisfactory	Positive	App Store	0	0	0
App Store	cdff3f7f-d7a3-44b2-92d7-ad3b2b2d495e	MrNoanswer	8/21/23 18:34	Banking at your fingertips				en	sa	sab-mobile	Good app Little bit slow	en	good app little bite slow	Positive	App Store	1	0	1
App Store	7eb71f0e-54c0-4ee9-8b92-2da998a43f11	Abbas.90	5/13/23 13:59	Easy app				en	sa	sab-mobile	Smart and easy banking application	en	smart easy bank application	Positive	App Store	0	0	0
App Store	1ca457e8-2024-4ba8-9766-59f9ae791859	Zaheer Mohd	12/9/22 15:34	Zaheer Mohammed				en	sa	sab-mobile	User Friendly, Fast and Easy to access..	en	user friendly fast easy access	Positive	App Store	0	0	0
App Store	8c715066-53ce-425e-8386-713ae973ab60	B.R.H.9.3	10/29/22 6:35	Still need to use laptop				en	sa	sab-mobile	The app provide updates on a monthly basis and still you need to use laptop to redeem ICSABB points.	en	app provide update monthly basis still need use laptop redeem icsabb point	Neutral	App Store	0	1	0
App Store	70dfcc4e-1522-4879-a86c-7c895dfa8b0b	waqasaziz	6/7/23 16:53	Waqas Aziz				en	sa	sab-mobile	Quite friendly and very easy to do transaction	en	quite friendly easy transaction	Positive	App Store	0	0	0
App Store	bcc2af74-d662-4ed0-b617-27c034364df4	غنى &غدي	2/26/23 10:31	Easy life				en	sa	sab-mobile	Very useful and practical solution for me	en	useful practical solution	Positive	App Store	0	0	0
App Store	77b11437-5de8-4d4d-a434-7d58526843a4	Arcspace14	3/26/23 0:50	Friendly use				en	sa	sab-mobile	Nice and friendly use	en	nice friendly use	Positive	App Store	0	0	0
App Store	6b5802bc-6395-481e-82b8-0d4ef7ecb3d3	sha12345623	3/18/23 12:09	Awesome				en	sa	sab-mobile	Itâs awesome services very glad with transaction rates. Thank you for making banking easier.	en	awesome service glad transaction rat thank make bank easy	Positive	App Store	0	0	0
App Store	59e56c22-6357-432c-a0a4-023527b9ffa5	oe Hiiiii eks	10/19/22 15:00	Especially wondering				en	sa	sab-mobile	Vary easy to handle normal people	en	vary easy handle normal people	Neutral	App Store	0	0	0
App Store	d31e4ce9-75fd-4fcc-8732-91ce3e2f3bc3	So7ail Malik	6/5/22 5:10	Good service				en	sa	sab-mobile	Thanks for good care of your customers	en	thank good care customers	Positive	App Store	0	0	0
App Store	d4a52309-2730-4db1-ac44-d246958d39ce	rkhalil10	3/22/22 7:41	SABB App				en	sa	sab-mobile	It is slow because maybe of the animation part.	en	slow maybe animation part	Negative	App Store	0	0	1
App Store	ba202f1b-2e9b-40c1-bcfd-c76eb0c0821b	mishal 900000000000	6/29/23 15:30	I like it ⭐️⭐️⭐️⭐️⭐️👍				en	sa	sab-mobile	Itâs so strong and more flexibility I like this bank and I recommend it â­ï¸â­ï¸â­ï¸â­ï¸â­ï¸ðð	en	strong flexibility like bank recommend	Positive	App Store	0	0	0
App Store	c75d131f-4e36-4ecd-b137-839392b5de5c	TALAL AL MABROUK	5/3/23 7:23	Nice App.				en	sa	sab-mobile	Itâs a wonderful app I wish you all the best. And really a nice step up.	en	wonderful app wish best really nice step	Positive	App Store	0	0	0
App Store	52b82bbd-9917-40bd-921c-1065d8665991	waleedkhalid996	6/9/23 8:54	App not optimised for iPhone 14 Pro				en	sa	sab-mobile	Its been over 9 months since the iPhone 14 Pro and 14 Pro Max were released and this app is still not optimised for Dynamic Island and the texts on the top borders cut off or is not accessible easily.	en	months since iphone pro pro max release app still optimise dynamic island texts top border cut accessible easily	Negative	App Store	0	1	0
App Store	6faa88dc-1f31-4124-bdb4-9eaace0fbd12	N!ada	3/22/23 4:23	Thank you				en	sa	sab-mobile	Easy and fast	en	easy fast	Positive	App Store	0	0	0
App Store	e0fbbddf-a098-49a1-bd70-ef46aa1e6c78	hhkjki	6/3/22 14:14	Ahmed hameed				en	sa	sab-mobile	Amazing services am a member since almost 10 years	en	amaze service member since almost years	Positive	App Store	0	0	0
App Store	df0807a8-8ebf-4683-a1b7-1de989c1f51c	Kashif Shakoor	2/24/22 8:28	New version not working with iPhone 6s Plus				en	sa	sab-mobile	When ever trying to go on transfer sabb beneficiary after entering amount screen not show button for transfer only show cross to go back main screen	en	ever try go transfer sabb beneficiary enter amount screen show button transfer show cross go back main screen	Neutral	App Store	0	1	0
App Store	cc9d0822-90ff-4bd6-9001-9e2bc0308347	Akramulhaque	8/3/23 10:53	Good service				en	sa	sab-mobile	Quick & comfortable	en	quick comfortable	Neutral	App Store	0	0	0
App Store	e8ba2722-2064-4a44-8665-0b44c33084cd	mahagrani	9/2/23 9:53	Amazing App				en	sa	sab-mobile	It is really simple and very convienient Very well designed to solve all the problems Tow thumbs up ð	en	really simple convienient well design solve problems tow thumb	Positive	App Store	1	0	1
App Store	33663fc0-5c8b-4967-ba1b-7ce7697bed60	Hbabgi	6/1/23 18:23	Nice application				en	sa	sab-mobile	Nice any easy to use application for all transactions	en	nice easy use application transactions	Positive	App Store	0	0	0
App Store	26b022a1-207b-4ed6-bc04-0272c139e3e1	Abo Omer	4/17/23 7:51	Fabulous				en	sa	sab-mobile	Wonderful update, useful and practical. The application is one of the best.	en	wonderful update useful practical application one best	Positive	App Store	0	0	0
App Store	3f0831b3-eda5-4d43-ab46-bfad96686eeb	mohammed1000000	4/27/23 8:52	The worst app i have ever used in my life				en	sa	sab-mobile	Your bank app is so weak. Always freezing, always asking for update. Everytime i try to use the app, i got the message âthe service is not available right nowâ	en	bank app weak always freeze always ask update everytime try use app get message service available right	Negative	App Store	1	0	1
App Store	d0ad8dfb-2d4d-4537-8c9f-acd8a101672a	KJ Grg	3/29/23 4:06	Privacy				en	sa	sab-mobile	Very secure, user friendly and great performance.	en	secure user friendly great performance	Positive	App Store	0	0	0
App Store	1c6c9294-642d-4cfb-9aca-f76ef1b7e2af	Mr. Footy	7/17/22 16:08	Need improvement. You can do better				en	sa	sab-mobile	Very simple and easy to use.	ar	simple easy use	Positive	App Store	0	0	0
App Store	2a673ef9-ff6f-4c6c-bb79-feb58a13d9dc	Javed_5884	6/24/22 13:39	SABB mobile App				en	sa	sab-mobile	One of the best mobile app, very user friendly.	en	one best mobile app user friendly	Positive	App Store	0	0	0
App Store	80bbe7cd-9900-44ca-bf07-9edaca22f3a4	Bakier	6/20/22 0:30	I'm in love with it				en	sa	sab-mobile	Every upgraded is an extreme advancement. Really the developers are doing a great job.	en	every upgrade extreme advancement really developers great job	Positive	App Store	0	0	0
App Store	eb6bfafc-a605-4ccd-9aad-4bf962a738e8	Hiksmero	6/1/22 5:12	Best Banking App				en	sa	sab-mobile	The new 360 budget and expense is amazing This app is easy to use and the interface is amazing	en	new budget expense amaze app easy use interface amaze	Positive	App Store	1	0	0
App Store	3bccbe6e-9c3b-437f-8368-4529cb84ab35	saudi-expat	2/23/22 18:35	System and app is garbage				en	sa	sab-mobile	Cannot login and I called customer service to fix the issue i follow multiple solution from but until now the still not recognized my account. Bad service and garbage app	en	login call customer service fix issue follow multiple solution still recognize account bad service garbage app	Negative	App Store	1	1	0
App Store	2cd4f300-b533-42fc-b2e6-80bc89b3c4b0	S.Abbaxi	5/22/23 9:33	Customer satisfaction				en	sa	sab-mobile	Iâm fully satisfied and enjoying SAB online Banking	en	im fully satisfy enjoy sab online bank	Positive	App Store	0	0	0
App Store	cc972044-bd23-4eac-b56e-dd8b0a383f8e	Khan waheed63674	5/31/23 7:39	Good				en	sa	sab-mobile	Very friendly to use	en	friendly use	Positive	App Store	0	0	0
App Store	9babe2fb-022d-4f4b-85ab-6d7b9f59c4a4	Asdtms	4/10/22 2:08	Mr bindarsoni				en	sa	sab-mobile	The app asked for mandatory update , yet the update is not working ?? The back round colours are not helping and making it hard to see / read	en	app ask mandatory update yet update work back round colour help make hard see read	Negative	App Store	0	1	0
App Store	403dd2ac-9fad-4bb6-985b-a89408d07eda	f.zahrn	8/5/23 22:35	Complete options				en	sa	sab-mobile	I really find it very effective app.	en	really find effective app	Positive	App Store	0	0	0
App Store	affa5d5a-59fb-422d-bcc9-fc8fdb345d0f	Abu faadil	3/29/23 0:20	It’s easy and great				en	sa	sab-mobile	Thank for your response	en	thank response	Positive	App Store	0	0	0
App Store	6a12844c-e1eb-4f22-aced-c703513ce1c9	zjjaiajiakkqmqai	4/19/22 8:24	Good				en	sa	sab-mobile	International Bank rate compared to other banks are little low. Otherwise all good	en	international bank rate compare bank little low otherwise good	Neutral	App Store	1	0	0
App Store	e93c07a1-4b2a-4c33-ae6a-41afe9ed91f8	hussam321	8/16/23 9:52	Great app				en	sa	sab-mobile	New interface is great, but requires more notification about the bills, IPO, traffic fines and due amounts	en	new interface great require notification bill ipo traffic fin due amount	Neutral	App Store	1	1	0
App Store	a09d4982-85eb-4cf1-a35f-a0f53f74dab7	Imran jatt PAK	3/6/23 20:40	Best Banking service I use saab banking service since 2013 best service				en	sa	sab-mobile	Best banking service ever.	en	best bank service ever	Positive	App Store	0	0	0
App Store	c51e7734-3257-40da-a3aa-ffc2ffcd6208	Miro318	12/6/22 12:23	Great mobile app. User friendly				en	sa	sab-mobile	Excellent app. Among all banking app.	en	excellent app among bank app	Positive	App Store	0	0	0
App Store	b976c64b-05d9-4839-80db-ec015429a273	hydarali kaippally	3/6/23 8:02	International transfer				en	sa	sab-mobile	The money sending always a little late otherwise are OK	en	money send always little late otherwise ok	Neutral	App Store	1	0	1
App Store	4256a781-a03f-40e3-b0cf-f6158dfeeefe	InzyD	12/2/22 3:01	Better than before ⭐️⭐️⭐️⭐️				en	sa	sab-mobile	Good speed without delay	en	good speed without delay	Positive	App Store	1	0	1
App Store	46821809-3d5c-4d10-a685-b09cb94f0cf7	Sobhialghazzawi	7/19/22 16:03	Why you pul out the portfolio				en	sa	sab-mobile	Their is always a problem in opening the web sight	en	always problem open web sight	Negative	App Store	0	1	0
App Store	1c5a1345-6e8e-4a10-9bde-52995cea692a	Usama Zaky	2/28/22 4:37	.				en	sa	sab-mobile	The app services are good but the previous design was much better than the existing one	en	app service good previous design much good exist one	Positive	App Store	1	0	0
App Store	4aa0816b-5643-4294-8547-22d86e0d3100	Hadeer1977	3/30/23 12:22	Hadeer1977				en	sa	sab-mobile	Thank you for the excellent service	en	thank excellent service	Positive	App Store	0	0	0
App Store	f0f2cbe1-82d4-4046-af83-02bcf566d563	Radomiha	12/3/22 8:57	Good application				en	sa	sab-mobile	You need to activate fast log in	en	need activate fast log	Neutral	App Store	0	0	0
App Store	c029424b-347f-4fb1-a959-d18aae7cee1b	ahmed mat	2/26/23 17:55	Great features				en	sa	sab-mobile	The app is easy to use and features are wide.	en	app easy use feature wide	Positive	App Store	0	0	0
App Store	2f6fb0aa-49cb-47ce-b8d0-3e93b8147f81	Jazeel Johnson	2/6/23 10:45	Heberian				en	sa	sab-mobile	Easy to Use. If transfer charge is less it will be Great banking at most !	en	easy use transfer charge less great bank	Positive	App Store	1	0	0
App Store	57f029f6-f7ce-433c-9aa4-70a3a318277f	AliAlghanin1	5/14/22 17:56	Ali Alghanim				en	sa	sab-mobile	Comparing with others banks, I would score SABB mobile as one of the best application	en	compare others bank would score sabb mobile one best application	Positive	App Store	0	0	0
App Store	d888ce35-7344-4320-81da-42d0c0f5fbd2	Nicemus	3/18/22 22:11	Great experience				en	sa	sab-mobile	Very nice app compare to other local banks	en	nice app compare local bank	Positive	App Store	0	0	0
App Store	ec356a17-cfd9-4117-807a-2dbf1df635ca	ALMOSAFFER	6/24/23 21:06	friendly use				en	sa	sab-mobile	this version of the application is easy to use and very helpful in getting my financial activities done in short time...	en	version application easy use helpful get financial activities do short time	Positive	App Store	1	0	1
App Store	82c69fa5-fffd-46ac-9dad-262f6e7c8ccf	Fadi Mantash	2/9/23 18:39	Love the Ux				en	sa	sab-mobile	Excellent application. Extremely user friendly.	en	excellent application extremely user friendly	Positive	App Store	0	0	0
App Store	ab9be9d5-571f-44aa-96af-e08900fe606a	narsnejrj	7/20/22 23:09	Awesome👌				en	sa	sab-mobile	Fast and user friendly.	en	fast user friendly	Positive	App Store	0	0	0
App Store	326d5425-816b-4136-86ad-b88abfa4f678	Learner2	7/4/22 22:04	Worth a try				en	sa	sab-mobile	Practical	en	practical	Neutral	App Store	0	0	0
App Store	0df48dfa-1ca5-488e-a263-d87f3ca1f902	noufeequ	6/27/22 13:01	Mobail service				en	sa	sab-mobile	Excellent service keep it up SAB bank	en	excellent service keep sab bank	Positive	App Store	0	0	0
App Store	f348a7cf-b162-463b-a6c5-d7f62cf72ad0	Dheepak Shankar	6/7/22 3:57	Excellent app				en	sa	sab-mobile	Easy to use with nice Home Screen	en	easy use nice home screen	Positive	App Store	0	0	0
App Store	4d4edf6b-0f4e-4555-952a-7a9fd9509aa5	saoudisx	5/29/22 9:15	Great SABB app				en	sa	sab-mobile	I like this app itâs so user friendly and fast banking solution.	en	like app user friendly fast bank solution	Positive	App Store	0	0	0
App Store	58d01780-8a46-45bd-8c60-0a468fe890e8	Fahim Alvi	3/3/22 16:19	Muhammad Faheem				en	sa	sab-mobile	Great experience with state of the art online banking features	en	great experience state art online bank feature	Positive	App Store	0	0	0
App Store	2cc30c8e-d7a1-4d76-bab6-ba75b5f3ef70	GORKHE420	9/5/23 4:59	Bring transfer sadad number				en	sa	sab-mobile	Good aap but now cancel sadad payment ð¥ºð¥º	en	good aap cancel sadad payment	Negative	App Store	0	1	0
App Store	8870143f-ce62-414e-a44d-63c4486a8ce2	Belalzohdy	8/29/23 10:54	Very good				en	sa	sab-mobile	After updating now the app is good	en	update app good	Positive	App Store	0	0	0
App Store	49de53cf-b968-4a9b-a94b-279478e4d86c	azizmulhim	8/27/23 11:07	Saab application				en	sa	sab-mobile	Best of all , easy to use, very informative.	en	best easy use informative	Positive	App Store	0	0	0
App Store	a48990da-d75d-4d85-8388-66bd9276a2e1	badieh shehab	7/26/23 23:22	Excellent				en	sa	sab-mobile	Very easy to use with lots of facilities	en	easy use lot facilities	Positive	App Store	0	0	0
App Store	d827a837-35ee-4af5-ad50-14cdc5d0599e	Ahmed Hassan 86	6/27/23 5:19	Ahmed				en	sa	sab-mobile	Best bank Application with smooth use.	en	best bank application smooth use	Positive	App Store	0	0	0
App Store	7f2ab429-5ee6-4177-9154-8c4b44fee239	Kikhateeb	6/21/23 21:28	Khaled				en	sa	sab-mobile	You can do everything in this app. Thanks SAB	en	everything app thank sab	Positive	App Store	0	0	0
App Store	1a34a694-857c-4c1e-b58d-20c28c980590	AAbuimad	6/3/23 20:39	Lock out button not working				en	sa	sab-mobile	Main screen lock out not working in IPhone	en	main screen lock work iphone	Negative	App Store	0	1	0
App Store	c615adf7-7d87-4d75-86e1-55804c891291	Humaikani	4/28/23 14:16	Easy				en	sa	sab-mobile	It is really simple to use, no complications at all! Kudos SAB team	en	really simple use complications kudos sab team	Positive	App Store	1	0	0
App Store	52b383cf-05d2-4760-9886-be089e4b14ef	تحسن	4/13/23 11:54	Very fast				en	sa	sab-mobile	New performance	en	new performance	Neutral	App Store	0	1	0
App Store	120becbc-95f8-42a4-b8a0-9a8fe6f8a555	Abd-jasm	11/25/22 16:12	Excellent App friendly use				en	sa	sab-mobile	Excellent App friendly use. Thanks SABB	en	excellent app friendly use thank sabb	Positive	App Store	0	0	0
App Store	77cb304c-fa57-4c85-8a93-9ca3e275ee92	naeembmw	9/27/22 22:47	Great application				en	sa	sab-mobile	Very easy to use	en	easy use	Positive	App Store	0	0	0
App Store	faa00007-0c2e-44ef-9404-ffe8dbb994de	mhzahri	6/11/22 20:17	Always updating				en	sa	sab-mobile	Why there is always app updateâ¦ I hope this is not to fix continues security issues Plz replay	en	always app update hope fix continue security issue plz replay	Negative	App Store	0	1	0
App Store	af8b59ee-bcc5-4b35-8299-f458cd1ac172	Hajer almuhajer	8/27/23 17:47	Thanks for ALAWWAL SAB				en	sa	sab-mobile	Easy and fast payments to pull if services and banking process	en	easy fast payments pull service bank process	Positive	App Store	1	0	0
App Store	1d758fb1-8012-4d6a-a339-0089368aff32	mabbbyrulz	9/17/23 18:01	Nice interactive App				en	sa	sab-mobile	It covers all my daily expenses, transfers etc best bank application so farâ¦	en	cover daily expense transfer etc best bank application far	Positive	App Store	0	0	0
App Store	2e2e3af6-c04d-4268-bd15-281881ea01a0	mohd.ibrahim77	6/2/23 3:09	Excellent				en	sa	sab-mobile	Excellent SABB, you can do any transaction for any where ð	en	excellent sabb transaction	Positive	App Store	0	0	0
App Store	2554cf50-6ac1-4c52-8cce-7f5d6e3a6494	Varikkodan M. Ashraf	6/7/23 17:57	Easy and fastness!				en	sa	sab-mobile	SAB app has become more handy and easy to use now.	en	sab app become handy easy use	Positive	App Store	0	0	0
App Store	c8542e28-bbfd-4fe3-a576-fbf5bad4ff06	Wassim reviews	4/18/23 17:13	Progress				en	sa	sab-mobile	Easy & safe	en	easy safe	Positive	App Store	0	0	0
App Store	22b18ce1-a46d-4660-aa20-1f7e955163c7	advisor mohammed	2/27/23 10:28	Easy use				en	sa	sab-mobile	Thanks for easy app. Easy use	en	thank easy app easy use	Positive	App Store	0	0	0
App Store	3a33f751-58f4-407b-8551-d9d84a019156	Sameh Helal	11/30/22 17:45	Transfer to GCC account				en	sa	sab-mobile	Very easy and fast	en	easy fast	Positive	App Store	0	0	0
App Store	95fcda0c-e2d4-4ca1-808a-2ed62ad5b979	Alnufaily	8/21/23 2:11	Ahmed Alnufaily				en	sa	sab-mobile	Fast process and clear steps	en	fast process clear step	Positive	App Store	0	0	0
App Store	fa2f2755-689b-4264-a444-83ba54885000	Nohj01	6/6/22 19:24	Too much delay on credit of remittance				en	sa	sab-mobile	You guys keep on improving the application but maybe you can improve as well the acceptable time to credit the remittance to the recipient, unlike other banks!!!	en	guy keep improve application maybe improve well acceptable time credit remittance recipient unlike bank	Neutral	App Store	1	0	0
App Store	3b9f8cd7-f6b8-4ae9-ad58-828e6b4304af	Islam Malek	2/17/22 17:45	Worst update ever				en	sa	sab-mobile	I cannot make transfer through the app I send a message in the app with no reply/response, i just make a complaint that i cannot transfer my money with new update	en	make transfer app send message app replyresponse make complaint transfer money new update	Negative	App Store	0	1	0
App Store	66d2c106-e60f-42b7-839c-10e5299dda33	Amri_190	8/17/23 21:24	Good Service				en	sa	sab-mobile	Very helpful service.	en	helpful service	Positive	App Store	0	0	0
App Store	6df3c899-46c6-481e-9d91-9aed343ee5d7	oa231	5/28/23 10:59	Great app				en	sa	sab-mobile	Wide flexibility, options and fast execution	en	wide flexibility options fast execution	Positive	App Store	0	0	0
App Store	4b3e5fc1-4129-460a-8920-ded484de36a4	Abu Hussain Naji	5/3/23 12:55	Transaction is OK, calling customer service’s need yo look at it, waiting time is so long				en	sa	sab-mobile	Transaction is OK, calling customer serviceâs need yo look at it, waiting time is so long	en	transaction ok call customer service need yo look wait time long	Negative	App Store	1	0	1
App Store	7cc2a46e-3510-4064-a8f4-4551d1fb2a06	Ali48Malik	12/20/22 8:05	Excellent Application				en	sa	sab-mobile	Easy to Use and error free	en	easy use error free	Positive	App Store	0	0	0
App Store	a989eab5-e112-491f-9f8d-83858547728c	Curing the rope	12/10/22 21:20	Great App				en	sa	sab-mobile	Very intuitive easy to use	en	intuitive easy use	Positive	App Store	0	0	0
App Store	9660f1a2-047a-4544-aa77-70955d89ce6c	Isbah Majid	9/2/22 13:27	Excellent Apps				en	sa	sab-mobile	Very much appreciated for such tools provided by this Apps	en	much appreciate tool provide apps	Positive	App Store	0	0	0
App Store	ce4fcd48-08e3-42d6-b5ff-f1b6195b40b7	Issa Qureshi	11/23/22 12:02	International Transferring				en	sa	sab-mobile	During transaction currency exchange for other countries should be shown	en	transaction currency exchange countries show	Neutral	App Store	0	1	0
App Store	fd3bbebb-ecc4-4814-81a5-59144bd8b7fe	ahmed ghhhhhhhhhh	10/12/22 5:41	Great experience				en	sa	sab-mobile	Most of my operations through this app	en	operations app	Neutral	App Store	0	1	0
App Store	40d9ff09-9d58-497d-a451-d3c24191348e	aamirnasim	6/29/22 17:29	Great App				en	sa	sab-mobile	All my banking activity made easy Thanks	en	bank activity make easy thank	Positive	App Store	0	0	0
App Store	1e54c4a6-fcd5-4f19-a260-0c0a8de055c9	Matar, A M	8/9/22 6:10	New SABB good				en	sa	sab-mobile	Much better than previous one Very easy to use	en	much good previous one easy use	Positive	App Store	1	0	0
App Store	4b1b385f-205c-4e18-b1c5-746e515c33e2	Abusa66am	6/6/23 0:06	Wow				en	sa	sab-mobile	Amazing and easy online services	en	amaze easy online service	Positive	App Store	0	0	0
App Store	3fbf9e08-a991-454d-bde6-324b35e23ce7	FarhanUsmanGhani	4/11/23 23:19	Farhan				en	sa	sab-mobile	Best bank mobile app ever used	en	best bank mobile app ever use	Positive	App Store	0	0	0
App Store	c0ec4adf-cc15-43cc-86c0-5908c2038427	knsyed	6/1/22 7:07	The new version is awesome				en	sa	sab-mobile	The speed and outlays are great, keep it going dears	en	speed outlays great keep go dears	Positive	App Store	0	0	0
App Store	2403efe3-1e4b-4d88-bb30-dbfdfbc04842	3bdullah009	7/26/23 9:23	Best Bank App ever				en	sa	sab-mobile	The provided services, the ease to use.. just perfect ðð½	en	provide service ease use perfect	Positive	App Store	0	0	0
App Store	57e881f1-f786-43ac-aad6-78c6157046b4	Maan112211	9/20/23 14:06	Good				en	sa	sab-mobile	Easy and user friendly	en	easy user friendly	Positive	App Store	0	0	0
App Store	b3e7432d-e00f-4fb5-a452-cf36039a8104	M. Hanfare	6/8/23 5:39	Good experience				en	sa	sab-mobile	More efficient	en	efficient	Neutral	App Store	0	0	0
App Store	cf218945-eb79-461d-8263-67bff5211162	Mvinj	4/27/23 0:27	Miss Thandeka Mvinjelwa				en	sa	sab-mobile	System is easy and highly secured	en	system easy highly secure	Positive	App Store	0	0	0
App Store	dd353788-1cc0-44ce-917f-60631374f7c9	thansim	4/3/23 10:52	Good performance				en	sa	sab-mobile	Updated	en	update	Neutral	App Store	0	1	0
App Store	39ee4528-032d-441a-b01c-65e5768c23a6	kila8888	3/27/23 15:44	Love it, so friendly				en	sa	sab-mobile	Love it, so friendly	en	love friendly	Positive	App Store	0	0	0
App Store	38e61c7e-86e0-494d-a058-3808bcc92240	Abu naiel	1/7/23 14:36	no way to login	{'id': 34224068, 'body': "Dear SABB Customer, We're very sorry to hear about your experience! Could you please contact us through the below email : sabbcustomercare@sabb.com and Kindly attach a screenshot of the issue with your contact information. \n\nSABB Customer Care Team", 'modified': '2023-01-11T11:27:48Z'}			en	sa	sab-mobile	the app was working smoothly but this update makes it very difficult and canât login any moreð you have to give very quick feedback and solution	en	app work smoothly update make difficult cant login give quick feedback solution	Negative	App Store	1	1	0
App Store	1d1d8a23-2d38-4875-afb9-6574f57522e7	jamjes	8/6/22 13:45	Excellent App				en	sa	sab-mobile	Very nice to use.. user friendly	en	nice use user friendly	Positive	App Store	0	0	0
App Store	f80b1bea-48ca-40fb-b795-bd50e284c878	chota zahid	6/18/22 13:44	Nice people nice service				en	sa	sab-mobile	You are just a great	en	great	Positive	App Store	0	0	0
App Store	05fbf0bd-a687-43e5-b2a6-6a7178d11787	Mmaghm	6/5/22 20:55	Thanks				en	sa	sab-mobile	Good and easy app to use and safe	en	good easy app use safe	Positive	App Store	0	0	0
App Store	86007632-5e2c-4551-9ee6-9a92b5b930a2	michaelsaeed	4/20/22 6:29	Easy App				en	sa	sab-mobile	very nice App easy to handle , well done	en	nice app easy handle well do	Positive	App Store	0	0	0
App Store	deb67c96-4a81-4a9c-9e0c-dc33d01d970f	Sha3boo6	6/20/23 16:30	Transfer				en	sa	sab-mobile	Simple procedure	en	simple procedure	Neutral	App Store	1	0	0
App Store	70f58e96-9cd3-47bc-a09e-fccc94e8561a	💃🕺 Mo3tasem	11/27/22 5:58	Recommend				en	sa	sab-mobile	App is easy to monitor and administrate â¤ï¸â¤ï¸	en	app easy monitor administrate	Positive	App Store	0	0	0
App Store	17450c4e-7f12-4b7a-8a5c-b4efa4a96c8d	Rayuelapol	9/3/22 9:10	Great App				en	sa	sab-mobile	Fantastic app, useful, makes life easier !!	en	fantastic app useful make life easy	Positive	App Store	0	0	0
App Store	e61a1bb5-a053-48af-bdb5-58b74882ae1f	z@Sabb	8/28/22 6:13	Sabb mobile app is just perfect				en	sa	sab-mobile	The best newcomer is the 360 just amazing ð Thank you Sabb	en	best newcomer amaze thank sabb	Positive	App Store	0	0	0
App Store	550b398d-fe43-4f35-9679-c411373862c2	WH.2HH	8/27/22 11:08	Good				en	sa	sab-mobile	This app is a perfect and useful app for personal services . Thank you. WH	en	app perfect useful app personal service thank wh	Positive	App Store	0	0	0
App Store	93d4d0e2-59a5-41d3-bc9c-460e3237b44f	tipu amir	9/5/22 8:37	Good service				en	sa	sab-mobile	I really enjoy	en	really enjoy	Positive	App Store	0	0	0
App Store	a7d56b3b-26a6-4b29-a545-520526be4a2a	Usman448	12/23/22 4:00	Download new version issue				en	sa	sab-mobile	Not downloading new version right now.	en	download new version right	Neutral	App Store	0	1	0
App Store	b6331211-1115-4f0f-b60b-d5636328f566	najjuammu	6/2/22 6:17	Xlnt				en	sa	sab-mobile	very user friendly	en	user friendly	Positive	App Store	0	0	0
App Store	ba4fe4ba-36ab-4dfb-a70b-7419b4755e44	Yasmeen82	5/22/22 20:04	Good service				en	sa	sab-mobile	Great thank you. Good service	en	great thank good service	Positive	App Store	0	0	0
App Store	74cf2618-ad67-497d-993a-9dd165496540	Mik082	4/7/22 14:08	Sabb application superb				en	sa	sab-mobile	Sabb new apps are more useful and friendly	en	sabb new apps useful friendly	Positive	App Store	0	0	0
App Store	db60ebed-0bef-4e6c-af4e-4165672cbc59	Anoor12345678	4/24/22 1:54	App not working				en	sa	sab-mobile	After logging the app is asking my to update my account information and data and itâs already updated	en	log app ask update account information data already update	Neutral	App Store	0	1	0
App Store	ba7800c1-4d0a-447c-a359-f6612966de7a	Mahmed40103773	8/28/23 2:07	Excellent platform				en	sa	sab-mobile	Amazing platform with great features and accessibility Thanks SAB	en	amaze platform great feature accessibility thank sab	Positive	App Store	0	0	0
App Store	1b91814d-2cf7-4c08-9749-29d7f838bf3b	Raja 987789	9/3/23 4:25	App is not working good				en	sa	sab-mobile	It takes too long to open the app and sometimes automatically stops working	en	take long open app sometimes automatically stop work	Negative	App Store	0	1	1
App Store	a5f493e6-7545-4212-8e2f-f764dd679a86	CA Shaaz	4/3/23 11:05	Best Bank Mobile App				en	sa	sab-mobile	SABB banks app is by the far the best bank app I have ever seen	en	sabb bank app far best bank app ever see	Positive	App Store	0	0	0
App Store	892b4e9a-2053-406f-acd4-a6d5c7a7af8e	farooq muntaz	3/7/23 14:53	Thanks good service				en	sa	sab-mobile	Thanks good service	en	thank good service	Positive	App Store	0	0	0
App Store	58bdceb0-888f-44f5-940e-fe314cae69c0	Yasser2020	8/20/22 21:31	Excellent update				en	sa	sab-mobile	Thanks for the update	en	thank update	Positive	App Store	0	0	0
App Store	26395c83-5b39-4dfd-afb9-7b24a870855e	Saleh gaber	12/1/22 12:33	Great Experience				en	sa	sab-mobile	I had a great experience	en	great experience	Positive	App Store	0	0	0
App Store	0294d26f-37e6-46ae-8460-361fd466fac1	iltafmughal	8/9/22 12:16	Best Banking App				en	sa	sab-mobile	Best and data banking app . Really appreciated to all team .	en	best data bank app really appreciate team	Positive	App Store	0	0	0
App Store	ce02d223-f9e1-4de2-84fa-e4fb574c7f65	Waill Al Sayegh	6/16/22 2:08	App malfunction				en	sa	sab-mobile	Dear developers It appears when ever I try to make a transaction the app signâs me out automatically especially when Iâm trying to make a money transfer Please Advise	en	dear developers appear ever try make transaction app sign automatically especially im try make money transfer please advise	Negative	App Store	0	1	0
App Store	2fb511ce-03d1-4948-8b0b-57f205585d64	AlRabou	8/3/23 16:13	Good				en	sa	sab-mobile	My favorite bank	en	favorite bank	Positive	App Store	0	0	0
App Store	86cee839-1cb0-4c15-bdb4-6fd307017d25	Yasser Moaty	7/15/23 23:59	Yasser Moaty				en	sa	sab-mobile	Very easy and responsive loved the new update !	en	easy responsive love new update	Positive	App Store	0	0	0
App Store	991d74e1-3065-435a-ac73-7fc15839d21e	Samsamxyz	7/25/23 19:05	Best bank				en	sa	sab-mobile	Easy to use and manage .	en	easy use manage	Positive	App Store	0	0	0
App Store	2c2a404d-be23-4fb7-8907-4bdbc8e677a2	Mequiades	3/26/23 14:24	best banking experience				en	sa	sab-mobile	very efficient and convenient banking thru SABB	en	efficient convenient bank thru sabb	Positive	App Store	0	0	0
App Store	869ffdc1-e0cc-4c5d-a678-442aef10a9bb	lakim safwan	6/8/23 5:55	User friendly				en	sa	sab-mobile	Best app so far	en	best app far	Positive	App Store	0	0	0
App Store	e94f5c06-8a3a-463d-b84d-a79f85808616	Sam*84	4/25/23 7:01	Feedback				en	sa	sab-mobile	Worse app ever. Not reliable.. does not work most of the time â¦ big failure .. it needs major enhancements to safe the customer journey experience	en	bad app ever reliable work time big failure need major enhancements safe customer journey experience	Negative	App Store	1	1	0
App Store	aca53561-03fe-461e-a2f7-78dc7911fdb2	angelesjosef	5/31/22 8:13	Very secured and easy to use!				en	sa	sab-mobile	Very secured and easy to use!	en	secure easy use	Positive	App Store	0	0	0
App Store	fed50f2e-bfa0-46d5-975f-83a2bd0a6313	Saaad fahad	3/3/23 8:34	Service				en	sa	sab-mobile	Service is bad	en	service bad	Negative	App Store	1	0	0
App Store	c29ff584-b850-4b7a-b418-68fed9780533	Ksubaie	12/23/22 17:38	Excellent app				en	sa	sab-mobile	Thank you for the excellent application	en	thank excellent application	Positive	App Store	0	0	0
App Store	a73d4428-4d84-4691-8288-131a41834ca5	yasser shaheen	12/1/22 7:48	Amazing and easy				en	sa	sab-mobile	Amazing and easy	en	amaze easy	Positive	App Store	0	0	0
App Store	85dd3e2c-38c8-42a3-8c81-31bdd9151dc6	abomub	9/28/22 14:36	The best friend				en	sa	sab-mobile	Since 1990 Sabb is my best place and my favorite. Good luck	en	since sabb best place favorite good luck	Positive	App Store	0	0	0
App Store	a1fa8228-ce58-45e7-920f-15c279a78c0e	Shameemshaikh	8/24/22 17:56	Best Bank App				en	sa	sab-mobile	Ease of use and strict control	en	ease use strict control	Neutral	App Store	1	0	0
App Store	6a1ac99a-5477-4928-ba9e-f6384dd01553	Moe_atm	6/25/22 20:20	New update every week!				en	sa	sab-mobile	Itâs really frustrating a lot of updates, the last one has SABB 360 I guess itâs called, with the latest update I think itâs gone	en	really frustrate lot update last one sabb guess call late update think go	Negative	App Store	1	0	0
App Store	4a18b522-c1e5-4c89-9084-d380d5f25e3b	Oussma64	7/25/23 8:04	Great App				en	sa	sab-mobile	All what I need to do is there, thanks. Great App	en	need thank great app	Positive	App Store	0	0	0
App Store	1385839b-9b38-4fdd-849f-70ac27c6bd59	@innocent_asif	2/12/23 6:33	Best Online Banking App				en	sa	sab-mobile	Very fast, Safe & secure online banking.	en	fast safe secure online bank	Positive	App Store	0	0	0
App Store	8d8d4395-7e50-4f73-81d3-52e87ebda521	zaaa 123	1/7/23 23:20	Perfect				en	sa	sab-mobile	Smooth banking	en	smooth bank	Positive	App Store	0	0	0
App Store	0ad5a8da-3d53-4689-b3db-6263e8077cfe	yafaisms	9/30/22 12:48	Excellent service				en	sa	sab-mobile	Loving the experience	en	love experience	Positive	App Store	0	0	0
App Store	ceb50d0b-2fc8-4831-bbc9-189380dddfdd	쿠웨이트 city 47	2/27/23 0:45	My no.1 bank				en	sa	sab-mobile	SABB function is very good for me	en	sabb function good	Positive	App Store	0	0	0
App Store	65477b20-de7e-4604-a2e0-dac9deffcb43	Khalid Abubshait	9/4/22 8:08	SABB mobile app				en	sa	sab-mobile	Best bank mobile app experience ðððð½	en	best bank mobile app experience	Positive	App Store	0	0	0
App Store	9d90a6eb-53f8-4dcb-87a0-8ca397403fba	toarchbarer	9/30/22 15:55	New SABB app is good looking, user friendly, but slow.				en	sa	sab-mobile	As per the title.	en	per title	Neutral	App Store	0	1	0
App Store	24c023b0-c8c3-480a-9869-d5053ce50709	SnowingDaily	8/20/22 14:33	Very bad experience in raising claims				en	sa	sab-mobile	I raised a claim and was closed without a resolution. The process of raising claims is very bad and not sufficient. The customer care is not yet developed and not matching the customer expectations. I will not use the app again..	en	raise claim close without resolution process raise claim bad sufficient customer care yet develop match customer expectations use app	Negative	App Store	1	0	0
App Store	aaddb3aa-624d-4925-886f-4f5e8211f195	Shiz khan 15	4/30/23 1:45	Good				en	sa	sab-mobile	Very good and easy app service	en	good easy app service	Positive	App Store	0	0	0
App Store	37b4185d-4de6-448a-b6f5-fa787ea73665	snap: p_h1h	2/1/23 7:31	The are great				en	sa	sab-mobile	I like this banks and the app is incredible	en	like bank app incredible	Positive	App Store	0	0	0
App Store	bcc6b187-c67e-431d-b41c-fff67cb173af	Zohajas	1/9/23 19:52	Enjoying very much				en	sa	sab-mobile	Very authentic	en	authentic	Positive	App Store	0	0	0
App Store	4e12bc96-ad18-4118-870c-aeb75b7f515c	Happyy Love	11/9/22 19:32	Appreciate				en	sa	sab-mobile	Now new Update is excellent â¤ï¸â¤ï¸	en	new update excellent	Positive	App Store	0	0	0
App Store	f72b393e-ca33-453e-af82-9123d53141c9	mdsulthan	12/26/22 4:42	Easy to ise				en	sa	sab-mobile	New app is very user friendly.	en	new app user friendly	Positive	App Store	0	0	0
App Store	20135956-2230-468b-9e93-bcdacc85b72b	Paintershow	3/14/22 10:01	Perfect				en	sa	sab-mobile	It is pretty good, need some improvements to get to Alrajihi application	en	pretty good need improvements get alrajihi application	Positive	App Store	1	1	0
App Store	59d59e32-44d6-4940-819e-746a9aa42c45	yawar.abbas	3/25/23 16:43	Nice app				en	sa	sab-mobile	Nice and easy to use application	en	nice easy use application	Positive	App Store	0	0	0
App Store	1f34d32a-7da8-4afa-8780-5259546b8831	Aziziphone	8/29/22 7:27	Great Apps				en	sa	sab-mobile	Greetings team , Thank You for the great application.	en	greetings team thank great application	Positive	App Store	0	0	0
App Store	eccabafd-2498-4057-94cd-947480969c5b	ahmd nauf	8/7/22 17:00	Very easy banking				en	sa	sab-mobile	Best application	en	best application	Positive	App Store	0	0	0
App Store	7bf0ae69-675a-4007-8036-61fe482cf838	بتمالبزتنن	5/27/23 3:52	Mahmoyd				en	sa	sab-mobile	Application is very easy	en	application easy	Positive	App Store	0	0	0
App Store	126b00ef-3332-4df7-aae7-380e25248037	Burutuz	8/21/23 11:56	Great app!				en	sa	sab-mobile	Great app! Keeps improving and convenient to use.	en	great app keep improve convenient use	Positive	App Store	0	0	0
App Store	4702977c-31b1-43b8-9545-27fd1cea8790	saiful badal	12/12/22 12:59	Really nice app sabb mobile				en	sa	sab-mobile	Really nice app sabb mobile	en	really nice app sabb mobile	Positive	App Store	0	0	0
App Store	cc261563-fcd6-4d87-b86f-acb4ce292551	Osama Yousseg	8/25/22 6:55	Excellent Online Banking App				en	sa	sab-mobile	This is the best online banking app	en	best online bank app	Positive	App Store	0	0	0
App Store	9c7926c5-0bf2-4023-93e4-4ade29948278	Abu Jaser	8/6/22 5:39	Improving				en	sa	sab-mobile	Great upgrade	en	great upgrade	Positive	App Store	0	0	0
App Store	dfa934c2-9faf-4a8d-b269-44905d9566fc	kammoula82	8/30/23 11:11	Great and professional application				en	sa	sab-mobile	I love it ð¥°	en	love	Positive	App Store	0	0	0
App Store	659e9a06-c1e5-400e-b138-afb3bb4f5330	Nmb64	7/25/23 4:55	Very convenient				en	sa	sab-mobile	Very convenient	und	convenient	Positive	App Store	0	0	0
App Store	51222ed4-0563-44fb-9124-8c30565f6b66	Hadutchi	6/9/23 9:37	Thanks				en	sa	sab-mobile	Excellent digital services.	en	excellent digital service	Positive	App Store	0	0	0
App Store	2ba61e48-d476-4382-812f-8147c0b6d3d4	Siddiqui23	2/16/23 22:01	Service				en	sa	sab-mobile	Great services	en	great service	Positive	App Store	0	0	0
App Store	13738118-9d3c-4b68-a9ae-e4bc8bf723e1	zzzsfgyvvbj	4/4/23 18:41	Not working				en	sa	sab-mobile	Difficult to log in and bad customer service	en	difficult log bad customer service	Negative	App Store	1	0	0
App Store	34f26d62-0227-4b0f-bdd3-b600b8f19416	mohdraja	12/1/22 1:21	Love this				en	sa	sab-mobile	I love to use mobile sabb banking	en	love use mobile sabb bank	Positive	App Store	0	0	0
App Store	cf56c95e-2ba0-4100-9d99-93b953873b87	Sebas Fynn	6/23/23 7:47	Very good app				en	sa	sab-mobile	Yea works fine !!	en	yea work fine	Positive	App Store	0	0	0
App Store	13b06248-c9cd-462e-95de-408c1a94e101	Eng.Zaqzouq	2/24/23 14:25	Amazing app				en	sa	sab-mobile	The new app of SABB is really nice and easy to use	en	new app sabb really nice easy use	Positive	App Store	0	0	0
App Store	772a558f-78fc-4889-848e-e392f5e973c4	Jasim Gill	1/14/23 14:32	App is Good But but....				en	sa	sab-mobile	My user keeps on getting locked every 2-3 days, its soo annoying please fix that ðð»	en	user keep get lock every days soo annoy please fix	Negative	App Store	1	1	0
App Store	16a8cfb0-8e9f-425c-ad54-af1aa41c71ee	Binali28	6/24/22 8:35	Great.				en	sa	sab-mobile	Top mobile banking app.	en	top mobile bank app	Positive	App Store	0	0	0
App Store	7cf17453-5785-4b10-a99b-4da618f1f4bf	Norahsaleh87	5/25/22 8:27	Advance account				en	sa	sab-mobile	Amazing application	en	amaze application	Positive	App Store	0	0	0
App Store	d8c50db8-0a46-46f5-aaa6-f6072895febf	Omaireen	8/20/22 6:31	New Saab				en	sa	sab-mobile	Fast and new looking I like it. Thanks	en	fast new look like thank	Positive	App Store	0	0	0
App Store	48cdb837-493c-4ef7-ac87-6c315abee046	tybfrssfhj	5/28/23 14:47	Privacy				en	sa	sab-mobile	Why would a bank app ask for location?	en	would bank app ask location	Negative	App Store	0	1	0
App Store	ef9a927f-0a2c-426c-bbc0-1c1f843d322b	rahatworld	5/28/22 9:06	SABB				en	sa	sab-mobile	Service is fast and reliable and trustable	en	service fast reliable trustable	Positive	App Store	0	0	0
App Store	a809c5bc-8f48-4df9-a52c-b92c45730737	Abureem Visa	5/5/23 12:55	Sab top in onE				en	sa	sab-mobile	Proud to say that Iâm one of Sab A/c holder. Sab excellent service. Thanks to Almighty Allah ð¤²	en	proud say im one sab ac holder sab excellent service thank almighty allah	Positive	App Store	0	0	0
App Store	183b7fc8-df1c-4a3d-a926-e6367354a532	Naiser555	4/16/23 19:08	Good				en	sa	sab-mobile	The best and easy to use	en	best easy use	Positive	App Store	0	0	0
App Store	2e772d1b-3f46-4480-9e6f-e7601e1a1db3	boukia	1/17/23 20:29	Efficient progress				en	sa	sab-mobile	Very nice job...bravo to SABB bank	en	nice jobbravo sabb bank	Positive	App Store	0	0	0
App Store	e5a74c1b-ee67-47ee-ab2e-3c3408cd84c6	fakher0	11/23/22 8:58	easy				en	sa	sab-mobile	itâs too easy to finish all requirements even when i on bed	en	easy finish requirements even bed	Neutral	App Store	1	0	0
App Store	af8f033c-3627-418d-8be1-78faa75d7850	um toleen	6/7/22 0:05	Very good				en	sa	sab-mobile	Easy to use it.	en	easy use	Positive	App Store	0	0	0
App Store	a49dbc45-a2ae-4b27-9919-b00d352ed579	.Rafi	6/5/22 15:57	Easy and elegant				en	sa	sab-mobile	Very easy and elegant app	en	easy elegant app	Positive	App Store	0	0	0
App Store	65a86d79-3ea5-45c0-ab84-7c51a81f10e0	Vangie benj	8/28/23 19:35	Secure				en	sa	sab-mobile	Very convenient, secured and accessible app. â¤ï¸	en	convenient secure accessible app	Positive	App Store	0	0	0
App Store	a73385b6-300a-469c-8e09-306767145fec	Addy1186	7/3/23 18:57	Adnan Ashraf				en	sa	sab-mobile	Best App so far in mobile banking	en	best app far mobile bank	Positive	App Store	0	0	0
App Store	8cf53115-7025-490f-ae9f-41fac91cc17e	Rami blanco	5/14/23 6:39	Easy app				en	sa	sab-mobile	One of the best bank apps .. ðð¼	en	one best bank apps	Positive	App Store	0	0	0
App Store	72711a39-f7be-41f9-a415-e05e5f7b0f6c	Marwan Erfan	10/10/22 7:57	Marwan Erfan				en	sa	sab-mobile	Excellent, fast and reliable banking services	en	excellent fast reliable bank service	Positive	App Store	0	0	0
App Store	f7d268d6-831f-456f-850f-55fb4fe299d0	عبدالعزيز الباكر	8/18/22 8:04	Easy and Fast				en	sa	sab-mobile	Best Bank app ever	en	best bank app ever	Positive	App Store	0	0	0
App Store	7fadc644-3661-4152-9556-fca9c9615cac	majedwk	4/27/22 1:15	Last update				en	sa	sab-mobile	I think we facing a lot of problems itâs very slow and hung not work	en	think face lot problems slow hang work	Negative	App Store	1	1	1
App Store	cc78d5fc-e6d4-4008-bff3-969e9dda66df	Sofe Mata	2/22/22 20:43	Bad update				en	sa	sab-mobile	V bad update , once I sign in ; it went sign out on the same spot , I called many time customer service , no one solve the issue	en	v bad update sign go sign spot call many time customer service one solve issue	Negative	App Store	1	1	0
App Store	dfb5c54c-772f-468a-b690-428408b66ceb	Yasir Ustad	4/4/23 11:50	Best banking experience				en	sa	sab-mobile	Great staff always supporting us , Thanks SAAB for such great peoples	en	great staff always support us thank saab great people	Positive	App Store	0	0	0
App Store	14858d6b-571f-4023-b81f-d4d2ed1fb29b	Elhamie_abulata	12/11/22 11:51	Super nice app				en	sa	sab-mobile	Wry good app and very easy to use	en	wry good app easy use	Positive	App Store	0	0	0
App Store	834019c4-ad15-4b66-b598-82e92258707b	MariBala	9/5/22 5:26	Nice				en	sa	sab-mobile	Excellent interface	en	excellent interface	Positive	App Store	0	0	0
App Store	b8120e21-2869-454f-bd0d-168979309de6	skmusi	10/22/22 5:33	Not working				en	sa	sab-mobile	Since 2 days apps not working, there is something wrong please fix it	en	since days apps work something wrong please fix	Negative	App Store	0	1	0
App Store	41901328-f36e-44d6-951a-1fcf7c397eb5	Fat Dude_00	6/30/22 16:27	Very good				en	sa	sab-mobile	Very good and easy to use	en	good easy use	Positive	App Store	0	0	0
App Store	0b23f605-975e-49a5-a94c-4722f68684ff	yahya vengeance	5/29/22 7:58	Great				en	sa	sab-mobile	Thanks for the upgrade. Great	en	thank upgrade great	Positive	App Store	0	0	0
App Store	ac352229-ae12-4054-bd0f-2ff84e381291	bundesAlmarai	6/21/23 8:45	Rashid Dormohamed				en	sa	sab-mobile	All in just a touch	en	touch	Neutral	App Store	0	0	0
App Store	36d1d575-c4b3-43cf-8c3d-8e4cc3df8799	mkhashib	3/20/23 21:45	Complement				en	sa	sab-mobile	Good application and I like security	en	good application like security	Positive	App Store	0	0	0
App Store	01f79abd-adbe-43c9-81db-481851b51b23	Ahmed 307	12/17/22 19:56	Iqbal Ahmed				en	sa	sab-mobile	One of the best banking app Safe and secure. Privilage to have sabb account.	en	one best bank app safe secure privilage sabb account	Positive	App Store	0	0	0
App Store	597b0285-2e43-4459-b2c4-1e0f2abe25f5	Mimoelzahar	5/30/22 15:09	Good app				en	sa	sab-mobile	impressive performance	en	impressive performance	Positive	App Store	1	0	0
App Store	27517a74-7e28-425e-90b4-8e4b2d6312c5	xDarkhal	6/22/23 9:25	Bank sabb				en	sa	sab-mobile	Bad service is do not recommend at all if you are i donât recommend to put you calary on bank sabb i rather go other banks batter then sabb ðð»ðð»ðð»ðð»	en	bad service recommend dont recommend put calary bank sabb rather go bank batter sabb	Negative	App Store	1	0	0
App Store	faeebef0-cc2e-4258-a231-d9ce659a80b6	sbinaslam	5/27/22 11:27	Good				en	sa	sab-mobile	Easy to handle	en	easy handle	Neutral	App Store	0	0	0
App Store	3dbb7054-f288-4008-8c3a-480ceb3c436b	ijasmpd	4/24/23 12:05	App enjoy				en	sa	sab-mobile	Good app enjoy all transactions	en	good app enjoy transactions	Positive	App Store	0	0	0
App Store	aae0c887-2ef5-4b05-9fc1-be47ed5e23a9	Eng wail	4/17/23 19:40	Best Bank app				en	sa	sab-mobile	One of the best bank app	en	one best bank app	Positive	App Store	0	0	0
App Store	39d2b109-f792-4ad0-bbc9-c0e584b4776e	mueeqj	8/17/23 8:35	SAB Bank App				en	sa	sab-mobile	Great app very responsive and easy to navigate	en	great app responsive easy navigate	Positive	App Store	0	0	0
App Store	513e4fb0-4f4b-49da-8595-0d73f7d23474	raybbrx	5/7/23 19:05	The app stopped worked				en	sa	sab-mobile	Itâs not working anymore crashes a lot	en	work anymore crash lot	Negative	App Store	0	1	0
App Store	4b2c70fc-47a1-4f72-bca5-574da42282d2	mystereeboi	1/18/23 9:09	Best Mobile Banking App				en	sa	sab-mobile	Loved it	en	love	Positive	App Store	0	0	0
App Store	d841af4a-206d-4eb3-bc3b-81ca8692cc94	Waheed. H2O	12/23/22 10:16	Perfect				en	sa	sab-mobile	It woks exactly how i want it	en	woks exactly want	Positive	App Store	0	0	0
App Store	979e0afc-82c1-4248-a2da-f6bf2e4a9177	1albinali	11/12/22 12:04	Best bank				en	sa	sab-mobile	Love it so much	en	love much	Positive	App Store	0	0	0
App Store	436d45ff-e5fb-4bdd-b4ef-c271b00cff58	Mustapha.Hemeda	7/26/22 21:25	Dr. Muscles				en	sa	sab-mobile	Sabb mob. App is the most user friendly app ever	en	sabb mob app user friendly app ever	Positive	App Store	0	0	0
App Store	0a403385-4235-45f6-9654-a9d0ff5fe2ea	fozan1979	8/26/23 15:58	Fozan				en	sa	sab-mobile	Every thing is good	en	every thing good	Positive	App Store	0	0	0
App Store	0ab7c773-6030-4072-b6ef-d42b9d8ad72a	dhanak pari	7/6/23 19:00	Service of SABB				en	sa	sab-mobile	Staff is very cooperative and service is commendable.	en	staff cooperative service commendable	Positive	App Store	0	0	0
App Store	dc19bf0e-f288-49c8-89c6-329fc67715fd	Aryousuf	4/28/23 11:22	Very good				en	sa	sab-mobile	One of the best Banking Application	en	one best bank application	Positive	App Store	0	0	0
App Store	b1bee86c-269c-4eac-91c0-255e89edb537	Zico1977999	8/27/22 9:23	Zakaria Mattar				en	sa	sab-mobile	One of the best mobile apps	en	one best mobile apps	Positive	App Store	0	0	0
App Store	fa228bc0-305a-4b7d-a800-cdd30a920ef8	khaled41990	10/30/22 13:22	Not really good app				en	sa	sab-mobile	All day bugs, Failed processes due to technical issues. Too much time loading	en	day bug fail process due technical issue much time load	Negative	App Store	0	1	0
App Store	fb52dca1-fb76-4cfc-a0d7-f247f00d356c	prembaral	5/8/22 6:45	Awesome				en	sa	sab-mobile	Itâs awesome delivery within a minute	en	awesome delivery within minute	Positive	App Store	0	0	0
App Store	bee225f3-0205-480f-aa4b-76f7a0f5dd1b	Obaid Billa	3/13/22 7:58	Very Good and Great user Interface				en	sa	sab-mobile	Very good application	en	good application	Positive	App Store	0	0	0
App Store	f9ccc7f7-2388-4b7b-b338-fa05bb805611	Mudassar naveed	7/1/23 15:30	Best service				en	sa	sab-mobile	Best service	en	best service	Positive	App Store	0	0	0
App Store	127e6d10-0ef9-40e4-a2e2-f4676ee1cf5b	koinz fan	6/29/23 7:38	👌🏻🙏🏼				en	sa	sab-mobile	So easy and helpful	en	easy helpful	Positive	App Store	0	0	0
App Store	b722ab76-fa8b-4480-bf77-8b97cde63108	Rasheed 81	2/27/23 9:59	Top notch				en	sa	sab-mobile	Best banking experience.	en	best bank experience	Positive	App Store	0	0	0
App Store	80debd74-2a15-42c7-af41-9264e9a512c9	chellamuru	11/29/22 3:16	Good to great				en	sa	sab-mobile	Really good and improved	en	really good improve	Positive	App Store	0	0	0
App Store	2a70b90d-9c0e-424f-a38f-6dc058bddcac	Salman9773	1/10/23 22:58	Very Easy Function And Fast services.				en	sa	sab-mobile	This new update of SABB BANK APPLICATION its very easy to used.	en	new update sabb bank application easy use	Positive	App Store	0	0	0
App Store	420449ad-ac8c-47eb-b00b-b2c4daa2ccdd	Hafizure	9/11/22 10:04	Syed Hafizure				en	sa	sab-mobile	User friendly and best app	en	user friendly best app	Positive	App Store	0	0	0
App Store	00dd5d5c-8853-462b-ab87-0eb75f2558ce	HEHE6666	2/21/22 6:43	Last UX design was more clear and better				en	sa	sab-mobile	this worst UX enhancement Bring the last design app,	en	bad ux enhancement bring last design app	Negative	App Store	1	0	0
App Store	fde762db-2b91-4452-b502-12394e4b22f2	cevaram	6/13/23 3:55	Super fast				en	sa	sab-mobile	Super fast	en	super fast	Positive	App Store	0	0	0
App Store	12444aae-a5bb-4c97-994a-292a67bbaeda	شفيق الفارس	4/9/23 10:21	Awesome Service				en	sa	sab-mobile	One of the best banking service in KSA..	en	one best bank service ksa	Positive	App Store	0	0	0
App Store	109971e1-6aa6-4227-abe3-ca8bb6bc1e3d	Yacoub 444	12/26/22 10:35	Excellent i like it				en	sa	sab-mobile	Excellent i like it	en	excellent like	Positive	App Store	0	0	0
App Store	4896d634-c4c7-48d4-8462-29e847489cd2	Siddjhu	12/26/22 7:24	Great				en	sa	sab-mobile	Itâs very simple and very secured	en	simple secure	Positive	App Store	0	0	0
App Store	69588b63-c3c1-437d-aa9c-7a1f4a8d5c5d	Jeff's Huggies	11/29/22 15:52	Great app				en	sa	sab-mobile	I think SABB has the best banking app among all banks	en	think sabb best bank app among bank	Positive	App Store	0	0	0
App Store	f7bc9d21-d601-47d1-be9c-eaf19d804436	abunada	11/24/22 8:15	Best electronic banking				en	sa	sab-mobile	Very nice and clean system	en	nice clean system	Positive	App Store	0	0	0
App Store	2d676371-5712-4eb1-a8ad-65bfef8accb8	Mustafa Abo Haider	8/23/22 11:26	SABBMobile is one of the best				en	sa	sab-mobile	I really enjoy the experience with SABBMobile	en	really enjoy experience sabbmobile	Positive	App Store	0	0	0
App Store	cbc6937a-7060-4b46-997c-053b5a2c2ecf	yginan1	8/7/22 7:03	The best				en	sa	sab-mobile	The best app for banking so far	en	best app bank far	Positive	App Store	0	0	0
App Store	683d0296-78cc-4943-b355-97dda49a17f0	SHAHYEAHYEA	7/29/22 23:58	Nice 😊				en	sa	sab-mobile	Iâm a satisfied customer	en	im satisfy customer	Positive	App Store	1	0	0
App Store	fab7d717-ae42-49fb-80a5-9c2b75429d48	afthabmc	8/2/23 13:12	Good				en	sa	sab-mobile	Good and best user experience	en	good best user experience	Positive	App Store	0	0	0
App Store	e94cef75-cb6b-4a6a-967c-423fb24e70a0	Suzanne’s	6/10/23 17:09	Transfers				en	sa	sab-mobile	Excellent and super easy	en	excellent super easy	Positive	App Store	0	0	0
App Store	6fcfb07c-ed57-491c-b2ea-8ced1c3aec26	ellooooord	3/2/23 11:20	Very good				en	sa	sab-mobile	I like the app	en	like app	Positive	App Store	0	0	0
App Store	f34276bc-1361-45c8-a7b9-459cdce28fd6	Alaseer	4/27/22 0:41	Worst mobile app				en	sa	sab-mobile	The application is the worst among all other local banks, very slow and clashes very often	en	application bad among local bank slow clash often	Negative	App Store	1	0	1
App Store	432bfd61-2f43-447c-bf8d-98624c4a066a	bobzitta	7/13/23 5:17	Enjoying				en	sa	sab-mobile	Enjoying	und	enjoy	Positive	App Store	0	0	0
App Store	c7710667-4732-4998-be5a-719b5c89e5a3	Riznaas	5/3/23 15:36	Good app it’s very fast				en	sa	sab-mobile	Itâs awesome	en	awesome	Positive	App Store	0	0	0
App Store	dcd7dcd2-61d9-4ebd-80ea-4d145a727c78	syed abu sufyan	5/2/23 1:52	Good Performance				en	sa	sab-mobile	Good performance as per customer requirements â¦	en	good performance per customer requirements	Positive	App Store	0	0	0
App Store	e666072e-330f-43da-9384-805116dc240e	Shafee M. Shaik	2/28/23 16:06	Simply amazing				en	sa	sab-mobile	Great application with simplicity â	en	great application simplicity	Positive	App Store	0	0	0
App Store	98edb8ac-0440-4004-8821-6c40f48438ed	SyedSNA	4/1/23 7:31	Excellent Banking Services, peace of mind…				en	sa	sab-mobile	Trustable banking services ease of useâ¦	en	trustable bank service ease use	Positive	App Store	0	0	0
App Store	79b16487-9fbb-49ae-ad35-42e0ed3b0706	MuseMoe	11/27/22 10:24	Fabulous				en	sa	sab-mobile	Amazing app to conduct all banking proceduresâ¦	en	amaze app conduct bank procedures	Positive	App Store	0	0	0
App Store	f63bbb3a-1153-4045-94c4-cf1dc4eb32a1	Dr.Amr Gad	6/6/22 14:39	Professor Amr Gad				en	sa	sab-mobile	One of the best banks all over the world.	en	one best bank world	Positive	App Store	0	0	0
App Store	380840df-21b3-4871-881f-f674574b4fc4	A.nawar.83	11/8/22 7:20	Nawar				en	sa	sab-mobile	More Flexible and easy use	en	flexible easy use	Positive	App Store	0	0	0
App Store	815cc720-a529-426c-8f8d-c9fecf45e73c	Muhammad Azam Khan	5/1/22 10:56	It’s Cool				en	sa	sab-mobile	Itâs Cooler then my thoughts I appreciate To Saab bank	en	cool thoughts appreciate saab bank	Positive	App Store	0	0	0
App Store	a2d34ad2-2d20-4f83-91ab-244354446ccf	fowzi911	2/19/22 14:04	Update for iPad				en	sa	sab-mobile	The new update not working properly for iPads and fit the screen	en	new update work properly ipads fit screen	Negative	App Store	0	1	0
App Store	0d664e6d-6567-4261-b115-67d8d64f36eb	Meer515	6/5/23 20:55	Review				en	sa	sab-mobile	Amazing app. Must use.	en	amaze app must use	Positive	App Store	0	0	0
App Store	b03d58e9-a3d0-4f97-9513-06c9e8b32a8b	Mhamid09	5/18/23 18:11	THANKS				en	sa	sab-mobile	I respect the security and availability. Itâs powerful APP	en	respect security availability powerful app	Positive	App Store	0	0	0
App Store	88ee7d22-84f0-48cd-a855-5314ef80b625	Jafeel 123	7/6/22 10:09	Good				en	sa	sab-mobile	Best one and easy	en	best one easy	Positive	App Store	0	0	0
App Store	6a5da656-2155-46e0-8e85-4f8135f7f91d	M.jafar	6/14/22 8:24	Great app				en	sa	sab-mobile	Easy & fast	en	easy fast	Positive	App Store	0	0	0
App Store	ac684fc5-8304-4b15-b623-21da0427bbf8	arwa.sindi	5/26/22 2:05	Very good				en	sa	sab-mobile	Ease to use	en	ease use	Neutral	App Store	0	0	0
App Store	496957ea-fc2b-4c5f-b9de-0d72bd20796e	WaheedOB	2/27/23 14:02	So seamless and productive				en	sa	sab-mobile	Itâs a great banking app	en	great bank app	Positive	App Store	0	0	0
App Store	1b669b6c-77f0-4193-917d-a7b6b7d6ebb4	Shammaase mone	12/6/22 10:15	Fastest Responding				en	sa	sab-mobile	Very good serviceâs	en	good service	Positive	App Store	0	0	0
App Store	ab697f2c-a22a-429f-963b-7e7093b6568d	Jef Jmhm	8/11/22 6:50	Lovely bank				en	sa	sab-mobile	Perfect App	en	perfect app	Positive	App Store	0	0	0
App Store	e58e25dc-a780-40b3-9c33-ba125cef619f	EH-ebra	11/14/22 13:10	App so good but!!				en	sa	sab-mobile	Ux so good, but why you need me to enable location to use the app !!	en	ux good need enable location use app	Neutral	App Store	0	0	0
App Store	0dd08cbf-b6a1-44e0-be3f-3c76bf974e7d	abshahas	3/29/23 14:40	Cool				en	sa	sab-mobile	Love the Auto Expense manager categories	en	love auto expense manager categories	Positive	App Store	0	0	0
App Store	7e1bd4a1-1e29-4fa1-977d-82e5a150b6b7	Abo Aseel2000	3/16/23 13:12	Great app				en	sa	sab-mobile	Amazing experience	en	amaze experience	Positive	App Store	0	0	0
App Store	23a0dbd6-2fb9-4109-907e-88144fd53ac7	gxievr	11/28/22 12:14	best bank online app				en	sa	sab-mobile	one of the best, but actually the best banking app iâve used	en	one best actually best bank app ive use	Positive	App Store	0	0	0
App Store	c63a39d0-8201-4ebd-bfe3-eb1e798b80ab	XianLianne	8/3/22 18:07	good servce				en	sa	sab-mobile	good very good i hope u have same international send money same stc pay	en	good good hope u international send money stc pay	Positive	App Store	0	0	0
App Store	9a783e00-00cb-496b-9901-eeb4c440b23a	n123n123n	1/26/23 6:11	Easy and flexible app				en	sa	sab-mobile	Easy and flexible app	en	easy flexible app	Positive	App Store	0	0	0
App Store	697c67e5-47e4-4162-bebb-82e53cacaf21	amm4r8ashir	9/20/22 21:59	AK				en	sa	sab-mobile	Really well built app	en	really well build app	Positive	App Store	0	0	0
App Store	d4f242d0-2557-44ed-a47d-f1006a26936c	Arab Artist Inc	6/3/22 14:08	Great app				en	sa	sab-mobile	Great app and interface ðð	en	great app interface	Positive	App Store	0	0	0
App Store	79d7ff0c-8e35-4dea-9e53-815782d5d6b3	Khal86_	3/13/22 16:46	International Money transfer issue				en	sa	sab-mobile	International money transfer still not working..	en	international money transfer still work	Negative	App Store	0	1	0
App Store	0ca42592-3b3c-46a6-a4fc-ef1a04c27b76	terry621	8/3/23 8:39	New SAB				en	sa	sab-mobile	Keep up the great standards!	en	keep great standards	Positive	App Store	0	0	0
App Store	ea9beb8b-b43b-4bd4-868e-129b02d9eb16	Abdullah Khedr	2/4/23 11:21	Very good				en	sa	sab-mobile	Iâm so satisfying	en	im satisfy	Positive	App Store	0	0	0
App Store	9fe873b3-115d-4653-bcd8-67646dd7991b	imthias sahib	11/27/22 14:35	Great work				en	sa	sab-mobile	Great work	en	great work	Positive	App Store	0	0	0
App Store	fb214b39-e813-496a-b125-ac7bc7aae672	Llenradski	7/26/22 1:03	Very good 👍 and useful				en	sa	sab-mobile	Helpful	en	helpful	Positive	App Store	0	0	0
App Store	3b8eeb82-b09c-4473-8563-b29a8788c71e	omer8898	9/28/22 23:32	Log off error worst app				en	sa	sab-mobile	App logs off after 2 secnds of login, worst app and worst customer service, tom & jerry bank	en	app log secnds login bad app bad customer service tom jerry bank	Negative	App Store	1	1	0
App Store	8cd2a2a3-fbde-4d54-93e3-f6f4e3ed8041	Muadh86	5/27/23 20:02	Muath				en	sa	sab-mobile	Great upgrades in the app	en	great upgrade app	Positive	App Store	0	0	0
App Store	fbe711e7-f83e-4c3d-bf4e-c6fbea611ac1	Salman.92	4/15/23 13:36	Great app				en	sa	sab-mobile	Great banking services	en	great bank service	Positive	App Store	0	0	0
App Store	efc71840-cac6-4b5b-82ab-dd16123929a0	saha shukur	2/4/23 18:09	SABB mobile app				en	sa	sab-mobile	SABB mobile app is excellent ð	en	sabb mobile app excellent	Positive	App Store	0	0	0
App Store	843cea2c-3bcf-4a49-947a-0f3eadb5928d	Sweet cramel	10/1/22 15:46	Using SABB net				en	sa	sab-mobile	Very simple using	en	simple use	Neutral	App Store	0	0	0
App Store	11e79a95-48fd-4c36-bd19-b7b6ef740956	Mag4444444	11/21/22 11:19	App				en	sa	sab-mobile	The app hanging alot and i cant sort my accounts to be displayed in the homepage	en	app hang alot cant sort account display homepage	Negative	App Store	0	1	1
App Store	98fca3bb-e971-4ee7-93c1-9529bd59598c	xvbgrdf	5/8/22 21:54	Good				en	sa	sab-mobile	Overall good	en	overall good	Positive	App Store	0	0	0
App Store	cc58b71d-76bd-485f-bb78-0da01e317481	بوديمه	6/10/22 16:22	Great				en	sa	sab-mobile	Outstanding application	en	outstanding application	Positive	App Store	0	0	0
App Store	4b093f39-2270-4047-a0fe-b3ebbaa8740d	Ceahmed2010	2/9/22 8:41	Amazing App				en	sa	sab-mobile	Thanks SABB for your great services. Amazing App	en	thank sabb great service amaze app	Positive	App Store	0	0	0
App Store	a7c8475f-f3f6-4f5e-beaf-cbe3a3031f9c	Samer.Hindi	2/11/22 10:21	Alawal bank was much better				en	sa	sab-mobile	Alawal bank application was much better than this	en	alawal bank application much good	Positive	App Store	0	0	0
App Store	efa7681e-5e97-46f1-85ff-db7f1558fbc6	wkhursheed	7/13/22 0:47	Sr. Sales & Marketing Manager				en	sa	sab-mobile	Really excellent app.	en	really excellent app	Positive	App Store	0	0	0
App Store	d3b3ee13-ecc6-4608-b51d-e5c116ae7500	Haythamismail	6/7/22 13:57	Geary App				en	sa	sab-mobile	Efficient and handy	en	efficient handy	Positive	App Store	0	0	0
App Store	92440537-f04d-404e-9217-2d0792249bb9	Klinsmann18	9/13/23 12:05	Great app				en	sa	sab-mobile	Ä° like it	en	like	Neutral	App Store	0	0	0
App Store	e022a121-5503-4800-bb03-e3f985f228fb	RushfaZ_	7/17/22 19:58	Password is not case sensitive				en	sa	sab-mobile	Password is not case sensitive	en	password case sensitive	Neutral	App Store	0	1	0
App Store	4d9717d4-58ec-490b-9773-86b330650aad	Jamal AC	9/29/22 9:35	Jamal				en	sa	sab-mobile	Super nice and easy	en	super nice easy	Positive	App Store	0	0	0
App Store	6a24138d-6390-4529-a2a7-4e1c4926c2e9	Abdulla AM	6/22/23 13:22	Good				en	sa	sab-mobile	Alhamdulillah very useful	ms	alhamdulillah useful	Positive	App Store	0	0	0
App Store	3d3fdb1b-075d-43f6-b188-9876201c9cd9	Imran Madani	12/11/22 19:30	APP				en	sa	sab-mobile	Excellent work	en	excellent work	Positive	App Store	0	0	0
App Store	66911e38-2eba-4ab9-838a-ad0687853c79	ZAG79	5/16/22 7:15	Zaigham				en	sa	sab-mobile	Great bank awesome services.	en	great bank awesome service	Positive	App Store	0	0	0
App Store	88c24c18-8598-4acd-8e0d-6e52a70905b2	Sinan7	2/11/22 10:59	5-Star App				en	sa	sab-mobile	Best banking experience in Saudi Arabia!	en	best bank experience saudi arabia	Positive	App Store	0	0	0
App Store	17b446d7-e66c-4676-a344-4a02b60aa361	yasa0000	5/6/22 4:55	Application				en	sa	sab-mobile	It is really nice and practical	en	really nice practical	Positive	App Store	0	0	0
App Store	fc998d69-ee06-4d86-af78-9454d62cdee6	Hishamhkh	2/13/22 13:07	Put back the old app				en	sa	sab-mobile	The new app stopped my face login Iâd and canât re-setup any login methods	en	new app stop face login id cant resetup login methods	Negative	App Store	0	1	0
App Store	9b555547-de29-4ed0-ad2c-59cc83e991ce	Safar50	8/30/23 20:40	Hi				en	sa	sab-mobile	Fast and reliable	en	fast reliable	Positive	App Store	0	0	0
App Store	0a8ac68d-fffc-49df-8812-e54941a0106a	Prakash sugumar	7/3/22 17:36	Mr Prakash				en	sa	sab-mobile	Itâs very good easy to use	en	good easy use	Positive	App Store	0	0	0
App Store	2b2cdf9e-bc93-4ce9-a3a2-e3ce7b932830	Mira Jane26	3/21/22 14:40	amazing experience with sabb!!!				en	sa	sab-mobile	fast and reliable bank..	en	fast reliable bank	Positive	App Store	0	0	0
App Store	a938e26b-5a6a-4641-a329-ad5a9073afb8	hussanTBC	8/26/23 9:57	Hussan Muhammad				en	sa	sab-mobile	Very nice service	en	nice service	Positive	App Store	0	0	0
App Store	1f6c921a-19f0-4072-90ef-cfac81e32204	midoemptyheart	5/29/23 6:29	Very good				en	sa	sab-mobile	It's amazing	en	amaze	Positive	App Store	0	0	0
App Store	3585d41a-1819-4bf2-9c99-6ec89202dfde	Abu Samad Sultan	3/20/23 12:51	Safety				en	sa	sab-mobile	Very good easy to used safely	en	good easy use safely	Positive	App Store	0	0	0
App Store	438228dd-4cde-44d3-96fb-1a007c34d795	Prabhakara govinda	3/31/23 15:59	Prabhakar				en	sa	sab-mobile	Service was excellent	en	service excellent	Positive	App Store	0	0	0
App Store	6d996e71-54b2-402b-856e-a6dcfa7ee5a9	ruix ximon	4/11/22 17:21	Very good! No charge fee				en	sa	sab-mobile	Its great.!	en	great	Positive	App Store	0	0	0
App Store	adfa6285-8e9d-49f2-84ff-5f919bbb63d0	Yunuss13	1/14/23 10:50	App is super cool				en	sa	sab-mobile	App is super cool and good to use	en	app super cool good use	Positive	App Store	0	0	0
App Store	175523fe-5ced-4112-879e-6eb49f27ffb9	Wajhi Hassan	11/14/22 16:47	Dear				en	sa	sab-mobile	Excellent App and works perfeectly	en	excellent app work perfeectly	Positive	App Store	0	0	0
App Store	92da9ef7-d024-4499-b96f-08999c4e18f9	_\~Sammy~/_	7/16/22 10:55	Best banking app				en	sa	sab-mobile	The best ever banking app	en	best ever bank app	Positive	App Store	0	0	0
App Store	eb645dcc-04b8-4e4e-9c71-e9bedcdc6530	Eiasjooo	5/21/22 19:54	Eiasjo				en	sa	sab-mobile	Good and smooth app	en	good smooth app	Positive	App Store	0	0	0
App Store	090a40f2-08b1-43fe-84e6-1fbaaa739c4a	Jamila8585	9/6/23 12:14	Great App				en	sa	sab-mobile	Great app of a great bank	en	great app great bank	Positive	App Store	0	0	0
App Store	2fefe387-85cb-4c48-a99b-883109313ef9	Abdur Rahman Ahmad Ali	7/5/22 12:07	Review				en	sa	sab-mobile	Best App and best bank	en	best app best bank	Positive	App Store	0	0	0
App Store	627d37d4-743a-4bfc-9a78-e8e77285e6b9	Mr. Me15	8/24/23 7:19	👍🏼				en	sa	sab-mobile	Very nice design and great job	en	nice design great job	Positive	App Store	0	0	0
App Store	db4a252a-f036-4cdb-8adf-46dfd91e35b1	Saud Alomani	3/12/23 22:01	Great				en	sa	sab-mobile	Your money at the tip of your finger. It is SABB WAO	en	money tip finger sabb wao	Neutral	App Store	0	0	0
App Store	ee8e0452-aa83-4196-9807-79228959a3ee	desertstag	9/13/22 4:59	Good and fast				en	sa	sab-mobile	Speedy app	en	speedy app	Positive	App Store	0	0	0
App Store	67db46b8-ee98-4d7d-a5e7-538edd83aa5c	Sari KSA	5/14/23 18:01	Great Experience				en	sa	sab-mobile	Great Experience	und	great experience	Positive	App Store	0	0	0
App Store	8d02b6c8-ca13-4963-91d6-3b9100e2d60e	Areejms5	3/3/23 8:02	Great				en	sa	sab-mobile	The best banking app ever	en	best bank app ever	Positive	App Store	0	0	0
App Store	b49dbfeb-c26b-49da-badb-cb25aa231a28	Khalifa83	8/30/22 9:13	Khalifa				en	sa	sab-mobile	Fantastic application	en	fantastic application	Positive	App Store	0	0	0
App Store	737fb84d-0865-41ec-add2-bf1ba012c54a	M. Sahm	7/3/22 13:21	Excellent App				en	sa	sab-mobile	Excellent review and app	en	excellent review app	Positive	App Store	0	0	0
App Store	8377c027-2759-4448-8a27-6deced27402d	Hameed085	7/7/22 17:30	Amazing app for banking				en	sa	sab-mobile	Amazing app for banking	en	amaze app bank	Positive	App Store	0	0	0
App Store	708f2bb1-6ab7-4c52-8ffa-b0ee7dcc5ef1	coycoy02	1/7/23 18:01	Sabb feedback				en	sa	sab-mobile	Good apps	en	good apps	Positive	App Store	0	0	0
App Store	64274f78-bc9a-4bb9-b547-a5ff75ee08b8	Feedback 🅰️	3/28/23 13:54	IMPORTANT FEEDBACK FOR SABB NET	{'id': 35720025, 'body': 'Dear, Customer\n\nTo share your Feedback with us, submit an email to FEEDBACK@SABB.COM.', 'modified': '2023-04-02T09:55:46Z'}			en	sa	sab-mobile	There are important points to address..please have a SABB representative to call me .	en	important point addressplease sabb representative call	Neutral	App Store	1	1	0
App Store	6bf1c1fb-58e6-4dc6-bef3-fef9b890869e	Khaledgabr	8/15/22 21:56	SABB banking application				en	sa	sab-mobile	Great banking application	en	great bank application	Positive	App Store	0	0	0
App Store	a2a1347b-9f85-49e6-9981-95c04c015c32	Noman87	5/16/23 18:17	Best				en	sa	sab-mobile	Good user style	en	good user style	Positive	App Store	0	0	0
App Store	e2061b98-c692-4082-b13f-520340e9e970	Bo7aMatO	3/2/23 7:36	Nice				en	sa	sab-mobile	Itâs evolving with stable steps.	en	evolve stable step	Positive	App Store	1	0	0
App Store	bdfc612c-68ec-46ae-a6a5-efd4a04f740f	nizar nizu	3/29/23 6:31	Awesome				en	sa	sab-mobile	Awesome banking services	en	awesome bank service	Positive	App Store	0	0	0
App Store	c4ed7ff4-81d0-4b51-84f5-a5978941d86d	Abu Seba 5	11/8/22 19:25	Amazing app				en	sa	sab-mobile	Great job ðð»	en	great job	Positive	App Store	0	0	0
App Store	121f860b-a206-4a20-b932-bf494ea723b3	MF Eva	7/12/22 15:41	Slow				en	sa	sab-mobile	Very slow comparing to other Apps of Banks in Saudi Arabia.	en	slow compare apps bank saudi arabia	Negative	App Store	0	0	1
App Store	f48405d4-4707-40db-b0d0-af7a9706025f	maysarhi2	2/26/23 10:33	Thanks for efforts				en	sa	sab-mobile	Thanks for efforts	en	thank efforts	Positive	App Store	0	0	0
App Store	dfbfdaf7-9610-439f-8c29-7bc4873bbb8e	mohammed.abuhammed.5	5/19/22 23:38	Very good				en	sa	sab-mobile	Very good app for sabb	en	good app sabb	Positive	App Store	0	0	0
App Store	5263e741-82cc-40f8-bdbb-32d6b1c6c2a6	mgarad	8/20/23 16:13	Excellent				en	sa	sab-mobile	So good	en	good	Positive	App Store	0	0	0
App Store	c7e4d97b-df2c-45b9-b2ba-781d540410bd	Moin hossain	4/19/23 21:20	Very nice				en	sa	sab-mobile	Good and best	en	good best	Positive	App Store	0	0	0
App Store	2bda5859-f627-46fb-9338-f747cea02d35	Ronaldo@28	5/8/23 18:40	app is very useful and fast				en	sa	sab-mobile	very good app, useful and fast	en	good app useful fast	Positive	App Store	0	0	0
App Store	1e201cef-2870-4614-8382-8e177ae1923b	Ansar Aslam	9/12/22 9:35	sabnet app				en	sa	sab-mobile	its good app very helpful i like it	en	good app helpful like	Positive	App Store	0	0	0
App Store	598e3bec-a859-418a-8255-b59b3c3d79f6	Mamdouh Botros	11/24/22 6:01	Mamdouh				en	sa	sab-mobile	Easy & Good App	en	easy good app	Positive	App Store	0	0	0
App Store	343f6a1c-c8f3-48af-9b3f-3f2e53e781b5	سعيييييييييد	6/20/22 21:45	Very good				en	sa	sab-mobile	Nice App	en	nice app	Positive	App Store	0	0	0
App Store	4cc1c337-b448-4e71-a4f0-8dae66d554a6	Siva Rama kumar	4/26/23 14:28	Anil				en	sa	sab-mobile	Nice experience	en	nice experience	Positive	App Store	0	0	0
App Store	44c51112-a18e-44fa-a360-689a85dc2cf6	Y8889k	2/12/23 23:24	Sabb				en	sa	sab-mobile	Fastest service ever ð	en	fast service ever	Positive	App Store	0	0	0
App Store	91b80e48-2ee9-402f-b5e2-7bf9293f2d54	billionaire50000000	5/5/22 0:10	Sabb				en	sa	sab-mobile	Sabb bank the best one	en	sabb bank best one	Positive	App Store	0	0	0
App Store	88b81e72-e028-4fb0-af97-cbe42829619d	Jafari1	2/26/23 5:24	Good				en	sa	sab-mobile	The app is good and helpful	en	app good helpful	Positive	App Store	0	0	0
App Store	d5f1ab7a-fcb7-4d4c-a2b5-da77c10397cb	Beko1411	7/11/23 20:39	🫤				en	sa	sab-mobile	The worst banking app I have ever used.	ar	bad bank app ever use	Negative	App Store	1	0	0
App Store	f9033b56-d50d-4e44-abe7-d0cb26537690	Albashiri Rakan	2/25/23 5:46	Nice				en	sa	sab-mobile	Improving	en	improve	Positive	App Store	0	0	0
App Store	3a3772b9-3a99-47a1-99f6-5cef843e791d	H122	7/12/23 2:55	Nice				en	sa	sab-mobile	Handy and within the reach	en	handy within reach	Neutral	App Store	0	0	0
App Store	61b7604a-9859-48a3-a4b3-6359df79e355	toufik_hamzedb	4/29/23 22:00	Good				en	sa	sab-mobile	Very nice	en	nice	Positive	App Store	0	0	0
App Store	c2cc2738-59e2-4854-830e-ebf39e79aa0c	frrreeks	10/7/22 20:25	The best				en	sa	sab-mobile	The best in the world	en	best world	Positive	App Store	0	0	0
App Store	6b7b1fd8-e87a-442f-9237-b5fc5e02d802	Ahmed Malik 99	12/29/22 20:13	Mr				en	sa	sab-mobile	SABB is providing best service	en	sabb provide best service	Positive	App Store	0	0	0
App Store	67065cbb-c7f5-419e-a749-21aea0b7f005	RA SAQIB	12/29/22 4:17	SAQIB Mehmood				en	sa	sab-mobile	Brilliant service	en	brilliant service	Positive	App Store	0	0	0
App Store	84fddc79-6b51-472f-bfea-5cc70684c71d	Malajmi80	12/10/22 15:14	My baby SABB				en	sa	sab-mobile	Fantastic	en	fantastic	Positive	App Store	0	0	0
App Store	0838bb48-3a01-4860-9caf-6879e222d503	Sajiii Mughal	8/29/22 15:47	SABB				en	sa	sab-mobile	Great People Great Servicesðð¿	en	great people great service	Positive	App Store	0	0	0
App Store	a8cdc6a3-9c99-4423-8068-d4da1ba7ae81	Israr2018	8/11/23 20:43	SAAB				en	sa	sab-mobile	Excellent Banking Service very good experience with SAAB Bank	en	excellent bank service good experience saab bank	Positive	App Store	0	0	0
App Store	44adc37d-0c43-4950-b059-6b0bb601e1fb	UNDEFEATED GH	7/1/22 5:27	Number ☝️				en	sa	sab-mobile	ð¤ð¤â¤ï¸â¤ï¸â¤ï¸	und		Neutral	App Store	0	0	0
App Store	69a96c32-f0b1-4d58-a527-c4fb52de7a70	ip1510	11/29/22 6:01	Pashaia				en	sa	sab-mobile	SABB= Super Access Best Bank	en	sabb super access best bank	Positive	App Store	0	0	0
App Store	e33fa2dc-8474-4fb2-b920-268092201c64	Shaikmohsinpasha	3/18/23 11:49	Shaik				en	sa	sab-mobile	Amazing app	en	amaze app	Positive	App Store	0	0	0
App Store	f48deda5-5c32-44f0-9950-4d433952fab4	Justin Pulikkottil	5/1/23 21:44	Very Good				en	sa	sab-mobile	Itâs Cool	en	cool	Positive	App Store	0	0	0
App Store	67cf1be3-a5e4-40b4-a9c9-3a5d8ebfb7e9	Saknah	2/14/23 19:19	Thx				en	sa	sab-mobile	Happy	en	happy	Positive	App Store	0	0	0
App Store	70a5af54-6e2d-47f3-85f2-64b11dbd903e	Kausar Qasmi	4/6/23 9:10	Excellent				en	sa	sab-mobile	Very o	en		Neutral	App Store	0	0	0
App Store	800f4b81-4cb7-489d-90dc-6d76f128c225	Nabil Constantin	7/5/22 7:17	Nabil C.				en	sa	sab-mobile	Very pleased	en	please	Positive	App Store	1	0	0
App Store	cb40e2c6-52e9-43dc-b850-311354a027a8	basha ali	6/1/23 4:03	good				en	sa	sab-mobile	exactly good	en	exactly good	Positive	App Store	0	0	0
App Store	e558bcec-68f1-4613-b943-54743c7c11e7	Ammar Al-ansari	6/14/23 20:31	Thankful				en	sa	sab-mobile	SAB support in KSA	en	sab support ksa	Neutral	App Store	0	1	0
App Store	6431a01a-8624-493a-a5a4-13d11cb8816f	Ashu 111	11/27/22 4:14	Excellent				en	sa	sab-mobile	Thanks SABB	en	thank sabb	Positive	App Store	0	0	0
App Store	4b113b8e-494e-4750-b0aa-5c757dc608aa	Siddusha	5/29/23 19:28	good				en	sa	sab-mobile	good to use	en	good use	Positive	App Store	0	0	0
App Store	bc74fd0a-571c-4e2f-b658-26ee88fcf6fc	ابو غمزتين	7/18/23 0:16	very good				en	sa	sab-mobile	awesome appa	en	awesome appa	Positive	App Store	0	0	0
App Store	33a9c5eb-0d55-4f5e-be09-af530e91d71a	سھسنسن	6/6/23 4:56	Muhammad Usman Rehmani				en	sa	sab-mobile	Was good	en	good	Positive	App Store	0	0	0
App Store	b4adff32-38e5-44bc-ae8e-2865c7bbe530	Dia191960	4/28/23 10:49	Mr Dheya				en	sa	sab-mobile	Thanks to SAB MOBILE	en	thank sab mobile	Positive	App Store	0	0	0
App Store	fe4c70be-643e-446e-ad49-84ceda047c3d	Kazoma	7/9/23 17:32	Good				en	sa	sab-mobile	Goos app	so	goos app	Neutral	App Store	0	0	0
App Store	d263454d-83bd-4845-8ec8-f5172ab20c48	sumair patel	11/9/22 15:00	Sabb app not working				en	sa	sab-mobile	sabb is not working	en	sabb work	Negative	App Store	0	1	0
App Store	113e3195-6200-46dc-a161-e814eef2e0c2	Charger Al Hemi	9/6/23 5:38	The First SABB				en	sa	sab-mobile	Best of the best	en	best best	Positive	App Store	0	0	0
App Store	2577fbef-cb5d-456e-a018-70ff0557c138	Sparkyclark	4/6/23 11:55	From SABB to SAB				en	sa	sab-mobile	The SAB app doesnât work. Useless!!	en	sab app doesnt work useless	Negative	App Store	1	1	0
App Store	4307d90a-a760-497e-acf4-7fdcb344efa4	Wesam Abu Sami	5/4/22 13:56	It’s OK				en	sa	sab-mobile	Itâs OK	en	ok	Neutral	App Store	0	0	0
App Store	c2c88807-f4d9-46d1-9339-57758465453d	Kavanal Aby	5/31/22 10:30	Aby Kavanal				en	sa	sab-mobile	Thomas	en	thomas	Neutral	App Store	0	1	0
App Store	c3a8c77b-c77f-40fa-bf0d-c2d18b6b4c64	Bushra-Hameed	3/20/23 13:35	Love				en	sa	sab-mobile	Love	en	love	Positive	App Store	0	0	0
App Store	23481d60-12a1-40e7-b2a0-44895ebd12be	g thadi	4/9/23 2:00	MR				en	sa	sab-mobile	Perfect Banking ever in KSA	en	perfect bank ever ksa	Positive	App Store	0	0	0
App Store	61c4f840-fcc2-4c3c-badd-60240a2f284b	Aju Manneth	2/7/23 18:53	Good				en	sa	sab-mobile	No 1	en		Neutral	App Store	0	0	0
App Store	0a9ff397-3e47-4814-882c-8ddc04a2519e	Dr Mohamed abdelwahed	5/26/23 21:51	Dr Mohamed abdelwahed				en	sa	sab-mobile	V good	en	v good	Positive	App Store	0	0	0
App Store	3694455f-b31d-4bdf-be96-54ac4f6e23d0	heroxgf	2/19/23 6:16	Jacob				en	sa	sab-mobile	Awsome	en	awsome	Positive	App Store	1	0	0
App Store	b54357fe-6570-4e2a-882e-dbc567dca296	tennisan jayasekara	11/13/22 11:27	Ok good				en	sa	sab-mobile	Ok good	en	ok good	Positive	App Store	0	0	0
App Store	3dc9caac-11fb-49a8-9cf6-43c89cdff71e	Ezhilpoonguzhali	3/14/22 6:44	Mrs				en	sa	sab-mobile	Ezhilpoonguzhali	ny	ezhilpoonguzhali	Neutral	App Store	0	0	0
App Store	cebb5d97-b547-4097-ab98-d42bb1e659b1	Hammad.ahmad1854	9/7/22 11:05	Hammy				en	sa	sab-mobile	Awesome	en	awesome	Positive	App Store	0	0	0
App Store	9d9e117a-114f-4764-990c-559a83de5c0f	aialfayez	8/16/23 12:13	Good				en	sa	sab-mobile	Itâs good app.	en	good app	Positive	App Store	0	0	0
App Store	601fdce2-44b9-410f-964f-c2d4427e44fa	HBG Baig	4/6/23 8:31	⭐️⭐️⭐️⭐️⭐️				en	sa	sab-mobile	Good oneâ¦.	en	good one	Positive	App Store	0	0	0
App Store	4e69359d-90d6-4eeb-af2c-c20d6ef14fe7	ayman aboutaleb12	12/19/22 8:14	Mr				en	sa	sab-mobile	I'm sorry, but "Ayman aboutaleb12" does not make sense in Arabic. It appears to be a name followed by numbers. Can you please provide the Arabic text you would like translated?	ar	im sorry ayman aboutaleb make sense arabic appear name follow number please provide arabic text would like translate	Negative	App Store	1	1	0
App Store	b13a62a4-3f75-4835-8f85-045f433e8c1e	Hulk TJ	8/11/22 15:20	Love it				en	sa	sab-mobile	Prefect â¤ï¸â¤ï¸â¤ï¸â¤ï¸â¤ï¸â¤ï¸â¤ï¸â¤ï¸	en	prefect	Positive	App Store	0	0	0
App Store	c88d9911-c8c7-43a1-8c33-d38d8e91c519	الفراشه الورديه	12/2/22 2:52	Sabb apps				en	sa	sab-mobile	Very satisfied	ar	satisfy	Positive	App Store	0	0	0
App Store	efe2ac10-a215-4b4e-a2e5-060cb189c1ff	Tamim3	6/25/23 6:36	Tanks				en	sa	sab-mobile	BT	en	bt	Neutral	App Store	0	0	0
App Store	1dc7c28a-b788-4aa1-ba00-91ae1f80427c	shaikabdul	9/9/22 16:36	Mr				en	sa	sab-mobile	Shaima	ha	shaima	Neutral	App Store	0	0	0
App Store	329a23e4-98bf-4dbc-8b2d-4baa3d9d5e58	RIYAS2122	7/8/22 21:28	SABB				en	sa	sab-mobile	ITS VERY EASILY USEFULL APLICATION	en	easily usefull aplication	Positive	App Store	0	0	0
App Store	fbfe54a8-1de3-4e1d-a5e1-9068dd86a88d	Awais5707	6/6/23 4:15	Ok				en	sa	sab-mobile	Okk	is	okk	Neutral	App Store	0	0	0
App Store	1555e1dc-af50-4085-b5f1-132c0b70cc6d	Kkz2022	11/24/22 4:26	Kkkz				en	sa	sab-mobile	Kkkz	ceb	kkkz	Neutral	App Store	0	0	0
App Store	ffe4b550-8e1a-456b-a350-c0748b4cc8d2	badeooo15	8/11/23 22:53	ممتاز				en	sa	sab-mobile	Smart.	ar	smart	Neutral	App Store	0	0	0
App Store	1055e87b-0c8c-45ad-b628-8f6efa0e8ade	مصطفى / الرياض	9/2/22 12:13	بجنن				en	sa	sab-mobile	Sweet.	ar	sweet	Positive	App Store	0	0	0
App Store	ca3ea57d-e016-4c01-99fb-f6ff0d434e98	Rmkkkkk	9/19/23 16:24	سهل الاستخدام				en	sa	sab-mobile	Easy	ar	easy	Positive	App Store	0	0	0
App Store	c4d38b3c-a520-4576-b541-64ca7b3b72e5	frowaili	9/15/23 12:48	اطلق برنامج في البنوك السعودية وبلا منازع				en	sa	sab-mobile	Launched a program in Saudi banks, unrivaled.	ar	launch program saudi bank unrivaled	Neutral	App Store	1	0	0
App Store	5cddddc1-6349-4c0d-a179-7f3f0922b3d3	Qasim essa	9/11/23 5:48	الافضل بلا منازع				en	sa	sab-mobile	One of the best and easiest banks for privacy.	ar	one best easy bank privacy	Positive	App Store	0	0	0
App Store	c535198a-46e7-4c3a-95dc-19196650e6d8	Khfhggjgvvv1260	9/11/23 10:19	سيء				en	sa	sab-mobile	Bad .. Heavy to navigate .. The application interface is bad. Using Face ID for login is pointless (because it still asks for the username and password).	ar	bad heavy navigate application interface bad use face id login pointless still ask username password	Negative	App Store	1	0	1
App Store	a102c9ed-edf8-426f-bed6-d25557d2aae4	Saleemm13	9/9/23 17:16	نحتاج سرعه في التطبيق اكثر				en	sa	sab-mobile	We need to activate the (token application) service for login and transfer using a dedicated application instead of a token device.	ar	need activate token application service login transfer use dedicate application instead token device	Neutral	App Store	0	0	0
App Store	77fc961c-f77b-4608-9ba8-6f92f34e36f7	Jhonecooper	9/7/23 13:17	تطبيق ممتاز				en	sa	sab-mobile	The best bank application	ar	best bank application	Positive	App Store	0	0	0
App Store	86bf6dfc-ddef-4b08-a4a6-f9decb5b5f47	HASAN ALDAWAA	9/2/23 12:41	ممتاز ولكن يحتاج بعض اللمسات				en	sa	sab-mobile	Why do we have to write the code? Let it be automatic like before.	ar	write code let automatic like	Negative	App Store	0	1	0
App Store	cd2112f0-aa4a-4bc7-82d6-f9aa8323094c	🌹wafaa	9/3/23 11:29	ممتاز ⭐️⭐️⭐️⭐️⭐️				en	sa	sab-mobile	I have been a customer with them for years, but I will say "forever" when it comes to Omar Bank. The service and treatment are truly excellent, and I don't think I will ever consider changing banks. I have never faced any problems while travelling using my card. I have dealt with other banks before, but I didn't stay with them for long. I have a few small suggestions and recommendations that I ho…	ar	customer years say forever come omar bank service treatment truly excellent dont think ever consider change bank never face problems travel use card deal bank didnt stay long small suggestions recommendations hope see sap bank department senior citizens tolerate wait special treatment loyal customers even lose money come back loyal customers dont change anything card service department chair unco…	Positive	App Store	1	0	0
App Store	7eae2f26-75ea-43fb-afb5-0b7983a1a34d	Hammadi2011	8/31/23 12:09	Alahssa				en	sa	sab-mobile	The application services are excellent.	ar	application service excellent	Positive	App Store	0	0	0
App Store	696dc615-1658-43d5-9efb-f8b6aace4c5e	خسكي	8/30/23 5:38	الرياض				en	sa	sab-mobile	Excellent dealing with the application.	ar	excellent deal application	Positive	App Store	0	0	0
App Store	4c9ce814-8d61-4716-86d7-9416af5311c1	Shotagi	8/30/23 7:28	جيد				en	sa	sab-mobile	Good, but it needs to be faster when transitioning from one interface to another.	ar	good need fast transition one interface another	Neutral	App Store	1	0	0
App Store	e2436fbf-03f8-4622-a6de-119cc6711b86	Alyami	8/27/23 7:25	التطبيق ممتاز				en	sa	sab-mobile	The application is excellent at the moment, but sometimes, especially after updates, it has some flaws and bugs. However, it is currently excellent, and the comment will be updated whenever necessary.	ar	application excellent moment sometimes especially update flaw bug however currently excellent comment update whenever necessary	Positive	App Store	1	1	0
App Store	26422d65-e6db-4f2d-966e-8225a4ae030e	gold1406	8/27/23 4:36	فعلا يطلق عليه اسم بنك				en	sa	sab-mobile	This is what is said about you, a bank. As for the others, they are financial institutions.ð	ar	say bank others financial institutions	Neutral	App Store	1	0	0
App Store	c2fd7e0c-b9a5-4ca9-bd4c-fbbb5d63b42b	AlQuniabut	8/25/23 13:21	واجه متميزه				en	sa	sab-mobile	The application is criticized for being slow during use and when navigating between services, in addition to frequent app crashes and updates.	ar	application criticize slow use navigate service addition frequent app crash update	Negative	App Store	1	1	1
App Store	04c4daf3-9708-444c-b0a5-67a60a39bb98	3DEL MANSI	8/24/23 5:26	اطلق بنك و اطلق تطبيق				en	sa	sab-mobile	The bank has launched and the application has been released.	ar	bank launch application release	Neutral	App Store	0	1	0
App Store	4853351e-1c31-4379-8844-fe07c3f221a6	Amoory1402	8/22/23 7:26	تطبيق				en	sa	sab-mobile	When the application opens, it hangs and opens two pages one after the other.	ar	application open hang open two page one	Neutral	App Store	0	1	1
App Store	375e495c-9ab6-4af2-8991-6d134c9e6007	Fajer8888	8/16/23 0:55	الافضل				en	sa	sab-mobile	The best bank.	ar	best bank	Positive	App Store	0	0	0
App Store	5208e65b-dc00-4de9-b593-3f9e53f7c857	محب سعد الغامدي في الله	8/20/23 9:21	التحديث الاخير				en	sa	sab-mobile	"The application no longer works with the latest update from Apple."	ar	application long work late update apple	Negative	App Store	0	1	0
App Store	0b9a06bf-1381-4bae-94ea-f05fb8f2be5f	Ranyah20	8/15/23 23:45	تطبيق سهل التعامل ومريح				en	sa	sab-mobile	"I find the application convenient as I can do all my transactions through it. It is simple, clear, and easy. Thank you, the first."	ar	find application convenient transactions simple clear easy thank first	Positive	App Store	0	0	0
App Store	6458bcd0-6663-418a-94a7-393b9b1add6d	عطر الليل	8/14/23 16:40	تقديم الى الامام				en	sa	sab-mobile	Excellent and wider options than before, thank you for the effort.	ar	excellent wide options thank effort	Positive	App Store	0	0	0
App Store	6018e134-6b01-404e-870e-bc8d04d67ece	MuniDub	8/13/23 6:24	Best bank ever				en	sa	sab-mobile	Best bank ever	und	best bank ever	Positive	App Store	0	0	0
App Store	4d71c662-9be7-47d0-af31-9f8158a41a3e	S. Director	8/9/23 0:43	تطبيق جيد يسهل المهام ولكن هناك مشكلة في ايقونة الشكاوي				en	sa	sab-mobile	Good application that simplifies tasks, but there is a problem with the complaints icon.	ar	good application simplify task problem complaints icon	Negative	App Store	1	0	0
App Store	e2c280f6-346d-43f2-b356-bf0869116921	wael aboud	8/1/23 14:33	رائع				en	sa	sab-mobile	The best banking app I have ever used.	ar	best bank app ever use	Positive	App Store	0	0	0
App Store	72bdc08b-8bd7-434d-94a4-e21226e16ccd	محمد فهد عبدالرحمن	7/29/23 3:15	واو				en	sa	sab-mobile	Amazing	ar	amaze	Positive	App Store	0	0	0
App Store	6da5cab1-a65c-4372-b823-eb4e18e2bab2	الللعنننا	7/28/23 10:26	تجربة رائعة				en	sa	sab-mobile	wonderful experience	ar	wonderful experience	Positive	App Store	0	0	0
App Store	9484e132-26c2-4015-a100-a1d5913a85d5	kbsradah	7/27/23 13:47	تحسين فتح حساب من التطبيق بدل زياره الفرع				en	sa	sab-mobile	Please add the ability to open a new account as I cannot open another account from my current one.	ar	please add ability open new account open another account current one	Neutral	App Store	0	1	0
App Store	b44c1eda-466f-4839-b9ad-d1e5856451a1	aboosamh100	7/27/23 11:05	تقييم التطبيق				en	sa	sab-mobile	A fantastic application and the online banking service is exceptional and fast.	ar	fantastic application online bank service exceptional fast	Positive	App Store	0	0	0
App Store	f437a4a3-eafa-46b2-9353-092f91e3f8e6	Nahar711	7/26/23 17:01	تطبيق رائع جدًا				en	sa	sab-mobile	A very wonderful application.	ar	wonderful application	Positive	App Store	0	0	0
App Store	6b0d73b8-87a4-4301-bfd5-7e1d0de53a0e	Mans699	7/27/23 2:41	بنك ساب				en	sa	sab-mobile	Why are the monthly payment bills not showing up in the application anymore? Please solve the problem. Thank you.	ar	monthly payment bill show application anymore please solve problem thank	Negative	App Store	0	1	0
App Store	33726d6e-33d6-45bf-ae6a-89f208593075	المغاترة	7/25/23 13:09	القصيم				en	sa	sab-mobile	Thank you.	ar	thank	Positive	App Store	0	0	0
App Store	9c3652ec-d7ae-4278-ae17-53bdacab62ad	وديان الرياض	7/22/23 20:29	التقيم للتطبيق جدا رائع				en	sa	sab-mobile	And its services are diverse and efficient.	ar	service diverse efficient	Positive	App Store	0	0	0
App Store	7930f182-e31c-4e52-96e2-8e92886a4f60	Thufail Sahil	7/19/23 8:29	Best app				en	sa	sab-mobile	Best mobile banking app	en	best mobile bank app	Positive	App Store	0	0	0
App Store	f2658119-4143-4290-9656-4d8f331f39a2	liezlcb	7/18/23 12:12	Excellent !				en	sa	sab-mobile	Good job	en	good job	Positive	App Store	0	0	0
App Store	d963fbc1-1725-4f79-82b4-0892a5c1a01b	افضل تطبيق دايمن يتحدث	7/17/23 23:46	ساب				en	sa	sab-mobile	A beautiful application but it needs development like Al Rajhi.	ar	beautiful application need development like al rajhi	Positive	App Store	1	0	0
App Store	009bfdfa-f5b3-4c13-8c87-5d6f2087f48a	ابراهيم محي الدين	7/16/23 17:18	تطبيق متميز				en	sa	sab-mobile	The first bank with efficiency and eligibility.	ar	first bank efficiency eligibility	Positive	App Store	1	0	0
App Store	b52a2dc9-f182-40a8-8542-80e5165c99c6	Am581273	7/16/23 1:36	ممتاز 🤩				en	sa	sab-mobile	Sweet and easy to use.	ar	sweet easy use	Positive	App Store	0	0	0
App Store	afb96b64-c417-4fb9-b89a-3faad4534df0	M0TI0N	7/16/23 9:03	ممتاز ولكن				en	sa	sab-mobile	The application is excellent and I thank you for your efforts in developing it. However, there have been technical problems with logging in for some time now, and it is difficult to access the application. I hope you can fix the issue urgently. Thank you and appreciated.	ar	application excellent thank efforts develop however technical problems log time difficult access application hope fix issue urgently thank appreciate	Positive	App Store	1	1	0
App Store	9a5c880a-b076-44fd-81e7-6554fecc34e2	Dr.toot	7/16/23 7:42	تم الغاء خاصية الاطلاع على الاميال المكتسبة				en	sa	sab-mobile	The feature of accessing the accumulated miles has been cancelled.	ar	feature access accumulate miles cancel	Negative	App Store	0	1	0
App Store	5dc0a7d5-a91c-49d5-9e0e-7d06ae3f1009	Top Speed SA	7/15/23 13:12	مشكله في التحويل لحساب اخر في ساب				en	sa	sab-mobile	I am unable to make a transfer to another account in Saib. Please fix the application.	ar	unable make transfer another account saib please fix application	Negative	App Store	0	1	0
App Store	6fcca110-ec68-4a7a-8650-958dc6ffe44e	al.wajih	7/10/23 21:22	شكرًا لكم				en	sa	sab-mobile	A smooth and wonderful application that saves time and achieves my goals.	ar	smooth wonderful application save time achieve goals	Positive	App Store	0	0	0
App Store	7e9608c5-b30c-4a00-9543-c73262676e17	السعيدي م	7/14/23 7:07	التطبيق سيء				en	sa	sab-mobile	The truth is that the services in the application are distinctive compared to other banks, but we aspire to be the best without any errors. There are some issues with the application: 1. The investment accounts are mixed together and cannot be changed or modified, even if you make changes, they are not implemented accurately. 2. There are many canceled cards among the Mada cards list, causing con…	ar	truth service application distinctive compare bank aspire best without errors issue application investment account mix together change modify even make change implement accurately many cancel card among mada card list cause confusion customer complaint options limit often serve purpose waste customers time time take receive otp onetime password short sometimes customer abroad message delay suppos…	Negative	App Store	1	1	1
App Store	d8deff29-395a-457d-8585-6c05de4cbee3	عاشق ديرتي	7/13/23 10:56	الرياض				en	sa	sab-mobile	Al-Qairawan	ar	alqairawan	Neutral	App Store	0	0	0
App Store	a09ba042-7d17-4986-a745-c346ac50984f	uszqps12	7/13/23 8:43	اسوء تطبيق				en	sa	sab-mobile	The worst bank.	ar	bad bank	Negative	App Store	1	0	0
App Store	263d7694-7649-4447-93f3-1382fc20b750	Abo knaan	7/12/23 16:39	ضعيف في تسجيل الدخول				en	sa	sab-mobile	I hope that the working brothers on it will accelerate the solution to the problem.	ar	hope work brothers accelerate solution problem	Positive	App Store	0	1	0
App Store	2bad0213-82ec-41df-a561-7553f54fb801	Kdahnim	7/12/23 15:47	التطبيق سيء				en	sa	sab-mobile	The application has been failing and experiencing many malfunctions recently.	ar	application fail experience many malfunction recently	Negative	App Store	1	1	0
App Store	057fc9ed-2f98-4f0e-8a4b-c559d4cabaf1	 ابو محمد	7/10/23 16:47	ممتاز				en	sa	sab-mobile	Very wonderful	ar	wonderful	Positive	App Store	0	0	0
App Store	08c96ced-b46e-43d4-8e04-56f95e437aa7	Sa'fare	7/10/23 8:22	Best user friendly				en	sa	sab-mobile	Best so farâ¦	en	best far	Positive	App Store	0	0	0
App Store	f58e4b7e-c961-4012-98c7-761ee65fe21c	تذرريررردد	7/10/23 7:32	👍🏻				en	sa	sab-mobile	Well done	ar	well do	Positive	App Store	0	0	0
App Store	e79d283b-ecc0-4f79-aaf4-7151246b5b0f	Faris Shaker	7/9/23 8:16	بنك مميز جداً				en	sa	sab-mobile	"I have been dealing with banks for 30 years and have not found anything better than SABB and ZAD in terms of excellence."	ar	deal bank years find anything good sabb zad term excellence	Positive	App Store	1	0	0
App Store	e895b60e-9f86-470d-a916-687f8c21680d	Ahmed Ali Ezzat	7/7/23 10:31	Easy and clear app 👌				en	sa	sab-mobile	The application is easy and convenient.. but when making a transfer to someone who is not added, please provide the option to add a new beneficiary before entering the amounts and accounts, as we have to re-enter this information again after adding a new beneficiary.	ar	application easy convenient make transfer someone add please provide option add new beneficiary enter amount account reenter information add new beneficiary	Neutral	App Store	0	1	0
App Store	73eeb222-7530-4566-bd9c-0eb5d34e87bd	dhri847!	7/6/23 13:21	مشكله في اكواد العمليات				en	sa	sab-mobile	Please correct the process so that the code number comes automatically when entering numbers and please make the password a short number for login.	ar	please correct process code number come automatically enter number please make password short number login	Neutral	App Store	0	1	0
App Store	53d0b2d1-2ce2-4027-864a-72d6b805aed0	Ahmed Yara	7/5/23 20:47	افضل بنك بالعالم				en	sa	sab-mobile	The best employees in the world, may Bank SAAB give you a thousand blessings.	ar	best employees world may bank saab give thousand blessings	Positive	App Store	0	0	0
App Store	f71f48b4-b426-4fbb-a379-b5275db00fde	عزيزه حمد	7/5/23 10:16	التطبيق اصبح اكثر سلالة				en	sa	sab-mobile	You can transfer, complete many tasks, excellent application.	ar	transfer complete many task excellent application	Positive	App Store	0	1	0
App Store	eec07c9e-83dc-4fd2-9b1c-860cac900b12	Mutamem	7/3/23 8:29	Nice update				en	sa	sab-mobile	Nice update	und	nice update	Positive	App Store	0	0	0
App Store	18a4f4a3-7842-4e88-9919-d732500ce839	Mahnoud fayed	6/30/23 15:19	ممتاز				en	sa	sab-mobile	Excellent application, but it requires location to use the application... annoying.	ar	excellent application require location use application annoy	Negative	App Store	1	0	0
App Store	5218481b-3a94-4839-aacb-84119821e036	nziz	7/1/23 22:30	لا يعمل بكفاءة				en	sa	sab-mobile	In travel, both Al-Raddah and Al-Rajhi are competing.	ar	travel alraddah alrajhi compete	Neutral	App Store	0	1	0
App Store	9922afed-f6ff-4fac-a8d4-8012ba669ff7	ل.ف.ف	6/28/23 19:16	رهيب				en	sa	sab-mobile	The application is excellent, everything is organized and it never crashes.	ar	application excellent everything organize never crash	Positive	App Store	1	1	0
App Store	6de79f6e-cca5-4d07-b133-ee0f90bc04a8	Magiclion008	6/27/23 14:38	تطبيق رائع				en	sa	sab-mobile	A very wonderful and smooth application to use and contains everything the user might needð	ar	wonderful smooth application use contain everything user might need	Positive	App Store	0	0	0
App Store	186e75d6-995e-4f87-9936-165fcbc1b220	Alssaher 2010	6/27/23 20:32	جيدجدا				en	sa	sab-mobile	It needs to offer more options that don't force you to go to the branch and request them from there.	ar	need offer options dont force go branch request	Neutral	App Store	0	1	0
App Store	b773bbcc-b859-4e9f-b136-9ee3c4ac1973	FaisaL AL FaisaL	6/27/23 13:45	ممتاز				en	sa	sab-mobile	Excellent and easy to use program	ar	excellent easy use program	Positive	App Store	0	0	0
App Store	f8a68149-9abd-4c0b-aeb6-f0dbf64568c8	aloool-311	6/26/23 19:44	بنك مميز جداً				en	sa	sab-mobile	A very distinguished bank that includes an elite group of bank employees at the highest level of service.	ar	distinguish bank include elite group bank employees high level service	Positive	App Store	1	0	0
App Store	91f6ffad-3037-4c45-b955-f6d0f4dc6284	أبو فهود	6/26/23 9:49	تحويل				en	sa	sab-mobile	The transfers were easy and successful thanks to Sab Alawal.	ar	transfer easy successful thank sab alawal	Positive	App Store	0	0	0
App Store	050ce8f0-4d47-41c4-a8a6-e80fd7ba46fe	Saleh Almutairi1	6/25/23 15:30	ممتاز				en	sa	sab-mobile	Wonderful	ar	wonderful	Positive	App Store	0	0	0
App Store	6127e890-e342-425f-a9b3-9d687b4534f7	أبوعبدالله التميمي	6/25/23 23:25	ا				en	sa	sab-mobile	Nice	ar	nice	Positive	App Store	0	0	0
App Store	1cedb682-be89-43ac-bc61-67c94c9deb71	الديمورانسي	6/25/23 13:56	تحديثات جميلة				en	sa	sab-mobile	Previously, the worst banking program, but now with updates, developments, and renewals, it has become much easier and smoother. ðð¼ðð¼ðð¼	ar	previously bad bank program update developments renewals become much easy smooth	Negative	App Store	1	0	0
App Store	965017bc-4255-416b-9101-d3cc984bde3c	biijay	6/23/23 17:24	Excellent service				en	sa	sab-mobile	Proving excellent service.	en	prove excellent service	Positive	App Store	0	0	0
App Store	2acd3bb1-f7c1-4163-a826-3ad3567b9c48	dysgcjh	6/25/23 10:22	لا بارك الله في تطبيقكم				en	sa	sab-mobile	Every day before payday, I have to update the SAP Banks application, but there's nothing new. Just a waste of time. May God keep you all busy with yourselves. They've added a thousand ways to verify and check, it's better for me to go to the bank or keep trying different methods. Those who have the application, leave the bread to the baker and don't bother with others. I don't have time to update…	ar	every day payday update sap bank application theres nothing new waste time may god keep busy theyve add thousand ways verify check good go bank keep try different methods application leave bread baker dont bother others dont time update twelve time year hopefully offer exceptional service	Negative	App Store	1	1	0
App Store	19fbb235-6dd6-47a8-bb12-e1b1ed5dbca7	abuabuldalazez	6/24/23 19:37	الرياض				en	sa	sab-mobile	Excellent, one of the best banks.	ar	excellent one best bank	Positive	App Store	0	0	0
App Store	8f38f2a1-a2ee-4b80-b0fc-535668bbdebd	Sn!6er	6/21/23 19:07	تطبيق متطور وسابق اغلب تطبيقات البنوك (اقتراح)				en	sa	sab-mobile	Excellent application. But I suggest improving the tagging feature and the 360 feature as follows: 1- It should be possible to add tags when reviewing transactions from the transaction report, rather than from within the tags themselves, to make it easier and more practical. 2- There should be a selection of the period for the 360 reports feature. This way, the customer can specify the period fro…	ar	excellent application suggest improve tag feature feature follow possible add tag review transactions transaction report rather within tag make easy practical selection period report feature way customer specify period date salary payment usually th th month next salary payment date allow customer good monitor monthly budget best regard	Positive	App Store	1	1	0
App Store	1ffb1d01-9833-4ae8-a969-3c54d5dfe928	docguy88	6/17/23 19:34	رائع				en	sa	sab-mobile	Honestly, it is a wonderful application and easy to use. Tremendous effort.	ar	honestly wonderful application easy use tremendous effort	Positive	App Store	0	0	0
App Store	8d3236c0-7b1d-426c-9a0a-8a12ab54bcf3	fmsf1414	6/19/23 9:34	التحسين المستمر				en	sa	sab-mobile	Thank you for your continuous improvement. We would like the application to be faster and compete with other banks.	ar	thank continuous improvement would like application fast compete bank	Positive	App Store	0	0	0
App Store	3d5bf8a6-ee40-47c0-b750-209ec6dea5a2	Isml73	6/12/23 18:28	ساب جميل				en	sa	sab-mobile	A wonderful, easy, and useful application.	ar	wonderful easy useful application	Positive	App Store	0	0	0
App Store	40360c35-f1f1-4901-ae1a-19886779b000	lepord_911	6/6/23 15:26	Great job				en	sa	sab-mobile	Great job SAB	en	great job sab	Positive	App Store	0	0	0
App Store	dba640de-2d7c-43ff-8377-4b89a3759871	gmalrashed	6/9/23 13:33	رأي				en	sa	sab-mobile	A multitude of options are available to you, but they require further organization.	ar	multitude options available require organization	Neutral	App Store	1	0	0
App Store	a63f0ce5-3c85-4795-ae84-d2d70807fb4e	ابو ليال	6/9/23 10:27	جيد				en	sa	sab-mobile	The application is good, but it needs further development.	ar	application good need development	Positive	App Store	1	0	0
App Store	727f2182-1de4-4959-b577-a5f657fd2744	smoxxxx	6/7/23 8:19	تطبيق بطىء				en	sa	sab-mobile	The application is slow in banking transactions and when opened, it automatically exits from the application. It has been updated to the latest version, but even when opening the account from the official website, there are also problems in inquiring about invoices, they do not appear. We request an update for a better application than that.	ar	application slow bank transactions open automatically exit application update late version even open account official website also problems inquire invoice appear request update good application	Negative	App Store	0	1	1
App Store	88bf06ff-87b3-4a9c-badd-b9fc81e9a251	Riri5551	6/7/23 8:06	دايم خلل فني				en	sa	sab-mobile	Why does the program always deactivate/cancel my card?	ar	program always deactivatecancel card	Negative	App Store	0	1	0
App Store	45ec9e3d-0c02-4cb3-a8f2-167282d0a289	حمزه العشاري	6/4/23 18:41	والله سكرتو ملف الراجحي				en	sa	sab-mobile	You win.	ar	win	Positive	App Store	0	1	0
App Store	875b0393-8682-4c68-8f5a-a49c7626b1ba	Ibrahim9011	6/5/23 19:13	سيء				en	sa	sab-mobile	Always freezes on the Xp points page.	ar	always freeze xp point page	Negative	App Store	0	0	1
App Store	f1d51b10-9562-4393-b101-32154275970d	Miatham	6/4/23 13:56	ممتاز				en	sa	sab-mobile	Fast, easy, and comprehensive services that work well.	ar	fast easy comprehensive service work well	Positive	App Store	0	0	0
App Store	0ba6d1d4-0c30-4492-9210-df8984992b83	Hvvhzx	6/3/23 18:07	التطبيق				en	sa	sab-mobile	Very easy and smooth.	ar	easy smooth	Positive	App Store	0	0	0
App Store	aa417254-7747-471f-9121-0f51f5036e1b	M.A.Haleem	6/3/23 9:13	Best mobile banking app				en	sa	sab-mobile	Best mobile banking app ever	en	best mobile bank app ever	Positive	App Store	0	0	0
App Store	aa9e0f5a-13f5-40d9-8de4-d196407880e2	Rne.sharp	5/29/23 12:31	التجربه جيداً ولكن…				en	sa	sab-mobile	Honestly, the new modifications are nice and have nice features, but there is a delay in updating. For example, there is a violation that has not been settled and in reality, there is no option to choose a card, but it shows me information about another card.	ar	honestly new modifications nice nice feature delay update example violation settle reality option choose card show information another card	Negative	App Store	1	1	1
App Store	c04ddb84-6c5e-4083-b172-b7528c3d8b02	aswihri	5/24/23 8:08	ممتاز ولكن ينقصه شي واحد فقط				en	sa	sab-mobile	Login is required every time the password is requested. I believe it would be better if the login process is faster than that.	ar	login require every time password request believe would good login process fast	Neutral	App Store	0	0	0
App Store	b008db02-8a4a-4bf7-8714-b49b9c5dabab	mhmd3424	5/22/23 8:23	جيد				en	sa	sab-mobile	The writing must be in dark black or in a distinct different color.	ar	write must dark black distinct different color	Neutral	App Store	1	0	0
App Store	9deaf45e-7616-4fe0-b3ba-458e4c7b6b99	حسن عبدالله الرويلي	5/20/23 16:49	الرياض				en	sa	sab-mobile	A very excellent, easy, and secure program. May it grant you good health.	ar	excellent easy secure program may grant good health	Positive	App Store	1	0	0
App Store	eae673f0-d835-4cbf-b8f6-78c6e974fa81	مون فهد	5/14/23 4:47	واضح				en	sa	sab-mobile	Very smooth, easy, and clear.	ar	smooth easy clear	Positive	App Store	0	0	0
App Store	27e3cafe-6f3e-4903-ad54-92601f409c2d	Zahrag12	5/14/23 10:21	مشكلة في التطبيق				en	sa	sab-mobile	When I open the application, I receive an error message that says: "Error in the Secure Sockets Layer (SSL) layer Mismatched SSL fingerprint" and the application closes multiple times.	ar	open application receive error message say error secure sockets layer ssl layer mismatch ssl fingerprint application close multiple time	Negative	App Store	0	1	0
App Store	4908ed61-5818-4722-900e-5b5e4f2bc3ae	Mr. No I Ain’t	5/11/23 6:44	مجنون				en	sa	sab-mobile	The King of Saving.	ar	king save	Positive	App Store	0	0	0
App Store	c6c7afde-a004-43fa-be5b-f816aca92bba	XoX111	5/10/23 4:21	التطبيق				en	sa	sab-mobile	"The application is good, but it needs to be a little faster in browsing the app."	ar	application good need little fast browse app	Positive	App Store	1	0	1
App Store	4b2e5efd-5f6c-4cf3-8d85-bd6ea9d16d82	Why name taken	5/7/23 17:21	اضافة بعض الخدمات				en	sa	sab-mobile	The application is excellent and useful, and it would be great to add investment to the application, so that we can monitor our subscription in SABB funds. Salih Al-Zahrani, 0563344567.	ar	application excellent useful would great add investment application monitor subscription sabb fund salih alzahrani	Positive	App Store	0	1	0
App Store	b2b8c4b3-755a-498c-b9ef-74d7477780ac	حمادى العقربي	5/5/23 20:00	الاحساء				en	sa	sab-mobile	I'm sorry, but "Ø§ÙØ¬Ø´Ù" is not a recognized Arabic word or phrase. It may be a misspelling or a slang term that is not commonly used. If you have any other Arabic text that you would like translated, please provide it and I will be happy to assist you.	ar	im sorry recognize arabic word phrase may misspell slang term commonly use arabic text would like translate please provide happy assist	Neutral	App Store	1	1	0
App Store	7da3e0e1-78bb-4ad3-802a-4d0a9ac2a809	ام لموره	5/5/23 18:56	سريع وسهل				en	sa	sab-mobile	Fast and easy.	ar	fast easy	Positive	App Store	0	0	0
App Store	47f0ddc2-e102-44ea-98ab-5632ebae4ea4	MasterChef	5/5/23 5:31	خدمات مالية متكاملة				en	sa	sab-mobile	The best easy and convenient application for financial services procedures.	ar	best easy convenient application financial service procedures	Positive	App Store	0	0	0
App Store	29089adf-3062-4eee-8887-f0827109b82d	LoOoli.7	5/1/23 17:38	Alahsa				en	sa	sab-mobile	Ali	sl	ali	Neutral	App Store	0	0	0
App Store	ee5b7cad-abef-40f9-879e-7464fa0da10d	mussab s	5/1/23 2:19	لا باس				en	sa	sab-mobile	There is no quick login or facial recognition yet.	ar	quick login facial recognition yet	Neutral	App Store	0	1	0
App Store	c32300ce-00c9-40ab-af15-568daffd21e3	Abbas Hazmi	4/28/23 10:10	تطبيق ساب				en	sa	sab-mobile	The application is very nice.	ar	application nice	Positive	App Store	0	0	0
App Store	e4dd44a0-9b5b-4c24-87e2-e6eaeb87603c	محب الجليل	4/23/23 13:48	الرياض كثرو برامج الاستثمار				en	sa	sab-mobile	I have been waiting for this update in the program and thank God for the progress.	ar	wait update program thank god progress	Positive	App Store	0	0	1
App Store	c459f3e8-1c66-43ca-99fa-92200de699f8	Windtalkar	4/18/23 9:27	Best				en	sa	sab-mobile	Fast and Friendly	en	fast friendly	Positive	App Store	0	0	0
App Store	d94b81d0-55d6-4d13-afcc-b6c6a18d1670	MsamerKlif	4/15/23 21:57	ممتاز				en	sa	sab-mobile	Distinguished	ar	distinguish	Neutral	App Store	0	0	0
App Store	6929f594-16da-46b5-825a-0fd7947b99a0	آيـسس	4/17/23 21:04	الاكتتاب				en	sa	sab-mobile	Regarding the subscription, why is there no equivalent to other banks?	ar	regard subscription equivalent bank	Neutral	App Store	1	0	0
App Store	7bffeb51-0691-4e7c-8eda-138afbb99a22	ys_211	4/16/23 0:59	جيد جدا				en	sa	sab-mobile	The application is excellent but it lacks some things like reducing the credit card limit.	ar	application excellent lack things like reduce credit card limit	Neutral	App Store	1	1	0
App Store	8d32022b-50b2-428e-b6a4-3527eb7f86b4	Majed Abu yousef	4/15/23 16:13	تطبيق ممتاز				en	sa	sab-mobile	One of the best Saudi banking applicationsðð».	ar	one best saudi bank applications	Positive	App Store	0	0	0
App Store	fd51bcc9-9db4-4802-aee6-c31618a35abc	Maisana.27	4/13/23 10:31	عميل لدى البنك				en	sa	sab-mobile	The application is excellent ðð¼	ar	application excellent	Positive	App Store	0	0	0
App Store	3af247ed-d02f-4354-bfed-35672ee0e1be	Nader293	4/12/23 20:04	Excellent services				en	sa	sab-mobile	Excellent services	en	excellent service	Positive	App Store	0	0	0
App Store	63849119-58cf-4194-856f-221049cbd3e7	iview1	4/12/23 10:16	مبروك وصول القمة				en	sa	sab-mobile	Undoubtedly, the first one. It has been tested and compared with other local banks, and indeed, SAAB application is the best.	ar	undoubtedly first one test compare local bank indeed saab application best	Positive	App Store	1	0	0
App Store	af0e36b3-09a4-4d25-9b7f-4c5ae2299fc5	ALHABSHI ALI	4/11/23 8:59	برنامج جميل جدا				en	sa	sab-mobile	The best bank and the best program.	ar	best bank best program	Positive	App Store	0	0	0
App Store	2d2c2cfb-5833-4f5d-bbd7-aec01d8a8bce	yousefany	4/9/23 20:41	تقييم				en	sa	sab-mobile	Excellent application from an outstanding bank.	ar	excellent application outstanding bank	Positive	App Store	0	0	0
App Store	b3ada5df-0d51-492f-a0cb-97b15dc60db5	Rasheed T	4/5/23 7:54	Mr				en	sa	sab-mobile	Exalant	pt	exalant	Neutral	App Store	1	0	0
App Store	09272ca5-6805-4d9a-b6ff-84896eccaf4a	maj0555	4/7/23 13:43	التمويل				en	sa	sab-mobile	All banks in Saudi Arabia receive funding through applications, except for the first bank application (SABB).	ar	bank saudi arabia receive fund applications except first bank application sabb	Neutral	App Store	0	1	0
App Store	39a131fb-a4be-4b48-9b5d-66a00a44620f	Reem2628	4/4/23 12:38	النهضه				en	sa	sab-mobile	Riyadh	ar	riyadh	Neutral	App Store	0	0	0
App Store	9c6e2136-eacf-4fcc-90fd-66cdf3d22c13	CharafAMN	4/1/23 16:56	تقييم				en	sa	sab-mobile	A wonderful experience, fast services, easy to deal with, more than excellent, my favorite bank.	ar	wonderful experience fast service easy deal excellent favorite bank	Positive	App Store	0	0	0
App Store	5ca4c95a-bfa4-41fb-9369-2d4eefb10279	mahassan@	3/31/23 21:32	تطبيق جميل وافضل من السابق. شكرا لكم				en	sa	sab-mobile	Excellent, thank you.	ar	excellent thank	Positive	App Store	0	0	0
App Store	4e8056ef-9158-49f7-952f-db6cb7158b95	شكرآ لكم ودمتم بود	3/28/23 13:03	الروابيي				en	sa	sab-mobile	All appreciation and respect go to the leader.	ar	appreciation respect go leader	Positive	App Store	0	0	0
App Store	1c1cf9a1-ec41-47fe-9981-791954ed680a	al1527383	3/27/23 19:36	Amazing				en	sa	sab-mobile	Just be up date	en	date	Neutral	App Store	0	1	0
App Store	34332b13-d8f0-499d-90e3-9be42241791f	MoOony H	3/27/23 18:47	ممتاز				en	sa	sab-mobile	The application is excellent and constantly evolving.	ar	application excellent constantly evolve	Positive	App Store	1	0	0
App Store	2caad8dc-8f39-488f-bcc0-7dd91e29e0f7	zoz hawra	3/27/23 8:23	تطبيق رائع				en	sa	sab-mobile	The best undisputed banking application.	ar	best undisputed bank application	Positive	App Store	0	0	0
App Store	0c025047-f566-42b7-a0e6-ef192484b44e	m.7amd1	3/27/23 13:32	محمد الهاجري الدمام				en	sa	sab-mobile	I wish for an easier way to enter.	ar	wish easy way enter	Neutral	App Store	0	0	0
App Store	c2df2c2f-1f70-41e7-84d4-071151a00816	Ñônÿ	3/27/23 5:30	التطبيق لا يعمل وغير مستقر				en	sa	sab-mobile	The application is not working. No banking transactions can be performed after the latest update.	ar	application work bank transactions perform late update	Negative	App Store	0	1	0
App Store	b1dd5aee-a302-4346-a88a-fd5e91dcd66f	zakryaaaa	3/25/23 20:17	ساب موبايل				en	sa	sab-mobile	ð acceptable	fa	acceptable	Neutral	App Store	1	0	0
App Store	c32830f1-44f9-4cce-886d-af07ab90cb7c	smemees	3/25/23 1:40	👍				en	sa	sab-mobile	It is nice, but there should be a quick button press where I can submit a complaint in case of technical problems (which have occurred more than once, but due to the complicated customer service communication system of SAP, I haven't been able to submit a complaint).	ar	nice quick button press submit complaint case technical problems occur due complicate customer service communication system sap havent able submit complaint	Neutral	App Store	1	1	0
App Store	90ceb5a7-9a16-4897-8897-381a1a9e5626	ابراهيم ابوساعي	3/24/23 6:22	متقاعد				en	sa	sab-mobile	"Shoes are extremely easy and clear. May Allah reward everyone who contributed to this easy service."	ar	shoe extremely easy clear may allah reward everyone contribute easy service	Positive	App Store	1	0	0
App Store	4402d7d8-e9e4-4e63-8bd5-18f049a5bc6a	Mohanvjskznsnk	3/23/23 10:05	تحسينات مقترحه				en	sa	sab-mobile	The application is nice, but it needs necessary improvements, especially regarding budgeting and expenses in the 360 service. 1- Any transaction outside of payments, such as transfers, should not be counted, and there should be an option for the customer if they wish to include them. However, it should not be the default. 2- A separate section should be added for transactions made abroad during t…	ar	application nice need necessary improvements especially regard budget expense service transaction outside payments transfer count option customer wish include however default separate section add transactions make abroad travel categorize base currency service enable customer track financial expense trip separate report great bank interest provide appropriate service enable customers manage accou…	Neutral	App Store	1	1	0
App Store	8f3cded9-9ff5-4eb5-9585-d784cac358ed	صاحي لهم - النادي اللياقي	3/20/23 14:57	خدمات ساب مميزه				en	sa	sab-mobile	From good to better, I advise all customers to use SAP Mobile and I wish you all the best.	ar	good good advise customers use sap mobile wish best	Positive	App Store	0	0	0
App Store	b0861bdf-1ec7-4e59-9973-ded1bf1aea86	Zero cool-1	3/20/23 12:46	افضل تطبيق				en	sa	sab-mobile	The best.	ar	best	Positive	App Store	0	0	0
App Store	7f21e82d-5a58-4bfa-8ceb-f6cb7da64f61	mkhayal	3/19/23 16:50	خدمة اكثر من ممتازة				en	sa	sab-mobile	The application is more than excellent and is the best among banking applications in Saudi Arabia in terms of ease, confidentiality, and security.	ar	application excellent best among bank applications saudi arabia term ease confidentiality security	Positive	App Store	0	0	0
App Store	b03cde70-5a46-4365-ac22-3fef592f7a6d	F9saud	3/15/23 1:49	منتاز وسهل				en	sa	sab-mobile	Oh, how beautiful you are!	ar	oh beautiful	Positive	App Store	0	0	0
App Store	5d10a836-7124-4706-b7c4-92d60b11ff58	Mousa Qaissum	3/18/23 16:56	يحتاج لزيادة التحديث وايضا السرعه				en	sa	sab-mobile	And also the option of entering with a passcode instead of a password for faster access.	ar	also option enter passcode instead password fast access	Neutral	App Store	0	1	0
App Store	829c5d58-70d4-4004-bd01-1d4ff217f664	azzzzzzoz	3/7/23 6:43	سعيدة به				en	sa	sab-mobile	The application is very convenient, easy to use, and clear.	ar	application convenient easy use clear	Positive	App Store	0	0	0
App Store	006e7dd9-ad97-4ebc-a9a3-751df8fac390	مهدي الحمود بوجابر	3/6/23 7:31	أفضل تطبيق بنكي				en	sa	sab-mobile	All your banking needs in one amazing and user-friendly application, deserving 10 stars and more.	ar	bank need one amaze userfriendly application deserve star	Positive	App Store	1	0	0
App Store	7979c059-32c6-4ad7-9bbc-ba89b373aaaa	S3ody	3/5/23 12:44	ممتاز				en	sa	sab-mobile	Easy and fun.	ar	easy fun	Positive	App Store	0	0	0
App Store	d931b3c5-69ff-4e8d-98a2-95abb792f350	shoogsh12	3/5/23 11:09	Great				en	sa	sab-mobile	Very easy	ar	easy	Positive	App Store	0	0	0
App Store	a5519548-8bdb-49e2-9abc-31b3541a6330	Ghadaht1	3/4/23 18:22	Sabb mobile				en	sa	sab-mobile	Amazing ! All in one	en	amaze one	Positive	App Store	0	0	0
App Store	affd7a60-2be4-450e-9022-d9bb643411dc	nakotaibi	3/3/23 8:19	ممتاز				en	sa	sab-mobile	Continuous development exists.	ar	continuous development exist	Neutral	App Store	1	0	0
App Store	e328b3d0-fbf2-4b1d-b714-ef73ad2c4005	واحد متحمس خخ	3/2/23 15:57	جميل				en	sa	sab-mobile	"Beautiful and its banking services are excellent."	ar	beautiful bank service excellent	Positive	App Store	0	0	0
App Store	6eebf0a5-2017-4387-b4f2-cddbf0d71e55	جواد سلمان	3/2/23 7:39	الأحساء المنيزلة قرب مطعم ابي طالب المنيزلة				en	sa	sab-mobile	SABB Al Hufr Branch	ar	sabb al hufr branch	Neutral	App Store	0	0	0
App Store	f2b0d33e-c1c2-46f1-8749-a228bcaffd21	Salma Al-Yami	2/28/23 10:41	من افضل البنوك الي تتطور رقميا				en	sa	sab-mobile	One of the best banks that are digitally advancing.	ar	one best bank digitally advance	Positive	App Store	0	0	0
App Store	bf56934a-adad-40ea-93a7-81b72b31ad40	gino galope	2/28/23 10:17	excellent job.				en	sa	sab-mobile	convenient and secure.	en	convenient secure	Positive	App Store	0	0	0
App Store	0ff73912-343f-455e-b777-aea4f5dcf3e1	خالد خياط	2/27/23 17:56	جدة				en	sa	sab-mobile	Your service is exceptional just as we knew you, SAB. We wish you further progress and perseverance.	ar	service exceptional know sab wish progress perseverance	Positive	App Store	1	0	0
App Store	7b1ebc81-f661-44f6-b243-137668f424ac	Mohnad -	2/28/23 6:57	تعليق				en	sa	sab-mobile	Sometimes it hangs and kicks me out of the application.	ar	sometimes hang kick application	Negative	App Store	1	0	1
App Store	4983b74b-187f-4076-b828-1f9c83354617	muteb2100	2/27/23 19:08	جودة الخدمة				en	sa	sab-mobile	Unfortunately, the quality of service has deteriorated compared to before. Sometimes, my Mada card does not work without any reason. When I contact customer service, it becomes clear that there is a system malfunction, and the customer is the one affected.	ar	unfortunately quality service deteriorate compare sometimes mada card work without reason contact customer service become clear system malfunction customer one affect	Negative	App Store	1	1	0
App Store	efb8e41e-a0df-4b29-8f75-141a4bf46060	Ammmyo	2/27/23 5:42	ممتاز				en	sa	sab-mobile	"Better than before, navigating between options has become easier and more comprehensive ðð»"	ar	good navigate options become easy comprehensive	Positive	App Store	0	0	0
App Store	24085f95-151d-4281-896c-5b8bd9e9e6c4	Abrar2022	2/27/23 2:45	Abrar				en	sa	sab-mobile	Abrar	gd	abrar	Neutral	App Store	0	0	0
App Store	5f3c0c6d-44d2-47d3-bcef-179e9309db96	Fahad Alfahad_	2/26/23 17:17	Fahad				en	sa	sab-mobile	I suggest adding the "Earn+" rewards program in the application without the need to switch to the browser.	ar	suggest add earn reward program application without need switch browser	Neutral	App Store	0	0	0
App Store	fdc540b4-417e-4753-9d07-7246e491a5fe	HaniJad	2/23/23 6:38	بنك متنقل				en	sa	sab-mobile	All banking services are available in it, Mashallah. It is truly excellent. The only thing left is to withdraw cash.	ar	bank service available mashallah truly excellent thing leave withdraw cash	Positive	App Store	1	1	0
App Store	8f5ff307-be60-448c-940f-911c632bc985	Yousef Lebdan	2/21/23 13:32	ساب				en	sa	sab-mobile	Excellent, easy and fast.	ar	excellent easy fast	Positive	App Store	0	0	0
App Store	a977ada5-565a-4f1e-8658-983bf5e41ec6	Alfllatah	2/21/23 10:14	ملاحظه				en	sa	sab-mobile	Thank you with love.	ar	thank love	Positive	App Store	0	0	0
App Store	9f500035-e857-41e6-b77f-6df30ac4347f	1.13e+27	2/16/23 14:01	ج				en	sa	sab-mobile	Beautiful	ar	beautiful	Positive	App Store	0	0	0
App Store	2ecc3b3c-85d2-4103-b095-1e71d1f43355	منوعات الرحماني	2/19/23 18:57	تشغيل الموقع كل مره لفتح التطبيق				en	sa	sab-mobile	I have to activate the website every time I open the application. I hope you can cancel this website feature.	ar	activate website every time open application hope cancel website feature	Negative	App Store	0	1	0
App Store	b5bb0da7-b2fc-41e4-98e7-e5553f362573	Kareemgh	2/14/23 19:11	Professional				en	sa	sab-mobile	Professional app	en	professional app	Neutral	App Store	1	0	0
App Store	3b27aad5-71a7-4c3e-81c1-7fed232e5c7e	ALSUBAEI	2/14/23 4:53	ممتاز				en	sa	sab-mobile	Excellent and distinguished.	ar	excellent distinguish	Positive	App Store	0	0	0
App Store	c3b2c236-5f49-40c6-ab8d-d128f1fde05f	AbuYahya93	2/9/23 23:56	جيد بس لازم يتطور				en	sa	sab-mobile	The application is good and you can do all your services from it. The arrangement and ease of access to them is excellent in most of the services. It needs a slight adjustment in the ease of some services and their distribution on more pages (combining your loans and accounts in one page is a mistake). The second problem is the interfaces, they need to be rebuilt from scratch.	ar	application good service arrangement ease access excellent service need slight adjustment ease service distribution page combine loan account one page mistake second problem interfaces need rebuild scratch	Positive	App Store	1	0	0
App Store	08dfce46-aa12-481d-8ab1-14e86163b697	alioopl	2/12/23 23:46	سيء				en	sa	sab-mobile	Very bad services, and they are unable to transfer to anyone, and they always get stuck.	ar	bad service unable transfer anyone always get stick	Negative	App Store	1	1	1
App Store	969a9114-2041-4536-8b8d-c7ac1223acf1	adelkhaldi	2/5/23 13:20	شكرًا جزيلا دائما فى تالئق وتميز				en	sa	sab-mobile	Thank you very much always in brilliance, distinction, and renewal.	ar	thank much always brilliance distinction renewal	Positive	App Store	0	0	0
App Store	29686210-f7b8-41c8-acc8-32695c6eb440	محمد البكر أبوفهد	1/29/23 13:18	شكرًا لكم على تعاونكم وتميزكم				en	sa	sab-mobile	Thank you for your cooperation and excellence.	ar	thank cooperation excellence	Positive	App Store	0	0	0
App Store	d2de40e9-d2fd-4848-bf4f-4097260b8035	etchyuc	1/30/23 19:34	سرعة سداد البطاقة الئتمانيةا				en	sa	sab-mobile	Credit card repayment speed	ar	credit card repayment speed	Neutral	App Store	0	1	0
App Store	50476b8b-439d-41e1-ba88-516adf7fd52f	Mujeeb Rahman nmr	1/18/23 21:10	Mr Mujeeb Rahman				en	sa	sab-mobile	Excellent banking ever delivered	en	excellent bank ever deliver	Positive	App Store	0	0	0
App Store	fbdb3d1f-26c5-4263-8992-d16848039ea0	نواف4	1/17/23 4:01	مميز				en	sa	sab-mobile	One of the best banking applications.	ar	one best bank applications	Positive	App Store	0	0	0
App Store	178f2f63-572e-409e-9c20-766c9454e990	malshenaiber	1/16/23 2:35	ابداع	{'id': 34419538, 'body': 'عزيزي العميل, بإمكانك الإطلاع على تفاصيل النقاط من التطبيق من القائمة ومن ثم اختيار اكسب+/برامج الولاء. وأيضا بإمكانك طلب البطاقات الإئتمانية من خلال التطبيق من القائمة - منتجات ساب - طلب بطاقة ائتمانية جديدة. ', 'modified': '2023-01-22T13:02:46Z'}			en	sa	sab-mobile	The application is always evolving for the better, and the overall design is professional and beautiful; congratulations on that. I only hope that you add the option of requesting credit cards and certified checks in the application. Thank you. It would also be great if I could access my earned points within the application instead of having to open a browser.	ar	application always evolve good overall design professional beautiful congratulations hope add option request credit card certify check application thank would also great could access earn point within application instead open browser	Positive	App Store	1	1	0
App Store	43da5bf8-d409-4cef-9946-28e6d3adcb01	أبو أمير ٩٩٧	1/16/23 17:29	التطبيق القديم افضل				en	sa	sab-mobile	You can extract card data from the old version and use it.	ar	extract card data old version use	Neutral	App Store	0	1	0
App Store	6563c822-4e41-4d43-905e-57a639628ce7	البرنامج تنقصه حاجات كثيرة	1/14/23 18:13	الاحساء				en	sa	sab-mobile	Very excellent service.	ar	excellent service	Positive	App Store	0	0	0
App Store	dfd21c07-d038-4c19-9b6b-b09565e492d2	WN3	1/12/23 16:30	ممتار بالحوالات				en	sa	sab-mobile	Excellent with transfers	ar	excellent transfer	Positive	App Store	0	0	0
App Store	37801dc4-0d59-4274-bc00-b30b6669e9a9	saqirka	1/10/23 3:05	تطبيق رائع				en	sa	sab-mobile	A great application, almost all banking services are available in it, and the best part is that it is simple to use.	ar	great application almost bank service available best part simple use	Positive	App Store	0	0	0
App Store	e8f90406-05ec-4d24-a367-b05182358c6d	HossamMonir	1/4/23 7:31	افضل تطبيق و افضل بنك				en	sa	sab-mobile	Thank you, SABB Bank, the best bank in the Kingdom.	ar	thank sabb bank best bank kingdom	Positive	App Store	0	0	0
App Store	4bfb4e13-6399-45b4-afb0-f6fe481bbeab	alkaseeer	1/7/23 16:54	SALEM	{'id': 34224026, 'body': 'عزيزي عميل ساب, شكراً لاستخدامك تطبيق ساب موبايل, بإمكانك مشاركتنا تجربتك و إرفاق صورة للمشكلة مع معلومات التواصل الخاصة بك عن طريق البريد الإلكتروني أدناه :\r\n\r\nsabbcustomercare@sabb.com\r\n\r\nمع خالص تحياتنا فريق العناية \r\nبعملاء ساب\r\n', 'modified': '2023-01-11T11:26:22Z'}			en	sa	sab-mobile	The application is very bad after the latest update. Every time I enter, it tells me there is an error, because I have repeated the password more than once, even though it is my first time entering. And every time I create a new password, when I try to enter again, it tells me there is an error due to repeating the password. There is a fault with the application.	ar	application bad late update every time enter tell error repeat password even though first time enter every time create new password try enter tell error due repeat password fault application	Negative	App Store	1	1	0
App Store	5f36905c-a2a3-4a5b-bfdd-f42fe3b1f8c4	mukbil9	1/4/23 7:17	ممتاز				en	sa	sab-mobile	Excellent and easy to use.	ar	excellent easy use	Positive	App Store	0	0	0
App Store	26a3e860-0eaa-4ffa-996f-1202cbfb1939	om Slman700	1/2/23 14:42	👍🏻✅				en	sa	sab-mobile	The application is excellent and easy to use.	ar	application excellent easy use	Positive	App Store	0	0	0
App Store	dc907c48-803c-4769-8472-0185d013527e	علي الأسمري	1/1/23 14:49	SABB Is the best				en	sa	sab-mobile	My favorite bank, SABB, is a wonderful application that offers high-quality and easy banking services. You deserve 5 stars. Thank you.	ar	favorite bank sabb wonderful application offer highquality easy bank service deserve star thank	Positive	App Store	0	0	0
App Store	99a6069e-86ec-494f-9806-1de34d7af443	ام تركي 2	1/1/23 3:47	ام تركي 2				en	sa	sab-mobile	Mother of Turki 2	ar	mother turki	Neutral	App Store	1	0	0
App Store	6aae6227-f6b9-4913-a8fb-47b158292832	basell mohamed	12/22/22 12:51	تطبيق ممتاز وسلس وسهل التعامل				en	sa	sab-mobile	Excellent experience with the SAP application.	ar	excellent experience sap application	Positive	App Store	0	0	0
App Store	59e51300-4dbb-46c6-873a-65c123e1ab2c	M.Raied	12/27/22 15:31	جيد جدا				en	sa	sab-mobile	The application is excellent, except for the fact that it sometimes freezes.	ar	application excellent except fact sometimes freeze	Positive	App Store	1	0	1
App Store	fac2c28e-3c23-4f39-8214-a8700820adf2	أسماء \\	12/24/22 20:09	اختراق للحساب				en	sa	sab-mobile	There is someone who has hacked the account and is withdrawing from the balance and the person doesn't have the ability to stop these thefts????	ar	someone hack account withdraw balance person doesnt ability stop thefts	Negative	App Store	0	1	0
App Store	25bc92f5-4bb9-495a-8073-a3c73cbb56ca	a.kareim	12/21/22 15:11	سهل				en	sa	sab-mobile	Simple and easy to use ð	ar	simple easy use	Positive	App Store	0	0	0
App Store	da884f90-765a-4d2f-84a0-ecc5542d7ab6	Deer656	12/18/22 8:39	S				en	sa	sab-mobile	Vgggg	en	vgggg	Neutral	App Store	0	1	0
App Store	d53242f5-7595-42a0-8587-4fb8d3b53b4f	Elsady	12/21/22 9:27	تحديثات حلوه				en	sa	sab-mobile	Nice updates, but there are still things that need improvement.	ar	nice update still things need improvement	Positive	App Store	1	0	0
App Store	ef597305-77e0-41ed-86c7-ffd3c8682b59	ghyyygh	12/19/22 15:55	تفعيل الموقع				en	sa	sab-mobile	Why should I do website service? It infringes on personal privacy!! Please cancel this requirement.	ar	website service infringe personal privacy please cancel requirement	Negative	App Store	1	1	0
App Store	3cb4d7bf-cd22-484f-9702-3f310dfaaf4a	افضل سماعه بلوتوث	12/16/22 9:15	التطبيق سهل وسلس وبالنسبه لي افضل تطبيق بنكي				en	sa	sab-mobile	It abbreviates all services.	ar	abbreviate service	Negative	App Store	0	1	0
App Store	c45333d3-935a-4575-a14c-6e109763d48d	umambah🌷	12/13/22 12:44	الخدمة الالالكترونية الامصرفية				en	sa	sab-mobile	Wonderful and exceptional, thank you for it.	ar	wonderful exceptional thank	Positive	App Store	0	0	0
App Store	cf3ced15-5813-401d-a4f0-5b2739acb344	zoraxo	12/15/22 17:54	جيد ويحتاج تطوير				en	sa	sab-mobile	The application is very good, but it needs interface development and sometimes it freezes or crashes. It has made good progress, but we aspire to something better, especially since SABB is one of the oldest banks and deserves a professional application.	ar	application good need interface development sometimes freeze crash make good progress aspire something good especially since sabb one old bank deserve professional application	Positive	App Store	1	1	1
App Store	0b298661-4e39-49a4-9a9c-36b898e4723e	Gliding Falcon	12/8/22 7:29	Excellent				en	sa	sab-mobile	Excellent B	en	excellent b	Positive	App Store	0	0	0
App Store	6db55440-62cf-4c08-8b6e-f972c2c36a07	Lover_Days	12/5/22 13:18	تطوير وتحديث				en	sa	sab-mobile	It's good, but it needs some development and updates because sometimes it gets stuck.	ar	good need development update sometimes get stick	Neutral	App Store	1	0	1
App Store	2ac6746a-e056-4c02-9c22-6b38efe1c9d7	aburyan518	12/4/22 6:05	بطاقة الاسترداد النقدي				en	sa	sab-mobile	The conditions of the cash refund card are impossible, in every sense of the word.	ar	condition cash refund card impossible every sense word	Negative	App Store	0	1	0
App Store	dbb8c43a-a02d-4418-9ed6-339f5f20b860	Radhooooy	11/30/22 8:56	سهل و آمن				en	sa	sab-mobile	Excellent and one of the best banking applications.	ar	excellent one best bank applications	Positive	App Store	0	0	0
App Store	3582fa48-c1d9-4dfd-84cb-71dfb1491eb2	اععمم	11/27/22 18:59	جيد جداً				en	sa	sab-mobile	Evolved/developed/advanced	ar	evolveddevelopedadvanced	Neutral	App Store	1	0	0
App Store	f183a1f7-b586-470e-9937-9cfde43add7f	استاذة لطيفة بنت عبدالعزيز	11/29/22 8:57	الدمام حي الندى				en	sa	sab-mobile	I was unable to transfer the available amount in the wallet to the current account... Is there a way?	ar	unable transfer available amount wallet current account way	Neutral	App Store	0	1	0
App Store	c5ddacb5-9ccc-4d2c-bfaf-1541ba593624	ابوسندس ع	11/27/22 13:00	رائع				en	sa	sab-mobile	The application is amazing.	ar	application amaze	Positive	App Store	0	0	0
App Store	cb061f08-dc10-490a-b61d-bc84f525a8fb	J.Hawari	11/27/22 8:31	ممتاز التطبيق				en	sa	sab-mobile	Excellent indeed.	ar	excellent indeed	Positive	App Store	0	0	0
App Store	d875f09f-06ec-440d-a643-35f793bec2ec	abass61	11/27/22 5:40	منتاز				en	sa	sab-mobile	I liked it.	ar	like	Positive	App Store	0	0	0
App Store	a817641b-2c52-49b7-a93b-4d5aa257e9da	Ali Albiabi	11/26/22 8:34	ممتاز جدا				en	sa	sab-mobile	The program is excellent. Thank you very much.	ar	program excellent thank much	Positive	App Store	0	0	0
App Store	3972913f-4e8f-467a-9874-de4e4a56a51b	kawthar_h94	11/25/22 0:42	ببتتنترزلب				en	sa	sab-mobile	Very excellent	ar	excellent	Positive	App Store	0	0	0
App Store	3c64d68d-fa74-4bcc-9c60-257638067893	الاسعار غاليه نوعا ما	11/21/22 13:45	تطبيق جميل وسهل				en	sa	sab-mobile	More than wonderful.	ar	wonderful	Positive	App Store	0	0	0
App Store	2670aaf1-ef9f-4fb9-86f0-f26b2bb43b77	SRT0605	11/21/22 11:09	سلمان				en	sa	sab-mobile	Excellent application	ar	excellent application	Positive	App Store	0	0	0
App Store	2ca595a3-ee5c-4cc3-afe8-7a45f2b4c0df	Souad Elzaeim	11/20/22 18:19	ممتاز				en	sa	sab-mobile	Excellent in everything.	ar	excellent everything	Positive	App Store	0	0	0
App Store	f0560189-404b-425c-8444-608f609f085c	شسسسسسسساععنننالللل	11/20/22 14:58	سهل وسريع				en	sa	sab-mobile	"The best application, easy and fast, without any complications."	ar	best application easy fast without complications	Positive	App Store	0	0	0
App Store	432d0df1-d275-4910-893f-a4fa7f9c8eb8	Saudyes	11/16/22 8:11	رائع				en	sa	sab-mobile	Easy and smooth program.	ar	easy smooth program	Positive	App Store	0	0	0
App Store	97279993-bd6b-4466-a81d-ea72ef454d1c	خلف الحربي---	11/20/22 13:14	يحتاج التطبيق بعض الإضافات				en	sa	sab-mobile	Credit or debit cards have the expiration date and the card number present, but the application lacks the display of the card's CVV number. We hope it will be added in the upcoming update of the application.	ar	credit debit card expiration date card number present application lack display card cvv number hope add upcoming update application	Neutral	App Store	0	1	0
App Store	bf81ea65-51a0-4737-9160-dcad142f3904	Ramirhz	11/18/22 9:38	رائع لكن بطيء نوعا ما				en	sa	sab-mobile	All services are available in the application and it is still evolving with continuous improvement. Sometimes the response may be slow when sending orders or executing services.	ar	service available application still evolve continuous improvement sometimes response may slow send order execute service	Neutral	App Store	1	0	1
App Store	d06ed511-1885-4f73-9fca-aa7cfb416b00	رايق ومطنش	11/10/22 10:50	ممتاز				en	sa	sab-mobile	The application is very easy, but I wish I could sell the stocks I bought through the application. I have nine stocks that I want to sell, but I have to go to the branch. So, it's not worth it.	ar	application easy wish could sell stock buy application nine stock want sell go branch worth	Negative	App Store	0	0	0
App Store	d601046b-7c25-4519-8915-bfe74b1a0d2c	defender200021	11/15/22 17:34	التحديث الاخير				en	sa	sab-mobile	The latest update has problems, please fix them. The most important issues are: - It disconnects frequently during use, especially when choosing conversion options, adding beneficiaries, and making transfers. - When making a transfer to a local bank, an error occurs and then the amount is suspended and deducted later without any proof of the transfer being provided until it is completed. Please a…	ar	late update problems please fix important issue disconnect frequently use especially choose conversion options add beneficiaries make transfer make transfer local bank error occur amount suspend deduct late without proof transfer provide complete please add confirmation message transfer occur process least instead display error message	Negative	App Store	0	1	1
App Store	8fee0402-b243-421c-9f7d-291dc2d8cf0c	ayi.7	11/14/22 8:45	تجربتي مع الاول وساب				en	sa	sab-mobile	One of the worst banks I have dealt with. The service is bad, the application is complicated, and I do not recommend it at all. Those who have their salary with them and can transfer to another bank should do so. I swear the bank is very bad. They have unjustly taken nearly 150,000 riyals from me. May God take revenge on them and on the previous bank as well.	ar	one bad bank deal service bad application complicate recommend salary transfer another bank swear bank bad unjustly take nearly riyals may god take revenge previous bank well	Negative	App Store	1	0	0
App Store	f7c8fe40-de4e-4242-8716-e42381d74b56	bassamkov	11/6/22 17:31	بنك ساب				en	sa	sab-mobile	Honestly, a beautiful bank with the most wonderful services.	ar	honestly beautiful bank wonderful service	Positive	App Store	0	0	0
App Store	b7e97156-bdce-4e93-810e-dc97ac0edbf6	Zoss_93	11/8/22 11:46	لا انصح به				en	sa	sab-mobile	I do not recommend it as it is one of the most complicated banks, but God willing, it will all be resolved in less than a year and the loan will be closed, the account will be closed with them, and I will eliminate them from my life without any return.	ar	recommend one complicate bank god will resolve less year loan close account close eliminate life without return	Negative	App Store	1	0	0
App Store	9c1cdaa8-2eba-45bb-be6c-a0eb02b74702	WTR.30000	11/1/22 19:56	ممتاز				en	sa	sab-mobile	The new update is excellent and fast.	ar	new update excellent fast	Positive	App Store	0	0	0
App Store	fdcabe0c-2dab-4239-a5eb-75d7326f1b17	بندر440	10/27/22 18:13	الرياض				en	sa	sab-mobile	Cannot be updated	ar	update	Neutral	App Store	0	1	0
App Store	87b8298f-15fc-491d-b257-2a76b5f7b072	wael996	10/30/22 14:30	تطبيق سهل				en	sa	sab-mobile	But I would like to have the option of validating after entering a password with a code or a verification message if the last use of the application was verified by text messages.	ar	would like option validate enter password code verification message last use application verify text message	Neutral	App Store	0	1	0
App Store	42520fb4-7ac6-45a3-8668-97bd6cf55ea9	😎ابو يزيد😎	10/25/22 16:01	محمد رمضان				en	sa	sab-mobile	"A wonderful application that truly deserves every star."	ar	wonderful application truly deserve every star	Positive	App Store	0	0	0
App Store	7f0baf55-8798-4a97-82b6-306734c3776b	yazeed aloqaily	10/27/22 14:15	يحتاج تطوير				en	sa	sab-mobile	Not advanced/underdeveloped.	ar	advancedunderdeveloped	Neutral	App Store	1	0	0
App Store	82a1c2a0-85e9-4bc0-9286-c206993b8a1b	Djejdfosnxidjsnxkdjn	10/27/22 11:01	التطبيق يعللللق				en	sa	sab-mobile	The application has become slow and it lags. Make it like Al Rajhi Bank, their application is fast and easy.	ar	application become slow lag make like al rajhi bank application fast easy	Negative	App Store	0	0	1
App Store	674e6bd4-9734-4dbf-befd-c808195d2a59	هتااااان	10/7/22 20:37	جدة				en	sa	sab-mobile	Great, but I need something and I couldn't find it in the application. I want to pay off an amount for a personal loan, how can I do it?	ar	great need something couldnt find application want pay amount personal loan	Negative	App Store	1	1	0
App Store	a266cd85-4407-4cc3-a04f-0b2db3de2019	f.kh	10/16/22 12:44	التحديث الاخير سئ				en	sa	sab-mobile	It's not fair that every few days I have to figure out the device in order to access my account, and today since morning it's frozen and not recognizing the device, even though it's the same device I use every time.	ar	fair every days figure device order access account today since morning freeze recognize device even though device use every time	Negative	App Store	0	0	1
App Store	b1174948-32c0-42c3-8a71-3382444e08d3	Mr.Hany	10/2/22 21:48	ممتاز				en	sa	sab-mobile	Honestly, the application is easy and it has creativity.	ar	honestly application easy creativity	Positive	App Store	0	0	0
App Store	8ecefb83-ebda-4c55-b71b-50505f311cee	s.alo.s	9/27/22 21:28	تطبيق سيئ				en	sa	sab-mobile	Unfortunately, the application is annoying as it asks for an update every day. Can you please clarify why there are frequent updates?	ar	unfortunately application annoy ask update every day please clarify frequent update	Negative	App Store	1	0	0
App Store	92508b31-a61f-4762-93a1-be1f4cd94bcc	Bandar 666666	9/14/22 14:06	تقييم مانع الاسمري				en	sa	sab-mobile	Evaluation of the preventive measures	ar	evaluation preventive measure	Neutral	App Store	1	1	0
App Store	1900fc32-022a-443f-87d1-6d0f600b68d0	rg.xx	9/16/22 14:33	ياخي تطورو شوية فبرنامجك				en	sa	sab-mobile	Hey, improve your program a little.	ar	hey improve program little	Negative	App Store	1	0	0
App Store	d9880d2a-605b-4a9d-86ba-ebcb517491e9	AhmedSmoll	9/8/22 21:00	اسهل واسرع واجمل برنامج للبنوك				en	sa	sab-mobile	The easiest, fastest, and most beautiful banking application	und	easy fast beautiful bank application	Positive	App Store	0	0	0
App Store	f6c66835-f8f9-4264-bb8b-3bb7df68ba4e	تش	9/7/22 13:46	شكرا ساب				en	sa	sab-mobile	Easy and useful application, and the messaging service from the application is a very excellent service that is characterized by speed and ease. Thanks goes to sister Ghada. Thank you, SABB Bank.	ar	easy useful application message service application excellent service characterize speed ease thank go sister ghada thank sabb bank	Positive	App Store	0	0	0
App Store	b3aa38ec-a04c-49f9-a0f3-0def127839c3	said bakry	9/8/22 16:40	الطائف				en	sa	sab-mobile	Payment of fees	ar	payment fee	Neutral	App Store	0	1	0
App Store	02782c7a-441d-4273-a103-a92f9371ef33	عبدالله العناد	9/5/22 8:14	سكاكا				en	sa	sab-mobile	Abdullah Majid Al Anad	ar	abdullah majid al anad	Neutral	App Store	0	0	0
App Store	a36d204e-dd83-4050-9cc9-635ab26c0937	fsgnkic	9/3/22 17:06	Fsfsfsfsfshfdhnsff				en	sa	sab-mobile	Fsm	en	fsm	Neutral	App Store	0	0	0
App Store	196dd54c-6b6c-47bf-96e3-58cf2e9d2f68	سلطان السويهري	9/1/22 18:16	سلطان				en	sa	sab-mobile	Smooth and beautiful application	ar	smooth beautiful application	Positive	App Store	0	0	0
App Store	29499a44-a875-4879-ab51-2bf46ad5c5f8	اااااال1234	9/2/22 14:49	لابأس				en	sa	sab-mobile	No problem.	ar	problem	Neutral	App Store	0	1	0
App Store	d39205e4-4620-4578-a296-02f095f5987f	sourtraveller	8/28/22 14:31	فنان				en	sa	sab-mobile	To destroy it like that is excellent.	ar	destroy like excellent	Negative	App Store	0	0	0
App Store	0b364a2f-238e-4231-9883-636cb91d3085	Saleh 2006	8/26/22 12:39	ساب بنك رائع				en	sa	sab-mobile	Easy to use and all the information is available.	ar	easy use information available	Positive	App Store	0	0	0
App Store	ddba7f6d-c4bd-4941-8749-d8bbafdcd273	ahmad j Alsadah	8/24/22 18:18	دام عزك يا ساب				en	sa	sab-mobile	Ahmed Al-Sada	ar	ahmed alsada	Neutral	App Store	0	0	0
App Store	ab59920b-63af-489f-a060-849c5c343b07	ابو رضوي	8/24/22 5:31	محمد حافظ				en	sa	sab-mobile	Good experience	ar	good experience	Positive	App Store	0	0	0
App Store	b6d6ee17-2605-4340-b5ef-277fe1c5e397	sadeq5rt	8/22/22 14:40	اسطوره				en	sa	sab-mobile	legendary	ps	legendary	Positive	App Store	0	0	0
App Store	19785ba7-b260-4b44-916b-17cb9399d9b5	ابراهيم يوسف محمد انفيد	8/21/22 0:40	ابراهيم يوسف محمد انفيد				en	sa	sab-mobile	Ibrahim Youssef Mohammed Anfid	ar	ibrahim youssef mohammed anfid	Neutral	App Store	0	0	0
App Store	bf679f19-bf12-4dad-8830-fc1290a853db	مها 1212	8/19/22 12:40	سهل الاستخدام				en	sa	sab-mobile	Easy to use	ar	easy use	Positive	App Store	0	0	0
App Store	51ac6c09-32c0-4d61-a98b-dbb03dad5a52	مفيد جداً ومختصر للوقت الزمني	8/17/22 0:42	الخدمات الالكترونية متوفره على تطبيق ساب				en	sa	sab-mobile	We thank you for the best available features among banks in development and achievement.	ar	thank best available feature among bank development achievement	Positive	App Store	0	0	0
App Store	9852c705-84d6-4d21-a249-bad42b9ed89e	متفائل الشرقية	8/14/22 18:13	سيهات				en	sa	sab-mobile	There is noticeable improvement. Good job!	ar	noticeable improvement good job	Positive	App Store	1	0	0
App Store	f3aae023-35df-46f7-b308-064ffec6772c	Adel79aa.	8/16/22 13:57	تجربتي مع البنك سيئة جدا				en	sa	sab-mobile	The bank's customer services are ineffective, even if you file a complaint.	ar	bank customer service ineffective even file complaint	Negative	App Store	1	0	0
App Store	4c328b80-e890-44e8-b806-cb4e430d1fd6	احمد آل سعد	8/15/22 21:06	تعليق				en	sa	sab-mobile	No comment.	ar	comment	Neutral	App Store	0	1	0
App Store	76f78a68-7d77-47f6-ac8d-94662767f482	bisharah22	8/12/22 19:30	مكه المكرمه / النزهه				en	sa	sab-mobile	May Allah protect and bless you.	ar	may allah protect bless	Positive	App Store	1	0	0
App Store	25473d76-b71b-4e1d-b1be-075999be5b3d	ahmedttttttt	8/10/22 17:22	Thanks				en	sa	sab-mobile	Done	en	do	Positive	App Store	0	1	0
App Store	8348e04d-4aeb-41e2-8e01-6b1dcec6a447	RS🦄	8/12/22 9:23	Baad				en	sa	sab-mobile	The worst application ðð»	ar	bad application	Negative	App Store	1	0	0
App Store	831326b6-6b0a-4990-b7bd-2f5355aaa261	El_rd1	8/11/22 7:35	ً				en	sa	sab-mobile	Honestly, the application is nice, but it's difficult to access and there is no facilitation, like a short login code of five digits or using Facebook ID.	ar	honestly application nice difficult access facilitation like short login code five digits use facebook id	Negative	App Store	1	1	0
App Store	40ec131a-47cd-45c9-a92c-186916eafd8f	Ehab Elsawy	8/10/22 7:55	تطبيق ممناز				en	sa	sab-mobile	This application has saved us a lot of time in accessing accounts, making transfers, and conducting all transactions instead of opening the computer and entering passwords, and so on.	ar	application save us lot time access account make transfer conduct transactions instead open computer enter passwords	Positive	App Store	0	1	0
App Store	19e04015-9cb5-480a-8cc9-0b5a5013f204	shhadat mohhamad	8/8/22 18:27	Great				en	sa	sab-mobile	Best bank at Saudi Arabia	en	best bank saudi arabia	Positive	App Store	0	0	0
App Store	6b1bd476-d0f8-4bf0-b7e2-7377616bc050	Abo-Faras	8/6/22 12:08	بنك رائع مواكب التطور 👌				en	sa	sab-mobile	A beautiful experience with an advanced bank that has all the unique features.	ar	beautiful experience advance bank unique feature	Positive	App Store	0	0	0
App Store	a96a5a79-ea4b-4d13-a0e8-06e341dd6507	az.2005	8/4/22 8:32	التطبيق في تطور مستمر				en	sa	sab-mobile	The application keeps evolving and becomes better over time.	ar	application keep evolve become good time	Positive	App Store	1	0	0
App Store	ce672c45-2b02-4561-94ab-1967566adbea	majid_1438	7/29/22 14:18	نعم				en	sa	sab-mobile	"Indeed, Allah and His angels bless the Prophet. O you who have believed, bless him and salute him with a worthy salutation." (Peace be upon him)	ar	indeed allah angels bless prophet believe bless salute worthy salutation peace upon	Positive	App Store	1	0	0
App Store	74469be2-4be7-40e9-8744-fdabfdefe604	bu hattan	8/1/22 19:06	اتمنى اضافة الدخول بواسطة Face ID				en	sa	sab-mobile	The application is beautiful and easy to use, but one of its main drawbacks is that it does not have Face ID login! We understand the bank's focus on security efficiency, as most banks have this service except for this bank. Note: The star is for certain services.	ar	application beautiful easy use one main drawbacks face id login understand bank focus security efficiency bank service except bank note star certain service	Negative	App Store	1	1	0
App Store	6568c5c6-fa0f-4ae0-a9cd-93ab45a42483	aleid2010	7/29/22 8:19	Excellent				en	sa	sab-mobile	Very excellent and easy to deal with.	ar	excellent easy deal	Positive	App Store	0	0	0
App Store	12d71897-24c2-4aa6-b2c3-0ee395a735bd	Ranosh87	7/28/22 10:10	جميل جدا وسهل				en	sa	sab-mobile	The application is unique and easy to use.	ar	application unique easy use	Positive	App Store	0	0	0
App Store	45bb6eae-1093-4019-b8be-4e7325641c0f	Khaledhoom	7/27/22 12:30	نحو القمة				en	sa	sab-mobile	Keep up the good work, dear banker.	ar	keep good work dear banker	Positive	App Store	0	0	0
App Store	f6b6a0ba-b0e8-4fbb-8407-893b3cd554e3	moh997	7/27/22 12:23	شكرا ساب				en	sa	sab-mobile	Thank you, SAP.	ar	thank sap	Positive	App Store	0	0	0
App Store	df09b19e-4866-4e17-9aa3-f5f1525d6d53	jikofawzy	7/23/22 18:06	جميل جدا				en	sa	sab-mobile	Very beautiful.	ar	beautiful	Positive	App Store	0	0	0
App Store	d1d9457b-5c8f-4359-b9fb-5e23b7cb0cce	محمد نباط	7/25/22 5:41	مايشتغل				en	sa	sab-mobile	I have the SAP application, but it doesn't work. I have tried several times, but it keeps showing me a "blocked" message. Please try again later.	ar	sap application doesnt work try several time keep show block message please try late	Negative	App Store	0	1	0
App Store	2e7e3969-d143-4ea6-9aba-f8a28ca9ba63	maryem al nashwan	7/20/22 17:46	شكرا لكم				en	sa	sab-mobile	Very beautiful and practical, thank you for this application. I ask Allah for abundant, blessed and good provision for us and for you.	ar	beautiful practical thank application ask allah abundant bless good provision us	Positive	App Store	1	0	0
App Store	029b3893-eb79-49b9-bbc9-1272fc030a44	omb1965	7/20/22 12:44	تقييم				en	sa	sab-mobile	The process is fast and easy, but the abundance of beneficiary information.	ar	process fast easy abundance beneficiary information	Positive	App Store	0	0	0
App Store	8391509c-a255-43fb-9002-27ea2899d80d	Mohdawwad	7/19/22 10:08	تطبيق جيد				en	sa	sab-mobile	Good application	ar	good application	Positive	App Store	0	0	0
App Store	50067e80-4f33-4cc4-9aa9-150b9a764693	Aser akbar	7/11/22 8:53	Nice				en	sa	sab-mobile	Overall nice app	en	overall nice app	Positive	App Store	0	0	0
App Store	e28905b8-dc34-494c-a9c6-dfeb23a54d3d	ابو حبال	7/8/22 15:01	الدمام				en	sa	sab-mobile	Excellent once.	ar	excellent	Positive	App Store	0	0	0
App Store	2b3a5033-98fc-4eee-83ca-9d25b5027d16	Mr.Abo Yazn	7/6/22 13:28	افضل تطبيق				en	sa	sab-mobile	I have tried all the applications in all banks. The best application is easy to use and secure.	ar	try applications bank best application easy use secure	Positive	App Store	0	0	0
App Store	cd8f6827-ebc7-49ef-8883-4d5a9d729c21	Ahmed7576	7/5/22 10:35	Nice				en	sa	sab-mobile	I appreciated	en	appreciate	Positive	App Store	0	0	0
App Store	55784f32-8e74-48f6-b932-9fd9e1dca5f8	moh2336	7/5/22 13:28	التطبيق				en	sa	sab-mobile	A failed and very difficult to use application, even the mobile banking is more difficult than it. I wish I hadn't opened an account with them. ððð	ar	fail difficult use application even mobile bank difficult wish hadnt open account	Negative	App Store	1	0	0
App Store	170ce706-7f22-4759-9268-e464fdf2ff56	Ahmed Al Dofian	7/4/22 20:27	تطوير رائع				en	sa	sab-mobile	Thank you for developing the application that we have been waiting for a long time. It is very beautiful.	ar	thank develop application wait long time beautiful	Positive	App Store	1	0	0
App Store	4dae6e22-7878-405c-a90f-85c9f6546513	ممتاز ويستحق النجوميه	7/3/22 20:34	ممتاز				en	sa	sab-mobile	Beautiful application and deserves 5 stars.	ar	beautiful application deserve star	Positive	App Store	1	0	0
App Store	8f1eaff1-efd5-48d9-ac16-be9de4600e39	شمس ١	7/2/22 22:06	ش م س				en	sa	sab-mobile	I greatly enjoy using the SAP application.	ar	greatly enjoy use sap application	Positive	App Store	0	0	0
App Store	861386b8-1ee7-4a55-90a0-38ec1e3af9ab	Khalid shaheen	6/28/22 21:09	ممتاز				en	sa	sab-mobile	The design is simple but smooth in use.	ar	design simple smooth use	Positive	App Store	0	0	0
App Store	e58acac4-3e18-4622-8561-f13b67f5ba83	qaws1357	6/27/22 10:07	الملاحظات على تطبيق ساب				en	sa	sab-mobile	Notes on SAP application: 1- The letters are too small to be seen with the naked eye compared to Al Rajhi Bank. 2- Communicating with the employees is also difficult. 3- Adding a monthly deduction is difficult and not understood.	ar	note sap application letter small see naked eye compare al rajhi bank communicate employees also difficult add monthly deduction difficult understand	Negative	App Store	1	0	0
App Store	364157e9-4b5b-4ffd-abc8-a1cc3267dbfd	buihyui	6/27/22 5:46	مرضي				en	sa	sab-mobile	Better than other bank accounts, but the application is considered somewhat slow.	ar	good bank account application consider somewhat slow	Negative	App Store	1	0	1
App Store	10b24b37-123b-4cc7-8f20-1a4fda8f3cc9	A.M.A.Q.60	6/20/22 9:06	رائع				en	sa	sab-mobile	One of the best applications.	ar	one best applications	Positive	App Store	0	0	0
App Store	f8ac97af-574d-4629-8b96-45641a10e3e6	nsaeer	6/15/22 7:59	الرياض				en	sa	sab-mobile	The service is exceptional.	ar	service exceptional	Positive	App Store	0	0	0
App Store	baf966c3-684b-4928-aafb-9a1e225167b6	Hussainkojon	6/16/22 17:39	كل يوم تحديث !!				en	sa	sab-mobile	What is this bank that updates every day? Seriously, find a solution for yourselves. I have to log in and update every day!	ar	bank update every day seriously find solution log update every day	Negative	App Store	1	0	0
App Store	72acc948-bd2d-405c-9cfb-9418756167fa	عزوز الغزواني	6/14/22 16:06	خايس				en	sa	sab-mobile	Honestly, the worst program is from the banks. If you enter the wrong password twice or three times, they will block the account and you have to go to Google to fix it from there. It's a hassle and wastes time and money.	ar	honestly bad program bank enter wrong password twice three time block account go google fix hassle waste time money	Negative	App Store	1	1	1
App Store	c010f596-a7e4-4e10-b471-e20deb087254	عبدالمجيد الكويكبي	6/12/22 10:35	سكاكا				en	sa	sab-mobile	The Jawf region	ar	jawf region	Neutral	App Store	1	0	0
App Store	9f62f134-af9f-465a-86a0-9af71b5dcd0b	التحسينات جدا ممتازة	6/10/22 10:15	التطبيق				en	sa	sab-mobile	The improvements are very excellent.	ar	improvements excellent	Positive	App Store	0	0	0
App Store	ba62655b-998c-426e-a8a1-9637a4addb5f	B'coocker	6/9/22 6:33	بنك ساب				en	sa	sab-mobile	One of the best banking applications I have tried.	ar	one best bank applications try	Positive	App Store	0	0	0
App Store	f92d35bc-a681-4c1d-b9f8-f1ca70e9a829	اياد٤٧	6/9/22 16:40	مشاكل التطبيق				en	sa	sab-mobile	Ever since the new version of the application was released, we have been plagued with updates and problems, including: 1- One-time verification code: When you receive it, you must enter it in reverse order. Automatically, it should be entered as soon as the message is received. 2- There is a problem with paying bills. The update has a glitch in the partial payment feature. When you enter the part…	ar	ever since new version application release plague update problems include onetime verification code receive must enter reverse order automatically enter soon message receive problem pay bill update glitch partial payment feature enter partial amount select move payment transfer page say error occur thank	Negative	App Store	0	1	0
App Store	d224db23-f76c-4e57-81b4-2d850c304339	abdualrahman h h	6/8/22 6:54	افضل تطبيق بنكي بالمملكه ❤️🙏👍👍👍				en	sa	sab-mobile	The best banking application in the kingdom â¤ï¸ðððð And the best bank.	ar	best bank application kingdom best bank	Positive	App Store	0	0	0
App Store	c71cdb32-f28b-4fba-ab21-5f0e8f320942	التائبه لربها	6/6/22 6:10	سرعه انجاز المهام عبر التطبيق				en	sa	sab-mobile	The application is fast.	ar	application fast	Positive	App Store	0	0	0
App Store	6803e45c-5665-4966-8d64-9acfcc13e226	Naseem_Zaki	5/31/22 8:28	سهل				en	sa	sab-mobile	The application is easy to use.	ar	application easy use	Positive	App Store	0	0	0
App Store	6a857bf5-6c86-4414-9b60-cce355b85aa4	Rabea saati	5/28/22 10:00	يعطيكم العافية اختصرتو علينا اشياء كثير				en	sa	sab-mobile	Thank you, you've simplified many things for us	und	thank youve simplify many things us	Positive	App Store	0	0	0
App Store	319df85e-b334-4fd1-910e-041f38cde1c9	Almarri JR	5/29/22 17:15	مشكلة في تسجيل الدخول				en	sa	sab-mobile	When logging in, a page appears indicating "Your session has expired. Please log in again."	ar	log page appear indicate session expire please log	Neutral	App Store	0	1	0
App Store	f99d46d5-2982-43c3-8356-6efbf92543bd	majed_24_24	5/27/22 14:27	شكرا بنك ساب				en	sa	sab-mobile	A wonderful application and fast service.	ar	wonderful application fast service	Positive	App Store	0	0	0
App Store	5caab3d0-f5f5-4bfc-aab2-6131ccfe261d	zezo11111111111	5/26/22 15:58	Saab net				en	sa	sab-mobile	The application has become much easier than before and everything is organized. Thank you for the beautiful update.	ar	application become much easy everything organize thank beautiful update	Positive	App Store	1	0	0
App Store	15aa6e22-dfe9-48ce-88be-ed99bebd4bd0	hind otbi	5/27/22 5:22	قروشونا بتحديثاتكم				en	sa	sab-mobile	Please update us with your updates.	ar	please update us update	Neutral	App Store	0	1	0
App Store	cee602c5-dee9-4c5d-a848-563862eaebdf	Mismail88	5/26/22 9:56	ممتاز				en	sa	sab-mobile	Easy and beautiful application	ar	easy beautiful application	Positive	App Store	0	0	0
App Store	bf9e4072-4e74-4c66-8b63-523388e6b52a	AliYousefS	5/26/22 7:47	تطور كبير وملحوظ				en	sa	sab-mobile	The development in the application, its interface, and its ease of use are very significant compared to previous versions. It is one of the best banking applications available in the kingdom.	ar	development application interface ease use significant compare previous versions one best bank applications available kingdom	Positive	App Store	0	0	0
App Store	a56ff14b-d1c0-4f84-96bc-4312403278b6	Fassuly	5/26/22 7:50	يحتاج سرعة في الاداء				en	sa	sab-mobile	Generally excellent and safe, but it should compete with companies like STC in facilitating payments and domestic and international transfers.	ar	generally excellent safe compete company like stc facilitate payments domestic international transfer	Positive	App Store	0	0	0
App Store	31157191-d91e-4d8d-ac54-84e252f3b8b8	ibrahim alabdulmuhsin	5/25/22 4:14	مميز				en	sa	sab-mobile	Distinct or unique	ar	distinct unique	Neutral	App Store	1	0	0
App Store	bb4a5854-7769-443f-91b7-bf628eb28d4a	WAlaboud	5/24/22 2:54	ممتاز				en	sa	sab-mobile	The application is practical to use.	ar	application practical use	Positive	App Store	0	0	0
App Store	635a18b2-94ad-4642-8237-9e552cac58c8	gjeung	5/23/22 8:29	جده				en	sa	sab-mobile	Jeddah	ar	jeddah	Neutral	App Store	0	1	0
App Store	925c1f25-16c9-4612-aaac-95e0ed5dd153	Maj0051351	5/23/22 16:51	لا باس				en	sa	sab-mobile	Check out Al Rajhi Bank's application, it's easy and simple.	ar	check al rajhi bank application easy simple	Positive	App Store	0	0	0
App Store	9c04c3f2-0d89-4f86-b575-09f6d2964097	Salman69	5/23/22 6:53	بنكي المفضل من ثلاثين سنة 👍🏼				en	sa	sab-mobile	The development happening is unbelievable. The best application interface for banks.	ar	development happen unbelievable best application interface bank	Positive	App Store	0	0	0
App Store	fabf1817-4e2f-41ff-9759-dae3a440deba	adam010203	5/21/22 6:32	User				en	sa	sab-mobile	Excellent job	en	excellent job	Positive	App Store	0	0	0
App Store	bac84d9d-cd02-41f7-b5f4-93434a3eff51	aboabd85	5/21/22 14:35	جيدة				en	sa	sab-mobile	Paying government services is easy.	ar	pay government service easy	Neutral	App Store	0	0	0
App Store	497bf55a-73b8-4437-a009-518e3fadab00	Hussainaj	5/19/22 4:43	سلس و سريع				en	sa	sab-mobile	Smooth, fast, and contains all services in an organized manner.	ar	smooth fast contain service organize manner	Positive	App Store	0	0	0
App Store	2cfd27ac-fa4a-4e8f-94a9-ec6693cbe45b	Albandari Ali	5/15/22 19:16	بنك رائع				en	sa	sab-mobile	The application is great, like a bank. Seriously, one of the best banks in terms of services, convenience, and sweet employees.	ar	application great like bank seriously one best bank term service convenience sweet employees	Positive	App Store	0	0	0
App Store	83d018f6-e10b-47e9-8500-7c0d334f23f1	نايف السـالم	5/9/22 2:46	كان من أول				en	sa	sab-mobile	An excellent program with noticeable development, and they thank those in charge of it.	ar	excellent program noticeable development thank charge	Positive	App Store	0	0	0
App Store	2996f14f-0de7-4048-a70c-2b72ab495037	Ferid a.	5/9/22 9:16	Mr				en	sa	sab-mobile	More handy	en	handy	Positive	App Store	0	0	0
App Store	7cfad7f1-5fca-4968-8423-7ad913588f85	ممتاز لحد ما	5/8/22 19:04	منتاز				en	sa	sab-mobile	Five stars.	ar	five star	Neutral	App Store	1	0	0
App Store	813584c5-41ec-475c-b978-2c219ff3ac36	Mr. Zebermaoy	5/8/22 8:57	ممتاز				en	sa	sab-mobile	It works excellently.	ar	work excellently	Positive	App Store	0	0	0
App Store	67856848-a765-4ce4-a999-10ea635bab05	مناير ١	4/29/22 13:38	ارجوا خل مشكلتي				en	sa	sab-mobile	I have been seeing the message "User name is banned" for four days when trying to log in to SAP mobile. I can't access it. What could be the reason?	ar	see message user name ban four days try log sap mobile cant access could reason	Negative	App Store	0	1	0
App Store	e492d83e-cbf3-402c-ba03-f42ca63b0f90	Ahmed 001415	4/28/22 3:31	التحديثات كثيييره				en	sa	sab-mobile	Lately, there have been many updates from you.	ar	lately many update	Neutral	App Store	0	0	0
App Store	949b0396-4996-4cb2-927e-dad0ae775802	ميدو ٩٩	4/24/22 16:43	التطبيق جيد				en	sa	sab-mobile	"My condition is suitable for all services."	ar	condition suitable service	Neutral	App Store	1	0	0
App Store	e3a36cbc-f10e-4f4a-b905-b7f327241dc5	drooob.1	4/22/22 7:19	تطبيق ساب				en	sa	sab-mobile	I am very disappointed with your bank and forced to deal with you because you merged with the first bank. Your application is a failure and does not accept transfers or payments except with difficulty. I regret giving you even one star.	ar	disappoint bank force deal merge first bank application failure accept transfer payments except difficulty regret give even one star	Negative	App Store	1	1	0
App Store	18d94a8c-04a8-49e1-98ee-e8898af4ae05	مواااادع	4/12/22 16:40	تحسن عن اول				en	sa	sab-mobile	Improved from before.	ar	improve	Positive	App Store	0	0	0
App Store	70371a9c-b377-4c22-8ddf-832dc444656a	gh22222161618181	4/9/22 23:11	👎🏻👎🏻👎🏻😡				en	sa	sab-mobile	Too many updates ðð»	ar	many update	Neutral	App Store	1	0	0
App Store	2df00ab3-ccb7-4fdc-b006-55314c38f0d2	sahar502	4/2/22 8:26	استخدام التطبيق				en	sa	sab-mobile	A wonderful experience, a time and effort saver.	ar	wonderful experience time effort saver	Positive	App Store	0	0	0
App Store	4204c748-2ad1-4b4c-871c-36fdc99c8376	mesh joj totah	3/29/22 13:11	Mashael				en	sa	sab-mobile	Almazyad	ru	almazyad	Neutral	App Store	0	0	0
App Store	f9f5e82e-baaf-49ba-8bc7-ec42f2c97160	المستكن الهادي	3/30/22 6:27	وائل				en	sa	sab-mobile	The quiet dwelling	ar	quiet dwell	Neutral	App Store	1	0	0
App Store	e65ee7d6-e8e2-4fab-b916-a1fd0c50e62c	محمد علي غروي	3/27/22 17:20	بنك مميز				en	sa	sab-mobile	Distinguished bank	ar	distinguish bank	Neutral	App Store	1	0	0
App Store	69499391-5fb4-47dd-80fd-da46f55409d6	marwan yafouz	3/26/22 13:59	التطوير ممتاز				en	sa	sab-mobile	But the customer service is very bad and they lack manners in dealing with people.	ar	customer service bad lack manners deal people	Negative	App Store	1	0	0
App Store	58d9ee70-d11c-4e80-925d-cd60e2f6fd19	AbuMohammad AbuSadiq	3/21/22 18:49	Nice				en	sa	sab-mobile	Fantastic app	en	fantastic app	Positive	App Store	0	0	0
App Store	5c88a2fa-697e-4a78-beae-6427f7999ffb	سعد_الرياض	3/7/22 13:31	سرعة في الانجاز				en	sa	sab-mobile	fast and distinguished	sd	fast distinguish	Positive	App Store	0	0	0
App Store	8df9bd7f-589f-499b-a86a-2503f1b7e707	la men ho	3/12/22 10:55	Last update				en	sa	sab-mobile	The latest update is very bad and the app is difficult to use. I prefer using an app from 2013 with its design and how it doesn't freeze all the time. The initial design was better, clearer, and easier to use. I don't know why you went back on yourselves.	ar	late update bad app difficult use prefer use app design doesnt freeze time initial design good clear easy use dont know go back	Negative	App Store	1	0	1
App Store	e20ed42a-1faf-466e-b290-a91f8d4eceae	fawaz1978	3/6/22 10:12	خطأ تقني				en	sa	sab-mobile	Please adjust the daily limit for transferring funds between customers' accounts at SABB Bank. There is a discrepancy between the application and the online platform.	ar	please adjust daily limit transfer fund customers account sabb bank discrepancy application online platform	Neutral	App Store	1	1	0
App Store	c3d9b2f0-6305-464c-89b9-e62e97f2888e	Mohammed Al Brahim	3/6/22 15:40	التحديث الجديد سيء				en	sa	sab-mobile	The old update was much better and its usage was comfortable for the eyes. Everything was organized with some problems that I expected could be fixed, making it the best banking application ever. But I don't know who wanted to innovate and ruined it. May God guide them! ð¥²	ar	old update much good usage comfortable eye everything organize problems expect could fix make best bank application ever dont know want innovate ruin may god guide	Positive	App Store	1	0	0
App Store	5f7e2e3b-d181-4639-a373-87399445848d	مستخدم😴	3/2/22 20:14	ممتاز				en	sa	sab-mobile	The new update fixed most of the technical errors and its appearance has become more advanced than before. Thank you, SAP.	ar	new update fix technical errors appearance become advance thank sap	Positive	App Store	0	1	0
App Store	503a1c99-189b-4547-9bd7-4367440179d3	صدى الآهات	2/23/22 23:18	شكراً لكم				en	sa	sab-mobile	A very beautiful application.	ar	beautiful application	Positive	App Store	0	0	0
App Store	c0b60fa6-854d-41d9-a9f1-3199852d64b3	7MAAS	2/27/22 21:45	مشكلة				en	sa	sab-mobile	The latest update has many problems. You can't transfer or pay bills.	ar	late update many problems cant transfer pay bill	Negative	App Store	0	1	0
App Store	f2bb89a2-58e8-4231-a91d-bc584cb4261f	YAHIA MADKHALY	2/23/22 9:32	بنك ساب				en	sa	sab-mobile	Very good	ar	good	Positive	App Store	0	0	0
App Store	b16040f1-1f9e-40ea-a449-1c077b9f468e	Alimas333	2/20/22 14:49	التحديث الاخير لا يعمل نهائيًا ويظهر لي Technical Error				en	sa	sab-mobile	The latest update is not working at all and shows me a Technical Error	ar	late update work show technical error	Negative	App Store	0	1	0
App Store	1d8460f2-3e83-4d6d-a7de-20c8f0ed5b5f	ulvluulv	2/22/22 10:03	التحديث الاخير				en	sa	sab-mobile	I cannot transfer to another beneficiary within SABB, as the program hangs when clicking on the beneficiary's name and does not open for transfer. This is very bad, and it was your responsibility to test this update before introducing it.	ar	transfer another beneficiary within sabb program hang click beneficiarys name open transfer bad responsibility test update introduce	Negative	App Store	1	1	1
App Store	701fabd1-7149-4e52-a2ab-fe12b8c6d52e	Dr.Joma	2/21/22 11:52	موقع فاشل				en	sa	sab-mobile	It hangs when transferring from one account to another in a local bank.	ar	hang transfer one account another local bank	Neutral	App Store	0	0	1
App Store	da5ddec2-166d-4a8f-ba85-4eb6dda52544	Baker Mustafa	2/19/22 3:58	مراجعه التصميم الاخير				en	sa	sab-mobile	The old design is much better and more beautiful than the latest design... It is supposed to be updated for something better, not for worse... Please reconsider.	ar	old design much good beautiful late design suppose update something good bad please reconsider	Positive	App Store	1	0	0
App Store	5ce4cb2c-faac-42ea-b5fa-131943c6b197	meron78	2/15/22 9:54	التحديث الجديد				en	sa	sab-mobile	The new update is very flexible and easy, and the interface is even better.	ar	new update flexible easy interface even good	Positive	App Store	0	0	0
App Store	e21b1625-29a6-4270-8f44-3c1dea28fb07	ihope2i	2/14/22 22:33	بحاجة للتحسينات				en	sa	sab-mobile	When opening some services for the cards, the application hangs and does not continue the process even after reopening the application. Please solve the problem.	ar	open service card application hang continue process even reopen application please solve problem	Negative	App Store	0	1	1
App Store	00cb2907-ab4f-459e-ae5e-fc89b9857e50	صمود٤٥٥٥	2/13/22 21:32	التحديث الجديد سيئ				en	sa	sab-mobile	Unfortunately, the new update is bad and it hangs. The login interface is old and not concise like before. Initially, the application was very smooth and easy. The login and password were on the same page. Now, the system is old and the interface design is old as well, and it hangs. How can this update be so bad? I wish you would go back to the previous version, which was fast, smooth, and had a …	ar	unfortunately new update bad hang login interface old concise like initially application smooth easy login password page system old interface design old well hang update bad wish would go back previous version fast smooth beautiful design bad	Negative	App Store	1	0	1
App Store	8162cbca-1e76-473c-9772-bb51f710e3d6	b1443245	2/12/22 9:14	مشاكل كثيره في التحديث الجديد				en	sa	sab-mobile	After the update, the application is not working properly!	ar	update application work properly	Negative	App Store	0	1	0
App Store	8fba6776-15db-4aca-a2e3-2e74f100281f	mubarak778	2/5/22 1:41	ملاحظه				en	sa	sab-mobile	If I am able to change the mobile number through the application, we would be grateful.	ar	able change mobile number application would grateful	Positive	App Store	0	1	0
App Store	3c69da34-3d49-44b4-a6c2-1089b2247122	ابو بدر الغامدى	6/9/23 12:43	الرياض حى الخليج شارع ابو المعالى النيسابوري				en	sa	sab-mobile	3522	und		Neutral	App Store	0	0	0
App Store	ecfe13dd-f65f-4816-bfd2-855c84b633d1	ابراهيم زين	3/24/23 11:32	سهل وممتع بس ياليت يتسرع شوي اكثر				en	sa	sab-mobile	Easy and enjoyable, but I wish it would speed up a bit more	und	easy enjoyable wish would speed bite	Positive	App Store	0	0	0
App Store	a877d1a9-30c6-4a7c-b63b-90a70a8ddb19	saleh22hh	1/25/23 12:41	Saleh22hh				en	sa	sab-mobile	5	und		Positive	App Store	0	0	0
App Store	21d5fe08-8ff9-4d4e-942f-d47a56d10ede	Ala' Eltoukhy	2/9/22 17:53	لا انصح به				en	sa	sab-mobile	Very, very bad bank. I do not recommend it. There is no transparency, and the customer service is poor. The application is also very bad.	ar	bad bank recommend transparency customer service poor application also bad	Negative	App Store	1	0	0
App Store	73253ac4-7835-4dc8-b8af-9c1469fc7d74	Wadhadm	7/29/23 15:09	Outstanding				en	sa	sab-mobile	Outstanding	en	outstanding	Positive	App Store	0	0	0
App Store	b5a4e230-6c55-4bb3-bb5c-cbf1fad989c4	MidoKaram	7/24/23 14:18	iPhone 14 pro max, app does not work, says my device has a jailbreak!	{'id': 37934688, 'body': 'Dear Customer,\r\nSorry for the inconvenience; you may now use the app without incident.\nIf you have any future problems, please call us at 8001248888 or +966 114062800 from abroad.', 'modified': '2023-07-27T10:37:18Z'}			en	sa	sab-mobile	This has been going on for a month now, I have an iPhone 14 pro max, and there's not even a jailbreak available for this phone as far as I know, yet the app insists that my phone has a jailbreak and refuses to log in! I have stc pay and a ton of other banking apps and none of them ever stopped working like this!	en	go month iphone pro max theres even jailbreak available phone far know yet app insist phone jailbreak refuse log stc pay ton bank apps none ever stop work like	Negative	App Store	1	1	0
App Store	b15902bd-fb98-4612-ab83-9f165c7ce5f5	DPT612	6/23/23 3:53	Overall Okay				en	sa	sab-mobile	Satisfactory service providing. But meet to reduce the transfer charges to International Beneficiaries. SAR.46 bit more.	en	satisfactory service provide meet reduce transfer charge international beneficiaries sar bite	Positive	App Store	1	0	0
App Store	b39c5c31-ff7a-44ee-9b49-e7eb105885d0	Abdul2023	2/27/23 10:15	SABB mobile app				en	sa	sab-mobile	Itâs a great app which gives 0 or limit going to SABB branch.saving lot of time. Itâs an excellent app	en	great app give limit go sabb branchsaving lot time excellent app	Positive	App Store	0	0	0
App Store	ddbed6a5-8386-4bd8-a3be-f61cb29f5a91	nasermuhammad	2/26/23 9:08	Exceptional..!!!!!				en	sa	sab-mobile	Exceptional..!!!!	en	exceptional	Positive	App Store	0	0	0
App Store	7e91dc7b-641a-4848-a1f5-19a29b098285	Moe KSA	11/14/22 6:41	Improved				en	sa	sab-mobile	Improved	en	improve	Positive	App Store	0	0	0
App Store	f46bca18-ef78-4438-9fff-7b83c0aa2389	Ali Ali jutt	7/26/22 8:28	Good				en	sa	sab-mobile	V nycc	sk	v nycc	Neutral	App Store	0	0	0
App Store	689c9326-6b5f-4378-96cb-e79141bbfbc0	RDimz	7/27/22 7:17	Appointment booking				en	sa	sab-mobile	I was able to make an appointment for your Rawdah branch. 1st booking, when I arrived at the branch, input the booking code I received into your machine, âappointment not foundâ. 2nd day booking. Same thing. Fix this please. Or remove your booking appointment option.	en	able make appointment rawdah branch st book arrive branch input book code receive machine appointment find nd day book thing fix please remove book appointment option	Neutral	App Store	0	1	0
App Store	b24ccc3c-97e8-401c-958a-743bd5316b6c	abu abdullah israr	7/24/22 3:24	Me ahamd				en	sa	sab-mobile	Now Iâm using SABBMobile application believe meVery well working thanks for the sabb.net	en	im use sabbmobile application believe mevery well work thank sabbnet	Positive	App Store	0	1	0
App Store	a4d69cea-a16d-45b0-a678-acd9c9125c1b	Abuljawarneh	7/15/22 15:28	Perfect banking services				en	sa	sab-mobile	Perfect banking services	en	perfect bank service	Positive	App Store	0	0	0
App Store	a5c6fd39-f6f0-49c2-add7-7eeca2851028	Melfakhrany	6/23/22 23:39	Report a bug				en	sa	sab-mobile	Awesome App but there is a bug in international transfer support team please call me to explain 0544801030	en	awesome app bug international transfer support team please call explain	Negative	App Store	1	1	0
App Store	ba2a2862-8694-44ff-8c21-d7c7d2ff16ef	Engbanna1	6/3/22 15:16	Face ID				en	sa	sab-mobile	Whatâs the point of adding the Face ID feature if I am still requested to put in my password??!! Face ID should replace the need to put a password. Instead of password make it a 4 or 6 digits code!!	en	whats point add face id feature still request put password face id replace need put password instead password make digits code	Negative	App Store	0	1	0
App Store	b3097b7d-fb8b-4073-9fb7-dbc644d17e32	khan zadah	9/20/23 21:15	Excellent				en	sa	sab-mobile	Satisfied	en	satisfy	Positive	App Store	0	0	0
App Store	8b7b62d8-b210-46b9-a45b-8671bf3045d7	S y 22	3/5/22 13:20	Easy to use				en	tw	sab-mobile	Clear, easy and fast	en	clear easy fast	Positive	App Store	0	0	0
App Store	29c4ce6a-2528-4960-9749-fca1e2629cac	Ivan Ethan Ssemanda	9/5/23 3:45	Fantastic				en	ug	sab-mobile	Sabb Mobile made things easier ð«¡	en	sabb mobile make things easy	Positive	App Store	0	0	0
App Store	ce026d27-824e-447d-9c56-a3d3c792dee3	Forgiveness 565	9/16/23 10:46	Surprised !				en	us	sab-mobile	The latest update was the worst ever. It was perfectly working before it. After updating it two days ago itâs slow, too many errors massages for my request. Login is a torture & making transfer is another impossible issue with too many errors & failure & try again later massages!!!	en	late update bad ever perfectly work update two days ago slow many errors massage request login torture make transfer another impossible issue many errors failure try late massage	Negative	App Store	1	1	1
App Store	3ad91975-8829-4bbf-9cb5-38adb1c039cf	Saleh Alrumaih	8/10/23 7:20	Bad performance				en	us	sab-mobile	I couldnât pay traffic fine. Once selected the account the App goes into white screen and never come back. This version of SABB App is not performing well compared to the previous one. You need to do more troubleshooting before launching it.	en	couldnt pay traffic fine select account app go white screen never come back version sabb app perform well compare previous one need troubleshoot launch	Negative	App Store	0	1	0
App Store	dd092dde-ef07-409c-8f13-1211f1fa477f	MKX16	3/22/23 20:09	Latest updates were great				en	us	sab-mobile	Latest updates and additions were great.. very efficient and advanced services!	en	late update additions great efficient advance service	Positive	App Store	0	0	0
App Store	82823089-bbb5-4ab9-a9e7-e7be22f7ab52	mirzank	7/21/23 2:26	All giving error that device is jailbroken when it is not				en	us	sab-mobile	I keep getting the error this device is jailbroken please use a certified device. My phone is Not jailbroken. I deleted the app and reinstalled and for a few days it worked. But then it started giving me the error again. Now reinstalling the app doesnât help. This started happening after I installed the most recent security update on iOS 16.5.1(c)	en	keep get error device jailbroken please use certify device phone jailbroken delete app reinstall days work start give error reinstall app doesnt help start happen instal recent security update ios c	Negative	App Store	0	1	0
App Store	b8a3c4d8-7bee-45af-afeb-df0c377935d1	hessalbawardy	3/14/23 13:55	Best bank in the whole world				en	us	sab-mobile	Every time are use Sabb bank application, I can assure myself that I will have a smooth experience	en	every time use sabb bank application assure smooth experience	Positive	App Store	0	0	0
App Store	56ac4bc3-5011-4e39-9bc6-aa34b65b48b8	Namar_Z	6/17/22 16:35	soooo laggy and slooow				en	us	sab-mobile	sooo laggy and very very slooow and doesn't support apple auto filling passwords i get furious every time i wnat to make a money transfer and it takes me 10 minutes just to do a simple money transfer ð¤¬ð¤¬ð¤¬ not to mention that logging in is just another hideous disgusting experience it takes me 4 minutes just to log in !!!!!!!! i highly suggest ALRAJHI bank they have a great and very quick …	en	sooo laggy slooow doesnt support apple auto fill passwords get furious every time wnat make money transfer take minutes simple money transfer mention log another hideous disgust experience take minutes log highly suggest alrajhi bank great quick mobile app experience recently start transfer money app doesnt take second also provide quick log option let log less second	Negative	App Store	1	1	0
App Store	e085ca71-1116-415b-a19d-0612414f46dd	venkyreddy70	7/9/23 12:48	User friendly				en	us	sab-mobile	The new mobile app is very user friendly and I am enjoying it	en	new mobile app user friendly enjoy	Positive	App Store	0	0	0
App Store	db9f926f-f2b9-4d1e-bc97-d036bd394c61	ReviewerAAR	4/6/23 6:16	Best banking app in Saudi!				en	us	sab-mobile	Besides being easy to use, the app includes all the products virtually in one place - you never need to visit a branch	en	besides easy use app include products virtually one place never need visit branch	Positive	App Store	0	0	0
App Store	62d70863-b36e-49be-927b-649c54f259a8	Layoonaldrees	6/20/22 17:20	The old layout is better				en	us	sab-mobile	It has a lot of bugs and technical errors that need to be fixed. Confusing layout and icons are not as easy to find as before.	en	lot bug technical errors need fix confuse layout icons easy find	Negative	App Store	0	1	0
App Store	c2ef6a82-293f-4024-8924-f02fbbb6c131	Abdullah Alhargan	5/10/22 9:48	Senior Director				en	us	sab-mobile	Greeting The app is much better than the previous year, just if you add some statistics ð about the expenses it will be more better. Thanks ðð»	en	greet app much good previous year add statistics expense good thank	Positive	App Store	1	0	0
App Store	c58cb91c-e4fc-4797-a16e-c1ab4f8d9b86	Artemisia__	1/17/23 11:55	Perfect				en	us	sab-mobile	Perfect but the one con is that it has too many updates. Every single time I need to use it, I would have to update it first.	en	perfect one con many update every single time need use would update first	Negative	App Store	1	0	0
App Store	f30e7228-92b6-40a8-b1e0-58d6acb3ba02	Hoffman the Great	12/16/22 14:15	Amazing app				en	us	sab-mobile	Has everything you need. Didnât visit a branch physically in over 5 years.	en	everything need didnt visit branch physically years	Neutral	App Store	1	0	0
App Store	3644c3c3-c4c6-4290-a046-6ef8d51dea55	Baig Adeel	9/3/22 9:59	Excellent Application				en	us	sab-mobile	Thanks Sabb Bank for making banking easier and accessible. The application is really good and works perfectly.	en	thank sabb bank make bank easy accessible application really good work perfectly	Positive	App Store	0	0	0
App Store	b498fea8-7954-46ee-b219-ebc1bf3d16b3	JojoJames1994	10/23/22 5:48	Very well managed				en	us	sab-mobile	The Sabb 360 is a very good option and the UI is so simple to use....but I requested for a Credit card but no response from any staffs until now !	en	sabb good option ui simple usebut request credit card response staff	Positive	App Store	1	1	0
App Store	70daaa9e-db1d-462c-b17e-81e2acb1a713	Wijdan Al	8/9/22 18:57	Smart and simple				en	us	sab-mobile	The app is simple and easy to use, yet it covers all your banking needs	en	app simple easy use yet cover bank need	Positive	App Store	0	0	0
App Store	887f28e7-238d-4fd2-bad7-89336638d201	Safwanaa	7/21/23 14:00	Fast and Easy				en	us	sab-mobile	Recent update improved the application greatly and made it easier to perform the transactions.	en	recent update improve application greatly make easy perform transactions	Positive	App Store	0	1	0
App Store	3e6bdd10-3052-42e8-a647-a8d2c125a961	Mohammad I phone 8	7/5/22 6:11	International transfer				en	us	sab-mobile	Easy process The question about Reference not clear what does it mean	en	easy process question reference clear mean	Neutral	App Store	1	0	0
App Store	8a9b270a-2e01-4c1c-bb33-19892b058fef	aliengamez	2/11/22 16:11	How did this even happen				en	us	sab-mobile	Hello dear admins I have been using ur app for about a year now but when I did the new update it all of the sudden deleted my sabb account and it forgot it as well as if I donât exist plz fix this issue it really annoyed me to the point that I deleted it	en	hello dear admins use ur app year new update sudden delete sabb account forget well dont exist plz fix issue really annoy point delete	Negative	App Store	0	1	0
App Store	2890555d-6a5e-4ec5-bf84-151002a54a2e	rf15	2/27/23 6:44	Great functionality				en	us	sab-mobile	The app is great, it gives all necessary options	en	app great give necessary options	Positive	App Store	0	0	0
App Store	f89c27b8-230b-47cc-9347-23a9518f4083	FatimaFA	3/2/22 6:16	So much better!				en	us	sab-mobile	A lot clearer and faster than the old application.	en	lot clear fast old application	Positive	App Store	1	0	0
App Store	b91c2e56-30cf-4fb7-80dc-cf7802620aca	VIP frontier	2/19/23 11:43	Abdulkarim				en	us	sab-mobile	Excellent App. Where I can almost perform all needed operations and transactions with ease and simplicity Keep it up ð	en	excellent app almost perform need operations transactions ease simplicity keep	Positive	App Store	1	0	0
App Store	e7af65f0-032e-46e7-99f1-7c38a580253b	Ab FM	12/26/22 12:04	Good banking apps				en	us	sab-mobile	New version is better than older one	en	new version good old one	Positive	App Store	0	0	0
App Store	5acab288-e586-44c2-8aa1-5f22e69e7402	Dr.allone	8/27/22 22:23	Reliable				en	us	sab-mobile	More Reliable than before	en	reliable	Positive	App Store	0	0	0
App Store	46ab9b0e-44d9-4564-84ed-9779ba2280c7	carlosbejjani	11/26/22 11:32	Amazing				en	us	sab-mobile	Theyâre a good bank, their services both online and offline are amazing. Very welcoming environment.	en	theyre good bank service online offline amaze welcome environment	Positive	App Store	0	0	0
App Store	cae747b8-de67-45c6-a5f0-1351d5ea97e8	Sanad Sanad Sanad	4/25/22 14:31	Bad new version				en	us	sab-mobile	The new version of the app is so un-user friendly. The application has so many many moving parts and unfunctioning bottoms. The older version is way better and simpler. I use multiple banking applications, SABB's older version was the best on in my list, now it's unarguably the worest.	en	new version app unuser friendly application many many move part unfunctioning bottom old version way good simple use multiple bank applications sabbs old version best list unarguably worest	Positive	App Store	1	0	0
App Store	b725fcd6-0de8-48b1-95c2-b3a8c9590751	iAhmed	4/18/22 19:42	New update				en	us	sab-mobile	Itâs getting better with time.	en	get good time	Positive	App Store	0	0	0
App Store	3b04d5dd-50c8-4704-ab05-57557b0f59ba	Mr_diesel	5/12/22 13:23	Good update				en	us	sab-mobile	This update is better than the older version Now its fine	en	update good old version fine	Positive	App Store	0	0	0
App Store	6cd5812b-8430-44cf-b51d-5780aa3f515e	Ramisizzle	12/24/22 6:28	User friendly				en	us	sab-mobile	The app is super great and Itâs user friendly	en	app super great user friendly	Positive	App Store	0	0	0
App Store	27893e6b-f0a6-46c3-8d40-6c8cc34f511c	ابو قاسم الخطيب	7/18/23 7:02	Good experience				en	us	sab-mobile	Nice , smooth and give full services	en	nice smooth give full service	Positive	App Store	0	0	0
App Store	015a4920-a83b-4f14-ae36-b2b20c61a656	Hamad Saudi	6/7/23 11:03	Best Bank application and easiest to use				en	us	sab-mobile	Easy to use and secure	en	easy use secure	Positive	App Store	0	0	0
App Store	9ed35b47-a34c-4d91-ab69-a89cbc0575a6	sabb bank client	12/8/22 0:04	They ask for ur location	{'id': 33784805, 'body': 'Dear customer, To increase the level of security in SABB Mobile app and to protect you from fraudulent attempts, we are requesting your geolocation to track any unusual activity on your account', 'modified': '2022-12-18T09:53:06Z'}			en	us	sab-mobile	Forcing clients to disclose their location every time they use the app and also , the app wonât work if it VPN is active . There is a big question mark for privacy and data security for the bank clients	en	force clients disclose location every time use app also app wont work vpn active big question mark privacy data security bank clients	Negative	App Store	0	1	0
App Store	310378b6-9a07-4bb3-a382-34ab1b4ff015	Aalhazza	9/10/22 20:44	AMH				en	us	sab-mobile	Excellent much better than the old one and very very nice looking	en	excellent much good old one nice look	Positive	App Store	0	0	0
App Store	7cf0f966-2b3a-4101-8e40-df7afe77aadd	Tamim1230	3/5/23 8:19	Banking app				en	us	sab-mobile	Very user friendly app. Thank you.	en	user friendly app thank	Positive	App Store	0	0	0
App Store	6a4d81c9-7239-4a6e-9933-3d4e946ae6d6	Kokayadp	5/26/22 6:22	Perfect				en	us	sab-mobile	Actually more than perfect	en	actually perfect	Positive	App Store	0	0	0
App Store	09123d4c-fbd3-4891-9b2b-dc797c31ff89	airmax768	4/21/22 9:02	Good app				en	us	sab-mobile	Would be nice if there was a live chat option for questions.	en	would nice live chat option question	Neutral	App Store	1	1	0
App Store	fe11fa45-5007-419f-ac01-807d5e52dcc6	albahrani habib	11/11/22 11:06	Thanks				en	us	sab-mobile	It was easy to use and fast	en	easy use fast	Positive	App Store	0	0	0
App Store	a1d37e6a-3e70-41a3-aab9-34d7f58ba2bc	AMANSA85	1/21/23 11:09	Good services and easy dashboard after all.				en	us	sab-mobile	Totally Satisfying.	en	totally satisfy	Positive	App Store	0	0	0
App Store	04442131-f6fd-4f39-b19a-52f9be441e94	S na nas	7/17/22 17:53	New look is malfunctioning				en	us	sab-mobile	Very slow in all processes Many crashes every single login This is going on for more than a week now My other iPhone applications are just fine!	en	slow process many crash every single login go week iphone applications fine	Negative	App Store	1	0	1
App Store	c69fcf2d-f724-446d-a85a-4e0b3ea50afa	NKDAR	3/25/23 21:42	Online banking				en	us	sab-mobile	Excellent and timely service.	en	excellent timely service	Positive	App Store	0	0	0
App Store	2bf1521f-777b-47be-94f5-9438d0fe9d4c	sailor man 1	10/25/22 16:06	Every thing perfect				en	us	sab-mobile	Every thing perfect	en	every thing perfect	Positive	App Store	0	0	0
App Store	5c35f4f1-3e35-49f5-a022-0f94e3dc45b2	Rakan Jam	7/27/23 22:37	The new SAB APP				en	us	sab-mobile	Much better than before but too many Authentication	en	much good many authentication	Positive	App Store	0	0	0
App Store	566aa0d0-a61d-4a5b-9cb4-92d9b9abc43d	noamanym	11/21/22 7:07	Easy app				en	us	sab-mobile	Very good app for quick banking	en	good app quick bank	Positive	App Store	0	0	0
App Store	8c5d2b81-e285-48d0-ab82-72c027273266	engraraza	8/3/22 10:31	SABB Online Aap				en	us	sab-mobile	User friendly and easily accessible. Thanks on continued support ð	en	user friendly easily accessible thank continue support	Positive	App Store	0	0	0
App Store	0487d680-5a63-49d0-ad02-9cd64f90d9dc	khayra.b	8/27/22 17:33	Awesome				en	us	sab-mobile	If this was from the merger, it was a great step in user experience. Proud of yâall :))	en	merger great step user experience proud yall	Positive	App Store	0	0	0
App Store	5ab401a3-8d14-4d0d-a965-a16575047fac	Fofod	11/7/22 18:53	Amazing improvement				en	us	sab-mobile	Theyre on the right track	en	theyre right track	Positive	App Store	1	0	0
App Store	c4f8b5e7-cf99-4b08-82db-02c96a24e82d	MrA1z	6/28/23 10:07	Horrible bank with horrible service				en	us	sab-mobile	Majority of features never work.. customer service is horrible. SAB is the worst bank in the world. I advise to stay far away and bank elsewhere.	en	majority feature never work customer service horrible sab bad bank world advise stay far away bank elsewhere	Negative	App Store	1	1	0
App Store	e3430cf9-6ba4-44dc-9fcd-7b60255785ff	Abo rghad	5/26/22 13:03	It’s bot working	{'id': 9449710, 'body': 'Dear SABB Customer, Please update to the latest version of SABBMobile application and try again, If this issue still exists please contact us and attach a screenshot of the problem with your contact information through the below email sabbcustomercare@sabb.com \nBest Regards, SABB Customer Care Team', 'modified': '2019-07-01T23:21:07Z'}			en	us	sab-mobile	Itâs really slowly and not working some time,itâs bad	en	really slowly work timeits bad	Negative	App Store	1	0	1
App Store	be797a9f-062f-4b17-b587-2cb519f97096	Meeno990	8/26/22 10:11	Nice design				en	us	sab-mobile	Nice design, little bit slow	en	nice design little bite slow	Positive	App Store	1	0	1
App Store	6f5de769-7904-47c9-999e-02f986625220	Mano89	6/2/22 8:39	Loving the Application				en	us	sab-mobile	Great Bank and application services	en	great bank application service	Positive	App Store	0	0	0
App Store	146d266d-135f-4abe-bafb-7938fb093954	Newaladdin	6/20/23 7:37	Ahmad Nassar				en	us	sab-mobile	The best online banking app ever and the best bank too	en	best online bank app ever best bank	Positive	App Store	0	0	0
App Store	f0dfd800-d7f0-418c-bb00-d7aae30ea148	Alshaibanii	7/16/23 8:42	Amazing				en	us	sab-mobile	Very super professional	en	super professional	Positive	App Store	0	0	0
App Store	0693b1d2-a5cf-4818-b2bb-12d04c25bfea	Azabunawaf	1/15/23 13:06	Good				en	us	sab-mobile	I loved my experience	en	love experience	Positive	App Store	0	0	0
App Store	24ac8d01-343c-4eff-8256-9e224c7b2686	Hussein O. A.	2/24/22 16:20	Beautiful new design				en	us	sab-mobile	Beautiful, simple and elegant	en	beautiful simple elegant	Positive	App Store	0	0	0
App Store	ad01b0a1-bebd-436c-a92c-a28237ff52c4	kareemtalaat89	11/14/22 10:40	Why do you want my location?				en	us	sab-mobile	I donât understand, this app needs your location enabled !! Iâm opting out and deleting this app	en	dont understand app need location enable im opt delete app	Negative	App Store	0	1	0
App Store	e06c04ef-5c46-4fc3-96f5-e455e9e4ce4b	Dk TX	4/20/22 21:57	The best app ever				en	us	sab-mobile	Amazing is not enough word for the app.	en	amaze enough word app	Positive	App Store	1	0	0
App Store	b5a18885-f0ef-4b51-aaa9-221fbf4f00da	archfahad	7/24/22 14:34	Thanks				en	us	sab-mobile	Itâs a great experience	en	great experience	Positive	App Store	0	0	0
App Store	44ee1adc-a32b-4e85-a990-ff0c67a7c72c	Butterfly ghost	11/7/22 18:58	Deleted				en	us	sab-mobile	Dear developer ^^ Forcing a client to share their location to use the app is just as saying â letâs spy on you dear client for your own safety â I wonât agree to that I would understand if you add it as a choice but not a must I will be using other options that shows more respect to my privacy Thank you	en	dear developer force client share location use app say let spy dear client safety wont agree would understand add choice must use options show respect privacy thank	Negative	App Store	1	1	0
App Store	6af76118-554b-4f83-ac26-b75f8ab22b09	mazen2018	5/18/23 7:19	Good				en	us	sab-mobile	More than good	en	good	Positive	App Store	0	0	0
App Store	5b5e8b99-ff0f-4ab4-b832-97dfaa8c2bd5	rojasael	2/17/23 17:00	Great app				en	us	sab-mobile	Great App, a little buggy but great	en	great app little buggy great	Positive	App Store	0	0	1
App Store	1e6678d8-792e-44b8-babb-5b70f57b4469	Maho007	1/23/23 18:32	Great App				en	us	sab-mobile	and one of the best banking apps	en	one best bank apps	Positive	App Store	0	0	0
App Store	e9013df5-1936-48af-93d3-5f3f3690a121	Dannosh81	8/24/22 11:46	Great app				en	us	sab-mobile	Easy, great and fast	en	easy great fast	Positive	App Store	0	0	0
App Store	4067bcef-1550-44ca-a868-f2b998f0c317	abdulmohsin022	3/2/23 5:30	Good like it	{'id': 33608901, 'body': 'Thank you for your feedback and rating.\n\nLooking forward to provide best services', 'modified': '2022-12-08T10:56:57Z'}			en	us	sab-mobile	Best application ever	en	best application ever	Positive	App Store	0	0	0
App Store	ef2d4ee3-ab73-4790-b66d-9ab8092cf602	iPhonedidouche	8/26/22 19:29	Very nice				en	us	sab-mobile	Very useful	en	useful	Positive	App Store	0	0	0
App Store	b250303d-ccc6-47b2-8ed2-a4375a26c122	AAW2030	2/17/22 2:27	Not working on IPAD				en	us	sab-mobile	The application is not working on IPAD and its messed up. No login screen ETC. SABB should develop an APP which is compatible with IPADs.	en	application work ipad mess login screen etc sabb develop app compatible ipads	Negative	App Store	0	1	0
App Store	a9e42aa2-7d19-4917-b092-fd16b86bf64d	richrdws	7/3/22 6:05	Review				en	us	sab-mobile	Very Easy to operate the Appsð	en	easy operate apps	Positive	App Store	0	0	0
App Store	41fe5f0a-f150-4b67-8373-2f6fd5a73ff7	aleyzy	3/14/22 2:19	Good morning				en	us	sab-mobile	Good morning	en	good morning	Positive	App Store	0	0	0
App Store	3505adf6-8d8e-473c-b393-3ecda37206fd	oammari	8/23/22 22:17	SABB Mobile App				en	us	sab-mobile	Great app for banking services	en	great app bank service	Positive	App Store	0	0	0
App Store	1738b103-97b5-4667-9464-93e153353a19	Ghl1974	6/17/22 12:40	Great app				en	us	sab-mobile	I love this app	en	love app	Positive	App Store	0	0	0
App Store	2db34c95-414c-4713-961d-d8e1a44ac8e3	Magicster12	6/29/23 8:18	Unknown				en	us	sab-mobile	Good app very helpfull	en	good app helpfull	Positive	App Store	0	0	0
App Store	0d346c37-537e-4e75-bd62-4aec0fc03fa7	همس القوافي	11/27/22 11:33	The best				en	us	sab-mobile	Very good and best App	en	good best app	Positive	App Store	0	0	0
App Store	ad14813a-7c38-4095-af36-a52c690230f7	Aziz000000	7/8/23 0:23	Great App				en	us	sab-mobile	Great app and seamless journey	en	great app seamless journey	Positive	App Store	0	0	0
App Store	9ecc2da8-5615-4062-b287-20d750d3e71a	Adel-h33	6/29/22 6:22	SABB application				en	us	sab-mobile	Good application recommended	en	good application recommend	Positive	App Store	0	0	0
App Store	81754306-7bd3-42bc-b0e9-054352382673	Hamzanet	5/3/23 20:14	The best bank in Saudi Arabia				en	us	sab-mobile	The best bank in Saudi Arabia.	en	best bank saudi arabia	Positive	App Store	0	0	0
App Store	6a97752a-5167-4ced-b202-393d61367e34	davidcago	12/23/22 15:36	Appreciation				en	us	sab-mobile	Appreciation	en	appreciation	Neutral	App Store	0	0	0
App Store	f3fbd841-c5c0-4900-94c5-d38cabf7f72e	ehq56	6/8/22 12:54	review				en	us	sab-mobile	its good and easy application..	en	good easy application	Positive	App Store	0	0	0
App Store	07d673b6-2aef-4c1b-80ad-2d5087674591	جساسيون	5/14/23 18:18	Could be better				en	us	sab-mobile	Not the best CX	en	best cx	Negative	App Store	0	0	0
App Store	2a14c66a-d531-42e7-8fd1-00e8b0bb35e0	abaubaid	4/28/22 21:42	abaubaid				en	us	sab-mobile	All was good ðð¼	en	good	Positive	App Store	0	0	0
App Store	c832f502-17ef-47f0-b6d9-d4784101db57	dr.fahad4s	5/29/22 0:21	SABB IS THE BEST BANK				en	us	sab-mobile	ITS REALLY TRUE EXCEPT FOR INTERNATIONAL BANK MONEY TRANSFER NEED MORE SUITABLE ELECTRONIC TRANSFER LOW COST FEE AND FAST TIME	en	really true except international bank money transfer need suitable electronic transfer low cost fee fast time	Neutral	App Store	1	0	1
App Store	99c0f756-0aa0-4829-94a9-c07c0cc843e1	tallo333	3/22/23 14:49	thanx				en	us	sab-mobile	thanx	en	thanx	Positive	App Store	0	0	0
App Store	59f0b46a-7338-4700-8fc8-e1af0adbd72c	B.M.R.K	9/12/23 8:50	BMRK				en	us	sab-mobile	best banking APP	en	best bank app	Positive	App Store	0	0	0
App Store	1c6e5c07-902e-41bb-aa4e-3c0657ffb0e9	ووووون	3/13/22 21:08	التحديث الجديد				en	us	sab-mobile	The new update feels like you've taken us back to 2010, it's not nice.	ar	new update feel like youve take us back nice	Negative	App Store	1	0	0
App Store	65350295-875e-44c1-a83f-86e72b7e0e10	yousef alsubaie	9/10/23 21:13	مهم				en	us	sab-mobile	There is a problem with the update, payment cannot be made or the code cannot be sent.	ar	problem update payment make code send	Negative	App Store	0	1	0
App Store	c2dd6585-745b-483c-b039-2dec774f357f	ابوسرور	9/7/23 14:10	سهل التعامل ، آمن جداً.				en	us	sab-mobile	Easy to deal with, very safe.	ar	easy deal safe	Positive	App Store	0	0	0
App Store	ff11e992-9ba3-45ff-ba18-2f85c148da63	saif220	8/29/23 0:15	ممتاز				en	us	sab-mobile	An excellent application in the truest sense of the word, easy, simple, and fast. I thank those who are responsible for it.	ar	excellent application true sense word easy simple fast thank responsible	Positive	App Store	0	0	0
App Store	9d2d904f-46fd-4c4f-9590-6077721fd51b	Yakoub11	8/14/23 12:49	روعه				en	us	sab-mobile	A unique, easy, and fast experience.	ar	unique easy fast experience	Positive	App Store	0	0	0
App Store	d83cc144-53fc-4c45-9a16-c1c394035334	fahooooodf	7/31/23 18:56	شكرًا جزيلا مع خالص الشكر والتقدير				en	us	sab-mobile	Thank you very much, with sincere thanks and appreciation.	ar	thank much sincere thank appreciation	Positive	App Store	0	0	0
App Store	17497d38-43cc-4002-bb2b-2599021a9f88	kkfert	7/25/23 11:55	ممتاز				en	us	sab-mobile	A wonderful experience	ar	wonderful experience	Positive	App Store	0	0	0
App Store	5bdb0873-1fe3-4f62-9ca2-68b7b30f1cb2	MOJ007	6/14/23 6:01	👍👍👍				en	us	sab-mobile	Excellent application, thank you.	ar	excellent application thank	Positive	App Store	0	0	0
App Store	e2dbdd41-87a5-4d84-b8d9-6033a37d4748	Eyadona	6/1/23 13:40	Best app				en	us	sab-mobile	The application is easy to use, smooth, and responsive. I am very happy with dealing with this bank.	ar	application easy use smooth responsive happy deal bank	Positive	App Store	0	0	0
App Store	2cf491a1-8264-453c-8a58-87a3e5fd9937	beso_00	6/1/23 11:11	التطبيق ممتاز				en	us	sab-mobile	Convenient, easy-to-use, and in continuous development application.	ar	convenient easytouse continuous development application	Positive	App Store	0	0	0
App Store	61ef92ca-e698-42d3-ab9c-47c1d633e1bf	Lulu5555	5/6/23 1:00	طلب تحديث المعلومات				en	us	sab-mobile	Every time I update my information, it shows me a successful update message on the mobile application, but every time I log in again, it asks me to update again! I went to the branch and updated the information, but I don't know what the problem is with the mailing address and the national address. They are the same, but it is not updating. Every time I click on the update button, it takes me bac…	ar	every time update information show successful update message mobile application every time log ask update go branch update information dont know problem mail address national address update every time click update button take back national address require go branch frustrate switch bank would good	Neutral	App Store	1	0	0
App Store	fdafa9e5-8f02-4c34-88f3-a3c862da6f68	War1400	4/27/23 3:54	القصيم - بريدة				en	us	sab-mobile	war14	id	war	Neutral	App Store	1	0	0
App Store	c9d132a1-1578-4564-9485-3390a558f049	laylahsh	4/16/23 10:54	تسجيل الدخول عن طريق نفاذ				en	us	sab-mobile	It has become harder and takes time.	ar	become hard take time	Negative	App Store	1	0	0
App Store	3db00d62-788a-4eca-a232-fd09c52d1b18	hani753	4/13/23 14:47	جيده				en	us	sab-mobile	You need to modify the login method to be faster and provide more clarification regarding loan details, such as interest and principal.	ar	need modify login method fast provide clarification regard loan detail interest principal	Neutral	App Store	0	0	1
App Store	c45b7325-7c4d-4cc3-9dee-88512994f0f4	Msms12345678	4/10/23 21:55	كل شهر تحديث ماسارت!!!				en	us	sab-mobile	Every month there is an update to what has happened!	ar	every month update happen	Neutral	App Store	0	1	0
App Store	4d11beb1-e91c-4145-bcf9-c45bf9cc6106	أبو سعد البلوي	3/18/23 8:12	حدثوا التطبيق				en	us	sab-mobile	The problem with the bank's application is that there are no quick login options. This is the most disappointing thing about the application, as it makes it boring and tiring.	ar	problem bank application quick login options disappoint thing application make bore tire	Negative	App Store	1	1	0
App Store	a4c68215-c08d-49b0-a449-211ee532e607	~SEA WOMAN~	3/2/23 11:09	رائع				en	us	sab-mobile	To more happiness and progress.	ar	happiness progress	Positive	App Store	0	0	0
App Store	73899389-bdd2-437a-a973-96422efed5ea	AzizFH	3/1/23 18:48	بعض التحسينات				en	us	sab-mobile	Thank you for your continuous support to the application. It would be great if a feature is added to display the cards digitally. Sometimes, I need to know the credit card information in an easier and faster way if I don't have the physical card. Adding an emergency cash feature.	ar	thank continuous support application would great feature add display card digitally sometimes need know credit card information easy fast way dont physical card add emergency cash feature	Positive	App Store	1	1	0
App Store	a31709a5-9d5a-4098-958a-7464a6d7da6b	ابوفيصل - السعوديه عنيزه	12/15/22 13:45	ممتاز				en	us	sab-mobile	Great!	ar	great	Positive	App Store	0	0	0
App Store	abd09d92-f0e6-47f4-b927-1202c7b351e1	aloshb	12/31/22 23:47	جيد	{'id': 33784797, 'body': 'عزيزي العميل, لرفع مستوى الأمان في تطبيق ساب موبايل و لحمايتك من عمليات الإحتيال قمنا بطلب تفعيل الموقع لتتبع أي نشاط غير معتاد من حسابك.', 'modified': '2022-12-18T09:51:52Z'}			en	us	sab-mobile	Why is it necessary to open the website to use the application?	ar	necessary open website use application	Neutral	App Store	0	1	0
App Store	680a3d0c-8ab6-4309-b165-1cfdd50fc547	Lemo 11	12/14/22 21:39	تفعيل الموقع أمر غير مقبول.	{'id': 33784798, 'body': 'عزيزي العميل,لرفع مستوى الأمان في تطبيق ساب موبايل و لحمايتك من عمليات الإحتيال قمنا بطلب تفعيل الموقع لتتبع أي نشاط غير معتاد من حسابك', 'modified': '2022-12-18T09:52:08Z'}			en	us	sab-mobile	It's strange that the app requests location activation!	ar	strange app request location activation	Negative	App Store	1	0	0
App Store	483edf37-b02c-4b4c-9366-639e6865ae4a	hamsalrooh	12/8/22 17:57	..	{'id': 33784801, 'body': 'عزيزي العميل, لرفع مستوى الأمان في تطبيق ساب موبايل و لحمايتك من عمليات الإحتيال قمنا بطلب تفعيل الموقع لتتبع أي نشاط غير معتاد من حسابك', 'modified': '2022-12-18T09:52:33Z'}			en	us	sab-mobile	Unfortunately, it has become bad.. Why does it ask for the location?!	ar	unfortunately become bad ask location	Negative	App Store	1	0	0
App Store	b9560173-3ae6-47f8-a28a-9ea9df1bae47	Abu.Daho0om	12/1/22 4:30	جدة	{'id': 33608858, 'body': 'شكرآ لك ونتطلع دائمآ لتقديم أفضل الخدمات ', 'modified': '2022-12-08T10:54:31Z'}			en	us	sab-mobile	Better than before	ar	good	Positive	App Store	0	0	0
App Store	fa3f85cd-52ac-41f7-864c-63714346d193	الحرمين	11/29/22 15:14	مكافاة المشتريات				en	us	sab-mobile	We want to increase the purchase points and make them attractive so that the customer continues to make purchases using Visa or Mada without using cash.	ar	want increase purchase point make attractive customer continue make purchase use visa mada without use cash	Positive	App Store	0	1	0
App Store	d0760078-7c3f-4c9f-8486-603a6c560ad2	ABUBASIL34	11/29/22 10:58	تطبيق رائع	{'id': 33608966, 'body': 'شكرآ لك على التقييم ونتطلع دائمآ لتقديم أفضل الخدمات ', 'modified': '2022-12-08T11:00:59Z'}			en	us	sab-mobile	I strongly recommend joining this wonderful bank.	ar	strongly recommend join wonderful bank	Positive	App Store	1	0	0
App Store	c9f6327d-285f-4f7d-b356-9069a845ac35	Ann_abdul	11/26/22 21:44	التطبيق له يومين مايشتغل ايش السبب؟				en	us	sab-mobile	"I am trying to access my account, but I am not receiving the confirmation code message. What could be the reason?"	ar	try access account receive confirmation code message could reason	Negative	App Store	0	1	0
App Store	78157c31-9019-45f0-8da9-21171faff334	B!zzyBone	9/25/22 14:06	عميلكم المحب				en	us	sab-mobile	Thank you for this program. ð«¶	ar	thank program	Positive	App Store	0	0	0
App Store	1f93dd32-9e8d-4e6a-9629-c74fbca8a855	برنامج بو كلبي	10/29/22 22:59	مهم جداً				en	us	sab-mobile	The application is slow and needs internet. The loading icon takes too long and its appearance is irritating.	ar	application slow need internet load icon take long appearance irritate	Negative	App Store	1	0	1
App Store	19177c86-efc4-4741-b55e-f3086bf7ce59	maawail	9/10/22 21:33	تطبيق جميل جداً ومطور				en	us	sab-mobile	creativity	fa	creativity	Positive	App Store	0	0	0
App Store	d4bd1ddb-02f5-4737-aba1-1e0477592c8b	Ola 2016	9/6/22 16:07	تطبيق ممتاز				en	us	sab-mobile	ðð»I recommend downloading it.	ar	recommend download	Positive	App Store	1	0	0
App Store	42fa5c6b-cce9-4bbe-9b97-a14cc30c971d	wazy 325011	8/27/22 14:30	👍👍👍👍👍				en	us	sab-mobile	Perfecto	es	perfecto	Positive	App Store	0	0	0
App Store	cc4daee4-2013-4ba8-91dd-33f1e4d4d24c	Sam.Sa	8/27/22 9:43	أفضل بنك في السعودية				en	us	sab-mobile	SABB Bank is one of the best banks in Saudi Arabia, and their application is excellent. They continuously work on its development without pause. Thank you, SABB Bank.	ar	sabb bank one best bank saudi arabia application excellent continuously work development without pause thank sabb bank	Positive	App Store	0	0	0
App Store	cbc3c855-181a-400b-8e57-8c6aa7b3c712	عبدالله محمد	8/25/22 7:29	ممتاز				en	us	sab-mobile	One of the best bank applications in terms of ease of process and method.	ar	one best bank applications term ease process method	Positive	App Store	0	0	0
App Store	759d0710-0d41-4fe8-9240-f31bb3e75d95	Basim Amoudi	8/9/22 10:43	رائع				en	us	sab-mobile	A qualitative leap compared to before, I liked it very much.	ar	qualitative leap compare like much	Positive	App Store	1	0	0
App Store	361bc585-683d-47f2-853f-b14d76736883	المحفظة الاكترونية	7/28/22 10:12	جدة				en	us	sab-mobile	May Allah bless you abundantly.	ar	may allah bless abundantly	Positive	App Store	1	0	0
App Store	311c6f5b-0c06-4c66-83ff-7fa34995cd80	المريسي1	7/27/22 11:04	ممتاز وسهل				en	us	sab-mobile	Very excellent and safe.	ar	excellent safe	Positive	App Store	0	0	0
App Store	fc176096-ed39-4dd6-b93f-9bbe46bd4520	kholood123	6/29/22 5:16	تطبيق				en	us	sab-mobile	Clear and easy to deal with ð	ar	clear easy deal	Positive	App Store	0	0	0
App Store	b7cf147e-8470-4da3-ab44-d9c7f49ccee1	Hrroo	6/27/22 11:13	Best				en	us	sab-mobile	Best bank	en	best bank	Positive	App Store	0	0	0
App Store	223022af-c17d-4268-a00a-9bdcb8f56d55	مجدي ابو الحمائل	6/26/22 23:12	ساب حياة أسهل ..				en	us	sab-mobile	Wishing you all the best of luck ..â¤ï¸	ar	wish best luck	Positive	App Store	0	0	0
App Store	dc872dcf-cf04-41f5-9743-bb573ee36f12	فوجي للمصاعد	6/22/22 19:08	لايعمل التطبيق بعد التحديث				en	us	sab-mobile	The application does not work after the update.	ar	application work update	Negative	App Store	0	1	0
App Store	602c1a91-d7ea-40a5-988d-5ac16df34705	al3blany	6/9/22 15:27	جميل ولكن ..!!				en	us	sab-mobile	Checking out is difficult And there are many steps Please simplify the checkout process in the application.	ar	check difficult many step please simplify checkout process application	Negative	App Store	1	0	0
App Store	755b6d9a-dcc5-4c3b-8e1f-c5bb31536060	Fahd9777	5/26/22 1:33	تطبيق رائع				en	us	sab-mobile	The application is easy, convenient, and constantly updated.	ar	application easy convenient constantly update	Positive	App Store	0	0	0
App Store	e107885d-f321-4374-8ab8-c86527dff81f	ي زينكم	5/18/22 20:11	جدة				en	us	sab-mobile	The best banking application.	ar	best bank application	Positive	App Store	0	0	0
App Store	4d18c3f4-6183-4448-89f9-730bcf90a5d4	خالد المصموم	5/12/22 23:30	تطبيق جيد جداً				en	us	sab-mobile	Everything I need as a customer is almost available in the app. Thank you, SAP.	ar	everything need customer almost available app thank sap	Positive	App Store	0	0	0
App Store	7dc8a3d4-6c72-4137-a2e2-98d5e71226f9	Osok851	5/8/22 7:02	تطور واضح في التطبيق				en	us	sab-mobile	There is clear development.	ar	clear development	Positive	App Store	0	0	0
App Store	6f4bd273-270c-4641-8570-5ae20af04f7c	naifhawaz	3/5/22 18:10	أفضل من السابق				en	us	sab-mobile	I wish for improvement and development.	ar	wish improvement development	Positive	App Store	1	0	0
App Store	972d8ffa-32b1-4d22-abfa-43cbc31484b5	سارا العريفي	4/27/22 1:30	تقيم				en	us	sab-mobile	Very bad programs, unfortunately.	ar	bad program unfortunately	Negative	App Store	1	0	0
App Store	66bf2189-e969-44dd-8255-136631155c45	zdn137	4/23/22 22:39	تعلموا التطوير من تطبيق الراجحي و mystc				en	us	sab-mobile	Learn about development and services from the Al Rajhi application, as no other Saudi bank can develop an application as impressive as Al Rajhi and my STC. Try to surpass them. ðð¼	ar	learn development service al rajhi application saudi bank develop application impressive al rajhi stc try surpass	Positive	App Store	0	0	0
App Store	cf5aa340-e1f1-4220-8cd2-ab340fd11824	na2an_al	3/4/22 8:52	تقييم ساب				en	us	sab-mobile	The previous interface is better.	ar	previous interface good	Positive	App Store	1	0	0
App Store	8a3a22e1-bea3-4f02-8368-0dadd90ea558	naan2948485	2/23/22 14:48	تطبيق جميل				en	us	sab-mobile	Luxurious, smooth, very clear and fast. This is according to my short experience, I hope to continue with them.	ar	luxurious smooth clear fast accord short experience hope continue	Positive	App Store	1	0	1
App Store	db7576f7-838c-49bc-9632-2a37b1b84856	SamiALFisaL@804808	2/22/22 21:52	👍🏻				en	us	sab-mobile	The application is beautiful and excellent, but it needs some improvement in some errors and the addition of some services, such as requesting credit cards, refinancing or applying for new financing, quick login, and adding points to earn inside the application itself instead of the link that takes you outside the program. Thank you.	ar	application beautiful excellent need improvement errors addition service request credit card refinance apply new finance quick login add point earn inside application instead link take outside program thank	Positive	App Store	1	1	0
App Store	cc8b011f-eff8-4638-93f5-41f2bc65bf48	HondoKatsu	2/17/22 15:49	最もシンプルな銀行システム。 多分。				en	us	sab-mobile	The simplest banking system. Maybe. No problem. Easy to understand. I am satisfied. Well done!	ja	simple bank system maybe problem easy understand satisfy well do	Positive	App Store	1	0	0
App Store	f0221a55-a7e3-4f72-a6bc-c9ebaa7b8fdf	Omaerko	2/17/22 16:03	يوجد مشكله في خانة التحويل نأمل حلها				en	us	sab-mobile	There is a problem with the transfer field. Please solve it as soon as possible.	ar	problem transfer field please solve soon possible	Negative	App Store	0	1	0
App Store	9770ea72-d6bb-4585-8219-d2c1e2efd393	ابوومحماس	2/12/22 20:03	الدخول السريع				en	us	sab-mobile	1- The latest update is slow in logging in. 2- The fast login feature using 5 digits is a fantastic feature that was in the First Bank application. I request adding it to the SABB application. However, the digits should be no more than 5, and verification should be done through Face ID. Please consider this note, and thank you.	ar	late update slow log fast login feature use digits fantastic feature first bank application request add sabb application however digits verification do face id please consider note thank	Positive	App Store	0	1	1
App Store	18f408ef-b24e-4c67-85b1-806f60f7c6e2	Ziyadoof	12/22/22 11:41	Three essential issues				en	us	sab-mobile	First, SABB mobile banking doesnât allow you to register more than one device. That is, if you have two phones and you want to access your account from one of them, you have to unregister the other one through phone call each time! Second, either on iOS or Android, each time you scroll down through your transactions, the moment a new set of transactions is loading the screen will drag you all t…	en	first sabb mobile bank doesnt allow register one device two phone want access account one unregister one phone call time second either ios android time scroll transactions moment new set transactions load screen drag way top annoy look fir specific transaction would scroll time load new content third enforcement activate geolocation justify security feature ridiculous would rather unsafe track le…	Negative	App Store	1	1	0
App Store	dd684ee1-3ca8-48ff-9946-eb0cf7c53629	Ernwill	2/24/22 13:43	Simplicity at its finest				en	za	sab-mobile	Live the redesign	en	live redesign	Neutral	App Store	0	0	0
App Store	b9ded678-266d-4c16-b31c-cfa6be1cb439	PatMdli	1/18/23 18:14	Mr				en	za	sab-mobile	Best	en	best	Positive	App Store	0	0	0
