# Supplementary material for: Retrieval-augmented generation analysis of user reviews in Saudi mobile banking apps: a comparative user experience study of iOS and Android
Source: PeerJ journal article supplement (doi:10.7717/peerj-cs.3565), 2026-02-06
Supplement: iOS.zip [file saib_final.xlsx]

## Sheet: Sheet 1 - saib_final
saib_final
source	review_id	user_name	review_date	review_title	developer_response	developer_response_date	thumbs_up	language_code	country_code	app_name	review_description	developer_response_date	en	cleaned_reviews	Sentiment	ï»¿source	Satisfaction	Effectiveness	Efficiency
App Store	6c7016f2-7864-4b7c-a793-25947a4a2585	ragyjd	7/6/23 12:17	Terrible				en	gb	saib	Terribly designed app. Very hard to use. Complicated!! I think the bank should consider fixing it just like other banks!!		en	terribly design app hard use complicate think bank consider fix like bank	Negative	App Store	1	0	0
App Store	8a8e9399-5bc7-4f38-add6-220de094d16f	maj hyd	2/21/23 2:47	Face unlock option				en	in	saib	Face unlock option not coming for iphone 14 pro max		en	face unlock option come iphone pro max	Neutral	App Store	0	1	0
App Store	36cb16bf-9d4d-4923-825d-0ce2804aad33	yyggjihvbiugvhu	8/2/23 20:05	The worst				en	it	saib	Worst		en	bad	Negative	App Store	1	0	0
App Store	efee4e77-27cb-4442-a662-7a48681effe7	abdulaziz902	3/18/23 13:43	Need a lot of improvements				en	sa	saib	I guess this is just a hyper application where you converted the website to be compatible as an application? Anyway the user interface/ experience needs a lot of work.		en	guess hyper application convert website compatible application anyway user interface experience need lot work	Negative	App Store	1	0	0
App Store	99ceaaf9-2b0c-4e6f-a556-232aac6c0578	djiffufj	8/2/22 2:14	It’s not how it’s looks				en	sa	saib	I saw the rating and I thought itâs impossible to do anything because of how bad the app is. I didnât even checked it out, if itâs bad or not. After time I got suggested to download it from the bank and the app is nice.		en	saw rat think impossible anything bad app didnt even check bad time get suggest download bank app nice	Negative	App Store	1	1	0
App Store	21f4e287-fd21-4052-b5ad-58d15dbccd9b	EAH10	6/23/23 23:33	Worst bank app!				en	sa	saib	Worst bank app! They think that the complex protection system will make the customer happier, while they are completely wrong. There are a thousand ways to make it easier for the customer to use the application in an easy and high protection manner without the need for all this complexity. Other banks have surpassed you by light years in technology, don't you think about catching up with them?		ar	bad bank app think complex protection system make customer happy completely wrong thousand ways make easy customer use application easy high protection manner without need complexity bank surpass light years technology dont think catch	Negative	App Store	1	0	0
App Store	b2393353-0610-4ef1-8138-2c6c36be37b2	Saleh yd	12/30/22 9:59	Not a good experience unfortunately				en	sa	saib	Using the website is better than the application unfortunately. Itâs a bad experience and very heavy app but as per your customer service in Twitter the new application will be there soon.		en	use website good application unfortunately bad experience heavy app per customer service twitter new application soon	Negative	App Store	1	0	1
App Store	6a6c807a-98c0-4dea-95a8-e2eff97883fc	Majeed9633	4/28/23 20:43	Vpn connection message error!!!				en	sa	saib	While traveling tried to access the app and the website it keeps telling me suspicious of accessing vpn while i was only connected to my mobile data, couldnât access my account through my whole trip !!!!ðð¼ðð¼ðð¼		en	travel try access app website keep tell suspicious access vpn connect mobile data couldnt access account whole trip	Negative	App Store	0	1	0
App Store	1fa76ef4-73bf-4709-a431-1b9bdedd255c	aaabbbccc223	9/10/23 7:05	Enhancement				en	sa	saib	The app need major enhancements on the user interface		en	app need major enhancements user interface	Neutral	App Store	1	0	0
App Store	7ff77499-3c41-40ae-884a-9e4cf41d7ec9	hyuitcvx	6/7/23 5:55	Very poor App!!!				en	sa	saib	More than 10 years with out any big change in design and the interface!! All banks apps has Face id since long, you guys donât have!! A big move is needed to update the look and feel of this App.		en	years big change design interface bank apps face id since long guy dont big move need update look feel app	Negative	App Store	1	0	0
App Store	70deae6a-3ca7-475b-b4e4-5606036b8945	akottayil	10/11/22 15:41	Cant make safe flex transfer				en	sa	saib	Even though beneficiaries can select from the lost, my account details is not loading.. transfer working smoothly from browser ..		en	even though beneficiaries select lose account detail load transfer work smoothly browser	Negative	App Store	0	1	0
App Store	0002fc01-494e-4505-8951-cda02410daa0	hu4hh	4/12/23 7:33	Bad User Experience				en	sa	saib	The app is bad and itâs not a user friendly. Itâs hard to use and itâs complicated. Suddenly, I couldnât log in and I canât reset my password. Itâs really complicated.		en	app bad user friendly hard use complicate suddenly couldnt log cant reset password really complicate	Negative	App Store	1	1	0
App Store	a0cb04b7-290c-4468-9d1d-1a3e85324dfb	djaiddj	6/20/23 12:01	Cant open account				en	sa	saib	Not possible to open bank account through app or online		en	possible open bank account app online	Negative	App Store	0	1	0
App Store	9f5009fe-6ecd-441e-939d-eda9dd6d8765	zgftg	1/22/23 15:26	Not recomend				en	sa	saib	I could not open the app for a long time, more than 2 months. Only saying there is a mistake, tray again later.		en	could open app long time months say mistake tray late	Negative	App Store	1	1	0
App Store	38ebdd9f-f234-4641-a609-3c6b6cd07132	Alyati	5/12/23 10:06	To Apple				en	sa	saib	Dear Apple plz remove the worst app for banking in the store as u can see the reviews here it has 1 star if there is option for 0 star they will take it		en	dear apple plz remove bad app bank store u see review star option star take	Negative	App Store	1	0	0
App Store	2c38dd33-eea1-4944-9467-0b6afdf9d941	Mohammad0.0	3/31/23 2:35	Disappointed				en	sa	saib	Itâs very disappointing ,how can big bank donât get attention for the application. (Behind all of other competitors)		en	disappoint big bank dont get attention application behind competitors	Negative	App Store	1	0	0
App Store	891d2927-ed10-402f-8c02-0eff3087ddae	AAlTamimi.com	8/1/22 7:40	5 stars				en	sa	saib	App is smooth and seamless!		en	app smooth seamless	Positive	App Store	0	0	0
App Store	64f09ac2-e05f-43f2-a526-fe6bd1a36971	aziz60029629	1/12/23 20:54	Useless application				en	sa	saib	You can use it once an year then the app down need more developments and updates		en	use year app need developments update	Neutral	App Store	1	0	0
App Store	f6ea57a2-94e9-4f1b-af5b-0abd20f4eb3f	Zahsalaam	11/25/22 11:12	New version not working				en	sa	saib	I canât enter my account. Itâs really disturbing and this is affecting me during travel and critical time.		en	cant enter account really disturb affect travel critical time	Negative	App Store	0	1	0
App Store	0eaf21da-de08-4ee7-a866-7f1dd552459c	Abdullah75a	4/24/23 0:30	Bad experience				en	sa	saib	Unfortunately using the face ID is so complicated! I wish to see SAIB has a better app worth of its stature		en	unfortunately use face id complicate wish see saib good app worth stature	Negative	App Store	1	1	0
App Store	f5292625-bf33-4207-9ed9-695eecef26da	ImmortalVeteran	11/21/22 4:47	Worst app				en	sa	saib	Doesnât log in almost all the time. They dont fix it. It is a total embarrassment.		en	doesnt log almost time dont fix total embarrassment	Negative	App Store	0	1	0
App Store	f18484c4-9030-471e-8e7c-361050c7e849	Mr.Unknown..	8/25/23 10:42	Super bad and slow				en	sa	saib	Bad design, bad login features, and the app is always laggy.		en	bad design bad login feature app always laggy	Negative	App Store	1	1	0
App Store	72777864-bb6d-4863-b39b-608a467cb8f0	kfgtE7	8/28/23 8:44	تحديثات غير مفيدة وغير عملية				en	sa	saib	Unfortunately every day is worse than before		en	unfortunately every day bad	Negative	App Store	1	0	0
App Store	fef435f6-e15e-4aaa-bbbd-a04e5aea4495	malak56789	8/10/22 13:12	Please SAIB change the app developer				en	sa	saib	Unstable, heavy, and I receive a lot of error messages!! This application is not suitable for the Saudi Investment Bank. It is unworthy of being a bank app.		ar	unstable heavy receive lot error message application suitable saudi investment bank unworthy bank app	Negative	App Store	1	1	1
App Store	e4c545d4-748f-4b3a-b428-b8b419f4c02e	Fdehlawi	11/4/22 18:16	Dead App does not work on iPad				en	sa	saib	Please update It used to work years ago Not now		en	please update use work years ago	Neutral	App Store	0	1	0
App Store	89c0383d-ab7a-4427-9b4f-ff8fa050abf3	Reem Almunimy	8/21/23 3:18	Too bad for a bank account				en	sa	saib	The worst application ever		en	bad application ever	Negative	App Store	1	0	0
App Store	26b60185-a4c7-431e-800c-8588d07fce1e	Userx0001	6/18/23 7:03	Worst Banking App I Ever Used				en	sa	saib	Iâm using multiple banking apps and this the worst banking app in Saudi Arabia.		en	im use multiple bank apps bad bank app saudi arabia	Negative	App Store	1	0	0
App Store	d777a738-8df5-4e17-aaaa-fa721452996b	Mohammed1241	3/21/23 9:03	Very bad application				en	sa	saib	You need to as hard as the alrajhi and alainma		en	need hard alrajhi alainma	Neutral	App Store	1	0	0
App Store	f591d9fe-e99d-4929-8c14-bb8d7e50c371	Bads1973	3/9/23 9:03	App not useful				en	sa	saib	The app canât work on the IPad. Thanks		en	app cant work ipad thank	Negative	App Store	0	1	0
App Store	fb714be0-dc24-44b9-a454-06fa1f52968c	HadiBaig	9/16/23 21:14	Errors				en	sa	saib	I can add a single flex beneficiary .		en	add single flex beneficiary	Neutral	App Store	0	1	0
App Store	0518b881-4cb4-4b74-8873-7ec1cb2c988e	Maximilano	3/16/23 17:05	Worst bank app EVER !!				en	sa	saib	Worst bank app EVER !! Always failure to sign in		en	bad bank app ever always failure sign	Negative	App Store	1	1	0
App Store	3df46feb-5400-4447-8ea6-3a6a34eef94a	ياسر التميمي	10/16/22 3:41	Bad App!!				en	sa	saib	ITâs heavy and Iâm not happy using it		en	heavy im happy use	Negative	App Store	0	0	1
App Store	fc6979b3-cb58-482f-9ba3-aea9c20b5097	Leo Shaker	7/28/22 12:59	Cant reset my password				en	sa	saib	This is the worst banking app i have ever had. I have been trying to reset my password for the past week but it shows an error message. I tried contacting Flex whatever and no response. They keep telling me to delete the app and download it again. Gonna take my money and leave them with their bs		en	bad bank app ever try reset password past week show error message try contact flex whatever response keep tell delete app download gon na take money leave bs	Negative	App Store	1	1	0
App Store	7f50a48d-d482-4d89-96a7-6a06ac16ccc6	Xg.c16	7/24/22 6:19	App does not let me log in				en	sa	saib	I tried deleting and reinstalling the app but still the same problem. I used different internet connection and also the same problem persists.		en	try delete reinstall app still problem use different internet connection also problem persist	Negative	App Store	0	1	0
App Store	8fdf9aaf-3eec-46ae-9caa-5b194ae29ab5	Zero Star46	4/24/22 12:26	Zero Star				en	sa	saib	The application is very slow and always broken and lagging. Even if I want to pay for governmentally payment, it gives me the wrong amount, I have no idea from where it is getting the values.		en	application slow always break lag even want pay governmentally payment give wrong amount idea get value	Negative	App Store	0	1	1
App Store	de844adc-d11d-4373-92d1-fe748531ad06	N/Al	2/27/22 9:59	Lag and not accurate				en	sa	saib	The app has been lagging for a while now, also the travel card shows wrong balance always. Please do something and fix it		en	app lag also travel card show wrong balance always please something fix	Negative	App Store	0	1	1
App Store	b220f595-f1df-4a67-a308-2b61d41025bc	Shakil7258	3/8/22 6:50	Worst App Ever				en	sa	saib	I am using the App since 6 years and since last year I am very frustrated with this app. On my Iphone 12 Pro Max it will hang with each and every function that i click on.		en	use app since years since last year frustrate app iphone pro max hang every function click	Negative	App Store	1	0	1
App Store	715f695f-41da-443e-9ba7-e8ff91da6830	Fouad392	3/16/22 19:59	Slow laggy				en	sa	saib	This app is a joke, it just open up a portal to the main website on mobile mode , its slow and laggy and need to be redesigned from the ground		en	app joke open portal main website mobile mode slow laggy need redesign grind	Negative	App Store	0	0	1
App Store	998cd537-3856-4d2f-9c5e-db69129115be	ahmadal$&	7/4/22 10:12	Terrible access!				en	sa	saib	Terrible access with countered many wrong access! You should make enhancements to retrieve similar versions in past.		en	terrible access counter many wrong access make enhancements retrieve similar versions past	Negative	App Store	1	1	0
App Store	26e41924-b10b-40ab-b0f7-aa92f84137e8	maaly a	5/3/22 13:13	So bad				en	sa	saib	I canât transfer money to the visa, the issue in all currencies! Itâs useless, each time i should do it from the website!! Which is not responsible for the traveler!		en	cant transfer money visa issue currencies useless time website responsible traveler	Negative	App Store	0	1	0
App Store	fd85734d-9436-4ca7-85b8-4febf48a6ecf	mesh_abdul	7/26/22 15:54	The worst bank App				en	sa	saib	This app is bad slow not working well they should see how AlRajhi bank develops their app and do the same, iam thinking to close my account for ever		en	app bad slow work well see alrajhi bank develop app iam think close account ever	Negative	App Store	1	0	1
App Store	00925d35-209d-4275-8e70-cc24f85ff422	ThamerAziz	5/29/22 10:16	Worst financial app				en	sa	saib	Totally not reliable nor supportive with a lot of technical issues.		en	totally reliable supportive lot technical issue	Negative	App Store	1	0	0
App Store	495aa5b3-fb84-4ec3-a9cc-a5d54dc9fab2	lil turtle xo	2/1/22 2:02	App toooo slow				en	sa	saib	Guys you have to learn from Al Rajhi bank		en	guy learn al rajhi bank	Neutral	App Store	0	0	0
App Store	be664d75-9f4f-48af-bf3b-d7b85b24c288	عبدالرحمن 92	1/16/22 18:09	Zero Star				en	sa	saib	If there is zero i will give zero		en	zero give zero	Neutral	App Store	1	0	0
App Store	0c64c4ad-c90e-448c-b87e-824f3220599c	iHassan89	4/2/22 22:05	👎🏻				en	sa	saib	Poor every day		en	poor every day	Negative	App Store	1	0	0
App Store	8747e01d-b547-4ede-bf4c-86d6634898b1	ADDDR1	3/13/22 9:41	Ab				en	sa	saib	Lagggggging all the time they do maintenance!		en	lagggggging time maintenance	Negative	App Store	1	1	1
App Store	0a0ec10e-7f2a-43d1-a948-21c8fa24ce8d	Abu1234q	6/19/23 0:41	فاشل				en	sa	saib	Hey, boy, do you feel like the programmer worked with his foot?		ar	hey boy feel like programmer work foot	Neutral	App Store	0	1	0
App Store	cd3268a5-858d-4007-adc8-1fb260bfaf10	Abdulaziz A.A	9/15/23 21:51	تجربة سيئة				en	sa	saib	One of the worst applications that can be used for banking services: Difficulties in implementing services. The pop-up notifications when using the application are annoying. Difficult to access the desired service. I hope to develop the application for the bank's customers and improve the customer experience.		ar	one bad applications use bank service difficulties implement service popup notifications use application annoy difficult access desire service hope develop application bank customers improve customer experience	Negative	App Store	1	0	0
App Store	f09a4ed0-3e82-47a5-9f26-3efd532eb489	ffffftyyuu	9/11/23 21:17	تطبيق جدا سيء				en	sa	saib	The application is very slow, as if you are accessing it through a web page. We hope you update the application with a new identity, like the new Al-Ahli, Al-Rajhi, and Alinma applications. Your application crashes, freezes, and is very, very slow. Frankly, we have been tired of you for years and nothing has changed in your application.		ar	application slow access web page hope update application new identity like new alahli alrajhi alinma applications application crash freeze slow frankly tire years nothing change application	Negative	App Store	1	1	1
App Store	820be313-df70-4f2d-8bf0-41fb0c3c06dc	abdulah911	8/29/23 22:49	تطبيق فاشل				en	sa	saib	The banks have reached the moon with their applications, and this is the case with their sleeping application that does not keep up with the current situation and is unsuccessful.		ar	bank reach moon applications case sleep application keep current situation unsuccessful	Negative	App Store	1	1	1
App Store	fad9266a-7ac5-4dcc-b5bc-acf5245870ff	Ttturkiii	8/28/23 6:16	😂				en	sa	saib	My dear, it's clear that those who are managing the application are employed through nepotism ðð I swear by Allah, the BlackBerry applications at that time were faster in terms of response and smoothness.		ar	dear clear manage application employ nepotism swear allah blackberry applications time fast term response smoothness	Neutral	App Store	1	0	1
App Store	6008800b-6811-4d7d-81dd-904e9bca7c8f	mohammed..........	8/22/23 15:36	تطبيق سيء				en	sa	saib	The application requests the PIN number for the card!		ar	application request pin number card	Neutral	App Store	0	1	0
App Store	211d5fd7-d204-47c1-bd4d-38c798570708	Sami sm	8/16/23 0:37	Sami				en	sa	saib	The application is bad, failed, slow, and has poor services.		ar	application bad fail slow poor service	Negative	App Store	1	1	1
App Store	73d7af7a-368f-4a0f-a279-9895d9357866	فكتور السفاح	8/13/23 7:57	عوار قلب				en	sa	saib	Banking apps are the most important apps on your phone that you may need in difficult and urgent situations, especially if you are outside the country and in situations where you need to access your account immediately without delay. However, you may find them not working and having technical problems most of the time.		ar	bank apps important apps phone may need difficult urgent situations especially outside country situations need access account immediately without delay however may find work technical problems time	Neutral	App Store	1	1	0
App Store	63a6aa83-5594-476c-8156-3affc72bd726	albaqass	8/11/23 11:08	الخدمه الالكترونيه سيئه				en	sa	saib	A very weak application that does not compete with other banking applications. I made a mistake once with my password and they locked my account for two days. Now I want to withdraw my money and get rid of this bank.		ar	weak application compete bank applications make mistake password lock account two days want withdraw money get rid bank	Negative	App Store	1	1	0
App Store	9df0adc7-018c-4309-a4b0-c220f8feba8c	imtestingurapp	8/8/23 17:55	تطبيق فاشل وخدمه عملاء افشل 👎🏻				en	sa	saib	The application always has problems, and the customer service is very bad. Imagine they shut their face in front of you while you are speaking!! I will withdraw my money and file a complaint to the central bank.		ar	application always problems customer service bad imagine shut face front speak withdraw money file complaint central bank	Negative	App Store	1	1	0
App Store	81bd2cda-8e0c-40c5-833a-1477d870e805	Arwa Abdullah N	8/7/23 10:12	يبي لكم تعديل كامل الهوية				en	sa	saib	The application has a strange stupidity. Come on, invest a bit in it and fix it like the other banks. No bank employees, no many branches, and no proper working website.		ar	application strange stupidity come invest bite fix like bank bank employees many branch proper work website	Negative	App Store	1	1	0
App Store	87a26e3f-a001-4c7e-beed-b8adbe9edc51	Faris suliman	8/5/23 21:34	👎🏻				en	sa	saib	The worst banking application that earns hundreds of millions annually! Still the worst application.		ar	bad bank application earn hundreds millions annually still bad application	Negative	App Store	1	0	0
App Store	d980a5d2-11f9-425c-9ef8-3010194782d5	Santanaxxxxxx	8/1/23 22:58	بقاله مب ابليكشن بنك				en	sa	saib	So that I can add a beneficiary, you guys are being awesome, man. Don't change, be like you are, keep moving and start.		ar	add beneficiary guy awesome man dont change like keep move start	Positive	App Store	1	0	0
App Store	df5e90da-e96b-4f01-a780-20b87fad3fd1	الكتركككككك	7/27/23 0:30	تطبيق سيء				en	sa	saib	An old application that does not meet the current standards, slow, and lacking features.		ar	old application meet current standards slow lack feature	Negative	App Store	1	1	1
App Store	0e0b173b-ced7-49d4-934a-e81db51e5b51	ارررمي	7/25/23 23:55	زي الزفت				en	sa	saib	The application crashed for an hour while trying to log in and another hour trying to open the homepage. ðð»ðð»ðð»ðð»ðð»ðð»ðð»ðð»ðð»ðð»		ar	application crash hour try log another hour try open homepage	Negative	App Store	0	1	0
App Store	5ddaafee-e96d-4c20-bdb4-d5b2032cfb9e	Big father	7/25/23 16:05	تطبيق سئ ولا يعمل				en	sa	saib	"The application is very bad and does not work on the iPad. The management responsible for the application is asleep in honey."		ar	application bad work ipad management responsible application asleep honey	Negative	App Store	1	1	0
App Store	943830cd-3698-4514-872c-0e934744136a	H2O__HANI	7/18/23 18:06	التطبيق يحتاج تحديث				en	sa	saib	The application is not working properly.		ar	application work properly	Negative	App Store	0	1	0
App Store	204d612e-abf5-4925-b7fc-9100fe3b9c98	abdulrazaqbit10	7/14/23 4:05	تطبيق متخلف				en	sa	saib	Very primitive and backward.		ar	primitive backward	Negative	App Store	1	0	0
App Store	156a13a6-372f-4cf4-8521-25ab47cb0bcc	Abohatm m	7/13/23 20:56	تطبيق فاشل				en	sa	saib	Complete failure		ar	complete failure	Negative	App Store	0	1	0
App Store	1da4ede4-c210-4af4-abd6-b04cf168ce26	عميل يتمنى انه لم يكن عميلا	7/8/23 13:00	فاشل				en	sa	saib	The application is not working and there is no currency search. Due to its many issues, the application is very bad. It needs a major development.		ar	application work currency search due many issue application bad need major development	Negative	App Store	1	1	0
App Store	867bcde1-becb-4fbf-9d86-030b5ca3ef86	malhazzaee	6/10/23 12:00	برنامج ضعيف				en	sa	saib	Unfortunately, the program is complicated and always crashes due to updates.		ar	unfortunately program complicate always crash due update	Negative	App Store	1	1	0
App Store	b1bebc54-420c-4ddd-94d4-92058e3c01ca	Draftsmanksa	7/7/23 10:46	تطبيق بدائي جداً				en	sa	saib	The bank is good in its branches and dealing with customers, but in this application, it is the worst application for services.		ar	bank good branch deal customers application bad application service	Negative	App Store	1	0	0
App Store	6ee231a3-b509-4bfd-87ab-d7d629e1eb8e	teemosby	7/6/23 8:16	اسوأ برنامج بنكي				en	sa	saib	The program is heavy and gets corrupted, and the service is very poor. The updates also further ruin the program... Come on, learn from other banking applications and fix your miserable program.		ar	program heavy get corrupt service poor update also ruin program come learn bank applications fix miserable program	Negative	App Store	1	1	1
App Store	1e745fbd-7341-4cb6-9307-bb839682a790	uniqueaziz	7/3/23 18:58	اسوء تطبيق بنكي على الاطلاق				en	sa	saib	A bad word is not enough to describe the awfulness of this application! What is astonishing is that they never even thought about the customers' feedback and complaints, whether in branches or through the banking phone service. The best solution, simply transfer your salary, balance, and all your transactions to another bank account (Al Rajhi is the best and also Alinma and Al-Ahli according to m…		ar	bad word enough describe awfulness application astonish never even think customers feedback complaints whether branch bank phone service best solution simply transfer salary balance transactions another bank account al rajhi best also alinma alahli accord experience excellent may allah reward patience use	Negative	App Store	1	0	0
App Store	1e33145c-7291-4ddd-be17-35b7ed12d14f	NaeemSaad	6/30/23 7:37	Very bad app				en	sa	saib	The application is very bad and has many technical problems. If anyone wants to travel, they should transfer their money early because the application will cause embarrassment and issues with transactions. The application is very slow compared to other banks.		ar	application bad many technical problems anyone want travel transfer money early application cause embarrassment issue transactions application slow compare bank	Negative	App Store	1	1	1
App Store	071067e0-ead3-4ffb-9b57-1706482304d2	Hm0d_iv	6/28/23 9:13	تطبيق لا يواكب التطبيقات الحديثة				en	sa	saib	Unfortunately, this application does not keep up with other modern banking applications. Additionally, the application has countless problems. Please develop a new application that befits Saudi Investment Bank.		ar	unfortunately application keep modern bank applications additionally application countless problems please develop new application befit saudi investment bank	Negative	App Store	1	0	0
App Store	c8f9a40a-2789-46d1-b150-794bf656c470	Milansta50	6/27/23 12:11	تطبيق سيء				en	sa	saib	Very bad application, unfortunately the application does not reflect the beautiful image that the bank is presenting. There are comments and technical problems that are not normal in the application, and unfortunately they are old problems and their solution is not good. I give it one star because of the services they offer, especially for travelers, but unfortunately the application does not all…		ar	bad application unfortunately application reflect beautiful image bank present comment technical problems normal application unfortunately old problems solution good give one star service offer especially travelers unfortunately application allow rate high	Negative	App Store	1	0	0
App Store	c01080f9-3128-46eb-a0bc-e683828622e7	اسوء لعبه على الإطلاق	6/26/23 10:39	اسوء تطبيق بنك مر لي				en	sa	saib	Always hanging and always getting error messages, not just for me but also for many other people. Fix your application.		ar	always hang always get error message also many people fix application	Negative	App Store	0	1	1
App Store	a2cc31a1-f57a-4291-a948-2f278a796c3f	Royal lord	6/25/23 11:13	والله زي الزفت مافيه اي تطوير للتطبيق زي الراجحي				en	sa	saib	It seems like applications from 2011.		ar	seem like applications	Neutral	App Store	0	0	0
App Store	b2cfd190-7324-46b3-9ec4-715eb5934287	IbrahimAlahmari	6/22/23 13:44	Saib app.				en	sa	saib	Technically weak application. Multiple times I log in and it gives me an error message saying "an error occurred, please try again later." Furthermore, It shows a balance amount that is different from the current amount, and when you try to pay, it says there is no balance. This problem often occurs outside working hours and on the weekends.		ar	technically weak application multiple time log give error message say error occur please try late furthermore show balance amount different current amount try pay say balance problem often occur outside work hours weekend	Negative	App Store	1	1	0
App Store	f4953c14-f4b2-40ec-b828-10a72d38652c	قبل المغيب	6/21/23 13:41	سيء				en	sa	saib	Stone Age application		ar	stone age application	Neutral	App Store	1	0	0
App Store	000cc0d8-6037-491f-b8d5-ec9645a612ae	ابو فهدددددددددددددد	6/19/23 16:05	تبوك				en	sa	saib	Very bad		ar	bad	Negative	App Store	1	0	0
App Store	c341cf5f-ac0e-4e70-9381-43aa19289b0b	Kskdnnol	6/18/23 20:35	معلق له فترة طويلة البرنامج				en	sa	saib	How long will this problem persist?		ar	long problem persist	Negative	App Store	0	1	0
App Store	04a0cf3c-a125-4daa-b8e2-2557617a95ef	A7med Alabdullah	6/15/23 21:39	تطبيق لا يليق ببنك				en	sa	saib	Its use for login and registration is modest and inaccurate, and it needs a minimum development or complete application change. If you cannot create a unique application, imitate another successful application. Ahmed Al-Abdullah.		ar	use login registration modest inaccurate need minimum development complete application change create unique application imitate another successful application ahmed alabdullah	Negative	App Store	0	0	1
App Store	3ad4696d-002e-4671-bb57-abe6a2f28554	hatemhamdi	6/15/23 12:58	خطا في التطبيق				en	sa	saib	The application gives a message to update later, try contacting the call center, a waste of time, blaming the employee. After suffering for four hours, take a screenshot and send an email!!!!!!!!! I do not recommend it at all, at all.		ar	application give message update late try contact call center waste time blame employee suffer four hours take screenshot send email recommend	Negative	App Store	1	0	1
App Store	bda2fcd0-f331-4c2a-9408-ce3eb40146b7	Anmn2023	6/11/23 11:29	سيء				en	sa	saib	The worst bank and the worst bank application in Saudi Arabia, always experiencing technical issues!! Very weak.		ar	bad bank bad bank application saudi arabia always experience technical issue weak	Negative	App Store	1	0	0
App Store	a6ea7d67-1cd6-4b65-88da-ebb6d1817579	اabdulaziz	6/9/23 10:59	اسوء تطبيق بنكي				en	sa	saib	The application is very laggy and heavy.		ar	application laggy heavy	Negative	App Store	0	0	1
App Store	9d3c52d4-c70a-4ea3-8e77-78c739c4b5eb	abdullah6736227	5/31/23 8:45	.				en	sa	saib	The application is very bad and it has a delay in logging in. Most of the operations are canceled due to a system malfunction. It is a failure.		ar	application bad delay log operations cancel due system malfunction failure	Negative	App Store	1	0	1
App Store	ac6b9ab6-b13e-42d2-9125-96724a6ca26a	مجطة	5/17/23 6:43	اضافة المستفيدين				en	sa	saib	"The application is a failure, it takes so long just to add a beneficiary. Every time I add a beneficiary, it resets on its own. What a disappointment!"		ar	application failure take long add beneficiary every time add beneficiary reset disappointment	Negative	App Store	1	1	1
App Store	81eee850-5015-487f-9dd3-b7401e917aba	moaddi1	5/21/23 18:02	تطبيق بنك سعودي ممتاز				en	sa	saib	I thank the organizers of the application.		ar	thank organizers application	Positive	App Store	0	0	0
App Store	12e43fdc-f456-4ef1-ab78-cb12678b7deb	ابو سطام الدعجاني	1/10/23 18:59	التطبيق يحتاج تطوير				en	sa	saib	The application does not meet nor match the quality and capability of Saudi Investment Bank. Other banks have released applications that are faster, more detailed, and clearer in terms of points, rewards, and other banking services. We kindly request that you develop and improve your application or release a new version that keeps up with the advancement.		ar	application meet match quality capability saudi investment bank bank release applications fast detail clear term point reward bank service kindly request develop improve application release new version keep advancement	Negative	App Store	1	0	0
App Store	1c64c2c6-7d7b-4202-9fb5-7e1aa7132e1f	fahadoberd	5/10/23 18:32	تطبيق فاشل دايم يعلق				en	sa	saib	Failed		ar	fail	Negative	App Store	0	1	0
App Store	9e98af97-2699-42df-949c-ab5e756e85d2	ايمان محمد سعيد	5/1/23 5:31	اسوء تطبيق				en	sa	saib	An application that raises blood pressure, I sit for two hours to change the password, and they have set up an automated silent response.		ar	application raise blood pressure sit two hours change password set automate silent response	Negative	App Store	1	1	0
App Store	414603b1-9a72-41b2-9492-2ddf063ede1e	Eyad 300	5/1/23 0:48	افشل تطبيق المصيبة لا كنت مسافر				en	sa	saib	Be careful and take precautions when traveling.		ar	careful take precautions travel	Neutral	App Store	1	0	0
App Store	82779686-b75e-418b-bb69-a8f1eb77244a	الحارثي احمد	4/28/23 17:44	غير عملي				en	sa	saib	It does not work and most of the time it hangs, and suddenly it repeatedly kicks me out of the application.		ar	work time hang suddenly repeatedly kick application	Negative	App Store	0	1	1
App Store	59b91d15-e0ea-48be-8216-e48a8acc57d5	الملكي24	4/27/23 3:08	التطبيق يحتاج الى تطوير كبير جدا				en	sa	saib	There is a problem with the application that has caused inconvenience for the customers. Please address the issue with the application and work on improving the customer experience.		ar	problem application cause inconvenience customers please address issue application work improve customer experience	Negative	App Store	0	1	0
App Store	6f8635fb-8186-4b33-9f31-590ca64afb92	ابراهيم بن عبدالله	4/24/23 19:03	بطئ جداً وسيئ				en	sa	saib	The application is very slow when logging in and updating banking operations?! The application doesn't meet the customers' expectations.		ar	application slow log update bank operations application doesnt meet customers expectations	Negative	App Store	1	1	1
App Store	dfaf53ee-220c-4b5e-b587-2b93594b5755	naif sul	4/23/23 13:05	تطبيق سيء جداً				en	sa	saib	Bad application, they force you to activate roaming service in order to access the application. Every time I try to access the application to perform financial transactions, it refuses with the excuse that I am using a VPN and I am actually outside the country!! All banking applications open easily, it shows their weakness in fraud prevention and their system is garbage.		ar	bad application force activate roam service order access application every time try access application perform financial transactions refuse excuse use vpn actually outside country bank applications open easily show weakness fraud prevention system garbage	Negative	App Store	1	1	0
App Store	5cf10315-b0f4-4efb-8ae2-482f417cbc2e	sam calboo	4/22/23 12:02	افشل تطبيق				en	sa	saib	"The worst bank application in the world and the worst customer service in the history of banks! It has been a month and the Flex Save feature still doesn't work. I have raised at least 6 complaints but to no avail! I have deleted the application and removed Flex Save more than 5 times, and I have done everything they suggested, but it still doesn't work!! May God not bless you, a bank of neither…		ar	bad bank application world bad customer service history bank month flex save feature still doesnt work raise least complaints avail delete application remove flex save time do everything suggest still doesnt work may god bless bank neither world hereafter	Negative	App Store	1	1	0
App Store	ad9837a5-a00f-41d4-982b-6e5f3b32a281	乂๛ MiMO ๛乂	4/12/23 1:55	تطبيق ممتاز				en	sa	saib	Everything is clear and the services are fast and organized. Contrary to all comments, success lies in continuity. ð¹		ar	everything clear service fast organize contrary comment success lie continuity	Positive	App Store	1	0	0
App Store	0d14a7e6-f1c9-43c3-8b3b-d3b20d2d3692	nohaaaiii	4/7/23 9:31	سيييءءء				en	sa	saib	Give him the award for the worst banking application. Congratulations.		ar	give award bad bank application congratulations	Negative	App Store	1	0	0
App Store	07f533e2-563c-4a9f-90fb-d46caeac179c	rmmmma7	4/5/23 19:33	سيء				en	sa	saib	It doesn't work on iPad.		ar	doesnt work ipad	Negative	App Store	0	1	0
App Store	f32022d0-aefc-411c-b56f-1182f176cb0e	ABrBr123	4/1/23 1:39	بنك زباله 😍				en	sa	saib	Trash bank ð		ar	trash bank	Negative	App Store	1	0	0
App Store	e5aa535d-ba08-4696-8a53-2fc0e3921470	غاده حمد صالح	3/30/23 23:49	سيء				en	sa	saib	The application usually crashes with me.		ar	application usually crash	Negative	App Store	0	1	0
App Store	b1e1523e-8345-4b0d-bb78-6ae3000c17e3	ابو نبراس ١	3/29/23 10:17	التطبيق سيء				en	sa	saib	The application is very bad and after the update, it became even worse.		ar	application bad update become even bad	Negative	App Store	1	0	0
App Store	67817100-3ee4-4894-906b-84cfb9e0477b	saudsror	3/28/23 19:16	البنك تعامله سئ				en	sa	saib	Very, very bad bank.		ar	bad bank	Negative	App Store	1	0	0
App Store	b596864d-90d9-4542-85c7-47812dca90a6	MohammadYK95	3/28/23 3:40	التطبيق سيء				en	sa	saib	It needs a lot of improvements.		ar	need lot improvements	Negative	App Store	1	0	0
App Store	b9cacb91-83aa-447c-a29a-535e4d04372d	عبدالرحمن منور	3/12/23 11:35	سيء جداً جداً جداً جداً جداً جداً جداً جداً				en	sa	saib	The worst application I have ever tried in my life. It is very, very, very bad.		ar	bad application ever try life bad	Negative	App Store	1	0	0
App Store	80ab6a1b-df42-4c9b-96ac-ba9475ba3911	ابو عااااااادل	3/7/23 23:00	غير معقول				en	sa	saib	A new customer in March 2023, and after reviewing the bank's services through the branch, application, and website, I am very shocked by the existence of such a bank among Saudi banks!!!!		ar	new customer march review bank service branch application website shock existence bank among saudi bank	Negative	App Store	1	0	0
App Store	6d14977b-f74f-4dba-8102-1303821eb5ac	شكرا لحسن التعامل	1/13/23 18:25	تعليقي				en	sa	saib	Very bad program and it has a lot of problems with login.		ar	bad program lot problems login	Negative	App Store	1	1	0
App Store	a8c50361-d4a4-42a6-bb16-0600d6b78695	Awad36	9/18/22 4:58	ما يفتح التطبيق				en	sa	saib	Every time I open it, it crashes badly. I hope you fix the problem so I can access banking services on my mobile.		ar	every time open crash badly hope fix problem access bank service mobile	Negative	App Store	1	1	0
App Store	4cd2e7f5-ec91-4fdb-a9c6-3a23ccd5ad0e	i.Sultan	12/24/22 15:51	Cannot access to my account				en	sa	saib	In the past, the program used to work well, but currently it is not functioning and most of the time it does not open with an alert saying "An error occurred. Please try again later."		ar	past program use work well currently function time open alert say error occur please try late	Negative	App Store	0	1	0
App Store	3e1f3473-6d11-42ff-b909-dfa991e400ef	09mm09	12/23/22 18:12	Meme				en	sa	saib	I want to understand why you conduct financial transactions updates from time to time.		ar	want understand conduct financial transactions update time time	Neutral	App Store	1	0	0
App Store	94d4c867-c578-41d6-83d2-072945693cac	Sinan7	12/15/22 21:55	BAD				en	sa	saib	Bad application and not up to par with the rest of the Saudi banks.		ar	bad application par rest saudi bank	Negative	App Store	1	0	0
App Store	d0f8a20d-8417-4583-b533-8f7a5edc3af5	wjejxjbwnsksojv	12/15/22 10:13	بنك فاشل				en	sa	saib	A failed bank with scammers. They told me there was an offer for financing, and when it was confirmed, they said customer service for the passport card is the worst. I don't recommend dealing with them.		ar	fail bank scammers tell offer finance confirm say customer service passport card bad dont recommend deal	Negative	App Store	1	0	0
App Store	c2876fb2-fa48-4074-bf04-9ded2738e4f9	faisalsal	12/7/22 5:22	تطبيق سيئ جدا ! 👎🏼👎🏼👎🏼				en	sa	saib	Very bad application, most of the time you cannot log in because it has a malfunction. You cannot benefit from it. I put my money in another account so I can make transfers easily. With this application, you can't do anything because most of the time it doesn't work properly. ðð¼ We hope they will pay attention to fixing the application.		ar	bad application time log malfunction benefit put money another account make transfer easily application cant anything time doesnt work properly hope pay attention fix application	Negative	App Store	1	1	0
App Store	6fc50bb9-a85c-4347-b174-783f1e337109	HussamT123	12/2/22 9:11	أسوء تطبيق مر علي				en	sa	saib	Worst application I have ever used. It doesn't deserve a star, but I gave it just so I can leave a comment.		ar	bad application ever use doesnt deserve star give leave comment	Negative	App Store	1	0	0
App Store	bd3412ec-7e11-4239-9710-55991c25cd22	Ali Alsaad	11/25/22 12:27	التطبيق لا يعمل ولا تصل الرسائل				en	sa	saib	How can a bank manipulate its customers in this way? I am traveling and your application is not working. What is the solution?		ar	bank manipulate customers way travel application work solution	Negative	App Store	1	1	0
App Store	f895e745-adcf-4c6d-800f-2710666c0fef	Abdullah s. Alqahtani	11/25/22 10:19	سواء جوده				en	sa	saib	It is very bad and in need of improvement, just like its counterparts.		ar	bad need improvement like counterparts	Negative	App Store	1	0	0
App Store	effea974-00b3-4412-b161-9c8db7dd89e6	bonobaid	11/9/22 16:49	اسوء تطبيق مر علي				en	sa	saib	A primitive, complex, unclear and slow application, even adding the beneficiaries' names only in English!		ar	primitive complex unclear slow application even add beneficiaries name english	Negative	App Store	1	0	1
App Store	d9836ee6-19b5-444c-b012-a83f76072cbc	Aatalturki	11/9/22 2:43	اسواء تطبيق				en	sa	saib	I don't think there is a worse application than this one. It's always crashing and under maintenance. Look for another field besides banks. That's my advice.		ar	dont think bad application one always crash maintenance look another field besides bank thats advice	Negative	App Store	1	1	0
App Store	750b7ddd-d01f-49cf-8d14-f8324fcfb9b9	faaloo	10/29/22 13:36	تطبيق معطل على الايباد				en	sa	saib	"The application does not work on the iPad. Can't believe that the bank is not aware of it."		ar	application work ipad cant believe bank aware	Negative	App Store	0	1	0
App Store	2379d2ab-6d2e-420c-9d96-f00cf45f751d	Sammmqahtani	10/26/22 10:22	Saeed				en	sa	saib	Bad application and bank		ar	bad application bank	Negative	App Store	1	0	0
App Store	50fb4032-1957-4a2e-8b91-8b7f4f032780	أبو قيان	10/23/22 11:44	خروج مفاجئ أثناء التسجيل				en	sa	saib	The application is very bad.		ar	application bad	Negative	App Store	1	0	0
App Store	a426ccf7-4a61-440f-b45c-f9569b778ff4	Raa3boob	10/19/22 21:10	انذار امني jailbroken				en	sa	saib	The device does not have any jailbreak programs on it, and I receive a message stating that the application only opens jailbroken devices.		ar	device jailbreak program receive message state application open jailbroken devices	Negative	App Store	0	1	0
App Store	6e1432c7-f035-49a8-b352-a5a77e64434a	zafranm	10/12/22 18:20	لا يعمل				en	sa	saib	It works excellently on Android but does not work at all properly on iPhone, very bad.		ar	work excellently android work properly iphone bad	Negative	App Store	0	1	0
App Store	375c9f9a-f083-4fd8-bd45-b31506476ff0	1419A	10/10/22 16:37	سيءء جداااا				en	sa	saib	Find a solution for us with the application, it is very very bad. Every time I try to log in, it gives me an error. I didn't benefit from the live streaming at all.		ar	find solution us application bad every time try log give error didnt benefit live stream	Negative	App Store	1	1	0
App Store	fc3db5a8-eaa0-4506-a76e-72670496d7c4	Aa123456*	10/10/22 10:53	تطبيق سي جداً				en	sa	saib	I cannot choose which account to authenticate until I receive the account statement, and secondly, please provide me with an old account statement.		ar	choose account authenticate receive account statement secondly please provide old account statement	Neutral	App Store	0	1	0
App Store	eb9243fc-e238-4fe0-a22b-416ac7d69087	Abdulazizas	9/29/22 11:51	اسوأ تطبيق بنك على الاطلاق				en	sa	saib	Very slow and does not work smoothly, and there is no customer service. One of the worst applications ever.		ar	slow work smoothly customer service one bad applications ever	Negative	App Store	1	0	1
App Store	ebdc26e9-ce64-412f-871a-819d5760f935	Saleh11111111111	9/29/22 5:04	تطبيق سئ				en	sa	saib	Unfortunately, the application is poor and slow for a bank of this size. I hope that the application is taken seriously and improvements are made.		ar	unfortunately application poor slow bank size hope application take seriously improvements make	Negative	App Store	1	0	1
App Store	6ca82232-7b52-4f07-b0a8-f641c8bdc1c7	Crazy____________[[____	8/3/22 19:10	الرجاء اضافه خاصيه الدخول السريع.				en	sa	saib	Please add the quick login feature and add the dark theme. Thank you.		ar	please add quick login feature add dark theme thank	Neutral	App Store	1	0	0
App Store	26ee008a-11d2-407c-a0cf-7d149d3b60c2	Aboferas20	9/16/22 15:06	من اسوء تطبيقات البنوك				en	sa	saib	One of the worst banking apps that hangs and has a very disgusting login process.		ar	one bad bank apps hang disgust login process	Negative	App Store	1	0	1
App Store	2351c454-a0c9-4dd6-b175-09a293e57840	M3zee50	8/15/22 12:42	التطبيق بدائي جداً وثقيل				en	sa	saib	The application cannot be easily used, as there is a constant lag and heavy usage, and it displays error notifications with numbers that have no relation to the client. In addition, the updates are very late, and the data update in the application is extremely, extremely, extremely bad.		ar	application easily use constant lag heavy usage display error notifications number relation client addition update late data update application extremely extremely extremely bad	Negative	App Store	1	0	1
App Store	6be27a2d-645c-4abc-b508-021a21add792	Bandar Al.	7/31/22 19:31	تطبيق سيء				en	sa	saib	Slow response. Technical errors. I hope it gets rebuilt like the Al Rajhi application.		ar	slow response technical errors hope get rebuild like al rajhi application	Negative	App Store	1	1	1
App Store	c45967ae-a848-4853-ba8f-63b43d900528	3bdullah009	10/19/22 11:17	Disappointing				en	sa	saib	Very outdated and unfriendly interface.. comparing the application to similar apps from other banks is like comparing a calculator to a laptop. Security: you canât use personal code or Face ID for login, still have to inter user name and password and security code.. Navigation: not easy at all Reward system: uselessâ¦		en	outdated unfriendly interface compare application similar apps bank like compare calculator laptop security cant use personal code face id login still inter user name password security code navigation easy reward system useless	Negative	App Store	1	1	0
App Store	cc59ba64-59f1-40cd-bef9-29d634368c4a	A/94	7/25/22 22:20	سيء				en	sa	saib	An application that feels like Minecraft ð¤¢ð¤¢		ar	application feel like minecraft	Neutral	App Store	1	0	0
App Store	b0708512-7b6b-4b77-8b96-1f4c2f5ee578	emanssa	7/22/22 0:39	ثقل في التطبيق				en	sa	saib	The application is very slow when it opens.		ar	application slow open	Negative	App Store	0	1	1
App Store	66691646-9a12-41f7-b884-fc87ed6c8d62	Fhd0_0	5/17/22 7:54	الخدمات				en	sa	saib	Honestly, I was surprised once because I needed a stamped IBAN and I had to go to the branch. I wish you could see how comprehensive Alinma Bank's application is with all its services. I hope they add them soon.		ar	honestly surprise need stamp iban go branch wish could see comprehensive alinma bank application service hope add soon	Positive	App Store	1	0	0
App Store	89665a06-9798-447b-bba6-8cc8d9826fa0	Ahmad Khafaji	7/20/22 12:41	سيء				en	sa	saib	The severity level cannot be predicted to the extent that I cannot login through the application, but I can login through the computer.		ar	severity level predict extent login application login computer	Neutral	App Store	1	0	0
App Store	fd4911b2-f3e1-4179-bf8f-e8cf5f10d03e	tr.mahdi	7/17/22 8:44	بطيء				en	sa	saib	Very slow and it lags, it should be improved for the better.		ar	slow lag improve good	Negative	App Store	1	0	1
App Store	046f6e0d-2bf9-452e-b048-99ceee29c9da	ibna.....	7/7/22 23:39	لايوجد				en	sa	saib	The application has many problems and it is not fast. It should be better than this.		ar	application many problems fast good	Negative	App Store	0	0	0
App Store	e11bc92e-93c8-40d9-b070-d0e0e3d089a5	288ياسر	7/5/22 8:31	سيئ بكل المقاييس				en	sa	saib	A very bad and very slow application. Anyone who has tried the Al Rajhi application knows the huge difference.		ar	bad slow application anyone try al rajhi application know huge difference	Negative	App Store	1	0	1
App Store	1362f5ae-e5c3-46a3-9e2c-8965c9d22210	بو سنف	7/2/22 8:26	Ibrahim				en	sa	saib	It's unbelievable! I have been using the application for 6 years and the response is still slow, heavy, and it hangs a lot. If it wasn't for the passport requirements, honestly, I wouldn't have used it.		ar	unbelievable use application years response still slow heavy hang lot wasnt passport requirements honestly wouldnt use	Negative	App Store	1	1	1
App Store	c0c0acc5-13f0-4f78-bdb4-5eae001b7268	RealSparda	7/1/22 18:32	قبيح وسيئ				en	sa	saib	A failed application, a very outdated system. How are you going to keep up with development with such a failed system like this?		ar	fail application outdated system go keep development fail system like	Negative	App Store	1	1	0
App Store	dda942ec-3b0c-4e95-afdc-368a74a3c6a3	x20f	6/29/22 20:59	بنك سيء				en	sa	saib	The worst bank you can see, my account has been frozen due to transfers from my accounts in other banks.		ar	bad bank see account freeze due transfer account bank	Negative	App Store	1	1	1
App Store	d1cf9101-e703-495b-8f56-f0018bed422f	وررط	6/29/22 7:23	حدث خطا				en	sa	saib	Every time I try to open my account, it tells me there's an error. Why?		ar	every time try open account tell theres error	Negative	App Store	0	1	0
App Store	7d7d360a-2284-4f71-a35a-33965e45a6ea	afaffsgsg	6/20/22 10:32	تطبيق بنك الاستثمار السعودي				en	sa	saib	The application is hanging and failing.		ar	application hang fail	Negative	App Store	0	1	1
App Store	fe177321-0848-413d-b480-127dec593c15	Queenjeje	6/12/22 12:02	سيء و معقد و بطيء!				en	sa	saib	Honestly, I want to delete my account with you because this app is completely useless! It hangs, it's slow, it doesn't open, and it takes at least five minutes to get the password! It's essential that you fix it because it's a disaster.		ar	honestly want delete account app completely useless hang slow doesnt open take least five minutes get password essential fix disaster	Negative	App Store	1	1	1
App Store	db1f1f25-54dc-4390-9a56-7a57faf96347	Fhd773	6/10/22 10:37	تطبيق فاشل وبطيئ جداً				en	sa	saib	Failed application and very slow.		ar	fail application slow	Negative	App Store	0	1	1
App Store	e979a0c3-db53-4997-9380-bc61981b5faa	turki -ksa	6/4/22 14:39	سيء للغاية				en	sa	saib	The worst banking program, congratulations. Your stock trading in the millions and a huge budget, yet you still manage to create a flawed program.		ar	bad bank program congratulations stock trade millions huge budget yet still manage create flaw program	Negative	App Store	1	0	0
App Store	0bab0855-d61f-4d58-a6c0-5ca4cc356ec1	aliz702	5/31/22 17:48	تطبيق مشاكله كثير ، أتمنى التحسين				en	sa	saib	ââ		und		Neutral	App Store	0	0	0
App Store	5abc34d5-919f-47a3-8e78-79ac7f547183	جبر السيمي	5/28/22 16:46	التطبيق سيء للغاية وتم رفع طلب لحل المشكلة ولم يتم الحل				en	sa	saib	The problem is the failure to receive the verification code.		ar	problem failure receive verification code	Negative	App Store	0	1	0
App Store	c7d15be9-e89f-4113-8cc1-715be02e8a11	مراااااااجع	5/27/22 18:44	الرياض				en	sa	saib	One of the worst bank applications that locked my account in the bank because of it.		ar	one bad bank applications lock account bank	Negative	App Store	1	0	0
App Store	0a2d25a4-cd9b-4417-84f8-5fe977d97e71	banderym	5/25/22 15:01	تطبيق سيئ ويحتاج لتحديث وتطوير				en	sa	saib	A very bad application that is not suitable for a big bank like Al-Invest. Its negatives are as follows: 1- The account nicknames cannot be updated after confirmation, and the name must be in English, otherwise, the user must be deleted and added again to modify the name. 2- The application is very slow in navigating between options. 3- The application needs more development, speed, and correctin…		ar	bad application suitable big bank like alinvest negative follow account nickname update confirmation name must english otherwise user must delete add modify name application slow navigate options application need development speed correct name bank example almasraf write bank vice versa necessary consider keep update bank applications facial recognition login must add password access application …	Negative	App Store	1	1	0
App Store	032df14b-5561-4b90-87dc-70d54e94606f	majeed8077	5/25/22 7:47	نتمنى تطوير				en	sa	saib	The program hangs and takes time.		ar	program hang take time	Neutral	App Store	0	0	1
App Store	9a464fd0-cfc2-4661-b129-8221b8475091	bn suliman	5/24/22 17:15	بطيء				en	sa	saib	I hope that the application will be developed as much as possible and thank you.		ar	hope application develop much possible thank	Positive	App Store	1	0	0
App Store	c44dd181-8187-4a40-9063-5bb5686d2295	a.alhumud	5/10/22 7:43	تطبيق بطيء ولا يفتح اول مرة				en	sa	saib	If you enter the application, you must receive an incorrect username or password, which is automatically saved. And if you enter, the place of the number (code) of the message is hidden. You have to go back and re-enter. By the way, this happens to me every time, even on Android. I left this bank because of their poor service and their points that, by God, come to you. Others are better, goodbye.…		ar	enter application must receive incorrect username password automatically save enter place number code message hide go back reenter way happen every time even android leave bank poor service point god come others good goodbye enter app store rate delete bye	Negative	App Store	1	1	0
App Store	7d813c4e-d664-4e79-be93-fee8da32413e	Almubrad	4/16/22 0:03	التطبيق سيء يجب تطويره				en	sa	saib	One of the best banks, but the application is very bad. Logging in requires multiple attempts because the authentication code box does not appear. It is slow in response and takes a very long time to navigate between services. To be honest, I am considering leaving the bank because of the application.		ar	one best bank application bad log require multiple attempt authentication code box appear slow response take long time navigate service honest consider leave bank application	Negative	App Store	1	0	1
App Store	6c574b88-c077-4907-a67c-3624f9ecdbb9	Ahmed1940	5/9/22 5:08	التطبيق سيء للغاية				en	sa	saib	The application is unresponsive and always hangs. It only executes commands after multiple clicks. I find executing operations through the website to be better. As for the application, it is extremely bad.		ar	application unresponsive always hang execute command multiple click find execute operations website good application extremely bad	Negative	App Store	1	0	1
App Store	7ac2f1e4-002a-479f-9a67-c094fe1655a6	NeMeR6688	5/8/22 15:46	التطبيق سئ				en	sa	saib	Is there really a bank at this level and this is its application?! I swear to God, if there was a worse rating than bad, I would have given it. The application is like you opened the website, I don't know how it works. I have already filed a complaint about the application, but no one is responding.		ar	really bank level application swear god bad rat bad would give application like open website dont know work already file complaint application one respond	Negative	App Store	1	1	0
App Store	b0e34fd2-c961-4438-a310-093bed6ac10c	har ahmed	5/7/22 6:07	بطاقة السفر				en	sa	saib	I am trying to add an amount to the wallet, but the system does not accept it. Please solve the problem.		ar	try add amount wallet system accept please solve problem	Negative	App Store	0	1	0
App Store	638e5067-d03c-4c2c-9f11-4a5917ae3ce5	moh-123456	5/5/22 18:24	خدمات التطبيقات				en	sa	saib	The application is very slow and unsuccessful, with all due respect.		ar	application slow unsuccessful due respect	Negative	App Store	1	0	1
App Store	f1234c32-7d03-4fef-b6d0-b14545e580a0	طلال ٤٢	5/3/22 3:14	فاشل				en	sa	saib	The application is mostly frozen.		ar	application mostly freeze	Negative	App Store	1	0	1
App Store	3c3b61eb-2c1f-4989-93d0-b8a8ddad1259	mohameed00	5/1/22 1:32	بنك فاشل للاسف التطبيق عطلان من ثلاث ايام ولانقدر نسحب ولا فيه استجابه حسبي الله عليكم				en	sa	saib	Unfortunately, the bank is a failure. The application has been down for three days and we cannot withdraw or get any response. May Allah hold you accountable.		ar	unfortunately bank failure application three days withdraw get response may allah hold accountable	Negative	App Store	1	1	0
App Store	8d46ff04-214c-4492-8106-cbed58ac3cab	SaadMao	5/1/22 0:05	اسوأ تطبيق بالعالم				en	sa	saib	I came to transfer the money and I have to transfer it now, but the application says they are busy with end-of-day operations. May Allah take revenge on them.		ar	come transfer money transfer application say busy endofday operations may allah take revenge	Negative	App Store	0	0	1
App Store	3e154cf3-bd5a-4108-866f-d16783eae885	fahad2007	4/29/22 12:39	تطبيق فاااشل				en	sa	saib	Failed application and a sleepy developer		ar	fail application sleepy developer	Negative	App Store	0	1	0
App Store	f45f97de-d1cd-46da-a30d-46560cf3108b	abaadi2022	4/28/22 23:29	👎👎				en	sa	saib	Very very very bad application.		ar	bad application	Negative	App Store	1	0	0
App Store	9cda4f57-4be2-4415-9e56-22c5a37b409a	عبدالله 166	4/27/22 21:59	غير مقبول				en	sa	saib	The application is full of problems and unfortunately, one has to log in multiple times to do something simple.		ar	application full problems unfortunately one log multiple time something simple	Negative	App Store	0	1	0
App Store	6786f270-1a6d-4def-bd4a-69dcabe860a7	rkko4	4/27/22 8:22	برنامج سيئ				en	sa	saib	It could have multiple meanings depending on the context. Here are a few possible translations: - It is suspended for 24 hours. - It is on hold for 24 hours. - It is postponed for 24 hours. - It is temporarily unavailable for 24 hours.		ar	could multiple meanings depend context possible translations suspend hours hold hours postpone hours temporarily unavailable hours	Negative	App Store	0	1	1
App Store	6c1e81b0-813a-49d3-9a8a-744dc65fc4a4	طووووط	4/26/22 22:57	البرنامج يحتاج تطوير				en	sa	saib	The program used to be one of the best programs in the past. Unfortunately, now it is slow in navigating within the program and it is also difficult.		ar	program use one best program past unfortunately slow navigate within program also difficult	Negative	App Store	1	0	1
App Store	bc3c0c59-be9b-43d7-afd5-01ffe8d1bc4a	Kiprit	4/25/22 2:27	التطبيق سيئ جدا				en	sa	saib	Application "Abu Kalb" is useless and the services are awful.		ar	application abu kalb useless service awful	Negative	App Store	1	1	0
App Store	f5dcf0eb-8a11-4d14-8abf-2d7270c9c921	Ali00707	4/24/22 17:24	بطيء وسيء بشكل مستفز				en	sa	saib	The bank is excellent, but the application makes you feel like you are in the year 1924! I don't know why it feels slow, irritating, and terrible, and it's a shame to have only one option in it. May God guide them.		ar	bank excellent application make feel like year dont know feel slow irritate terrible shame one option may god guide	Negative	App Store	1	0	1
App Store	9cd836b2-51b8-44c0-9e5d-65d0648991ac	Mine911	4/16/22 13:01	اسوء تطبيق				en	sa	saib	The worst banking application you can ever come across in your life, it's extremely slow and constantly crashes. The login code takes forever to load, and transactions appear in the account with a significant delay.		ar	bad bank application ever come across life extremely slow constantly crash login code take forever load transactions appear account significant delay	Negative	App Store	1	1	1
App Store	9b12dfb1-bf0e-44a1-b1a6-5e8c08c843f3	M.Alalawi	4/13/22 18:12	التطبيق لا يستجيب				en	sa	saib	The application is unresponsive and the authentication code box does not appear until the program is fully closed. Please solve this.		ar	application unresponsive authentication code box appear program fully close please solve	Negative	App Store	0	1	1
App Store	2df536da-7c0f-44cd-ae70-19c461ba3750	mansxR	4/9/22 23:58	أسوأ تطبيق بنكي في السعودية				en	sa	saib	The application is getting worse with time. If I leave the application running in the background and come back to it after two minutes, it asks me for a secret code to reopen, but it has never opened this way before. I have to completely close the application and then log in again. Now there is a new problem, when I try to log in, I cannot enter the code that is sent to me because the page does n…		ar	application get bad time leave application run background come back two minutes ask secret code reopen never open way completely close application log new problem try log enter code send page place input number zero star would give app terrible rat close account bank soon	Negative	App Store	1	1	0
App Store	d724c251-6f3b-4509-aa17-957772c87597	asu1033	4/8/22 10:47	التطبيق صار سيئ				en	sa	saib	The application was excellent, but unfortunately, it's getting worse every day to the point where I'm considering changing my bank completely.		ar	application excellent unfortunately get bad every day point im consider change bank completely	Negative	App Store	1	0	0
App Store	67f7c4b5-0d27-43fd-acd1-27c0afd598a9	سوسن القرشي	4/8/22 3:18	غاضبه				en	sa	saib	The application is not working at all and does not accept any banking transactions. It does not show the amount in my account! It tells me that there is no data to be displayed! And the banking phone did not help me! I am very angry and upset.		ar	application work accept bank transactions show amount account tell data display bank phone help angry upset	Negative	App Store	1	1	0
App Store	11cfe5cb-4b05-433a-b82e-b205ea41cbe2	vgyur	3/30/22 4:38	الرياض				en	sa	saib	Unfortunately, the program for quick conversion is very slow, and also when you enter, the login mode disappears, and you need to enter again to restore the mode.		ar	unfortunately program quick conversion slow also enter login mode disappear need enter restore mode	Negative	App Store	0	1	1
App Store	ddab4156-da7f-43a0-a49b-cd9e7337b777	£him$	3/31/22 17:44	تغيير رقم سري				en	sa	saib	If you want to change the password, I think you need to bring a clearance document.		ar	want change password think need bring clearance document	Neutral	App Store	1	1	0
App Store	b957a702-8223-42d0-a7ae-25e8ce5874c2	moath_226	3/30/22 17:17	سيء جداا لا انصح فيه				en	sa	saib	Bad, guys, I have been with them for 5 years and they haven't changed. Sometimes it doesn't let you enter the application. I do not recommend it, it's very bad. ðð¼ðð¼ðð¼ðð¼ðð¼ðð¼ðð¼ðð¼ðð¼ðð¼ðð¼ðð¼		ar	bad guy years havent change sometimes doesnt let enter application recommend bad	Negative	App Store	1	1	0
App Store	dbb4f7d4-5967-41d3-b6d3-c6d80c2421fb	.،؛:/-	3/24/22 13:09	بطئ شديد ضعف في التجاوب من قبل التطبيق طوال 5 سنوات				en	sa	saib	Extreme slowness and poor responsiveness from the application for the past 5 years, both inside and outside the kingdom. I have complained multiple times, but to no avail.		ar	extreme slowness poor responsiveness application past years inside outside kingdom complain multiple time avail	Negative	App Store	1	0	1
App Store	2f7a20db-271d-4b4d-a847-fe771ffd944d	LailaAlsahli	3/21/22 16:32	سئ...				en	sa	saib	A very bad application, unfortunately. It is the most application that frequently stops its services in order to develop, but from the time I subscribed to it in 2018, it has been and still is the worst application I have ever used.		ar	bad application unfortunately application frequently stop service order develop time subscribe still bad application ever use	Negative	App Store	1	0	0
App Store	1cb784a7-771b-4173-a383-51b6a6a5833a	aaaabdulrhmaan	3/21/22 1:17	التطبيق سيء جدًا				en	sa	saib	The application is very very bad and should be improved, otherwise it will lose a lot of customers.		ar	application bad improve otherwise lose lot customers	Negative	App Store	1	0	0
App Store	63a2c778-687c-4570-8742-0e041ffac521	اتباتتاتاتر	3/8/22 19:52	يحتاج إلى تطوير ومعالجة مشكلة التعليق المستمرة				en	sa	saib	This application is bad and always crashes. It's very strange for a banking app to be like this!		ar	application bad always crash strange bank app like	Negative	App Store	1	1	0
App Store	eef50b77-3b78-41ce-885f-d5f710a8e8a1	Reham.90s	3/19/22 18:04	ممتاز				en	sa	saib	One of the best banks in Saudi Arabia, I have been using their account for five years. Although the user interface is old, I can still do everything I need through the application. I have never visited a branch. I have tried other banks, but for everything except investments, I can do it myself without needing anyone's help.		ar	one best bank saudi arabia use account five years although user interface old still everything need application never visit branch try bank everything except investments without need anyones help	Positive	App Store	1	1	0
App Store	5b2b87a5-6111-4c99-b458-4df3a9259c33	احلى واحد في العالم	3/4/22 1:35	التطبيق سيء				en	sa	saib	The application is very bad and not smooth when navigating from one service to another. Unfortunately, they were notified via Twitter that the application is bad, but no one is responding.		ar	application bad smooth navigate one service another unfortunately notify via twitter application bad one respond	Negative	App Store	1	0	0
App Store	756308af-c0c8-4914-ac26-29374eca832b	MaramSSA	3/2/22 11:14	تطبيق قمامي				en	sa	saib	After four years of using the Kil Tatabeeh application, it has become a heavy and error-prone application. This includes the website, which can remain hours without working properly, and your money in your accounts is reserved, and you cannot use it because the application is frozen. And, despite all this, if you go to the branch, you will not find any employees to assist you, using the excuse th…		ar	four years use kil tatabeeh application become heavy errorprone application include website remain hours without work properly money account reserve use application freeze despite go branch find employees assist use excuse service become electronic haha	Negative	App Store	0	1	1
App Store	773a8e77-4d46-4a0c-9f73-17ca4409c077	مششششاري	2/22/22 14:02	فاشششل				en	sa	saib	Primitive application		ar	primitive application	Neutral	App Store	1	0	0
App Store	07f5159f-f6c0-4c0e-b3a4-286733acd553	dc32d414 jubail	2/27/22 17:50	الدخول السريع				en	sa	saib	We request the addition of a quick login feature with five digits, like other banks.		ar	request addition quick login feature five digits like bank	Neutral	App Store	0	1	0
App Store	6121f68d-2977-46e0-b063-0bf496b40085	Car X	2/8/22 12:53	سيئ جدا				en	sa	saib	One of the worst banking applications, it freezes, is slow, doesn't open, and until now there is no update for the program.		ar	one bad bank applications freeze slow doesnt open update program	Negative	App Store	1	0	1
App Store	e110f1a9-c7b2-4361-b1ab-966f484909cb	‏AwesomeB	2/11/22 17:11	The problem has been resolved				en	sa	saib	The problem has been resolved and it's now completed. You can try and enjoy the application. Stay well.		ar	problem resolve complete try enjoy application stay well	Positive	App Store	0	1	0
App Store	e4d22773-78af-4115-a710-f1c74395a2b3	Mr.Moraba3	1/24/22 9:37	التطبيق بطيء				en	sa	saib	Please fix the application or replace it with another one. The application is slow and dealing with it is more difficult than other banking applications. Please take advantage of other banking applications (Alinma, Al Rajhi, Arab National Bank, and others) as they are characterized by speed, smoothness, and ease.		ar	please fix application replace another one application slow deal difficult bank applications please take advantage bank applications alinma al rajhi arab national bank others characterize speed smoothness ease	Negative	App Store	1	0	1
App Store	88d68e0c-8753-4c90-80a4-aee1660bea02	ابا سراقه	1/23/22 20:32	مشكله				en	sa	saib	The application looks outdated and there is no fingerprint login.		ar	application look outdated fingerprint login	Negative	App Store	1	1	0
App Store	d4365d05-e3c4-42fe-8279-54703c86dadd	محمد ع الراشد	1/12/22 23:02	سيء				en	sa	saib	The program has a problem, it doesn't open. I have downloaded and installed it multiple times. Of course, the program needs development, adding fingerprint login instead of text messages.		ar	program problem doesnt open download instal multiple time course program need development add fingerprint login instead text message	Negative	App Store	0	1	0
App Store	4a02b3ee-eb59-4692-9ba4-a0b8c18e7125	Brkan505 KSA	1/9/22 4:13	بنك نكبة				en	sa	saib	Those banks have caused me a lot of trouble, may God take revenge on them. They denied me for 1800 riyals worth of tickets that I paid through their lousy payment system. The money didn't go towards the reservation and it didn't get refunded. I contacted customer support but no one helped me. May God not bless you.		ar	bank cause lot trouble may god take revenge deny riyals worth ticket pay lousy payment system money didnt go towards reservation didnt get refund contact customer support one help may god bless	Negative	App Store	1	1	0
App Store	5d92fb8f-c1e0-418f-9e6f-650a3fe0afcb	Fahad Bin K	7/21/22 21:19	تطبيق سييييييييييء 👎🏼				en	sa	saib	I swear to God, the suffering with this application. I have been trying to log into my account for an hour, and every now and then it gives me an error. If you don't want to fix your application, then teach us how to close our accounts and go to another bank.		ar	swear god suffer application try log account hour every give error dont want fix application teach us close account go another bank	Negative	App Store	1	0	0
App Store	066178cc-e06f-415d-9c80-49ed0f4f69d5	fjuikhufrza	4/19/22 11:53	Worst banking app				en	sa	saib	Hi, sometimes it doesn't open and gets stuck, and it's in a bad condition.		ar	hi sometimes doesnt open get stick bad condition	Negative	App Store	1	1	1
App Store	2c5b98e4-0be1-4ded-b3d7-8024efbe7d9f	az9231	5/3/22 17:31	Please i need your kind assistance				en	sa	saib	I have been trying to log in through the app on my phone but is not working anymore,but when i log in on the website it works normally whats going on with the app it shows me that i have been putting the wrong passowrd or username ID!! Please fix it or respond asap. Thanks		en	try log app phone work anymorebut log website work normally whats go app show put wrong passowrd username id please fix respond asap thank	Negative	App Store	0	1	0
App Store	4d59a090-4897-48bd-a08d-bfef4eb205dd	Alt4ir111	9/21/23 11:31	اسوء تطبيق بنك استخدمته				en	sa	saib	They should follow the services of Al Rajhi and Alahli Online banks. It's not reasonable for me to keep entering the username and password every time. They should make the login process faster and also improve the ugly menu design and the names. I will switch to another bank by the end of 2024 if they don't fix their application.		ar	follow service al rajhi alahli online bank reasonable keep enter username password every time make login process fast also improve ugly menu design name switch another bank end dont fix application	Negative	App Store	1	1	1
App Store	145ef146-2ca5-4e95-a7c4-0cf6be152771	GourmetSalad	3/26/23 17:05	Impossible to use for International transfers				en	us	saib	The international transfer option is just broken. It says I can't add this new beneficiary because "I already have a beneficiary with that nickname", but when I go to the beneficiary selection page, there is nothing. It's a genuine shame because I love SAIB's international card with no fees, and that part of the app works decent, but not this part. Please, TEST that everything in the app actually…		en	international transfer option break say cant add new beneficiary already beneficiary nickname go beneficiary selection page nothing genuine shame love saibs international card fee part app work decent part please test everything app actually work publish standard industry practice dont publish app break feature test bank much good apps youre gon na lose competition keep	Negative	App Store	1	1	0
App Store	f6a7f353-7dbb-41f6-b9bc-d4bdfa3dd7c2	rana_as123456	9/10/22 16:01	Supper slow				en	us	saib	I gave it two stars because you can manage many services through the application. However, the application is suppppppppper slow and keeps crashing :))))))))		en	give two star manage many service application however application suppppppppper slow keep crash	Neutral	App Store	1	1	1
App Store	38c98551-7f93-42bf-a00c-f1f722bde739	علي بن منيع	9/11/22 11:14	The bank is not as great as I know				en	us	saib	The app is so so much SLOW! Please fix that. It also prevents me from ordering El Saffer Card, and Cause issues by saving the rejected ordersâ wallets. The other thing I didnât expect the SAIB to do, is to cheat poorly as other banks do. SAIB fools us and lower their card withdrawal daily limit by about %50 to double the withdrawal fees!! We used to do $2500 for $6.9 few, but now we only can …		en	app much slow please fix also prevent order el saffer card cause issue save reject order wallets thing didnt expect saib cheat poorly bank saib fool us low card withdrawal daily limit double withdrawal fee use please set back disappoint	Negative	App Store	1	1	1
App Store	b40c70af-f937-4a3f-a7e5-e91f4656272e	FT_77	4/27/23 17:40	Not recommended				en	us	saib	The worst bank Iâve ever interacted with, unnecessary security measures that make it impossible to access your account whenever you need to, and on top of that youâll get your account frozen for no reason. I will not continue to use this app or this bank anymore.		en	bad bank ive ever interact unnecessary security measure make impossible access account whenever need top youll get account freeze reason continue use app bank anymore	Negative	App Store	1	1	1
App Store	e8fe085f-7d86-4b1d-ba95-eef84f9aa131	Silver wolf00	6/3/22 13:39	Needs to be fixed since long time				en	us	saib	The App keeps crashing at launch, and freezes and hangs up at many processes, The bank staff keeps saying it is working fine while it is crystal clear very bad and needs to be fixed.		en	app keep crash launch freeze hang many process bank staff keep say work fine crystal clear bad need fix	Negative	App Store	1	1	1
App Store	ba7b9de9-2be7-4c8d-838c-0b530c3e7c46	Caption essa	1/26/23 9:51	Bad service				en	us	saib	If I can give 0ero star I would. It needs an update. Slow process, glitches. I donât know what the IT teams of this bank are doing.		en	give ero star would need update slow process glitches dont know team bank	Negative	App Store	0	1	1
App Store	0cdabbd0-c874-4432-a589-ef92e3d09306	AsmaAZ	8/11/23 12:18	Privacy invasion				en	us	saib	Now you're asking for my location to use the app??? No thank you. won't work with it any more		en	youre ask location use app thank wont work	Negative	App Store	0	1	0
App Store	829a8c90-7967-46db-a767-539e7d6f8b07	محمد 	9/22/22 2:27	Fix your app!				en	us	saib	Youâre handling billions of SAR and this is your app? Completely pathetic. I regret the moment I chose to open an account with SAIB instead of AlRajhi!		en	youre handle billions sar app completely pathetic regret moment choose open account saib instead alrajhi	Negative	App Store	1	0	0
App Store	df86a114-ea54-448a-8237-bbd3db0faa32	JRaghad	9/17/23 8:58	International				en	us	saib	International use is the worst all it shows is error after error		en	international use bad show error error	Negative	App Store	1	1	0
App Store	48ec01f7-06c5-46ac-96eb-b68885d41690	Kiprit	6/18/23 3:52	The worst app				en	us	saib	The worst Bank app ever Thank you		en	bad bank app ever thank	Negative	App Store	1	0	0
App Store	8d9ec10a-7703-4713-8323-61bbda3266fc	Fahd Hassan S	4/8/23 21:07	Probably the worst programming I have ever encountered				en	us	saib	Programming is very bad. I have dealt with many banks and I don't remember any bank that had such poor programming.		ar	program bad deal many bank dont remember bank poor program	Negative	App Store	1	0	0
App Store	f5565e06-dfa8-404b-97a4-fefa823b72d3	Almoudr3	6/25/22 1:20	Need improvement				en	us	saib	The app have lots of bugs and is like old fashioned app as web pages. There are another competitor smaller bank with better app. This app is the same for last 7 years no change		en	app lot bug like old fashion app web page another competitor small bank good app app last years change	Negative	App Store	1	1	0
App Store	ace54fb6-63f8-4681-b47e-cf9849d29cdd	Khaledwas	4/28/22 12:52	Slow app				en	us	saib	The app is slow Sometimes it doesnât enable me to login		en	app slow sometimes doesnt enable login	Negative	App Store	0	1	1
App Store	d9418e4f-03c3-4e24-a26f-af783db2839e	sandtrabe	4/27/22 20:15	Can’t log in . Always not responding				en	us	saib	Canât log in . Always not responding		en	cant log always respond	Negative	App Store	0	1	0
App Store	f77c8ba8-f89c-4284-822a-bb78288e34ae	AbuFaHaD5	7/5/23 12:09	بنك محترم				en	us	saib	You need to develop the application.		ar	need develop application	Neutral	App Store	1	0	0
App Store	44208fe0-b21d-46f7-b6e1-6b3a4f8ac2cc	Bushra6382912638291739	9/5/22 19:30	أسوأ تطبيق بالحياة				en	us	saib	Bad ðð¼		ar	bad	Negative	App Store	1	0	0
App Store	a130c5ab-8e4d-441f-85b4-3c88ccf136c4	المجاهدةً	8/13/23 22:22	عن التطبيق				en	us	saib	The application is not working properly. I have been unable to log into the app for almost a month now. I have contacted customer service and visited the branch, but the issue has not been resolved. Every time, an error message appears saying "An error occurred, please try again later."		ar	application work properly unable log app almost month contact customer service visit branch issue resolve every time error message appear say error occur please try late	Negative	App Store	0	1	0
App Store	d5f46ac7-7297-4c5c-9b17-2a8128da49a4	ريان١١١	8/12/23 18:45	قسم بالله تركت البنك كله بسبب تطبيقهم				en	us	saib	A complete failure of an app, even if its programmers were paid a million and a half riyals, they wouldn't create a better app. Be careful not to rely on it abroad, my friend and critic.		ar	complete failure app even programmers pay million half riyals wouldnt create good app careful rely abroad friend critic	Negative	App Store	1	1	0
App Store	8c2065fa-25ff-4d0a-a3c1-144149f42aad	WADDA70	8/12/23 1:24	سي وبطي جدا				en	us	saib	Very slow and very low		ar	slow low	Negative	App Store	0	0	1
App Store	5653c4a5-3444-4e18-9d2d-6a7b0312eb8d	Khaledalenezi	7/7/23 21:13	سيء جداً قليلة في حقه				en	us	saib	User experience is one thing and this application is in a completely different world.		ar	user experience one thing application completely different world	Neutral	App Store	1	0	0
App Store	3f9c5bc1-2f8f-4240-985c-f0b8ed9f94f3	Sinidi	6/30/23 17:04	الرياض				en	us	saib	Needs development		ar	need development	Neutral	App Store	1	0	0
App Store	38baa664-2c23-4569-bf4a-23b9888b25b0	نتمنى الاهتمام بالتطبيق	6/29/23 14:51	Bad app				en	us	saib	I don't know why the program is not evolving to be faster in terms of login and icons. Now, I consider it one of the worst applications among Saudi banks. Similarly, the Flex Safe service is very bad. Every week, it asks me to reactivate it. I was traveling and got frustrated with the application; it wouldn't open. Thank God I have an account with another bank, and I managed my affairs. I hope to…		ar	dont know program evolve fast term login icons consider one bad applications among saudi bank similarly flex safe service bad every week ask reactivate travel get frustrate application wouldnt open thank god account another bank manage affairs hope take feature bank make improvements soon possible customers tend prefer fast smart electronic bank service hope take consideration	Negative	App Store	1	1	0
App Store	dc54844c-280a-41b1-a156-7009469df0de	اسمدخ	6/18/23 13:54	فاشل				en	us	saib	The application is bad, unsuccessful, and the Flex feature is rotten.		ar	application bad unsuccessful flex feature rotten	Negative	App Store	1	0	0
App Store	c810a53c-0e97-406e-8626-c3e77dd38207	الأسم المستعار مستعار	6/17/23 10:08	اعيدو الاصدار السابق او عالجو هذا الاصدار				en	us	saib	Our services have been disrupted with each update, causing more failures. Please revert to previous versions if you cannot resolve the issues with these updates.		ar	service disrupt update cause failures please revert previous versions resolve issue update	Negative	App Store	0	1	0
App Store	b7d3bd96-e3b3-4b87-9eeb-568b74a277f5	حوت الصغير	5/21/23 6:51	تطبيق لا يعمل				en	us	saib	Problem with the application, time of updating without notifying the user, resulting in an increase in ticket prices. Secondly, the fast entry service keeps malfunctioning, and I have to register again every time.		ar	problem application time update without notify user result increase ticket price secondly fast entry service keep malfunction register every time	Negative	App Store	0	1	1
App Store	396560ee-1629-45a3-89a3-42f9314395f4	𝐃𝐫𝐡 𝐀𝐋-𝐄𝐬𝐬𝐚	5/17/23 13:20	التطوير				en	us	saib	It's not reasonable how a well-known and famous bank has an underdeveloped application that is always lagging whenever I try to use it.		ar	reasonable wellknown famous bank underdevelop application always lag whenever try use	Negative	App Store	1	0	1
App Store	48b842a4-7cc7-442e-9959-b8b3da7d5195	dshopping782	5/28/22 23:15	خدمة البنك ممتازة لكن التطبيق بطيء جدًا واستجابه سيئة جدًا جدًا				en	us	saib	The application is great in terms of services, but it is very challenging to activate them. I had to log in five times to enter the application, and each time the verification code failed to work. Moving from the account to the cards or any service within the application takes up a lot of time, and I doubt if my phone freezes at the end because the application's responsiveness is very poor, unfor…		ar	application great term service challenge activate log five time enter application time verification code fail work move account card service within application take lot time doubt phone freeze end applications responsiveness poor unfortunately reliance applications first last quality application poor avoid use currently transfer financial transactions another bank application fast good hope take …	Negative	App Store	1	1	1
App Store	153dabbe-e5e9-4dea-b4be-21b98990a328	Husseinj	4/30/23 17:58	تطبيق سيئ				en	us	saib	The application hasn't been opening for three days and is not keeping up with the developments of other banks.		ar	application hasnt open three days keep developments bank	Negative	App Store	0	1	0
App Store	d36a7010-bd4f-4858-bf90-5c9a2a24983d	3umda	4/5/23 13:07	عيب				en	us	saib	Most banks have developed their applications, except for you... Learn from Alinma, Al Rajhi, and Alahli, flaws in a prestigious and excellent bank like yours should be rectified as soon as possible. Your application is primitive, gentlemen, and this is advice from a well-wisher, not a hater.		ar	bank develop applications except learn alinma al rajhi alahli flaw prestigious excellent bank like rectify soon possible application primitive gentlemen advice wellwisher hater	Negative	App Store	1	0	0
App Store	ffd5770c-eb8a-43fa-9d02-5258d74c0111	gared cox	4/1/23 2:00	اسوء تطبيق ممكن تستعمله لادارة حسابك				en	us	saib	I have been in America for a year and not a month goes by without the Saudi Investment Bank inventing a problem with my login. The software is very bad and technical support is even worse. They take days to respond to you.		ar	america year month go without saudi investment bank invent problem login software bad technical support even bad take days respond	Negative	App Store	1	1	0
App Store	662f102a-00bb-435c-bd3d-636df11f34aa	Ta11er	3/11/23 16:05	تطبيق فاشل				en	us	saib	You can't make a change or anything		ar	cant make change anything	Negative	App Store	0	1	0
App Store	be9a0a47-312c-4559-b84d-ec3f0255adf0	Saeed ma	3/6/23 10:58	اخر تحديث عبيط جدا				en	us	saib	Imagine that in order to perform any transaction, you have to wait for a 48-hour account protection period. It's a completely illogical and ridiculous solution, and you are the only stupid bank that has implemented it. If you don't get rid of this nonsense, no one will ever be able to use your services.		ar	imagine order perform transaction wait hour account protection period completely illogical ridiculous solution stupid bank implement dont get rid nonsense one ever able use service	Negative	App Store	1	1	0
App Store	b2a1441a-211c-40e1-ba2b-3af77119e5dc	abby999	2/4/23 1:05	لا تتوهق مع هالبنك يقفلون حساب تصفح بدون تنبيه للعميل قبلها بفتره وش ما تقدر تسدد او تحول				en	us	saib	No one should get confused with this fraudulent bank. They close accounts and freeze them. They confiscate funds. You can't pay bills, transfer money, or use a credit card, etc. without any reasons or prior notices. Respectable banks inform their customers a month in advance, offer them solutions, and respect them.		ar	one get confuse fraudulent bank close account freeze confiscate fund cant pay bill transfer money use credit card etc without reason prior notice respectable bank inform customers month advance offer solutions respect	Negative	App Store	0	1	1
App Store	e3c03cec-0bf4-4709-8919-788560559264	ابو عبدالله التميمي ٠٠	1/25/23 9:27	خيارات التطبيق جيدة لكن يوجد مشكلة				en	us	saib	The application options are good, but there is a problem with the application not accepting client login, forcing the client to delete the application and download it again to make it work!		ar	application options good problem application accept client login force client delete application download make work	Negative	App Store	0	1	0
App Store	d22846b7-231c-4cb4-9597-2662c0d62f3f	GR8OS	12/1/22 13:07	اصدار سيء				en	us	saib	Is there anything worse than this version? The services are good, but the application is very bad.		ar	anything bad version service good application bad	Negative	App Store	1	0	0
App Store	6bb644c5-d331-404d-a7d2-b30ac142f16a	F.Matar	11/25/22 7:45	أسوأ تطبيق بنكي				en	us	saib	Poor interface design Slow navigation between services Long login process Delayed and slow receipt of login code Application frequently logs you out Strange absence of significant and noticeable updates		ar	poor interface design slow navigation service long login process delay slow receipt login code application frequently log strange absence significant noticeable update	Negative	App Store	1	0	1
App Store	3049244d-ff63-492d-a3d6-00156d49f550	الريم .	11/19/22 10:55	سيء				en	us	saib	The application is not working.		ar	application work	Negative	App Store	0	1	0
App Store	512bf9af-a8bf-4b28-bea7-3b7ad6a3e806	FaisalKh	10/17/22 8:34	عملائكم يستحقون الافضل!				en	us	saib	What is the application of a large bank like Saudi Investment Bank? Its rating is less than 2, and we are still receiving updates, but there are no improvements. The application is old and slow.		ar	application large bank like saudi investment bank rat less still receive update improvements application old slow	Negative	App Store	1	0	1
App Store	d24333ae-abd6-4dba-a530-00e21322fbdc	Oobad	9/11/22 13:10	تطبيق ماله اي فايدة				en	us	saib	The worst application I have tried. The program is slow, it always freezes, and the login process gets stuck. Every other day, they send an email saying they are performing maintenance on their services, but there is no improvement in the application. Learn from other banks.		ar	bad application try program slow always freeze login process get stick every day send email say perform maintenance service improvement application learn bank	Negative	App Store	1	0	1
App Store	f3a08f68-58b3-40a5-af01-d5f1c61b3d46	amr refai	8/11/22 19:29	أسوأ السيئين				en	us	saib	The app is very slow in syncing with the bank account. The operations are carried out, but they are not reflected in the app. The app has also been experiencing periods where it does not work, even after the latest update, and the interface is not user-friendly.		ar	app slow sync bank account operations carry reflect app app also experience periods work even late update interface userfriendly	Negative	App Store	0	0	1
App Store	579eebd7-b810-4c12-8010-e49f50d99d3d	SamiiSaleh	8/11/22 0:34	تطبيق ضعيف				en	us	saib	The application was one of the strongest and best banking applications from around 2015 to 2019, so I switched all my transactions to the bank. After that, there was a major setback, extreme slowness, freezing, and exiting from the application! Other banks have become much stronger and smoother. It seems that the wheel of continuous development has stopped at the investment bank.		ar	application one strong best bank applications around switch transactions bank major setback extreme slowness freeze exit application bank become much strong smooth seem wheel continuous development stop investment bank	Positive	App Store	1	0	1
App Store	2f65006a-2bb5-47b7-b390-2b2d46b4c14a	10.2 IOS	7/21/22 21:10	حدثو التطبيق				en	us	saib	The application has slow updates and many problems.		ar	application slow update many problems	Negative	App Store	0	0	1
App Store	82273679-1c5c-43d8-ad11-585d3e78fd16	Mo220Hd	6/27/22 0:29	تصميم سيء لابعد الحدود				en	us	saib	If anyone understands a bit of design, they would create something much better than this. It's really bad, the software is laggy and slow. Honestly, I see that other banks have much better programs.		ar	anyone understand bite design would create something much good really bad software laggy slow honestly see bank much good program	Negative	App Store	1	0	1
App Store	2468ae02-d5c9-4253-9013-62c75efe4586	h-389	5/25/22 4:14	تحديث التطبيق				en	us	saib	It still hangs and needs a lot of development.		ar	still hang need lot development	Negative	App Store	0	0	1
App Store	fc6b886e-b1b7-42f6-b632-f5cd0aed1aa2	ahmadfx	5/24/22 14:11	الاولويات غير منطقية				en	us	saib	I need to know why a bank of this size underestimates the importance of knowing the extent of its customers' usage of the banking application for financial transactions. This application is considered the main reason for the departure or retention of a certain segment of customers, like myself. The application is considered a mobile bank, which is more important than all your branches and ATMs. T…		ar	need know bank size underestimate importance know extent customers usage bank application financial transactions application consider main reason departure retention certain segment customers like application consider mobile bank important branch atms first main branch electronic branch application need use least twice daily know information still think application important hope reconsider reass…	Negative	App Store	1	0	0
App Store	bc6fa67e-6bd8-483c-9a35-66fff613c211	تطور جميل بالخدمات	5/22/22 22:23	بطيء جداً				en	us	saib	The worst banking program in Saudi Arabia, extremely slow, especially when navigating between pages, from Visa to account statement to current account, etc. Please improve the speed of your customer service better.		ar	bad bank program saudi arabia extremely slow especially navigate page visa account statement current account etc please improve speed customer service good	Negative	App Store	1	0	1
App Store	5a9ca411-a400-40e0-bbcb-2c0186f835d9	awe18888	5/3/22 7:52	التطبيق سيء لايعمل وعند ادخال كلمة المرور تظهر رسالة أنها ليست صحيحة رغم أنها كلمة المرور الصحيحة				en	us	saib	And also, the program is slow compared to other banking applications and the update message appears when entering the application, and if you want to update, it redirects to another page that doesn't work.		ar	also program slow compare bank applications update message appear enter application want update redirect another page doesnt work	Negative	App Store	0	1	1
App Store	f45bbd1a-bba1-4056-a811-3959179234bd	Tarek.Yassen	4/23/22 6:12	توجد مشكله بتسجيل الدخول				en	us	saib	There is a problem with the application when logging in, which is the lack of a place to enter the security code. The application needs to be closed and reopened again until a place to enter the security code appears.		ar	problem application log lack place enter security code application need close reopen place enter security code appear	Negative	App Store	0	1	0
App Store	c17304cd-d0dc-4aa4-93b2-93b42dbb836d	abdul. khalid	2/22/22 18:29	يحتاج إلى تطوير سريع!!				en	us	saib	The application is in need of a lot of improvements! It is very slow in terms of response, unreliable, and prone to many malfunctions! We hope to see a functioning app that is worthy of the Saudi Investment Bank's reputation, compared to other banks in terms of ease and simplicity!		ar	application need lot improvements slow term response unreliable prone many malfunction hope see function app worthy saudi investment bank reputation compare bank term ease simplicity	Negative	App Store	1	1	1
App Store	94ba5444-f096-4168-aa13-87f9e94260a3	A 999	1/26/22 20:37	تحديث ردئ				en	us	saib	The update is poor and always shows an error message, asking to try again later. Fix the application before focusing on advertisements.		ar	update poor always show error message ask try late fix application focus advertisements	Negative	App Store	1	1	0
App Store	da9363f5-a93e-4b35-9545-21f8a795557b	Beso da Great	3/23/22 10:34	أسوأ تطبيق بنك سعودي بلا منازع				en	us	saib	The app is very bad and it keeps freezing, the buttons don't work. It's a shame because they have the best travel visa. Nevertheless, I will buy my comfort and health and use another bank because it raises my blood pressure so much. ð¤®ð¤®ð¤®ð¤®ð¤®ð¤®ð¤®ð¤®ð¤®		ar	app bad keep freeze button dont work shame best travel visa nevertheless buy comfort health use another bank raise blood pressure much	Negative	App Store	1	1	1
