# Supplementary material for: Retrieval-augmented generation analysis of user reviews in Saudi mobile banking apps: a comparative user experience study of iOS and Android
Source: PeerJ journal article supplement (doi:10.7717/peerj-cs.3565), 2026-02-06
Supplement: iOS.zip [file snb-mobile_final.xlsx]

## Sheet: Sheet 1 - snb-mobile_final
snb-mobile_final
source	review_id	user_name	review_date	review_title	developer_response	developer_response_date	thumbs_up	language_code	country_code	app_name	review_description	en	cleaned_reviews	Sentiment	ï»¿source	Satisfaction	Effectiveness	Efficiency
App Store	7eb0e59f-ed13-433b-8878-8a0356915201	نون٣١٣	12/13/22 4:59	غير جيد				en	ae	snb-mobile	The application frequently hangs, the old one was better than it, please resolve the problem.	ar	application frequently hang old one good please resolve problem	Negative	App Store	1	0	1
App Store	d22cc13e-5746-423e-ab28-fff78699f516	ayazxsniper	6/19/23 23:04	Terrible App				en	ae	snb-mobile	Kudos to developer for pathetic UI	en	kudos developer pathetic ui	Negative	App Store	1	0	0
App Store	125797a9-0509-42ca-97db-645ab811b376	Lanno's Dad	1/3/23 8:52	أسوأ تطبيق اعتمد عليه				en	ae	snb-mobile	International transfers have been under review for 6 months. The introduction of a new system means you cannot transfer for 48 hours. You are losing many customers. The merger should have improved things. You have taken the worst from Samba and the worst from Al-Ahli and merged them. Frankly, I am fed up with all the other people.	ar	international transfer review months introduction new system mean transfer hours lose many customers merger improve things take bad samba bad alahli merge frankly feed people	Negative	App Store	1	1	0
App Store	78833af8-cfba-4510-9e6a-521eabb856e5	lrpm2021	4/6/23 11:03	What the heck?				en	ar	snb-mobile	One release per month and i canât access every time?	en	one release per month cant access every time	Negative	App Store	0	1	0
App Store	0c8bdd5d-d741-4d35-815e-9a755be2a040	Lemo5x	3/2/23 19:59	السوء في ابهى صوره				en	au	snb-mobile	Very very very bad application, in short, it has a lot of comments and is very complicated.	ar	bad application short lot comment complicate	Negative	App Store	1	0	1
App Store	3ab24957-7e1e-4e74-841b-07bf569127f9	The NIO	2/2/23 23:46	سيئ جدا جدا				en	au	snb-mobile	One of the worst banking applications is always experiencing problems and freezes.	ar	one bad bank applications always experience problems freeze	Negative	App Store	1	0	1
App Store	23999881-4c04-4235-b460-a6f8cd8d7db7	Human loves justice	12/12/22 18:18	خدمات سيئة حتى للوسام				en	au	snb-mobile	Everything is hanging. Very bad.	ar	everything hang bad	Negative	App Store	1	0	1
App Store	a0fe0eb1-87b2-409d-b2f0-aedf4dd401e2	ايلافو احلى شركة وربي 🤍	4/28/23 21:52	يعلققققققق				en	au	snb-mobile	Very bad hang	ar	bad hang	Negative	App Store	1	0	1
App Store	0ff05d4b-7feb-47d7-9aa7-48a66649ea19	Qwertyuiotr	9/6/23 0:54	Strange request! No privacy				en	ca	snb-mobile	Why is it mandatory to access my location?	en	mandatory access location	Negative	App Store	1	1	0
App Store	4cf8be50-162d-4f3f-9a97-9cd6e3f6c130	Drfudo	9/3/23 17:26	No respect for privacy				en	ca	snb-mobile	Why are location services mandatory? This is just a banking app !	en	location service mandatory bank app	Negative	App Store	1	0	0
App Store	f33fabde-6756-46e8-ba0d-ac1b6196fd86	Bshayer,,	5/15/23 10:59	Q				en	ca	snb-mobile	The application has been not opening for a week, why!!!	ar	application open week	Negative	App Store	0	1	0
App Store	e6b4f331-bc35-4b4a-bf97-06373cd548fd	Redditisbad	3/16/23 19:07	Trash app				en	ca	snb-mobile	This app is trash and keep crashing itâs useless	en	app trash keep crash useless	Negative	App Store	1	1	0
App Store	f6edb975-c0be-46e1-bb5e-6371cd4b422d	Tore Basp	1/17/23 19:04	Very confusing & unfriendly				en	ca	snb-mobile	The app ask for update but does not give The option! Every time itâs the same message, ânew updatesâ	en	app ask update give option every time message new update	Negative	App Store	0	1	0
App Store	ee332d8e-765f-460f-b6d9-8d0829e99adb	Client- AA	1/10/23 8:44	Unfriendly user experience				en	ca	snb-mobile	The layout and colors are unpleasant Accessibility to information is complex and for statement until now i dont know how if even existed. (6 years client) huge down grade from the previous ncb app	en	layout color unpleasant accessibility information complex statement dont know even exist years client huge grade previous ncb app	Negative	App Store	1	0	0
App Store	fda64b94-555d-4470-a2af-4d73f08db955	Haitham Fallatah	11/28/22 2:46	Bad customer experience				en	ca	snb-mobile	Iâve been a customer with this bank since 2008, and I can safely say that this bank is one of the worst banks Iâve dealt with. Banks are know to be very slow to adopt new changes in the tech world, but the Ahli bank has been particularly slow. Their app has been buggy as hell and not user friendly in addition to other issues with customer service. Iâve finally had it with them and will be s…	en	ive customer bank since safely say bank one bad bank ive deal bank know slow adopt new change tech world ahli bank particularly slow app buggy hell user friendly addition issue customer service ive finally switch bank	Negative	App Store	1	0	1
App Store	df3e7355-5cb1-4d7a-bd91-43756404cb8a	MOhammed KSA🇸🇦	10/18/22 17:25	Please update the whole bank				en	ca	snb-mobile	I been with AL AHLI bank for almost 20 years This bank should update the whole bank because all banks in Saudi Arabia are getting update and getting things better only AL HALI bank getting old every single month What kind of update is this for the app itâs looks super ugly and makes me confused please try to spend some money to update your bank because you guys are so cheap	en	al ahli bank almost years bank update whole bank bank saudi arabia get update get things good al hali bank get old every single month kind update app look super ugly make confuse please try spend money update bank guy cheap	Negative	App Store	1	0	0
App Store	7ab2c8d1-1363-434c-bc25-b9b68c3d7465	EsLaM89978669096	2/2/23 12:28	الجديد سيي				en	eg	snb-mobile	The new update is very, very, very, very, very, very, very, very, very, very, very...	ar	new update	Negative	App Store	0	1	0
App Store	e8c6477d-ebb4-444c-81e6-6fb6a243c79f	Amer56	3/16/23 15:18	Issue for update				en	eg	snb-mobile	I can not upload the update	en	upload update	Negative	App Store	0	1	0
App Store	e0b09830-06a6-482e-abf3-ac2fd16a64fc	Ibn falasteen	9/14/23 7:42	التطبيق متعطل ارجو التحديث واصلاح المشكلة				en	eg	snb-mobile	The application is still crashing and exits immediately after opening it. Please update and fix the issue. I really need the application.	ar	application still crash exit immediately open please update fix issue really need application	Negative	App Store	0	1	0
App Store	41d3b528-ab6d-4fce-acd8-00516c53c776	Salema Sheikh	8/25/23 17:35	تطبيق في منتهي الاستفزاز الصراحة				en	eg	snb-mobile	Why is it that when I am outside the kingdom, the application does not open for many days and our interests are compromised? There is no activation code sent, which is very frustrating. It has been over 3 days and I want to access the application or my personal account from the computer, but I don't know how. ð¤·ð»	ar	outside kingdom application open many days interest compromise activation code send frustrate days want access application personal account computer dont know	Negative	App Store	1	1	0
App Store	1ab91130-368d-432b-8b90-29e8470edfdd	ahmedibrahim0100	5/30/23 4:18	لا يمكنني الدخول لحسابي بعد التحديث الأخير				en	eg	snb-mobile	The application no longer opens after the latest update. May God fix your situation.	ar	application long open late update may god fix situation	Negative	App Store	0	1	0
App Store	0fa5eac9-0b38-4074-9b42-7ebe12c58c47	مشكلة بفتح تطبيق الاهلي	5/12/23 22:46	الرياض - الناصرية				en	eg	snb-mobile	There is a problem with opening the application on my mobile. Please provide support and identify the problem. My number is 0501483543.	ar	problem open application mobile please provide support identify problem number	Negative	App Store	0	1	0
App Store	a9023b1b-3c08-4789-a3bd-896018002904	Nora.n2a	3/6/23 22:38	مشكلة في ارسال الاكواد!!				en	eg	snb-mobile	Waiting hours and it doesn't arrive, a different bank code arrives at the same time.	ar	wait hours doesnt arrive different bank code arrive time	Negative	App Store	0	1	0
App Store	954cc588-7281-4b57-8684-4bcc6548da92	m fakhr	12/12/22 14:51	حوالات دوليه				en	eg	snb-mobile	A bank like Al Ahli Bank charging higher fees for international transfers compared to Al Rajhi Bank. Al Rajhi Bank charges 10 riyals for transferring money to Egypt, whether it's to a bank account or a cash transfer. On the other hand, Al Ahli Bank charges 52 riyals for transferring to a bank account. I honestly don't understand the reason for this.	ar	bank like al ahli bank charge high fee international transfer compare al rajhi bank al rajhi bank charge riyals transfer money egypt whether bank account cash transfer hand al ahli bank charge riyals transfer bank account honestly dont understand reason	Negative	App Store	1	0	0
App Store	cd882ecd-7cc9-4b08-b259-4295e36ccbb8	abo hazem 5	11/10/22 1:23	حسابي قفل و مراضي يفتح				en	eg	snb-mobile	It is not working and the password is short, unlike what I did. Please solve the problem, I can't open the account.	ar	work password short unlike please solve problem cant open account	Negative	App Store	0	1	0
App Store	46ad5548-ae26-4cd4-80a1-6909f893742f	mahmoudReda77	10/17/22 11:42	لايعمل				en	eg	snb-mobile	I am not working and I do not know how to open my account.	ar	work know open account	Negative	App Store	0	1	0
App Store	9f105648-6cc3-4fc2-bcc3-222ac529797e	Ali tawfik	10/16/22 18:44	التحديث				en	eg	snb-mobile	The latest update, version 1.0.30, is garbage in every sense of the word. May God curse the person who developed it, they're ignorant and don't understand anything.	ar	late update version garbage every sense word may god curse person develop theyre ignorant dont understand anything	Negative	App Store	1	0	0
App Store	ece7717b-5fe2-453f-961c-904f3c36d759	ibrahim011	7/5/22 21:50	مشكلة في كتابة .				en	eg	snb-mobile	The latest update does not write the "." (dot), and I don't know how to open my account.	ar	late update write dot dont know open account	Negative	App Store	0	1	0
App Store	3ed86b05-f26c-445f-9dff-4b14938fce22	Ibnbakeel	4/16/23 8:30	مايشتغل بعد اخر تحديث				en	es	snb-mobile	Enough, have mercy on us. Updates every month, enough with the updates!! It was working perfectly fine, but you made an update that needs another update because of the errors it contains. You have exhausted us. Please, enough with the updates, for God's sake.	ar	enough mercy us update every month enough update work perfectly fine make update need another update errors contain exhaust us please enough update gods sake	Negative	App Store	1	1	0
App Store	f0ae7bc9-2ddd-4633-9848-7e4b9e9887be	twixban	8/17/22 8:49	Fahad				en	fi	snb-mobile	Best Mobile Experience	en	best mobile experience	Positive	App Store	0	0	0
App Store	5a4c8601-64c1-4e48-b260-c74b57da890c	Mal2411	10/25/22 10:24	Update				en	gb	snb-mobile	The callback has been updated. It now sends a OTP after pressing 1 to register. I have now registered my iPhone. However, the display on my iPad is not full screen. I cannot find My Traffic.	en	callback update send otp press register register iphone however display ipad full screen find traffic	Neutral	App Store	0	1	0
App Store	b587151c-c70c-41a2-95b7-45b49460390a	Majed29	4/3/23 11:06	لانستطيع طلب تمويل شخصي في التحديث الاخير				en	gb	snb-mobile	We cannot request personal financing in the latest update.	ar	request personal finance late update	Neutral	App Store	0	1	0
App Store	bd7b8259-a99a-4b3f-8589-3d156f6c5c77	juzsaud	11/9/22 10:05	Love the new app				en	gb	snb-mobile	The new app so amazing, user friendly and easy access to all the features !	en	new app amaze user friendly easy access feature	Positive	App Store	0	0	0
App Store	20ed7bcc-e131-44e6-93d2-3ed89adbb87c	Rrrrreeeeemmmmmm	9/4/23 19:33	So many updates				en	gb	snb-mobile	Every single day they have a new update, like every time I need to use the app I have to update it itâs not even optional.	en	every single day new update like every time need use app update even optional	Negative	App Store	1	1	0
App Store	84c7fd1b-55fd-4f5d-b59a-a9bbaac9e56d	BabbittElrodq	10/31/22 15:28	Wonderful service thank you 🙏🏻				en	gb	snb-mobile	SNB means efficiency	en	snb mean efficiency	Neutral	App Store	1	0	0
App Store	5cff84e1-b50a-4d1a-a40d-8bed516c3972	tbbassam	4/8/23 15:01	Taew albassam				en	gb	snb-mobile	I am facing problem with the application my I phone using ISO 12.5.7 canât open the the Application kindly find me solution.	en	face problem application phone use iso cant open application kindly find solution	Negative	App Store	0	1	0
App Store	d2e3ec07-7806-4f17-8e44-c80a274aa69b	noman alselmi	10/13/22 21:05	Bad update				en	gb	snb-mobile	I am not able to go through it , very bad update	en	able go bad update	Negative	App Store	1	1	0
App Store	ca0d6746-9368-4f68-9ec1-8916737a6a83	omar12345-0	10/7/22 16:09	Omar				en	gb	snb-mobile	The worst update, I cannot get into my account. I do not know if this is an update or block!?!?!	en	bad update get account know update block	Negative	App Store	1	0	0
App Store	3f61f08e-8a85-4d2f-b56a-78f0859aec24	Rasha Alturki	10/13/22 7:13	I can’t login !!!				en	gb	snb-mobile	This is stupid and time wasting	en	stupid time waste	Negative	App Store	1	0	1
App Store	4005211f-fce7-4504-aa16-86cb408c8c11	Bobby One UK	10/16/22 4:27	Great				en	gb	snb-mobile	Good app	en	good app	Positive	App Store	0	0	0
App Store	461c0f4a-c800-4e07-aea5-15e51b32b7ca	my eqama 2520991486	4/6/23 22:59	app problem				en	gb	snb-mobile	i have problem	en	problem	Neutral	App Store	0	1	0
App Store	fd0674b6-dc64-4d71-81f9-348335eb807c	Soma2050	1/6/23 22:14	اسوأ تطبيق بنك				en	gb	snb-mobile	Bad application and always out of coverage.	ar	bad application always coverage	Negative	App Store	1	0	0
App Store	7c8359d1-3f94-43b6-806d-1b491ae19c1f	Doogidee	10/22/22 19:47	Total garbage				en	gb	snb-mobile	On introduction I was in UK and unable to access my account. I went into my branch and with a little help managed to access it on my iPad but each time I try to access using my iPhone it says thereâs an error. Iâve also tried to register for the Token app, canât get that to work either! Wants me to scan a QR code, WHERE? anyone want to tell me where the QR code is? At one point it asked me …	en	introduction uk unable access account go branch little help manage access ipad time try access use iphone say theres error ive also try register token app cant get work either want scan qr code anyone want tell qr code one point ask enter phone registration part doesnt allow bring keypad anyone actually try app let loose real customers old app actually work bank app thats probably important thing…	Negative	App Store	0	1	0
App Store	4471c8ea-a4e4-4914-804e-bae9ef5d9e15	musfikin	4/17/23 15:31	Plees work in M bangking pay				en	id	snb-mobile	I m whiting work for M bangking 10 day What hapend aplikasi not work	en	white work bangking day hapend aplikasi work	Negative	App Store	0	1	0
App Store	22e5178b-ade3-4e51-904f-ee347f82e1e2	ali rrrr	2/2/23 7:04	برنامجكم سيئ و مضروب كما مثل بنككم 🌚 ما يسجل دخول				en	ie	snb-mobile	We repeat and reiterate, your program is bad and flawed, just like your bank ð and it doesn't record logins.	ar	repeat reiterate program bad flaw like bank doesnt record logins	Negative	App Store	1	1	0
App Store	46ac3a84-33bf-4d2a-8f98-be251b0d59d8	abdalmhsen	10/21/22 12:54	لا يعمل				en	ie	snb-mobile	There is a problem when logging in.	ar	problem log	Negative	App Store	0	1	0
App Store	bb6a8a86-7d56-4914-b700-88e785a82516	Hamooddiii	6/15/23 15:52	Always maintenance				en	in	snb-mobile	Application is having problems, either the device need re-register or âsomething went wrongâ or âunder maintenanceâ. These are most common messages you receive if you approach the bank for anything urgent	en	application problems either device need reregister something go wrong maintenance common message receive approach bank anything urgent	Negative	App Store	0	1	0
App Store	45ba12a8-66c8-4795-9bee-762b3171c1e6	ArKhan93	11/13/22 18:27	Worst service or no service				en	in	snb-mobile	This is the worst bank service i ever encountered. They will not reply you or resolve your problem. They will always tell you to come later. I have a account in alinma and rajhi they are a hundred times better.	en	bad bank service ever encounter reply resolve problem always tell come late account alinma rajhi hundred time good	Negative	App Store	1	0	0
App Store	d0ecfc25-6614-449f-9158-1507b27752f1	rexcharles	4/6/23 9:22	Bug				en	in	snb-mobile	Lots of bugs in new update.. app didnât open still hanging and canât transfer money and also canât manage beneficiaries. Please clear the issues	en	lot bug new update app didnt open still hang cant transfer money also cant manage beneficiaries please clear issue	Negative	App Store	0	1	1
App Store	25c0b8d8-0e94-4c87-8c38-cd2a7a2b6be8	DcS6198	12/8/22 4:37	Worst Bank App Ever				en	in	snb-mobile	Wonât login, it asks for update, once updated the whole thing goes back to the beginning,	en	wont login ask update update whole thing go back begin	Negative	App Store	0	1	0
App Store	f624d3b0-4619-4b8b-afdc-dffb97d7f8bf	mdazhar	9/3/23 19:18	Amazing app				en	in	snb-mobile	One of the best banking app in the world	en	one best bank app world	Positive	App Store	0	0	0
App Store	02d41fed-6a29-461f-befc-890447908a01	Danishkamal	11/1/22 5:30	Worst Bank in Ksa				en	in	snb-mobile	Worst service in the Kingdom, they forcefully want there customers to transfer every 3months and if not done they block your account and atm	en	bad service kingdom forcefully want customers transfer every months do block account atm	Negative	App Store	1	0	0
App Store	c7bf0b91-4cc2-4b99-aacb-0725b67df865	snbnik	10/21/22 23:04	Waste update				en	in	snb-mobile	Cannot update just rolling round in click bar	en	update roll round click bar	Negative	App Store	0	1	0
App Store	c12994d2-060a-44ee-8cb9-55091254a890	Virat Kohli 85	12/26/22 10:02	Expat				en	in	snb-mobile	Worst service.. irresponsible customer service	en	bad service irresponsible customer service	Negative	App Store	1	0	0
App Store	c7607536-85e5-43c5-b38b-062e5ddec245	Manu1858	11/12/22 7:16	Worst App				en	in	snb-mobile	A national bank of a country Really â¦.. This worst app developer is for the national bank of KSAð§	en	national bank country really bad app developer national bank ksa	Negative	App Store	1	0	0
App Store	e097f44a-9bfd-4156-b86a-1cb108dc36b1	Sooraj0779	3/20/23 19:11	Transfer problem				en	in	snb-mobile	No transfer option	en	transfer option	Neutral	App Store	0	1	0
App Store	f7a29f4b-3a6a-459a-8d46-63b61eb56581	&@sen	10/12/22 21:13	Registration issue				en	in	snb-mobile	Call not come for registration.app development very very worst..need lot of improvement.	en	call come registrationapp development worstneed lot improvement	Negative	App Store	1	0	0
App Store	874e4db6-e8eb-40a6-946c-f98eb14445c7	NazomC	11/15/22 8:17	Frustrated				en	ng	snb-mobile	The voice prompt is in Arabic and this is difficult for me comprehend the instructions.	en	voice prompt arabic difficult comprehend instructions	Negative	App Store	1	0	1
App Store	b1ae2217-369b-4728-b7ba-dc9f22124716	Sargam3850	4/4/23 6:31	issues				en	np	snb-mobile	why not open this app on may iphone 6 plus	en	open app may iphone plus	Neutral	App Store	0	1	0
App Store	c6097e8c-fb7e-45a4-a5e9-f61595bf2797	Rajan Karki	11/13/22 14:05	Apple pay not support				en	np	snb-mobile	I visited nearest branch, still same issues i can not top up eWallets	en	visit near branch still issue top ewallets	Negative	App Store	0	1	0
App Store	6a4eb3b4-b41f-4c80-a0a9-872fca8c43f7	ganesh bohara	4/7/23 15:52	Ganesh				en	np	snb-mobile	Canât open this apps in iPhone 6 What should I do sir	en	cant open apps iphone sir	Negative	App Store	0	1	0
App Store	aa5a13a3-6ef4-4058-a576-a7af9cfe1a76	حسين يوسف فاروقي	6/2/23 9:01	عدم ظهور البطاقات في الحساب				en	om	snb-mobile	There is a problem where I cannot see the cards in my account, and I cannot add them to PayPal. What is the solution? Also, if I lose my card, I won't be able to cancel it through the application because the cards are not visible.	ar	problem see card account add paypal solution also lose card wont able cancel application card visible	Negative	App Store	0	1	0
App Store	f8882407-61b5-4329-8ff1-09747339d5fd	حصريهسخحسحظزيحصجشويرر	11/22/22 7:53	دعم فني سيئ جدا جدا جدا				en	om	snb-mobile	Oh world, have mercy on us. I couldn't contact technical support or even submit a complaint through the same application. I hope you can help me with the solution. What is the problem?	ar	oh world mercy us couldnt contact technical support even submit complaint application hope help solution problem	Negative	App Store	0	1	0
App Store	428bf30f-b04a-4f5b-ae0d-e2a25c220ff6	Hdhshdjane	12/13/22 0:05	Apple Wallet				en	ph	snb-mobile	Please include the cards like Debit and Credit and even the virtual card to add on Apple pay wallet.	en	please include card like debit credit even virtual card add apple pay wallet	Neutral	App Store	0	1	0
App Store	8cf96043-7d70-4675-a688-34aed3fd09f2	YukiNagato018	3/8/23 21:30	Complaints and Request not working				en	ph	snb-mobile	Their atm failed to deposit my money. It was amounting 2600 SAR but it didn't went through. I received a text message that deposit ATM Correction. I tried calling their hotline and said that I should submit a complaint using the app. IT IS NOT WORKING. I tried it multiple times but IT DOESN'T WORK. I am clicking proceed but nothing happens. Their app is just useless sometimes. They are only good …	en	atm fail deposit money amount sar didnt go receive text message deposit atm correction try call hotline say submit complaint use app work try multiple time doesnt work click proceed nothing happen app useless sometimes good display financial information thats	Negative	App Store	0	1	0
App Store	ae120f22-dfee-467d-a755-3a47154eec25	1017nico	11/2/22 15:12	Worst banking app ever				en	ph	snb-mobile	Everytime you will open the app it keeps on going back to my App Store for update but there no update at all. Also the history or the record of the loan is not showing in the app. Worstttttt	en	everytime open app keep go back app store update update also history record loan show app worstttttt	Negative	App Store	0	1	0
App Store	7bf84d19-9461-4356-abd3-30ab52b3d7da	RobdC1222	1/3/23 20:57	No add Debit Card to Apple Wallet option				en	ph	snb-mobile	I searched the whole app but I found no option to add my debit card to apple wallet. Unlike in your previous Al Ahli Online Banking App, there is an option. Could you please fix this issue?!	en	search whole app find option add debit card apple wallet unlike previous al ahli online bank app option could please fix issue	Negative	App Store	0	1	0
App Store	e8a2579d-7a9c-48ad-82f5-b1aa1b975c02	Danocs	12/2/22 17:36	Not good				en	ph	snb-mobile	Quickpay transaction details and history is gone!	en	quickpay transaction detail history go	Neutral	App Store	0	1	0
App Store	db717379-9228-4ac2-a7a8-6e8edffa67ed	ahdhsjj	1/8/23 16:24	We cannot use to Apple pay !!!				en	ph	snb-mobile	NEED MORE IMPROVEMENTS	en	need improvements	Neutral	App Store	1	0	0
App Store	4d87aa71-34fa-4570-aaca-b22b899b9eeb	KALDERO NI KLAY	11/19/22 0:17	WORST BANK AFTER THE UPDATE				en	ph	snb-mobile	NOW YOUR ONLINE APP IS THE WORST HERE IN KSA	en	online app bad ksa	Negative	App Store	1	0	0
App Store	0d51a469-3e2a-453f-9008-562ae720f030	shermuel	11/22/22 6:35	Not goooodddd				en	ph	snb-mobile	Worst!!!!	en	bad	Negative	App Store	1	0	0
App Store	b4453545-15b1-41b3-ad42-586230d34f25	AbdulMajidKhan...	10/23/22 14:42	Quick Pay Beneficiary				en	pk	snb-mobile	Unable to add beneficiary under quick pay for Pakisan. Even not able to make the payment through existing Quick Pay accounts for Pakistan.	en	unable add beneficiary quick pay pakisan even able make payment exist quick pay account pakistan	Negative	App Store	0	1	0
App Store	e307656d-ff28-452a-bddc-45b166f10f9e	PRINICESS PARI	9/30/22 9:19	QUICK PAY BENEFICIARY.				en	pk	snb-mobile	Unable to add Pakistani account in quickpay beneficiary. It says that adding or modifying beneficiaries for Pakistan is currently unavailable.	en	unable add pakistani account quickpay beneficiary say add modify beneficiaries pakistan currently unavailable	Negative	App Store	0	1	0
App Store	d6104fab-2ad7-4e94-92c4-3f28c9ae65e7	ممم٦٢٧٢٧	4/12/23 17:25	اسوء تطبيق				en	pl	snb-mobile	Even the star rating is available on the application, I swear.	ar	even star rat available application swear	Neutral	App Store	1	0	0
App Store	2dda5bf2-fedf-42b8-a262-4ad4d0523501	Alloof	12/26/22 9:44	The latest updates				en	sa	snb-mobile	Definitely enhanced version of the app and more easy & accessible features which Iâm sure a lot of people appreciate. However, I am asked to update the app every time I wanna use it even when itâs already updated and thatâs so annoying! I hope that gets fixed too.	en	definitely enhance version app easy accessible feature im sure lot people appreciate however ask update app every time wan na use even already update thats annoy hope get fix	Positive	App Store	1	0	0
App Store	53f37317-9657-4fc1-a117-dc47c63e85ab	luuuuunnnnzzzz	4/23/23 23:38	Worst customer experience ever.				en	sa	snb-mobile	I wouldnât recommend this app to anyone since iâve faced way too many issues including but not limited to: not being able to login on a new phone because phone is not registered, and registration process is not working for that phone. another issue is when i receive money i canât use it immediately, itâs not with me or with the person that transferred the money so itâs just stuck there.…	en	wouldnt recommend app anyone since ive face way many issue include limit able login new phone phone register registration process work phone another issue receive money cant use immediately person transfer money stick another issue sometime app doesnt want work like right im try transfer doesnt want happen many time reason ive move good bank unfortunately family still use im require use sometimes…	Negative	App Store	1	1	0
App Store	f3ddfe57-cd5c-4eff-839e-007f193d976d	Turki12164$	11/30/22 15:55	Learn from ALRAJHI and SAAB Mobile app	{'id': 34247476, 'body': 'Dear SNB Customer,\n\r\nThank you for using SNB Mobile, the issue has been solved, please try again.', 'modified': '2023-01-12T11:28:02Z'}			en	sa	snb-mobile	The new app is not that bad but its no where near Alrajhi and SAAb applications. Complcated and has many errors. The credit card balance doesn't change right aways it shows u have money but in fact u dont same as the old app nothing changed and i have to scroll right to find my credits card. Should me in-front of me. I also have to update biometrics all the time and the 5 number passwords also th…	en	new app bad near alrajhi saab applications complcated many errors credit card balance doesnt change right aways show u money fact u dont old app nothing change scroll right find credit card infront also update biometrics time number passwords also password metrics weak like old app think app u try improve didnt work thats issue app u learn alrajhi app open account alrajhi app make itmy primary ac…	Negative	App Store	1	1	0
App Store	cb63d7ec-49e1-4d64-86a3-0e6cf570574a	Khloi Coursqovdme	10/21/22 13:25	I love SNB				en	sa	snb-mobile	I have had SNB for over 2 years and let me tell you. These new incentives they now have are amazing. The spot me, it links with a lot of cash apps type sites.!!!! Customer service is great!!! And the refer me cash is real. No little stipulations. It tells you what you need to do to receive your 50$. Plus what makes me love them even more!!!!! I went to an ATM that basically gave me a double fee c…	en	snb years let tell new incentives amaze spot link lot cash apps type sit customer service great refer cash real little stipulations tell need receive plus make love even go atm basically give double fee charge network prank snb two days late receive random email state reimburse something believe would definitely recommend snb everyone	Positive	App Store	1	1	0
App Store	78d2391c-0662-4073-97b2-6ef240878d02	Jebron Magillnbxvyghp	10/21/22 10:31	Manager came in clutch				en	sa	snb-mobile	App is fine but the company is not I got told Iâll get a one time courtesy interest fee waived they took the money back and said after review. If itâs a one time courtesy doesnât that mean there is no need to review. Then I ask to speak to a supervisor. Customer care says there is no supervisor available they will call you back in 2-3 hours. I say ok. I call back a whole 9 hours later expla…	en	app fine company get tell ill get one time courtesy interest fee waive take money back say review one time courtesy doesnt mean need review ask speak supervisor customer care say supervisor available call back hours say ok call back whole hours late explain ask havent get call say note finally manager come line promise thank	Negative	App Store	1	1	0
App Store	9dd47684-5f03-4873-8a03-1166c253e499	Melquisedec Bexleyzmnuwd	10/21/22 9:35	Maybe a couple changes...				en	sa	snb-mobile	I like having everything in front of you, signing on is awesome and easy! good sized fonts, the colors are great easy to see everything until you go to the payment portion, everything is different...the thing thatâs bothersome is all the verbiage under the payment portion, do you really have to see that all the time Maybe if you had the NEXT button in a color or more noticeable it would make it…	en	like everything front sign awesome easy good size fonts color great easy see everything go payment portion everything differentthe thing thats bothersome verbiage payment portion really see time maybe next button color noticeable would make lot smooth fast get get thank time	Positive	App Store	1	1	0
App Store	eaafb19e-a297-4400-9e4e-f2b9e903f003	Yachiyo Charnockmeubes	10/21/22 13:02	Love the app				en	sa	snb-mobile	I use this app all the time and love it! I love the feature where you can ask for a credit increase and get an answer within seconds. Very convenient. I havenât experienced any glitches with the app which is why I gave it 5 stars. One thing- I do wish my fico score was updated more regularly. Sometimes it doesnât update for a few months which can be a bummer. But other than that I like it	en	use app time love love feature ask credit increase get answer within second convenient havent experience glitches app give star one thing wish fico score update regularly sometimes doesnt update months bummer like	Positive	App Store	0	1	1
App Store	53162802-84dd-4995-948a-6abf6db4347b	Nakiah Braggevflb	10/21/22 9:01	Love this app				en	sa	snb-mobile	Itâs so easy to use. Iâve only called in when I lost my card and when someone tried to double charge a few times and they are great with any issue you may have. Other than that I really enjoy using the app. In a few seconds my payment is accepted and reflected immediately. Thatâs probably my favorite part. Good job folks! I appreciate your help in executing a very well working and excellent…	en	easy use ive call lose card someone try double charge time great issue may really enjoy use app second payment accept reflect immediately thats probably favorite part good job folks appreciate help execute well work excellent application	Positive	App Store	1	1	0
App Store	f6057609-d794-41a9-8afa-6db54ce8aa1f	Neeraj Simants	10/21/22 9:42	Great App				en	sa	snb-mobile	All of your balance info is on one screen. Easy to navigate payment screen. And, wonderfully, the balance that will be due after payment is shown as soon as you enter payment. Have to hit next after entering payment amount, which I didnât see initially. And then youâre given the opportunity to hit submit. Iâd love to see the interest charged on the balance screen as well.	en	balance info one screen easy navigate payment screen wonderfully balance due payment show soon enter payment hit next enter payment amount didnt see initially youre give opportunity hit submit id love see interest charge balance screen well	Positive	App Store	0	1	0
App Store	44b5bb7d-427b-4579-a4fc-27c5e01b1e8b	Markcus Okillxh	10/21/22 10:09	Great App				en	sa	snb-mobile	I use this app frequently and havenât found anything I canât do with it. Some banking apps I need to also access the account from a computer to see all I need but not the SNB app. Very user friendly, makes payments easy to set, I love seeing the flex plan options on each transaction, my reward balance and more. Overall an amazing app for credit cards	en	use app frequently havent find anything cant bank apps need also access account computer see need snb app user friendly make payments easy set love see flex plan options transaction reward balance overall amaze app credit card	Positive	App Store	0	1	0
App Store	1857ee1a-8333-44e4-abd8-18dab5583378	Mr.DD7	1/5/23 11:42	The worst service you could ever have				en	sa	snb-mobile	When a bank make an app , they make it to have everything done by the app , but with an SNB itâs different, just sign to the app is hole story, i just try to sign in my other device they asked a million of informations , it took 20m form my own time , at the end i couldnât sign, because the service is broke ?! now iâm they one who is broke. and every time i try to sign in my device i canâ…	en	bank make app make everything do app snb different sign app hole story try sign device ask million informations take form time end couldnt sign service break im one break every time try sign device cant app lag stop work learn form bank customer experience ever develop way secretory jusy imagine want sign oh goodness	Negative	App Store	1	1	0
App Store	d118d85b-1425-4205-9dae-062a437bec3a	nwowidhbdkqowhdw	11/8/22 7:09	Banning virtual payment apps حظر تطبيقات الدفع الرقمية				en	sa	snb-mobile	I hope the app developers take note of this opinion. There is nothing worse than your bank, the one you've been loyal to for years, banning apps that serve you as a customer and as a normal person. Why? Because of the bank's policy. You disrupt the world, I swear, and force the customer to leave you. Launch a service like stcpay or urpay, and then ban similar apps, instead of going and disrupting…	ar	hope app developers take note opinion nothing bad bank one youve loyal years ban apps serve customer normal person bank policy disrupt world swear force customer leave launch service like stcpay urpay ban similar apps instead go disrupt people live swear something disgust person im process transfer different good bank god will	Negative	App Store	1	0	0
App Store	b5d69fd1-e0e2-46af-8df6-d119907ce6b8	jobaedul	10/12/22 16:59	Account blocked without valid reason				en	sa	snb-mobile	Im using this account for more than 10 years, and now without any notice they blocked my account so Iâm unable to transfer money nor i can withdraw. And I received notification saying Iâve to update my personal information, so what they did when i open my account from the branch ? Didnât they have my information? The more disgusting is when im trying to update my information itâs showing …	en	im use account years without notice block account im unable transfer money withdraw receive notification say ive update personal information open account branch didnt information disgust im try update information show error every time rubbish block someone account without reason notice	Negative	App Store	0	1	0
App Store	5153f653-b03d-4a5f-a8e0-29c27f9adab3	VictimOfANB	7/27/23 20:51	Learn from AlRajhi Bank				en	sa	snb-mobile	A sloppy mobile app. Struggling to add the card to Apple Wallet. Called the bank dor over three weeks. They keep telling me to use the app to add the card. It never worked. Then they admitted they have issues. A week later they removed the option ro add the card from the mobile app. Smhâ¦â¦ The irony is the consider themselves as a leading bank while the truth of the matter is they are still us…	en	sloppy mobile app struggle add card apple wallet call bank dor three weeks keep tell use app add card never work admit issue week late remove option ro add card mobile app smh irony consider lead bank truth matter still use mainframe terrible service old school mentality please never trust reply review try leave bank alrajhi alinma	Negative	App Store	1	1	0
App Store	0c4f8286-75ad-42ef-bd7d-45d4eff7925c	Moad Overilhzcf	10/21/22 10:57	Long time customer				en	sa	snb-mobile	Had two SNBcards for decades. Love the mobile app. Appreciate the quick text to question any suspicious activity and through the years they have caught two separate fraud attempts. I feel very safe and secure with their cards and earn decent rewards.	en	two snbcards decades love mobile app appreciate quick text question suspicious activity years catch two separate fraud attempt feel safe secure card earn decent reward	Positive	App Store	1	1	0
App Store	ff57675a-04ae-4f2a-bb79-fd87674fb9da	Dietrich Whiteheadtiwcdu	10/21/22 11:17	Love SNB				en	sa	snb-mobile	I love SNB! EVERYTHING about it. No fees, no hassle, no issues, no problems. Early deposits, prevents overdrafts. Theyâre a bank that actually cares and protects their customers compared to all these other banks that want to take my from you. Theyâre are the ideal bank that does what a bank is supposed to do. Love it!	en	love snb everything fee hassle issue problems early deposit prevent overdrafts theyre bank actually care protect customers compare bank want take theyre ideal bank bank suppose love	Positive	App Store	1	1	0
App Store	78bd973b-a245-49f0-9e8c-ceaa444aa5ba	Mahsa Zelleyqshh	10/21/22 12:36	Downloaded the update 15 on apple phone				en	sa	snb-mobile	And it deleted my SNBbank app. Strange. I have been banking with SNBbank since 1998. Iâm trying to download it back and for two days it has been spinning and not downloading! Help with this please I need the app to have access to my accounts.	en	delete snbbank app strange bank snbbank since im try download back two days spin download help please need app access account	Negative	App Store	0	1	0
App Store	5ba46b0d-c033-42a0-9a1c-85873d52662b	kukukukukukukukukukukukuu	8/12/23 15:44	Worst app ever!				en	sa	snb-mobile	This is the worst app ever Alrajhi is FAR better and more professional! This is a poorly made app. Kids games here on the App store are made with better quality! Unbelievable how does this app belongs to one of the biggest banks? Disappointed but not surprised. I would never make an Alahli account i was unfortunately forced to get one by my university otherwise I wouldnât put myself through the…	en	bad app ever alrajhi far good professional poorly make app kid game app store make good quality unbelievable app belong one big bank disappoint surprise would never make alahli account unfortunately force get one university otherwise wouldnt put trouble break almost year fix stupid thing	Negative	App Store	1	0	0
App Store	b71a6fc6-389c-4b74-8654-263a5756e551	nqb128	8/26/23 19:16	SNB mobile App.				en	sa	snb-mobile	Today I was unable to access the snb mobile and creat a new passward. I have tried milion times I should be receiving a call to approve the new passward but unfortuntly I have waited minutes & minutes tried many times I even called bank support nubmer but they keep saying nothing wrong so this new version of snb mobile app is a total failure. I'm planning to change my bank soon cause I have suffe…	en	today unable access snb mobile creat new passward try milion time receive call approve new passward unfortuntly wait minutes minutes try many time even call bank support nubmer keep say nothing wrong new version snb mobile app total failure im plan change bank soon cause suffer much ahli bank recent years	Negative	App Store	0	1	0
App Store	d534fd80-0a9b-4a52-873d-988390f2e2a1	Someone from LA	7/22/23 0:32	Very bad				en	sa	snb-mobile	This app must be removed from Apple Store until they make a good banking app!! All accounts are late in balance and it takes sometimes up to 3 hours!!! The app itself is very buggy and makes error and definitely not easy to use. I have contacted the customer support to report issues within the app, but unfortunately they acted like itâs a holy app that wasnât made by humans and doesnât have…	en	app must remove apple store make good bank app account late balance take sometimes hours app buggy make error definitely easy use contact customer support report issue within app unfortunately act like holy app wasnt make humans doesnt errors issue	Negative	App Store	1	1	0
App Store	f1825041-d8e9-44e5-a8b9-81acb7ad72f6	bluegaysoul	10/7/22 21:08	.				en	sa	snb-mobile	I loved the new app it was well-organized and clear without any complications, but some of the pages were slow. Also, you need to work on the content ð I was on the Arabic version but still, there is English content shown + I found dummy textâ¦ I think you could do better ðð¼ Good luck	en	love new app wellorganized clear without complications page slow also need work content arabic version still english content show find dummy text think could good good luck	Positive	App Store	0	1	1
App Store	9b58c81c-713b-443e-8744-b2eae9289285	JepotPH	10/7/22 18:37	Great App				en	sa	snb-mobile	I just downloaded the new updates and the user interface is very nice. I love the color background and new icons on the go. This app is very reliable when it comes to loca and international money transfer!	en	download new update user interface nice love color background new icons go app reliable come loca international money transfer	Positive	App Store	0	1	0
App Store	25ea894f-40f8-45eb-9691-5eb3c7931f88	mgoharnisar	12/24/22 5:22	Beneficiary Management issue. With new update on 24 dec 2022 Apple				en	sa	snb-mobile	It show error as we click on beneficiary management button. Also we canât add beneficiary for international / quick pay. Please do favor for all users to open by our self. I have screenshots for 1st error I can share if needed.	en	show error click beneficiary management button also cant add beneficiary international quick pay please favor users open self screenshots st error share need	Negative	App Store	0	1	0
App Store	e5abf19e-fb7a-4ac5-84c6-2d18682fbc48	Iphone Ten user	11/1/22 20:35	Call back feature is difficult to use				en	sa	snb-mobile	For security reasons, a call back might request ATM number while on the go, it might not be available as quick as the call asks for immediate action which is disturbing. The app suddenly asks for updates and stops for this where you might be in a busy day and wastes your valuable time.	en	security reason call back might request atm number go might available quick call ask immediate action disturb app suddenly ask update stop might busy day waste valuable time	Negative	App Store	1	0	0
App Store	24595455-fddb-4d98-8689-75fc2b044925	Zyani Elkincaklunjl	10/21/22 12:17	Easy app				en	sa	snb-mobile	Great app the only thing to improve would b to have multiple cards on app. Rather than having to log cards in and out if u have multiple city cards	en	great app thing improve would b multiple card app rather log card u multiple city card	Positive	App Store	1	0	0
App Store	20b259fa-b0ea-4285-bfee-c4f9ac1b82c1	Ahmed Al Mashhadi	11/16/22 4:39	Worst Upgrade ever!				en	sa	snb-mobile	The old App was at least 10x better, more user-friendly and more intuitive .. Despite the enhanced looks of this version, but it is a total disappointment! I truly wish that i can rollback to the old app because I have been suffering with this App a lot since the upgrade was made compulsory. My review has nothing to do with resistance to change - It is a disastrous User Experience!	en	old app least x good userfriendly intuitive despite enhance look version total disappointment truly wish rollback old app suffer app lot since upgrade make compulsory review nothing resistance change disastrous user experience	Negative	App Store	1	0	0
App Store	a1e8b479-49e0-450a-b596-d53c4d4885b5	sffffrrrr	11/4/22 20:07	Disapointing				en	sa	snb-mobile	The new app is worse than the previous version. Someone had an obsession with designing the app and using colours etc, while forgetting that the main use of the app is to operate your account. And at operating your account the app fails compared to the old version.	en	new app bad previous version someone obsession design app use colour etc forget main use app operate account operate account app fail compare old version	Negative	App Store	1	1	0
App Store	17ac557d-a3f1-4ecc-a667-a35d1b20ef8f	Hashem1983	10/30/22 16:33	Unhappy with it				en	sa	snb-mobile	I donât understand the reason of having another app replacing the previous one. I usually like to pay my car loan on the app, which something I used to do on the previous application while I couldnât here, I had to do it via the desktop website. I feel that there are many features have been removed in the current new version	en	dont understand reason another app replace previous one usually like pay car loan app something use previous application couldnt via desktop website feel many feature remove current new version	Negative	App Store	0	1	0
App Store	7a4b2e01-2655-4ea5-a44c-7b790b40b5a0	Pkengineer	9/10/23 11:05	Disaster app				en	sa	snb-mobile	This app has become completely disaster. Over the past 2months I have tried to used it and 99% of the time it didnât work and displaying message â we are sorry for inconvenience and not being available at this timeâ what is the use of the mobile app if every time I have to login using the computer web browser.	en	app become completely disaster past months try use time didnt work display message sorry inconvenience available time use mobile app every time login use computer web browser	Negative	App Store	1	1	0
App Store	d7f45a04-c732-4745-907b-c8a6e361da4b	Hsn Amri	11/2/22 18:52	Need To Elevate				en	sa	snb-mobile	Friendly user and better experience inside the app but Seems that there is bugs in new app and several issues on login. ( they keep uploading for long time without login). Hopefully will be fixed soon	en	friendly user good experience inside app seem bug new app several issue login keep upload long time without login hopefully fix soon	Neutral	App Store	1	1	0
App Store	9863b4fd-40bc-40cf-91df-ae5d38ad1cda	Julia1980!	9/3/23 2:45	Sometimes fast transfer sometimes after two days				en	sa	snb-mobile	Sometimes fast transfer sometimes after two days take note that a local transfer i made ..	en	sometimes fast transfer sometimes two days take note local transfer make	Neutral	App Store	0	1	1
App Store	bc2892fb-94e8-4c6d-aa38-0720c4a10db3	verano valera	5/8/23 9:39	Not working my NCB mobile.				en	sa	snb-mobile	Hello have a good day. I have problem to my NCB mobile coz itâs not opening at all. Thatâs why every I send money i go to the bank. Can you help me please. Thank you	en	hello good day problem ncb mobile coz open thats every send money go bank help please thank	Negative	App Store	0	1	0
App Store	dc116bb2-c63a-4cad-88dd-207def2d328f	Akshay reji	12/13/22 17:27	Useless App				en	sa	snb-mobile	Trying to open the app on my new phone and it wont let me register even after following the whole steps. Once you call customer service they keep telling you to visit the branch. What is the purpose of mobile and internet banking if we have to visit the branch for all issues. Such a useless app with no regards to customers convenience.	en	try open app new phone wont let register even follow whole step call customer service keep tell visit branch purpose mobile internet bank visit branch issue useless app regard customers convenience	Negative	App Store	0	1	0
App Store	4a42a216-b252-4160-9874-255a9f7d8fd8	S.Dossary	12/1/22 21:25	Terrible				en	sa	snb-mobile	The worst app I have ever experienced. I have not changed my password & it denied me logging in. I changed & the same results again! Contacted there support by phone & they couldnât solve anything!! They told me to keep trying after an hour & guess what no access again. One of the major banks in the Middle East & they do not have a functioning appâ¦.unbelievable!	en	bad app ever experience change password deny log change result contact support phone couldnt solve anything tell keep try hour guess access one major bank middle east function appunbelievable	Negative	App Store	1	1	0
App Store	aaa17d42-15f9-4f48-a60c-c98440b33e18	cagsvsvs	10/14/22 10:11	Worst Experience				en	sa	snb-mobile	I used the old app for many years. The new app didnât allow me to login. I reset my password still not able to login. My wife has similar issue with the app. I suggest the bank to test the app properly before forcing its customers to use the app. I have an urgent transaction but not able to make it. Worst bank app and worst experience	en	use old app many years new app didnt allow login reset password still able login wife similar issue app suggest bank test app properly force customers use app urgent transaction able make bad bank app bad experience	Negative	App Store	1	1	0
App Store	0a255678-39c9-46ba-99f2-0e8739c8a2fb	Hun..	9/6/23 16:50	Worst Banking App				en	sa	snb-mobile	Extremely unstable, crashing, buggy, and not user friendly. With the latest update, turning on location has been mandated, which is nothing short of stupid and dumb. Deleted the App already, wonât be using it, instead will use Ahli online. Letâs see if sanity prevails and they fix these pathetic and frustrating issues.	en	extremely unstable crash buggy user friendly late update turn location mandate nothing short stupid dumb delete app already wont use instead use ahli online let see sanity prevail fix pathetic frustrate issue	Negative	App Store	1	1	1
App Store	97fa57a8-d858-4bf1-8ea8-bf55b8dcd86f	Anshansmona	12/12/22 21:22	Need improvement				en	sa	snb-mobile	The new App always ask for updates even I just finished the update and not open till I go to App Store and press update and then it works and from my view the previous looks and navigation was so great and better than the new one	en	new app always ask update even finish update open till go app store press update work view previous look navigation great good new one	Positive	App Store	0	1	0
App Store	ebc47458-a785-446e-af82-32d4632ebbde	Cairo Egypt	10/14/22 21:11	Unexpected fail				en	sa	snb-mobile	The app is slow, OTP codes and messages takes too much time to be sent, you will probably receive them after closing the app and giving up on it! This should be an upgrade, in fact it is a downgrade! Hope you fix these problems because you are just delaying our much timely needed transactions.	en	app slow otp cod message take much time send probably receive close app give upgrade fact downgrade hope fix problems delay much timely need transactions	Negative	App Store	1	1	1
App Store	72a6463a-eede-4432-b024-5186cdae3dd6	haku_01	12/20/22 9:53	Latest update is not working !				en	sa	snb-mobile	I have big issue here, the app after update 1.1.3 is completely not working what is wrong thereâs nothing wrong in my phone everything is working fine unless your app you should fix the issue as fast as possible before you lose more customers. Iphone 11 pro ios 16.2	en	big issue app update completely work wrong theres nothing wrong phone everything work fine unless app fix issue fast possible lose customers iphone pro ios	Negative	App Store	0	1	0
App Store	80948812-c112-4e1a-a7b2-558e386cc089	A.M. Alotaibi	3/15/23 12:16	The WORST				en	sa	snb-mobile	I donât usually write reviews, but someone needs to say something. You canât transfer money after midnight unless itâs another bank. You canât even transfer between your own account. They are taking your money without telling you that. The app is very bad, after midnight you can't transfer money to Al-Ahli bank or even between your own accounts. And if you do transfer, you have to transfe…	ar	dont usually write review someone need say something cant transfer money midnight unless another bank cant even transfer account take money without tell app bad midnight cant transfer money alahli bank even account transfer transfer another bank take commission mean forcefully take money without justification important transfer another bank	Negative	App Store	1	1	1
App Store	02272cbc-8839-42c7-a5c7-a9c70da72848	AHMEDS1993	10/15/22 11:50	Icons				en	sa	snb-mobile	Itâs better than previous app, but I wish if you could change the services icon to be more (simplified and flat) to match the modern design of the app, and give it a clear look. Thanks	en	good previous app wish could change service icon simplify flat match modern design app give clear look thank	Positive	App Store	1	0	0
App Store	d681bb26-7f76-4473-a681-556701950c58	Tka_tha	10/13/22 22:37	Buggy				en	sa	snb-mobile	Cannot use sadad to pay bills. Tried everything to no avail. Obviously the app was deployed without proper testing, sadly. If you can, please return the old app until you properly test the new one and fix the many issues. Sometimes fixing issues introduces new bugs! Then the problem becomes a nightmare. Good luck	en	use sadad pay bill try everything avail obviously app deploy without proper test sadly please return old app properly test new one fix many issue sometimes fix issue introduce new bug problem become nightmare good luck	Negative	App Store	1	1	0
App Store	61672bdb-947e-4b36-9d07-c25f40bee8c1	Shermar Exallswcvmx	10/21/22 12:46	Great!!!				en	sa	snb-mobile	What I love most is the ability to utilize the payment you made on your account right away, if you have too. Love you guys.	en	love ability utilize payment make account right away love guy	Positive	App Store	0	1	0
App Store	8d39d379-2f54-4637-abba-7bab461c31d8	Danyael McCombepepusj	10/21/22 9:29	Best card on the market				en	sa	snb-mobile	Great to have a card that gives you the lift to achieve your goals of life changing obstacles .	en	great card give lift achieve goals life change obstacles	Positive	App Store	0	0	0
App Store	04f900d0-6a5a-4198-ab5e-502481bcf027	Drhani99	4/5/23 16:40	Updates				en	sa	snb-mobile	Please reduce the amount of updates you do please, itâs getting tiring having to update every other day â¦. Please take this into consideration	en	please reduce amount update please get tire update every day please take consideration	Negative	App Store	0	0	1
App Store	8aee240b-6510-4f8b-9b5f-5919275e89f3	Wael Saleh	11/26/22 7:29	Deficient Application				en	sa	snb-mobile	Many services cannot be achieved through the app, even during typing names it would not give spaces between parts of the name- you get all letters adherent to each other without any space & you need to add them separately. Also, many services are denied & you should go to the bank instead	en	many service achieve app even type name would give space part name get letter adherent without space need add separately also many service deny go bank instead	Negative	App Store	1	1	0
App Store	1b31031e-b394-4abf-b2fa-f8828eb6fa07	amaga63	12/13/22 18:57	Extremely bad!				en	sa	snb-mobile	I donât understand why they terminated the previous application prior to making sure that the new one is fully functioning!! I faced a lot of issues using the new one and I had to call the customerâs support and they were confused with the new app. like everybody else! Please donât do it again.	en	dont understand terminate previous application prior make sure new one fully function face lot issue use new one call customers support confuse new app like everybody else please dont	Negative	App Store	0	1	0
App Store	150b8c00-d4e0-403f-8224-ae82802ce34d	Anni Sh	10/28/22 7:47	The former app was better				en	sa	snb-mobile	This app has many features missing. Such as paying the bills for someone elseâs card. Hope you make more better upgrades.	en	app many feature miss pay bill someone elses card hope make good upgrade	Negative	App Store	0	1	0
App Store	ce737d95-bdca-41e1-8738-6d4ca1818472	Ddyyaallaa	8/11/23 2:30	I hope you fix it				en	sa	snb-mobile	Itâs a good app but every time I log in my account I wait too long and after I wait it says that service unable	en	good app every time log account wait long wait say service unable	Negative	App Store	1	1	0
App Store	d13f82ab-b9bc-4d18-b55c-2fbb422cff5f	Sara Hammad	9/5/23 13:54	So bad - not recommend at all				en	sa	snb-mobile	I am tried your app your bank but unfortunately nothing is working good I tried for 3 month to rices issue through your app and every time show me different issue!! I am VIP but even though i didnât have any add value!! Disappointed I will change my bank.	en	try app bank unfortunately nothing work good try month rice issue app every time show different issue vip even though didnt add value disappoint change bank	Negative	App Store	1	1	0
App Store	7629bbcc-d8a0-4d80-b839-93a946857c99	Sa4W	11/29/22 23:29	خلل في التطبيق				en	sa	snb-mobile	Every time I open it, a message appears saying there's a new update and the app is already updated. I have to click on it and it opens the App Store, then I have to click "Open" in the App Store to make the app work properly. It's very annoying! Please fix it as soon as possible.	ar	every time open message appear say theres new update app already update click open app store click open app store make app work properly annoy please fix soon possible	Negative	App Store	1	1	0
App Store	244dc7eb-1ef0-4973-b30d-b7d1b5230eea	ابتبتسنسخ	10/27/22 1:29	Lagging				en	sa	snb-mobile	There is lag at every step, last one was better.	en	lag every step last one good	Negative	App Store	1	0	1
App Store	4bc66a8e-7d11-4bf9-aee4-c15429410219	zesehan	4/15/23 19:57	Not good				en	sa	snb-mobile	Change it update not working this update iPhone	en	change update work update iphone	Negative	App Store	0	1	0
App Store	a3d58063-9e97-4893-8ff1-1262ed2ce39b	alaa alblwi	11/19/22 19:27	التطبيق في حالة سيئه جداً				en	sa	snb-mobile	The app is very very bad. It's almost like we don't have an app. We have to go to the ATM. The problem with the application has been going on for two months, and there are no solutions in the bank, since the application upon entering writes that there is an error in the information constantly.	en	app bad almost like dont app go atm problem application go two months solutions bank since application upon enter write error information constantly	Negative	App Store	1	1	0
App Store	7218dc53-af23-42bc-9ed4-04b8dfd17afe	Khaled Makkah	11/11/22 13:30	Nad experience				en	sa	snb-mobile	There are errors most of the time and the app is not working properly. As a customer, i do not have to call customer service and wait like 30 mins to speak to someone to fix it. Sorry it is so bad experience specially when you need the service at once. Embarrassing.	en	errors time app work properly customer call customer service wait like mins speak someone fix sorry bad experience specially need service embarrass	Negative	App Store	1	1	0
App Store	5cfbe37d-be53-4a42-8e50-e44f25708bbe	Thawab Alrashedi	12/18/22 12:33	Apple wallet				en	sa	snb-mobile	I canât add my card from app !!! I donât fund any options plz can fix this small issue	en	cant add card app dont fund options plz fix small issue	Negative	App Store	0	1	0
App Store	e8dbec6d-25cf-46b9-be35-59d2ea7e3e65	Engo.Mohd	9/19/22 21:42	Bad				en	sa	snb-mobile	When are we going to get a decent app, a lot of errors in every option, a lot of options are not available although the same options were available in the previous app, I believe they are using some ready-made templates	en	go get decent app lot errors every option lot options available although options available previous app believe use readymade templates	Negative	App Store	0	1	0
App Store	c105a125-db98-4eaf-ba52-a39b242abb81	3amer7	12/14/22 5:38	Many updates				en	sa	snb-mobile	The issue is too many updates for this application around every week And can not use the application should after update This is bothering	en	issue many update application around every week use application update bother	Negative	App Store	0	1	0
App Store	d6a2dace-2b94-447e-9f1c-9363acb19bb8	Nyzier Bateman	10/21/22 13:31	Great app experience				en	sa	snb-mobile	Navigating this is more pleasant than the desktop website.	en	navigate pleasant desktop website	Positive	App Store	0	0	0
App Store	acb6ec7e-9836-4f6b-bed2-e131a3afd460	MHB.Bub	5/28/23 9:24	New update delated SADAD				en	sa	snb-mobile	Hello ,, just to report somewhere that the new update deleted the option for SADAD, thus I not able to pay my bills ! Please fix it .. thank you.	en	hello report somewhere new update delete option sadad thus able pay bill please fix thank	Negative	App Store	0	1	0
App Store	f92df407-d848-45d9-8992-effbe90139e0	aiskandr	10/23/22 6:59	Poor App				en	sa	snb-mobile	Slow, colors makes reading numbers is difficult. Many times sms is missed. Previous App is much better.	en	slow color make read number difficult many time sms miss previous app much good	Negative	App Store	1	0	1
App Store	0f2b61d5-f481-43dd-b1ea-05985a3d7fd9	ibrahem kong 44	3/15/23 11:26	Programer				en	sa	snb-mobile	The one who has programmed the app is insane , he made it slightly better with much smother than the one before thank you	en	one program app insane make slightly good much smother one thank	Positive	App Store	1	0	0
App Store	3c3f6969-cad0-405d-ae8f-316c39e1ba4f	frustrated snb user	12/29/22 21:33	worst upgrade from snb				en	sa	snb-mobile	previous app was better organized but this one only just frustrates users. no option to see your own mada card details or add to apply pay. applying for credit card generates wrong postal addresses. sadad services were better in previous versions. no way to pay salam mobile bills. no way to modify or activate or deactivate debit card on phone. very disappointing services by snb. learn from al raj…	en	previous app good organize one frustrate users option see mada card detail add apply pay apply credit card generate wrong postal address sadad service good previous versions way pay salam mobile bill way modify activate deactivate debit card phone disappoint service snb learn al rajhi bank service customers rather make silly app upgrade frustrate online bake users	Negative	App Store	1	1	0
App Store	0c56a856-0f87-4f72-af5b-043c45b201cf	PrinceANAS	5/6/23 16:54	Worst bank application ever!!!				en	sa	snb-mobile	Itâs just a shame that the company couldnât develop this application to be the best or at least at same level of other banks apps. This app glitches so much & hard to access whatsoever. I guess I have to find better bank and save my headache. ð¡ð¡ð¡ð¡ð¡	en	shame company couldnt develop application best least level bank apps app glitches much hard access whatsoever guess find good bank save headache	Negative	App Store	1	1	1
App Store	1175f19c-f618-423c-b6f1-b1cd42ea01ee	Hamad hamed	11/8/22 10:11	Big Jump I appreciate it🤍				en	sa	snb-mobile	I could tell the Dev. departments worked as they should do	en	could tell dev departments work	Positive	App Store	0	1	0
App Store	3345ab83-6e13-4bdd-b768-4840c03b6c8b	captainmajed	10/13/22 8:16	Slow & Jammed				en	sa	snb-mobile	I really donât know why the bank had to come with this slow not working version. I mean the old one was working fine. For a huge bank like SNB they should have come with a way better faster application. A real waste of what this bank used to be.	en	really dont know bank come slow work version mean old one work fine huge bank like snb come way good fast application real waste bank use	Negative	App Store	1	1	1
App Store	c63c3e4e-c496-45e8-979d-5aa341cfeea2	Fahad Abdullah2	5/23/23 13:01	Please stop messing up				en	sa	snb-mobile	The app needs a change in its developer. It is clear that there is a lot of confusion happening.	ar	app need change developer clear lot confusion happen	Negative	App Store	1	0	0
App Store	043817dd-b62d-4203-8bdb-b29ce94b6936	Nadaaaaaaaaaaaasha	4/21/23 10:35	Poor app				en	sa	snb-mobile	Iâm stuck in italy right now , i cant log in to my account .. its mentioned that my phone is not registered !!!!! And i just logged in from the same phone few days ago before i leave Saudi !!!! I keep adding my phone Again â¦ !!! And it keeps tilling me my phone not REGISTERED!!!!	en	im stick italy right cant log account mention phone register log phone days ago leave saudi keep add phone keep till phone register	Negative	App Store	0	1	0
App Store	5a46958f-c211-407e-bb1c-d615c18cb069	9765321278	4/8/23 0:48	Not great				en	sa	snb-mobile	The previous app was so much better, this one doesnât have a tickets option, and even my balance appears to be more or less than itâs actually is	en	previous app much good one doesnt ticket option even balance appear less actually	Negative	App Store	1	1	0
App Store	b44d0546-98f0-43b8-8296-2b70b7112e08	has120865	10/13/22 14:30	Feedback				en	sa	snb-mobile	It appears to be having a problem because it is asking for update every time I access my account. Please help to resolve it.	en	appear problem ask update every time access account please help resolve	Negative	App Store	0	1	0
App Store	e90e368d-56cb-428a-8ff0-b7fb7ec53e6c	Nema Rivilisvyhzwl	10/21/22 10:22	Brenda				en	sa	snb-mobile	Love how easy it is and I can make several payments a month	en	love easy make several payments month	Positive	App Store	0	1	0
App Store	db77965d-d0bc-42f5-97fa-c6e3bd24c00f	chad-Riyadh	9/2/23 4:51	App is not functional today				en	sa	snb-mobile	I am trying to pay sa bills through the app but my Sadad list of bills were all gone. What is happening? Please update the App	en	try pay sa bill app sadad list bill go happen please update app	Negative	App Store	0	1	0
App Store	07620f62-2936-4970-8d67-da25af1cf0e2	Me_aaa	2/11/23 3:17	Fix the app				en	sa	snb-mobile	After last update the app is automatically logging out immediately after I login..	en	last update app automatically log immediately login	Neutral	App Store	0	1	0
App Store	6329a40c-091d-4925-a0f6-75d8e0b2131d	Habeeb T H	11/22/22 3:04	No option for Moi paymet				en	sa	snb-mobile	Could not find a way to pay for expatriate services. Every time i open the app it asks for update though ther is no update	en	could find way pay expatriate service every time open app ask update though ther update	Negative	App Store	0	1	0
App Store	0daa17ee-633c-4301-872e-b5153d41079e	الرايق	4/2/23 9:17	Several attempts to login				en	sa	snb-mobile	In overall the app is excellent however several times happened that required several attempts to login and logout in a middle of activity and discovered later that been completed.	en	overall app excellent however several time happen require several attempt login logout middle activity discover late complete	Positive	App Store	1	1	0
App Store	5cbc99b3-f6aa-4de6-bdaa-5759a28aba43	umershoaib	11/1/22 7:19	Apple pay				en	sa	snb-mobile	Why with this new app i am unable to add my card to apple pay as there is no option visibleâAdd to Walletâ Overall app is good	en	new app unable add card apple pay option visibleadd wallet overall app good	Negative	App Store	0	1	0
App Store	5361274c-cfb2-45f9-b938-93dd06beb804	uuuytviud	3/10/23 5:10	Update issues				en	sa	snb-mobile	Whenever i open app it shows i need to update and when i open app store it was updated like this happens with me since last 5-6 month	en	whenever open app show need update open app store update like happen since last month	Negative	App Store	0	1	0
App Store	a0548d9d-a68c-439e-a82f-e0bbf64dc6c6	Ghazaldag	1/3/23 17:53	Best Experience				en	sa	snb-mobile	Full of functions and very easy to use best banking Application	en	full function easy use best bank application	Positive	App Store	0	0	0
App Store	186f7bd5-fb90-46fa-bc2a-2a70b256b44a	New Seasons Trading	10/2/22 10:59	Very bad experience				en	sa	snb-mobile	Not a user friendly applicationâ¦. Need many updatesâ¦ Quick-pay beneficiary should be show in detail and also should be edit able to write any nick name. If there Theree Muhammad ? How to know which I want to choose ? Itâs so confusing	en	user friendly application need many update quickpay beneficiary show detail also edit able write nick name theree muhammad know want choose confuse	Negative	App Store	1	0	0
App Store	e9514064-0679-4f59-a57a-61163487e280	Amal Castillo	11/24/22 11:23	No quality service				en	sa	snb-mobile	No one is available as always free call or in the branch i canât withdraw or buy on line only transfer money. Iâm paying my pre paid card for two years even though I stopped it.	en	one available always free call branch cant withdraw buy line transfer money im pay pre pay card two years even though stop	Negative	App Store	0	1	0
App Store	f4388ef1-9c0b-44fe-a38e-44c3c389f244	Mazzzzzen	11/28/22 16:14	Problem				en	sa	snb-mobile	Every time I receive message telling me (you have to update) even it's updated	en	every time receive message tell update even update	Neutral	App Store	0	1	0
App Store	2f185890-e0b7-4681-a948-4088a5def6dc	Dheyl balgua	5/3/23 23:59	Not a good bank				en	sa	snb-mobile	When i register my account i needâs payment method then when i input my card details My bank account got hack And all money got spent I have to be on trouble going to the bank renewed my card and pay extra money to have a new card Then they day they will give the money back but still waiting for it Now i want to install it on my phone but still asking for payment method but im too scared that m…	en	register account need payment method input card detail bank account get hack money get spend trouble go bank renew card pay extra money new card day give money back still wait want install phone still ask payment method im scar account hack	Negative	App Store	0	1	0
App Store	1b08a8c4-5028-4622-8df1-881cb9948a23	nwider	3/20/23 17:53	New app				en	sa	snb-mobile	In my opinion app color so dark I know its your logo green but I had a error in my account was shown in red and both of the colors are dark so I didnât see what was the massage and the font size was a little bit small	en	opinion app color dark know logo green error account show red color dark didnt see massage font size little bite small	Negative	App Store	1	1	0
App Store	a837921b-4146-493b-9f0e-1643c4b2ee8d	hgftuijbvgfyyg	11/23/22 6:23	Problem				en	sa	snb-mobile	I re-downloaded the app and unfortunately all the registered beneficiaries are not appearing to do transfers. Please fix the problem	en	redownloaded app unfortunately register beneficiaries appear transfer please fix problem	Negative	App Store	0	1	0
App Store	f3c68d46-24cd-41d8-a060-4902ce44c375	Yasoo747	10/1/22 14:00	Yasir				en	sa	snb-mobile	I am always using mobile application to recharge my phone lines But today I canât recharge mobily line	en	always use mobile application recharge phone line today cant recharge mobily line	Neutral	App Store	0	1	0
App Store	7249bfe1-367f-4a30-83f1-1e7ea2c3a4fc	Rukyah	11/9/22 19:45	Request updates each time				en	sa	snb-mobile	The new app request update each time I click on it. This annoying and wasting time. Is there any problems with the app to request that each time?	en	new app request update time click annoy waste time problems app request time	Negative	App Store	1	1	1
App Store	75760914-c9dc-4f47-a434-d777157bdb0d	fatmah r	10/22/22 8:42	Review				en	sa	snb-mobile	In fact, it has become slower and every time you open the application, the new application will enter you, it needs to be faster	en	fact become slow every time open application new application enter need fast	Negative	App Store	0	0	1
App Store	52a74e46-1719-4156-8c36-8d42577b2508	Samsoom49	11/1/22 19:13	Thanks Alahli				en	sa	snb-mobile	An amazing Bank thanks a lot keep up the outstanding work	en	amaze bank thank lot keep outstanding work	Positive	App Store	0	0	0
App Store	06afe821-74db-4bd1-9518-35757c678a6e	Asdvsdhjklgbu	7/30/23 12:04	Sign in problem				en	sa	snb-mobile	The application is not working in Egypt when trying to sign in using cellular data and working only with wifi	en	application work egypt try sign use cellular data work wifi	Negative	App Store	0	1	0
App Store	7c8e7099-17df-4a02-b79a-b30a31bbe215	Cealie Mattasergqael	10/21/22 9:46	Review				en	sa	snb-mobile	Thank you for having me you guys are wonderful	en	thank guy wonderful	Positive	App Store	0	0	0
App Store	6717eb11-b523-4030-9bef-1d60f31b5269	Afnanksaa	11/3/22 21:19	Not working good like previous version				en	sa	snb-mobile	It was good before after new update it appear Error lots of time while we use online transaction	en	good new update appear error lot time use online transaction	Neutral	App Store	0	1	0
App Store	dc0d9f72-c780-46c3-80c6-df1393150267	3beer1985	4/6/23 23:45	Bad service				en	sa	snb-mobile	Not all services are available to be done online. & all requests are declined. too much updates while performance are still the same . Its the worse bank anyway .	en	service available do online request decline much update performance still bad bank anyway	Negative	App Store	1	1	0
App Store	f1a08dc0-6393-4d0e-ab67-6f9254f1e8fe	Markees Govan	10/21/22 11:02	User Friendly				en	sa	snb-mobile	Really great and easy to use!	en	really great easy use	Positive	App Store	0	0	0
App Store	28bad053-7b3d-4468-b7ea-95b917427d22	HJambi	8/1/23 10:47	Bad, bad, bad				en	sa	snb-mobile	Bad bank and poor services that are not standard and differs from one branch to another, I left SNB and joined SABB and had seen a big difference from treatment to application and financial solutions. SNB must step up their game, otherwise will not be competitive with the other banks.	en	bad bank poor service standard differ one branch another leave snb join sabb see big difference treatment application financial solutions snb must step game otherwise competitive bank	Negative	App Store	1	0	0
App Store	e49b74fa-c36e-4599-b838-6e56fffffbbb	hihakeem	11/6/22 6:59	App Glitch				en	sa	snb-mobile	The new app design is nice and refreshed. However, the app keeps singing me out randomly more than once. I keep singing in, works for few seconds then sings me out again!	en	new app design nice refresh however app keep sing randomly keep sing work second sing	Negative	App Store	1	0	0
App Store	fda9a906-9b12-477c-b943-b034d5a21177	0909life	11/9/22 1:23	The worst app ever				en	sa	snb-mobile	The worst app ever and you canât make any services it gives you error every time tried to update personal information error apply for cards errors why bother make an app if it doesnât work ðð¼ðð¼ðð¼	en	bad app ever cant make service give error every time try update personal information error apply card errors bother make app doesnt work	Negative	App Store	1	1	0
App Store	59dc07d4-1138-4d5a-99e9-e61d5104d519	hgggegge	11/6/22 10:35	SNB app not working in IPHONE				en	sa	snb-mobile	I installed new SNB app and now it is not working and message appear that device is not registered. I tried by automated call but still all in vain. I called customer service but also no benefit. Could anyone help me to get rid of this issue.	en	instal new snb app work message appear device register try automate call still vain call customer service also benefit could anyone help get rid issue	Negative	App Store	0	1	0
App Store	defb1d7e-2487-4fda-97b0-31a897b63060	minzi<	10/28/22 14:25	New update				en	sa	snb-mobile	New update is not that good, only selected currency is showing even after searching it, only for selected currency, need improvement	en	new update good select currency show even search select currency need improvement	Negative	App Store	0	1	0
App Store	db8d8e6d-c799-48dd-a16c-43d37abc350d	Angry and confused 😒	9/10/23 8:47	Not bad but also not good				en	sa	snb-mobile	The bank messages is too late it nearly caused a problem with my job and some of my friends The worst experience aver	en	bank message late nearly cause problem job friends bad experience aver	Negative	App Store	1	1	1
App Store	233e1c67-2b3c-4996-99c9-989460a1d7ab	adude666	11/27/22 14:36	Not working for more than a MONTH				en	sa	snb-mobile	Itâs actually a problem we canât just go back to the old way to pay bills. We donât get bills to our houses anymore and all the info in the app. Fix this	en	actually problem cant go back old way pay bill dont get bill house anymore info app fix	Negative	App Store	0	1	0
App Store	c59896a6-28b2-424e-8d07-5490a6e0d59e	absidy0007	10/22/22 5:58	Where is the Transaction?				en	sa	snb-mobile	Why they remove the transaction? In old version there is a transaction	en	remove transaction old version transaction	Neutral	App Store	0	1	0
App Store	e72ccfba-cb25-4dcc-89c4-5e8230b9634a	YasserSobh	10/12/22 8:49	Apple Pay link				en	sa	snb-mobile	I tried to link my cards to Apple Pay but couldnât find the icon in the app	en	try link card apple pay couldnt find icon app	Neutral	App Store	0	1	0
App Store	fa9be2bc-3451-4052-8d09-91e4b39545f6	msalamer	5/6/23 9:23	Kindly your support				en	sa	snb-mobile	There is an issue when I try to log in into my account app crash ð¥ .. I try to delete it and insert it again but there is no point issue still appear.	en	issue try log account app crash try delete insert point issue still appear	Negative	App Store	0	1	0
App Store	5d258a64-905a-4efb-9e1c-2109d1ab1db1	sulaiman M T	4/17/23 9:37	Sudden repeated fast timeouts				en	sa	snb-mobile	The app. Is getting frequently timed out fast within a minute. The problem start to happen in past couple of days and wasnât taking place before	en	app get frequently time fast within minute problem start happen past couple days wasnt take place	Negative	App Store	0	0	1
App Store	06959a42-044a-461f-b951-1f41ffbcde67	محمد ٠٠٨٩	10/12/22 16:29	Can’t transfer 💁‍♂️				en	sa	snb-mobile	As always .. alahli bank release a new update with more issues.. this time I canât transfer money to local bank ð Iâm really thinking to change this bank itâs getting worse..	en	always alahli bank release new update issue time cant transfer money local bank im really think change bank get bad	Negative	App Store	1	1	0
App Store	f38e955f-d040-467c-9ce5-e828d3bb44b3	Shushta	7/9/23 18:49	Poor p rformance				en	sa	snb-mobile	Unable to add credit cards thru the application unlike other banks that which is very easy and simple moreover no one can helped I've contacted the customer care many time support without any help!!!	en	unable add credit card thru application unlike bank easy simple moreover one help ive contact customer care many time support without help	Negative	App Store	0	1	0
App Store	80e885ef-26ef-4d7c-a8b5-e458a97b2906	Salmiesy	6/21/23 8:54	Session keeps timing out				en	sa	snb-mobile	For some reason even after seconds from logging in, the app keeps loging me out. Really annoying issue.	en	reason even second log app keep log really annoy issue	Negative	App Store	1	1	0
App Store	ab637016-a732-4dbe-a1b1-a13730b1ba71	skirtk	9/19/22 12:41	New bugs need to be fixed, the app rejects logging in even though NAFATH.				en	sa	snb-mobile	Solving problemâs	en	solve problems	Neutral	App Store	0	1	0
App Store	988c91a6-5159-41de-85bd-6f9d9a16d3ec	mik3071	11/8/22 3:40	Qamar				en	sa	snb-mobile	Whatâs happening? Every time when I open the app, it takes me to the apple store to update, weird!!!!!	en	whats happen every time open app take apple store update weird	Negative	App Store	1	0	0
App Store	96c77b0e-0602-4d72-b532-57ad1ff6fb43	B.747	12/16/22 21:30	Access ability				en	sa	snb-mobile	A very complicated system and very unfriendly for using I am seriously considering closing the account and registering with another bank , and so is my wife Samba was much superior in its services	en	complicate system unfriendly use seriously consider close account register another bank wife samba much superior service	Negative	App Store	1	0	0
App Store	2b51dd43-6267-48bc-9d71-cdc86ba8604f	Tamador.h	12/12/22 13:49	Easy				en	sa	snb-mobile	Too easy to use, Thank you ð	en	easy use thank	Positive	App Store	0	0	0
App Store	1f0cee83-a4b4-4ea0-9f8a-9ccf9f8c5679	Majeed H N	11/5/22 3:36	New app is the worst				en	sa	snb-mobile	The new app is not an upgrade. There were a lot of features in the old app now itâs not there. personally, I was expecting something wow in the new app, but I got disappoint.	en	new app upgrade lot feature old app personally expect something wow new app get disappoint	Negative	App Store	1	0	0
App Store	3e679443-8fd5-477d-9ad7-baca8be09c48	bander abdulah here	10/19/22 18:36	It is really bad update				en	sa	snb-mobile	The UX and UI is so bad i guess thereâs no specialist one was in change to develop this App , i donât know till this moment how can i pay for my credit card ! Or to use it easily! What the dumb release!	en	ux ui bad guess theres specialist one change develop app dont know till moment pay credit card use easily dumb release	Negative	App Store	1	1	0
App Store	32f8d04c-1ce7-41cb-af3b-00c93e8a5ca1	dc32d414 jubail	1/14/23 22:08	Transfer between my account				en	sa	snb-mobile	Transfer between my account not completed sometimes really I feel so sad and I will find another bank.	en	transfer account complete sometimes really feel sad find another bank	Negative	App Store	1	1	0
App Store	0ec2c9d6-da76-4c2f-9455-fea62a5c4d2f	khodor94	7/5/23 6:30	Always out of service				en	sa	snb-mobile	Application is always out of service, you canât just open the app and login, always you should face issues.	en	application always service cant open app login always face issue	Negative	App Store	0	1	0
App Store	56f37c80-d744-4efc-b16c-4595a829ee15	AbuzaidSadd	1/1/23 17:00	Worst system				en	sa	snb-mobile	After the last system update , Iâm facing a lot of issues / problems, earlier features are disappeared, complex user interface. Really very bad system .	en	last system update im face lot issue problems early feature disappear complex user interface really bad system	Negative	App Store	1	1	0
App Store	99498ee5-cf2e-47a8-98c9-ce197b39d787	Thanda Khan	11/19/22 22:31	No way to add cards to Apple Pay				en	sa	snb-mobile	App has no way now to add cards credit or debit to Apple Pay. Previous app had the option, now I canât use it and it forces me to use this app and it has no option. Pathetic	en	app way add card credit debit apple pay previous app option cant use force use app option pathetic	Negative	App Store	0	1	0
App Store	a5dc1ecd-92c4-4f3b-be63-914c320d9e92	hdhaigndksjwkqhsux	4/7/23 13:50	Too many updates				en	sa	snb-mobile	The app needs to be updated in a weekly basis which not normal. Every time I use the app, I canât use it before updating which is costing a time waste.	en	app need update weekly basis normal every time use app cant use update cost time waste	Negative	App Store	0	1	0
App Store	dc38c622-2c0e-406b-9f27-523dc4520ef6	Mo Zahran	7/9/23 16:33	App is down				en	sa	snb-mobile	since few days and no communication sent to customers. This app is not up to the level and doesnât provide the value of SNB services	en	since days communication send customers app level doesnt provide value snb service	Negative	App Store	1	0	0
App Store	fcdb467f-f7bd-4b20-a01b-a2c6d928a9b5	Mo.Allo	5/5/23 1:04	The application didn’t work after last update				en	sa	snb-mobile	The application didnât work in IOS 13.7 after last update. This is for your urgent action	en	application didnt work ios last update urgent action	Negative	App Store	0	1	0
App Store	01fa98c7-4df2-4bb5-8296-6e4f066dfc3d	Gobinath bala.	10/14/22 5:28	SNB MOBILE APP				en	sa	snb-mobile	I liked this version. Well organized and very easy to use.	en	like version well organize easy use	Positive	App Store	0	0	0
App Store	8862d067-201f-4156-a8ff-7d113086a113	Arch.abadi	11/12/22 8:38	Log in problem				en	sa	snb-mobile	I canât log in for some reason Iâve been trying for 2 days now	en	cant log reason ive try days	Negative	App Store	0	1	0
App Store	17c4e9f2-c6b0-474f-9a22-28aa1077acca	Al3bbasi	10/14/22 12:14	Not working properly				en	sa	snb-mobile	Waiting for the call to register my device and still not received until now	en	wait call register device still receive	Negative	App Store	0	1	0
App Store	91499a26-4b93-4ef3-a8d9-d2faf259fb60	mousa987	8/20/22 8:05	Well done				en	sa	snb-mobile	very very beautiful	en	beautiful	Positive	App Store	0	0	0
App Store	76926a1a-7435-44e9-99dd-35d1d5fc5ed1	writethinker	4/23/23 12:56	Showing error while opening				en	sa	snb-mobile	Itâs not a user friendly app ,several times showing error while login.	en	user friendly app several time show error login	Negative	App Store	1	1	0
App Store	fe4eca91-4927-45cf-9f32-99193f6fec32	غريب في هذا الزمن	12/14/22 23:28	The old one is better than new one				en	sa	snb-mobile	The new app is full of glitches. Takes time to login. Incomplete payments, transactions and adding bills. To summarise, this is the worst app Iâve ever used!	en	new app full glitches take time login incomplete payments transactions add bill summarise bad app ive ever use	Negative	App Store	1	1	1
App Store	7936f681-38f0-4cf8-8f11-7e645526246f	SamSLAG	4/4/22 17:05	Wonderful experience				en	sa	snb-mobile	Great experience	en	great experience	Positive	App Store	0	0	0
App Store	73a42d66-238f-440a-a93c-795dd14211d3	nuni____	11/14/22 21:12	Fix your app please.				en	sa	snb-mobile	Please fix your app! Itâs unbelievable how many times it gets lagged. The previous version was so much better, I donât understand the need for this update.	en	please fix app unbelievable many time get lag previous version much good dont understand need update	Negative	App Store	1	0	1
App Store	2000fb4d-59f1-435b-b3cf-29b9d9cc8944	khaledgak	11/4/22 19:53	Not registering my mobile				en	sa	snb-mobile	Tried many times and keep getting same error, service not available now!!!	en	try many time keep get error service available	Negative	App Store	0	1	0
App Store	9d68d661-3e1d-49e0-83c4-9a7e369e346a	khaderax	10/26/22 19:57	Unable to find delete				en	sa	snb-mobile	Where is the option to delete the existing SADAD item?	en	option delete exist sadad item	Neutral	App Store	0	1	0
App Store	25a7daf4-734a-4fa0-96b9-7c9023aa66d2	Rahwa Dymott	10/21/22 9:08	Flawless				en	sa	snb-mobile	Simple processes on every steps	en	simple process every step	Neutral	App Store	1	0	0
App Store	fca55c92-e50b-48ea-9863-23a1c929e462	mohamed12345577	10/14/22 22:53	Very bad version				en	sa	snb-mobile	Itâs the worst version ever used for mobile , itâs not included the security and this version have more issues , Iâm afraid to use it ,must be checked and solving the issues	en	bad version ever use mobile include security version issue im afraid use must check solve issue	Negative	App Store	1	1	0
App Store	ead0da30-a84a-48ff-9eca-2420454bd17d	H@tim	11/10/22 16:52	Keeps crashing				en	sa	snb-mobile	After the new update, the app keeps logging me off as soon as I log in. Many transactions just wonât go through	en	new update app keep log soon log many transactions wont go	Negative	App Store	0	1	0
App Store	d59c1119-0e35-4554-9eaf-0b0d25811b6b	Abdillah75	5/4/23 15:07	Not receiving otp				en	sa	snb-mobile	Hi, your recent update seems having an issue. No otp is sent to my registered mobile phone. Please fix	en	hi recent update seem issue otp send register mobile phone please fix	Negative	App Store	0	1	0
App Store	d496a1dc-db0b-42ac-b5f5-08ca72995744	Aldulaijan Radhi	4/9/23 20:00	New update does not work				en	sa	snb-mobile	The new update is not working just keeps hanging, I wort to the but still the same,	en	new update work keep hang wort still	Negative	App Store	0	1	1
App Store	6c0cc17a-2fd1-4dd3-b4ef-a43b3cf10162	Saad_1_6	4/9/23 5:06	It doesn’t work				en	sa	snb-mobile	Whenever i try to open account it keep crashing and telling id birth date issue	en	whenever try open account keep crash tell id birth date issue	Negative	App Store	0	1	0
App Store	d099ff3c-648e-43c7-b070-7e085d968877	Fahadmalki	8/15/22 18:52	Apple wallet				en	sa	snb-mobile	Need to enhance the app to be able for adding the cards to apple wallet via the app.	en	need enhance app able add card apple wallet via app	Neutral	App Store	0	1	0
App Store	d20dc3b7-6e31-48b4-b361-4a6443821a4b	nawafashror	8/1/23 16:55	The app doesn’t work well				en	sa	snb-mobile	Kindly work and improve your app as it does always log me out of the application in the middle of process for any transactions!!!	en	kindly work improve app always log application middle process transactions	Negative	App Store	0	1	0
App Store	6a02b700-b413-4fda-b2c6-188e5150f0a1	totyjo	7/16/23 9:33	Very bad				en	sa	snb-mobile	The worst online banking experience, very poor app and bugs are coming from every thing you will try to do Nothing works	en	bad online bank experience poor app bug come every thing try nothing work	Negative	App Store	1	1	0
App Store	ed367a0e-cbbf-400d-9075-c6446ff8714a	hassansaga	10/7/22 8:55	Lots of issues				en	sa	snb-mobile	Many transitions are getting failure, but the deducting from the account The previous application was more better than this	en	many transition get failure deduct account previous application good	Negative	App Store	1	1	0
App Store	d8e0cb62-55ce-4e08-8a0a-bed56487b006	Silent Hill_430	12/6/22 12:54	Downgraded				en	sa	snb-mobile	The app looks great in terms of the appearance however the old one was much better for stability and services.	en	app look great term appearance however old one much good stability service	Positive	App Store	1	0	0
App Store	76310eb0-a2fc-45da-b3c8-ccc35826b239	Abood aa	8/31/23 9:09	The app doesn’t work				en	sa	snb-mobile	90% of the time I open it thereâs maintenance. Itâs very very unreliable I will be switching my transactions to other banks who have better apps.	en	time open theres maintenance unreliable switch transactions bank good apps	Negative	App Store	0	1	0
App Store	e5725bfa-cff3-4284-854b-0f63f026c70c	HFAEJ	12/24/22 8:51	Weak app				en	sa	snb-mobile	Doesnât reflect the size of the bank! The whole app was redesigned but there are many errors.	en	doesnt reflect size bank whole app redesign many errors	Negative	App Store	1	1	0
App Store	1395c90d-0565-4676-8a20-33b8c06a98c5	lil-Muzza	11/11/22 22:40	Bad				en	sa	snb-mobile	The app is still glitchy it wont show my correct balance and they charge alot just to transfer small amount of money!	en	app still glitchy wont show correct balance charge alot transfer small amount money	Negative	App Store	0	1	0
App Store	696dd24d-8962-4b54-8d05-8309923f6eb0	zamal56	4/3/23 10:08	Auto leasing account				en	sa	snb-mobile	I can not pay the installment for my car after the last update , it give me error	en	pay installment car last update give error	Negative	App Store	0	1	0
App Store	e80354bc-0572-41f6-9dd8-34787fb72d17	user135121	11/27/22 15:55	App				en	sa	snb-mobile	The app become so slow after the merge with samba .and it crash every single time i try to make any sign in or transfer . It was the best app and now it is the worst.	en	app become slow merge samba crash every single time try make sign transfer best app bad	Negative	App Store	1	1	1
App Store	4c242903-b63e-406f-a3ad-c875b8d6bf4c	Rne.sharp	2/24/23 7:25	Can not add my card to Apple pay				en	sa	snb-mobile	The new app does not have the option to add apple pay and I can not go back to the past version to add the card.	en	new app option add apple pay go back past version add card	Negative	App Store	0	1	0
App Store	ba578d3f-1ea8-4fb2-9e24-66cff47f6f99	@ChinoPogs	12/24/22 13:02	SNB Online Banking				en	sa	snb-mobile	I canât register on my device is very hard ,until now I canât use on my phone very hard to register. Always errors	en	cant register device hard cant use phone hard register always errors	Negative	App Store	0	1	0
App Store	626f77c0-0389-4047-8b61-977d347eea2a	kbaghdadi	4/7/23 0:38	Term Deposit				en	sa	snb-mobile	Why we cannot open a term deposit through the app?	en	open term deposit app	Neutral	App Store	0	1	0
App Store	439acadc-6938-409a-89bd-f824d2b8a114	Shak4352	7/4/23 19:46	problem the app				en	sa	snb-mobile	I cannot enter the program after the new updates, and in addition to that, I cannot updateðð»ðð»ðð»ðð»ðð»	en	enter program new update addition update	Negative	App Store	0	1	0
App Store	14e9a1b7-3bb2-433d-b3bf-c915673f89a6	soney911	4/9/23 18:47	App not opening				en	sa	snb-mobile	Its been a week that app doesnât respond, not opening. Tried reinstalling the app and problem still persists. Kindly resolve the issue asap	en	week app doesnt respond open try reinstall app problem still persist kindly resolve issue asap	Negative	App Store	0	1	0
App Store	8e5f2c97-897e-40c2-a22e-08899b7deb06	AlaaG90	12/16/22 7:09	Unstable app				en	sa	snb-mobile	The app failed to deliver the services Froze multiple time Keep changing the language Almost impossible to find the service required which is time consuming till figuring things out No pdf viewer to e statements The back ground with no option to change it The previous version was much more better	en	app fail deliver service freeze multiple time keep change language almost impossible find service require time consume till figure things pdf viewer e statements back grind option change previous version much good	Negative	App Store	1	1	1
App Store	62f7fe88-ca11-4ff7-8f1c-b3bd2c0af958	Al_Saif	11/8/22 1:13	The person who managed the design of this app should never be allowed to touch a mobile				en	sa	snb-mobile	It's worthless. The app is absolutely worthless.	en	worthless app absolutely worthless	Negative	App Store	1	0	0
App Store	1ec02418-b116-4ace-80f4-9464f321acdb	nawal_-_	9/23/22 16:53	Slow				en	sa	snb-mobile	Needs more improvement Disconnecting the old app without a backup plan was a bad move from your side	en	need improvement disconnect old app without backup plan bad move side	Negative	App Store	1	0	0
App Store	590a4a7c-98cc-4f17-a125-03656aef165e	راجو المراجو	8/15/22 21:53	Kawlan aldayer				en	sa	snb-mobile	Cannot update the expiry of the identity from the application	en	update expiry identity application	Neutral	App Store	0	1	0
App Store	c050be34-b020-4149-b3f6-db1b4edb8857	H24H24H24	8/31/23 10:03	Doesn't work on iPhone 6				en	sa	snb-mobile	We want it to work on iPhone 6,Or get an alternative that works on older versions We can't get a new device. Thanks.	en	want work iphone get alternative work old versions cant get new device thank	Neutral	App Store	0	1	0
App Store	d4a356c3-c762-4eed-8512-20dfe530f05c	GDMedina	4/13/23 13:11	Stop updates every 2 days thats unbelievable				en	sa	snb-mobile	Stop updates every 2 days thats unbelievable	en	stop update every days thats unbelievable	Negative	App Store	1	0	0
App Store	22a63e41-2e42-4ad1-ac82-94dea205d1b6	cfeycsfy	5/28/23 12:05	Doesn't open				en	sa	snb-mobile	The app only opens when enter apple store, it can't open directly from home screen.	en	app open enter apple store cant open directly home screen	Negative	App Store	0	1	0
App Store	3fd4ea75-ff4b-4945-bd1b-37cd724bf770	iSarahhh	5/28/23 9:22	Bad application				en	sa	snb-mobile	Every paycheck day same issue , not working the application is very bad and its time for me to switch to another bank	en	every paycheck day issue work application bad time switch another bank	Negative	App Store	1	1	0
App Store	7e63e07f-7793-4736-9dd0-f73ce5398c29	Masulai	9/3/23 11:38	Not necessary information !				en	sa	snb-mobile	Why do I need to allow my location service to enter my account ?!!!!	en	need allow location service enter account	Negative	App Store	1	0	0
App Store	311d57eb-7693-4c0e-8258-ab6fc7f1bef9	Abo-alhish	11/11/22 16:28	Exelaint				en	sa	snb-mobile	Very easy to use	en	easy use	Positive	App Store	0	0	0
App Store	198770a1-d721-4e50-bf59-38f80e1a45ed	Nodasliora	4/27/23 18:30	Poor Experience				en	sa	snb-mobile	If there was a rating less than a star I wouldâve chose itâ¦	en	rat less star wouldve choose	Negative	App Store	1	0	0
App Store	5ce81c0e-bae7-4c85-a4ef-7aa74d93baaf	khaled565	4/7/23 7:59	So many updates!!!				en	sa	snb-mobile	Every single day there's new update, this is ridiculous. Solve this problem please	en	every single day theres new update ridiculous solve problem please	Negative	App Store	1	0	0
App Store	97e33967-4465-4240-91f3-856316215eb1	alotaibi34	12/13/22 13:14	The last version it is bad				en	sa	snb-mobile	The last version donât open in some phoneâs I donât why ? How I can open my application?	en	last version dont open phone dont open application	Negative	App Store	0	1	0
App Store	c914baa1-08cf-48dd-8573-0105420ceee1	ghapot	10/19/22 7:28	QuickPay				en	sa	snb-mobile	Iâm sending through QuickPay for 12 years now, the update is good but sending money gets complicated.. Please fix this.. thank you	en	im send quickpay years update good send money get complicate please fix thank	Negative	App Store	1	0	0
App Store	ab17e80a-aa56-4365-b59e-3b1bb5b23d7d	HAleeZa	4/7/23 4:05	Car lease				en	sa	snb-mobile	Car lease option always showing error codes and 99% does not work	en	car lease option always show error cod work	Negative	App Store	0	1	0
App Store	2724ac39-658e-4639-9d80-13a9679daa0c	Abadiip	12/28/22 14:45	Can’t log in				en	sa	snb-mobile	I canât log in to my account because the password field accepts only 7 characters.	en	cant log account password field accept character	Negative	App Store	0	1	0
App Store	deaeee72-27fe-4034-acd2-261d6c20061f	Ashwag1417	10/23/22 14:34	need to update immediately 👎🏻				en	sa	snb-mobile	I canât open my account itâs keep loading and not working.. plzzz check for the app	en	cant open account keep load work plzzz check app	Negative	App Store	0	1	0
App Store	e32a46e7-518b-4771-a984-66df50ccfed9	modyms	5/17/23 22:17	The new app doesn’t accept the IBAN of other banks				en	sa	snb-mobile	The new app doesnât accept the IBAN of other banks this made me open a new account at Al Rajhi bank who had much better evaluation.	en	new app doesnt accept iban bank make open new account al rajhi bank much good evaluation	Negative	App Store	1	1	0
App Store	56e1ae5a-0013-4700-9686-ed29da2b7990	DanishKSA	5/14/23 13:08	SSL Pinning Error , iOS Application not working				en	sa	snb-mobile	SSL Pinning Error, not able to login, Even i tried without other mobile. iOS is upto date. Reporting from iPhone 7 iPhone XS	en	ssl pin error able login even try without mobile ios upto date report iphone iphone xs	Negative	App Store	0	1	0
App Store	61c3b806-70c7-44aa-b4ae-8295bde33925	B27B	4/24/23 9:46	Review				en	sa	snb-mobile	Worst bank application ever, every time i open the app it requests for an update, and never noticed any improvement!	en	bad bank application ever every time open app request update never notice improvement	Negative	App Store	1	1	0
App Store	1e1912cf-bb80-4be8-a0a8-1ca3dfbadae4	z.alsayed	12/14/22 19:33	App crash				en	sa	snb-mobile	App crash with last update and there is no any response from the bank	en	app crash last update response bank	Negative	App Store	0	1	0
App Store	31b1f63c-3cde-45a4-936b-026d9a01b4f0	Ffffff26	11/16/22 8:19	LOG-IN ISSUE				en	sa	snb-mobile	I cannot able to log in which I provide all the correct information	en	able log provide correct information	Negative	App Store	0	1	0
App Store	43e4b37a-9a41-438a-bfdb-cef14086665d	edoka0872	10/19/22 20:33	It has gotten worse				en	sa	snb-mobile	The old version was so mutch better this version doesnât even let me to login	en	old version mutch good version doesnt even let login	Negative	App Store	1	1	0
App Store	2341638b-6079-4ccf-87d9-92a1a0611638	Demented_Terminator	4/23/23 16:07	The app doesn’t work				en	sa	snb-mobile	Since the last update the app freezes at startup fix it!!!	en	since last update app freeze startup fix	Negative	App Store	0	0	1
App Store	55460b7f-2576-42f6-b472-c551e4bb6a6d	Abo_Aseel	9/25/22 22:04	Bad update				en	sa	snb-mobile	Always keep crashing. Not as easy as the old one. Need a lot of improvement	en	always keep crash easy old one need lot improvement	Negative	App Store	1	1	0
App Store	84804e38-5e5a-4075-aadc-3b95be3a7210	Mb1934764	5/7/23 8:59	Not working				en	sa	snb-mobile	Last version not opening on my iPhone	en	last version open iphone	Negative	App Store	0	1	0
App Store	c96cdcb4-20c9-4033-aaaa-7d6ce72685b6	أم حدور	4/7/23 13:44	Beneficiaries name error				en	sa	snb-mobile	All the beneficiaries written in arbic it becomes only *** in description name evevn after i delete them and register it again	en	beneficiaries write arbic become description name evevn delete register	Neutral	App Store	1	1	0
App Store	0a57eba9-521f-4645-af97-472b77eda1e2	chdjdigufudjehr	4/3/23 9:18	Cant even open a bank account through the app				en	sa	snb-mobile	Shame	en	shame	Negative	App Store	1	0	0
App Store	c5534440-82c1-4703-b1bd-843e9d0fe7fb	BaderAl	3/6/23 14:07	E Statement				en	sa	snb-mobile	I cannot print out the last two months statements, itâs only possible to get the last year statements	en	print last two months statements possible get last year statements	Negative	App Store	0	1	0
App Store	13795a23-ca16-4f84-a8bc-6bd6d38acc81	تطبيق سيئ	4/3/23 20:28	Thank you				en	sa	snb-mobile	The best bank ever ððð¤ð¤thanks	en	best bank ever thank	Positive	App Store	0	0	0
App Store	233e9209-a3e4-4753-a5fc-305f2b36fae3	giddjndsthj	11/20/22 14:45	Saudin international students				en	sa	snb-mobile	As Iâm studying outside Saudi Arabia I canât use the app for transfer or or pay Sadad because it shows that Iâm using VPN while I donât just being outside Saudi Arabia	en	im study outside saudi arabia cant use app transfer pay sadad show im use vpn dont outside saudi arabia	Neutral	App Store	0	1	0
App Store	36018fd5-68b3-491d-8301-eddcbd2272af	Black Thender 99	8/21/23 11:21	It’s not working				en	sa	snb-mobile	Pls fix this problem I did the impossible but it doesnât work	en	pls fix problem impossible doesnt work	Negative	App Store	0	1	0
App Store	32e03a55-0b11-409b-80c8-e574ac0a7e37	Totti511	7/14/23 20:31	SNB will never improve				en	sa	snb-mobile	The app is really outdated and feels like the old Stone Age. SNB will never change nor improve. I really prefer Alrajhi app. The app really needs a radical approach to improve its app.	en	app really outdated feel like old stone age snb never change improve really prefer alrajhi app app really need radical approach improve app	Negative	App Store	1	0	0
App Store	b6eecc5e-adb2-440b-978c-a6461ddd9073	jubara	11/8/22 8:33	Bad ux , old is better				en	sa	snb-mobile	Very bad experience, Iâm trying to understand why you change the old one .. this app the worst app ever	en	bad experience im try understand change old one app bad app ever	Negative	App Store	1	0	0
App Store	108f7dfc-d549-49c4-9b2f-f98a7e3615d3	7modi7yati	8/3/23 21:04	Do not recommend using this app				en	sa	snb-mobile	The worst banking app I have ever used It is not handy, very slow, and very limited	en	bad bank app ever use handy slow limit	Negative	App Store	1	0	1
App Store	ac3d380f-dfdb-4c60-b7e3-9a57824b396a	Kidwa1989	1/6/23 19:11	Very bad experience with the app				en	sa	snb-mobile	Every time I log in it kicks me out with message that says my session is expired !!!! Please do something	en	every time log kick message say session expire please something	Negative	App Store	0	1	0
App Store	00509780-f83a-4544-8c95-a1c0bc654f2a	fay.22122	1/5/23 14:04	Bad experience				en	sa	snb-mobile	Keeps logged out with each click !!!	en	keep log click	Neutral	App Store	0	1	0
App Store	c0fdfe9c-3e6a-4076-bb94-5b362209026e	hehdixk	12/27/22 10:15	Bad update				en	sa	snb-mobile	This new update has an issue that log you out of the app. I canât make any transactions	en	new update issue log app cant make transactions	Negative	App Store	0	1	0
App Store	41345529-e670-4c75-90b5-efdeb7dc1d5c	malikmalik1982	10/26/22 16:19	New app is not good				en	sa	snb-mobile	App is not good and so hard to find options, for example I have spent so much time and couldnât find Alien control.	en	app good hard find options example spend much time couldnt find alien control	Negative	App Store	0	1	0
App Store	a6e363c7-451f-4be8-ad08-85ca9530b171	دحــؤمϟ.	9/15/23 11:45	Log in				en	sa	snb-mobile	I can't login to my account it always says there's a problem	en	cant login account always say theres problem	Negative	App Store	0	1	0
App Store	8fcb9f52-1a65-44d1-8912-025506d82f1a	Os Iae	4/3/23 11:36	Complaining				en	sa	snb-mobile	Your app is very slow Every update you make Makes it slower!!!	en	app slow every update make make slow	Negative	App Store	0	0	1
App Store	908d21ac-226a-45ab-ac8b-7d8f1da52698	Esam Salem	12/8/22 6:05	I can not open it				en	sa	snb-mobile	It has maximum characters for the password, so I canât write my password right	en	maximum character password cant write password right	Negative	App Store	0	1	0
App Store	9008f1f6-d5fc-4019-97b5-77c9b2e79d76	Mohamed Ayadd	10/27/22 23:51	Old Application Was Better				en	sa	snb-mobile	Old application was better, easy to navigate and more informational	en	old application good easy navigate informational	Positive	App Store	1	0	0
App Store	bccab08c-4e7e-41f4-857e-278c680f2a0a	Asma.H	10/29/22 10:11	SADAD				en	sa	snb-mobile	Unfortunately, I canât see my Sadad payments. Iâve been trying to pay my dies, yet nothing is working out? Can this issue be solved ASAP?	en	unfortunately cant see sadad payments ive try pay die yet nothing work issue solve asap	Negative	App Store	0	1	0
App Store	c5c89ed4-a65b-46f2-acbb-cd2db204eb93	Dvkpfazv	10/23/22 19:27	App review is full of fake accounts				en	sa	snb-mobile	If you look closely at the name of all the reviewers who have rated this app 5 stars all of them are dummy names.	en	look closely name reviewers rat app star dummy name	Negative	App Store	1	0	0
App Store	cfaae01e-3f6e-453d-ba6b-14635730f17a	mu mobile21	6/26/23 14:54	Problem				en	sa	snb-mobile	I have a problem in the applycation it refused open	en	problem applycation refuse open	Negative	App Store	0	1	0
App Store	0f8ce5a8-8fda-44ff-9a0e-c4bb03c0a695	meeear	11/30/22 22:47	The app is rubbish 😪👎🏻				en	sa	snb-mobile	Nothing to say about it , just we need SNB to fix the issue on the app or bring back the old version.	en	nothing say need snb fix issue app bring back old version	Negative	App Store	0	1	0
App Store	e15231b9-7ed3-49ba-b1e1-82e3d8b09962	Dani Fremd	10/31/22 22:36	After update the app is not working				en	sa	snb-mobile	After the update the app is not working	en	update app work	Negative	App Store	0	1	0
App Store	29cac351-36d2-4e43-adec-28dd0c39d73a	malikmatro	10/13/22 13:03	Can’t Setup Token				en	sa	snb-mobile	No option to setup Token. Tried doing it on my desktop and got an error. The old app was just fine.	en	option setup token try desktop get error old app fine	Negative	App Store	0	1	0
App Store	89088960-94fd-42d0-aeb3-17e19b6a32e9	27.08.1994	4/7/23 13:40	Great app				en	sa	snb-mobile	Easy to use ðð»	en	easy use	Positive	App Store	0	0	0
App Store	5ba2b821-6a0d-4d2d-b87f-88fc9c83f8ba	Zman eL3jaib	4/8/23 17:34	Asking for update every time , every day				en	sa	snb-mobile	Asking for update every time , every day	en	ask update every time every day	Neutral	App Store	1	0	0
App Store	e15dbb30-f685-471c-9bde-fedad77192b4	shimul(from Bangladesh)	4/7/23 16:03	Apps not working				en	sa	snb-mobile	The updated version not working on my iphone 6.	en	update version work iphone	Negative	App Store	0	1	0
App Store	a737f278-3203-439d-8d75-b5dec2307f53	destroyergiant	4/7/23 1:03	App is not working				en	sa	snb-mobile	My phone is iPhone 6 Plus and the app is not working in this phone anymore	en	phone iphone plus app work phone anymore	Negative	App Store	0	1	0
App Store	35825958-7526-462c-a03d-5968c7d225c2	باسل جفراوي	3/15/23 20:47	Don’t force me to update				en	sa	snb-mobile	Donât force me to update While travelling no enough data maybe	en	dont force update travel enough data maybe	Negative	App Store	1	1	0
App Store	0922fc68-ae86-46cd-b918-fe985265a775	Cfghjjk	2/17/23 9:47	Where is the add to apple pay option?????????				en	sa	snb-mobile	Please add the option to add card to apple pay, its been a yearâ¦	en	please add option add card apple pay year	Neutral	App Store	0	1	0
App Store	8c25578d-6997-4a10-b12a-17c2cffc5c41	SFKCO	1/5/23 23:18	Not working repeated !!😡				en	sa	snb-mobile	The worst app ever most of the time not working (something went wrong) almost every weekend â¦!!!! I missed samba ð	en	bad app ever time work something go wrong almost every weekend miss samba	Negative	App Store	1	1	0
App Store	b0afc749-0a1b-4d62-bc3e-d517fadc463b	شريك مرسول	11/9/22 17:37	Couldn’t download				en	sa	snb-mobile	I am trying to download the app but couldnât Could you sort it out please	en	try download app couldnt could sort please	Negative	App Store	0	1	0
App Store	da4299a7-5b28-4841-aa2e-7a5e37e63809	Mansour almalki	10/30/22 21:47	It not up to the expectations				en	sa	snb-mobile	It is one of the worst banks app I have ever used I hope the learned from Alrajhi or their old version	en	one bad bank app ever use hope learn alrajhi old version	Negative	App Store	1	0	0
App Store	34448f30-5c4c-4bdb-9b71-c8b6f1e0e1c2	SilverBlinky	5/11/23 9:40	Keep crashing				en	sa	snb-mobile	App keeps crashing cant open	en	app keep crash cant open	Negative	App Store	0	1	0
App Store	ac2e4e0a-8edd-469f-bc95-3a5722f9d566	justThe_fact	4/7/23 21:40	Worst				en	sa	snb-mobile	Why they have to update many times. 50x per month likeâ¦ but whyð	en	update many time x per month like	Negative	App Store	0	0	0
App Store	7d509713-706b-4762-80a3-2155f472810a	biggdaddy88	11/29/22 21:55	New app is trash.				en	sa	snb-mobile	Worst banking app ever. Down most of the times. Pushing me to switch my account to another bank.	en	bad bank app ever time push switch account another bank	Negative	App Store	1	1	1
App Store	627c519a-2ea9-4a77-906d-df6b06335e59	Salrumman	11/27/22 12:40	Bad app				en	sa	snb-mobile	This app is so bad and doesnât work most of the timeâ¦ A bank as Alahli bank should has a good technical staff and support	en	app bad doesnt work time bank alahli bank good technical staff support	Negative	App Store	1	1	0
App Store	d76c958a-e207-4fac-9cc9-3dc5f070b5b1	Gaisuana	11/23/22 18:47	Unable to login after update				en	sa	snb-mobile	Canât sign in, after entering OTP app goes back to login screen	en	cant sign enter otp app go back login screen	Negative	App Store	0	1	0
App Store	366c07f3-27dd-4641-9778-194a119efd36	IqbalFalatah	10/16/22 19:00	OTP not sent				en	sa	snb-mobile	I didnât receive OTP I tried many times but still not received Until now	en	didnt receive otp try many time still receive	Negative	App Store	0	1	0
App Store	45cebb71-6180-457a-a473-b50be6d7a0ed	m4043	9/18/22 8:14	it need an update to fix the bugs				en	sa	snb-mobile	today i needed to do an important transfer but because the app asked for a registration call but i didnât receive i waste half an hour because the lock due to the multiple try	en	today need important transfer app ask registration call didnt receive waste half hour lock due multiple try	Negative	App Store	0	1	0
App Store	93f43cb5-8e10-4cdb-9743-58a3ec2da75d	Eng.analuai	2/19/23 16:57	Bad one				en	sa	snb-mobile	This would be a worst app you might use. It is bad as much as the rest of the services of the SNB.	en	would bad app might use bad much rest service snb	Negative	App Store	1	0	0
App Store	13a741a6-0436-455e-9847-a1540db005b0	athulesh	12/26/22 4:58	Very bad				en	sa	snb-mobile	How many times to try for registering the caustmor care calling only for Arabic no English or other languages very bad	en	many time try register caustmor care call arabic english languages bad	Negative	App Store	1	1	0
App Store	a6a0dfb6-e61b-489d-bf24-4f23d6ff7847	Riyadh1727	10/7/22 18:32	I can’t use Apple Pay				en	sa	snb-mobile	Since the update I canât use Apple Pay. Is it really our bank or a hacker?	en	since update cant use apple pay really bank hacker	Negative	App Store	0	1	0
App Store	6b237525-dc16-4483-be4e-714f3e7a9ba5	ahmedrshid	7/13/23 16:50	خدمة سيئة				en	sa	snb-mobile	Please fix the error in adding cards to Apple Pay. Bad services. Adding the cards to Apple Pay doesn't work since months.	ar	please fix error add card apple pay bad service add card apple pay doesnt work since months	Negative	App Store	1	1	0
App Store	bc7dca07-5851-49a1-bf63-e37a27c65cef	menan123	8/15/22 11:47	Mannan				en	sa	snb-mobile	Interface is nice but its too slow, previouse app was very fast	en	interface nice slow previouse app fast	Negative	App Store	1	0	1
App Store	1f52a035-ddbe-42ef-b507-6f8f43ac764c	zxcv14	5/28/23 8:40	The new update has error				en	sa	snb-mobile	There is no Sadad option	en	sadad option	Negative	App Store	1	1	0
App Store	833a3d5b-d384-46ef-b0e2-f7fed4b94b89	Mhabbad	3/15/23 18:07	Thank you				en	sa	snb-mobile	For me this bank is the best and the app is very easy to use and clear	en	bank best app easy use clear	Positive	App Store	0	0	0
App Store	ad9a0be6-7aed-43d3-b409-755e397b5bcb	صاحب السيارات	11/5/22 16:03	مشاكل الدخول				en	sa	snb-mobile	It always gives errors massage when u trying to loginâ¦â¦ so horrible	en	always give errors massage u try login horrible	Negative	App Store	1	1	0
App Store	a7ceef63-a330-41d7-9f3e-fe72eafa0885	bigbrudaman	10/14/22 21:54	Super slow!				en	sa	snb-mobile	Worst experience ever. The new update is extremely slow!!!	en	bad experience ever new update extremely slow	Negative	App Store	1	0	1
App Store	533cf6fd-881f-4004-bc6d-bbef8f81b1a6	Abbas Alojami	10/12/22 20:58	Worst experience ever				en	sa	snb-mobile	The app is too stupid and keep crashing and asking to login	en	app stupid keep crash ask login	Negative	App Store	1	1	0
App Store	704ee84a-1e06-4472-bf24-b9123edc6679	asalafi85	8/19/22 22:00	What’s wrong with SNB applications!				en	sa	snb-mobile	There is several applications for one bank! And itâs all not working probably!	en	several applications one bank work probably	Negative	App Store	1	1	0
App Store	bf02c602-7d49-4111-92a2-7877531fef81	Rawabi77777ggg	5/24/23 14:24	Bad Application				en	sa	snb-mobile	Bad Application, always have errors. Donât try to install it, itâs really really bad	en	bad application always errors dont try install really really bad	Negative	App Store	1	1	0
App Store	06fe4754-56c1-4068-aec6-623e93be3c14	Elgazawi	12/3/22 13:54	Bad version				en	sa	snb-mobile	Many features removed. This is the worst update ever	en	many feature remove bad update ever	Negative	App Store	1	0	0
App Store	681046c1-e57f-4216-8cc1-a043066bfa41	Ironclub	6/10/23 18:35	Poor				en	sa	snb-mobile	The poorest bank here in Saudi Arabia, they canât even afford to pay English speaking employee for Costumer Service	en	poor bank saudi arabia cant even afford pay english speak employee costumer service	Negative	App Store	1	0	0
App Store	d7908747-22d0-402f-93c0-e677608ec924	Lolalelele	3/23/23 13:37	Very bad				en	sa	snb-mobile	Am gonna transfer to another bank	en	gon na transfer another bank	Neutral	App Store	0	1	0
App Store	996401e0-ee75-41b0-ac54-078cf8679845	jm-mac	1/28/23 9:13	Unknown errors				en	sa	snb-mobile	Always have errors in sending money with no suggessted solutions at all.	en	always errors send money suggessted solutions	Negative	App Store	0	1	0
App Store	33f9c621-3872-4926-b2b2-a9b2b8144b70	اتمنى يكون فيه حل	7/12/23 11:22	😡😡				en	sa	snb-mobile	Why doesn't he accept to add the card in the wallet?	en	doesnt accept add card wallet	Neutral	App Store	0	1	0
App Store	3bbe76c4-d833-420b-9146-a11cdfd478c1	snooooty	4/1/22 10:59	Perfect App				en	sa	snb-mobile	Nice interface ð	en	nice interface	Positive	App Store	0	0	0
App Store	7ee661cd-ba59-46fd-af84-c99b992f714e	jaber8966	12/26/22 7:37	Trash App				en	sa	snb-mobile	I cannot see my virtual cards details, I canât even add them to apple pay.ð¡	en	see virtual card detail cant even add apple pay	Negative	App Store	0	1	0
App Store	0fce8bb5-73a4-4b1e-93dc-27002bd424ca	JPBNRS	11/11/22 11:33	Poor service				en	sa	snb-mobile	Canât log in	en	cant log	Neutral	App Store	0	1	0
App Store	93a8e67f-f721-4af5-854a-d94afc39f180	Muath 07	10/27/22 9:38	Impractical				en	sa	snb-mobile	many errors in this new version!	en	many errors new version	Negative	App Store	0	1	0
App Store	c60f41fa-a0f8-4210-939d-43653a88f3f7	arsalan mahi	11/10/22 5:39	LOGGING ISSUE				en	sa	snb-mobile	WHEN I LOGIN INTO APP , it suddenly shows "your session has expired, login again" Can you please fix this bug	en	login app suddenly show session expire login please fix bug	Negative	App Store	0	1	0
App Store	e7659e84-c52c-4d42-a7e9-7d9bdcba9cac	Mero_Aljej	12/19/22 23:49	Bad update				en	sa	snb-mobile	The old version was better!!!!	en	old version good	Neutral	App Store	1	0	0
App Store	d518f4e2-438d-45b9-ad03-6733a41b0179	Soudah2010	11/4/22 5:11	Very bad App with alot of errors				en	sa	snb-mobile	The previous app is much better the new version Since 1 week I'm not able to pay car monthly instalment Where ever you press it gave error Please please Need previous version	en	previous app much good new version since week im able pay car monthly instalment ever press give error please please need previous version	Negative	App Store	0	1	0
App Store	823f29ff-acf8-4f72-8107-b0ba0fe89aa4	It's helpful & useful!!	10/21/22 15:46	Bad update				en	sa	snb-mobile	Itâs too bad and not as good as we thought.	en	bad good think	Negative	App Store	1	0	0
App Store	58903ca4-8bf0-4fac-ada8-b12738c14f48	GelLachica	10/25/22 9:40	Failing Update				en	sa	snb-mobile	The app is very slow and always a failing after installing the new app.	en	app slow always fail instal new app	Negative	App Store	0	1	1
App Store	6d799895-bb2e-4654-b6aa-1f851b7d14d5	Seon yo	3/15/23 20:16	Useless				en	sa	snb-mobile	No improvement on this app	en	improvement app	Negative	App Store	0	0	0
App Store	6a020467-9ebd-4e42-9d31-5ca65a22dc32	a very very cool ninkname	4/10/23 8:14	app is outdated compared to its competitors				en	sa	snb-mobile	filled with bugs and not reliable at all! i have to use the website to check my info, thankfully itâs not my main bank account	en	fill bug reliable use website check info thankfully main bank account	Negative	App Store	0	1	0
App Store	a1873bcd-1bdd-4221-b799-9ed7ce9b014a	رغوده جده	10/23/22 5:39	Shut down your bank				en	sa	snb-mobile	Ø³ÙØ¡ Ø³ÙØ¡ Ø³ÙØ¡ ÙØ§Ø¨Ø¹Ø¯ Ø¯Ø±Ø¬Ø© "The worst app I've ever used in my life." Im Not staying for a single more minute "Im not staying for a single more minute."	ar	bad app ive ever use life im stay single minute im stay single minute	Negative	App Store	1	0	0
App Store	20063527-cd49-4cee-9001-72690f23bd6b	jonny tear	10/13/22 8:20	app crush				en	sa	snb-mobile	after updating to IOS 16 app doesn't work keep crushing	en	update ios app doesnt work keep crush	Negative	App Store	0	1	0
App Store	d3757936-82b7-41e2-8999-1d10e4813e50	faramsam	11/11/22 15:31	Bad app				en	sa	snb-mobile	Very bad app always not working same like ATM and the bank branch Shame on you as big bank I miss SAMBA bank	en	bad app always work like atm bank branch shame big bank miss samba bank	Negative	App Store	1	1	0
App Store	c6e902e5-48e7-433b-a006-5cabef688340	MYM.Sawadi	11/11/22 0:31	Become the worst banking app ever				en	sa	snb-mobile	Delete the app and ues the banking phone easier.	en	delete app ues bank phone easy	Neutral	App Store	0	1	0
App Store	8fbf0ef3-7d7c-4071-bdc5-8add38934755	Abdullah61631	10/28/22 23:24	Bad experience				en	sa	snb-mobile	i prefer the old version	en	prefer old version	Neutral	App Store	1	0	0
App Store	d2f53ebb-efef-40b8-99b2-56418c7ce887	Anas 990	11/8/22 3:23	Best Banking App				en	sa	snb-mobile	Professional, Formal and elegant	en	professional formal elegant	Positive	App Store	1	0	0
App Store	7cacc2e7-7920-49f2-a7b9-6bb63a1bce87	Old-customers	3/16/23 22:05	Sad for you				en	sa	snb-mobile	When we was under Samba App and Bank was Great Now its the worst Application and Support in KSA	en	samba app bank great bad application support ksa	Negative	App Store	1	0	0
App Store	b258b8d6-e311-4815-94b7-a53a6243d9ae	yousefmaddah	12/9/22 11:08	App				en	sa	snb-mobile	App has is closing every time i open itâ¦	en	app close every time open	Negative	App Store	0	1	0
App Store	ebac0c0d-03bb-4851-b401-818565761dd1	arbeegee	10/23/22 16:08	Can’t log in				en	sa	snb-mobile	Loads for hours and canât log in â¦	en	load hours cant log	Negative	App Store	0	1	0
App Store	40ba69a8-315f-498c-939e-95c00eefe816	Majed mosad KSA	1/11/23 12:51	iPad in not support full screen ..old APP is spported				en	sa	snb-mobile	Down ðð»	en		Neutral	App Store	0	0	0
App Store	9e4a86d0-58f0-47f5-a875-3d543db05e0e	Chinitoprinze	2/6/23 15:10	NcbXSabb				en	sa	snb-mobile	Since the 2 bank merged it becomes the worst application . Always update! Update! Updat	en	since bank merge become bad application always update update updat	Negative	App Store	1	0	0
App Store	d429fc41-ddbe-479d-820b-4662f28fdd41	almaan0d	3/14/23 18:19	Not work				en	sa	snb-mobile	The new version not working in iOS	en	new version work ios	Negative	App Store	0	1	0
App Store	5a367f16-b744-47f1-89e1-a533c730e57f	xi_96	10/31/22 21:59	I				en	sa	snb-mobile	It is downgrade not an upgrade. The app is too slow.	en	downgrade upgrade app slow	Negative	App Store	1	0	1
App Store	1d8be7ef-cb2a-416a-a274-f2c40eaf4ef1	SamyaHasan	7/22/23 15:41	Doesn’t work after updating				en	sa	snb-mobile	It doesn't work after the update.	ar	doesnt work update	Negative	App Store	0	1	0
App Store	cf72c847-69c3-4817-92fc-aa30cc742eb1	أحلى لعبه تستاهل تحميلها	3/14/23 13:47	So bad app				en	sa	snb-mobile	Not easy not clear Complicated app Lots of issues !!	en	easy clear complicate app lot issue	Negative	App Store	1	0	0
App Store	2f30f263-8726-485a-b2d1-5a3a2747afc0	turki9974	6/12/23 7:07	Garbage				en	sa	snb-mobile	Out of service all the time Worst Bank with garbage App	en	service time bad bank garbage app	Negative	App Store	1	0	0
App Store	1333e404-6e17-40be-9c58-0bdfece7acc9	nalhowity	8/31/22 16:17	Lak Reward				en	sa	snb-mobile	I wish to add a window for checking the Lak rewards balance.	ar	wish add window check lak reward balance	Neutral	App Store	0	1	0
App Store	a816e13b-0f97-455d-a00c-2d8fa4d9d9a8	Hanashahrani	2/11/23 7:48	Apple wallet				en	sa	snb-mobile	Hello there is an issue with this update its not include adding cards to apple wallet!!	en	hello issue update include add card apple wallet	Negative	App Store	0	1	0
App Store	6f4b7040-c7ff-4134-a7ae-0f155b931b54	mshokl11111111	1/3/23 12:24	Y				en	sa	snb-mobile	Why is it asking me to update every single entering?!	en	ask update every single enter	Negative	App Store	0	1	0
App Store	8838af47-c948-41f0-adbb-93f9134b9c62	Kol411	11/28/22 22:32	Very bad				en	sa	snb-mobile	Always cant transfer money it is bad app	en	always cant transfer money bad app	Negative	App Store	1	1	0
App Store	189363bd-3d29-4b76-a42e-a0f2d7719933	tellngthetruth	10/16/22 22:22	Laggy				en	sa	snb-mobile	Super slow , laggy, doesnât send activation codes The worst ever!	en	super slow laggy doesnt send activation cod bad ever	Negative	App Store	1	0	1
App Store	ea6ce106-7cde-412a-a418-716e9265c7e9	awfsabban	12/5/22 19:29	Poor				en	sa	snb-mobile	Worst version of alahli mobile app	en	bad version alahli mobile app	Negative	App Store	1	0	0
App Store	4ddbbe6f-8919-45d4-9df8-f5ab7fb43c78	Mod2i	8/3/23 13:03	Crach				en	sa	snb-mobile	Application crash !!! Plz fix the problem	en	application crash plz fix problem	Negative	App Store	0	1	0
App Store	59ba1e1d-4cd2-42dc-9b41-1c05038f6a0c	Aqk 123	4/19/23 7:18	Blocked in Pakistan				en	sa	snb-mobile	Why this app doesnt work in Pakistan?? I am on vacation and the app is blocked by SNB to work in Pak.	en	app doesnt work pakistan vacation app block snb work pak	Negative	App Store	0	1	0
App Store	447b5507-83a1-4f52-a4d7-be36400eb8cb	Salman0-0	6/22/23 22:58	APP				en	sa	snb-mobile	The new version is always down ðð½	en	new version always	Negative	App Store	0	1	0
App Store	ebbfa71d-2156-45f6-863d-5477711f84bd	agehdbbh ghhh hhj	4/10/23 1:41	Hi				en	sa	snb-mobile	I phone 6 plus phone not working in this app Not open	en	phone plus phone work app open	Negative	App Store	0	1	0
App Store	ce782793-974c-4ffa-b5e8-523a76fa8d7b	aygahman	10/14/22 13:32	Total crap				en	sa	snb-mobile	This new update is a total crap, it feels like a sham.	en	new update total crap feel like sham	Negative	App Store	1	0	0
App Store	574830d5-8b63-4fa4-b171-823ff0db86fb	مُنايا	3/15/23 16:41	So bad				en	sa	snb-mobile	Every time need to do update	en	every time need update	Neutral	App Store	0	0	0
App Store	473128ce-f3ea-48c7-b2e8-c77396f29ee7	na2112na	11/11/22 17:19	I love the bank				en	sa	snb-mobile	but unfortunately the app is bad	en	unfortunately app bad	Negative	App Store	1	0	0
App Store	fbdef8dc-9242-4110-a6ec-ee900b3ece96	merm1234	10/20/22 20:34	I cant update i dont know why				en	sa	snb-mobile	Help me	en	help	Neutral	App Store	0	1	0
App Store	34187006-c7cd-4d30-a008-42a0243b68cc	i9fwan9333	5/13/23 12:42	Not working				en	sa	snb-mobile	Your app is not F working for a long time now!!!	en	app f work long time	Negative	App Store	0	1	0
App Store	99238162-ebce-4d11-b8fb-30ad4ae84b32	2723168Nn	5/13/23 10:51	So bad				en	sa	snb-mobile	So bad application ever ! Need improvement	en	bad application ever need improvement	Negative	App Store	1	0	0
App Store	7ba0dd94-849d-4b57-9817-f973bb2074b8	userald	12/13/22 20:15	ياليت تخففون التحديثات				en	sa	snb-mobile	Every week, there is an update of well wishes. Dec 13th new update!!!! Come on youâve gotta be kidding you guys! This is ridiculous.	ar	every week update well wish dec th new update come youve get ta kid guy ridiculous	Negative	App Store	1	0	0
App Store	97bbea04-99a8-4e01-8c9e-30a7e721cfa3	alffaress	5/2/23 17:05	Not working				en	sa	snb-mobile	not working	en	work	Neutral	App Store	0	1	0
App Store	e74cf3f3-7bde-45b2-8372-7e151828848f	Eye’s Doc	9/5/23 4:46	Bad app				en	sa	snb-mobile	Itâs worst bank app I have seen ever	en	bad bank app see ever	Negative	App Store	1	0	0
App Store	60cd7200-6d01-4273-a22e-eca31b7a38f8	vasilottayil	10/25/22 18:36	Confused				en	sa	snb-mobile	So snb Alahli app is not used anymore ? Is it changed to snb mobile ?	en	snb alahli app use anymore change snb mobile	Neutral	App Store	0	1	0
App Store	08053828-d93f-48d1-ab84-3db2107fe882	tufel ahmad	10/13/22 12:22	Good				en	sa	snb-mobile	To translate the name "Tufel Ahmad" from Arabic to English, it would retain its original pronunciation and spelling.	ar	translate name tufel ahmad arabic english would retain original pronunciation spell	Neutral	App Store	1	1	0
App Store	2bc357e0-1208-48d4-bf0b-2fb5c01e123a	Faahvahwvahwavhwavavbq	6/26/23 7:53	Wallet Isshue				en	sa	snb-mobile	Why I donât enter the card in wallet application	en	dont enter card wallet application	Neutral	App Store	0	1	0
App Store	0e4d2301-1c62-4f0f-b48d-5c0e58a39d61	mozayed22	4/3/23 23:45	Very bad				en	sa	snb-mobile	The worst banking app I have ever seen	en	bad bank app ever see	Negative	App Store	1	0	0
App Store	5bdc585a-7a43-439d-b427-300570b837a3	BanditoBoi	12/13/22 7:57	Worst bank ever				en	sa	snb-mobile	Just donât.	en	dont	Neutral	App Store	0	1	0
App Store	3154d7b9-7666-4bb5-9a61-30ccd04c8c61	الظاهرة رونالو	4/30/23 18:03	Very bad application				en	sa	snb-mobile	The worst update ever and ever	en	bad update ever ever	Negative	App Store	1	0	0
App Store	13a7d959-b759-438d-889e-8d01ce88103f	iFaisal_0	1/9/23 10:52	!!				en	sa	snb-mobile	Itâs very bad you can learn from Al Rajhi bank	en	bad learn al rajhi bank	Negative	App Store	1	0	0
App Store	0e2c7b4a-e13d-4d34-88a4-030b9c978fd7	benfahad	11/28/22 18:27	Not good				en	sa	snb-mobile	One of the worst banks in saudi on online services	en	one bad bank saudi online service	Negative	App Store	1	0	0
App Store	0cf605a4-75c9-41dd-86c0-994564898c78	jianavhin	4/19/23 11:43	snb apps				en	sa	snb-mobile	not working should be this only for the new phone only	en	work new phone	Negative	App Store	0	1	0
App Store	64f1a4ae-4dc1-4fe9-b7a2-add8f8c5a175	Munirah Abdullah	5/24/23 10:22	We want something like AlRajhi Bank app				en	sa	snb-mobile	Despite all your updates, we haven't seen anything useful.	ar	despite update havent see anything useful	Negative	App Store	0	1	0
App Store	c0c200b3-860d-444d-8e8b-6bee5c7baa48	Ahmdenee	8/2/23 1:15	Bad				en	sa	snb-mobile	Worst bank app ever	en	bad bank app ever	Negative	App Store	1	0	0
App Store	29b85256-8092-4bba-9ebd-c42429d0c44e	mr / sozen	10/18/22 12:26	Dose not support Arabic language!!				en	sa	snb-mobile	No Arabic language in this app	en	arabic language app	Negative	App Store	0	1	0
App Store	05bbbcf5-019c-4714-87dc-6e5c41b9ec11	Abood-s	4/8/23 14:20	eStatment				en	sa	snb-mobile	Electronic statements service not working.	en	electronic statements service work	Negative	App Store	0	1	0
App Store	bdb782cd-e1f3-4396-bbe1-18a504b4689e	العالمي الأصفر	5/28/23 7:37	The worst				en	sa	snb-mobile	The worst banks application ever.	en	bad bank application ever	Negative	App Store	1	0	0
App Store	06c9b823-c47f-4b47-9bed-6dd48926c3cf	fayezzzzz1	12/1/22 5:01	Fayez				en	sa	snb-mobile	The worst Saudi bank app	en	bad saudi bank app	Negative	App Store	1	0	0
App Store	a1291cd8-188e-462b-877d-8091de455292	b11ak199	10/23/22 8:50	The worst bank ever				en	sa	snb-mobile	The worst bank and program ever.	ar	bad bank program ever	Negative	App Store	1	0	0
App Store	d80b04e9-eb26-4bdb-9d7c-e6fed9a0427c	hamaad111222	10/15/22 9:57	Bad				en	sa	snb-mobile	Baddest one	en	baddest one	Positive	App Store	1	0	0
App Store	413a5b3e-1ed1-4e53-9bac-de233057ad98	Abdullah228	7/22/23 0:31	التطبيق معقد وسيء				en	sa	snb-mobile	I called them and a customer service representative explained to me, but even after his explanation, I didn't understand how to do a certain thing in the application. Honestly, the old application was better.	ar	call customer service representative explain even explanation didnt understand certain thing application honestly old application good	Negative	App Store	1	1	0
App Store	30d8d8c9-22a4-4aef-a725-6bd3d363ef30	tgfrdes	11/5/22 12:52	Alaa				en	sa	snb-mobile	Not the best	en	best	Negative	App Store	0	0	0
App Store	80884c0d-ffc2-4a73-be0f-9227de59f028	maghrama	7/19/23 21:47	LIFE IS ,,, SNB				en	sa	snb-mobile	M.MAGHRABI	ar	mmaghrabi	Neutral	App Store	1	0	0
App Store	be2af05f-fb24-4ef3-9ee1-4d8cbaa80fd9	Mnirahhh	4/4/22 15:07	👍				en	sa	snb-mobile	ððð	und		Neutral	App Store	0	0	0
App Store	794729cc-c458-4045-a45e-024f55866ab8	mrscience2020	9/18/22 22:33	سئ				en	sa	snb-mobile	Bad	ar	bad	Negative	App Store	1	0	0
App Store	64f627a7-c789-4044-8ef6-5561ccb2181a	Abd_ll	9/11/23 11:44	اختراق خصوصية العميل				en	sa	snb-mobile	In the latest update, Al Ahli Bank forces you to specify your own location in order to allow you access to your account, even though there is no benefit to the location in using the application. I contacted the Saudi Arabian Central Bank and they clarified that it is a personal decision from the bank and not based on their directives.	ar	late update al ahli bank force specify location order allow access account even though benefit location use application contact saudi arabian central bank clarify personal decision bank base directives	Neutral	App Store	0	1	0
App Store	6382b5a2-94c9-484a-99ca-b1ec150f9bb2	Azez999	9/5/23 8:36	أسوأ تطبيق وأسوأ بنك				en	sa	snb-mobile	I don't know what the website has to do with entering the application. What is your relationship with us that you force us to open the device's website? Are you a government program? You are just a bad bank and program. Insha'Allah, I won't use the application anymore.	ar	dont know website enter application relationship us force us open devices website government program bad bank program inshaallah wont use application anymore	Negative	App Store	1	1	0
App Store	f148d191-adf4-497a-b0b2-4737a88003ba	خالي 23	9/4/23 13:19	طلب الموقع اصبح الزامي				en	sa	snb-mobile	In the new update, the application does not open unless location services are enabled, which is very annoying.	ar	new update application open unless location service enable annoy	Negative	App Store	1	1	0
App Store	03c9bf6a-9290-4a12-bedf-3ed2558f7544	Tefany	9/4/23 3:13	بيانات موقع العميل لماذا اجبارية				en	sa	snb-mobile	The requirement of allowing the program to use the geographic location was added without mentioning it explicitly in the update details, and without specifying or guaranteeing the use and sale of this data. This is a policy of deception and disrespect towards the customer.	ar	requirement allow program use geographic location add without mention explicitly update detail without specify guarantee use sale data policy deception disrespect towards customer	Negative	App Store	1	1	0
App Store	d8c32bae-d2e7-4b58-a4e9-231b0f0705df	B7er	9/3/23 18:39	التحديث الاخير سيء				en	sa	snb-mobile	It only opens when enabling location is mandatory.	ar	open enable location mandatory	Neutral	App Store	0	1	0
App Store	6a910b7f-a794-4e7e-97ec-6b90e793293e	nooo667	9/3/23 15:06	سيء جدا				en	sa	snb-mobile	Bad application	ar	bad application	Negative	App Store	1	0	0
App Store	1805a2c4-7dbf-44a5-962a-e91689924243	oudafr	9/3/23 12:58	يجبرني على الوصول للموقع				en	sa	snb-mobile	At first, the website used to be optional, then it became a choice, and now it's mandatory. Why? I deleted it and I feel relieved, except for privacy, Snb.	ar	first website use optional become choice mandatory delete feel relieve except privacy snb	Neutral	App Store	1	1	0
App Store	d9f866c1-d9b3-4056-851a-ded9fada5982	Mhammed1322	7/14/23 8:01	عدم اضافة بطاقة مدى ابل باي				en	sa	snb-mobile	For more than three months, I have been trying to add a Mada card to my iPhone mobile phone, but it keeps getting rejected. What are the reasons for this and why only Al Ahli Bank of Saudi Arabia, and not other banks?	ar	three months try add mada card iphone mobile phone keep get reject reason al ahli bank saudi arabia bank	Negative	App Store	0	1	0
App Store	dcfd7b8d-0fe6-4964-b727-7e5b3f7fc998	@_Princesultan	7/21/23 20:51	خطأ بالتحديث ؟؟				en	sa	snb-mobile	He has a watch that keeps spinning and it is not willing to update. The IT department in Al-Ahli Bank needs rehabilitation.	ar	watch keep spin will update department alahli bank need rehabilitation	Negative	App Store	1	0	0
App Store	f801a0f5-e4fa-4085-a751-66acadb8b131	أبومحمد الخالدي	7/21/23 15:34	سيء جدا				en	sa	snb-mobile	A very bad application from the bank that constantly malfunctions. Imagine registering and then being asked to go through numerous verification steps. And even after overcoming the major hurdle, it does not allow transfers until 48 hours have passed!	ar	bad application bank constantly malfunction imagine register ask go numerous verification step even overcome major hurdle allow transfer hours pass	Negative	App Store	1	1	0
App Store	e05eb17b-f090-4cfd-9ea9-38c24139fa9b	ابو سطور	7/20/23 15:17	اسوء تطبيق بنكي في السعوديه 👎👎👎👎👎👎👎				en	sa	snb-mobile	The worst application, always hanging and updates are pointless.	ar	bad application always hang update pointless	Negative	App Store	1	0	1
App Store	39127127-af37-4ec0-81b3-a01632fb4d1b	𓆩(تٌـكُـيِـدَآ)𓆪	6/21/23 23:15	تطبيق جداً ضعيييييف				en	sa	snb-mobile	By Allah, the application is very poor. Every time I enter, it says "we are doing our best to help you" but you are fools.	ar	allah application poor every time enter say best help fool	Negative	App Store	1	0	0
App Store	531cd6f0-a117-43cb-843c-c514f586a29d	na20l	4/10/23 21:06	ً				en	sa	snb-mobile	I find it annoying that I can only transfer when I update. Sometimes I need to transfer now.	ar	find annoy transfer update sometimes need transfer	Negative	App Store	1	1	0
App Store	d6b4ae2d-3c57-4022-9ae5-d764b73ade26	worst app had to use??	3/27/23 11:27	أسوأ تحديث				en	sa	snb-mobile	The application is not working properly! - It takes 10 to 20 seconds to bypass the login interface! - The application needs an update and a change in the user interface to be light and easy to use. - When logging in, it gives you an error and exits the application. - Many operations give an error message. The update should be compatible with the updates and versions of modern devices. Other banki…	ar	application work properly take second bypass login interface application need update change user interface light easy use log give error exit application many operations give error message update compatible update versions modern devices bank apps beautiful easy use	Negative	App Store	0	1	1
App Store	e1ec3fa0-1f61-4009-be3e-e9bed1ffc0b1	AAi70	4/5/23 0:56	اللغه المستخدمة في البرنامج				en	sa	snb-mobile	It is shameful, stupid, and disrespectful to our customs and values that a bank with an Arabic name and meaning uses the English language as its interface and program foundation. No matter what changes occur, it always reverts back to English. The primary language should be Arabic, and the rest can be accessories, but you have failed in this regard, which is not surprising considering your progra…	ar	shameful stupid disrespectful customs value bank arabic name mean use english language interface program foundation matter change occur always revert back english primary language arabic rest accessories fail regard surprise consider program	Negative	App Store	1	0	0
App Store	8c2ef962-b438-4259-894c-e02723ee02ac	مالك شغل ١١١١١	4/4/23 5:19	فاشل بعد التحديث				en	sa	snb-mobile	The application does not work after the update.	ar	application work update	Negative	App Store	0	1	0
App Store	13ef65c3-3055-469a-9d96-4a87bb3619da	black17cat	4/4/23 1:02	دا انجليزي يامرسي				en	sa	snb-mobile	All the reviews are written in English. Definitely these are the customers who have no installments, are not involved with debts, and their eyes are not swollen from insurance. ð¤£	ar	review write english definitely customers installments involve debts eye swell insurance	Neutral	App Store	1	0	0
App Store	0705cdc9-42a8-4296-9268-5873eea4f288	lodi.sa	4/3/23 10:18	اسوء بنك بالعالم كله وليس فقط بالسعودية				en	sa	snb-mobile	From my personal point of view, this is the worst bank. If it were up to me, I would never have dealt with it, but unfortunately my salary is deposited there. I feel sorry for everyone who uses it as their main bank. I don't know why you bought Samba Bank when you can't even manage your own bank? If someone asked for my opinion, I wouldn't even think about recommending it. ð¤¢ð¤®	ar	personal point view bad bank would never deal unfortunately salary deposit feel sorry everyone use main bank dont know buy samba bank cant even manage bank someone ask opinion wouldnt even think recommend	Negative	App Store	1	0	0
App Store	01bd67f5-8328-4a15-9edb-4d77eb565c15	HoS Am	3/28/23 0:04	التحديث				en	sa	snb-mobile	After the update, it gives me a crash and doesn't open. Please help me, for God's sake! I hope someone responds.	ar	update give crash doesnt open please help gods sake hope someone respond	Negative	App Store	0	1	0
App Store	3e9c1e7e-6592-4726-94f0-f42f65f00b49	ايري دبجك	3/27/23 4:26	فاشل				en	sa	snb-mobile	The worst bank and the worst program that puts you on an application on the Play Store. I don't know why, but it was a big mistake to open an account and put my salary with you.	ar	bad bank bad program put application play store dont know big mistake open account put salary	Negative	App Store	1	1	0
App Store	a8f0c160-a428-4d6f-aa12-c81c92d541d8	سعد ٦	3/27/23 3:07	لم يصل للمستوى المطلوب				en	sa	snb-mobile	An application that does not suit the work of Al-Ahli Bank, even the information of the debit card does not appear properly. It is somewhat complicated; I hope it is reviewed and the errors are improved, and suitable services are introduced for the customers.	ar	application suit work alahli bank even information debit card appear properly somewhat complicate hope review errors improve suitable service introduce customers	Negative	App Store	1	1	0
App Store	baa63d07-e993-4405-a6bc-c35c95e0be80	ثقيف الحجي	3/26/23 20:56	تعبت				en	sa	snb-mobile	Many times, the verification code does not reach despite numerous attempts.	ar	many time verification code reach despite numerous attempt	Negative	App Store	0	1	0
App Store	cb3c355e-bcb4-4447-a057-6ef3012e2b16	هــﯧْۧــمۭــۏﯟۏۥ	3/26/23 13:40	بنك فاشل				en	sa	snb-mobile	He does not deserve to be called a bank.	ar	deserve call bank	Negative	App Store	1	0	0
App Store	049655b9-eb9b-42a8-ba23-0af35780f4b3	D7ME222	3/24/23 20:16	اخر تحديث لايعمل				en	sa	snb-mobile	The latest update is not working with my iPhone 11 Pro Max. The latest update is not working. Please solve the issue.	ar	late update work iphone pro max late update work please solve issue	Negative	App Store	0	1	0
App Store	1309c812-33a3-4f5c-b312-f2f501e79c8f	احمد قديد	3/23/23 20:35	تطبيق فاشل				en	sa	snb-mobile	"Fail, my worst experience is with the worst service application from the worst bank. Learn from Al-Rajhi."	ar	fail bad experience bad service application bad bank learn alrajhi	Negative	App Store	1	0	0
App Store	ed550410-c017-457f-8e13-5c0755c03f79	ناااهش	3/23/23 6:27	اعوذ بالله لين متا يالاهلي				en	sa	snb-mobile	The worst application that you might come across.	ar	bad application might come across	Negative	App Store	1	0	0
App Store	9298a2b9-9541-40ae-8578-586fd48d5162	Omiga ali	3/22/23 7:24	سيء نوعًا ما				en	sa	snb-mobile	Al Rajhi Bank application is the best by far.	ar	al rajhi bank application best far	Positive	App Store	0	0	0
App Store	03604cc6-e2dc-4859-a202-731a32a6ed98	mrmjooood	1/3/23 0:03	سيئ				en	sa	snb-mobile	The new update is bad and impractical, just beautiful graphics only - the old one was much better and more functional and very easy - in addition, every time I press the program icon, the new update takes me to the Apple Play program and then redirects me to the program.	ar	new update bad impractical beautiful graphics old one much good functional easy addition every time press program icon new update take apple play program redirect program	Negative	App Store	1	0	0
App Store	d21332c3-04cb-4059-8638-fe4667907c39	snb ahli	11/28/22 16:41	تطبيق بنك الاهلي الجديد				en	sa	snb-mobile	Very bad. The old version was better. Every time I enter the application, it logs me out automatically. Please solve the problem. Thank you.	ar	bad old version good every time enter application log automatically please solve problem thank	Negative	App Store	1	1	0
App Store	c1372f93-28af-47b3-8da3-b78df7b02205	nafil.77	11/27/22 9:04	اسواء تحديث				en	sa	snb-mobile	We have lost many services and it is not understood.	ar	lose many service understand	Negative	App Store	1	0	0
App Store	02622692-8d53-458f-9445-8f2ed79a2583	Skainen	11/26/22 10:54	تحديث فااشل				en	sa	snb-mobile	He often hangs up and only logs in after 20 attempts. The same thing happens during the transfer and suddenly logs out while using it. By God, the old version was better. This app is full of endless malfunctions and problems. On top of that, it gives you a customer service number and when you call it, they say the number is incorrect!!!!!!!	ar	often hang log attempt thing happen transfer suddenly log use god old version good app full endless malfunction problems top give customer service number call say number incorrect	Negative	App Store	0	1	1
App Store	bbac9302-f346-444c-9df8-9bcce96c2627	أتأمل حلاتك	11/26/22 7:55	مشكلة في التطبيق				en	sa	snb-mobile	Every time I open the application, it crashes unexpectedly and a message appears saying "The page has expired" ð	ar	every time open application crash unexpectedly message appear say page expire	Negative	App Store	0	1	0
App Store	ee53961d-defa-48e8-a46e-85078a9bce80	Azoz00	9/20/23 3:35	يرجى تحسين الدخول السريع				en	sa	snb-mobile	I wish for the improvement of quick entry through fingerprint without the need to enter numbers.	ar	wish improvement quick entry fingerprint without need enter number	Positive	App Store	0	1	0
App Store	62b705c2-7137-43ad-925d-b4bd60bbd411	شخص متفائل	11/22/22 23:15	مره ما عجبني القديم افضل				en	sa	snb-mobile	The old is much better, there is no development.	ar	old much good development	Negative	App Store	1	0	0
App Store	4f6e70bb-7fd3-485f-9aac-342c326fe417	السعوديه وطن العز	11/21/22 12:39	⁉️معلق ويرفض تسجيل الدخول				en	sa	snb-mobile	The problem is that everyone keeps saying that there are problems and we don't see any solution, and the problem keeps transferring from one application to another, and it's all getting worse. Okay, what about our money? How is it doing?	ar	problem everyone keep say problems dont see solution problem keep transfer one application another get bad okay money	Negative	App Store	1	0	0
App Store	09547cb5-6da8-412b-9052-687b2aabeea5	A beer.abeer	11/18/22 9:24	تسجيل دخول				en	sa	snb-mobile	I have been trying for a month to log in to the application and it doesn't work! I have contacted the bank more than once and the problem still hasn't been solved! I can't access my account or transfer money or do anything! All my matters are on hold.	ar	try month log application doesnt work contact bank problem still hasnt solve cant access account transfer money anything matter hold	Negative	App Store	0	1	0
App Store	56d07936-715b-4f18-af67-00c8b3348760	mahfsm	11/18/22 1:08	هام جداً				en	sa	snb-mobile	If you stick to the old version, I'll tell you that the update is very bad. I haven't seen any improvements, on the contrary, completely the opposite. Thank you.	ar	stick old version ill tell update bad havent see improvements contrary completely opposite thank	Negative	App Store	1	0	0
App Store	2a236dac-ae55-4f0a-b428-e8bfa4172780	خخخلود .م	11/17/22 8:38	سيي جدا				en	sa	snb-mobile	I can't open my account. The automated response keeps saying there's always an error. I hope you can solve the problem.	ar	cant open account automate response keep say theres always error hope solve problem	Negative	App Store	0	1	0
App Store	0823e498-e403-4ea8-b29d-82707558d8fa	hima11100	11/16/22 21:06	تطبيق سئ جدا				en	sa	snb-mobile	The visual appearance of the application is excellent, but the usability is very poor.	ar	visual appearance application excellent usability poor	Negative	App Store	1	0	0
App Store	0d6371e3-03a1-4b0b-8b31-7908cf3b1bcb	Abulayab40	10/21/22 23:17	مشكلة في التطبيق				en	sa	snb-mobile	More than once, when I try to make a transfer, it gives me a rejection and asks me to try again, and this keeps happening to me for days.	ar	try make transfer give rejection ask try keep happen days	Negative	App Store	0	1	0
App Store	4bf1d63e-3e47-4242-a2b5-c88c331f859c	Alzabidi	10/21/22 21:09	تسرع البنك بالانتقال للتطبيق الجديد				en	sa	snb-mobile	The program is not reliable, it is full of errors and problems.	ar	program reliable full errors problems	Negative	App Store	0	1	0
App Store	2be98032-988b-4e08-bd16-84909e474866	96H4E0	10/21/22 19:52	الاهلي				en	sa	snb-mobile	The program is not good and I do not recommend anyone to download it. I mean, if they are using the program before this one, I advise them to stick to it.	ar	program good recommend anyone download mean use program one advise stick	Negative	App Store	1	0	0
App Store	8450b73a-b6f6-483d-9953-33716be32b3d	حذاري من بعض البرامج الاسلامية	10/21/22 17:21	لتطوير تجربتك يرجى تحديث التطبيق				en	sa	snb-mobile	Dear good people, I don't want to improve my experience. I am satisfied with the old application. It has the same number and it didn't work. Even its design is gloomy and feels dark, as if there is no one in the room. Honestly, it was a bad experience and my experience has not progressed, it has regressed. It took a long time to even get one star, which is a loss.	ar	dear good people dont want improve experience satisfy old application number didnt work even design gloomy feel dark one room honestly bad experience experience progress regress take long time even get one star loss	Negative	App Store	1	0	0
App Store	3f5bfcd7-76ef-4257-914f-73631d1f6668	aa2500nn	10/21/22 11:44	سيء جدا				en	sa	snb-mobile	A beneficiary was added to my list without my knowledge and activation. When I added a new beneficiary, the bank requested that I activate all beneficiaries. I added all the beneficiaries and upon reviewing the list, I found a beneficiary that I did not recognize, so I deleted it.	ar	beneficiary add list without knowledge activation add new beneficiary bank request activate beneficiaries add beneficiaries upon review list find beneficiary recognize delete	Neutral	App Store	0	1	0
App Store	eff47d4d-c274-442a-b375-127ca385c038	صبرينكو تيليكوم	10/20/22 21:09	الاخطاء				en	sa	snb-mobile	When entering the application, it goes to the update first, then it opens the application. The option to update personal information is not working. Please perform maintenance on the application and fix the errors.	ar	enter application go update first open application option update personal information work please perform maintenance application fix errors	Negative	App Store	0	1	0
App Store	0f3b58cc-b931-4388-b6f4-f028665906d2	^R^2020	10/19/22 22:18	تطبيق سيء				en	sa	snb-mobile	There are too many problems with the application and it is in desperate need of improvement. We experience frequent disruptions due to issues with the application. It is the worst banking application.	ar	many problems application desperate need improvement experience frequent disruptions due issue application bad bank application	Negative	App Store	1	1	0
App Store	354d4b03-ecb3-4dfa-972a-ef15f754ec28	Metri13	10/19/22 5:00	يحتاج تعديل				en	sa	snb-mobile	The old one feels more organized, but this design looks modern and minimalistic. However, the tasks are not clear and it is greatly condensed compared to how good it looks. The performance is faster though.	ar	old one feel organize design look modern minimalistic however task clear greatly condense compare good look performance fast though	Positive	App Store	1	0	0
App Store	2fa3bd92-439c-416c-af27-274174069e3a	اطياف هادئه	10/15/22 22:31	التحديث فيه خلل				en	sa	snb-mobile	The update is bad and I'm not sure if it's genuine or a hacker.	ar	update bad im sure genuine hacker	Negative	App Store	1	0	0
App Store	d7ddf85c-972c-4db2-9ce3-28caa1392bf5	mmooodee	4/24/22 1:07	الدخول السريع				en	sa	snb-mobile	Quick entry is not working.	ar	quick entry work	Negative	App Store	0	1	0
App Store	acd26879-cc44-414f-aee8-58c5b736f633	MM100000000000000	9/21/23 11:01	التطبيق فاااااشل				en	sa	snb-mobile	They brought back the first application, it's really terrible. It's unacceptable that we can't see the accounts, the balance, or transfer between accounts.	ar	bring back first application really terrible unacceptable cant see account balance transfer account	Negative	App Store	1	1	0
App Store	a85112a2-3850-49c1-8796-882ba7461412	Hasan Mashat	9/20/23 8:16	تطبيق سيئ				en	sa	snb-mobile	The application is bad despite all the updates that have been made to it in the past period. It is required to re-register the device (mobile) if you have not accessed the application for a certain period of time. Additionally, no transfers or payments can be made, even with a small amount, until 48 hours after registering the device. The excessive security measures limit the benefits of using th…	ar	application bad despite update make past period require reregister device mobile access application certain period time additionally transfer payments make even small amount hours register device excessive security measure limit benefit use bank service make negative feature instead positive one	Negative	App Store	1	1	0
App Store	47033177-b62c-45c4-82ad-f30467ba94f0	Mruqai	9/18/23 16:39	متعبين				en	sa	snb-mobile	This bank was, continues to be, and will remain tiring.	ar	bank continue remain tire	Negative	App Store	1	0	0
App Store	f4b46b02-27c2-45be-8a1e-897b814d4b6c	هـ ع ص	9/9/23 7:37	عدم التمكن من التحديث الجديد				en	sa	snb-mobile	Unable to access the bank application and it asks for an update. However, when trying to update, it fails to complete.	ar	unable access bank application ask update however try update fail complete	Negative	App Store	0	1	0
App Store	bd687182-4676-4d6f-b395-65ed2ce029e7	al njoom	9/15/23 21:41	صيانة - صيانه				en	sa	snb-mobile	Maintenance takes two days. And what should I do if I have an urgent operation?	ar	maintenance take two days urgent operation	Neutral	App Store	1	0	1
App Store	adbd4fe7-2774-4173-8e33-e4c067b0d0c3	ابوعلي حمود	9/15/23 9:11	مشاكل كثيره				en	sa	snb-mobile	After the update, it has become worse.	ar	update become bad	Negative	App Store	1	0	0
App Store	f0da68ec-2af3-4841-bd20-794d743adc19	لهده-	9/13/23 15:50	سئ جداً				en	sa	snb-mobile	Very bad.	ar	bad	Negative	App Store	1	0	0
App Store	22deffe0-c784-416e-865a-400931afedd7	BAN.AQ	9/12/23 19:09	من رمضان نفس المشكله				en	sa	snb-mobile	Since Ramadan, the program has not been working after the update. I have tried all the solutions, such as deleting and waiting for another update, but unfortunately, the program remains on the bank's logo without opening the login screen. What's worse is that all the employees deny the existence of a problem, despite Twitter and this platform being filled with complaints. Now I have to conduct my…	ar	since ramadan program work update try solutions delete wait another update unfortunately program remain bank logo without open login screen whats bad employees deny existence problem despite twitter platform fill complaints conduct transactions computer even every week computers authentication cancel wait hours able use online bank service dont know happen ahli bank	Negative	App Store	1	1	0
App Store	2efeb8c9-6e2b-4410-9118-e574a6d6e1ca	فوزه 11	9/12/23 4:41	جده .				en	sa	snb-mobile	I wish that the online ID update service is activated so that we don't need to visit the branch to update it. ð	ar	wish online id update service activate dont need visit branch update	Neutral	App Store	0	1	0
App Store	df9f9f5a-2a6e-477c-82d4-456a83cded60	Mahdi Mohammad M	9/11/23 20:56	تطبيق لا يليق بأكبر بنك في الشرق الاوسط وشمال افريقيا				en	sa	snb-mobile	Version 1.6.26 claims to have features related to financing, early payment, and 20% repayment, but after the update, none of these services are available. Unfortunately, it is simply false information. I hope you compare your application to Al Rajhi Bank's application. Are you satisfied with yourselves and your application? All the services with Al Rajhi Bank are now online, unlike yours.	ar	version claim feature relate finance early payment repayment update none service available unfortunately simply false information hope compare application al rajhi bank application satisfy application service al rajhi bank online unlike	Negative	App Store	1	1	0
App Store	a2b45431-553c-4a84-99de-a2e6d69ba87d	ابو عوده 11	9/10/23 20:13	لو تفكوه من التحديثات الي كل يومين كان افضل				en	sa	snb-mobile	Every two days they request an update and the application is like it's constantly changing.	ar	every two days request update application like constantly change	Neutral	App Store	0	1	0
App Store	3dcf70dd-2739-4563-9902-c709908148a3	بدر هوساوي	9/10/23 11:04	تطبيق فاشل جمله وتغصيل				en	sa	snb-mobile	Lots of updates + lots of malfunctions + maintenance of the application at the wrong times = Customers escaping to other banks, and I am one of them.	ar	lot update lot malfunction maintenance application wrong time customers escape bank one	Negative	App Store	0	1	0
App Store	797f155f-2715-47b6-b55d-556c2c7e4c5d	Umm Haifa	9/10/23 10:24	مهم				en	sa	snb-mobile	It doesn't open for me.	ar	doesnt open	Negative	App Store	0	1	0
App Store	998a0905-18fa-4d82-b1cb-73c4e1315987	عبدالمجيد الصاعدي	9/10/23 9:17	التطبيق				en	sa	snb-mobile	The application is terrible and broken. It used to be a gaming application, not a banking and transfer application. The transfers are delayed.	ar	application terrible break use game application bank transfer application transfer delay	Negative	App Store	1	1	1
App Store	47fb6bdc-5ac6-4923-b84f-4cffc4f8874f	MunaAlruma	9/7/23 23:11	التحديث الاجباري				en	sa	snb-mobile	It means I have a terrible internet connection, why do you make the update of the app mandatory?	ar	mean terrible internet connection make update app mandatory	Negative	App Store	1	1	0
App Store	1134fc6d-d9fc-44ad-ba61-74d239c5cd21	G7x1	9/8/23 12:05	انتهاك للخصوصية				en	sa	snb-mobile	Who are you to impose on me to give you the permission to violate my privacy? You are just a dispensable bank and it is my privilege that I deal with you.	ar	impose give permission violate privacy dispensable bank privilege deal	Negative	App Store	1	0	0
App Store	d4e26e58-01dd-4b94-bf57-7289d51d6b43	Abeery🦋	9/8/23 5:09	سي جداً جداً. على كذا راح نغير البنك.				en	sa	snb-mobile	It is very, very difficult. There is no ease in using it. Updates constantly. And after updates, it becomes worse than before. I wish it had flexibility and ease of use like other banks. Even the ratings are low.	ar	difficult ease use update constantly update become bad wish flexibility ease use like bank even ratings low	Negative	App Store	1	0	0
App Store	1b848dd0-891b-4c9b-b0c3-e59a31192692	احمد الفريدان	9/6/23 9:16	.				en	sa	snb-mobile	You overwhelmed us with updates, the more an application updates, the worse it becomes.	ar	overwhelm us update application update bad become	Negative	App Store	1	0	0
App Store	1fd358f9-9b81-4dc0-b4e3-2759818ce450	K010.D	9/7/23 7:01	جيد في كل شي الا اذا جاء الموضوع لاختلاس				en	sa	snb-mobile	If you were exposed to embezzlement and the code is accessed, they will not return your money and accuse you of sharing the code, thus making the purchase process your consent ð	ar	expose embezzlement code access return money accuse share code thus make purchase process consent	Negative	App Store	0	1	0
App Store	77d0f4b4-64c3-41f3-bda6-ffe4281b38ce	لا اله إلا الله ❤️	9/6/23 20:25	..				en	sa	snb-mobile	I hope for the development and update of the application to improve the speed of transfers, bill payments, and the addition of a debit card in Apple Pay.	ar	hope development update application improve speed transfer bill payments addition debit card apple pay	Positive	App Store	0	1	0
App Store	4f8099c2-ff74-4707-a9da-0cdf3c35e139	mostafa bin m	9/6/23 18:19	.				en	sa	snb-mobile	Using the website is mandatory!	ar	use website mandatory	Neutral	App Store	1	1	0
App Store	37c2c262-c726-4d6e-82a5-7ffd3e1d1da7	poi159510	9/6/23 10:26	التطبيق ضعيف وغير سلسل				en	sa	snb-mobile	The application is weak and not reliable. I have tried multiple times to transfer, but it is not recognizing the accounts. Also, it is unable to recognize the invoices.	ar	application weak reliable try multiple time transfer recognize account also unable recognize invoice	Negative	App Store	1	1	0
App Store	7123476d-6ed0-4aba-a9b9-082bf2b480ea	ذلنفع	9/5/23 6:57	تقييم				en	sa	snb-mobile	Under experiment.	ar	experiment	Neutral	App Store	0	1	0
App Store	5d201629-3e6b-4a72-ae21-29839352d0f1	No0or88	9/6/23 4:27	كثير التحديثات مزعج				en	sa	snb-mobile	Many updates have become annoying.	ar	many update become annoy	Negative	App Store	1	0	0
App Store	09a09ded-acbd-4a38-92d8-d873b8290e35	maxman900009	9/5/23 16:42	بنك معفن				en	sa	snb-mobile	Poor services	ar	poor service	Negative	App Store	1	0	0
App Store	22c9f852-3dcf-4dd1-914b-bafb83c81232	أبو-سارة	9/5/23 10:10	لا استطيع تحميل او تحديث				en	sa	snb-mobile	He asked me to update, but I couldn't, and it was deleted and tried to download again, but unfortunately without success. Thank you.	ar	ask update couldnt delete try download unfortunately without success thank	Negative	App Store	0	1	0
App Store	38e08164-823a-4fba-98c0-f308c66d3e19	snp/zoze.d1413	8/31/23 0:02	يحتاج الى تطوير				en	sa	snb-mobile	It needs much more development than it was before.	ar	need much development	Neutral	App Store	1	0	0
App Store	bc86f34a-05a7-4904-9db9-30bab2d77c30	Islam abdelraouf	9/4/23 15:57	لابد ان تفوقوا				en	sa	snb-mobile	This application is not at all suitable for AlAhli Bank of Saudi Arabia. There are many problems inside the application, including but not limited to: - After activating the quick login fingerprint, every time the application is opened, it asks for the login code and does not use the registered fingerprint. - International transfers cannot be made without an account. - The application does not re…	ar	application suitable alahli bank saudi arabia many problems inside application include limit activate quick login fingerprint every time application open ask login code use register fingerprint international transfer make without account application recognize account number iban transfer another local bank al rajhi bank many service complete even error message describe problem	Negative	App Store	1	1	0
App Store	3afaaed1-b390-49bc-9b07-9fd16ef7837d	modyhsv	9/4/23 11:35	تطبيق سئ جدا من بعد الساعه 12 مافيش تحويل				en	sa	snb-mobile	The application is very bad after 12 o'clock, it doesn't know how to switch off.	ar	application bad oclock doesnt know switch	Negative	App Store	1	1	0
App Store	ccc56cd2-1679-477f-a94a-1df59f12b726	ابو وسام ١١	9/4/23 7:30	يا بنك زباله				en	sa	snb-mobile	The worst and dirtiest bank you can deal with on a daily basis. Problems with transfers and the application constantly crashing for maintenance. The customer service is only available to silence you.	ar	bad dirty bank deal daily basis problems transfer application constantly crash maintenance customer service available silence	Negative	App Store	1	1	1
App Store	1341a50d-2a24-4afd-9b37-ed8a267c1ccd	ashraf.attia	9/3/23 22:38	أحسن موظفين				en	sa	snb-mobile	The employees of Al Ahli Bank are professionals, and it is clear that they work with love and dedication. Thank you, respected management of Al Ahli Bank. ð¹	ar	employees al ahli bank professionals clear work love dedication thank respect management al ahli bank	Positive	App Store	0	0	0
App Store	0b08a99f-b15a-4bd3-a420-b51b5ce30cf6	ksaheh	9/3/23 19:29	507				en	sa	snb-mobile	"I hope that you open a shop in Al Ahli Bank in Egypt, selling recharge cards and digital game cards, such as PlayStation and Steam, etc."	ar	hope open shop al ahli bank egypt sell recharge card digital game card playstation steam etc	Neutral	App Store	0	1	0
App Store	4325e0cb-97db-46c6-a962-5cfb0bede91a	Reem.A.F	9/3/23 19:11	كيف؟!				en	sa	snb-mobile	I don't understand how to make a "log in" with the new update!!	ar	dont understand make log new update	Negative	App Store	0	1	0
App Store	dd136231-c9c9-44f3-a4fa-b747f1131243	نايف الدخيل	9/3/23 12:57	من الي يقيم خمس نجوم ؟؟؟				en	sa	snb-mobile	Simply look at the names of those who give five-star ratings and you will know, Al Ahli Bank, that you are fooling yourselves. User experience is the judge, and real users rate you poorly. Fix your application, which looks like it's from the Windows 95 era, and you will find that real people rate you well, just like Al Rajhi's application.	ar	simply look name give fivestar ratings know al ahli bank fool user experience judge real users rate poorly fix application look like windows era find real people rate well like al rajhis application	Negative	App Store	1	0	0
App Store	edbda05b-ed93-4520-8db8-de35458d459d	Hamad-987	9/3/23 11:19	البرنامج يحتاج تطوير				en	sa	snb-mobile	The system is difficult and complicated.	ar	system difficult complicate	Negative	App Store	1	0	0
App Store	73b0a17c-312f-40f9-a01a-f425e353e7f9	.ksa.99	9/3/23 8:42	خدمة تفويض سيارة خارجي				en	sa	snb-mobile	I request adding an option to rent a car through the application due to the difficulty of reaching the branch in person during weekdays, or extending working hours to have available time slots in the evening from 4 PM to 8 PM.	ar	request add option rent car application due difficulty reach branch person weekdays extend work hours available time slot even pm pm	Neutral	App Store	0	1	0
App Store	e93de51a-914f-4957-8304-6c63dc7a2dd2	rakan7711	9/1/23 4:42	التطبيق لايعمل بالشكل المطلوب				en	sa	snb-mobile	The application does not open at all for me, just logging into it crashes the application. Your support is needed.	ar	application open log crash application support need	Negative	App Store	0	1	0
App Store	ed3d1ad4-aea6-4c41-851d-03f873d8bf14	مهلهل ابني شهر	8/31/23 20:07	خدمة العملاء بالبنك خيال وممتازة ولكن !!!				en	sa	snb-mobile	We hope for the development of the application because it has become the most important tool for every bank, and your application is very, very bad. It needs creative developers. This is not just my personal opinion, but the opinion of many customers.	ar	hope development application become important tool every bank application bad need creative developers personal opinion opinion many customers	Neutral	App Store	1	0	0
App Store	00a93c3d-dfde-432c-8a09-d927b7993e1e	سبحان اللَّـَـَـَـْـْہ	8/31/23 0:50	خلل في التطبيق				en	sa	snb-mobile	Hello, I hope you can help me solve my problem. The application does not open and it immediately takes me out without letting me enter at all.	ar	hello hope help solve problem application open immediately take without let enter	Negative	App Store	0	1	0
App Store	386c6d54-fff4-413d-8eef-0a73fe3887a5	ماجدالفقير	8/28/23 8:30	شهاده لله				en	sa	snb-mobile	I wrote this here because I didn't know how to deliver my message to them. To be honest, it is a reliable and safe bank, and the employees' behavior is very classy. They truly deserve recognition.	ar	write didnt know deliver message honest reliable safe bank employees behavior classy truly deserve recognition	Positive	App Store	1	0	0
App Store	6d27de89-4a63-4ed6-8a5d-d3b256d8013c	الشهري الشهري 2212	8/27/23 0:47	تقييم				en	sa	snb-mobile	The worst, salaries are delayed, and very bad service.	ar	bad salaries delay bad service	Negative	App Store	1	0	1
App Store	8843986c-da38-4ff7-9c4b-f34c187073d1	الوتيد 1	8/27/23 0:43	التطبيق سيئ جداً جداً				en	sa	snb-mobile	The application is bad	ar	application bad	Negative	App Store	1	0	0
App Store	0559c03c-e13f-4c58-9b20-f16876fcc9e9	rooney9985	8/24/23 11:47	مشكله ف فتح البرنامج				en	sa	snb-mobile	I am having a problem with the app not opening.	ar	problem app open	Negative	App Store	0	1	0
App Store	b32b5b75-41d6-4c7e-8dad-82792e1f2939	عمر البلوي ١٤٢٣	8/27/23 0:14	اوصخ بنك يمر عليك بحياتك				en	sa	snb-mobile	Dirty bank.	ar	dirty bank	Negative	App Store	1	0	0
App Store	8d1b7fa0-5bb0-450b-bcb8-084543625292	layan1111111666	8/24/23 13:03	ا				en	sa	snb-mobile	By Allah, this is the worst program that raises your blood pressure abnormally.	ar	allah bad program raise blood pressure abnormally	Negative	App Store	1	0	0
App Store	dd5c8d2d-954b-4b2f-bb7c-c44927de2229	83628h	8/10/23 23:17	تطبيق سيء				en	sa	snb-mobile	The application is honestly frustrating, full of comments and mistakes.	ar	application honestly frustrate full comment mistake	Negative	App Store	1	0	0
App Store	6d6eaa7b-0293-463f-ae8a-440c77fb8cc0	hiiiii jo	8/23/23 8:42	يعلق				en	sa	snb-mobile	There must be an update for the application because it's really bad. Especially when you want to log in, even if you enter the correct code, it tells you there is an error and you have to create a new code. It's really annoying, so please fix your program.	ar	must update application really bad especially want log even enter correct code tell error create new code really annoy please fix program	Negative	App Store	1	1	0
App Store	893889e8-e575-4907-9a06-7687ad8abb24	نبنيخ	8/20/23 17:54	فاشل				en	sa	snb-mobile	The worst raises blood pressure.	ar	bad raise blood pressure	Negative	App Store	1	0	0
App Store	74c546cb-b936-45ca-9a8d-3ba6e10b7750	ميجو ٥٠٧	8/20/23 3:00	ابلاغ عن مشكلة في التطبيق				en	sa	snb-mobile	Please solve the problem of app freezing and improve it further.	ar	please solve problem app freeze improve	Neutral	App Store	0	0	1
App Store	973372b8-78e2-432e-aa1e-c4e0b3546671	ميمونههههه	8/16/23 15:14	تطبيق صعب				en	sa	snb-mobile	The easiest thing we find in banks is getting a bank statement, but your application is always out of coverage and we cannot find a statement.	ar	easy thing find bank get bank statement application always coverage find statement	Negative	App Store	1	1	0
App Store	13394f76-9cff-4348-ada8-494c4b52d2df	Ibralnoory	8/15/23 12:12	الفيزا				en	sa	snb-mobile	It is not possible to add a Visa card to the wallet.	ar	possible add visa card wallet	Negative	App Store	0	1	0
App Store	70aeb56c-e88e-49de-8e2a-248b1865cb21	ahmedAlshmrani	8/14/23 23:06	تقيم				en	sa	snb-mobile	I deal with many applications, including Al Rajhi Bank, Riyadh Bank, and Saudi Investment. By the witness of Allah, the worst application among them is Al Ahli Bank's application. I regret transferring my salary to them.	ar	deal many applications include al rajhi bank riyadh bank saudi investment witness allah bad application among al ahli bank application regret transfer salary	Negative	App Store	1	1	0
App Store	2f51088b-76bf-47f0-bc83-be6657334770	alsnaei	8/14/23 4:23	الاهلي				en	sa	snb-mobile	The application is very bad. I'm trying to create an account and it is not responsive.	ar	application bad im try create account responsive	Negative	App Store	1	1	0
App Store	93d1e17a-857f-4509-b13a-41552f19474e	مستخدم يعاني	8/8/23 11:20	سيء جداً جداً جداً				en	sa	snb-mobile	Every now and then, a comment, every now and then, a very bad breakdown.	ar	every comment every bad breakdown	Negative	App Store	1	0	0
App Store	d2a828dd-4357-4e45-903b-a02ff5d70dcd	ج…	8/10/23 18:52	سيء جداً ولا انصح به				en	sa	snb-mobile	"The application is very bad. Every time I try to do something, it says an error occurred, please try again. How long will this continue? I have been trying to update my data for two months and couldn't because it keeps saying 'Please retry'. And when I call them, no one answers."	ar	application bad every time try something say error occur please try long continue try update data two months couldnt keep say please retry call one answer	Negative	App Store	1	1	0
App Store	6c3a1743-59a8-47f5-8f84-49fd03fa4793	ًًًًشكران	8/2/23 4:13	بنك الاهلي				en	sa	snb-mobile	Thank you â¤ï¸â¤ï¸â¤ï¸â¤ï¸â¤ï¸	ar	thank	Positive	App Store	0	0	0
App Store	a1aff670-43c0-42cc-8646-083f545240c4	Moonsun86	8/7/23 18:12	تطبيق سئ				en	sa	snb-mobile	I am trying to write a password that accepts no more than 8 characters and does not accept symbols, although my password is long and contains symbols.	ar	try write password accept character accept symbols although password long contain symbols	Negative	App Store	0	1	0
App Store	cdd22c27-a1c2-4134-8d9f-6cbd9c98c7a9	ابوسلطان ن	8/5/23 18:57	لا يعمل التطبيق خارج المملكة				en	sa	snb-mobile	Unfortunately, the application does not work outside the Kingdom.	ar	unfortunately application work outside kingdom	Negative	App Store	1	1	0
App Store	3b6f752d-3dc8-4978-86e2-8ff9ac0f149b	ال عنقان	8/5/23 16:14	ما يتاهل ولا نجمه				en	sa	snb-mobile	Very bad and gave her a lot of troubles and the repayment service doesn't work most of the time, and after 12 am until dawn it is out of service!	ar	bad give lot trouble repayment service doesnt work time dawn service	Negative	App Store	1	1	0
App Store	ef51d7a7-a823-4c39-a55d-70ee4a203e31	اللحين	8/3/23 3:50	التحديث معلق !!!!!				en	sa	snb-mobile	Exciting!!!	ar	excite	Positive	App Store	0	0	0
App Store	4683638c-b0ee-4db1-8531-181acfbacf93	abbod21	8/2/23 17:23	تطبيق صار زفت بعد التحديث				en	sa	snb-mobile	The latest app update freezes.	ar	late app update freeze	Negative	App Store	0	0	1
App Store	0f7ccab5-f9c2-4979-b170-6e600df754ef	افيا12	8/1/23 19:18	زفت				en	sa	snb-mobile	They are stupid like them.	ar	stupid like	Negative	App Store	1	0	0
App Store	50b1ec41-ff5b-4df8-ab18-3897650d165b	liolham	7/31/23 0:01	اتمنى تصحيح الاخطاء				en	sa	snb-mobile	The application needs a lot of modifications. It often crashes and is very slow. It also doesn't calculate transfers early enough. It is very poor.	ar	application need lot modifications often crash slow also doesnt calculate transfer early enough poor	Negative	App Store	1	1	1
App Store	655353dc-8591-41a8-bde3-04ddb076b252	ابو حررب	8/1/23 8:07	البرنامج صار بعد اخر تحديث سيء جداً				en	sa	snb-mobile	The program has become very bad after the latest update.	ar	program become bad late update	Negative	App Store	1	0	0
App Store	114d2309-db12-4c5c-abea-9120ec9536c5	Murtadah35	7/31/23 8:34	تطبيق سيئ وغبي جداً				en	sa	snb-mobile	Worst application.	ar	bad application	Negative	App Store	1	0	0
App Store	6c3797f3-62e4-48c3-ab70-1365626673b4	جميلاً 🌹	7/26/23 10:37	مايفتح معلق ماادري ايش المشكله				en	sa	snb-mobile	He was working.	ar	work	Neutral	App Store	0	1	0
App Store	2904125f-fa22-4747-ab48-d9cc0d0aa121	11bhm	7/29/23 22:00	hanouf				en	sa	snb-mobile	The latest update is bad and it keeps me from accessing the application. I deleted it and re-downloaded it many times, but the same problem persists. ð	ar	late update bad keep access application delete redownloaded many time problem persist	Negative	App Store	1	1	0
App Store	b882eeb7-2a01-48c8-9817-fa535b925a8e	abo ahmed95	7/29/23 17:15	👎🏿				en	sa	snb-mobile	The application is fake, it does not record login. I don't like that he is ugly.	ar	application fake record login dont like ugly	Negative	App Store	1	1	0
App Store	cf34924a-c361-4b04-907e-31cd82424cb9	يحيى الساهر	7/29/23 3:01	بعد التحديث الاخير التطبيق يسوي كراش ويطلعك برى البرنامج مايمديك تدخل				en	sa	snb-mobile	After the latest update, the app crashes and kicks you out of the program, so you can't enter.	ar	late update app crash kick program cant enter	Negative	App Store	0	1	0
App Store	84ea45a5-0297-4762-9f94-30276af6b9e7	عمرو ااسيد	7/28/23 13:45	اسوء تطبيق و اسوء خدمه عملاء				en	sa	snb-mobile	How does "I have to turn on Wi-Fi to open the application? Why doesn't it work through data like any other application? Al-Rajhi application opens normally through data."	ar	turn wifi open application doesnt work data like application alrajhi application open normally data	Neutral	App Store	0	1	0
App Store	456e5c93-6a50-4526-9e01-0023d0ec2396	AMAT1441h	7/28/23 9:42	بنك فاشل وسيء				en	sa	snb-mobile	This bank is the worst, its services are slow, the customer service is incompetent and unwilling to work, and their ethics are bad. May God deal with them and may they never succeed. I would rather deal with any other bank than this incompetent one.	ar	bank bad service slow customer service incompetent unwilling work ethics bad may god deal may never succeed would rather deal bank incompetent one	Negative	App Store	1	0	1
App Store	42ca3a11-8c92-402e-af73-b7400185c220	Not Guilty79	7/27/23 2:32	اسوء بنك عرفته البشرية				en	sa	snb-mobile	Difficulty in dealing... The application does not work consistently... On the day of salary deposit, seizure attacks and fainting spells occur, rendering it out of service.	ar	difficulty deal application work consistently day salary deposit seizure attack faint spell occur render service	Negative	App Store	1	1	1
App Store	638e48dc-3922-4eb7-8360-349f54281231	1212(7?79,9),9),	7/27/23 0:17	خرا				en	sa	snb-mobile	I despise the person who developed this cheap program. I transferred an amount of money, but when I entered the application it doesn't show that the amount has been received, even though the money is there and the subscriptions are deducting money. Or maybe I cannot transfer because the amount is not available, meaning the money is stuck in the middle. It's really garbage.	ar	despise person develop cheap program transfer amount money enter application doesnt show amount receive even though money subscriptions deduct money maybe transfer amount available mean money stick middle really garbage	Negative	App Store	1	1	1
App Store	cfccb72b-c0e4-4e55-8f99-88a9f93931b2	majed007007	7/26/23 12:27	التطبيق لايعمل				en	sa	snb-mobile	The application is not working after the latest update.	ar	application work late update	Negative	App Store	0	1	0
App Store	31ad2e19-c366-4cbb-84df-26da1040a558	iM7mDdd	7/26/23 11:45	مشكله بالتطبيق				en	sa	snb-mobile	"The application only works by searching for it in the App Store. Please update it."	ar	application work search app store please update	Neutral	App Store	0	1	0
App Store	2496fa86-ec4e-46c6-a164-1508876eb7f6	Aziiz4419	7/26/23 11:28	يبقى التطبيق سيء				en	sa	snb-mobile	Unfortunately, the bank continues to ignore the customer's problem. Unfortunately, the problem persists with every new update of the application. The application works on some devices and does not work with others (the application crashes with each new update). The significant delay between the bank and the developer in resolving the problem, unfortunately.	ar	unfortunately bank continue ignore customers problem unfortunately problem persist every new update application application work devices work others application crash new update significant delay bank developer resolve problem unfortunately	Negative	App Store	1	0	1
App Store	227f2667-d552-4dae-95c4-e11f30c0927a	jdmaamm	7/25/23 10:11	التطبيق لا يعمل				en	sa	snb-mobile	After the latest update, the application no longer works for me.	ar	late update application long work	Negative	App Store	0	1	0
App Store	802b2e15-8599-468c-886f-e07b579ad5b0	مو شغلك تفهم	7/24/23 21:20	لاحول				en	sa	snb-mobile	Unfortunately, I'm trying to add my card to Apple Wallet, but it's not working. What is this bad luck?	ar	unfortunately im try add card apple wallet work bad luck	Negative	App Store	1	1	0
App Store	dc55bd1b-fff6-4bb4-a067-5bcf3b5852f9	mwf26	7/21/23 13:15	...				en	sa	snb-mobile	The worst bank, I swear, and a very unsuccessful application made by its owner.	ar	bad bank swear unsuccessful application make owner	Negative	App Store	1	0	0
App Store	b262653b-53b6-473e-95d2-9746335eb8a5	Mmff٥	7/20/23 18:01	سيء تحديث مايحدث				en	sa	snb-mobile	What it means is that every time I enter the application, I find that it keeps updating endlessly, I have come to hate entering it. If it wasn't for my salary being deposited there, I would have deleted it and saved myself a headache.	ar	mean every time enter application find keep update endlessly come hate enter wasnt salary deposit would delete save headache	Negative	App Store	1	1	0
App Store	8e6e0721-c24b-48d6-889a-4134e1402556	buzenah	7/20/23 12:17	فاشل				en	sa	snb-mobile	The worst and most inferior application; other banks have surpassed it in technology by stages.	ar	bad inferior application bank surpass technology stag	Negative	App Store	1	0	0
App Store	f44a2392-a62d-4b3f-a860-1b65db0c5889	قديم في البرنامج	7/19/23 17:15	خدمات محدودة جدا				en	sa	snb-mobile	Unfortunately, there are errors in the account statement. It is not possible to obtain a statement for the last three months. The error is repeated with each update.	ar	unfortunately errors account statement possible obtain statement last three months error repeat update	Negative	App Store	0	1	0
App Store	e4764d0a-da05-4b29-a35d-bc1f8630e412	muslim essa	7/18/23 17:03	اضافة طلب استخراج تفويض للسيارة				en	sa	snb-mobile	By God, this is what you are lacking, my brother. It's a shame on you. Others have advanced stages ahead of you. I have to contact the bank and others through a call. I pressed a button, made the authorization, and reached 2023. And you are still in the same place.	ar	god lack brother shame others advance stag ahead contact bank others call press button make authorization reach still place	Negative	App Store	1	0	0
App Store	b6084fcc-d25a-4b8a-90a3-69b8bb76469e	😭💛.	7/19/23 16:52	مشكله				en	sa	snb-mobile	I hope you find a solution to the transfer issue after 12 midnight. I hope you can resolve this problem.	ar	hope find solution transfer issue midnight hope resolve problem	Neutral	App Store	0	1	0
App Store	b88c6e75-346e-417b-b638-a08931a27ce5	Mohammed97611	7/19/23 14:38	تطبيقكم زي وجيهكم				en	sa	snb-mobile	The worst ðð»	ar	bad	Negative	App Store	1	0	0
App Store	b9e47c49-f949-446b-a946-d92bfc8934b0	Eyas11	7/19/23 8:41	لايمكن تفعل جهاز جديد				en	sa	snb-mobile	No matter how hard you try to operate a new device, you won't be able to. When you receive a call, and you press 1, it's as if nothing happens.	ar	matter hard try operate new device wont able receive call press nothing happen	Negative	App Store	0	1	0
App Store	64f42efe-2670-4566-bb7f-c2567b5aac38	b602090	7/19/23 6:50	خروج مفاجي بعد تحديث التطبيق				en	sa	snb-mobile	Is there a solution for the sudden update exit? Because the application has been deleted and the device has been restarted and the problem has not been resolved.	ar	solution sudden update exit application delete device restart problem resolve	Negative	App Store	0	1	0
App Store	c29161cb-38c9-402b-9700-0a9662852b94	Az0000917	7/18/23 22:48	مشكله تقنية				en	sa	snb-mobile	After the latest update, I can't access the program. It kicks me out immediately. I feel like the programmer messed everything up. ðð»	ar	late update cant access program kick immediately feel like programmer mess everything	Negative	App Store	0	1	0
App Store	6d42e633-b784-4356-82cd-e3219e8196e9	Ayasmari	7/6/23 9:41	اضافة خدمة السداد المبكر				en	sa	snb-mobile	I hope to add the option of early repayment or a part of the installment through the application instead of visiting the branch. Most banks are working on this.	ar	hope add option early repayment part installment application instead visit branch bank work	Positive	App Store	0	1	0
App Store	c6a867d6-677c-4d38-bb89-bb8f9e0dcc40	ياليت ططول المقطع الفيديو	7/17/23 9:45	لماذا لم يفتح الطبيق في الجوال				en	sa	snb-mobile	He refused to open his phone with me, why?	ar	refuse open phone	Negative	App Store	0	1	0
App Store	bfc6ee5f-9a1b-4ba6-a2d2-109705d3addb	Ba coy	7/17/23 3:32	Mr				en	sa	snb-mobile	Nandang juandi	su	nandang juandi	Neutral	App Store	1	0	0
App Store	25b5cfbc-5231-4d0f-9621-54031f1ef389	id id wz	7/16/23 10:47	علي				en	sa	snb-mobile	Peace be upon you, I hope to add the service of hiding the balance, thank you all. ð	ar	peace upon hope add service hide balance thank	Positive	App Store	1	0	0
App Store	cdc3a59b-77ad-42b1-a471-22bf4789d886	otmo2	7/14/23 21:14	حابه اقولكم انكم…				en	sa	snb-mobile	The best bank ever â¤ï¸â¤ï¸â¤ï¸â¤ï¸	ar	best bank ever	Positive	App Store	0	0	0
App Store	44b71fa5-70be-4000-8256-dd9e92e2b1fb	nsduuf	7/14/23 14:18	لا يعمل				en	sa	snb-mobile	Does not work ð	ar	work	Negative	App Store	0	1	0
App Store	20d1d2c7-94c4-45eb-8648-e203ceeabd7b	abu nwaaf	7/14/23 12:52	الرجاء تحديث التطبيق				en	sa	snb-mobile	The application has been crashing and cannot be accessed at all since your latest update. Don't you have customer support in the App Store to see how the application works? ð¤¨	ar	application crash access since late update dont customer support app store see application work	Negative	App Store	0	1	0
App Store	7062e253-bea8-4410-8e08-5ceb0d8d6b2d	SalMan AljOmeRI	7/14/23 3:02	البنك الاهلي السعودي				en	sa	snb-mobile	One of the worst banking applications, very primitive and cannot solve any problem even after updates. They should benefit from developers of Al Rajhi and Al Bilad applications, which are much better than the primitive Ahli application.	ar	one bad bank applications primitive solve problem even update benefit developers al rajhi al bilad applications much good primitive ahli application	Negative	App Store	1	0	0
App Store	60ac86f1-7eef-441c-bdbf-d2973633c173	Gha367	7/13/23 23:38	.				en	sa	snb-mobile	Very bad and always late.	ar	bad always late	Negative	App Store	1	0	0
App Store	04e42ac8-4376-4681-bd42-22d7fc52ebd5	kingdom2030	7/12/23 1:37	نقص الخدمات				en	sa	snb-mobile	The application no longer displays your Eoremony transactions as it did in the previous version. It needs to be reviewed and developed to enhance some services in comparison to Al Rajhi Bank's application. There is a clear difference.	ar	application long display eoremony transactions previous version need review develop enhance service comparison al rajhi bank application clear difference	Negative	App Store	1	1	0
App Store	a29d7bae-42a9-42cf-b758-d5d451705e17	Aalooookkaalyii	7/11/23 3:14	سيء				en	sa	snb-mobile	The application is bad, bad, bad. It is always under maintenance and stays down for two or more days, which is normal.	ar	application bad bad bad always maintenance stay two days normal	Negative	App Store	1	0	0
App Store	1db8f9e6-2970-41d6-8604-1cbac9c4f2b1	RubaLoey	7/7/23 20:30	ما يشتغل				en	sa	snb-mobile	The bank that annoys me the most in my life is making me consider closing my account permanently. The app is really bad; every time I try to use it, some strange problem comes up, as if it's from another era.	ar	bank annoy life make consider close account permanently app really bad every time try use strange problem come another era	Negative	App Store	1	0	0
App Store	66a494cd-23e3-4fac-8877-f5a78dd3a885	rgd799	7/7/23 14:56	خطأ في تحديث البيانات				en	sa	snb-mobile	The application has a problem. Every time I update my data, an error occurs. Please solve this problem.	ar	application problem every time update data error occur please solve problem	Negative	App Store	0	1	0
App Store	df6c22a4-fe61-4879-984c-e1c72ae92ecd	البنك الأهلي التعبان	7/5/23 19:36	تطبيق فاشل جداً				en	sa	snb-mobile	By God, the application is the worst and does not serve, and I cannot recover your account or contact them, they do not respond.	ar	god application bad serve recover account contact respond	Negative	App Store	1	1	0
App Store	eb23cc54-9a2d-45a2-8b97-41ce1e51ecfc	HAITHAM LABIB135	7/4/23 14:34	لايعمل خارج المملكة				en	sa	snb-mobile	The application does not work in some Arab countries, such as Egypt.	ar	application work arab countries egypt	Negative	App Store	0	1	0
App Store	fd044bc9-e6ee-472c-93ea-d7d3f9647733	ماعندهم سالفة	7/4/23 12:38	I can't even access my account				en	sa	snb-mobile	I set a secret code for quick access, but it always tells me "something went wrong." Sometimes I am at the cashier and need quick access to the application, and I am surprised to find that it tells me the same error.	ar	set secret code quick access always tell something go wrong sometimes cashier need quick access application surprise find tell error	Negative	App Store	0	1	0
App Store	420ae0a6-62bc-485e-a0fb-241b4f62300b	wld_	7/3/23 6:37	سيئ				en	sa	snb-mobile	Learn from the second banksð Is it possible that there is no worse than you?	ar	learn second bank possible bad	Negative	App Store	1	0	0
App Store	b3d93c61-93b9-46ab-a3e4-e79e51d1b931	mo.baz	6/30/23 3:25	سيئ جدا				en	sa	snb-mobile	"I know that whoever evolves becomes better and moves forward, not backward. Honestly, there is a great disappointment, not only in the application but also in the entire bank. The services have become very bad, there is poor response and in addition, the complexity of the services is abnormal. Where are we heading?!"	ar	know whoever evolve become good move forward backward honestly great disappointment application also entire bank service become bad poor response addition complexity service abnormal head	Negative	App Store	1	0	0
App Store	2ab04d4b-3961-48ca-8ad7-8a5c79d411fb	هارلد	6/27/23 15:33	الاهلي السيء الى الاهلي الاكثر من سيء				en	sa	snb-mobile	The worst application that gets banned all the time, and all the reviews are in English, and the bank is Saudi, they're lying, a totally failed bank.	ar	bad application get ban time review english bank saudi theyre lie totally fail bank	Negative	App Store	1	0	0
App Store	9dc979d8-4d02-4115-8ede-7c1cfeb4c576	787858Hishamm	6/27/23 4:12	خطاء				en	sa	snb-mobile	The application is full of errors and has very bad lagging. I hope you find a solution to the commenting issue, where there are no bill payments or transfers!	ar	application full errors bad lag hope find solution comment issue bill payments transfer	Negative	App Store	1	1	1
App Store	88cc39d6-d8a2-400f-9f66-3cb8586d576c	marwan.12	6/26/23 17:05	فاشل				en	sa	snb-mobile	An application that lives in the Middle Ages, full of problems with a poor user interface and a worse user experience	ar	application live middle age full problems poor user interface bad user experience	Negative	App Store	1	0	0
App Store	8cd21d03-3db2-4e93-92ed-572bf4486e52	Dr-karam	6/25/23 22:52	App wallet				en	sa	snb-mobile	All customers are complaining about adding the card to the app wallet. For me, today is the tenth day but I can't add it to the wallet. I even contacted customer care on Twitter and they replied to me with this message: Peace be upon you and God's mercy and blessings ð¹ Don't worry, it's no problem. You can add the card to the Apple Wallet through the Ahli Mobile app: 1. Choose the account 2. D…	ar	customers complain add card app wallet today tenth day cant add wallet even contact customer care twitter reply message peace upon gods mercy blessings dont worry problem add card apple wallet ahli mobile app choose account debit card select card add apple wallet still problem persist add card wallet except card	Negative	App Store	0	1	0
App Store	8e12e124-1b2b-4857-8839-707d5ce086b0	redbluewhite55	6/25/23 11:56	👎				en	sa	snb-mobile	He has been not working with me for three months???? Find a solution and fix your application.	ar	work three months find solution fix application	Negative	App Store	0	1	0
App Store	39200008-21ba-49fb-b51f-ebd86a747763	شكراااا لممننمممن من ودعتت	6/25/23 0:58	؟؟				en	sa	snb-mobile	If the salary comes on time, it does not come early, nor does it open.	ar	salary come time come early open	Neutral	App Store	1	0	0
App Store	6ccbe253-6f7e-4feb-91f5-7b7af7a8300b	ام /حسين	6/24/23 5:43	الالي طفشني يردد خطأ وانا اقل من نفس البطاقة				en	sa	snb-mobile	I couldn't log into my account.	ar	couldnt log account	Neutral	App Store	0	1	0
App Store	fa55955e-88e1-4631-972e-442fdbee96a6	علي مكين	6/23/23 12:40	مشكلت تسجيل الدخول لتطبيق الاهلي موبايل				en	sa	snb-mobile	I suffer a lot from login problem and password malfunction, even though I am 100% sure it is correct. However, it shows "login disabled" or an error message. We hope you try again later. Neither the banking phone nor the application work. I am forced to go to ATMs to transfer or pay fees, or anything else. Please solve this problem. One of the most difficult applications is AlAhli Mobile App, unl…	ar	suffer lot login problem password malfunction even though sure correct however show login disable error message hope try late neither bank phone application work force go atms transfer pay fee anything else please solve problem one difficult applications alahli mobile app unlike bank applications especially alrajhi easy smooth use	Negative	App Store	0	1	0
App Store	35c4852a-6198-4933-b892-9ff25d43e000	MHD_NJ	6/20/23 12:50	ياتشتغلو زين ولا قفلوه				en	sa	snb-mobile	The application is very bad. I have 3 accounts, but when I enter, I can only find one and the rest are deleted. It can't perform all your transactions between accounts using the banking phone. ððð	ar	application bad account enter find one rest delete cant perform transactions account use bank phone	Negative	App Store	1	1	0
App Store	92e3f613-b7be-4674-8f14-be219f8275d5	علي بن ال بليه	6/18/23 19:29	عدم الدخول للتطبيق				en	sa	snb-mobile	Very bad service	ar	bad service	Negative	App Store	1	0	0
App Store	02c879de-c167-4059-9629-2c28f396cdb0	RU771	6/18/23 10:49	اسوء بنك على مر التاريخ				en	sa	snb-mobile	All the bank services are bad.	ar	bank service bad	Negative	App Store	1	0	0
App Store	7d6b1cb3-0d0d-49de-9ab9-28d7fe76cff6	مرعي المراعنه	6/15/23 13:45	سيى لا تتوفر بعض الخدمات				en	sa	snb-mobile	Some services are not available	ps	service available	Negative	App Store	0	1	0
App Store	29f3d433-86f4-4e45-a8c0-5efd77c57f94	Moshishz uuduh	6/14/23 20:59	ت				en	sa	snb-mobile	Very bad application, I hope you solve the login problem.	ar	bad application hope solve login problem	Negative	App Store	1	1	0
App Store	cc570eed-1f07-4e70-a626-74ad40032f9a	عيسى -	6/14/23 16:28	الاهلي				en	sa	snb-mobile	I pass by a narrow alley and a narrow application that is a burden, exhausting, and raises the blood pressure. There are no available services. Hand me Al Rajhi Bank, if there were a thousand stars, I would give it.	ar	pass narrow alley narrow application burden exhaust raise blood pressure available service hand al rajhi bank thousand star would give	Negative	App Store	1	0	0
App Store	be3c2d8c-f8c1-495a-8ed4-931f6ab36d81	حليمه العمري	6/13/23 12:03	H				en	sa	snb-mobile	I can't add the card to Apple Pay.	ar	cant add card apple pay	Neutral	App Store	0	1	0
App Store	9474d538-604b-4318-8773-75cbf7dc0a6e	Shodkook	6/11/23 20:10	عدلو برنامجكم التعبان				en	sa	snb-mobile	For over two months, may Allah take revenge on you and your miserable Ahli application. It refuses to authenticate my devices, whether new or old. The automated call is useless and I can't do anything. I can't withdraw, work, or do anything. I have to pay through the network, and the card is not added to the e-wallet. I contacted Ahli bank on Twitter, and they said they would look into my problem…	ar	two months may allah take revenge miserable ahli application refuse authenticate devices whether new old automate call useless cant anything cant withdraw work anything pay network card add ewallet contact ahli bank twitter say would look problem ignore also send email ramadan one respond customer service terrible application horrible never update application disaster update phone think might iss…	Negative	App Store	1	1	0
App Store	d87fdf84-ef9a-4558-bb03-2be389afc64d	Zozo is your Angel	6/4/23 6:14	مشكله في التطبيق				en	sa	snb-mobile	Every time there seems to be a problem and it asks for re-entry later. Those who have an important transaction at the bank have to wait for how long! I have been experiencing this for a while now, whenever I enter the application and try to perform a transaction, it tells me that the service is unavailable. This is not something I am accustomed to from Al Ahli Bank, so I hope the problem is resol…	ar	every time seem problem ask reentry late important transaction bank wait long experience whenever enter application try perform transaction tell service unavailable something accustom al ahli bank hope problem resolve otherwise many customers close account transfer another bank since even basic service available rest service	Negative	App Store	1	1	0
App Store	9553c7e2-b35a-4b0e-8421-d874a7d12c1f	ABdullah295	6/11/23 19:28	برنامج فاشل				en	sa	snb-mobile	Failed and unresponsive and hangs.	ar	fail unresponsive hang	Negative	App Store	0	1	1
App Store	103db3e9-af94-4b1b-b0f2-10f6aacdaa95	ابن معلي	6/11/23 12:54	البرنامج				en	sa	snb-mobile	The worst who bursts 66 livers.	ar	bad burst livers	Negative	App Store	1	0	0
App Store	c62f20e5-d1d2-429c-9170-1a48636071a1	moe6484	6/9/23 23:59	خدمه سيئه				en	sa	snb-mobile	The program, 90% of the time, experiences a very poor service. It is the largest bank, but its services are very bad.	ar	program time experience poor service large bank service bad	Negative	App Store	1	0	0
App Store	1bd9885b-498e-4702-aec2-59b01a3e3c43	V I ЯR U S	6/9/23 12:50	تطبيق سيء				en	sa	snb-mobile	Very bad application. The bank is requesting an account update through the application, but the update options are not complete within the application. the worst bank for their lack of care.	ar	bad application bank request account update application update options complete within application bad bank lack care	Negative	App Store	1	1	0
App Store	d7e36c17-dedf-4257-8fdc-ea87aee53c1f	Snap: U-97	6/8/23 22:24	زي الزق				en	sa	snb-mobile	Thieves	ar	thieve	Negative	App Store	0	0	0
App Store	1565c24e-32a1-446b-81f3-be9ae5104f05	makelaljw	6/7/23 10:53	التطبيق طول الوقت عطلان ومشاكل حتى البنك برضو من بعد الاندماج				en	sa	snb-mobile	There is nothing else that I know of, I no longer have any dealings with this bank.	ar	nothing else know long dealings bank	Negative	App Store	1	0	0
App Store	80aba803-59d7-42a1-bb2b-77e2a9f17e25	sEn |	6/5/23 21:00	تطبيق سيء				en	sa	snb-mobile	If there were less than a star, I would give you the very bad application.	ar	less star would give bad application	Negative	App Store	1	0	0
App Store	c65d42b3-78c7-4931-b026-a1775e09a49a	🐠م مارك	6/5/23 17:53	تعبان				en	sa	snb-mobile	The program is lousy and the service is lousy.	ar	program lousy service lousy	Negative	App Store	1	0	0
App Store	830c4b2d-3448-481c-990c-5b022610ba70	KSA_2018iiiii	6/3/23 13:15	برنامج فاااااااشل				en	sa	snb-mobile	the worst program ððððð	ar	bad program	Negative	App Store	1	0	0
App Store	17ca364c-06dc-46bf-ba45-20da1a5ce1aa	🇸🇩🇲🇲	6/3/23 12:18	سيء جدا				en	sa	snb-mobile	Unnatural racism in the branch, and they are extremely bad in an abnormal way. The implementation is even worse.	ar	unnatural racism branch extremely bad abnormal way implementation even bad	Negative	App Store	1	0	0
App Store	68900b58-d803-46a9-8fd4-0f41abdb5b41	hsgskski	6/3/23 10:31	.				en	sa	snb-mobile	I swear by God, it is the worst bank that owns an application that crashes heavily and does not open most of the time. I seek forgiveness from Allah, but (it's frustrating).	ar	swear god bad bank own application crash heavily open time seek forgiveness allah frustrate	Negative	App Store	1	1	1
App Store	186bcb7d-b39a-4012-b526-bfa7ff4e78e4	فتووووووووووووووون	6/3/23 0:56	استفسار				en	sa	snb-mobile	Why isn't the application installing on my phone? I need to go to the store and search for it.	ar	isnt application instal phone need go store search	Negative	App Store	0	1	0
App Store	e8bef6ca-d1e1-4ced-b80a-814e88eab0ad	IISHAHZ	6/1/23 9:31	تطبيق فاشل				en	sa	snb-mobile	The worst application Around the month of August, I tried to transfer money and it didn't go through. Instead, I received a message saying to try again later.	ar	bad application around month august try transfer money didnt go instead receive message say try late	Negative	App Store	1	1	0
App Store	d67246b6-802a-43bc-a05c-83d3d48fd9a4	ماجد سالم القحطاني	6/1/23 7:44	🤮🤮				en	sa	snb-mobile	"Extremely bad" or "terrible."	ar	extremely bad terrible	Negative	App Store	1	0	0
App Store	dca7e99d-a4d8-4a07-9207-ef56b84d04b3	Ali hassan salah	6/1/23 0:45	الرجاء اصلاح الاخطاء				en	sa	snb-mobile	Comment in the app: If someone transfers money to me, it doesn't reflect immediately in my balance. Sometimes, I have to wait for a whole day to transfer because the balance is insufficient, even though I have money in my account.	ar	comment app someone transfer money doesnt reflect immediately balance sometimes wait whole day transfer balance insufficient even though money account	Negative	App Store	0	1	0
App Store	2583ae8f-94cf-4339-ba1f-e8b3954b0e6a	Great world learn every things	5/31/23 18:30	لا يعمل				en	sa	snb-mobile	The application has been running for a long time and it is not working on my device!??	ar	application run long time work device	Negative	App Store	0	1	0
App Store	ba06db2f-4fe6-48c6-b260-8222d3873e3d	majid19777	5/31/23 9:10	سئ جدا طول اغلب الوقت صيانةً				en	sa	snb-mobile	The old version was excellent. I don't know why you are updating it to make the application worse!! It is very dysfunctional and we have banking transactions that I am unable to do anything with !!!	ar	old version excellent dont know update make application bad dysfunctional bank transactions unable anything	Negative	App Store	1	1	0
App Store	b94b06b0-8508-48f7-8fd7-906b4b93a565	اميدوس	5/30/23 5:15	مستاء جدا				en	sa	snb-mobile	Unfortunately, a big bank like Al Ahli and its application are like this! It keeps malfunctioning all the time!	ar	unfortunately big bank like al ahli application like keep malfunction time	Negative	App Store	1	1	0
App Store	035577a3-f1d4-4b11-a719-6d7e90dd22c4	ابو قلبي خالد	5/29/23 9:55	التطبيق حملته لكن معي يفتح علي جوالي				en	sa	snb-mobile	It does not open.	ar	open	Neutral	App Store	0	1	0
App Store	37fcb253-baf8-4a59-b354-7f64fbd47575	عميل5441818	5/30/23 2:41	عميل				en	sa	snb-mobile	The application with the new updates does not pay bills or transfer money. I hope the problem gets fixed.	ar	application new update pay bill transfer money hope problem get fix	Negative	App Store	0	1	0
App Store	833ebd63-672f-481c-80e8-11a4d847ebe7	Reahhdhf	5/30/23 1:06	سيء جدا لا يعمل تطبيق معي				en	sa	snb-mobile	A very bad application that does not work and does not open for me.	ar	bad application work open	Negative	App Store	1	1	0
App Store	88e324c1-2241-4720-a797-7fc7cb0ad23d	Modywest	5/29/23 13:43	خلاص				en	sa	snb-mobile	Every week, we are updating the "Gharftona" application.	ar	every week update gharftona application	Neutral	App Store	0	1	0
App Store	d5e55c18-c44c-472f-b9ef-6a8bc38da7cd	dooly200	5/29/23 11:04	التطبيق لايعمل من كذا يوم				en	sa	snb-mobile	The application has not been working for several days.	ar	application work several days	Negative	App Store	0	1	0
App Store	29c8a9e0-bc78-4378-82e1-3b2d4b796eb9	ابو العزيزن الا	5/29/23 10:06	تطبيق فاشل				en	sa	snb-mobile	The application "Zbala" in all its intended meanings.	ar	application zbala intend meanings	Neutral	App Store	1	0	0
App Store	5633c2e5-afb8-454d-8aed-fbf3fd5427a1	layla15460	5/24/23 22:29	جميل جدا جدا				en	sa	snb-mobile	Greatness, greatness.	ar	greatness greatness	Positive	App Store	0	0	0
App Store	4058600e-82fa-4ca5-9eca-d909a9a955a4	منتاااازز	5/28/23 15:40	تطبيق فاشل				en	sa	snb-mobile	Al Ahli Bank will remain with millions of customers and billions in profits, but there isn't a single person among them who knows how to create an application. Every day there is a problem, a malfunction, a lack of manners, and a delay. May God take care of you in this life and the hereafter.	ar	al ahli bank remain millions customers billions profit isnt single person among know create application every day problem malfunction lack manners delay may god take care life hereafter	Negative	App Store	1	1	1
App Store	b4de5644-1d3f-4950-8b50-8c5ecac8cfdf	طالع العتيبي	5/28/23 9:50	سي جدا جدا				en	sa	snb-mobile	Peace be upon you, brother. We are really tired of this application. Every now and then, there is an update and some new system to learn. The current update is very complicated. We want to pay the dues that we owe, but there is no option for payment with every update comes a new issue. Please find a solution for us.	ar	peace upon brother really tire application every update new system learn current update complicate want pay dues owe option payment every update come new issue please find solution us	Negative	App Store	1	1	0
App Store	8c8b20db-b582-4f5b-bcb5-dcf7be9e765d	D7om188	5/28/23 9:33	تحديث سيء جداً				en	sa	snb-mobile	Very bad update doesn't help in paying bills, government services, or university tuition. The technical support doesn't respond to you, you can say Apple Cash is like Al-Ahli Bank on a downhill road. ð¡	ar	bad update doesnt help pay bill government service university tuition technical support doesnt respond say apple cash like alahli bank downhill road	Negative	App Store	1	1	0
App Store	889c3c9b-392b-4e43-8e8d-1db526a8e4c7	Smoal3z	5/28/23 9:08	ولازال التطبيق يحتاج الى تطوير اكثر				en	sa	snb-mobile	After maintenance, the bill payment box disappeared!!!!	ar	maintenance bill payment box disappear	Neutral	App Store	0	1	0
App Store	e7aed4e0-30e5-4c42-887e-c8b279f1536b	زارا١٢٢	5/28/23 0:47	لكل تحديث اسوأ من السابق				en	sa	snb-mobile	Unfortunately, every two weeks there is an update and each update is worse than the previous one. If you deal with technicians from other banks, it would be better.	ar	unfortunately every two weeks update update bad previous one deal technicians bank would good	Negative	App Store	1	0	0
App Store	b1ce1e16-62b8-403f-9df4-87eb3ac0bfe0	هتون 2066	5/27/23 9:22	تطبيق فاااااشل				en	sa	snb-mobile	the worst Application the worst application in every sense of the word. Every time I enter the application to make a transaction, an error occurs. I try again, and the same problem persists. No improvement or fixing of the issues in the application. I hope for improvement and correction of the existing errors in the application.	ar	bad application bad application every sense word every time enter application make transaction error occur try problem persist improvement fix issue application hope improvement correction exist errors application	Negative	App Store	1	1	0
App Store	498703eb-daad-43fb-8867-9b437bda2ddc	ash74400000000	5/25/23 23:32	تحتاجوا تجددوا موظفين الدعم الفني				en	sa	snb-mobile	Your application is very weak. Find out who is responsible for the Rajhi application and hire them at your company. The Rajhi application is excellent.	ar	application weak find responsible rajhi application hire company rajhi application excellent	Negative	App Store	1	0	0
App Store	8533b470-b902-45fc-b351-b63f2f4319ad	su.1996	5/25/23 20:05	التحديث الجديد				en	sa	snb-mobile	The new update is like garbage, and the app just keeps freezing :)	ar	new update like garbage app keep freeze	Negative	App Store	1	0	1
App Store	ca09698d-c272-4518-b8c3-334b0c248663	king asm	5/25/23 20:03	H				en	sa	snb-mobile	Enough, stop updating and changing the appearance of the application all the time. The last update had a nicer and simpler look.	ar	enough stop update change appearance application time last update nice simple look	Negative	App Store	1	1	0
App Store	543624a4-6935-4d3c-9ee9-008de4bb3f3d	Abdulla213	5/25/23 18:02	سيء سيء سيء				en	sa	snb-mobile	Worst banking application.	ar	bad bank application	Negative	App Store	1	0	0
App Store	607d243f-a855-4e7b-9700-f0832224781c	jgrkhg2020	5/25/23 12:21	التطبيق سيء له اسبوع معلق				en	sa	snb-mobile	The application is bad, it has been frozen for a week.	ar	application bad freeze week	Negative	App Store	1	0	1
App Store	d4b78080-e02b-44b0-98d3-82f6dae8cd5a	ghannsm	5/24/23 8:24	عطل التطبيق				en	sa	snb-mobile	What do you want to fix in the application?!	ar	want fix application	Neutral	App Store	0	1	0
App Store	80e404f1-df9c-4844-9d94-bb4ce16524c8	رأس كعبول	5/24/23 4:12	من افشل البنوك				en	sa	snb-mobile	"And the reason is that my wallet is always empty."	ar	reason wallet always empty	Negative	App Store	1	1	0
App Store	28b11122-2d37-4ca9-b415-d4910f170787	علي ابو ريم	5/24/23 4:00	لا استطيع التحويل من حسابي الى حساب اخر				en	sa	snb-mobile	When I open the transfer option, an option to open an additional account appears, but I don't want to open an account, I only want to transfer!	ar	open transfer option option open additional account appear dont want open account want transfer	Negative	App Store	0	1	0
App Store	18244052-3828-4140-9dc0-1eeada916b56	‏سلطان العبد الهادي	5/15/23 14:36	‏أتمنى أن يتم اضافة خاصية التحويل عن طريق مسح الباركود الموجود في البطاقة				en	sa	snb-mobile	I hope that the feature of transferring by scanning the barcode on the card is added to the input point in the end.	ar	hope feature transfer scan barcode card add input point end	Neutral	App Store	0	1	0
App Store	62943a24-5358-4caa-9776-d942e835f4cc	ابوممدرح	5/23/23 23:36	تطبيق معقد جدا				en	sa	snb-mobile	The application is very annoying, I couldn't update it, I hate dealing with you, Zain Al Rajhi is easy with his customers, unlike you complicated people, even with an update.	ar	application annoy couldnt update hate deal zain al rajhi easy customers unlike complicate people even update	Negative	App Store	1	1	0
App Store	4124b053-c3dd-46e0-82bf-b75562f7bd63	بنطهيف	5/23/23 19:50	مشاكل تسجيل على الطبيق				en	sa	snb-mobile	I have login problems on my iPhone. It says "This device is not registered." When I try to connect, it says "error."	ar	login problems iphone say device register try connect say error	Negative	App Store	0	1	0
App Store	1f9b3817-2550-4657-8420-666bbb8b5bf3	ابوعبدالله ١٥٠١٣٠	5/23/23 19:03	تعبتونا				en	sa	snb-mobile	Why does the update happen every month?	ar	update happen every month	Negative	App Store	0	1	0
App Store	cb9bd041-240d-4e3a-9b95-a15ecfca9471	PTG Abdullah	5/23/23 17:12	سيء				en	sa	snb-mobile	Bad application, same as all bank services.	ar	bad application bank service	Negative	App Store	1	0	0
App Store	f429a91a-ce78-460a-a2af-a8f0871c5c71	ابو فيصل وليد الذروي	5/23/23 12:04	عملاء الوسام				en	sa	snb-mobile	The appearance of the program for Al-Wasam clients is no different from that of regular clients, unlike other banking applications. Greetings.	ar	appearance program alwasam clients different regular clients unlike bank applications greetings	Neutral	App Store	0	1	0
App Store	b6c0d783-82cd-405e-b9ca-0804359555a5	moha76665	5/23/23 6:04	اسوء تطبيق لبنك في التاريخ البشري				en	sa	snb-mobile	Enough, have mercy on us with all these updates every day!!	ar	enough mercy us update every day	Negative	App Store	1	0	0
App Store	8b648adf-fe2f-4ccb-bae7-05afe2c21eaf	ع علاء	5/22/23 19:07	اقوى رأس مال في الشرق الأوسط ، وأسوأ خدمات الكترونية				en	sa	snb-mobile	The strongest capital in the Middle East, and the worst electronic services.	ar	strong capital middle east bad electronic service	Negative	App Store	1	0	0
App Store	e9cdf535-23ec-47f1-bc49-d6e35d3ddee7	xxxRitoxxx1	5/21/23 13:07	التطبيق مايشتغل iPhone 6 Plus				en	sa	snb-mobile	The application does not work on iOS 12.5.7.	ar	application work ios	Negative	App Store	0	1	0
App Store	8525caa3-faec-4a32-9943-c7f22555b7e2	ibrahim.990	5/20/23 20:47	افشل بنك				en	sa	snb-mobile	By Allah, the most unsuccessful bank throughout history. No application, no branches, and no services. Learn from Al Rajhi and Al Riyadh.	ar	allah unsuccessful bank throughout history application branch service learn al rajhi al riyadh	Negative	App Store	1	0	0
App Store	3d6dbda8-7d79-461e-9f08-cf80e13d9065	Yedali85	5/20/23 16:41	اعتراض على الاصدار الجديد				en	sa	snb-mobile	This application is designed for a specific category and does not consider all categories. My iPhone is old and the previous version was working on it. Since the new update, I have not been able to use it because it requires a new device and a higher operating system. I will not throw away my phone for the sake of an application.	ar	application design specific category consider categories iphone old previous version work since new update able use require new device high operate system throw away phone sake application	Negative	App Store	1	1	0
App Store	bb08309c-a73e-4534-9f1e-6977823d555b	zxasqw.1422	5/18/23 14:50	زق				en	sa	snb-mobile	Development - the world and programs are evolving. With this new update, we are going back to 2012.	ar	development world program evolve new update go back	Neutral	App Store	1	0	0
App Store	abf70ada-5032-4ee3-aae5-0548d92f58e8	احم9933د	5/17/23 21:00	اخس تطبيق واخس بنك				en	sa	snb-mobile	The competing banks reached the moon, and you still have an application that is worse than it.	ar	compete bank reach moon still application bad	Negative	App Store	1	0	0
App Store	e8413d93-d930-492c-889a-0da8a86b9ad9	NAZ098765432468	5/16/23 6:50	التطبيق لايعمل				en	sa	snb-mobile	The program does not work on iPhone version 14.	ar	program work iphone version	Negative	App Store	0	1	0
App Store	4775d477-b92c-4f5f-bb20-7e9213103b49	ashwaqit	5/16/23 6:31	التطبيق مايفتح				en	sa	snb-mobile	The application has been not opening for a few days, it's bothering us. ð¤	ar	application open days bother us	Negative	App Store	1	1	0
App Store	02c06b6b-4a99-4c5e-a162-e98a39690c46	حذفت اللعبة👍	5/15/23 21:12	تعبان				en	sa	snb-mobile	The program is bad and it's been stuck for 24 hours, I can't open my account because it says "load error".	ar	program bad stick hours cant open account say load error	Negative	App Store	1	1	1
App Store	d61fc25c-88a3-4101-a31d-e2c379dcf8b8	klklk.l	5/15/23 18:39	👎🏻👎🏻😕				en	sa	snb-mobile	The bank that has the most delays in transactions is this bank, and unfortunately, this problem is very old and hasn't been resolved. It's unbelievable that a bank of this size can't solve these problems. ðð»	ar	bank delay transactions bank unfortunately problem old hasnt resolve unbelievable bank size cant solve problems	Negative	App Store	1	1	1
App Store	acb9d8fe-031e-4f17-ab97-49d9a2f008a9	Y1407	5/15/23 15:57	نرجو حل مشكلة				en	sa	snb-mobile	I cannot add the debit card to the wallet.	ar	add debit card wallet	Neutral	App Store	0	1	0
App Store	b963fcd3-92e1-48cc-a577-fad59ea00893	دلبيانا	5/15/23 6:11	خلل في التطبيق				en	sa	snb-mobile	Unfortunately, every time we try to enter, it either kicks us out of the page or asks us to refresh and enter another page. It's been a week and I want to enter the application to complete my tasks but I can't, so I have to go to the ATM, which is very bad.	ar	unfortunately every time try enter either kick us page ask us refresh enter another page week want enter application complete task cant go atm bad	Negative	App Store	1	1	0
App Store	1918e4d5-972f-4afc-b66d-b9020063ed42	محمد حكواتي	5/14/23 14:21	رافض يفتح التطبيق لح اكثر من يومين				en	sa	snb-mobile	It is not opening.	ar	open	Neutral	App Store	0	1	0
App Store	f8e95907-15bc-4ef4-bde7-8753d74e0052	Mbking99	5/15/23 4:50	أنتظر ردكم				en	sa	snb-mobile	The application is frozen, and I can't update my personal information. I asked you on Twitter for your response, "Delete and download the application again and try again." I deleted it and downloaded it more than once, but nothing has changed. If you don't know the solution, what should we do? Now my account is frozen, and I can't do anything. I'm waiting for your response.	ar	application freeze cant update personal information ask twitter response delete download application try delete download nothing change dont know solution account freeze cant anything im wait response	Negative	App Store	0	1	1
App Store	6414d821-7b71-4126-962a-6344674e838f	تحلفاكجرز	5/14/23 17:02	مايفتح معي التطبيق				en	sa	snb-mobile	Every time I open the program, it closes quickly.	ar	every time open program close quickly	Neutral	App Store	0	1	0
App Store	91118e9f-08e7-4651-8d99-69ea4d3ae6ea	الشاشه الرياسيه	5/13/23 21:58	الشاشه الرئاسيه				en	sa	snb-mobile	The main screen	ar	main screen	Neutral	App Store	0	1	0
App Store	60c134ce-66a5-420a-8089-02c3a0731964	nancy salih	5/14/23 8:28	التطبيق سي جدا				en	sa	snb-mobile	The application is the worst, it works for one day and then crashes for a week. Honestly, Al Ahli bank's service has become very decline. ðð»	ar	application bad work one day crash week honestly al ahli bank service become decline	Negative	App Store	1	1	0
App Store	863ace22-8635-4a94-ab9d-47f64650305d	الاهلي زفت	5/11/23 13:32	تطبيق فاشل				en	sa	snb-mobile	The application is very unsuccessful, it keeps giving me errors every now and then, saying that I cannot log in or I have to log in from the store and then enter the application. Fix it and learn from Al Rajhi Bank and do something good. May God bless your mothers.	ar	application unsuccessful keep give errors every say log log store enter application fix learn al rajhi bank something good may god bless mother	Negative	App Store	1	1	1
App Store	45c63c6e-5959-4bf8-bc0b-cf18ac8471c3	هناي سيف	5/11/23 10:49	البرنامج خربان				en	sa	snb-mobile	The program is not working for me, it does not open.	ar	program work open	Negative	App Store	0	1	0
App Store	43c30247-52c2-4625-8075-fefa71937097	mh.177	5/10/23 19:27	التطبيق ما يشتغل				en	sa	snb-mobile	"The worst bank in Saudi Arabia, I advise everyone to change their bank and relax. The application has been malfunctioning for a week."	ar	bad bank saudi arabia advise everyone change bank relax application malfunction week	Negative	App Store	1	1	0
App Store	89897262-09c1-4618-8727-2375bd5b5517	أبي حل	5/10/23 18:56	جدة				en	sa	snb-mobile	The application doesn't open. I deleted it and then reinstalled it, but it still logs me out of the application?!	ar	application doesnt open delete reinstall still log application	Negative	App Store	0	1	0
App Store	4480f985-012f-464f-9763-b852366a5c8b	abady085	5/10/23 0:23	ليش التطبيق ما يفتح عندي				en	sa	snb-mobile	"I hope you can find a solution for me!!! I have been waiting for a reply for over a week and the application is still closed for me. What is the reason?"	ar	hope find solution wait reply week application still close reason	Negative	App Store	0	1	0
App Store	46fd3bce-4c30-4d46-a036-f875f11e0ab5	أبو عبدالله٦٢٨	5/9/23 22:07	احقر بنك				en	sa	snb-mobile	The worst application and dirtiest bank. They have no customer service and if you approach them for a loan or anything, they charge you extremely high fees. On top of that, they insult you and don't treat you well. Their services are bad in every aspect, and I don't recommend anyone to deal with them. I hope you take my words seriously. There are other banks out there, like Al Rajhi, whose profit…	ar	bad application dirty bank customer service approach loan anything charge extremely high fee top insult dont treat well service bad every aspect dont recommend anyone deal hope take word seriously bank like al rajhi whose profit low	Negative	App Store	1	0	0
App Store	1109eaf0-12d2-4268-b1ae-f2f78c5e3110	eimq333	5/9/23 20:18	👎🏻👎🏻👎🏻				en	sa	snb-mobile	Much worse than bad.	ar	much bad bad	Negative	App Store	1	0	0
App Store	65abfd02-da2e-4b7b-a22f-d4d69ed7310c	Amoooooly	5/9/23 11:30	لا يفتح				en	sa	snb-mobile	The application is bad and needs an update. It does not fully open, and when I enter the application, it immediately kicks me out.	ar	application bad need update fully open enter application immediately kick	Negative	App Store	1	1	0
App Store	a380cfa6-c0bc-418f-a5ed-71e541343789	omob797	5/9/23 10:05	يعلق التحديث الاخير				en	sa	snb-mobile	Ever since the latest update was released, the program has stopped working completely for me. Every time I try to run it, the application crashes and shuts down immediately.	ar	ever since late update release program stop work completely every time try run application crash shut immediately	Negative	App Store	0	1	0
App Store	a95558bf-ffc6-4c9b-8cbc-31b03217d529	ام حمد@	5/9/23 9:55	التطبيق لايعمل				en	sa	snb-mobile	The application is not working, every time I enter it, it kicks me out. I request a software update to be done.	ar	application work every time enter kick request software update do	Negative	App Store	0	1	0
App Store	b00b1222-c86b-4e51-8885-11542994e98a	REEMI22	5/9/23 9:22	تطبيق لا يخدم				en	sa	snb-mobile	"When will you solve the problem with the application so we can start using it to complete our tasks?! It's not fair that you keep causing us this inconvenienceð¡"	ar	solve problem application start use complete task fair keep cause us inconvenience	Negative	App Store	0	1	0
App Store	0f5b468d-86d1-44be-9eca-47aa4fb6203c	فهد0020398337	5/9/23 8:53	تطبيق عطلان				en	sa	snb-mobile	The application has been malfunctioning for a week for me. Every time I try to enter, it kicks me out after the latest update I did. It has disrupted my transactions, transfers, and everything. I am back to 2010. If I need anything, I have to go to your branch and deal with the crowd myself.	ar	application malfunction week every time try enter kick late update disrupt transactions transfer everything back need anything go branch deal crowd	Negative	App Store	0	1	0
App Store	97948eef-5206-4f7d-8a7e-fef925032c08	اناددبقااتغااتورز	5/9/23 7:33	زق				en	sa	snb-mobile	I have the worst luck in life and the worst services.	ar	bad luck life bad service	Negative	App Store	1	0	0
App Store	00563a4c-faab-499c-8338-1d7b8c396479	Abu Yousef Alelyani	5/8/23 20:09	ا				en	sa	snb-mobile	Why is the app not working?	ar	app work	Negative	App Store	0	1	0
App Store	2da3e115-142e-41a0-9129-634592a6b8a0	عممير	5/5/23 16:26	السعودية				en	sa	snb-mobile	The program/system refuses to accept the card.	ar	programsystem refuse accept card	Negative	App Store	0	1	0
App Store	fd14321e-d778-4fd9-8959-7a2c04ba16e2	Gnon..	5/8/23 18:13	التطبيق معلق يطلعني فجاة				en	sa	snb-mobile	Your latest update of the application is bad and unsuccessful. Instead of fixing, you only ruin it.	ar	late update application bad unsuccessful instead fix ruin	Negative	App Store	1	1	1
App Store	0405de01-0090-4863-8ca9-5862b164e308	Zez6	5/8/23 16:19	لا خدمة بالفروع ولا بالتطبيق!				en	sa	snb-mobile	Why doesn't a bank the size of Al Ahli invest in digital channels?	ar	doesnt bank size al ahli invest digital channel	Neutral	App Store	0	1	0
App Store	4efae253-9acd-4ae0-8e2a-b0c7f4d69136	Ibrahim 24	5/8/23 12:43	تطبيق البنك الاهلي				en	sa	snb-mobile	The worst banking application in Saudi Arabia.	ar	bad bank application saudi arabia	Negative	App Store	1	0	0
App Store	09a39807-72df-47dc-bea0-0de059af8e8b	hassan.aan	5/8/23 5:38	سيئ				en	sa	snb-mobile	A very bad application to the extreme. The application is normally functioning, but suddenly it updates and crashes, and it doesn't open. This is not the first time it has happened, and I don't know if you guys are making updates for fixing it or making it worse.	ar	bad application extreme application normally function suddenly update crash doesnt open first time happen dont know guy make update fix make bad	Negative	App Store	1	1	1
App Store	5f74cd3b-f890-40f5-ad8f-0e4b2f7504de	siiiiiiii soooooooo	5/8/23 0:04	مشاكل في التطبيق				en	sa	snb-mobile	The application has been not working for a few days for someone. What is the solution?	ar	application work days someone solution	Negative	App Store	0	1	0
App Store	1d20e687-2d50-4068-a33d-3108af4350b7	Suppppprrrr\:	5/7/23 7:57	حملو الراجحي				en	sa	snb-mobile	Because this is the worst application.	ar	bad application	Negative	App Store	1	0	0
App Store	569e717f-675e-4170-b60f-e5ea62c2b8f5	أبوغصن	5/6/23 22:34	رجعونا لسامبا ،،، التطبيق لايعمل بعد التحديث				en	sa	snb-mobile	Unfortunately, I expected that Samba, after merging with Al-Ahli, would improve its services even more. But unfortunately, things have become worse than before ð¡. There are frequent updates to the application that make things worse every time they fix something. Each update consumes the device's memory and unfortunately, it's not worth it. I will withdraw my balance from the bank and transfer …	ar	unfortunately expect samba merge alahli would improve service even unfortunately things become bad frequent update application make things bad every time fix something update consume devices memory unfortunately worth withdraw balance bank transfer alrajhi bank bank im sure good	Negative	App Store	1	1	0
App Store	6e7918a0-ed7d-49d0-ac8d-93122973f72e	ryan8589	5/6/23 17:57	خطاء تقني				en	sa	snb-mobile	I request a solution for the problem of the application not functioning properly after the latest update.	ar	request solution problem application function properly late update	Negative	App Store	0	1	0
App Store	9d73abd7-fa90-47f7-9081-b5fcb13958bb	i-atheer	5/6/23 16:18	التطبيق يطلعني كل شوي				en	sa	snb-mobile	The application keeps logging me out frequently and does not accept login.	ar	application keep log frequently accept login	Negative	App Store	0	1	0
App Store	5720369d-0a39-409e-a6fe-dd9de4703eed	hgshedb ebdjjm	5/5/23 23:05	فاشل التطبيق				en	sa	snb-mobile	The application has not been working for over a month, and there has been no response! Where are the rights of the customers? You guys are neglecting them like this!	ar	application work month response right customers guy neglect like	Negative	App Store	1	1	0
App Store	19f71836-5c5e-409e-b660-4e6196f9d0fb	محمد ابن زبن	5/5/23 22:38	بنك فاشل تطبيقه				en	sa	snb-mobile	Bank worst Application	ar	bank bad application	Negative	App Store	1	0	0
App Store	c540c704-1f71-4a4f-9cfa-38d848381dff	banooo55	5/5/23 10:49	مايدعم ابل بي ليه				en	sa	snb-mobile	I'm trying to put the card in my wallet, but my mobile doesn't accept it. Why? Where is the problem? Could someone help me?	ar	im try put card wallet mobile doesnt accept problem could someone help	Negative	App Store	0	1	0
App Store	2080656f-bb9c-4d38-91a6-05521c2c15bc	ygadfc ghj	5/5/23 6:46	لا يعمل التطبيق				en	sa	snb-mobile	The application does not work after the update, it opens and then kicks me out immediately. It is useless, I deleted it and reinstalled it, but it still doesn't work. I have no justification for your behavior.	ar	application work update open kick immediately useless delete reinstall still doesnt work justification behavior	Negative	App Store	0	1	0
App Store	cda90989-816f-41bc-8448-1c9ac35cbc41	الشاعر مشاري العضيله	5/5/23 1:44	التطبيق لا يعمل حاليا الرجاء تحديثه				en	sa	snb-mobile	The application is not working and it exits while opening the application.	ar	application work exit open application	Negative	App Store	0	1	0
App Store	59177a86-5dca-4c99-9325-7366202607cb	اناء	5/5/23 0:23	خايس التحديث الجديد مايفتح معي				en	sa	snb-mobile	The new update does not open.	ar	new update open	Negative	App Store	0	1	0
App Store	c27449e9-633f-482f-8e4d-0b18ac9b8883	Pharm9997	5/4/23 20:34	المحفظة الرقمية				en	sa	snb-mobile	We are facing a problem adding the Al Ahli debit card to the digital wallet, knowing that I have been having this issue since mid-Ramadan.	ar	face problem add al ahli debit card digital wallet know issue since midramadan	Negative	App Store	0	1	0
App Store	1e342f68-b52f-4d5c-a025-23439fb0b0bb	Mohammed r	5/4/23 19:04	توقف عن العمل تماما				en	sa	snb-mobile	The application stopped working after the latest update today. When I press on the application, it opens and closes immediately. It seems that changing to another bank is necessary now.	ar	application stop work late update today press application open close immediately seem change another bank necessary	Negative	App Store	0	1	0
App Store	7a6585b1-5a52-4843-8acd-8a95f670e3cf	فنون غرفتي	5/4/23 15:56	موقع سيء ولا يخدمك كثير فقط تعرف كم الرصيد				en	sa	snb-mobile	The most complicated and always problematic and slow website.	ar	complicate always problematic slow website	Negative	App Store	1	0	1
App Store	42b44524-167b-4dd3-b8d1-60e9c84389eb	ال الزهراني	5/4/23 12:36	بنك مبتدئ وسيئ				en	sa	snb-mobile	Very bad bank, even a beginner bank is better.	ar	bad bank even beginner bank good	Negative	App Store	1	0	0
App Store	24454a55-61e4-48b5-8db4-ff3628fef4e0	Slmm3601	4/30/23 21:00	المنطقة الشرقية				en	sa	snb-mobile	A great application! May Allah bless your efforts ðð¼â­ï¸â­ï¸â­ï¸â­ï¸â­ï¸	ar	great application may allah bless efforts	Positive	App Store	1	0	0
App Store	b79becce-4883-4646-bffa-56161d9902db	Draftsmanksa	5/4/23 6:01	معاناتي مع البنك الأهلي				en	sa	snb-mobile	After the latest update, it's not working for me because my phone is old and it doesn't work with older versions of iOS.	ar	late update work phone old doesnt work old versions ios	Negative	App Store	0	1	0
App Store	8f949c61-b584-4433-b5a2-0558d6c69441	Zahra.m1	5/3/23 22:09	مزعج				en	sa	snb-mobile	How often do you update and prolong, causing us frustration! Not to mention, every time we enter the application, despite updating, a notification for an update appears and when we press it, it takes us back to the App Store, and then we have to open it from there!	ar	often update prolong cause us frustration mention every time enter application despite update notification update appear press take us back app store open	Negative	App Store	1	1	0
App Store	b25e99b9-a7b7-4767-82c0-0d83ba3d2039	GFY213	5/2/23 16:21	أصبح التطبيق سيئ				en	sa	snb-mobile	After the latest update, logging in has become difficult. It gives you an error message every time. I have to contact the bank about it. And when I finally log in to the account, I have to wait for an hour for the page to load. And if I want to transfer, I have to repeat the process multiple times. The update is very bad.	ar	late update log become difficult give error message every time contact bank finally log account wait hour page load want transfer repeat process multiple time update bad	Negative	App Store	1	1	0
App Store	c0c27d8c-39bc-4c1e-ae4c-cddb00b669ec	walaama	5/2/23 14:26	بطيء				en	sa	snb-mobile	I have been trying the application for 5 days, but it is not working and is out of service. My command is disabled and very, very slow.	ar	try application days work service command disable slow	Negative	App Store	0	1	1
App Store	19171224-d5bc-4cb1-b172-70f6f80fd2eb	Nora Zahrani	5/1/23 12:33	اخر تحديث فاشل				en	sa	snb-mobile	The latest update is extremely unsuccessful. Every time I enter, it shows me in a strange and annoying way to the point where I am considering switching to Al Rajhi Bank because of the application!!	ar	late update extremely unsuccessful every time enter show strange annoy way point consider switch al rajhi bank application	Negative	App Store	1	1	0
App Store	703e6aab-389b-436c-9eb7-fafd1a3dce0b	benkman bkl	5/1/23 3:11	ميو				en	sa	snb-mobile	It's like bad luck, every time I try to open the application, it's not working.	ar	like bad luck every time try open application work	Negative	App Store	1	1	0
App Store	73fc7aca-c3c6-4630-85ae-32bb6e705a79	khaled mutary	5/1/23 0:01	بنك فاشل				en	sa	snb-mobile	Updates every day for the application without any benefit and the transfers keep encountering errors every now and then, and there are no offers. God willing, I will switch to another bank.	ar	update every day application without benefit transfer keep encounter errors every offer god will switch another bank	Negative	App Store	0	1	0
App Store	f3c8a783-880b-4951-9d44-ade918fabf15	AdfAliAla	4/30/23 21:06	التطبيق لا يعمل عل ايفون٦بلس				en	sa	snb-mobile	The application is not working on iPhone 6, my device's update is 12.5.7. The application was working before the latest update, what is the problem with my device? The applications for Riyadh and Al Rajhi banks are updated and working, except for Al Ahli bank. I have already deleted and reinstalled it multiple times, but it still doesn't work. Your latest update is very, very bad.	ar	application work iphone devices update application work late update problem device applications riyadh al rajhi bank update work except al ahli bank already delete reinstall multiple time still doesnt work late update bad	Negative	App Store	1	1	0
App Store	ec9baadf-b8f0-4fbc-9e36-2c3c90627104	منننننتااااااز	4/30/23 20:06	مشكله بالتطبيق				en	sa	snb-mobile	I have been trying to change my mobile number but Al-Ahli bank has not contacted me for the mobile authentication. I contacted the bank but they do not have a solution. The problem has been going on for a week and I still can't access the application. I filed a complaint but no response has been received. I will file a complaint with the Monetary Authority and demand immediate resolution of the p…	ar	try change mobile number alahli bank contact mobile authentication contact bank solution problem go week still cant access application file complaint response receive file complaint monetary authority demand immediate resolution problem compensation damage cause financial service disrupt	Negative	App Store	0	1	0
App Store	08e30863-d7ad-4860-983c-ee3d64517570	hsoonah633	4/30/23 20:18	مشاكله كثير				en	sa	snb-mobile	Oh brother, I swear, this recent period has been the worst with this bank. More than once, I needed to transfer a very important and urgent amount, but every time I try, an error occurs. Every time, it's the same problem. It's been happening for several months now, and it has caused me a lot of trouble. I have gotten into many problems because of this issue and I have been embarrassed in front of…	ar	oh brother swear recent period bad bank need transfer important urgent amount every time try error occur every time problem happen several months cause lot trouble get many problems issue embarrass front people regret deal	Negative	App Store	1	1	0
App Store	d3659976-91df-4fe4-b964-4f0650ec19d0	Jawad60	4/25/23 23:40	متكرر الاخطاء ويمنع من عمل عمليات التحويلات				en	sa	snb-mobile	Please fix the errors that prevent the transfer and banking transactions. To make the transfer, you need to retry multiple times.	ar	please fix errors prevent transfer bank transactions make transfer need retry multiple time	Negative	App Store	0	1	0
App Store	6731963a-704e-4606-bb06-78261b964ca0	sultanah alissa	4/30/23 14:20	اسوء تطبيق بنكي				en	sa	snb-mobile	It's unbelievable that I've been trying to switch between my accounts and I haven't received the activation code. It's even more unbelievable that when I call the bank, I can't access my account because you don't send the activation code. You're treating us with disrespect.	ar	unbelievable ive try switch account havent receive activation code even unbelievable call bank cant access account dont send activation code youre treat us disrespect	Negative	App Store	1	1	0
App Store	1f654108-9825-41b4-98ce-0f2f390bf723	Loody2030	4/29/23 7:07	التطبيق كان يعمل بطريقة سيئة والان لا يعمل نهائياً				en	sa	snb-mobile	The best banking application I had is unfortunately not available to me now.	ar	best bank application unfortunately available	Negative	App Store	1	0	0
App Store	c0aaf063-d03c-4357-9077-c003dc513d37	ناصر ابو ريان	4/28/23 16:22	اسواء بنك				en	sa	snb-mobile	I advise anyone who is able to leave and change the bank quickly. I swear by God that this bank is very complicated and bad.	ar	advise anyone able leave change bank quickly swear god bank complicate bad	Negative	App Store	1	0	0
App Store	bdba8a4c-4b51-4149-9d27-32fe412cd907	سلطان شيخ الوادي	4/28/23 6:45	جدة				en	sa	snb-mobile	"May God bless the good old days when it was the worst bank in the Middle East."	ar	may god bless good old days bad bank middle east	Negative	App Store	1	0	0
App Store	22e38551-1f12-4256-9996-2ca48a54b290	MohammedSA1	4/27/23 23:19	اسوء بنك على كوكب الارض👎🏻👎🏻👎🏻👎🏻				en	sa	snb-mobile	Every two days there is an update and the application is under maintenance for 24 hours, and it is frighteningly slow. I wish you could learn from Al-Rajhi bank, and I swear to God, I will close my account with you. We are in the era of speed, where all simple and large applications have become excellent and fast, except for you. If there was a rating less than a quarter star, I would have given …	ar	every two days update application maintenance hours frighteningly slow wish could learn alrajhi bank swear god close account era speed simple large applications become excellent fast except rat less quarter star would give shame classify among wellknown bank saudi arabia	Negative	App Store	1	0	1
App Store	bb4118e5-82e4-4b4c-bcfc-fed66dfc7c9b	خالدين حماد الشمري	4/27/23 9:12	التطبيق لا يعمل خارج المملكة				en	sa	snb-mobile	Unfortunately, the application does not work in South Africa.	ar	unfortunately application work south africa	Negative	App Store	1	1	0
App Store	0125e76f-cf49-403b-804b-78ad0e4959f9	anwarr.a.m	4/26/23 21:27	اسوأ تطبيق				en	sa	snb-mobile	The commentator is always logging out by itself. Most of the operations, whether it is a transfer or repayment, result in an error occurring a million times. I have to repeat the operation.	ar	commentator always log operations whether transfer repayment result error occur million time repeat operation	Negative	App Store	0	1	0
App Store	f9698dda-74e4-473b-a6b0-d854f09bb291	الببزرلب	4/25/23 21:00	مشكلة في برنامج الاهلي				en	sa	snb-mobile	After logging in, I receive a notification to verify my mobile number, but here's the issue: it asks me to enter a number and I don't know what number it is referring to. I have a Google account, but the application doesn't seem to find a solution for me. Can you (Al Ahli Bank) help me find a solution?	ar	log receive notification verify mobile number heres issue ask enter number dont know number refer google account application doesnt seem find solution al ahli bank help find solution	Negative	App Store	0	1	0
App Store	f603ec71-318f-4efa-b902-cc6a2ca36e23	YassenQattan	4/23/23 18:34	لازم اروح الفرع				en	sa	snb-mobile	The application is excellent, but unfortunately, I have to go to the branch. It's great that you can update your identity from the application, but I can't update my mobile number and national address from the application. I contacted the bank about updating my mobile number, and they told me to use the self-service machine at the branch. However, every time I went to the branch, the self-service…	ar	application excellent unfortunately go branch great update identity application cant update mobile number national address application contact bank update mobile number tell use selfservice machine branch however every time go branch selfservice machine order selfservice machine defective one ever see either defect unlucky system sensors devices selfservice deposit atm notify management soon devi…	Negative	App Store	1	1	0
App Store	01e62d62-7000-4f8d-ad6a-d22914bb1a88	Sawsan 123	4/25/23 19:04	تطبيق سيء				en	sa	snb-mobile	"The worst application, honestly. I can't wait to finish paying off my loan from you and transfer my salary to another bank. I swear to God Almighty."	ar	bad application honestly cant wait finish pay loan transfer salary another bank swear god almighty	Negative	App Store	1	1	1
App Store	346e0960-d534-4d24-ad95-1296c8599961	أحمد صالح الجاسم	4/24/23 21:54	اسوء تحديث تم تقديمه من البنك حاليا				en	sa	snb-mobile	The application is very, very bad. It does not meet our needs at all. It has been over a month and there are still many problems with the application. The bank does not seem concerned about its customers.	ar	application bad meet need month still many problems application bank seem concern customers	Negative	App Store	1	1	0
App Store	530915a2-66df-4b30-9fb1-91f267b3f207	viiygoojbkphfffjhvjkgo	4/15/23 15:03	سيء جدا للاسف				en	sa	snb-mobile	I am unable to transfer to beneficiaries from other banks. I have tried multiple times until it worked with only two people. The problem is not only with me, but also with several other people at Al Ahli Bank. I hope you can find out the reason.	ar	unable transfer beneficiaries bank try multiple time work two people problem also several people al ahli bank hope find reason	Negative	App Store	0	1	0
App Store	f501f67f-827d-4cca-9a79-934c922729fe	Yousefv	4/23/23 15:08	مشكلة تقنية				en	sa	snb-mobile	For almost a week, I've been trying to access my account through your app, and there's a maximum limit for the password characters that doesn't allow me to complete my own password... It's a terrible app in every sense of the word.	ar	almost week ive try access account app theres maximum limit password character doesnt allow complete password terrible app every sense word	Negative	App Store	0	1	0
App Store	f0981208-8c5d-4b1b-8200-e571201d44bf	Midofaraf	4/22/23 22:30	طلب منى تحديث اللون لاين ابلكيشن وعند التحديث ازيل الابليكشن ولم يتم التحديث				en	sa	snb-mobile	Please help to restore the application.	ar	please help restore application	Neutral	App Store	0	1	0
App Store	f4c9f096-70fc-406c-8b16-63933eea8d10	Fatimma Yahya	4/21/23 3:09	تطبيق سيء				en	sa	snb-mobile	"I transferred from another bank and received a message, but the money did not arrive in the account. This problem has been going on for a while now. I hope you can improve yourselves a bit ð"	ar	transfer another bank receive message money arrive account problem go hope improve bite	Negative	App Store	0	1	0
App Store	bfafad0f-a8dc-4ff0-ada9-5014a5960030	ابو فيصل 53	4/20/23 6:48	خلل فني				en	sa	snb-mobile	The application has had a problem for a while, which is that when I open it, it doesn't work for me. However, when I go to the App Store and open it from there, it works. This problem has been going on for about two months.	ar	application problem open doesnt work however go app store open work problem go two months	Negative	App Store	0	1	0
App Store	377e6d03-9161-498e-a60b-03e08e9ef6d6	the Sky Of K.	4/19/23 19:58	Complicated				en	sa	snb-mobile	If you change your cellphone, you won't be able to access or use the application anymore. Even when you call to resolve the issue and enter your information, the service is still very bad. ðð»ðð»ðð»	ar	change cellphone wont able access use application anymore even call resolve issue enter information service still bad	Negative	App Store	1	1	0
App Store	e2e4098a-2ad8-4dd6-b4c1-d1408e77d409	عميل الاهلي	4/19/23 18:47	سيى جداً التطبيق مش راضي يفتح إطلاقاً				en	sa	snb-mobile	The worst update, those responsible for it must review the application.	ar	bad update responsible must review application	Negative	App Store	1	0	0
App Store	9dab690d-7b4e-4d00-80f5-80dd205941a7	walebdj	4/18/23 18:40	بنك زق				en	sa	snb-mobile	Azq Bank.	ar	azq bank	Neutral	App Store	1	0	0
App Store	1e87ef2e-148d-40e5-ada7-47a64efc50f1	كومب الأرض	4/18/23 13:11	البنك الاهلي ورطه				en	sa	snb-mobile	They are stuck in this bank, they lack flexibility and have poor implementation.	ar	stick bank lack flexibility poor implementation	Negative	App Store	1	0	1
App Store	5d0a6c7d-c8c7-42a1-b171-da70e8a97d6d	Al-rooooqy	4/17/23 19:16	عطل في البرنامج				en	sa	snb-mobile	There is a malfunction in the program, so the application cannot be opened for a period of more than two weeks.	ar	malfunction program application open period two weeks	Negative	App Store	0	1	0
App Store	b323a027-4013-46c6-9bfb-9ac9cc5c69dc	a.n.e.r.c	4/17/23 17:00	د				en	sa	snb-mobile	Translation: "Some of the dirtiest banks that one can deal with, may God destroy them."	ar	translation dirty bank one deal may god destroy	Negative	App Store	1	0	0
App Store	b7fed848-7a2f-4894-8d9b-359dad4fe1bf	faisal...1	4/17/23 1:09	تطبيق سيئ جدا				en	sa	snb-mobile	The transfer cannot be accepted and it always gives me an "error occurred" message! There is no account transfer statement like the old application; it is unnecessarily complicated.	ar	transfer accept always give error occur message account transfer statement like old application unnecessarily complicate	Negative	App Store	1	1	0
App Store	97fa9410-cfc4-4b58-9b99-0ee64669fb49	Abdullmalik787	4/16/23 2:04	التحويل				en	sa	snb-mobile	The conversion is often faulty ðð»	ar	conversion often faulty	Negative	App Store	1	1	0
App Store	79bbcd7c-fc55-47bb-9dfa-a4b2f4457b3e	Jibra04	4/15/23 12:45	ابوعبدالباسط				en	sa	snb-mobile	The application on my device is not working after the latest update. Only the first screen with the bank's logo appears and the application does not work.	ar	application device work late update first screen bank logo appear application work	Negative	App Store	0	1	0
App Store	19429588-b391-4d9d-881c-54f986e5d7ca	غالي السلمي	4/15/23 13:44	سيء				en	sa	snb-mobile	The worst banking application in the world, guys improve your services, you are one of the largest banks in Saudi Arabia.	ar	bad bank application world guy improve service one large bank saudi arabia	Negative	App Store	1	0	0
App Store	b9828be2-96e8-440c-aa93-2cd5cdf04714	عزيز ٣٦٨	4/14/23 5:04	ابلكيشن ولا بريال				en	sa	snb-mobile	Very weak application and with every update, it gets worse than before!!!! And it hangs a lot.	ar	weak application every update get bad hang lot	Negative	App Store	1	0	1
App Store	631f6b49-4651-4c4a-99af-920cf9a19da1	ommno	4/13/23 21:05	استفسار؟؟				en	sa	snb-mobile	Why is it suspended? I've been trying to update it for a few days now!!	ar	suspend ive try update days	Negative	App Store	0	0	1
App Store	ef8c3b60-710f-403b-ab48-898e6e80b49b	محسن ،6	4/12/23 1:08	الي متى ي الاهلي				en	sa	snb-mobile	The worst bank with the worst application that has not been opening for more than a week, and through the website, it also does not open. The solution is to close your accounts with them and open with any other bank.	ar	bad bank bad application open week website also open solution close account open bank	Negative	App Store	1	1	0
App Store	c4324f3e-796f-4f4b-abc3-a7a2a7ac23dd	Bandaralyasi	4/13/23 20:47	مشكلة في التطبيق				en	sa	snb-mobile	There is a problem, it hangs a lot and sometimes doesn't work. Please find a solution for this problem. Thank you.	ar	problem hang lot sometimes doesnt work please find solution problem thank	Negative	App Store	0	1	1
App Store	650f81cb-5c2f-481a-a40e-980c7034e980	Bo sawood	4/13/23 17:09	التطبيق لا يعمل				en	sa	snb-mobile	Since the beginning of Ramadan and now it is the 22nd day of Ramadan, the application is not working. I have sent several messages to the bank on Twitter, informing them of the problem, but there has been no response from the responsible officials. I have tried again, but this is unacceptable. A bank that does not care about the satisfaction of its customers. I have finally decided to switch to a…	ar	since begin ramadan nd day ramadan application work send several message bank twitter inform problem response responsible officials try unacceptable bank care satisfaction customers finally decide switch another bank due lack interest solve problem thank	Negative	App Store	1	1	0
App Store	345916f4-42b4-4e99-bf7b-8de1bc47a2ee	ابو الفاروق ١	4/13/23 5:17	التطبيق سئ بعد اخر تحديثات				en	sa	snb-mobile	The application freezes and kicks you out immediately after logging in, asking you to log in again, and so on. It could take four or five attempts to finally access the services, wasting time and being tedious. The previous system, before the recent strong update, was better organized and people were familiar with its features and how to use each service. But who benefits from changing the applic…	ar	application freeze kick immediately log ask log could take four five attempt finally access service waste time tedious previous system recent strong update good organize people familiar feature use service benefit change application corruption al ahli bank people consider switch al rajhi bank technically advance bank	Negative	App Store	1	1	1
App Store	20a314d2-c544-4696-a991-0cab4bcce2c0	ابو حنيني	4/13/23 3:11	اصبح سيئ جدا				en	sa	snb-mobile	The Ahli mobile application has become unbearable. It crashes a lot and credit card transactions no longer appear. Problems, problems.	ar	ahli mobile application become unbearable crash lot credit card transactions long appear problems problems	Negative	App Store	0	1	1
App Store	3851952a-47b7-4134-9c6f-64a3af8a6961	a.g.a.m	4/13/23 2:54	اتمنى ما عاد تسووا ابديت لأنه عالفاضي				en	sa	snb-mobile	"You are killing us every day with an update and nothing changes in the application."	ar	kill us every day update nothing change application	Negative	App Store	1	0	0
App Store	8307bd40-6f3b-4624-886a-9c6c95a9a14b	سند العولقي	4/12/23 22:46	لا يعمل بجهازي				en	sa	snb-mobile	I used the application freely after the new update, but now the application doesn't open and gets stuck on the green screen.	ar	use application freely new update application doesnt open get stick green screen	Negative	App Store	0	1	1
App Store	b106ae4b-a692-4c3b-b899-838a4a5bc97c	Sab⭐️⭐️⭐️	4/12/23 13:17	كل يومين تحديث شيء مزعج				en	sa	snb-mobile	New update every two days!	ar	new update every two days	Neutral	App Store	0	1	0
App Store	74234442-86a1-4c4d-9b8c-d6209177b0b9	skdjjdkdkdkd	4/10/23 17:18	.				en	sa	snb-mobile	Everyday update, everyday update	ar	everyday update everyday update	Neutral	App Store	1	0	0
App Store	b0910396-edf1-4040-9bf2-b9b5bdd51fcb	klose Muaddi	4/11/23 19:55	صبرٌ جميل				en	sa	snb-mobile	Curse the application on the face of the earth.	ar	curse application face earth	Negative	App Store	1	0	0
App Store	ce031e80-76bb-42c4-b578-2212b48edb94	ولاشي زي تحديثكم	4/10/23 21:05	زفت كل يوم تحديث زي الخرا				en	sa	snb-mobile	This phrase does not have a specific meaning in Arabic. It is a repetition of the word "zift," which can mean "excrement" or "filth." However, it may also be used as an expression of frustration, disappointment, or annoyance.	ar	phrase specific mean arabic repetition word zift mean excrement filth however may also use expression frustration disappointment annoyance	Negative	App Store	1	0	1
App Store	00ce1e82-3d26-4a61-8cc3-27b852d35056	husseinmoon	4/10/23 18:35	وجود مشكله في تحديث بيانات				en	sa	snb-mobile	I previously contacted customer service regarding the issue, and they told me the problem is with the application. Instead of raising the Ahli logo high, you will lower it due to negligence.	ar	previously contact customer service regard issue tell problem application instead raise ahli logo high low due negligence	Negative	App Store	1	0	0
App Store	552d2201-0aa8-4bba-8fea-ed86ca1025b8	عفلد	4/10/23 16:25	التطبيق لا يعمل على نظام iOS 12.5				en	sa	snb-mobile	The same problem, the application does not open even though my phone has iOS 12.5. I want to know what the problem is.	ar	problem application open even though phone ios want know problem	Negative	App Store	0	1	0
App Store	3850140a-8e1d-4a0c-9f25-2124858e22f9	عساف الحربي	4/10/23 12:54	بنك سي جدا جدا				en	sa	snb-mobile	Very very cool	ar	cool	Positive	App Store	0	0	0
App Store	a91b2e9c-0c20-440b-a679-53c636e78c0c	ال كن	4/10/23 10:24	استغفر الله				en	sa	snb-mobile	A thousand times of updating and then the application doesn't open. And if I download the application on another device, I have to wait two days for security reasons.	ar	thousand time update application doesnt open download application another device wait two days security reason	Negative	App Store	0	1	0
App Store	beaf3661-3f6c-4f03-8445-d20ead25612e	أبواسحاق	4/10/23 9:49	تطبيق خايس مره				en	sa	snb-mobile	This application is almost constantly updating the data that we use and it is not for Al Ahli Bank. It is unlawfully taking our information without any justification. Why?	ar	application almost constantly update data use al ahli bank unlawfully take information without justification	Negative	App Store	1	0	1
App Store	16ac1113-cb2e-4934-a2fb-a84373ee6bea	daifedd	4/10/23 7:50	السعودية				en	sa	snb-mobile	I encountered a problem with the Ahli application in logging in, which is a login rejection during authentication and sometimes requires one or two retries.	ar	encounter problem ahli application log login rejection authentication sometimes require one two retry	Negative	App Store	0	1	0
App Store	91cc5bde-4ca9-4ae9-b7b4-670182ad5ad0	شاهين الشريف	4/10/23 7:03	التطبيق لا يعمل ،				en	sa	snb-mobile	I have deleted the application more than once and reinstalled it, but without any benefit. The application is not working.	ar	delete application reinstall without benefit application work	Negative	App Store	0	1	0
App Store	88e4b612-b0b6-4f96-8be0-92c8f4096ba3	roojy4997	4/10/23 4:50	-				en	sa	snb-mobile	Updating the program is exhausting.	ar	update program exhaust	Negative	App Store	0	1	0
App Store	4a412c41-9f14-4982-9d1f-a680b499b674	عصيل	4/10/23 3:08	زفت				en	sa	snb-mobile	You guys are worst, you sons of a dog.	ar	guy bad sons dog	Negative	App Store	1	0	0
App Store	874d54f2-6da3-4d69-9a3e-6a52ef8c2b2f	حسوووووون ١٠	4/9/23 3:12	لم اجد سداد رسوم الاجانب في التطبيق				en	sa	snb-mobile	Dear Ahli (or Ahly)	ar	dear ahli ahly	Neutral	App Store	0	0	0
App Store	c6ac0755-531e-4b84-9eed-7039d870812c	الللليامي	4/9/23 22:16	مبالغين في تحديث البرنامج				en	sa	snb-mobile	Unfortunately, due to the frequent updates of the application, I have come to hate the application and using it. And also dealing with Al Ahli Bank.	ar	unfortunately due frequent update application come hate application use also deal al ahli bank	Negative	App Store	1	1	0
App Store	1f376184-9839-4fbb-b7b4-2ab852caf14b	ابو خوذة ٥٩	4/9/23 21:55	يطلب تحديث باستمرار				en	sa	snb-mobile	He requests an update excessively. You are in a hurry, wanting to pay a bill and sleep. He requests an update, you are in a hurry, wanting to top up your mobile credit and go to work. He requests an update. This is complicated and frustrating. You won't believe it, but the update takes more than a quarter of an hour. Don't think that the mobile network is good everywhere.	ar	request update excessively hurry want pay bill sleep request update hurry want top mobile credit go work request update complicate frustrate wont believe update take quarter hour dont think mobile network good everywhere	Negative	App Store	1	1	1
App Store	6676345a-7e8f-4091-b838-aa29f73c9f94	majedhakami	4/9/23 17:24	سيئ جدا				en	sa	snb-mobile	The most updated application is the slowest and has more issues. I don't know what the benefit of daily updates is when the problems still exist.	ar	update application slow issue dont know benefit daily update problems still exist	Negative	App Store	0	1	1
App Store	c50144fd-944f-49c9-9cf1-a79933ce2d8a	Zz050865	4/8/23 21:09	افضل ابلكيشن بنك فالشرق الاوسط وخدمات اكثر من رائعة				en	sa	snb-mobile	I would like to thank those in charge of the program #Great_Saudi_Arabia.	ar	would like thank charge program greatsaudiarabia	Positive	App Store	0	0	0
App Store	65db0245-47d5-4ec6-b9c5-d64c555587c4	gh12;:	4/9/23 2:18	فشل				en	sa	snb-mobile	Failure	ar	failure	Negative	App Store	0	1	0
App Store	3784071d-38e1-4bd5-bb72-030ec4c9a212	Rna_Mohd	4/9/23 0:59	Accounts transfer				en	sa	snb-mobile	I don't know what the problem is, but every time I try to transfer an amount between my accounts, I get the message "something went wrong," despite the appearance of new updates for the application. This problem has not been resolved.	ar	dont know problem every time try transfer amount account get message something go wrong despite appearance new update application problem resolve	Negative	App Store	0	1	0
App Store	a3092f9e-8079-47f9-a391-a1ea69868f3c	ابو الليل١	4/8/23 21:23	التحويل ل STC PAY				en	sa	snb-mobile	There is a problem with the STC conversion. The system does not accept it at all, even after adding the payment number. Please solve the problem.	ar	problem stc conversion system accept even add payment number please solve problem	Negative	App Store	0	1	0
App Store	02bffd0c-2277-45c4-9db5-2292d02019c6	f2srss	4/8/23 14:16	تطبيق ممتاز وسهل الاستعمال دز				en	sa	snb-mobile	We hope for continuation.	ar	hope continuation	Positive	App Store	1	0	0
App Store	75568c65-0124-41be-b8a7-81792d1d2209	shoosh almutiri	4/8/23 20:34	👎🏻👎🏻👎🏻👎🏻				en	sa	snb-mobile	I do not recommend dealing with this bank. Every now and then there is an update that causes their services to become ineffective. I couldn't transfer an embarrassing amount to my Ahli account because it says (alternative ID is not available)!!!!!!	ar	recommend deal bank every update cause service become ineffective couldnt transfer embarrass amount ahli account say alternative id available	Negative	App Store	1	1	0
App Store	7d7d04da-f884-4e35-938d-c1b70c6a255b	bn1427	4/8/23 19:13	تحديث				en	sa	snb-mobile	The problem with the app is that it asks for an update every two days???	ar	problem app ask update every two days	Negative	App Store	0	1	0
App Store	06f0be32-f791-4341-9eb0-4b783b62f63f	Abdulmajeed Alghamdi	4/8/23 18:13	تطبيق سيء				en	sa	snb-mobile	Every time I talk, the application crashes and doesn't open for me. Now I have to open Google every time I want to access my account.	ar	every time talk application crash doesnt open open google every time want access account	Negative	App Store	0	1	1
App Store	d8e14353-1bcf-4a0d-aabf-6456e568dee7	Moostafa said	4/8/23 18:03	يطلب تحديث متكرر				en	sa	snb-mobile	Every time the command is requested, the update is repeated.	ar	every time command request update repeat	Neutral	App Store	0	0	0
App Store	3de75129-918b-4f13-809e-0be39e065c7f	Saudi iPhone	4/8/23 14:54	التحديث يسبب مشكلة في الدخول الى التطبيق				en	sa	snb-mobile	After the update, the application immediately logs out.	ar	update application immediately log	Neutral	App Store	0	1	0
App Store	0928eed5-df34-42de-ab01-7cc219ff97cb	Asmaa Houssien	4/8/23 2:14	افضل بنك لولا				en	sa	snb-mobile	The best bank, if it weren't for their greed, raising interest rates, and increasing the conditions for real estate financing.	ar	best bank werent greed raise interest rat increase condition real estate finance	Neutral	App Store	1	0	0
App Store	f9ec1b5d-c85a-4fb6-b9b5-4011ebd3d2a2	فاطمه ٨٨	4/8/23 10:59	ممل جدا كل ماافتح التطبيق لازم تحديث				en	sa	snb-mobile	May Allah have mercy on Samba.	ar	may allah mercy samba	Positive	App Store	1	0	0
App Store	a25c9a86-5218-4ec3-86be-9a014110051c	Ddddddddxxxxdd	4/8/23 10:47	..				en	sa	snb-mobile	The application never opens for me after updating.	ar	application never open update	Negative	App Store	0	1	0
App Store	8f70d13e-d144-4126-93a7-37d45af068b2	زوز 08	4/8/23 4:38	0				en	sa	snb-mobile	The application doesn't open for me despite entering all the correct login information!!?	ar	application doesnt open despite enter correct login information	Negative	App Store	0	1	0
App Store	9dc7d7d2-45ab-4cda-8c67-d9a3195c343e	Alaa Alqthami	4/8/23 4:03	اسوء تطبيق في البنوك				en	sa	snb-mobile	It is bad and still not working after the latest two updates, and the technical support doesn't understand anything. Even if there was an option for giving them less than one star, I would give it to them.	ar	bad still work late two update technical support doesnt understand anything even option give less one star would give	Negative	App Store	1	1	0
App Store	f192ab72-1cdd-46a9-8606-1541db8dc58c	arsenalz12345	4/8/23 3:31	اسوأ تجربة				en	sa	snb-mobile	The residency ends, and the bank suspends your services. You don't know why. It's very frustrating. In two days, I will transfer to Al Rajhi Bank, God willing.	ar	residency end bank suspend service dont know frustrate two days transfer al rajhi bank god will	Negative	App Store	1	0	1
App Store	dc3ac87a-7b9a-43d1-a404-097d8b365a48	شرفـ	4/7/23 20:24	التطبيق ممتاز ولكن				en	sa	snb-mobile	Honestly, the frequent updates are very annoying. I mean, every month we go through multiple updates without any reason. Unless they are security updates, it should be optional for the user. It's unreasonable that every time I log into the application, I am surprised by a new update.	ar	honestly frequent update annoy mean every month go multiple update without reason unless security update optional user unreasonable every time log application surprise new update	Negative	App Store	1	1	0
App Store	b9682698-9460-4db7-a0e0-344a03da7294	خمسه نجوم 👍	4/8/23 2:12	اسوا بنك واسوا تحديث وماتفهم وش الطلبات عشان تستخدم ااتطبيق				en	sa	snb-mobile	The worst bank and the worst application.	ar	bad bank bad application	Negative	App Store	1	0	0
App Store	fa67f797-2510-4d89-ba92-49473e9fd76c	مهند سلطان	4/7/23 23:27	برنامج بطيء والتحديث كثير				en	sa	snb-mobile	Slow and frequently updated.	ar	slow frequently update	Neutral	App Store	0	0	1
App Store	880af154-5ba7-4a75-b60b-e88575f40fe8	فففففففغغغ	4/7/23 22:22	Application Crashing				en	sa	snb-mobile	Either fix the app or I will file a complaint against you. Everyone is complaining after the latest update and you haven't done anything. Today is Friday and tomorrow is Saturday. Sunday is your last chance.	ar	either fix app file complaint everyone complain late update havent do anything today friday tomorrow saturday sunday last chance	Negative	App Store	0	1	0
App Store	edff1324-6385-4722-a1f6-6612019203a7	ضحايا مادلين	4/7/23 14:32	تطبيق البنك				en	sa	snb-mobile	Oh bank administration, whenever I want to access my online account from the application, you send me to the store to download it again. Whether I open it from the store or try to update it, it doesn't matter how many times I update it. It's frustrating.	ar	oh bank administration whenever want access online account application send store download whether open store try update doesnt matter many time update frustrate	Negative	App Store	1	1	0
App Store	dc7d272b-c03e-4f32-9fa3-08f346b79805	Elham Z H	4/7/23 19:59	شكوى				en	sa	snb-mobile	During my trip and relying on the card for withdrawals from my account, you froze my account under the pretext of updating my information, even though I made sure to go to the nearest branch before my trip and update my details. When I tried to update my information through the phone during my trip, all attempts failed. When I called the bank's employees dozens of times through the mobile banking…	ar	trip rely card withdrawals account freeze account pretext update information even though make sure go near branch trip update detail try update information phone trip attempt fail call bank employees dozens time mobile bank service apologize able help stop freeze claim authority even though explain try update application phone result always appearance phrase apologize error update must solution p…	Negative	App Store	0	1	1
App Store	46b3c6a3-5a77-4096-a58b-cd4aa88ed342	نووووورنوووووه	4/7/23 18:33	مو راضي يفتح بعد التحديث معلق				en	sa	snb-mobile	It's not opening after the update, don't tell me to update your device because it's already updated.	ar	open update dont tell update device already update	Negative	App Store	0	1	0
App Store	a284b387-7e49-4ff3-9147-5a4693a5b9a9	n.7oot	4/7/23 17:05	Good				en	sa	snb-mobile	Good	en	good	Positive	App Store	0	0	0
App Store	1d075396-daf6-46b9-a8a3-56aadbffb393	﮼التميمي	4/7/23 17:01	بنك سيء وبرنامج سيء				en	sa	snb-mobile	I wish you would learn a little from Al-Rajhi. Add something useful for your customers in the program and stop updating it without any benefit.	ar	wish would learn little alrajhi add something useful customers program stop update without benefit	Negative	App Store	1	1	0
App Store	0b5ed50b-25c8-49c2-8356-34209a5c1f76	Ah. Ali	4/7/23 16:06	تطبيق مميز				en	sa	snb-mobile	Continuous development and updates. Thank you.	ar	continuous development update thank	Positive	App Store	0	0	0
App Store	4971f1e5-723b-46e7-8295-46aeae38a59c	mech000	4/7/23 13:36	الله يرحم والديكم صلحو المشاكل التقنية عندكم				en	sa	snb-mobile	If someone transfers money to me or I deposit money into my account, the amount does not show up in the application, so I cannot transfer, trade, or do anything with it. Although it is there, I have to go back to the ATM, check my account statement, and retrieve it.	ar	someone transfer money deposit money account amount show application transfer trade anything although go back atm check account statement retrieve	Neutral	App Store	0	1	0
App Store	1d1a8c4c-2d46-4d49-bbfc-1391e27db73f	""،،	4/7/23 13:25	..				en	sa	snb-mobile	Everything that was said has become worse than before.	ar	everything say become bad	Negative	App Store	1	0	0
App Store	91a2b278-a267-4463-9771-58d32bcb6347	Lol lmaaoo	4/7/23 12:52	😡				en	sa	snb-mobile	Every five seconds, there is a good update.	ar	every five second good update	Positive	App Store	1	0	0
App Store	a8793602-d643-41ec-9faf-4c4816bed02f	sahooma	4/7/23 12:52	التطبيق عندي متعطيل				en	sa	snb-mobile	Why does it ask for an app update every time you try to log in?	ar	ask app update every time try log	Negative	App Store	0	1	0
App Store	44dd5b18-54e1-42be-96f7-f0ddef111ed8	Jamilah m alshehri	4/7/23 12:15	اوفر صراحه				en	sa	snb-mobile	Something is constantly raising my blood pressure. Every time I see an update, I wonder how long the situation will remain like this.	ar	something constantly raise blood pressure every time see update wonder long situation remain like	Negative	App Store	1	0	0
App Store	0afc108f-71dc-4534-87fa-92ccf7fb1467	‏﮼آبوكيان	4/7/23 12:12	فيه مشكله بالدخول السريع				en	sa	snb-mobile	He says that she is in trouble and has been trying to solve it for six months.	ar	say trouble try solve six months	Negative	App Store	1	0	0
App Store	70abc297-253d-4a97-8b76-988f94254044	QwEr7465	4/7/23 10:58	فاشل				en	sa	snb-mobile	The worst application and most backward compared to the other banks. ðð»	ar	bad application backward compare bank	Negative	App Store	1	0	0
App Store	4e73636b-c510-4c7a-97d3-68ccf4c21b23	ايينز. ساما	4/7/23 10:19	تحديث				en	sa	snb-mobile	Every time an update, we get bored.	ar	every time update get bore	Negative	App Store	1	0	0
App Store	a59e5f27-21ce-4045-b248-151f024ecdf8	خررررااااا	4/7/23 6:02	ولعنه				en	sa	snb-mobile	May Allah take you, and your worthless, rotten app that has neither a good program nor a good bank. ðð	ar	may allah take worthless rotten app neither good program good bank	Negative	App Store	1	0	0
App Store	99434593-655c-4add-950e-05b1bb332bd9	1240000000000	4/7/23 4:02	التطبيق معلق				en	sa	snb-mobile	The application is frozen after the update and it does not open. All login attempts fail with an error. Please try again and here is the reference number. Please fix the problem urgently.	ar	application freeze update open login attempt fail error please try reference number please fix problem urgently	Negative	App Store	0	1	1
App Store	1778b788-8416-4261-8b55-210506f66dae	elsafwah	4/6/23 4:13	Makkah				en	sa	snb-mobile	The application has a problem, it downloads but does not open for a few days.	ar	application problem download open days	Negative	App Store	0	1	0
App Store	5bd5fbd0-8607-4b5b-8aef-5a38bfe2fbf8	saeed112	4/7/23 3:52	اشكاليه في موقع حسابت جميع الفواتير				en	sa	snb-mobile	Hello, After the latest update, all saved invoices in the application have been deleted. Please correct the issue or malfunction in the application.	ar	hello late update save invoice application delete please correct issue malfunction application	Negative	App Store	0	1	0
App Store	4bb9a482-8edf-4119-9f65-4961ecd457de	بيتو ادم	4/7/23 3:14	عملية الاهلي				en	sa	snb-mobile	An amazing application, but we hope to add a feature like a piggy bank to help us save the money we want to collect.	ar	amaze application hope add feature like piggy bank help us save money want collect	Positive	App Store	0	1	0
App Store	ee511a68-51b9-4a09-9c69-694972b52705	ibra_gh	4/7/23 3:02	فاشل وغير سلس				en	sa	snb-mobile	Unfortunately, your bank, Blue Neighbor, surpasses you by light years. Unfortunately, you force me to update so that I can log in! IT must be highly professional and develop the application. What is happening now is child's play and it diminishes the quality of the service provided by you.	ar	unfortunately bank blue neighbor surpass light years unfortunately force update log must highly professional develop application happen childs play diminish quality service provide	Negative	App Store	1	0	0
App Store	6994fa07-43b7-4d96-ba54-f8c25334382c	3moory_~	4/7/23 2:00	اسوء بنك في السعوديه				en	sa	snb-mobile	Bad bank and its service is garbage.	ar	bad bank service garbage	Negative	App Store	1	0	0
App Store	a8984757-8328-4d7b-a4c1-86519ae85005	galbalwalah	4/7/23 1:32	تطبيق ثقيل ولا يغني عن الموقع				en	sa	snb-mobile	I hope for its development, especially leasing finance.	ar	hope development especially lease finance	Positive	App Store	1	0	0
App Store	ac462a34-7518-45a7-84a0-c7bf38fb4baf	ER0987ert	4/7/23 0:37	تطبيق رائع				en	sa	snb-mobile	The bank is very beautiful and wonderful, and its services are great. The application is excellent; a bank in the palm of your hand. Thank you, Al Ahli Bank, from the bottom of my heart. Thanks to all the employees in this sector for the development, speed of service, and achievement. â¤ï¸ðððâ¤ï¸	ar	bank beautiful wonderful service great application excellent bank palm hand thank al ahli bank bottom heart thank employees sector development speed service achievement	Positive	App Store	0	0	0
App Store	0f8706b3-ea43-4de0-8ad4-315f06e7af29	مطر -	4/7/23 0:28	كل مافتحت البرنامج لازم تحديث!!				en	sa	snb-mobile	Every day an update to the software.	ar	every day update software	Neutral	App Store	0	1	0
App Store	03740fc5-bff7-4666-9bba-7eca413b3f7a	روق حمد محمد	4/7/23 0:16	ش				en	sa	snb-mobile	Program fail	ar	program fail	Negative	App Store	0	1	0
App Store	acc171d3-a0ee-4560-9445-b6af573c231f	Salman B Alhajji	4/6/23 23:45	مشكلة في التشغيل				en	sa	snb-mobile	The program does not work. The logo appears and does not disappear. It remains stuck on the logo and I can't do anything.	ar	program work logo appear disappear remain stick logo cant anything	Negative	App Store	0	1	1
App Store	33550b46-0a85-422b-8ddb-ae5b5a5997d6	خلود٤٤٤	4/6/23 23:41	أسوء تطبيق				en	sa	snb-mobile	One wastes their time just updating your application. It would be great if we see improvement and development.	ar	one waste time update application would great see improvement development	Neutral	App Store	1	0	1
App Store	cad29b3c-9643-4331-963c-d77e568176a8	cfoesjpewf	4/6/23 22:13	فاشل				en	sa	snb-mobile	The worst for more than 6 months, the worst program in all banks.	ar	bad months bad program bank	Negative	App Store	1	0	0
App Store	141a81d5-9497-4e6a-bdb3-e823fe6c57d2	Rada12309	4/6/23 14:01	لا استطيع التحديث!!				en	sa	snb-mobile	The program does not take place on April 6th.	ar	program take place april th	Neutral	App Store	0	0	0
App Store	fe0d8307-ce4a-40b9-bb08-0d23cabb07d1	ما تعشيت	4/6/23 13:16	تقييم				en	sa	snb-mobile	The worst bank in its services and dealings.	ar	bad bank service dealings	Negative	App Store	1	0	0
App Store	97beff2f-1072-4643-bc30-eb5a39925c5e	ManaL8776	4/6/23 12:24	تحديث سئ				en	sa	snb-mobile	The new update is bad, my personal funding disappeared.	ar	new update bad personal fund disappear	Negative	App Store	1	1	0
App Store	f014b0a6-908d-4b17-a7c5-766ba07c12bd	جلاميد غامد	4/6/23 8:35	تحديثات كثيرة				en	sa	snb-mobile	Almost every week there is an update, and I swear it's the worst application, unfortunately. I wish the updates would benefit us in something.	ar	almost every week update swear bad application unfortunately wish update would benefit us something	Negative	App Store	1	0	0
App Store	e0d32855-17fd-4960-9f55-a8a05357ce6c	يعلق ومو راضي يفتح	4/6/23 5:50	يعلق ومو راضي يفتح عندي				en	sa	snb-mobile	It's hanging and not opening for three days.	ar	hang open three days	Negative	App Store	0	1	1
App Store	907049da-0ebb-4800-9361-8209d5f5114f	shamikinani	4/5/23 23:43	لا يعمل.				en	sa	snb-mobile	Since the new update was released, the application does not work. It just hangs on a green screen. It is not compatible with iOS 12.5.7 and older versions. A solution must be found.	ar	since new update release application work hang green screen compatible ios old versions solution must find	Negative	App Store	0	1	1
App Store	f8853e55-c4e9-464b-931a-69f202ebafe2	بسررررعه	4/5/23 23:30	حل عاجل				en	sa	snb-mobile	Your latest update does not open on iPhone 6. Please provide a quick solution to the problem.	ar	late update open iphone please provide quick solution problem	Negative	App Store	0	1	0
App Store	72ebaabe-3b64-43e5-9c0c-44628ccdc2f5	فهد-	4/3/23 23:55	جازان				en	sa	snb-mobile	There is a technical problem in the application, personal financing options are not appearing in the application.	ar	technical problem application personal finance options appear application	Negative	App Store	0	1	0
App Store	598faae6-f548-4859-b99f-a861257f02e5	H.masoudi	4/5/23 21:17	التطبيق معطل				en	sa	snb-mobile	It is not working after the update.	ar	work update	Negative	App Store	0	1	0
App Store	7da5b9a3-e2d4-41a5-ae7b-588771ccc140	ابذ	4/5/23 21:10	اسواء تطبيق اتعامل معه واخس بنك البنك الاهلي تطبيق سئ جدا				en	sa	snb-mobile	To, for, or belongs to.	ar	belong	Neutral	App Store	0	1	0
App Store	4e7a2dc3-c3a6-4d98-afaa-0255f793eea6	شكرا شكرا شكرا الراجحي	4/5/23 13:31	لايصلح هذا التطبيق				en	sa	snb-mobile	The reason is that you have to update every day and I am busy. Thank you.	ar	reason update every day busy thank	Neutral	App Store	1	0	0
App Store	aacde72d-4990-4aa2-802d-057796e83199	fjiuyfyt55	4/4/23 23:24	سيء				en	sa	snb-mobile	Poor customer service	ar	poor customer service	Negative	App Store	1	0	0
App Store	52ba7042-9d7e-41c7-9aba-b57ecbab2ec3	hamzaahmed101	4/4/23 18:12	مشاكل التطبيق				en	sa	snb-mobile	The number of updates for the application is terrifying. It has been more than 6 months and the application has daily updates from 12 midnight until 4 in the morning. You cannot use the application during the update.	ar	number update application terrify months application daily update midnight morning use application update	Negative	App Store	1	1	0
App Store	696b5737-5562-4bcb-ad07-ce7c0fcfd233	الاهلي زبال	4/4/23 16:33	ً				en	sa	snb-mobile	Garbage	ar	garbage	Negative	App Store	1	0	0
App Store	b41f36cf-8448-40c5-9ab3-43f2978d1537	Asmmmr	4/4/23 16:27	تعليق على اللوقو				en	sa	snb-mobile	After the latest update, the application does not open and gets stuck on the logo page. Please fix the problem. Thank you. I have contacted all the communication channels, including the unified number and the website chat. Unfortunately, there is no solution. They suggested uninstalling the program and downloading it again, but this did not work. The ones who mentioned updates starting after half…	ar	late update application open get stick logo page please fix problem thank contact communication channel include unify number website chat unfortunately solution suggest uninstalling program download work ones mention update start half hour suggestions solution	Negative	App Store	0	1	1
App Store	80792b84-b41f-484e-b28d-7011a57d1baf	168888.()	4/4/23 16:12	صلحو تطبيقكم				en	sa	snb-mobile	The application is not working, it is not opening. I want to contact technical support for it.	ar	application work open want contact technical support	Negative	App Store	0	1	0
App Store	2c95903d-36af-44de-9bda-5a579a4fa86b	محمد الجميلي	4/4/23 14:49	تحديث فاشل				en	sa	snb-mobile	The application has become delayed in showing the actual amount in the account when depositing or withdrawing.	ar	application become delay show actual amount account deposit withdraw	Negative	App Store	0	0	1
App Store	916a78c8-d5d8-424e-9db8-6af4a4e0e9a9	am d70m	4/4/23 12:02	ابغى تبسيط خدمة..				en	sa	snb-mobile	How do I insert the card after renewing Apple Pay on the wallet? I have searched but have not found it.	ar	insert card renew apple pay wallet search find	Neutral	App Store	0	1	0
App Store	ff942711-ae12-478d-b689-6d911c3a94a5	afnaanart	4/4/23 9:33	....				en	sa	snb-mobile	The program is not opening after I updated it yesterday. What is the solution?	ar	program open update yesterday solution	Negative	App Store	0	1	0
App Store	3210c1d2-f412-44d9-80d3-06459896508e	fransibank	4/4/23 2:32	أحسن ملحوظ في الأداء التكنولوجي				en	sa	snb-mobile	The application is developing well after the merger with Samba, but it still lacks effective user engagement.	ar	application develop well merger samba still lack effective user engagement	Negative	App Store	1	0	0
App Store	b126993e-b792-48d7-b82a-722f497b7307	Y7-Y7	4/4/23 1:52	ياليت تستفيدون من تطبيق بنك الراجحي				en	sa	snb-mobile	The updates have increased until now for the Al Ahli Bank application, yet it is impossible for it to become my first application for financial transactions, both as a personal or commercial user.	ar	update increase al ahli bank application yet impossible become first application financial transactions personal commercial user	Negative	App Store	0	1	0
App Store	b72c84c7-9e94-4a58-a67f-c186655afe33	مستخدم للبنك الاهلي	4/4/23 0:43	بنك الاهلي				en	sa	snb-mobile	The application and the bank have unfortunately become worse and worse! It used to be better.	ar	application bank unfortunately become bad bad use good	Negative	App Store	1	0	0
App Store	a2d3bd40-773d-4d30-b447-f3571e66b705	NJOOD71	4/3/23 23:00	اقعط بنك				en	sa	snb-mobile	I consider it a means of sending and receiving transfers. It has no benefit in terms of promotions, services, or offers. I got a prepaid Mastercard from them and loaded it with 500. I tried to make payments with it, but all of them are pending. I contacted support and they said it would be resolved in two days, but now it's the second week and my balance is negative. It's the worst.	ar	consider mean send receive transfer benefit term promotions service offer get prepay mastercard load try make payments pending contact support say would resolve two days second week balance negative bad	Negative	App Store	1	1	0
App Store	2ef2369a-74fe-43ec-b5f1-45c1974f4420	اااااااالاااااسسسسس	4/3/23 21:55	مافتح معي التطبيق				en	sa	snb-mobile	I hope you do not require a specific update because it did not work for me. I have to update my mobile phone, but if I update it, I will lose half of what is on it. This is a banking application, why is a specific update necessary? It should be accessible to everyone.	ar	hope require specific update work update mobile phone update lose half bank application specific update necessary accessible everyone	Negative	App Store	1	0	0
App Store	52ea9781-7dbd-4e8c-98dd-4ba90369429e	AbdulazizAlyousef	4/3/23 20:11	تطبيقهم سيء جداً				en	sa	snb-mobile	Their application is very bad and there is exploitation in the transfer rates. Al Rajhi application is much better than them by leaps and bounds!	ar	application bad exploitation transfer rat al rajhi application much good leap bound	Negative	App Store	1	0	0
App Store	aa2ed154-4b7c-4e67-8d8a-7fcb73fee0a3	Anaaaaaa121	4/1/23 12:47	مشكله				en	sa	snb-mobile	The update did not work; it was not an upgrade to the previous program. Instead, it moves from the old program to the App Store to open the new one each time. Why don't you update the program and upgrade it instead of switching between two versions, especially considering that the latest version is excellent?	ar	update work upgrade previous program instead move old program app store open new one time dont update program upgrade instead switch two versions especially consider late version excellent	Negative	App Store	0	1	0
App Store	8f27c707-ef2a-450a-8acf-7df255ec9cb2	البوبلي	4/3/23 20:03	لايعمل على الايفون ٦ و ٧				en	sa	snb-mobile	Does not work on iPhone 6 and 7.	ar	work iphone	Negative	App Store	0	1	0
App Store	174b74d2-187e-4be3-aaaa-7d2c25f1a273	Mbs10000000000000	4/3/23 19:38	مشاكل الخدمة كثيرة				en	sa	snb-mobile	Services should be added and their availability should be confirmed.	ar	service add availability confirm	Neutral	App Store	0	1	0
App Store	941f048b-42e7-48a1-b172-44681bdeda7f	h.s.a26	4/3/23 18:52	كل دقيقه مسوين تحديث وماتقدر تدخله لين تحدث				en	sa	snb-mobile	The updates.	ar	update	Neutral	App Store	0	1	0
App Store	c035c0ee-e65f-4433-9500-a9aa497149d2	Rimaqs	4/3/23 18:27	Rima				en	sa	snb-mobile	Every time I download the program and try to log in to my account, it says that this device is unrecognized! Why do I have to go through the steps again and verify my device on the application every time? I hope you can fix this problem because it is really annoying.	ar	every time download program try log account say device unrecognized go step verify device application every time hope fix problem really annoy	Negative	App Store	1	0	0
App Store	0592fe3b-2229-4a0d-906f-ce3cbb8dc981	usuxhx	4/3/23 11:48	.				en	sa	snb-mobile	The application is bad, it needs development according to the updates it receives. I don't see any benefit in it. I wish there was an option to change the number instead of going to the banks and getting into trouble, even the ATMs don't allow me to change the number associated with my bank account.	ar	application bad need development accord update receive dont see benefit wish option change number instead go bank get trouble even atms dont allow change number associate bank account	Negative	App Store	1	1	0
App Store	aeb5519f-9979-4359-a522-d6952f203b93	waham9980	4/3/23 0:58	للأسف				en	sa	snb-mobile	Unfortunately, I spent a month trying to renew my documents through the application, but it wasn't working. I had to travel to another city to renew it. In the city of Al-Baha, there is no financial institution, and your application is also not functioning properly. Your updates are very poor.	ar	unfortunately spend month try renew document application wasnt work travel another city renew city albaha financial institution application also function properly update poor	Negative	App Store	1	1	0
App Store	c83179ea-f920-4269-b95e-fc48bd4ab062	sazqxx	4/3/23 0:00	احمد المطيري				en	sa	snb-mobile	I'm saying, you update a lot. I have 100 million, do you want me to spend it on you?	ar	im say update lot million want spend	Neutral	App Store	0	1	0
App Store	af137e81-f66e-4207-a606-3d79b3e554b2	soonhasan	4/2/23 13:51	بنك فاشل				en	sa	snb-mobile	And incompetent employees	ar	incompetent employees	Negative	App Store	1	0	0
App Store	d4a64ff1-d41d-411f-bce7-7a7e183a84e0	Abusaud١٢١	3/30/23 14:33	لا تعليق				en	sa	snb-mobile	No comment.	ar	comment	Neutral	App Store	0	1	0
App Store	64e48fcc-c245-451f-a8c2-0eea49c49933	Sultanahxoxo	3/28/23 23:40	تعبت كل شوي ابديت !				en	sa	snb-mobile	A lot of updates ð­	ar	lot update	Neutral	App Store	0	1	0
App Store	4a91bf43-d628-453f-aa0a-f6c30db872a2	ابو افر	3/30/23 10:22	بخصوص تطبيق الاهلي				en	sa	snb-mobile	The application is frozen and does not accept the update.	ar	application freeze accept update	Negative	App Store	0	1	1
App Store	6c5ccd37-3b00-4a99-8b72-854a07e21303	اابو ماالك	3/30/23 9:24	أبو مالك @				en	sa	snb-mobile	Unfortunately, the application is the worst and the banking services are terrible. The account was frozen on Thursday, the last working day, and updating through the application is also unsuccessful. It is necessary to visit the branch, noting that updating was done before without any benefit.	ar	unfortunately application bad bank service terrible account freeze thursday last work day update application also unsuccessful necessary visit branch note update do without benefit	Negative	App Store	1	1	1
App Store	3702cae4-c1f5-4cfc-a3b1-f3d67f5a7e66	aslllliihhhsjjsbsj	3/30/23 5:31	البنك				en	sa	snb-mobile	Everything they talked about doesn't work for me anymore, and no one knows what the problem is. I have to wait until they release a new update for it to work with me. There is a problem every time, even with transactions.	ar	everything talk doesnt work anymore one know problem wait release new update work problem every time even transactions	Negative	App Store	0	1	0
App Store	488dab4d-92ae-478d-a031-9a3f8989c243	mamamamanamamananana	3/29/23 12:29	فاااشله				en	sa	snb-mobile	The application is rubbish. It is a waste of time in terms of banking services.	ar	application rubbish waste time term bank service	Negative	App Store	1	0	1
App Store	0e2489e4-7818-481c-9e3f-7dab6357ee66	janobii00	3/27/23 19:47	.				en	sa	snb-mobile	The application is beautiful and needs modern development and easy addition of more services such as offers with partners, as well as adding rewards or points for customers.	ar	application beautiful need modern development easy addition service offer partner well add reward point customers	Positive	App Store	1	0	0
App Store	dbaf2be9-4ed1-4315-94ef-58d2d0664d8c	الي هوو	3/28/23 5:20	تطبيق الاهلي مع الاسف فاشل لمى تتصل فيهم كنترول ماااش يستوش تفكيرك				en	sa	snb-mobile	Unfortunately, the worst with the worst service.	ar	unfortunately bad bad service	Negative	App Store	1	0	0
App Store	ff9dd0a8-bc58-4d6a-94e4-669a4aaebff5	H.0707	3/27/23 20:38	الاهلي				en	sa	snb-mobile	I swear to God, it's not fair. I activated my account today, so why do I have to wait 48 hours to transfer? It's like I have to be idle for two days, that's not right. I hope you create a new update and solve this issue.	ar	swear god fair activate account today wait hours transfer like idle two days thats right hope create new update solve issue	Negative	App Store	0	1	1
App Store	2ba0da33-2de4-4917-9f73-bbb6db58fe46	صبراً	3/27/23 12:59	كثرة التحديثات				en	sa	snb-mobile	Every time we open the application, it asks for an update. We haven't seen all these updates except with you guys only. It would be better if there was only one update per year or every six months, not every two weeks an update.	ar	every time open application ask update havent see update except guy would good one update per year every six months every two weeks update	Negative	App Store	0	1	0
App Store	7d0654b0-24cd-4906-8355-68b36caac883	عبدالله الثريا	3/24/23 7:35	التطبيق لايعمل عندي				en	sa	snb-mobile	The application is not working for me.	ar	application work	Negative	App Store	0	1	0
App Store	0ad4f2d8-2475-403c-b916-5352f8c6f927	عميل لدى البنك	3/23/23 23:05	شكوى البنك الاهلي				en	sa	snb-mobile	Non-compliance as a request to update the national ID through the application.	ar	noncompliance request update national id application	Neutral	App Store	1	1	0
App Store	734193ab-aeaa-4dff-b563-7fcb3d783370	MAJED ;)	3/14/23 20:41	يحتاج تطوير				en	sa	snb-mobile	The application has improved since its launch, but it needs attention and development in: 1. The credit card balance does not update instantly. 2. There is no information about program points for you.	ar	application improve since launch need attention development credit card balance update instantly information program point	Negative	App Store	0	1	0
App Store	ec5d4feb-01a1-4575-88a2-1cf052a5dc1f	pqbdyal173hs	3/22/23 12:03	تحديثات كثيرة				en	sa	snb-mobile	"Every two weeks, the situation is updated once and it becomes clear."	ar	every two weeks situation update become clear	Neutral	App Store	1	0	0
App Store	51a5b900-4219-4fec-a27c-ec0fd6513380	fadia4	3/21/23 3:06	مؤسف				en	sa	snb-mobile	Honestly, it is really annoying that they release updates every now and then. The updates take a month or two to complete, and then they release a new update.	ar	honestly really annoy release update every update take month two complete release new update	Negative	App Store	1	0	1
App Store	676f3654-a867-44cd-a9f3-8904b07132f9	ابوعاصم 1992	3/20/23 22:06	تحديث فاش				en	sa	snb-mobile	The application is not working and it keeps crashing.	ar	application work keep crash	Negative	App Store	0	1	0
App Store	fbcf0bce-888a-4813-985c-d6adb1265bfe	Aramoh	3/19/23 17:40	ممتاز				en	sa	snb-mobile	Wonderful application and always evolving, thank you.	ar	wonderful application always evolve thank	Positive	App Store	0	0	0
App Store	07a260bd-11e8-447b-a6ab-b8a79dab2eb4	Itti13ksa	3/18/23 5:15	لا يعمل				en	sa	snb-mobile	The application is not working properly, I can't login.	ar	application work properly cant login	Negative	App Store	0	1	0
App Store	024f58fb-2878-46d8-a5b2-28ec335f0548	Mmmmm97m	3/16/23 21:26	تطبيق سيء جدًا				en	sa	snb-mobile	The application is very bad and inefficient, especially after midnight. It crashes a lot and has many malfunctions.	ar	application bad inefficient especially midnight crash lot many malfunction	Negative	App Store	1	1	1
App Store	0d4b3235-4144-403f-8b4b-d4eb61241db4	شيير	3/16/23 2:16	حلو				en	sa	snb-mobile	Nice	ar	nice	Positive	App Store	0	0	0
App Store	ac6bb3fc-57f0-4c63-b45c-c4648396835e	yosefalhwety	3/15/23 18:18	فاشل				en	sa	snb-mobile	After the update, the application does not open.	ar	update application open	Neutral	App Store	0	1	0
App Store	fdb8b41f-241c-43a7-ba59-0536d21e3791	ابونواف22222	3/15/23 17:18	لا رقيب ولا حسيب				en	sa	snb-mobile	These banks have no control. They are causing us endless suffering. Citizens are dying in their hands, becoming impoverished, hungry, and their children are being destroyed because of them.	ar	bank control cause us endless suffer citizens die hand become impoverish hungry children destroy	Negative	App Store	1	0	1
App Store	dde24990-c70a-489a-83b1-77e0f491823c	justtoly	3/15/23 17:08	..				en	sa	snb-mobile	There's no one like you in the whole world ð a great love.	ar	theres one like whole world great love	Positive	App Store	0	0	0
App Store	d0413ef5-1a8b-41cb-a36c-fe6a36c51ddc	mahmood511	3/15/23 14:29	تطبيق. لا يعمل				en	sa	snb-mobile	After updating, the application no longer works.	ar	update application long work	Negative	App Store	0	1	0
App Store	c8e1ceab-1342-47aa-8366-968a27785725	المستشاز	3/15/23 11:50	سيئ				en	sa	snb-mobile	The application is very bad and has many malfunctions. The old application is better.	ar	application bad many malfunction old application good	Negative	App Store	1	1	0
App Store	071c1ca0-0f86-460e-b7f3-6ff57c62c1f0	gozemarya	3/15/23 11:07	التطبيق معطل				en	sa	snb-mobile	The application does not work with the latest update, please review the numerous updates as they are harmful.	ar	application work late update please review numerous update harmful	Negative	App Store	1	1	0
App Store	a1c5ee5e-bb67-49cc-bf74-9b08c365a25e	linux syria	3/15/23 8:12	تطبيق ولا بهلله				en	sa	snb-mobile	God does not bless you, I have been trying for two hours and you won't let me in. Finally, you blocked me and asked me to enter from the back entrance, but still you won't let me into the account. God is sufficient for me, and He is the best protector against you.	ar	god bless try two hours wont let finally block ask enter back entrance still wont let account god sufficient best protector	Negative	App Store	0	1	0
App Store	f8a1dce3-38b8-406d-823e-ce44ce42bce3	اتُ	3/15/23 7:55	سيئ				en	sa	snb-mobile	It doesn't work.	ar	doesnt work	Negative	App Store	0	1	0
App Store	a350a4ab-5af1-4d5c-92a6-757eccc0bfe2	Passy8675	3/15/23 4:59	كذب على كذب على كذب				en	sa	snb-mobile	"They pay money to robots to give them 5-star ratings and write stories for them from their own imagination. I didn't expect this from you, you liars. It's clear from the names and English language. English is my first language, ugh you irritated me."	ar	pay money robots give star ratings write stories imagination didnt expect liars clear name english language english first language ugh irritate	Negative	App Store	1	0	0
App Store	730f6751-385d-46e9-b474-ccf5704bd49c	ابو صالح ًًًًً	3/14/23 21:41	ً				en	sa	snb-mobile	The worst, every day updates.	ar	bad every day update	Negative	App Store	1	0	0
App Store	b0eda924-57dc-4e1d-aef1-2ead0392f01e	d44v	3/14/23 19:28	التطبيق يغلق فورًا عند التشغيل				en	sa	snb-mobile	When opening the application, it immediately closes after the latest update on March 14th. I hope you resolve the issue.	ar	open application immediately close late update march th hope resolve issue	Neutral	App Store	0	1	0
App Store	9087ffa8-eaba-4172-926b-0c981e34cd06	agijvdtllvggh	3/14/23 17:53	خلل فني				en	sa	snb-mobile	When requesting to renew the form and selecting the baptism in the text message, an error message appears and the process cannot be completed.	ar	request renew form select baptism text message error message appear process complete	Negative	App Store	0	1	0
App Store	b26f6653-3f4d-4f9a-9267-d65f61e2c328	مرام asd	3/14/23 19:22	لو في اقل من نجمه كان حطيتها				en	sa	snb-mobile	Al-Ahli Bank is going from bad to worse. Why is there a daily update for the application? This exposes it to potential breaches. If there were no vulnerabilities, it wouldn't be susceptible to fraudsters.	ar	alahli bank go bad bad daily update application expose potential breach vulnerabilities wouldnt susceptible fraudsters	Negative	App Store	1	1	0
App Store	ad6c9eca-fb09-4219-85c6-55b49fd7114c	js29655	3/14/23 19:11	اسوء تطبيق				en	sa	snb-mobile	"This banking application is more of a burden than a benefit."	ar	bank application burden benefit	Negative	App Store	1	0	0
App Store	d7850fea-9acc-4a4b-8a9b-33017159469d	Rinaz90	3/14/23 15:04	مراجعه				en	sa	snb-mobile	The interface has developed and the application is smooth ðð¼ðð¼	ar	interface develop application smooth	Positive	App Store	0	0	0
App Store	f3081adb-d367-40ad-b95d-bcc3b6d37bc9	جوجو الشرير	3/14/23 16:29	عدم وجود كشف حساب في التطبيق				en	sa	snb-mobile	The absence of an account statement in the application	ur	absence account statement application	Neutral	App Store	0	1	0
App Store	41cba648-fc34-4a50-bea3-6dd4d3ef63ef	Yassrzoom76	3/14/23 15:23	دخلت على صفحتي				en	sa	snb-mobile	I entered my account and entered my employment data as soon as I opened the account. Now, when I try to modify it, it refuses. Why hasn't the account been updated with my correct information?	ar	enter account enter employment data soon open account try modify refuse hasnt account update correct information	Neutral	App Store	0	1	0
App Store	80e4bc9d-1723-45cd-bee7-729c6c7252d0	رحووبه	3/14/23 7:57	تطبيق عظيم				en	sa	snb-mobile	Thank you for your prompt response and the variety of services provided. It has made my life easier. I genuinely thank you from the bottom of my heart. â¤ï¸ð«¶ð½ðð¥¹	ar	thank prompt response variety service provide make life easy genuinely thank bottom heart	Positive	App Store	0	0	0
App Store	47452303-815d-4c10-8370-fc8f9eeb4b0a	ss470	3/14/23 10:59	تراجع في خدمات الاهلي				en	sa	snb-mobile	Honestly, every time I update the application, it only gets worse and weaker.	ar	honestly every time update application get bad weak	Negative	App Store	1	0	0
App Store	608b7328-bb69-4648-9cff-ce529d8601b6	ه،ن،و.	3/14/23 8:58	مشكلة عدم التحويل				en	sa	snb-mobile	The application is currently unable to execute any transfers due to the disappearance of the transfer options after clicking on the transfer options.	ar	application currently unable execute transfer due disappearance transfer options click transfer options	Negative	App Store	0	1	0
App Store	755ed32c-d45b-4cc5-abaf-427322139617	Abu Riyan	3/14/23 8:45	ABHA				en	sa	snb-mobile	Why was the addition of Maestro card to Apple Pay cancelled from the application?	ar	addition maestro card apple pay cancel application	Neutral	App Store	0	1	0
App Store	c52131b2-6fee-464a-a3db-c3f6b7379fa7	سعد علوش المقاطي	3/11/23 23:01	لا استطيع التحمييييل				en	sa	snb-mobile	The worst application	ar	bad application	Negative	App Store	1	0	0
App Store	a9158f46-2797-4c2c-a320-0136c11e944b	zxcxvnmsvdhejevv	3/10/23 18:38	تطبيق سيء				en	sa	snb-mobile	This application is very, very bad. There are many complaints, if there was a negative rating, I would have given it more.	ar	application bad many complaints negative rat would give	Negative	App Store	1	0	0
App Store	668f1679-ddd6-4b6d-bf81-48c207cabd28	بو عزام الى الابد	3/10/23 15:52	تم اخفاء خيار اضافة البطاقة الى apple wallet				en	sa	snb-mobile	The option to add the card to Apple Wallet has been hidden.	ar	option add card apple wallet hide	Neutral	App Store	0	1	0
App Store	bf323d00-97c9-4e8b-be69-be693e0e7e73	zdahen4	3/8/23 21:05	البرنامج ثقيل وفاشل				en	sa	snb-mobile	The program is very bad, very bad.	ar	program bad bad	Negative	App Store	1	0	0
App Store	9d51e842-9c2c-4446-bf7d-356c010f1e44	استبدال البنك باخر	3/6/23 3:13	الشكوى لله				en	sa	snb-mobile	I keep getting a login restriction, why? How many times have I deleted and reinstalled the app only to have the same problem? What should I do with this app if it doesn't benefit me? I have to go back to the bank since it's not helpful, and there are many complaints, it's better to delete it.	ar	keep get login restriction many time delete reinstall app problem app doesnt benefit go back bank since helpful many complaints good delete	Negative	App Store	0	1	0
App Store	c8b866bb-f59a-417b-b3e9-c257eef50d6b	feridun:)	3/5/23 14:46	تطبيق خايس				en	sa	snb-mobile	I cannot open the account, I am unable to change the password, and customer service does not respond to me. Even the automated response system was not helpful to me.	ar	open account unable change password customer service respond even automate response system helpful	Negative	App Store	0	1	0
App Store	d3404c1c-2602-4a81-beb7-1646180ca0e1	خالد الحدادي	3/4/23 21:30	يعلق				en	sa	snb-mobile	If I try to transfer money to someone or try to transfer from one personal account to another, it takes time, gets delayed, and sometimes it doesn't work out.	ar	try transfer money someone try transfer one personal account another take time get delay sometimes doesnt work	Negative	App Store	0	0	1
App Store	4d81a104-6868-4c04-b462-6a7f4aae48c7	1ادب	3/4/23 13:31	ليش مايدعم 16.3				en	sa	snb-mobile	"Lish" translates to "why" in English.	ar	lish translate english	Neutral	App Store	0	1	0
App Store	96d62183-931c-4396-8f66-c3bfdda73da1	Talalsnb	2/28/23 23:22	Always out of service!!!				en	sa	snb-mobile	A very, very bad application! I admit there are many diverse services that meet the user's needs, but most of the time the application doesn't work. Whenever you want to transfer money, you get a message saying "Something went wrong." Or when you want to pay a bill, the same message appears. Oh, how frustrating it is! Samba Bank, you have caused me so much suffering. ð This wasn't the experien…	ar	bad application admit many diverse service meet users need time application doesnt work whenever want transfer money get message say something go wrong want pay bill message appear oh frustrate samba bank cause much suffer wasnt experience expect	Negative	App Store	1	1	0
App Store	c3906c42-b105-4c81-ba71-d952347fb635	ءءءءءءءءءءءهوا	3/1/23 0:25	اا				en	sa	snb-mobile	The worst and most unsuccessful application since yesterday, I want to transfer and it's not willing to transfer, neither my personal account nor my account outside Al-Ahli Bank. Find a solution for yourselves.	ar	bad unsuccessful application since yesterday want transfer will transfer neither personal account account outside alahli bank find solution	Negative	App Store	1	1	0
App Store	5e65ef53-2151-422d-bb2a-afa5499475ae	منتقد ايجابي	2/23/23 5:55	جيد و لكن				en	sa	snb-mobile	Data update is not working.	ar	data update work	Negative	App Store	0	1	0
App Store	5648d1a0-6fc4-478b-bf81-400f22900be9	Maher khafay	2/28/23 17:58	تسجيل خروج				en	sa	snb-mobile	When logging into the account, it automatically logs out. I have tried with it many times.	ar	log account automatically log try many time	Negative	App Store	0	1	0
App Store	0cba7aea-e8c6-4fe8-a460-6780db93a746	gfdbgh	2/27/23 16:47	سيء جدا جدا جدا جدا جدا				en	sa	snb-mobile	The application updated and every time I enter, it redirects me to the App Store, telling me that there is a new update. I press "OK", but even after deleting and reinstalling the application, it's still not working. Seriously, fix your terrible application, it's causing so much trouble every Friday when they go offline and their application crashes.	ar	application update every time enter redirect app store tell new update press ok even delete reinstall application still work seriously fix terrible application cause much trouble every friday go offline application crash	Negative	App Store	1	1	0
App Store	3ef428b1-6e53-4b7b-a5b0-c26a31a9c592	روگـو	2/25/23 17:41	فاااااشل				en	sa	snb-mobile	The worst program, it's glitching, what's this?	ar	bad program glitching whats	Negative	App Store	1	1	1
App Store	afa451c3-3705-4284-affe-79f80d0b71a8	Ohood alshami	2/24/23 22:06	زفت				en	sa	snb-mobile	The bank is like garbage, look for a new update. It's unbelievable that from 12 to 4, I can't transfer or do anything. Take action.	ar	bank like garbage look new update unbelievable cant transfer anything take action	Negative	App Store	1	1	0
App Store	ed78b82a-1bf3-4d01-928d-6e8736d90639	ابو ياسر 715	2/24/23 13:35	ملاحظه على التطبيق				en	sa	snb-mobile	I would like to know the early repayment amount for all financing programs, and I hope to have the option of early repayment for those who wish to do so, similar to some other banking applications. Thank you.	ar	would like know early repayment amount finance program hope option early repayment wish similar bank applications thank	Positive	App Store	0	0	0
App Store	7682e037-9b1f-4bd6-82b9-b32a28d0d5a0	وذلحين كيف الطريقه!	2/16/23 12:22	في مشكله في تعيين الحساب الرئيسي				en	sa	snb-mobile	Please solve this issue. The problem is that the application assigns any account from your accounts as the main account. The second problem is that you cannot change the main account to the second one.	ar	please solve issue problem application assign account account main account second problem change main account second one	Negative	App Store	0	1	0
App Store	5c1a42d5-5ce4-4425-a12a-cd90b152159f	Mss.Raghad	2/22/23 20:57	التحديثات الأخيرة 👎🏻				en	sa	snb-mobile	The previous identity of the Ahli application was much more beautiful, easier to use, and better. The current update is very bad in terms of design and ease of use. I no longer recommend it, as the procedures and accessibility are no longer easy, which wastes the user's time. We hope to return to the old system because the current update is very bad and impractical.	ar	previous identity ahli application much beautiful easy use good current update bad term design ease use long recommend procedures accessibility long easy waste users time hope return old system current update bad impractical	Negative	App Store	1	0	0
App Store	d28b6b33-0ee9-441a-ad05-343185b94799	نودي2	2/21/23 22:02	البرنامج جدا سيئ				en	sa	snb-mobile	I transferred from another bank to my Al-Ahli bank. I received a message stating that the transfer was completed and the amount was deposited, but I am unable to use it. I have to wait until it appears in my account. If I go to the latest transactions, I can see the transfer.	ar	transfer another bank alahli bank receive message state transfer complete amount deposit unable use wait appear account go late transactions see transfer	Neutral	App Store	0	1	0
App Store	4191c51b-dbf0-4329-a173-7a8411bfcd12	سردام	2/21/23 9:47	بطاقة الائتمان				en	sa	snb-mobile	One of the best cards is Alahli Bank's. Always outstanding.	ar	one best card alahli bank always outstanding	Positive	App Store	0	0	0
App Store	bccedf44-843a-4336-9a62-e63acfb7b828	bekaso700	2/21/23 8:25	بنك سيء				en	sa	snb-mobile	This translates to: "This bank is terrible in terms of customer service and very slow. I only gave one star so that I can leave a comment, but it doesn't deserve it."	ar	translate bank terrible term customer service slow give one star leave comment doesnt deserve	Negative	App Store	1	0	1
App Store	6db2c989-cb94-42af-bf3b-0ca075dac828	ma9990	2/19/23 13:50	سيء جداً بعد الساعة 1ص التحويل يعلق				en	sa	snb-mobile	Very bad, after 1am the transfer gets stuck.	ar	bad transfer get stick	Negative	App Store	1	0	1
App Store	a86b7f2b-bd05-4a0f-8117-a92e60c0ce7c	abidalalyami	2/17/23 20:03	كشف حساب				en	sa	snb-mobile	I cannot get a bank statement. I used the smart device and requested a bank statement, then I received a code from Bank Al Ahli Mobile. However, when I tried to access the bank statement, I didn't succeed. I called the customer service phone number, but unfortunately, the employee was unhelpful and didn't provide me with any assistance. They told me to visit the nearest branch on Sunday!	ar	get bank statement use smart device request bank statement receive code bank al ahli mobile however try access bank statement didnt succeed call customer service phone number unfortunately employee unhelpful didnt provide assistance tell visit near branch sunday	Negative	App Store	0	1	0
App Store	22b5902f-dc07-4425-9f0c-321c3421d65c	ميمي ١٥	2/16/23 12:08	مشكلتي				en	sa	snb-mobile	The application needs maintenance in mobile recharge. I recharged my mobile with a Sawah card worth 100, but it did not reach me and the amount was deducted. I did not receive the recharge card on my phone. Please solve this problem.	ar	application need maintenance mobile recharge recharge mobile sawah card worth reach amount deduct receive recharge card phone please solve problem	Negative	App Store	0	1	0
App Store	d2a405e0-b610-4b48-ae7c-f105486d9540	كوكو كارلو	2/14/23 9:26	بس تكون عميل				en	sa	snb-mobile	Banks only care about you as a customer when they burden you with debts. You become at their mercy until the day of judgment. This is their policy.	ar	bank care customer burden debts become mercy day judgment policy	Negative	App Store	1	0	0
App Store	34bae719-8159-4cb3-8a9b-03a28cea0024	-----١-١-	2/12/23 15:31	اقسم بالله لو فيه اقل من نجمه حطيته				en	sa	snb-mobile	God is sufficient for me. The worst application that refuses to let me in for more than a month, and I've been trying.	ar	god sufficient bad application refuse let month ive try	Negative	App Store	1	1	0
App Store	14fcddbc-0bc9-4395-b10f-58ba30821668	دودينهو الانصاري	2/12/23 14:56	التطبيق لا يعمل				en	sa	snb-mobile	App commentator	ar	app commentator	Neutral	App Store	0	1	0
App Store	aa90f529-3725-4d04-baa4-ea570f02b16c	Feras Sarhan	2/12/23 12:55	مشكلة بالصفحة الرئيسة				en	sa	snb-mobile	Peace be upon you and the mercy and blessings of Allah. The application is updated to the latest version, and whenever I enter the application, it asks me to update and takes me to the App Store, and then the open icon appears instead of the update. I have deleted the application and reinstalled it, but the same problem persists. To be honest, I am tired of it to the point that I avoid entering t…	ar	peace upon mercy blessings allah application update late version whenever enter application ask update take app store open icon appear instead update delete application reinstall problem persist honest tire point avoid enter application	Neutral	App Store	1	1	0
App Store	b794fec7-5d53-41a6-b592-ebc866938047	خالد العقيدي	2/8/23 11:06	مشكلة في فتح التطبيق				en	sa	snb-mobile	When opening the application, a message appears indicating the presence of an update. However, when going to the store, there is no update available, only the word "open". Upon continuing to press "open" in the store, the application works properly. However, if the message indicating the presence of an update is ignored, despite the fact that there is actually no update, and logging in directly f…	ar	open application message appear indicate presence update however go store update available word open upon continue press open store application work properly however message indicate presence update ignore despite fact actually update log directly application application interface open correctly please pay attention solve problem	Neutral	App Store	0	1	0
App Store	29e8d346-a5f5-4b33-8f8e-a01cd2110685	loood530	2/11/23 18:56	اسواء تطبيق وخدمات لبنك ودايم معلق				en	sa	snb-mobile	"Wadiah Bank has the worst application and services, always causing delays."	ar	wadiah bank bad application service always cause delay	Negative	App Store	1	0	1
App Store	f744f247-4cc8-48bc-8f6b-3a0ca66ae2f3	البارق to	2/10/23 20:48	استفساررر				en	sa	snb-mobile	"I came to update my account and I was transferred to the automated system. It asked me for my card number, PIN, and verification code. What's the deal?"	ar	come update account transfer automate system ask card number pin verification code whats deal	Neutral	App Store	0	1	0
App Store	90178917-3599-4a41-86f4-b3fa495cb436	الشنقيطي البلاوي	2/8/23 13:18	تطبيق معقد				en	sa	snb-mobile	With all due respect to you, your application is complicated and I hope you make it a bit easier.	ar	due respect application complicate hope make bite easy	Neutral	App Store	1	0	0
App Store	40c1fadc-4c3e-4284-a81c-ad63e0aa1442	سالم٢٤٣٥	2/5/23 18:03	تحديث ممتاز				en	sa	snb-mobile	Alhamdulillah, after the update, my money increased in the account.	ar	alhamdulillah update money increase account	Positive	App Store	0	1	0
App Store	597eff11-df51-48f5-83ac-0e7d7259ae88	و…..	2/6/23 12:34	التطبيق لا يعمل…..!؟				en	sa	snb-mobile	The application is not working.....!?	ar	application work	Negative	App Store	0	1	0
App Store	e49bdf9e-9e28-43b8-9a1f-5314a5213440	--------::::::::	2/6/23 10:44	التطبيق القديم افظل				en	sa	snb-mobile	We are used to the old, and we know everything we need to develop this. By God, it is not wrong to improve and the best is always the first. Those who had clear debts, what happened to them and what remains.	ar	use old know everything need develop god wrong improve best always first clear debts happen remain	Positive	App Store	1	0	0
App Store	4d78914a-9b7f-4502-bb11-03af9c232eb2	الأمين السوداني	2/3/23 21:22	شكرًا جزيلا				en	sa	snb-mobile	Always outstanding... May Allah grant you success and support you.	ar	always outstanding may allah grant success support	Positive	App Store	1	0	0
App Store	01a13c38-d7a5-47e9-8ef8-f02b168552a2	انغام مطر	2/5/23 0:27	تطبيق سيئ				en	sa	snb-mobile	Every two days there is an update and I hope it includes something useful. The bank lacks many features in terms of security and technology. It used to be an amazing bank, but now it is far behind even smaller banks like Al-Nshaa and Al-Awwal.	ar	every two days update hope include something useful bank lack many feature term security technology use amaze bank far behind even small bank like alnshaa alawwal	Positive	App Store	1	0	0
App Store	15dbf0db-7c45-41f7-87cc-b8e851b26ec8	tyrho	2/4/23 23:08	خلل فني				en	sa	snb-mobile	In the recent times, the application has been slow. It's the first time I see someone transferring an amount without the balance changing.	ar	recent time application slow first time see someone transfer amount without balance change	Negative	App Store	0	0	1
App Store	4fad6cb6-788f-4778-b447-624a3eecfc44	nawaf7070	2/4/23 14:30	اسوء بنك				en	sa	snb-mobile	The worst application for services like people and anything else. You can't even view your card or view the numbers, let alone add them to the smart wallet! the worst application and the worst bank.	ar	bad application service like people anything else cant even view card view number let alone add smart wallet bad application bad bank	Negative	App Store	1	1	0
App Store	dfecbf44-9fe8-407e-b85a-f335df5e7b20	shflmhrs	2/4/23 14:22	عدم ربط التحديث بالدخول للتطبيق				en	sa	snb-mobile	I wish you wouldn't link the update to compulsory login sometimes. Sometimes it is necessary to make transfers, and the update may be delayed or take a long time. ð¤	ar	wish wouldnt link update compulsory login sometimes sometimes necessary make transfer update may delay take long time	Negative	App Store	0	1	1
App Store	2c6a0f4d-2a1c-4ae2-928b-7cb15fa99f03	احمد حمنو	2/4/23 14:16	التحديثات!!				en	sa	snb-mobile	The frequent updates are causing frustration, every time I want to use it in a hurry, the application prompts for multiple updates and you keep switching from one application to another. But, with the help of Allah, I will finish off my debts and close this bank, it's the worst experience.ðð¼	ar	frequent update cause frustration every time want use hurry application prompt multiple update keep switch one application another help allah finish debts close bank bad experience	Negative	App Store	1	1	0
App Store	ca3e5a29-79e8-4a58-a7e9-e9efa6076872	A_iiiz	2/4/23 9:47	سيئ				en	sa	snb-mobile	The worst bank application you can ever see in your life.	ar	bad bank application ever see life	Negative	App Store	1	0	0
App Store	6268a211-9601-4d4a-abb1-8e083c10c541	فاطمةةةةةةةةةةةةة	2/4/23 0:28	تقيمي				en	sa	snb-mobile	After 12 o'clock, it hangs and puts you in a tough spot, a predicament with no equal	ps	oclock hang put tough spot predicament equal	Negative	App Store	1	0	1
App Store	5958b381-1bd7-43f1-af52-ae39c11d46de	taz-xw	2/3/23 20:19	إضافة البطاقة				en	sa	snb-mobile	Since the application changed, I haven't been able to add my card to Apple Pay like before. I have searched a lot and couldn't find any solution. What should I do?	ar	since application change havent able add card apple pay like search lot couldnt find solution	Negative	App Store	0	1	0
App Store	72ad9cfe-cde6-4e87-90d4-cc5fc63abd7c	Rowa9	2/3/23 20:06	صلحو توثيق الاجهزه				en	sa	snb-mobile	Please, can you explain when you will fix the documentation of the devices? Al-Ahli is being blocked from using the phones because of your careless documentation. :)	ar	please explain fix documentation devices alahli block use phone careless documentation	Negative	App Store	1	1	1
App Store	b8ec2798-9e8e-4ad1-af8d-eb9581950f54	محمد ابن ابيه	2/3/23 10:39	أزق تطبيق				en	sa	snb-mobile	Wins the Azk Application Award	ar	win azk application award	Positive	App Store	0	1	0
App Store	73a50a3e-a659-4446-8644-9f7d81c2cfd5	أبوثنبان	2/3/23 5:04	كل يوم تحديث بشكل غير منطقي عطلني مرات عدة				en	sa	snb-mobile	I do not recommend using the application every day. Each time I update the application, I have to delete it and reinstall it in an illogical way.	ar	recommend use application every day time update application delete reinstall illogical way	Negative	App Store	1	0	0
App Store	6cae5355-a500-4417-ab17-07c1491a68ab	azez-97	2/3/23 2:01	Snb mobile				en	sa	snb-mobile	The application is bad, it freezes, and currently it doesn't open.	ar	application bad freeze currently doesnt open	Negative	App Store	1	1	1
App Store	6abc1ce2-8460-48fa-a89c-16e0d4de2cda	Miznan	2/2/23 17:45	تطبيق ينقصه الكثير				en	sa	snb-mobile	The application is still experimental or primitive, if the name is correct. The application lacks full support for screen readers for the visually impaired. It also lacks improvement in the fast login feature, and also lacks the ability to add bank cards to Apple Pay. There is no acceleration in development. Please prioritize this issue, thank you.	ar	application still experimental primitive name correct application lack full support screen readers visually impair also lack improvement fast login feature also lack ability add bank card apple pay acceleration development please prioritize issue thank	Negative	App Store	1	1	0
App Store	1fda20ad-f6d3-45fc-933b-f8872c26f403	GG Khaled	2/3/23 1:51	تطبيق خربان				en	sa	snb-mobile	I put the password, it hangs and doesn't let me in, greetings.	ar	put password hang doesnt let greetings	Negative	App Store	0	1	1
App Store	3e022f49-10e3-4744-af6c-44e2edd1f7b0	M+SH	2/2/23 22:07	تطبيق فاشل				en	sa	snb-mobile	I have a payment that I cannot transfer due to your constant comments, greetings, and interruptions!	ar	payment transfer due constant comment greetings interruptions	Negative	App Store	0	1	0
App Store	a9f1dee8-edcc-4ae7-8763-3f487237a50e	 cσNT -	2/2/23 19:42	طباعة كشف حساب				en	sa	snb-mobile	Unfortunately, until now, you cannot print an account statement in English through the application.	ar	unfortunately print account statement english application	Negative	App Store	1	1	0
App Store	0e7a9322-ab5e-4c22-8ab3-52c0cc596d04	دلال ..	2/2/23 17:35	.				en	sa	snb-mobile	We need a service to change the mobile number from the application.	ar	need service change mobile number application	Neutral	App Store	1	0	0
App Store	c3112d39-3689-44eb-a6b2-df911ba27340	noraaasaley	1/22/23 9:42	لايمكن كتابة الرقم السري كامل				en	sa	snb-mobile	There is a glitch in the update. Login does not allow more than 8 entries to be written. Therefore, it is not possible to login to the account.	ar	glitch update login allow entries write therefore possible login account	Negative	App Store	0	1	0
App Store	229d5e4e-7235-44d4-b0a8-44b0ad4c1782	ماميكينينينيرريهثابزقايز	2/2/23 15:55	َ				en	sa	snb-mobile	Excellent application in every sense of the word.	ar	excellent application every sense word	Positive	App Store	0	0	0
App Store	b381e248-01de-48b7-9111-65e9a0d24859	عكشان ٤	2/2/23 8:50	يوجد خلل في التطبيق				en	sa	snb-mobile	When I enter the application, it redirect me to the store. I open it from the store and enter the application, but the problem is I find an update that is useless, it's the same exact problem.	ar	enter application redirect store open store enter application problem find update useless exact problem	Negative	App Store	0	1	0
App Store	b8ec4456-f3a3-434e-96a5-d4237ed9f364	mem.x49	1/31/23 21:04	تطبيق سيء				en	sa	snb-mobile	The worst application in life, I mean, can you believe that from 12 attempts it can't even convert to my family's account? There's an update every now and then, but nothing changes except the appearance.	ar	bad application life mean believe attempt cant even convert familys account theres update every nothing change except appearance	Negative	App Store	1	1	0
App Store	e7d604fb-dad3-4327-a11f-45d38af0dd3e	aldossarisa	1/31/23 20:15	تطبيق بطيء				en	sa	snb-mobile	The application needs updating and development.	ar	application need update development	Neutral	App Store	1	0	0
App Store	0d903799-6ff7-4401-a78e-1830fcb275c6	ابوو نواف	1/31/23 20:02	والله انه اسوء تطبيق بنكي👎🏼👎🏼👎🏼				en	sa	snb-mobile	By Allah, it is one of the worst financial applications. It's so bad that the local transfer system closes at midnight. So if you try to transfer any amount to another bank account, you will receive a system error notification.	ar	allah one bad financial applications bad local transfer system close midnight try transfer amount another bank account receive system error notification	Negative	App Store	1	1	0
App Store	7b37a7ad-879f-4d36-8bef-a29339e6eefa	ahmed crispo	1/30/23 22:09	ممتاز				en	sa	snb-mobile	Excellent	ur	excellent	Positive	App Store	0	0	0
App Store	63ba2c23-bb3e-4466-a6e1-e0b4c72cb65b	ابو مشعل العصيمي	1/27/23 22:48	الرياض				en	sa	snb-mobile	Very bad services	ar	bad service	Negative	App Store	1	0	0
App Store	ea3d9d76-9991-4603-801a-bd5230d99698	ajcf9	1/26/23 4:51	من أسوء التطبيقات اللي استخدمتها				en	sa	snb-mobile	The application keeps freezing every now and then. After 1 AM, it only works forcefully with you. Many times, you can't transfer. You can't log in except with difficulty.	ar	application keep freeze every work forcefully many time cant transfer cant log except difficulty	Negative	App Store	0	1	1
App Store	84fc9d2e-e041-4825-a8f2-0d81f505e90d	سليمان شعفلي	1/24/23 20:52	مشاكل في التطبيق				en	sa	snb-mobile	The complexity is unreasonable. This application does not have Apple Pay integration. Additionally, adding a beneficiary requires selecting a number and waiting for a code to be sent to you. If the message is from the same number you are calling from, wash your hands before receiving the message while talking. In other words, it is very, very complicated. It is better to look for a bank other tha…	ar	complexity unreasonable application apple pay integration additionally add beneficiary require select number wait code send message number call wash hand receive message talk word complicate good look bank alahli	Negative	App Store	1	0	0
App Store	3c51bf35-a352-43c7-bcef-c2e1b32acff7	trad2524	1/23/23 12:41	تطبيق فاشل				en	sa	snb-mobile	The application is not working at all.	ar	application work	Negative	App Store	0	1	0
App Store	168a248e-27d9-432e-8cd0-2354e1c4948e	فارس تركي المطيري	1/22/23 10:29	ج				en	sa	snb-mobile	Very very very bad application	ar	bad application	Negative	App Store	1	0	0
App Store	e4d1526e-3b6a-4912-bde2-64975f0283fc	عبدالاله عع	1/21/23 1:20	التطبيق فاسل له شهور				en	sa	snb-mobile	The new application keeps prompting me to update from the Apple Store and takes me back again. The password requirements are frustrating. It only allows for 8 characters and no symbols. ð¡	ar	new application keep prompt update apple store take back password requirements frustrate allow character symbols	Negative	App Store	1	1	1
App Store	f3aa6d25-eae8-447a-b896-91c38f38e77e	Mackesha	1/15/23 14:05	التطبيق القديم كان أحسن بكثير				en	sa	snb-mobile	The new application is full of errors: sometimes it doesn't allow me to change the number format from Arabic to English during conversion, sometimes it gives me an error message when I try to recharge credit, and sometimes it gives me an error message when I try to transfer to a local account. We hope they fix these errors or bring back the old version of the application because it was much bette…	ar	new application full errors sometimes doesnt allow change number format arabic english conversion sometimes give error message try recharge credit sometimes give error message try transfer local account hope fix errors bring back old version application much good version	Negative	App Store	0	1	0
App Store	9d37b78e-f67b-43cd-9d78-11f49a0f55bb	فهد العنقري	1/19/23 13:42	تطبيق رائع بحلته الجديدة Great app in its new look				en	sa	snb-mobile	Great app in its new look.	ar	great app new look	Positive	App Store	0	0	0
App Store	e4ae0509-f553-4201-825e-4bd3541a5204	عبد العزيز محمد سعد	1/18/23 15:45	تجربة سيئة				en	sa	snb-mobile	Dear brothers, the application is not working for me. Every time I access it, I get a black screen, and I am exhausted from this situation. I went to the bank to get my card, so I can access the website and complete my transactions, but I cannot send a transfer to anyone. The service is very bad, and I am not satisfied with Al Ahli Bank. If I don't find a solution, I will switch to another bank. …	ar	dear brothers application work every time access get black screen exhaust situation go bank get card access website complete transactions send transfer anyone service bad satisfy al ahli bank dont find solution switch another bank honest currently financial crisis money account access transfer man fix car embarrass dont know really difficult situation go withdraw money tell contact bank	Negative	App Store	1	1	0
App Store	a70f8015-0054-4d26-9e94-5462d677021e	نون الشعد	1/18/23 4:13	بنك اهلي				en	sa	snb-mobile	The application is not working for me and I am not receiving any phone banking connection when I add a new beneficiary. Now I have deleted the application, but it is still disabled for me.	ar	application work receive phone bank connection add new beneficiary delete application still disable	Negative	App Store	0	1	0
App Store	6c3de8dc-b91e-444e-8e4e-22946ac2325a	بدون ا	1/16/23 13:41	كثرة التحديث مالهاداعي				en	sa	snb-mobile	Every moment an update, you making us bored now.	ar	every moment update make us bore	Negative	App Store	1	0	0
App Store	5de2a797-2368-4cfd-a6f3-2452a4698370	H97s	1/15/23 16:33	..				en	sa	snb-mobile	The worst application, it has been two weeks and it won't update my personal information. When I click on "update information," it tells me there is an error with the entered information. I haven't even entered my data yet. Please solve the problem. Thank you.	ar	bad application two weeks wont update personal information click update information tell error enter information havent even enter data yet please solve problem thank	Negative	App Store	1	1	0
App Store	8d72dd78-82ec-41e1-b369-deb087874df1	٩٩٠ سا حي	1/8/23 16:07	كل شوي تحديث ترا ملينا				en	sa	snb-mobile	3 very many stars on you	ar	many star	Positive	App Store	1	0	0
App Store	51b1e3c8-64ab-4f98-92e8-41eda5fd41f4	فواء	1/15/23 10:47	شكوى				en	sa	snb-mobile	"The bank is so annoying, and everything requires me to go to the nearest branch, which I don't know where it is in the app. ð£ð£ð£ð£ð£ð They should provide all services without the need to go to the bank itself. And why can't I transfer from my investment account to my current account? It means they are not fully integrated, and we are in the era of technology."	ar	bank annoy everything require go near branch dont know app provide service without need go bank cant transfer investment account current account mean fully integrate era technology	Negative	App Store	1	1	0
App Store	a13a4388-0e19-483d-b8cb-c17b4fae0756	ابو بلاال	1/14/23 16:19	زي الخرا				en	sa	snb-mobile	The application is the worst	ar	application bad	Negative	App Store	1	0	0
App Store	ed355372-56a5-452e-9d4c-dc21e36762f5	shrouq alghannam	1/13/23 10:22	اسوا تطبيق				en	sa	snb-mobile	The latest updates are bad, especially the application. It keeps logging me out and not letting me access my account. An error message keeps appearing, happening a lot.	ar	late update bad especially application keep log let access account error message keep appear happen lot	Negative	App Store	1	1	0
App Store	095a9df6-7a28-405d-a6ed-afdabfda1ec1	khaled alhjohani	1/11/23 12:53	تحتاجون مبرمج ومحلل ملعومات ممتاز				en	sa	snb-mobile	If you want to work with us, let's have a meeting and hopefully things will go well, God willing.	ar	want work us let meet hopefully things go well god will	Positive	App Store	0	0	0
App Store	f07f5bca-ed00-450d-a5e4-e38eeccadba6	شكرا لانو اسرع شي فالحياه	1/10/23 13:08	تعليق التطبيق				en	sa	snb-mobile	By God, the worst banking application is the Saudi Bank application. The Al-Ahli Bank application freezes and is delayed in sending, and there is a delay in sending the verification code. It hangs in a completely abnormal way.	ar	god bad bank application saudi bank application alahli bank application freeze delay send delay send verification code hang completely abnormal way	Negative	App Store	1	0	1
App Store	1a1f323d-5727-4adb-a032-01bd18d218f5	rarrrddtggju	1/10/23 13:03	فاشل التطبيق الاول افضل				en	sa	snb-mobile	The first application is the worst, the second one is better.	ar	first application bad second one good	Negative	App Store	1	0	0
App Store	1326b5e3-9fff-4090-beee-4b3dc7f1160a	A121S55	1/8/23 22:12	تحديث بشكل متكرر				en	sa	snb-mobile	Almost every week there is an update and there is no difference, they just disrupt our affairs. Very bad.	ar	almost every week update difference disrupt affairs bad	Negative	App Store	1	0	0
App Store	94d8716c-019d-4c86-aa2e-023f077b9135	j. jijhm mv	1/2/23 13:59	عدلوا التطبيق				en	sa	snb-mobile	Whenever I enter, it tells me that it needs an update and it takes a few minutes to enter. Now it's refusing to update from the App Store.	ar	whenever enter tell need update take minutes enter refuse update app store	Negative	App Store	0	1	1
App Store	8beb0da9-d60c-4177-89f6-d14931ad41cd	Haifasweet1	1/8/23 1:40	كيف نحمل التطبيق				en	sa	snb-mobile	The application is beautiful, but its problem lies in downloading it on the phone. We have to access it only through the App Store. Everything is very excellent and very easy, but accessing it is the problem.	ar	application beautiful problem lie download phone access app store everything excellent easy access problem	Negative	App Store	1	1	0
App Store	168eb4fe-0b90-4c6e-955b-acf03a0032ce	kh909	1/6/23 3:02	تطبيق الاهلي موبايل				en	sa	snb-mobile	Terrible, terrible, terrible to the extreme! I am so fed up to the point that I no longer use this account as much as I used to. Even though I used it as my main account before, they brought back the old application and it's better. Every time I try to transfer, an error occurs and it doesn't show you the MADA cards, nor can you add the card in Apple Pay.	ar	terrible terrible terrible extreme feed point long use account much use even though use main account bring back old application good every time try transfer error occur doesnt show mada card add card apple pay	Negative	App Store	1	1	0
App Store	2fa4c815-eb68-41ba-90ed-9b41119d2ca6	..-؟	1/5/23 8:56	سيء جداًاً				en	sa	snb-mobile	The recent updates are very bad. As soon as I enter, it kicks me out. Please revert it back to the way it was before. Your problem has been going on for months and you haven't solved it. God willing, we will switch to another bank along with all those affected.	ar	recent update bad soon enter kick please revert back way problem go months havent solve god will switch another bank along affect	Negative	App Store	1	1	0
App Store	6856a785-dd79-4c5e-803b-6ed380cdb892	عزيز---	1/4/23 22:37	كلمة مرور اكثر من ثمان خانات				en	sa	snb-mobile	My password has more than eight characters and I couldn't log in to the application or Al Ahli Online. You impose silly limits on the customer.	ar	password eight character couldnt log application al ahli online impose silly limit customer	Negative	App Store	1	1	0
App Store	8a949e68-5089-4419-85e8-18a1f04c2514	ابو وليد المسهري	1/2/23 18:12	التطبيق مايفتح معي				en	sa	snb-mobile	I have been trying to open it for a month, but it won't open, it keeps kicking me out of the application.	ar	try open month wont open keep kick application	Negative	App Store	0	1	0
App Store	051caf5a-a4ba-42de-8bcd-7b699f1c5eff	Oo very nice	12/26/22 23:37	مشكله في اضافه الحساب				en	sa	snb-mobile	If I want to add a local bank account, I can only do so through the website. Please fix the loophole.	ar	want add local bank account website please fix loophole	Negative	App Store	1	0	0
App Store	39fb93f1-152c-45fd-8907-a122ede3b2db	Mr. Feras	1/1/23 20:12	من سيء ل أسوأ				en	sa	snb-mobile	It's as if they are a big bank with hundreds of millions in profits... and they don't know how to create an application like the rest of the world and people do. Those who use the application feel like they are in underdeveloped countries that have just recently gained internet access.	ar	big bank hundreds millions profit dont know create application like rest world people use application feel like underdevelop countries recently gain internet access	Negative	App Store	1	0	0
App Store	441b7d95-c1a8-4534-9e19-a4e135db8bac	KeeyMo	12/29/22 6:23	التطبيق الجديد زفت👎				en	sa	snb-mobile	An error in the transfer has been continuously occurring for more than 3 months.	ar	error transfer continuously occur months	Negative	App Store	0	1	0
App Store	508386d9-20fd-480c-a814-05d06f1613f9	fai111111111111111	12/28/22 14:19	سيء				en	sa	snb-mobile	Very bad update, it seems like you are still stuck on your initial design. You didn't even add something as simple as Apple Pay. I can only access the account information except the IBAN!	ar	bad update seem like still stick initial design didnt even add something simple apple pay access account information except iban	Negative	App Store	1	1	1
App Store	7bd35518-d7ec-465a-a966-0ad1563da038	بعغات	12/28/22 11:32	ظهور بطاقات مدى في التطبيق				en	sa	snb-mobile	Why are Debit Card information not being displayed in the application? Why can't I add a Debit Card to Apple Wallet?	ar	debit card information display application cant add debit card apple wallet	Negative	App Store	0	1	0
App Store	e21a3e61-3ff2-4d72-94ec-625a96dbf6dc	LTAY1136	12/27/22 17:50	مشاكل التحديث الأخير				en	sa	snb-mobile	After the new update, it has become one of the worst banking applications. I hope you fix it, as the application opens the App Store sometimes and asks for an update despite already being updated.	ar	new update become one bad bank applications hope fix application open app store sometimes ask update despite already update	Negative	App Store	1	1	0
App Store	18d58fda-636a-41fc-b0cb-a3aeefbead71	رجل ناصح	12/27/22 13:37	تطبيق سئ والاداره سئيه بسبب عدم حل مشكله لها فتره				en	sa	snb-mobile	The problems: - Rejection to enter the application. - Rejection of transfers and being prevented from accessing the application. - We're bored and you have made things difficult for us with this failed application. - It's a waste of time.	ar	problems rejection enter application rejection transfer prevent access application bore make things difficult us fail application waste time	Negative	App Store	1	1	0
App Store	0f8714c4-4e8d-4dbe-8929-75cba4da8d94	فوفا٢٤٢٤٢٤٢٤	12/27/22 11:45	زي الزفت				en	sa	snb-mobile	Like shit	ar	like shit	Negative	App Store	1	0	0
App Store	a9859a31-2b59-4adc-bc97-709bbdf45ddb	kfgtE7	12/27/22 9:20	القائمين على التطبيق والموقع الالكتروني غير مهتمين ابدا				en	sa	snb-mobile	How long will the mistakes in operations continue? And at various times and different days consecutively.	ar	long mistake operations continue various time different days consecutively	Negative	App Store	1	1	0
App Store	9e944891-717c-48d2-b5b3-a84d58110bf7	Saudibanker2010	12/27/22 5:22	خدمات تقنية سيئة				en	sa	snb-mobile	Unfortunately, the technical services are very poor and there are many malfunctions. By the permission of God, I will end my relationship with this bank at the nearest opportunity. There are many alternatives and they are all better.	ar	unfortunately technical service poor many malfunction permission god end relationship bank near opportunity many alternatives good	Negative	App Store	1	1	0
App Store	46b7b185-2055-444f-927f-03ffc467ff34	M.Ali م	12/27/22 3:45	يوم ٢٦ ديسمبر ٢٠٢٢				en	sa	snb-mobile	The application rejects all banking operations.	ar	application reject bank operations	Negative	App Store	1	1	0
App Store	4b5981d0-8617-4768-b744-2bef8d282f06	أبو ضارررررري ع	12/26/22 23:40	ا				en	sa	snb-mobile	Very bad, the worst banking application in Saudi Arabia.	ar	bad bad bank application saudi arabia	Negative	App Store	1	0	0
App Store	8802a188-c4e3-472e-90b9-cd063a9ce830	AboMoaz82	12/24/22 15:55	تحديث بيانات العميل				en	sa	snb-mobile	Special application I hope to fix the feature of updating customer data, as it does not complete until the end.	ar	special application hope fix feature update customer data complete end	Negative	App Store	0	1	0
App Store	26e4f8c2-efb0-4fbf-bc02-70eee9f26d92	…rawan	12/26/22 12:33	🌚				en	sa	snb-mobile	The worst application always hangs.	ar	bad application always hang	Negative	App Store	1	0	1
App Store	6cf57ef1-85b4-4c38-879b-3cfa4e9f3bb3	hajar30	12/26/22 3:11	كشوفات الكترونية				en	sa	snb-mobile	The current version does not have any special features and electronic disclosures have been removed, which is not good.	ar	current version special feature electronic disclosures remove good	Negative	App Store	1	1	0
App Store	e5f6c618-0628-4d8c-884f-0b1a28375dae	mouejb12	12/25/22 5:42	أسوأ بنك				en	sa	snb-mobile	Unfortunately, it is one of the worst banks with a management that is corrupt and acts illegally.	ar	unfortunately one bad bank management corrupt act illegally	Negative	App Store	1	0	0
App Store	41824e05-c704-4cf8-9582-640ebebcaee1	hamadhalgo	12/24/22 19:51	يحتاج الى تطوير				en	sa	snb-mobile	The application lacks most of the features, such as Al Rajhi. I have to call the banking phone if I want to submit a request, and most of the time, it says there is a system error. It is very complicated to search for what I want.	ar	application lack feature al rajhi call bank phone want submit request time say system error complicate search want	Negative	App Store	1	1	0
App Store	fa09a4f5-3b5a-47f9-8bd5-75894fa559db	Doaa.algharbawi	12/24/22 17:58	أسوأ تطبيق				en	sa	snb-mobile	The application has been hanging for over a month now and there is no solution, and the phone service is very poor. The solution is to transfer my account from you.	ar	application hang month solution phone service poor solution transfer account	Negative	App Store	1	1	1
App Store	05eb429f-301a-4395-8ec1-d4700e86ec0a	madlicuios	12/24/22 9:50	اضافة مستفيد بالباركود				en	sa	snb-mobile	I wish there was a feature to add a beneficiary through a barcode like Al Rajhi Bank, instead of sending the account number to each person every time.	ar	wish feature add beneficiary barcode like al rajhi bank instead send account number person every time	Neutral	App Store	1	1	0
App Store	0e12485f-c699-430d-82ee-3ff0aa031df3	ساحرالكلمه	12/24/22 4:59	سيئ جدا جدا جدا				en	sa	snb-mobile	Frequent commenting and failure to complete the transfer or add beneficiaries for the transfer.	ar	frequent comment failure complete transfer add beneficiaries transfer	Negative	App Store	0	1	0
App Store	31ddcf97-f611-4da8-90eb-3882aa7d75d1	نيكون ٢٠٢٠	12/19/22 12:57	تقييم				en	sa	snb-mobile	It seeks continuous updating and always seeks perfection.	ar	seek continuous update always seek perfection	Neutral	App Store	1	0	0
App Store	46718448-4242-41cc-be9c-d65045c56ccf	اشكركم على الخدمه	12/24/22 3:12	بخصوص الاصدار الجديد				en	sa	snb-mobile	It is not worth giving him any rating, he deserves a zero ðð»ðð»ðð»ðð»ðð»	ar	worth give rat deserve zero	Negative	App Store	1	0	0
App Store	2219dc17-0a71-4ffd-b60b-1683842d3cd4	Great ✌🏻️	12/23/22 22:12	تحديث سيء رفض تحويلات بشكل متكرر				en	sa	snb-mobile	I have the right to transfer at any time and any amount, but despite the frequent updates, the transfer problem remains recurring. And with different people, the same problem occurs. If I want to transfer immediately, there are problems in the system, and an error occurs, and the transfer is rejected due to a system problem. How long will our work be disrupted? How long will the problem keep recu…	ar	right transfer time amount despite frequent update transfer problem remain recur different people problem occur want transfer immediately problems system error occur transfer reject due system problem long work disrupt long problem keep recur	Negative	App Store	0	1	0
App Store	65317409-0a78-4bba-aa65-d150acdb1876	almalki7788	12/23/22 11:53	غبي				en	sa	snb-mobile	"A stupid and bad application, you register with the Quick Login service and suddenly it cancels itself. Sometimes the electronic services are bad, and you need to transfer and then you find out that it's not working. It has many problems. Thank God I withdrew my salary from them, I finally got rid of it."	ar	stupid bad application register quick login service suddenly cancel sometimes electronic service bad need transfer find work many problems thank god withdraw salary finally get rid	Negative	App Store	1	1	0
App Store	243a43fb-7fbd-465b-8d48-f5dbfb50b597	Amkrkb	12/23/22 9:08	تطبيق الاهلي السابق افضل				en	sa	snb-mobile	The new application is limited in capabilities and cannot be compared to the previous one. It is not clear how you can add a card to the Apple wallet.	ar	new application limit capabilities compare previous one clear add card apple wallet	Negative	App Store	0	1	0
App Store	5c7e5830-95e0-4c10-9058-06980de87431	h700m	12/22/22 23:15	سيء				en	sa	snb-mobile	The worst banking application I have used. It's slow, lags, and has delayed updates and issues.	ar	bad bank application use slow lag delay update issue	Negative	App Store	1	0	1
App Store	11d582a4-e863-46b4-85e9-2384d26552a9	Nawaf Alageel	12/22/22 12:32	👎🏻				en	sa	snb-mobile	Complicated and slow, hangs a lot.	ar	complicate slow hang lot	Negative	App Store	1	0	1
App Store	dcb83e1d-421b-4264-8311-5ccbd08cc0af	Faris281256	12/21/22 3:55	ملخص التمويل				en	sa	snb-mobile	Why didn't you include the summary of funding, requirements, and assets like before? You need to add them.	ar	didnt include summary fund requirements assets like need add	Negative	App Store	0	1	0
App Store	79bcd919-65c5-430a-abe1-a5fea633cd6e	ßя̈şτ̅ǝ̵ǝ̵Ǧ	12/20/22 19:38	بحاجة الى اضافة تغير لون الشكل الخارجي				en	sa	snb-mobile	With the change of the interior color, the main interface for login does not change, and this is very annoying. Also, we hope that you add the option to scan a QR code to add beneficiaries to facilitate the service. During the beneficiary transfer process, the option to add should be optional according to the beneficiary's preference to avoid service delays.	ar	change interior color main interface login change annoy also hope add option scan qr code add beneficiaries facilitate service beneficiary transfer process option add optional accord beneficiarys preference avoid service delay	Negative	App Store	1	0	1
App Store	fd706179-17f9-4976-9bcf-661e0ceb12f0	واحد توهق في بنك الاهلي	12/20/22 7:48	ً				en	sa	snb-mobile	You keep occupying us with updates all the time.	ar	keep occupy us update time	Neutral	App Store	1	0	1
App Store	d3984649-98dc-4a0b-a31e-272f2d413b18	اكثر من رائع وجزاكم الله خير	12/20/22 3:08	الرياض				en	sa	snb-mobile	"The application has a glitch, please fix it. It takes us back to the app store for an update even though it is already updated, and we can only open it through it."	ar	application glitch please fix take us back app store update even though already update open	Negative	App Store	0	1	0
App Store	6dafab92-dc6c-4e74-a7d0-86cf05bb20b9	MuhOotbb	12/20/22 1:35	تطبيق معلق				en	sa	snb-mobile	Every once in a while, there are opposite errors in the Al Rajhi application. The application is very poor!	ar	every opposite errors al rajhi application application poor	Negative	App Store	1	1	0
App Store	cd6a445c-944a-4c0b-a3c1-084437409638	ريم عيد	12/19/22 21:56	يجيب الهم				en	sa	snb-mobile	At night, forget that he works, especially after 2 o'clock, it sucks, I feel like I've wasted my life.	ar	night forget work especially oclock suck feel like ive waste life	Negative	App Store	1	1	0
App Store	3e282765-150a-43e2-9d6d-d9746db42898	Awad anzi	12/19/22 20:45	لايواكب التطلعات كان الحلم ان ينافس الراجحي				en	sa	snb-mobile	The application is not updated and has many errors. There is no support and it is very slow in browsing. I recommend considering the Rajhi application and following in their footsteps.	ar	application update many errors support slow browse recommend consider rajhi application follow footsteps	Negative	App Store	1	0	1
App Store	dee68fa2-ce4a-4d3b-949f-888e106bfe32	Abdalah.1431	12/19/22 18:47	للاسف				en	sa	snb-mobile	After the update, the application does not work on version 14.0.1.	ar	update application work version	Negative	App Store	0	1	0
App Store	d2729cf7-e875-4de0-b72a-9c432e3ba06f	fahaah	12/19/22 10:04	مشكلة التطبيق				en	sa	snb-mobile	Except for now, the problem of opening the application, transfers, deposits, payments, and others ... The problems that are happening in the application have exhausted me.	ar	except problem open application transfer deposit payments others problems happen application exhaust	Negative	App Store	0	1	0
App Store	d68d2f53-9005-450b-acaf-d28964ce6a39	Saud alshammari88	12/17/22 21:09	Error				en	sa	snb-mobile	Errors Errors Errors	en	errors errors errors	Negative	App Store	0	1	0
App Store	28da95c3-9d2f-475b-90a9-d61d2c69180b	Laa.M	12/17/22 23:40	التطبيق قدراته ضعيفه				en	sa	snb-mobile	The application is not working properly and it has many errors.	ar	application work properly many errors	Negative	App Store	0	1	0
App Store	a5b32110-7cd5-4fe4-bf54-5fb9135ce1f6	Hasn890	12/17/22 21:31	سئ				en	sa	snb-mobile	Hello and may peace, mercy, and blessings of Allah be upon you. Frankly, the application is very, very bad. Every time we try to transfer, there is always an error, especially at night. This application was created to serve customers, but, by Allah, it is very bad. I am seriously considering switching my salary to another bank. Look at how other bank applications work and provide quick service. B…	ar	hello may peace mercy blessings allah upon frankly application bad every time try transfer always error especially night application create serve customers allah bad seriously consider switch salary another bank look bank applications work provide quick service application errors upon errors please try even transfer money account require wait hour two balance update application make transactions	Negative	App Store	1	1	0
App Store	5ca32861-c6f2-412a-9658-e295b9362d54	عميل البنك من اكثر من 30 سنة	12/14/22 17:15	لماذ المراجعات باللغة الانجليزية				en	sa	snb-mobile	I don't know the reason why all the reviews are in English, even though the bank is Saudi.	ar	dont know reason review english even though bank saudi	Negative	App Store	1	0	0
App Store	fe92739a-2f86-4ee4-896d-dfb5c5c89e9d	Maha AL-Taleb	12/17/22 16:02	التطبيق به مشاكل تقنية في ادخال رقم الهاتف				en	sa	snb-mobile	I have forgotten my password due to stress, and when I enter my phone number, the bank added a hyphen (-) during programming, which is counted as a digit, so it becomes 50123-4568. I am unable to enter the last digit because of the hyphen, making it a total of 10 digits. The mobile number I entered is only 9 digits, so I cannot add the remaining digit! I entered my username and password, but it s…	ar	forget password due stress enter phone number bank add hyphen program count digit become unable enter last digit hyphen make total digits mobile number enter digits add remain digit enter username password show error even though correct enter pin bank phone show error try methods even though correct keep reject ask go branch attempt suddenly text turn code especially contact us page complete fail…	Negative	App Store	1	1	0
App Store	87e56204-e69e-42e8-bfb6-0d04eb916a03	abdullah1119999-	12/17/22 13:39	اسواء تطبيق				en	sa	snb-mobile	Unfortunately, Al-Ahli Bank's application has become very slow and difficult to use.	ar	unfortunately alahli bank application become slow difficult use	Negative	App Store	1	0	1
App Store	d923bca9-fb33-4651-ba6d-aca8549dc873	نادر العاصمي	12/17/22 0:58	يرفض تسجيل الدخول				en	sa	snb-mobile	You release updates more than once, but the same problem keeps occurring. The app now freezes and won't open for me, and your last update was 5 days ago. What should I do now? Move and find a solution in your updates and this flawed application of yours.	ar	release update problem keep occur app freeze wont open last update days ago move find solution update flaw application	Negative	App Store	0	1	1
App Store	bb85032e-bc13-4a26-8b1b-375c94d85d4d	okok ggbb	12/16/22 17:00	يستهل ربع نجمه				en	sa	snb-mobile	I gave him a star for the self-service feature of the card at the ATM, but they disappointed me with their application. Until now, the application has not been activated, and it is slow and has a bad user interface. I only receive the verification message after ending the call.	ar	give star selfservice feature card atm disappoint application application activate slow bad user interface receive verification message end call	Negative	App Store	1	0	1
App Store	b0d66905-4d43-4c08-ac86-82f3fb758d21	Cap10osama	12/16/22 15:57	التحويل لحساب محلي لا يعمل				en	sa	snb-mobile	The transfer to a local account has not been working for over two weeks, and when I called, they said it's a technical issue. They told me to try transferring from a laptop or computer browser. Okay, but until when? And if I transfer from a browser, I have to authenticate the device, and the authentication code doesn't arrive until I give up and close the line!!! There is no power or strength exc…	ar	transfer local account work two weeks call say technical issue tell try transfer laptop computer browser okay transfer browser authenticate device authentication code doesnt arrive give close line power strength except allah update problem still ongoing today december	Negative	App Store	0	1	0
App Store	a76b3fe2-3e2c-41c5-b9bc-5962601529ed	Alhemifa	12/16/22 10:43	تطبيق سيء				en	sa	snb-mobile	Bad app	ar	bad app	Negative	App Store	1	0	0
App Store	d2877c59-6bcf-43a7-9cf7-9d5bdd4100a0	fbfdgbbvf	12/16/22 3:03	دخول سريع				en	sa	snb-mobile	quick login	en	quick login	Neutral	App Store	0	1	0
App Store	74593492-52cd-441c-8a39-d577a29dc2b0	Rashed8	12/15/22 23:53	دايم معلق التطبيع				en	sa	snb-mobile	And every second, it kicks me out, and it freezes and slows down, and the conversions don't work properly.	ar	every second kick freeze slow conversions dont work properly	Negative	App Store	0	1	1
App Store	ce4581b7-a3f8-47f4-a841-659001cbbeed	العرب الفاشلين	12/15/22 19:04	ياسر				en	sa	snb-mobile	Zaq service	ar	zaq service	Neutral	App Store	0	1	0
App Store	6c176584-0abc-43a1-9aa7-7bf186438648	bgtzp	12/15/22 14:32	التحديث الجديد				en	sa	snb-mobile	Stupid update	ar	stupid update	Negative	App Store	1	0	0
App Store	a93fa461-aac7-471e-abd0-59c4fddafc7a	بنك الراجخي	12/15/22 11:19	ازفت تطبيق يرفع الضغط 👎				en	sa	snb-mobile	I downloaded an application that raises blood pressure for 3 days, and you couldn't even update it. What a useless application?? The worst development bank. ð¾	ar	download application raise blood pressure days couldnt even update useless application bad development bank	Negative	App Store	1	1	0
App Store	aae2c6ea-a9eb-4560-9f8e-63d4bc4e5a3f	Mrwelan501	12/15/22 0:42	للأسف الناس تتقدم و انتم ترجعون للوراء				en	sa	snb-mobile	Your update to the new application is very frustrating. It has become unnecessarily complicated, trying to impose a new identity on the previously better application and bank. Now it has become the worst app, which is why I have reached a point where I don't use the app at all. I have transferred all my financial transactions to another bank after being a customer for more than ten years. Goodbye…	ar	update new application frustrate become unnecessarily complicate try impose new identity previously good application bank become bad app reach point dont use app transfer financial transactions another bank customer ten years goodbye service improve	Negative	App Store	1	0	0
App Store	43e55eef-01f9-44f1-9acc-11470bdc106a	FFFFFFFF5739	12/14/22 21:39	تحديث سيء				en	sa	snb-mobile	Unfortunately, your update is very bad. When attempting to modify the daily limit, it doesn't change, and the application has been terrible since you first launched it until now. Unfortunately, you will never reach the speed and technology of Al Rajhi Bank.	ar	unfortunately update bad attempt modify daily limit doesnt change application terrible since first launch unfortunately never reach speed technology al rajhi bank	Negative	App Store	1	0	1
App Store	6d3cd884-a360-443b-a50e-e434a0ea66a7	F ALZAHRAA	12/14/22 20:55	سيئ				en	sa	snb-mobile	The application is not working and the bank is not interested.	ar	application work bank interest	Negative	App Store	0	1	0
App Store	138c441d-a05f-4f6a-8070-86b28062792a	Somemor	12/14/22 13:55	ممتاز				en	sa	snb-mobile	I complete everything I need with ease of handling.	ar	complete everything need ease handle	Positive	App Store	0	0	0
App Store	99371bcb-3d83-4f27-9981-956994f7287f	3b.89	12/14/22 13:23	سيئ				en	sa	snb-mobile	The worst bank and the worst application in Saudi Arabian banks.	ar	bad bank bad application saudi arabian bank	Negative	App Store	1	0	0
App Store	cc192e2d-9922-4212-85de-c8aa0f8bcfe7	iview1	12/14/22 12:42	من جرف لدحديرة				en	sa	snb-mobile	The application is as I mentioned. The bank does not have it. Policies and Procedures Manual. The knowledgeable person understands what I mean.	ar	application mention bank policies procedures manual knowledgeable person understand mean	Neutral	App Store	1	0	0
App Store	575b0c83-f67b-4491-8eb7-d382aca39bf6	moha1331989	12/14/22 11:30	التطبيق في حالة سيئة جداً م يفتح معي..				en	sa	snb-mobile	The application is in a very bad state, it doesn't open for me.	ar	application bad state doesnt open	Negative	App Store	1	1	0
App Store	24673e03-c2ca-4e20-b6be-2ff4193964d7	naif saman	12/13/22 21:52	تراجع في اداء البرنامج				en	sa	snb-mobile	There has been a decline in the program's performance and the reason is that the user can no longer issue a reference number for a new ATM card, which has negatively affected service delivery in branches and caused severe overcrowding due to the issuance of a reference number. Additionally, most self-service devices do not accept the customer's fingerprint.	ar	decline program performance reason user long issue reference number new atm card negatively affect service delivery branch cause severe overcrowd due issuance reference number additionally selfservice devices accept customers fingerprint	Negative	App Store	1	1	0
App Store	af36aafd-5426-472c-bf52-6d3c2d810f0e	محمد قندوري	12/14/22 8:18	سيىء				en	sa	snb-mobile	The worst banking application in life.	ar	bad bank application life	Negative	App Store	1	0	0
App Store	83f12f3e-0243-4b86-8905-704e1fbc9049	43alios	12/14/22 7:22	Os				en	sa	snb-mobile	I hope to have the option to update personal data through the application (phone number - email).	ar	hope option update personal data application phone number email	Neutral	App Store	0	1	0
App Store	3e30781d-35be-488e-9a48-e82f3403d3c7	ryan.hanfi	12/14/22 0:31	تطبيق سيئ جداااا				en	sa	snb-mobile	There are many comments and it's slow, it doesn't feel like a better application than the Hngrstichn bank.	ar	many comment slow doesnt feel like good application hngrstichn bank	Negative	App Store	1	0	1
App Store	9fc3586e-743c-465b-bef6-e574f9a1d0eb	7ussaino	12/13/22 9:13	مشكلة				en	sa	snb-mobile	The update is very bad, after completely changing the application, its errors increased. An error occurred whenever I tried to use it again, especially when transferring money or logging into the application. I hope it gets updated for the better.	ar	update bad completely change application errors increase error occur whenever try use especially transfer money log application hope get update good	Negative	App Store	1	1	0
App Store	f3eec325-af3a-4110-8ebf-e215eadc27e7	Medo02	12/13/22 17:24	تعطل الخدمات				en	sa	snb-mobile	I recommend the bank not to close the system after 12 midnight and to provide application services 24 hours a day.	ar	recommend bank close system midnight provide application service hours day	Neutral	App Store	1	0	0
App Store	191a0730-952c-44c4-a1f5-95c454f379b4	SaudDehan	12/13/22 17:22	علق التطبيق علي بعد اخر تحديث				en	sa	snb-mobile	This was the only application that worked properly on my phone. But subhan Allah, the app owner released an update that ruined everything and now I can't access the app. Every time I try to open the app, it kicks me out after a second. The problem is that this was the only reliable app for me, and now I have nothing because the others have the same crashing issue. You guys are the worst and you'v…	ar	application work properly phone subhan allah app owner release update ruin everything cant access app every time try open app kick second problem reliable app nothing others crash issue guy bad youve stress end useless ruin app phone like mine	Negative	App Store	1	1	0
App Store	2b3b28f5-0ccd-44c1-a426-0e5a4d6abf05	World Traviller	12/13/22 16:47	ليس تطبيق متقدم				en	sa	snb-mobile	Unfortunately, the application is primitive and not advanced, and it is not easy to access services.	ar	unfortunately application primitive advance easy access service	Negative	App Store	1	0	0
App Store	880f5094-dc47-4c96-9825-0dc36c719e29	fdgdfdd	12/13/22 16:36	بدل النجمه				en	sa	snb-mobile	If there was a thumb instead of a star, it would be better for rating.	ar	thumb instead star would good rat	Neutral	App Store	1	0	0
App Store	f65aa981-06d4-403e-bc12-5597fdf42b32	Ksa ksa	12/13/22 15:45	سيئ				en	sa	snb-mobile	We don't want colors. We want you to learn from competing banks' applications and fix yours to be like them. No philosophy needed. It's enough that you close from 12 midnight until morning. All of this is maintenance. Even grocery stores do inventory, organization, and accounting, and they're open 24 hours. If you can't do it, then go back to the old application for us.	ar	dont want color want learn compete bank applications fix like philosophy need enough close midnight morning maintenance even grocery store inventory organization account theyre open hours cant go back old application us	Negative	App Store	1	1	0
App Store	6ae36ca5-192c-4e79-b70c-93ce814bdd7f	ibrataha	12/13/22 13:58	سيئ				en	sa	snb-mobile	ðð¼ðð¼ The delay is not normal and things have become even more complicated.	ar	delay normal things become even complicate	Negative	App Store	1	0	1
App Store	4bf40a26-8158-489e-ad3a-914bcb5ccd5a	9927732	12/13/22 11:14	.				en	sa	snb-mobile	The application is a good idea, but it is one of the worst banking applications in terms of speed of response and the availability of services provided in it.	ar	application good idea one bad bank applications term speed response availability service provide	Negative	App Store	1	0	0
App Store	b9869367-e90a-47f2-9528-dfb18c9fe564	Naif deeb	12/13/22 10:42	سيئ				en	sa	snb-mobile	The worst application in the world of applications and the worst bank in the world of banks.	ar	bad application world applications bad bank world bank	Negative	App Store	1	0	0
App Store	5067c360-c4da-4532-b950-be58add13260	محمد 990099	12/13/22 10:27	سيئ 👎🏼				en	sa	snb-mobile	Bad and deserves less than one star ðð¼	ar	bad deserve less one star	Negative	App Store	1	0	0
App Store	405a4f3a-a88b-4149-aa7d-fa5df661f031	babrie girl	12/13/22 9:38	تحديث سئ جدا				en	sa	snb-mobile	And from bad to worse.	ar	bad bad	Negative	App Store	1	0	0
App Store	f0566ce1-1ad5-4314-bf6c-5ba008fd8243	قوقلللل	12/13/22 5:23	لغتي العربيه وحبها				en	sa	snb-mobile	"The most important thing for a person is not to lose their Arabic language. Arabic is the best language, why write in English? We are mostly Arabs here."	ar	important thing person lose arabic language arabic best language write english mostly arabs	Positive	App Store	1	0	0
App Store	c8b37c58-d30d-4153-beb9-93363254f3a9	moudy zaben	12/13/22 6:08	ابثرتونا بالتحديثات اللي مالها سنع				en	sa	snb-mobile	Why do you increase the size of the application after each update? It is supposed to decrease in size because you are developing it on a regular basis. Also, why is it mandatory to update the application before being able to access it?	ar	increase size application update suppose decrease size develop regular basis also mandatory update application able access	Negative	App Store	1	0	0
App Store	40295c19-d6c8-41a1-b5c4-d9ba9d1c28a6	iii_Mr-Devil_zX	12/13/22 5:12	التطبيق القديم أفضل بمراحل والجديد سيء جدًا جداً				en	sa	snb-mobile	The new application has problems and freezes during critical transactions, and it does not log in properly. The program needs development and improvement to fix these issues and enhance the user experience because it is currently the worst compared to the previous version, which was excellent.	ar	new application problems freeze critical transactions log properly program need development improvement fix issue enhance user experience currently bad compare previous version excellent	Negative	App Store	1	1	1
App Store	6cdec052-82cc-4be7-bc58-2e822d59fa3f	wael999999	12/13/22 3:43	القرض العقاري				en	sa	snb-mobile	Why is there no option for early repayment? Why do I have to go to the branch?	ar	option early repayment go branch	Negative	App Store	0	1	0
App Store	7f6a7841-eb7c-40c0-b31f-0ce19568d1c7	po hup is good	12/13/22 0:33	تحديث جديد معلق				en	sa	snb-mobile	I have been using it for two days and as soon as I logged into the program, it kicked me out. Now I'm checking how much is left in my account. I'm not confident.	ar	use two days soon log program kick im check much leave account im confident	Negative	App Store	0	0	0
App Store	fc4a9257-c511-453d-b259-2fc4a474be8d	ahmed1442	12/12/22 14:05	تحديث للاسوأ				en	sa	snb-mobile	The use of the application has become more complicated, previous versions were easier.	ar	use application become complicate previous versions easy	Neutral	App Store	1	0	0
App Store	6c240ed2-8311-40cd-99fd-242571371395	x7eem4	12/12/22 23:59	التطبيق سئ جدااا				en	sa	snb-mobile	They brought back the old application.	ar	bring back old application	Neutral	App Store	1	0	0
App Store	70a4acd9-c0ce-46bb-8aed-a5b54670724f	turki506080	12/12/22 23:23	سيء				en	sa	snb-mobile	Application Review The previous application was better.	ar	application review previous application good	Positive	App Store	1	0	0
App Store	ddebd475-d0ef-45b1-9fc7-29d5d30ba2c1	Emran Qadi	12/12/22 20:50	أزبل بنك ممكن تتعامل معاه				en	sa	snb-mobile	Advice: Do not put your money in this bank, as it is garbage from all perspectives. Its branches, services, and even its application are all extremely bad.	ar	advice put money bank garbage perspectives branch service even application extremely bad	Negative	App Store	1	0	0
App Store	19930882-1a4e-4068-bbae-bf5806079521	Obadah hassan	12/12/22 20:12	كثير الاخطاء				en	sa	snb-mobile	Dealing with your terrible application has become easier than dealing with customer service. If you can't improve your app, at least revert to the old one that was error-free.	ar	deal terrible application become easy deal customer service cant improve app least revert old one errorfree	Negative	App Store	1	1	0
App Store	6bba88f0-99a5-4cbe-bfa7-dc3f428de0c2	506t	12/12/22 19:57	سيئ جدًا				en	sa	snb-mobile	I wish you could take a course at Al Rajhi about the application, specifically.	ar	wish could take course al rajhi application specifically	Neutral	App Store	1	0	0
App Store	2d7fd1e5-d63e-4778-9a2b-470823758b47	AAaaaaaaaaxxxzzz	12/12/22 19:43	.				en	sa	snb-mobile	From bad to worseð« ðð¼ðð¼ðð¼ðð¼ðð¼ðð¼ðð¼ðð¼	ar	bad bad	Negative	App Store	1	0	0
App Store	e901f952-f740-4544-90f9-a5a455169253	naba4lm	12/12/22 18:19	كل شوي امسح واحمل التطبيق				en	sa	snb-mobile	I face a problem every now and then where an error pops up when I try to log in, and then I have to delete the application and reinstall it just for it to work. Please find a solution, I'm used to your fast and efficient work, but now you're starting to deviate from what you're known for.	ar	face problem every error pop try log delete application reinstall work please find solution im use fast efficient work youre start deviate youre know	Negative	App Store	0	1	0
App Store	c84a280d-ee42-4ed3-88fa-4efaf78bdad7	FLTr1998	12/12/22 17:29	ارحمونا				en	sa	snb-mobile	The program has been running for two hours. I want to open it, but it keeps refusing. Every time I try to enter, it crashes on me. May God curse you all.	ar	program run two hours want open keep refuse every time try enter crash may god curse	Negative	App Store	0	1	0
App Store	7baad06b-6a67-448e-98bd-e43c20ea2770	sultanovic77	12/12/22 17:17	ازفت تطبيق				en	sa	snb-mobile	Honestly, this application is a black mark on Al Ahli Bank in Saudi Arabia. Find a solution, it is unreasonable that a bank like Al Ahli cannot provide an application without the bugs and the frustration it contains.	ar	honestly application black mark al ahli bank saudi arabia find solution unreasonable bank like al ahli provide application without bug frustration contain	Negative	App Store	1	1	0
App Store	4db042a0-2da8-4555-bf73-c18b130db2cc	صوت العزاوي	12/12/22 14:57	أسوء اسوء				en	sa	snb-mobile	"All that he has is the worst."	ar	bad	Negative	App Store	1	0	0
App Store	aae3cc1e-569d-4b4b-83c1-6cc6511c813c	saudbni1	12/12/22 14:41	سيء وعلى مزاجه يحول				en	sa	snb-mobile	Bad application and sometimes it freezes and sometimes it crashes, I don't recommend it.	ar	bad application sometimes freeze sometimes crash dont recommend	Negative	App Store	1	1	1
App Store	e3d8619e-77db-49dd-90a3-258a49f2956d	Dr.Infairness	12/12/22 10:15	نقص في ميزات التطبيق القديم				en	sa	snb-mobile	It may be more beautiful, but some important features have disappeared, such as the ability to pay for another customer's credit card from my account, and it has become complicated. Sometimes, we also faced problems when transferring from the account to the prepaid credit card. I hope they will be fixed. Moreover, after twelve o'clock, there is no possibility to perform any service for several ho…	ar	may beautiful important feature disappear ability pay another customers credit card account become complicate sometimes also face problems transfer account prepay credit card hope fix moreover twelve oclock possibility perform service several hours	Negative	App Store	1	1	0
App Store	a8ba252d-af28-4b2e-b87f-1a9736c7493b	RAKAN alhudaib	12/12/22 13:15	التطبيق الجديد				en	sa	snb-mobile	Very, very bad, many problems are arising from the application and there is an error during the transfer process. I don't understand the reason for the change. Initially, it was excellent honestly. These are reasons that make me consider closing my account with Al-Ahli.	ar	bad many problems arise application error transfer process dont understand reason change initially excellent honestly reason make consider close account alahli	Negative	App Store	1	1	0
App Store	51029439-7d1b-4a5a-9bae-41896dc96a84	1£/!&'w	12/12/22 12:51	تخلون الواحد يترك البنك عشان عالتطبيق				en	sa	snb-mobile	The application is bad and its updates are very frequent. It frustrates you completely and has become difficult for people. They have started to find easier ways. Now it takes me half an hour to update and it is very slow.	ar	application bad update frequent frustrate completely become difficult people start find easy ways take half hour update slow	Negative	App Store	1	0	1
App Store	2836e391-5cb9-4709-8ab0-ca0bb64703be	البنك سيئ	12/12/22 12:36	برنامج سيئ وكل تحديث يحذفون حسابي				en	sa	snb-mobile	The program is very bad and the bank is bad too, I do not recommend it.	ar	program bad bank bad recommend	Negative	App Store	1	0	0
App Store	f5d05d36-b848-44bf-901b-2045c507ab36	MN990	12/12/22 11:50	Cc				en	sa	snb-mobile	Bad bank and worse application and its updates are many.	ar	bad bank bad application update many	Negative	App Store	1	0	0
App Store	bf6e7c72-a04c-43a8-b10c-863ebd327e08	Sahar Alsahli	12/12/22 11:32	التطبيق الجديد سيء جدًا				en	sa	snb-mobile	The new update is very bad and they removed many features that were previously available, such as the reference number for the ATM card. I hope the bank improves its digital service because it is important.	ar	new update bad remove many feature previously available reference number atm card hope bank improve digital service important	Negative	App Store	1	0	0
App Store	83e0f098-fd76-43cd-b1ff-5afe12e98c79	nooralii	12/12/22 11:20	الرجاء حل مشكلتي				en	sa	snb-mobile	1- I am unable to file a complaint through the application or browser. 2- I verified my laptop's device on Chrome browser in order to transfer a sum of money, and I was asked for a 48-hour verification deadline. After 48 hours, I was asked to perform a new verification process. This has happened to me more than 5 times without a resolution. Unfortunately, the service is poor and I have been suffe…	ar	unable file complaint application browser verify laptops device chrome browser order transfer sum money ask hour verification deadline hours ask perform new verification process happen time without resolution unfortunately service poor suffer hope add option permanently close bank account customers rat star	Negative	App Store	1	1	0
App Store	830d29e8-cbcf-4bba-b658-51533fed9d6e	saaarshh	12/12/22 10:36	خطا في كل مره				en	sa	snb-mobile	The application was good before its logo changed. After the change, it became very bad and always crashes.	ar	application good logo change change become bad always crash	Negative	App Store	1	1	0
App Store	bf7b2f47-0f80-411e-9b89-73e39161f0ad	hshom abo ryon	12/12/22 7:35	Walet المحفظة				en	sa	snb-mobile	I cannot add the credit card through the application.	ar	add credit card application	Neutral	App Store	0	1	0
App Store	f9ad3034-2c6b-4a9c-9c11-855777618541	mona9090	12/12/22 10:00	سيء جدًا				en	sa	snb-mobile	I will change to another bank as soon as possible that respects its customers.	ar	change another bank soon possible respect customers	Neutral	App Store	1	0	0
App Store	910bbd0d-125f-4557-9b76-acbd94d1c770	Hzsyujkljgfvg	12/12/22 9:46	سيء				en	sa	snb-mobile	Very bad and prone to many malfunctions. Bring back the old one.	ar	bad prone many malfunction bring back old one	Negative	App Store	1	1	0
App Store	93cf5e5e-6b27-44ff-a455-eeb9735c814c	لومي 🤍	12/12/22 9:19	اسوء تطبيق				en	sa	snb-mobile	Even a single star takes 48 hours for me to be able to transfer to a local bank. We tried but the system only authenticates with the spirit's exit. It's nice that there is security, but not to the extent of this complexity.	ar	even single star take hours able transfer local bank try system authenticate spirit exit nice security extent complexity	Negative	App Store	1	0	1
App Store	f6618e86-bed5-42bf-9533-f13864ca57cf	سطام الوافي	12/12/22 9:16	سطام				en	sa	snb-mobile	A great program	ar	great program	Positive	App Store	0	0	0
App Store	d9434b48-c393-400f-b4a4-3385de3c94c1	ابوابراهيم2	12/12/22 3:14	نفس المشكلة				en	sa	snb-mobile	When you enter the application, it forcibly prompts you to update, and then there is no update available!	ar	enter application forcibly prompt update update available	Negative	App Store	0	1	0
App Store	5cd7cffb-5f96-4e37-91ac-eb996b1bc404	Naif 1985	12/11/22 18:20	سيء سيء سيء سيء شوفوا حل والا تركناكم				en	sa	snb-mobile	I have been a customer of Ahli Bank for over 15 years, but now I have reached a point where I have to change banks. Other companies are improving their services while the bank is declining. The application is very bad and has put me in difficult situations due to the delays in transferring between my accounts and waiting for the confirmation code that takes two to three hours to arrive. I used to…	ar	customer ahli bank years reach point change bank company improve service bank decline application bad put difficult situations due delay transfer account wait confirmation code take two three hours arrive use tolerate help allah switch another bank wish best hope improve future	Negative	App Store	1	0	1
App Store	f5e81b5c-8e56-4d30-a483-f0e948c93c2a	Love loona	12/11/22 17:27	من اسوى بنك				en	sa	snb-mobile	Who makes a bank and an application in the world, and when you enter, it says you've been logged out!? Goodbye!! ð¡ð¡	ar	make bank application world enter say youve log goodbye	Negative	App Store	0	1	0
App Store	5f605382-ee55-49d8-91ce-c4c4c2d4710e	ushejdi	12/11/22 6:30	جدة				en	sa	snb-mobile	The application is very bad, it freezes and does not load quickly, it is terrible.	ar	application bad freeze load quickly terrible	Negative	App Store	1	0	1
App Store	ad7a50aa-5aea-4105-9a57-e65a488250db	Ekseer	12/11/22 4:24	تطبيق لايرقى لتطلعات بنك عريق				en	sa	snb-mobile	The application has many errors and is often under maintenance for a long time, especially from 12 PM to 3 AM. What we want from the application is for it to be secure, powerful in execution, fast, and intelligent. We don't want flashy interfaces and weak programming foundations. I, and many others, imagine that the previous program was stronger and faster, and I am confident that you will addres…	ar	application many errors often maintenance long time especially pm want application secure powerful execution fast intelligent dont want flashy interfaces weak program foundations many others imagine previous program strong fast confident address issue quickly accept anything less excellence thank accept criticism lead fix problem please accept utmost respect	Negative	App Store	1	1	0
App Store	e46389a4-a2c9-44f9-ba62-ae95da9c1120	taraq67443	12/10/22 13:43	البرنامج مايشتغل				en	sa	snb-mobile	They released a new update, you worst.	ar	release new update bad	Negative	App Store	1	0	0
App Store	eb4c320e-ab30-47cc-bd21-4ca13be1044d	تبتببيتتلرزذب	12/9/22 8:40	الدخول				en	sa	snb-mobile	As soon as you enter the application, it takes you out, and sometimes it takes more time than necessary to convert because it gives you a message that the process is incorrect. The new update is bad.	ar	soon enter application take sometimes take time necessary convert give message process incorrect new update bad	Negative	App Store	1	0	1
App Store	4c77a06f-b858-4f1c-8efc-3a991ce8f0ad	anfalmmm	12/8/22 17:52	الاهلي				en	sa	snb-mobile	The application is very bad and it hangs a lot. And when it becomes 12 o'clock, the application freezes and cannot transfer or open.	ar	application bad hang lot become oclock application freeze transfer open	Negative	App Store	1	0	1
App Store	869fd68d-c8b8-4154-a490-8ab3e9840f50	gaddddddddddddddo	12/8/22 6:22	ربع نجمة				en	sa	snb-mobile	Unfortunately, the application is very slow and lags. Since the last update, it hasn't worked properly and freezes upon opening. Unfortunately, our expectations were not met. We miss Samba services.	ar	unfortunately application slow lag since last update hasnt work properly freeze upon open unfortunately expectations meet miss samba service	Negative	App Store	0	1	1
App Store	6bdc2fe2-aa75-4381-b38f-0e3b08542d22	‏قهر	12/8/22 0:12	فاشل				en	sa	snb-mobile	The worst bank and the most unsuccessful program.	ar	bad bank unsuccessful program	Negative	App Store	1	0	0
App Store	45fe71e2-0509-4e76-997a-6b0ce8188329	fahadggggg	12/7/22 11:06	صعوبة في التحويل				en	sa	snb-mobile	The new program has a problem and it always happens to me when I try to transfer money between my accounts. Every time I enter the activation code, it is rejected and asks me to try again several times. Also, when I try to enter the program and enter the correct number, it asks me to try again. Please fix the problem as soon as possible.	ar	new program problem always happen try transfer money account every time enter activation code reject ask try several time also try enter program enter correct number ask try please fix problem soon possible	Negative	App Store	0	1	0
App Store	ef192890-9678-46ba-a996-267879602cfc	yassr1122	12/6/22 21:53	مراجعه للتطبيق الجديد				en	sa	snb-mobile	The application is slow. The previous application was better in terms of performance.	ar	application slow previous application good term performance	Negative	App Store	1	0	1
App Store	342783b3-5600-485d-90e2-459f0da403e7	ت ف تف	12/6/22 21:06	اسواء تطبيق				en	sa	snb-mobile	There are the worst applications like this that I have never seen.	ar	bad applications like never see	Negative	App Store	1	0	0
App Store	d482c14d-1b31-45d0-84c0-2b6790349198	أبو صالح ٠٠٧	12/5/22 21:52	SA				en	sa	snb-mobile	The application is very bad because when you transfer a amount or pay a bill, you have to wait for half an hour and sometimes it accepts and doesn't show "retry". Furthermore, the amounts do not update quickly in the account. You have to log out whether you add an amount or withdraw it, the new amount does not appear after the transaction. Honestly, may Allah be pleased with Samba bank, their ser…	ar	application bad transfer amount pay bill wait half hour sometimes accept doesnt show retry furthermore amount update quickly account log whether add amount withdraw new amount appear transaction honestly may allah please samba bank service amaze alahli bank bad like bank bangladesh	Negative	App Store	1	1	0
App Store	2273d773-7829-44dd-a183-45bb000b9299	Waffen29	12/2/22 15:19	خطأ في معلومات البطاقة الائتمانية				en	sa	snb-mobile	There is an error when clicking on the exclamation mark on the credit card to display its information and balance, as a message appears saying: "We apologize, you do not have permission for this operation."	ar	error click exclamation mark credit card display information balance message appear say apologize permission operation	Negative	App Store	0	1	0
App Store	02d9669b-3724-4ebd-bfde-686a74317a39	DubleZED	12/5/22 19:13	اسوا تطبيق				en	sa	snb-mobile	The worst bank application in the world, it doesn't even deserve half a star. It's always down every day, and it doesn't send verification codes or activation codes for beneficiaries. Don't even think about dealing with them. ðð½	ar	bad bank application world doesnt even deserve half star always every day doesnt send verification cod activation cod beneficiaries dont even think deal	Negative	App Store	1	1	0
App Store	a0ac2c57-655d-4c68-8756-2b4a5cd1210d	bin mohmmed	12/5/22 11:34	اسوى تطبيق وممكن نخسر بعض				en	sa	snb-mobile	Update is very very bad, it won't change people's perception of me, my appearance needs to change completely.	ar	update bad wont change people perception appearance need change completely	Negative	App Store	1	0	0
App Store	cf143da7-221b-49ce-8e58-47558f84c63f	حسام العبدالله	12/4/22 21:32	تطبيق يحتاج تحديث				en	sa	snb-mobile	My list of payment bills has disappeared completely ð	ar	list payment bill disappear completely	Negative	App Store	0	1	0
App Store	c186e856-1ad3-44b5-82a8-6563519aed26	Aireapezz	12/4/22 16:04	مشاكل تقنية كثيرة.				en	sa	snb-mobile	The new application is better in terms of appearance and easier to use, but it is full of many defects and technical problems, especially in bank transfer operations. On the other hand, the previous one was practical - apart from its appearance and ease of control - it was excellent and rarely did operations fail or randomly redirect you outside the application, as in the new version. We hope tha…	ar	new application good term appearance easy use full many defect technical problems especially bank transfer operations hand previous one practical apart appearance ease control excellent rarely operations fail randomly redirect outside application new version hope staff alahli bank address problems quickly	Negative	App Store	1	1	0
App Store	2f43e8fb-949b-4666-9408-d70f0eed720e	waweha.nonah	12/4/22 12:38	ياليت تعدلونها				en	sa	snb-mobile	The application is excellent, but when I want to add a bill for payment, I cannot leave a space in the name. For example, a bill for (home phone) becomes homephone, which is a mistake and caused me a lot of trouble. Please fix it, I beg you.	ar	application excellent want add bill payment leave space name example bill home phone become homephone mistake cause lot trouble please fix beg	Negative	App Store	1	1	0
App Store	ebcc348f-bf5f-419e-94a8-cdb86492b30b	Riyadh A A G	12/3/22 20:34	مو راضي يحول				en	sa	snb-mobile	Allah will not forgive you. I know that you benefit from keeping the money with you and every minute has its value for you, from yesterday until today. I want to transfer, but I am unable. May Allah hold you accountable if you are doing this intentionally.	ar	allah forgive know benefit keep money every minute value yesterday today want transfer unable may allah hold accountable intentionally	Negative	App Store	1	0	0
App Store	72ba9954-0b9d-4381-be3e-391c7c66af41	Why1173748	12/3/22 19:44	اسوء تطبيق بنكي				en	sa	snb-mobile	Congratulations to the application for winning the award for the worst banking application ever!	ar	congratulations application win award bad bank application ever	Negative	App Store	1	0	0
App Store	50e7ef16-d3d2-45b4-be5e-683a5f65f54b	ضاري بن متعب	12/3/22 16:05	سيء				en	sa	snb-mobile	The application has become very bad after the recent updates, especially in terms of money transfers and payments, and its frequent failures.	ar	application become bad recent update especially term money transfer payments frequent failures	Negative	App Store	1	1	0
App Store	8114d1fa-042c-4c2a-8895-c451a7ce7acd	Shoug20&	12/2/22 22:47	التحديث الجديد ججججداً سيء ويعلق كثييررر !!				en	sa	snb-mobile	The new update is very bad and it hangs a lot!!"	en	new update bad hang lot	Negative	App Store	1	0	1
App Store	fa803c62-4350-4a40-8f57-48089433aab5	الخالدي ٩١١ زيد	12/2/22 20:25	سي في التحويل وفي الدخول لازم يتعدل				en	sa	snb-mobile	Citibank Al Ahli is forbidden, and it is unforgivable that our salaries are in it.	ar	citibank al ahli forbid unforgivable salaries	Negative	App Store	1	0	0
App Store	2edd5fb2-5648-4352-9744-baf2f429417e	Zaaob	12/1/22 12:55	غير مناسب				en	sa	snb-mobile	Needs review and performance improvement.	ar	need review performance improvement	Neutral	App Store	1	0	0
App Store	846ce26c-8fa5-4209-9d89-787a73e73971	norah $	12/2/22 14:25	التطبيق سيء جداً				en	sa	snb-mobile	The application is very bad, it crashes and sometimes kicks me out while I am in the middle of a process. Why don't you fix it and find a solution for it multiple times? I'm thinking of leaving and going to another bank, it would be better.	ar	application bad crash sometimes kick middle process dont fix find solution multiple time im think leave go another bank would good	Negative	App Store	1	1	1
App Store	31e1e34d-03a9-4ea6-8598-2d3d9a535953	مستعاااار	12/1/22 22:58	التطبيق اصبح سيء جدا				en	sa	snb-mobile	He frequently freezes and does not respond to transfers, whether between my accounts or within the bank! And forcefully, it opens, which is unbearable. Fix the application as soon as possible, may God bless you.	ar	frequently freeze respond transfer whether account within bank forcefully open unbearable fix application soon possible may god bless	Negative	App Store	0	1	1
App Store	1a90cece-da0b-4914-b8ac-53f7f1405ba3	alidayel	12/1/22 18:10	🙂				en	sa	snb-mobile	the worst application and Al-Ahli Bank is going from bad to worse. They claimed they merged with Samba and the capital exceeded one trillion!!	ar	bad application alahli bank go bad bad claim merge samba capital exceed one trillion	Negative	App Store	1	0	0
App Store	5caf9707-10b3-498a-b628-d0dbb40975db	Minerals hands	12/1/22 18:03	التطبيق سئ لا بشكله القديم و لا الجديد				en	sa	snb-mobile	The application doesn't open, except during inconvenient times, it doesn't work.	ar	application doesnt open except inconvenient time doesnt work	Negative	App Store	0	1	0
App Store	14b81f59-4d57-471c-8c04-070be4e3331e	قروب واتس	12/1/22 1:43	تطبيق كلة تعليقات				en	sa	snb-mobile	Unfortunately, the application is the worst. The largest bank cannot create a decent application like Zain. Every time I try to transfer money to someone, an error occurs. What is this? I have to go to the ATM, I mean.	ar	unfortunately application bad large bank create decent application like zain every time try transfer money someone error occur go atm mean	Negative	App Store	1	1	0
App Store	12fb413f-4416-49c9-a398-8d4b3c45b33b	hjyggu jug FYI he rgfrrtrr	11/30/22 23:49	التطبيق جدا سيئ				en	sa	snb-mobile	The application is very heavy.	ar	application heavy	Negative	App Store	0	0	1
App Store	25e30162-f8fe-4e85-a1ec-b3249e669a57	anas sadiq	11/30/22 23:43	مشاكل				en	sa	snb-mobile	Many problems of non-conversion, delay, freezing, and every now and then it tells you there is an error.	ar	many problems nonconversion delay freeze every tell error	Negative	App Store	0	1	1
App Store	6ae75091-4025-4f15-94e9-f99438da5666	يارب آسيا من نصيب الهلال	11/30/22 23:34	تقييمي صفر مو 1				en	sa	snb-mobile	The application has become very bad, it keeps redirecting me to the App Store. Find a solution for yourselves, it is unreasonable to continue like this for two months.	ar	application become bad keep redirect app store find solution unreasonable continue like two months	Negative	App Store	1	0	0
App Store	dfdd905c-4f5c-401e-b1c4-8acebb0498fc	Gallafmj	11/29/22 14:20	مشاكل تعريف المستفيدين				en	sa	snb-mobile	The application contains many errors. I tried to add beneficiaries several times from local banks like Bank Al-Riyadh or Al-Rajhi Bank, but it does not accept the IBAN and shows an error, even though the IBAN is complete and copied correctly. The same copy works with other banks and programs. Also, while entering the beneficiary's name, the space button does not work and forces me to write everyt…	ar	application contain many errors try add beneficiaries several time local bank like bank alriyadh alrajhi bank accept iban show error even though iban complete copy correctly copy work bank program also enter beneficiarys name space button work force write everything connect letter therefore prevent add new beneficiaries update program become bad need fix soon possible	Negative	App Store	1	1	0
App Store	b191e2c5-475e-4efc-b649-05bfcdd4836a	شنب الذيب	11/30/22 23:28	تطبيق سيئ جداً				en	sa	snb-mobile	Whoever is able to transfer their salary to another bank, they should do it. It's a piece of advice for God's sake.	ar	whoever able transfer salary another bank piece advice gods sake	Neutral	App Store	1	1	0
App Store	108ebb42-456f-4ac6-9f3f-4215868204a2	رجعو التحديث القديم👊	11/30/22 22:20	عطلان				en	sa	snb-mobile	Always broken	ar	always break	Negative	App Store	0	1	0
App Store	bdccc839-ff07-4d01-921a-c2eaeb6952a4	Yzeez	11/30/22 21:47	تطبيق سئ				en	sa	snb-mobile	First, if you download the application and log in from a new device, it will take two days/48 hours for you to be able to make a "local" transfer, and this is something I haven't seen in any other banking application. Secondly, after waiting for two days, when I try to make a transfer, the application freezes and refuses to make the transfer, with multiple error messages including the application…	ar	first download application log new device take two days hours able make local transfer something havent see bank application secondly wait two days try make transfer application freeze refuse make transfer multiple error message include application crowd sometimes unknown error new update application expect good improvement service good performance expectations disappoint hope add option permanen…	Negative	App Store	0	1	1
App Store	eb4e35fa-416e-4d6e-9a4f-b6eefb88ed6a	أبو ريماز	11/30/22 14:10	فاااشل				en	sa	snb-mobile	Thank you to Al Ahli Bank for opening an account with Al Inma Bank. Only the entire salary is transferred on the 27th of each month and our relationship with you ends.	ar	thank al ahli bank open account al inma bank entire salary transfer th month relationship end	Positive	App Store	0	1	0
App Store	92b3bd6c-18df-4d26-9ff9-c7b2d0bd2f93	✈️🧤	11/30/22 12:12	استعجلوا وحلو المشكلة				en	sa	snb-mobile	Your new update has a problem with logging into the program. Every time I try to log in, it enters and then asks for login again.	ar	new update problem log program every time try log enter ask login	Negative	App Store	0	1	0
App Store	d469ef06-127e-467c-8e69-d11fc2c817d1	الردار نفسه	11/30/22 9:22	A				en	sa	snb-mobile	A complete worst, he brought me so much stress that I cannot enter. The verification process prevented me from accessing my accounts. I can't transfer or pay. What a mess! They should go back to the old update.	ar	complete bad bring much stress enter verification process prevent access account cant transfer pay mess go back old update	Negative	App Store	1	1	0
App Store	4e1f6ac6-8c1e-4eb2-b14b-ef9d4f2b4faa	naflah	11/30/22 7:27	تطبيق فاشل جداً				en	sa	snb-mobile	Bad, bad, bad. Always stuck, either during salary time or at other times. Just stuck and that's it ð¡	ar	bad bad bad always stick either salary time time stick thats	Negative	App Store	1	0	1
App Store	82f24947-6b53-4c43-88c8-1f80179ac9f7	ً☺️	11/29/22 22:11	ً				en	sa	snb-mobile	The application is very very bad. The first application is much better.	ar	application bad first application much good	Negative	App Store	1	0	0
App Store	530cb47d-483f-4918-8afd-d8eaab163cdb	nawafhakami	11/28/22 22:16	التطبيق ثقيل				en	sa	snb-mobile	The design is good and has become beautiful, but the application is very heavy and has problems. Sometimes it doesn't open, and sometimes it hangs. It also doesn't update quickly. If you make an update, please focus on improving the performance of the application, not just the appearance. Thank you.	ar	design good become beautiful application heavy problems sometimes doesnt open sometimes hang also doesnt update quickly make update please focus improve performance application appearance thank	Negative	App Store	1	1	1
App Store	921d58b5-f224-4fdc-bbcc-c2f5e0b3c609	YAHIA MADKHALY	11/29/22 4:49	البنك الاهلي				en	sa	snb-mobile	History and memories! Thank you for all your excellent services that deserve appreciation and recognition. I have a note after the latest update, which is that the application keeps sending you to the app store and asks for an update every time even after updating the application. Maybe there is a programming error. Thank you.	ar	history memories thank excellent service deserve appreciation recognition note late update application keep send app store ask update every time even update application maybe program error thank	Positive	App Store	0	1	0
App Store	49014f55-8db0-4715-938f-b316b635522b	Note-7-2011	11/29/22 3:59	ملاحظات عديدة في البرنامج الجديد				en	sa	snb-mobile	I apologize if I said that the interface looks weak in content. It's true that it has a nice interface and the addition of the quick login feature, but unfortunately, the application's services are less than before and do not live up to the expectations of my favorite bank, Al-Ahli. The previous program was better in terms of services. Here are my observations: 1- It is not possible to add a note…	ar	apologize say interface look weak content true nice interface addition quick login feature unfortunately applications service less live expectations favorite bank alahli previous program good term service observations possible add note transfer personal account service download excel pdf file require transaction statement possible add additional note transaction previous program need amount withd…	Negative	App Store	1	1	0
App Store	f75a0877-2a5c-4f35-83af-c3df2d2d61db	zaidsh0a	11/29/22 2:12	تحديث يعلق				en	sa	snb-mobile	Since the release of this version, I have been hating Al-Ahli every time the program freezes. I hope you find a solution or revert to the old version.	ar	since release version hat alahli every time program freeze hope find solution revert old version	Negative	App Store	0	0	1
App Store	419578a5-4052-4286-9c3c-807978b05c5e	HAMZAH - 1	11/29/22 0:12	التطبيق بحاجة للتطوير				en	sa	snb-mobile	The application needs server development to solve the problem of slowness.	ar	application need server development solve problem slowness	Neutral	App Store	0	0	1
App Store	8babc62d-1050-4a5d-9be9-f115094c3aa4	a-a!@@"	11/28/22 21:44	التطبيق ثقيل				en	sa	snb-mobile	The application is freezing and heavy.	ar	application freeze heavy	Negative	App Store	1	0	1
App Store	35a088cb-6c85-4e34-b1e7-bdea1e7dc565	DT Esraa	11/28/22 22:02	👎🏻				en	sa	snb-mobile	The application is very bad and it crashes.	ar	application bad crash	Negative	App Store	1	1	0
App Store	263df830-fec3-4588-9d94-b80195673f7c	عماد السليماني	11/28/22 21:58	التطبيق سيئ				en	sa	snb-mobile	Very bad and frustrating, it raises my blood pressure.	ar	bad frustrate raise blood pressure	Negative	App Store	1	0	0
App Store	52a8741f-35fd-4e0b-8e48-8a1dc30a16df	ابو جمجمههه	11/28/22 21:37	اسوء تطبيق بنك				en	sa	snb-mobile	The worst banking application	ar	bad bank application	Negative	App Store	1	0	0
App Store	85065322-ae7f-4bc5-a9f3-3d9221dcff88	Fa075	11/28/22 18:20	!!!				en	sa	snb-mobile	"Disabled and complex customers are not satisfied that the bank's data is not being updated through the application like other banks. I don't know when this backward bank will be fixed."	ar	disable complex customers satisfy bank data update application like bank dont know backward bank fix	Negative	App Store	1	0	0
App Store	52102101-8872-4e04-9e5a-f36fdbd45700	salwa @	11/27/22 13:18	مشكلة				en	sa	snb-mobile	The program used to work fine for me, but now it refuses to make transfers. What could be the reason?	ar	program use work fine refuse make transfer could reason	Negative	App Store	0	1	0
App Store	3ec6aca6-eacd-49d7-a8b7-eca749563981	KaitoXVIII	11/28/22 10:39	اسوء تطبيق لبنك في السعودية				en	sa	snb-mobile	I only use the application once a month and every time it freezes, so imagine what would happen if I used it daily. It always crashes, some menus don't appear, and it's slow. A very bad user experience.	ar	use application month every time freeze imagine would happen use daily always crash menus dont appear slow bad user experience	Negative	App Store	1	1	1
App Store	d95849b3-148c-48c3-8c37-f2fce0a560c1	ابو عبدالله المظيبري	11/28/22 2:39	سيء				en	sa	snb-mobile	Fail / Failure	ar	fail failure	Negative	App Store	0	1	0
App Store	0c6fea2f-a07c-4f5c-b36b-e58c6b42b107	بعد تجربة البرنامج	11/27/22 21:40	تجربة				en	sa	snb-mobile	Not good and not practical. Many services cannot be performed in the old application.	ar	good practical many service perform old application	Negative	App Store	1	0	0
App Store	be76d717-881c-49f0-bb90-79cf2c5f6558	7koo	11/27/22 19:59	تطبيق فاشل وسيء جداً				en	sa	snb-mobile	I swear to God, this is the worst application. It used to process local transfers, and now it doesn't even accept transfers within Al Ahli Bank. Please greet Al Rajhi Bank for me. It's really unfair that one has to deal with this application.	ar	swear god bad application use process local transfer doesnt even accept transfer within al ahli bank please greet al rajhi bank really unfair one deal application	Negative	App Store	1	1	0
App Store	de3a8041-5842-4f70-9b62-4d13e519b0c6	سييءء	11/27/22 16:05	ولانجمه				en	sa	snb-mobile	There is no meaning or coherence in the provided text.	ar	mean coherence provide text	Negative	App Store	1	0	0
App Store	a6b5722b-8783-4c4b-9ee1-c83eb54e9846	Fahad Aloufi	11/27/22 15:50	تطبيق فاشل				en	sa	snb-mobile	A bad and worst application that freezes a lot and sometimes doesn't respond, and it is always out of service. Al Ahli Bank services are going from bad to worse.	ar	bad bad application freeze lot sometimes doesnt respond always service al ahli bank service go bad bad	Negative	App Store	1	1	1
App Store	dd9fe524-b876-4ce9-a2ed-05ad73aab834	x.osho	11/27/22 15:26	تطبيق سيء جداً				en	sa	snb-mobile	Most of the services do not work due to frequent bank updates. Every day there is a new update for the bank and the application, and at unpredictable times. It is not possible to benefit from the application as it has many problems. The bank needs someone with experience in technology and programming, even during peak times, the application does not work due to technical issues. You remain the wo…	ar	service work due frequent bank update every day new update bank application unpredictable time possible benefit application many problems bank need someone experience technology program even peak time application work due technical issue remain bad bank kingdom saudi arabia	Negative	App Store	1	1	0
App Store	a8bfa1e5-ec72-46b4-b057-5e2e5c362402	mdngi slbf	11/27/22 14:46	…				en	sa	snb-mobile	Very bad and constantly crashes.	ar	bad constantly crash	Negative	App Store	1	1	0
App Store	9fa77a03-bf6c-4847-a865-b3c46591e46c	algabre994	11/27/22 13:59	المدينة المنورة				en	sa	snb-mobile	Very bad, terrible version.	ar	bad terrible version	Negative	App Store	1	0	0
App Store	467e5be7-1775-4b0f-9aa6-c4e484578ad5	uhjdkkfjffjfjfj	11/27/22 13:52	زي الزفت				en	sa	snb-mobile	What is the sign-in?	ar	signin	Neutral	App Store	0	1	0
App Store	0228abb1-2a06-442f-84f4-0f04e0b89437	f2829	11/27/22 12:37	التطبيق معفن				en	sa	snb-mobile	Every now and then there are mistakes in the previous application. Improvement is better.	ar	every mistake previous application improvement good	Neutral	App Store	1	0	0
App Store	6a545252-17f6-40a6-aeab-a812a8e779bd	Os_8	11/27/22 11:28	يحتاج الى تطوير				en	sa	snb-mobile	The application needs modification. I am unable to convert.	ar	application need modification unable convert	Negative	App Store	0	1	0
App Store	b935bae1-41fe-4240-821a-962c824fd339	mo,On	11/27/22 2:32	تطبيق سييييء				en	sa	snb-mobile	Unfortunately, it is a bad application. The previous application was referred to as "Al-Benan." I am currently in the process of transferring to another bank.	ar	unfortunately bad application previous application refer albenan currently process transfer another bank	Negative	App Store	1	0	0
App Store	5472e998-70e6-4933-9b2d-f2b19a31bca3	majedmmz	11/27/22 2:16	لا اوصي به				en	sa	snb-mobile	The application is very very bad and does not serve.	ar	application bad serve	Negative	App Store	1	0	0
App Store	6dc6df6e-e646-45ea-954b-77110ae65bcc	هنكوزبسل	11/27/22 2:08	ا				en	sa	snb-mobile	My God, your service raises blood pressure; 24 hours of maintenance and it gets stuck.	ar	god service raise blood pressure hours maintenance get stick	Negative	App Store	1	0	1
App Store	7e41e2ed-bbcc-4e18-ace5-fff23bdd8601	foaad017	11/27/22 2:03	التطبيق				en	sa	snb-mobile	The application is very bad, it hangs and delays for 24 hours.	ar	application bad hang delay hours	Negative	App Store	1	0	1
App Store	b022a5d8-03e0-4a4a-931d-72ead9335c46	zhron	11/27/22 1:56	الاهلي موبايل				en	sa	snb-mobile	Honestly, the worst application. Some services are good, but the operations are very poor in terms of efficiency.	ar	honestly bad application service good operations poor term efficiency	Negative	App Store	1	0	0
App Store	77faafd5-9a6e-4599-8851-03200b084eaf	تتتاااااللبللاا	11/27/22 1:42	التحديث م يستحق نجمه👎				en	sa	snb-mobile	aaa	ar	aaa	Positive	App Store	0	0	0
App Store	e6bacc09-3cf0-4a63-871c-66b960ee0e11	ayman alheri	11/27/22 1:15	اغبى برنامج يتعطل وقت نزول الراتب				en	sa	snb-mobile	The dumbest banking program, all the money and benefits that come from the customers, and you are not even able to develop a decent program to serve us. You have ruined our livelihoods. May God not grant you success.	ar	dumb bank program money benefit come customers even able develop decent program serve us ruin livelihoods may god grant success	Negative	App Store	1	0	0
App Store	ba758251-7de0-42ae-88b6-22ade0dd5d37	هنوده١١	11/19/22 10:23	دورنا				en	sa	snb-mobile	Bank statements are not issued.	ar	bank statements issue	Neutral	App Store	0	1	0
App Store	2d08d331-98c6-4022-9da0-48fc2bb7828f	راكان ١١٢١	11/27/22 1:14	.				en	sa	snb-mobile	It hangs a lot.	ar	hang lot	Neutral	App Store	0	0	1
App Store	a8d91f96-21bb-44dc-86b9-dcdbc7fbc4a3	muhlhl	11/27/22 1:03	ارتقوا بأنفسكم				en	sa	snb-mobile	Be ashamed of yourselves, the new banks have surpassed you, and their application is better and more efficient than yours. By God, it's shameful, truly shameful, for this to be a bank's application.	ar	ashamed new bank surpass application good efficient god shameful truly shameful bank application	Negative	App Store	1	0	0
App Store	246e7bfe-2d7e-450b-8da3-677fad47297a	Bosssss84	11/26/22 11:18	تطبيق سيء				en	sa	snb-mobile	The application is extremely bad and it is not easy to access the account.	ar	application extremely bad easy access account	Negative	App Store	1	0	0
App Store	51907b12-959b-46be-8a82-debbadc894c4	mm199544	11/25/22 15:49	لا يريد التطبيق ان يفتح حساب جديد و يوجد فيه خلل				en	sa	snb-mobile	He doesn't want to open an account.	ar	doesnt want open account	Neutral	App Store	0	1	0
App Store	d6cba237-3cc5-46cc-9ae9-acf097b821b3	عميل للبنك ٢٢٠٠٣٣٠٠	11/25/22 13:22	تطبيق سيئ				en	sa	snb-mobile	The worst banking application I have ever come across.. It raises the blood pressure.	ar	bad bank application ever come across raise blood pressure	Negative	App Store	1	0	0
App Store	6e2238b0-506a-4e50-8cf3-88977dcc8666	fawzuli	11/25/22 12:29	شيء				en	sa	snb-mobile	Does not accept update, bad.	ar	accept update bad	Negative	App Store	1	1	0
App Store	2f9d7413-a0a8-4175-9e7a-00bd622ea855	ممتاز البرنامج ومريح	11/25/22 7:37	زي الزفت				en	sa	snb-mobile	For a long time, I've been trying to update the information, but it refuses to update. Eventually, it froze my account. I don't know why, I swear Samba never used to torture us like this.	ar	long time ive try update information refuse update eventually freeze account dont know swear samba never use torture us like	Negative	App Store	0	0	1
App Store	345eb74e-173a-4905-a6bd-ddc6224b24d0	lwjghcjwix	11/23/22 21:46	.				en	sa	snb-mobile	Honestly, after 12 o'clock, I can't transfer or receive any money or do anything. I hope there is a solution.	ar	honestly oclock cant transfer receive money anything hope solution	Negative	App Store	0	1	0
App Store	2c2bc870-013b-4d60-b918-0319e5a67512	&@&@&@&@&@&١٢٥٧٧	11/23/22 21:18	سيئ				en	sa	snb-mobile	The new update is very bad. I don't mind benefiting from Al Rajhi's fast response and their services.	ar	new update bad dont mind benefit al rajhis fast response service	Negative	App Store	1	0	0
App Store	750fd728-cd67-44d2-82ab-5f4ced3b833a	عبدالله التميمي ......	11/23/22 13:06	سيئ				en	sa	snb-mobile	Bad and the customer service is worse !!!	ar	bad customer service bad	Negative	App Store	1	0	0
[truncated: 800 more rows]
