# Supplementary material for: Retrieval-augmented generation analysis of user reviews in Saudi mobile banking apps: a comparative user experience study of iOS and Android
Source: PeerJ journal article supplement (doi:10.7717/peerj-cs.3565), 2026-02-06
Supplement: Sentiment_Annotation_Guide_Positive_Negative_Neutral.pdf [file Sentiment_Annotation_Guide_Positive_Negative_Neutral.pdf]

## Sentiment Annotation Guide (Positive, Negative, Neutral)

### 1- Positive Sentiment

**Definition:** Expresses user satisfaction, appreciation, or approval toward the app's features, performance, or design. The tone reflects positive emotions such as happiness, trust, or enjoyment.

- Examples:
  - "I love this app, it's very easy to use."
  - "Great performance and quick updates."

### 2- Negative Sentiment

**Definition:** Conveys user dissatisfaction, frustration, or criticism toward the app's functionality, reliability, or overall experience. The tone reflects negative emotions such as anger, disappointment, or annoyance.

- Examples:
  - "This app crashes all the time."
  - "Very slow and full of bugs."

### 3- Neutral Sentiment

**Definition:** States factual or descriptive information without expressing clear positive or negative emotions. The review provides observations or requests without emotional intensity.

- Examples:
  - "I used the app yesterday to check my balance."
  - "I downloaded the app for my phone."

Aligned with best practices in sentiment analysis for user-generated content, reflecting emotional polarity (positive, negative, neutral) as core indicators of user perception.
