# Supplementary material for: Retrieval-augmented generation analysis of user reviews in Saudi mobile banking apps: a comparative user experience study of iOS and Android
Source: PeerJ journal article supplement (doi:10.7717/peerj-cs.3565), 2026-02-06
Supplement: usability_annotations_gold.xlsx [file usability_annotations_gold.xlsx]

## Sheet: annotator_1
review_id	review_description	Sentiment	Satisfaction	Effectiveness	Efficiency
d36b2a5b-15fd-4853-9b20-315900e7f516	All good... but back operation is not working ... some time hanging at the time of open the app.	Negative	0	0	1
9b481332-0126-48cd-8feb-586c09728a8a	Reoccurring sign issues(connectivity message). I have to force close the app and clear cache almost each time! Also, the fingerprint log in keeps getting disabled	Negative	0	1	0
938c129b-5090-40cc-8d6f-230d4db2ccd5	Performance is not good.. Always issues with signing in.. Crush more frequently	Negative	0	1	0
5a5fc7bb-a511-44d3-9e9e-6d4ff80546dc	Not working , only leads to web browser	Negative	0	1	0
ac6c6de7-ffd2-49e9-b2c9-14677f49a04c	Very bad	Negative	1	0	0
ddadfab6-6aae-4bcc-ba93-5913d859b2b8	refund is too many late	Negative	0	0	1
29e3a222-8eda-49e8-9188-cf5828ff3977	Now-a-days very bad No login too much problem creating	Negative	1	1	0
69afc42d-1418-45eb-86c8-20659785991b	May be there have some problem of this apps. When I trying to open this apps. This is automatically come exit. Please solve this issues	Negative	0	1	0
0d4943d9-0931-4151-bdf9-2acf29ba0081	Past 3 days Unable to login due to server connectivity issue	Negative	0	1	0
d036b501-4a72-4406-9c68-603e2cdc5e03	SNB is going down hell. Please, return us back to Samba.	Negative	1	0	0
f5bf5d9e-07ad-4d32-bec1-5d663d279b89	Last update too much bad	Negative	1	0	0
7498b4c6-7e45-4250-b1c8-0c148aa39599	satisfied via apps transaction, but bankers behavior is bad	Negative	1	0	0
1b0e16cf-dccf-423b-a1fd-d0b7ed088cbc	he take long time te to access the account.. & some time he did not let you in üëé	Negative	0	1	1
7e3fdc58-d143-477f-9aee-48732245f799	well protected app but sometimes it's over protecting	Negative	1	0	0
36cf9df1-3d72-427b-8905-49593f80a2ea	Not work when I open it's close again and again	Negative	0	1	0
9736dd2f-b7cc-4d34-8549-530ea8c229f5	No one can register it. What's the use of its not working online. It's says to visit branch. Really that makes no sense if online facilities are not there.	Negative	0	1	0
9b625706-a3d8-4960-abfb-a8dccff0a4ef	Not good as the older, it doesn't work	Negative	1	1	0
f8a19d03-1afa-426e-8c2f-f3d443150192	Not working properly. one's you open it's Freeze	Negative	0	1	1
57b2f77b-a2ab-45bb-948f-11f47fc04158	Doesn't work.. IAM so angry üò°	Negative	1	1	0
392bbb8c-3d00-409a-9bc8-adbf37b81c54	Very slow, very faulty, not up to date with other banking apps.	Negative	1	0	1
60b036b1-0981-4d0a-983c-26c33bf618c6	software keep crashing, problem appears long time ago and still on going	Negative	0	1	0
2e442825-6449-4606-9dc9-c5db389480b4	The app is not working completely Zero percent functionality I urge you all to stop using this app and start using apps from other competitors	Negative	1	1	0
45f30819-132e-4688-98d9-6349ea413d9b	After the last app maintenance, I can't transfer on my urpay account,, says General integration error.. same on the urpay app.. I can't add money from my alrajhi account..	Negative	0	1	0
f7f6ccb6-8bf6-411d-86d7-1b8e3ee9fb94	When i open the app it goes direct web browser to open.app does not work. Please solve the problem.	Negative	0	1	0
1eaa9776-eeda-4918-84ce-4b73fa8a7714	It's difficult to access. The old version was far more better!	Negative	1	1	0
7ba5d3ff-8794-430b-a7d3-f613373c0c6e	Why its showing me always to upgrade.	Negative	1	0	0
53a48a74-63fb-4996-b4d5-36e157717bbe	It keeps crashing and freezing... What a shame...	Negative	1	1	1
6096c06b-f0da-491f-b31a-ac4300960ad6	New update can't use app anymore and can't use old version as won't let me login	Negative	0	1	0
2b5d7178-ea85-45ba-9c59-40a240f32fe7	It is really vey silly to have a bank application on slow motion	Negative
60183b72-2c55-424d-a78f-9c172de2ce4b	I forgot my password I can't use the app	Negative

## Sheet: annotator_2
review_id	review_description	Sentiment	Satisfaction	Effectiveness	Efficiency
d36b2a5b-15fd-4853-9b20-315900e7f516	All good... but back operation is not working ... some time hanging at the time of open the app.	Negative	0	1	1
9b481332-0126-48cd-8feb-586c09728a8a	Reoccurring sign issues(connectivity message). I have to force close the app and clear cache almost each time! Also, the fingerprint log in keeps getting disabled	Negative	0	1	0
938c129b-5090-40cc-8d6f-230d4db2ccd5	Performance is not good.. Always issues with signing in.. Crush more frequently	Negative	0	1	0
5a5fc7bb-a511-44d3-9e9e-6d4ff80546dc	Not working , only leads to web browser	Negative	0	1	0
ac6c6de7-ffd2-49e9-b2c9-14677f49a04c	Very bad	Negative	1	0	0
ddadfab6-6aae-4bcc-ba93-5913d859b2b8	refund is too many late	Negative	0	0	1
29e3a222-8eda-49e8-9188-cf5828ff3977	Now-a-days very bad No login too much problem creating	Negative	1	1	0
69afc42d-1418-45eb-86c8-20659785991b	May be there have some problem of this apps. When I trying to open this apps. This is automatically come exit. Please solve this issues	Negative	0	1	0
0d4943d9-0931-4151-bdf9-2acf29ba0081	Past 3 days Unable to login due to server connectivity issue	Negative	0	1	0
d036b501-4a72-4406-9c68-603e2cdc5e03	SNB is going down hell. Please, return us back to Samba.	Negative	1	0	0
f5bf5d9e-07ad-4d32-bec1-5d663d279b89	Last update too much bad	Negative	1	0	0
7498b4c6-7e45-4250-b1c8-0c148aa39599	satisfied via apps transaction, but bankers behavior is bad	Negative	1	0	0
1b0e16cf-dccf-423b-a1fd-d0b7ed088cbc	he take long time te to access the account.. & some time he did not let you in üëé	Negative	0	1	1
7e3fdc58-d143-477f-9aee-48732245f799	well protected app but sometimes it's over protecting	Negative	1	0	0
36cf9df1-3d72-427b-8905-49593f80a2ea	Not work when I open it's close again and again	Negative	0	1	0
9736dd2f-b7cc-4d34-8549-530ea8c229f5	No one can register it. What's the use of its not working online. It's says to visit branch. Really that makes no sense if online facilities are not there.	Negative	0	1	0
9b625706-a3d8-4960-abfb-a8dccff0a4ef	Not good as the older, it doesn't work	Negative	1	1	0
f8a19d03-1afa-426e-8c2f-f3d443150192	Not working properly. one's you open it's Freeze	Negative	0	1	0
57b2f77b-a2ab-45bb-948f-11f47fc04158	Doesn't work.. IAM so angry üò°	Negative	1	1	0
392bbb8c-3d00-409a-9bc8-adbf37b81c54	Very slow, very faulty, not up to date with other banking apps.	Negative	1	0	1
60b036b1-0981-4d0a-983c-26c33bf618c6	software keep crashing, problem appears long time ago and still on going	Negative	0	1	0
2e442825-6449-4606-9dc9-c5db389480b4	The app is not working completely Zero percent functionality I urge you all to stop using this app and start using apps from other competitors	Negative	1	1	0
45f30819-132e-4688-98d9-6349ea413d9b	After the last app maintenance, I can't transfer on my urpay account,, says General integration error.. same on the urpay app.. I can't add money from my alrajhi account..	Negative	0	1	0
f7f6ccb6-8bf6-411d-86d7-1b8e3ee9fb94	When i open the app it goes direct web browser to open.app does not work. Please solve the problem.	Negative	0	1	0
1eaa9776-eeda-4918-84ce-4b73fa8a7714	It's difficult to access. The old version was far more better!	Negative	1	1	0
7ba5d3ff-8794-430b-a7d3-f613373c0c6e	Why its showing me always to upgrade.	Negative	1	0	0
53a48a74-63fb-4996-b4d5-36e157717bbe	It keeps crashing and freezing... What a shame...	Negative	1	1	0
6096c06b-f0da-491f-b31a-ac4300960ad6	New update can't use app anymore and can't use old version as won't let me login	Negative	1	1	0
2b5d7178-ea85-45ba-9c59-40a240f32fe7	It is really vey silly to have a bank application on slow motion	Negative	1	0	1
60183b72-2c55-424d-a78f-9c172de2ce4b	I forgot my password I can't use the app	Negative	0	1	0

## Sheet: annotator_3
review_id	review_description	Sentiment	Satisfaction	Effectiveness	Efficiency
d36b2a5b-15fd-4853-9b20-315900e7f516	All good... but back operation is not working ... some time hanging at the time of open the app.	Negative	0	1	1
9b481332-0126-48cd-8feb-586c09728a8a	Reoccurring sign issues(connectivity message). I have to force close the app and clear cache almost each time! Also, the fingerprint log in keeps getting disabled	Negative	0	1	0
938c129b-5090-40cc-8d6f-230d4db2ccd5	Performance is not good.. Always issues with signing in.. Crush more frequently	Negative	0	1	1
5a5fc7bb-a511-44d3-9e9e-6d4ff80546dc	Not working , only leads to web browser	Negative	0	1	0
ac6c6de7-ffd2-49e9-b2c9-14677f49a04c	Very bad	Negative	1	0	0
ddadfab6-6aae-4bcc-ba93-5913d859b2b8	refund is too many late	Negative	0	0	1
29e3a222-8eda-49e8-9188-cf5828ff3977	Now-a-days very bad No login too much problem creating	Negative	1	1	0
69afc42d-1418-45eb-86c8-20659785991b	May be there have some problem of this apps. When I trying to open this apps. This is automatically come exit. Please solve this issues	Negative	0	1	0
0d4943d9-0931-4151-bdf9-2acf29ba0081	Past 3 days Unable to login due to server connectivity issue	Negative	0	1	0
d036b501-4a72-4406-9c68-603e2cdc5e03	SNB is going down hell. Please, return us back to Samba.	Negative	1	0	0
f5bf5d9e-07ad-4d32-bec1-5d663d279b89	Last update too much bad	Negative	1	0	0
7498b4c6-7e45-4250-b1c8-0c148aa39599	satisfied via apps transaction, but bankers behavior is bad	Negative	1	0	0
1b0e16cf-dccf-423b-a1fd-d0b7ed088cbc	he take long time te to access the account.. & some time he did not let you in üëé	Negative	0	1	1
7e3fdc58-d143-477f-9aee-48732245f799	well protected app but sometimes it's over protecting	Negative	1	0	0
36cf9df1-3d72-427b-8905-49593f80a2ea	Not work when I open it's close again and again	Negative	0	1	0
9736dd2f-b7cc-4d34-8549-530ea8c229f5	No one can register it. What's the use of its not working online. It's says to visit branch. Really that makes no sense if online facilities are not there.	Negative	1	1	0
9b625706-a3d8-4960-abfb-a8dccff0a4ef	Not good as the older, it doesn't work	Negative	1	0	0
f8a19d03-1afa-426e-8c2f-f3d443150192	Not working properly. one's you open it's Freeze	Negative	0	1	0
57b2f77b-a2ab-45bb-948f-11f47fc04158	Doesn't work.. IAM so angry üò°	Negative	1	1	0
392bbb8c-3d00-409a-9bc8-adbf37b81c54	Very slow, very faulty, not up to date with other banking apps.	Negative	1	1	1
60b036b1-0981-4d0a-983c-26c33bf618c6	software keep crashing, problem appears long time ago and still on going	Negative	0	1	0
2e442825-6449-4606-9dc9-c5db389480b4	The app is not working completely Zero percent functionality I urge you all to stop using this app and start using apps from other competitors	Negative	1	1	0
45f30819-132e-4688-98d9-6349ea413d9b	After the last app maintenance, I can't transfer on my urpay account,, says General integration error.. same on the urpay app.. I can't add money from my alrajhi account..	Negative	0	1	0
f7f6ccb6-8bf6-411d-86d7-1b8e3ee9fb94	When i open the app it goes direct web browser to open.app does not work. Please solve the problem.	Negative	0	1	0
1eaa9776-eeda-4918-84ce-4b73fa8a7714	It's difficult to access. The old version was far more better!	Negative	1	0	0
7ba5d3ff-8794-430b-a7d3-f613373c0c6e	Why its showing me always to upgrade.	Negative	1	0	0
53a48a74-63fb-4996-b4d5-36e157717bbe	It keeps crashing and freezing... What a shame...	Negative	1	1	0
6096c06b-f0da-491f-b31a-ac4300960ad6	New update can't use app anymore and can't use old version as won't let me login	Negative	0	1	0
2b5d7178-ea85-45ba-9c59-40a240f32fe7	It is really vey silly to have a bank application on slow motion	Negative	1	0	1
60183b72-2c55-424d-a78f-9c172de2ce4b	I forgot my password I can't use the app	Negative	1	0	0

## Sheet: gold
review_id	review_description	Sentiment	Satisfaction	Effectiveness	Efficiency
d36b2a5b-15fd-4853-9b20-315900e7f516	All good... but back operation is not working ... some time hanging at the time of open the app.	Negative	0	1	1
9b481332-0126-48cd-8feb-586c09728a8a	Reoccurring sign issues(connectivity message). I have to force close the app and clear cache almost each time! Also, the fingerprint log in keeps getting disabled	Negative	0	1	0
938c129b-5090-40cc-8d6f-230d4db2ccd5	Performance is not good.. Always issues with signing in.. Crush more frequently	Negative	0	1	0
5a5fc7bb-a511-44d3-9e9e-6d4ff80546dc	Not working , only leads to web browser	Negative	0	1	0
ac6c6de7-ffd2-49e9-b2c9-14677f49a04c	Very bad	Negative	1	0	0
ddadfab6-6aae-4bcc-ba93-5913d859b2b8	refund is too many late	Negative	0	0	1
29e3a222-8eda-49e8-9188-cf5828ff3977	Now-a-days very bad No login too much problem creating	Negative	1	1	0
69afc42d-1418-45eb-86c8-20659785991b	May be there have some problem of this apps. When I trying to open this apps. This is automatically come exit. Please solve this issues	Negative	0	1	0
0d4943d9-0931-4151-bdf9-2acf29ba0081	Past 3 days Unable to login due to server connectivity issue	Negative	0	1	0
d036b501-4a72-4406-9c68-603e2cdc5e03	SNB is going down hell. Please, return us back to Samba.	Negative	1	0	0
f5bf5d9e-07ad-4d32-bec1-5d663d279b89	Last update too much bad	Negative	1	0	0
7498b4c6-7e45-4250-b1c8-0c148aa39599	satisfied via apps transaction, but bankers behavior is bad	Negative	1	0	0
1b0e16cf-dccf-423b-a1fd-d0b7ed088cbc	he take long time te to access the account.. & some time he did not let you in üëé	Negative	0	1	1
7e3fdc58-d143-477f-9aee-48732245f799	well protected app but sometimes it's over protecting	Negative	1	0	0
36cf9df1-3d72-427b-8905-49593f80a2ea	Not work when I open it's close again and again	Negative	0	1	0
9736dd2f-b7cc-4d34-8549-530ea8c229f5	No one can register it. What's the use of its not working online. It's says to visit branch. Really that makes no sense if online facilities are not there.	Negative	0	1	0
9b625706-a3d8-4960-abfb-a8dccff0a4ef	Not good as the older, it doesn't work	Negative	1	1	0
f8a19d03-1afa-426e-8c2f-f3d443150192	Not working properly. one's you open it's Freeze	Negative	0	1	0
57b2f77b-a2ab-45bb-948f-11f47fc04158	Doesn't work.. IAM so angry üò°	Negative	1	1	0
392bbb8c-3d00-409a-9bc8-adbf37b81c54	Very slow, very faulty, not up to date with other banking apps.	Negative	1	0	1
60b036b1-0981-4d0a-983c-26c33bf618c6	software keep crashing, problem appears long time ago and still on going	Negative	0	1	0
2e442825-6449-4606-9dc9-c5db389480b4	The app is not working completely Zero percent functionality I urge you all to stop using this app and start using apps from other competitors	Negative	1	1	0
45f30819-132e-4688-98d9-6349ea413d9b	After the last app maintenance, I can't transfer on my urpay account,, says General integration error.. same on the urpay app.. I can't add money from my alrajhi account..	Negative	0	1	0
f7f6ccb6-8bf6-411d-86d7-1b8e3ee9fb94	When i open the app it goes direct web browser to open.app does not work. Please solve the problem.	Negative	0	1	0
1eaa9776-eeda-4918-84ce-4b73fa8a7714	It's difficult to access. The old version was far more better!	Negative	1	1	0
7ba5d3ff-8794-430b-a7d3-f613373c0c6e	Why its showing me always to upgrade.	Negative	1	0	0
53a48a74-63fb-4996-b4d5-36e157717bbe	It keeps crashing and freezing... What a shame...	Negative	1	1	0
6096c06b-f0da-491f-b31a-ac4300960ad6	New update can't use app anymore and can't use old version as won't let me login	Negative	0	1	0
2b5d7178-ea85-45ba-9c59-40a240f32fe7	It is really vey silly to have a bank application on slow motion	Negative	1	0	1
60183b72-2c55-424d-a78f-9c172de2ce4b	I forgot my password I can't use the app	Negative			0

## Sheet: model_pred
review_id	review_description	Sentiment	Satisfaction	Effectiveness	Efficiency
d36b2a5b-15fd-4853-9b20-315900e7f516	All good... but back operation is not working ... some time hanging at the time of open the app.	Negative	0	0	1
9b481332-0126-48cd-8feb-586c09728a8a	Reoccurring sign issues(connectivity message). I have to force close the app and clear cache almost each time! Also, the fingerprint log in keeps getting disabled	Negative	0	1	0
938c129b-5090-40cc-8d6f-230d4db2ccd5	Performance is not good.. Always issues with signing in.. Crush more frequently	Negative	0	1	0
5a5fc7bb-a511-44d3-9e9e-6d4ff80546dc	Not working , only leads to web browser	Negative	0	1	0
ac6c6de7-ffd2-49e9-b2c9-14677f49a04c	Very bad	Negative	1	0	0
ddadfab6-6aae-4bcc-ba93-5913d859b2b8	refund is too many late	Negative	0	1	0
29e3a222-8eda-49e8-9188-cf5828ff3977	Now-a-days very bad No login too much problem creating	Negative	0	1	0
69afc42d-1418-45eb-86c8-20659785991b	May be there have some problem of this apps. When I trying to open this apps. This is automatically come exit. Please solve this issues	Negative	0	1	0
0d4943d9-0931-4151-bdf9-2acf29ba0081	Past 3 days Unable to login due to server connectivity issue	Negative	0	1	0
d036b501-4a72-4406-9c68-603e2cdc5e03	SNB is going down hell. Please, return us back to Samba.	Negative	1	0	0
f5bf5d9e-07ad-4d32-bec1-5d663d279b89	Last update too much bad	Negative	1	0	0
7498b4c6-7e45-4250-b1c8-0c148aa39599	satisfied via apps transaction, but bankers behavior is bad	Negative	1	0	0
1b0e16cf-dccf-423b-a1fd-d0b7ed088cbc	he take long time te to access the account.. & some time he did not let you in üëé	Negative	0	1	1
7e3fdc58-d143-477f-9aee-48732245f799	well protected app but sometimes it's over protecting	Negative	1	0	0
36cf9df1-3d72-427b-8905-49593f80a2ea	Not work when I open it's close again and again	Negative	0	1	0
9736dd2f-b7cc-4d34-8549-530ea8c229f5	No one can register it. What's the use of its not working online. It's says to visit branch. Really that makes no sense if online facilities are not there.	Negative	0	1	0
9b625706-a3d8-4960-abfb-a8dccff0a4ef	Not good as the older, it doesn't work	Negative	1	1	0
f8a19d03-1afa-426e-8c2f-f3d443150192	Not working properly. one's you open it's Freeze	Negative	0	0	1
57b2f77b-a2ab-45bb-948f-11f47fc04158	Doesn't work.. IAM so angry üò°	Negative	1	1	0
392bbb8c-3d00-409a-9bc8-adbf37b81c54	Very slow, very faulty, not up to date with other banking apps.	Negative	1	0	1
60b036b1-0981-4d0a-983c-26c33bf618c6	software keep crashing, problem appears long time ago and still on going	Negative	0	1	0
2e442825-6449-4606-9dc9-c5db389480b4	The app is not working completely Zero percent functionality I urge you all to stop using this app and start using apps from other competitors	Negative	1	1	0
45f30819-132e-4688-98d9-6349ea413d9b	After the last app maintenance, I can't transfer on my urpay account,, says General integration error.. same on the urpay app.. I can't add money from my alrajhi account..	Negative	0	1	0
f7f6ccb6-8bf6-411d-86d7-1b8e3ee9fb94	When i open the app it goes direct web browser to open.app does not work. Please solve the problem.	Negative	0	1	0
1eaa9776-eeda-4918-84ce-4b73fa8a7714	It's difficult to access. The old version was far more better!	Negative	1	1	0
7ba5d3ff-8794-430b-a7d3-f613373c0c6e	Why its showing me always to upgrade.	Negative	1	0	0
53a48a74-63fb-4996-b4d5-36e157717bbe	It keeps crashing and freezing... What a shame...	Negative	1	1	1
6096c06b-f0da-491f-b31a-ac4300960ad6	New update can't use app anymore and can't use old version as won't let me login	Negative	0	1	0
2b5d7178-ea85-45ba-9c59-40a240f32fe7	It is really vey silly to have a bank application on slow motion	Negative	1	0	1
60183b72-2c55-424d-a78f-9c172de2ce4b	I forgot my password I can't use the app	Negative	0	1	0
